# Supplementary material
Source: PubMed Central journal article supplement (PMC2234165)
Supplement: pnas_0706983105_4.pdf [file pnas_0706983105_4.pdf]

**Supporting Table 1A. List of Proteins Detected in the Human Tip49a/b Dataset.**  
pages 2-6

**Supporting Table 1B. Detailed List of Proteins and Peptides Detected in the Combined Human TIP49a/b Dataset.**  
pages 7-277

**Supporting Table 1C. List of Proteins after contaminant extraction and SVD ranking.**  
pages 278-279

# Supporting Table 1A. List of Proteins Detected in the Human TIP49a/b Dataset.

The number of peptides (column header ends with \_P), number of spectra (\_S), sequence coverage (\_SC), and normalized spectral abundance factor (\_NSAF) are specified for each run (i.e. each run is represented by 4 columns of numbers). Proteins are grouped by: "proteins detected in *n* runs", proteins detected in (*n*-1) runs, and proteins unique to each run.

The table is a dense grid of data with approximately 100 columns and many rows. The columns are color-coded in vertical bands: grey, green, pink, orange, yellow, light green, light blue, purple, dark purple, magenta, yellow, cyan, blue, green, orange, red, dark green, blue, grey, brown, red, light blue, and white. Each row represents a protein, and the columns contain various metrics such as protein names, peptide counts (e.g., \_P), spectra counts (e.g., \_S), sequence coverage (e.g., \_SC), and normalized spectral abundance factor (e.g., \_NSAF). The text is small and difficult to read due to the high density and color background.

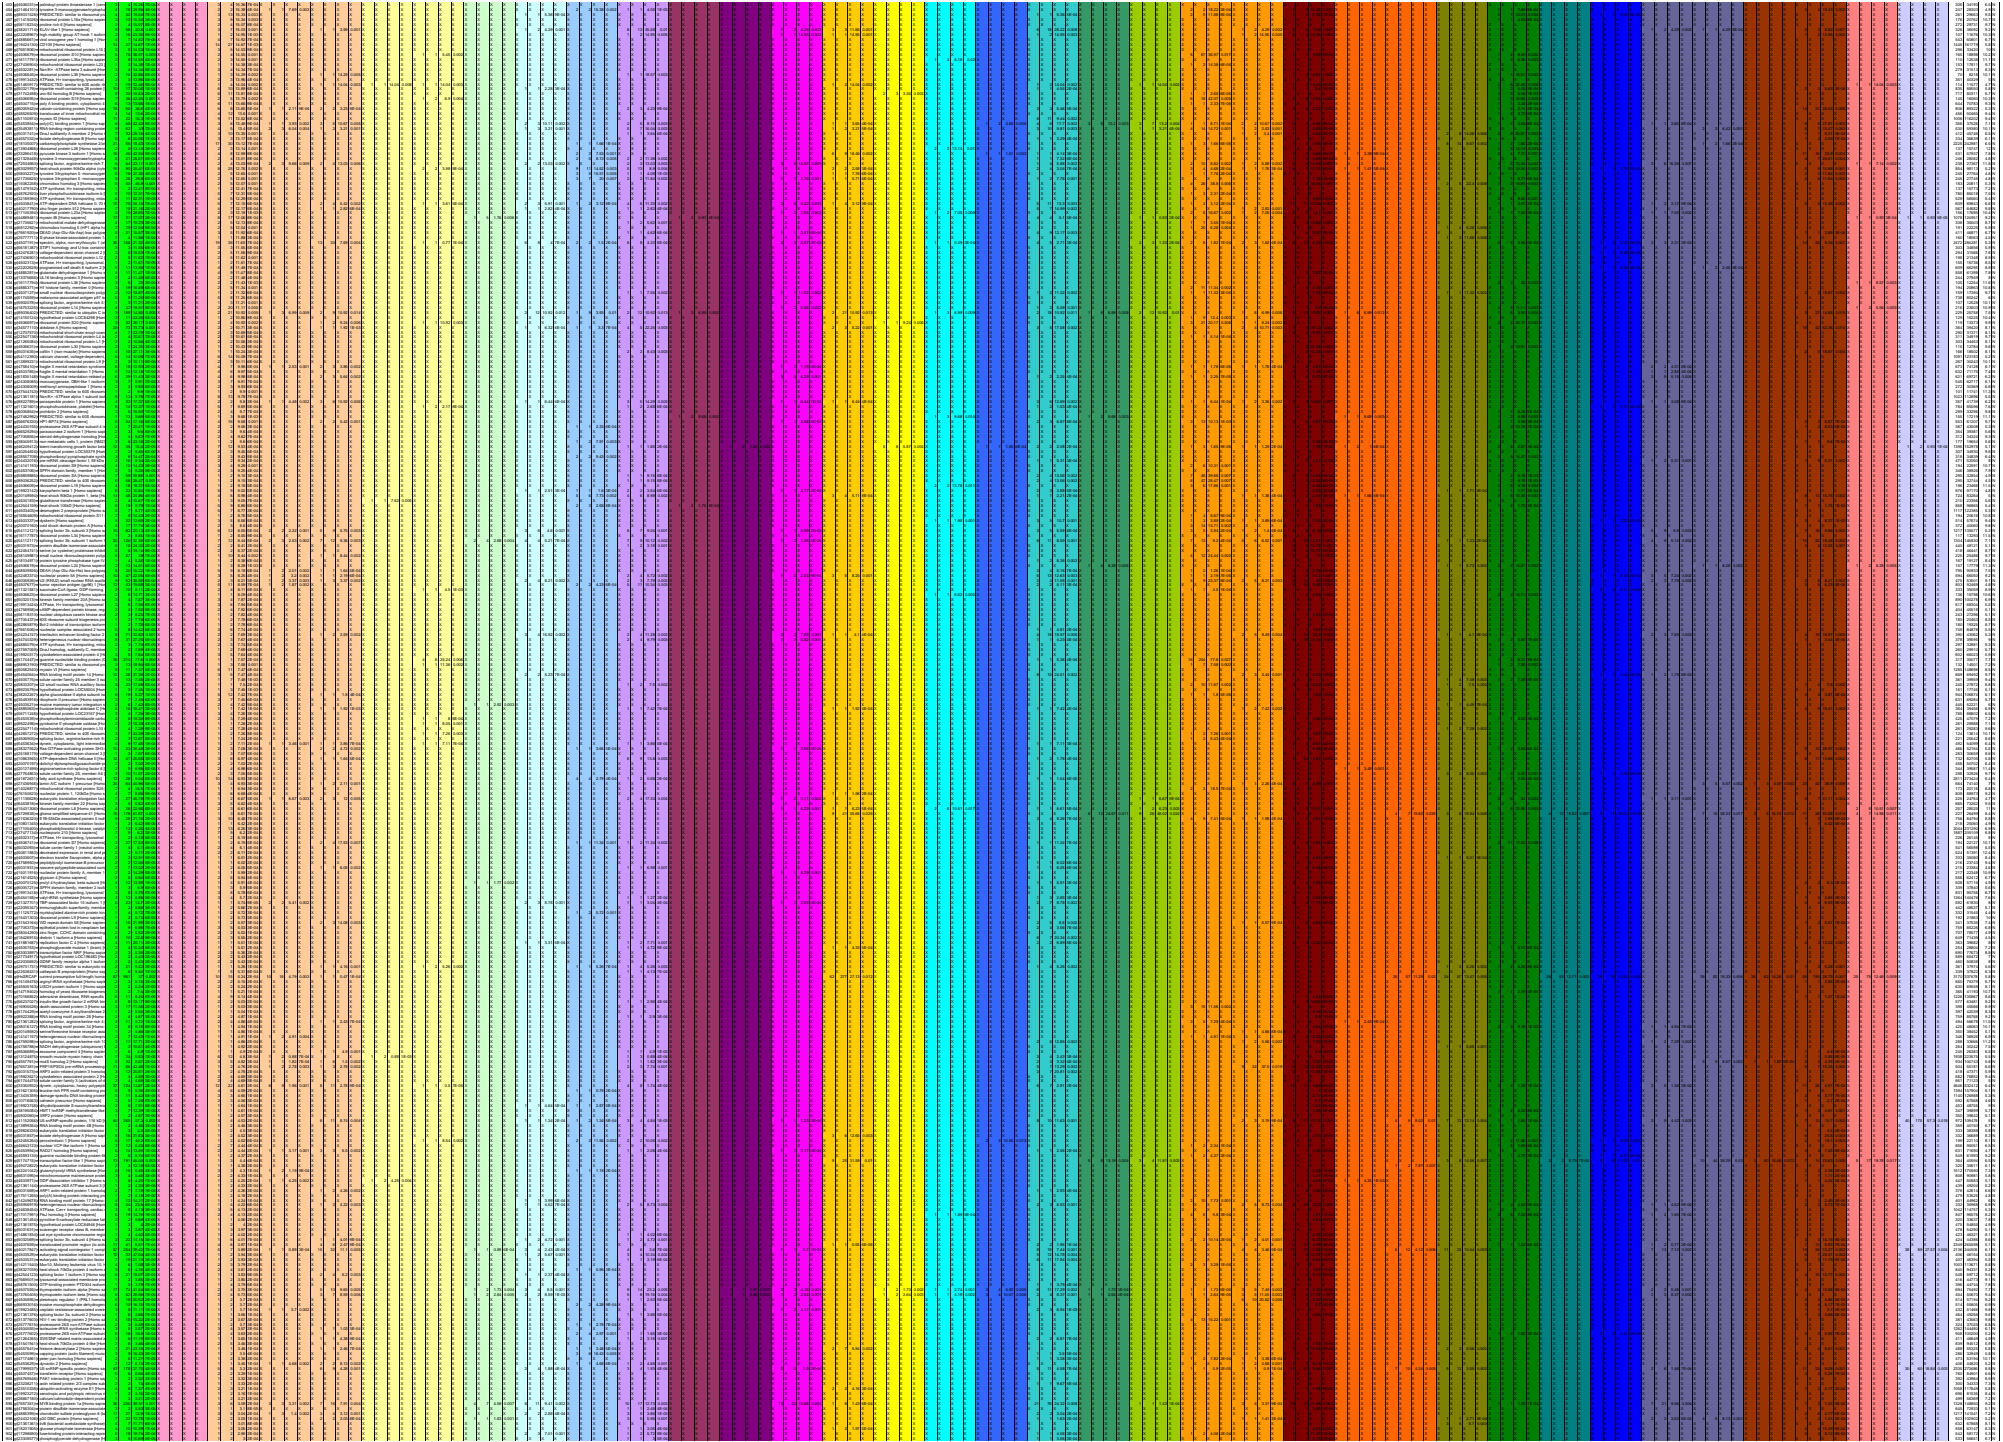

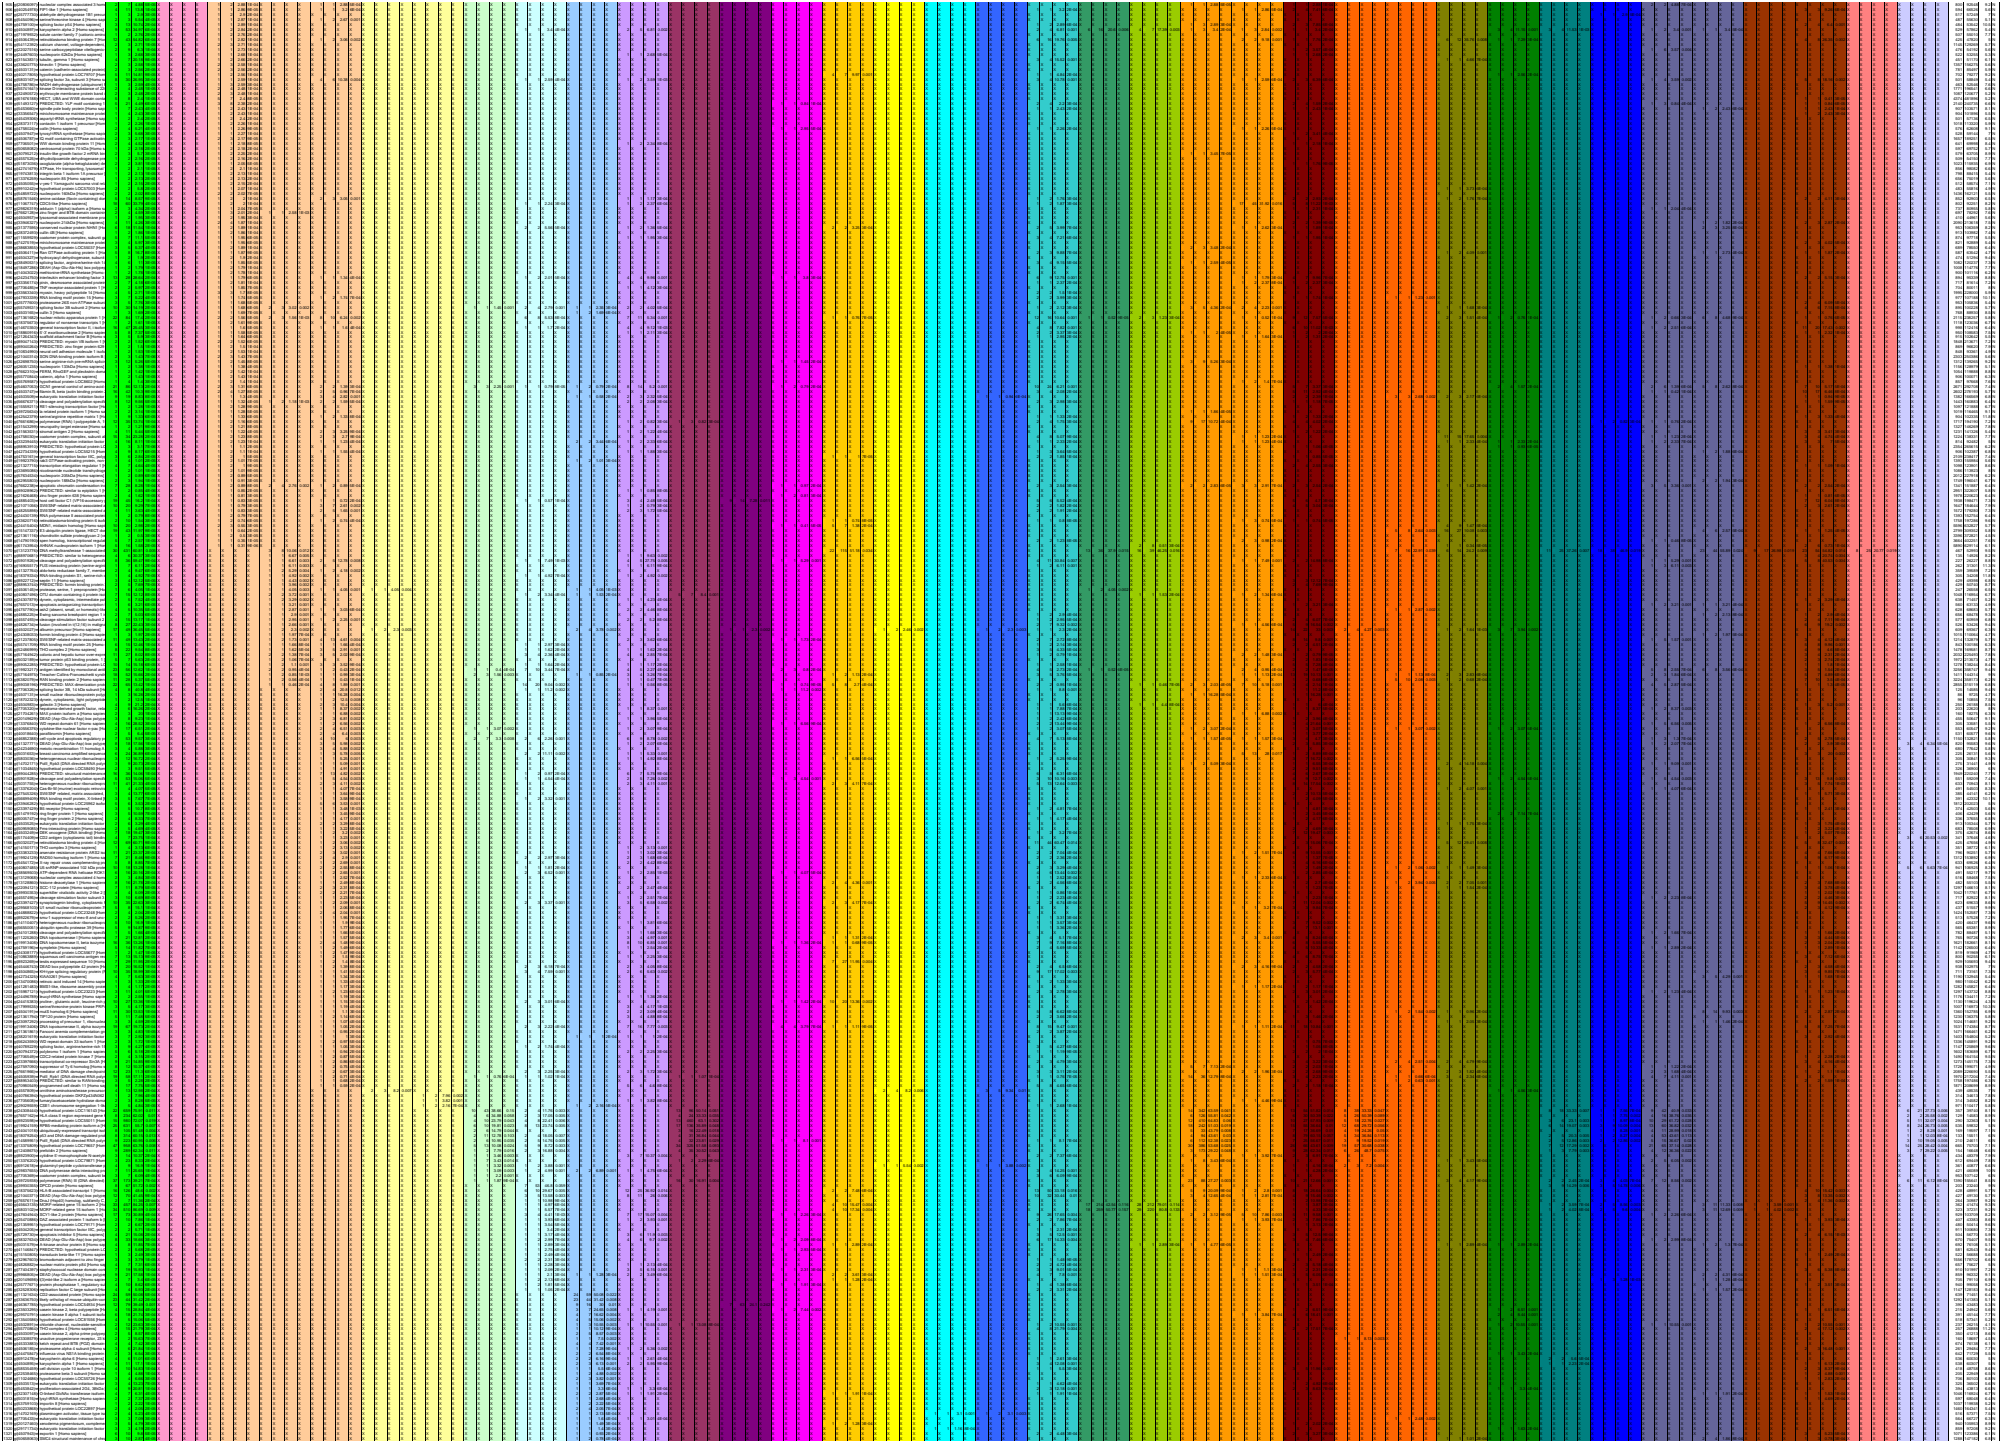

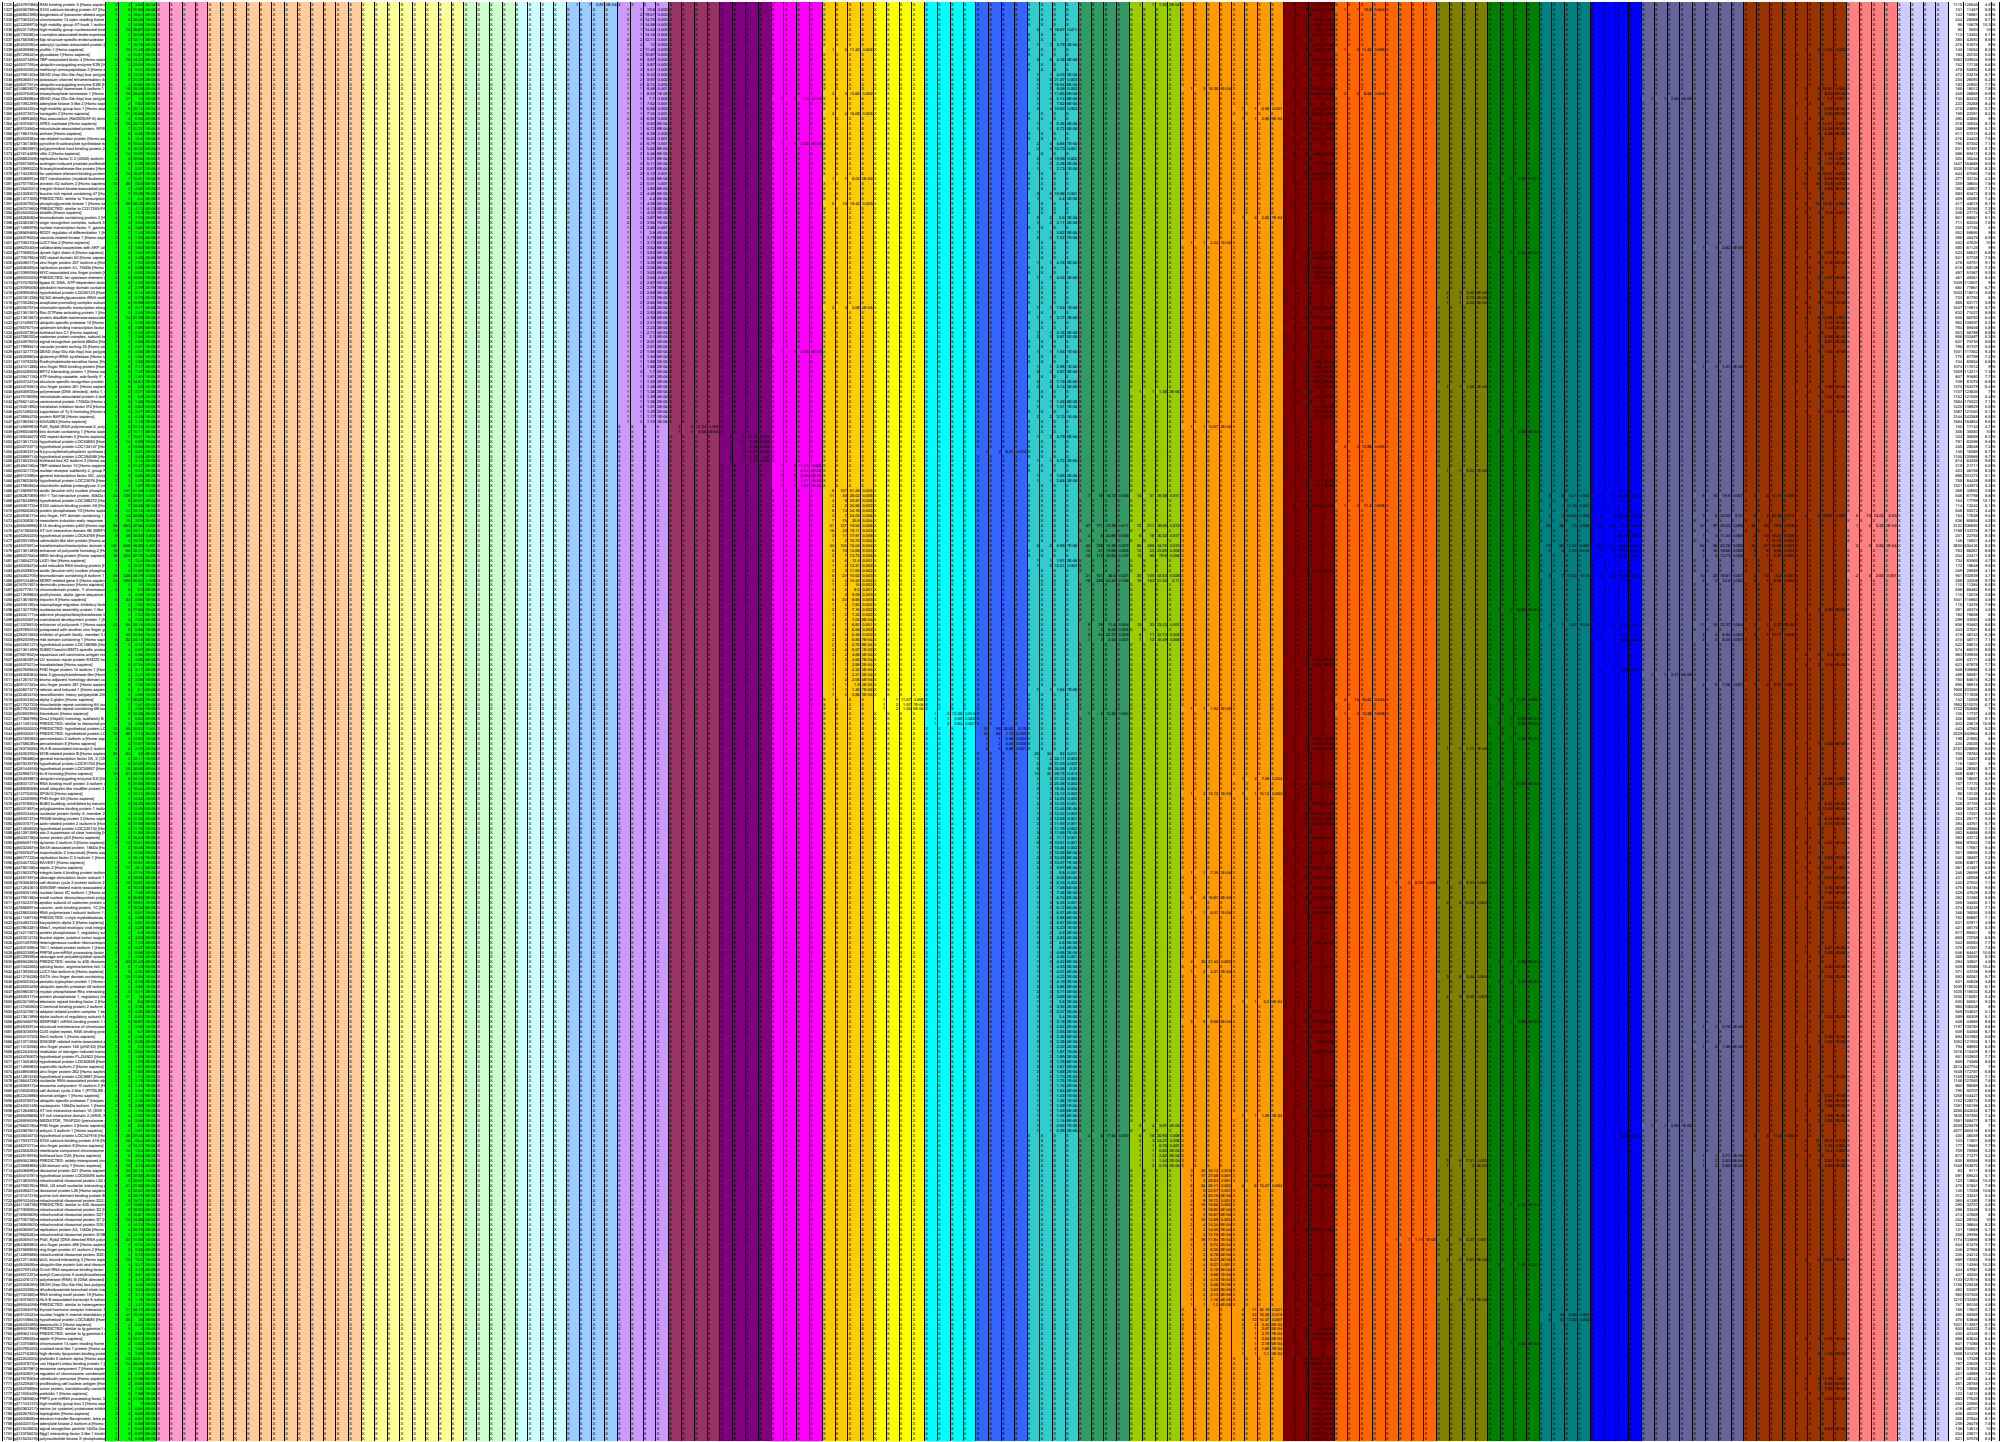



## Supporting Table 1B. Detailed List of Proteins and Peptides Detected in the Combined Human TIP49a/b Dataset.

Proteins with peptides passing the selection criteria described in the table below are listed by decreasing sequence coverage (percent of the protein sequence covered by the detected peptides).

| Criteria Set | Parameter                                | Value       |
|--------------|------------------------------------------|-------------|
|              | Minimum +1 XCorr                         | 1.8         |
|              | Minimum +2 XCorr                         | 2.5         |
|              | Minimum +3 XCorr                         | 3.5         |
|              | Minimum DeltCN                           | 0.08        |
|              | Minimum charge state                     | 1           |
|              | Maximum charge state                     | 3           |
|              | Minimum ion proportion                   | 0           |
|              | Maximum Sp rank                          | 10          |
|              | Minimum Sp score                         | -1          |
|              | Modified peptide inclusion               | Include     |
|              | Tryptic status requirement               | Full        |
|              | Multiple, ambiguous IDs allowed          | FALSE       |
|              | Minimum sequence length                  | 7           |
|              | Maximum sequence length                  | 100         |
|              | Sequence completeness required           | 0           |
|              | Purge duplicate peptides by protein      | XCorr       |
|              | Include only loci with unique peptide    | FALSE       |
|              | Remove subset proteins                   | TRUE        |
|              | Exclude protein names matching           | Contaminant |
|              | Exclude protein descriptions matching    | KERATIN     |
|              | Minimum modified peptides per locus      | 0           |
|              | Minimum redundancy for low coverage loci | 2           |
|              | Minimum peptides per locus               | 2           |

| Locus           | Sequence Count     | Spectrum Count | Sequence Coverage | Length  | MW       | pl             | Description                    |         |               |            |                                    |
|-----------------|--------------------|----------------|-------------------|---------|----------|----------------|--------------------------------|---------|---------------|------------|------------------------------------|
| Unique          | FileName           | XCorr          | DeltCN            | M+H+    | CalcM+H+ | TotalIntensity | SpRank                         | SpScore | IonProportion | Redundancy | Sequence                           |
| gil Flag_peptic |                    | 2              | 26                | 100.00% | 8        | 1013           | 4.3 [FLAG peptide]             |         |               |            |                                    |
|                 | HsFLAG-ARP6_Ti_2   | 2.7459         | 0.104             | 1013.29 | 1013.99  | 6803.8         | 7                              | 644.8   | 71.4          | 25         | -.DYKDDDDK.-                       |
|                 | HsFLAG-KIAA0515_   | 2.8841         | 0.119             | 1014.36 | 1013.99  | 4702.3         | 6                              | 941.5   | 92.9          | 1          | -.DYKDDDDK.-                       |
| gil 5730023 re  |                    | 84             | 4389              | 89.80%  | 463      | 51157          | 5.6 RuvB-like 2 [Homo sapiens] |         |               |            |                                    |
| *               | HsMRGBP-FLAG_Ti    | 1.8186         | 0.142             | 890.79  | 891.021  | 3609.3         | 1                              | 316.5   | 71.4          | 1          | R.IGAHSHIR.G                       |
| *               | HsFLAG-TIP49b_Ti_  | 3.0474         | 0.1734            | 890.87  | 891.021  | 6414.4         | 1                              | 1053.3  | 92.9          | 25         | R.IGAHSHIR.G                       |
| *               | HsFlag-VPS71_Ti_1( | 2.7325         | 0.2286            | 1155.69 | 1156.281 | 3976.7         | 1                              | 535.6   | 70            | 10         | R.GLGLDDALEPR.Q                    |
| *               | HsTIP60_Ti_103.464 | 4.254          | 0.3186            | 1156.26 | 1156.281 | 7541.3         | 1                              | 1864.5  | 90            | 90         | R.GLGLDDALEPR.Q                    |
| *               | HsFLAG-TIP49b_Ti_  | 2.6105         | 0.2844            | 1316.72 | 1317.506 | 2348.3         | 4                              | 89.8    | 50            | 3          | R.QASQGMVGQLAAR.R                  |
| *               | HsFLAG-FLJ20309_   | 4.0269         | 0.3081            | 1317.32 | 1317.506 | 7215.8         | 1                              | 1286.2  | 79.2          | 60         | R.QASQGMVGQLAAR.R                  |
| *               | HsFLAG-TIP49b_Ti_  | 4.08           | 0.2048            | 1215.56 | 1215.5   | 6693.7         | 1                              | 1602.5  | 95            | 151        | R.RAAGVVLEMIR.E                    |
| *               | HsFLAG-TIP49b_Ti_  | 3.3479         | 0.3071            | 1529.44 | 1529.841 | 3206.1         | 1                              | 326.7   | 65.4          | 2          | R.RAAGVVLEMIREGK.I                 |
| *               | HsFlag-ZnF-HIT2_Ti | 4.3047         | 0.2714            | 1530.61 | 1529.841 | 6725.7         | 1                              | 1389.4  | 51.9          | 2          | R.RAAGVVLEMIREGK.I                 |
| *               | HsFLAG-TIP49b_Ti_  | 2.6442         | 0.2624            | 1058.5  | 1059.312 | 6456.9         | 1                              | 482.5   | 66.7          | 15         | R.AAGVVLEMIR.E                     |
| *               | HsFlag-ZnF-HIT2_Ti | 3.7815         | 0.2418            | 1059.45 | 1059.312 | 4722.6         | 1                              | 1144    | 88.9          | 120        | R.AAGVVLEMIR.E                     |
| *               | HsFLAG-TIP49b_Ti_  | 4.202          | 0.3783            | 1372.83 | 1373.654 | 8192.6         | 1                              | 1434.4  | 75            | 17         | R.AAGVVLEMIREGK.I                  |
| *               | HsMRGBP-FLAG_Ti    | 4.9341         | 0.374             | 1511.21 | 1509.792 | 5132           | 1                              | 954.3   | 66.7          | 2          | K.IAGRAVLIAGQPGTGK.T               |
| *               | HsFLAG-ARP8_Ti_2   | 2.9242         | 0.3714            | 1111.63 | 1112.315 | 6215.4         | 1                              | 668.6   | 63.6          | 53         | R.AVLIAGQPGTGK.T                   |
| *               | HsFlag-FLJ90652_2  | 4.0959         | 0.32              | 1112.09 | 1112.315 | 5858.9         | 1                              | 1313.8  | 81.8          | 74         | R.AVLIAGQPGTGK.T                   |
| *               | HsFlag-ZnF-HIT2_Ti | 6.261          | 0.5104            | 3258.78 | 3258.787 | 7949.4         | 1                              | 1126.2  | 29.8          | 50         | K.TAIAMGMAQALGPDPFTAAGSEIFSLEMSK.T |
| *               | HsFLAG-TIP49b_Ti_  | 2.3687         | 0.2152            | 1036.41 | 1037.161 | 4039.4         | 3                              | 258.5   | 68.8          | 5          | K.TEALTQAFR.R                      |
| *               | HsFlag-ZnF-HIT2_Ti | 3.2342         | 0.2096            | 1037.5  | 1037.161 | 5608.2         | 1                              | 814.4   | 81.2          | 13         | K.TEALTQAFR.R                      |
| *               | HsFLAG-TIP49b_Ti_  | 5.5656         | 0.4212            | 2942.56 | 2943.278 | 7919.9         | 1                              | 1194.7  | 46.2          | 192        | R.IKEETEIIIEGEVVEIQIDRPATGTGSK.V   |
| *               | HsFlag-DPCD_Ti_20  | 7.4369         | 0.4233            | 2943.62 | 2943.278 | 8877.3         | 1                              | 1426    | 32.7          | 340        | R.IKEETEIIIEGEVVEIQIDRPATGTGSK.V   |
| *               | HsFlag-ZnF-HIT2_Ti | 2.5973         | 0.1099            | 2701.1  | 2701.945 | 3307.7         | 3                              | 236.5   | 33.3          | 1          | K.EETEIIIEGEVVEIQIDRPATGTGSK.V     |
| *               | HsFlag-ZnF-HIT2_Ti | 2.9512         | 0.3793            | 1501.76 | 1502.677 | 5465.7         | 1                              | 417.1   | 58.3          | 24         | K.TTEMETIYDLGK.M                   |
| *               | HsFlag-VPS71_Ti_1( | 4.6242         | 0.443             | 1502.2  | 1502.677 | 7463.1         | 1                              | 1651.9  | 79.2          | 117        | K.TTEMETIYDLGK.M                   |
| *               | HsFlag-ZnF-HIT2_Ti | 1.9467         | 0.1237            | 821.37  | 822.008  | 6775.1         | 5                              | 519.5   | 83.3          | 1          | K.MIESLTK.D                        |
| *               | HsFLAG-ARP5_Ti_1(  | 5.7887         | 0.3008            | 2561.62 | 2562.982 | 10507.3        | 1                              | 1645.6  | 34.8          | 4          | K.MIESLTKDKVQAGDVITIDKATGK.I       |
| *               | HsFLAG-ARP5_Ti_1(  | 3.3125         | 0.1729            | 1403.24 | 1402.588 | 9198.8         | 1                              | 1419.2  | 75            | 1          | K.DKVQAGDVITIDK.A                  |
| *               | HsFLAG-ARP5_Ti_1(  | 5.4446         | 0.4171            | 1759.45 | 1759.998 | 10924.4        | 1                              | 2173.8  | 68.8          | 3          | K.DKVQAGDVITIDKATGK.I              |
| *               | HsFlag-VPS71_Ti_1( | 2.9973         | 0.204             | 1158.64 | 1159.325 | 12315.5        | 1                              | 1070.8  | 65            | 37         | K.VQAGDVITIDK.A                    |
| *               | HsFlag-NUFIP_Ti_1( | 4.1257         | 0.2235            | 1159.62 | 1159.325 | 3236.9         | 1                              | 805.5   | 90            | 41         | K.VQAGDVITIDK.A                    |
| *               | HsTIP60_Ti_106.189 | 1.9457         | 0.1353            | 1030.62 | 1031.244 | 4311.5         | 2                              | 306.8   | 66.7          | 2          | K.ATGKISKLGR.S                     |
| *               | HsFlag-ZnF-HIT2_Ti | 4.6068         | 0.3683            | 1343.39 | 1343.454 | 6063.3         | 1                              | 1448.7  | 86.4          | 47         | R.ARDYDAMGSQTK.F                   |
| *               | HsFLAG-TIP49a_Ti_  | 3.0182         | 0.3123            | 1115.18 | 1116.188 | 4250.9         | 1                              | 699.3   | 77.8          | 5          | R.DYDAMGSQTK.F                     |
| *               | HsH2AZ-FLAG_293_   | 3.3483         | 0.2553            | 1116.19 | 1116.188 | 6621.8         | 1                              | 1592.5  | 83.3          | 6          | R.DYDAMGSQTK.F                     |
| *               | HsH2AZ-FLAG_293_   | 3.5647         | 0.237             | 1321.22 | 1321.439 | 5358.9         | 1                              | 1099.5  | 85            | 42         | K.FVQCPDGELQK.R                    |



|   |                     |        |        |         |          |         |   |        |      |                                        |
|---|---------------------|--------|--------|---------|----------|---------|---|--------|------|----------------------------------------|
| * | HsFlag-ZnF-HIT2_Ti_ | 2.8879 | 0.128  | 1321.55 | 1321.439 | 8620.1  | 1 | 870.3  | 70   | 14 K.FVQCPDGELQK.R                     |
| * | HsTIP60_Ti_104.144  | 3.5595 | 0.2741 | 1477.3  | 1477.626 | 5713.4  | 1 | 902.5  | 77.3 | 12 K.FVQCPDGELQKR.K                    |
| * | HsFLAG-ARP5_Ti_1    | 3.5053 | 0.2496 | 2076.03 | 2076.36  | 9179.2  | 1 | 1162.9 | 36.8 | 1 R.KEVVHTVSLHEIDVINSR.T               |
| * | HsFLAG-ARP5_Ti_1    | 4.4954 | 0.4429 | 2077.82 | 2076.36  | 9845.7  | 1 | 1841.8 | 64.7 | 1 R.KEVVHTVSLHEIDVINSR.T               |
| * | HsFlag-ZnF-HIT2_Ti_ | 5.4437 | 0.4377 | 1947.19 | 1948.186 | 8124.8  | 1 | 1649.5 | 68.8 | 418 K.EVVHTVSLHEIDVINSR.T              |
| * | HsH2AZ-FLAG_293_    | 5.1341 | 0.3789 | 1948.3  | 1948.186 | 8683.9  | 1 | 2394.8 | 53.1 | 204 K.EVVHTVSLHEIDVINSR.T              |
| * | HsFlag-VPS71_Ti_10  | 5.5333 | 0.428  | 1684.7  | 1684.886 | 6626.4  | 1 | 1964.1 | 80   | 439 R.TQGFLALFSGDTGEIK.S               |
| * | HsH2AZ-FLAG_293_    | 5.348  | 0.3552 | 2156.09 | 2156.4   | 4111.9  | 1 | 1414.1 | 48.7 | 25 R.TQGFLALFSGDTGEIKSEVR.E            |
| * | HsFlag-ZnF-HIT2_Ti_ | 4.9489 | 0.3948 | 2156.68 | 2156.4   | 7289.5  | 1 | 2054.5 | 65.8 | 50 R.TQGFLALFSGDTGEIKSEVR.E            |
| * | HsFlag-ZnF-HIT2_Ti_ | 4.7876 | 0.2395 | 2840.28 | 2840.163 | 6275.5  | 1 | 707.4  | 30   | 4 R.TQGFLALFSGDTGEIKSEVREQINAK.V       |
| * | HsFlag-ZnF-HIT2_Ti_ | 2.9386 | 0.1543 | 1174.11 | 1174.299 | 5382.5  | 1 | 873.2  | 83.3 | 1 K.SEVREQINAK.V                       |
| * | HsFlag-FLJ20643_Ti_ | 3.1319 | 0.1954 | 1104.92 | 1104.208 | 7558    | 9 | 867.1  | 81.2 | 12 K.VAEWREEGK.A                       |
| * | HsFLAG-TIP49b_Ti_   | 6.0692 | 0.3438 | 3450.11 | 3449.943 | 6613.2  | 1 | 922.8  | 28.4 | 1 R.EEGKAEIIPGVLFIDEVHMLDIESFSFLNR.A   |
| * | HsFlag-VPS71_Ti_10  | 4.7333 | 0.3626 | 3005.68 | 3006.486 | 7633.1  | 1 | 883.1  | 42   | 10 K.AEIIPGVLFIDEVHMLDIESFSFLNR.A      |
| * | HsFLAG-TIP49a_Ti_   | 5.2894 | 0.4374 | 1732.51 | 1733.051 | 4493.7  | 1 | 1232.9 | 80   | 48 R.ALESDFMAPVLIMATNR.G               |
| * | HsFlag-ZnF-HIT2_Ti_ | 5.4504 | 0.2815 | 1733.54 | 1733.051 | 10207.2 | 1 | 3305.8 | 56.7 | 13 R.ALESDFMAPVLIMATNR.G               |
| * | HsFLAG-TIP49b_Ti_   | 5.1786 | 0.3925 | 2139.14 | 2139.419 | 5534.9  | 1 | 1976.3 | 54.2 | 20 R.IRGTSYQSPHGIPIDLLDR.L             |
| * | HsFlag-ZnF-HIT2_Ti_ | 4.3602 | 0.3462 | 2140.09 | 2139.419 | 5156.2  | 1 | 593.3  | 52.8 | 10 R.IRGTSYQSPHGIPIDLLDR.L             |
| * | HsFlag-ZnF-HIT2_Ti_ | 4.6718 | 0.4575 | 1869.92 | 1870.072 | 5318.1  | 1 | 1218.9 | 68.8 | 150 R.GTSYQSPHGIPIDLLDR.L              |
| * | HsFLAG-ARP8_Ti_2    | 4.3364 | 0.2699 | 1870.26 | 1870.072 | 6297.4  | 1 | 930.2  | 43.8 | 3 R.GTSYQSPHGIPIDLLDR.L                |
| * | HsFLAG-TIP49b_Ti_   | 6.3494 | 0.426  | 3201.09 | 3202.632 | 10578.6 | 1 | 2841   | 35.7 | 11 R.GTSYQSPHGIPIDLLDRLLIVSTTPYSEK.D   |
| * | HsFLAG-TIP49b_Ti_   | 5.0446 | 0.3167 | 3547.34 | 3546.999 | 8774.2  | 1 | 1079.2 | 26.6 | 8 R.GTSYQSPHGIPIDLLDRLLIVSTTPYSEKDTK.Q |
| * | HsTIP60_Ti_103.310  | 3.8964 | 0.1671 | 1351.1  | 1351.583 | 6414.7  | 1 | 1290.2 | 77.3 | 109 R.LLIVSTTPYSEK.D                   |
| * | HsFlag-FLJ90652_29  | 2.3504 | 0.1836 | 1351.72 | 1351.583 | 5187.7  | 9 | 282.8  | 50   | 6 R.LLIVSTTPYSEK.D                     |
| * | HsFlag-DPCD_Ti_20   | 3.9005 | 0.3785 | 1695.41 | 1695.951 | 5589.8  | 1 | 906.2  | 67.9 | 24 R.LLIVSTTPYSEKDTK.Q                 |
| * | HsFLAG-TIP49b_Ti_   | 5.3901 | 0.4274 | 2446.77 | 2446.611 | 7495    | 1 | 1662.9 | 63.2 | 217 R.IRCEEEDVEMSEDAYTVLTR.I           |
| * | HsFlag-ZnF-HIT2_Ti_ | 4.6837 | 0.2562 | 2447.77 | 2446.611 | 10400.5 | 1 | 1510   | 35.5 | 8 R.IRCEEEDVEMSEDAYTVLTR.I             |
| * | HsFlag-ZnF-HIT2_Ti_ | 5.9352 | 0.475  | 2178.84 | 2177.264 | 8006    | 1 | 3109.9 | 82.4 | 13 R.CEEEDVEMSEDAYTVLTR.I              |
| * | HsFLAG-TIP49a_Ti_   | 2.063  | 0.1974 | 888.78  | 889.04   | 3114    | 3 | 186.8  | 71.4 | 6 R.IGLETSR.Y                          |
| * | HsFLAG-TIP49a_Ti_   | 3.3502 | 0.2685 | 1579.47 | 1579.846 | 2730.2  | 2 | 141.1  | 57.7 | 26 R.YAIQLITAASLVCR.K                  |
| * | HsFlag-ZnF-HIT2_Ti_ | 5.8071 | 0.4006 | 1579.77 | 1579.846 | 8967.4  | 1 | 2469.6 | 84.6 | 374 R.YAIQLITAASLVCR.K                 |
| * | HsFlag-ZnF-HIT2_Ti_ | 4.4493 | 0.2974 | 1579.97 | 1579.846 | 7599.9  | 1 | 1757.6 | 55.8 | 3 R.YAIQLITAASLVCR.K                   |
| * | HsFLAG-TIP49b_Ti_   | 3.5994 | 0.1977 | 1389.54 | 1388.564 | 5220.1  | 1 | 799.3  | 77.3 | 14 K.RKGTEVQVDDIK.R                    |
| * | HsFlag-ZnF-HIT2_Ti_ | 3.7116 | 0.213  | 1544.35 | 1544.751 | 6848.1  | 4 | 1069.6 | 75   | 2 K.RKGTEVQVDDIKR.V                    |
| * | HsFlag-ZnF-HIT2_Ti_ | 2.8789 | 0.2338 | 1231.65 | 1232.376 | 6274.3  | 5 | 699.7  | 65   | 2 R.KGTEVQVDDIK.R                      |
| * | HsYL1_Ti_103.1312.  | 4.2705 | 0.2646 | 1233.05 | 1232.376 | 3689.1  | 6 | 768.7  | 85   | 14 R.KGTEVQVDDIK.R                     |
| * | HsFLAG-TIP49b_Ti_   | 3.5582 | 0.2117 | 1388.63 | 1388.564 | 4933    | 1 | 867.2  | 77.3 | 6 R.KGTEVQVDDIKR.V                     |
| * | HsFlag-ZnF-HIT2_Ti_ | 4.9702 | 0.259  | 1389.26 | 1388.564 | 5769.6  | 1 | 2336.7 | 70.5 | 7 R.KGTEVQVDDIKR.V                     |
| * | HsFLAG-ARP5_Ti_1    | 4.1314 | 0.2275 | 1389.87 | 1388.564 | 7859.3  | 1 | 1890.9 | 81.8 | 22 R.KGTEVQVDDIKR.V                    |
| * | HsFLAG-TIP49b_Ti_   | 3.8749 | 0.2928 | 1104.57 | 1104.202 | 7166.7  | 2 | 1202.6 | 83.3 | 33 K.GTEVQVDDIK.R                      |
| * | HsFLAG-TIP49b_Ti_   | 3.2589 | 0.1651 | 1104.62 | 1104.202 | 9177.7  | 5 | 721.7  | 66.7 | 14 K.GTEVQVDDIK.R                      |
| * | HsFlag-ZnF-HIT2_Ti_ | 2.7725 | 0.2007 | 1259.68 | 1260.39  | 5023    | 7 | 442.7  | 65   | 3 K.GTEVQVDDIKR.V                      |
| * | HsFlag-ZnF-HIT2_Ti_ | 3.8759 | 0.3018 | 1260.27 | 1260.39  | 8227.1  | 2 | 1345.1 | 80   | 10 K.GTEVQVDDIKR.V                     |

|                 |                     |        |        |         |          |                                                            |   |        |      |     |                                       |
|-----------------|---------------------|--------|--------|---------|----------|------------------------------------------------------------|---|--------|------|-----|---------------------------------------|
| *               | HsFLAG-TIP49b_Ti_   | 3.8473 | 0.249  | 1385.06 | 1385.563 | 5885.6                                                     | 1 | 1340.4 | 85   | 126 | K.RVYSLFLDESR.S                       |
| *               | HsFlag-ZnF-HIT2_Ti_ | 3.1282 | 0.1979 | 1228.68 | 1229.375 | 4347                                                       | 1 | 405.7  | 72.2 | 13  | R.VYSLFLDESR.S                        |
| *               | HsFlag-ZnF-HIT2_Ti_ | 4.1784 | 0.2824 | 1229.21 | 1229.375 | 6206.8                                                     | 1 | 1349.5 | 88.9 | 43  | R.VYSLFLDESR.S                        |
| *               | HsFLAG-TIP49a_Ti_   | 3.1815 | 0.3807 | 2255.28 | 2256.535 | 7484.1                                                     | 1 | 849.2  | 52.9 | 1   | R.STQYMKEYQDAFLFNLK.G                 |
| *               | HsFlag-FLJ90652_29  | 3.3551 | 0.2391 | 1516.6  | 1517.678 | 2788.8                                                     | 4 | 221.8  | 59.1 | 20  | K.EYQDAFLFNLK.G                       |
| *               | HsFlag-FLJ90652_29  | 4.2331 | 0.3787 | 1516.9  | 1517.678 | 7559.5                                                     | 1 | 1385.5 | 81.8 | 70  | K.EYQDAFLFNLK.G                       |
| *               | HsFlag-ZnF-HIT2_Ti_ | 5.4717 | 0.4709 | 2238.34 | 2239.415 | 8205.7                                                     | 1 | 1559.2 | 61.1 | 192 | K.EYQDAFLFNLKGETMDTS.-                |
| gij 89067014 re | 10                  | 587    | 89.10% | 55      | 6231     | 6 PREDICTED: similar to RuvB-like protein 1 [Homo sapiens] |   |        |      |     |                                       |
| *               | HsFLAG-TIP49b_Ti_   | 3.4053 | 0.153  | 1588.01 | 1588.888 | 6589.8                                                     | 2 | 611.4  | 53.6 | 3   | K.GYSVQLLTPANLLAK.I                   |
| *               | HsFlag-ZnF-HIT2_Ti_ | 4.3395 | 0.3482 | 1588.85 | 1588.888 | 5736.5                                                     | 1 | 1461.2 | 78.6 | 11  | K.GYSVQLLTPANLLAK.I                   |
| *               | HsFlag-ZnF-HIT2_Ti_ | 2.9069 | 0.1316 | 1004.09 | 1004.128 | 7177.7                                                     | 1 | 974.3  | 87.5 | 2   | K.INGKDSIEK.E                         |
| *               | HsYL1_Ti_106.2439.  | 3.6273 | 0.2529 | 2695.79 | 2694.955 | 7013.3                                                     | 1 | 455.5  | 36.4 | 2   | K.INGKDSIEKEHVEEISELFYDAK.S           |
| *               | HsYL1_Ti_106.2407.  | 4.4451 | 0.3107 | 2695.92 | 2694.955 | 8062.8                                                     | 1 | 1309.4 | 33   | 5   | K.INGKDSIEKEHVEEISELFYDAK.S           |
| *               | HsFLAG-ARP5_Ti_1    | 4.5642 | 0.3039 | 2282.19 | 2282.466 | 8732.6                                                     | 1 | 1462.3 | 41.7 | 4   | K.DSIEKEHVEEISELFYDAK.S               |
| *               | HsFLAG-ARP5_Ti_1    | 5.2945 | 0.411  | 2282.61 | 2282.466 | 9949                                                       | 1 | 1655.3 | 58.3 | 7   | K.DSIEKEHVEEISELFYDAK.S               |
| *               | HsH2AZ-FLAG_293_    | 5.0684 | 0.2221 | 1709.32 | 1709.85  | 6194                                                       | 1 | 1297.4 | 50   | 112 | K.EHVEEISELFYDAK.S                    |
| *               | HsFLAG-TIP49b_Ti_   | 5.2652 | 0.3234 | 1710.45 | 1709.85  | 7449.9                                                     | 1 | 1932   | 80.8 | 436 | K.EHVEEISELFYDAK.S                    |
| *               | HsFLAG-ARP5_Ti_1    | 3.8999 | 0.273  | 1352.8  | 1353.576 | 8316                                                       | 2 | 1259.4 | 80   | 5   | K.ILADQQDKYMK.-                       |
| gij 8922764 re  | 23                  | 224    | 87.70% | 204     | 22417    | 5.8 MRG-binding protein [Homo sapiens]                     |   |        |      |     |                                       |
| *               | HsMRGBP-FLAG_Ti_    | 3.9004 | 0.3112 | 1306.54 | 1306.39  | 4625.3                                                     | 1 | 2204.8 | 92.9 | 2   | -.MGEAEVGGGAAGDK.G                    |
| *               | HsMRGBP-FLAG_Ti_    | 4.1661 | 0.2521 | 3438.57 | 3437.815 | 6819.1                                                     | 1 | 1039.9 | 28.2 | 4   | K.GPGEAATSPAETVVWSPEVEVCLFHAMLGHK.P   |
| *               | HsTIP60_Ti_106.201  | 2.2951 | 0.191  | 1360.59 | 1361.544 | 3207.7                                                     | 4 | 235.5  | 59.1 | 1   | K.FSQNIGRQVPSK.V                      |
| *               | HsMRGBP-FLAG_Ti_    | 3.5328 | 0.2122 | 1361.85 | 1361.544 | 3566.3                                                     | 1 | 707.1  | 81.8 | 3   | K.FSQNIGRQVPSK.V                      |
| *               | HsMRGBP-FLAG_Ti_    | 5.8879 | 0.3969 | 3370.16 | 3370.822 | 8409.8                                                     | 1 | 2602   | 38   | 7   | K.VIWDHLSTMYDMQALHESEILPFPNPER.N      |
| *               | HsTIP60_Ti_106.288  | 3.4313 | 0.2211 | 1585.89 | 1586.828 | 2946.4                                                     | 1 | 220.7  | 58.3 | 8   | R.NFVLPPEIIQEV.R                      |
| *               | HsMRGBP-FLAG_Ti_    | 4.3223 | 0.258  | 1587.88 | 1586.828 | 4300.4                                                     | 2 | 887.2  | 79.2 | 84  | R.NFVLPPEIIQEV.R                      |
| *               | HsMRGBP-FLAG_Ti_    | 4.2543 | 0.2905 | 1902.58 | 1901.17  | 4216.9                                                     | 1 | 1045.6 | 76.7 | 4   | R.NFVLPPEIIQEVREGK.V                  |
| *               | HsMRGBP-FLAG_Ti_    | 4.0814 | 0.298  | 1526.73 | 1526.818 | 8389                                                       | 1 | 1551.7 | 81.8 | 4   | K.VMIEEEMKEEMK.E                      |
| *               | HsMRGBP-FLAG_Ti_    | 5.3502 | 0.3444 | 3641.21 | 3641.973 | 5808.2                                                     | 1 | 790.4  | 28.1 | 20  | K.VMIEEEMKEEMKEDVDPHNGADDVFSSSGSLGK.A |
| *               | HsMRGBP-FLAG_Ti_    | 3.7213 | 0.3414 | 2651.93 | 2651.775 | 3513.1                                                     | 1 | 235.2  | 37.5 | 1   | K.EEMKEDVDPHNGADDVFSSSGSLGK.A         |
| *               | HsTIP60_Ti_105.171  | 4.4053 | 0.4357 | 2133.37 | 2134.177 | 4788.2                                                     | 1 | 910.5  | 62.5 | 5   | K.EDVDPHNGADDVFSSSGSLGK.A             |
| *               | HsMRGBP-FLAG_Ti_    | 4.0861 | 0.2638 | 2135.89 | 2134.177 | 6028.4                                                     | 1 | 742    | 33.8 | 1   | K.EDVDPHNGADDVFSSSGSLGK.A             |
| *               | HsTIP60_Ti_105.070  | 3.7571 | 0.3092 | 2183.36 | 2184.288 | 7379.6                                                     | 1 | 461.2  | 44.7 | 1   | K.SSKDKEKNSSDLGCKEGADK.R              |
| *               | HsTIP60_Ti_106.094  | 4.7789 | 0.2486 | 2624.61 | 2624.837 | 11242.9                                                    | 1 | 1513.3 | 35.2 | 1   | K.SSKDKEKNSSDLGCKEGADKRKR.S           |
| *               | HsMRGBP-FLAG_Ti_    | 2.2835 | 0.2325 | 880.61  | 880.896  | 2731.1                                                     | 1 | 273.8  | 78.6 | 2   | K.NSSDLGCK.E                          |
| *               | HsTIP60_Ti_102.075  | 2.8437 | 0.1929 | 1536.69 | 1537.593 | 4944.6                                                     | 1 | 580.8  | 65.4 | 1   | K.NSSDLGCKEGADKR.K                    |
| *               | HsMRGBP-FLAG_Ti_    | 5.3292 | 0.3909 | 1887.22 | 1888.085 | 7869.1                                                     | 1 | 1111.7 | 55.6 | 9   | R.VTDKVLTRANSNPSSPSAAK.R              |
| *               | HsTIP60_Ti_106.198  | 5.1485 | 0.3419 | 2043.74 | 2044.272 | 8889.8                                                     | 1 | 1142.3 | 52.6 | 2   | R.VTDKVLTRANSNPSSPSAAK.R              |
| *               | HsTIP60_Ti_101.121  | 4.7002 | 0.4239 | 1444.03 | 1444.585 | 5675.4                                                     | 1 | 1146.2 | 75   | 45  | K.VLTANSNPSSPSAAK.R                   |
| *               | HsTIP60_Ti_104.121  | 2.9609 | 0.4192 | 1444.42 | 1444.585 | 6623.5                                                     | 1 | 781.2  | 64.3 | 11  | K.VLTANSNPSSPSAAK.R                   |
| *               | HsTIP60_Ti_106.180  | 3.0939 | 0.2775 | 1599.56 | 1600.772 | 4119                                                       | 1 | 226.1  | 50   | 3   | K.VLTANSNPSSPSAAK.R                   |
| *               | HsTIP60_Ti_106.169  | 3.4701 | 0.287  | 1599.64 | 1600.772 | 4983.6                                                     | 1 | 396    | 53.3 | 5   | K.VLTANSNPSSPSAAK.R                   |
| gij 5803102 re  | 47                  | 510    | 86.70% | 323     | 37231    | 9.2 MORF-related gene 15 isoform 1 [Homo sapiens]          |   |        |      |     |                                       |

|   |                    |        |        |         |          |        |   |        |      |                                    |
|---|--------------------|--------|--------|---------|----------|--------|---|--------|------|------------------------------------|
|   | HsMRGBP-FLAG_Ti    | 3.6925 | 0.2645 | 2294.08 | 2294.581 | 7236.1 | 1 | 960.3  | 55.6 | 1 K.FQEGERVLCFHGPLYEAK.C           |
|   | HsMRGBP-FLAG_Ti    | 3.6801 | 0.2363 | 2295.28 | 2294.581 | 5155.1 | 1 | 828.6  | 37.5 | 2 K.FQEGERVLCFHGPLYEAK.C           |
|   | HsFLAG-TIP49b_Ti   | 3.4994 | 0.2826 | 1547.54 | 1547.803 | 6903.6 | 1 | 997.7  | 66.7 | 3 R.VLCFHGPLYEAK.C                 |
|   | HsMRGBP-FLAG_Ti    | 4.4526 | 0.3423 | 1548.23 | 1547.803 | 6829.3 | 1 | 1393.6 | 79.2 | 16 R.VLCFHGPLYEAK.C                |
|   | HsMRGBP-FLAG_Ti    | 3.5534 | 0.3471 | 1315.45 | 1315.473 | 6280.5 | 1 | 1401   | 88.9 | 3 K.YFIHYSGWNK.N                   |
|   | HsMRGBP-FLAG_Ti    | 3.3498 | 0.2873 | 1317.5  | 1315.473 | 3505.5 | 1 | 339.2  | 72.2 | 5 K.YFIHYSGWNK.N                   |
| * | HsTIP60_Ti_104.222 | 2.2466 | 0.1791 | 1317.5  | 1318.388 | 3543.5 | 3 | 287.6  | 66.7 | 1 K.NWDEWVPESR.V                   |
| * | HsTIP60_Ti_104.221 | 3.582  | 0.2402 | 1318.13 | 1318.388 | 5314.2 | 4 | 1016.6 | 83.3 | 49 K.NWDEWVPESR.V                  |
| * | HsMRGBP-FLAG_Ti    | 3.5524 | 0.0803 | 1659.85 | 1658.854 | 8126.7 | 2 | 1068.1 | 66.7 | 4 K.NWDEWVPESRVLK.Y                |
|   | HsMRGBP-FLAG_Ti    | 2.6927 | 0.084  | 1320.71 | 1321.56  | 5629.3 | 2 | 702.8  | 70   | 2 R.VLKYVDTNLQK.Q                  |
|   | HsMRGBP-FLAG_Ti    | 2.8309 | 0.1953 | 1321.85 | 1321.56  | 4294.8 | 1 | 1220.4 | 85   | 1 R.VLKYVDTNLQK.Q                  |
|   | HsTIP60_Ti_106.195 | 4.1689 | 0.3537 | 1906.78 | 1907.111 | 6949.9 | 1 | 1011.6 | 58.8 | 1 K.ANQEQAEGKMRGAAPGK.K            |
|   | HsMRGBP-FLAG_Ti    | 2.5271 | 0.2356 | 1371.58 | 1371.58  | 5716.6 | 1 | 548.9  | 61.5 | 1 R.GAAPGKKTSGLQKQ.N               |
|   | HsTIP60_Ti_106.110 | 3.4596 | 0.2761 | 1444.35 | 1444.718 | 8672.1 | 1 | 966.3  | 72.7 | 4 K.NVEVKTCKNKQK.T                 |
|   | HsTIP60_Ti_106.179 | 2.6818 | 0.0973 | 2268    | 2268.448 | 6305.6 | 2 | 270.7  | 35.7 | 1 K.QKTPGNGDGGSTSETPQPPRKK.R       |
|   | HsMRGBP-FLAG_Ti    | 4.4989 | 0.5168 | 1757.23 | 1755.795 | 8291.4 | 1 | 1693.3 | 64.7 | 25 K.TPGNGDGGSTSETPQPPR.K          |
|   | HsTIP60_Ti_104.105 | 3.7834 | 0.3354 | 1883.77 | 1883.969 | 8214.8 | 1 | 837.3  | 34.7 | 1 K.TPGNGDGGSTSETPQPPR.K           |
|   | HsMRGBP-FLAG_Ti    | 4.0666 | 0.4613 | 1884.68 | 1883.969 | 7433   | 1 | 679.6  | 50   | 16 K.TPGNGDGGSTSETPQPPR.K          |
|   | HsTIP60_Ti_106.101 | 4.2302 | 0.2704 | 2011.33 | 2012.144 | 8742   | 1 | 1485.7 | 40.8 | 4 K.TPGNGDGGSTSETPQPPRKK.R         |
|   | HsTIP60_Ti_106.102 | 3.0101 | 0.2389 | 2011.54 | 2012.144 | 7630.1 | 1 | 475.4  | 42.1 | 6 K.TPGNGDGGSTSETPQPPRKK.R         |
|   | HsTIP60_Ti_105.171 | 4.8547 | 0.2105 | 1907.75 | 1909.081 | 8648.5 | 2 | 1434.7 | 43.3 | 2 R.ARVDPVENEETFMNR.V              |
|   | HsTIP60_Ti_105.170 | 4.8515 | 0.2822 | 1908.69 | 1909.081 | 3469.3 | 1 | 859.8  | 76.7 | 5 R.ARVDPVENEETFMNR.V              |
|   | HsMRGBP-FLAG_Ti    | 5.0525 | 0.2906 | 2365.19 | 2364.635 | 5280.1 | 1 | 939.6  | 40.8 | 4 R.ARVDPVENEETFMNRVEK.V           |
|   | HsMRGBP-FLAG_Ti    | 4.4689 | 0.3201 | 1682.75 | 1681.814 | 5891.2 | 1 | 996.9  | 76.9 | 29 R.VDPTVENEETFMNR.V              |
|   | HsMRGBP-FLAG_Ti    | 3.978  | 0.2654 | 2138.04 | 2137.369 | 3667.1 | 3 | 263.6  | 50   | 9 R.VDPTVENEETFMNRVEK.V            |
|   | HsMRGBP-FLAG_Ti    | 5.2994 | 0.3888 | 2237.87 | 2239.576 | 3968.2 | 1 | 797.7  | 64.7 | 29 K.IPEELKPWLVDWDLITR.Q           |
|   | HsMRGBP-FLAG_Ti    | 5.972  | 0.2767 | 2240.47 | 2239.576 | 6504.6 | 1 | 1453.8 | 44.1 | 23 K.IPEELKPWLVDWDLITR.Q           |
|   | HsMRGBP-FLAG_Ti    | 4.0056 | 0.378  | 2495.21 | 2495.881 | 4783.6 | 1 | 673.4  | 52.6 | 3 K.IPEELKPWLVDWDLITRQK.Q          |
|   | HsMRGBP-FLAG_Ti    | 4.4484 | 0.237  | 1529.75 | 1529.736 | 6342.4 | 1 | 1662.1 | 86.4 | 6 K.PWLVDWDLITR.Q                  |
|   | HsTIP60_Ti_101.272 | 1.9098 | 0.1413 | 978.59  | 980.195  | 2631.6 | 6 | 209.1  | 71.4 | 1 K.QLFYLPK.K                      |
|   | HsTIP60_Ti_106.231 | 2.8007 | 0.1259 | 1107.48 | 1108.369 | 1961.8 | 1 | 162.9  | 75   | 2 K.QLFYLPAKK.N                    |
|   | HsMRGBP-FLAG_Ti    | 3.7533 | 0.2863 | 1673.28 | 1672.832 | 5382.9 | 1 | 1323.9 | 76.9 | 1 K.KNVDSILEDYANYK.K               |
|   | HsMRGBP-FLAG_Ti    | 5.021  | 0.3066 | 1800.78 | 1801.006 | 8298.7 | 1 | 1615.3 | 71.4 | 4 K.KNVDSILEDYANYK.S               |
|   | HsTIP60_Ti_104.403 | 4.7168 | 0.2931 | 1544.23 | 1544.658 | 6772   | 2 | 1172.3 | 75   | 58 K.NVDSILEDYANYK.K               |
|   | HsMRGBP-FLAG_Ti    | 3.2546 | 0.252  | 1544.64 | 1544.658 | 4804.1 | 1 | 550    | 62.5 | 8 K.NVDSILEDYANYK.K                |
|   | HsTIP60_Ti_106.256 | 4.1615 | 0.2784 | 1673.84 | 1672.832 | 6496   | 1 | 1332.8 | 76.9 | 14 K.NVDSILEDYANYK.S               |
|   | HsTIP60_Ti_106.232 | 4.8411 | 0.3917 | 1921.7  | 1922.102 | 6504.8 | 1 | 1400.4 | 67.6 | 2 R.GNTDNKEYAVNEVVAGIK.E           |
|   | HsMRGBP-FLAG_Ti    | 3.4706 | 0.229  | 1291.59 | 1292.475 | 4128.7 | 2 | 414.9  | 68.2 | 11 K.EYAVNEVVAGIK.E                |
|   | HsTIP60_Ti_103.259 | 3.9686 | 0.3073 | 1292.31 | 1292.475 | 5695.1 | 1 | 1069.2 | 81.8 | 59 K.EYAVNEVVAGIK.E                |
|   | HsMRGBP-FLAG_Ti    | 4.7656 | 0.1574 | 1719.77 | 1720.036 | 6223.4 | 1 | 1626.6 | 84.6 | 21 K.EYFNVMGLTQLLYK.F              |
|   | HsMRGBP-FLAG_Ti    | 6.2804 | 0.383  | 3324.58 | 3323.753 | 7672   | 1 | 1125.3 | 29.5 | 2 K.FERPQYAEILADHPDAPMSQVYGAPHLR.L |
|   | HsMRGBP-FLAG_Ti    | 3.0795 | 0.2746 | 1421.62 | 1422.679 | 7413.3 | 1 | 670.5  | 58.3 | 9 R.IGAMLAYTPLDEK.S                |
|   | HsTIP60_Ti_105.222 | 4.9481 | 0.3579 | 1422.29 | 1422.679 | 6181.6 | 1 | 1429.5 | 83.3 | 30 R.IGAMLAYTPLDEK.S               |

|                    |        |        |         |          |        |                                                                    |        |      |     |                                 |
|--------------------|--------|--------|---------|----------|--------|--------------------------------------------------------------------|--------|------|-----|---------------------------------|
| HsMRGBP-FLAG_Ti    | 4.1157 | 0.3935 | 1661.9  | 1660.997 | 6753.1 | 1                                                                  | 1302.3 | 73.1 | 3   | K.SLALLLNLYLHDFLK.Y             |
| HsMRGBP-FLAG_Ti    | 4.6934 | 0.3976 | 2254.87 | 2255.405 | 4821.5 | 1                                                                  | 614.4  | 50   | 16  | K.NSATLFSASDYEVAPPEYHR.K        |
| HsMRGBP-FLAG_Ti    | 4.2899 | 0.2286 | 2257.48 | 2255.405 | 5306   | 1                                                                  | 862.2  | 39.5 | 6   | K.NSATLFSASDYEVAPPEYHR.K        |
| HsMRGBP-FLAG_Ti    | 4.5169 | 0.4416 | 2382.92 | 2383.579 | 4869.7 | 1                                                                  | 544.7  | 45   | 7   | K.NSATLFSASDYEVAPPEYHRK.A       |
| gij 4506753 re     | 66     | 5441   | 85.10%  | 456      | 50228  | 6.4 TATA binding protein interacting protein 49 kDa [Homo sapiens] |        |      |     |                                 |
| HsFLAG-TIP49b_Ti   | 3.7644 | 0.2317 | 1294.29 | 1294.549 | 6330   | 2                                                                  | 1212.8 | 85   | 1   | -.MKIEEVKSTTK.T                 |
| HsFLAG-FLJ20309_   | 3.0135 | 0.1418 | 879.39  | 879.007  | 5761.9 | 1                                                                  | 1030.6 | 92.9 | 26  | R.IASHSHVK.G                    |
| HsTIP60_Ti_102.180 | 2.7619 | 0.2823 | 1059.38 | 1060.192 | 9272.9 | 1                                                                  | 1073.1 | 75   | 21  | K.GLGLDESLAK.Q                  |
| HsFlag-FLJ20643_Ti | 3.4732 | 0.2135 | 1060.94 | 1060.192 | 5294   | 2                                                                  | 974.6  | 85   | 36  | K.GLGLDESLAK.Q                  |
| HsFLAG-ARP8_Ti_2   | 2.3985 | 0.2171 | 1301.48 | 1301.402 | 1693.2 | 1                                                                  | 80.1   | 58.3 | 2   | K.QAASGLVGQENAR.E               |
| HsFlag-FLJ90652_2  | 4.1807 | 0.3411 | 1302.45 | 1301.402 | 5603.1 | 1                                                                  | 1211.4 | 83.3 | 39  | K.QAASGLVGQENAR.E               |
| HsFlag-VPS71_Ti_10 | 3.2303 | 0.227  | 2513.34 | 2513.82  | 8076.3 | 1                                                                  | 574.5  | 41.3 | 2   | K.QAASGLVGQENAREACGVIVELIK.S    |
| HsFlag-ZnF-HIT2_Ti | 3.8758 | 0.4002 | 2513.51 | 2513.82  | 6533   | 1                                                                  | 851.1  | 33.7 | 1   | K.QAASGLVGQENAREACGVIVELIK.S    |
| HsFlag-VPS71_Ti_10 | 3.1115 | 0.1457 | 1230.73 | 1231.441 | 5422.2 | 5                                                                  | 554.2  | 70   | 10  | R.EACGVIVELIK.S                 |
| HsFlag-NUFIP_Ti_10 | 3.3651 | 0.1491 | 1232.62 | 1231.441 | 5111   | 4                                                                  | 762.6  | 80   | 202 | R.EACGVIVELIK.S                 |
| HsFLAG-UTX1_Ti_20  | 2.9797 | 0.4321 | 1080.36 | 1081.301 | 6033.2 | 1                                                                  | 1063.8 | 77.3 | 95  | R.AVLLAGPPGTGK.T                |
| HsFLAG-p53-DNA-D   | 3.6323 | 0.1834 | 1080.56 | 1081.301 | 5572.9 | 7                                                                  | 948.5  | 72.7 | 38  | R.AVLLAGPPGTGK.T                |
| HsFLAG-ARP8_Ti_2   | 5.5641 | 0.3332 | 1386.17 | 1386.632 | 9061.9 | 1                                                                  | 2693.9 | 84.6 | 601 | K.TALALAIQELGSK.V               |
| HsFLAG-TIP49a_Ti   | 3.9239 | 0.2681 | 1386.48 | 1386.632 | 6365.2 | 1                                                                  | 710.9  | 61.5 | 95  | K.TALALAIQELGSK.V               |
| HsFLAG-ARP6_Ti_2   | 4.7951 | 0.4599 | 1943.24 | 1944.216 | 4198.1 | 1                                                                  | 1202.3 | 78.1 | 152 | K.VPFCPMVGSEVYSTEIK.K           |
| HsFlag-ZnF-HIT2_Ti | 4.756  | 0.4779 | 2071    | 2072.39  | 6054.6 | 1                                                                  | 1602.5 | 73.5 | 18  | K.VPFCPMVGSEVYSTEIKK.T          |
| HsFlag-ZnF-HIT2_Ti | 5.0154 | 0.3952 | 2072.24 | 2072.39  | 6914   | 1                                                                  | 1586.8 | 47.1 | 10  | K.VPFCPMVGSEVYSTEIKK.T          |
| HsFlag-ZnF-HIT2_Ti | 4.8331 | 0.4032 | 3192.11 | 3192.679 | 6214.5 | 1                                                                  | 956.1  | 33.7 | 1   | K.VPFCPMVGSEVYSTEIKKTEVLMENFR.R |
| HsFLAG-TIP49b_Ti   | 4.1361 | 0.2625 | 1267.41 | 1267.486 | 6497.9 | 1                                                                  | 1311.6 | 88.9 | 74  | K.KTEVLMENFR.R                  |
| HsFLAG-TIP49b_Ti   | 2.9972 | 0.1299 | 1269.5  | 1267.486 | 4703.7 | 1                                                                  | 328    | 66.7 | 40  | K.KTEVLMENFR.R                  |
| HsFlag-ZnF-HIT2_Ti | 3.3579 | 0.1554 | 1423.5  | 1423.673 | 7345.3 | 1                                                                  | 995.7  | 80   | 2   | K.KTEVLMENFR.R                  |
| HsFLAG-TIP49b_Ti   | 2.8243 | 0.2487 | 1138.42 | 1139.312 | 5653.5 | 1                                                                  | 428.1  | 68.8 | 9   | K.TEVLMENFR.R                   |
| HsTIP60_Ti_103.194 | 2.982  | 0.2394 | 1139    | 1139.312 | 6432.3 | 2                                                                  | 1164   | 87.5 | 2   | K.TEVLMENFR.R                   |
| HsFlag-ZnF-HIT2_Ti | 5.4639 | 0.3864 | 2690.49 | 2690.858 | 4649.6 | 1                                                                  | 627.3  | 47.8 | 174 | K.EVYEGEVTETLTPCETENPMGGYGK.T   |
| HsFLAG-ARP8_Ti_2   | 2.9975 | 0.3149 | 1082.58 | 1081.344 | 5439.2 | 1                                                                  | 856.2  | 83.3 | 84  | K.TISHVIIGLK.T                  |
| HsFlag-ZnF-HIT2_Ti | 2.97   | 0.1867 | 1082.64 | 1081.344 | 4841.9 | 1                                                                  | 700    | 77.8 | 73  | K.TISHVIIGLK.T                  |
| HsFlag-ZnF-HIT2_Ti | 4.445  | 0.2048 | 1646.08 | 1646.924 | 4451.1 | 1                                                                  | 927.7  | 51.9 | 16  | K.QLKLDPISIFESLQK.E             |
| HsH2AZ-FLAG_293    | 3.0978 | 0.23   | 1646.43 | 1646.924 | 3939.5 | 1                                                                  | 413.8  | 65.4 | 8   | K.QLKLDPISIFESLQK.E             |
| HsFLAG-p53-DNA-D   | 2.618  | 0.2579 | 1276.7  | 1277.46  | 2958.2 | 1                                                                  | 317.5  | 65   | 7   | K.LDPSIFESLQK.E                 |
| HsFlag-ZnF-HIT2_Ti | 4.4699 | 0.2878 | 1277.13 | 1277.46  | 6174.4 | 1                                                                  | 1226.6 | 85   | 51  | K.LDPSIFESLQK.E                 |
| HsFlag-ZnF-HIT2_Ti | 7.0787 | 0.5505 | 2020.39 | 2021.235 | 7362.1 | 1                                                                  | 2930.8 | 80.6 | 685 | K.ERVEAGDVIYIEANSGAVK.R         |
| HsFlag-DPCD_Ti_20  | 5.6078 | 0.3406 | 2020.89 | 2021.235 | 8149.8 | 1                                                                  | 1761.9 | 41.7 | 258 | K.ERVEAGDVIYIEANSGAVK.R         |
| HsFLAG-ARP5_Ti_10  | 4.9899 | 0.2613 | 2176.96 | 2177.422 | 8457.9 | 1                                                                  | 1468.6 | 40.8 | 3   | K.ERVEAGDVIYIEANSGAVKR.Q        |
| HsFlag-DPCD_Ti_20  | 5.262  | 0.4923 | 1736.64 | 1735.932 | 6005.2 | 1                                                                  | 1383.5 | 68.8 | 26  | R.VEAGDVIYIEANSGAVK.R           |
| HsFlag-ZnF-HIT2_Ti | 4.1501 | 0.267  | 2391.51 | 2391.556 | 4705.4 | 1                                                                  | 971.4  | 43.4 | 2   | R.CDYATEFDLEAEYVPLPK.G          |
| HsFlag-DPCD_Ti_20  | 6.884  | 0.4827 | 2392.04 | 2391.556 | 9046.3 | 1                                                                  | 2363.5 | 65.8 | 751 | R.CDYATEFDLEAEYVPLPK.G          |
| HsH2AZ-FLAG_293    | 4.9951 | 0.4147 | 1922.11 | 1923.133 | 7254.1 | 1                                                                  | 1433.3 | 68.8 | 13  | K.EIQDVTLHDLVDVANAR.P           |
| HsFlag-ZnF-HIT2_Ti | 3.9724 | 0.2325 | 1923.47 | 1923.133 | 7884   | 1                                                                  | 1595   | 45.3 | 2   | K.EIQDVTLHDLVDVANAR.P           |

|               |                     |        |        |         |          |         |   |                                                   |      |     |                                          |  |
|---------------|---------------------|--------|--------|---------|----------|---------|---|---------------------------------------------------|------|-----|------------------------------------------|--|
|               | HsFLAG-TIP49a_Ti_   | 6.494  | 0.4369 | 3638.48 | 3639.195 | 7117.6  | 1 | 1475.9                                            | 32.8 | 85  | K.EIIQDVTLHDLVDVANARPQGGQDILSMMGQLMK.P   |  |
|               | HsFlag-VPS71_Ti_1C  | 7.167  | 0.3672 | 3863.76 | 3864.485 | 8246.8  | 1 | 1384.8                                            | 28.7 | 112 | K.EIIQDVTLHDLVDVANARPQGGQDILSMMGQLMKPK.K |  |
|               | HsFlag-ZnF-HIT2_Ti_ | 4.2516 | 0.3154 | 1734.32 | 1735.085 | 7584    | 1 | 1271.6                                            | 66.7 | 3   | R.PQGGQDILSMMGQLMK.P                     |  |
|               | HsFLAG-TIP49a_Ti_   | 5.416  | 0.3829 | 1959.7  | 1960.375 | 7011.4  | 1 | 1214.5                                            | 61.8 | 2   | R.PQGGQDILSMMGQLMKPK.K                   |  |
|               | HsFLAG-TIP49a_Ti_   | 5.7179 | 0.3974 | 1962.73 | 1960.375 | 4367    | 1 | 1299.3                                            | 51.5 | 8   | R.PQGGQDILSMMGQLMKPK.K                   |  |
|               | HsFLAG-TIP49b_Ti_   | 3.9521 | 0.1276 | 3794.93 | 3794.323 | 4685.7  | 1 | 369.5                                             | 23.4 | 2   | K.YIDQGIAELVPGVLFVDEVHMLDIECFYLHR.A      |  |
|               | HsFlag-NUFIP_Ti_1C  | 6.0975 | 0.4225 | 1689.03 | 1688.965 | 10187.6 | 1 | 3157.2                                            | 56.7 | 102 | R.ALESSIAPIVIFASNR.G                     |  |
|               | HsFlag-NUFIP_Ti_1C  | 4.9148 | 0.4132 | 1689.58 | 1688.965 | 4604.7  | 1 | 762.8                                             | 66.7 | 125 | R.ALESSIAPIVIFASNR.G                     |  |
|               | HsFlag-DPCD_Ti_20   | 4.5205 | 0.2042 | 1949.21 | 1950.156 | 5235.7  | 1 | 1784.1                                            | 51.5 | 45  | R.GTEDITSPHGIPLDLLDR.V                   |  |
|               | HsFLAG-FLJ20309_    | 4.7346 | 0.33   | 1950.04 | 1950.156 | 6887.2  | 1 | 1385.1                                            | 64.7 | 131 | R.GTEDITSPHGIPLDLLDR.V                   |  |
|               | HsFLAG-ARP5_Ti_1    | 4.152  | 0.283  | 2563.06 | 2562.987 | 6064.4  | 1 | 762.7                                             | 34.1 | 3   | R.GTEDITSPHGIPLDLLDRVMIIR.T              |  |
|               | HsFlag-ZnF-HIT2_Ti_ | 3.2731 | 0.2494 | 1242.15 | 1242.491 | 5558.9  | 1 | 1038.7                                            | 83.3 | 12  | R.TMLYTPQEMK.Q                           |  |
|               | HsTIP60_Ti_103.171  | 1.9921 | 0.2233 | 1242.44 | 1242.491 | 4660.1  | 5 | 301.6                                             | 61.1 | 2   | R.TMLYTPQEMK.Q                           |  |
| *             | HsFlag-ZnF-HIT2_Ti_ | 5.7078 | 0.5012 | 2594.22 | 2594.885 | 10246.8 | 1 | 1151.5                                            | 45.7 | 16  | K.IRAQTEGINISEEALNHLGEIGTK.T             |  |
| *             | HsFlag-ZnF-HIT2_Ti_ | 7.7226 | 0.446  | 2594.6  | 2594.885 | 8598.1  | 1 | 2773.9                                            | 44.6 | 48  | K.IRAQTEGINISEEALNHLGEIGTK.T             |  |
| *             | HsFlag-ZnF-HIT2_Ti_ | 5.5352 | 0.4772 | 2324.79 | 2325.538 | 6562.1  | 1 | 869.2                                             | 50   | 215 | R.AQTEGINISEEALNHLGEIGTK.T               |  |
| *             | HsFLAG-FLJ20309_    | 4.2899 | 0.2341 | 2326.96 | 2325.538 | 3826.3  | 1 | 421.2                                             | 31   | 17  | R.AQTEGINISEEALNHLGEIGTK.T               |  |
| *             | HsFLAG-TIP49a_Ti_   | 4.6355 | 0.4058 | 2003.69 | 2003.393 | 5278.2  | 1 | 759.7                                             | 52.9 | 7   | K.TTLRYSVQLLTPANLLAK.I                   |  |
|               | HsFLAG-ARP6_Ti_1    | 4.4489 | 0.337  | 1532.19 | 1531.836 | 5640.9  | 1 | 993.6                                             | 73.1 | 244 | R.YSVQLLTPANLLAK.I                       |  |
|               | HsFLAG-TIP49b_Ti_   | 4.0508 | 0.3027 | 1532.79 | 1531.836 | 6673.1  | 1 | 538.8                                             | 53.8 | 59  | R.YSVQLLTPANLLAK.I                       |  |
|               | HsFlag-ZnF-HIT2_Ti_ | 2.9069 | 0.1316 | 1004.09 | 1004.128 | 7177.7  | 1 | 974.3                                             | 87.5 | 2   | K.INGKDSIEK.E                            |  |
|               | HsYL1_Ti_106.2439.  | 3.6273 | 0.2529 | 2695.79 | 2694.955 | 7013.3  | 1 | 455.5                                             | 36.4 | 2   | K.INGKDSIEKEHVEEISELFYDAK.S              |  |
|               | HsYL1_Ti_106.2407.  | 4.4451 | 0.3107 | 2695.92 | 2694.955 | 8062.8  | 1 | 1309.4                                            | 33   | 5   | K.INGKDSIEKEHVEEISELFYDAK.S              |  |
|               | HsFLAG-ARP5_Ti_1    | 4.5642 | 0.3039 | 2282.19 | 2282.466 | 8732.6  | 1 | 1462.3                                            | 41.7 | 4   | K.DSIEKEHVEEISELFYDAK.S                  |  |
|               | HsFLAG-ARP5_Ti_1    | 5.2945 | 0.411  | 2282.61 | 2282.466 | 9949    | 1 | 1655.3                                            | 58.3 | 7   | K.DSIEKEHVEEISELFYDAK.S                  |  |
|               | HsH2AZ-FLAG_293_    | 5.0684 | 0.2221 | 1709.32 | 1709.85  | 6194    | 1 | 1297.4                                            | 50   | 112 | K.EHVEEISELFYDAK.S                       |  |
|               | HsFLAG-TIP49b_Ti_   | 5.2652 | 0.3234 | 1710.45 | 1709.85  | 7449.9  | 1 | 1932                                              | 80.8 | 436 | K.EHVEEISELFYDAK.S                       |  |
|               | HsFLAG-ARP5_Ti_1    | 3.8999 | 0.273  | 1352.8  | 1353.576 | 8316    | 2 | 1259.4                                            | 80   | 5   | K.ILADQQDKYMK.-                          |  |
| gij45643135 r |                     | 45     | 457    | 84.30%  | 362      | 41474   |   | 9.3 MORF-related gene 15 isoform 2 [Homo sapiens] |      |     |                                          |  |
|               | HsMRGBP-FLAG_Ti_    | 3.6925 | 0.2645 | 2294.08 | 2294.581 | 7236.1  | 1 | 960.3                                             | 55.6 | 1   | K.FQGERVLCFHGPLYEAK.C                    |  |
|               | HsMRGBP-FLAG_Ti_    | 3.6801 | 0.2363 | 2295.28 | 2294.581 | 5155.1  | 1 | 828.6                                             | 37.5 | 2   | K.FQGERVLCFHGPLYEAK.C                    |  |
|               | HsFLAG-TIP49b_Ti_   | 3.4994 | 0.2826 | 1547.54 | 1547.803 | 6903.6  | 1 | 997.7                                             | 66.7 | 3   | R.VLCFHGPLYEAK.C                         |  |
|               | HsMRGBP-FLAG_Ti_    | 4.4526 | 0.3423 | 1548.23 | 1547.803 | 6829.3  | 1 | 1393.6                                            | 79.2 | 16  | R.VLCFHGPLYEAK.C                         |  |
|               | HsMRGBP-FLAG_Ti_    | 3.5534 | 0.3471 | 1315.45 | 1315.473 | 6280.5  | 1 | 1401                                              | 88.9 | 3   | K.YFIHYSGWNK.K                           |  |
|               | HsMRGBP-FLAG_Ti_    | 3.3498 | 0.2873 | 1317.5  | 1315.473 | 3505.5  | 1 | 339.2                                             | 72.2 | 5   | K.YFIHYSGWNK.K                           |  |
| *             | HsMRGBP-FLAG_Ti_    | 3.867  | 0.241  | 3936.37 | 3937.36  | 4959.8  | 1 | 563.3                                             | 25   | 1   | K.THEDIVALFPVPEGAPSVHHPLLTSSWDEWVPE.SR.V |  |
|               | HsMRGBP-FLAG_Ti_    | 2.6927 | 0.084  | 1320.71 | 1321.56  | 5629.3  | 2 | 702.8                                             | 70   | 2   | R.VLKYVDTNLQK.Q                          |  |
|               | HsMRGBP-FLAG_Ti_    | 2.8309 | 0.1953 | 1321.85 | 1321.56  | 4294.8  | 1 | 1220.4                                            | 85   | 1   | R.VLKYVDTNLQK.Q                          |  |
|               | HsTIP60_Ti_106.195  | 4.1689 | 0.3537 | 1906.78 | 1907.111 | 6949.9  | 1 | 1011.6                                            | 58.8 | 1   | K.ANQEQAEGKMRGAAPGK.K                    |  |
|               | HsMRGBP-FLAG_Ti_    | 2.5271 | 0.2356 | 1371.58 | 1371.58  | 5716.6  | 1 | 548.9                                             | 61.5 | 1   | R.GAAPGKKTSGLQK.N                        |  |
|               | HsTIP60_Ti_106.110  | 3.4596 | 0.2761 | 1444.35 | 1444.718 | 8672.1  | 1 | 966.3                                             | 72.7 | 4   | K.NVEVKTKKNKQK.T                         |  |
|               | HsTIP60_Ti_106.179  | 2.6818 | 0.0973 | 2268    | 2268.448 | 6305.6  | 2 | 270.7                                             | 35.7 | 1   | K.QKTPGNGDGGSTSETPQPPRKK.R               |  |
|               | HsMRGBP-FLAG_Ti_    | 4.4989 | 0.5168 | 1757.23 | 1755.795 | 8291.4  | 1 | 1693.3                                            | 64.7 | 25  | K.TPGNGDGGSTSETPQPPR.K                   |  |

|                      |        |        |         |          |        |   |        |      |    |                                                                                              |
|----------------------|--------|--------|---------|----------|--------|---|--------|------|----|----------------------------------------------------------------------------------------------|
| HsTIP60_Ti_104.105   | 3.7834 | 0.3354 | 1883.77 | 1883.969 | 8214.8 | 1 | 837.3  | 34.7 | 1  | K.TPGNGDGGSTSETPQPPRK.K                                                                      |
| HsMRGBP-FLAG_Ti      | 4.0666 | 0.4613 | 1884.68 | 1883.969 | 7433   | 1 | 679.6  | 50   | 16 | K.TPGNGDGGSTSETPQPPRK.K                                                                      |
| HsTIP60_Ti_106.101   | 4.2302 | 0.2704 | 2011.33 | 2012.144 | 8742   | 1 | 1485.7 | 40.8 | 4  | K.TPGNGDGGSTSETPQPPRKK.R                                                                     |
| HsTIP60_Ti_106.102   | 3.0101 | 0.2389 | 2011.54 | 2012.144 | 7630.1 | 1 | 475.4  | 42.1 | 6  | K.TPGNGDGGSTSETPQPPRKK.R                                                                     |
| HsTIP60_Ti_105.171   | 4.8547 | 0.2105 | 1907.75 | 1909.081 | 8648.5 | 2 | 1434.7 | 43.3 | 2  | R.ARVDPTVENEETFMNR.V                                                                         |
| HsTIP60_Ti_105.170   | 4.8515 | 0.2822 | 1908.69 | 1909.081 | 3469.3 | 1 | 859.8  | 76.7 | 5  | R.ARVDPTVENEETFMNR.V                                                                         |
| HsMRGBP-FLAG_Ti      | 5.0525 | 0.2906 | 2365.19 | 2364.635 | 5280.1 | 1 | 939.6  | 40.8 | 4  | R.ARVDPTVENEETFMNRVEVK.V                                                                     |
| HsMRGBP-FLAG_Ti      | 4.4689 | 0.3201 | 1682.75 | 1681.814 | 5891.2 | 1 | 996.9  | 76.9 | 29 | R.VDPTVENEETFMNR.V                                                                           |
| HsMRGBP-FLAG_Ti      | 3.978  | 0.2654 | 2138.04 | 2137.369 | 3667.1 | 3 | 263.6  | 50   | 9  | R.VDPTVENEETFMNRVEVK.V                                                                       |
| HsMRGBP-FLAG_Ti      | 5.2994 | 0.3888 | 2237.87 | 2239.576 | 3968.2 | 1 | 797.7  | 64.7 | 29 | K.IPEELKPWLVDWDLITR.Q                                                                        |
| HsMRGBP-FLAG_Ti      | 5.972  | 0.2767 | 2240.47 | 2239.576 | 6504.6 | 1 | 1453.8 | 44.1 | 23 | K.IPEELKPWLVDWDLITR.Q                                                                        |
| HsMRGBP-FLAG_Ti      | 4.0056 | 0.378  | 2495.21 | 2495.881 | 4783.6 | 1 | 673.4  | 52.6 | 3  | K.IPEELKPWLVDWDLITRQK.Q                                                                      |
| HsMRGBP-FLAG_Ti      | 4.4484 | 0.237  | 1529.75 | 1529.736 | 6342.4 | 1 | 1662.1 | 86.4 | 6  | K.PWLVDWDLITR.Q                                                                              |
| HsTIP60_Ti_101.272   | 1.9098 | 0.1413 | 978.59  | 980.195  | 2631.6 | 6 | 209.1  | 71.4 | 1  | K.QLFYLPK.K                                                                                  |
| HsTIP60_Ti_106.231   | 2.8007 | 0.1259 | 1107.48 | 1108.369 | 1961.8 | 1 | 162.9  | 75   | 2  | K.QLFYLPK.N                                                                                  |
| HsMRGBP-FLAG_Ti      | 3.7533 | 0.2863 | 1673.28 | 1672.832 | 5382.9 | 1 | 1323.9 | 76.9 | 1  | K.KNVDSILEDYANYK.K                                                                           |
| HsMRGBP-FLAG_Ti      | 5.021  | 0.3066 | 1800.78 | 1801.006 | 8298.7 | 1 | 1615.3 | 71.4 | 4  | K.KNVDSILEDYANYK.S                                                                           |
| HsTIP60_Ti_104.403   | 4.7168 | 0.2931 | 1544.23 | 1544.658 | 6772   | 2 | 1172.3 | 75   | 58 | K.NVDSILEDYANYK.K                                                                            |
| HsMRGBP-FLAG_Ti      | 3.2546 | 0.252  | 1544.64 | 1544.658 | 4804.1 | 1 | 550    | 62.5 | 8  | K.NVDSILEDYANYK.K                                                                            |
| HsTIP60_Ti_106.256   | 4.1615 | 0.2784 | 1673.84 | 1672.832 | 6496   | 1 | 1332.8 | 76.9 | 14 | K.NVDSILEDYANYK.S                                                                            |
| HsTIP60_Ti_106.232   | 4.8411 | 0.3917 | 1921.7  | 1922.102 | 6504.8 | 1 | 1400.4 | 67.6 | 2  | R.GNTDNKEYAVNEVVAGIK.E                                                                       |
| HsMRGBP-FLAG_Ti      | 3.4706 | 0.229  | 1291.59 | 1292.475 | 4128.7 | 2 | 414.9  | 68.2 | 11 | K.EYAVNEVVAGIK.E                                                                             |
| HsTIP60_Ti_103.259   | 3.9686 | 0.3073 | 1292.31 | 1292.475 | 5695.1 | 1 | 1069.2 | 81.8 | 59 | K.EYAVNEVVAGIK.E                                                                             |
| HsMRGBP-FLAG_Ti      | 4.7656 | 0.1574 | 1719.77 | 1720.036 | 6223.4 | 1 | 1626.6 | 84.6 | 21 | K.EYFNVMLGTQLLYK.F                                                                           |
| HsMRGBP-FLAG_Ti      | 6.2804 | 0.383  | 3324.58 | 3323.753 | 7672   | 1 | 1125.3 | 29.5 | 2  | K.FERPQYAEILADHPDAPMSQVYGAPHLR.L                                                             |
| HsMRGBP-FLAG_Ti      | 3.0795 | 0.2746 | 1421.62 | 1422.679 | 7413.3 | 1 | 670.5  | 58.3 | 9  | R.IGAMLAYTPLDEK.S                                                                            |
| HsTIP60_Ti_105.222   | 4.9481 | 0.3579 | 1422.29 | 1422.679 | 6181.6 | 1 | 1429.5 | 83.3 | 30 | R.IGAMLAYTPLDEK.S                                                                            |
| HsMRGBP-FLAG_Ti      | 4.1157 | 0.3935 | 1661.9  | 1660.997 | 6753.1 | 1 | 1302.3 | 73.1 | 3  | K.SLALLLNLYLHDFLK.Y                                                                          |
| HsMRGBP-FLAG_Ti      | 4.6934 | 0.3976 | 2254.87 | 2255.405 | 4821.5 | 1 | 614.4  | 50   | 16 | K.NSATLFSASDYEVAPPEYHR.K                                                                     |
| HsMRGBP-FLAG_Ti      | 4.2899 | 0.2286 | 2257.48 | 2255.405 | 5306   | 1 | 862.2  | 39.5 | 6  | K.NSATLFSASDYEVAPPEYHR.K                                                                     |
| HsMRGBP-FLAG_Ti      | 4.5169 | 0.4416 | 2382.92 | 2383.579 | 4869.7 | 1 | 544.7  | 45   | 7  | K.NSATLFSASDYEVAPPEYHRK.A                                                                    |
| gi 5174447 re        | 21     | 214    | 77.60%  | 317      | 35077  |   |        |      |    | 7.7 guanine nucleotide binding protein (G protein), beta polypeptide 2-like 1 [Homo sapiens] |
| * HsFlag-NUFIP_Ti_11 | 5.3864 | 0.2976 | 2628.04 | 2628.965 | 7020.3 | 1 | 2211.4 | 41.3 | 11 | K.GHNGWVTQIATTPQFPDMILSASR.D                                                                 |
| * HsFlag-NUFIP_Ti_1C | 6.1819 | 0.4492 | 2628.77 | 2628.965 | 5280.1 | 1 | 1135.6 | 54.3 | 19 | K.GHNGWVTQIATTPQFPDMILSASR.D                                                                 |
| * HsFlag-NUFIP_Ti_1C | 3.7934 | 0.1985 | 1563.79 | 1563.71  | 9204.2 | 1 | 1290.5 | 70.8 | 2  | K.LTRDETNYGIPQR.A                                                                            |
| * HsFlag-NUFIP_Ti_1C | 3.335  | 0.2925 | 1193.15 | 1193.258 | 3842.5 | 1 | 642.1  | 83.3 | 1  | R.DETNYGIPQR.A                                                                               |
| * HsFlag-NUFIP_Ti_11 | 5.2176 | 0.3939 | 2962.04 | 2963.192 | 8897.3 | 1 | 1691.4 | 34.3 | 11 | R.GHSHFVSDVVISSDGGQFALSGSWDGLR.L                                                             |
| * HsFlag-NUFIP_Ti_1C | 3.0533 | 0.2608 | 1265.45 | 1265.409 | 6637.7 | 1 | 893.3  | 75   | 3  | R.LWDLTTGTTTR.R                                                                              |
| * HsFlag-NUFIP_Ti_1C | 4.3417 | 0.4235 | 1310.48 | 1310.406 | 8209.3 | 1 | 1557.2 | 81.8 | 34 | K.DVLSVAFSSDNR.Q                                                                             |
| * HsFlag-NUFIP_Ti_1C | 3.9665 | 0.2909 | 1982.51 | 1983.067 | 7188.5 | 2 | 868    | 40   | 3  | K.YTVQDESHSEWVSCVR.F                                                                         |
| * HsFlag-NUFIP_Ti_1C | 4.5155 | 0.3987 | 1983.32 | 1983.067 | 9732.8 | 1 | 1385.6 | 63.3 | 21 | K.YTVQDESHSEWVSCVR.F                                                                         |
| * HsFlag-NUFIP_Ti_1C | 4.3128 | 0.3965 | 1908.59 | 1909.072 | 5854.4 | 1 | 1027.9 | 65.6 | 4  | R.FSPNSSNPIIVSCGWDK.L                                                                        |
| * HsFlag-NUFIP_Ti_11 | 5.1331 | 0.4982 | 2743.7  | 2744.944 | 8155.5 | 1 | 1089.4 | 46.2 | 8  | K.TNHIGHTGYLNTVTVSPDGSLCASGGK.D                                                              |

|                |                    |        |        |         |          |         |                                               |        |      |     |                                       |
|----------------|--------------------|--------|--------|---------|----------|---------|-----------------------------------------------|--------|------|-----|---------------------------------------|
| *              | HsFlag-NUFIP_Ti_11 | 6.2905 | 0.257  | 2745.01 | 2744.944 | 5912.2  | 1                                             | 1254.8 | 36.5 | 4   | K.TNHIGHTGYLNTVTVSPDGSLCASGGK.D       |
|                | HsFlag-NUFIP_Ti_1C | 4.0515 | 0.3373 | 1477.12 | 1477.632 | 6419.9  | 1                                             | 1302.8 | 75   | 3   | K.DGQAMLWDLNEGK.H                     |
| *              | HsFlag-NUFIP_Ti_1C | 7.1411 | 0.4933 | 2276.07 | 2277.508 | 7228.2  | 1                                             | 2777   | 76.3 | 18  | K.HLYTLDDGGDIINALCFSPNR.Y             |
| *              | HsFlag-NUFIP_Ti_1C | 4.4399 | 0.3027 | 2277.38 | 2277.508 | 6651.3  | 2                                             | 781.5  | 34.2 | 2   | K.HLYTLDDGGDIINALCFSPNR.Y             |
| *              | HsFlag-NUFIP_Ti_11 | 5.2396 | 0.3982 | 3625.98 | 3626.038 | 4655.6  | 1                                             | 582.3  | 27.4 | 2   | K.HLYTLDDGGDIINALCFSPNRYWLCAATGPSIK.I |
| *              | HsFlag-NUFIP_Ti_1C | 4.1489 | 0.3726 | 1367.51 | 1367.554 | 6270    | 1                                             | 1501.9 | 81.8 | 4   | R.YWLCAATGPSIK.I                      |
| *              | HsFlag-NUFIP_Ti_1C | 5.4239 | 0.4534 | 1789.6  | 1790.064 | 9965.2  | 1                                             | 2062.8 | 73.3 | 43  | K.IIVDELKQEVISTSSK.A                  |
| *              | HsFlag-NUFIP_Ti_11 | 3.8688 | 0.3396 | 3069.43 | 3070.308 | 10544.5 | 1                                             | 1096.1 | 26.9 | 1   | K.AEPPQCTSLAWSADGQTLFAGYTDNLVR.V      |
| *              | HsFlag-NUFIP_Ti_1C | 4.6353 | 0.4509 | 3070.31 | 3070.308 | 4345.5  | 1                                             | 608.9  | 46.3 | 13  | K.AEPPQCTSLAWSADGQTLFAGYTDNLVR.V      |
| *              | HsFlag-NUFIP_Ti_1C | 3.1903 | 0.2658 | 1060.4  | 1060.241 | 6730    | 1                                             | 1289.3 | 93.8 | 7   | R.VWQVTIGTR.-                         |
| gij 24308444 r | 32                 | 659    | 75.90% | 357     | 39740    | 8.1     | hypothetical protein LOC116143 [Homo sapiens] |        |      |     |                                       |
| *              | HsFlag-NUFIP_Ti_1C | 2.6217 | 0.1518 | 1047.66 | 1048.274 | 5291.2  | 3                                             | 542.2  | 68.8 | 13  | K.PQIIAHIQK.G                         |
| *              | HsFlag-NUFIP_Ti_1C | 3.2571 | 0.1339 | 1048.22 | 1048.274 | 6232    | 7                                             | 922    | 81.2 | 2   | K.PQIIAHIQK.G                         |
| *              | HsFLAG-p53-DNA-D   | 3.1431 | 0.3654 | 1250.41 | 1251.347 | 8814.2  | 1                                             | 784.8  | 66.7 | 4   | K.GFNYYTVFDCK.W                       |
| *              | HsFlag-FLJ20643_Ti | 3.778  | 0.3511 | 1251.46 | 1251.347 | 7469.4  | 1                                             | 1231.1 | 83.3 | 11  | K.GFNYYTVFDCK.W                       |
| *              | HsFlag-FLJ20643_Ti | 3.0161 | 0.3314 | 1043.51 | 1043.229 | 4188.4  | 1                                             | 877.8  | 87.5 | 6   | K.FVTMGNFAR.G                         |
| *              | HsFlag-DPCD_Ti_20  | 4.9626 | 0.393  | 1771.54 | 1772.011 | 9364.9  | 1                                             | 1659   | 66.7 | 94  | R.GTGVIQLYEIQHGD.L                    |
| *              | HsFlag-ZnF-HIT2_Ti | 3.6914 | 0.2482 | 1772.32 | 1772.011 | 5905.8  | 1                                             | 1095.5 | 45   | 1   | R.GTGVIQLYEIQHGD.L                    |
| *              | HsFlag-FLJ20643_Ti | 2.4781 | 0.159  | 1325.65 | 1326.418 | 3085.6  | 4                                             | 144.7  | 63.6 | 2   | K.CGTFGATSLQQR.Y                      |
| *              | HsFLAG-RPB5MP_2    | 3.8848 | 0.4091 | 1326.17 | 1326.418 | 7017.7  | 1                                             | 1073.3 | 77.3 | 8   | K.CGTFGATSLQQR.Y                      |
| *              | HsFlag-NUFIP_Ti_1C | 5.1997 | 0.4292 | 3022.54 | 3023.433 | 7741.6  | 1                                             | 836.8  | 36.5 | 29  | R.YLATGDFGNNLHIWNLEAPEMPVYSVK.G       |
| *              | HsFlag-ZnF-HIT2_Ti | 5.8278 | 0.4586 | 3023.37 | 3023.433 | 5025.5  | 1                                             | 1343.7 | 39.4 | 79  | R.YLATGDFGNNLHIWNLEAPEMPVYSVK.G       |
| *              | HsFLAG-p53-DNA-D   | 5.2092 | 0.4397 | 2832.1  | 2832.186 | 6074    | 1                                             | 1727.4 | 37.5 | 3   | K.GHKEIINADIGIGLIGEGAPEIVTGSR.D       |
| *              | HsFlag-ZnF-HIT2_Ti | 6.5542 | 0.5651 | 2508.55 | 2509.819 | 8263.1  | 1                                             | 2610.2 | 62   | 127 | K.EIINADIGIGLIGEGAPEIVTGSR.D          |
| *              | HsFLAG-p53-DNA-D   | 5.3446 | 0.3715 | 2511.15 | 2509.819 | 8006.7  | 1                                             | 1826.8 | 39   | 1   | K.EIINADIGIGLIGEGAPEIVTGSR.D          |
| *              | HsFLAG-TIP49a_Ti_  | 3.0423 | 0.3307 | 1900.28 | 1900.07  | 5756.7  | 3                                             | 435    | 46.9 | 1   | R.QKDDPVANMEPVQGENK.R                 |
| *              | HsFlag-FLJ20643_Ti | 3.6677 | 0.3719 | 2056.42 | 2056.258 | 7044.5  | 1                                             | 663.2  | 52.9 | 5   | R.QKDDPVANMEPVQGENK.R                 |
| *              | HsFlag-FLJ20643_Ti | 3.2414 | 0.2776 | 1800.75 | 1799.953 | 4984.2  | 1                                             | 483.3  | 56.7 | 1   | K.DDPVANMEPVQGENK.D                   |
| *              | HsFLAG-RPB5MP_2    | 3.6306 | 0.3091 | 1961.69 | 1961.02  | 8594.4  | 1                                             | 1310.2 | 45   | 1   | R.DCWTVAFGNAYNQEER.V                  |
| *              | HsFlag-NUFIP_Ti_1C | 5.5578 | 0.4537 | 1962.51 | 1961.02  | 7556.5  | 1                                             | 1964.3 | 76.7 | 71  | R.DCWTVAFGNAYNQEER.V                  |
| *              | HsFLAG-p53-DNA-D   | 3.1817 | 0.2087 | 1310.37 | 1311.4   | 7092    | 1                                             | 854.3  | 68.2 | 6   | R.VVCAGYDNGDIK.L                      |
| *              | HsFLAG-RPB5MP_2    | 3.6406 | 0.3209 | 1311.13 | 1311.4   | 5902.3  | 1                                             | 1328   | 81.8 | 8   | R.VVCAGYDNGDIK.L                      |
| *              | HsFlag-FLJ20643_Ti | 3.4258 | 0.2612 | 1326.68 | 1325.43  | 6951.4  | 1                                             | 816.1  | 70   | 18  | K.NGVCSLEFDRK.D                       |
| *              | HsFLAG-p53-DNA-D   | 2.1566 | 0.2168 | 917.54  | 918.078  | 8356.5  | 2                                             | 588    | 62.5 | 1   | K.LVATSLEGK.F                         |
| *              | HsFLAG-p53-DNA-D   | 2.794  | 0.1859 | 918.26  | 918.078  | 2421.2  | 1                                             | 570.1  | 93.8 | 1   | K.LVATSLEGK.F                         |
| *              | HsFlag-NUFIP_Ti_1C | 2.2538 | 0.2335 | 951.6   | 952.119  | 6779.8  | 4                                             | 685.6  | 83.3 | 10  | K.FHVDMR.T                            |
| *              | HsFlag-ZnF-HIT2_Ti | 2.5009 | 0.236  | 952.35  | 952.119  | 3607.6  | 1                                             | 724.1  | 91.7 | 1   | K.FHVDMR.T                            |
| *              | HsFLAG-BC014022_   | 3.8507 | 0.3697 | 1517.11 | 1517.682 | 4707.5  | 1                                             | 931    | 73.1 | 2   | R.TQHPTKGFASVSEK.A                    |
| *              | HsFlag-NUFIP_Ti_1C | 5.2692 | 0.3973 | 1671.71 | 1670.952 | 6937.8  | 1                                             | 1918.7 | 80   | 130 | R.ELFLTAGGAGGLHLWK.Y                  |
| *              | HsFLAG-BC014022_   | 5.5377 | 0.4476 | 2619.92 | 2621.013 | 5715    | 1                                             | 1754.7 | 43.2 | 1   | R.ELFLTAGGAGGLHLWKYEYPIQR.S           |
| *              | HsFlag-NUFIP_Ti_11 | 5.0459 | 0.3556 | 3663.49 | 3663.045 | 6465.5  | 1                                             | 737.7  | 26.5 | 17  | K.DSEGIEMGVAGSVLLQNVTLSTQPISLWSPDK.R  |
| *              | HsFLAG-UTX1_Ti_2   | 3.952  | 0.3652 | 1685.98 | 1685.81  | 3786    | 1                                             | 758.4  | 76.9 | 4   | K.RGLCVCSFSDQTVR.V                    |
| *              | HsFlag-FLJ20643_Ti | 2.5491 | 0.1999 | 1532.44 | 1529.622 | 8078.7  | 1                                             | 1076.8 | 66.7 | 1   | R.GLCVCSFSDQTVR.V                     |

| gi 39812115 r | 79                | 1098   | 75.50% | 624     | 70484    | 7.8 actin-related protein 8 [Homo sapiens] |   |        |      |                                          |
|---------------|-------------------|--------|--------|---------|----------|--------------------------------------------|---|--------|------|------------------------------------------|
| *             | HsFLAG-ARP8_Ti_2  | 4.3155 | 0.4299 | 1887.95 | 1889.208 | 5429.6                                     | 1 | 659.7  | 55.9 | 2 R.IGRATDTLPASIPHVIAR.R                 |
| *             | HsFLAG-ARP8_Ti_2  | 2.7813 | 0.2683 | 1561.69 | 1562.809 | 4098.6                                     | 1 | 307.2  | 50   | 6 R.ATDTLPASIPHVIAR.R                    |
| *             | HsFLAG-ARP8_Ti_2  | 4.3263 | 0.3803 | 1562.93 | 1562.809 | 3546                                       | 1 | 492.9  | 64.3 | 29 R.ATDTLPASIPHVIAR.R                   |
| *             | HsFLAG-ARP8_Ti_2  | 3.546  | 0.238  | 1565.08 | 1562.809 | 3685.9                                     | 1 | 741.1  | 46.4 | 1 R.ATDTLPASIPHVIAR.R                    |
| *             | HsFLAG-ARP5_Ti_1  | 2.2401 | 0.1862 | 1226.55 | 1227.409 | 6977                                       | 1 | 509.5  | 61.1 | 1 R.HKQQGQPLYK.D                         |
| *             | HsFLAG-ARP5_Ti_1  | 2.799  | 0.0862 | 1227.34 | 1227.409 | 8084.3                                     | 4 | 832.4  | 72.2 | 1 R.HKQQGQPLYK.D                         |
| *             | HsFLAG-ARP8_Ti_2  | 2.8681 | 0.3036 | 1732.4  | 1732.98  | 4510.4                                     | 2 | 331.9  | 53.8 | 1 K.QQGQPLYKDSWLLR.E                     |
| *             | HsFLAG-ARP8_Ti_2  | 3.5546 | 0.1045 | 3115.32 | 3115.432 | 6674.5                                     | 1 | 445    | 24   | 1 K.QQGQPLYKDSWLLREGLNKPESNEQR.Q         |
| *             | HsFLAG-ARP8_Ti_2  | 4.5174 | 0.2651 | 2712.2  | 2712.982 | 8851.4                                     | 6 | 657.8  | 28.4 | 2 K.DSWLLREGLNKPESNEQRQNGLK.M            |
| *             | HsFLAG-ARP8_Ti_2  | 2.8889 | 0.2992 | 1401.35 | 1401.476 | 3482.6                                     | 1 | 273.4  | 63.6 | 1 R.EGLNKPESNEQR.Q                       |
| *             | HsFLAG-ARP8_Ti_1  | 2.7718 | 0.2435 | 1401.67 | 1401.476 | 3237.8                                     | 4 | 336.6  | 63.6 | 6 R.EGLNKPESNEQR.Q                       |
| *             | HsFLAG-ARP8_Ti_2  | 3.4759 | 0.1065 | 1078.34 | 1078.271 | 4205.5                                     | 2 | 932.8  | 87.5 | 5 K.MVDQAIWSK.K                          |
| *             | HsFLAG-ARP8_Ti_2  | 2.5774 | 0.1462 | 1079.54 | 1078.271 | 10426.1                                    | 6 | 735.7  | 68.8 | 7 K.MVDQAIWSK.K                          |
| *             | HsFLAG-TIP49b_Ti_ | 3.5298 | 0.2529 | 1153.47 | 1153.327 | 7382.9                                     | 1 | 1084.7 | 83.3 | 30 R.RIPVSPEQAR.S                        |
| *             | HsFLAG-ARP8_Ti_2  | 3.8359 | 0.3849 | 1627.51 | 1627.825 | 6382.2                                     | 1 | 569.5  | 61.5 | 5 K.QMRPAILDHCSGNK.W                     |
| *             | HsFLAG-ARP8_Ti_1  | 4.0173 | 0.2027 | 1630.37 | 1627.825 | 9114.2                                     | 1 | 1671.4 | 50   | 4 K.QMRPAILDHCSGNK.W                     |
| *             | HsFLAG-ARP8_Ti_1  | 2.9937 | 0.3103 | 1211.14 | 1212.314 | 4402.7                                     | 1 | 482.8  | 70   | 3 R.PAILDHCSGNK.W                        |
| *             | HsFLAG-ARP8_Ti_2  | 3.7251 | 0.2978 | 1213.13 | 1212.314 | 8263.4                                     | 1 | 1394.1 | 80   | 9 R.PAILDHCSGNK.W                        |
| *             | HsFLAG-ARP8_Ti_2  | 7.0604 | 0.4135 | 3926.42 | 3926.305 | 10452.8                                    | 1 | 1903.3 | 31.5 | 40 K.WTNTSHHPEYLVGEEALYVNPLDCYNIHWPIR.R  |
| *             | HsFLAG-ARP8_Ti_2  | 3.7727 | 0.1921 | 4082.99 | 4082.492 | 4374                                       | 1 | 608.2  | 26.6 | 1 K.WTNTSHHPEYLVGEEALYVNPLDCYNIHWPIRR.G  |
| *             | HsFLAG-ARP8_Ti_2  | 2.6915 | 0.1594 | 1231.56 | 1232.506 | 6047.2                                     | 3 | 902.3  | 77.8 | 4 K.YLEIPLKDLK.Y                         |
| *             | HsFLAG-ARP5_Ti_1  | 2.9162 | 0.164  | 1232.46 | 1232.506 | 5389.3                                     | 5 | 787.5  | 77.8 | 1 K.YLEIPLKDLK.Y                         |
| *             | HsFLAG-ARP8_Ti_1  | 3.0031 | 0.3008 | 1844.2  | 1845.158 | 3733.5                                     | 1 | 392.3  | 57.7 | 1 K.YYRCILLIPDIYNK.Q                     |
| *             | HsFLAG-ARP8_Ti_2  | 2.6867 | 0.1847 | 1361.42 | 1362.618 | 4676.7                                     | 2 | 420.7  | 60   | 3 R.CILLIPDIYNK.Q                        |
| *             | HsFLAG-ARP8_Ti_1  | 2.3631 | 0.0842 | 1090.37 | 1091.413 | 6163.4                                     | 9 | 478.3  | 75   | 1 K.ELVNMILMK.M                          |
| *             | HsFLAG-ARP8_Ti_2  | 2.8729 | 0.1386 | 1091.3  | 1091.413 | 6852.8                                     | 1 | 784    | 81.2 | 5 K.ELVNMILMK.M                          |
| *             | HsFLAG-ARP8_Ti_2  | 6.8455 | 0.4104 | 3491.05 | 3490.796 | 10141.4                                    | 1 | 1883.8 | 30.5 | 66 K.MGFSGIVVHQESVCATYGSGLSSTCIVDVGDK.T  |
| *             | HsFLAG-ARP8_Ti_1  | 1.9558 | 0.1085 | 1505.4  | 1506.545 | 5269.5                                     | 4 | 246    | 45.8 | 1 K.TSVCCVEDGVSHR.N                      |
| *             | HsFLAG-ARP8_Ti_2  | 4.1342 | 0.4822 | 1507.19 | 1506.545 | 6566.2                                     | 1 | 1224.6 | 75   | 26 K.TSVCCVEDGVSHR.N                     |
| *             | HsFLAG-ARP8_Ti_1  | 3.1116 | 0.3149 | 1297.68 | 1298.405 | 3516.5                                     | 1 | 331.8  | 72.7 | 9 R.LCLAYGGSDVSR.C                       |
| *             | HsFLAG-ARP8_Ti_2  | 3.7487 | 0.2661 | 1299.32 | 1298.405 | 6959.8                                     | 1 | 1871.5 | 86.4 | 7 R.LCLAYGGSDVSR.C                       |
| *             | HsFLAG-ARP8_Ti_2  | 2.9681 | 0.1829 | 2482.49 | 2483.779 | 9380                                       | 2 | 376.4  | 36.8 | 3 R.LCLAYGGSDVSRCFYWLMQR.A               |
| *             | HsFLAG-ARP8_Ti_1  | 2.2023 | 0.2834 | 1203.41 | 1204.398 | 3606.5                                     | 9 | 196.8  | 64.3 | 6 R.CFYWLMQR.A                           |
| *             | HsFLAG-ARP8_Ti_2  | 3.4747 | 0.2497 | 1204.37 | 1204.398 | 7944.6                                     | 1 | 1323   | 92.9 | 24 R.CFYWLMQR.A                          |
| *             | HsFLAG-ARP8_Ti_2  | 2.4782 | 0.098  | 1583.58 | 1584.738 | 3797.4                                     | 8 | 206.4  | 45.8 | 1 R.AGFPYRECQLTNK.M                      |
| *             | HsFLAG-ARP8_Ti_2  | 4.0565 | 0.1901 | 1584.7  | 1584.738 | 7670.3                                     | 2 | 821.2  | 62.5 | 4 R.AGFPYRECQLTNK.M                      |
| *             | HsFLAG-ARP8_Ti_2  | 4.3369 | 0.3972 | 2145.14 | 2145.454 | 9721                                       | 1 | 2620   | 51.6 | 2 R.ECQLTNKMDCLLLQHLK.E                  |
| *             | HsFLAG-FLJ20309_  | 3.6119 | 0.2529 | 1271.12 | 1271.527 | 8200.6                                     | 2 | 1042.3 | 77.8 | 17 K.MDCLLLQHLK.E                        |
| *             | HsFLAG-ARP8_Ti_2  | 3.1164 | 0.219  | 1271.22 | 1271.527 | 5583.6                                     | 1 | 541.4  | 66.7 | 3 K.MDCLLLQHLK.E                         |
| *             | HsFLAG-ARP8_Ti_2  | 6.3072 | 0.3368 | 2589.31 | 2589.747 | 10794.9                                    | 1 | 1370.8 | 36.2 | 90 K.ETFCHLDQDISGLQDHEFQIR.H             |
| *             | HsFLAG-ARP8_Ti_2  | 5.931  | 0.3584 | 2589.74 | 2589.747 | 8562.9                                     | 1 | 1214.9 | 52.5 | 96 K.ETFCHLDQDISGLQDHEFQIR.H             |
| *             | HsFLAG-ARP8_Ti_2  | 5.3678 | 0.2854 | 4015.19 | 4015.356 | 7484.8                                     | 1 | 748.1  | 25   | 14 K.ETFCHLDQDISGLQDHEFQIRHPDSPALLYQFR.L |



|               |                     |        |        |         |          |                                                  |   |        |      |                                         |
|---------------|---------------------|--------|--------|---------|----------|--------------------------------------------------|---|--------|------|-----------------------------------------|
| *             | HsFLAG-ARP8_Ti_2    | 2.4409 | 0.3241 | 1443.84 | 1444.633 | 3299.8                                           | 1 | 297.7  | 59.1 | 5 R.HPDSALLYQFR.L                       |
| *             | HsFLAG-ARP8_Ti_2    | 3.4305 | 0.2987 | 1444.71 | 1444.633 | 5933.3                                           | 2 | 713.4  | 72.7 | 33 R.HPDSALLYQFR.L                      |
| *             | HsFLAG-ARP8_Ti_2    | 3.8861 | 0.1588 | 1444.9  | 1444.633 | 4902.8                                           | 3 | 1006.2 | 54.5 | 14 R.HPDSALLYQFR.L                      |
| *             | HsFLAG-ARP8_Ti_2    | 5.3521 | 0.3625 | 2594.14 | 2596.059 | 6271.5                                           | 1 | 1255.4 | 54.3 | 4 R.LGDEKLQAPMALFYATFGIVGQK.M           |
| *             | HsFLAG-ARP8_Ti_2    | 4.6711 | 0.2336 | 2597.68 | 2596.059 | 5138.4                                           | 1 | 918.7  | 37   | 2 R.LGDEKLQAPMALFYATFGIVGQK.M           |
| *             | HsFLAG-ARP8_Ti_2    | 6.2077 | 0.4365 | 2053.06 | 2053.47  | 6921.5                                           | 1 | 2114.1 | 50   | 6 K.LQAPMALFYATFGIVGQK.M                |
| *             | HsFLAG-ARP8_Ti_2    | 5.2604 | 0.4039 | 2053.2  | 2053.47  | 8064.6                                           | 1 | 1976.1 | 72.2 | 18 K.LQAPMALFYATFGIVGQK.M               |
| *             | HsFLAG-ARP8_Ti_2    | 2.6249 | 0.1023 | 884.93  | 887.045  | 6004                                             | 1 | 848.6  | 100  | 1 K.MTTLQHR.S                           |
| *             | HsFLAG-ARP8_Ti_2    | 5.0733 | 0.4119 | 2269.68 | 2268.358 | 5099.2                                           | 1 | 954.2  | 63.2 | 29 R.SQGDPEDPHDEHYLLATQSK.Q             |
| *             | HsFLAG-ARP8_Ti_2    | 4.2687 | 0.2569 | 2270.83 | 2268.358 | 4207.6                                           | 2 | 684.1  | 39.5 | 6 R.SQGDPEDPHDEHYLLATQSK.Q              |
| *             | HsFLAG-ARP5_Ti_1    | 3.8845 | 0.3881 | 2939.07 | 2940.066 | 5643.1                                           | 1 | 1114.9 | 38   | 3 R.SQGDPEDPHDEHYLLATQSKQECSAK.A        |
| *             | HsFLAG-ARP8_Ti_2    | 3.8173 | 0.2452 | 2940.14 | 2940.066 | 5176.8                                           | 1 | 489.9  | 40   | 1 R.SQGDPEDPHDEHYLLATQSKQECSAK.A        |
| *             | HsFLAG-ARP5_Ti_1    | 3.442  | 0.3224 | 1505.93 | 1505.714 | 5263                                             | 1 | 1023.5 | 73.1 | 1 R.KSASKPIGFEGDLR.G                    |
| *             | HsFLAG-TCF3_Ti_1    | 3.495  | 0.2915 | 1377.74 | 1377.54  | 3552.5                                           | 2 | 534.8  | 70.8 | 11 K.SASKPIGFEGDLR.G                    |
| *             | HsFLAG-ARP8_Ti_1    | 2.2742 | 0.1372 | 1003.58 | 1004.131 | 3584.7                                           | 7 | 340.3  | 75   | 1 K.PIGFEGDLR.G                         |
| *             | HsFLAG-ARP8_Ti_2    | 3.409  | 0.2367 | 1003.96 | 1004.131 | 4220.1                                           | 1 | 1014.1 | 93.8 | 5 K.PIGFEGDLR.G                         |
| *             | HsFLAG-ARP8_Ti_2    | 6.5971 | 0.4611 | 4275.21 | 4274.592 | 10453.8                                          | 1 | 1931.3 | 27.5 | 7 MSR.K                                 |
| *             | HsFLAG-ARP8_Ti_2    | 8.6309 | 0.5368 | 3303.86 | 3304.585 | 10003.3                                          | 1 | 5032.1 | 41.9 | 74 R.LHSQEVDLGSAQGDGLMAGNDSEEALTALMSR.K |
| *             | HsFLAG-ARP8_Ti_2    | 3.3947 | 0.2344 | 1093.48 | 1094.296 | 5209.6                                           | 2 | 669.6  | 66.7 | 7 R.KTAISLFEGK.A                        |
| *             | HsFLAG-ARP8_Ti_2    | 3.545  | 0.1686 | 1093.58 | 1094.296 | 4995.4                                           | 1 | 890.1  | 83.3 | 11 R.KTAISLFEGK.A                       |
| *             | HsFLAG-ARP8_Ti_2    | 2.4017 | 0.1807 | 965.33  | 966.122  | 7055.9                                           | 8 | 483.6  | 62.5 | 8 K.TAISLFEGK.A                         |
| *             | HsFLAG-ARP8_Ti_2    | 2.7094 | 0.0919 | 966.26  | 966.122  | 4129.3                                           | 1 | 769.3  | 87.5 | 3 K.TAISLFEGK.A                         |
| *             | HsFlag-les6_293_Ti_ | 4.8274 | 0.3255 | 1722.02 | 1722.779 | 6485.6                                           | 1 | 1421.7 | 75   | 14 K.AILHSIDCCSSDDTK.K                  |
| *             | HsFLAG-ARP8_Ti_1    | 3.8035 | 0.2305 | 1723.91 | 1722.779 | 5496.6                                           | 2 | 797.3  | 42.9 | 2 K.AILHSIDCCSSDDTK.K                   |
| *             | HsFLAG-ARP8_Ti_1    | 4.0139 | 0.2433 | 1851.41 | 1850.953 | 6980.9                                           | 2 | 938    | 40   | 2 K.AILHSIDCCSSDDTK.K                   |
| *             | HsFLAG-ARP8_Ti_1    | 4.9264 | 0.3848 | 1851.51 | 1850.953 | 7567.7                                           | 1 | 1645.8 | 73.3 | 8 K.AILHSIDCCSSDDTK.K                   |
| *             | HsFLAG-ARP8_Ti_2    | 4.6611 | 0.3544 | 1979.54 | 1979.127 | 9487.7                                           | 1 | 2228.1 | 71.9 | 1 K.AILHSIDCCSSDDTKK.M                  |
| *             | HsFLAG-ARP8_Ti_2    | 5.6409 | 0.4464 | 1740.66 | 1740.132 | 6441.2                                           | 1 | 1666.9 | 76.7 | 17 K.MYSSILVGGGLMFHK.A                  |
| *             | HsFLAG-ARP8_Ti_2    | 3.9552 | 0.2912 | 1741.42 | 1740.132 | 3824.8                                           | 4 | 391.3  | 36.7 | 1 K.MYSSILVGGGLMFHK.A                   |
| *             | HsFLAG-FLJ20309_    | 2.0515 | 0.1865 | 1028.44 | 1029.144 | 6488.6                                           | 4 | 424.2  | 71.4 | 1 K.AQEFLQHR.I                          |
| *             | HsFLAG-ARP8_Ti_2    | 2.8963 | 0.1873 | 1030.78 | 1029.144 | 6240.5                                           | 5 | 1024.2 | 92.9 | 9 K.AQEFLQHR.I                          |
| *             | HsFLAG-ARP8_Ti_2    | 3.5256 | 0.2291 | 1497.94 | 1497.74  | 9766.6                                           | 1 | 1256.7 | 72.7 | 3 K.AQEFLQHRILNK.M                      |
| *             | HsFLAG-ARP8_Ti_2    | 4.2295 | 0.2583 | 1553.8  | 1553.845 | 5770.5                                           | 1 | 1257.4 | 87.5 | 7 R.RIIENVDVITRPK.D                     |
| *             | HsFLAG-ARP8_Ti_2    | 2.9765 | 0.1573 | 1553.91 | 1553.845 | 2910.1                                           | 1 | 211    | 66.7 | 9 R.RIIENVDVITRPK.D                     |
| *             | HsFLAG-ARP8_Ti_2    | 4.2197 | 0.1436 | 1397.29 | 1397.658 | 7215.7                                           | 1 | 1681.6 | 86.4 | 29 R.IIENVDVITRPK.D                     |
| *             | HsFLAG-ARP8_Ti_2    | 5.797  | 0.3732 | 2196.15 | 2195.446 | 7900.5                                           | 1 | 1980.9 | 45.8 | 50 K.GGAVLACLDTTQELWIYQR.E              |
| *             | HsFLAG-ARP8_Ti_2    | 6.0385 | 0.4596 | 2196.53 | 2195.446 | 8710.1                                           | 1 | 2370.1 | 66.7 | 156 K.GGAVLACLDTTQELWIYQR.E             |
| gij42822884 r | 18                  | 148    | 75.50% | 192     | 20643    | 10 hypothetical protein LOC125476 [Homo sapiens] |   |        |      |                                         |
| *             | HsFLAG-ARP5_Ti_1    | 2.8521 | 0.1015 | 1904.26 | 1903.021 | 6150                                             | 1 | 393.2  | 42.1 | 2 K.KRPASPSHNGSSGGGYGASK.K              |
| *             | HsFlag-les6_293_Ti_ | 4.7623 | 0.5394 | 1774.28 | 1774.847 | 7315.2                                           | 1 | 1343   | 63.9 | 8 K.RPASPSHNGSSGGGYGASK.K               |
| *             | HsH2AZ-FLAG_293_    | 3.863  | 0.2922 | 1775.64 | 1774.847 | 8309.9                                           | 4 | 716.3  | 33.3 | 1 K.RPASPSHNGSSGGGYGASK.K               |
| *             | HsFlag-les6_293_Ti_ | 2.6681 | 0.2643 | 1903.59 | 1903.021 | 5265.7                                           | 2 | 384.7  | 44.7 | 1 K.RPASPSHNGSSGGGYGASK.K               |
| *             | HsFLAG-ARP8_Ti_2    | 4.5531 | 0.3591 | 1946.08 | 1947.142 | 6181.4                                           | 1 | 1294.1 | 63.9 | 13 K.ASASSFAQGISMEAMSENK.M              |

|             |                     |        |        |         |          |         |   |        |      |                                              |
|-------------|---------------------|--------|--------|---------|----------|---------|---|--------|------|----------------------------------------------|
| *           | HsFLAG-ARP5_Ti_1    | 2.9665 | 0.317  | 1407.97 | 1408.609 | 2869.7  | 7 | 293    | 66.7 | 1 K.MVPSEFSTGPVEK.A                          |
| *           | HsFLAG-TIP49b_Ti_   | 2.0157 | 0.1162 | 871.64  | 872.098  | 3203.9  | 1 | 458.1  | 78.6 | 1 K.AAKPLPFK.D                               |
| *           | HsFlag-les6_293_Ti_ | 3.4684 | 0.4127 | 1549.47 | 1550.674 | 2957.4  | 1 | 321.5  | 56.7 | 4 K.DPNFVHSGHGAVAGK.K                        |
| *           | HsFLAG-ARP8_Ti_2    | 4.5472 | 0.3358 | 1550.23 | 1550.674 | 3748.7  | 1 | 777.1  | 76.7 | 18 K.DPNFVHSGHGAVAGK.K                       |
| *           | HsFLAG-FLJ20309_    | 4.302  | 0.4046 | 2420.86 | 2421.714 | 6698.5  | 1 | 842.7  | 52.5 | 16 R.ALPWQLNDPNYFSIDAPPSFK.P                 |
| *           | Hs293Flag-les2_Ti_1 | 3.2879 | 0.1237 | 2718.88 | 2718.084 | 6507.4  | 1 | 403.5  | 34.8 | 4 R.ALPWQLNDPNYFSIDAPPSFKPAK.K               |
| *           | HsFLAG-ARP5_Ti_1    | 5.6808 | 0.4579 | 1986.64 | 1987.174 | 6055.2  | 1 | 1662.3 | 73.5 | 15 K.KYSDVSGLLANYTDPQSK.L                    |
| *           | HsH2AZ-FLAG_293_    | 5.0475 | 0.4461 | 1858.58 | 1859     | 6796.6  | 1 | 2040.4 | 75   | 13 K.YSDVSGLLANYTDPQSK.L                     |
| *           | HsFLAG-FLJ20309_    | 4.2593 | 0.3548 | 1392.57 | 1392.551 | 5425.7  | 1 | 1326.5 | 90   | 17 R.FSTIEEFSYIR.R                           |
| *           | HsFLAG-TCF3_Ti_1    | 4.6596 | 0.2825 | 1560.73 | 1560.837 | 6051.1  | 1 | 1432.8 | 51.9 | 2 R.RLPDSDVVTGYLALR.K                        |
| *           | HsFLAG-TCF3_Ti_1    | 4.7377 | 0.3624 | 1560.8  | 1560.837 | 5777    | 1 | 1344.1 | 80.8 | 28 R.RLPDSDVVTGYLALR.K                       |
| *           | HsFLAG-ARP5_Ti_1    | 4.8186 | 0.2947 | 1688.74 | 1689.011 | 6617.2  | 1 | 1678.8 | 51.8 | 2 R.RLPDSDVVTGYLALRK.A                       |
| *           | HsFLAG-TCF3_Ti_1    | 2.8612 | 0.201  | 1689.12 | 1689.011 | 5072.1  | 8 | 377.7  | 57.1 | 2 R.RLPDSDVVTGYLALRK.A                       |
| gi 34577110 | r                   | 23     | 73     | 74.70%  | 364      | 39420   |   |        |      | 8.1 aldolase A [Homo sapiens]                |
| gi 4557305  | re                  | 23     | 73     | 74.70%  | 364      | 39420   |   |        |      | 8.1 aldolase A [Homo sapiens]                |
| gi 34577112 | r                   | 23     | 73     | 74.70%  | 364      | 39420   |   |        |      | 8.1 aldolase A [Homo sapiens]                |
|             | HsFLAG-p53-DNA-D    | 3.0629 | 0.1785 | 1069.22 | 1069.206 | 6103.3  | 1 | 981.6  | 87.5 | 1 K.KELSDIAHR.I                              |
|             | HsFlag-VPS71_Ti_1   | 2.7354 | 0.3706 | 1332.59 | 1333.481 | 6706.1  | 1 | 662.3  | 61.5 | 2 K.GILAADESTGSIK.R                          |
|             | HsFlag-VPS71_Ti_1   | 4.436  | 0.3893 | 1334.59 | 1333.481 | 6440    | 1 | 1513.9 | 76.9 | 2 K.GILAADESTGSIK.R                          |
|             | HsFlag-VPS71_Ti_1   | 4.8945 | 0.343  | 1647.68 | 1647.742 | 6818.9  | 1 | 1563.9 | 84.6 | 1 K.RLQSIGTENTEENR.R                         |
|             | HsFlag-VPS71_Ti_1   | 7.2182 | 0.5056 | 3115.17 | 3115.566 | 9009.8  | 1 | 1277.2 | 30.8 | 3 R.QLLLTADDRVNPCIGGVILFHETLYQK.A            |
|             | HsFlag-VPS71_Ti_1   | 3.5113 | 0.3738 | 2088.73 | 2089.408 | 7154.2  | 1 | 1072.6 | 58.8 | 1 R.VNPCIGGVILFHETLYQK.A                     |
|             | HsFlag-DPCD_Ti_20   | 4.3599 | 0.1052 | 2273.73 | 2273.462 | 8043.6  | 1 | 608.1  | 43.2 | 1 K.GVVPLAGTNGETTTQGLDGLSER.C                |
|             | HsFlag-VPS71_Ti_1   | 4.8541 | 0.424  | 2107.1  | 2108.42  | 5082.2  | 1 | 1131.3 | 65.8 | 4 K.IGEHTPSALAIMENANVLAR.Y                   |
|             | HsFlag-VPS71_Ti_1   | 4.7245 | 0.2305 | 2108.8  | 2108.42  | 6763.9  | 1 | 1308.9 | 40.8 | 6 K.IGEHTPSALAIMENANVLAR.Y                   |
|             | HsFlag-VPS71_Ti_1   | 4.0335 | 0.3068 | 3022.16 | 3022.348 | 5181.6  | 2 | 408.1  | 36.5 | 3 R.YASICQQNGIVPIVEPEILPDGDHDLK.R            |
|             | HsFlag-VPS71_Ti_1   | 5.5709 | 0.2217 | 3022.85 | 3022.348 | 6479.9  | 2 | 791.7  | 30.8 | 6 R.YASICQQNGIVPIVEPEILPDGDHDLK.R            |
|             | HsH2AZ-FLAG_293_    | 1.9697 | 0.1264 | 763.69  | 763.955  | 6757.4  | 3 | 659.4  | 75   | 4 K.VLAAVYK.A                                |
|             | HsFLAG-FLJ20729_    | 4.5159 | 0.2775 | 1711.48 | 1710.971 | 8217.6  | 1 | 1314.5 | 60.7 | 8 K.ALSDHHIYLEGTLK.P                         |
|             | HsFlag-VPS71_Ti_1   | 3.9602 | 0.2695 | 1441.76 | 1441.611 | 4335.9  | 1 | 973.2  | 83.3 | 2 K.PNMVTPGHACTQK.F                          |
|             | HsFlag-VPS71_Ti_1   | 5.1914 | 0.4373 | 1676.71 | 1676.928 | 6375.4  | 1 | 1745.9 | 78.6 | 5 K.FSHEEIAMATVTLR.R                         |
|             | HsFlag-VPS71_Ti_1   | 3.1517 | 0.2674 | 1832.64 | 1833.116 | 10853.7 | 5 | 760.8  | 50   | 1 K.FSHEEIAMATVTLRR.T                        |
|             | HsFlag-VPS71_Ti_1   | 5.3631 | 0.3659 | 3216.07 | 3215.588 | 9152.7  | 1 | 2168.6 | 34.2 | 2 R.RTVPPAVTGITFLSGGQSEEEASINLNAINK.C        |
|             | HsFLAG-p53-DNA-D    | 3.1202 | 0.2367 | 1809.32 | 1810.115 | 3585.4  | 1 | 635.3  | 64.3 | 1 K.CPLLKPWALTFSYGR.A                        |
|             | HsFlag-VPS71_Ti_1   | 3.5725 | 0.2934 | 1198.81 | 1198.367 | 5068.6  | 1 | 1115.9 | 88.9 | 2 K.PWALTFSYGR.A                             |
|             | HsFLAG-p53-DNA-D    | 2.8641 | 0.1622 | 1094.36 | 1094.213 | 7427    | 2 | 935.6  | 81.2 | 1 K.AAQEEYVKR.A                              |
|             | HsFlag-VPS71_Ti_1   | 4.136  | 0.2515 | 1290.1  | 1289.444 | 7380.7  | 1 | 1420.7 | 81.8 | 11 K.RALANSLACQGK.Y                          |
|             | HsFlag-VPS71_Ti_1   | 2.54   | 0.1851 | 1133.56 | 1133.256 | 5973    | 1 | 440.8  | 60   | 1 R.ALANSLACQGK.Y                            |
|             | HsFLAG-Lin9_Ti_20   | 4.3034 | 0.4796 | 2228.57 | 2229.367 | 5567.1  | 1 | 1277.6 | 61.9 | 5 K.YTPSGQAGAAASESLFVSNHAY.-                 |
| gi 17986283 | r                   | 29     | 507    | 74.30%  | 451      | 50136   |   |        |      | 5.1 tubulin, alpha 3 [Homo sapiens]          |
|             | HsSrcap_Ti_205.362  | 5.2798 | 0.4255 | 4301.41 | 4299.657 | 10101.8 | 1 | 671.9  | 20.3 | 1 R.ECISIHVGQAGVQIGNACWELYCLEHGIQPDGQMPSDK.T |
|             | HsFLAG-ARP6_Ti_1    | 5.5507 | 0.3763 | 2011.61 | 2009.093 | 9267.4  | 1 | 1408.9 | 57.9 | 84 K.TIGGGDDSFNTFFSETGAGK.H                  |
|             | HsFLAG-ARP6_Ti_1    | 5.0349 | 0.3    | 1702.67 | 1702.945 | 4531.2  | 1 | 1118.7 | 78.6 | 44 R.AVFVDLEPTVIDEVR.T                       |

|                     |        |        |         |          |         |   |                                                |      |                                          |  |
|---------------------|--------|--------|---------|----------|---------|---|------------------------------------------------|------|------------------------------------------|--|
| HsFLAG-ARP6_Ti_1    | 4.0678 | 0.2493 | 1703.54 | 1702.945 | 8950.2  | 1 | 1040.6                                         | 42.9 | 1 R.AVFVDLEPTVIDEVR.T                    |  |
| HsFLAG-p53-DNA-D    | 3.8546 | 0.3066 | 2415.78 | 2416.655 | 9887    | 1 | 636.1                                          | 42.5 | 25 R.QLFHPEQLITGKEDAANNYAR.G             |  |
| HsSrcap_Ti_204.213  | 5.0964 | 0.4219 | 2416.38 | 2416.655 | 6002.3  | 1 | 934.1                                          | 37.5 | 18 R.QLFHPEQLITGKEDAANNYAR.G             |  |
| HsFLAG-ARP6_Ti_1    | 3.2026 | 0.111  | 1086.33 | 1086.274 | 5676.6  | 1 | 1026.6                                         | 93.8 | 15 K.EIIDLVLDLDR.I                       |  |
| HsFLAG-ARP6_Ti_1    | 5.5288 | 0.4605 | 3519.46 | 3520.951 | 9178.7  | 1 | 1611.9                                         | 30.5 | 2 R.KLADQCTGLQGFLVFHFSFGGGTSGSFTSLLMER.L |  |
| HsFLAG-ARP6_Ti_1    | 6.8756 | 0.4682 | 3390.27 | 3392.777 | 8761.3  | 1 | 1604.7                                         | 31.5 | 13 K.LADQCTGLQGFLVFHFSFGGGTSGSFTSLLMER.L |  |
| HsScrap_Ti_106.239  | 2.55   | 0.1652 | 1877.45 | 1876.082 | 6295.5  | 1 | 349.4                                          | 53.6 | 1 R.RNLDIRPTYTNLNR.L                     |  |
| HsFlag-ZnF-HIT2_Ti  | 2.9442 | 0.2517 | 1719.52 | 1719.895 | 6354.4  | 3 | 522.7                                          | 57.7 | 12 R.NLDIERPTYTNLNR.L                    |  |
| HsFLAG-ARP6_Ti_1    | 4.5345 | 0.4222 | 1458.63 | 1458.742 | 6748.6  | 1 | 1765.2                                         | 84.6 | 9 R.LIGQIVSSITASLR.F                     |  |
| HsFLAG-ARP6_Ti_1    | 5.8116 | 0.4265 | 2410.46 | 2410.689 | 5990.7  | 1 | 1327.4                                         | 60   | 74 R.FDGALNVDLTFQTNLVPYPR.I              |  |
| HsYL1_Ti_106.2380.  | 4.538  | 0.4145 | 1756.22 | 1758.07  | 4074.6  | 1 | 799.2                                          | 70   | 54 R.IHFPLATYAPVISAEEK.A                 |  |
| HsFLAG-ARP6_Ti_1    | 5.1723 | 0.3713 | 2751.88 | 2752.037 | 6388.1  | 1 | 727.7                                          | 32.6 | 7 K.AYHEQLSVAEITNACFEPANQMVK.C           |  |
| HsYL1_Ti_103.2152.  | 5.4112 | 0.353  | 2751.97 | 2752.037 | 8492.5  | 1 | 1660.1                                         | 52.2 | 3 K.AYHEQLSVAEITNACFEPANQMVK.C           |  |
| HsFLAG-ARP6_Ti_1    | 3.1777 | 0.2663 | 1250.3  | 1250.43  | 4496.7  | 1 | 907.7                                          | 93.8 | 7 K.YMACCLLYR.G                          |  |
| HsH2AZ-FLAG_293_    | 2.3357 | 0.2535 | 1015.43 | 1016.183 | 6915.1  | 2 | 562                                            | 72.2 | 14 K.DVNAAIATIK.T                        |  |
| HsSrcap_Ti_202.001  | 3.6793 | 0.2729 | 1017.71 | 1016.183 | 5879.8  | 1 | 1088.4                                         | 83.3 | 8 K.DVNAAIATIK.T                         |  |
| HsSrcap_Ti_205.279  | 4.5969 | 0.4286 | 1755.42 | 1755.98  | 5429.1  | 1 | 785.6                                          | 65.4 | 26 K.RTIQFVDWCPTGFK.V                    |  |
| HsSrcap_Ti_205.280  | 4.8872 | 0.2348 | 1757.48 | 1755.98  | 8327.5  | 1 | 2242.3                                         | 57.7 | 10 K.RTIQFVDWCPTGFK.V                    |  |
| HsSrcap_Ti_202.300  | 2.6402 | 0.345  | 1598.54 | 1599.793 | 6635.7  | 1 | 411.8                                          | 50   | 2 R.TIQFVDWCPTGFK.V                      |  |
| HsFLAG-TCF3_Ti_1    | 4.0211 | 0.3559 | 1599.41 | 1599.793 | 6154.4  | 1 | 984.8                                          | 70.8 | 8 R.TIQFVDWCPTGFK.V                      |  |
| HsFLAG-ARP6_Ti_2    | 4.0719 | 0.4153 | 1825.6  | 1826.103 | 3498.4  | 1 | 615.9                                          | 58.8 | 34 K.VGINYQPPTVVPGGDLAK.V                |  |
| HsFLAG-ARP6_Ti_1    | 6.0682 | 0.4321 | 1865.52 | 1866.108 | 10861.7 | 1 | 2782.2                                         | 75   | 18 R.AVCMLSNTTAIAEAWAR.L                 |  |
| HsFLAG-ARP6_Ti_1    | 4.4765 | 0.3204 | 1867.57 | 1866.108 | 8904.4  | 1 | 1596.3                                         | 45.3 | 7 R.AVCMLSNTTAIAEAWAR.L                  |  |
| HsFLAG-ARP6_Ti_1    | 3.7547 | 0.214  | 2330.07 | 2331.521 | 8623.8  | 3 | 888.4                                          | 34.2 | 2 R.AFVHWYVGEEMEEGFSEAR.E                |  |
| HsFLAG-ARP6_Ti_1    | 4.334  | 0.4395 | 2330.87 | 2331.521 | 6787.1  | 1 | 1352.6                                         | 57.9 | 3 R.AFVHWYVGEEMEEGFSEAR.E                |  |
| HsFlag-les6_293_Ti  | 4.6127 | 0.3488 | 2350.09 | 2350.275 | 8478.9  | 1 | 1358.3                                         | 57.5 | 5 K.DYEEVGVDSVEGEGEEGEEY.-               |  |
| gi 4885431 re       | 58     | 1356   | 72.50%  | 641      | 70025   |   | 5.6 heat shock 70kDa protein 1B [Homo sapiens] |      |                                          |  |
| HsFLAG-ARP6_Ti_1    | 5.785  | 0.3078 | 2265.88 | 2266.525 | 7092.9  | 1 | 1398.9                                         | 57.1 | 37 K.AAAIGIDLGTTYSCVGVFQHGK.V            |  |
| HsFLAG-ARP6_Ti_1    | 4.0748 | 0.3138 | 2267.01 | 2266.525 | 4372.5  | 1 | 773.6                                          | 35.7 | 14 K.AAAIGIDLGTTYSCVGVFQHGK.V            |  |
| HsFLAG-ARP6_Ti_1    | 5.0723 | 0.2775 | 3475.75 | 3476.837 | 7568.2  | 1 | 651.7                                          | 25   | 23 K.AAAIGIDLGTTYSCVGVFQHGKVEIANDQGNR.T  |  |
| HsFlag-FLJ90652_2   | 3.6517 | 0.3726 | 1487.89 | 1488.594 | 3812.9  | 1 | 610.4                                          | 75   | 34 R.TTPSYVAFTDTER.L                     |  |
| Hs293Flag-les2_Ti_1 | 3.2174 | 0.4318 | 1488.58 | 1488.594 | 3710.2  | 1 | 167.1                                          | 54.2 | 6 R.TTPSYVAFTDTER.L                      |  |
| HsFLAG-ARP6_Ti_2    | 5.6419 | 0.2894 | 1659.34 | 1659.839 | 4755.5  | 1 | 1178                                           | 78.6 | 39 K.NQVALNPQNTVFDAK.R                   |  |
| HsFLAG-TCF3_Ti_1    | 3.9084 | 0.3083 | 1815.46 | 1816.027 | 4917    | 1 | 699.4                                          | 60   | 3 K.NQVALNPQNTVFDAK.R.L                  |  |
| HsFLAG-TCF3_Ti_1    | 2.8868 | 0.2653 | 1222.47 | 1223.386 | 3364.3  | 1 | 525.2                                          | 75   | 7 K.FGDPVVQSDMK.H                        |  |
| HsFlag-FLJ90652_2   | 4.1764 | 0.3409 | 1222.48 | 1223.386 | 5313    | 1 | 1403.4                                         | 90   | 13 K.FGDPVVQSDMK.H                       |  |
| HsFlag-FLJ90652_2   | 2.6975 | 0.1757 | 1456.44 | 1456.601 | 4625.5  | 1 | 448                                            | 59.1 | 2 K.HWPFQVINDGDK.P                       |  |
| HsFLAG-ARP6_Ti_1    | 3.7224 | 0.3578 | 1457.44 | 1456.601 | 3155.5  | 1 | 697.6                                          | 81.8 | 5 K.HWPFQVINDGDK.P                       |  |
| HsFLAG-ARP6_Ti_1    | 5.4135 | 0.2578 | 1680.83 | 1681.891 | 5101    | 1 | 1587.9                                         | 59.6 | 43 K.HWPFQVINDGDKPK.V                    |  |
| HsFlag-ZnF-HIT2_Ti  | 4.2583 | 0.364  | 1681    | 1681.891 | 4034.1  | 1 | 1006.7                                         | 80.8 | 65 K.HWPFQVINDGDKPK.V                    |  |
| HsFLAG-ARP8_Ti_2    | 3.0492 | 0.1674 | 1139.2  | 1139.294 | 6594.2  | 2 | 723.8                                          | 72.2 | 8 K.VQVSYKGETK.A                         |  |
| HsFlag-FLJ20643_Ti  | 3.242  | 0.241  | 1140.07 | 1139.294 | 5287.2  | 2 | 856.4                                          | 83.3 | 9 K.VQVSYKGETK.A                         |  |
| HsFLAG-FLJ20729_    | 4.0267 | 0.3494 | 1616.65 | 1615.882 | 4580.3  | 1 | 846.5                                          | 76.9 | 19 K.AFYPPEEISSMVLTK.M                   |  |

\*  
\*

|                    |        |        |         |          |         |   |        |      |                                       |
|--------------------|--------|--------|---------|----------|---------|---|--------|------|---------------------------------------|
| HsFlag-NUFIP_Ti_1C | 4.3722 | 0.3972 | 3003.16 | 3003.338 | 5168.8  | 1 | 380.9  | 34.6 | 16 K.EIAEAYLGYPVTVNAVITVPAYFNDSQR.Q   |
| HsFlag-NUFIP_Ti_1C | 4.3601 | 0.2186 | 3004.85 | 3003.338 | 4429.3  | 1 | 419.9  | 29.8 | 7 K.EIAEAYLGYPVTVNAVITVPAYFNDSQR.Q    |
| HsFlag-FLJ20643_Ti | 2.8122 | 0.287  | 1197.73 | 1198.408 | 3228.1  | 7 | 262.1  | 59.1 | 5 K.DAGVIAGLNVLR.I                    |
| HsFLAG-ARP6_Ti_1   | 4.5976 | 0.2685 | 1198.23 | 1198.408 | 6316.9  | 1 | 2167   | 95.5 | 46 K.DAGVIAGLNVLR.I                   |
| HsFlag-FLJ90652_29 | 5.0718 | 0.2176 | 1688.21 | 1688.921 | 6740.8  | 1 | 1838.4 | 51.7 | 10 R.IINEPTAAAIAAYGLDR.T              |
| HsFLAG-ARP6_Ti_1   | 5.4263 | 0.43   | 1689.04 | 1688.921 | 5489.6  | 1 | 1548.3 | 80   | 52 R.IINEPTAAAIAAYGLDR.T              |
| HsFlag-ZnF-HIT2_Ti | 4.6766 | 0.4075 | 1675.9  | 1676.696 | 6824.2  | 1 | 1767   | 76.7 | 48 K.ATAGDTHLGGEDFDNR.L               |
| HsFLAG-TCF3_Ti_1C  | 2.6951 | 0.2599 | 1261.45 | 1262.451 | 5998.8  | 1 | 521.8  | 66.7 | 20 R.LVNHFVEEFK.R                     |
| HsFlag-NUFIP_Ti_2C | 3.8472 | 0.3159 | 1261.56 | 1262.451 | 6150.8  | 1 | 1081.9 | 83.3 | 88 R.LVNHFVEEFK.R                     |
| HsFLAG-ARP5_Ti_1   | 3.5968 | 0.2665 | 1418.17 | 1418.638 | 8699.5  | 1 | 1270.3 | 80   | 23 R.LVNHFVEEFKR.K                    |
| HsFLAG-TCF3_Ti_1C  | 2.8914 | 0.2187 | 1418.62 | 1418.638 | 4140.4  | 1 | 446.4  | 70   | 1 R.LVNHFVEEFKR.K                     |
| HsFlag-FLJ90652_29 | 3.2252 | 0.2635 | 3140.2  | 3139.443 | 4863.5  | 2 | 321.7  | 31.5 | 9 K.RTLSSSTQASLEIDSLFEGIDFYTSITR.A    |
| HsFlag-FLJ90652_29 | 5.3049 | 0.2495 | 3140.26 | 3139.443 | 10318.3 | 1 | 1612.5 | 30.6 | 2 K.RTLSSSTQASLEIDSLFEGIDFYTSITR.A    |
| HsFLAG-ARP6_Ti_1   | 4.809  | 0.3403 | 2983.09 | 2983.256 | 6992.5  | 1 | 683.9  | 36.5 | 22 R.TLSSSTQASLEIDSLFEGIDFYTSITR.A    |
| HsFLAG-ARP6_Ti_1   | 3.982  | 0.2027 | 1543.2  | 1543.686 | 7726    | 1 | 1819.5 | 56.8 | 8 R.ARFEELCSDLFR.S                    |
| HsFLAG-TIP49b_Ti_  | 2.8901 | 0.2543 | 1543.7  | 1543.686 | 5209.7  | 8 | 240.3  | 54.5 | 1 R.ARFEELCSDLFR.S                    |
| HsFlag-FLJ90652_29 | 4.4813 | 0.316  | 1544.45 | 1543.686 | 5279.2  | 1 | 1248.6 | 86.4 | 92 R.ARFEELCSDLFR.S                   |
| HsFLAG-TCF3_Ti_1C  | 3.5157 | 0.2378 | 1316.78 | 1316.419 | 6306.6  | 3 | 1058.7 | 83.3 | 9 R.FEELCSDLFR.S                      |
| HsFLAG-ARP6_Ti_1   | 2.1699 | 0.1805 | 902.57  | 903.02   | 3454.5  | 4 | 265.1  | 64.3 | 2 R.STLEPVEK.A                        |
| HsFLAG-ARP5_Ti_1   | 4.2482 | 0.3486 | 1822.54 | 1823.103 | 7778.4  | 1 | 1337.6 | 62.5 | 3 K.LDKAQIHDLVLVGGSTR.I               |
| HsFlag-FLJ90652_29 | 2.0672 | 0.1951 | 1109.54 | 1110.258 | 2531.8  | 4 | 138.1  | 62.5 | 2 K.LLQDFFNDR.D                       |
| HsFlag-FLJ90652_29 | 3.2581 | 0.2081 | 1110.23 | 1110.258 | 5624    | 1 | 1107.9 | 93.8 | 24 K.LLQDFFNDR.D                      |
| HsFLAG-ARP6_Ti_1   | 4.3587 | 0.1355 | 1580.35 | 1580.784 | 8035.3  | 3 | 1517.8 | 79.2 | 2 K.LLQDFFNDRDLNK.S                   |
| HsFLAG-ARP6_Ti_1   | 6.6812 | 0.5227 | 2303.95 | 2305.608 | 7222.4  | 1 | 2114.5 | 63.6 | 124 K.SINPDEAVAYGAAVQAAILMGDK.S       |
| HsFLAG-ARP6_Ti_1   | 6.7971 | 0.4665 | 2304.11 | 2305.608 | 8353    | 1 | 2965.1 | 46.6 | 47 K.SINPDEAVAYGAAVQAAILMGDK.S        |
| HsFlag-ZnF-HIT2_Ti | 4.7193 | 0.3858 | 3181.8  | 3182.741 | 4851.7  | 1 | 509.4  | 36.7 | 49 K.SENVQDLLLDDVAPLSLGLTAGGVMTALIK.R |
| HsFlag-FLJ90652_29 | 6.8938 | 0.4375 | 3182.31 | 3182.741 | 9881.5  | 1 | 1770.7 | 30.8 | 34 K.SENVQDLLLDDVAPLSLGLTAGGVMTALIK.R |
| HsFLAG-FLJ20309_   | 5.4572 | 0.4673 | 2788.6  | 2788.043 | 9884.1  | 1 | 1776.8 | 37   | 8 K.QTQIFTTYSNQPGLIQQVYEGER.A         |
| HsFlag-ZnF-HIT2_Ti | 4.6245 | 0.4536 | 2788.77 | 2788.043 | 6989.1  | 1 | 643    | 41.3 | 55 K.QTQIFTTYSNQPGLIQQVYEGER.A        |
| HsFlag-NUFIP_Ti_11 | 4.3928 | 0.1486 | 2530.58 | 2531.822 | 9691    | 1 | 877.9  | 43.5 | 21 R.GVPQIEVTFDIDANGILNVTATDK.S       |
| HsFLAG-ARP5_Ti_1   | 3.9737 | 0.4094 | 1953.07 | 1954.162 | 7450.7  | 1 | 1448.8 | 70   | 1 R.MVQEAKEYKADEVQR.E                 |
| HsFLAG-ARP5_Ti_1   | 4.0797 | 0.2004 | 2238.73 | 2239.465 | 6876.7  | 1 | 1014   | 42.6 | 1 R.MVQEAKEYKADEVQRER.V               |
| HsFLAG-TCF3_Ti_1C  | 3.0245 | 0.244  | 1138.56 | 1138.222 | 3708.8  | 1 | 704.6  | 93.8 | 3 K.YKADEVQR.E                        |
| HsFlag-FLJ90652_29 | 4.362  | 0.2456 | 1288.02 | 1288.461 | 6806.6  | 1 | 1526.8 | 90   | 24 K.NALESYAFNMK.S                    |
| HsFLAG-ARP6_Ti_1   | 3.1355 | 0.2732 | 1289.43 | 1288.461 | 4692.1  | 1 | 433.4  | 70   | 18 K.NALESYAFNMK.S                    |
| HsH2AZ-FLAG_293_   | 2.0691 | 0.1958 | 947.37  | 948.018  | 9365.8  | 3 | 803.1  | 68.8 | 4 K.SAVEDEGLK.G                       |
| HsFlag-FLJ90652_29 | 5.4239 | 0.3384 | 1878.5  | 1878.055 | 6692.7  | 1 | 1641.9 | 76.7 | 7 K.CQEVISWLDANTLAEK.D                |
| HsFLAG-TCF3_Ti_1C  | 5.0809 | 0.3353 | 2662.81 | 2663.866 | 9294.5  | 1 | 1178.4 | 50   | 16 K.CQEVISWLDANTLAEKDEFEHK.R         |
| HsFLAG-ARP6_Ti_1   | 4.827  | 0.2512 | 2663.16 | 2663.866 | 5386.4  | 1 | 1085.5 | 39.3 | 34 K.CQEVISWLDANTLAEKDEFEHK.R         |
| HsFLAG-ARP6_Ti_1   | 5.3629 | 0.4095 | 3184.98 | 3185.53  | 7847.8  | 1 | 1127.5 | 29.8 | 2 R.KELEQVCNPIISGLYQQAGGPGGGFQAQGP.K  |
| HsFlag-NUFIP_Ti_1C | 6.1748 | 0.4351 | 3056.95 | 3057.356 | 7304.6  | 1 | 1142   | 43.3 | 49 K.ELEQVCNPIISGLYQQAGGPGGGFQAQGP.K  |
| HsFlag-NUFIP_Ti_1C | 7.6261 | 0.4465 | 3056.96 | 3057.356 | 8868.5  | 1 | 2682.6 | 38.3 | 40 K.ELEQVCNPIISGLYQQAGGPGGGFQAQGP.K  |

|                |                     |        |        |         |          |         |   |        |      |                                                |
|----------------|---------------------|--------|--------|---------|----------|---------|---|--------|------|------------------------------------------------|
| *              | HsFlag-FLJ20643_Ti  | 3.2496 | 0.1945 | 1177.73 | 1178.371 | 8225.3  | 3 | 924.4  | 72.2 | 32 R.FEELLQASK.E                               |
| *              | HsFlag-NUFIP_Ti_1C  | 4.1982 | 0.1758 | 1178.55 | 1178.371 | 6303.6  | 1 | 1516.9 | 88.9 | 118 R.FEELLQASK.E                              |
| *              | HsFlag-NUFIP_Ti_1C  | 4.2842 | 0.378  | 2786.11 | 2787.068 | 6232.6  | 1 | 639.1  | 45.7 | 22 K.ELQQAQTRPESTQIQPQPGFCIK.T                 |
| *              | HsFlag-NUFIP_Ti_1C  | 6.2347 | 0.3241 | 2787.14 | 2787.068 | 5926.7  | 1 | 1032.9 | 37   | 68 K.ELQQAQTRPESTQIQPQPGFCIK.T                 |
| *              | HsFlag-NUFIP_Ti_1C  | 5.7677 | 0.4248 | 3882.79 | 3884.316 | 4664.7  | 1 | 518    | 25   | 44 K.VFINICHSPSIPPPADVTEEELLQMLEEDQAGFR.I      |
| *              | HsFlag-NUFIP_Ti_1C  | 4.8352 | 0.3991 | 1608.24 | 1608.85  | 6233.6  | 1 | 1225.1 | 75   | 19 R.IPMSLGEPHAELDAK.G                         |
| *              | HsFlag-FLJ20643_Ti  | 5.7838 | 0.5136 | 1924.1  | 1924     | 7235.5  | 1 | 1863.7 | 75   | 199 K.QQGCTAYDVAVNSDFYR.R                      |
| *              | HsFlag-FLJ20643_Ti  | 3.1228 | 0.1285 | 1167.58 | 1167.328 | 4725.8  | 1 | 942    | 93.8 | 3 R.RMQNSDFLR.E                                |
| *              | HsFlag-FLJ20643_Ti  | 3.6074 | 0.1166 | 1589.27 | 1586.826 | 7980.4  | 1 | 1010   | 69.2 | 1 R.ELVITAREGLEDK.Y                            |
| *              | HsFlag-FLJ20643_Ti  | 4.4473 | 0.454  | 2005.56 | 2005.194 | 8820.3  | 1 | 1460.2 | 66.7 | 6 R.EGLEDKYNLQLNPEWR.M                         |
| *              | HsFlag-FLJ20643_Ti  | 2.332  | 0.1079 | 1332.68 | 1333.489 | 4363.8  | 1 | 311.3  | 72.2 | 2 K.YNLQLNPEWR.M                               |
| *              | HsFlag-FLJ20643_Ti  | 3.7624 | 0.223  | 1333.66 | 1333.489 | 6776.2  | 2 | 1333.7 | 88.9 | 88 K.YNLQLNPEWR.M                              |
| *              | HsFlag-NUFIP_Ti_11  | 4.9596 | 0.1362 | 1648.87 | 1648.88  | 6865.2  | 3 | 1433.1 | 53.8 | 4 K.NRPFMGSISQQNIR.S                           |
| *              | HsFlag-NUFIP_Ti_1C  | 4.6161 | 0.3975 | 1649.75 | 1648.88  | 5258.2  | 1 | 913.1  | 73.1 | 31 K.NRPFMGSISQQNIR.S                          |
| *              | HsFlag-NUFIP_Ti_11  | 2.5487 | 0.2092 | 1377.45 | 1378.589 | 4488.2  | 1 | 325.9  | 63.6 | 1 R.PFMGSISQQNIR.S                             |
| *              | HsFlag-FLJ20643_Ti  | 4.6205 | 0.4168 | 1530.59 | 1530.721 | 7673.6  | 1 | 1688.3 | 76.9 | 29 R.IQELGDLYTPAPGR.A                          |
| *              | HsFlag-FLJ20643_Ti  | 4.5137 | 0.4176 | 2231.45 | 2229.451 | 6174.5  | 1 | 774.3  | 52.5 | 4 R.IQELGDLYTPAPGRAESGPEK.P                    |
| *              | HsFlag-NUFIP_Ti_1C  | 5.346  | 0.4343 | 1556.9  | 1557.744 | 7295.5  | 1 | 2145   | 82.1 | 288 K.LDGALGLSLEIGENR.L                        |
| *              | HsFlag-NUFIP_Ti_11  | 4.6094 | 0.3335 | 2954.06 | 2953.386 | 6024.7  | 1 | 678.7  | 42   | 8 R.LVMGGPQQLYHLDAYIPLQINSHESK.A               |
| *              | HsFLAG-UTX1_Ti_20   | 5.1651 | 0.2345 | 2954.19 | 2953.386 | 3562.1  | 1 | 714.6  | 37   | 13 R.LVMGGPQQLYHLDAYIPLQINSHESK.A              |
| gij 29788785 r |                     | 37     | 839    | 71.60%  | 444      | 49671   |   |        |      | 4.9 tubulin, beta polypeptide [Homo sapiens]   |
| *              | HsFLAG-ARP6_Ti_1    | 6.5939 | 0.1945 | 3103.06 | 3104.273 | 6031.8  | 1 | 821.5  | 31.7 | 49 K.FWEVISDEHGIDPTGTYHGDSLQLDR.I              |
| *              | HsFlag-FLJ90652_20  | 3.6323 | 0.3152 | 3104.29 | 3104.273 | 4947.3  | 1 | 308.9  | 32.7 | 5 K.FWEVISDEHGIDPTGTYHGDSLQLDR.I               |
| *              | HsFLAG-TIP49b_Ti_   | 2.8634 | 0.2956 | 1301.53 | 1302.426 | 6152.8  | 1 | 570.9  | 63.6 | 10 R.ISVYYNEATGGK.Y                            |
| *              | Hs293Flag-les2_Ti_1 | 3.5162 | 0.2889 | 1302.19 | 1302.426 | 5900    | 1 | 789.5  | 68.2 | 15 R.ISVYYNEATGGK.Y                            |
| *              | HsFLAG-TCF3_Ti_10   | 3.8882 | 0.3998 | 1817.38 | 1818.039 | 8238.1  | 1 | 785    | 50   | 1 R.ISVYYNEATGGKYVPR.A                         |
|                | HsFLAG-ARP6_Ti_1    | 4.2213 | 0.2479 | 1617.4  | 1616.87  | 4265.9  | 1 | 1041.3 | 78.6 | 14 R.AILVDLEPGTMDSVR.S                         |
|                | HsFLAG-ARP6_Ti_1    | 5.3305 | 0.4496 | 2798.59 | 2800.065 | 6948.6  | 1 | 1444.6 | 52   | 59 R.SGPFQIFRPDNFVFGQSGAGNNWAK.G               |
|                | HsFLAG-ARP6_Ti_1    | 7.0292 | 0.3487 | 2802.51 | 2800.065 | 7956.6  | 1 | 2098.3 | 39   | 59 R.SGPFQIFRPDNFVFGQSGAGNNWAK.G               |
|                | HsFLAG-TCF3_Ti_10   | 7.1819 | 0.4728 | 1959.62 | 1960.151 | 9139.8  | 1 | 3610.1 | 82.4 | 73 K.GHYTEGAELVDSVLDVVR.K                      |
|                | HsFLAG-ARP6_Ti_1    | 4.9251 | 0.2887 | 1959.94 | 1960.151 | 7005.8  | 1 | 1288.7 | 41.2 | 34 K.GHYTEGAELVDSVLDVVR.K                      |
|                | HsFLAG-TIP49b_Ti_   | 5.684  | 0.3213 | 2087.63 | 2088.325 | 8116.7  | 1 | 2259   | 51.4 | 39 K.GHYTEGAELVDSVLDVVRK.E                     |
|                | HsSrcap_Ti_206.286  | 6.4593 | 0.361  | 2087.84 | 2088.325 | 9352.8  | 1 | 2739.4 | 72.2 | 25 K.GHYTEGAELVDSVLDVVRK.E                     |
|                | HsYL1_Ti_103.1035   | 2.9392 | 0.1782 | 1078.13 | 1078.17  | 3062.5  | 4 | 568.7  | 85.7 | 4 K.IREEYPDR.I                                 |
|                | HsFLAG-TCF3_Ti_10   | 3.025  | 0.2204 | 2378.62 | 2379.736 | 6966.3  | 1 | 555.3  | 47.4 | 2 K.IREEYPDRIMNTFSVVPSPK.V                     |
|                | HsFlag-VPS71_Ti_10  | 2.5434 | 0.1418 | 1319.6  | 1320.59  | 6897.3  | 9 | 431    | 59.1 | 1 R.IMNTFSVVPSPK.V                             |
|                | HsFLAG-ARP6_Ti_1    | 4.5585 | 0.3954 | 1320.55 | 1320.59  | 7624    | 1 | 1689.8 | 86.4 | 26 R.IMNTFSVVPSPK.V                            |
|                | HsFLAG-ARP6_Ti_1    | 6.4706 | 0.4855 | 4594.76 | 4595.903 | 4988.3  | 1 | 541.4  | 23.7 | 83 K.VSDTVVEPYNATLSVHQLVENTDETYCIDNEALYDICFR.T |
|                | HsFLAG-ARP6_Ti_1    | 4.7805 | 0.3574 | 2709.73 | 2710.041 | 10385.7 | 1 | 1165   | 31.2 | 30 K.LTTPTYGDLNHLVSATMSGVTCLR.F                |
|                | HsFLAG-ARP6_Ti_1    | 5.4731 | 0.383  | 2710.22 | 2710.041 | 8352.5  | 1 | 1412.5 | 47.9 | 39 K.LTTPTYGDLNHLVSATMSGVTCLR.F                |
|                | HsFLAG-ARP6_Ti_1    | 2.1817 | 0.2119 | 1130.19 | 1131.277 | 3484.6  | 1 | 331.1  | 72.2 | 1 R.FPGQLNADLR.K                               |
|                | HsFLAG-ARP6_Ti_1    | 3.1035 | 0.1934 | 1133.31 | 1131.277 | 4537.1  | 1 | 968.3  | 94.4 | 20 R.FPGQLNADLR.K                              |
|                | HsFLAG-ARP6_Ti_1    | 2.7216 | 0.2275 | 1259.45 | 1259.451 | 6377.3  | 1 | 1130.1 | 85   | 3 R.FPGQLNADLRK.L                              |

|               |                     |        |        |         |          |        |                                                      |        |      |                                      |
|---------------|---------------------|--------|--------|---------|----------|--------|------------------------------------------------------|--------|------|--------------------------------------|
|               | Hs293Flag-les2_Ti_1 | 4.1115 | 0.2404 | 1271.88 | 1272.594 | 7432.2 | 1                                                    | 1437.4 | 85   | 9 R.KLAVNMVPPFR.L                    |
|               | HsFLAG-Lin9_Ti_202  | 3.7432 | 0.2947 | 1144.31 | 1144.42  | 4934.2 | 1                                                    | 1119.4 | 94.4 | 37 K.LAVNMVPPFR.L                    |
|               | HsFLAG-ARP6_Ti_1    | 3.784  | 0.2563 | 1621.62 | 1621.94  | 4747.2 | 1                                                    | 1118   | 76.9 | 9 R.LHFFMPGFAPLTSR.G                 |
| *             | HsScrap_Ti_102.301  | 3.7284 | 0.3505 | 1661.17 | 1660.908 | 5522.5 | 2                                                    | 655.5  | 41.1 | 2 R.ALTVPELTQQVFDK.N                 |
| *             | HsFLAG-TCF3_Ti_10   | 3.7064 | 0.1872 | 1662.5  | 1660.908 | 3477.1 | 1                                                    | 666.1  | 75   | 18 R.ALTVPELTQQVFDK.N                |
|               | HsFLAG-ARP6_Ti_1    | 3.1514 | 0.3044 | 1065.99 | 1066.201 | 5998.7 | 1                                                    | 1325.1 | 87.5 | 4 K.NMMAACDPR.H                      |
|               | HsFLAG-ARP6_Ti_1    | 3.3868 | 0.392  | 1040.35 | 1040.25  | 5162.1 | 1                                                    | 1157.4 | 100  | 24 R.YLTVAAVFR.G                     |
|               | Hs293Flag-les2_Ti_1 | 4.5214 | 0.2599 | 1447.29 | 1447.603 | 7900.2 | 2                                                    | 1960.1 | 86.4 | 10 K.EVDEQMLNVQNK.N                  |
|               | HsScrap_Ti_102.174  | 3.2133 | 0.1712 | 1447.35 | 1447.603 | 3682   | 1                                                    | 435.8  | 72.7 | 4 K.EVDEQMLNVQNK.N                   |
|               | HsFLAG-ARP6_Ti_1    | 4.0978 | 0.3327 | 1699.12 | 1697.888 | 5299.1 | 1                                                    | 715    | 61.5 | 39 K.NSSYFVEWIPNNVK.T                |
|               | HsFLAG-TCF3_Ti_10   | 2.8997 | 0.2395 | 1029.45 | 1029.147 | 6481.9 | 1                                                    | 1559.4 | 93.8 | 2 K.TAVCDIPPR.G                      |
| *             | HsFLAG-ARP6_Ti_1    | 5.9778 | 0.4752 | 1871.55 | 1871.202 | 5636.8 | 1                                                    | 1640.2 | 75   | 71 K.MAVTFIGNSTAIQELFK.R             |
| *             | HsFLAG-TCF3_Ti_10   | 3.2954 | 0.3863 | 2026.5  | 2027.389 | 8104.8 | 1                                                    | 876.3  | 52.9 | 1 K.MAVTFIGNSTAIQELFKR.I             |
|               | HsFLAG-ARP6_Ti_1    | 4.1879 | 0.3996 | 1386.16 | 1386.612 | 7897.9 | 1                                                    | 1417.6 | 85   | 10 K.RISEQFTAMFR.R                   |
|               | HsFLAG-ARP6_Ti_1    | 3.7061 | 0.3498 | 1229.27 | 1230.424 | 8240.8 | 1                                                    | 1542.7 | 88.9 | 7 R.ISEQFTAMFR.R                     |
| gi 5453603 re | 38                  | 245    | 70.80% | 535     | 57488    | 6.4    | chaperonin containing TCP1, subunit 2 [Homo sapiens] |        |      |                                      |
| *             | HsFLAG-ARP6_Ti_1    | 5.6078 | 0.2716 | 1518.88 | 1518.837 | 6946   | 1                                                    | 1902.4 | 78.6 | 22 R.LTSFIGAIAIGDLVK.S               |
| *             | HsFLAG-ARP6_Ti_1    | 2.5543 | 0.0907 | 1550.16 | 1549.78  | 5301.5 | 3                                                    | 772    | 60.7 | 1 R.DASLMVTNDGATILK.N                |
| *             | HsFLAG-ARP6_Ti_1    | 6.3079 | 0.4938 | 2288.49 | 2289.502 | 8481.6 | 1                                                    | 2069   | 64.3 | 30 R.VQDDEVDGTTSVTLAAELLR.E          |
| *             | HsFLAG-ARP6_Ti_1    | 5.8733 | 0.3925 | 2289.94 | 2289.502 | 9152.2 | 1                                                    | 2045.3 | 41.7 | 8 R.VQDDEVDGTTSVTLAAELLR.E           |
| *             | HsFLAG-ARP6_Ti_1    | 3.4382 | 0.3048 | 1420.41 | 1420.701 | 3617.6 | 2                                                    | 521.7  | 72.7 | 2 K.KIHPQTIAGWR.E                    |
| *             | HsFLAG-ARP6_Ti_1    | 5.1034 | 0.4073 | 1657.02 | 1657.775 | 8388.1 | 1                                                    | 2235.4 | 76.7 | 2 R.EALLSSAVDHGSDEVK.F               |
| *             | HsFLAG-ARP5_Ti_1    | 4.7643 | 0.553  | 1960.48 | 1961.139 | 5997.3 | 1                                                    | 1020.4 | 61.8 | 1 R.EALLSSAVDHGSDEVKFR.Q             |
| *             | HsFLAG-ARP6_Ti_1    | 5.4988 | 0.382  | 1781.5  | 1783.053 | 8572.2 | 1                                                    | 2757.9 | 80   | 10 K.FRQDLMNIAGTTLSSK.L              |
| *             | HsFLAG-ARP6_Ti_1    | 3.7395 | 0.3096 | 1783.13 | 1783.053 | 6091.6 | 1                                                    | 1122.5 | 46.7 | 1 K.FRQDLMNIAGTTLSSK.L               |
| *             | HsFLAG-ARP6_Ti_1    | 3.7852 | 0.2813 | 1479.22 | 1479.689 | 6208.4 | 1                                                    | 794.7  | 65.4 | 1 R.QDLMNIAGTTLSSK.L                 |
| *             | HsFLAG-ARP5_Ti_1    | 3.734  | 0.3276 | 1493.51 | 1493.79  | 7746   | 1                                                    | 1155.3 | 69.2 | 2 R.LKSGNLEAIHIIK.K                  |
| *             | HsFLAG-ARP6_Ti_1    | 3.5127 | 0.2493 | 1252.45 | 1252.456 | 6236.8 | 2                                                    | 918.3  | 72.7 | 6 K.GSGNLEAIHIIK.K                   |
| *             | HsFLAG-ARP6_Ti_1    | 6.4408 | 0.5542 | 2042.33 | 2042.293 | 9304.7 | 1                                                    | 3074.5 | 75   | 7 K.KLGGSLADSYLDEGFLLDK.K            |
| *             | HsFLAG-ARP6_Ti_1    | 5.0519 | 0.1669 | 2042.76 | 2042.293 | 7261.5 | 3                                                    | 1329.2 | 41.7 | 2 K.KLGGSLADSYLDEGFLLDK.K            |
| *             | HsFLAG-TCF3_Ti_10   | 5.5032 | 0.5338 | 1913.72 | 1914.119 | 9135.3 | 1                                                    | 1814.7 | 64.7 | 9 K.LGGSLADSYLDEGFLLDK.K             |
| *             | HsFLAG-ARP6_Ti_1    | 4.3389 | 0.3762 | 2041.83 | 2042.293 | 4998.8 | 1                                                    | 1351.4 | 47.2 | 2 K.LGGSLADSYLDEGFLLDK.I             |
| *             | HsFLAG-ARP6_Ti_1    | 4.6641 | 0.3401 | 2042.94 | 2042.293 | 7862.9 | 1                                                    | 918.7  | 50   | 3 K.LGGSLADSYLDEGFLLDK.I             |
| *             | HsFLAG-ARP6_Ti_1    | 4.3543 | 0.2203 | 1293.07 | 1292.49  | 6755   | 1                                                    | 1611.7 | 86.4 | 2 K.ILIANTGMDTDK.I                   |
| *             | HsFLAG-p53-DNA-D    | 3.376  | 0.1728 | 1284.36 | 1283.424 | 9860.1 | 1                                                    | 1393.2 | 80   | 6 K.VAEIEHAEKEK.M                    |
| *             | HsFLAG-ARP6_Ti_1    | 3.1884 | 0.3645 | 1131.15 | 1131.246 | 5542.9 | 1                                                    | 1228.1 | 93.8 | 4 K.HGINCFINR.Q                      |
| *             | HsFLAG-ARP5_Ti_1    | 4.8484 | 0.3736 | 3212.41 | 3211.619 | 5225.3 | 1                                                    | 839.6  | 30.4 | 14 R.QLIYNYPEQLFGAAGVMAIEHADFAGVER.L |
| *             | HsFLAG-ARP6_Ti_1    | 5.5575 | 0.4716 | 2097.44 | 2098.404 | 7321.2 | 1                                                    | 1467.7 | 60.5 | 10 R.LALVTGGEIASTFDHPELVK.L          |
| *             | HsFLAG-ARP6_Ti_1    | 4.0822 | 0.284  | 2098.66 | 2098.404 | 3993.5 | 1                                                    | 543.1  | 35.5 | 1 R.LALVTGGEIASTFDHPELVK.L           |
| *             | HsFLAG-ARP5_Ti_1    | 5.7674 | 0.3471 | 3215.32 | 3214.754 | 10919  | 1                                                    | 1238.2 | 28.6 | 1 K.LIEEVMIGEDKLIHFSGVALGEACTIVLR.G  |
| *             | HsFLAG-ARP6_Ti_1    | 5.9259 | 0.5661 | 1956.22 | 1957.29  | 6516.3 | 1                                                    | 2359.2 | 79.4 | 10 K.LIHFSGVALGEACTIVLR.G            |
| *             | HsFLAG-ARP6_Ti_1    | 4.3413 | 0.2248 | 1331.83 | 1331.425 | 8077.5 | 1                                                    | 1577.7 | 81.8 | 1 R.GATQQILDEAER.S                   |
| *             | HsFLAG-ARP6_Ti_1    | 4.9938 | 0.2994 | 1555.39 | 1555.781 | 6431.9 | 1                                                    | 1695.1 | 80.8 | 20 R.SLHDALCVLAQTVK.D                |

|               |                     |        |        |         |          |         |   |        |      |    |                                               |
|---------------|---------------------|--------|--------|---------|----------|---------|---|--------|------|----|-----------------------------------------------|
| *             | HsFLAG-ARP6_Ti_1    | 4.5313 | 0.4281 | 2366.29 | 2367.666 | 8399    | 1 | 949    | 45.2 | 4  | R.TVYGGGCSEMLMAHAVTQLANR.T                    |
| *             | HsFLAG-ARP6_Ti_1    | 4.0331 | 0.3406 | 2366.69 | 2367.666 | 4058.4  | 1 | 633.6  | 34.5 | 1  | R.TVYGGGCSEMLMAHAVTQLANR.T                    |
| *             | HsFLAG-ARP6_Ti_1    | 2.4189 | 0.2359 | 1098.58 | 1099.244 | 4262.3  | 1 | 312.8  | 66.7 | 2  | K.EAVAMESYAK.A                                |
| *             | HsFLAG-ARP6_Ti_1    | 5.3053 | 0.3778 | 2348.32 | 2348.676 | 7932.2  | 1 | 1469.2 | 36.9 | 4  | R.MLPTIIDNAGYDSADLVAQLR.A                     |
| *             | HsFLAG-ARP6_Ti_1    | 6.283  | 0.511  | 2348.55 | 2348.676 | 7091.3  | 1 | 2264.6 | 69   | 14 | R.MLPTIIDNAGYDSADLVAQLR.A                     |
| *             | HsFLAG-ARP6_Ti_1    | 4.5175 | 0.451  | 1531.46 | 1531.64  | 8412.5  | 1 | 1714.2 | 75   | 5  | R.AAHSEGNTTAGLDMR.E                           |
| *             | HsFLAG-ARP6_Ti_1    | 5.2518 | 0.5299 | 2010.51 | 2010.31  | 8675.2  | 1 | 1553.6 | 63.9 | 15 | R.EGTIGDMAILGITESFQVK.R                       |
| *             | HsFLAG-ARP6_Ti_1    | 4.3424 | 0.2743 | 1739.07 | 1740.056 | 6375.6  | 1 | 1963.2 | 55   | 4  | K.RQVLLSAAEAAEVILR.V                          |
| *             | HsFLAG-ARP6_Ti_1    | 4.6365 | 0.2373 | 1740.75 | 1740.056 | 7763.4  | 1 | 1362.7 | 66.7 | 6  | K.RQVLLSAAEAAEVILR.V                          |
| *             | HsFLAG-ARP6_Ti_1    | 5.3266 | 0.3581 | 1583.39 | 1583.869 | 8951.6  | 1 | 2412.5 | 82.1 | 11 | R.QVLLSAAEAAEVILR.V                           |
| *             | HsFLAG-ARP5_Ti_1    | 2.8632 | 0.2353 | 1145.76 | 1146.26  | 4465    | 2 | 626.1  | 75   | 1  | R.KRVPDHHPC.-                                 |
| gi 57013276   |                     | 29     | 591    | 70.70%  | 451      | 50152   |   |        |      |    | 5.1 tubulin, alpha, ubiquitous [Homo sapiens] |
|               | HsSrcap_Ti_205.362  | 5.2798 | 0.4255 | 4301.41 | 4299.657 | 10101.8 | 1 | 671.9  | 20.3 | 1  | R.ECISIHVGQAGVQIGNACWELYCLEHGIQPDGQMPSDK.T    |
|               | HsFLAG-ARP6_Ti_1    | 5.5507 | 0.3763 | 2011.61 | 2009.093 | 9267.4  | 1 | 1408.9 | 57.9 | 84 | K.TIGGGDDSFNTFFSETGAGK.H                      |
|               | HsFLAG-ARP6_Ti_1    | 5.0349 | 0.3    | 1702.67 | 1702.945 | 4531.2  | 1 | 1118.7 | 78.6 | 44 | R.AVFVDLEPTVIDEVR.T                           |
|               | HsFLAG-ARP6_Ti_1    | 4.0678 | 0.2493 | 1703.54 | 1702.945 | 8950.2  | 1 | 1040.6 | 42.9 | 1  | R.AVFVDLEPTVIDEVR.T                           |
|               | HsFLAG-p53-DNA-D    | 3.8546 | 0.3066 | 2415.78 | 2416.655 | 9887    | 1 | 636.1  | 42.5 | 25 | R.QLFHPEQLITGKEDAANNYAR.G                     |
|               | HsSrcap_Ti_204.213  | 5.0964 | 0.4219 | 2416.38 | 2416.655 | 6002.3  | 1 | 934.1  | 37.5 | 18 | R.QLFHPEQLITGKEDAANNYAR.G                     |
|               | HsFLAG-ARP6_Ti_1    | 3.2026 | 0.111  | 1086.33 | 1086.274 | 5676.6  | 1 | 1026.6 | 93.8 | 15 | K.EIIDLVLDL.R                                 |
|               | HsFLAG-ARP6_Ti_1    | 5.5288 | 0.4605 | 3519.46 | 3520.951 | 9178.7  | 1 | 1611.9 | 30.5 | 2  | R.KLADQCTGLQGFLVFHFSFGGGTGSFGTSLLMER.L        |
|               | HsFLAG-ARP6_Ti_1    | 6.8756 | 0.4682 | 3390.27 | 3392.777 | 8761.3  | 1 | 1604.7 | 31.5 | 13 | K.LADQCTGLQGFLVFHFSFGGGTGSFGTSLLMER.L         |
|               | HsScrap_Ti_106.239  | 2.55   | 0.1652 | 1877.45 | 1876.082 | 6295.5  | 1 | 349.4  | 53.6 | 1  | R.RNLDIERPTYTNLNR.L                           |
|               | HsFlag-ZnF-HIT2_Ti_ | 2.9442 | 0.2517 | 1719.52 | 1719.895 | 6354.4  | 3 | 522.7  | 57.7 | 12 | R.NLDIERPTYTNLNR.L                            |
|               | HsFLAG-ARP6_Ti_1    | 5.0973 | 0.4595 | 1487.62 | 1488.768 | 7314.4  | 1 | 1783.7 | 80.8 | 94 | R.LISQIVSSITASLR.F                            |
|               | HsFLAG-Lin9_Ti_20   | 3.9906 | 0.2202 | 1487.96 | 1488.768 | 5903.2  | 1 | 1035.4 | 48.1 | 1  | R.LISQIVSSITASLR.F                            |
|               | HsFLAG-ARP6_Ti_1    | 5.8116 | 0.4265 | 2410.46 | 2410.689 | 5990.7  | 1 | 1327.4 | 60   | 74 | R.FDGALNVDLTEFQTNLVPYPR.I                     |
|               | HsFLAG-ARP6_Ti_1    | 5.1723 | 0.3713 | 2751.88 | 2752.037 | 6388.1  | 1 | 727.7  | 32.6 | 7  | K.AYHEQLSVAEITNACFEPANQMVK.C                  |
|               | HsYL1_Ti_103.2152   | 5.4112 | 0.353  | 2751.97 | 2752.037 | 8492.5  | 1 | 1660.1 | 52.2 | 3  | K.AYHEQLSVAEITNACFEPANQMVK.C                  |
|               | HsFLAG-ARP6_Ti_1    | 3.1777 | 0.2663 | 1250.3  | 1250.43  | 4496.7  | 1 | 907.7  | 93.8 | 7  | K.YMACCLLYR.G                                 |
|               | HsH2AZ-FLAG_293_    | 2.3357 | 0.2535 | 1015.43 | 1016.183 | 6915.1  | 2 | 562    | 72.2 | 14 | K.DVNAAIATIK.T                                |
|               | HsSrcap_Ti_202.001  | 3.6793 | 0.2729 | 1017.71 | 1016.183 | 5879.8  | 1 | 1088.4 | 83.3 | 8  | K.DVNAAIATIK.T                                |
|               | HsSrcap_Ti_205.275  | 4.3851 | 0.1572 | 1742.07 | 1741.953 | 8212.2  | 1 | 1660.4 | 51.9 | 6  | K.RSIQFVDWCPTGFK.V                            |
|               | HsFLAG-ARP6_Ti_1    | 4.7996 | 0.4001 | 1743.87 | 1741.953 | 5585.1  | 1 | 1005.5 | 73.1 | 32 | K.RSIQFVDWCPTGFK.V                            |
|               | HsFLAG-TCF3_Ti_10   | 3.0532 | 0.402  | 1584.47 | 1585.766 | 5401    | 1 | 539.5  | 58.3 | 17 | R.SIQFVDWCPTGFK.V                             |
|               | HsSrcap_Ti_202.297  | 4.5222 | 0.2867 | 1585.72 | 1585.766 | 5721.7  | 1 | 1065.6 | 75   | 43 | R.SIQFVDWCPTGFK.V                             |
|               | HsFLAG-ARP6_Ti_2    | 4.0719 | 0.4153 | 1825.6  | 1826.103 | 3498.4  | 1 | 615.9  | 58.8 | 34 | K.VGINYPPTVVPGGDLAK.V                         |
|               | HsFLAG-ARP6_Ti_1    | 6.0682 | 0.4321 | 1865.52 | 1866.108 | 10861.7 | 1 | 2782.2 | 75   | 18 | R.AVCMLSNTTAAIEAWAR.L                         |
|               | HsFLAG-ARP6_Ti_1    | 4.4765 | 0.3204 | 1867.57 | 1866.108 | 8904.4  | 1 | 1596.3 | 45.3 | 7  | R.AVCMLSNTTAAIEAWAR.L                         |
|               | HsFLAG-ARP6_Ti_1    | 3.7547 | 0.214  | 2330.07 | 2331.521 | 8623.8  | 3 | 888.4  | 34.2 | 2  | R.AFVHWYVGEEMEEGEFSEAR.E                      |
|               | HsFLAG-ARP6_Ti_1    | 4.334  | 0.4395 | 2330.87 | 2331.521 | 6787.1  | 1 | 1352.6 | 57.9 | 3  | R.AFVHWYVGEEMEEGEFSEAR.E                      |
|               | HsFlag-les6_293_Ti_ | 4.6127 | 0.3488 | 2350.09 | 2350.275 | 8478.9  | 1 | 1358.3 | 57.5 | 5  | K.DYEEVGVDSVEGEGEEEGEEY.-                     |
| gi 4504349 re |                     | 10     | 24     | 70.70%  | 147      | 15998   |   |        |      |    | 7.3 beta globin [Homo sapiens]                |
| *             | HsFLAG-RPB5MP_2     | 2.74   | 0.2036 | 933.43  | 933.095  | 5036.3  | 2 | 1074   | 93.8 | 2  | K.SAVTALWGK.V                                 |

|               |                       |        |        |         |          |        |   |                                                                  |      |                                         |
|---------------|-----------------------|--------|--------|---------|----------|--------|---|------------------------------------------------------------------|------|-----------------------------------------|
| *             | HsFLAG-RPB5MP_2       | 4.3112 | 0.3621 | 1315.16 | 1315.426 | 7819.3 | 1 | 1811.5                                                           | 83.3 | 1 K.VNVDEVGGEALGR.L                     |
|               | HsFLAG-RPB5MP_2       | 2.6604 | 0.1379 | 1275.17 | 1275.536 | 4903   | 1 | 1079.9                                                           | 77.8 | 1 R.LLVVYPWTQR.F                        |
|               | HsFLAG-RPB5MP_2       | 5.2862 | 0.3643 | 1798.54 | 1799.08  | 6971.4 | 1 | 1754.5                                                           | 75   | 2 K.KVLGAFSDGLAHLNLIK.G                 |
|               | HsFLAG-RPB5MP_2       | 3.1659 | 0.3061 | 1670.43 | 1670.906 | 9712.9 | 1 | 864.3                                                            | 53.3 | 3 K.VLGAFSDGLAHLNLIK.G                  |
| *             | HsFLAG-RPB5MP_2       | 3.764  | 0.3422 | 1479.55 | 1479.596 | 6253.8 | 6 | 628.6                                                            | 58.3 | 3 K.GTFATLSELHCDK.L                     |
| *             | HsFLAG-RPB5MP_2       | 4.1998 | 0.3122 | 1777.52 | 1778.117 | 7840.5 | 1 | 1264.3                                                           | 66.7 | 2 R.LLGNVLCVLAHFGK.E                    |
| *             | HsFLAG-RPB5MP_2       | 2.903  | 0.307  | 1379.03 | 1379.555 | 5650.6 | 1 | 634.2                                                            | 68.2 | 1 K.EFTPPVQAAYQK.V                      |
|               | HsFLAG-RPB5MP_2       | 3.7251 | 0.3125 | 1150.16 | 1150.366 | 6676.6 | 1 | 1376.6                                                           | 86.4 | 5 K.VVAGVANALAHK.Y                      |
|               | HsFLAG-RPB5MP_2       | 4.2178 | 0.3958 | 1451.37 | 1450.684 | 8857.4 | 1 | 1471.3                                                           | 73.1 | 4 K.VVAGVANALAHKYH.-                    |
| gij4506671 re |                       | 9      | 45     | 70.40%  | 115      | 11665  |   | 4.5 ribosomal protein P2 [Homo sapiens]                          |      |                                         |
|               | HsFLAG-Lin9_Ti_20     | 5.0226 | 0.3727 | 1870.54 | 1870.112 | 8039.2 | 1 | 1332                                                             | 58.3 | 16 R.YVASYLLAALGGNSSPSAK.D              |
|               | HsFLAG-TCF3_Ti_10     | 4.5155 | 0.281  | 1870.97 | 1870.112 | 6879   | 2 | 1610                                                             | 44.4 | 2 R.YVASYLLAALGGNSSPSAK.D               |
| *             | HsFLAG-ARP6_Ti_11     | 3.1562 | 0.3383 | 1546.09 | 1546.674 | 5007.3 | 1 | 479.8                                                            | 73.1 | 1 K.KILDVSVGIEADDDR.L                   |
| *             | HsFLAG-TCF3_Ti_10     | 5.0163 | 0.349  | 1901.87 | 1902.112 | 8863.1 | 1 | 1489.7                                                           | 62.5 | 4 K.KILDVSVGIEADDDR.LNK.V               |
| *             | HsFLAG-ARP6_Ti_11     | 4.101  | 0.3305 | 1902.38 | 1902.112 | 4880.3 | 1 | 1329                                                             | 50   | 1 K.KILDVSVGIEADDDR.LNK.V               |
| *             | HsFlag-les6_293_Ti_10 | 2.7559 | 0.3258 | 1419.14 | 1418.5   | 4935.1 | 1 | 1069.6                                                           | 79.2 | 1 K.ILDSVSVGIEADDDR.L                   |
| *             | HsFLAG-Lin9_Ti_20     | 3.289  | 0.301  | 1256.65 | 1257.429 | 4816.1 | 1 | 425.8                                                            | 63.6 | 5 K.NIEDVIAQGIGK.L                      |
| *             | HsFLAG-p53-DNA-D      | 4.8079 | 0.3147 | 1257.47 | 1257.429 | 7083.3 | 1 | 2078.4                                                           | 86.4 | 12 K.NIEDVIAQGIGK.L                     |
| *             | HsFLAG-ARP6_Ti_11     | 3.9503 | 0.3894 | 2777.06 | 2776.076 | 4529.6 | 1 | 401.6                                                            | 34.4 | 3 K.LASVPAGGAVAVSAAPGSAAPAAGSAPAAAEEK.K |
| gij48762932 r |                       | 45     | 135    | 69.30%  | 548      | 59621  |   | 5.6 chaperonin containing TCP1, subunit 8 (theta) [Homo sapiens] |      |                                         |
|               | HsFLAG-ARP6_Ti_11     | 3.1658 | 0.1703 | 963.27  | 963.183  | 4551.1 | 1 | 918.2                                                            | 93.8 | 1 K.APGFAQMLK.E                         |
| *             | HsFLAG-ARP6_Ti_11     | 2.3012 | 0.3361 | 1307.3  | 1308.436 | 5490.2 | 2 | 313.2                                                            | 55   | 1 K.HFSGLEEVYR.N                        |
| *             | HsFLAG-ARP5_Ti_11     | 3.7186 | 0.3748 | 1308.46 | 1308.436 | 4703.5 | 1 | 1131.9                                                           | 90   | 8 K.HFSGLEEVYR.N                        |
|               | HsFLAG-ARP6_Ti_11     | 4.3182 | 0.364  | 1334.27 | 1334.558 | 6639.1 | 1 | 1699.4                                                           | 86.4 | 5 K.LFVTNDAATILR.E                      |
|               | HsFLAG-ARP6_Ti_11     | 2.5138 | 0.2453 | 1121.44 | 1122.266 | 3301.7 | 3 | 280                                                              | 66.7 | 2 R.ELEVQHPAAK.M                        |
|               | HsFLAG-ARP6_Ti_11     | 2.8744 | 0.2847 | 1122.16 | 1122.266 | 5218.5 | 1 | 591.8                                                            | 77.8 | 2 R.ELEVQHPAAK.M                        |
|               | HsFLAG-ARP6_Ti_11     | 5.2339 | 0.4411 | 1895.48 | 1896.114 | 6267.7 | 1 | 1496.1                                                           | 68.8 | 13 R.IGLSVSEVIEGYEACR.K                 |
| *             | HsFLAG-ARP5_Ti_11     | 4.4781 | 0.3367 | 1740.53 | 1740.973 | 4812.1 | 1 | 972.3                                                            | 71.4 | 4 R.KAHEILPNLVCCSAK.N                   |
| *             | HsFlag-NUFIP_Ti_20    | 3.2562 | 0.3529 | 1612.41 | 1612.799 | 4081   | 1 | 652.6                                                            | 65.4 | 3 K.AHEILPNLVCCSAK.N                    |
| *             | HsFLAG-ARP6_Ti_11     | 3.8507 | 0.1818 | 1613.03 | 1612.799 | 5566.5 | 3 | 1073.9                                                           | 50   | 1 K.AHEILPNLVCCSAK.N                    |
| *             | HsFLAG-ARP6_Ti_11     | 2.8333 | 0.1627 | 1146.27 | 1147.271 | 3867.1 | 3 | 525.4                                                            | 77.8 | 1 R.DIDEVSSLLR.T                        |
| *             | HsFLAG-ARP6_Ti_11     | 3.6741 | 0.1537 | 1146.48 | 1147.271 | 6595   | 4 | 1133.9                                                           | 83.3 | 1 R.DIDEVSSLLR.T                        |
| *             | HsFLAG-ARP6_Ti_11     | 4.1618 | 0.3458 | 2474.52 | 2474.745 | 6486.8 | 1 | 913.4                                                            | 34.5 | 3 K.LIAQACVSIFPDSGHFNVDNIR.V            |
| *             | HsFLAG-ARP6_Ti_11     | 5.5315 | 0.5786 | 1820.57 | 1820.157 | 6330.6 | 1 | 1480.3                                                           | 67.6 | 10 K.ILGSGISSSVLHGMVFK.K                |
| *             | HsFLAG-ARP6_Ti_11     | 3.2091 | 0.3273 | 1833.43 | 1833.072 | 4482.8 | 1 | 504.7                                                            | 53.3 | 2 K.IAVYSCPFDMITETK.G                   |
| *             | HsFLAG-ARP6_Ti_11     | 4.9075 | 0.4001 | 2384.42 | 2385.666 | 6484   | 1 | 1160.7                                                           | 55   | 2 K.TAEELMNFSKGEENLMDAQVK.A             |
| *             | HsFLAG-ARP6_Ti_11     | 5.4024 | 0.4394 | 2385.32 | 2385.666 | 5764.9 | 1 | 1103.1                                                           | 40   | 2 K.TAEELMNFSKGEENLMDAQVK.A             |
| *             | HsFLAG-ARP6_Ti_11     | 2.4727 | 0.2745 | 1372.64 | 1373.549 | 7057.5 | 1 | 448.8                                                            | 46.4 | 2 K.AIADTGANVVVTGGK.V                   |
| *             | HsFLAG-ARP6_Ti_11     | 4.8556 | 0.5084 | 1373.34 | 1373.549 | 8552.4 | 1 | 2276.1                                                           | 78.6 | 3 K.AIADTGANVVVTGGK.V                   |
| *             | HsFLAG-ARP6_Ti_11     | 2.9652 | 0.1945 | 1232.56 | 1233.428 | 5792.6 | 1 | 731.4                                                            | 70   | 1 K.VADMALHYANK.Y                       |
| *             | HsFLAG-ARP6_Ti_11     | 3.7196 | 0.2246 | 1234.11 | 1233.428 | 7902.4 | 1 | 1602.1                                                           | 85   | 3 K.VADMALHYANK.Y                       |
| *             | HsFLAG-ARP6_Ti_11     | 2.7088 | 0.2022 | 909.06  | 909.134  | 5219.6 | 2 | 1186.3                                                           | 91.7 | 1 K.YNIMLVR.L                           |
| *             | HsFLAG-ARP6_Ti_11     | 2.5074 | 0.1647 | 886.23  | 886.039  | 3503.9 | 6 | 689.4                                                            | 81.2 | 1 K.TVGATALPR.L                         |



|                |                    |        |        |         |          |         |   |        |      |                                                |
|----------------|--------------------|--------|--------|---------|----------|---------|---|--------|------|------------------------------------------------|
| *              | HsFLAG-ARP6_Ti_1   | 4.8486 | 0.3453 | 3250.25 | 3250.654 | 9341.6  | 3 | 726.4  | 25   | 2 R.LTPPVLEEMGHCDVSVLSEVGDQVVFVK.H             |
| *              | HsFLAG-ARP6_Ti_1   | 4.0743 | 0.2769 | 1569.39 | 1568.77  | 6811.9  | 1 | 1073.2 | 69.2 | 2 K.HEKEDGAISTIVLR.G                           |
| *              | HsFLAG-ARP6_Ti_1   | 3.4544 | 0.2788 | 1367.33 | 1366.442 | 5578.9  | 2 | 854.5  | 77.3 | 2 R.GSTDNLMDDIER.A                             |
| *              | HsFLAG-ARP6_Ti_1   | 2.336  | 0.3054 | 1065.44 | 1066.156 | 4665    | 2 | 341.9  | 55.6 | 2 R.AVDDGVNTFK.V                               |
| *              | HsFLAG-TCF3_Ti_1   | 4.0566 | 0.2834 | 1511.67 | 1511.762 | 7211.1  | 1 | 980.6  | 60.7 | 7 K.RLVPGGGATEIELAK.Q                          |
| *              | HsFLAG-ARP6_Ti_1   | 4.3901 | 0.3587 | 1511.76 | 1511.762 | 4370.4  | 1 | 999.8  | 51.8 | 1 K.RLVPGGGATEIELAK.Q                          |
| *              | HsFLAG-ARP6_Ti_1   | 5.1959 | 0.4859 | 2057.94 | 2059.246 | 5222.2  | 1 | 1105.6 | 67.6 | 2 K.QITSYGETCPGLEQYAIK.K                       |
| *              | HsFLAG-ARP6_Ti_1   | 4.5843 | 0.4256 | 2186.47 | 2187.421 | 5349.6  | 1 | 871.2  | 58.3 | 2 K.QITSYGETCPGLEQYAIKK.F                      |
| *              | HsFLAG-ARP5_Ti_1   | 3.8814 | 0.2787 | 1279.45 | 1279.481 | 6591.5  | 1 | 1268.8 | 80   | 3 K.KFAEAFEAIPIR.A                             |
| *              | HsFLAG-ARP6_Ti_1   | 2.7507 | 0.1017 | 1150.6  | 1151.307 | 5004.9  | 8 | 501.3  | 72.2 | 1 K.FAEAFEAIPIR.A                              |
| *              | HsFLAG-ARP6_Ti_1   | 4.3663 | 0.2168 | 1151.49 | 1151.307 | 6252.5  | 1 | 1643.2 | 94.4 | 2 K.FAEAFEAIPIR.A                              |
| *              | HsFlag-VPS71_Ti_1  | 2.3948 | 0.106  | 1158.6  | 1159.287 | 5027.4  | 1 | 602.3  | 72.2 | 6 K.LYAVHQEGNK.N                               |
| *              | HsFLAG-ARP6_Ti_1   | 3.0353 | 0.1784 | 1159.2  | 1159.287 | 5981.3  | 1 | 1165.9 | 83.3 | 8 K.LYAVHQEGNK.N                               |
| *              | HsFLAG-ARP6_Ti_1   | 4.6048 | 0.368  | 1454.42 | 1454.663 | 8401.3  | 1 | 2688.5 | 88.5 | 2 K.NVGLDIEAEVPAVK.D                           |
| *              | HsFLAG-ARP5_Ti_1   | 5.08   | 0.3993 | 2975.31 | 2975.424 | 10071.5 | 1 | 1376   | 30.6 | 2 K.NVGLDIEAEVPAVKDMLEAGILDITYLGK.Y            |
| *              | HsFLAG-ARP6_Ti_1   | 5.2161 | 0.3769 | 1539.82 | 1539.784 | 7409.2  | 1 | 2261.6 | 84.6 | 4 K.DMLEAGILDITYLGK.Y                          |
| *              | HsFLAG-ARP6_Ti_1   | 4.0296 | 0.3394 | 1129.36 | 1129.345 | 7433.1  | 1 | 1549.8 | 90   | 2 K.LATNAAVTVLR.V                              |
| *              | HsFLAG-ARP6_Ti_1   | 2.2848 | 0.146  | 917.66  | 918.139  | 7037.5  | 2 | 622.2  | 71.4 | 1 R.VDQIIMAK.P                                 |
| *              | HsFLAG-ARP5_Ti_1   | 3.6068 | 0.337  | 1891.56 | 1892.267 | 5757.5  | 1 | 773.1  | 52.8 | 4 R.VDQIIMAKPAGGPKPPSGK.K                      |
| *              | HsFLAG-ARP5_Ti_1   | 4.0541 | 0.294  | 1892    | 1892.267 | 5963.2  | 9 | 820.8  | 38.9 | 4 R.VDQIIMAKPAGGPKPPSGK.K                      |
| *              | HsFLAG-ARP6_Ti_1   | 2.2569 | 0.1078 | 992.47  | 993.151  | 4476.3  | 3 | 434.7  | 60   | 1 K.PAGGPKPPSGK.K                              |
| *              | HsFLAG-ARP6_Ti_1   | 3.5588 | 0.2555 | 993.73  | 993.151  | 7386.5  | 4 | 1025   | 80   | 3 K.PAGGPKPPSGK.K                              |
| gij 5174735 re |                    | 33     | 691    | 67.60%  | 445      | 49831   |   |        |      | 4.9 tubulin, beta, 2 [Homo sapiens]            |
| *              | HsFLAG-ARP6_Ti_1   | 5.1932 | 0.4341 | 3117.35 | 3118.299 | 6212.7  | 1 | 1002.5 | 34.6 | 14 K.FWEVISDEHGIDPTGTYHGDSLQLER.I              |
| *              | HsFLAG-TCF3_Ti_1   | 2.9907 | 0.2592 | 1328.45 | 1329.452 | 6425.8  | 1 | 548.6  | 63.6 | 5 R.INVYYNEATGGK.Y                             |
| *              | HsFLAG-ARP6_Ti_1   | 3.5519 | 0.3531 | 1329.72 | 1329.452 | 4538.9  | 1 | 1127.3 | 86.4 | 5 R.INVYYNEATGGK.Y                             |
| *              | HsFLAG-TCF3_Ti_1   | 3.9056 | 0.4507 | 1844.35 | 1845.065 | 8563.4  | 1 | 940.3  | 60   | 1 R.INVYYNEATGGKYVPR.A                         |
|                | HsTIP60_Ti_104.237 | 4.1551 | 0.3271 | 1601.63 | 1602.843 | 4487.9  | 1 | 912.8  | 71.4 | 10 R.AVLVDLEPGTMDSVR.S                         |
|                | HsFLAG-ARP6_Ti_1   | 5.3305 | 0.4496 | 2798.59 | 2800.065 | 6948.6  | 1 | 1444.6 | 52   | 59 R.SGPFQIFRPDNFVFGQSGAGNNWAK.G               |
|                | HsFLAG-ARP6_Ti_1   | 7.0292 | 0.3487 | 2802.51 | 2800.065 | 7956.6  | 1 | 2098.3 | 39   | 59 R.SGPFQIFRPDNFVFGQSGAGNNWAK.G               |
|                | HsFLAG-TCF3_Ti_1   | 7.1819 | 0.4728 | 1959.62 | 1960.151 | 9139.8  | 1 | 3610.1 | 82.4 | 73 K.GHYTEGAELVDSVLDVVR.K                      |
|                | HsFLAG-ARP6_Ti_1   | 4.9251 | 0.2887 | 1959.94 | 1960.151 | 7005.8  | 1 | 1288.7 | 41.2 | 34 K.GHYTEGAELVDSVLDVVR.K                      |
|                | HsFLAG-TIP49b_Ti_  | 5.684  | 0.3213 | 2087.63 | 2088.325 | 8116.7  | 1 | 2259   | 51.4 | 39 K.GHYTEGAELVDSVLDVVRK.E                     |
|                | HsSrcap_Ti_206.286 | 6.4593 | 0.361  | 2087.84 | 2088.325 | 9352.8  | 1 | 2739.4 | 72.2 | 25 K.GHYTEGAELVDSVLDVVRK.E                     |
|                | HsYL1_Ti_103.1035  | 2.9392 | 0.1782 | 1078.13 | 1078.17  | 3062.5  | 4 | 568.7  | 85.7 | 4 K.IREEYPDR.I                                 |
|                | HsFLAG-TCF3_Ti_1   | 3.025  | 0.2204 | 2378.62 | 2379.736 | 6966.3  | 1 | 555.3  | 47.4 | 2 K.IREEYPDRIMNTFSVPSPK.V                      |
|                | HsFlag-VPS71_Ti_1  | 2.5434 | 0.1418 | 1319.6  | 1320.59  | 6897.3  | 9 | 431    | 59.1 | 1 R.IMNTFSVPSPK.V                              |
|                | HsFLAG-ARP6_Ti_1   | 4.5585 | 0.3954 | 1320.55 | 1320.59  | 7624    | 1 | 1689.8 | 86.4 | 26 R.IMNTFSVPSPK.V                             |
|                | HsFLAG-ARP6_Ti_1   | 6.4706 | 0.4855 | 4594.76 | 4595.903 | 4988.3  | 1 | 541.4  | 23.7 | 83 K.VSDTVVEPYNATLSVHQLVENTDETYCIDNEALYDICFR.T |
|                | HsFLAG-ARP6_Ti_1   | 4.7805 | 0.3574 | 2709.73 | 2710.041 | 10385.7 | 1 | 1165   | 31.2 | 30 K.LTTPTYGDLNHLVSATMSGVTCLR.F                |
|                | HsFLAG-ARP6_Ti_1   | 5.4731 | 0.383  | 2710.22 | 2710.041 | 8352.5  | 1 | 1412.5 | 47.9 | 39 K.LTTPTYGDLNHLVSATMSGVTCLR.F                |
|                | HsFLAG-ARP6_Ti_1   | 2.1817 | 0.2119 | 1130.19 | 1131.277 | 3484.6  | 1 | 331.1  | 72.2 | 1 R.FPGQLNADLR.K                               |
|                | HsFLAG-ARP6_Ti_1   | 3.1035 | 0.1934 | 1133.31 | 1131.277 | 4537.1  | 1 | 968.3  | 94.4 | 20 R.FPGQLNADLR.K                              |

|             |                     |        |        |         |          |        |   |        |      |                                                       |
|-------------|---------------------|--------|--------|---------|----------|--------|---|--------|------|-------------------------------------------------------|
|             | HsFLAG-ARP6_Ti_1    | 2.7216 | 0.2275 | 1259.45 | 1259.451 | 6377.3 | 1 | 1130.1 | 85   | 3 R.FPQQLNADLRK.L                                     |
|             | Hs293Flag-les2_Ti_1 | 4.1115 | 0.2404 | 1271.88 | 1272.594 | 7432.2 | 1 | 1437.4 | 85   | 9 R.KLAVNMVFPFR.L                                     |
|             | HsFLAG-Lin9_Ti_202  | 3.7432 | 0.2947 | 1144.31 | 1144.42  | 4934.2 | 1 | 1119.4 | 94.4 | 37 K.LAVNMVFPFR.L                                     |
|             | HsFLAG-ARP6_Ti_1    | 3.784  | 0.2563 | 1621.62 | 1621.94  | 4747.2 | 1 | 1118   | 76.9 | 9 R.LHFFMPGFAPLTSR.G                                  |
|             | HsTIP60_Ti_106.282  | 3.611  | 0.2365 | 1693.78 | 1692.968 | 3399.3 | 1 | 640.9  | 75   | 3 R.ALTVPELTQQMFDK.N                                  |
|             | HsFLAG-ARP6_Ti_1    | 3.1514 | 0.3044 | 1065.99 | 1066.201 | 5998.7 | 1 | 1325.1 | 87.5 | 4 K.NMMAACDPR.H                                       |
|             | HsFLAG-ARP6_Ti_1    | 3.3868 | 0.392  | 1040.35 | 1040.25  | 5162.1 | 1 | 1157.4 | 100  | 24 R.YLTVAAVFR.G                                      |
|             | Hs293Flag-les2_Ti_1 | 4.5214 | 0.2599 | 1447.29 | 1447.603 | 7900.2 | 2 | 1960.1 | 86.4 | 10 K.EVDEQMLNVQNK.N                                   |
|             | HsScrap_Ti_102.174  | 3.2133 | 0.1712 | 1447.35 | 1447.603 | 3682   | 1 | 435.8  | 72.7 | 4 K.EVDEQMLNVQNK.N                                    |
|             | HsFLAG-ARP6_Ti_1    | 4.0978 | 0.3327 | 1699.12 | 1697.888 | 5299.1 | 1 | 715    | 61.5 | 39 K.NSSYFVEWIPNNVK.T                                 |
|             | HsFLAG-TCF3_Ti_10   | 2.8997 | 0.2395 | 1029.45 | 1029.147 | 6481.9 | 1 | 1559.4 | 93.8 | 2 K.TAVCDIPPR.G                                       |
|             | HsFLAG-ARP6_Ti_1    | 4.1879 | 0.3996 | 1386.16 | 1386.612 | 7897.9 | 1 | 1417.6 | 85   | 10 K.RISEQFTAMFR.R                                    |
|             | HsFLAG-ARP6_Ti_1    | 3.7061 | 0.3498 | 1229.27 | 1230.424 | 8240.8 | 1 | 1542.7 | 88.9 | 7 R.ISEQFTAMFR.R                                      |
| gi 11968057 | 29                  | 340    | 67.20% | 396     | 45810    |        |   |        |      | 5 ARP6 actin-related protein 6 homolog [Homo sapiens] |
| *           | HsH2AZ-FLAG_293_    | 4.644  | 0.3695 | 2023.56 | 2021.206 | 5296.9 | 1 | 1041.2 | 65.6 | 34 K.IGYSHENVSVIPNCQFR.S                              |
| *           | HsVPS71-FLAG_Ti_1   | 2.6601 | 0.193  | 1279.66 | 1280.42  | 7125.7 | 6 | 488.7  | 65   | 2 K.TFTANQIDEIK.D                                     |
| *           | HsFlag-VPS71_Ti_10  | 3.4598 | 0.1809 | 1281.48 | 1280.42  | 6464.2 | 1 | 985.1  | 80   | 10 K.TFTANQIDEIK.D                                    |
| *           | HsH2AZ-FLAG_293_    | 4.5229 | 0.2685 | 2786.13 | 2787.185 | 6095.6 | 1 | 1131.2 | 35.9 | 6 K.TFTANQIDEIKDPSGLFYILPFQK.G                        |
| *           | HsYL1_Ti_103.3139.  | 4.2352 | 0.2267 | 2787.95 | 2787.185 | 4635.5 | 1 | 556.3  | 43.5 | 6 K.TFTANQIDEIKDPSGLFYILPFQK.G                        |
| *           | HsFLAG-TIP49b_Ti_1  | 3.6805 | 0.1067 | 1526.73 | 1525.787 | 3431.8 | 6 | 458.6  | 62.5 | 7 K.DPSGLFYILPFQK.G                                   |
| *           | HsFLAG-TIP49a_Ti_1  | 4.6696 | 0.3284 | 1526.87 | 1525.787 | 4587.9 | 1 | 1153.1 | 79.2 | 65 K.DPSGLFYILPFQK.G                                  |
| *           | HsFlag-VPS71_Ti_10  | 3.9532 | 0.3283 | 1250.52 | 1250.399 | 5763.9 | 1 | 1194.2 | 88.9 | 6 K.GYLVNWDVQR.Q                                      |
| *           | HsFlag-VPS71_Ti_10  | 3.4547 | 0.2715 | 996.94  | 996.114  | 7016.2 | 9 | 1286   | 83.3 | 16 R.VNAGALSAHR.Y                                     |
| *           | HsFlag-VPS71_Ti_10  | 4.8727 | 0.4036 | 3471.7  | 3470.761 | 6903.6 | 1 | 1275.9 | 30.6 | 1 R.YFRDNPSELCCIIIVDSGYSFTHIVPYCR.S                   |
| *           | HsH2AZ-FLAG_293_    | 3.4104 | 0.1721 | 1790.56 | 1792.063 | 5959.5 | 1 | 633.2  | 57.1 | 7 R.QLHVMDETHVINQV.K.E                                |
| *           | HsH2AZ-FLAG_293_    | 4.8476 | 0.286  | 3353.03 | 3354.685 | 8199.3 | 1 | 1019.1 | 31.7 | 3 R.QLHVMDETHVINQVKEDVCYVSQDFYR.D                     |
| *           | HsSrcap_Ti_202.008  | 4.1099 | 0.4546 | 1580.83 | 1581.645 | 5550.4 | 1 | 1122.5 | 81.8 | 30 K.EDVCYVSQDFYR.D                                   |
| *           | HsFlag-VPS71_Ti_10  | 2.3466 | 0.265  | 1581.68 | 1581.645 | 2987.2 | 3 | 223.9  | 59.1 | 1 K.EDVCYVSQDFYR.D                                    |
| *           | HsFLAG-TIP49b_Ti_1  | 5.9355 | 0.4708 | 2411.93 | 2413.788 | 8949.3 | 1 | 2151   | 62.5 | 32 K.LKGEENTVMIDYVLPDFSTIK.K                          |
| *           | HsFlag-VPS71_Ti_10  | 4.4822 | 0.4705 | 2172.79 | 2172.455 | 6428.1 | 1 | 691    | 47.2 | 4 K.GEENTVMIDYVLPDFSTIK.K                             |
| *           | HsFlag-VPS71_Ti_10  | 2.621  | 0.0936 | 894.64  | 893.043  | 3909.8 | 2 | 664    | 100  | 2 K.KGFCKPR.E                                         |
| *           | HsFlag-VPS71_Ti_10  | 3.9922 | 0.2033 | 1638.6  | 1638.888 | 7206.1 | 1 | 1409.5 | 76.9 | 4 K.GFCKPREEMVLSGK.Y                                  |
| *           | HsFLAG-TIP49a_Ti_1  | 3.4002 | 0.211  | 1147.43 | 1146.347 | 5929.7 | 2 | 1057.3 | 83.3 | 8 K.PREEMVLSGK.Y                                      |
| *           | HsFlag-VPS71_Ti_10  | 2.632  | 0.2339 | 893.65  | 893.043  | 3385   | 3 | 312.2  | 78.6 | 5 R.EEMVLSGK.Y                                        |
| *           | HsFlag-VPS71_Ti_10  | 3.9724 | 0.1281 | 4691.68 | 4691.413 | 6724.3 | 1 | 466.7  | 18.8 | 5 R.FAVPEILFNPSDIGIQEMGIPEAIVYSIQNLPEEMQPHFFK.N       |
| *           | HsYL1-FLAG_Ti_206   | 4.0162 | 0.327  | 1591.82 | 1592.838 | 2697.8 | 1 | 219.6  | 64.3 | 14 K.NIVLTGGNSLFPGF.R.D                               |
| *           | HsSrcap_Ti_202.315  | 4.9657 | 0.3716 | 1593.11 | 1592.838 | 6676.9 | 1 | 1358.5 | 75   | 43 K.NIVLTGGNSLFPGF.R.D                               |
| *           | HsFLAG-ARP6_Ti_1    | 3.8897 | 0.29   | 2925.48 | 2926.215 | 5947.6 | 1 | 427.9  | 36   | 20 R.CLTPTDYDVSVLPENPITYAWEGGK.L                      |
| *           | HsFlag-VPS71_Ti_10  | 3.5363 | 0.308  | 1783.51 | 1783.948 | 9129.9 | 1 | 1318   | 64.3 | 3 K.LISENDDFEDM/VVTR.E                                |
| *           | HsFlag-VPS71_Ti_10  | 3.9237 | 0.2161 | 3490.19 | 3490.61  | 7921   | 1 | 714    | 25   | 1 K.LISENDDFEDM/VVTR/EDYEENGH/SVCEEK.F                |
| *           | HsFlag-VPS71_Ti_10  | 4.0736 | 0.2295 | 3865.54 | 3866.035 | 9305.2 | 1 | 669.5  | 22.6 | 2 K.LISENDDFEDM/VVTR/EDYEENGH/SVCEEK/FDI.-            |
| *           | HsFLAG-ARP6_Ti_2    | 3.2646 | 0.2304 | 1725.97 | 1725.686 | 9308.7 | 1 | 1008.7 | 61.5 | 1 R.EDYEENGH/SVCEEK.F                                 |
| *           | HsH2AZ-FLAG_293_    | 2.9474 | 0.1952 | 2100.34 | 2101.11  | 7322.8 | 1 | 661.5  | 53.1 | 2 R.EDYEENGH/SVCEEK/FDI.-                             |

|                      |        |        |         |          |         |                                                         |        |      |    |                                          |
|----------------------|--------|--------|---------|----------|---------|---------------------------------------------------------|--------|------|----|------------------------------------------|
| gi 14389309 r        | 26     | 503    | 66.80%  | 449      | 49895   | 5.1 tubulin alpha 6 [Homo sapiens]                      |        |      |    |                                          |
| HsSrcap_Ti_205.362   | 5.2798 | 0.4255 | 4301.41 | 4299.657 | 10101.8 | 1                                                       | 671.9  | 20.3 | 1  | R.ECISIHVGQAGVQIGNACWELYCLEHQIPDGMPSDK.T |
| HsFLAG-ARP6_Ti_1     | 5.5507 | 0.3763 | 2011.61 | 2009.093 | 9267.4  | 1                                                       | 1408.9 | 57.9 | 84 | K.TIGGGDDSFNTFFSETGAGK.H                 |
| HsFLAG-ARP6_Ti_1     | 5.0349 | 0.3    | 1702.67 | 1702.945 | 4531.2  | 1                                                       | 1118.7 | 78.6 | 44 | R.AVFVDLEPTVIDEVR.T                      |
| HsFLAG-ARP6_Ti_1     | 4.0678 | 0.2493 | 1703.54 | 1702.945 | 8950.2  | 1                                                       | 1040.6 | 42.9 | 1  | R.AVFVDLEPTVIDEVR.T                      |
| HsFLAG-p53-DNA-D     | 3.8546 | 0.3066 | 2415.78 | 2416.655 | 9887    | 1                                                       | 636.1  | 42.5 | 25 | R.QLFHPEQLITGKEDAANNYAR.G                |
| HsSrcap_Ti_204.213   | 5.0964 | 0.4219 | 2416.38 | 2416.655 | 6002.3  | 1                                                       | 934.1  | 37.5 | 18 | R.QLFHPEQLITGKEDAANNYAR.G                |
| HsFLAG-ARP6_Ti_1     | 3.2026 | 0.111  | 1086.33 | 1086.274 | 5676.6  | 1                                                       | 1026.6 | 93.8 | 15 | K.EIIDLVLDLDR.I                          |
| HsFLAG-ARP6_Ti_1     | 5.5288 | 0.4605 | 3519.46 | 3520.951 | 9178.7  | 1                                                       | 1611.9 | 30.5 | 2  | R.KLADQCTGLQGFLVFHSFGGGTSGGFTSLLMER.L    |
| HsFLAG-ARP6_Ti_1     | 6.8756 | 0.4682 | 3390.27 | 3392.777 | 8761.3  | 1                                                       | 1604.7 | 31.5 | 13 | K.LADQCTGLQGFLVFHSFGGGTSGGFTSLLMER.L     |
| HsScrap_Ti_106.239   | 2.55   | 0.1652 | 1877.45 | 1876.082 | 6295.5  | 1                                                       | 349.4  | 53.6 | 1  | R.RNLDIRPTYTNLNR.L                       |
| HsFlag-ZnF-HIT2_Ti_1 | 2.9442 | 0.2517 | 1719.52 | 1719.895 | 6354.4  | 3                                                       | 522.7  | 57.7 | 12 | R.NLDIERPTYTNLNR.L                       |
| HsFLAG-ARP6_Ti_1     | 5.0973 | 0.4595 | 1487.62 | 1488.768 | 7314.4  | 1                                                       | 1783.7 | 80.8 | 94 | R.LISQIVSSITASLR.F                       |
| HsFLAG-Lin9_Ti_202   | 3.9906 | 0.2202 | 1487.96 | 1488.768 | 5903.2  | 1                                                       | 1035.4 | 48.1 | 1  | R.LISQIVSSITASLR.F                       |
| HsFLAG-ARP6_Ti_1     | 5.8116 | 0.4265 | 2410.46 | 2410.689 | 5990.7  | 1                                                       | 1327.4 | 60   | 74 | R.FDGLNVDLTEFQTNLVPYPR.I                 |
| HsFLAG-ARP6_Ti_1     | 3.5186 | 0.2052 | 2767.53 | 2766.064 | 5720.2  | 1                                                       | 592.4  | 30.4 | 1  | K.AYHEQLTVAEITNACFEPANQMVK.C             |
| HsFLAG-ARP6_Ti_1     | 3.1777 | 0.2663 | 1250.3  | 1250.43  | 4496.7  | 1                                                       | 907.7  | 93.8 | 7  | K.YMACCLLYR.G                            |
| HsH2AZ-FLAG_293_     | 2.3357 | 0.2535 | 1015.43 | 1016.183 | 6915.1  | 2                                                       | 562    | 72.2 | 14 | K.DVNAAIATIK.T                           |
| HsSrcap_Ti_202.001   | 3.6793 | 0.2729 | 1017.71 | 1016.183 | 5879.8  | 1                                                       | 1088.4 | 83.3 | 8  | K.DVNAAIATIK.T                           |
| HsSrcap_Ti_205.279   | 4.5969 | 0.4286 | 1755.42 | 1755.98  | 5429.1  | 1                                                       | 785.6  | 65.4 | 26 | K.RTIQFVDWCPTGFK.V                       |
| HsSrcap_Ti_205.280   | 4.8872 | 0.2348 | 1757.48 | 1755.98  | 8327.5  | 1                                                       | 2242.3 | 57.7 | 10 | K.RTIQFVDWCPTGFK.V                       |
| HsSrcap_Ti_202.300   | 2.6402 | 0.345  | 1598.54 | 1599.793 | 6635.7  | 1                                                       | 411.8  | 50   | 2  | R.TIQFVDWCPTGFK.V                        |
| HsFLAG-TCF3_Ti_10    | 4.0211 | 0.3559 | 1599.41 | 1599.793 | 6154.4  | 1                                                       | 984.8  | 70.8 | 8  | R.TIQFVDWCPTGFK.V                        |
| HsFLAG-ARP6_Ti_2     | 4.0719 | 0.4153 | 1825.6  | 1826.103 | 3498.4  | 1                                                       | 615.9  | 58.8 | 34 | K.VGINYQPPTVPGDLAK.V                     |
| HsFLAG-ARP6_Ti_1     | 3.7547 | 0.214  | 2330.07 | 2331.521 | 8623.8  | 3                                                       | 888.4  | 34.2 | 2  | R.AFVHWYVGEEMEEGFSEAR.E                  |
| HsFLAG-ARP6_Ti_1     | 4.334  | 0.4395 | 2330.87 | 2331.521 | 6787.1  | 1                                                       | 1352.6 | 57.9 | 3  | R.AFVHWYVGEEMEEGFSEAR.E                  |
| HsTIP60_Ti_101.185   | 5.112  | 0.4792 | 2080.32 | 2079.947 | 11152   | 1                                                       | 1820.3 | 61.1 | 3  | K.DYEEVGADSADGEDEGEEY.-                  |
| gi 31542680 r        | 48     | 643    | 66.70%  | 607      | 68241   | 5.2 ARP5 actin-related protein 5 homolog [Homo sapiens] |        |      |    |                                          |
| HsFLAG-ARP5_Ti_1     | 2.9357 | 0.1722 | 1054.18 | 1053.267 | 4864.4  | 1                                                       | 911.6  | 93.8 | 2  | -.MAANVPFR.D                             |
| HsFLAG-TCF3_Ti_10    | 3.6556 | 0.3941 | 3133.06 | 3134.605 | 4722.8  | 1                                                       | 481.1  | 38.3 | 21 | R.AAPDPVLEAGPVAHGPLPVPLVDNGSFQVR.A       |
| HsFLAG-TCF3_Ti_10    | 5.8306 | 0.4279 | 3134.31 | 3134.605 | 6648.3  | 1                                                       | 1359.2 | 34.2 | 60 | R.AAPDPVLEAGPVAHGPLPVPLVDNGSFQVR.A       |
| HsFLAG-TCF3_Ti_10    | 3.8247 | 0.3023 | 1595.32 | 1595.678 | 4497.9  | 1                                                       | 863.8  | 71.4 | 7  | R.AGWACPGQDPGPEPR.L                      |
| HsFLAG-TCF3_Ti_10    | 4.6302 | 0.3905 | 1723.6  | 1723.927 | 6008.5  | 1                                                       | 1023.2 | 61.8 | 21 | R.GASGPQVGNALGSLEPLR.W                   |
| HsFLAG-ARP5_Ti_1     | 4.5705 | 0.3305 | 1848.2  | 1847.161 | 6585.2  | 1                                                       | 1164.1 | 67.9 | 9  | R.QMMSELLFECYGIK.V                       |
| HsFLAG-ARP5_Ti_1     | 4.1009 | 0.3474 | 1985.59 | 1987.265 | 8175.8  | 1                                                       | 1061   | 56.2 | 25 | K.VAYGIDSLFSFYHNKPK.N                    |
| HsFLAG-ARP8_Ti_2     | 4.5637 | 0.3757 | 2792.9  | 2794.127 | 7153.4  | 1                                                       | 892.4  | 43.8 | 6  | K.NSMCSGLIISGGYQCTHVLPILEGR.L            |
| HsFLAG-ARP8_Ti_2     | 4.3186 | 0.3706 | 2795.14 | 2794.127 | 6844.2  | 1                                                       | 764.1  | 30.2 | 3  | K.NSMCSGLIISGGYQCTHVLPILEGR.L            |
| HsFLAG-ARP5_Ti_1     | 4.8683 | 0.3492 | 1604.21 | 1604.809 | 6808.6  | 1                                                       | 1130.7 | 71.4 | 7  | K.RINLGGQAAGYLQR.L                       |
| HsFlag-FLJ90652_29   | 5.3206 | 0.4376 | 1448.19 | 1448.622 | 8396.6  | 1                                                       | 2255.4 | 84.6 | 19 | R.INLGGQAAGYLQR.L                        |
| HsFLAG-TCF3_Ti_10    | 3.1152 | 0.3514 | 1448.61 | 1448.622 | 3598.4  | 5                                                       | 161.3  | 50   | 3  | R.INLGGQAAGYLQR.L                        |
| HsFLAG-ARP5_Ti_1     | 3.2037 | 0.2493 | 1298.62 | 1299.516 | 5163.5  | 1                                                       | 636.5  | 68.2 | 7  | K.YPGHLAAITLSR.M                         |
| HsFLAG-ARP8_Ti_2     | 4.4572 | 0.3908 | 1298.94 | 1299.516 | 6753    | 1                                                       | 1926.9 | 90.9 | 28 | K.YPGHLAAITLSR.M                         |
| HsFLAG-ARP5_Ti_1     | 3.7188 | 0.0886 | 1299.64 | 1299.516 | 6935.2  | 1                                                       | 1741.9 | 59.1 | 1  | K.YPGHLAAITLSR.M                         |

|                |                     |        |        |         |          |         |   |        |      |                                                                        |
|----------------|---------------------|--------|--------|---------|----------|---------|---|--------|------|------------------------------------------------------------------------|
| *              | HsFLAG-ARP5_Ti_1    | 6.7824 | 0.4162 | 2615.25 | 2615.874 | 8274.7  | 1 | 2425.6 | 45   | 26 R.MEEILHEHSYIAEDYVEELHK.W                                           |
| *              | HsFLAG-ARP5_Ti_1    | 6.0855 | 0.4807 | 2958.25 | 2958.274 | 9159    | 1 | 1202.8 | 35.2 | 3 R.MEEILHEHSYIAEDYVEELHKWR.C                                          |
| *              | HsFLAG-ARP5_Ti_1    | 3.5377 | 0.2024 | 1438.38 | 1439.49  | 8801.9  | 1 | 1328.1 | 80   | 5 R.CPDYYENNVHK.M                                                      |
| *              | HsFLAG-ARP5_Ti_1    | 2.8725 | 0.3129 | 1179.42 | 1178.325 | 4549.1  | 1 | 675    | 80   | 2 K.LLGSTLTSEEK.Q                                                      |
| *              | HsFLAG-ARP5_Ti_1    | 3.9203 | 0.3154 | 1591.59 | 1591.759 | 6454.1  | 1 | 889.5  | 65.4 | 11 K.LLGSTLTSEEKQER.L                                                  |
| *              | HsFLAG-ARP5_Ti_1    | 4.0542 | 0.1471 | 2206.47 | 2207.506 | 3691    | 1 | 723.3  | 42.6 | 6 R.LLYVQELLE DGQMDQFHK.A                                              |
| *              | HsFLAG-ARP5_Ti_1    | 5.2725 | 0.3184 | 2206.5  | 2207.506 | 7513.7  | 1 | 1134.3 | 61.8 | 19 R.LLYVQELLE DGQMDQFHK.A                                             |
| *              | HsFLAG-TCF3_Ti_1    | 5.9178 | 0.4549 | 2221.44 | 2222.515 | 7116.6  | 1 | 2118   | 72.2 | 15 K.ALIELNMD SPEELQSYIQK.L                                            |
| *              | HsFLAG-ARP5_Ti_1    | 5.3129 | 0.2534 | 2221.55 | 2222.515 | 10159.5 | 2 | 1838.7 | 41.7 | 2 K.ALIELNMD SPEELQSYIQK.L                                             |
| *              | HsFLAG-FLJ20309_    | 2.3125 | 0.1947 | 958.56  | 959.131  | 7258.2  | 2 | 599.3  | 68.8 | 5 K.LSIAVEQAK.Q                                                        |
| *              | HsFLAG-ARP5_Ti_1    | 3.1008 | 0.1783 | 959.11  | 959.131  | 5362.4  | 1 | 1112   | 93.8 | 4 K.LSIAVEQAK.Q                                                        |
| *              | HsFLAG-ARP8_Ti_2    | 4.4742 | 0.3492 | 2589.34 | 2588.969 | 6138.3  | 1 | 1019.9 | 37.5 | 2 K.PVTTVQPVFNLAAYHQLFVGTER.I                                          |
| *              | HsFLAG-ARP5_Ti_1    | 6.8296 | 0.477  | 3386.74 | 3385.885 | 9613.6  | 1 | 1725.3 | 31   | 4 R.IRAPEIIFQPSLIGEEQAGIAETLQYILDR.Y                                   |
| *              | HsFlag-FLJ90652_2   | 7.0808 | 0.4529 | 3774.58 | 3774.352 | 8275.3  | 1 | 1868   | 31.2 | 8 R.IRAPEIIFQPSLIGEEQAGIAETLQYILDRYPK.D                                |
| *              | HsFLAG-ARP5_Ti_1    | 2.9859 | 0.2443 | 3115.43 | 3116.538 | 6040.9  | 2 | 313.1  | 29.6 | 1 R.APEIIFQPSLIGEEQAGIAETLQYILDR.Y                                     |
| *              | HsFLAG-FLJ20309_    | 4.5769 | 0.4812 | 3116.57 | 3116.538 | 11597.1 | 1 | 1718.4 | 31.5 | 4 R.APEIIFQPSLIGEEQAGIAETLQYILDR.Y                                     |
| *              | HsFLAG-FLJ20309_    | 6.2168 | 0.418  | 3504.65 | 3505.005 | 4789.2  | 1 | 797    | 31.7 | 37 R.APEIIFQPSLIGEEQAGIAETLQYILDRYPK.D                                 |
| *              | HsFLAG-ARP5_Ti_1    | 4.9714 | 0.3899 | 2573.49 | 2574     | 7902.3  | 1 | 2159.7 | 59.1 | 2 K.DVQEMLVQNVFLTGGNTMYPGMK.A                                          |
| *              | HsFLAG-ARP5_Ti_1    | 3.0988 | 0.1167 | 1579.44 | 1579.916 | 9251.3  | 1 | 966.9  | 72.7 | 1 R.MEKELLEMRPFR.S                                                     |
| *              | HsFLAG-ARP5_Ti_1    | 5.6024 | 0.4082 | 2209.42 | 2210.454 | 10986.6 | 1 | 2376.1 | 43.4 | 17 R.SSFVQLASNPVLD AWYGAR.D                                            |
| *              | HsFLAG-ARP5_Ti_1    | 6.0082 | 0.445  | 2210.69 | 2210.454 | 6755.5  | 1 | 1513.1 | 63.2 | 98 R.SSFVQLASNPVLD AWYGAR.D                                            |
| *              | HsFLAG-ARP5_Ti_1    | 5.6651 | 0.4526 | 1997.52 | 1998.162 | 8515    | 1 | 2171.6 | 76.7 | 81 R.DWALNHLDDNEVWITR.K                                                |
| *              | HsFLAG-ARP5_Ti_1    | 4.3808 | 0.2974 | 1997.77 | 1998.162 | 5228.9  | 1 | 1252.2 | 50   | 10 R.DWALNHLDDNEVWITR.K                                                |
| *              | HsFLAG-ARP5_Ti_1    | 4.8409 | 0.4197 | 2124.52 | 2126.336 | 10892.3 | 1 | 1577.5 | 59.4 | 1 R.DWALNHLDDNEVWITR.K.E                                               |
| *              | HsFLAG-ARP5_Ti_1    | 4.8337 | 0.3509 | 2125.86 | 2126.336 | 7140.8  | 1 | 1312   | 45.3 | 12 R.DWALNHLDDNEVWITR.K.E                                              |
| *              | HsFLAG-ARP5_Ti_1    | 4.2965 | 0.348  | 2785.73 | 2786.036 | 11377.3 | 1 | 1037.1 | 31.8 | 1 K.EYEEKGGEYLKEHCASNIYVPIR.L                                          |
| *              | HsFLAG-ARP5_Ti_1    | 4.3656 | 0.2411 | 3123.51 | 3124.486 | 10657.4 | 1 | 878.8  | 26   | 2 K.EYEEKGGEYLKEHCASNIYVPIRLPK.Q                                       |
| *              | HsFLAG-ARP5_Ti_1    | 5.2292 | 0.4025 | 2106.17 | 2107.34  | 6894    | 1 | 1779.3 | 67.6 | 3 K.GGEYLKEHCASNIYVPIR.L                                               |
| *              | HsFLAG-ARP5_Ti_1    | 4.609  | 0.2436 | 2106.69 | 2107.34  | 7466.5  | 1 | 938.1  | 36.8 | 6 K.GGEYLKEHCASNIYVPIR.L                                               |
| *              | HsFLAG-ARP5_Ti_1    | 4.2802 | 0.4221 | 2444.89 | 2445.79  | 6957.9  | 1 | 993.4  | 52.5 | 4 K.GGEYLKEHCASNIYVPIRLPK.Q                                            |
| *              | HsFLAG-ARP5_Ti_1    | 4.2462 | 0.3274 | 2445.67 | 2445.79  | 7180.1  | 1 | 783.7  | 33.8 | 10 K.GGEYLKEHCASNIYVPIRLPK.Q                                           |
| *              | HsFLAG-FLJ20309_    | 3.5453 | 0.3432 | 1459.53 | 1459.611 | 10532.9 | 1 | 1258.3 | 68.2 | 2 K.EHCASNIYVPIR.L                                                     |
| *              | Hs293Flag-les2_Ti_1 | 4.7875 | 0.2817 | 1797.03 | 1798.061 | 7344    | 1 | 1176.2 | 67.9 | 20 K.EHCASNIYVPIRLPK.Q                                                 |
| gij 52632383 r |                     | 26     | 146    | 66.20%  | 589      | 64133   |   |        |      | 8.2 heterogeneous nuclear ribonucleoprotein L isoform a [Homo sapiens] |
| *              | HsFLAG-p53-DNA-D    | 2.701  | 0.1531 | 1299.73 | 1299.385 | 6378.6  | 1 | 1007.1 | 75   | 3 R.YYGGGSEGGRAPK.R                                                    |
| *              | HsFLAG-FLJ20729_    | 7.1048 | 0.4474 | 2981.82 | 2982.883 | 9868.9  | 1 | 1263.8 | 26.5 | 1 K.TDNAGDQHGGGGGGGGGAGAAGGGGGGENYDDPHK.T                              |
| *              | HsFLAG-FLJ20729_    | 3.5673 | 0.244  | 1077.35 | 1077.272 | 5334.6  | 1 | 921.5  | 88.9 | 15 K.TPASPVVHIR.G                                                      |
| *              | HsFLAG-p53-DNA-D    | 5.3204 | 0.4201 | 3089.15 | 3089.614 | 7603.4  | 1 | 999.4  | 39.3 | 2 R.GLIDGVVEADLVEALQEFGPISYVVVMPK.K                                    |
| *              | HsFlag-VPS71_Ti_1   | 6.5737 | 0.4153 | 3090.19 | 3089.614 | 7736.7  | 1 | 1929.6 | 36.6 | 12 R.GLIDGVVEADLVEALQEFGPISYVVVMPK.K                                   |
| *              | HsFLAG-p53-DNA-D    | 5.2966 | 0.4182 | 4389.27 | 4390.775 | 5953.7  | 1 | 1022.5 | 26.3 | 8 .I                                                                   |
| *              | HsFlag-DPCD_Ti_20   | 2.5658 | 0.1898 | 1204.4  | 1205.227 | 3967    | 7 | 513.2  | 70   | 1 K.ISRPGDSDDSR.S                                                      |
| *              | HsFLAG-Lin9_Ti_20   | 4.9404 | 0.3755 | 3870.55 | 3870.41  | 8887.5  | 1 | 961.7  | 23.5 | 6 R.SVNSVLLFTILNPIYSITTDVLYTICNPGPVQR.I                                |
| *              | HsFLAG-ARP6_Ti_1    | 4.3773 | 0.3767 | 1867.33 | 1867.044 | 6592.4  | 1 | 1745.3 | 75   | 2 K.NGVQAMVEFDSVQSAQR.A                                                |

|                      |        |        |         |          |         |                                                       |        |      |                                           |
|----------------------|--------|--------|---------|----------|---------|-------------------------------------------------------|--------|------|-------------------------------------------|
| HsFLAG-Lin9_Ti_20'   | 4.395  | 0.3827 | 1729.72 | 1730.845 | 6013.8  | 1                                                     | 1261   | 70   | 6 K.ASLNGADIYSGCCTLK.I                    |
| HsFLAG-ARP6_Ti_1     | 6.5887 | 0.4485 | 3336.87 | 3337.5   | 8369.5  | 1                                                     | 1983.4 | 35.3 | 2 R.LNVFKNDQDWDYTNPNLSGQGDPGSNPNK.R       |
| HsFLAG-p53-DNA-D     | 4.8912 | 0.3664 | 3492.72 | 3493.687 | 6498.2  | 1                                                     | 972.8  | 30.8 | 1 R.LNVFKNDQDWDYTNPNLSGQGDPGSNPNK.R.Q     |
| HsFLAG-Lin9_Ti_20'   | 4.6102 | 0.2579 | 2735.19 | 2735.753 | 8434.7  | 1                                                     | 809.1  | 30.2 | 1 K.NDQDWDYTNPNLSGQGDPGSNPNK.R            |
| HsFLAG-Lin9_Ti_20'   | 4.5005 | 0.4405 | 2736.24 | 2735.753 | 6742.2  | 1                                                     | 1132.8 | 50   | 5 K.NDQDWDYTNPNLSGQGDPGSNPNK.R            |
| HsFLAG-p53-DNA-D     | 2.6483 | 0.3336 | 908.33  | 908.066  | 2797.9  | 4                                                     | 390    | 81.2 | 3 R.MGPPVGGHR.R                           |
| HsFLAG-Lin9_Ti_20'   | 5.3022 | 0.3694 | 1589.53 | 1589.797 | 5876.7  | 1                                                     | 1552.2 | 83.3 | 28 R.VFNVFLYGNVEK.V                       |
| HsFLAG-ARP6_Ti_1     | 4.3527 | 0.5048 | 1868.15 | 1869.118 | 6281.1  | 1                                                     | 1323.9 | 67.6 | 3 K.SKPGAAMVEMADGYAVDR.A                  |
| HsFlag-NUFIP_Ti_11   | 4.7574 | 0.4725 | 1635.58 | 1635.881 | 7045.2  | 1                                                     | 1436.6 | 73.1 | 11 R.AITHLNNFMFGQK.L                      |
| HsFLAG-FLJ20729_     | 4.4276 | 0.4642 | 2188.34 | 2189.367 | 4886.7  | 1                                                     | 672.9  | 55.3 | 5 K.QPAIMPQSYGLEDGSCSYK.D                 |
| HsFLAG-p53-DNA-D     | 6.9269 | 0.4661 | 3774.22 | 3775.175 | 11528.8 | 1                                                     | 2872.2 | 33.9 | 10 R.IQHPSNVLHFFNAPLEVTEENFFEICDELGVK.R   |
| HsFLAG-p53-DNA-D     | 2.5485 | 0.1331 | 1222.48 | 1223.325 | 8580.1  | 4                                                     | 542    | 55   | 2 R.SSSGILLEWESK.S                        |
| HsFLAG-ARP6_Ti_1     | 3.2195 | 0.2979 | 1223.28 | 1223.325 | 6505.7  | 1                                                     | 997.9  | 80   | 2 R.SSSGILLEWESK.S                        |
| HsFlag-VPS71_Ti_1    | 5.2543 | 0.4626 | 1868.14 | 1868.114 | 5837.1  | 1                                                     | 824.8  | 63.3 | 12 K.SDALETGLFNLHYQMK.N                   |
| HsFLAG-p53-DNA-D     | 3.6562 | 0.3116 | 1868.25 | 1868.114 | 4030.8  | 3                                                     | 585.5  | 41.7 | 1 K.SDALETGLFNLHYQMK.N                    |
| HsFLAG-Lin9_Ti_20'   | 2.9035 | 0.1903 | 1264.11 | 1264.423 | 6557.7  | 5                                                     | 439.1  | 60   | 2 K.NPNGPYPYTLK.L                         |
| HsFLAG-p53-DNA-D     | 2.4439 | 0.3385 | 1121.44 | 1122.189 | 4573.2  | 4                                                     | 315.6  | 61.1 | 2 K.LCFSTAQHAS.-                          |
| gij7656936 re        | 32     | 368    | 65.80%  | 403      | 42884   | 6 zinc finger, HIT domain containing 2 [Homo sapiens] |        |      |                                           |
| * HsFlag-ZnF-HIT2_Ti | 3.0239 | 0.3296 | 1141.11 | 1141.201 | 4100.9  | 1                                                     | 633.2  | 87.5 | 1 R.CNAPYCSLR.C                           |
| * HsFlag-ZnF-HIT2_Ti | 3.679  | 0.2365 | 2747.76 | 2746.931 | 6883.3  | 1                                                     | 584.9  | 31   | 1 R.CYRTHGTCAENFYRDQVLGELR.G              |
| * HsFlag-ZnF-HIT2_Ti | 3.9363 | 0.4412 | 1355.52 | 1356.403 | 4153.9  | 1                                                     | 825.4  | 85   | 6 R.THGTCAENFYR.D                         |
| * HsFlag-ZnF-HIT2_Ti | 2.6744 | 0.2493 | 1355.72 | 1356.403 | 4606.6  | 1                                                     | 304.8  | 65   | 4 R.THGTCAENFYR.D                         |
| * HsFlag-ZnF-HIT2_Ti | 3.8261 | 0.1563 | 2266.78 | 2267.429 | 6169.5  | 7                                                     | 363.4  | 41.7 | 8 R.THGTCAENFYRDQVLGELR.G                 |
| * HsFlag-ZnF-HIT2_Ti | 3.0511 | 0.2163 | 1443.53 | 1443.612 | 7438.9  | 1                                                     | 611.4  | 61.5 | 1 R.GCSAPPSRLASALR.R                      |
| * HsFlag-ZnF-HIT2_Ti | 4.8171 | 0.2361 | 3280.93 | 3281.523 | 8007.8  | 1                                                     | 1067.5 | 29.2 | 6 R.LRQQRETEDEPGEAGLSSGPAPGGLSGLWER.L     |
| * HsFlag-ZnF-HIT2_Ti | 7.2242 | 0.4703 | 3011.8  | 3012.176 | 7651.5  | 1                                                     | 2439.5 | 41.1 | 5 R.QQRETEDEPGEAGLSSGPAPGGLSGLWER.L       |
| * HsFlag-ZnF-HIT2_Ti | 3.5291 | 0.2389 | 3012.22 | 3012.176 | 6161.6  | 1                                                     | 492.9  | 37.5 | 4 R.QQRETEDEPGEAGLSSGPAPGGLSGLWER.L       |
| * HsFlag-ZnF-HIT2_Ti | 5.6709 | 0.3404 | 3608.79 | 3607.872 | 11353.8 | 1                                                     | 1008.2 | 25   | 5 R.QQRETEDEPGEAGLSSGPAPGGLSGLWERLAPGEK.A |
| * HsFlag-ZnF-HIT2_Ti | 5.4607 | 0.3739 | 3195.8  | 3195.423 | 5646.2  | 1                                                     | 974.3  | 30.6 | 2 R.ETEDEPGEAGLSSGPAPGGLSGLWERLAPGEK.A    |
| * HsFlag-ZnF-HIT2_Ti | 2.8441 | 0.182  | 1708.43 | 1708.024 | 6838.8  | 1                                                     | 477.5  | 59.1 | 2 R.LLPPWRPWWWNR.G                        |
| * HsFlag-ZnF-HIT2_Ti | 6.1915 | 0.4233 | 2706.26 | 2705.938 | 5018.6  | 1                                                     | 991.2  | 50   | 35 R.GAGPQLLEELDNAPGSDAAELELAPAR.T        |
| * HsFlag-ZnF-HIT2_Ti | 6.6636 | 0.4491 | 3428.87 | 3430.75  | 6173.7  | 1                                                     | 842.1  | 28   | 20 R.GAGPQLLEELDNAPGSDAAELELAPARTPPDSVK.D |
| * HsFlag-ZnF-HIT2_Ti | 1.8676 | 0.1455 | 743.44  | 743.835  | 4027.3  | 2                                                     | 287.7  | 75   | 1 R.TPPDSVK.D                             |
| * HsFlag-ZnF-HIT2_Ti | 3.9806 | 0.3366 | 1639.57 | 1638.871 | 3776.5  | 1                                                     | 576.9  | 63.3 | 1 R.VLGDVPGACTPVVPT.R.I                   |
| * HsFlag-ZnF-HIT2_Ti | 2.4963 | 0.1605 | 955.64  | 956.173  | 3516.8  | 2                                                     | 283.8  | 68.8 | 2 R.IPAIVSLSR.G                           |
| * HsFlag-ZnF-HIT2_Ti | 2.6368 | 0.0943 | 956.38  | 956.173  | 4624.8  | 1                                                     | 982.7  | 93.8 | 2 R.IPAIVSLSR.G                           |
| * HsFlag-ZnF-HIT2_Ti | 2.5022 | 0.1256 | 826.43  | 824.999  | 4155.1  | 9                                                     | 688.6  | 85.7 | 1 R.GPVSPVLR.F                            |
| * HsFlag-ZnF-HIT2_Ti | 1.8985 | 0.1205 | 870.56  | 871.002  | 4361.4  | 1                                                     | 455.9  | 71.4 | 1 R.GAMHEVAR.I                            |
| * HsFlag-ZnF-HIT2_Ti | 2.6821 | 0.1808 | 871.03  | 871.002  | 5362.3  | 3                                                     | 728.9  | 85.7 | 1 R.GAMHEVAR.I                            |
| * HsFlag-ZnF-HIT2_Ti | 2.2598 | 0.2297 | 1169.51 | 1170.351 | 5720.1  | 1                                                     | 412.3  | 60   | 1 R.ILLGEGPTNQK.G                         |
| * HsFlag-ZnF-HIT2_Ti | 3.1876 | 0.1937 | 1170.41 | 1170.351 | 5750.7  | 7                                                     | 781.3  | 75   | 2 R.ILLGEGPTNQK.G                         |
| * HsFlag-ZnF-HIT2_Ti | 4.1615 | 0.3954 | 2772    | 2772.174 | 7975.8  | 1                                                     | 850    | 38.5 | 1 R.ILLGEGPTNQKGYTLAALGDLAQTLGR.A         |
| * HsFlag-ZnF-HIT2_Ti | 5.3886 | 0.402  | 1620.67 | 1620.846 | 9148.4  | 1                                                     | 2211   | 73.3 | 26 K.GYTLAALGDLAQTLGR.A                   |

|               |                    |        |        |         |          |         |   |                                                             |      |    |                                  |  |
|---------------|--------------------|--------|--------|---------|----------|---------|---|-------------------------------------------------------------|------|----|----------------------------------|--|
| *             | HsFlag-ZnF-HIT2_Ti | 2.5518 | 0.1678 | 1643.52 | 1643.803 | 5951.4  | 6 | 374.6                                                       | 54.2 | 1  | K.QAVAREERDHLR.A                 |  |
| *             | HsFlag-ZnF-HIT2_Ti | 5.4527 | 0.4168 | 2777.85 | 2779.054 | 7284    | 1 | 1921.4                                                      | 58.7 | 62 | K.CQFLAWTNEAALTPALDCAR.A         |  |
| *             | HsFlag-ZnF-HIT2_Ti | 4.7417 | 0.2973 | 2779.36 | 2779.054 | 7472.8  | 1 | 1299.4                                                      | 34.8 | 4  | K.CQFLAWTNEAALTPALDCAR.A         |  |
| *             | HsFlag-ZnF-HIT2_Ti | 4.7329 | 0.3126 | 2201.4  | 2202.432 | 4853.6  | 1 | 1506.8                                                      | 46.2 | 35 | R.AHQAHAVVAEEVAALTGELER.L        |  |
| *             | HsFlag-ZnF-HIT2_Ti | 7.5752 | 0.4801 | 2202.28 | 2202.432 | 9009.2  | 1 | 5097.7                                                      | 85   | 96 | R.AHQAHAVVAEEVAALTGELER.L        |  |
| *             | HsFlag-ZnF-HIT2_Ti | 2.6022 | 0.2503 | 1146.81 | 1147.365 | 7164.9  | 1 | 483.6                                                       | 60   | 7  | R.LWGGPVPPAPR.T                  |  |
| *             | HsFlag-ZnF-HIT2_Ti | 3.802  | 0.2164 | 1147.7  | 1147.365 | 4707    | 1 | 1414.8                                                      | 95   | 24 | R.LWGGPVPPAPR.T                  |  |
| gil7669492 re |                    | 26     | 152    | 65.70%  | 335      | 36053   |   | 8.5 glyceraldehyde-3-phosphate dehydrogenase [Homo sapiens] |      |    |                                  |  |
| *             | HsFlag-VPS71_Ti_10 | 4.8083 | 0.2957 | 3311.79 | 3310.763 | 4266.1  | 1 | 601.5                                                       | 30.6 | 4  | K.VDIVAINDPFDLNYMVFYDSTHGK.F     |  |
| *             | HsFLAG-p53-DNA-D   | 4.5533 | 0.4635 | 1614.62 | 1614.885 | 6017.3  | 1 | 1396.5                                                      | 84.6 | 4  | K.LVINGNPITIFQER.D               |  |
| *             | HsFLAG-p53-DNA-D   | 4.2321 | 0.4568 | 2041.67 | 2042.343 | 7594.5  | 1 | 781.9                                                       | 50   | 18 | K.LVINGNPITIFQERDPSK.I           |  |
| *             | HsFLAG-ARP6_Ti_10  | 3.5495 | 0.2152 | 2042.39 | 2042.343 | 3991.1  | 1 | 554.4                                                       | 33.8 | 1  | K.LVINGNPITIFQERDPSK.I           |  |
| *             | HsFlag-VPS71_Ti_10 | 4.2703 | 0.3533 | 2278.54 | 2278.495 | 8622.7  | 1 | 762.6                                                       | 31.2 | 2  | K.WGDAGAEYVVESTGVFTTMEK.A        |  |
| *             | HsFlag-VPS71_Ti_10 | 5.4889 | 0.4446 | 2278.87 | 2278.495 | 5896.5  | 1 | 986.8                                                       | 52.5 | 15 | K.WGDAGAEYVVESTGVFTTMEK.A        |  |
| *             | HsFLAG-p53-DNA-D   | 2.8939 | 0.2135 | 909.47  | 910.021  | 3953.3  | 1 | 559                                                         | 72.2 | 5  | K.AGAHLQGGAK.R                   |  |
| *             | HsFLAG-ARP6_Ti_10  | 5.2043 | 0.2791 | 2369.71 | 2370.79  | 6120.7  | 1 | 1195.9                                                      | 41.7 | 6  | K.RVIISAPSADAPMFVMGVNHEK.Y       |  |
| *             | HsFlag-VPS71_Ti_10 | 5.0204 | 0.3935 | 2369.99 | 2370.79  | 5856.5  | 1 | 984.6                                                       | 57.1 | 3  | K.RVIISAPSADAPMFVMGVNHEK.Y       |  |
| *             | HsFLAG-p53-DNA-D   | 5.698  | 0.4177 | 3090.89 | 3091.57  | 10058.4 | 1 | 1368                                                        | 30.6 | 2  | K.RVIISAPSADAPMFVMGVNHEKYDNSLK.I |  |
| *             | HsFlag-VPS71_Ti_10 | 3.7709 | 0.3387 | 2215.37 | 2214.603 | 5099.4  | 1 | 609.9                                                       | 52.5 | 4  | R.VIISAPSADAPMFVMGVNHEK.Y        |  |
| *             | HsFLAG-TCF3_Ti_10  | 4.4938 | 0.3128 | 1835.5  | 1835.04  | 8673.7  | 1 | 2387.6                                                      | 71.9 | 10 | K.IISNASCTTNCLAPLAK.V            |  |
| *             | HsFlag-VPS71_Ti_10 | 6.977  | 0.5041 | 2597.06 | 2597.004 | 5962.1  | 1 | 1328.1                                                      | 41.3 | 8  | K.VIHDNFGIVEGLMTTVHAITATQK.T     |  |
| *             | HsFlag-VPS71_Ti_10 | 5.7979 | 0.4764 | 2597.94 | 2597.004 | 8350.3  | 1 | 1794.4                                                      | 56.5 | 6  | K.VIHDNFGIVEGLMTTVHAITATQK.T     |  |
| *             | HsFLAG-p53-DNA-D   | 3.3    | 0.1945 | 1411.61 | 1412.629 | 5478    | 1 | 534.8                                                       | 57.1 | 2  | R.GALQNIIPASTGAAK.A              |  |
| *             | HsFLAG-ARP6_Ti_10  | 3.4656 | 0.1531 | 1411.97 | 1412.629 | 4458.2  | 1 | 820.5                                                       | 75   | 7  | R.GALQNIIPASTGAAK.A              |  |
| *             | HsFlag-VPS71_Ti_10 | 4.3698 | 0.2851 | 2307.32 | 2308.667 | 4232.3  | 2 | 388.3                                                       | 45   | 1  | K.LTGMAFRVPTANVSVVDLTCR.L        |  |
| *             | HsFlag-VPS71_Ti_10 | 5.681  | 0.3511 | 2679.46 | 2679.116 | 8374    | 1 | 1413.5                                                      | 37   | 2  | K.LTGMAFRVPTANVSVVDLTCRLEK.P     |  |
| *             | HsFlag-VPS71_Ti_10 | 2.8845 | 0.2813 | 1530.69 | 1531.715 | 4474.4  | 7 | 216.9                                                       | 50   | 2  | R.VPTANVSVVDLTCR.L               |  |
| *             | HsFlag-VPS71_Ti_10 | 4.2187 | 0.3472 | 1531.82 | 1531.715 | 6179.1  | 1 | 1276                                                        | 76.9 | 10 | R.VPTANVSVVDLTCR.L               |  |
| *             | HsFlag-VPS71_Ti_10 | 4.5399 | 0.3334 | 1904.79 | 1902.164 | 7410.5  | 1 | 1225.1                                                      | 62.5 | 6  | R.VPTANVSVVDLTCRLEK.P            |  |
| *             | HsFLAG-p53-DNA-D   | 2.8826 | 0.0892 | 1320.42 | 1320.528 | 4949.5  | 6 | 786.6                                                       | 75   | 1  | R.LEKPAKYDDIK.K                  |  |
| *             | HsFLAG-p53-DNA-D   | 3.4536 | 0.2241 | 1448.17 | 1448.703 | 5841.8  | 1 | 1045.8                                                      | 81.8 | 1  | R.LEKPAKYDDIK.V                  |  |
| *             | HsFLAG-p53-DNA-D   | 4.6813 | 0.4329 | 1765.63 | 1764.891 | 9002.4  | 1 | 1256.2                                                      | 65.4 | 20 | K.LISWYDNEFGYSNR.V               |  |
| *             | HsFlag-VPS71_Ti_10 | 2.9913 | 0.351  | 1330.51 | 1331.588 | 5778.1  | 1 | 846.8                                                       | 68.2 | 3  | R.VVDLMAHMASKE.-                 |  |
| *             | HsFLAG-p53-DNA-D   | 4.3568 | 0.4109 | 1331.6  | 1331.588 | 9818.1  | 1 | 2228.2                                                      | 86.4 | 9  | R.VVDLMAHMASKE.-                 |  |
| gil6912448 re |                    | 37     | 399    | 65.60%  | 288      | 32308   |   | 9.7 MORF-related gene X [Homo sapiens]                      |      |    |                                  |  |
| *             | HsTIP60_Ti_106.065 | 3.5654 | 0.2743 | 2048.72 | 2049.164 | 8476.3  | 1 | 529.8                                                       | 47.1 | 1  | R.KQGSQPRGQQSAEEENFK.K           |  |
| *             | HsTIP60_Ti_101.119 | 2.429  | 0.1688 | 1266.4  | 1267.294 | 8250.9  | 1 | 526.9                                                       | 55   | 1  | R.GQQAEEENFK.K                   |  |
| *             | HsTIP60_Ti_102.086 | 3.4734 | 0.3282 | 1267.14 | 1267.294 | 7827    | 1 | 1221.3                                                      | 80   | 4  | R.GQQAEEENFK.K                   |  |
| *             | HsTIP60_Ti_106.197 | 2.838  | 0.2517 | 1685.13 | 1685.84  | 3787.1  | 1 | 508.8                                                       | 63.3 | 1  | R.WGGRSAENPPSGSVRK.T             |  |
| *             | HsTIP60_Ti_103.113 | 4.4286 | 0.4647 | 1725.45 | 1725.769 | 8744.7  | 1 | 1479                                                        | 61.8 | 21 | K.TPGNGDGGSTSEAPQPPR.K           |  |
| *             | HsTIP60_Ti_104.118 | 4.4354 | 0.3609 | 1853.38 | 1853.943 | 7195.7  | 1 | 1249.2                                                      | 41.7 | 4  | K.TPGNGDGGSTSEAPQPPR.K           |  |
| *             | HsMRGBP-FLAG_Ti    | 4.4395 | 0.442  | 1855    | 1853.943 | 8237    | 1 | 999.4                                                       | 55.6 | 21 | K.TPGNGDGGSTSEAPQPPR.K           |  |
| *             | HsTIP60_Ti_106.101 | 3.7623 | 0.4113 | 1981.74 | 1982.117 | 7523.7  | 1 | 497.4                                                       | 42.1 | 7  | K.TPGNGDGGSTSEAPQPPR.K           |  |

|               |                    |        |        |         |          |         |                                                               |        |      |                                |
|---------------|--------------------|--------|--------|---------|----------|---------|---------------------------------------------------------------|--------|------|--------------------------------|
| *             | HsTIP60_Ti_106.138 | 3.9261 | 0.3545 | 1981.96 | 1982.117 | 6502.4  | 1                                                             | 938.7  | 38.2 | 5 K.TPGNGDGGSTSEAPQPPRKK.R     |
| *             | HsMRGBP-FLAG_Ti    | 2.7635 | 0.2315 | 1549.71 | 1550.665 | 3765.1  | 1                                                             | 326.6  | 53.8 | 3 R.ARADPTVESEEFK.N            |
| *             | HsTIP60_Ti_103.164 | 4.6019 | 0.3656 | 1550.28 | 1550.665 | 4190.7  | 1                                                             | 1470.7 | 88.5 | 13 R.ARADPTVESEEFK.N           |
| *             | HsMRGBP-FLAG_Ti    | 2.5259 | 0.2816 | 1322.56 | 1323.399 | 2700.9  | 3                                                             | 242.9  | 54.5 | 1 R.ADPTVESEEFK.N              |
| *             | HsTIP60_Ti_102.158 | 3.1361 | 0.2389 | 1326.22 | 1323.399 | 4691.2  | 1                                                             | 666.6  | 72.7 | 5 R.ADPTVESEEFK.N              |
| *             | HsTIP60_Ti_103.149 | 3.0342 | 0.3207 | 1593.47 | 1593.69  | 3654.1  | 1                                                             | 384.4  | 65.4 | 2 R.ADPTVESEEFK.NR.M           |
| *             | HsMRGBP-FLAG_Ti    | 3.1612 | 0.199  | 2467.33 | 2466.883 | 3672.4  | 1                                                             | 558.7  | 52.6 | 1 K.VKIPEELKPWLVEDWDLVTR.Q     |
| *             | HsMRGBP-FLAG_Ti    | 6.2555 | 0.2843 | 2240.57 | 2239.576 | 8943.8  | 1                                                             | 2424.7 | 48.5 | 9 K.IPEELKPWLVEDWDLVTR.Q       |
| *             | HsMRGBP-FLAG_Ti    | 5.0807 | 0.2766 | 2240.96 | 2239.576 | 3322.7  | 1                                                             | 758.2  | 67.6 | 6 K.IPEELKPWLVEDWDLVTR.Q       |
| *             | HsMRGBP-FLAG_Ti    | 4.1463 | 0.3255 | 2495.29 | 2495.881 | 4961.6  | 1                                                             | 790.6  | 55.3 | 2 K.IPEELKPWLVEDWDLVTRQK.Q     |
| *             | HsMRGBP-FLAG_Ti    | 5.494  | 0.2835 | 2496.37 | 2495.881 | 7512.3  | 1                                                             | 1312.1 | 40.8 | 5 K.IPEELKPWLVEDWDLVTRQK.Q     |
| *             | HsMRGBP-FLAG_Ti    | 2.6901 | 0.305  | 1528.64 | 1529.736 | 4783.1  | 1                                                             | 488.5  | 63.6 | 5 K.PWLVEDWDLVTR.Q             |
| *             | HsMRGBP-FLAG_Ti    | 4.543  | 0.3925 | 1530.37 | 1529.736 | 5969.5  | 1                                                             | 1742   | 90.9 | 10 K.PWLVEDWDLVTR.Q            |
| *             | HsMRGBP-FLAG_Ti    | 3.1298 | 0.3509 | 1667.87 | 1667.822 | 9150.6  | 3                                                             | 974.4  | 61.5 | 1 K.KNVDAILEEYANCK.K           |
| *             | HsMRGBP-FLAG_Ti    | 3.6276 | 0.3215 | 1796.14 | 1795.997 | 8211    | 1                                                             | 1208   | 64.3 | 1 K.KNVDAILEEYANCKK.S          |
| *             | HsTIP60_Ti_105.238 | 3.5378 | 0.4499 | 1538.49 | 1539.648 | 4882.5  | 1                                                             | 677.7  | 70.8 | 20 K.NVDAILEEYANCK.K           |
| *             | HsTIP60_Ti_105.023 | 5.1521 | 0.4343 | 1539.14 | 1539.648 | 7850.4  | 1                                                             | 1948.5 | 83.3 | 62 K.NVDAILEEYANCK.K           |
| *             | HsMRGBP-FLAG_Ti    | 4.6234 | 0.2302 | 1667.61 | 1667.822 | 6888.6  | 1                                                             | 1373.7 | 76.9 | 9 K.NVDAILEEYANCKK.S           |
| *             | HsTIP60_Ti_106.234 | 5.4488 | 0.3045 | 2134.17 | 2135.338 | 8410.7  | 1                                                             | 1759   | 42.1 | 1 K.SQGNVDNKEYAVNEVVAGIK.E     |
| *             | HsTIP60_Ti_106.233 | 4.9209 | 0.4012 | 2134.5  | 2135.338 | 9675    | 1                                                             | 1966.9 | 60.5 | 2 K.SQGNVDNKEYAVNEVVAGIK.E     |
|               | HsMRGBP-FLAG_Ti    | 3.4706 | 0.229  | 1291.59 | 1292.475 | 4128.7  | 2                                                             | 414.9  | 68.2 | 11 K.EYAVNEVVAGIK.E            |
|               | HsTIP60_Ti_103.259 | 3.9686 | 0.3073 | 1292.31 | 1292.475 | 5695.1  | 1                                                             | 1069.2 | 81.8 | 59 K.EYAVNEVVAGIK.E            |
|               | HsMRGBP-FLAG_Ti    | 4.7656 | 0.1574 | 1719.77 | 1720.036 | 6223.4  | 1                                                             | 1626.6 | 84.6 | 21 K.EYFNVMLGTQLLYK.F          |
|               | HsMRGBP-FLAG_Ti    | 3.0795 | 0.2746 | 1421.62 | 1422.679 | 7413.3  | 1                                                             | 670.5  | 58.3 | 9 R.IGAMLAYTPLDEK.S            |
|               | HsTIP60_Ti_105.222 | 4.9481 | 0.3579 | 1422.29 | 1422.679 | 6181.6  | 1                                                             | 1429.5 | 83.3 | 30 R.IGAMLAYTPLDEK.S           |
| *             | HsMRGBP-FLAG_Ti    | 3.8896 | 0.3722 | 1603.74 | 1603.945 | 4329.4  | 1                                                             | 1020.6 | 80.8 | 2 K.SLALLLGYLHDFLK.Y           |
| *             | HsMRGBP-FLAG_Ti    | 3.1291 | 0.3342 | 1303.53 | 1304.399 | 4202.4  | 1                                                             | 301.7  | 59.1 | 22 K.NSASLFTASDYK.V            |
| *             | HsTIP60_Ti_102.196 | 4.3094 | 0.3314 | 1304.18 | 1304.399 | 6923.2  | 1                                                             | 1650.3 | 86.4 | 19 K.NSASLFTASDYK.V            |
| *             | HsTIP60_Ti_106.067 | 2.6368 | 0.2511 | 1060.64 | 1061.186 | 7502.9  | 1                                                             | 873.5  | 81.2 | 3 K.VASAEYHRK.A                |
| gi 5032051 re | 8                  | 46     | 65.60% | 151     | 16273    | 10.1    | ribosomal protein S14 [Homo sapiens]                          |        |      |                                |
| gi 68160922 r | 8                  | 46     | 65.60% | 151     | 16273    | 10.1    | ribosomal protein S14 [Homo sapiens]                          |        |      |                                |
| gi 68160915 r | 8                  | 46     | 65.60% | 151     | 16273    | 10.1    | ribosomal protein S14 [Homo sapiens]                          |        |      |                                |
|               | HsFlag-NUFIP_Ti_11 | 5.0601 | 0.4308 | 4506.19 | 4507.967 | 7720.4  | 1                                                             | 1030.7 | 23.8 | 3 K.E                          |
|               | HsFlag-NUFIP_Ti_1C | 4.1233 | 0.1648 | 2265.68 | 2266.447 | 7950.7  | 1                                                             | 2004   | 43.8 | 3 K.ADRDESSPYAAMLAQDVAQR.C     |
|               | HsFlag-NUFIP_Ti_1C | 4.9474 | 0.359  | 2266.13 | 2266.447 | 6108.5  | 1                                                             | 1703.3 | 70   | 6 K.ADRDESSPYAAMLAQDVAQR.C     |
|               | HsFLAG-ARP6_Ti_1   | 2.9255 | 0.1516 | 1096.69 | 1095.327 | 4952.2  | 1                                                             | 651    | 77.8 | 8 K.ELGITALHIK.L               |
|               | HsFLAG-TIP49b_Ti_  | 1.91   | 0.1633 | 1054.64 | 1055.179 | 3230.1  | 1                                                             | 207.2  | 65   | 1 K.TPGPGAQSALR.A              |
|               | HsFLAG-ARP6_Ti_1   | 3.6757 | 0.37   | 1055.38 | 1055.179 | 7957.1  | 1                                                             | 1146.6 | 80   | 15 K.TPGPGAQSALR.A             |
|               | HsFLAG-ARP6_Ti_1   | 4.1363 | 0.4185 | 1756.45 | 1756.954 | 5107.2  | 1                                                             | 1179.6 | 73.3 | 6 K.IGRIEDVTPIPSDSTR.R         |
|               | HsFlag-NUFIP_Ti_1C | 4.2111 | 0.2605 | 1430.48 | 1430.555 | 4864.7  | 2                                                             | 717.5  | 70.8 | 4 R.IEDVTPIPSDSTR.R            |
| gi 50593002 r | 11                 | 121    | 65.10% | 255     | 28416    | 8.6     | small nuclear ribonucleoprotein polypeptide A' [Homo sapiens] |        |      |                                |
| *             | HsFlag-NUFIP_Ti_1C | 5.6285 | 0.5078 | 1891.65 | 1892.119 | 8528.5  | 1                                                             | 2017.4 | 68.8 | 23 K.LTAEELIEQAAQYTNVAVR.D     |
| *             | HsFlag-NUFIP_Ti_1C | 6.101  | 0.4502 | 2808.17 | 2807.086 | 11083.7 | 1                                                             | 1666.7 | 47.9 | 31 K.IPVLENLGTLDQFADIFSDNEIR.K |

|                |                    |        |        |         |          |                                                  |   |        |      |                                           |
|----------------|--------------------|--------|--------|---------|----------|--------------------------------------------------|---|--------|------|-------------------------------------------|
| *              | HsFlag-NUFIP_Ti_1C | 3.4163 | 0.2226 | 1059.58 | 1059.297 | 4656                                             | 2 | 868.9  | 87.5 | 9 R.KLDGFPLLR.R                           |
| *              | HsFlag-NUFIP_Ti_11 | 7.1876 | 0.3997 | 3735.47 | 3737.246 | 10977                                            | 1 | 2588.3 | 30.9 | 31 R.IGEGLDQALPCLTELILTNNLSVELGDLPLASLK.S |
|                | HsFLAG-ARP6_Ti_1   | 3.3081 | 0.3152 | 1065.89 | 1066.286 | 4598.7                                           | 1 | 986.4  | 93.8 | 3 K.SLTYLSILR.N                           |
|                | HsFLAG-ARP6_Ti_1   | 2.2435 | 0.1879 | 1217.52 | 1218.352 | 5587.4                                           | 1 | 735.9  | 63.6 | 3 K.TFNPAGLPTDK.K                         |
|                | HsFLAG-ARP6_Ti_1   | 3.0774 | 0.1574 | 1218.25 | 1218.352 | 4254.1                                           | 1 | 1395   | 86.4 | 4 K.TFNPAGLPTDK.K                         |
|                | HsFlag-NUFIP_Ti_1C | 3.9536 | 0.2775 | 1255.59 | 1255.414 | 7459.6                                           | 2 | 1257.9 | 75   | 4 K.KGGPSPGDVEAIK.N                       |
|                | HsFlag-NUFIP_Ti_1C | 4.8532 | 0.4808 | 1459.62 | 1459.599 | 8564.8                                           | 1 | 1906.6 | 80.8 | 8 K.NAIANASTLAEVER.L                      |
|                | HsFLAG-ARP6_Ti_1   | 4.1075 | 0.3496 | 1126.52 | 1126.301 | 5124.1                                           | 1 | 1204.5 | 90   | 4 K.GLLQSGQIPGR.E                         |
| *              | HsFlag-NUFIP_Ti_1C | 2.7281 | 0.2561 | 2257.2  | 2256.227 | 9502.8                                           | 6 | 418.6  | 35   | 1 R.RSGPTDDGEEEMEEDTVTNGS.-               |
| gij 57863257 r | 34                 | 159    | 64.70% | 556     | 60344    | 6.1 T-complex protein 1 isoform a [Homo sapiens] |   |        |      |                                           |
| *              | HsFLAG-ARP6_Ti_1   | 5.9928 | 0.4353 | 1517.44 | 1517.784 | 8788.7                                           | 1 | 2762.7 | 85.7 | 5 R.SQNVMMAASIANIVK.S                     |
| *              | HsFLAG-ARP6_Ti_1   | 5.9654 | 0.4738 | 2105.32 | 2105.408 | 6147.3                                           | 1 | 1619.3 | 68.4 | 17 K.MLVDDIGDVTITNDGATILK.L               |
| *              | HsFLAG-ARP6_Ti_1   | 3.1348 | 0.2694 | 1107.01 | 1107.295 | 5367.6                                           | 3 | 1012.8 | 83.3 | 3 K.LLEVEHPAAK.V                          |
| *              | HsFLAG-ARP6_Ti_1   | 3.4989 | 0.337  | 1303.51 | 1304.449 | 8508.1                                           | 1 | 1367.1 | 75   | 2 K.VLCELADLQDK.E                         |
| *              | HsFLAG-ARP6_Ti_1   | 4.3224 | 0.2782 | 1305.55 | 1304.449 | 6702.9                                           | 1 | 1993.8 | 90   | 3 K.VLCELADLQDK.E                         |
| *              | HsFLAG-ARP5_Ti_1   | 4.4763 | 0.2378 | 3101.44 | 3101.528 | 9737.7                                           | 1 | 1487.3 | 33   | 4 K.VLCELADLQDKEVGDGTTSVVIAAELLK.N        |
| *              | HsFLAG-ARP6_Ti_1   | 4.0401 | 0.267  | 1816.64 | 1816.102 | 8006.9                                           | 1 | 1520.2 | 45.6 | 1 K.EVGDGTTSVVIAAELLK.N                   |
| *              | HsFLAG-ARP6_Ti_1   | 5.058  | 0.3974 | 1816.68 | 1816.102 | 7191.2                                           | 1 | 1262.7 | 64.7 | 22 K.EVGDGTTSVVIAAELLK.N                  |
| *              | HsFLAG-ARP6_Ti_1   | 2.345  | 0.1975 | 1229.39 | 1230.409 | 5030.4                                           | 1 | 379.8  | 70   | 2 K.IHPTSVISGYR.L                         |
| *              | HsFLAG-ARP6_Ti_1   | 5.3485 | 0.3516 | 1763.5  | 1763.945 | 6735.4                                           | 1 | 1689.3 | 82.1 | 2 R.YINENLIVNTDELGR.D                     |
| *              | HsFLAG-ARP6_Ti_1   | 3.9221 | 0.2116 | 2648.93 | 2649.927 | 8335.6                                           | 1 | 548.2  | 36.4 | 1 R.YINENLIVNTDELGRDCLINAAK.T             |
|                | HsFLAG-ARP6_Ti_1   | 3.6117 | 0.3492 | 2220.56 | 2221.663 | 8230.4                                           | 1 | 950.8  | 47.5 | 1 K.IIGINGDFFANMVVDAVLAIK.Y               |
|                | HsFLAG-ARP6_Ti_1   | 2.5651 | 0.191  | 1146.56 | 1147.36  | 5513.3                                           | 6 | 406.9  | 61.1 | 1 R.YPVNSVNILK.A                          |
|                | HsFLAG-ARP6_Ti_1   | 3.0741 | 0.1526 | 1147.54 | 1147.36  | 5055.3                                           | 3 | 1147.6 | 88.9 | 2 R.YPVNSVNILK.A                          |
|                | HsFLAG-ARP6_Ti_1   | 5.0505 | 0.4554 | 2589.02 | 2588.978 | 6292.6                                           | 1 | 1156.3 | 50   | 2 R.SQMESMLISGYALNCVVGSQGMFK.R            |
|                | HsFLAG-ARP6_Ti_1   | 3.1886 | 0.2571 | 1195.48 | 1195.367 | 6215.5                                           | 2 | 1179.7 | 83.3 | 2 K.IACLDLFLQK.T                          |
|                | HsFLAG-ARP6_Ti_1   | 5.0254 | 0.3731 | 1925.18 | 1924.248 | 5118.2                                           | 1 | 930.5  | 65.6 | 10 K.LGVQVVITDPEKLDQIR.Q                  |
|                | HsFLAG-ARP6_Ti_1   | 4.4544 | 0.2171 | 1925.36 | 1924.248 | 6646.5                                           | 2 | 1212.2 | 43.8 | 2 K.LGVQVVITDPEKLDQIR.Q                   |
|                | HsFLAG-ARP6_Ti_1   | 6.1939 | 0.51   | 2178.73 | 2177.527 | 7333                                             | 1 | 1000.4 | 52.5 | 12 K.ILATGANVILTTGGIDDMCLK.Y              |
|                | HsFLAG-ARP6_Ti_1   | 3.8537 | 0.3359 | 3566.05 | 3566.916 | 9807                                             | 4 | 546.2  | 21.2 | 1 K.ASGATILSTLANLEGEETFEAMLGQAEVQER.I     |
|                | HsFLAG-ARP6_Ti_1   | 3.6488 | 0.1485 | 1232.98 | 1232.426 | 4299.4                                           | 7 | 844.5  | 88.9 | 2 R.ICDDELILIK.N                          |
|                | HsFLAG-ARP6_Ti_1   | 2.9702 | 0.2955 | 1141.51 | 1142.307 | 5062.9                                           | 1 | 712.2  | 72.2 | 4 R.SLHDALCVVK.R                          |
|                | HsFLAG-ARP6_Ti_1   | 2.8588 | 0.2575 | 1142.64 | 1142.307 | 3951.7                                           | 1 | 644.4  | 83.3 | 2 R.SLHDALCVVK.R                          |
|                | HsFLAG-ARP6_Ti_1   | 3.3022 | 0.2432 | 1148.47 | 1148.304 | 5294.7                                           | 1 | 988.1  | 94.4 | 4 R.EQLAIAEFAR.S                          |
|                | HsFLAG-ARP6_Ti_1   | 5.2436 | 0.3569 | 2353.08 | 2354.706 | 5685.8                                           | 1 | 1123.6 | 56.8 | 20 R.SLLVIPNTLAVNAAQDSTDLVAK.L            |
|                | HsFLAG-ARP6_Ti_1   | 5.1419 | 0.4138 | 2354.48 | 2354.706 | 7405.8                                           | 1 | 1770.1 | 40.9 | 2 R.SLLVIPNTLAVNAAQDSTDLVAK.L             |
|                | HsFLAG-ARP6_Ti_1   | 3.889  | 0.2515 | 1412.46 | 1412.505 | 6741.9                                           | 1 | 1320.1 | 77.3 | 4 R.AFHNEAQVNP.RK                         |
|                | HsFLAG-ARP6_Ti_1   | 3.9094 | 0.2305 | 1539.71 | 1540.679 | 9772.4                                           | 2 | 1442   | 70.8 | 6 R.AFHNEAQVNP.RK.N                       |
|                | HsFLAG-ARP6_Ti_1   | 3.7491 | 0.2012 | 1541.27 | 1540.679 | 6164.8                                           | 8 | 996.7  | 52.1 | 2 R.AFHNEAQVNP.RK.N                       |
|                | HsFLAG-ARP5_Ti_1   | 3.7468 | 0.2536 | 1356.45 | 1356.567 | 7650.2                                           | 1 | 1594.1 | 86.4 | 9 K.WIGLDLSNGKPR.D                        |
|                | HsFLAG-ARP6_Ti_1   | 2.5309 | 0.0814 | 1189.5  | 1189.397 | 4242.3                                           | 1 | 635.8  | 80   | 1 K.QAGVFPEPTIVK.V                        |
|                | HsFLAG-ARP6_Ti_1   | 3.9507 | 0.4135 | 1206.32 | 1206.428 | 6763.7                                           | 1 | 1637.1 | 90   | 4 K.FATEAAITLR.I                          |
|                | HsFLAG-ARP6_Ti_1   | 2.5451 | 0.359  | 1571.15 | 1572.588 | 6631.4                                           | 1 | 595.8  | 57.1 | 1 K.HGSYEDAVHSGALND.-                     |



|               |                    |        |        |         |          |         |                                                     |        |      |     |                                    |
|---------------|--------------------|--------|--------|---------|----------|---------|-----------------------------------------------------|--------|------|-----|------------------------------------|
|               | HsFLAG-ARP6_Ti_1   | 4.4542 | 0.4599 | 1572.3  | 1572.588 | 8526.1  | 1                                                   | 1990.6 | 75   | 3   | K.HGSYEDAVHSGALND.-                |
| gi 4505813 re | 5                  | 20     | 64.00% | 89      | 10366    | 7.4     | cytoplasmic dynein light polypeptide [Homo sapiens] |        |      |     |                                    |
| *             | HsFlag-VPS71_Ti_1C | 5.338  | 0.4111 | 2514.97 | 2515.646 | 8560    | 1                                                   | 1680.9 | 57.1 | 5   | K.NADMSEEMQQDSVECATQALEK.Y         |
| *             | HsFLAG-ARP5_Ti_1   | 2.8894 | 0.0968 | 1415.48 | 1415.632 | 11640.8 | 1                                                   | 1814.8 | 77.3 | 2   | K.YNIEKDIAAHIK.K                   |
|               | HsFlag-NUFIP_Ti_11 | 3.3398 | 0.2026 | 1531.61 | 1531.723 | 5250.6  | 1                                                   | 948.4  | 81.8 | 2   | K.KYNPTWHCIVGR.N                   |
|               | HsFlag-VPS71_Ti_1C | 2.5216 | 0.2135 | 1282.54 | 1283.383 | 3899.1  | 3                                                   | 254    | 55   | 2   | R.NFGSYVTHETK.H                    |
|               | HsFLAG-p53-DNA-D   | 3.5733 | 0.2828 | 1283.22 | 1283.383 | 6733.3  | 1                                                   | 1034.2 | 80   | 9   | R.NFGSYVTHETK.H                    |
| gi 13375809 r | 61                 | 958    | 63.80% | 665     | 75703    | 7.1     | hypothetical protein LOC79657 [Homo sapiens]        |        |      |     |                                    |
| *             | HsFlag-NUFIP_Ti_1C | 3.5556 | 0.0926 | 1042.35 | 1042.264 | 5934.1  | 3                                                   | 1244.3 | 93.8 | 50  | K.AIELQLQVK.Q                      |
| *             | HsFlag-FLJ20643_Ti | 3.4499 | 0.2124 | 1381.67 | 1381.503 | 5334.1  | 1                                                   | 868.3  | 85   | 7   | K.QNAEELQDFMR.D                    |
| *             | HsFLAG-BC014022_   | 4.4025 | 0.3041 | 1619.29 | 1619.821 | 7831.8  | 1                                                   | 1438.7 | 76.9 | 25  | R.RQNGVPEENLPPIR.N                 |
| *             | HsFlag-NUFIP_Ti_1C | 4.2704 | 0.1105 | 1621.14 | 1619.821 | 5424.8  | 1                                                   | 1397.4 | 57.7 | 5   | R.RQNGVPEENLPPIR.N                 |
| *             | HsFlag-FLJ20643_Ti | 3.2884 | 0.3331 | 1464.82 | 1463.633 | 4381    | 1                                                   | 580    | 70.8 | 4   | R.QNGVPEENLPPIR.N                  |
| *             | HsFLAG-p53-DNA-D   | 2.512  | 0.1472 | 1132.45 | 1133.202 | 8687.9  | 6                                                   | 564.8  | 62.5 | 3   | K.SYDYEAWAK.L                      |
| *             | HsFlag-FLJ20643_Ti | 3.5687 | 0.3256 | 1133.78 | 1133.202 | 3720    | 2                                                   | 683.9  | 87.5 | 8   | K.SYDYEAWAK.L                      |
| *             | HsFLAG-UTX1_Ti_2   | 4.3223 | 0.3872 | 3614.93 | 3616.695 | 7958.9  | 1                                                   | 752.1  | 25   | 1   | R.ILDELKDDSTHESLSQSESEEDGIHVDSQK.A |
| *             | HsFlag-NUFIP_Ti_1C | 4.0948 | 0.3041 | 2790    | 2789.75  | 13042   | 1                                                   | 1319.7 | 30.2 | 1   | K.DDSTHESLSQSESEEDGIHVDSQK.A       |
| *             | HsFlag-FLJ20643_Ti | 3.2325 | 0.243  | 1592.34 | 1591.681 | 5030.1  | 5                                                   | 358.8  | 58.3 | 3   | K.QGKYDEAIDCYTK.G                  |
| *             | HsFlag-ZnF-HIT2_Ti | 2.9579 | 0.3015 | 1277.51 | 1278.324 | 5711.6  | 1                                                   | 741.1  | 77.8 | 5   | K.YDEAIDCYTK.G                     |
| *             | HsFlag-FLJ20643_Ti | 3.7424 | 0.27   | 1280.04 | 1278.324 | 6496.1  | 1                                                   | 1336.9 | 88.9 | 8   | K.YDEAIDCYTK.G                     |
| *             | HsFlag-NUFIP_Ti_1C | 3.8407 | 0.3524 | 1660.26 | 1660.842 | 4854.1  | 1                                                   | 1301.4 | 75   | 2   | K.GMDADPYNPVLPTNR.A                |
| *             | HsFLAG-p53-DNA-D   | 6.5629 | 0.4544 | 1878.09 | 1879.089 | 8908.8  | 1                                                   | 3855.7 | 87.5 | 13  | K.KFAVAESDCNLAVALNR.S              |
| *             | HsFlag-FLJ20643_Ti | 5.5771 | 0.4228 | 1750.57 | 1750.915 | 8040.7  | 1                                                   | 1935.4 | 73.3 | 113 | K.FAVAESDCNLAVALNR.S               |
| *             | HsFLAG-UTX1_Ti_2   | 3.3145 | 0.087  | 1178.37 | 1177.386 | 6314.7  | 6                                                   | 1055   | 77.8 | 9   | R.FALQKLEEAK.K                     |
| *             | HsFlag-FLJ20643_Ti | 5.3117 | 0.3834 | 1888.95 | 1889.072 | 3419.7  | 1                                                   | 790.5  | 76.7 | 42  | R.VLELEPNNFEATNELR.K               |
| *             | HsFLAG-RPB5MP_2    | 4.2731 | 0.2992 | 2016.5  | 2017.246 | 4713.4  | 1                                                   | 543.8  | 59.4 | 23  | R.VLELEPNNFEATNELRK.I              |
| *             | HsFlag-FLJ20643_Ti | 2.8175 | 0.0999 | 947.23  | 946.135  | 3805.7  | 1                                                   | 541.1  | 81.2 | 2   | R.KISQALASK.E                      |
| *             | HsFlag-FLJ20643_Ti | 2.9017 | 0.1159 | 818.46  | 817.961  | 4493.2  | 4                                                   | 787    | 85.7 | 1   | K.ISQALASK.E                       |
| *             | HsFlag-FLJ20643_Ti | 3.4515 | 0.1894 | 1537.35 | 1536.725 | 7283.6  | 3                                                   | 584.4  | 53.8 | 1   | K.ISQALASKENSYPK.E                 |
| *             | HsFLAG-UTX1_Ti_2   | 4.2246 | 0.2634 | 1424.41 | 1424.6   | 4325.7  | 1                                                   | 1047.8 | 78.6 | 16  | R.GIAADGANALLPANR.A                |
| *             | HsFlag-NUFIP_Ti_1C | 2.0903 | 0.2319 | 1424.92 | 1424.6   | 3109.2  | 2                                                   | 184.7  | 46.4 | 1   | R.GIAADGANALLPANR.A                |
| *             | HsFLAG-p53-DNA-D   | 2.6595 | 0.0885 | 1137.94 | 1138.263 | 5013.9  | 3                                                   | 622.2  | 81.2 | 1   | K.IQKYEEAEK.D                      |
| *             | HsFLAG-p53-DNA-D   | 4.652  | 0.3822 | 2689.34 | 2690.93  | 9065.5  | 1                                                   | 1172.5 | 47.7 | 2   | K.IQKYEEAEKDCTQAILLDGSYSK.A        |
| *             | HsFlag-FLJ20643_Ti | 3.8041 | 0.3267 | 2320.84 | 2321.466 | 9400.8  | 1                                                   | 1303   | 52.6 | 1   | K.YEEAEKDCTQAILLDGSYSK.A           |
| *             | HsFlag-FLJ20643_Ti | 3.9786 | 0.3434 | 1571.58 | 1571.691 | 5697.5  | 1                                                   | 844.1  | 69.2 | 13  | K.DCTQAILLDGSYSK.A                 |
| *             | HsFLAG-p53-DNA-D   | 5.5704 | 0.2047 | 1571.66 | 1571.691 | 7609    | 1                                                   | 2156.2 | 84.6 | 81  | K.DCTQAILLDGSYSK.A                 |
| *             | HsFLAG-UTX1_Ti_2   | 4.963  | 0.3513 | 2158.84 | 2159.444 | 6423.7  | 1                                                   | 1060.9 | 55.6 | 7   | K.LNEAKQDFETVLLLEPGNK.Q            |
| *             | HsFlag-FLJ20643_Ti | 4.5597 | 0.3292 | 1604.31 | 1603.813 | 9433.7  | 1                                                   | 1547.6 | 76.9 | 63  | K.QDFETVLLLEPGNK.Q                 |
| *             | HsFLAG-p53-DNA-D   | 3.7069 | 0.4036 | 1575.57 | 1576.665 | 7070.5  | 1                                                   | 1086.8 | 66.7 | 4   | K.GHWDDVFLDSTQR.Q                  |
| *             | HsFlag-NUFIP_Ti_1C | 4.5596 | 0.4257 | 1575.94 | 1576.665 | 7822.8  | 1                                                   | 1700.5 | 79.2 | 114 | K.GHWDDVFLDSTQR.Q                  |
| *             | HsFlag-NUFIP_Ti_1C | 3.8081 | 0.1395 | 1576.22 | 1576.665 | 8083.3  | 5                                                   | 1246.1 | 47.9 | 1   | K.GHWDDVFLDSTQR.Q                  |
| *             | HsFLAG-UTX1_Ti_2   | 3.8748 | 0.3545 | 1829.52 | 1829.066 | 5555    | 1                                                   | 552.7  | 53.1 | 6   | R.QNVVKPIDNPPHPGSK.P               |
| *             | HsFlag-NUFIP_Ti_11 | 4.1971 | 0.2479 | 1829.59 | 1829.066 | 8879.9  | 2                                                   | 1216.6 | 42.2 | 4   | R.QNVVKPIDNPPHPGSK.P               |

|               |                    |        |        |         |          |                                                                       |   |        |      |                                         |
|---------------|--------------------|--------|--------|---------|----------|-----------------------------------------------------------------------|---|--------|------|-----------------------------------------|
| *             | HsFLAG-p53-DNA-D   | 3.9613 | 0.1012 | 2168.4  | 2167.516 | 8682.7                                                                | 1 | 1250.9 | 38.2 | 1 R.QNVVVKPIDNPPHPGSTKPLK.K             |
| *             | HsFlag-FLJ20643_Ti | 2.4691 | 0.1523 | 1259.94 | 1260.392 | 6627                                                                  | 2 | 510.2  | 59.1 | 1 K.PIDNPPHPGSTK.P                      |
| *             | HsFlag-FLJ20643_Ti | 3.4362 | 0.2362 | 1260.68 | 1260.392 | 6359.1                                                                | 3 | 1025.9 | 72.7 | 5 K.PIDNPPHPGSTK.P                      |
| *             | HsFlag-NUFIP_Ti_11 | 3.305  | 0.2051 | 1598.68 | 1598.842 | 7339.6                                                                | 4 | 673    | 57.1 | 1 K.PIDNPPHPGSTKPLK.K                   |
| *             | HsFlag-NUFIP_Ti_1C | 5.5365 | 0.4219 | 4509.2  | 4508.037 | 6869                                                                  | 1 | 709.8  | 21.5 | 17 K.K                                  |
| *             | HsFlag-NUFIP_Ti_1C | 4.4519 | 0.3072 | 4507.21 | 4508.037 | 7038.8                                                                | 1 | 749.8  | 20.9 | 2 K.N                                   |
| *             | HsFLAG-UTX1_Ti_2i  | 5.6196 | 0.3638 | 2172.88 | 2173.469 | 4321.3                                                                | 1 | 988.4  | 42.1 | 4 K.VLKIEEVSDTSSLQPQASLK.Q              |
| *             | HsFLAG-p53-DNA-D   | 6.3    | 0.4578 | 2173.8  | 2173.469 | 7753.2                                                                | 1 | 2149.2 | 68.4 | 20 K.VLKIEEVSDTSSLQPQASLK.Q             |
| *             | HsFlag-FLJ20643_Ti | 5.3533 | 0.3832 | 1833.14 | 1833.003 | 6388.4                                                                | 1 | 1570.2 | 75   | 31 K.IEEVSDTSSLQPQASLK.Q                |
| *             | HsFlag-FLJ20643_Ti | 4.4672 | 0.3179 | 3058.54 | 3058.246 | 8288.5                                                                | 1 | 1387.3 | 34.6 | 1 K.IEEVSDTSSLQPQASLKQDVCQSYSEK.M       |
| *             | HsFlag-NUFIP_Ti_1C | 2.8207 | 0.2839 | 1245.26 | 1244.267 | 3691.8                                                                | 4 | 418.6  | 72.2 | 3 K.QDVCQSYSEK.M                        |
| *             | HsFlag-FLJ20643_Ti | 2.557  | 0.0876 | 987.53  | 988.187  | 5562                                                                  | 2 | 611.1  | 78.6 | 1 K.MPIEIEQK.P                          |
| *             | HsFlag-ZnF-HIT2_Ti | 5.1543 | 0.3966 | 3615.05 | 3617.154 | 5486.8                                                                | 2 | 380    | 22.6 | 36 K.MPIEIEQKPAQFATTVLPPIPANSFQLESDFR.Q |
| *             | HsFlag-NUFIP_Ti_1C | 4.7083 | 0.3391 | 2648.78 | 2647.99  | 4293.4                                                                | 1 | 548.2  | 50   | 17 K.PAQFATTVLPPIPANSFQLESDFR.Q         |
| *             | HsFLAG-p53-DNA-D   | 2.5763 | 0.1975 | 1344.49 | 1345.553 | 7331.9                                                                | 9 | 451.7  | 55   | 1 K.SSPDMLYQYLK.Q                       |
| *             | HsFLAG-p53-DNA-D   | 3.3362 | 0.2577 | 1345.33 | 1345.553 | 3353.5                                                                | 6 | 442.1  | 75   | 11 K.SSPDMLYQYLK.Q                      |
| *             | HsFlag-FLJ20643_Ti | 2.495  | 0.1791 | 1402.67 | 1402.59  | 3513.6                                                                | 2 | 413.1  | 63.6 | 2 K.NLDPDVFNQIVK.I                      |
| *             | HsFLAG-UTX1_Ti_2i  | 3.6891 | 0.3014 | 1402.89 | 1402.59  | 3443.3                                                                | 1 | 663    | 77.3 | 18 K.NLDPDVFNQIVK.I                     |
| *             | HsFlag-FLJ20643_Ti | 2.6608 | 0.1812 | 1177.67 | 1178.373 | 5375.7                                                                | 1 | 652.7  | 75   | 10 K.ILHDFYIEK.E                        |
| *             | HsFlag-NUFIP_Ti_1C | 3.0812 | 0.1556 | 1178.68 | 1178.373 | 5075.5                                                                | 1 | 793.6  | 87.5 | 13 K.ILHDFYIEK.E                        |
| *             | HsFLAG-p53-DNA-D   | 6.3037 | 0.3511 | 2658.78 | 2659.187 | 7238.6                                                                | 1 | 2529.5 | 48.8 | 4 K.ILHDFYIEKEKPLLIFEILQR.L             |
| *             | HsFLAG-p53-DNA-D   | 2.5717 | 0.2006 | 1498.88 | 1499.837 | 2956                                                                  | 4 | 195.6  | 59.1 | 1 K.EKPLLIFEILQR.L                      |
| *             | HsFlag-NUFIP_Ti_11 | 3.9368 | 0.2468 | 1499.5  | 1499.837 | 6451.5                                                                | 1 | 1316.8 | 86.4 | 55 K.EKPLLIFEILQR.L                     |
| *             | HsFlag-NUFIP_Ti_11 | 4.3279 | 0.3043 | 1242.36 | 1242.547 | 6656.4                                                                | 1 | 1656.9 | 94.4 | 21 K.PLLIFEILQR.L                       |
| *             | HsFlag-NUFIP_Ti_1C | 5.0511 | 0.47   | 1722.83 | 1723.03  | 8694.6                                                                | 1 | 2249.3 | 80.8 | 17 K.RFDMAVMFMSETEK.K                   |
| *             | HsFlag-NUFIP_Ti_1C | 3.087  | 0.1817 | 958.23  | 958.105  | 3971                                                                  | 1 | 754.6  | 92.9 | 25 R.ALFNHIDK.S                         |
| gi 30795231   | 8                  | 20     | 63.40% | 227     | 22693    | 4.6 brain abundant, membrane attached signal protein 1 [Homo sapiens] |   |        |      |                                         |
| *             | HsFLAG-ARP6_Ti_1   | 3.3309 | 0.316  | 1428.21 | 1428.496 | 6815.3                                                                | 1 | 1640.7 | 80.8 | 2 K.ESEPQAAAEPAEAK.E                    |
| *             | HsFLAG-ARP6_Ti_1   | 4.0613 | 0.1502 | 2298.56 | 2299.502 | 5149.1                                                                | 2 | 650    | 32.6 | 1 K.AEPPKAPEQEQAAPGPAAGGEAPK.A          |
| *             | HsFLAG-ARP6_Ti_1   | 4.7961 | 0.3958 | 1776.05 | 1776.9   | 3665                                                                  | 1 | 747.3  | 63.9 | 1 K.APEQEQAAPGPAAGGEAPK.A               |
| *             | HsFLAG-ARP6_Ti_1   | 3.8195 | 0.3308 | 2636.52 | 2637.773 | 4830.2                                                                | 1 | 427.3  | 37   | 3 K.AAEAAAAPAESAAPAAGEEPSKEEGEPK.K      |
| *             | HsFLAG-p53-DNA-D   | 4.8424 | 0.3281 | 1412.73 | 1413.571 | 5229                                                                  | 1 | 1207.5 | 80.8 | 4 K.KTEAPAAPAAQETK.S                    |
| *             | HsFLAG-p53-DNA-D   | 3.819  | 0.2585 | 1933.07 | 1933.981 | 6215.9                                                                | 1 | 656.1  | 47.5 | 2 K.SDGAPASDSKPGSSEAAPSSK.E             |
| *             | HsFLAG-ARP6_Ti_1   | 3.2337 | 0.3191 | 1387.41 | 1387.486 | 5460.8                                                                | 3 | 666.8  | 65.4 | 5 K.ETPAATEAPSSTPK.A                    |
| *             | HsFLAG-ARP6_Ti_1   | 5.6163 | 0.3948 | 2894.54 | 2894.122 | 6862.3                                                                | 1 | 1720.8 | 35.7 | 2 K.AQGPAASAEKPKVEAPAANSQDTVTVKE.-      |
| gi 4501885 re | 29                 | 925    | 62.90% | 375     | 41737    | 5.5 beta actin [Homo sapiens]                                         |   |        |      |                                         |
| gi 4501887 re | 29                 | 925    | 62.90% | 375     | 41793    | 5.5 actin, gamma 1 propeptide [Homo sapiens]                          |   |        |      |                                         |
|               | HsFLAG-ARP6_Ti_2   | 3.3564 | 0.3342 | 977.23  | 977.021  | 5082.6                                                                | 1 | 1225.5 | 88.9 | 17 K.AGFAGDDAPR.A                       |
|               | HsFlag-VPS71_Ti_1C | 2.159  | 0.1032 | 977.47  | 977.021  | 5226.9                                                                | 1 | 385.5  | 61.1 | 2 K.AGFAGDDAPR.A                        |
|               | HsFLAG-ARP5_Ti_1   | 3.43   | 0.2899 | 1199.05 | 1199.442 | 6548.6                                                                | 1 | 831.6  | 80   | 27 R.AVFPSIVGRPR.H                      |
|               | HsFLAG-TIP49a_Ti_  | 3.2318 | 0.3146 | 1171.37 | 1172.406 | 4944.3                                                                | 1 | 760.2  | 75   | 54 R.HQGVMVGMGQK.D                      |
|               | HsFLAG-p53-DNA-D   | 3.5553 | 0.3623 | 1172.01 | 1172.406 | 5155.7                                                                | 1 | 1022.8 | 85   | 49 R.HQGVMVGMGQK.D                      |
|               | HsFLAG-ARP8_Ti_2   | 3.7228 | 0.4    | 1198.34 | 1199.216 | 4824                                                                  | 1 | 494.9  | 65   | 7 K.DSYVGDEAQS.K.R                      |

|                    |        |        |         |          |         |                                                                  |        |      |     |                                       |
|--------------------|--------|--------|---------|----------|---------|------------------------------------------------------------------|--------|------|-----|---------------------------------------|
| HsFlag-VPS71_Ti_10 | 3.4611 | 0.3002 | 1199.21 | 1199.216 | 3911.9  | 1                                                                | 959.2  | 85   | 11  | K.DSYVGDEAQS.K.R                      |
| HsFLAG-p53-DNA-D   | 2.8615 | 0.2497 | 1355.19 | 1355.404 | 5881    | 1                                                                | 646.6  | 63.6 | 2   | K.DSYVGDEAQS.K.R.G                    |
| HsFLAG-TIP49b_Ti_  | 3.4873 | 0.339  | 1515.54 | 1516.702 | 6235.6  | 1                                                                | 470.4  | 65   | 12  | K.IWHHTFYNELR.V                       |
| HsFLAG-p53-DNA-D   | 3.5256 | 0.379  | 1516.47 | 1516.702 | 6570.8  | 1                                                                | 921.4  | 75   | 44  | K.IWHHTFYNELR.V                       |
| HsFLAG-ARP6_Ti_1   | 3.5437 | 0.1582 | 1517.38 | 1516.702 | 6065.3  | 1                                                                | 1106.2 | 57.5 | 2   | K.IWHHTFYNELR.V                       |
| HsFLAG-ARP6_Ti_1   | 4.9174 | 0.311  | 1954.66 | 1955.261 | 5544.9  | 1                                                                | 1253.1 | 70.6 | 126 | R.VAPEEHPVLLTEAPLNPK.A                |
| HsFLAG-RPB5MP_2    | 4.2199 | 0.2289 | 1955.32 | 1955.261 | 7535.1  | 2                                                                | 889.4  | 38.2 | 9   | R.VAPEEHPVLLTEAPLNPK.A                |
| HsFlag-DPCD_Ti_20  | 6.8014 | 0.4506 | 3184.41 | 3185.622 | 9447.8  | 1                                                                | 2159.6 | 34.5 | 71  | R.TTGIVMDSGDGVTHTVPIYEGYALPHAILR.L    |
| HsFlag-VPS71_Ti_10 | 4.4039 | 0.381  | 3185.72 | 3185.622 | 4009.7  | 1                                                                | 384.2  | 34.5 | 20  | R.TTGIVMDSGDGVTHTVPIYEGYALPHAILR.L    |
| HsFLAG-p53-DNA-D   | 2.7022 | 0.1896 | 998.54  | 999.167  | 6873.8  | 9                                                                | 806.7  | 78.6 | 9   | R.DLTDYLMK.I                          |
| HsFlag-DPCD_Ti_20  | 3.2886 | 0.3833 | 1133.04 | 1133.203 | 8829.6  | 1                                                                | 1635.8 | 88.9 | 22  | R.GYSFTTTAER.E                        |
| HsFLAG-ARP6_Ti_1   | 7.0209 | 0.5236 | 2551.96 | 2551.791 | 10583.7 | 1                                                                | 3086.5 | 61.4 | 147 | K.LCYVALDFEQEMATAASSSSLEK.S           |
| HsFLAG-ARP6_Ti_1   | 4.8294 | 0.2968 | 2553.82 | 2551.791 | 8405.8  | 1                                                                | 1387.9 | 37.5 | 6   | K.LCYVALDFEQEMATAASSSSLEK.S           |
| HsFLAG-Lin9_Ti_20  | 3.6505 | 0.1696 | 1791.77 | 1791.955 | 7019.8  | 1                                                                | 1188.6 | 45   | 2   | K.SYELPDGQVITIGNER.F                  |
| HsSrcap_Ti_202.259 | 5.2016 | 0.2868 | 1791.82 | 1791.955 | 5255.9  | 1                                                                | 1548   | 80   | 115 | K.SYELPDGQVITIGNER.F                  |
| HsFLAG-ARP6_Ti_1   | 7.2763 | 0.4542 | 3537.02 | 3536.974 | 8917.3  | 1                                                                | 2225.4 | 36.2 | 12  | R.FRCPEALFQPSFLGMESCGIHETTFFNSIMK.C   |
| HsFLAG-ARP8_Ti_2   | 5.7731 | 0.4192 | 3235.09 | 3233.61  | 5258    | 1                                                                | 782.6  | 30.6 | 39  | R.CPEALFQPSFLGMESCGIHETTFFNSIMK.C     |
| HsFLAG-p53-DNA-D   | 6.4056 | 0.5053 | 2343.3  | 2344.645 | 7130.2  | 1                                                                | 1400.7 | 59.5 | 9   | R.KDLYANTVLSGGTMYPGIADR.M             |
| HsFLAG-p53-DNA-D   | 5.4325 | 0.3458 | 2346.45 | 2344.645 | 7814.2  | 1                                                                | 1648.5 | 41.7 | 6   | R.KDLYANTVLSGGTMYPGIADR.M             |
| HsFLAG-ARP6_Ti_1   | 5.2133 | 0.4255 | 2215.38 | 2216.471 | 9210.3  | 1                                                                | 1666.4 | 60   | 62  | K.DLYANTVLSGGTMYPGIADR.M              |
| HsFLAG-ARP6_Ti_1   | 2.8881 | 0.328  | 1161.46 | 1162.387 | 4673.7  | 1                                                                | 620.1  | 75   | 20  | K.EITALAPSTMK.I                       |
| HsFLAG-ARP6_Ti_1   | 2.895  | 0.2843 | 1161.87 | 1162.387 | 4881.7  | 1                                                                | 872.9  | 80   | 8   | K.EITALAPSTMK.I                       |
| HsFLAG-TIP49b_Ti_  | 3.7056 | 0.1119 | 1518.27 | 1517.595 | 7339.9  | 1                                                                | 1239.5 | 75   | 15  | K.QEYDESGPSIVHR.K                     |
| gij 38455427 r     | 25     | 152    | 62.30%  | 539      | 57924   | 7.8 chaperonin containing TCP1, subunit 4 (delta) [Homo sapiens] |        |      |     |                                       |
| HsFLAG-TCF3_Ti_10  | 1.9042 | 0.0915 | 837.42  | 837.951  | 6621.4  | 3                                                                | 475.4  | 64.3 | 2   | R.FSNISAAK.A                          |
| * HsFLAG-ARP6_Ti_1 | 5.0658 | 0.3183 | 2091.34 | 2091.384 | 7840.6  | 1                                                                | 1891.7 | 68.4 | 3   | K.MIQDGKGDVTITNDGATILK.Q              |
| * HsFLAG-ARP6_Ti_1 | 3.0607 | 0.1396 | 1150.4  | 1151.372 | 5743.4  | 1                                                                | 1156.4 | 88.9 | 2   | K.QMQVLHPAAR.M                        |
| * HsFLAG-ARP6_Ti_1 | 5.8144 | 0.5241 | 2620.73 | 2622.852 | 7185    | 1                                                                | 1834.9 | 58   | 10  | K.AQDIEAGDGTTSVVIAGSLLDSC.T.L         |
| * HsFLAG-ARP6_Ti_1 | 3.4969 | 0.3917 | 1456.72 | 1457.67  | 6188.7  | 1                                                                | 786.3  | 62.5 | 2   | K.GIHPTIISESFQK.A                     |
| * HsFLAG-ARP6_Ti_1 | 3.6931 | 0.4173 | 1457.4  | 1457.67  | 3811.9  | 1                                                                | 715.9  | 79.2 | 16  | K.GIHPTIISESFQK.A                     |
| * HsFLAG-ARP6_Ti_1 | 3.9312 | 0.2221 | 1459.95 | 1457.67  | 5628    | 8                                                                | 906.9  | 50   | 4   | K.GIHPTIISESFQK.A                     |
| * HsFLAG-ARP6_Ti_1 | 5.0702 | 0.4369 | 3389.96 | 3392.804 | 9914.5  | 4                                                                | 473.6  | 20.8 | 6   | K.GIEILDMSRPVELSDRETLNLSATTSLNSK.V    |
| * HsFLAG-ARP6_Ti_1 | 5.5812 | 0.3126 | 2040.69 | 2041.429 | 4804.6  | 1                                                                | 1467.3 | 69.4 | 4   | K.VVSQYSLLSPMSVNAV.MK.V               |
| * HsFLAG-ARP6_Ti_1 | 4.6887 | 0.3941 | 1358.28 | 1358.535 | 6950.4  | 1                                                                | 1620.5 | 83.3 | 3   | K.VIDPATATSVDLR.D                     |
| * HsFLAG-ARP6_Ti_1 | 6.6163 | 0.5017 | 2188.81 | 2189.477 | 8436.9  | 1                                                                | 2289.5 | 68.4 | 12  | K.KLGGTIDDCELVEGLVLTQK.V              |
| * HsFLAG-ARP6_Ti_1 | 4.1616 | 0.268  | 2189.18 | 2189.477 | 7832.9  | 1                                                                | 1076.5 | 36.8 | 4   | K.KLGGTIDDCELVEGLVLTQK.V              |
| * HsFLAG-ARP6_Ti_1 | 4.9137 | 0.4705 | 2061.12 | 2061.303 | 8539.6  | 1                                                                | 1615.4 | 61.1 | 11  | K.LGGTIDDCELVEGLVLTQK.V               |
| * HsFLAG-ARP6_Ti_1 | 3.1748 | 0.2373 | 1190.56 | 1190.342 | 8688    | 2                                                                | 1138.5 | 75   | 2   | K.VSNSGITRVEK.A                       |
| * HsFLAG-ARP6_Ti_1 | 4.227  | 0.2476 | 1347.16 | 1347.607 | 5482.2  | 2                                                                | 788.1  | 72.7 | 10  | K.IGLIQFCLSAPK.T                      |
| * HsFLAG-ARP6_Ti_1 | 3.7365 | 0.2181 | 1146.28 | 1146.339 | 7002.8  | 1                                                                | 1282.3 | 83.3 | 1   | K.TGCNVLIIQK.S                        |
| * HsFLAG-ARP6_Ti_1 | 5.0861 | 0.3174 | 1458.21 | 1457.67  | 8242.3  | 1                                                                | 1945.1 | 79.2 | 25  | R.DALSDLALHFLNK.M                     |
| * HsFLAG-ARP6_Ti_1 | 3.5476 | 0.2454 | 1567.25 | 1567.702 | 6261.4  | 2                                                                | 740.3  | 63.6 | 10  | K.DIEREDIEFICK.T                      |
| * HsFLAG-ARP6_Ti_1 | 4.5576 | 0.2997 | 3515.03 | 3515.917 | 9715.5  | 3                                                                | 617.3  | 20.5 | 2   | K.TIGTKPVAHIDQFTADMLGSAELAEVNLNGSGK.L |

|                 |                    |        |        |         |          |         |                                           |        |      |     |                                         |
|-----------------|--------------------|--------|--------|---------|----------|---------|-------------------------------------------|--------|------|-----|-----------------------------------------|
| *               | HsFLAG-ARP6_Ti_1   | 5.1591 | 0.4296 | 1708.58 | 1708.014 | 7998    | 1                                         | 1951.4 | 75   | 10  | K.RALIAGGGAPEIELALR.L                   |
| *               | HsFLAG-ARP6_Ti_1   | 3.8759 | 0.1353 | 1708.97 | 1708.014 | 5111.4  | 1                                         | 1543.1 | 51.6 | 4   | K.RALIAGGGAPEIELALR.L                   |
| *               | HsFLAG-ARP6_Ti_1   | 4.8549 | 0.343  | 1553.77 | 1551.826 | 4938.2  | 1                                         | 1248.2 | 80   | 4   | R.ALIAGGGAPEIELALR.L                    |
| *               | HsFLAG-ARP6_Ti_1   | 3.9655 | 0.3746 | 3031.42 | 3032.436 | 9781.8  | 1                                         | 821.1  | 35.7 | 2   | R.AFADAMEVIPSTLAENAGLNPISTV/TEL.R.N     |
| *               | HsFLAG-Lin9_Ti_20  | 4.7841 | 0.4258 | 3125.27 | 3123.658 | 10483.2 | 1                                         | 1215.9 | 26.7 | 2   | K.GGISNILEELVVQPLLVSVALTLATETVR.S       |
| *               | HsFLAG-ARP6_Ti_1   | 2.6919 | 0.1683 | 932.19  | 932.021  | 4674.5  | 9                                         | 854.2  | 85.7 | 1   | K.IDDVVNT.R.-                           |
| gij 12408675 re |                    | 14     | 289    | 62.30%  | 154      | 16648   | 6.6 prefoldin 2 [Homo sapiens]            |        |      |     |                                         |
| *               | HsFLAG-p53-DNA-D   | 3.2928 | 0.4131 | 2050.73 | 2051.224 | 7438.8  | 1                                         | 410.4  | 35.7 | 1   | K.SSGSGAGKGAVSAEQVIAGFNR.L              |
| *               | HsFLAG-UTX1_Ti_2   | 4.4992 | 0.3474 | 1419.3  | 1419.58  | 6761.9  | 1                                         | 1595.6 | 76.9 | 47  | K.GAVSAEQVIAGFNR.L                      |
| *               | HsFlag-FLJ20643_Ti | 3.853  | 0.3697 | 1419.74 | 1419.58  | 3067.1  | 1                                         | 311.9  | 65.4 | 10  | K.GAVSAEQVIAGFNR.L                      |
| *               | HsFlag-NUFIP_Ti_1C | 4.8872 | 0.3537 | 2156.6  | 2156.456 | 5994.4  | 1                                         | 1333.8 | 41.7 | 27  | K.AAELEMELNEHSLVIDTLK.E                 |
| *               | HsFlag-NUFIP_Ti_11 | 6.1162 | 0.3371 | 2159.08 | 2156.456 | 10952.9 | 1                                         | 2677.8 | 66.7 | 131 | K.AAELEMELNEHSLVIDTLK.E                 |
| *               | HsFLAG-p53-DNA-D   | 3.2629 | 0.1535 | 960.27  | 960.18   | 4014.2  | 9                                         | 836.9  | 93.8 | 2   | R.MVGGV.LVER.T                          |
| *               | HsFLAG-RPB5MP_2    | 2.3626 | 0.1359 | 1126.38 | 1127.283 | 4142.8  | 5                                         | 387.5  | 72.2 | 1   | K.EVLPALENNK.E                          |
| *               | HsFLAG-p53-DNA-D   | 2.8893 | 0.108  | 1127.23 | 1127.283 | 3481.5  | 6                                         | 476.4  | 72.2 | 2   | K.EVLPALENNK.E                          |
| *               | HsFLAG-p53-DNA-D   | 3.8966 | 0.3191 | 1753.28 | 1753.993 | 5843.5  | 1                                         | 822.9  | 67.9 | 2   | K.EVLPALENNKEQIQK.I                     |
| *               | HsFLAG-RPB5MP_2    | 5.4604 | 0.301  | 1385.72 | 1386.632 | 6395.6  | 1                                         | 1550.5 | 86.4 | 47  | K.IIETLTQQLQAK.G                        |
| *               | HsFlag-FLJ20643_Ti | 3.4351 | 0.2079 | 1386.72 | 1386.632 | 7519    | 1                                         | 703    | 63.6 | 9   | K.IIETLTQQLQAK.G                        |
| *               | HsFLAG-p53-DNA-D   | 2.5704 | 0.1215 | 993.42  | 993.108  | 4959.1  | 3                                         | 829.5  | 85.7 | 1   | K.GKELNEFR.E                            |
| *               | HsFlag-FLJ20643_Ti | 2.9176 | 0.1316 | 1188.66 | 1189.369 | 6777.5  | 3                                         | 649    | 65   | 2   | R.LMGEDKPAK.E                           |
| *               | HsFlag-FLJ20643_Ti | 3.118  | 0.2452 | 1191.96 | 1189.369 | 6751.6  | 6                                         | 1057.9 | 80   | 7   | R.LMGEDKPAK.E                           |
| gij 4506687 re  |                    | 8      | 76     | 62.10%  | 145      | 17040   | 10.4 ribosomal protein S15 [Homo sapiens] |        |      |     |                                         |
|                 | HsFlag-NUFIP_Ti_1C | 6.1589 | 0.4628 | 2589.35 | 2589.938 | 10695.7 | 1                                         | 2366.1 | 57.1 | 16  | R.GVDLDQLLDMSYEQLMQLYSAR.Q              |
|                 | HsFlag-NUFIP_Ti_1C | 2.7211 | 0.2618 | 1354.52 | 1354.604 | 3224.4  | 4                                         | 304.1  | 68.2 | 1   | K.EAPPMEKPEVVK.T                        |
|                 | HsFlag-NUFIP_Ti_1C | 6.144  | 0.5298 | 2054.21 | 2054.486 | 5835.1  | 1                                         | 1863.2 | 75   | 8   | R.DMIILPEMVGSMGVYNGK.T                  |
|                 | HsFlag-FLJ90652_2  | 2.639  | 0.2531 | 2844.87 | 2846.27  | 5615.2  | 1                                         | 285.5  | 32.6 | 1   | K.TFNQVEIKPEMIGHYLGFEFSITYK.P           |
|                 | HsFlag-NUFIP_Ti_11 | 5.7685 | 0.2634 | 2846.18 | 2846.27  | 9571.2  | 1                                         | 1382.1 | 34.8 | 21  | K.TFNQVEIKPEMIGHYLGFEFSITYK.P           |
|                 | HsFLAG-ARP6_Ti_1   | 6.9746 | 0.4562 | 3170.81 | 3170.694 | 8379.4  | 1                                         | 1089.1 | 30.8 | 25  | K.TFNQVEIKPEMIGHYLGFEFSITYKPVK.H        |
|                 | HsFlag-NUFIP_Ti_1C | 2.3809 | 0.2428 | 982.51  | 983.072  | 4937.5  | 1                                         | 331.4  | 66.7 | 1   | R.PGIGATHSSR.F                          |
|                 | HsFlag-NUFIP_Ti_1C | 2.9849 | 0.3096 | 984.43  | 983.072  | 6628.2  | 1                                         | 917.8  | 83.3 | 3   | R.PGIGATHSSR.F                          |
| gij 4505293 re  |                    | 29     | 54     | 62.00%  | 700      | 78764   | 6.9 MYB-related protein B [Homo sapiens]  |        |      |     |                                         |
| *               | HsFLAG-Lin9_Ti_20  | 4.7115 | 0.4625 | 2722.35 | 2722.761 | 7215.4  | 1                                         | 1241.9 | 54.8 | 1   | R.TRCEDLDELHYQDSDVPEQR.D                |
| *               | HsFLAG-Lin9_Ti_20  | 5.9805 | 0.3774 | 2722.38 | 2722.761 | 7894.9  | 1                                         | 1754.4 | 40.5 | 2   | R.TRCEDLDELHYQDSDVPEQR.D                |
| *               | HsFLAG-Lin9_Ti_20  | 5.2878 | 0.3111 | 2467.22 | 2465.469 | 8638.4  | 1                                         | 1353.4 | 57.9 | 1   | R.CEDLDELHYQDSDVPEQR.D                  |
| *               | HsFLAG-Lin9_Ti_20  | 2.8784 | 0.1935 | 1343.28 | 1343.395 | 5511.5  | 1                                         | 1004.4 | 88.9 | 1   | K.WTHEEDEQLR.A                          |
| *               | HsFLAG-Lin9_Ti_20  | 2.8541 | 0.2049 | 1090.3  | 1089.242 | 7772.4  | 2                                         | 888.3  | 75   | 2   | K.FLASHFPNR.T                           |
| *               | HsFLAG-Lin9_Ti_20  | 3.2949 | 0.204  | 1274.15 | 1274.425 | 7167.9  | 1                                         | 997.5  | 77.8 | 2   | R.WHNHLNPEVK.K                          |
| *               | HsFLAG-Lin9_Ti_20  | 3.7341 | 0.3821 | 1832.63 | 1833.098 | 3208.6  | 1                                         | 704    | 75   | 3   | K.DCKPPVYLLLELEDK.D                     |
| *               | HsFLAG-Lin9_Ti_20  | 4.8699 | 0.1252 | 1832.78 | 1833.098 | 7704.2  | 2                                         | 2371.4 | 55.4 | 2   | K.DCKPPVYLLLELEDK.D                     |
| *               | HsFLAG-Lin9_Ti_20  | 4.0084 | 0.1473 | 4542.79 | 4542.865 | 5664.2  | 1                                         | 516.2  | 20.2 | 1   | TTSK.E                                  |
| *               | HsFLAG-Lin9_Ti_20  | 3.5522 | 0.4046 | 3001.49 | 3002.261 | 9278.1  | 3                                         | 287.9  | 28   | 1   | R.TPEPLEEFPKREDQEGSPPETSLPYK.W          |
| *               | HsFLAG-Lin9_Ti_20  | 4.118  | 0.3299 | 3003.46 | 3002.261 | 9072.3  | 1                                         | 920.5  | 29   | 1   | R.TPEPLEEFPKREDQEGSPPETSLPYK.W          |
| *               | HsFLAG-Lin9_Ti_20  | 3.7866 | 0.2034 | 3885.35 | 3886.311 | 5394.7  | 1                                         | 505.9  | 22.9 | 1   | K.WVVEAANLLIPAVGSSLSEALDIESDPDAWCDSLK.F |

|               |                    |        |        |         |          |         |                                                       |        |      |                                       |
|---------------|--------------------|--------|--------|---------|----------|---------|-------------------------------------------------------|--------|------|---------------------------------------|
| *             | HsFLAG-Lin9_Ti_20  | 3.7993 | 0.2577 | 3587.97 | 3588.913 | 3731.7  | 1                                                     | 414    | 25.8 | 2 K.FDLPEEPSAEDSINNSLVQLQASHQQVLPFR.Q |
| *             | HsFLAG-Lin9_Ti_20  | 3.0154 | 0.2858 | 1213.45 | 1214.321 | 6502.7  | 1                                                     | 1072.6 | 85   | 2 R.LDGHTISDLR.S                      |
| *             | HsFLAG-Lin9_Ti_20  | 3.8431 | 0.2312 | 2725.78 | 2724.084 | 6909.2  | 1                                                     | 1190.6 | 30.6 | 1 R.SSRGELIPISPSTEVGGSGIGTPPSVLK.R    |
| *             | HsFLAG-Lin9_Ti_20  | 4.1956 | 0.2152 | 2392.7  | 2393.74  | 7052    | 1                                                     | 1161.4 | 50   | 4 R.GELIPISPSTEVGGSGIGTPPSVLK.R       |
| *             | HsFLAG-Lin9_Ti_20  | 4.3249 | 0.4118 | 2667.7  | 2668.924 | 6671.7  | 1                                                     | 668.6  | 41.7 | 5 R.VALSPVTENSTLSFLDSCNSLTPK.S        |
| *             | HsFLAG-Lin9_Ti_20  | 3.4455 | 0.2349 | 1825.9  | 1827.092 | 3495.7  | 1                                                     | 430    | 67.9 | 4 K.TLPFSPSQFLNFWNK.Q                 |
| *             | HsFLAG-Lin9_Ti_20  | 4.972  | 0.5058 | 2220.55 | 2221.389 | 6528.3  | 1                                                     | 1135.5 | 60.5 | 2 K.QDTLELESPLSTSTPVCSQK.V            |
| *             | HsFLAG-Lin9_Ti_20  | 2.8045 | 0.0899 | 1021.82 | 1022.236 | 6878.7  | 7                                                     | 733.7  | 75   | 1 K.VVVTPLHR.D                        |
| *             | HsFLAG-Lin9_Ti_20  | 3.0112 | 0.3062 | 1113.5  | 1114.246 | 7031.2  | 1                                                     | 890.2  | 72.2 | 2 K.HAAFVTPDQK.Y                      |
| *             | HsFLAG-Lin9_Ti_20  | 3.9645 | 0.373  | 1114.18 | 1114.246 | 6958    | 1                                                     | 1202.6 | 83.3 | 1 K.HAAFVTPDQK.Y                      |
| *             | HsFLAG-Lin9_Ti_20  | 3.1442 | 0.3467 | 1635.43 | 1636.819 | 8737.2  | 1                                                     | 762.5  | 57.7 | 1 K.YSMDNTPHTPTPFK.N                  |
| *             | HsFLAG-Lin9_Ti_20  | 3.683  | 0.3304 | 2075.53 | 2076.4   | 4143.7  | 1                                                     | 594.4  | 61.8 | 1 K.YGPLKPLPQTPHLEEDLK.E              |
| *             | HsFLAG-Lin9_Ti_20  | 3.4792 | 0.1922 | 1927.36 | 1928.147 | 10132.8 | 5                                                     | 740.6  | 46.9 | 2 R.SEAGIELIEDDIRPEK.Q                |
| *             | HsFLAG-Lin9_Ti_20  | 4.2366 | 0.2462 | 1317.34 | 1317.479 | 6518.2  | 1                                                     | 1726.2 | 86.4 | 3 K.SLALDIVDEDVK.L                    |
| *             | HsFLAG-Lin9_Ti_20  | 3.1335 | 0.3423 | 2064.91 | 2062.325 | 4119.1  | 1                                                     | 343.4  | 45   | 2 K.SLSLPTTAPSNSSSLTSLGIK.E           |
| *             | HsFLAG-Lin9_Ti_20  | 3.6591 | 0.3086 | 1932.13 | 1932.141 | 8493.5  | 3                                                     | 724.2  | 50   | 1 K.EDNSLLNQGFLQAKPEK.A               |
| *             | HsFLAG-Lin9_Ti_20  | 3.1659 | 0.1601 | 1547.58 | 1548.756 | 4835.6  | 2                                                     | 621.4  | 57.7 | 2 R.SHFTTPAPMSSAWK.T                  |
| gij7657162 re | 10                 | 234    | 62.00% | 129     | 14583    | 8.9     | HLA class II region expressed gene KE2 [Homo sapiens] |        |      |                                       |
| *             | HsFLAG-p53-DNA-D   | 2.2777 | 0.1107 | 930.48  | 931.077  | 6132.4  | 3                                                     | 529.8  | 71.4 | 1 K.KLQGEVEK.Y                        |
| *             | HsFlag-NUFIP_Ti_10 | 5.2555 | 0.3291 | 3145.86 | 3144.593 | 9240.8  | 1                                                     | 926.9  | 26.9 | 47 R.QKLEAQLTENNIVKEELALLDGSNVVFK.L   |
| *             | HsFlag-NUFIP_Ti_11 | 5.0319 | 0.268  | 2889.36 | 2888.288 | 6274.5  | 1                                                     | 1287.6 | 35   | 13 K.LEAQLTENNIVKEELALLDGSNVVFK.L     |
| *             | HsFlag-NUFIP_Ti_10 | 5.5031 | 0.3872 | 2889.38 | 2888.288 | 9809.8  | 1                                                     | 1531.2 | 46   | 30 K.LEAQLTENNIVKEELALLDGSNVVFK.L     |
| *             | HsFlag-FLJ20643_Ti | 4.4865 | 0.3479 | 1536.61 | 1534.75  | 7146.3  | 1                                                     | 1127.3 | 73.1 | 6 K.EELALLDGSNVVFK.L                  |
| *             | HsFLAG-RPB5MP_2    | 4.5048 | 0.3988 | 1622.59 | 1622.949 | 7101.3  | 1                                                     | 1355.1 | 75   | 5 K.LLGPVLVKQELGEAR.A                 |
| *             | HsFLAG-BC014022_   | 3.6841 | 0.2974 | 1220.73 | 1222.427 | 4052.5  | 1                                                     | 760.9  | 83.3 | 78 K.RLDYITAEIK.R                     |
| *             | HsFLAG-p53-DNA-D   | 3.2173 | 0.1306 | 952.42  | 952.058  | 8058.4  | 2                                                     | 1312.4 | 100  | 8 K.RYESQLR.D                         |
| *             | HsFLAG-p53-DNA-D   | 2.7824 | 0.2024 | 1490.76 | 1491.644 | 2521.2  | 1                                                     | 137.6  | 59.1 | 2 R.ETLAQLQQEFQR.A                    |
| *             | HsFLAG-RPB5MP_2    | 4.5543 | 0.3949 | 1491.24 | 1491.644 | 8232.9  | 1                                                     | 1413.1 | 77.3 | 44 R.ETLAQLQQEFQR.A                   |
| gij6005814 re | 40                 | 1059   | 61.90% | 465     | 54190    | 7.2     | serine/threonine kinase 38 [Homo sapiens]             |        |      |                                       |
| *             | HsFlag-ZnF-HIT2_Ti | 2.7246 | 0.1218 | 865.26  | 865.036  | 6051.2  | 7                                                     | 762.3  | 91.7 | 1 K.ERVMTMK.V                         |
| *             | HsARP6-FLAG_Ti_1   | 4.5685 | 0.2601 | 2064.4  | 2064.262 | 5185.8  | 1                                                     | 1315.7 | 53.1 | 39 K.VTLENFYNSLIAQHEER.E              |
| *             | HsFLAG-ARP6_Ti_1   | 5.5446 | 0.4512 | 2064.75 | 2064.262 | 7373.3  | 1                                                     | 1439.8 | 68.8 | 115 K.VTLENFYNSLIAQHEER.E             |
| *             | HsFLAG-ARP8_Ti_1   | 2.0129 | 0.1323 | 934.23  | 935.08   | 8371.7  | 7                                                     | 637.4  | 71.4 | 1 K.VMEEEEGLK.D                       |
| *             | HsFlag-VPS71_Ti_10 | 3.2089 | 0.2189 | 1435.49 | 1436.574 | 5820.6  | 1                                                     | 535.2  | 59.1 | 1 K.VMEEEEGLKDEEK.R                   |
| *             | HsFlag-ZnF-HIT2_Ti | 4.38   | 0.2646 | 1436.52 | 1436.574 | 8186.8  | 1                                                     | 1767   | 86.4 | 20 K.VMEEEEGLKDEEK.R                  |
| *             | HsMRGBP-FLAG_Ti    | 4.3603 | 0.3035 | 1592.74 | 1592.761 | 9172.4  | 1                                                     | 2375   | 87.5 | 6 K.VMEEEEGLKDEEK.L                   |
| *             | HsFLAG-RPB5MP_2    | 2.9113 | 0.1535 | 1408.44 | 1408.594 | 7692.4  | 5                                                     | 652    | 54.5 | 1 R.TRLGLEDFESLK.V                    |
| *             | HsFLAG-p53-DNA-D   | 2.8647 | 0.1979 | 1150.52 | 1151.302 | 8712    | 1                                                     | 903.6  | 72.2 | 19 R.LGLEDFESLK.V                     |
| *             | HsFlag-FLJ90652_2  | 3.7875 | 0.1378 | 1150.65 | 1151.302 | 5873.8  | 1                                                     | 1233.8 | 88.9 | 50 R.LGLEDFESLK.V                     |
| *             | HsFLAG-ARP5_Ti_1   | 2.269  | 0.2903 | 1149.5  | 1150.338 | 4615    | 1                                                     | 400.1  | 55.6 | 1 K.KDTGHVYAMK.I                      |
| *             | HsFLAG-ARP5_Ti_1   | 3.5662 | 0.333  | 1150.3  | 1150.338 | 7912    | 1                                                     | 1455.6 | 88.9 | 5 K.KDTGHVYAMK.I                      |
| *             | HsFlag-VPS71_Ti_10 | 2.5808 | 0.2872 | 1021.43 | 1022.164 | 5424.5  | 2                                                     | 711.5  | 68.8 | 15 K.DTGHVYAMK.I                      |
| *             | HsARP6-FLAG_Ti_1   | 5.4478 | 0.1938 | 1488.81 | 1487.736 | 6264    | 1                                                     | 1839   | 87.5 | 56 R.DILVEADSLWVVK.M                  |

|               |                     |        |        |         |          |         |   |        |      |     |                                                 |
|---------------|---------------------|--------|--------|---------|----------|---------|---|--------|------|-----|-------------------------------------------------|
| *             | HsFLAG-ARP6_Ti_1    | 2.2059 | 0.115  | 1065.34 | 1066.216 | 6161.4  | 5 | 554.4  | 71.4 | 2   | K.MFYSFQDK.L                                    |
| *             | HsFlag-FLJ90652_29  | 9.3978 | 0.2522 | 3619.35 | 3620.053 | 10716.6 | 1 | 3073.1 | 35.8 | 30  | K.KDTLTEEETQFYIAETVLAIDSIHQLGFIHR.D             |
| *             | HsFLAG-ARP6_Ti_1    | 7.3167 | 0.4073 | 3490.93 | 3491.879 | 7001.9  | 1 | 1196.6 | 32.8 | 45  | K.DTLTEEETQFYIAETVLAIDSIHQLGFIHR.D              |
| *             | HsFLAG-ARP8_Ti_2    | 2.7648 | 0.2017 | 1371.67 | 1371.574 | 6021.6  | 1 | 546.4  | 59.1 | 6   | R.DIKPDNLLLDSK.G                                |
| *             | HsFLAG-UTX1_Ti_20   | 3.5199 | 0.1874 | 1371.7  | 1371.574 | 3051.3  | 1 | 631.2  | 77.3 | 50  | R.DIKPDNLLLDSK.G                                |
| *             | HsFlag-FLJ90652_29  | 2.8592 | 0.2419 | 1210.54 | 1211.367 | 4516.1  | 1 | 485.6  | 65   | 28  | K.LSDFGLCTGLK.K                                 |
| *             | HsFlag-FLJ90652_29  | 4.2329 | 0.2928 | 1211.36 | 1211.367 | 6417.2  | 1 | 1697.6 | 90   | 38  | K.LSDFGLCTGLK.K                                 |
| *             | HsFLAG-ARP6_Ti_1    | 3.4297 | 0.2592 | 1339.36 | 1339.541 | 6565.3  | 1 | 1017.5 | 77.3 | 7   | K.LSDFGLCTGLK.K                                 |
| *             | HsFlag-NUFIP_Ti_20  | 5.4955 | 0.3255 | 2094.72 | 2095.294 | 10620.5 | 1 | 1852.3 | 44.1 | 31  | R.NLNHSLPSDFTFQNMNSK.R                          |
| *             | HsFlag-VPS71_Ti_10  | 5.4843 | 0.378  | 2094.78 | 2095.294 | 4193.8  | 1 | 837.2  | 64.7 | 78  | R.NLNHSLPSDFTFQNMNSK.R                          |
| *             | HsFLAG-ARP6_Ti_1    | 5.0336 | 0.312  | 2933.79 | 2935.324 | 6800    | 1 | 990.4  | 33   | 3   | R.RQLAFSTVGTDPDYIAPEVFMQTGYNK.L                 |
| *             | HsFlag-VPS71_Ti_10  | 4.8257 | 0.5003 | 2934.94 | 2935.324 | 6427.8  | 1 | 849.1  | 42   | 2   | R.RQLAFSTVGTDPDYIAPEVFMQTGYNK.L                 |
| *             | HsFlag-NUFIP_Ti_10  | 3.8324 | 0.4498 | 2777.84 | 2779.136 | 4826.6  | 1 | 424.7  | 39.6 | 7   | R.QLAFSTVGTDPDYIAPEVFMQTGYNK.L                  |
| *             | HsFlag-VPS71_Ti_10  | 5.2229 | 0.3686 | 2779.25 | 2779.136 | 8765.6  | 1 | 1493.1 | 35.4 | 6   | R.QLAFSTVGTDPDYIAPEVFMQTGYNK.L                  |
| *             | HsFlag-FLJ90652_29  | 2.6181 | 0.2415 | 1586.87 | 1587.81  | 3285.2  | 1 | 251.8  | 53.8 | 3   | K.ETLTFPPEVPISEK.A                              |
| *             | HsFlag-ZnF-HIT2_Ti  | 3.4366 | 0.338  | 1587.63 | 1587.81  | 3042.7  | 1 | 684.9  | 80.8 | 32  | K.ETLTFPPEVPISEK.A                              |
| *             | HsFlag-FLJ90652_29  | 2.1546 | 0.2229 | 1223.32 | 1224.25  | 4214.9  | 5 | 236.3  | 64.3 | 3   | R.FCCEWEHR.I                                    |
| *             | HsFlag-NUFIP_Ti_20  | 3.2432 | 0.2657 | 1223.77 | 1224.25  | 5748.6  | 1 | 1058.4 | 92.9 | 27  | R.FCCEWEHR.I                                    |
| *             | HsFLAG-Lin9_Ti_20   | 2.4715 | 0.1856 | 1012.47 | 1013.179 | 4784.9  | 1 | 577.3  | 66.7 | 25  | R.IGAPGVVEIK.S                                  |
| *             | Hs293Flag-les2_Ti_1 | 3.3037 | 0.2662 | 1012.53 | 1013.179 | 3507.8  | 1 | 844.7  | 88.9 | 36  | R.IGAPGVVEIK.S                                  |
| *             | HsH2AZ-FLAG_293_    | 4.4022 | 0.4503 | 1722.94 | 1723.842 | 6310.2  | 1 | 1416.5 | 76.9 | 105 | K.SNSFFEGVDWEHIR.E                              |
| *             | HsFLAG-ARP8_Ti_2    | 3.5686 | 0.2308 | 1723.26 | 1723.842 | 6563.6  | 1 | 1092.6 | 48.1 | 2   | K.SNSFFEGVDWEHIR.E                              |
| *             | HsFlag-NUFIP_Ti_20  | 3.5186 | 0.2869 | 1227.22 | 1227.447 | 6664.5  | 1 | 1154.5 | 85   | 16  | R.ERPAAISIEIK.S                                 |
| *             | HsFLAG-ARP6_Ti_1    | 6.3235 | 0.4817 | 3615.28 | 3614.812 | 8339.2  | 1 | 1298.4 | 29.8 | 85  | K.SIDDTSNFDEFPESDILKPTVATSNHPETDYK.N            |
| *             | HsFLAG-p53-DNA-D    | 4.5027 | 0.3631 | 1591.45 | 1591.806 | 6205.4  | 1 | 1332.2 | 81.8 | 6   | K.NKDWWFINYTYK.R                                |
| *             | HsFlag-NUFIP_Ti_10  | 3.545  | 0.1914 | 950.45  | 950.085  | 7967.8  | 2 | 1149.9 | 92.9 | 56  | K.RFEGLTAR.G                                    |
| gi 5729838 re |                     | 24     | 178    | 61.70%  | 227      | 26499   |   |        |      |     | 8.4 glioma-amplified sequence-41 [Homo sapiens] |
| *             | HsFLAG-TIP49b_Ti_   | 2.395  | 0.2261 | 1279.39 | 1280.401 | 3628.8  | 1 | 372.8  | 63.6 | 1   | K.RMAEFGPDSGGR.V                                |
| *             | HsFLAG-TIP49b_Ti_   | 3.7583 | 0.2809 | 1280.09 | 1280.401 | 5308    | 1 | 1127.7 | 81.8 | 17  | K.RMAEFGPDSGGR.V                                |
| *             | HsVPS71-FLAG_Ti_    | 3.4753 | 0.2625 | 1124.39 | 1124.213 | 4487.1  | 1 | 1001.4 | 80   | 2   | R.MAEFGPDSGGR.V                                 |
| *             | HsMRGBP-FLAG_Ti     | 3.6431 | 0.2741 | 1586.87 | 1586.918 | 3643.9  | 1 | 334.7  | 60.7 | 8   | K.GVTIVKPIVYGNVAR.Y                             |
| *             | HsH2AZ-FLAG_293_    | 3.7206 | 0.2801 | 1587.32 | 1586.918 | 3826.5  | 1 | 633.2  | 71.4 | 22  | K.GVTIVKPIVYGNVAR.Y                             |
| *             | HsH2AZ-FLAG_293_    | 4.7684 | 0.338  | 1588.1  | 1586.918 | 7709    | 1 | 1984.9 | 53.6 | 7   | K.GVTIVKPIVYGNVAR.Y                             |
| *             | HsFlag-VPS71_Ti_10  | 1.8909 | 0.0918 | 988.6   | 989.162  | 5041.9  | 4 | 356.6  | 75   | 1   | K.PIVYGNVAR.Y                                   |
| *             | HsFlag-VPS71_Ti_10  | 3.6492 | 0.3001 | 1474.81 | 1473.643 | 5630.4  | 1 | 1170.6 | 81.8 | 8   | K.PYRNEDMSAYVK.K                                |
| *             | HsH2AZ-FLAG_293_    | 2.9207 | 0.26   | 1057.15 | 1057.163 | 3968.6  | 1 | 878.5  | 87.5 | 1   | R.NEDMSAYVK.K                                   |
| *             | HsYL1_Ti_101.1668.  | 2.451  | 0.1965 | 1057.49 | 1057.163 | 4098.5  | 1 | 374.8  | 68.8 | 5   | R.NEDMSAYVK.K                                   |
| *             | HsH2AZ-FLAG_293_    | 3.298  | 0.2583 | 1185.46 | 1186.313 | 5472.9  | 1 | 696.9  | 77.8 | 25  | K.LHESYGNPLR.V                                  |
| *             | HsH2AZ-FLAG_293_    | 3.2137 | 0.2536 | 1187.57 | 1186.313 | 5240    | 1 | 1376.5 | 94.4 | 12  | K.LHESYGNPLR.V                                  |
| *             | HsSrcap_Ti_206.288  | 3.5766 | 0.2333 | 2215.97 | 2216.631 | 7038.1  | 1 | 606    | 52.9 | 3   | K.IFFIDPNERPVTLYHLLK.L                          |
| *             | HsTIP60_Ti_103.179  | 2.6262 | 0.2985 | 1324.42 | 1325.522 | 8436.5  | 1 | 541.5  | 59.1 | 2   | K.LFQSDTNAMLGK.K                                |
| *             | HsH2AZ-FLAG_293_    | 4.0134 | 0.3246 | 1325.08 | 1325.522 | 6884.1  | 2 | 1177.9 | 77.3 | 7   | K.LFQSDTNAMLGK.K                                |
| *             | HsFlag-VPS71_Ti_10  | 4.1761 | 0.4683 | 3182.13 | 3183.633 | 5452.4  | 1 | 537.2  | 38.5 | 8   | K.TVVSEFYDEMIFQDPTAMMQLLTTSR.Q                  |

|               |                    |        |        |         |          |        |   |        |      |    |                                                                                                            |
|---------------|--------------------|--------|--------|---------|----------|--------|---|--------|------|----|------------------------------------------------------------------------------------------------------------|
| *             | HsMRGBP-FLAG_Ti    | 3.7863 | 0.2872 | 3184.83 | 3183.633 | 5747.2 | 1 | 629.2  | 28.8 | 2  | K.TVSEFYDEMIFQDPTAMMQLLTTSR.Q                                                                              |
| *             | HsFlag-VPS71_Ti_1C | 3.006  | 0.2119 | 1331.53 | 1332.453 | 4520   | 6 | 515.7  | 65   | 6  | K.HETEFAELEVK.T                                                                                            |
| *             | HsH2AZ-FLAG_293_   | 4.2289 | 0.3704 | 1332.25 | 1332.453 | 5064.7 | 1 | 1152.8 | 90   | 21 | K.HETEFAELEVK.T                                                                                            |
| *             | HsH2AZ-FLAG_293_   | 3.5353 | 0.1947 | 1166.48 | 1166.36  | 4611.8 | 1 | 1085.9 | 88.9 | 8  | K.KTSFEIAELK.E                                                                                             |
| *             | HsMRGBP-FLAG_Ti    | 2.4748 | 0.1455 | 1037.69 | 1038.186 | 6913.7 | 4 | 695    | 75   | 1  | K.TSFEIAELK.E                                                                                              |
| *             | HsTIP60_Ti_103.20C | 3.3179 | 0.2428 | 1037.92 | 1038.186 | 4225.9 | 1 | 935    | 93.8 | 7  | K.TSFEIAELK.E                                                                                              |
| *             | HsTIP60_Ti_106.229 | 3.269  | 0.2602 | 1323.39 | 1323.489 | 6003.2 | 1 | 862.6  | 75   | 3  | K.TSFEIAELKER.L                                                                                            |
| *             | HsYL1_Ti_103.0679. | 2.89   | 0.1785 | 1304.56 | 1304.397 | 5074.5 | 1 | 1220.5 | 90   | 1  | R.KLEEDDQAKDI.-                                                                                            |
| gi 11415030 r |                    | 13     | 93     | 61.20%  | 103      | 11367  |   |        |      |    | 11.4 H4 histone family, member E [Homo sapiens]                                                            |
| gi 89066445 r |                    | 13     | 93     | 61.20%  | 103      | 11367  |   |        |      |    | 11.4 PREDICTED: similar to germinal histone H4 gene isoform 4 [Homo sapiens]                               |
| gi 89066443 r |                    | 13     | 93     | 61.20%  | 103      | 11367  |   |        |      |    | 11.4 PREDICTED: similar to germinal histone H4 gene isoform 3 [Homo sapiens]                               |
| gi 89066441 r |                    | 13     | 93     | 61.20%  | 103      | 11367  |   |        |      |    | 11.4 PREDICTED: similar to germinal histone H4 gene isoform 2 [Homo sapiens]                               |
| gi 89066439 r |                    | 13     | 93     | 61.20%  | 103      | 11367  |   |        |      |    | 11.4 PREDICTED: similar to germinal histone H4 gene isoform 1 [Homo sapiens]                               |
| gi 4504323 re |                    | 13     | 93     | 61.20%  | 103      | 11367  |   |        |      |    | 11.4 histone 2, H4 [Homo sapiens]                                                                          |
| gi 4504321 re |                    | 13     | 93     | 61.20%  | 103      | 11367  |   |        |      |    | 11.4 H4 histone family, member M [Homo sapiens]                                                            |
| gi 4504317 re |                    | 13     | 93     | 61.20%  | 103      | 11367  |   |        |      |    | 11.4 H4 histone family, member K [Homo sapiens]                                                            |
| gi 4504315 re |                    | 13     | 93     | 61.20%  | 103      | 11367  |   |        |      |    | 11.4 H4 histone family, member J [Homo sapiens]                                                            |
| gi 4504313 re |                    | 13     | 93     | 61.20%  | 103      | 11367  |   |        |      |    | 11.4 H4 histone family, member I [Homo sapiens]                                                            |
| gi 4504311 re |                    | 13     | 93     | 61.20%  | 103      | 11367  |   |        |      |    | 11.4 H4 histone family, member H [Homo sapiens]                                                            |
| gi 4504309 re |                    | 13     | 93     | 61.20%  | 103      | 11367  |   |        |      |    | 11.4 H4 histone family, member G [Homo sapiens]                                                            |
| gi 4504307 re |                    | 13     | 93     | 61.20%  | 103      | 11367  |   |        |      |    | 11.4 H4 histone family, member D [Homo sapiens]                                                            |
| gi 4504305 re |                    | 13     | 93     | 61.20%  | 103      | 11367  |   |        |      |    | 11.4 H4 histone family, member C [Homo sapiens]                                                            |
| gi 4504303 re |                    | 13     | 93     | 61.20%  | 103      | 11367  |   |        |      |    | 11.4 H4 histone family, member B [Homo sapiens]                                                            |
| gi 4504301 re |                    | 13     | 93     | 61.20%  | 103      | 11367  |   |        |      |    | 11.4 H4 histone family, member A [Homo sapiens]                                                            |
| gi 28173560 r |                    | 13     | 93     | 61.20%  | 103      | 11367  |   |        |      |    | 11.4 histone H4 [Homo sapiens]                                                                             |
|               | HsFLAG-p53-DNA-D   | 3.0145 | 0.2922 | 1325.57 | 1326.539 | 3834   | 3 | 369.8  | 68.2 | 3  | R.DNIQGITKPAIR.R                                                                                           |
|               | HsFlag-NUFIP_Ti_2C | 4.0131 | 0.1701 | 1326.46 | 1326.539 | 8422.1 | 3 | 1090.6 | 72.7 | 18 | R.DNIQGITKPAIR.R                                                                                           |
|               | HsFLAG-ARP6_Ti_1   | 3.6067 | 0.2995 | 1337.36 | 1337.519 | 4896.1 | 1 | 1171.3 | 90   | 19 | K.RISGLIYEETR.G                                                                                            |
|               | HsFLAG-ARP8_Ti_2   | 3.4126 | 0.1563 | 1181.26 | 1181.331 | 5753.2 | 1 | 1221.9 | 94.4 | 2  | R.ISGLIYEETR.G                                                                                             |
|               | HsFLAG-ARP8_Ti_2   | 3.438  | 0.1052 | 990.08  | 990.191  | 3690.6 | 4 | 724.1  | 92.9 | 1  | K.VFLENVIR.D                                                                                               |
|               | HsFLAG-p53-DNA-D   | 3.1131 | 0.3479 | 1134.43 | 1135.219 | 4958.1 | 1 | 547    | 72.2 | 4  | R.DAVTYTEHAK.R                                                                                             |
|               | HsH2AZ-FLAG_293_   | 3.2692 | 0.2089 | 1135.49 | 1135.219 | 3844.6 | 2 | 765.2  | 88.9 | 9  | R.DAVTYTEHAK.R                                                                                             |
|               | HsFLAG-p53-DNA-D   | 2.8927 | 0.2581 | 1291.62 | 1291.406 | 7360.3 | 1 | 982.2  | 75   | 2  | R.DAVTYTEHAKR.K                                                                                            |
|               | HsFLAG-p53-DNA-D   | 4.0605 | 0.3019 | 1439.34 | 1439.753 | 7918.2 | 1 | 1802.1 | 83.3 | 3  | R.KTVTAMDVVYALK.R                                                                                          |
|               | HsFLAG-p53-DNA-D   | 2.218  | 0.2332 | 1310.57 | 1311.579 | 8668.9 | 7 | 452.4  | 54.5 | 1  | K.TVTAMDVVYALK.R                                                                                           |
|               | HsFLAG-ARP8_Ti_2   | 3.9675 | 0.3764 | 1311.12 | 1311.579 | 4993.7 | 1 | 1080.2 | 86.4 | 19 | K.TVTAMDVVYALK.R                                                                                           |
|               | HsFLAG-p53-DNA-D   | 3.5812 | 0.2851 | 1467.43 | 1467.767 | 9472.1 | 1 | 1549.8 | 75   | 9  | K.TVTAMDVVYALKR.Q                                                                                          |
|               | HsH2AZ-FLAG_293_   | 2.0919 | 0.0943 | 714.4   | 714.796  | 4050.5 | 1 | 414.5  | 75   | 3  | R.TLYGFGG.-                                                                                                |
| gi 14589951 r |                    | 11     | 223    | 61.00%  | 210      | 24611  |   |        |      |    | 6 PolII_Rpb5 {DNA directed RNA polymerase II polypeptide E; polymerase (RNA) II (DNA directed) polypeptide |
| *             | HsFLAG-UTX1_Ti_2C  | 2.6605 | 0.1319 | 1175.3  | 1174.326 | 5777.7 | 1 | 706.6  | 81.2 | 2  | K.TIMQLCHDR.G                                                                                              |
| *             | HsFlag-NUFIP_Ti_1C | 6.3309 | 0.4955 | 2028.84 | 2029.208 | 8545.4 | 1 | 2603.1 | 78.1 | 70 | R.GYLVTQDELDQTLEEFK.A                                                                                      |
| *             | HsFLAG-p53-DNA-D   | 4.63   | 0.3275 | 3456.79 | 3455.762 | 7924.9 | 1 | 765.6  | 25.9 | 4  | R.GYLVTQDELDQTLEEFKAQFGDKPSEGRPR.R                                                                         |
| *             | HsFLAG-BC014022_   | 2.8155 | 0.2105 | 1445.29 | 1445.578 | 6933.2 | 1 | 547.3  | 62.5 | 4  | K.AQFGDKPSEGRPR.R                                                                                          |

|              |                    |        |        |         |          |         |                                                             |        |      |    |                                  |
|--------------|--------------------|--------|--------|---------|----------|---------|-------------------------------------------------------------|--------|------|----|----------------------------------|
| *            | HsFlag-NUFIP_Ti_1C | 6.9793 | 0.4802 | 3162.37 | 3163.529 | 10303.9 | 1                                                           | 2838.6 | 40.4 | 80 | R.RDRLTVLVAHNDPTDQMFVFFPEEPK.V   |
| *            | HsFlag-NUFIP_Ti_1C | 3.5774 | 0.399  | 3163.06 | 3163.529 | 6979.7  | 1                                                           | 469.8  | 34.6 | 2  | R.RDRLTVLVAHNDPTDQMFVFFPEEPK.V   |
| *            | HsFLAG-p53-DNA-D   | 3.4875 | 0.3275 | 1442.64 | 1443.745 | 6369    | 1                                                           | 548.3  | 61.5 | 7  | R.ALIVVQQGMTPSAK.Q               |
| *            | HsFLAG-p53-DNA-D   | 4.5992 | 0.4515 | 1443.42 | 1443.745 | 7058.8  | 1                                                           | 1550.8 | 73.1 | 18 | R.ALIVVQQGMTPSAK.Q               |
| *            | HsFlag-NUFIP_Ti_11 | 7.2163 | 0.38   | 3509.22 | 3509.098 | 8045.6  | 1                                                           | 1411.7 | 33   | 9  | K.YILEQLLQELLINITEHELVEHVVMTEK.E |
| *            | HsFLAG-p53-DNA-D   | 2.6607 | 0.2128 | 1060.35 | 1060.192 | 7138.7  | 1                                                           | 1412.6 | 93.8 | 2  | K.EEVTELLAR.Y                    |
| *            | HsFLAG-p53-DNA-D   | 3.2621 | 0.1127 | 1100.54 | 1100.263 | 5708.4  | 3                                                           | 746    | 77.8 | 25 | K.IIRPSETAGR.Y                   |
| gij 13123776 | 43                 | 431    | 60.80% | 467     | 52993    | 9.5     | DNA methyltransferase 1-associated protein 1 [Homo sapiens] |        |      |    |                                  |
| *            | HsTIP60_Ti_103.011 | 5.9542 | 0.4978 | 1831.31 | 1830.987 | 5869.4  | 1                                                           | 1590.3 | 72.2 | 26 | R.DILELGGPEGDAASGTISK.K          |
| *            | HsH2AZ-FLAG_293_   | 5.0563 | 0.3958 | 1957.72 | 1959.161 | 5941.1  | 1                                                           | 1108.4 | 63.2 | 14 | R.DILELGGPEGDAASGTISKK.D         |
| *            | HsYL1_Ti_103.1338. | 2.3417 | 0.1813 | 1040.52 | 1041.189 | 4160.8  | 1                                                           | 448.6  | 68.8 | 1  | K.KSSETLTFK.R                    |
| *            | HsH2AZ-FLAG_293_   | 2.889  | 0.2756 | 913.51  | 913.015  | 3660    | 2                                                           | 704.9  | 92.9 | 2  | K.SSETLTFK.R                     |
| *            | HsH2AZ-FLAG_293_   | 3.2408 | 0.2388 | 1201.32 | 1201.362 | 5732.6  | 1                                                           | 988.8  | 88.9 | 2  | R.EVYALLYSDK.K                   |
| *            | HsFlag-VPS71_Ti_1C | 3.4131 | 0.2291 | 1201.57 | 1201.362 | 4529.5  | 1                                                           | 471.5  | 72.2 | 6  | R.EVYALLYSDK.K                   |
| *            | HsH2AZ-FLAG_293_   | 3.7437 | 0.2871 | 1329.3  | 1329.536 | 7700.7  | 1                                                           | 1688   | 90   | 14 | R.EVYALLYSDKK.D                  |
| *            | HsVPS71-FLAG_Ti_   | 3.496  | 0.2583 | 1329.84 | 1329.536 | 4618.7  | 1                                                           | 420.4  | 65   | 7  | R.EVYALLYSDKK.D                  |
| *            | HsFLAG-TIP49b_Ti_  | 4.2508 | 0.2536 | 1715.43 | 1715.903 | 4016.2  | 1                                                           | 716.5  | 66.7 | 16 | K.KDAPLLPSDTGQGYR.T              |
| *            | HsYL1-FLAG_Ti_202  | 2.668  | 0.1939 | 1587.8  | 1587.729 | 3159.1  | 7                                                           | 442.8  | 60.7 | 1  | K.DAPLLPSDTGQGYR.T               |
| *            | HsFLAG-TIP49b_Ti_  | 2.3451 | 0.2527 | 1166.38 | 1167.33  | 2819.9  | 6                                                           | 299.2  | 68.8 | 1  | K.DGAMFFHWR.R                    |
| *            | HsFLAG-TIP49b_Ti_  | 3.1737 | 0.3716 | 1167.31 | 1167.33  | 6958.9  | 1                                                           | 1508.8 | 93.8 | 9  | K.DGAMFFHWR.R                    |
| *            | HsH2AZ-FLAG_293_   | 3.8835 | 0.3638 | 1510.6  | 1510.649 | 4083.7  | 2                                                           | 766.4  | 79.2 | 3  | R.RAAEKGKDYPFAR.F                |
| *            | HsFlag-VPS71_Ti_1C | 2.3496 | 0.2597 | 1353.67 | 1354.462 | 3922.5  | 5                                                           | 252.6  | 50   | 2  | R.AAEKGKDYPFAR.F                 |
| *            | HsH2AZ-FLAG_293_   | 3.4599 | 0.4151 | 1354.38 | 1354.462 | 5072    | 1                                                           | 1045.2 | 81.8 | 8  | R.AAEKGKDYPFAR.F                 |
| *            | HsH2AZ-FLAG_293_   | 4.8987 | 0.4085 | 2813.4  | 2814.08  | 8388.7  | 1                                                           | 1239.4 | 47.7 | 30 | K.TVQVPVYSEQEYQLYLHDDAWTK.A      |
| *            | HsVPS71-FLAG_Ti_   | 2.8626 | 0.4052 | 1304.63 | 1304.402 | 3159.9  | 1                                                           | 343.3  | 65   | 10 | K.AETDHLFDLSR.R                  |
| *            | HsYL1_Ti_102.1739. | 4.0094 | 0.2213 | 1304.71 | 1304.402 | 6352.5  | 1                                                           | 1454.3 | 85   | 15 | K.AETDHLFDLSR.R                  |
| *            | HsFLAG-TIP49a_Ti_  | 2.5315 | 0.16   | 886.76  | 886.041  | 3832.1  | 1                                                           | 678.7  | 91.7 | 2  | R.FVVIHDR.Y                      |
| *            | HsMRGBP-FLAG_Ti_   | 4.0804 | 0.3622 | 1833.84 | 1833.059 | 4958    | 1                                                           | 736.2  | 69.2 | 10 | R.FVVIHDYDHQQFK.K                |
| *            | HsFLAG-TIP49b_Ti_  | 2.1464 | 0.2194 | 1239.55 | 1240.37  | 3210.5  | 5                                                           | 274.3  | 68.8 | 2  | K.ERYHICAK.L                     |
| *            | HsFLAG-TIP49b_Ti_  | 3.0693 | 0.3113 | 1240.22 | 1240.37  | 9310.1  | 1                                                           | 1321.4 | 87.5 | 6  | K.ERYHICAK.L                     |
| *            | HsH2AZ-FLAG_293_   | 2.018  | 0.1471 | 954.36  | 955.067  | 5061    | 9                                                           | 459.4  | 66.7 | 1  | R.YHICAK.L                       |
| *            | HsYL1_Ti_104.1311. | 2.5246 | 0.1943 | 956.47  | 955.067  | 3746.9  | 1                                                           | 535.3  | 91.7 | 3  | R.YHICAK.L                       |
| *            | HsMRGBP-FLAG_Ti_   | 2.5941 | 0.1575 | 1355.21 | 1354.592 | 4463    | 6                                                           | 571.9  | 62.5 | 1  | K.LANVRAVPGTDLK.I                |
| *            | HsFlag-VPS71_Ti_1C | 2.2028 | 0.158  | 1140.69 | 1141.272 | 5057.1  | 8                                                           | 419.5  | 61.1 | 2  | K.IPVFDAGHER.R                   |
| *            | HsH2AZ-FLAG_293_   | 2.8401 | 0.1706 | 1140.79 | 1141.272 | 5478.1  | 2                                                           | 829.1  | 83.3 | 12 | K.IPVFDAGHER.R                   |
| *            | HsH2AZ-FLAG_293_   | 5.7935 | 0.4452 | 2494.38 | 2494.764 | 9390.8  | 1                                                           | 1915.1 | 63.2 | 37 | R.LYNRTPEQVAEEEEYLLQELR.K        |
| *            | HsH2AZ-FLAG_293_   | 3.8307 | 0.1264 | 2494.47 | 2494.764 | 6381.8  | 2                                                           | 1050.4 | 36.8 | 1  | R.LYNRTPEQVAEEEEYLLQELR.K        |
| *            | HsFlag-VPS71_Ti_1C | 6.3195 | 0.3734 | 1947.77 | 1948.137 | 6528.7  | 1                                                           | 2179.3 | 83.3 | 47 | R.TPEQVAEEEEYLLQELR.K            |
| *            | HsH2AZ-FLAG_293_   | 4.3324 | 0.212  | 1947.79 | 1948.137 | 7929.3  | 1                                                           | 1920.7 | 50   | 6  | R.TPEQVAEEEEYLLQELR.K            |
| *            | HsH2AZ-FLAG_293_   | 3.0188 | 0.3483 | 1289.43 | 1290.416 | 4186.6  | 1                                                           | 418.8  | 68.2 | 7  | K.LITAADTTAEQR.R                 |
| *            | HsTIP60_Ti_102.138 | 4.6747 | 0.3276 | 1289.62 | 1290.416 | 9400.7  | 1                                                           | 2158.8 | 86.4 | 24 | K.LITAADTTAEQR.R                 |
| *            | HsTIP60_Ti_103.141 | 3.2023 | 0.2348 | 1440.21 | 1440.637 | 3240.3  | 3                                                           | 415.4  | 65.4 | 7  | K.EAEKPAVPETAGIK.F               |
| *            | HsFLAG-TIP49b_Ti_  | 2.1996 | 0.2979 | 982.44  | 983.153  | 4600.6  | 1                                                           | 452    | 66.7 | 5  | K.PAVPETAGIK.F                   |



|               |                     |        |        |         |          |         |                                                                 |        |      |    |                                            |
|---------------|---------------------|--------|--------|---------|----------|---------|-----------------------------------------------------------------|--------|------|----|--------------------------------------------|
| *             | HsFLAG-TIP49a_Ti_   | 2.9961 | 0.2087 | 1192.46 | 1193.426 | 7057.5  | 6                                                               | 566.6  | 61.1 | 13 | R.SDLVLLYELK.Q                             |
| *             | HsYL1_Ti_102.2384.  | 4.1433 | 0.1751 | 1193.78 | 1193.426 | 4547.6  | 3                                                               | 1037.4 | 83.3 | 33 | R.SDLVLLYELK.Q                             |
| *             | HsYL1_Ti_102.1788.  | 4.38   | 0.3015 | 1788.13 | 1786.93  | 7668.5  | 1                                                               | 976.6  | 65.4 | 5  | K.QACANCEYELQMLR.H                         |
| *             | HsFlag-VPS71_Ti_10  | 2.6543 | 0.1302 | 991.67  | 990.113  | 5997.2  | 1                                                               | 944.1  | 85.7 | 2  | R.HRHEALAR.A                               |
| *             | HsTIP60_Ti_106.233  | 4.9121 | 0.4223 | 2923.1  | 2924.237 | 6922.2  | 1                                                               | 657.5  | 35.9 | 19 | R.AGVLGGPATPASGPGPASAEPVTEPGLGDPDK.D       |
| *             | HsH2AZ-FLAG_293_    | 5.1334 | 0.2515 | 2925.54 | 2924.237 | 8403.6  | 1                                                               | 898.3  | 26.6 | 4  | R.AGVLGGPATPASGPGPASAEPVTEPGLGDPDK.D       |
| *             | HsMRGBP-FLAG_Ti_    | 5.4943 | 0.3311 | 4574.54 | 4574.101 | 5688.9  | 1                                                               | 441.7  | 18.2 | 10 | GAPLTPNSR.K                                |
| *             | HsH2AZ-FLAG_293_    | 4.069  | 0.2976 | 1669.72 | 1668.888 | 4980.6  | 1                                                               | 974.3  | 66.7 | 5  | K.DTIIDVVGAPLTPNSR.K                       |
| gi 5032027 re | 15                  | 69     | 60.70% | 425     | 47656    | 4.9     | retinoblastoma binding protein 4 [Homo sapiens]                 |        |      |    |                                            |
| *             | HsFlag-VPS71_Ti_10  | 5.1583 | 0.3722 | 3827.41 | 3828.377 | 9597.6  | 1                                                               | 1610.2 | 28.9 | 8  | K.NTPFLYDLVMTHALEWPSLTAQWLDPVTRPEGK.D      |
| *             | HsFLAG-Lin9_Ti_20   | 6.5992 | 0.4144 | 4097.55 | 4096.37  | 8584.8  | 1                                                               | 925    | 24.3 | 4  | R.LVLGHTSDEQNHLEVIASVQLPNDDAQFDASHYDSEK.G  |
| *             | HsFLAG-Lin9_Ti_20   | 2.2237 | 0.2484 | 1128.44 | 1129.214 | 6381    | 1                                                               | 554.5  | 63.6 | 2  | K.GEFGGFGSVSGK.I                           |
| *             | HsFLAG-Lin9_Ti_20   | 3.6625 | 0.2615 | 1129.2  | 1129.214 | 7271.5  | 1                                                               | 1515.5 | 81.8 | 2  | K.GEFGGFGSVSGK.I                           |
| *             | HsSrcap_Ti_203.235  | 3.002  | 0.3428 | 1472.37 | 1472.635 | 4836.8  | 1                                                               | 486.8  | 62.5 | 7  | K.TPSSDVLVFDYTK.H                          |
| *             | HsFLAG-Lin9_Ti_20   | 4.3366 | 0.3815 | 1473.5  | 1472.635 | 7851    | 1                                                               | 1516.2 | 75   | 9  | K.TPSSDVLVFDYTK.H                          |
| *             | HsFLAG-Lin9_Ti_20   | 2.7647 | 0.2874 | 1808.45 | 1806.896 | 6894.7  | 1                                                               | 438.3  | 50   | 1  | K.HPSKPDPSGECNPDLR.L                       |
| *             | HsSrcap_Ti_203.371  | 4.0791 | 0.2734 | 3756.03 | 3755.101 | 9077.9  | 2                                                               | 547.4  | 19.7 | 6  | K.EGYGLSWNPNSLGHLLSASDDHTICLWDISAVPK.E     |
| *             | HsFLAG-Lin9_Ti_20   | 5.8192 | 0.5307 | 3439.33 | 3440.794 | 9811.4  | 1                                                               | 1920.6 | 33.3 | 9  | K.TIFTGHTAVVEDVSWHLLHESLFGSVADDQK.L        |
| *             | HsFLAG-Lin9_Ti_20   | 5.925  | 0.2998 | 4099.24 | 4098.352 | 9916.8  | 1                                                               | 992.7  | 23   | 9  | R.SNNTSKPSHSVDAHTAEVNCLSFNPYSEFILATGSADK.T |
| *             | HsFLAG-Lin9_Ti_20   | 2.7344 | 0.0828 | 973.28  | 974.148  | 3249.6  | 3                                                               | 701.2  | 85.7 | 1  | K.TVALWDLR.N                               |
| *             | HsSrcap_Ti_205.221  | 2.7488 | 0.1048 | 1131.52 | 1131.32  | 4440.3  | 3                                                               | 625    | 81.2 | 1  | R.RLNVDLSK.I                               |
| *             | HsFLAG-Lin9_Ti_20   | 2.8604 | 0.1205 | 975.25  | 975.133  | 4581    | 5                                                               | 882.6  | 92.9 | 1  | R.LNVWDLK.I                                |
| *             | HsFLAG-Lin9_Ti_20   | 3.745  | 0.3865 | 2874.48 | 2875.078 | 4534.9  | 1                                                               | 341.7  | 36.5 | 3  | K.IGEEQSPEDAEDGPPPELLFIHGHTAK.I            |
| *             | HsFLAG-Lin9_Ti_20   | 4.7938 | 0.2719 | 2875.13 | 2875.078 | 5244.8  | 2                                                               | 644.4  | 30.8 | 6  | K.IGEEQSPEDAEDGPPPELLFIHGHTAK.I            |
| gi 23346420 r | 76                  | 402    | 60.40% | 1324    | 141860   | 9       | nuclear factor related to kappaB binding protein [Homo sapiens] |        |      |    |                                            |
| *             | HsFlag-FLJ90652_2   | 4.0767 | 0.1647 | 1264.71 | 1265.433 | 6995.3  | 5                                                               | 1399.9 | 85   | 1  | R.IMEDCLLGTR.V                             |
| *             | HsFLAG-FLJ20309_    | 6.8053 | 0.4374 | 3694.42 | 3695.071 | 9882.7  | 1                                                               | 1747.2 | 30.6 | 14 | R.VSLPEDLLEDPEIFFDVVSLSTWQEVLSDSQR.E       |
| *             | HsFLAG-TCF3_Ti_10   | 5.6199 | 0.5147 | 3775.07 | 3777.141 | 10044.3 | 1                                                               | 1066.1 | 25   | 29 | R.EHLQQFLPQFPEDSAEQQNELILALFSGENFR.F       |
| *             | Hs293Flag-les2_Ti_1 | 3.386  | 0.2737 | 1125.05 | 1125.316 | 4661.2  | 1                                                               | 952.3  | 83.3 | 11 | R.FGNPLHIAQK.L                             |
| *             | HsFLAG-FLJ20309_    | 2.8138 | 0.091  | 1125.57 | 1125.316 | 5956.6  | 1                                                               | 814.7  | 72.2 | 3  | R.FGNPLHIAQK.L                             |
| *             | HsFLAG-TCF3_Ti_10   | 2.7406 | 0.1394 | 1141.46 | 1142.257 | 6458.1  | 7                                                               | 788.7  | 66.7 | 1  | R.DGHFNPEVVK.Y                             |
| *             | HsFLAG-TCF3_Ti_10   | 3.6441 | 0.2373 | 1640.08 | 1640.801 | 7208.4  | 1                                                               | 629.2  | 63.6 | 4  | K.RYLNSQQQYFHR.L                           |
| *             | HsFLAG-TCF3_Ti_10   | 4.1275 | 0.2862 | 1486.52 | 1484.614 | 9117.3  | 1                                                               | 1798.4 | 85   | 17 | R.YLNSQQQYFHR.L                            |
| *             | HsFlag-FLJ90652_2   | 2.9851 | 0.1978 | 935.17  | 935.083  | 5384.4  | 1                                                               | 1043   | 92.9 | 1  | R.SDLLEMAR.R                               |
| *             | HsFLAG-TCF3_Ti_10   | 3.1806 | 0.2516 | 1001.51 | 1001.176 | 5725.2  | 3                                                               | 647    | 81.2 | 8  | R.RSGPALPFR.Q                              |
| *             | HsFLAG-FLJ20309_    | 2.2748 | 0.0993 | 844.45  | 844.989  | 5311.1  | 1                                                               | 442.7  | 78.6 | 1  | R.SGPALPFR.Q                               |
| *             | HsFLAG-TCF3_Ti_10   | 1.9236 | 0.1104 | 923.61  | 924.088  | 4212    | 9                                                               | 246.5  | 62.5 | 1  | R.SPSPAVPLR.V                              |
| *             | HsFLAG-TCF3_Ti_10   | 2.3183 | 0.2465 | 1191.53 | 1192.413 | 4864.9  | 1                                                               | 382.1  | 65   | 2  | R.VVPTLSTTDMK.T                            |
| *             | HsFLAG-ARP5_Ti_1    | 3.8193 | 0.2653 | 1391.29 | 1391.518 | 7807.9  | 2                                                               | 1328.4 | 70.8 | 4  | K.TADKVELGSDSLK.I                          |
| *             | HsFlag-FLJ90652_2   | 2.2276 | 0.1694 | 975.42  | 976.072  | 5559.6  | 1                                                               | 648.1  | 75   | 1  | K.VELGSDSLK.I                              |
| *             | HsFLAG-TIP49a_Ti_   | 5.9145 | 0.4697 | 2403.06 | 2403.672 | 8149.5  | 1                                                               | 2200.2 | 46.2 | 4  | K.HQPDHPDLLTGDLTLNDIMTR.V                  |
| *             | HsFLAG-TIP49a_Ti_   | 4.0448 | 0.2484 | 2403.9  | 2403.672 | 7395.7  | 2                                                               | 596.9  | 42.5 | 4  | K.HQPDHPDLLTGDLTLNDIMTR.V                  |
| *             | HsFLAG-ARP8_Ti_2    | 4.7903 | 0.3465 | 1462.26 | 1462.773 | 9937.7  | 1                                                               | 2380.3 | 80.8 | 5  | R.KGSLAALYDLAVLK.K                         |

|   |                     |        |        |         |          |        |   |        |      |    |                                        |
|---|---------------------|--------|--------|---------|----------|--------|---|--------|------|----|----------------------------------------|
| * | HsFLAG-ARP8_Ti_2    | 2.3015 | 0.2026 | 1334.31 | 1334.599 | 9294.5 | 1 | 790    | 58.3 | 1  | K.GSLAALYDLAVLK.K                      |
| * | HsFLAG-FLJ20309_    | 5.0626 | 0.4236 | 1334.52 | 1334.599 | 6129.9 | 1 | 1751.8 | 83.3 | 16 | K.GSLAALYDLAVLK.K                      |
| * | HsFLAG-TCF3_Ti_10   | 3.4558 | 0.2421 | 1463.81 | 1462.773 | 7999.8 | 1 | 1312.9 | 69.2 | 1  | K.GSLAALYDLAVLKK.K                     |
| * | HsFLAG-FLJ20309_    | 2.9485 | 0.2549 | 1441.94 | 1442.654 | 2556.4 | 1 | 258.2  | 66.7 | 1  | R.AVPSSFSPFVEFK.E                      |
| * | HsFLAG-TCF3_Ti_10   | 3.3353 | 0.3651 | 1699.51 | 1699.944 | 3771.6 | 1 | 539.7  | 71.4 | 3  | R.AVPSSFSPFVEFKEK.T                    |
| * | HsFLAG-TCF3_Ti_10   | 2.9901 | 0.1981 | 1132.33 | 1132.216 | 4467.8 | 1 | 752.2  | 88.9 | 2  | K.LLGQSQDNEK.E                         |
| * | HsFLAG-ARP5_Ti_10   | 4.1099 | 0.295  | 2675.84 | 2676.042 | 9170.8 | 1 | 967    | 28.4 | 2  | K.LLGQSQDNEKELAALFQLWLETK.D            |
| * | HsFLAG-FLJ20309_    | 5.3395 | 0.425  | 1562.48 | 1562.849 | 7260.8 | 1 | 1935.8 | 87.5 | 19 | K.ELAALFQLWLETK.D                      |
| * | Hs293Flag-les2_Ti_1 | 4.207  | 0.3548 | 2397.08 | 2396.452 | 9460.7 | 1 | 1243.2 | 52.5 | 1  | K.DQAFCKQENEDSSDATTVPVR.V              |
| * | HsFLAG-FLJ20309_    | 4.739  | 0.3872 | 1646.08 | 1646.665 | 8664.5 | 1 | 1281.1 | 67.9 | 4  | K.QENEDSSDATTVPVR.V                    |
| * | HsFLAG-TIP49b_Ti_   | 2.9361 | 0.0954 | 1736.51 | 1736.922 | 4672.8 | 8 | 334.2  | 50   | 1  | R.VRTDYVVRPSTGEEK.R                    |
| * | HsFLAG-FLJ20309_    | 3.6862 | 0.268  | 1481.61 | 1481.602 | 7617.9 | 1 | 1229.1 | 75   | 4  | R.TDYVVRPSTGEEK.R                      |
| * | HsFLAG-TCF3_Ti_10   | 3.2044 | 0.0819 | 1092.04 | 1092.2   | 6738.8 | 2 | 1117.6 | 92.9 | 2  | K.RVFQEQUER.Y                          |
| * | HsFLAG-TIP49a_Ti_   | 3.2777 | 0.3628 | 1286.34 | 1287.519 | 5657.1 | 1 | 937.4  | 72.7 | 12 | R.MHGFEVVGVPVK.G                       |
| * | HsFLAG-ARP5_Ti_10   | 3.9031 | 0.408  | 1287.35 | 1287.519 | 4512.6 | 1 | 753.9  | 77.3 | 10 | R.MHGFEVVGVPVK.G                       |
| * | HsFLAG-ARP5_Ti_10   | 4.2565 | 0.3668 | 1590.5  | 1590.863 | 5629.2 | 1 | 1027.4 | 73.1 | 18 | R.SDRPAYVTILSLVR.D                     |
| * | HsFLAG-FLJ20309_    | 5.8306 | 0.451  | 2521.86 | 2521.744 | 5903.2 | 1 | 1200.7 | 58.7 | 23 | K.DSQFLAPDVTSTQVNTVVSALDR.L            |
| * | HsFLAG-TCF3_Ti_10   | 3.575  | 0.2496 | 3193.3  | 3192.51  | 2890.7 | 4 | 199.9  | 24.1 | 1  | K.DSQFLAPDVTSTQVNTVVSALDR.LHYEK.D      |
| * | HsFLAG-ARP5_Ti_10   | 2.7675 | 0.1791 | 1289.34 | 1289.44  | 5111.2 | 1 | 804.5  | 77.8 | 2  | R.LHYEKDPCVK.Y                         |
| * | HsFlag-FLJ90652_29  | 2.6819 | 0.126  | 1001.1  | 1001.219 | 4207.5 | 5 | 673.9  | 91.7 | 1  | K.LWIYLHR.D                            |
| * | HsFLAG-ARP5_Ti_10   | 3.1866 | 0.1979 | 1197.04 | 1197.203 | 5626   | 1 | 784.5  | 87.5 | 6  | R.DRSEEEFER.I                          |
| * | HsFLAG-FLJ20309_    | 2.6847 | 0.269  | 1009.84 | 1009.153 | 4981.4 | 1 | 596.5  | 72.2 | 5  | R.IHQAAAAAK.A                          |
| * | HsFLAG-FLJ20309_    | 2.8936 | 0.1239 | 1221.68 | 1222.473 | 5823.9 | 1 | 675    | 70   | 1  | K.ALQKPKPPSK.V                         |
| * | HsFLAG-FLJ20309_    | 3.299  | 0.1144 | 1222.5  | 1222.473 | 5390.6 | 2 | 601.6  | 70   | 4  | K.ALQKPKPPSK.V                         |
| * | HsFLAG-ARP8_Ti_2    | 3.8392 | 0.2087 | 3516.06 | 3513.963 | 6214.2 | 1 | 747.6  | 25   | 1  | K.SSSGVLVSSPTMPHLGTMSPASSQTAPSSQAAAR.V |
| * | HsFLAG-FLJ20309_    | 3.8081 | 0.4099 | 1383.6  | 1384.535 | 5257.3 | 1 | 580.1  | 65.4 | 16 | R.VVSHSGSAGLSQVR.V                     |
| * | HsFLAG-TCF3_Ti_10   | 4.0602 | 0.4457 | 1384.86 | 1384.535 | 6715.3 | 1 | 1542.2 | 80.8 | 25 | R.VVSHSGSAGLSQVR.V                     |
| * | HsFlag-FLJ90652_29  | 3.8598 | 0.4232 | 3122.25 | 3122.613 | 6764.9 | 1 | 678.9  | 38.3 | 3  | R.VVAQPSLPAVPQQSGGPAQTLQMPAGPQIR.V     |
| * | HsFLAG-FLJ20309_    | 3.2803 | 0.3867 | 1368.82 | 1369.706 | 3548.5 | 1 | 485.5  | 70.8 | 2  | K.VVPQTVMATVPVK.A                      |
| * | HsFLAG-TCF3_Ti_10   | 3.6667 | 0.4434 | 3094.13 | 3095.48  | 8020.5 | 1 | 373    | 27.4 | 1  | K.AQTAAATVQRPGPGQTGLTVTSLPATASPVSK.P   |
| * | HsFLAG-FLJ20309_    | 5.5008 | 0.436  | 3096.31 | 3095.48  | 7117.1 | 1 | 757.3  | 25.8 | 3  | K.AQTAAATVQRPGPGQTGLTVTSLPATASPVSK.P   |
| * | HsFLAG-FLJ20309_    | 2.5443 | 0.1046 | 2064.53 | 2067.347 | 7117.1 | 2 | 303.2  | 35.7 | 1  | R.PGPGQTGLTVTSLPATASPVSK.P             |
| * | HsFlag-FLJ90652_29  | 4.6744 | 0.3726 | 2770.67 | 2770.069 | 7754.7 | 1 | 871.2  | 41.1 | 2  | K.PATSSPGTSAPSASTAAVIQNVGTGQNIK.Q      |
| * | HsFLAG-TCF3_Ti_10   | 3.2625 | 0.2512 | 2712.2  | 2713.109 | 4961.8 | 1 | 233.8  | 32   | 4  | K.QVAITGQLGVKPKQTGNSIPLTATNFR.I        |
| * | Hs293Flag-les2_Ti_1 | 4.7991 | 0.3806 | 2714.44 | 2713.109 | 6676.8 | 1 | 1422.9 | 36   | 4  | K.QVAITGQLGVKPKQTGNSIPLTATNFR.I        |
| * | HsFlag-FLJ90652_29  | 4.4432 | 0.4358 | 1617.48 | 1617.802 | 4725.6 | 1 | 810.5  | 75   | 2  | K.PQTGNSIPLTATNFR.I                    |
| * | HsFLAG-TCF3_Ti_10   | 2.848  | 0.2635 | 1129.38 | 1130.283 | 5895.9 | 1 | 597.7  | 65   | 2  | R.LPPSSITDAK.G                         |
| * | HsFLAG-FLJ20309_    | 4.1198 | 0.3536 | 1510.22 | 1510.644 | 6209.6 | 1 | 1128.7 | 71.4 | 2  | K.LTQDLFGTGGNTTGK.G                    |
| * | HsFlag-FLJ90652_29  | 4.7835 | 0.3756 | 2073.68 | 2074.301 | 8836.1 | 1 | 1443.4 | 55   | 5  | K.GISATLHVTSNPVHAADSPAK.A              |
| * | HsFLAG-TCF3_Ti_10   | 3.2945 | 0.2744 | 1648.99 | 1649.795 | 3648.7 | 3 | 404.6  | 52.9 | 4  | K.ASSASAPSTPTGTTVVK.V                  |
| * | HsFlag-FLJ90652_29  | 3.3033 | 0.3318 | 1329.29 | 1329.598 | 5056   | 1 | 915.2  | 79.2 | 1  | R.LMPALGVSVADQK.G                      |
| * | HsYL1_Ti_103.1226.  | 3.9083 | 0.3419 | 1489.95 | 1489.669 | 4402.4 | 1 | 845.6  | 71.4 | 9  | K.STVASSEAKPAATIR.I                    |
| * | HsFlag-FLJ90652_29  | 3.1621 | 0.3546 | 1197.78 | 1198.365 | 4551.9 | 1 | 562.3  | 72.7 | 5  | K.AGQTTIVATHAK.Q                       |

|             |                     |        |        |         |          |         |                                                         |        |      |     |                                    |
|-------------|---------------------|--------|--------|---------|----------|---------|---------------------------------------------------------|--------|------|-----|------------------------------------|
| *           | HsFLAG-ARP5_Ti_1    | 3.6193 | 0.2441 | 1198.3  | 1198.365 | 5704.6  | 1                                                       | 1187.7 | 81.8 | 14  | K.AGQTITVATHAK.Q                   |
| *           | HsYL1-FLAG_Ti_202   | 3.7159 | 0.3495 | 2115.65 | 2115.392 | 6352.2  | 1                                                       | 733.3  | 50   | 2   | K.TVAVASGAASTPISISTGAPTVR.Q        |
| *           | HsFLAG-FLJ20309_    | 2.4678 | 0.3314 | 1588.62 | 1589.786 | 2325.7  | 3                                                       | 95     | 43.3 | 1   | R.QVPVSTTVVSTSQAGK.L               |
| *           | HsYL1_Ti_104.1552.  | 4.3386 | 0.3852 | 2056.91 | 2057.355 | 5204.9  | 1                                                       | 682.5  | 57.9 | 2   | R.QVPVSTTVVSTSQAGKLPTR.I           |
| *           | HsYL1_Ti_103.2124.  | 2.1539 | 0.2615 | 1412.64 | 1413.759 | 7396.2  | 1                                                       | 600.1  | 58.3 | 1   | R.ITVPLSVISQPMK.G                  |
| *           | HsFLAG-FLJ20309_    | 3.4614 | 0.3053 | 1413.64 | 1413.759 | 4437.6  | 1                                                       | 677.5  | 75   | 2   | R.ITVPLSVISQPMK.G                  |
| *           | HsFLAG-ARP5_Ti_1    | 2.8462 | 0.2744 | 1128.25 | 1129.261 | 5623    | 8                                                       | 523.7  | 68.2 | 1   | K.GNLGANLSGLGR.N                   |
| *           | HsFLAG-TCF3_Ti_10   | 2.7528 | 0.1957 | 1259.59 | 1260.535 | 6230.3  | 1                                                       | 558.7  | 63.6 | 2   | R.NIILTTPAGTK.L                    |
| *           | HsFlag-FLJ90652_2   | 2.5695 | 0.1281 | 1260.57 | 1260.535 | 9011.4  | 5                                                       | 1007.6 | 63.6 | 1   | R.NIILTTPAGTK.L                    |
| *           | HsFLAG-TCF3_Ti_10   | 4.9774 | 0.3688 | 3194.21 | 3195.649 | 8829.5  | 1                                                       | 1053.9 | 39.3 | 4   | K.LIAGNKPVSFLLTAQQLQQLQQQGQATQVR.I |
| *           | HsFLAG-TCF3_Ti_10   | 6.0555 | 0.3485 | 3196.9  | 3195.649 | 11147.7 | 1                                                       | 2302.5 | 33   | 3   | K.LIAGNKPVSFLLTAQQLQQLQQQGQATQVR.I |
| *           | HsFLAG-TCF3_Ti_10   | 6.0368 | 0.3475 | 2597.76 | 2598.922 | 11385.9 | 1                                                       | 1881.5 | 52.3 | 7   | K.PVSFLLTAQQLQQLQQQGQATQVR.I       |
| *           | HsFLAG-TCF3_Ti_10   | 4.3994 | 0.4919 | 1897.81 | 1898.083 | 4312.8  | 1                                                       | 630.9  | 58.3 | 14  | R.IQTVPASHLQQGTASGSSK.A            |
| *           | HsFLAG-FLJ20309_    | 2.2419 | 0.3433 | 1356.63 | 1357.59  | 8111.6  | 4                                                       | 327.8  | 46.2 | 1   | K.AVSTVVVTTAPSPK.Q                 |
| *           | HsFLAG-FLJ20309_    | 4.4655 | 0.289  | 1357.39 | 1357.59  | 6599.5  | 1                                                       | 1301.7 | 73.1 | 4   | K.AVSTVVVTTAPSPK.Q                 |
| gi 18079254 | r                   | 13     | 314    | 60.20%  | 133      | 15511   | 6 p53 and DNA damage-regulated protein [Homo sapiens]   |        |      |     |                                    |
| *           | HsFlag-NUFIP_Ti_10  | 6.6793 | 0.4116 | 1849.67 | 1850.073 | 8362.1  | 1                                                       | 3512.2 | 86.7 | 197 | R.YLVEVEELAEVVLADK.R               |
| *           | HsFLAG-RPB5MP_2     | 4.9731 | 0.2275 | 1851.02 | 1850.073 | 9598.3  | 1                                                       | 1981   | 48.3 | 1   | R.YLVEVEELAEVVLADK.R               |
| *           | HsFLAG-p53-DNA-D    | 5.9224 | 0.4017 | 2005.11 | 2006.26  | 8312.3  | 1                                                       | 2925.9 | 81.2 | 14  | R.YLVEVEELAEVVLADK.R               |
| *           | HsFLAG-RPB5MP_2     | 4.4327 | 0.3064 | 2007.21 | 2006.26  | 3188.7  | 1                                                       | 779.5  | 48.4 | 4   | R.YLVEVEELAEVVLADK.R               |
| *           | HsFLAG-p53-DNA-D    | 3.2924 | 0.1475 | 1088.24 | 1088.249 | 3469.3  | 3                                                       | 710.5  | 93.8 | 5   | K.RQIVDLDTK.R                      |
| *           | HsFLAG-p53-DNA-D    | 3.3887 | 0.1972 | 1244.66 | 1244.437 | 5175.9  | 1                                                       | 948    | 83.3 | 2   | K.RQIVDLDTK.R                      |
| *           | HsFLAG-p53-DNA-D    | 5.4343 | 0.4676 | 2106.85 | 2106.423 | 6462.3  | 1                                                       | 1219.6 | 61.8 | 16  | K.DLSLSEDMVCFGNMFIK.M              |
| *           | HsFLAG-p53-DNA-D    | 3.035  | 0.2726 | 1500.53 | 1501.651 | 3907.2  | 1                                                       | 349.5  | 59.1 | 2   | K.EMIEKQDHLDK.E                    |
| *           | HsFLAG-p53-DNA-D    | 3.543  | 0.1137 | 1501.48 | 1501.651 | 10315.4 | 3                                                       | 1192   | 72.7 | 2   | K.EMIEKQDHLDK.E                    |
| *           | HsFLAG-p53-DNA-D    | 3.445  | 0.1257 | 1259.67 | 1260.476 | 6728.1  | 2                                                       | 968.6  | 75   | 11  | R.LFEAQGKPELK.G                    |
| *           | HsFlag-NUFIP_Ti_10  | 3.8902 | 0.1457 | 1260.3  | 1260.476 | 6368.9  | 1                                                       | 1618.9 | 85   | 41  | R.LFEAQGKPELK.G                    |
| *           | HsFLAG-p53-DNA-D    | 3.5101 | 0.2803 | 1501.66 | 1502.667 | 7512.8  | 1                                                       | 536.9  | 54.2 | 1   | K.GFNLNPLNQDELK.A                  |
| *           | HsFLAG-p53-DNA-D    | 4.2756 | 0.2277 | 1502.63 | 1502.667 | 4021.3  | 1                                                       | 913.7  | 83.3 | 18  | K.GFNLNPLNQDELK.A                  |
| gi 5729877  | re                  | 43     | 647    | 60.10%  | 646      | 70898   | 5.5 heat shock 70kDa protein 8 isoform 1 [Homo sapiens] |        |      |     |                                    |
|             | HsFlag-FLJ90652_2   | 6.1368 | 0.2388 | 2264.47 | 2264.509 | 7961.4  | 1                                                       | 1281.9 | 57.1 | 25  | K.GPAVGIDLGTTYSCVGVFQHGK.V         |
|             | HsFLAG-ARP6_Ti_1    | 4.8475 | 0.294  | 2266.77 | 2264.509 | 3889.5  | 1                                                       | 746.3  | 36.9 | 13  | K.GPAVGIDLGTTYSCVGVFQHGK.V         |
|             | HsFlag-FLJ90652_2   | 3.6517 | 0.3726 | 1487.89 | 1488.594 | 3812.9  | 1                                                       | 610.4  | 75   | 34  | R.TTPSYVAFTDTER.L                  |
|             | Hs293Flag-les2_Ti_1 | 3.2174 | 0.4318 | 1488.58 | 1488.594 | 3710.2  | 1                                                       | 167.1  | 54.2 | 6   | R.TTPSYVAFTDTER.L                  |
|             | HsFLAG-ARP6_Ti_1    | 5.2019 | 0.4065 | 1650.56 | 1650.847 | 5678.5  | 1                                                       | 1596.9 | 82.1 | 13  | K.NQVAMNPTNTVFDK.R                 |
|             | HsFlag-FLJ90652_2   | 4.0513 | 0.3251 | 1411.44 | 1411.573 | 5518.4  | 1                                                       | 1586.9 | 90.9 | 14  | R.RFDDAVVQSDMK.H                   |
|             | HsFLAG-p53-DNA-D    | 3.3929 | 0.3724 | 1654.52 | 1654.93  | 4523.5  | 1                                                       | 590    | 65.4 | 15  | K.HWPFMVDNAGRPK.V                  |
|             | HsFlag-NUFIP_Ti_11  | 4.4408 | 0.3172 | 1655.16 | 1654.93  | 5908.1  | 1                                                       | 1389.3 | 53.8 | 8   | K.HWPFMVDNAGRPK.V                  |
|             | HsYL1_Ti_103.1140.  | 2.546  | 0.195  | 1180.57 | 1181.331 | 4585.1  | 2                                                       | 464.2  | 66.7 | 2   | K.VQVEYKGETK.S                     |
|             | HsFLAG-ARP6_Ti_1    | 3.2097 | 0.268  | 1181.78 | 1181.331 | 4772.1  | 4                                                       | 814.9  | 83.3 | 12  | K.VQVEYKGETK.S                     |
|             | HsFlag-ZnF-HIT2_Ti  | 3.7928 | 0.387  | 1617.93 | 1617.854 | 4953.5  | 1                                                       | 1057.1 | 80.8 | 6   | K.SFYPEEVSSMVLTK.M                 |
|             | HsFLAG-TCF3_Ti_10   | 2.6624 | 0.1335 | 994.58  | 994.133  | 3857.7  | 1                                                       | 319.8  | 68.8 | 4   | K.EIAEAYLGK.T                      |
|             | HsFlag-FLJ90652_2   | 4.3129 | 0.3232 | 1982.21 | 1983.188 | 8554.8  | 1                                                       | 1356   | 44.1 | 3   | K.TVTNAVVTVPAYFNDSQR.Q             |

|               |                    |        |        |         |          |                                                                   |   |        |      |     |                                    |
|---------------|--------------------|--------|--------|---------|----------|-------------------------------------------------------------------|---|--------|------|-----|------------------------------------|
|               | HsFlag-VPS71_Ti_10 | 3.8212 | 0.2319 | 1983.81 | 1983.188 | 4124.5                                                            | 4 | 391    | 52.9 | 12  | K.TVTNAVVTVPAYFNDSQR.Q             |
|               | HsFLAG-Lin9_Ti_20  | 5.2508 | 0.4465 | 1660.49 | 1660.908 | 5331.5                                                            | 1 | 1768.4 | 80   | 50  | R.IINEPTAAAIAAYGLDK.K              |
|               | HsFLAG-ARP5_Ti_1   | 3.8699 | 0.1778 | 1788.62 | 1789.082 | 4190.7                                                            | 1 | 571.2  | 59.4 | 2   | R.IINEPTAAAIAAYGLDK.V              |
|               | HsFLAG-TCF3_Ti_10  | 2.6522 | 0.2646 | 1235.34 | 1236.474 | 6278.3                                                            | 1 | 602.7  | 66.7 | 8   | R.MVNHFAIEFK.R                     |
|               | HsFLAG-TCF3_Ti_10  | 3.9739 | 0.3248 | 1237.36 | 1236.474 | 8017.1                                                            | 1 | 1623.2 | 88.9 | 27  | R.MVNHFAIEFK.R                     |
|               | HsFlag-NUFIP_Ti_10 | 2.6943 | 0.3096 | 2999.39 | 2999.255 | 8382.7                                                            | 1 | 292.9  | 25   | 1   | R.TLSSTQASIEIDSLYEGIDFYTSITR.A     |
|               | HsFlag-FLJ90652_2  | 2.0904 | 0.2727 | 1480.7  | 1481.651 | 2330.8                                                            | 4 | 142.3  | 59.1 | 1   | R.ARFEELNADLFR.G                   |
|               | HsFLAG-ARP6_Ti_1   | 4.2068 | 0.2215 | 1481.81 | 1481.651 | 6808.7                                                            | 1 | 1830.4 | 59.1 | 3   | R.ARFEELNADLFR.G                   |
|               | HsYL1_Ti_103.1942  | 4.6423 | 0.2622 | 1483.93 | 1481.651 | 4875.6                                                            | 1 | 1115   | 86.4 | 58  | R.ARFEELNADLFR.G                   |
|               | HsFlag-FLJ90652_2  | 3.6003 | 0.2919 | 1254.46 | 1254.385 | 7777.4                                                            | 2 | 1585.6 | 88.9 | 3   | R.FEELNADLFR.G                     |
|               | HsFLAG-ARP5_Ti_1   | 4.479  | 0.2769 | 1838.53 | 1839.102 | 7962.7                                                            | 1 | 1490.9 | 62.5 | 6   | K.LDKSQIHDIVLVGGSTR.I              |
|               | HsFLAG-ARP6_Ti_1   | 4.2922 | 0.4754 | 1481.45 | 1482.68  | 4719.5                                                            | 1 | 870.9  | 69.2 | 10  | K.SQIHDIVLVGGSTR.I                 |
|               | HsFLAG-Lin9_Ti_20  | 5.0441 | 0.3533 | 1483.74 | 1482.68  | 8431.4                                                            | 1 | 2557.7 | 84.6 | 72  | K.SQIHDIVLVGGSTR.I                 |
|               | HsTIP60_Ti_105.226 | 2.8115 | 0.2224 | 1082.24 | 1082.244 | 4474.4                                                            | 5 | 672.9  | 87.5 | 2   | K.LLQDFFNKG.E                      |
|               | HsFLAG-FLJ20729_   | 6.6243 | 0.4729 | 2260.41 | 2261.494 | 10653                                                             | 1 | 2432.9 | 39.8 | 26  | K.SINPDEAVAYGAAVQAAILSGDK.S        |
|               | HsFlag-NUFIP_Ti_10 | 6.472  | 0.4678 | 2261.89 | 2261.494 | 8798.4                                                            | 1 | 1804.1 | 56.8 | 148 | K.SINPDEAVAYGAAVQAAILSGDK.S        |
|               | HsFlag-FLJ90652_2  | 6.0047 | 0.467  | 3242.05 | 3240.821 | 10030                                                             | 1 | 1685   | 30.8 | 3   | K.SENVQDLLLDVTPLSLGIETAGGVMVTLIK.R |
|               | HsFlag-FLJ90652_2  | 2.5343 | 0.1365 | 931.17  | 931.08   | 5013.8                                                            | 4 | 875.8  | 100  | 1   | K.RNTTIPTK.Q                       |
|               | HsFLAG-ARP6_Ti_1   | 4.7632 | 0.3753 | 2775.1  | 2775.989 | 5899.5                                                            | 1 | 578    | 43.5 | 4   | K.QTQFTTYSNDQPGVLIQVYGER.A         |
| *             | HsFlag-NUFIP_Ti_11 | 2.9131 | 0.178  | 2515.83 | 2515.823 | 8219.3                                                            | 1 | 560.9  | 34.8 | 1   | R.GVPQIEVTFDIDANGILNVSAVDK.S       |
| *             | HsFLAG-ARP6_Ti_1   | 2.0968 | 0.1104 | 989.31  | 990.101  | 3569.2                                                            | 7 | 337.3  | 78.6 | 1   | R.LSKEDIER.M                       |
| *             | HsYL1_Ti_103.1207  | 2.8106 | 0.1017 | 990.54  | 990.101  | 4889.7                                                            | 1 | 753.6  | 92.9 | 2   | R.LSKEDIER.M                       |
| *             | HsFLAG-ARP5_Ti_1   | 4.5401 | 0.2682 | 1982.14 | 1983.204 | 6226.5                                                            | 1 | 1085.3 | 46.7 | 3   | R.MVQEAKEYKADEKQR.D                |
| *             | HsFLAG-ARP5_Ti_1   | 4.0934 | 0.3341 | 1982.65 | 1983.204 | 7790.9                                                            | 1 | 1091   | 56.7 | 1   | R.MVQEAKEYKADEKQR.D                |
| *             | HsFLAG-ARP8_Ti_2   | 3.2683 | 0.2359 | 1303.54 | 1304.46  | 5286.2                                                            | 1 | 413.3  | 65   | 5   | K.NSLESYAFNMK.A                    |
| *             | HsFlag-FLJ90652_2  | 3.9575 | 0.3541 | 1304.43 | 1304.46  | 7369.1                                                            | 2 | 1477.2 | 85   | 10  | K.NSLESYAFNMK.A                    |
| *             | HsFLAG-TCF3_Ti_10  | 2.5191 | 0.1459 | 1304.54 | 1305.439 | 4201.9                                                            | 1 | 290.3  | 66.7 | 1   | K.CNEIINWLDK.N                     |
| *             | HsFlag-FLJ90652_2  | 4.0012 | 0.1542 | 1305.38 | 1305.439 | 6819.6                                                            | 4 | 1419.3 | 88.9 | 10  | K.CNEIINWLDK.N                     |
| *             | HsFLAG-p53-DNA-D   | 4.884  | 0.2504 | 1746.59 | 1746.831 | 9904                                                              | 1 | 1987.6 | 73.1 | 20  | K.NQTAEKEEFEHQQK.E                 |
| *             | HsFlag-FLJ90652_2  | 3.8403 | 0.2562 | 1747.86 | 1746.831 | 5867.2                                                            | 1 | 1288.9 | 53.8 | 1   | K.NQTAEKEEFEHQQK.E                 |
| gi 5901926 re | 9                  | 36     | 59.50% | 227     | 26227    | 8.8 cleavage and polyadenylation specific factor 5 [Homo sapiens] |   |        |      |     |                                    |
| *             | HsFlag-VPS71_Ti_10 | 3.2132 | 0.0962 | 1490.76 | 1490.743 | 5512.3                                                            | 2 | 1097.9 | 81.8 | 6   | K.YIQQTKPLTLER.T                   |
| *             | HsFLAG-p53-DNA-D   | 3.3439 | 0.2419 | 1748.67 | 1747.001 | 3845.4                                                            | 5 | 269.8  | 50   | 4   | R.TINLYPLTNYTFGTK.E                |
| *             | HsFLAG-Lin9_Ti_20  | 4.5531 | 0.3681 | 1727.58 | 1728.131 | 7843.1                                                            | 1 | 2187.8 | 82.1 | 2   | R.LPHVLLLQLGTTFFK.L                |
| *             | HsFLAG-FLJ20729_   | 4.8971 | 0.4118 | 1753.7  | 1753.904 | 4309.2                                                            | 1 | 1101.2 | 75   | 11  | K.LPGGELNPGEDEVEGLK.R              |
| *             | HsFLAG-Lin9_Ti_20  | 2.5508 | 0.0985 | 1090.32 | 1089.342 | 4844.7                                                            | 1 | 446.6  | 81.2 | 1   | K.RLMTEILGR.Q                      |
| *             | HsFlag-VPS71_Ti_10 | 4.3011 | 0.3699 | 2376.65 | 2376.556 | 6454.3                                                            | 1 | 685.8  | 50   | 4   | R.QDGVLQDWWIDDICIGNWWR.P           |
| *             | HsFLAG-FLJ20729_   | 4.5688 | 0.2614 | 2239.24 | 2238.594 | 4064.6                                                            | 1 | 770.4  | 44.4 | 1   | R.PNFEPQYPIPAHITKPK.E              |
| *             | HsFLAG-Lin9_Ti_20  | 3.6045 | 0.3462 | 3115.33 | 3116.627 | 5496.7                                                            | 1 | 477    | 35.7 | 4   | K.LVAAPLFELYDNAPGYGPIISSLPQLLSR.F  |
| *             | HsFLAG-Lin9_Ti_20  | 5.6914 | 0.4486 | 3118.02 | 3116.627 | 8279.6                                                            | 1 | 2061.6 | 35.7 | 3   | K.LVAAPLFELYDNAPGYGPIISSLPQLLSR.F  |
| gi 4557343 re | 21                 | 46     | 59.10% | 511     | 55366    | 6.9 antiqutin [Homo sapiens]                                      |   |        |      |     |                                    |
|               | HsFLAG-TCF3_Ti_10  | 3.3565 | 0.1918 | 1906.5  | 1906.069 | 6073.6                                                            | 1 | 736.4  | 56.2 | 1   | R.GEVITTYCPANNEPIAR.V              |
|               | HsFLAG-TCF3_Ti_10  | 2.9498 | 0.1128 | 1340.5  | 1340.43  | 5708.5                                                            | 2 | 583.2  | 72.7 | 1   | R.QASVADYEETVK.K                   |

|               |                   |        |        |         |          |         |                                                                  |        |      |     |                                            |
|---------------|-------------------|--------|--------|---------|----------|---------|------------------------------------------------------------------|--------|------|-----|--------------------------------------------|
|               | HsFLAG-TCF3_Ti_10 | 4.0738 | 0.3709 | 1474.6  | 1474.799 | 7171.1  | 1                                                                | 1483.2 | 76.9 | 2   | K.IQVLGSLVLSLEMGI                          |
|               | HsFLAG-TCF3_Ti_10 | 3.2581 | 0.2411 | 2683.11 | 2684.969 | 11249.5 | 1                                                                | 757.8  | 37   | 3   | K.ILVEGVGEVQYVDICDYAVGLSR.M                |
|               | HsFLAG-TCF3_Ti_10 | 2.758  | 0.2282 | 1169.5  | 1170.412 | 6139.2  | 6                                                                | 420.2  | 60   | 1   | R.MIGGPILPSE.S                             |
|               | HsFLAG-TCF3_Ti_10 | 3.5036 | 0.1533 | 1171.58 | 1170.412 | 5588.2  | 1                                                                | 1294.9 | 90   | 2   | R.MIGGPILPSE.S                             |
|               | HsFLAG-TCF3_Ti_10 | 3.3907 | 0.3712 | 1346.25 | 1345.579 | 5735.3  | 1                                                                | 938.7  | 73.1 | 2   | K.GAPTTSLISVAVTK.I                         |
|               | HsFLAG-TCF3_Ti_10 | 4.9525 | 0.4131 | 1451.44 | 1451.663 | 6761    | 1                                                                | 1797.9 | 80.8 | 4   | R.VNLLSFTGSTQVVGK.Q                        |
|               | HsFLAG-TCF3_Ti_10 | 2.4456 | 0.2649 | 1451.68 | 1451.663 | 5804    | 2                                                                | 340.4  | 53.8 | 2   | R.VNLLSFTGSTQVVGK.Q                        |
|               | HsFLAG-TCF3_Ti_10 | 6.0133 | 0.3744 | 3702.96 | 3702.199 | 8230.4  | 1                                                                | 1491.9 | 28.5 | 2   | R.SLLELGGNNAIIFEDADLSLVVPSALFAAVGTAGQR.C   |
|               | HsFLAG-TCF3_Ti_10 | 4.147  | 0.3895 | 1708.59 | 1708.914 | 7913.3  | 1                                                                | 1445.3 | 73.1 | 2   | R.LFIHESIHDDEVNR.L                         |
|               | HsFLAG-TCF3_Ti_10 | 4.082  | 0.3784 | 1906.93 | 1908.167 | 4233.2  | 1                                                                | 629.4  | 59.4 | 5   | R.VGNPWDPNVLYGPLHTK.Q                      |
|               | HsFLAG-TCF3_Ti_10 | 4.9239 | 0.1905 | 1910.1  | 1908.167 | 4979.1  | 1                                                                | 888.1  | 46.9 | 2   | R.VGNPWDPNVLYGPLHTK.Q                      |
|               | HsFLAG-TCF3_Ti_10 | 3.592  | 0.3662 | 1609.66 | 1608.893 | 8205.4  | 1                                                                | 1025.3 | 60.7 | 2   | K.QAVSMFLGAVEEAKK.E                        |
|               | HsFLAG-TCF3_Ti_10 | 4.9047 | 0.4476 | 4060.88 | 4061.645 | 9390.5  | 1                                                                | 803.7  | 22.2 | 2   | K.VMDRPGNYVEPTIVTGLGHDSIAHTETFPILYVFK.F    |
|               | HsFLAG-TCF3_Ti_10 | 4.7824 | 0.3366 | 1883.53 | 1884.055 | 7410.5  | 1                                                                | 1612.5 | 75   | 2   | K.FKNEEEVFAWNEVK.Q                         |
|               | HsFLAG-TCF3_Ti_10 | 5.2927 | 0.3629 | 2508.2  | 2507.683 | 4319.9  | 1                                                                | 673.9  | 50   | 5   | K.GSDCGIVNVNIPTSGAEIGGAFGGEK.H             |
| *             | HsFLAG-TCF3_Ti_10 | 3.0291 | 0.3368 | 1445.56 | 1445.491 | 6762.2  | 1                                                                | 938.8  | 73.1 | 2   | K.HTGGGREGSGDAWK.Q                         |
| *             | HsFLAG-TCF3_Ti_10 | 3.1249 | 0.1242 | 1231.69 | 1230.329 | 8341.3  | 2                                                                | 1042.1 | 77.8 | 1   | R.RSTCTINYSK.D                             |
| *             | HsFLAG-TCF3_Ti_10 | 3.8281 | 0.4411 | 2284.11 | 2285.568 | 9403.2  | 1                                                                | 644.1  | 44.7 | 2   | R.STCTINYSKDLPLAQGIKQ.-                    |
| *             | HsFLAG-TCF3_Ti_10 | 3.7695 | 0.2562 | 2287.43 | 2285.568 | 9653.2  | 1                                                                | 1042.5 | 32.9 | 1   | R.STCTINYSKDLPLAQGIKQ.-                    |
| gij7019371 re | 21                | 376    | 58.50% | 253     | 28278    | 5.2     | TCF3 (E2A) fusion partner (in childhood Leukemia) [Homo sapiens] |        |      |     |                                            |
| *             | HsFLAG-TCF3_Ti_10 | 3.4634 | 0.292  | 1234.58 | 1234.222 | 6335.4  | 1                                                                | 889.7  | 83.3 | 1   | R.ERDEEEEAAR.G                             |
| *             | HsFLAG-TCF3_Ti_10 | 2.7813 | 0.0935 | 836.52  | 835.982  | 3698.9  | 5                                                                | 543.3  | 91.7 | 1   | R.KYQALGR.R                                |
| *             | HsFLAG-TCF3_Ti_10 | 3.9852 | 0.2636 | 1333.43 | 1333.41  | 8728.2  | 1                                                                | 1334.6 | 83.3 | 13  | R.CREIEQVNER.V                             |
| *             | HsFLAG-FLJ20309_  | 2.7736 | 0.2976 | 1202.51 | 1203.251 | 3097.7  | 2                                                                | 299.2  | 66.7 | 1   | R.VLDSYGDDYR.A                             |
| *             | HsFLAG-TCF3_Ti_10 | 3.7899 | 0.3031 | 1203.69 | 1203.251 | 4935.7  | 1                                                                | 1072.4 | 88.9 | 2   | R.VLDSYGDDYR.A                             |
| *             | HsFLAG-TCF3_Ti_10 | 5.7915 | 0.4536 | 3231.55 | 3230.38  | 8248    | 1                                                                | 1886.2 | 35   | 5   | R.ASQFTIVLEDEGSQGTDAPTPGNAENEPPEK.E        |
| *             | HsFLAG-TCF3_Ti_10 | 5.2672 | 0.392  | 4008.64 | 4011.259 | 9087.3  | 1                                                                | 867    | 23.6 | 12  | R.ASQFTIVLEDEGSQGTDAPTPGNAENEPPEKETLSPPR.R |
| *             | HsFLAG-ARP5_Ti_10 | 4.7266 | 0.4764 | 1914.27 | 1915.073 | 7448.7  | 1                                                                | 1637.1 | 68.4 | 20  | R.RTPAPPEPGSPAPGEGPSGR.K                   |
| *             | HsFLAG-ARP5_Ti_10 | 5.3731 | 0.372  | 1915.68 | 1915.073 | 6768.6  | 1                                                                | 1461.4 | 43.4 | 9   | R.RTPAPPEPGSPAPGEGPSGR.K                   |
| *             | HsFLAG-FLJ20309_  | 4.0473 | 0.4443 | 1758.64 | 1758.885 | 4112.2  | 1                                                                | 652    | 58.3 | 19  | R.TPAPPEPGSPAPGEGPSGR.K                    |
| *             | HsFLAG-TCF3_Ti_10 | 3.739  | 0.2305 | 1759.16 | 1758.885 | 6391.9  | 2                                                                | 1240.5 | 43.1 | 1   | R.TPAPPEPGSPAPGEGPSGR.K                    |
| *             | HsFLAG-FLJ20309_  | 4.3356 | 0.2958 | 1678.92 | 1678.972 | 5303.1  | 1                                                                | 830.6  | 60   | 9   | R.RAGNALTPELAPVQIK.V                       |
| *             | HsFLAG-TCF3_Ti_10 | 5.7557 | 0.2586 | 3948.86 | 3949.323 | 11940.7 | 1                                                                | 1166.7 | 23.6 | 15  | R.RAGNALTPELAPVQIKVEEDFGFEADEALDSSWVSR.G   |
| *             | HsFLAG-TCF3_Ti_10 | 2.5248 | 0.3432 | 1521.68 | 1522.785 | 7629.8  | 1                                                                | 536.8  | 50   | 2   | R.AGNALTPELAPVQIK.V                        |
| *             | HsFLAG-TCF3_Ti_10 | 3.9043 | 0.307  | 1523.82 | 1522.785 | 4342.7  | 1                                                                | 619.4  | 64.3 | 20  | R.AGNALTPELAPVQIK.V                        |
| *             | HsFLAG-TCF3_Ti_10 | 6.3445 | 0.3936 | 3794.32 | 3793.135 | 4377.8  | 1                                                                | 545.8  | 26.5 | 66  | R.AGNALTPELAPVQIKVEEDFGFEADEALDSSWVSR.G    |
| *             | HsFLAG-TCF3_Ti_10 | 6.1006 | 0.5228 | 2290.02 | 2289.373 | 9886.9  | 1                                                                | 2609.9 | 65.8 | 156 | K.VEDFGFEADEALDSSWVSR.G                    |
| *             | HsFLAG-TCF3_Ti_10 | 5.3355 | 0.4539 | 2290.45 | 2289.373 | 11223.2 | 1                                                                | 2461.5 | 43.4 | 17  | K.VEDFGFEADEALDSSWVSR.G                    |
| *             | HsFLAG-TCF3_Ti_10 | 3.2538 | 0.3062 | 2686.67 | 2686.805 | 8409.9  | 1                                                                | 400.5  | 32.6 | 3   | K.VEDFGFEADEALDSSWVSRGPK.L                 |
| *             | HsFLAG-TCF3_Ti_10 | 4.4127 | 0.3364 | 2686.93 | 2686.805 | 5377.2  | 1                                                                | 654.9  | 33.7 | 1   | K.VEDFGFEADEALDSSWVSRGPK.L                 |
| *             | HsFLAG-TCF3_Ti_10 | 4.0266 | 0.3099 | 1347.42 | 1345.535 | 5406.4  | 1                                                                | 1174.6 | 79.2 | 3   | K.LLPYPTLASPASD.-                          |
| gij29788768 r | 27                | 622    | 58.00% | 445     | 49953    | 4.9     | tubulin, beta polypeptide paralog [Homo sapiens]                 |        |      |     |                                            |
|               | HsFLAG-ARP6_Ti_10 | 4.2213 | 0.2479 | 1617.4  | 1616.87  | 4265.9  | 1                                                                | 1041.3 | 78.6 | 14  | R.AILVDLEPGTMDSVR.S                        |

|                       |        |        |         |          |         |                                                         |        |      |                                                |
|-----------------------|--------|--------|---------|----------|---------|---------------------------------------------------------|--------|------|------------------------------------------------|
| HsFLAG-ARP6_Ti_1      | 5.3305 | 0.4496 | 2798.59 | 2800.065 | 6948.6  | 1                                                       | 1444.6 | 52   | 59 R.SGPFQIFRPDNFVFGQSGAGNNWAK.G               |
| HsFLAG-ARP6_Ti_1      | 7.0292 | 0.3487 | 2802.51 | 2800.065 | 7956.6  | 1                                                       | 2098.3 | 39   | 59 R.SGPFQIFRPDNFVFGQSGAGNNWAK.G               |
| HsFLAG-TCF3_Ti_1      | 7.1819 | 0.4728 | 1959.62 | 1960.151 | 9139.8  | 1                                                       | 3610.1 | 82.4 | 73 K.GHYTEGAELVDSVLDDVVR.K                     |
| HsFLAG-ARP6_Ti_1      | 4.9251 | 0.2887 | 1959.94 | 1960.151 | 7005.8  | 1                                                       | 1288.7 | 41.2 | 34 K.GHYTEGAELVDSVLDDVVR.K                     |
| HsFLAG-TIP49b_Ti_1    | 5.684  | 0.3213 | 2087.63 | 2088.325 | 8116.7  | 1                                                       | 2259   | 51.4 | 39 K.GHYTEGAELVDSVLDDVVR.K                     |
| HsSrcap_Ti_206.286    | 6.4593 | 0.361  | 2087.84 | 2088.325 | 9352.8  | 1                                                       | 2739.4 | 72.2 | 25 K.GHYTEGAELVDSVLDDVVR.K                     |
| HsYL1_Ti_103.1035     | 2.9392 | 0.1782 | 1078.13 | 1078.17  | 3062.5  | 4                                                       | 568.7  | 85.7 | 4 K.IREEYPDR.I                                 |
| HsFLAG-ARP6_Ti_1      | 4.2407 | 0.3299 | 1352.9  | 1352.65  | 7307.1  | 1                                                       | 1886.4 | 90.9 | 4 R.IMNTFSVMPSPK.V                             |
| HsFLAG-ARP6_Ti_1      | 6.4706 | 0.4855 | 4594.76 | 4595.903 | 4988.3  | 1                                                       | 541.4  | 23.7 | 83 K.VSDTVVEPYNATLSVHQLVENTDETYCIDNEALYDICFR.T |
| HsFLAG-ARP6_Ti_1      | 4.7805 | 0.3574 | 2709.73 | 2710.041 | 10385.7 | 1                                                       | 1165   | 31.2 | 30 K.LTTPTYGDLNHLVSATMSGVTTCLR.F               |
| HsFLAG-ARP6_Ti_1      | 5.4731 | 0.383  | 2710.22 | 2710.041 | 8352.5  | 1                                                       | 1412.5 | 47.9 | 39 K.LTTPTYGDLNHLVSATMSGVTTCLR.F               |
| HsFLAG-ARP6_Ti_1      | 2.1817 | 0.2119 | 1130.19 | 1131.277 | 3484.6  | 1                                                       | 331.1  | 72.2 | 1 R.FPGQLNADLR.K                               |
| HsFLAG-ARP6_Ti_1      | 3.1035 | 0.1934 | 1133.31 | 1131.277 | 4537.1  | 1                                                       | 968.3  | 94.4 | 20 R.FPGQLNADLR.K                              |
| HsFLAG-ARP6_Ti_1      | 2.7216 | 0.2275 | 1259.45 | 1259.451 | 6377.3  | 1                                                       | 1130.1 | 85   | 3 R.FPGQLNADLR.K                               |
| Hs293Flag-les2_Ti_1   | 4.1115 | 0.2404 | 1271.88 | 1272.594 | 7432.2  | 1                                                       | 1437.4 | 85   | 9 R.KLAVNMVPFPR.L                              |
| HsFLAG-Lin9_Ti_202    | 3.7432 | 0.2947 | 1144.31 | 1144.42  | 4934.2  | 1                                                       | 1119.4 | 94.4 | 37 K.LAVNMVPFPR.L                              |
| HsFLAG-ARP6_Ti_1      | 3.784  | 0.2563 | 1621.62 | 1621.94  | 4747.2  | 1                                                       | 1118   | 76.9 | 9 R.LHFFMPGFAPLTSR.G                           |
| HsFLAG-TCF3_Ti_1      | 3.8701 | 0.3677 | 1709.52 | 1708.967 | 3488.3  | 1                                                       | 695.7  | 75   | 2 R.ALTVPELTQQMFDSK.N                          |
| HsFLAG-ARP6_Ti_1      | 3.1514 | 0.3044 | 1065.99 | 1066.201 | 5998.7  | 1                                                       | 1325.1 | 87.5 | 4 K.NMMAACDPR.H                                |
| HsFLAG-ARP6_Ti_1      | 3.1252 | 0.3693 | 1054.29 | 1054.277 | 4338.1  | 1                                                       | 916.8  | 93.8 | 2 R.YLTVAAIFR.G                                |
| Hs293Flag-les2_Ti_1   | 4.5214 | 0.2599 | 1447.29 | 1447.603 | 7900.2  | 2                                                       | 1960.1 | 86.4 | 10 K.EVDEQMLNVQNK.N                            |
| HsScrap_Ti_102.174    | 3.2133 | 0.1712 | 1447.35 | 1447.603 | 3682    | 1                                                       | 435.8  | 72.7 | 4 K.EVDEQMLNVQNK.N                             |
| HsFLAG-ARP6_Ti_1      | 4.0978 | 0.3327 | 1699.12 | 1697.888 | 5299.1  | 1                                                       | 715    | 61.5 | 39 K.NSSYFVEWIPNNVK.T                          |
| HsFLAG-TCF3_Ti_1      | 2.8997 | 0.2395 | 1029.45 | 1029.147 | 6481.9  | 1                                                       | 1559.4 | 93.8 | 2 K.TAVCDIPPR.G                                |
| HsFLAG-ARP6_Ti_1      | 4.1879 | 0.3996 | 1386.16 | 1386.612 | 7897.9  | 1                                                       | 1417.6 | 85   | 10 K.RISEQFTAMFR.R                             |
| HsFLAG-ARP6_Ti_1      | 3.7061 | 0.3498 | 1229.27 | 1230.424 | 8240.8  | 1                                                       | 1542.7 | 88.9 | 7 R.ISEQFTAMFR.R                               |
| gij 13775202 r        | 17     | 108    | 58.00%  | 343      | 37218   | 9.4 high mobility group AT-hook 1-like 4 [Homo sapiens] |        |      |                                                |
| * Hs293Flag-les2_Ti_1 | 4.572  | 0.3997 | 2196.68 | 2196.384 | 9970.9  | 1                                                       | 1536.2 | 57.9 | 24 K.HHQEEDAGPTQPSPAKPQLK.L                    |
| * HsFLAG-ARP8_Ti_2    | 5.5666 | 0.3423 | 2196.68 | 2196.384 | 6746.2  | 1                                                       | 1200.9 | 43.4 | 13 K.HHQEEDAGPTQPSPAKPQLK.L                    |
| * Hs293Flag-les2_Ti_1 | 2.1007 | 0.0817 | 872.38  | 873.04   | 4532.6  | 1                                                       | 318.4  | 68.8 | 1 K.LGGQVLGTK.S                                |
| * HsFlag-FLJ90652_29  | 3.4624 | 0.1566 | 873.15  | 873.04   | 5001.7  | 2                                                       | 985    | 87.5 | 4 K.LGGQVLGTK.S                                |
| * Hs293Flag-les2_Ti_1 | 4.243  | 0.4846 | 2745.94 | 2747.064 | 7675.8  | 1                                                       | 1157.5 | 47.8 | 2 R.SPSPLMVVDNEEPMEGVPLEQYR.A                  |
| * Hs293Flag-les2_Ti_1 | 4.1299 | 0.2103 | 1700.63 | 1700.845 | 7323    | 1                                                       | 1694.4 | 78.6 | 7 R.AWLDEDSNLSPSPLR.D                          |
| * Hs293Flag-les2_Ti_1 | 5.2296 | 0.4059 | 1733.32 | 1733.743 | 9574.5  | 1                                                       | 2371.4 | 76.7 | 17 R.DLSGGLGGQEEEEEQR.W                        |
| * HsFLAG-ARP5_Ti_1    | 5.1758 | 0.4056 | 2059.38 | 2060.268 | 9693.8  | 1                                                       | 1858.9 | 64.7 | 6 R.WLDALEKGELDDNGDLKK.E                       |
| * HsFLAG-ARP5_Ti_1    | 4.8154 | 0.2184 | 2060.2  | 2060.268 | 5579.2  | 1                                                       | 726.9  | 41.2 | 3 R.WLDALEKGELDDNGDLKK.E                       |
| * HsFLAG-FLJ20309_    | 3.387  | 0.1759 | 1204.34 | 1204.279 | 8751    | 1                                                       | 1514.8 | 85   | 7 K.GELDDNGDLKK.E                              |
| * HsFlag-FLJ90652_29  | 3.8321 | 0.3315 | 2904.86 | 2904.416 | 6614    | 1                                                       | 832.5  | 42.3 | 4 R.SQPSPMLPLPVAEGCPPPALTEEMLLK.R              |
| * HsFLAG-ARP5_Ti_1    | 3.8764 | 0.3858 | 3410.25 | 3409.749 | 6484.5  | 1                                                       | 878    | 27.3 | 1 R.YCSGAQGSTLSFPPGVPAPTAVSQRPSPSGPPPR.C       |
| * HsFLAG-FLJ20309_    | 1.9778 | 0.0929 | 1166.62 | 1167.242 | 4337.9  | 5                                                       | 235.3  | 61.1 | 1 R.CSVPGCPHPR.R                               |
| * Hs293Flag-les2_Ti_1 | 3.2103 | 0.1835 | 1167.3  | 1167.242 | 3449    | 6                                                       | 477.4  | 77.8 | 6 R.CSVPGCPHPR.R                               |
| * Hs293Flag-les2_Ti_1 | 2.9053 | 0.2227 | 1456.24 | 1457.559 | 3081.4  | 2                                                       | 125.9  | 54.5 | 2 R.TGQALCSLQCYR.I                             |
| * Hs293Flag-les2_Ti_1 | 4.1214 | 0.236  | 1457.05 | 1457.559 | 7626.5  | 1                                                       | 1447.6 | 77.3 | 1 R.TGQALCSLQCYR.I                             |

|                |                     |        |        |         |          |         |                                                               |        |      |    |                                          |
|----------------|---------------------|--------|--------|---------|----------|---------|---------------------------------------------------------------|--------|------|----|------------------------------------------|
| *              | Hs293Flag-Ies2_Ti_1 | 2.8237 | 0.2971 | 1266.41 | 1266.437 | 6317.3  | 1                                                             | 462.3  | 46.2 | 9  | R.LGGPEPGSPLLAT.-                        |
| gij 36287069 r | 26                  | 129    | 57.50% | 546     | 61798    | 8.6     | HIV-1 Tat interactive protein, 60kDa isoform 1 [Homo sapiens] |        |      |    |                                          |
| *              | HsH2AZ-FLAG_293_    | 5.1271 | 0.2402 | 2449.24 | 2447.72  | 8155.3  | 1                                                             | 1782.9 | 38   | 5  | R.ARGPPVADPGVALSPQGEIIEGCR.L             |
| *              | HsYL1-FLAG_Ti_203   | 3.8472 | 0.3345 | 2220.87 | 2220.453 | 6116.7  | 1                                                             | 723.7  | 47.6 | 1  | R.GPPVADPGVALSPQGEIIEGCR.L               |
|                | HsFLAG-TIP49b_Ti_   | 4.0613 | 0.2809 | 2157.52 | 2157.345 | 6935.8  | 1                                                             | 1343.2 | 61.8 | 8  | R.RNQDNEDEWPLAEILSVK.D                   |
|                | HsFLAG-TIP49a_Ti_   | 5.9002 | 0.39   | 2002.07 | 2001.157 | 4146.4  | 1                                                             | 1108.3 | 75   | 25 | R.NQDNEDEWPLAEILSVK.D                    |
|                | HsFLAG-TIP49b_Ti_   | 3.931  | 0.2443 | 1459.19 | 1459.687 | 7907.7  | 1                                                             | 1982.1 | 85   | 9  | K.LFYVHYIDFNK.R                          |
|                | HsMRGBP-FLAG_Ti_    | 3.6649 | 0.2151 | 1342.17 | 1341.469 | 7315.5  | 5                                                             | 1058.4 | 77.8 | 8  | K.RLDEWVITHER.L                          |
|                | HsMRGBP-FLAG_Ti_    | 4.1964 | 0.4581 | 2762.29 | 2762.919 | 8168.9  | 1                                                             | 636.6  | 29.2 | 1  | K.EREAIPGGEPDQPLSSSSCLQPNHR.S            |
|                | HsMRGBP-FLAG_Ti_    | 2.7358 | 0.1335 | 2964.16 | 2964.351 | 8125.2  | 3                                                             | 239.8  | 25   | 1  | K.RKVEVSPATPVPSETAPASVFPQNGAAR.R         |
|                | HsMRGBP-FLAG_Ti_    | 4.8721 | 0.2082 | 2964.31 | 2964.351 | 5782.1  | 1                                                             | 938.8  | 33   | 6  | K.RKVEVSPATPVPSETAPASVFPQNGAAR.R         |
|                | HsFLAG-TIP49b_Ti_   | 4.4035 | 0.5383 | 2806.95 | 2808.164 | 5689.3  | 1                                                             | 846.6  | 46.3 | 2  | R.KVEVSPATPVPSETAPASVFPQNGAAR.R          |
|                | HsMRGBP-FLAG_Ti_    | 4.4889 | 0.4004 | 2808.88 | 2808.164 | 7299    | 2                                                             | 529.5  | 26.9 | 2  | R.KVEVSPATPVPSETAPASVFPQNGAAR.R          |
|                | HsMRGBP-FLAG_Ti_    | 5.2622 | 0.4905 | 2309.84 | 2309.285 | 4808    | 1                                                             | 697.7  | 54.8 | 5  | K.SNCLGTDESDQDSSDGIAPSAPR.M              |
|                | HsTIP60_Ti_103.173  | 3.4038 | 0.1375 | 1104.19 | 1104.215 | 4889.7  | 1                                                             | 1005   | 87.5 | 2  | K.NIECIELGR.H                            |
|                | HsMRGBP-FLAG_Ti_    | 4.31   | 0.3745 | 3164.78 | 3166.616 | 4332.8  | 1                                                             | 428.6  | 39.6 | 3  | K.PWYFSPYPQELTTLPLVYLCEFLK.Y             |
|                | HsFLAG-TIP49b_Ti_   | 2.2903 | 0.2    | 1082.46 | 1083.192 | 4368.2  | 1                                                             | 328.9  | 68.8 | 2  | R.HPPGNEIYR.K                            |
|                | HsYL1_Ti_104.1972.  | 4.1175 | 0.3944 | 1370.97 | 1370.548 | 5278.6  | 1                                                             | 1020.5 | 77.3 | 1  | R.KGTISFFEIDGR.K                         |
|                | HsTIP60_Ti_106.267  | 3.8881 | 0.4063 | 1241.66 | 1242.374 | 6385    | 1                                                             | 1105.6 | 80   | 1  | K.GTISFFEIDGR.K                          |
|                | HsMRGBP-FLAG_Ti_    | 3.3832 | 0.2357 | 1298.1  | 1297.46  | 6746.3  | 1                                                             | 1070.4 | 80   | 3  | K.SYSQNLCLLAK.C                          |
|                | HsFLAG-TIP49b_Ti_   | 2.7789 | 0.2234 | 1154.44 | 1155.342 | 6289.7  | 1                                                             | 805.7  | 72.2 | 2  | K.GFHIVGYFSK.E                           |
|                | HsH2AZ-FLAG_293_    | 3.7784 | 0.3531 | 2270.61 | 2270.467 | 4716.2  | 2                                                             | 474.2  | 52.8 | 3  | K.ESTEDYNVACILTLPYQR.R                   |
|                | HsMRGBP-FLAG_Ti_    | 3.903  | 0.3855 | 1848.89 | 1848.106 | 3367.8  | 1                                                             | 697.9  | 65.6 | 10 | K.TGTPEKPLSDLGLLSYR.S                    |
|                | HsMRGBP-FLAG_Ti_    | 4.5772 | 0.3751 | 2332.09 | 2332.57  | 8518.1  | 1                                                             | 689.7  | 42.5 | 5  | K.SESGERPQITINEISEITSIK.K                |
|                | HsFLAG-TIP49b_Ti_   | 6.2028 | 0.3682 | 2219.45 | 2218.555 | 7082.8  | 1                                                             | 2777.8 | 79.4 | 9  | K.KEDVISTLQYLNINYYK.G                    |
|                | HsH2AZ-FLAG_293_    | 3.453  | 0.3001 | 2090.21 | 2090.381 | 8527.1  | 1                                                             | 900.2  | 53.1 | 5  | K.EDVISTLQYLNINYYK.G                     |
|                | HsMRGBP-FLAG_Ti_    | 4.6615 | 0.4477 | 1947.48 | 1946.124 | 5764    | 1                                                             | 1125.5 | 68.8 | 9  | K.GQYILTSEDIVDGHHER.A                    |
|                | HsFLAG-TIP49b_Ti_   | 1.8752 | 0.2315 | 902.31  | 903.035  | 4604.6  | 5                                                             | 312    | 66.7 | 1  | K.CLHFTP.K                               |
| gij 41152056 r | 51                  | 265    | 57.30% | 972     | 109478   | 5       | U5 snRNP-specific protein, 116 kD [Homo sapiens]              |        |      |    |                                          |
| *              | HsFlag-ZnF-HIT2_Ti_ | 6.0183 | 0.4027 | 3667.97 | 3669.618 | 9118.9  | 1                                                             | 1536.2 | 29.8 | 4  | K.DLDEMDDDDDDDDVGDHDDHPGMEVVLHEDK.K      |
| *              | HsFlag-ZnF-HIT2_Ti_ | 4.9853 | 0.3828 | 3710.71 | 3711.111 | 7469.2  | 1                                                             | 1204.2 | 29.8 | 4  | K.KYYPTAAEVYGPVEVETIVQEEDTQPLTEPIIK.P    |
| *              | HsFlag-ZnF-HIT2_Ti_ | 7.8508 | 0.5141 | 4035.77 | 4035.534 | 8731.1  | 1                                                             | 1827.4 | 32.4 | 11 | K.KYYPTAAEVYGPVEVETIVQEEDTQPLTEPIIKPVK.T |
| *              | HsFlag-ZnF-HIT2_Ti_ | 3.9217 | 0.3451 | 3905.36 | 3907.36  | 5873.4  | 1                                                             | 444.1  | 22   | 2  | K.YYPTAAEVYGPVEVETIVQEEDTQPLTEPIIKPVK.T  |
| *              | HsFlag-ZnF-HIT2_Ti_ | 4.3993 | 0.3634 | 2018.71 | 2019.194 | 8296.5  | 1                                                             | 1304.4 | 66.7 | 9  | K.TCFVDCLIEQTHPEIR.K                     |
| *              | HsFlag-ZnF-HIT2_Ti_ | 3.9045 | 0.3616 | 2018.75 | 2019.194 | 4005.4  | 1                                                             | 830.3  | 50   | 1  | K.TCFVDCLIEQTHPEIR.K                     |
| *              | HsFlag-ZnF-HIT2_Ti_ | 5.1535 | 0.3633 | 2366.88 | 2366.512 | 6617.2  | 1                                                             | 1672.1 | 70.6 | 9  | K.RYDQDLCYTDILFTEQER.G                   |
| *              | HsFlag-ZnF-HIT2_Ti_ | 5.454  | 0.3042 | 2368.84 | 2366.512 | 8388.2  | 1                                                             | 1741.1 | 45.6 | 6  | K.RYDQDLCYTDILFTEQER.G                   |
| *              | HsFlag-ZnF-HIT2_Ti_ | 2.504  | 0.1439 | 1256.63 | 1257.47  | 9355.7  | 1                                                             | 643.3  | 59.1 | 1  | K.STPVTVVLPTDK.G                         |
| *              | HsFlag-ZnF-HIT2_Ti_ | 6.0262 | 0.5047 | 2683.37 | 2684.983 | 6179.5  | 1                                                             | 832.9  | 45.7 | 2  | K.SYLFNIMDTPGHVNFSDDEVTAGLR.I            |
| *              | HsFlag-ZnF-HIT2_Ti_ | 4.1033 | 0.3895 | 2684.95 | 2684.983 | 7434.9  | 1                                                             | 1260   | 35.9 | 1  | K.SYLFNIMDTPGHVNFSDDEVTAGLR.I            |
| *              | HsFlag-ZnF-HIT2_Ti_ | 6.6237 | 0.4057 | 2250.06 | 2250.572 | 9004.8  | 1                                                             | 1771.9 | 41.2 | 4  | R.ISDGVVLFDAAEGVMLNTER.L                 |
| *              | HsFlag-ZnF-HIT2_Ti_ | 5.7383 | 0.5188 | 2250.9  | 2250.572 | 11187.9 | 1                                                             | 2354.4 | 60   | 10 | R.ISDGVVLFDAAEGVMLNTER.L                 |
| *              | HsFlag-ZnF-HIT2_Ti_ | 2.0106 | 0.1862 | 1017.71 | 1018.208 | 8547.8  | 4                                                             | 633.8  | 68.8 | 1  | R.LAVTVCINK.I                            |

|             |                    |        |        |         |          |         |                                             |        |      |                                         |
|-------------|--------------------|--------|--------|---------|----------|---------|---------------------------------------------|--------|------|-----------------------------------------|
| *           | HsFlag-ZnF-HIT2_Ti | 5.8906 | 0.4936 | 1895.93 | 1896.063 | 5458.4  | 1                                           | 1765.3 | 80   | 2 K.IYADTFGDINYQEFAK.R                  |
| *           | HsFlag-ZnF-HIT2_Ti | 3.7425 | 0.1965 | 1408.8  | 1409.63  | 5084.4  | 1                                           | 918.6  | 80   | 4 K.RLWGDYFNPK.T                        |
| *           | HsFlag-ZnF-HIT2_Ti | 3.3667 | 0.213  | 1485.58 | 1485.763 | 6359.9  | 3                                           | 683.4  | 63.6 | 4 R.SFVEFILEPLYK.I                      |
| *           | HsFlag-ZnF-HIT2_Ti | 4.4383 | 0.2638 | 1486.58 | 1485.763 | 6960.2  | 1                                           | 1682.2 | 86.4 | 24 R.SFVEFILEPLYK.I                     |
| *           | HsFlag-ZnF-HIT2_Ti | 5.5231 | 0.4644 | 1583.73 | 1583.825 | 6572.6  | 1                                           | 1709.3 | 78.6 | 2 K.ILAQVVGVDVDTSLPR.T                  |
| *           | HsFlag-ZnF-HIT2_Ti | 4.0292 | 0.326  | 1240.47 | 1240.442 | 6324.7  | 1                                           | 1394.8 | 85   | 3 R.TLDELGIHLTK.E                       |
| *           | HsFlag-ZnF-HIT2_Ti | 4.6784 | 0.4257 | 1739.13 | 1740.007 | 8431.9  | 1                                           | 2011.5 | 78.6 | 5 R.TLDELGIHLTKKEELK.L                  |
| *           | HsFlag-ZnF-HIT2_Ti | 4.5925 | 0.4374 | 1731.01 | 1731.88  | 6923.2  | 1                                           | 1371.2 | 71.4 | 4 K.MYSTDDGVQFHAFGR.V                   |
| *           | HsFlag-ZnF-HIT2_Ti | 2.7558 | 0.2758 | 1306.7  | 1307.536 | 4617.1  | 1                                           | 551.2  | 58.3 | 6 R.VLSGTIHAGQPVK.V                     |
| *           | HsFlag-ZnF-HIT2_Ti | 4.0089 | 0.3284 | 1307.38 | 1307.536 | 7682.6  | 1                                           | 1363   | 75   | 14 R.VLSGTIHAGQPVK.V                    |
| *           | HsFlag-ZnF-HIT2_Ti | 5.4798 | 0.3363 | 2429.98 | 2428.535 | 8838.3  | 1                                           | 1924.8 | 60   | 2 K.VLGENYTLDEEDSQICTVGR.L              |
| *           | HsFlag-ZnF-HIT2_Ti | 5.2382 | 0.2818 | 2846.34 | 2847.29  | 7780.9  | 1                                           | 1421.1 | 50   | 1 R.YHIEVNRVPAGNWVLIIEGVDQPIVK.T        |
| *           | HsFlag-ZnF-HIT2_Ti | 6.7659 | 0.3992 | 2846.91 | 2847.29  | 9298.4  | 1                                           | 2504.8 | 40.6 | 2 R.YHIEVNRVPAGNWVLIIEGVDQPIVK.T        |
| *           | HsFlag-ZnF-HIT2_Ti | 5.3051 | 0.4351 | 1934.49 | 1935.274 | 8651.3  | 1                                           | 1994.5 | 70.6 | 3 R.VPAGNWVLIIEGVDQPIVK.T               |
| *           | HsFlag-ZnF-HIT2_Ti | 3.6474 | 0.2017 | 1402.42 | 1402.593 | 7338.1  | 1                                           | 1258.6 | 77.3 | 4 R.GNEEAQIFRPLK.F                      |
| *           | HsFlag-ZnF-HIT2_Ti | 3.3819 | 0.2708 | 1393.49 | 1393.623 | 3890.8  | 3                                           | 574.4  | 70.8 | 3 K.IAVEPVNPSELPM                       |
| *           | HsFlag-ZnF-HIT2_Ti | 5.9214 | 0.3127 | 3749.46 | 3751.166 | 10323.4 | 1                                           | 1543.4 | 28.9 | 1 K.SYPSLTTKVEESGEHVILGTGELYLDCVMHDLR.K |
| *           | HsFlag-ZnF-HIT2_Ti | 5.1652 | 0.4633 | 2873.02 | 2873.173 | 9286    | 1                                           | 2284.6 | 39.6 | 2 K.VEESGEHVILGTGELYLDCVMHDLR.K         |
| *           | HsFlag-ZnF-HIT2_Ti | 6.5275 | 0.4103 | 3000.89 | 3001.347 | 9989.3  | 1                                           | 1850.5 | 36   | 4 K.VEESGEHVILGTGELYLDCVMHDLR.K         |
| *           | HsFlag-ZnF-HIT2_Ti | 3.5341 | 0.4275 | 2081.7  | 2082.322 | 5652.9  | 1                                           | 676.6  | 50   | 3 K.VADPVVTFCTVETSSLK.C                 |
| *           | HsFlag-ZnF-HIT2_Ti | 2.1648 | 0.1829 | 967.54  | 967.033  | 3289.7  | 1                                           | 260.6  | 78.6 | 1 K.CFAETPNK.K                          |
| *           | HsFlag-ZnF-HIT2_Ti | 1.8358 | 0.1216 | 1094.5  | 1095.207 | 2876.2  | 3                                           | 139.9  | 62.5 | 1 K.CFAETPNKK.N                         |
| *           | HsFlag-ZnF-HIT2_Ti | 2.681  | 0.243  | 1096.88 | 1095.207 | 6324.7  | 1                                           | 673.1  | 75   | 1 K.CFAETPNKK.N                         |
| *           | HsFlag-ZnF-HIT2_Ti | 2.9652 | 0.2543 | 1144.59 | 1145.4   | 4915.4  | 1                                           | 590.8  | 72.2 | 2 K.ITMIAEPLEK.G                        |
| *           | HsFlag-ZnF-HIT2_Ti | 3.9498 | 0.1413 | 1986.91 | 1987.177 | 8676.3  | 1                                           | 1266.2 | 42.2 | 2 K.GLAEDIENEVVQITWNR.K                 |
| *           | HsFlag-ZnF-HIT2_Ti | 5.0191 | 0.281  | 1987.73 | 1987.177 | 8510.2  | 1                                           | 1586.8 | 65.6 | 18 K.GLAEDIENEVVQITWNR.K                |
| *           | HsFlag-ZnF-HIT2_Ti | 2.8654 | 0.0997 | 1098.34 | 1098.287 | 4516    | 3                                           | 794.8  | 87.5 | 2 K.KLGEFFQTK.Y                         |
| *           | HsFlag-ZnF-HIT2_Ti | 4.3367 | 0.1799 | 2759.05 | 2759.042 | 6779    | 1                                           | 671.2  | 40   | 9 R.SIWAFGPDATGPNILVDDTLPSEVDK.A        |
| *           | HsFlag-ZnF-HIT2_Ti | 4.4637 | 0.4222 | 1394.51 | 1394.53  | 6425.7  | 1                                           | 1417.8 | 81.8 | 3 K.DSIVQGFQWGTR.E                      |
| *           | HsFlag-ZnF-HIT2_Ti | 2.5653 | 0.2086 | 1460.87 | 1461.704 | 3550    | 9                                           | 209.1  | 45.8 | 1 K.ILDAVVAQEPLHR.G                     |
| *           | HsFlag-ZnF-HIT2_Ti | 4.0873 | 0.3856 | 1461.57 | 1461.704 | 6991.8  | 1                                           | 1435.9 | 79.2 | 14 K.ILDAVVAQEPLHR.G                    |
| *           | HsFlag-ZnF-HIT2_Ti | 4.1197 | 0.2457 | 2994.01 | 2993.41  | 5112.8  | 1                                           | 420.4  | 36   | 2 R.LMEPYFVEVQAPADCVSAVYTVLAR.R         |
| *           | HsFlag-ZnF-HIT2_Ti | 4.6168 | 0.4262 | 2050.72 | 2051.353 | 5207.4  | 1                                           | 747.6  | 61.1 | 5 R.RGHVTQDAPIPGSPLYTIK.A               |
| *           | HsFlag-ZnF-HIT2_Ti | 4.2365 | 0.241  | 2051.43 | 2051.353 | 5323.8  | 1                                           | 1178.4 | 47.2 | 1 R.RGHVTQDAPIPGSPLYTIK.A               |
| *           | HsFlag-ZnF-HIT2_Ti | 5.4344 | 0.3348 | 1894.64 | 1895.166 | 5326.2  | 1                                           | 2128   | 82.4 | 22 R.GHVTQDAPIPGSPLYTIK.A               |
| *           | HsFlag-ZnF-HIT2_Ti | 4.4254 | 0.4208 | 1800.88 | 1800.021 | 5182.6  | 1                                           | 982.6  | 70   | 20 K.AFIPAIDSFGFETDLR.T                 |
| *           | HsFLAG-p53-DNA-D   | 3.5175 | 0.2766 | 1439.3  | 1439.709 | 6093.8  | 1                                           | 1215.3 | 81.8 | 3 K.FFDDPMLLELAK.Q                      |
| gij11036646 | 10                 | 142    | 57.10% | 126     | 13944    | 10.4    | H2B histone family, member S [Homo sapiens] |        |      |                                         |
| gij18105048 | 10                 | 142    | 57.10% | 126     | 13890    | 10.3    | H2B histone family, member T [Homo sapiens] |        |      |                                         |
|             | HsH2AZ-FLAG_293_   | 2.9916 | 0.2187 | 1265.44 | 1266.436 | 4983.9  | 1                                           | 594.3  | 66.7 | 15 R.KESYSVYVYK.V                       |
|             | HsFLAG-p53-DNA-D   | 3.6871 | 0.2815 | 1266.22 | 1266.436 | 5282.1  | 1                                           | 943    | 83.3 | 19 R.KESYSVYVYK.V                       |
|             | HsFLAG-p53-DNA-D   | 2.1092 | 0.1853 | 1137.53 | 1138.262 | 5401.3  | 4                                           | 300.5  | 68.8 | 3 K.ESYSVYVYK.V                         |
|             | HsYL1_Ti_106.1903. | 2.8877 | 0.1799 | 1509.99 | 1509.746 | 5149.6  | 1                                           | 638.4  | 53.8 | 1 K.VLKQVHPDTGISSK.A                    |



|               |                    |        |        |         |          |         |                                                                |        |      |                                  |
|---------------|--------------------|--------|--------|---------|----------|---------|----------------------------------------------------------------|--------|------|----------------------------------|
|               | HsFLAG-ARP8_Ti_2   | 2.2788 | 0.2719 | 1169.93 | 1169.28  | 2245.9  | 4                                                              | 158.6  | 65   | 2 K.QVHPDTGISSK.A                |
|               | HsFLAG-ARP8_Ti_2   | 2.763  | 0.201  | 1171.27 | 1169.28  | 4157.9  | 1                                                              | 655.4  | 80   | 1 K.QVHPDTGISSK.A                |
|               | HsFlag-VPS71_Ti_10 | 5.3194 | 0.4845 | 1744.79 | 1745.021 | 7989.3  | 1                                                              | 1617.2 | 75   | 97 K.AMGIMNSFVNDIFER.I           |
|               | HsYL1_Ti_104.2355. | 3.3611 | 0.173  | 1752.76 | 1752.107 | 3644.4  | 1                                                              | 813.1  | 73.3 | 1 R.EIQTAVRLLLPGELAK.H           |
|               | HsYL1_Ti_106.2215. | 3.3096 | 0.3494 | 1763.68 | 1764.075 | 4726.2  | 1                                                              | 785    | 65.6 | 2 R.LLLPGELAKHAVSEGTK.A          |
|               | HsYL1_Ti_106.1936. | 2.8482 | 0.4352 | 1779.64 | 1779.003 | 6772.3  | 1                                                              | 611.5  | 53.1 | 1 K.HAVSEGTKAVTKYTSAK.-          |
| gj 20336754 r | 9                  | 116    | 57.10% | 126     | 13904    | 10.3    | H2B histone family, member R [Homo sapiens]                    |        |      |                                  |
|               | HsYL1_Ti_104.1550. | 2.8197 | 0.2773 | 1279.58 | 1280.463 | 4592    | 1                                                              | 597.6  | 66.7 | 8 R.KESYSIYVYK.V                 |
|               | HsFLAG-p53-DNA-D   | 3.5477 | 0.291  | 1280.44 | 1280.463 | 5752.7  | 1                                                              | 1177.4 | 88.9 | 3 R.KESYSIYVYK.V                 |
|               | HsYL1_Ti_106.1903. | 2.8877 | 0.1799 | 1509.99 | 1509.746 | 5149.6  | 1                                                              | 638.4  | 53.8 | 1 K.VLKQVHPDTGISSK.A             |
|               | HsFLAG-ARP8_Ti_2   | 2.2788 | 0.2719 | 1169.93 | 1169.28  | 2245.9  | 4                                                              | 158.6  | 65   | 2 K.QVHPDTGISSK.A                |
|               | HsFLAG-ARP8_Ti_2   | 2.763  | 0.201  | 1171.27 | 1169.28  | 4157.9  | 1                                                              | 655.4  | 80   | 1 K.QVHPDTGISSK.A                |
|               | HsFlag-VPS71_Ti_10 | 5.3194 | 0.4845 | 1744.79 | 1745.021 | 7989.3  | 1                                                              | 1617.2 | 75   | 97 K.AMGIMNSFVNDIFER.I           |
|               | HsYL1_Ti_104.2355. | 3.3611 | 0.173  | 1752.76 | 1752.107 | 3644.4  | 1                                                              | 813.1  | 73.3 | 1 R.EIQTAVRLLLPGELAK.H           |
|               | HsYL1_Ti_106.2215. | 3.3096 | 0.3494 | 1763.68 | 1764.075 | 4726.2  | 1                                                              | 785    | 65.6 | 2 R.LLLPGELAKHAVSEGTK.A          |
|               | HsYL1_Ti_106.1936. | 2.8482 | 0.4352 | 1779.64 | 1779.003 | 6772.3  | 1                                                              | 611.5  | 53.1 | 1 K.HAVSEGTKAVTKYTSAK.-          |
| gj 4506693 re | 8                  | 123    | 57.00% | 135     | 15550    | 9.8     | ribosomal protein S17 [Homo sapiens]                           |        |      |                                  |
|               | HsFlag-NUFIP_Ti_10 | 3.4626 | 0.1594 | 1047.49 | 1046.128 | 8531.8  | 3                                                              | 1166.9 | 87.5 | 7 R.LGNDFHTNK.R                  |
| *             | HsFlag-NUFIP_Ti_10 | 3.4712 | 0.1998 | 1415.71 | 1415.639 | 3337.3  | 7                                                              | 534.5  | 77.3 | 2 K.RVCEEIAIIPSK.K               |
| *             | HsFlag-NUFIP_Ti_10 | 3.4456 | 0.0902 | 1543.59 | 1543.813 | 3666.5  | 5                                                              | 517.5  | 66.7 | 3 K.RVCEEIAIIPSK.L               |
|               | HsFlag-NUFIP_Ti_11 | 2.052  | 0.0995 | 1132.49 | 1133.394 | 5080.7  | 8                                                              | 508.8  | 66.7 | 1 K.IAGYVTHLMK.R                 |
|               | HsFlag-NUFIP_Ti_10 | 3.3813 | 0.2869 | 1133.44 | 1133.394 | 6665.6  | 1                                                              | 1229.4 | 88.9 | 14 K.IAGYVTHLMK.R                |
|               | HsFlag-NUFIP_Ti_10 | 4.3814 | 0.3551 | 2646.69 | 2646.868 | 7985.9  | 1                                                              | 767.2  | 45.5 | 8 R.RDNYVPEVSALDQEIIIVDPDK.E     |
|               | HsFlag-NUFIP_Ti_10 | 5.5254 | 0.383  | 2489.85 | 2490.68  | 6238.8  | 1                                                              | 1233.3 | 57.1 | 57 R.DNYVPEVSALDQEIIIVDPDK.E     |
|               | HsFlag-NUFIP_Ti_10 | 5.2327 | 0.4244 | 2410.33 | 2410.791 | 6750    | 1                                                              | 1117.6 | 54.8 | 31 K.LLDFGSLSNLQVTQPTVGMNFK.T    |
| gj 58761486 r | 28                 | 109    | 56.80% | 544     | 60463    | 6.5     | chaperonin containing TCP1, subunit 3 isoform b [Homo sapiens] |        |      |                                  |
| gj 63162572 r | 28                 | 109    | 56.70% | 545     | 60534    | 6.5     | chaperonin containing TCP1, subunit 3 isoform a [Homo sapiens] |        |      |                                  |
|               | HsFLAG-ARP6_Ti_10  | 5.5292 | 0.4272 | 2132.07 | 2132.559 | 6925.4  | 1                                                              | 2173.6 | 71.1 | 4 K.MLLDPMGGIVMTNDGNAILR.E       |
|               | HsFLAG-ARP6_Ti_10  | 3.0068 | 0.092  | 1120.35 | 1121.282 | 5851.1  | 2                                                              | 742.5  | 83.3 | 6 R.EIQVQHPPAAK.S                |
|               | HsFLAG-p53-DNA-D   | 3.0572 | 0.1797 | 1120.48 | 1121.282 | 4764.2  | 1                                                              | 512.5  | 72.2 | 7 R.EIQVQHPPAAK.S                |
|               | HsFLAG-ARP5_Ti_10  | 4.1173 | 0.2849 | 1362.93 | 1363.656 | 9133.6  | 1                                                              | 1806.6 | 81.8 | 3 R.KALDDMISTLKK.I               |
|               | HsFLAG-ARP6_Ti_10  | 1.8829 | 0.0945 | 1106.26 | 1107.307 | 8193.8  | 1                                                              | 517.6  | 61.1 | 1 K.ALDDMISTLKK.K                |
|               | HsFLAG-ARP6_Ti_10  | 3.5108 | 0.2162 | 2737.33 | 2737.196 | 9500.1  | 1                                                              | 968    | 29.2 | 1 K.KISIPVDISDSMMLNIINSSITTK.A   |
|               | HsFLAG-ARP6_Ti_10  | 2.861  | 0.3269 | 2608.08 | 2609.022 | 7599.6  | 1                                                              | 473.1  | 37   | 1 K.ISIPVDISDSMMLNIINSSITTK.A    |
|               | HsFLAG-ARP6_Ti_10  | 4.8274 | 0.3265 | 1548.68 | 1548.745 | 6054.4  | 1                                                              | 1797.2 | 84.6 | 4 R.WSSLACNIALDAVK.M             |
|               | HsFLAG-ARP6_Ti_10  | 2.8361 | 0.085  | 1237.68 | 1238.404 | 7126.4  | 3                                                              | 1253.8 | 83.3 | 1 K.MVQFEENGRK.E                 |
|               | HsFLAG-ARP6_Ti_10  | 4.0507 | 0.2486 | 1430.82 | 1429.623 | 6396.9  | 1                                                              | 1700.8 | 87.5 | 4 K.IPGGIIEDSCVLR.G              |
|               | HsFLAG-ARP6_Ti_10  | 2.1911 | 0.09   | 1279.22 | 1280.504 | 7034.7  | 1                                                              | 798.1  | 65   | 1 R.IVLLDSSLEYK.K                |
|               | HsFLAG-ARP6_Ti_10  | 3.4373 | 0.2031 | 1280.17 | 1280.504 | 4311.4  | 2                                                              | 996.9  | 80   | 4 R.IVLLDSSLEYK.K                |
|               | HsFLAG-ARP5_Ti_10  | 2.7195 | 0.1848 | 2154.32 | 2155.283 | 6478.4  | 1                                                              | 376.1  | 44.1 | 1 K.KGESQTDIEITREEDFTR.I         |
|               | HsFLAG-ARP5_Ti_10  | 5.7198 | 0.4228 | 3418.4  | 3419.919 | 10536.5 | 1                                                              | 1523.9 | 30.6 | 5 R.ILQMEEYIQQLEDIIQLKPDVVITEK.G |
|               | HsFLAG-ARP6_Ti_10  | 4.1627 | 0.3574 | 1404.25 | 1404.627 | 7147.8  | 1                                                              | 1539.3 | 81.8 | 10 K.GISDLAQHYLMR.A              |
|               | HsFLAG-ARP6_Ti_10  | 4.0942 | 0.2996 | 2497.79 | 2497.808 | 6695.8  | 1                                                              | 354.7  | 36.4 | 3 R.IVSRPEELREDDVGTGAGLLEIK.K    |

|               |                    |        |        |         |          |         |   |        |      |                                                                   |
|---------------|--------------------|--------|--------|---------|----------|---------|---|--------|------|-------------------------------------------------------------------|
|               | HsFLAG-ARP5_Ti_1   | 4.9631 | 0.3494 | 2497.95 | 2497.808 | 5122.2  | 1 | 847.6  | 36.4 | 7 R.IVSRPEELREDDVGTGAGLLEIK.K                                     |
|               | HsFLAG-ARP6_Ti_1   | 5.1371 | 0.4526 | 1738.21 | 1737.913 | 6394.6  | 1 | 1921.2 | 84.6 | 15 K.KIGDEYFTFITDCK.D                                             |
|               | HsFLAG-ARP6_Ti_1   | 2.1714 | 0.1041 | 974.53  | 975.087  | 2572.9  | 5 | 190.7  | 78.6 | 1 K.EILSEVER.N                                                    |
|               | HsFLAG-ARP5_Ti_1   | 3.5163 | 0.1969 | 2619.85 | 2619.008 | 6146.5  | 5 | 597.9  | 27   | 1 R.NVLLDPQLVPGGGASEMAVAHALTEK.S                                  |
|               | HsFLAG-ARP6_Ti_1   | 3.592  | 0.3418 | 1339.76 | 1338.524 | 7991.8  | 1 | 1254   | 80   | 4 K.AMTGVEQWPYR.A                                                 |
|               | HsFLAG-ARP6_Ti_1   | 4.3318 | 0.3091 | 1168.29 | 1167.394 | 6408.7  | 2 | 1690.9 | 90   | 5 R.AVAQALEVIPR.T                                                 |
|               | HsFLAG-ARP6_Ti_1   | 3.479  | 0.2957 | 1334.08 | 1334.481 | 7277.1  | 1 | 1601.1 | 86.4 | 2 R.TLIQNCGASTIR.L                                                |
|               | HsFLAG-ARP6_Ti_1   | 3.4608 | 0.2446 | 1255.6  | 1255.5   | 3427    | 2 | 739.9  | 85   | 2 K.ELGIWEPLAVK.L                                                 |
|               | HsFLAG-ARP6_Ti_1   | 2.1967 | 0.1012 | 1185.67 | 1186.437 | 3759.1  | 1 | 351.4  | 70   | 1 K.TAVETAVLLLR.I                                                 |
|               | HsFLAG-ARP6_Ti_1   | 4.4816 | 0.2995 | 1186.47 | 1186.437 | 7872    | 1 | 2535.5 | 95   | 12 K.TAVETAVLLLR.I                                                |
|               | HsFLAG-ARP6_Ti_1   | 2.0616 | 0.2394 | 983.34  | 984.097  | 4823.8  | 1 | 530.6  | 75   | 2 R.IDDIVSGHK.K                                                   |
|               | HsFLAG-ARP5_Ti_1   | 2.8124 | 0.1249 | 1112.15 | 1112.271 | 6570.4  | 5 | 770.6  | 77.8 | 1 R.IDDIVSGHK.K                                                   |
| gi 5730065 re | 14                 | 58     | 56.70% | 247     | 28152    |         |   |        |      | 6 spindlin [Homo sapiens]                                         |
| *             | HsFlag-FLJ20643_Ti | 2.8941 | 0.3002 | 1327.39 | 1326.495 | 3889.8  | 1 | 418.1  | 62.5 | 4 R.SSVGPSKPVSQPR.R                                               |
| *             | HsFLAG-p53-DNA-D   | 4.4782 | 0.3632 | 1856.4  | 1857.2   | 3704.2  | 1 | 718    | 68.8 | 12 K.GTVLDQVPVNPSLYLIK.Y                                          |
| *             | HsFLAG-FLJ20729_   | 4.4059 | 0.3221 | 1856.92 | 1857.2   | 6652.5  | 1 | 1685.8 | 51.6 | 1 K.GTVLDQVPVNPSLYLIK.Y                                           |
| *             | HsFLAG-FLJ20729_   | 5.258  | 0.495  | 1693.27 | 1693.816 | 6606.5  | 1 | 2370.4 | 92.3 | 5 K.YDGFDCVYGLELNK.D                                              |
| *             | HsFLAG-FLJ20729_   | 4.694  | 0.3536 | 1373.36 | 1372.579 | 8526.5  | 1 | 1942.9 | 79.2 | 3 R.ISDAHLADTMIGK.A                                               |
| *             | HsFLAG-ARP5_Ti_1   | 4.7692 | 0.4268 | 2066.61 | 2067.194 | 8449.8  | 1 | 1477.7 | 65.6 | 2 K.AVEHMFETEDGSKDEWR.G                                           |
| *             | HsFLAG-FLJ20729_   | 4.2206 | 0.0812 | 1763.17 | 1764.049 | 8190.2  | 1 | 955.1  | 61.5 | 1 R.APVMNTWFYITYEK.D                                              |
|               | HsFLAG-FLJ20729_   | 5.2623 | 0.3813 | 1777.42 | 1777.042 | 6048    | 1 | 2196.4 | 84.6 | 6 K.DPVLYMYQLLDDYK.E                                              |
|               | HsFLAG-Lin9_Ti_20  | 2.7729 | 0.244  | 2346.47 | 2347.645 | 10325.5 | 3 | 474.4  | 36.1 | 1 K.DPVLYMYQLLDDYKEGDLR.I                                         |
| *             | HsFLAG-FLJ20729_   | 3.3527 | 0.1475 | 1371.45 | 1369.625 | 7551.5  | 1 | 1442.9 | 81.8 | 4 K.RTGMVIHQVEAK.P                                                |
| *             | HsFLAG-FLJ20729_   | 4.4105 | 0.3913 | 2203.43 | 2204.638 | 5837.5  | 1 | 810    | 55.6 | 2 K.RTGMVIHQVEAKPSVYFIK.F                                         |
| *             | HsFLAG-FLJ20729_   | 5.5168 | 0.3699 | 2204.28 | 2204.638 | 7492.4  | 1 | 1548.4 | 44.4 | 1 K.RTGMVIHQVEAKPSVYFIK.F                                         |
| *             | HsFLAG-FLJ20729_   | 4.4359 | 0.2894 | 2049.18 | 2048.451 | 9500.9  | 1 | 1174.3 | 52.9 | 2 R.TGMVIHQVEAKPSVYFIK.F                                          |
|               | HsFLAG-FLJ20729_   | 5.3702 | 0.4789 | 1791.37 | 1789.982 | 7785.7  | 1 | 1835.1 | 76.9 | 14 K.FDDDFHIYVYDLVK.T                                             |
| gi 29294624 r | 9                  | 72     | 55.90% | 118     | 13527    |         |   |        |      | 9.9 small nuclear ribonucleoprotein polypeptide D2 [Homo sapiens] |
| gi 4759158 re | 9                  | 72     | 55.90% | 118     | 13527    |         |   |        |      | 9.9 small nuclear ribonucleoprotein polypeptide D2 [Homo sapiens] |
|               | HsFLAG-p53-DNA-D   | 4.3461 | 0.1316 | 3337.92 | 3337.68  | 7294    | 1 | 853.6  | 27.7 | 4 K.SEMTPEELQKREEEEFNTGPLSVLTQSVK.N                               |
|               | HsFLAG-ARP6_Ti_1   | 5.1758 | 0.3938 | 2163.35 | 2164.377 | 9638.6  | 1 | 1297.9 | 38.9 | 6 K.REEEEFNTGPLSVLTQSVK.N                                         |
|               | HsFLAG-Lin9_Ti_20  | 6.4651 | 0.4694 | 2164.57 | 2164.377 | 11398.5 | 1 | 2515.9 | 66.7 | 19 K.REEEEFNTGPLSVLTQSVK.N                                        |
|               | HsFLAG-ARP6_Ti_2   | 4.3144 | 0.4691 | 2008.13 | 2008.19  | 5467.1  | 1 | 1095.2 | 64.7 | 5 R.EEEEFNTGPLSVLTQSVK.N                                          |
|               | HsFLAG-ARP6_Ti_1   | 3.785  | 0.2586 | 1232.28 | 1232.348 | 7949.9  | 1 | 1537.1 | 88.9 | 3 K.NNTQVLINCR.N                                                  |
|               | HsFLAG-ARP6_Ti_1   | 2.5356 | 0.1438 | 1243.3  | 1244.417 | 4820.5  | 1 | 560.6  | 72.2 | 1 R.HCNMVLENVK.E                                                  |
|               | HsFLAG-ARP6_Ti_1   | 4.1711 | 0.3512 | 1244.21 | 1244.417 | 7134.8  | 1 | 1564.3 | 88.9 | 16 R.HCNMVLENVK.E                                                 |
|               | HsFLAG-ARP6_Ti_1   | 3.1179 | 0.1141 | 1329.29 | 1329.603 | 4750.7  | 3 | 738.1  | 72.2 | 4 K.DRYISKMFLR.G                                                  |
|               | HsFLAG-p53-DNA-D   | 2.5562 | 0.1004 | 712.45  | 712.867  | 4071.3  | 4 | 499.9  | 83.3 | 14 R.NPLIAGK.-                                                    |
| gi 19924159 r | 40                 | 631    | 55.70% | 535     | 59832    |         |   |        |      | 5 RPB5-mediating protein isoform a [Homo sapiens]                 |
| gi 19924161 r | 40                 | 631    | 60.20% | 495     | 55584    |         |   |        |      | 5.2 RPB5-mediating protein isoform b [Homo sapiens]               |
|               | HsFlag-ZnF-HIT2_Ti | 2.5913 | 0.083  | 1207.57 | 1208.316 | 4944.5  | 1 | 605    | 77.8 | 5 K.KVDNDYNALR.E                                                  |
|               | HsFLAG-p53-DNA-D   | 4.0338 | 0.2188 | 1208.46 | 1208.316 | 5440.9  | 1 | 1266   | 94.4 | 15 K.KVDNDYNALR.E                                                 |
|               | HsFlag-NUFIP_Ti_1C | 4.3596 | 0.2955 | 2017.72 | 2017.454 | 3686.8  | 1 | 475.8  | 55.9 | 14 K.LSYNIMVFPFGPFAMPGK.L                                         |

|                     |        |        |         |          |         |   |        |      |     |                                                         |
|---------------------|--------|--------|---------|----------|---------|---|--------|------|-----|---------------------------------------------------------|
| HsFLAG-p53-DNA-D    | 4.7265 | 0.2031 | 2056.48 | 2057.357 | 4691.5  | 7 | 810.9  | 41.2 | 29  | K.LVHTNEVTVLLGDNWFPAK.C                                 |
| HsFLAG-UTX1_Ti_2    | 6.6072 | 0.4799 | 2057.43 | 2057.357 | 8346.1  | 1 | 2477   | 76.5 | 69  | K.LVHTNEVTVLLGDNWFPAK.C                                 |
| HsFlag-NUFIP_Ti_1C  | 1.9445 | 0.2043 | 1008.63 | 1009.153 | 2166.9  | 6 | 98.6   | 68.8 | 1   | K.QAVGLVEHR.K                                           |
| HsFlag-NUFIP_Ti_1C  | 3.136  | 0.1761 | 1009.26 | 1009.153 | 2683.3  | 2 | 310    | 81.2 | 17  | K.QAVGLVEHR.K                                           |
| HsFlag-FLJ20643_Ti  | 2.2579 | 0.2127 | 1108.55 | 1109.221 | 7687.9  | 7 | 585.9  | 68.8 | 1   | R.VFTEDLQK.M                                            |
| HsFlag-FLJ20643_Ti  | 2.986  | 0.2233 | 1110.89 | 1109.221 | 3707.4  | 2 | 624.6  | 87.5 | 1   | R.VFTEDLQK.M                                            |
| HsFLAG-p53-DNA-D    | 4.2521 | 0.3569 | 1263.16 | 1263.408 | 7584.7  | 1 | 2234.5 | 90.9 | 2   | K.MSDAAGDIVDIR.E                                        |
| HsFLAG-p53-DNA-D    | 5.0434 | 0.3953 | 1762.01 | 1762.973 | 8797.5  | 1 | 1923   | 73.3 | 15  | K.MSDAAGDIVDIREIK.C                                     |
| HsFLAG-RPB5MP_2     | 2.5082 | 0.1891 | 1345.37 | 1345.458 | 5736.3  | 1 | 687.8  | 77.8 | 1   | R.EEIKCDFEFK.A                                          |
| HsFLAG-p53-DNA-D    | 4.0559 | 0.3696 | 1537.45 | 1538.651 | 7296.2  | 1 | 994.5  | 65.4 | 8   | K.TSDIFEADIANDVK.S                                      |
| HsFlag-NUFIP_Ti_1C  | 5.2947 | 0.3499 | 1538.36 | 1538.651 | 6987.8  | 1 | 1776.4 | 80.8 | 120 | K.TSDIFEADIANDVK.S                                      |
| HsFlag-NUFIP_Ti_1C  | 6.06   | 0.3875 | 4334    | 4335.544 | 5926.7  | 1 | 1426.6 | 29.1 | 12  | R.LEELERQEELLGELDSKPDVTIANGEDTTSSEEEKEDR.N              |
| HsFLAG-TIP49a_Ti_   | 4.8873 | 0.4327 | 2191.49 | 2192.337 | 6655.2  | 1 | 1412.7 | 63.9 | 14  | R.NTNVNMAMHQVTDSTPCHK.D                                 |
| HsFlag-ZnF-HIT2_Ti_ | 4.6103 | 0.1818 | 2192.22 | 2192.337 | 8178.9  | 1 | 1489.2 | 41.7 | 14  | R.NTNVNMAMHQVTDSTPCHK.D                                 |
| HsFLAG-BC014022_    | 4.419  | 0.3201 | 1784.4  | 1783.939 | 10806.4 | 1 | 2042   | 62.5 | 2   | R.KNSTGSGHSAQELPTIR.T                                   |
| HsFlag-FLJ20643_Ti  | 4.733  | 0.4376 | 1656.1  | 1655.765 | 8175.7  | 1 | 1654.1 | 66.7 | 31  | K.NSTGSGHSAQELPTIR.T                                    |
| HsFLAG-RPB5MP_2     | 3.6021 | 0.2717 | 1656.7  | 1655.765 | 5184.7  | 2 | 763    | 40   | 2   | K.NSTGSGHSAQELPTIR.T                                    |
| HsFLAG-p53-DNA-D    | 2.3308 | 0.1551 | 835.56  | 835.935  | 2189    | 6 | 143    | 75   | 1   | R.TPADIYR.A                                             |
| HsFlag-FLJ20643_Ti  | 2.5176 | 0.1795 | 837.56  | 835.935  | 4602.2  | 7 | 661.8  | 91.7 | 1   | R.TPADIYR.A                                             |
| HsFLAG-p53-DNA-D    | 4.8479 | 0.2938 | 1464.77 | 1465.649 | 7170.4  | 1 | 1963.2 | 83.3 | 43  | R.AFVDVVNGEYVPR.K                                       |
| HsFLAG-p53-DNA-D    | 2.9424 | 0.2027 | 1465.69 | 1465.649 | 3505.1  | 9 | 274.7  | 54.2 | 2   | R.AFVDVVNGEYVPR.K                                       |
| HsFlag-FLJ20643_Ti  | 3.0431 | 0.1934 | 1594.8  | 1593.823 | 9256.4  | 1 | 891.9  | 61.5 | 1   | R.AFVDVVNGEYVPRK.S                                      |
| HsFLAG-TIP49a_Ti_   | 5.0555 | 0.4593 | 2350.57 | 2350.294 | 4387.2  | 1 | 773.9  | 60   | 15  | R.SRENSVCSDTSESSAAEFDDR.R                               |
| HsFlag-FLJ20643_Ti  | 4.8374 | 0.4046 | 2350.63 | 2350.294 | 8840.8  | 1 | 1352.8 | 36.2 | 4   | R.SRENSVCSDTSESSAAEFDDR.R                               |
| HsFlag-FLJ20643_Ti  | 3.7523 | 0.3386 | 2507.77 | 2506.482 | 6700.5  | 6 | 528.6  | 29.8 | 2   | R.SRENSVCSDTSESSAAEFDDR.R                               |
| HsFlag-NUFIP_Ti_1C  | 5.3945 | 0.5477 | 2106.57 | 2107.028 | 10810.9 | 1 | 2097.9 | 61.1 | 22  | R.ENSVCSDTSESSAAEFDDR.R                                 |
| HsFlag-NUFIP_Ti_1C  | 5.0862 | 0.434  | 3002.07 | 3002.012 | 8747    | 1 | 1443.4 | 46   | 34  | R.SISCEEATCSDTSESILEEPPQENQK.K                          |
| HsFlag-FLJ20643_Ti  | 5.9306 | 0.2663 | 3002.4  | 3002.012 | 7050.1  | 1 | 818.5  | 31   | 9   | R.SISCEEATCSDTSESILEEPPQENQK.K                          |
| HsFlag-FLJ20643_Ti  | 3.6281 | 0.3039 | 3129.97 | 3130.186 | 5902.6  | 1 | 790.9  | 29.8 | 1   | R.SISCEEATCSDTSESILEEPPQENQK.L                          |
| HsFLAG-p53-DNA-D    | 5.5797 | 0.4128 | 2029.25 | 2030.412 | 5996.5  | 1 | 1604.6 | 72.2 | 39  | K.KLLPLSVTPEAFSGTVIEK.E                                 |
| HsFlag-NUFIP_Ti_1C  | 6.2192 | 0.3748 | 2030.07 | 2030.412 | 8184.3  | 1 | 2747.3 | 51.4 | 17  | K.KLLPLSVTPEAFSGTVIEK.E                                 |
| HsFlag-NUFIP_Ti_1C  | 4.1309 | 0.3716 | 1903.32 | 1902.238 | 4721    | 1 | 501.9  | 55.9 | 23  | K.LLPLSVTPEAFSGTVIEK.E                                  |
| HsFLAG-RPB5MP_2     | 4.528  | 0.3561 | 1903.44 | 1902.238 | 8724.6  | 1 | 1861.6 | 45.6 | 3   | K.LLPLSVTPEAFSGTVIEK.E                                  |
| HsFlag-NUFIP_Ti_11  | 4.9289 | 0.4402 | 2537.62 | 2538.949 | 5044.5  | 1 | 719.6  | 33.7 | 6   | K.EFVSPSLTPPPAIAHPALPTIPER.K                            |
| HsFlag-NUFIP_Ti_11  | 4.1478 | 0.356  | 2538.11 | 2538.949 | 4462.9  | 1 | 334    | 39.1 | 5   | K.EFVSPSLTPPPAIAHPALPTIPER.K                            |
| HsFLAG-RPB5MP_2     | 3.3038 | 0.2821 | 1304.34 | 1305.425 | 4030.4  | 1 | 431.8  | 68.2 | 3   | K.EVLLEASEETGK.R                                        |
| HsFlag-NUFIP_Ti_1C  | 4.1917 | 0.2487 | 1305.56 | 1305.425 | 6814    | 1 | 1262.5 | 81.8 | 27  | K.EVLLEASEETGK.R                                        |
| gij 7706753 re      | 15     | 62     | 55.60%  | 329      | 37607   |   |        |      |     | 5.3 ubiquitin C-terminal hydrolase UCH37 [Homo sapiens] |
| HsFLAG-ARP8_Ti_2    | 2.8672 | 0.2732 | 2587.71 | 2586.9   | 6951.5  | 1 | 615.1  | 38.6 | 1   | -.MTGNAGEWCLMESDPGVFTELIK.G                             |
| HsFLAG-TCF3_Ti_1C   | 4.7238 | 0.2691 | 2006.7  | 2006.176 | 6493.1  | 1 | 882.5  | 59.4 | 15  | R.GAQVEEISLEPENFEK.L                                    |
| HsFLAG-TCF3_Ti_1C   | 4.5253 | 0.3769 | 3809.9  | 3812.204 | 6996.4  | 1 | 666.9  | 24.2 | 7   | K.QVINNACATQAIVSLLNCTHQDVHLGETLSEFK.E                   |
| HsFLAG-ARP5_Ti_1C   | 2.5752 | 0.1322 | 1145.06 | 1145.301 | 7084.9  | 5 | 688    | 70   | 1   | K.GLALSNSDVIR.Q                                         |
| HsFLAG-TCF3_Ti_1C   | 2.1377 | 0.1934 | 1145.59 | 1145.301 | 3437.5  | 7 | 133.6  | 55   | 1   | K.GLALSNSDVIR.Q                                         |

|               |                    |        |        |         |          |         |   |        |      |                                                                                   |
|---------------|--------------------|--------|--------|---------|----------|---------|---|--------|------|-----------------------------------------------------------------------------------|
|               | HsFlag-FLJ90652_2  | 2.2147 | 0.0991 | 1172.51 | 1174.314 | 2957.7  | 2 | 213.4  | 62.5 | 1 R.QQMFEDTK.T                                                                    |
|               | HsFLAG-TCF3_Ti_1   | 5.2147 | 0.4942 | 2253.75 | 2254.464 | 6435.8  | 1 | 1179.6 | 57.9 | 2 K.TSAKEEDAFHFVSYVPVNGR.L                                                        |
|               | HsFLAG-FLJ20309_   | 3.8171 | 0.3131 | 1867.35 | 1867.028 | 8062.6  | 1 | 1270.4 | 60   | 3 K.EEDAFHFVSYVPVNGR.L                                                            |
|               | HsFLAG-TCF3_Ti_1   | 2.2815 | 0.1374 | 978.65  | 979.121  | 5029.1  | 4 | 448    | 78.6 | 1 R.LYELDGLR.E                                                                    |
|               | HsFlag-FLJ90652_2  | 4.5321 | 0.2868 | 3643.51 | 3644.042 | 9538.5  | 1 | 908.9  | 25.8 | 2 R.LYELDGLREGPIDLGACNQDDWISAVRPVIEK.R                                            |
|               | HsFLAG-ARP8_Ti_2   | 4.1462 | 0.3228 | 2682.72 | 2683.944 | 8090.7  | 1 | 720.8  | 39.1 | 5 R.EGPIDLGACNQDDWISAVRPVIEK.R                                                    |
|               | HsFLAG-TIP49a_Ti_  | 3.9048 | 0.2374 | 2684.52 | 2683.944 | 4078.8  | 1 | 730.6  | 35.9 | 2 R.EGPIDLGACNQDDWISAVRPVIEK.R                                                    |
|               | HsFLAG-TCF3_Ti_1   | 3.3052 | 0.1958 | 1294.59 | 1294.555 | 7963.6  | 1 | 1509.7 | 80   | 4 R.FNLMAIVSDRK.M                                                                 |
|               | HsFLAG-TCF3_Ti_1   | 4.0582 | 0.3438 | 1519.59 | 1518.857 | 5513.5  | 1 | 1143.6 | 81.8 | 10 K.HNYLPPFIMELLK.T                                                              |
|               | HsFlag-FLJ90652_2  | 4.1525 | 0.1294 | 1619.39 | 1619.902 | 4913.1  | 1 | 869.3  | 73.1 | 7 K.TLAEHQQLIPLVEK.A                                                              |
| gij24638446 r | 6                  | 92     | 55.00% | 129     | 13988    |         |   |        |      | 10.9 H2A histone family, member Q [Homo sapiens]                                  |
| gij88943487 r | 6                  | 92     | 54.60% | 130     | 14095    |         |   |        |      | 10.9 PREDICTED: similar to Histone H2A.o (H2A/o) (H2A.2) (H2a-615) [Homo sapiens] |
|               | HsFLAG-p53-DNA-D   | 3.1573 | 0.1473 | 944.77  | 945.109  | 5816.4  | 2 | 976.3  | 87.5 | 4 R.AGLQFPVGR.V                                                                   |
|               | HsFLAG-Lin9_Ti_20  | 4.9776 | 0.3338 | 2934.24 | 2935.408 | 10020.2 | 1 | 1226.7 | 30.4 | 6 R.VGAGAPVYMAAVLEYLTAEILELAGNAAR.D                                               |
|               | HsFLAG-ARP8_Ti_2   | 5.5206 | 0.2936 | 2935.44 | 2935.408 | 7841.9  | 1 | 1343.7 | 42.9 | 5 R.VGAGAPVYMAAVLEYLTAEILELAGNAAR.D                                               |
|               | HsFLAG-ARP6_Ti_1   | 4.029  | 0.2972 | 1693.82 | 1693.9   | 8806.2  | 2 | 1211.8 | 69.2 | 9 R.HLQLAIRNDEELNK.L                                                              |
|               | HsFlag-NUFIP_Ti_1  | 5.3135 | 0.4282 | 1931.78 | 1932.357 | 4289.2  | 1 | 956.2  | 66.7 | 62 K.VTIAQGGVLPNIQAVLLPK.K                                                        |
|               | HsFLAG-Lin9_Ti_20  | 5.2747 | 0.3488 | 1931.88 | 1932.357 | 8773.2  | 1 | 2498.1 | 50   | 6 K.VTIAQGGVLPNIQAVLLPK.K                                                         |
| gij4506439 re | 14                 | 43     | 54.80% | 425     | 47820    |         |   |        |      | 5 retinoblastoma binding protein 7 [Homo sapiens]                                 |
| *             | HsFLAG-p53-DNA-D   | 5.3976 | 0.4159 | 3839.8  | 3841.46  | 7901.1  | 1 | 751.8  | 24.2 | 1 K.NTPFLYDLVMTHALQWPSLTVQWLPEVTKPEGK.D                                           |
| *             | HsFLAG-Lin9_Ti_20  | 3.3002 | 0.2334 | 1143.12 | 1143.241 | 8818.1  | 1 | 1157.9 | 72.7 | 1 K.GEFGGFGSVTGK.I                                                                |
| *             | HsFlag-NUFIP_Ti_2  | 2.744  | 0.2028 | 1413.53 | 1413.678 | 5332.3  | 1 | 517    | 68.2 | 2 R.YMPQNPHIATK.T                                                                 |
|               | HsSrcap_Ti_203.235 | 3.002  | 0.3428 | 1472.37 | 1472.635 | 4836.8  | 1 | 486.8  | 62.5 | 7 K.TPSSDVLVFDYTK.H                                                               |
|               | HsFLAG-Lin9_Ti_20  | 4.3366 | 0.3815 | 1473.5  | 1472.635 | 7851    | 1 | 1516.2 | 75   | 9 K.TPSSDVLVFDYTK.H                                                               |
| *             | HsFLAG-Lin9_Ti_20  | 2.7812 | 0.2549 | 1789.97 | 1790.896 | 6775.9  | 1 | 422.9  | 46.7 | 2 K.HPAKPDPSGECNPDRL.L                                                            |
| *             | HsFlag-VPS71_Ti_1  | 4.5965 | 0.3634 | 3715.39 | 3715.981 | 10285.4 | 1 | 1093.2 | 25   | 3 K.EGYGLSWNSNLGHLSSASDDHTVCLWDINAGPK.E                                           |
| *             | HsSrcap_Ti_206.319 | 7.0758 | 0.5566 | 3380.87 | 3380.741 | 8604.6  | 1 | 1575.8 | 32.5 | 3 K.AIFTGHSVVEDVAWHLLHESLFGSVADDQK.L                                              |
| *             | HsSrcap_Ti_205.325 | 5.6947 | 0.4984 | 4111.79 | 4111.434 | 8370.4  | 1 | 1223.1 | 25   | 4 R.SNTTSKPSHLVDAHTAEVNCLSFNPYSEFILATGSADK.T                                      |
|               | HsFLAG-Lin9_Ti_20  | 2.7344 | 0.0828 | 973.28  | 974.148  | 3249.6  | 3 | 701.2  | 85.7 | 1 K.TVALWDLR.N                                                                    |
|               | HsSrcap_Ti_205.221 | 2.7488 | 0.1048 | 1131.52 | 1131.32  | 4440.3  | 3 | 625    | 81.2 | 1 R.RLNVDLSK.I                                                                    |
|               | HsFLAG-Lin9_Ti_20  | 2.8604 | 0.1205 | 975.25  | 975.133  | 4581    | 5 | 882.6  | 92.9 | 1 R.LNVWDLK.I                                                                     |
| *             | HsSrcap_Ti_203.225 | 5.2256 | 0.3197 | 2848.85 | 2849.04  | 8887.2  | 1 | 1737.3 | 33.7 | 6 K.IGEEQSAEDAEDGPPPELLFIHGHTAK.I                                                 |
| *             | HsFlag-VPS71_Ti_1  | 4.4434 | 0.3821 | 2848.92 | 2849.04  | 4160.8  | 1 | 520    | 42.3 | 2 K.IGEEQSAEDAEDGPPPELLFIHGHTAK.I                                                 |
| gij10800130 r | 6                  | 89     | 54.60% | 130     | 14107    |         |   |        |      | 10.9 histone 1, H2ad [Homo sapiens]                                               |
| gij4504243 re | 6                  | 89     | 54.60% | 130     | 14091    |         |   |        |      | 10.9 H2A histone family, member I [Homo sapiens]                                  |
| gij4504241 re | 6                  | 89     | 54.60% | 130     | 14091    |         |   |        |      | 10.9 H2A histone family, member D [Homo sapiens]                                  |
| gij4504239 re | 6                  | 89     | 54.60% | 130     | 14091    |         |   |        |      | 10.9 H2A histone family, member C [Homo sapiens]                                  |
| gij29553970 r | 6                  | 89     | 55.00% | 129     | 14019    |         |   |        |      | 10.9 H2A histone family, member J isoform 2 [Homo sapiens]                        |
| gij18105045 r | 6                  | 89     | 55.50% | 128     | 13906    |         |   |        |      | 10.9 H2A histone family member [Homo sapiens]                                     |
| gij10800144 r | 6                  | 89     | 55.50% | 128     | 13936    |         |   |        |      | 10.9 H2A histone family, member E [Homo sapiens]                                  |
| gij10800132 r | 6                  | 89     | 54.60% | 130     | 14091    |         |   |        |      | 10.9 H2A histone family, member P [Homo sapiens]                                  |
|               | HsFLAG-p53-DNA-D   | 3.1573 | 0.1473 | 944.77  | 945.109  | 5816.4  | 2 | 976.3  | 87.5 | 4 R.AGLQFPVGR.V                                                                   |
|               | HsFLAG-Lin9_Ti_20  | 5.4913 | 0.4094 | 2916.83 | 2917.375 | 9478.7  | 1 | 1610.8 | 32.1 | 3 R.VGAGAPVYLAHVLEYLTAEILELAGNAAR.D                                               |

|               |                      |        |        |         |          |         |                                                                                               |        |      |    |                                   |
|---------------|----------------------|--------|--------|---------|----------|---------|-----------------------------------------------------------------------------------------------|--------|------|----|-----------------------------------|
|               | HsFLAG-Lin9_Ti_20    | 5.6884 | 0.3714 | 2917.12 | 2917.375 | 9129.3  | 1                                                                                             | 1489.7 | 42.9 | 5  | R.VGAGAPVYLAHVLEYLTAEILELAGNAAR.D |
|               | HsFLAG-ARP6_Ti_1     | 4.029  | 0.2972 | 1693.82 | 1693.9   | 8806.2  | 2                                                                                             | 1211.8 | 69.2 | 9  | R.HLQLAIRNDEELNK.L                |
|               | HsFlag-NUFIP_Ti_1C   | 5.3135 | 0.4282 | 1931.78 | 1932.357 | 4289.2  | 1                                                                                             | 956.2  | 66.7 | 62 | K.VTIAQGGVLPNIQAVLLPK.K           |
|               | HsFLAG-Lin9_Ti_20    | 5.2747 | 0.3488 | 1931.88 | 1932.357 | 8773.2  | 1                                                                                             | 2498.1 | 50   | 6  | K.VTIAQGGVLPNIQAVLLPK.K           |
| gi 5902102 re | 8                    | 175    | 54.60% | 119     | 13282    | 11.6    | small nuclear ribonucleoprotein D1 polypeptide 16kDa [Homo sapiens]                           |        |      |    |                                   |
| *             | HsFlag-VPS71_Ti_1C   | 2.5117 | 0.1204 | 1269.6  | 1270.469 | 6351    | 8                                                                                             | 641.6  | 65   | 1  | K.LSHETVTIELK.N                   |
| *             | HsFLAG-Lin9_Ti_20    | 3.2154 | 0.2776 | 1270.26 | 1270.469 | 5667    | 1                                                                                             | 682.3  | 75   | 3  | K.LSHETVTIELK.N                   |
| *             | HsFlag-NUFIP_Ti_1C   | 3.9711 | 0.373  | 2210.03 | 2210.47  | 9044.3  | 1                                                                                             | 1213.2 | 52.5 | 6  | K.NGTQVHGTITGVDVSMNTHLK.A         |
| *             | HsFlag-NUFIP_Ti_1C   | 5.0796 | 0.3573 | 2211.47 | 2210.47  | 6656.6  | 1                                                                                             | 1103.3 | 38.8 | 6  | K.NGTQVHGTITGVDVSMNTHLK.A         |
| *             | HsFlag-ZnF-HIT2_Ti_1 | 4.4214 | 0.3546 | 1555.71 | 1555.775 | 6171.3  | 1                                                                                             | 1358.4 | 83.3 | 40 | K.NREPVQLETLSIR.G                 |
| *             | HsFlag-NUFIP_Ti_1C   | 5.1129 | 0.2958 | 1556.15 | 1555.775 | 8925.8  | 1                                                                                             | 2112.1 | 56.2 | 10 | K.NREPVQLETLSIR.G                 |
| *             | HsFlag-NUFIP_Ti_1C   | 5.1195 | 0.3716 | 2289.17 | 2288.686 | 4438.5  | 1                                                                                             | 1027.9 | 65.8 | 99 | R.YFILPDSLPLDILLVDVEPK.V          |
| *             | HsFlag-VPS71_Ti_1C   | 6.1435 | 0.4091 | 2289.38 | 2288.686 | 6737.1  | 1                                                                                             | 1628.8 | 44.7 | 10 | R.YFILPDSLPLDILLVDVEPK.V          |
| gi 5803225 re | 14                   | 78     | 54.50% | 255     | 29174    | 4.7     | tyrosine 3/tryptophan 5 -monooxygenase activation protein, epsilon polypeptide [Homo sapiens] |        |      |    |                                   |
| *             | HsFLAG-ARP6_Ti_1     | 3.8503 | 0.3213 | 1929.29 | 1930.155 | 8610.2  | 1                                                                                             | 1274.8 | 60   | 1  | K.LAEQAERYDEMVESMK.K              |
|               | HsFlag-FLJ90652_2    | 3.101  | 0.3096 | 1417.73 | 1418.587 | 7329.8  | 2                                                                                             | 830.2  | 72.7 | 2  | R.IISSIEQKEENK.G                  |
| *             | HsFLAG-ARP6_Ti_1     | 3.6955 | 0.318  | 1237.5  | 1238.386 | 4414.5  | 1                                                                                             | 831.7  | 77.3 | 7  | K.HLIPAANTGESK.V                  |
| *             | HsFLAG-p53-DNA-D     | 3.2679 | 0.2547 | 1238.42 | 1238.386 | 3579.2  | 1                                                                                             | 1017   | 86.4 | 16 | K.HLIPAANTGESK.V                  |
|               | HsFLAG-ARP6_Ti_1     | 3.4271 | 0.2191 | 1386.02 | 1385.519 | 7928.6  | 1                                                                                             | 1148.7 | 72.7 | 2  | R.YLAEFATGNDRK.E                  |
| *             | HsFLAG-p53-DNA-D     | 2.4105 | 0.1077 | 1194.4  | 1195.315 | 5001.9  | 4                                                                                             | 328.3  | 65   | 1  | K.EAAENSLVAYK.A                   |
| *             | HsFlag-FLJ90652_2    | 3.2196 | 0.2421 | 1195.09 | 1195.315 | 6866.9  | 1                                                                                             | 839    | 75   | 1  | K.EAAENSLVAYK.A                   |
| *             | HsFLAG-ARP6_Ti_1     | 4.6759 | 0.4057 | 1821.34 | 1821.102 | 4163.6  | 1                                                                                             | 668.5  | 62.5 | 10 | K.AASDIAMTELPPTHPIR.L             |
| *             | HsFLAG-ARP6_Ti_2     | 5.3451 | 0.4823 | 2088.55 | 2089.217 | 6348.7  | 1                                                                                             | 1865.5 | 72.2 | 29 | K.AAFDDAIAELDTLSEESYK.D           |
| *             | HsFLAG-ARP6_Ti_1     | 4.6625 | 0.4355 | 2089.85 | 2089.217 | 6451.8  | 1                                                                                             | 1311.3 | 45.8 | 1  | K.AAFDDAIAELDTLSEESYK.D           |
|               | HsFLAG-FLJ20729_     | 3.7624 | 0.1371 | 1189.5  | 1190.444 | 6163.6  | 5                                                                                             | 1616.1 | 88.9 | 2  | K.DSTLIMQLLR.D                    |
|               | HsMRGBP-FLAG_Ti_1    | 4.1108 | 0.4192 | 2181.97 | 2182.28  | 7316.2  | 1                                                                                             | 1521.9 | 63.9 | 4  | R.DNLTLLWTSMDMQGDGEEQNK.E         |
| *             | HsFLAG-p53-DNA-D     | 3.1464 | 0.1944 | 1289.37 | 1290.283 | 9428.4  | 2                                                                                             | 892.3  | 65   | 1  | K.EALQDVEDENQ.-                   |
| *             | HsFLAG-ARP6_Ti_1     | 2.6871 | 0.0972 | 1291.13 | 1290.283 | 4381.8  | 2                                                                                             | 444.9  | 70   | 1  | K.EALQDVEDENQ.-                   |
| gi 4506597 re | 8                    | 27     | 54.50% | 165     | 17819    | 9.4     | ribosomal protein L12 [Homo sapiens]                                                          |        |      |    |                                   |
|               | HsFLAG-TCF3_Ti_1C    | 2.2908 | 0.2739 | 1418.45 | 1419.541 | 3634.9  | 1                                                                                             | 222.4  | 50   | 1  | R.CTGGEVGATSALAPK.I               |
|               | HsFLAG-TCF3_Ti_1C    | 4.2628 | 0.3386 | 1421.46 | 1419.541 | 5559    | 1                                                                                             | 1385.8 | 78.6 | 1  | R.CTGGEVGATSALAPK.I               |
|               | HsFLAG-ARP6_Ti_1     | 2.9745 | 0.223  | 882.05  | 882.091  | 3638.3  | 9                                                                                             | 553.6  | 81.2 | 4  | K.IGPLGLSPK.K                     |
|               | HsFLAG-TCF3_Ti_1C    | 3.8996 | 0.1691 | 1667.64 | 1667.987 | 5306.7  | 8                                                                                             | 570    | 60   | 1  | R.QAQIEVVPASALIIK.A               |
| *             | HsFLAG-ARP6_Ti_1     | 4.141  | 0.1386 | 1686.02 | 1686.865 | 7437.1  | 2                                                                                             | 1436   | 46.4 | 2  | K.HSGNITFDEIVNIAR.Q               |
| *             | HsFLAG-TCF3_Ti_1C    | 5.2958 | 0.4736 | 1687.08 | 1686.865 | 7111.1  | 1                                                                                             | 2078.3 | 85.7 | 12 | K.HSGNITFDEIVNIAR.Q               |
|               | HsFLAG-Lin9_Ti_20    | 3.7379 | 0.4533 | 1676.49 | 1676.79  | 6346.9  | 1                                                                                             | 1179.6 | 70   | 4  | K.EILGTAQSVGCNVDGR.H              |
|               | HsFLAG-ARP6_Ti_1     | 4.759  | 0.4884 | 2046.53 | 2048.139 | 6633.9  | 1                                                                                             | 1161.9 | 61.1 | 2  | R.HPHDIIDDINSGAVECPAS.-           |
| gi 31542947 r | 27                   | 130    | 54.10% | 573     | 61055    | 5.9     | chaperonin [Homo sapiens]                                                                     |        |      |    |                                   |
| gi 41399285 r | 27                   | 130    | 54.10% | 573     | 61055    | 5.9     | chaperonin [Homo sapiens]                                                                     |        |      |    |                                   |
|               | HsFLAG-p53-DNA-D     | 5.5338 | 0.4996 | 2113.48 | 2114.567 | 10660.5 | 1                                                                                             | 1523.5 | 55   | 8  | R.ALMLQGVDLLADAVAVTMGPK.G         |
|               | HsFLAG-ARP6_Ti_1     | 5.391  | 0.4548 | 2114.33 | 2114.567 | 9059.4  | 1                                                                                             | 2358.5 | 43.8 | 6  | R.ALMLQGVDLLADAVAVTMGPK.G         |
|               | HsFlag-NUFIP_Ti_1C   | 6.1214 | 0.3765 | 2561.08 | 2561.722 | 8966    | 1                                                                                             | 1820.6 | 54.2 | 4  | K.LVQDVANNTNEEAGDGTATTATVLAR.S    |
|               | HsFLAG-ARP5_Ti_1     | 3.6681 | 0.1764 | 1585.75 | 1585.946 | 8117.6  | 2                                                                                             | 1043.3 | 60.7 | 3  | R.RGVMLAVDAVIAELK.K               |

|                    |        |        |         |          |         |                                                                     |        |      |                                     |
|--------------------|--------|--------|---------|----------|---------|---------------------------------------------------------------------|--------|------|-------------------------------------|
| HsFLAG-ARP6_Ti_1   | 4.3822 | 0.4648 | 2384.79 | 2385.634 | 6086.1  | 1                                                                   | 549.6  | 43.2 | 2 K.QSKPVTTPPEIAQVATISANGDK.E       |
| HsFLAG-ARP6_Ti_1   | 4.446  | 0.2934 | 1505.12 | 1505.724 | 7336.5  | 1                                                                   | 1719.1 | 79.2 | 5 K.TLNDELEIIEGMK.F                 |
| HsFLAG-ARP6_Ti_1   | 2.955  | 0.2332 | 1389.99 | 1390.579 | 5399.6  | 1                                                                   | 934.5  | 72.7 | 1 R.GYISPYFINTSK.G                  |
| HsFLAG-TCF3_Ti_1   | 3.0129 | 0.253  | 1390.53 | 1390.579 | 5715.8  | 1                                                                   | 465    | 59.1 | 1 R.GYISPYFINTSK.G                  |
| HsFLAG-ARP6_Ti_1   | 4.7779 | 0.4626 | 1602.37 | 1602.747 | 6952    | 1                                                                   | 1624   | 79.2 | 6 K.CEFQDAYVLLSEK.K                 |
| HsFlag-NUFIP_Ti_11 | 6.3387 | 0.4166 | 2048.6  | 2048.393 | 7295.1  | 1                                                                   | 1867.2 | 48.6 | 4 K.KISSIQSIVPALEIANAHR.K           |
| HsFLAG-ARP6_Ti_1   | 5.8646 | 0.4263 | 2048.6  | 2048.393 | 4692.3  | 1                                                                   | 1375.4 | 75   | 7 K.KISSIQSIVPALEIANAHR.K           |
| HsFLAG-ARP6_Ti_1   | 4.7559 | 0.4779 | 1920.15 | 1920.219 | 3775.1  | 1                                                                   | 755.6  | 64.7 | 3 K.ISSIQSIVPALEIANAHR.K            |
| HsFLAG-p53-DNA-D   | 4.4083 | 0.3058 | 1921.07 | 1920.219 | 6857.7  | 1                                                                   | 1290.5 | 44.1 | 4 K.ISSIQSIVPALEIANAHR.K            |
| HsFLAG-ARP6_Ti_1   | 3.924  | 0.2068 | 2366.53 | 2366.761 | 11581.3 | 2                                                                   | 1250.7 | 32.1 | 6 R.KPLVIAEDVDGEALSTLVLR.L          |
| HsFLAG-ARP6_Ti_1   | 6.6853 | 0.5385 | 2367.1  | 2366.761 | 6873.3  | 1                                                                   | 2390.4 | 69   | 4 R.KPLVIAEDVDGEALSTLVLR.L          |
| HsFLAG-p53-DNA-D   | 2.2311 | 0.1462 | 912.56  | 913.148  | 6590.4  | 6                                                                   | 527.8  | 68.8 | 1 K.VGLQVVAVK.A                     |
| HsFLAG-p53-DNA-D   | 2.769  | 0.13   | 962.29  | 962.053  | 7646.4  | 1                                                                   | 799.3  | 81.2 | 2 K.APGFGDNRK.N                     |
| HsFLAG-TCF3_Ti_1   | 2.0758 | 0.1639 | 844.48  | 845.027  | 8364.9  | 4                                                                   | 683    | 78.6 | 3 K.VGEVIVTK.D                      |
| HsFLAG-ARP6_Ti_1   | 4.3579 | 0.2713 | 1633.24 | 1631.968 | 6391.5  | 1                                                                   | 1478.3 | 75   | 2 K.VGEVIVTKDAMLLK.G                |
| HsFLAG-ARP6_Ti_1   | 4.1842 | 0.445  | 2194.02 | 2195.431 | 8786.1  | 1                                                                   | 746    | 47.1 | 6 K.RIQEIQQLDVTTSEYEK.E             |
| HsFLAG-ARP6_Ti_1   | 4.1095 | 0.3238 | 2195.95 | 2195.431 | 9109.3  | 1                                                                   | 1744.8 | 41.2 | 4 K.RIQEIQQLDVTTSEYEK.E             |
| HsH2AZ-FLAG_293_   | 3.5566 | 0.3636 | 1234    | 1234.306 | 6514.6  | 1                                                                   | 1079.5 | 77.3 | 7 K.VGGTSDVEVNEK.K                  |
| HsFLAG-p53-DNA-D   | 4.2411 | 0.3519 | 1685.82 | 1685.927 | 8740.4  | 1                                                                   | 1960.6 | 68.8 | 1 R.AAVEEGIVLGGGCALLR.C             |
| HsFLAG-ARP6_Ti_2   | 3.9088 | 0.3224 | 1773.36 | 1772.916 | 6085.9  | 1                                                                   | 985.8  | 66.7 | 3 R.CIPALDSLTPANEDQK.I              |
| HsFLAG-ARP6_Ti_1   | 5.6067 | 0.5819 | 2508.57 | 2509.823 | 6917.3  | 1                                                                   | 1522   | 56.8 | 2 K.IMQSSSEVGYDAMAGDFVNMVEK.G       |
| HsFLAG-Lin9_Ti_20  | 6.2836 | 0.3962 | 2870.29 | 2870.31  | 5700.5  | 1                                                                   | 1443.2 | 38.9 | 29 R.TALLDAAGVASLLTTAEVVVTEIPKEEK.D |
| HsFLAG-ARP6_Ti_1   | 4.5396 | 0.3634 | 2870.67 | 2870.31  | 8357    | 1                                                                   | 925.8  | 37   | 6 R.TALLDAAGVASLLTTAEVVVTEIPKEEK.D  |
| gij4502643 re      | 25     | 135    | 53.90%  | 531      | 58024   | 6.7 chaperonin containing TCP1, subunit 6A isoform a [Homo sapiens] |        |      |                                     |
| * HsFLAG-ARP6_Ti_1 | 4.0397 | 0.3034 | 2315.39 | 2316.681 | 10158.4 | 1                                                                   | 999.4  | 47.5 | 3 K.DGNVLLHEMQIQHTASLIAK.V          |
| * HsFLAG-ARP6_Ti_1 | 5.4597 | 0.3552 | 2316.08 | 2316.681 | 7053.2  | 1                                                                   | 1273.5 | 38.8 | 7 K.DGNVLLHEMQIQHTASLIAK.V          |
| * HsFLAG-ARP6_Ti_1 | 5.9    | 0.4955 | 2544.15 | 2545.847 | 7588.3  | 1                                                                   | 1762.9 | 56.2 | 17 K.VATAQDDITGDGTTSNVLIIGELLK.Q    |
| HsFLAG-ARP6_Ti_1   | 3.7343 | 0.4002 | 1499.92 | 1499.666 | 6308.5  | 1                                                                   | 943.2  | 75   | 4 K.QADLYISEGLHPR.I                 |
| HsFLAG-ARP6_Ti_1   | 1.9682 | 0.1405 | 1078.3  | 1079.238 | 7763.1  | 8                                                                   | 553.1  | 61.1 | 1 R.IITEGFEEAAK.E                   |
| HsFLAG-ARP6_Ti_1   | 2.8823 | 0.1664 | 1078.39 | 1079.238 | 2862.6  | 2                                                                   | 591.7  | 88.9 | 1 R.IITEGFEEAAK.E                   |
| HsFLAG-ARP5_Ti_1   | 2.8343 | 0.1002 | 1336.36 | 1336.528 | 6423.4  | 1                                                                   | 834.4  | 68.2 | 2 R.IITEGFEEAAKEK.A                 |
| HsFLAG-ARP6_Ti_1   | 3.3487 | 0.1038 | 1077.59 | 1077.266 | 5573.2  | 2                                                                   | 907.3  | 81.2 | 1 K.ALQFLEEVK.V                     |
| HsFLAG-ARP6_Ti_1   | 2.9696 | 0.2692 | 1448.75 | 1448.634 | 5842.5  | 1                                                                   | 872.3  | 77.3 | 2 R.EMDRETLDIVAR.T                  |
| HsFLAG-ARP5_Ti_1   | 6.3446 | 0.5346 | 2435.86 | 2436.852 | 8694.7  | 1                                                                   | 2660.2 | 65.9 | 2 R.TKVHAELADVLEAVVDSILAIAK.K       |
| HsFLAG-ARP5_Ti_1   | 4.8342 | 0.2882 | 2436.84 | 2436.852 | 8341.7  | 1                                                                   | 1494.1 | 36.4 | 4 R.TKVHAELADVLEAVVDSILAIAK.K       |
| HsFLAG-ARP5_Ti_1   | 7.6471 | 0.5783 | 2206.64 | 2207.572 | 8752    | 1                                                                   | 3403.7 | 75   | 13 K.VHAELADVLEAVVDSILAIAK.K        |
| HsFlag-FLJ90652_2  | 4.7128 | 0.3449 | 2206.73 | 2207.572 | 7305.3  | 1                                                                   | 1410.9 | 40   | 4 K.VHAELADVLEAVVDSILAIAK.K         |
| HsFLAG-ARP6_Ti_1   | 4.8275 | 0.4556 | 2110.32 | 2111.534 | 5992.6  | 1                                                                   | 1469.2 | 71.9 | 8 K.KQDEPIDLFMIEIMEMK.H             |
| HsFLAG-ARP5_Ti_1   | 2.7313 | 0.2003 | 937.89  | 938.074  | 5439    | 8                                                                   | 1126.8 | 87.5 | 1 R.GLVLDHGAR.H                     |
| HsFLAG-ARP6_Ti_1   | 5.519  | 0.4344 | 2203.14 | 2203.42  | 8598.2  | 1                                                                   | 1933.9 | 67.6 | 8 K.RVEDAYILTCNVSLEYEK.T            |
| HsFLAG-ARP6_Ti_1   | 3.5106 | 0.3082 | 2203.21 | 2203.42  | 9087.7  | 1                                                                   | 1117.4 | 36.8 | 1 K.RVEDAYILTCNVSLEYEK.T            |
| HsFLAG-ARP6_Ti_1   | 3.4526 | 0.2115 | 1192.52 | 1192.313 | 4731.4  | 5                                                                   | 825.4  | 83.3 | 1 K.TEVNSGFFYK.S                    |
| HsFLAG-ARP6_Ti_1   | 3.1888 | 0.1069 | 1264.48 | 1263.433 | 4938    | 1                                                                   | 1009.5 | 77.3 | 2 K.GIDPFSLDALSKE.E                 |

|                |                    |        |        |         |          |         |   |                                                                        |      |                                              |
|----------------|--------------------|--------|--------|---------|----------|---------|---|------------------------------------------------------------------------|------|----------------------------------------------|
|                | HsFLAG-ARP6_Ti_1   | 7.1509 | 0.5181 | 3885.64 | 3887.221 | 6718.3  | 1 | 1314.8                                                                 | 28.6 | 9 R.LTLACGGVALNSFDDLSPDCLGHAGLVYEYTLGEEK.F   |
|                | HsFLAG-ARP5_Ti_1   | 3.1407 | 0.3284 | 1282.61 | 1282.486 | 5310    | 1 | 733.7                                                                  | 80   | 1 K.HTLTQIKDAVR.D                            |
|                | HsFLAG-ARP6_Ti_1   | 4.6203 | 0.2911 | 2471.47 | 2471.794 | 6517.8  | 1 | 1740.5                                                                 | 39.6 | 1 K.NAIDDGCVVPGAGAVEVAMAEALIK.H              |
|                | HsFLAG-ARP6_Ti_1   | 4.3445 | 0.2152 | 2474.4  | 2471.794 | 2984.9  | 1 | 713.7                                                                  | 54.2 | 7 K.NAIDDGCVVPGAGAVEVAMAEALIK.H              |
|                | HsFLAG-ARP6_Ti_1   | 4.6701 | 0.2341 | 1768.42 | 1769.137 | 6717    | 1 | 1399.5                                                                 | 65.6 | 29 R.AQLGVQAFADALLIIPK.V                     |
|                | HsFLAG-ARP6_Ti_1   | 4.8912 | 0.4372 | 1761.75 | 1763.001 | 7799.7  | 1 | 2103.6                                                                 | 80   | 6 K.VLAQNSGFDLQETLVK.I                       |
| gij 15718687 r |                    | 15     | 143    | 53.90%  | 243      | 26688   |   | 9.7 ribosomal protein S3 [Homo sapiens]                                |      |                                              |
| *              | HsFLAG-ARP8_Ti_2   | 1.9781 | 0.1022 | 896.47  | 897.062  | 8093.3  | 9 | 639.2                                                                  | 71.4 | 2 K.FVADGIFK.A                               |
| *              | HsFlag-NUFIP_Ti_1C | 4.4139 | 0.4158 | 1423.66 | 1424.507 | 7334.9  | 1 | 2188.9                                                                 | 87.5 | 9 R.ELAEDGYSGVEVR.V                          |
| *              | HsFlag-NUFIP_Ti_1C | 3.7172 | 0.1719 | 1030.53 | 1030.253 | 7810.6  | 2 | 1884.5                                                                 | 93.8 | 35 R.TEIIILATR.T                             |
| *              | HsFLAG-ARP6_Ti_1   | 2.8445 | 0.0947 | 1157.49 | 1157.399 | 5164.6  | 1 | 987                                                                    | 83.3 | 3 R.IRELTAVVQK.R                             |
| *              | HsFlag-NUFIP_Ti_1C | 4.2958 | 0.3545 | 1729.5  | 1729.93  | 8183.8  | 1 | 1661.6                                                                 | 75   | 8 K.RFGFPEGSVELYAEK.V                        |
| *              | HsFlag-NUFIP_Ti_1C | 4.1674 | 0.2938 | 1290.6  | 1289.441 | 6768.3  | 1 | 1505.5                                                                 | 81.8 | 4 R.GLCAIAQAESLR.Y                           |
| *              | HsFlag-NUFIP_Ti_1C | 5.1309 | 0.3436 | 2468.86 | 2469.774 | 6437.1  | 1 | 1533.8                                                                 | 59.5 | 14 K.FVDGLMIHSGDPVNYVDTAVR.H                 |
| *              | HsFlag-NUFIP_Ti_1C | 5.0199 | 0.2285 | 2469.07 | 2469.774 | 9502.6  | 6 | 1057.7                                                                 | 32.1 | 3 K.FVDGLMIHSGDPVNYVDTAVR.H                  |
| *              | HsFlag-NUFIP_Ti_11 | 2.4634 | 0.3074 | 1458.66 | 1459.729 | 5097.4  | 6 | 439.8                                                                  | 54.2 | 4 K.KPLPDHVSIVEPK.D                          |
| *              | HsFlag-NUFIP_Ti_11 | 4.2433 | 0.379  | 1459.12 | 1459.729 | 6007.8  | 1 | 1564.5                                                                 | 87.5 | 8 K.KPLPDHVSIVEPK.D                          |
| *              | HsFlag-NUFIP_Ti_11 | 4.5983 | 0.3078 | 1459.94 | 1459.729 | 6227.7  | 5 | 1194                                                                   | 54.2 | 2 K.KPLPDHVSIVEPK.D                          |
| *              | HsFlag-NUFIP_Ti_11 | 5.6127 | 0.3552 | 2911.57 | 2912.353 | 6118.2  | 1 | 1002.9                                                                 | 36   | 18 K.KPLPDHVSIVEPKDEILPTTPISEQK.G            |
| *              | HsFlag-NUFIP_Ti_1C | 3.243  | 0.1752 | 1471.39 | 1471.648 | 3445.3  | 1 | 581.7                                                                  | 70.8 | 2 K.DEILPTTPISEQK.G                          |
| *              | HsFLAG-TCF3_Ti_1C  | 3.263  | 0.3808 | 1573.38 | 1574.835 | 5732.5  | 1 | 677.7                                                                  | 56.7 | 10 K.GGKPEPPAMPQPVPTA.-                      |
| *              | HsFlag-NUFIP_Ti_1C | 3.8216 | 0.2734 | 1575.58 | 1574.835 | 4494.7  | 1 | 507.6                                                                  | 56.7 | 21 K.GGKPEPPAMPQPVPTA.-                      |
| gij 4504255 re |                    | 9      | 185    | 53.90%  | 128      | 13553   |   | 10.6 H2A histone family, member Z [Homo sapiens]                       |      |                                              |
|                | HsFLAG-p53-DNA-D   | 3.1573 | 0.1473 | 944.77  | 945.109  | 5816.4  | 2 | 976.3                                                                  | 87.5 | 4 R.AGLQFPVGR.I                              |
|                | HsFLAG-ARP6_Ti_1   | 5.0088 | 0.2203 | 2896.64 | 2897.295 | 7081.8  | 1 | 768.2                                                                  | 37.5 | 10 R.VGATAAVYSAAILEYLTAEVLELAGNASK.D         |
|                | HsFLAG-p53-DNA-D   | 6.921  | 0.5122 | 2897.68 | 2897.295 | 9973.9  | 1 | 2207.8                                                                 | 33.9 | 34 R.VGATAAVYSAAILEYLTAEVLELAGNASK.D         |
|                | HsFlag-VPS71_Ti_1C | 3.9541 | 0.3703 | 1952.08 | 1951.23  | 5907.3  | 1 | 963.2                                                                  | 43.8 | 18 R.HLQLAIRGDEELDSLIIK.A                    |
|                | HsFlag-VPS71_Ti_1C | 4.5407 | 0.3286 | 1952.4  | 1951.23  | 7387    | 1 | 1319.1                                                                 | 68.8 | 84 R.HLQLAIRGDEELDSLIIK.A                    |
|                | HsYL1_Ti_101.2142. | 2.8377 | 0.2463 | 1118.51 | 1119.214 | 5405.5  | 3 | 537.2                                                                  | 66.7 | 7 R.GDEELDSLIIK.A                            |
|                | HsYL1_Ti_101.2175. | 3.6642 | 0.2321 | 1118.57 | 1119.214 | 5769.5  | 1 | 1206.6                                                                 | 83.3 | 6 R.GDEELDSLIIK.A                            |
|                | HsFLAG-TIP49a_Ti_  | 2.8651 | 0.19   | 1371.53 | 1371.625 | 4630.4  | 2 | 508.2                                                                  | 53.8 | 3 K.ATIAGGGVIPHIHK.S                         |
|                | HsFLAG-ARP6_Ti_1   | 4.3316 | 0.2618 | 1372.57 | 1371.625 | 6908.8  | 1 | 1554                                                                   | 76.9 | 19 K.ATIAGGGVIPHIHK.S                        |
| gij 14165435 r |                    | 24     | 411    | 53.60%  | 463      | 50976   |   | 5.5 heterogeneous nuclear ribonucleoprotein K isoform b [Homo sapiens] |      |                                              |
| gij 14165439 r |                    | 24     | 411    | 53.40%  | 464      | 51028   |   | 5.3 heterogeneous nuclear ribonucleoprotein K isoform a [Homo sapiens] |      |                                              |
| gij 14165437 r |                    | 24     | 411    | 53.40%  | 464      | 51028   |   | 5.3 heterogeneous nuclear ribonucleoprotein K isoform a [Homo sapiens] |      |                                              |
|                | HsFlag-DPCD_Ti_20  | 4.4594 | 0.3903 | 1580.41 | 1580.709 | 8750.7  | 1 | 1614.6                                                                 | 79.2 | 6 K.RPAEDMEEEQAFK.R                          |
|                | HsFLAG-p53-DNA-D   | 4.2225 | 0.4525 | 1735.84 | 1736.897 | 7303.3  | 1 | 1413.5                                                                 | 76.9 | 1 K.RPAEDMEEEQAFKR.S                         |
|                | HsFlag-VPS71_Ti_1C | 2.0636 | 0.0937 | 729.55  | 729.855  | 4751.3  | 5 | 414.1                                                                  | 71.4 | 1 K.NAGAVIGK.G                               |
|                | HsFLAG-FLJ20729_   | 3.684  | 0.236  | 1784.14 | 1781.83  | 4270.2  | 1 | 432.9                                                                  | 56.2 | 13 R.TDYNASVSPDSSGPER.I                      |
|                | HsFLAG-Lin9_Ti_20  | 5.4288 | 0.2928 | 1715.29 | 1716.025 | 8143.2  | 1 | 2154.5                                                                 | 76.7 | 90 R.ILSISADIETIGEILK.K                      |
|                | HsFLAG-p53-DNA-D   | 4.3681 | 0.3647 | 1844.7  | 1844.199 | 10272.9 | 1 | 1356.2                                                                 | 59.4 | 11 R.ILSISADIETIGEILKK.I                     |
|                | HsFlag-NUFIP_Ti_1C | 6.5926 | 0.4129 | 4185.69 | 4185.684 | 7498.7  | 1 | 1073.2                                                                 | 26.4 | 14 K.KIIPBLEEGLQLPSPTATSQLPLESDAVECLNYQHYK.G |
|                | HsFLAG-UTX1_Ti_2   | 5.32   | 0.2271 | 4056.59 | 4057.51  | 5435    | 1 | 600.8                                                                  | 25   | 2 K.IIPTLEEGLQLPSPTATSQLPLESDAVECLNYQHYK.G   |

|                |                     |        |        |         |          |         |   |        |      |                                                     |
|----------------|---------------------|--------|--------|---------|----------|---------|---|--------|------|-----------------------------------------------------|
|                | HsFlag-VPS71_Ti_10  | 3.1261 | 0.2606 | 1099.29 | 1099.108 | 4459.9  | 5 | 727    | 81.2 | 2 K.GSDFDCELR.L                                     |
|                | HsFlag-NUFIP_Ti_20  | 4.6696 | 0.3998 | 1517.57 | 1519.871 | 7205.9  | 1 | 1602.6 | 75   | 5 R.LLIHQSLAGGIIVK.G                                |
|                | HsFlag-NUFIP_Ti_11  | 3.6738 | 0.1203 | 1518.9  | 1519.871 | 5994.2  | 1 | 1076.9 | 67.9 | 6 R.LLIHQSLAGGIIVK.G                                |
|                | HsFlag-VPS71_Ti_10  | 2.976  | 0.1126 | 1333.59 | 1333.484 | 6995.3  | 1 | 634.1  | 75   | 2 K.ELRENTQTTIK.L                                   |
|                | HsFLAG-p53-DNA-D    | 4.1596 | 0.2946 | 1550.03 | 1550.6   | 7686.2  | 1 | 1290.3 | 72.7 | 33 K.LFQECCPHSTDR.V                                 |
|                | HsFlag-VPS71_Ti_10  | 4.2103 | 0.2343 | 2585.19 | 2585.855 | 9169.4  | 1 | 1170.6 | 31   | 2 K.LFQECCPHSTDRVVLIGGKPD.R                         |
|                | HsFLAG-FLJ20729_    | 3.274  | 0.2561 | 1053.74 | 1054.278 | 6148.7  | 2 | 1111.9 | 83.3 | 22 R.VVLIGGKPD.R                                    |
|                | HsFlag-NUFIP_Ti_20  | 4.8394 | 0.2806 | 1341.43 | 1341.631 | 8445.6  | 1 | 1884.7 | 81.8 | 36 K.IILDLISESPIK.G                                 |
|                | HsFLAG-p53-DNA-D    | 3.3999 | 0.1928 | 1341.82 | 1341.631 | 7956.6  | 1 | 710.1  | 63.6 | 10 K.IILDLISESPIK.G                                 |
|                | HsFlag-VPS71_Ti_10  | 3.2249 | 0.4284 | 3059.28 | 3060.249 | 4550.9  | 1 | 370.3  | 37.5 | 1 R.AQPYDPNFDYDQYDYGFTMMFDDR.R                      |
|                | HsFLAG-ARP6_Ti_10   | 5.3093 | 0.3956 | 1917.12 | 1918.197 | 6253.6  | 1 | 1088.8 | 61.1 | 37 R.GSYGDLGGPIITTQVTIPK.D                          |
|                | HsFLAG-p53-DNA-D    | 1.9309 | 0.1591 | 873.53  | 874.025  | 8213.5  | 1 | 728.1  | 75   | 1 K.DLAGSIIGK.G                                     |
|                | HsFLAG-p53-DNA-D    | 3.8613 | 0.3227 | 1259.91 | 1260.3   | 4944.5  | 1 | 1238.7 | 90   | 9 K.IDPLEGSEDR.I                                    |
|                | HsFLAG-Lin9_Ti_20   | 6.3425 | 0.3952 | 3831.32 | 3832.213 | 9179    | 1 | 1133.7 | 25.8 | 3 K.IDPLEGSEDRITITGTQDQIQNAQYLLQNSVK.Q              |
|                | HsFLAG-FLJ20309_    | 5.8294 | 0.3973 | 2590.9  | 2590.937 | 8461.4  | 1 | 1983.1 | 59.1 | 59 R.IITITGTQDQIQNAQYLLQNSVK.Q                      |
|                | HsFlag-VPS71_Ti_10  | 6.7891 | 0.3569 | 2591.57 | 2590.937 | 11336.8 | 1 | 2038.3 | 35.2 | 45 R.IITITGTQDQIQNAQYLLQNSVK.Q                      |
| gij 16933546 r |                     | 13     | 54     | 53.60%  | 317      | 34274   |   |        |      | 6 ribosomal protein P0 [Homo sapiens]               |
| gij 4506667 re |                     | 13     | 54     | 53.60%  | 317      | 34274   |   |        |      | 6 ribosomal protein P0 [Homo sapiens]               |
|                | HsFLAG-TCF3_Ti_10   | 2.8544 | 0.1604 | 1217.55 | 1218.436 | 9270.4  | 8 | 867.6  | 72.2 | 1 K.IIQLLDDYPK.C                                    |
|                | HsFLAG-ARP6_Ti_10   | 3.7857 | 0.2935 | 1218.67 | 1218.436 | 6828.6  | 3 | 1473.1 | 88.9 | 2 K.IIQLLDDYPK.C                                    |
|                | HsFLAG-ARP6_Ti_10   | 1.9059 | 0.1948 | 717.42  | 717.945  | 7227.4  | 5 | 538.6  | 66.7 | 1 K.AVFLMGK.N                                       |
|                | HsFlag-les6_293_Ti_ | 2.7323 | 0.2491 | 1221.32 | 1222.343 | 5096.6  | 3 | 473.7  | 60   | 2 R.GHLENNPALEK.L                                   |
|                | HsFLAG-p53-DNA-D    | 3.6373 | 0.2817 | 1222.89 | 1222.343 | 5747.6  | 1 | 1149.9 | 85   | 6 R.GHLENNPALEK.L                                   |
|                | HsFLAG-TCF3_Ti_10   | 3.3324 | 0.3577 | 1825.71 | 1826.059 | 7910.1  | 1 | 881.1  | 56.7 | 1 R.GNVGFVFTKEDLTEIR.D                              |
|                | HsFLAG-ARP6_Ti_10   | 3.8678 | 0.3706 | 2179.42 | 2181.417 | 3426    | 1 | 521    | 54.8 | 5 R.AGAIAPCEVTVPAQNTGLGPEK.T                        |
|                | HsFLAG-ARP6_Ti_10   | 4.6061 | 0.3448 | 1314.29 | 1314.524 | 8266.8  | 1 | 2246.1 | 90.9 | 6 K.TSFFQALGITTK.I                                  |
|                | HsFLAG-ARP6_Ti_10   | 4.1133 | 0.2876 | 1430.21 | 1429.697 | 6219.9  | 4 | 870.5  | 66.7 | 7 R.GTIEILSDVQLIK.T                                 |
|                | HsFLAG-ARP6_Ti_10   | 4.9592 | 0.4238 | 2788.5  | 2789.17  | 7792.9  | 1 | 1174.3 | 31   | 4 R.NVASVCLQIGYPTVASVPHSINGYK.R                     |
|                | HsFLAG-ARP6_Ti_10   | 4.8884 | 0.4658 | 2053.19 | 2053.363 | 5594.2  | 1 | 1440   | 67.6 | 9 K.RVLALSVDYTFPLAEK.V                              |
|                | HsFLAG-TCF3_Ti_10   | 4.9384 | 0.5219 | 2753.49 | 2754.158 | 4976.7  | 1 | 931.4  | 46.7 | 2 K.AFLADPSAFVAAAPVAAATTAAPAAAAAPAK.V               |
|                | HsFLAG-ARP6_Ti_10   | 5.4288 | 0.2899 | 3180.94 | 3181.659 | 6767.8  | 1 | 1117.6 | 27.9 | 8 K.AFLADPSAFVAAAPVAAATTAAPAAAAAPAKVEAK.E           |
| gij 17933772 r |                     | 4      | 16     | 53.40%  | 103      | 11801   |   |        |      | 6.8 S100 calcium binding protein A16 [Homo sapiens] |
| *              | HsFlag-VPS71_Ti_10  | 4.0377 | 0.2938 | 1295.74 | 1295.565 | 6598.9  | 1 | 1342.7 | 80   | 4 K.AVIVLVENFYK.Y                                   |
| *              | HsMRGBP-FLAG_Ti_    | 2.8714 | 0.3129 | 1515.58 | 1515.684 | 8755.5  | 1 | 796    | 58.3 | 3 K.ELNHMLSDTGNRK.A                                 |
| *              | HsFlag-VPS71_Ti_10  | 3.9606 | 0.2933 | 1366.7  | 1366.476 | 7820.8  | 1 | 1706   | 86.4 | 3 K.LIQNLNLDANHDGR.I                                |
| *              | HsFlag-VPS71_Ti_10  | 4.9324 | 0.2565 | 2083.4  | 2082.404 | 6205.4  | 1 | 1098.4 | 58.3 | 6 R.ISFDEYWTLIGGITGPIAK.L                           |
| gij 20070220 r |                     | 26     | 224    | 53.10%  | 637      | 72684   |   |        |      | 6.3 SKB1 homolog [Homo sapiens]                     |
| *              | HsFLAG-ARP6_Ti_2    | 5.1946 | 0.4258 | 1787.13 | 1786.986 | 2751.9  | 1 | 578.7  | 68.8 | 11 R.DLNCVPEIADTLGAVAK.Q                            |
| *              | HsFLAG-FLJ20729_    | 3.142  | 0.4346 | 1751.03 | 1752.009 | 7308    | 2 | 558.3  | 53.8 | 7 K.QGFDFLCMPVFHPR.F                                |
| *              | HsFlag-NUFIP_Ti_11  | 3.6752 | 0.2986 | 1752.16 | 1752.009 | 6631.7  | 1 | 945.2  | 46.2 | 3 K.QGFDFLCMPVFHPR.F                                |
| *              | HsFlag-VPS71_Ti_10  | 2.6178 | 0.1607 | 1118.6  | 1118.278 | 4121.7  | 3 | 700.5  | 87.5 | 1 K.REFIQEPAK.N                                     |
| *              | HsFlag-FLJ90652_2   | 2.6158 | 0.1054 | 1045.35 | 1046.211 | 5656.2  | 2 | 868.2  | 81.2 | 6 R.DWNTLIVGK.L                                     |
| *              | HsFlag-FLJ90652_2   | 6.4074 | 0.4439 | 3848.69 | 3850.338 | 7917.3  | 1 | 1751.8 | 32.4 | 6 R.NSEAMLQELNFGAYLGLPAFLPLNQEDNTNLAR.V             |



|               |                       |        |        |         |          |         |                                                        |        |      |                                       |
|---------------|-----------------------|--------|--------|---------|----------|---------|--------------------------------------------------------|--------|------|---------------------------------------|
| *             | HsFlag-NUFIP_Ti_10    | 3.4275 | 0.264  | 1109.42 | 1109.311 | 6605.8  | 2                                                      | 1071.5 | 83.3 | 16 R.VPLVAPEDLR.D                     |
| *             | HsFlag-VPS71_Ti_10    | 5.0254 | 0.3991 | 2280.81 | 2279.333 | 5042.8  | 1                                                      | 1043.1 | 60.5 | 13 R.DDIENAPTTHTTEEYSGEEK.T           |
| *             | HsFLAG-ARP6_Ti_1      | 2.692  | 0.1495 | 1364.32 | 1364.569 | 6505    | 1                                                      | 1124.8 | 87.5 | 1 K.TWMWWHNR.T                        |
| *             | HsFlag-FLJ90652_29    | 3.6996 | 0.2411 | 2005.73 | 2004.294 | 8047.9  | 2                                                      | 863.3  | 50   | 1 R.IAVALEIGADLPSNHVIDR.W             |
| *             | HsFlag-VPS71_Ti_10    | 2.5957 | 0.2375 | 1389.52 | 1389.678 | 6026    | 3                                                      | 418.8  | 54.2 | 1 K.AAILPTSIFLTNK.K                   |
| *             | HsFlag-VPS71_Ti_10    | 4.3077 | 0.4366 | 1389.66 | 1389.678 | 3138    | 1                                                      | 848.4  | 83.3 | 24 K.AAILPTSIFLTNK.K                  |
| *             | HsARP6-FLAG_Ti_10     | 3.1522 | 0.2594 | 1517.38 | 1517.852 | 4242.2  | 1                                                      | 454.2  | 61.5 | 3 K.AAILPTSIFLTNKK.G                  |
| *             | HsFLAG-ARP6_Ti_1      | 1.9027 | 0.1552 | 875.23  | 876.087  | 4239.2  | 5                                                      | 463    | 71.4 | 1 K.KGFPVLSK.M                        |
| *             | HsFLAG-ARP6_Ti_1      | 3.2311 | 0.0923 | 876.3   | 876.087  | 3289.3  | 2                                                      | 852.6  | 100  | 2 K.KGFPVLSK.M                        |
| *             | HsFlag-FLJ90652_29    | 5.6089 | 0.4636 | 3343.94 | 3342.698 | 9846.9  | 1                                                      | 1039.8 | 27.9 | 23 K.EFCSYLQYLEYLSQRNPPPNAYELFAK.G    |
| *             | HsFLAG-p53-DNA-D      | 4.5541 | 0.3257 | 3692.6  | 3692.085 | 4916.7  | 1                                                      | 445.8  | 25   | 1 K.GYEDYLQSPQLPLMDNLESQTYEVFEKDIK.Y  |
| *             | HsFlag-VPS71_Ti_10    | 2.9186 | 0.1393 | 1291.54 | 1292.434 | 8771    | 1                                                      | 842.1  | 72.2 | 4 K.YSQYQQAIYK.C                      |
| *             | HsFLAG-FLJ20729_1     | 3.738  | 0.2497 | 1294.2  | 1292.434 | 6430.7  | 1                                                      | 1248.3 | 88.9 | 11 K.YSQYQQAIYK.C                     |
| *             | HsFLAG-FLJ20729_1     | 3.8105 | 0.1816 | 1388.37 | 1388.527 | 6978    | 4                                                      | 1467.2 | 85   | 3 K.CLLDRVPEEEK.D                     |
| *             | HsFlag-FLJ20643_Ti_10 | 2.1587 | 0.0909 | 927.67  | 927.092  | 3040.6  | 6                                                      | 140.5  | 68.8 | 1 R.GPLVNASLR.A                       |
| *             | HsFLAG-ARP6_Ti_10     | 3.0009 | 0.1917 | 928.41  | 927.092  | 4495.7  | 1                                                      | 882.7  | 87.5 | 7 R.GPLVNASLR.A                       |
| *             | HsFlag-VPS71_Ti_10    | 5.7245 | 0.2148 | 3290.53 | 3290.617 | 6905.6  | 1                                                      | 1197   | 32.8 | 32 K.ADIIVSELLGSFADNELSPECLDGAQHFLK.D |
| *             | HsFLAG-ARP6_Ti_10     | 4.4815 | 0.5053 | 2170.59 | 2171.365 | 2996.2  | 1                                                      | 466.1  | 57.5 | 29 K.DDGVSIPGEYTSFLAPISSSK.L          |
| *             | HsFlag-VPS71_Ti_10    | 3.7445 | 0.3664 | 1854.67 | 1853.059 | 3927.3  | 1                                                      | 572.2  | 67.9 | 6 K.DRDPEAQFEMPYVVR.L                 |
| *             | HsFLAG-ARP6_Ti_10     | 4.5472 | 0.4432 | 2415.83 | 2415.679 | 5542.7  | 1                                                      | 658    | 50   | 11 K.VWYEWAVTAPVCSAIHNPTR.S           |
| gi 4757756 re | 14                    | 36     | 52.80% | 339     | 38604    | 7.8     | annexin A2 isoform 2 [Homo sapiens]                    |        |      |                                       |
| gi 50845388 r | 14                    | 36     | 50.10% | 357     | 40411    | 8.4     | annexin A2 isoform 1 [Homo sapiens]                    |        |      |                                       |
| gi 50845386 r | 14                    | 36     | 52.80% | 339     | 38604    | 7.8     | annexin A2 isoform 2 [Homo sapiens]                    |        |      |                                       |
|               | HsFlag-VPS71_Ti_10    | 4.7006 | 0.4008 | 1845.64 | 1846.004 | 3999.8  | 1                                                      | 675.1  | 58.8 | 2 K.LSLEGDHSTPPSAYGSVK.A              |
|               | HsFlag-VPS71_Ti_10    | 4.9755 | 0.3423 | 2156.9  | 2156.357 | 9527.1  | 1                                                      | 1703   | 58.3 | 4 K.AYTNFDAERDALNIETAIK.T             |
|               | HsFlag-VPS71_Ti_10    | 4.6366 | 0.377  | 1545.79 | 1543.761 | 7825.3  | 2                                                      | 1412.5 | 69.2 | 3 K.GVDEVTIVNILTNR.S                  |
|               | HsFlag-VPS71_Ti_10    | 5.5143 | 0.3919 | 1652.07 | 1651.987 | 7690.6  | 1                                                      | 1532.2 | 66.7 | 2 K.SALSGHLETVILGLLK.T                |
|               | HsFlag-VPS71_Ti_10    | 3.0298 | 0.2405 | 1222.55 | 1223.325 | 4699.9  | 2                                                      | 364.5  | 65   | 2 K.TPAQYDASELK.A                     |
|               | HsFlag-VPS71_Ti_10    | 4.5309 | 0.3381 | 1779.71 | 1778.92  | 8664.5  | 1                                                      | 1505.3 | 66.7 | 4 K.GLGTDEDSLIEIICSR.T                |
|               | HsFlag-VPS71_Ti_10    | 3.784  | 0.1427 | 1245.48 | 1245.335 | 8893.2  | 5                                                      | 1396.8 | 83.3 | 2 R.TNQELQEINR.V                      |
|               | HsFlag-VPS71_Ti_10    | 3.5438 | 0.3613 | 1354.95 | 1354.459 | 6328.9  | 1                                                      | 942.1  | 72.7 | 2 K.DIIDSTSGDFRK.L                    |
|               | HsFlag-VPS71_Ti_10    | 4.4071 | 0.2774 | 1911.65 | 1910.001 | 7202.7  | 1                                                      | 1101.3 | 59.4 | 2 R.AEDGSVIDYELIDQDAR.D               |
|               | HsFlag-VPS71_Ti_10    | 3.7581 | 0.3363 | 1461.69 | 1461.629 | 6535.9  | 1                                                      | 1194.4 | 81.8 | 2 K.SYSPYDMLIESIR.K                   |
|               | HsFlag-VPS71_Ti_10    | 5.4387 | 0.3657 | 1976.99 | 1977.191 | 8279.6  | 1                                                      | 1920.1 | 68.8 | 5 K.GDLENAFLNLVQCQIKNK.P              |
|               | HsFlag-VPS71_Ti_10    | 3.9033 | 0.3522 | 2840.16 | 2840.174 | 7230.3  | 1                                                      | 554.5  | 37   | 2 K.GDLENAFLNLVQCQIKNKPLYFADR.L       |
|               | HsFlag-VPS71_Ti_10    | 4.5102 | 0.3094 | 2841.4  | 2840.174 | 5634.5  | 2                                                      | 683.5  | 31.5 | 3 K.GDLENAFLNLVQCQIKNKPLYFADR.L       |
|               | HsFlag-VPS71_Ti_10    | 1.961  | 0.3259 | 1096.45 | 1097.176 | 7032.6  | 6                                                      | 595.9  | 55.6 | 1 K.ALLYLGGDD.-                       |
| gi 5453597 re | 10                    | 26     | 52.40% | 286     | 32923    | 5.7     | F-actin capping protein alpha-1 subunit [Homo sapiens] |        |      |                                       |
| *             | HsFlag-FLJ90652_29    | 5.0952 | 0.2311 | 2089.41 | 2090.302 | 5807.2  | 1                                                      | 1687   | 50   | 5 K.FITHAPPGEFNEVFNDVR.L              |
| *             | HsFLAG-p53-DNA-D      | 3.4989 | 0.3539 | 2090.06 | 2090.302 | 3673.9  | 1                                                      | 420.1  | 52.9 | 5 K.FITHAPPGEFNEVFNDVR.L              |
|               | HsFlag-FLJ90652_29    | 3.7224 | 0.1765 | 1199.09 | 1198.408 | 6513.5  | 1                                                      | 1344.7 | 94.4 | 5 R.LLLNNDNLLR.E                      |
| *             | HsFlag-FLJ90652_29    | 5.2782 | 0.4116 | 4354.19 | 4353.723 | 11358.5 | 1                                                      | 1096.1 | 22.4 | 1 F                                   |
| *             | HsFlag-FLJ90652_29    | 3.1525 | 0.3068 | 1542.66 | 1543.584 | 4532.1  | 2                                                      | 590.5  | 64.3 | 2 K.EASDPQPEEADGGLK.S                 |

|               |                   |        |        |         |          |         |                                                                |        |      |                                          |
|---------------|-------------------|--------|--------|---------|----------|---------|----------------------------------------------------------------|--------|------|------------------------------------------|
| *             | HsFlag-FLJ90652_2 | 3.5417 | 0.2973 | 2314.54 | 2315.554 | 8045.8  | 1                                                              | 993.1  | 52.6 | 2 K.TIDGQQTIIACIESHQFQPK.N               |
| *             | HsFLAG-ARP6_Ti_1  | 3.7527 | 0.2252 | 2316.8  | 2315.554 | 2908.3  | 1                                                              | 335.6  | 35.5 | 1 K.TIDGQQTIIACIESHQFQPK.N               |
| *             | HsFlag-FLJ90652_2 | 2.7952 | 0.2627 | 1572.51 | 1571.9   | 6265.8  | 1                                                              | 390.8  | 46.4 | 1 K.FTITPPTAQVGVVLK.I                    |
|               | HsFlag-FLJ90652_2 | 4.9973 | 0.4721 | 2029.62 | 2030.247 | 9558.4  | 1                                                              | 2401.2 | 75   | 2 K.IQVHYEDGNVQLVSHK.D                   |
| *             | HsFLAG-ARP6_Ti_1  | 4.6486 | 0.3437 | 1706.18 | 1706.804 | 6726.8  | 1                                                              | 1317.5 | 70   | 2 K.DVQDSLTVSNEAQTAK.E                   |
| gi 4504253 re | 6                 | 58     | 52.40% | 143     | 15145    | 10.7    | H2A histone family, member X [Homo sapiens]                    |        |      |                                          |
|               | HsFLAG-p53-DNA-D  | 3.1573 | 0.1473 | 944.77  | 945.109  | 5816.4  | 2                                                              | 976.3  | 87.5 | 4 R.AGLQFPVGR.V                          |
|               | HsFLAG-Lin9_Ti_20 | 5.4913 | 0.4094 | 2916.83 | 2917.375 | 9478.7  | 1                                                              | 1610.8 | 32.1 | 3 R.VGAGAPVYLAHVLEYLTAEILELAGNAAR.D      |
|               | HsFLAG-Lin9_Ti_20 | 5.6884 | 0.3714 | 2917.12 | 2917.375 | 9129.3  | 1                                                              | 1489.7 | 42.9 | 5 R.VGAGAPVYLAHVLEYLTAEILELAGNAAR.D      |
|               | HsFLAG-ARP6_Ti_1  | 4.029  | 0.2972 | 1693.82 | 1693.9   | 8806.2  | 2                                                              | 1211.8 | 69.2 | 9 R.HLQLAIRNDEELNK.L                     |
|               | HsFLAG-UTX1_Ti_2  | 5.5814 | 0.272  | 2271.31 | 2272.78  | 5991.5  | 1                                                              | 679    | 47.7 | 34 K.LLGGVTIAQGGVLPNIQAVLLPK.K           |
|               | HsFLAG-ARP6_Ti_1  | 5.3074 | 0.2108 | 2272.4  | 2272.78  | 7635.3  | 1                                                              | 1565.9 | 40.9 | 3 K.LLGGVTIAQGGVLPNIQAVLLPK.K            |
| gi 5453607 re | 26                | 183    | 52.30% | 543     | 59367    | 7.6     | chaperonin containing TCP1, subunit 7 isoform a [Homo sapiens] |        |      |                                          |
| *             | HsFLAG-ARP6_Ti_1  | 4.0742 | 0.3168 | 2830.89 | 2831.075 | 4591.7  | 1                                                              | 356.9  | 34.6 | 2 K.EGTDSSQGIPQLVSNISACQVIAEAVR.T        |
| *             | HsFLAG-ARP6_Ti_1  | 2.6331 | 0.211  | 1064.52 | 1063.285 | 4820.5  | 1                                                              | 505.1  | 66.7 | 6 K.LLDVVHPPAAK.T                        |
| *             | HsFLAG-ARP6_Ti_1  | 3.6471 | 0.3747 | 1064.6  | 1063.285 | 4791.7  | 6                                                              | 921.6  | 83.3 | 5 K.LLDVVHPPAAK.T                        |
| *             | HsFLAG-ARP6_Ti_1  | 5.9376 | 0.5559 | 2253.84 | 2253.468 | 6502.7  | 1                                                              | 1758.6 | 66.7 | 33 K.SQDAEVDGTTSVTLAAEFLK.Q              |
| *             | HsFLAG-ARP6_Ti_1  | 5.1981 | 0.3087 | 2254.74 | 2253.468 | 9357    | 1                                                              | 1774.6 | 38.1 | 5 K.SQDAEVDGTTSVTLAAEFLK.Q               |
| *             | HsFLAG-ARP5_Ti_1  | 2.8657 | 0.3561 | 2019.8  | 2020.382 | 6347.5  | 1                                                              | 482.7  | 46.9 | 3 K.QVKPYVEEGLHPQIIIR.A                  |
| *             | HsFLAG-ARP6_Ti_1  | 4.0077 | 0.392  | 1665.38 | 1664.945 | 3760.4  | 3                                                              | 548.3  | 42.3 | 1 K.PYVEEGLHPQIIIR.A                     |
| *             | HsFLAG-ARP6_Ti_1  | 4.3819 | 0.3859 | 1666    | 1664.945 | 5090.7  | 1                                                              | 1253.4 | 80.8 | 2 K.PYVEEGLHPQIIIR.A                     |
| *             | HsFLAG-ARP6_Ti_1  | 5.0177 | 0.3226 | 1835.7  | 1835.286 | 8891.3  | 1                                                              | 2709   | 80   | 8 K.MVVDVAVMLDLDLLQK.M                   |
| *             | HsFLAG-ARP6_Ti_1  | 5.7798 | 0.5256 | 1917.19 | 1918.2   | 9625.5  | 1                                                              | 3406.6 | 77.8 | 7 K.KVQGGALEDSQLVAGVAFK.K                |
|               | HsFLAG-ARP6_Ti_1  | 3.3405 | 0.1006 | 1255.8  | 1255.541 | 5541.9  | 3                                                              | 918.4  | 80   | 3 K.IALLNVELELK.A                        |
|               | HsFLAG-ARP6_Ti_1  | 5.1866 | 0.4052 | 2521.81 | 2522.773 | 7909.5  | 1                                                              | 1503.2 | 57.5 | 2 R.VHTVEDYQAIVDAEWNILYDK.L              |
|               | HsFLAG-ARP6_Ti_1  | 6.692  | 0.443  | 2892.54 | 2893.222 | 6406.4  | 1                                                              | 1106.8 | 37   | 23 R.VHTVEDYQAIVDAEWNILYDKLEK.I          |
|               | HsFLAG-ARP6_Ti_1  | 4.4023 | 0.3619 | 1566.26 | 1566.754 | 7942.8  | 1                                                              | 2390   | 88.5 | 6 K.LPIGDVATQYFADR.D                     |
|               | HsFLAG-ARP6_Ti_1  | 4.2092 | 0.3393 | 3214.92 | 3215.571 | 6798.5  | 1                                                              | 597.5  | 26.9 | 3 K.LPIGDVATQYFADRDMFCAGRVPEDLK.R        |
|               | HsFLAG-ARP6_Ti_1  | 4.3253 | 0.3686 | 2496.32 | 2496.826 | 9511.1  | 1                                                              | 1655.6 | 37   | 1 K.RTMMACGGSIQTSVNALSADVLGR.C           |
|               | HsFLAG-ARP6_Ti_1  | 5.8698 | 0.5489 | 2339.52 | 2340.638 | 9328.3  | 1                                                              | 2613   | 65.9 | 2 R.TMMACGGSIQTSVNALSADVLGR.C            |
|               | HsFLAG-ARP6_Ti_1  | 2.2226 | 0.3025 | 1133.12 | 1134.243 | 6595.8  | 1                                                              | 503.5  | 68.8 | 1 R.YNFFTGCPC.A                          |
|               | HsFLAG-ARP6_Ti_1  | 3.0882 | 0.2804 | 1134.19 | 1134.243 | 5234.4  | 1                                                              | 998.3  | 93.8 | 1 R.YNFFTGCPC.A                          |
|               | HsFLAG-ARP6_Ti_1  | 2.6952 | 0.1912 | 1154.48 | 1155.401 | 4212.1  | 1                                                              | 594.1  | 72.2 | 5 R.SLHDAIMIVR.R                         |
|               | HsFLAG-ARP6_Ti_1  | 3.5328 | 0.315  | 1155.79 | 1155.401 | 4525.4  | 1                                                              | 958.6  | 88.9 | 8 R.SLHDAIMIVR.R                         |
|               | HsFLAG-ARP6_Ti_1  | 1.8789 | 0.2265 | 1104.28 | 1105.323 | 2808.5  | 3                                                              | 178.2  | 72.2 | 1 K.QLLIGAYAK.A                          |
|               | HsFLAG-ARP6_Ti_1  | 5.2815 | 0.4657 | 3653    | 3653.964 | 7956.9  | 1                                                              | 839    | 25   | 7 R.HAQQGTWYGVDDINNEADIADNFEAFVWEPAMVR.I |
|               | HsFLAG-ARP6_Ti_1  | 5.7038 | 0.4229 | 2289.42 | 2290.582 | 6673.7  | 1                                                              | 1634.2 | 42.9 | 18 R.INALTAASEAACLVSVDET.K               |
|               | HsFLAG-ARP6_Ti_1  | 5.2334 | 0.4947 | 2289.71 | 2290.582 | 7942    | 1                                                              | 1302.4 | 54.8 | 24 R.INALTAASEAACLVSVDET.K               |
|               | HsFLAG-ARP5_Ti_1  | 4.789  | 0.439  | 2658.13 | 2657.99  | 6276.2  | 1                                                              | 1486.5 | 37.5 | 6 R.INALTAASEAACLVSVDET.KNPR.S           |
| gi 14591909 r | 14                | 86     | 52.20% | 297     | 34363    | 9.7     | ribosomal protein L5 [Homo sapiens]                            |        |      |                                          |
| *             | HsFLAG-TCF3_Ti_1  | 3.2125 | 0.2659 | 1695.48 | 1693.91  | 10456.5 | 1                                                              | 1208.5 | 61.5 | 1 R.VTNRDIICQIAYAR.I                     |
| *             | HsFLAG-ARP6_Ti_1  | 4.0305 | 0.3234 | 1918.24 | 1918.181 | 6057.5  | 1                                                              | 1223   | 65.6 | 5 R.IEGDMIVCAAYAHLPK.Y                   |
| *             | HsFLAG-ARP6_Ti_1  | 3.6956 | 0.104  | 1918.44 | 1918.181 | 2764.7  | 1                                                              | 730.1  | 50   | 1 R.IEGDMIVCAAYAHLPK.Y                   |

|               |                     |        |        |         |          |                                                                  |   |        |      |    |                                         |
|---------------|---------------------|--------|--------|---------|----------|------------------------------------------------------------------|---|--------|------|----|-----------------------------------------|
| *             | HsFlag-NUFIP_Ti_11  | 5.6926 | 0.5489 | 1927.94 | 1928.205 | 7692.9                                                           | 1 | 1908.3 | 70.6 | 32 | K.VGLTNYAAAYCTGLLLAR.R                  |
| *             | HsFLAG-TCF3_Ti_10   | 4.097  | 0.2712 | 3839.36 | 3839.083 | 9235                                                             | 1 | 644.8  | 22.8 | 4  | K.IYEGQVEVTGDEYNVESIDGQPGAFTCYLDAGLAR.T |
|               | HsFLAG-TCF3_Ti_10   | 3.0837 | 0.3144 | 1339.44 | 1339.491 | 5312.9                                                           | 1 | 540.1  | 53.8 | 5  | K.GAVDGGLSIPHSTK.R                      |
|               | HsFLAG-TCF3_Ti_10   | 4.3443 | 0.334  | 1339.55 | 1339.491 | 5330.6                                                           | 1 | 1242.6 | 73.1 | 15 | K.GAVDGGLSIPHSTK.R                      |
| *             | HsFlag-les6_293_Ti_ | 3.1039 | 0.2148 | 1186.39 | 1186.266 | 4563.3                                                           | 3 | 724.5  | 77.8 | 5  | K.RFPGYDSESK.E                          |
|               | HsFlag-NUFIP_Ti_10  | 2.7438 | 0.2254 | 1002.12 | 1002.074 | 4232.6                                                           | 5 | 454.5  | 85.7 | 2  | K.EFNAEVHR.K                            |
|               | HsFLAG-TCF3_Ti_10   | 2.5478 | 0.1733 | 1130.53 | 1130.249 | 7159.6                                                           | 5 | 507.4  | 68.8 | 1  | K.EFNAEVHRK.H                           |
| *             | HsFlag-NUFIP_Ti_10  | 4.1787 | 0.3444 | 1435.43 | 1435.659 | 4128.4                                                           | 1 | 1179.6 | 90.9 | 9  | K.HIMGQNVADYMR.Y                        |
| *             | HsFlag-NUFIP_Ti_10  | 2.8373 | 0.2685 | 1435.61 | 1435.659 | 5661.2                                                           | 3 | 440.8  | 59.1 | 3  | K.HIMGQNVADYMR.Y                        |
| *             | HsFlag-les6_293_Ti_ | 3.4582 | 0.2226 | 1534.47 | 1534.678 | 6348                                                             | 1 | 1310.6 | 81.8 | 2  | R.YLMEEDDAYKK.Q                         |
| *             | HsFLAG-ARP6_Ti_11   | 3.5728 | 0.3501 | 1704.32 | 1703.981 | 4019.2                                                           | 1 | 528.3  | 65.4 | 1  | K.NSVTPDMMEEMYKK.A                      |
| gi 4507129 re | 3                   | 36     | 52.20% | 92      | 10804    | 9.4 small nuclear ribonucleoprotein polypeptide E [Homo sapiens] |   |        |      |    |                                         |
|               | HsFlag-NUFIP_Ti_10  | 3.5115 | 0.2383 | 1330.56 | 1330.675 | 4657.9                                                           | 1 | 765.5  | 80   | 21 | K.VMVQPINLIFR.Y                         |
|               | HsFlag-VPS71_Ti_10  | 6.5728 | 0.3545 | 2915.07 | 2912.204 | 5474.5                                                           | 1 | 1148.3 | 36.5 | 13 | R.IEGCIIGFDEYMNVLDDAEEIHSK.T            |
|               | HsFLAG-TCF3_Ti_10   | 3.2466 | 0.1744 | 1262.67 | 1261.375 | 6961.7                                                           | 1 | 855.9  | 68.2 | 2  | K.GDNITLLQSVSN.-                        |
| gi 13699824 r | 53                  | 472    | 51.90% | 1056    | 119159   | 5.6 kinesin family member 11 [Homo sapiens]                      |   |        |      |    |                                         |
| *             | HsFLAG-ARP8_Ti_2    | 2.512  | 0.2111 | 1162.96 | 1163.288 | 5844.1                                                           | 1 | 699    | 81.2 | 1  | R.CRPFNLAER.K                           |
| *             | HsFLAG-ARP8_Ti_2    | 3.6228 | 0.4237 | 1569.68 | 1569.724 | 6705.3                                                           | 1 | 1061.2 | 69.2 | 28 | K.ASAHSIVECDPVRK.E                      |
| *             | HsFLAG-TIP49a_Ti_   | 4.9394 | 0.4141 | 3168.5  | 3169.446 | 8174.1                                                           | 1 | 998.7  | 27.9 | 3  | K.TFTMEGERSPNEEYTWEEEDPLAGIIPR.T        |
| *             | HsFLAG-Lin9_Ti_20   | 5.8273 | 0.5301 | 2216.74 | 2217.397 | 9378.5                                                           | 1 | 2328   | 66.7 | 29 | R.SPNEEYTWEEEDPLAGIIPR.T                |
| *             | HsFlag-FLJ90652_20  | 1.9307 | 0.149  | 1015.44 | 1016.185 | 4588.3                                                           | 6 | 338.8  | 64.3 | 1  | R.TLHQIFEK.L                            |
| *             | HsFLAG-RPB5MP_2     | 2.839  | 0.1141 | 1016.19 | 1016.185 | 5646.1                                                           | 5 | 659.4  | 85.7 | 5  | R.TLHQIFEK.L                            |
| *             | HsFLAG-RPB5MP_2     | 2.9366 | 0.2082 | 1211.06 | 1211.314 | 5525.9                                                           | 2 | 675.1  | 75   | 1  | K.LTDNGTEFSVK.V                         |
| *             | HsFLAG-Lin9_Ti_20   | 3.7905 | 0.3635 | 2782.9  | 2783.061 | 10191.6                                                          | 1 | 1148.9 | 33.7 | 1  | K.VSLLEIYNEELFDLLNPSSDVSER.L            |
| *             | HsFlag-NUFIP_Ti_10  | 5.1961 | 0.2798 | 2783.34 | 2783.061 | 8903.3                                                           | 2 | 795.7  | 39.1 | 37 | K.VSLLEIYNEELFDLLNPSSDVSER.L            |
| *             | HsFLAG-RPB5MP_2     | 4.3937 | 0.2807 | 2258.07 | 2258.533 | 9584.7                                                           | 1 | 1117.5 | 52.8 | 3  | K.GLEEITVHNKDEVYQILEK.G                 |
| *             | HsFLAG-RPB5MP_2     | 4.5217 | 0.3151 | 2260.61 | 2258.533 | 8099.4                                                           | 1 | 1023.2 | 37.5 | 3  | K.GLEEITVHNKDEVYQILEK.G                 |
| *             | HsFLAG-KIAA0515_    | 2.7163 | 0.1524 | 1136.42 | 1137.275 | 9287.1                                                           | 7 | 1027.9 | 75   | 1  | K.DEVYQILEK.G                           |
| *             | HsFLAG-KIAA0515_    | 2.8092 | 0.1165 | 1137.96 | 1137.275 | 4147.2                                                           | 5 | 816    | 81.2 | 2  | K.DEVYQILEK.G                           |
| *             | HsFLAG-ARP8_Ti_2    | 4.6717 | 0.4222 | 1544.58 | 1543.738 | 8293.4                                                           | 1 | 1099.4 | 69.2 | 7  | K.RTTAATLMNAYSSR.S                      |
| *             | HsFLAG-KIAA0515_    | 2.8433 | 0.2948 | 1389.14 | 1387.551 | 5747.1                                                           | 1 | 644.9  | 62.5 | 1  | R.TTAATLMNAYSSR.S                       |
| *             | Hs293Flag-les2_Ti_1 | 5.4227 | 0.2156 | 1470.66 | 1471.654 | 8066.9                                                           | 1 | 2305.6 | 88.5 | 29 | K.LNLVDLAGSENIGR.S                      |
| *             | HsFLAG-ARP6_Ti_11   | 4.2412 | 0.3831 | 1486.21 | 1486.668 | 8615.7                                                           | 1 | 1163.2 | 69.2 | 21 | R.EAGNINQSLTLGR.V                       |
| *             | HsFLAG-RPB5MP_2     | 2.5072 | 0.2139 | 959.12  | 959.09   | 4637.6                                                           | 1 | 1012.1 | 87.5 | 1  | R.ILQDSLGGRT                            |
| *             | HsFLAG-Lin9_Ti_20   | 3.5127 | 0.1891 | 2831.57 | 2832.18  | 4635.2                                                           | 1 | 566.5  | 29   | 1  | R.TSIIATISPASLNLEETLSTLEYAHR.A          |
| *             | Hs293Flag-les2_Ti_1 | 3.348  | 0.357  | 2833.61 | 2832.18  | 9393                                                             | 1 | 618.5  | 36   | 4  | R.TSIIATISPASLNLEETLSTLEYAHR.A          |
| *             | HsFlag-FLJ20643_Ti  | 3.5177 | 0.0861 | 1298.64 | 1297.497 | 5740.8                                                           | 3 | 931    | 80   | 12 | K.NILNKPEVNQK.L                         |
| *             | HsFLAG-KIAA0515_    | 1.9392 | 0.2153 | 1068.41 | 1069.113 | 1951                                                             | 6 | 113.8  | 64.3 | 1  | K.EYTEEIER.L                            |
| *             | HsFLAG-RPB5MP_2     | 3.0582 | 0.1397 | 1328.31 | 1328.424 | 5155.6                                                           | 1 | 1084.6 | 80   | 4  | K.NGVYISEENFR.V                         |
| *             | HsFLAG-KIAA0515_    | 5.1219 | 0.2516 | 1673.35 | 1671.929 | 6407.1                                                           | 1 | 1391.9 | 76.9 | 34 | K.LTVQEEQIVELIEK.I                      |
| *             | HsFLAG-KIAA0515_    | 2.5378 | 0.1796 | 1129.42 | 1130.243 | 3469.4                                                           | 1 | 375.8  | 72.2 | 1  | K.IGAVEEELNR.V                          |
| *             | HsFLAG-RPB5MP_2     | 3.7007 | 0.2857 | 1130.19 | 1130.243 | 5310.1                                                           | 1 | 1354.4 | 94.4 | 4  | K.IGAVEEELNR.V                          |
| *             | HsFLAG-KIAA0515_    | 2.5167 | 0.1318 | 1096.5  | 1097.271 | 6053.6                                                           | 4 | 543.2  | 75   | 2  | R.VTELFMDNK.N                           |

|               |                     |        |        |         |          |                                                                                     |   |        |      |                                       |
|---------------|---------------------|--------|--------|---------|----------|-------------------------------------------------------------------------------------|---|--------|------|---------------------------------------|
| *             | HsFLAG-ARP6_Ti_1    | 4.5941 | 0.4132 | 1986.43 | 1985.182 | 9633.9                                                                              | 1 | 1956.1 | 70   | 2 R.VTELFMDNKNELDQCK.S                |
| *             | Hs293Flag-les2_Ti_1 | 6.2264 | 0.5225 | 2211.27 | 2211.471 | 9667.6                                                                              | 1 | 3249.5 | 77.8 | 10 K.LQLVKEEYITSALESTEEL.L            |
| *             | HsFLAG-ARP6_Ti_1    | 5.0683 | 0.3783 | 2212.01 | 2211.471 | 8110.6                                                                              | 1 | 1162.9 | 37.5 | 1 K.LQLVKEEYITSALESTEEL.L             |
| *             | HsFLAG-RPB5MP_2     | 4.6467 | 0.4329 | 2933.22 | 2934.27  | 7798                                                                                | 1 | 1421.8 | 37   | 1 K.LQLVKEEYITSALESTEELHDAASK.L       |
| *             | HsFlag-les6_293_Ti_ | 3.7994 | 0.3777 | 1629.26 | 1629.715 | 7016.4                                                                              | 1 | 1249.7 | 73.1 | 6 K.EEYITSALESTEEL.L                  |
| *             | HsTIP60_Ti_102.148  | 2.7778 | 0.1187 | 1147.45 | 1148.299 | 7319.6                                                                              | 6 | 566.8  | 72.2 | 6 K.LLNTVEETTK.D                      |
| *             | HsTIP60_Ti_102.148  | 3.4118 | 0.2117 | 1147.83 | 1148.299 | 4225.6                                                                              | 1 | 950.3  | 88.9 | 2 K.LLNTVEETTK.D                      |
| *             | HsFlag-les6_293_Ti_ | 4.9945 | 0.3763 | 1642.87 | 1643.753 | 8414.9                                                                              | 1 | 2009.8 | 75   | 33 K.AVDQHNAAEQDIFGK.N                |
| *             | HsFLAG-TCF3_Ti_10   | 4.551  | 0.3772 | 1679.81 | 1679.929 | 5528.1                                                                              | 1 | 912.4  | 69.2 | 16 K.NLNSLFNNMEELIK.D                 |
| *             | HsFlag-FLJ90652_29  | 4.5436 | 0.1865 | 1270.57 | 1270.555 | 10122.4                                                                             | 1 | 1954.7 | 85   | 31 K.TVLQELINVLK.T                    |
| *             | HsFLAG-FLJ20729_    | 3.6589 | 0.2703 | 2159.65 | 2160.615 | 5710.1                                                                              | 1 | 743    | 47.4 | 2 K.TDLLSSLEMILSPTVVSIK.I             |
| *             | HsFLAG-ARP8_Ti_1    | 2.0899 | 0.2354 | 835.35  | 834.945  | 5703                                                                                | 6 | 414.1  | 71.4 | 2 K.TSLTVADK.I                        |
| *             | HsFLAG-RPB5MP_2     | 2.5145 | 0.1827 | 1576.07 | 1576.787 | 6560.3                                                                              | 5 | 702.2  | 57.7 | 1 K.TSLTVADKIEDQKK.E                  |
| *             | HsFLAG-TCF3_Ti_10   | 6.4375 | 0.3959 | 3404.32 | 3405.716 | 11581.9                                                                             | 1 | 1824.9 | 32.1 | 35 K.ELDGFLSILCNLHELQENTICSLVESQK.Q   |
| *             | HsFLAG-FLJ20436_    | 1.9212 | 0.0829 | 896.41  | 896.982  | 7882.1                                                                              | 1 | 954.8  | 83.3 | 1 R.FCALEEK.C                         |
| *             | Hs293Flag-les2_Ti_1 | 5.2854 | 0.2735 | 2143.45 | 2144.356 | 5057.9                                                                              | 1 | 1187.1 | 70.6 | 4 K.CENIQKPLSSVQENIQK.S               |
| *             | HsFLAG-RPB5MP_2     | 4.9439 | 0.4568 | 1533.44 | 1532.573 | 5820.1                                                                              | 1 | 1669.4 | 87.5 | 7 K.FCADSDGFSQELR.N                   |
| *             | HsFLAG-ARP6_Ti_1    | 3.4689 | 0.2991 | 1844.89 | 1846.006 | 9476.9                                                                              | 1 | 845.4  | 57.1 | 10 R.TVYFSEQWVSSLNER.E                |
| *             | HsFLAG-ARP6_Ti_1    | 5.6847 | 0.3762 | 2907.15 | 2907.047 | 9442.5                                                                              | 1 | 1943.6 | 36.5 | 7 R.EQELHNLLEVVSQCCEASSDITEK.S        |
| *             | Hs293Flag-les2_Ti_1 | 3.4903 | 0.253  | 1849.19 | 1848.037 | 4335.9                                                                              | 2 | 378.6  | 57.1 | 1 K.QHNIFLDQMTIDEDK.L                 |
| *             | HsFLAG-RPB5MP_2     | 4.529  | 0.173  | 1499.05 | 1499.748 | 6818.4                                                                              | 1 | 1591.2 | 83.3 | 27 K.LIAQNLELNETIK.I                  |
| *             | HsFLAG-ARP6_Ti_1    | 3.7306 | 0.1746 | 1279.91 | 1280.43  | 6511.4                                                                              | 2 | 1326   | 88.9 | 12 K.LNCFLEQDLK.L                     |
| *             | HsFLAG-RPB5MP_2     | 2.8012 | 0.0962 | 1200.53 | 1199.349 | 4312.7                                                                              | 2 | 683    | 85   | 1 K.LDIPTGTTTPQR.K                    |
| *             | HsFLAG-Lin9_Ti_20   | 2.5771 | 0.1238 | 1199.39 | 1199.392 | 5132.9                                                                              | 3 | 651.9  | 72.2 | 1 K.SYLYPSTLVR.T                      |
| *             | Hs293Flag-les2_Ti_1 | 2.1851 | 0.2436 | 1500.37 | 1501.677 | 4035.1                                                                              | 1 | 289.6  | 54.2 | 1 R.SKVEETTEHLVTK.S                   |
| *             | HsFlag-les6_293_Ti_ | 4.6779 | 0.2924 | 1501.59 | 1501.677 | 7774.1                                                                              | 1 | 2145.1 | 87.5 | 15 R.SKVEETTEHLVTK.S                  |
| gj 4506669 re | 2                   | 29     | 51.80% | 114     | 11514    | 4.3 ribosomal protein P1 isoform 1 [Homo sapiens]                                   |   |        |      |                                       |
|               | HsFLAG-ARP6_Ti_1    | 3.9266 | 0.2884 | 1705.72 | 1703.981 | 4430.2                                                                              | 1 | 618.8  | 60   | 18 K.AAGVNVPEFPWPLFAK.A               |
|               | HsFlag-NUFIP_Ti_10  | 6.097  | 0.513  | 3809.88 | 3811.21  | 10667.4                                                                             | 1 | 1285.5 | 23.8 | 11 EEK.K                              |
| gj 39930355 r | 12                  | 67     | 51.70% | 203     | 23240    | 9 DPCD protein [Homo sapiens]                                                       |   |        |      |                                       |
| *             | HsFlag-DPCD_Ti_20   | 3.0529 | 0.201  | 1203.32 | 1204.414 | 5906.3                                                                              | 2 | 719.1  | 72.2 | 2 R.KVHYLFPDGK.E                      |
| *             | HsFlag-DPCD_Ti_20   | 3.5302 | 0.2407 | 1204.28 | 1204.414 | 7482.9                                                                              | 1 | 1257.6 | 83.3 | 2 R.KVHYLFPDGK.E                      |
| *             | HsFlag-DPCD_Ti_20   | 2.8743 | 0.2585 | 1075.46 | 1076.24  | 4089.4                                                                              | 1 | 492.3  | 68.8 | 9 K.VHYLFPDGK.E                       |
| *             | HsFlag-DPCD_Ti_20   | 2.8855 | 0.1751 | 1075.68 | 1076.24  | 3952.1                                                                              | 1 | 660.9  | 81.2 | 5 K.VHYLFPDGK.E                       |
| *             | HsFlag-DPCD_Ti_20   | 4.9201 | 0.493  | 2990.01 | 2991.432 | 6591.4                                                                              | 1 | 886.4  | 39.7 | 8 K.SALGAMGQWQLEVGDPAPLGAGNLGPELIK.E  |
| *             | HsFlag-DPCD_Ti_20   | 6.3572 | 0.4453 | 2993.04 | 2991.432 | 10144.1                                                                             | 1 | 1732.9 | 31.9 | 23 K.SALGAMGQWQLEVGDPAPLGAGNLGPELIK.E |
| *             | HsFlag-DPCD_Ti_20   | 2.9988 | 0.2372 | 1180.13 | 1179.336 | 5060.3                                                                              | 1 | 723.9  | 83.3 | 2 K.ESNANPIFMR.K                      |
| *             | HsFLAG-TIP49b_Ti_   | 2.1353 | 0.3102 | 1139.79 | 1140.235 | 7888.4                                                                              | 9 | 459.8  | 61.1 | 1 K.DVYSVSVQDK.E                      |
| *             | HsFlag-DPCD_Ti_20   | 2.5012 | 0.1524 | 1092.48 | 1091.252 | 4838.3                                                                              | 2 | 357.7  | 68.8 | 3 K.KFSIPDLDR.H                       |
| *             | HsFlag-DPCD_Ti_20   | 4.8963 | 0.3676 | 2869.63 | 2870.244 | 6257.7                                                                              | 1 | 857.8  | 33.3 | 2 R.HQLPLDDALLSFAHANCTLIISYQK.P       |
| *             | HsFlag-DPCD_Ti_20   | 3.3754 | 0.2447 | 1230.48 | 1231.389 | 5849.4                                                                              | 1 | 665.7  | 75   | 5 K.EVVVAESELQK.E                     |
| *             | HsFlag-DPCD_Ti_20   | 3.725  | 0.2527 | 1231.26 | 1231.389 | 6444.6                                                                              | 1 | 1310   | 85   | 5 K.EVVVAESELQK.E                     |
| gj 13569879 r | 10                  | 107    | 51.50% | 268     | 30692    | 3.8 acidic (leucine-rich) nuclear phosphoprotein 32 family, member E [Homo sapiens] |   |        |      |                                       |

|               |                    |        |        |         |          |        |   |        |      |     |                                                                              |
|---------------|--------------------|--------|--------|---------|----------|--------|---|--------|------|-----|------------------------------------------------------------------------------|
| *             | HsH2AZ-FLAG_293_   | 3.8814 | 0.4179 | 3465.25 | 3466.713 | 8644.5 | 1 | 830.8  | 25.9 | 1   | R.NRSPEEVELVDNCLCVNGEIEGLNDTFK.E                                             |
| *             | HsH2AZ-FLAG_293_   | 5.5787 | 0.4846 | 1910.6  | 1910.193 | 8821.3 | 1 | 2393.7 | 75   | 14  | K.ELEFLSMANVELSSLAR.L                                                        |
| *             | HsH2AZ-FLAG_293_   | 6.9513 | 0.3888 | 2027.87 | 2029.339 | 7369.1 | 1 | 3449.8 | 83.3 | 20  | R.KLELSDNIISGGLEVLAEK.C                                                      |
| *             | HsH2AZ-FLAG_293_   | 6.6681 | 0.2118 | 2030.27 | 2029.339 | 6107.4 | 1 | 3444.5 | 59.7 | 10  | R.KLELSDNIISGGLEVLAEK.C                                                      |
| *             | HsH2AZ-FLAG_293_   | 5.2324 | 0.4269 | 1902.06 | 1901.164 | 6630   | 1 | 1891.6 | 76.5 | 18  | K.LELSDNIISGGLEVLAEK.C                                                       |
| *             | HsH2AZ-FLAG_293_   | 4.4296 | 0.3181 | 1496.51 | 1494.654 | 5467.4 | 1 | 1081.5 | 83.3 | 2   | K.CPNLTYLNLNSGNK.I                                                           |
| *             | HsH2AZ-FLAG_293_   | 3.4931 | 0.1954 | 1330.51 | 1331.509 | 5549.1 | 2 | 525.9  | 63.6 | 2   | K.DLSTVEALQNLK.N                                                             |
| *             | HsH2AZ-FLAG_293_   | 4.9223 | 0.1468 | 1331.31 | 1331.509 | 6288.2 | 1 | 1490.8 | 86.4 | 3   | K.DLSTVEALQNLK.N                                                             |
| *             | HsH2AZ-FLAG_293_   | 6.1031 | 0.4501 | 2002.25 | 2003.139 | 8011   | 1 | 2170.2 | 76.7 | 30  | K.SLDLFNCEITNLEDYR.E                                                         |
| *             | HsH2AZ-FLAG_293_   | 5.8504 | 0.3663 | 3661.28 | 3660.526 | 8235.5 | 1 | 1275.2 | 30.8 | 7   | K.EEIQDEEDDDDYVEEGEEEEEEEEEGGLRGEK.R                                         |
| gi 24041018 r |                    | 9      | 105    | 51.50%  | 169      | 19597  |   |        |      |     | 7.1 ubiquitously-expressed transcript isoform 1 [Homo sapiens]               |
| gi 4759298 re |                    | 9      | 105    | 55.40%  | 157      | 18246  |   |        |      |     | 7.6 ubiquitously-expressed transcript isoform 2 [Homo sapiens]               |
|               | HsFLAG-p53-DNA-D   | 3.6016 | 0.4252 | 1740.3  | 1740.012 | 5732.5 | 1 | 1097.1 | 73.1 | 3   | K.VLRYETFISDVLQR.D                                                           |
|               | HsFlag-NUFIP_Ti_1C | 4.3457 | 0.4019 | 1371.51 | 1371.533 | 6141.2 | 1 | 1310.4 | 85   | 40  | R.YETFISDVLQR.D                                                              |
|               | HsFLAG-p53-DNA-D   | 2.6068 | 0.1816 | 1094.49 | 1094.253 | 6544   | 9 | 476    | 62.5 | 1   | R.DKVYEQLAK.Y                                                                |
|               | HsFlag-NUFIP_Ti_11 | 2.8979 | 0.31   | 2931.18 | 2931.212 | 9848.1 | 1 | 818.4  | 39.6 | 1   | K.HSELYMQVDLGCNFFVDTVPDTSR.I                                                 |
|               | HsFLAG-p53-DNA-D   | 4.1065 | 0.3488 | 1521.53 | 1521.751 | 6485.4 | 1 | 980.7  | 69.2 | 3   | R.KSSLLTELSNSLTK.D                                                           |
|               | HsFLAG-p53-DNA-D   | 2.4989 | 0.184  | 1392.69 | 1393.577 | 5331.7 | 1 | 403.2  | 58.3 | 1   | K.SLLTELSNSLTK.D                                                             |
|               | HsFlag-NUFIP_Ti_1C | 4.9752 | 0.3504 | 1393.46 | 1393.577 | 8384.9 | 1 | 1887.6 | 83.3 | 15  | K.SLLTELSNSLTK.D                                                             |
|               | HsFlag-NUFIP_Ti_11 | 4.0094 | 0.3764 | 1290.53 | 1290.569 | 6238   | 1 | 1412.7 | 85   | 21  | K.AHIHMLLEGLR.E                                                              |
|               | HsFLAG-UTX1_Ti_2i  | 4.097  | 0.2691 | 1675.26 | 1674.856 | 6885.4 | 3 | 593    | 57.7 | 20  | R.ELQGLQNFPEKPHH.-                                                           |
| gi 27734727 r |                    | 13     | 381    | 51.20%  | 244      | 26478  |   |        |      |     | 8.3 hypothetical protein LOC283899 [Homo sapiens]                            |
| *             | HsFlag-FLJ90652_2i | 4.205  | 0.2899 | 1912.97 | 1914.091 | 4151.7 | 1 | 779.5  | 48.1 | 2   | K.FLIYEHECFQEELR.K                                                           |
| *             | HsFlag-FLJ90652_2i | 5.1907 | 0.3809 | 1914.37 | 1914.091 | 8566.7 | 1 | 1996   | 80.8 | 114 | K.FLIYEHECFQEELR.K                                                           |
| *             | HsFlag-FLJ90652_2i | 5.3393 | 0.3415 | 2041.44 | 2042.265 | 8263.3 | 1 | 1524.3 | 71.4 | 102 | K.FLIYEHECFQEELRK.A                                                          |
| *             | HsFlag-FLJ90652_2i | 3.8939 | 0.2307 | 2041.58 | 2042.265 | 4141.7 | 1 | 738    | 46.4 | 6   | K.FLIYEHECFQEELRK.A                                                          |
| *             | HsFLAG-TCF3_Ti_1i  | 5.127  | 0.3969 | 3853.54 | 3853.321 | 4443.5 | 1 | 378.6  | 20.5 | 1   | .Y                                                                           |
| *             | HsFlag-FLJ90652_2i | 4.8437 | 0.3612 | 2526.67 | 2526.938 | 5810.8 | 1 | 671.1  | 50   | 28  | R.YPPFPDYLALQLPEPSLRPK.R                                                     |
| *             | HsFlag-FLJ90652_2i | 5.5464 | 0.448  | 1925.84 | 1926.207 | 7738   | 1 | 1674.9 | 44.4 | 2   | K.MAVGPPDCPVGGPLTFPGR.G                                                      |
| *             | HsFLAG-ARP8_Ti_2i  | 4.857  | 0.5262 | 1926.05 | 1926.207 | 7898.2 | 1 | 1346.4 | 63.9 | 19  | K.MAVGPPDCPVGGPLTFPGR.G                                                      |
| *             | HsFLAG-ARP8_Ti_2i  | 3.1693 | 0.3504 | 1549.74 | 1550.795 | 8032.5 | 1 | 591.9  | 53.1 | 14  | R.GSGAGVGTTLTPLPPPK.M                                                        |
| *             | HsFlag-FLJ90652_2i | 5.0166 | 0.4332 | 1550.62 | 1550.795 | 7569.3 | 1 | 1165.3 | 62.5 | 70  | R.GSGAGVGTTLTPLPPPK.M                                                        |
| *             | HsFLAG-ARP5_Ti_1i  | 4.632  | 0.2678 | 2842.08 | 2841.382 | 5524.7 | 1 | 991    | 31.2 | 3   | R.GSGAGVGTTLTPLPPPKMPPPTILSTVPR.Q                                            |
| *             | HsFlag-FLJ90652_2i | 2.166  | 0.2555 | 1307.73 | 1309.61  | 3409.3 | 1 | 285.9  | 63.6 | 2   | K.MPPPTILSTVPR.Q                                                             |
| *             | HsFlag-FLJ90652_2i | 3.9532 | 0.2593 | 1309.63 | 1309.61  | 3750.3 | 2 | 640.9  | 81.8 | 18  | K.MPPPTILSTVPR.Q                                                             |
| gi 4506643 re |                    | 4      | 7      | 51.10%  | 92       | 10275  |   |        |      |     | 10.4 ribosomal protein L37a [Homo sapiens]                                   |
| *             | HsFLAG-TCF3_Ti_1i  | 2.4549 | 0.1779 | 1053.51 | 1054.235 | 5423   | 1 | 568.9  | 68.8 | 1   | K.KIEISQHAK.Y                                                                |
|               | HsFLAG-TCF3_Ti_1i  | 1.8646 | 0.2098 | 1022.42 | 1023.063 | 6506.6 | 1 | 517.9  | 71.4 | 1   | K.YTCSFCGK.T                                                                 |
| *             | HsFLAG-ARP6_Ti_1i  | 3.6797 | 0.288  | 1405.99 | 1406.575 | 5109.9 | 1 | 1129.4 | 81.8 | 2   | R.AVGIWHCGSCMK.T                                                             |
| *             | HsFLAG-ARP6_Ti_1i  | 4.4349 | 0.4071 | 1828.44 | 1828.032 | 6758.7 | 1 | 991.2  | 58.8 | 3   | K.TVAGGAWTYNTTSAVTVK.S                                                       |
| gi 4506003 re |                    | 15     | 137    | 50.90%  | 330      | 37512  |   |        |      |     | 6.3 protein phosphatase 1, catalytic subunit, alpha isoform 1 [Homo sapiens] |
| *             | HsFLAG-UTX1_Ti_2i  | 3.3467 | 0.154  | 1184.34 | 1184.381 | 6364.3 | 9 | 1446.9 | 85   | 10  | R.LLEVQGSRPGK.N                                                              |
|               | HsFlag-NUFIP_Ti_1C | 5.6621 | 0.4071 | 2196.86 | 2197.623 | 6879.7 | 1 | 1530.1 | 63.9 | 15  | K.SREIFLSQPILLELEAPLK.I                                                      |

|               |                      |        |        |         |          |        |   |        |      |    |                                           |
|---------------|----------------------|--------|--------|---------|----------|--------|---|--------|------|----|-------------------------------------------|
|               | HsFlag-NUFIP_Ti_1C   | 5.5555 | 0.2355 | 2197.28 | 2197.623 | 5469.5 | 1 | 994    | 41.7 | 8  | K.SREIFLSQPILLELEAPLK.I                   |
|               | HsFLAG-UTX1_Ti_2l    | 5.8482 | 0.3752 | 1954.5  | 1954.357 | 3528.8 | 1 | 1020.8 | 78.1 | 26 | R.EIFLSQPILLELEAPLK.I                     |
|               | HsFlag-NUFIP_Ti_1C   | 5.236  | 0.4906 | 2597.77 | 2599.858 | 3690.3 | 1 | 845    | 59.5 | 11 | R.LFEYGGFPPESNYFLGDYVDR.G                 |
|               | HsFLAG-UTX1_Ti_2l    | 3.1849 | 0.2992 | 1553.73 | 1552.818 | 5504.8 | 1 | 712.9  | 70.8 | 6  | K.QSLETICLLLAYK.I                         |
|               | HsFLAG-p53-DNA-D     | 2.758  | 0.1574 | 1441.48 | 1440.728 | 4335.3 | 1 | 826.3  | 80   | 1  | K.IKYPENFFLLR.G                           |
|               | HsFLAG-UTX1_Ti_2l    | 3.0584 | 0.3282 | 1199.35 | 1199.395 | 4678.9 | 1 | 820    | 93.8 | 2  | K.YPENFFLLR.G                             |
|               | HsFlag-NUFIP_Ti_1C   | 5.4504 | 0.4606 | 2114.06 | 2115.32  | 6688.8 | 1 | 1505.3 | 70.6 | 19 | K.TFTDCFNCLPIAAIVDEK.I                    |
|               | HsFlag-NUFIP_Ti_1C   | 5.5834 | 0.4263 | 2249.12 | 2249.479 | 7631.2 | 1 | 1500.9 | 61.1 | 13 | K.IFCHGGLSPDLQSMQIR.R                     |
|               | HsFlag-NUFIP_Ti_1C   | 4.7195 | 0.3543 | 2249.42 | 2249.479 | 8083.2 | 1 | 1565.6 | 43.1 | 6  | K.IFCHGGLSPDLQSMQIR.R                     |
|               | HsFlag-NUFIP_Ti_1C   | 3.2996 | 0.1719 | 2686.23 | 2686.018 | 8541.8 | 2 | 442.3  | 36.4 | 1  | R.IMRPTDVPDQGLLCDLLWSDPK.D                |
|               | HsFLAG-p53-DNA-D     | 4.5257 | 0.4111 | 1641.05 | 1640.792 | 7920.9 | 1 | 2058   | 80.8 | 15 | R.AHQVVEDGYEFFAK.R                        |
|               | HsFLAG-p53-DNA-D     | 3.9193 | 0.406  | 1914.81 | 1915.162 | 8182.1 | 1 | 516.1  | 47.1 | 2  | K.YGQFSGLNPGGRRPITPPR.N                   |
|               | HsFLAG-p53-DNA-D     | 4.1049 | 0.2606 | 1915.58 | 1915.162 | 5537.8 | 1 | 782.9  | 36.8 | 2  | K.YGQFSGLNPGGRRPITPPR.N                   |
| gi 13129110 r |                      | 13     | 117    | 50.60%  | 342      | 36724  |   |        |      |    | 5.2 methylosome protein 50 [Homo sapiens] |
| *             | HsFLAG-ARP6_Ti_1     | 2.9544 | 0.1777 | 1373.27 | 1373.638 | 8127.2 | 4 | 697.7  | 58.3 | 2  | R.KETPPPLVPPAAR.E                         |
| *             | HsFLAG-ARP6_Ti_1     | 4.9949 | 0.2947 | 1722.78 | 1723.927 | 5089.5 | 1 | 1496.9 | 75   | 13 | R.YRSDGALLLGASSLSGR.C                     |
| *             | HsFLAG-ARP6_Ti_1     | 3.6178 | 0.1857 | 1723.5  | 1723.927 | 7770.3 | 1 | 1382.5 | 42.2 | 2  | R.YRSDGALLLGASSLSGR.C                     |
| *             | HsFLAG-Lin9_Ti_20    | 4.3676 | 0.4338 | 1403.43 | 1404.563 | 8482.1 | 1 | 1491.1 | 67.9 | 7  | R.SDGALLLGASSLSGR.C                       |
| *             | HsFlag-FLJ90652_2    | 3.3379 | 0.2765 | 1268.83 | 1268.467 | 5829.1 | 1 | 1128.5 | 88.9 | 11 | R.CWAGSLWLFK.D                            |
| *             | HsFlag-NUFIP_Ti_11   | 3.0742 | 0.2816 | 2788.7  | 2789.109 | 8975.6 | 2 | 407.9  | 30   | 1  | R.GILVASDSGAVELWELDENETLIVSK.F            |
| *             | HsFlag-FLJ90652_2    | 6.5755 | 0.5295 | 2466.79 | 2467.649 | 9912.9 | 1 | 2364.2 | 58.7 | 27 | K.YEHDDIVSTVSVLSSGTQAVSGSK.D              |
| *             | HsFlag-FLJ90652_2    | 4.8468 | 0.0903 | 1664.68 | 1664.902 | 7203.1 | 1 | 2355.3 | 84.6 | 11 | K.VWDLAQQVVLSSYR.A                        |
| *             | HsFlag-VPS71_Ti_1C   | 3.7869 | 0.4554 | 1547.67 | 1548.708 | 5626.6 | 1 | 661.6  | 57.1 | 10 | R.AHAAQVTCVAASPHK.D                       |
| *             | HsFLAG-ARP6_Ti_1     | 5.447  | 0.4686 | 1548.15 | 1548.708 | 9133.1 | 1 | 2771.1 | 82.1 | 28 | R.AHAAQVTCVAASPHK.D                       |
| *             | HsFlag-FLJ90652_2    | 3.5338 | 0.3614 | 1548.93 | 1548.708 | 6829.3 | 1 | 1291.4 | 50   | 1  | R.AHAAQVTCVAASPHK.D                       |
| *             | HsFlag-les6_293_Ti_1 | 3.7432 | 0.4088 | 1429.4  | 1429.449 | 5136.3 | 1 | 914.5  | 77.3 | 1  | K.DSVFLSCSEDNR.I                          |
| *             | HsFlag-FLJ90652_2    | 4.638  | 0.2938 | 4492.51 | 4492.909 | 6230.5 | 1 | 423.7  | 20.1 | 3  | DTK.S                                     |
| gi 11321634 r |                      | 29     | 59     | 50.10%  | 639      | 71451  |   |        |      |    | 6.4 CD2-associated protein [Homo sapiens] |
| *             | HsFlag-FLJ90652_2    | 3.7039 | 0.252  | 1758.91 | 1758.929 | 9877   | 1 | 1756.5 | 71.4 | 2  | K.KLQEEGWLEGEINGR.R                       |
| *             | HsFlag-FLJ90652_2    | 3.5643 | 0.2448 | 1081.49 | 1081.22  | 7655.6 | 1 | 1931.8 | 94.4 | 2  | R.HGNVASLVQR.I                            |
| *             | HsFlag-FLJ90652_2    | 2.8391 | 0.3715 | 1865.42 | 1866.127 | 4272.1 | 1 | 428.4  | 52.9 | 2  | R.ISTYGLPAGGIQPHQTK.N                     |
| *             | HsFlag-FLJ90652_2    | 4.1123 | 0.255  | 1979.01 | 1980.222 | 3606.4 | 1 | 580.3  | 63.3 | 1  | K.VLFEYIPQNEDELELK.V                      |
| *             | HsFlag-FLJ90652_2    | 4.7784 | 0.3996 | 2619.08 | 2618.816 | 9247.3 | 1 | 924.5  | 45.5 | 5  | K.VGDIIDINEEVEEGWWSGTLNKK.L               |
| *             | HsFlag-FLJ90652_2    | 2.0618 | 0.1549 | 1121.47 | 1122.353 | 6081.1 | 4 | 479.3  | 66.7 | 1  | K.LGLFPSNFVK.E                            |
| *             | HsFlag-FLJ90652_2    | 2.0037 | 0.2865 | 953.34  | 954.114  | 5796.7 | 4 | 481.7  | 68.8 | 1  | R.GIGFGDIFK.E                             |
| *             | HsFlag-FLJ90652_2    | 4.0956 | 0.389  | 1537.43 | 1537.664 | 9576.7 | 1 | 1974.3 | 76.9 | 2  | K.TQSVEITKTDTTEGK.I                       |
| *             | HsFlag-FLJ90652_2    | 3.107  | 0.1414 | 1877.99 | 1879.03  | 8876.2 | 1 | 796.9  | 56.7 | 1  | R.TLFAYEGTNEDELTFK.E                      |
| *             | HsFlag-FLJ90652_2    | 2.1473 | 0.2138 | 1138.5  | 1139.337 | 2485.9 | 2 | 264.1  | 66.7 | 1  | K.EGEIHLISK.E                             |
| *             | HsFlag-FLJ90652_2    | 3.2108 | 0.2032 | 1139.13 | 1139.337 | 4922   | 1 | 772.5  | 83.3 | 2  | K.EGEIHLISK.E                             |
| *             | HsFlag-FLJ90652_2    | 4.1858 | 0.3198 | 1935.83 | 1936.128 | 6754.4 | 1 | 891.4  | 62.5 | 1  | K.EGVFPDNFAVQINELDK.D                     |
| *             | HsFlag-FLJ90652_2    | 2.6563 | 0.1831 | 1334.51 | 1335.586 | 4192.2 | 1 | 298.6  | 45.8 | 2  | K.APAPKPELIAAEK.K                         |
| *             | HsFlag-FLJ90652_2    | 3.0491 | 0.3717 | 1335.22 | 1335.586 | 6283.7 | 1 | 1102.8 | 79.2 | 2  | K.APAPKPELIAAEK.K                         |
| *             | HsFlag-FLJ90652_2    | 3.3928 | 0.331  | 1512.47 | 1513.687 | 3449   | 1 | 414.9  | 77.3 | 2  | K.YFSLKPEEKDEK.S                          |

|               |                    |        |        |         |          |         |                                                                |        |      |                                           |
|---------------|--------------------|--------|--------|---------|----------|---------|----------------------------------------------------------------|--------|------|-------------------------------------------|
| *             | HsFlag-FLJ90652_2  | 3.6498 | 0.3199 | 1903.54 | 1904.217 | 5498.5  | 1                                                              | 650.2  | 52.9 | 2 K.STLEQKPSKPAAPQVPPK.K                  |
| *             | HsFlag-FLJ90652_2  | 3.097  | 0.289  | 904.98  | 905.085  | 4923.7  | 1                                                              | 1260.5 | 87.5 | 4 K.PAAPQVPPK.K                           |
| *             | HsFlag-FLJ90652_2  | 2.8534 | 0.1406 | 1121.17 | 1121.233 | 5158.7  | 2                                                              | 786.2  | 80   | 2 K.INGEVSSISSK.F                         |
| *             | HsFlag-FLJ90652_2  | 2.0888 | 0.1283 | 936.3   | 937.037  | 5132    | 5                                                              | 560.7  | 78.6 | 1 K.FETEPVSK.L                            |
| *             | HsFlag-FLJ90652_2  | 4.0384 | 0.2397 | 1537.55 | 1537.843 | 7575.5  | 2                                                              | 1130.9 | 70.8 | 2 K.LKLDSEQLPLRPK.S                       |
| *             | HsFlag-FLJ90652_2  | 3.3293 | 0.2776 | 1139.11 | 1139.251 | 4591.2  | 2                                                              | 920.4  | 88.9 | 2 K.SVDFDSLTVR.T                          |
| *             | HsFlag-FLJ90652_2  | 4.1067 | 0.327  | 2799.35 | 2800.054 | 6568.6  | 1                                                              | 483.6  | 39.6 | 3 K.ETDVVNFDDIASSENLLHLTANRPK.M           |
| *             | HsFlag-FLJ90652_2  | 3.8403 | 0.2087 | 2800.24 | 2800.054 | 6149.8  | 9                                                              | 512.2  | 28.1 | 2 K.ETDVVNFDDIASSENLLHLTANRPK.M           |
| *             | HsFlag-FLJ90652_2  | 2.3463 | 0.311  | 1394.63 | 1395.474 | 2900.4  | 1                                                              | 425.1  | 66.7 | 2 R.FNGGHSPHSPK.I                         |
| *             | HsFlag-FLJ90652_2  | 3.2109 | 0.3151 | 1394.83 | 1395.474 | 5184.6  | 1                                                              | 1038.8 | 83.3 | 2 R.FNGGHSPHSPK.I                         |
| *             | HsFlag-FLJ90652_2  | 2.6393 | 0.1818 | 1244.13 | 1244.387 | 6493.7  | 6                                                              | 460.7  | 65   | 1 K.LPKEEDSANLK.P                         |
| *             | HsFlag-FLJ90652_2  | 3.5642 | 0.2456 | 1418.56 | 1419.661 | 4479.2  | 1                                                              | 812.2  | 70.8 | 2 K.ANTTAFLTPEIK.A                        |
| *             | HsFlag-FLJ90652_2  | 3.0061 | 0.2024 | 1419.56 | 1419.661 | 5373.1  | 8                                                              | 372.8  | 54.2 | 3 K.ANTTAFLTPEIK.A                        |
| *             | HsFlag-FLJ90652_2  | 5.2325 | 0.3677 | 1741.54 | 1742.119 | 8305    | 1                                                              | 2221.6 | 78.6 | 4 R.AQIHELLCIVEALKK.D                     |
| gi 5031753 re | 17                 | 276    | 50.10% | 449     | 49229    | 6.3     | heterogeneous nuclear ribonucleoprotein H1 [Homo sapiens]      |        |      |                                           |
| *             | HsFLAG-ARP6_Ti_1   | 3.7624 | 0.4423 | 1505.34 | 1505.593 | 2869.7  | 1                                                              | 513.9  | 79.2 | 4 R.GLPWSCSADEVQR.F                       |
| *             | HsFLAG-Lin9_Ti_20  | 4.9901 | 0.365  | 2106.93 | 2108.223 | 9811.8  | 1                                                              | 1423.9 | 58.3 | 6 R.EGRPSGEAFVELESEDEVK.L                 |
| *             | HsFLAG-Lin9_Ti_20  | 4.61   | 0.2933 | 1685.59 | 1685.75  | 7123.9  | 1                                                              | 2387.3 | 56.7 | 4 K.HTGPNSPDTANDGFVR.L                    |
| *             | HsFlag-NUFIP_Ti_1C | 4.405  | 0.4586 | 1685.6  | 1685.75  | 7380.1  | 1                                                              | 1743.8 | 76.7 | 40 K.HTGPNSPDTANDGFVR.L                   |
| *             | HsFLAG-p53-DNA-D   | 5.0196 | 0.3656 | 3751.9  | 3753.256 | 6508.1  | 1                                                              | 798.3  | 27.3 | 12 R.GLPFGCSKEEIVQFFSGLIIVPNGITLPVDFQGR.S |
| *             | HsFLAG-Lin9_Ti_20  | 4.069  | 0.3865 | 2904.99 | 2906.308 | 6477.3  | 1                                                              | 707.6  | 42   | 7 K.EEIVQFFSGLIIVPNGITLPVDFQGR.S          |
| *             | HsFLAG-FLJ20309_   | 5.6045 | 0.4433 | 1844.33 | 1843     | 8624.1  | 1                                                              | 2117.4 | 71.9 | 80 R.STGEAFVQFASQEIIEK.A                  |
| *             | HsMRGBP-FLAG_Ti    | 4.3303 | 0.4165 | 2718.67 | 2718.681 | 9763.2  | 1                                                              | 1215.5 | 42   | 3 R.GAYGGGGYDDYNGYNDGYGFGSDR.F            |
| *             | HsFLAG-ARP6_Ti_1   | 3.8358 | 0.4546 | 1603.44 | 1602.684 | 8040.3  | 1                                                              | 1209.8 | 75   | 3 R.DLNYCFSGMSDHR.Y                       |
| *             | HsFLAG-TIP49b_Ti_  | 4.8986 | 0.4988 | 2098.23 | 2099.208 | 10937   | 1                                                              | 1226   | 50   | 9 R.YDGGGSTFQSTTGHCVHMR.G                 |
| *             | HsFLAG-TIP49b_Ti_  | 4.12   | 0.2675 | 2100.88 | 2099.208 | 6114.4  | 1                                                              | 952    | 40.3 | 2 R.YDGGGSTFQSTTGHCVHMR.G                 |
| *             | HsH2AZ-FLAG_293_   | 5.0454 | 0.3774 | 1997.32 | 1998.202 | 8397.3  | 1                                                              | 1161   | 59.4 | 53 R.ATENDIYNFFSPLNPVR.V                  |
| *             | HsYL1_Ti_102.2959. | 5.4927 | 0.2675 | 1998.86 | 1998.202 | 7998.6  | 1                                                              | 1939.6 | 48.4 | 8 R.ATENDIYNFFSPLNPVR.V                   |
| *             | HsFLAG-TCF3_Ti_10  | 2.9392 | 0.214  | 1092.51 | 1093.228 | 6901.6  | 1                                                              | 869.9  | 72.2 | 12 R.VHIEIGPDGR.V                         |
| *             | HsFLAG-ARP6_Ti_1   | 3.664  | 0.2731 | 1093.44 | 1093.228 | 6216    | 1                                                              | 1638.1 | 88.9 | 29 R.VHIEIGPDGR.V                         |
| *             | HsFLAG-ARP6_Ti_1   | 3.4299 | 0.2344 | 2179.67 | 2179.363 | 7635.4  | 1                                                              | 570.7  | 40   | 1 R.VTGEADVEFATHEDAVAAMSK.D               |
| *             | HsFLAG-Lin9_Ti_20  | 3.8129 | 0.4321 | 2145.76 | 2143.32  | 10008.2 | 1                                                              | 1225.5 | 52.6 | 3 R.YVELFLNSTAGASGGAYEHR.Y                |
| gi 24307939 r | 19                 | 153    | 49.90% | 541     | 59671    | 5.6     | chaperonin containing TCP1, subunit 5 (epsilon) [Homo sapiens] |        |      |                                           |
| *             | HsFLAG-ARP5_Ti_1   | 4.3097 | 0.3774 | 3114.49 | 3115.375 | 8537.2  | 1                                                              | 800.3  | 37.9 | 2 K.SQDDEIGDGTGVVVLGALLEEAEQLLDR.G        |
| *             | HsFLAG-ARP6_Ti_1   | 3.536  | 0.3352 | 1095.38 | 1094.169 | 5306.7  | 1                                                              | 1224.5 | 94.4 | 2 R.IADGYEQAR.V                           |
| *             | HsFLAG-ARP5_Ti_1   | 7.9511 | 0.5084 | 3091.42 | 3092.557 | 8904.4  | 1                                                              | 2236.1 | 37   | 7 R.VAIEHLDKISDSVLVDIKDTEPLIQTAK.T        |
| *             | HsFLAG-ARP6_Ti_1   | 4.9144 | 0.3608 | 2185.42 | 2186.508 | 7734.1  | 1                                                              | 1098.2 | 52.6 | 11 K.ISDSVLVDIKDTEPLIQTAK.T               |
| *             | HsFLAG-ARP6_Ti_1   | 4.8386 | 0.3304 | 2185.75 | 2186.508 | 5785.9  | 1                                                              | 1436.3 | 44.7 | 4 K.ISDSVLVDIKDTEPLIQTAK.T                |
| *             | HsFLAG-ARP6_Ti_1   | 3.7823 | 0.4109 | 1961.32 | 1962.287 | 10546.1 | 1                                                              | 1391.5 | 58.8 | 2 R.QMAEIAVNAVLTADMER.R                   |
| *             | HsFLAG-ARP6_Ti_1   | 4.5199 | 0.2887 | 1392.06 | 1392.592 | 9176.8  | 1                                                              | 2235.6 | 86.4 | 9 R.DVDFELIKVEGK.V                        |
| *             | HsFLAG-ARP5_Ti_1   | 4.5222 | 0.3882 | 1698.53 | 1698.978 | 6774.1  | 1                                                              | 1223   | 67.9 | 4 K.GVIVDKDFSHPPMPK.K                     |
| *             | HsFLAG-ARP6_Ti_1   | 3.4756 | 0.3223 | 1610.57 | 1611.931 | 5815.9  | 1                                                              | 931.3  | 69.2 | 12 K.IAILTCPFEPKPK.T                      |
| *             | HsFLAG-ARP6_Ti_1   | 3.9102 | 0.408  | 1434.24 | 1434.589 | 5229.1  | 1                                                              | 1418.6 | 90.9 | 6 K.HKLDVTSVEDYK.A                        |

|                |                     |        |        |         |          |                                                                             |   |        |      |    |                                          |
|----------------|---------------------|--------|--------|---------|----------|-----------------------------------------------------------------------------|---|--------|------|----|------------------------------------------|
| *              | HsFLAG-ARP5_Ti_1    | 3.8361 | 0.1932 | 1845.4  | 1844.133 | 9809.6                                                                      | 1 | 1349.3 | 65.4 | 2  | K.YEKEKFEEMIQQIK.E                       |
| *              | HsFLAG-ARP6_Ti_1    | 5.3402 | 0.452  | 3381.82 | 3381.695 | 6286.6                                                                      | 1 | 782.7  | 29.3 | 7  | K.ETGANLAICQWGFDDDEANHLLLQNNLPAVR.W      |
| *              | HsFLAG-ARP6_Ti_1    | 4.8768 | 0.3935 | 1739.89 | 1740.012 | 7856.7                                                                      | 1 | 1780.2 | 68.8 | 32 | R.WVGGPEIELIAIATGGR.I                    |
| *              | HsFLAG-ARP6_Ti_1    | 5.9317 | 0.3513 | 1668.4  | 1668.93  | 6659.7                                                                      | 1 | 1848.3 | 76.7 | 35 | K.LGFAGLVQEISFGTTK.D                     |
| *              | HsFLAG-ARP6_Ti_1    | 2.4022 | 0.0844 | 1020.37 | 1021.226 | 8736.8                                                                      | 3 | 813.6  | 78.6 | 2  | K.MLVIEQCK.N                             |
| *              | HsFLAG-ARP6_Ti_1    | 5.44   | 0.4302 | 2196    | 2196.385 | 7286                                                                        | 1 | 1576.6 | 57.1 | 9  | R.VVYGGGAAEISCALAVSQEADK.C               |
| *              | HsFLAG-ARP6_Ti_1    | 3.4942 | 0.1261 | 1405.83 | 1403.683 | 7009.5                                                                      | 5 | 775.4  | 68.2 | 3  | K.KQQISLATQMVR.M                         |
| *              | HsFLAG-ARP6_Ti_1    | 2.8812 | 0.2091 | 1277.13 | 1275.509 | 4923.5                                                                      | 1 | 620.8  | 80   | 1  | K.QQISLATQMVR.M                          |
| *              | HsFLAG-ARP6_Ti_1    | 3.3263 | 0.1936 | 1388.39 | 1388.474 | 6014.9                                                                      | 1 | 801.5  | 77.3 | 3  | K.IDDIRKPGESE.-                          |
| gij 14043072 r | 16                  | 184    | 49.90% | 353     | 37430    | 8.9 heterogeneous nuclear ribonucleoprotein A2/B1 isoform B1 [Homo sapiens] |   |        |      |    |                                          |
| gij 4504447 re | 16                  | 184    | 51.60% | 341     | 36006    | 8.6 heterogeneous nuclear ribonucleoprotein A2/B1 isoform A2 [Homo sapiens] |   |        |      |    |                                          |
|                | HsFLAG-p53-DNA-D    | 4.236  | 0.1789 | 1928.37 | 1928.192 | 9741.4                                                                      | 1 | 2229.2 | 71.9 | 1  | R.KLFIGGLSFETTEESLR.N                    |
|                | HsFLAG-p53-DNA-D    | 4.9264 | 0.3623 | 1799.62 | 1800.018 | 6865.5                                                                      | 1 | 2312.6 | 83.3 | 71 | K.LFIGGLSFETTEESLR.N                     |
|                | HsFLAG-p53-DNA-D    | 2.5801 | 0.1913 | 1087.5  | 1088.164 | 4499.2                                                                      | 2 | 316.7  | 71.4 | 4  | R.NYYEQWGK.L                             |
|                | HsFLAG-TIP49b_Ti_   | 3.3037 | 0.2301 | 1492.41 | 1492.697 | 3937.7                                                                      | 4 | 527.4  | 70.8 | 5  | K.LTDCVVMRDPASK.R                        |
|                | HsFlag-NUFIP_Ti_1C  | 3.3412 | 0.165  | 1338.85 | 1339.491 | 4277.7                                                                      | 1 | 568.5  | 70.8 | 9  | R.EESGKPGAHVTVK.K                        |
|                | HsFLAG-p53-DNA-D    | 4.7769 | 0.3184 | 2220.9  | 2221.425 | 8609.6                                                                      | 1 | 1331.9 | 58.8 | 2  | R.DYFEEYGKIDTIEIITDR.Q                   |
|                | HsFLAG-Lin9_Ti_20   | 4.1113 | 0.1557 | 1189.29 | 1189.351 | 7603.1                                                                      | 1 | 1651.4 | 94.4 | 3  | K.IDTIEIITDR.Q                           |
|                | HsFLAG-p53-DNA-D    | 3.7564 | 0.3059 | 1852.69 | 1853.001 | 5432.1                                                                      | 1 | 545.7  | 56.7 | 11 | K.RGFGFVTFDDHDPVDK.I                     |
|                | HsFLAG-Lin9_Ti_20   | 3.6608 | 0.3204 | 1853.33 | 1853.001 | 5722.5                                                                      | 1 | 799.2  | 41.7 | 2  | K.RGFGFVTFDDHDPVDK.I                     |
|                | HsFlag-NUFIP_Ti_1C  | 4.5037 | 0.4279 | 1697.53 | 1696.813 | 7705.8                                                                      | 1 | 1860.9 | 78.6 | 24 | R.GFGFVTFDDHDPVDK.I                      |
|                | HsFLAG-p53-DNA-D    | 4.0483 | 0.2555 | 1411.43 | 1411.52  | 8531.2                                                                      | 1 | 2107.3 | 86.4 | 14 | K.YHTINGHNAEVR.K                         |
|                | HsFLAG-Lin9_Ti_20   | 2.9009 | 0.0866 | 1541.14 | 1539.694 | 9347.2                                                                      | 1 | 1622.9 | 75   | 1  | K.YHTINGHNAEVRK.A                        |
|                | HsFLAG-p53-DNA-D    | 2.7455 | 0.1418 | 1014.08 | 1014.042 | 5903                                                                        | 1 | 1365.9 | 83.3 | 1  | R.GGNFGFGDSR.G                           |
|                | HsFLAG-FLJ20309_    | 3.0826 | 0.2506 | 1377.87 | 1378.447 | 6297.5                                                                      | 1 | 744    | 64.3 | 15 | R.GGGNFGPGPGSNFR.G                       |
|                | HsFlag-VPS71_Ti_1C  | 5.1533 | 0.4558 | 2496.25 | 2496.53  | 8726.7                                                                      | 1 | 752.6  | 35.2 | 7  | R.GFGDGYNGYGGGPGGGNFGGSPGYGGGR.G         |
|                | HsFLAG-ARP6_Ti_1    | 5.6933 | 0.5452 | 2190.52 | 2191.255 | 6832.1                                                                      | 1 | 1831.9 | 62.5 | 14 | R.NMGGPYGGGNYGPGGSGGGYGGGR.S             |
| gij 4757718 re | 28                  | 513    | 49.40% | 429     | 47461    | 5.6 actin-like 6A isoform 1 [Homo sapiens]                                  |   |        |      |    |                                          |
|                | HsH2AZ-FLAG_293_    | 2.1579 | 0.2779 | 1067.29 | 1068.094 | 7909.3                                                                      | 3 | 634.3  | 61.1 | 1  | R.AGYAGEDCPK.V                           |
|                | HsFlag-VPS71_Ti_1C  | 2.5094 | 0.1996 | 1070.75 | 1068.094 | 5449.1                                                                      | 3 | 825    | 77.8 | 1  | R.AGYAGEDCPK.V                           |
| *              | HsFlag-VPS71_Ti_1C  | 5.03   | 0.4726 | 2485    | 2483.765 | 5616.4                                                                      | 1 | 769.2  | 47.7 | 4  | R.AGYAGEDCPKVDFPTAIGMVVER.D              |
| *              | HsMRGBP-FLAG_Ti_    | 4.7807 | 0.3838 | 3861.37 | 3861.207 | 6909.4                                                                      | 1 | 779.1  | 23.6 | 1  | R.AGYAGEDCPKVDFPTAIGMVVERDDGSTLMEIDGDK.G |
| *              | HsMRGBP-FLAG_Ti_    | 4.2408 | 0.2847 | 1434.41 | 1434.693 | 6290.9                                                                      | 1 | 1601.9 | 83.3 | 11 | K.VDFPTAIGMVVER.D                        |
| *              | HsFLAG-TIP49a_Ti_   | 2.5735 | 0.25   | 2810.79 | 2812.136 | 4717.1                                                                      | 2 | 213.9  | 32   | 1  | K.VDFPTAIGMVVERDDGSTLMEIDGDK.G           |
|                | HsFlag-les6_293_Ti_ | 4.3588 | 0.4624 | 1397.58 | 1396.466 | 5423.6                                                                      | 1 | 1184.3 | 83.3 | 8  | R.DDGSTLMEIDGDK.G                        |
|                | HsSrcap_Ti_202.218  | 3.7517 | 0.3845 | 1569.31 | 1569.714 | 6391.4                                                                      | 1 | 799.2  | 69.2 | 25 | K.QGGPTYIIDTNALR.V                       |
|                | HsH2AZ-FLAG_293_    | 2.8551 | 0.2342 | 1131.4  | 1132.317 | 3196.2                                                                      | 2 | 348.8  | 72.2 | 3  | R.ENMEAISPLK.N                           |
|                | HsTIP60_Ti_102.179  | 3.1045 | 0.1289 | 1132.93 | 1132.317 | 5415.7                                                                      | 8 | 881    | 83.3 | 1  | R.ENMEAISPLK.N                           |
|                | HsMRGBP-FLAG_Ti_    | 5.3471 | 0.4482 | 2270.18 | 2270.478 | 9066.5                                                                      | 1 | 2474.2 | 69.4 | 74 | K.NGMVEDWDSFQAILDHTYK.M                  |
|                | HsFlag-VPS71_Ti_1C  | 3.6371 | 0.2876 | 2270.92 | 2270.478 | 3558.4                                                                      | 2 | 499.2  | 38.9 | 1  | K.NGMVEDWDSFQAILDHTYK.M                  |
|                | HsFLAG-TIP49a_Ti_   | 4.8402 | 0.4595 | 2026.73 | 2026.274 | 4015                                                                        | 1 | 688.3  | 58.8 | 41 | K.SEASLHPVLMSEAPWNTR.A                   |
|                | HsMRGBP-FLAG_Ti_    | 4.9182 | 0.2749 | 2026.88 | 2026.274 | 5447.7                                                                      | 1 | 1114.8 | 44.1 | 14 | K.SEASLHPVLMSEAPWNTR.A                   |
|                | HsYL1_Ti_106.2799.  | 3.0549 | 0.3073 | 2531.72 | 2531.938 | 6243.4                                                                      | 1 | 650.8  | 44.7 | 1  | R.EKLTELMFEHYNIPAFFLCK.T                 |



|               |                    |        |        |         |          |        |                                                                        |        |      |    |                                   |
|---------------|--------------------|--------|--------|---------|----------|--------|------------------------------------------------------------------------|--------|------|----|-----------------------------------|
|               | HsFLAG-ARP5_Ti_1   | 3.6736 | 0.1071 | 2532.39 | 2531.938 | 5732.9 | 7                                                                      | 485.8  | 30.3 | 1  | R.EKLTLMFEHYNIPAFFLCK.T           |
|               | HsFLAG-ARP8_Ti_2   | 4.5023 | 0.2315 | 2274.41 | 2274.648 | 4837.7 | 1                                                                      | 981.6  | 45.6 | 6  | K.LTELMFEHYNIPAFFLCK.T            |
|               | HsFLAG-TIP49a_Ti_  | 5.5797 | 0.3831 | 2274.58 | 2274.648 | 5501.9 | 1                                                                      | 1243.3 | 64.7 | 51 | K.LTELMFEHYNIPAFFLCK.T            |
|               | HsFLAG-TIP49b_Ti_  | 2.8957 | 0.2638 | 1120.59 | 1121.282 | 3394.4 | 1                                                                      | 218.4  | 65   | 7  | K.TAVLTAFANGR.S                   |
|               | HsTIP60_Ti_104.185 | 3.8654 | 0.3093 | 1121.27 | 1121.282 | 7947.3 | 1                                                                      | 1548.4 | 85   | 31 | K.TAVLTAFANGR.S                   |
|               | HsFlag-VPS71_Ti_1C | 4.3694 | 0.3819 | 3093.2  | 3093.507 | 7439.5 | 1                                                                      | 615    | 34.5 | 29 | R.STGLILDGATHHTAIPVHDGYVLQQGIVK.S |
|               | HsH2AZ-FLAG_293_   | 7.5475 | 0.3819 | 3094.53 | 3093.507 | 8476.8 | 1                                                                      | 3060.2 | 40.5 | 97 | R.STGLILDGATHHTAIPVHDGYVLQQGIVK.S |
|               | HsMRGBP-FLAG_Ti_   | 2.52   | 0.3586 | 1496.59 | 1496.687 | 3562.4 | 1                                                                      | 236.9  | 54.2 | 5  | K.SPLAGDFITMQCR.E                 |
|               | HsFlag-VPS71_Ti_1C | 4.8455 | 0.3964 | 1496.81 | 1496.687 | 6966.3 | 1                                                                      | 1826   | 83.3 | 44 | K.SPLAGDFITMQCR.E                 |
|               | HsFlag-VPS71_Ti_1C | 3.4625 | 0.1868 | 2253.98 | 2253.677 | 3704.1 | 1                                                                      | 506.4  | 52.8 | 2  | R.ELFQEMNIELVPPYMIASK.E           |
|               | HsScrap_Ti_102.226 | 3.1132 | 0.3386 | 1315.37 | 1316.497 | 5047   | 1                                                                      | 924.6  | 72.7 | 11 | K.IPEGLFDPSNVK.G                  |
|               | HsTIP60_Ti_105.208 | 3.5991 | 0.3139 | 1317.25 | 1316.497 | 4309   | 1                                                                      | 760.1  | 77.3 | 29 | K.IPEGLFDPSNVK.G                  |
|               | HsFlag-VPS71_Ti_1C | 3.2874 | 0.247  | 1131.59 | 1131.274 | 3714   | 1                                                                      | 681.8  | 88.9 | 13 | K.LIANNTTVER.R                    |
| gi 4506007 re | 14                 | 126    | 48.90% | 323     | 36984    | 6.5    | protein phosphatase 1, catalytic subunit, gamma isoform [Homo sapiens] |        |      |    |                                   |
| *             | HsFLAG-Lin9_Ti_20% | 3.5746 | 0.1427 | 1071.47 | 1072.25  | 7639.3 | 2                                                                      | 1467.9 | 93.8 | 1  | K.LNIDSIIQR.L                     |
| *             | HsFLAG-Lin9_Ti_20% | 3.5073 | 0.2193 | 1243.27 | 1243.362 | 8858.7 | 1                                                                      | 1467.3 | 83.3 | 2  | K.NVQLQENEIR.G                    |
|               | HsFlag-NUFIP_Ti_1C | 5.6621 | 0.4071 | 2196.86 | 2197.623 | 6879.7 | 1                                                                      | 1530.1 | 63.9 | 15 | K.SREIFLSQPILLELEAPLK.I           |
|               | HsFlag-NUFIP_Ti_1C | 5.5555 | 0.2355 | 2197.28 | 2197.623 | 5469.5 | 1                                                                      | 994    | 41.7 | 8  | K.SREIFLSQPILLELEAPLK.I           |
|               | HsFLAG-UTX1_Ti_2i  | 5.8482 | 0.3752 | 1954.5  | 1954.357 | 3528.8 | 1                                                                      | 1020.8 | 78.1 | 26 | R.EIFLSQPILLELEAPLK.I             |
|               | HsFlag-NUFIP_Ti_1C | 5.236  | 0.4906 | 2597.77 | 2599.858 | 3690.3 | 1                                                                      | 845    | 59.5 | 11 | R.LFEYGGFPESNYLFLGDYVDR.G         |
|               | HsFLAG-UTX1_Ti_2i  | 3.1849 | 0.2992 | 1553.73 | 1552.818 | 5504.8 | 1                                                                      | 712.9  | 70.8 | 6  | K.QSLETICLLLAYK.I                 |
|               | HsFLAG-p53-DNA-D   | 2.758  | 0.1574 | 1441.48 | 1440.728 | 4335.3 | 1                                                                      | 826.3  | 80   | 1  | K.IKYPENFFLLR.G                   |
|               | HsFLAG-UTX1_Ti_2i  | 3.0584 | 0.3282 | 1199.35 | 1199.395 | 4678.9 | 1                                                                      | 820    | 93.8 | 2  | K.YPENFFLLR.G                     |
|               | HsFlag-NUFIP_Ti_1C | 5.4504 | 0.4606 | 2114.06 | 2115.32  | 6688.8 | 1                                                                      | 1505.3 | 70.6 | 19 | K.TFTDCFNCLPIAAIVDEK.I            |
|               | HsFlag-NUFIP_Ti_1C | 5.5834 | 0.4263 | 2249.12 | 2249.479 | 7631.2 | 1                                                                      | 1500.9 | 61.1 | 13 | K.IFCHGGLSPDLQSMQIR.R             |
|               | HsFlag-NUFIP_Ti_1C | 4.7195 | 0.3543 | 2249.42 | 2249.479 | 8083.2 | 1                                                                      | 1565.6 | 43.1 | 6  | K.IFCHGGLSPDLQSMQIR.R             |
|               | HsFlag-NUFIP_Ti_1C | 3.2996 | 0.1719 | 2686.23 | 2686.018 | 8541.8 | 2                                                                      | 442.3  | 36.4 | 1  | R.IMRPTDVPDQGLLCDLLWSDPK.D        |
|               | HsFLAG-p53-DNA-D   | 4.5257 | 0.4111 | 1641.05 | 1640.792 | 7920.9 | 1                                                                      | 2058   | 80.8 | 15 | R.AHQVVEDGYEFFAK.R                |
| gi 34452705 r | 50                 | 326    | 48.80% | 951     | 102839   | 4.7    | bromodomain containing 8 isoform 1 [Homo sapiens]                      |        |      |    |                                   |
|               | HsMRGBP-FLAG_Ti_   | 2.0226 | 0.2157 | 1456.74 | 1457.67  | 4867.7 | 1                                                                      | 261.2  | 50   | 2  | K.LLSTGPTEPWSIR.E                 |
|               | HsTIP60_Ti_105.439 | 3.8274 | 0.3482 | 1457.17 | 1457.67  | 6458.9 | 1                                                                      | 1009.9 | 75   | 42 | K.LLSTGPTEPWSIR.E                 |
|               | HsMRGBP-FLAG_Ti_   | 2.9386 | 0.1988 | 1715.66 | 1714.959 | 4586.4 | 1                                                                      | 534.2  | 57.1 | 2  | K.LLSTGPTEPWSIREK.L               |
|               | HsH2AZ-FLAG_293_   | 3.756  | 0.2525 | 1235.22 | 1235.299 | 6670.3 | 1                                                                      | 1344.5 | 85   | 5  | R.SGDQNWVSVSR.A                   |
|               | HsFLAG-TIP49b_Ti_  | 3.4912 | 0.3232 | 2071.37 | 2072.374 | 7251   | 1                                                                      | 594.6  | 47.1 | 3  | R.AIKPFAEPGRPPDWFSQK.H            |
|               | HsFLAG-TIP49a_Ti_  | 4.0402 | 0.3557 | 1758.92 | 1759.962 | 5287.4 | 1                                                                      | 865.2  | 67.9 | 7  | K.PFAEPGRPPDWFSQK.H               |
|               | HsMRGBP-FLAG_Ti_   | 6.1679 | 0.4254 | 1995.94 | 1995.116 | 8602.2 | 1                                                                      | 2262   | 75   | 24 | K.HCASQYSELLETETPK.R              |
|               | HsMRGBP-FLAG_Ti_   | 4.492  | 0.5213 | 2149.93 | 2151.304 | 9414.1 | 1                                                                      | 1543.9 | 61.8 | 4  | K.HCASQYSELLETETPK.R              |
|               | HsTIP60_Ti_106.261 | 2.7748 | 0.2621 | 1443.62 | 1444.625 | 6228.3 | 1                                                                      | 445.7  | 54.2 | 6  | K.GEVVETVEDVIVR.K                 |
|               | HsTIP60_Ti_105.260 | 5.0826 | 0.4028 | 1445.43 | 1444.625 | 7442.6 | 1                                                                      | 1965.9 | 83.3 | 36 | K.GEVVETVEDVIVR.K                 |
|               | HsMRGBP-FLAG_Ti_   | 4.6171 | 0.3099 | 1572.95 | 1572.799 | 7041.6 | 1                                                                      | 2393   | 84.6 | 5  | K.GEVVETVEDVIVR.K                 |
|               | HsTIP60_Ti_106.200 | 3.6807 | 0.1134 | 1317.48 | 1316.541 | 8314.9 | 1                                                                      | 1186   | 80   | 1  | R.KLTAERVEELK.K                   |
|               | HsTIP60_Ti_103.147 | 2.989  | 0.1546 | 1188.23 | 1188.367 | 4520.4 | 4                                                                      | 864    | 88.9 | 1  | K.LTAERVEELK.K                    |
|               | HsMRGBP-FLAG_Ti_   | 4.539  | 0.3681 | 1599.81 | 1599.762 | 3593.4 | 1                                                                      | 801.4  | 80.8 | 6  | K.RDAELIQAGHMDSR.L                |

|                     |        |        |         |          |        |                                                                     |        |      |    |                                            |
|---------------------|--------|--------|---------|----------|--------|---------------------------------------------------------------------|--------|------|----|--------------------------------------------|
| HsMRGBP-FLAG_Ti     | 2.4023 | 0.2981 | 1442.65 | 1443.574 | 4320.4 | 7                                                                   | 345.8  | 54.2 | 1  | R.DAELIQAGHMDSR.L                          |
| HsMRGBP-FLAG_Ti     | 4.1991 | 0.2181 | 1444.14 | 1443.574 | 6400.3 | 1                                                                   | 1426.6 | 79.2 | 12 | R.DAELIQAGHMDSR.L                          |
| HsYL1_Ti_101.1824.  | 3.1613 | 0.3282 | 1291.45 | 1292.395 | 5376.6 | 1                                                                   | 562.8  | 70   | 6  | R.LDELCNDIATK.K                            |
| HsTIP60_Ti_102.163  | 4.4047 | 0.3234 | 1293.26 | 1292.395 | 5324.5 | 1                                                                   | 1195.7 | 90   | 7  | R.LDELCNDIATK.K                            |
| HsTIP60_Ti_103.150  | 3.2386 | 0.1314 | 1421.66 | 1420.569 | 7637   | 7                                                                   | 669.4  | 63.6 | 2  | R.LDELCNDIATKK.K                           |
| HsMRGBP-FLAG_Ti     | 3.5468 | 0.2542 | 1332.47 | 1332.494 | 5455.5 | 1                                                                   | 1348.4 | 90   | 2  | K.KKLEEEAEVK.R                             |
| HsTIP60_Ti_106.090  | 2.7091 | 0.273  | 1251.44 | 1251.388 | 8121.4 | 7                                                                   | 519.1  | 55   | 1  | K.RKATDAAYQAR.Q                            |
| HsFLAG-TIP49b_Ti_   | 2.9182 | 0.1791 | 972.24  | 972.237  | 7353.6 | 1                                                                   | 1163.6 | 92.9 | 6  | R.RLPTVMVR.S                               |
| HsTIP60_Ti_106.285  | 1.871  | 0.1735 | 1463.58 | 1463.758 | 3296.7 | 7                                                                   | 226.9  | 50   | 1  | K.ATPPPSPLSELLK.K                          |
| HsTIP60_Ti_106.211  | 2.5765 | 0.0985 | 1055.61 | 1056.25  | 4980.7 | 2                                                                   | 383.6  | 66.7 | 1  | K.KGSLPTSPR.L                              |
| HsTIP60_Ti_106.211  | 3.4319 | 0.1454 | 1056.07 | 1056.25  | 4338.3 | 3                                                                   | 829.1  | 83.3 | 4  | K.KGSLPTSPR.L                              |
| HsMRGBP-FLAG_Ti     | 4.8381 | 0.4094 | 2704.04 | 2704.092 | 4390.5 | 1                                                                   | 790.2  | 50   | 7  | R.LLEAGPTQFTTPLASFTTVASEPPVK.L             |
| HsTIP60_Ti_106.295  | 4.4432 | 0.3658 | 2704.83 | 2704.092 | 7174.9 | 1                                                                   | 883.1  | 31   | 1  | R.LLEAGPTQFTTPLASFTTVASEPPVK.L             |
| HsH2AZ-FLAG_293_    | 1.8819 | 0.2781 | 1001.3  | 1002.112 | 4307.7 | 1                                                                   | 307.7  | 55   | 1  | R.SGVAEAPVGSK.A                            |
| HsMRGBP-FLAG_Ti     | 5.1237 | 0.2917 | 1615.77 | 1615.778 | 7779.6 | 1                                                                   | 1677.5 | 75   | 10 | K.APSIDGKEELDIAEK.M                        |
| HsMRGBP-FLAG_Ti     | 5.8536 | 0.3949 | 4642.58 | 4641.928 | 5301.3 | 1                                                                   | 974.5  | 26.9 | 3  | ER.D                                       |
| HsMRGBP-FLAG_Ti     | 2.8359 | 0.2805 | 1521.66 | 1522.843 | 4392.1 | 1                                                                   | 480.7  | 57.7 | 4  | R.DKPVPLPAPEMTVK.Q                         |
| HsFLAG-TIP49b_Ti_   | 3.2891 | 0.1402 | 1522.26 | 1522.843 | 3898.8 | 1                                                                   | 524.6  | 65.4 | 14 | R.DKPVPLPAPEMTVK.Q                         |
| HsTIP60_Ti_104.151  | 3.7905 | 0.2657 | 1538.55 | 1538.611 | 6980.4 | 1                                                                   | 688.6  | 68.2 | 5  | K.QERLDFEETENK.G                           |
| HsTIP60_Ti_102.153  | 3.1339 | 0.1272 | 1124.35 | 1125.177 | 5245   | 7                                                                   | 831.6  | 87.5 | 4  | R.LDFEETENK.G                              |
| HsYL1_Ti_101.1662.  | 2.0585 | 0.0952 | 1124.52 | 1125.177 | 4394.4 | 9                                                                   | 399    | 68.8 | 1  | R.LDFEETENK.G                              |
| HsMRGBP-FLAG_Ti     | 2.7704 | 0.2218 | 1051.63 | 1052.219 | 6208.9 | 8                                                                   | 527    | 62.5 | 2  | K.GIHELVDIR.E                              |
| HsMRGBP-FLAG_Ti     | 2.9567 | 0.1587 | 1052.57 | 1052.219 | 3939   | 3                                                                   | 841    | 87.5 | 3  | K.GIHELVDIR.E                              |
| HsMRGBP-FLAG_Ti     | 4.869  | 0.3196 | 1806.89 | 1807.057 | 6883.9 | 1                                                                   | 1382   | 66.7 | 5  | K.GIHELVDIREPSAEIK.V                       |
| HsMRGBP-FLAG_Ti     | 4.5076 | 0.2349 | 3927.7  | 3927.456 | 5677.3 | 1                                                                   | 385.9  | 19.6 | 4  | R.EPSAEIKVEPAEPEPVISGAEIVAGVVPATSMPEPELR.S |
| HsMRGBP-FLAG_Ti     | 2.9361 | 0.3705 | 3171.22 | 3172.618 | 6022.3 | 1                                                                   | 619    | 36.7 | 1  | K.VEPAEPEPVISGAEIVAGVVPATSMPEPELR.S        |
| HsTIP60_Ti_105.311  | 6.035  | 0.4134 | 2516.9  | 2518.691 | 8543.1 | 1                                                                   | 1632.8 | 52.1 | 8  | R.SQDLDEELGSTAAGEIVEADVAIGK.G              |
| HsMRGBP-FLAG_Ti     | 6.1888 | 0.2731 | 3574.38 | 3573.844 | 5268.8 | 1                                                                   | 1397.2 | 33.1 | 21 | R.SQDLDEELGSTAAGEIVEADVAIGKGDETPLTNVK.T    |
| HsMRGBP-FLAG_Ti     | 5.1769 | 0.4353 | 2234.28 | 2234.483 | 7486.9 | 1                                                                   | 1412.2 | 60.5 | 5  | K.FEMSDSLKEESGTIFGSQIK.D                   |
| HsMRGBP-FLAG_Ti     | 2.345  | 0.1391 | 1295.65 | 1296.42  | 3191.8 | 6                                                                   | 185    | 54.5 | 1  | K.EESGTIFGSQIK.D                           |
| HsTIP60_Ti_102.185  | 3.4538 | 0.4027 | 1296.16 | 1296.42  | 4631.6 | 1                                                                   | 646.3  | 72.7 | 4  | K.EESGTIFGSQIK.D                           |
| HsFLAG-TIP49b_Ti_   | 4.8152 | 0.1605 | 3492.22 | 3490.999 | 4563   | 1                                                                   | 498.5  | 26.7 | 3  | R.YANVFLQPVTDDIAPGYHSIVQRPMDLSTIK.K        |
| HsYL1_Ti_106.2480.  | 3.7038 | 0.1736 | 3620.32 | 3619.173 | 4232.3 | 1                                                                   | 286.6  | 23.4 | 1  | R.YANVFLQPVTDDIAPGYHSIVQRPMDLSTIKK.N       |
| HsMRGBP-FLAG_Ti     | 6.1234 | 0.3873 | 2880.09 | 2880.283 | 9862.8 | 1                                                                   | 1257.2 | 44   | 4  | R.DVLEIQQFLATQLIMQTSSEGISAK.S              |
| HsMRGBP-FLAG_Ti     | 5.0433 | 0.3437 | 2882.69 | 2880.283 | 6152.4 | 1                                                                   | 852.6  | 32   | 2  | R.DVLEIQQFLATQLIMQTSSEGISAK.S              |
| HsTIP60_Ti_106.397  | 4.7682 | 0.5182 | 2066.67 | 2068.352 | 4692.1 | 1                                                                   | 610.5  | 57.9 | 25 | K.DSVPMSGSPAFLLSLFDGGTR.G                  |
| *<br>gil 4503471 re | 24     | 319    | 48.70%  | 462      | 50141  | 9 eukaryotic translation elongation factor 1 alpha 1 [Homo sapiens] |        |      |    |                                            |
| HsFLAG-ARP6_Ti_1    | 4.6953 | 0.3853 | 1589.5  | 1589.835 | 9070.4 | 1                                                                   | 1844.8 | 71.4 | 16 | K.THINIVVIGHVDSGK.S                        |
| HsSrcap_Ti_206.252  | 2.9506 | 0.4242 | 1589.65 | 1589.835 | 7888.4 | 1                                                                   | 828.8  | 60.7 | 1  | K.THINIVVIGHVDSGK.S                        |
| HsTIP60_Ti_105.137  | 1.9632 | 0.1372 | 1120.39 | 1121.279 | 6519.3 | 3                                                                   | 584.4  | 66.7 | 1  | K.STTTGHLIYK.C                             |
| HsFLAG-p53-DNA-D    | 3.1463 | 0.3628 | 1121.3  | 1121.279 | 8751.6 | 1                                                                   | 1234   | 77.8 | 21 | K.STTTGHLIYK.C                             |
| HsFLAG-ARP5_Ti_1    | 2.541  | 0.1763 | 1611.43 | 1611.851 | 9393   | 1                                                                   | 594.7  | 53.8 | 1  | R.TIEKFEKEAAEMGK.G                         |
| HsFLAG-FLJ20729_    | 3.9563 | 0.2962 | 1405.38 | 1405.596 | 3703.6 | 1                                                                   | 888.6  | 54.5 | 2  | K.YYVTIIDAPGHR.D                           |

|                |                    |        |        |         |          |         |   |        |      |    |                                                  |
|----------------|--------------------|--------|--------|---------|----------|---------|---|--------|------|----|--------------------------------------------------|
|                | HsFLAG-Lin9_Ti_20  | 2.135  | 0.1226 | 1405.66 | 1405.596 | 5203.2  | 2 | 284.2  | 54.5 | 1  | K.YYVTIIDAPGHR.D                                 |
|                | HsFlag-VPS71_Ti_10 | 3.6822 | 0.3307 | 1406.68 | 1405.596 | 5821.5  | 1 | 1234.3 | 81.8 | 68 | K.YYVTIIDAPGHR.D                                 |
|                | HsSrcap_Ti_204.512 | 3.2119 | 0.2572 | 2910.96 | 2911.263 | 8701.9  | 2 | 388.9  | 28.6 | 2  | K.NMITGTSQADCAVLIVAAGVGEFEAGISK.N                |
|                | HsFlag-VPS71_Ti_10 | 4.5563 | 0.1844 | 2913.87 | 2911.263 | 6269.6  | 1 | 1050.3 | 33   | 12 | K.NMITGTSQADCAVLIVAAGVGEFEAGISK.N                |
|                | HsFlag-VPS71_Ti_10 | 3.8784 | 0.3946 | 1314.66 | 1315.555 | 4878    | 1 | 770    | 72.7 | 24 | R.EHALLAYTLGVK.Q                                 |
|                | HsFLAG-p53-DNA-D   | 3.6805 | 0.3101 | 1315.6  | 1315.555 | 7027.5  | 1 | 1495   | 86.4 | 27 | R.EHALLAYTLGVK.Q                                 |
| *              | HsFLAG-p53-DNA-D   | 5.3726 | 0.3935 | 3697.05 | 3698.205 | 7214.2  | 1 | 1106.8 | 28.9 | 16 | K.KIGYNPDTVAFVPISWGNGDNMLEPSANMPWFK.G            |
|                | HsFLAG-TCF3_Ti_10  | 6.2873 | 0.4401 | 2784.44 | 2785.09  | 7148.2  | 1 | 1431.7 | 38   | 4  | R.KDGNASGTTLEALDCILPPTRPTDK.P                    |
| *              | HsFLAG-p53-DNA-D   | 4.8334 | 0.3656 | 3151.75 | 3151.554 | 7453.4  | 1 | 948.2  | 29.5 | 1  | R.KDGNASGTTLEALDCILPPTRPTDKPLR.L                 |
|                | HsFLAG-FLJ20309_   | 4.4387 | 0.3105 | 2655.12 | 2656.916 | 7839.9  | 1 | 578.3  | 37.5 | 33 | K.DGNASGTTLEALDCILPPTRPTDK.P                     |
|                | HsFLAG-FLJ20729_   | 5.3432 | 0.2989 | 2656.04 | 2656.916 | 4798.2  | 1 | 626.4  | 32.3 | 25 | K.DGNASGTTLEALDCILPPTRPTDK.P                     |
| *              | HsFLAG-TCF3_Ti_10  | 4.3666 | 0.2614 | 3978.45 | 3980.517 | 10389.3 | 1 | 616.9  | 20   | 1  | K.DGNASGTTLEALDCILPPTRPTDKPLRLPLQDVYK.I          |
|                | HsFlag-DPCD_Ti_20  | 1.8412 | 0.2195 | 1025.34 | 1026.224 | 4853.1  | 6 | 236.2  | 60   | 1  | K.IGGIGTVPVGR.V                                  |
|                | HsFLAG-ARP6_Ti_10  | 3.7953 | 0.3438 | 1026.89 | 1026.224 | 5194.3  | 2 | 970.8  | 85   | 12 | K.IGGIGTVPVGR.V                                  |
|                | HsFLAG-p53-DNA-D   | 5.3017 | 0.4413 | 2516.01 | 2516.999 | 4507.5  | 1 | 741    | 52.2 | 42 | R.VETGVLKPGMVVTFAPVNVTTTEVK.S                    |
|                | HsFlag-NUFIP_Ti_20 | 4.1135 | 0.2792 | 2517.87 | 2516.999 | 4807.9  | 1 | 681.4  | 33.7 | 2  | R.VETGVLKPGMVVTFAPVNVTTTEVK.S                    |
|                | HsFlag-VPS71_Ti_10 | 4.1033 | 0.2634 | 1791.5  | 1790.128 | 5866.5  | 1 | 689.1  | 53.1 | 2  | K.PGMVVTFAPVNVTTTEVK.S                           |
| *              | HsFLAG-FLJ20729_   | 4.8388 | 0.4594 | 2997.39 | 2997.374 | 7268.9  | 1 | 1376.2 | 33.3 | 4  | K.SGDAIVDMVPGKPMCVESFSDDYPLGR.F                  |
| gij 18375623 r |                    | 26     | 126    | 48.60%  | 428      | 48991   |   |        |      |    | 5.7 HLA-B associated transcript 1 [Homo sapiens] |
| gij 4758112 re |                    | 26     | 126    | 48.60%  | 428      | 48991   |   |        |      |    | 5.7 HLA-B associated transcript 1 [Homo sapiens] |
|                | HsFLAG-Lin9_Ti_20  | 3.0073 | 0.2799 | 1296.63 | 1297.413 | 4711.8  | 2 | 221.9  | 54.5 | 3  | K.GSYVSIHSSGFR.D                                 |
|                | HsFLAG-FLJ20729_   | 3.6241 | 0.3653 | 1296.99 | 1297.413 | 6359.8  | 1 | 982    | 72.7 | 7  | K.GSYVSIHSSGFR.D                                 |
|                | HsFLAG-Lin9_Ti_20  | 2.6521 | 0.1748 | 1243.61 | 1244.52  | 3979.5  | 1 | 468.9  | 77.8 | 1  | R.DFLLKPELLR.A                                   |
|                | HsFlag-NUFIP_Ti_10 | 3.2269 | 0.1338 | 1244.76 | 1244.52  | 4710.6  | 2 | 906.8  | 83.3 | 2  | R.DFLLKPELLR.A                                   |
|                | HsFLAG-FLJ20729_   | 6.4447 | 0.4235 | 3653    | 3654.027 | 6880.9  | 1 | 1503.5 | 33.1 | 11 | R.AIVDCGFEHPSEVQHECIPQAILGMDVLCQAK.S             |
|                | HsFLAG-Lin9_Ti_20  | 2.3675 | 0.1628 | 1137.9  | 1138.395 | 8766.4  | 8 | 689.9  | 65   | 1  | K.VAVFFGGLSIK.K                                  |
|                | HsFLAG-Lin9_Ti_20  | 3.4367 | 0.3219 | 1139.07 | 1138.395 | 6751.1  | 1 | 1213.8 | 80   | 3  | K.VAVFFGGLSIK.K                                  |
|                | HsFLAG-p53-DNA-D   | 3.9484 | 0.3314 | 1435.47 | 1435.635 | 8193.9  | 1 | 1242.8 | 75   | 6  | K.KNCPHIVVGTGPR.I                                |
|                | HsFLAG-Lin9_Ti_20  | 2.4181 | 0.2932 | 1306.53 | 1307.461 | 4507.3  | 4 | 188.8  | 54.5 | 1  | K.NCPHIVVGTGPR.I                                 |
|                | HsH2AZ-FLAG_293_   | 4.035  | 0.3869 | 1308.34 | 1307.461 | 6873.4  | 1 | 1320.4 | 81.8 | 9  | K.NCPHIVVGTGPR.I                                 |
|                | HsFLAG-Lin9_Ti_20  | 3.1797 | 0.1953 | 1176.4  | 1177.265 | 5215.2  | 1 | 688.8  | 75   | 3  | K.HFILDEC DK.M                                   |
|                | HsFLAG-Lin9_Ti_20  | 3.0843 | 0.1069 | 1177.17 | 1177.265 | 4666.4  | 5 | 864.8  | 81.2 | 2  | K.HFILDEC DK.M                                   |
|                | HsFlag-VPS71_Ti_10 | 4.2756 | 0.4438 | 1846.56 | 1846.077 | 5547.9  | 1 | 2021.5 | 89.3 | 9  | K.FMQDPMEIFVDDETK.L                              |
|                | HsFLAG-Lin9_Ti_20  | 3.2061 | 0.3726 | 1462.54 | 1463.72  | 5019    | 2 | 426    | 59.1 | 2  | K.LTLHGLQQYYVK.L                                 |
|                | HsFLAG-Lin9_Ti_20  | 3.5535 | 0.2277 | 1462.54 | 1463.72  | 6395.9  | 1 | 1144.6 | 54.5 | 1  | K.LTLHGLQQYYVK.L                                 |
|                | HsFLAG-p53-DNA-D   | 3.4387 | 0.3284 | 1464.78 | 1463.72  | 6416.1  | 1 | 1051.3 | 77.3 | 8  | K.LTLHGLQQYYVK.L                                 |
|                | HsFlag-NUFIP_Ti_11 | 5.8021 | 0.4298 | 2277.86 | 2278.669 | 8055.1  | 1 | 2325.2 | 68.4 | 6  | R.CIALAQLLVEQNFP AIAIHR.G                        |
|                | HsFlag-DPCD_Ti_20  | 5.8238 | 0.335  | 2278.16 | 2278.669 | 4665.2  | 1 | 1120.4 | 47.4 | 14 | R.CIALAQLLVEQNFP AIAIHR.G                        |
|                | HsFLAG-FLJ20729_   | 3.868  | 0.3173 | 1260.58 | 1260.525 | 6371.3  | 1 | 891.1  | 75   | 4  | R.RILVATNLFGR.G                                  |
|                | HsFLAG-Lin9_Ti_20  | 2.2326 | 0.1198 | 1104.68 | 1104.338 | 5498.1  | 2 | 339.8  | 66.7 | 2  | R.ILVATNLFGR.G                                   |
|                | HsFLAG-Lin9_Ti_20  | 3.4027 | 0.2346 | 1105.14 | 1104.338 | 6349.5  | 1 | 1134.3 | 83.3 | 7  | R.ILVATNLFGR.G                                   |
|                | HsFLAG-FLJ20729_   | 4.54   | 0.3819 | 2299.96 | 2301.492 | 4743.3  | 1 | 619.6  | 52.8 | 3  | R.VNIAFN YDMPEDSDTYLHR.V                         |
|                | HsFLAG-Lin9_Ti_20  | 4.8327 | 0.4231 | 1480.33 | 1480.615 | 7594.8  | 1 | 2068.7 | 84.6 | 6  | K.GLAITFVSDENDAK.I                               |

|               |                    |        |        |         |          |        |                                         |        |      |                                              |
|---------------|--------------------|--------|--------|---------|----------|--------|-----------------------------------------|--------|------|----------------------------------------------|
|               | HsFLAG-Lin9_Ti_20% | 3.7762 | 0.3725 | 1480.73 | 1480.615 | 8409.7 | 1                                       | 923.6  | 61.5 | 4 K.GLAITFVSDENDAK.I                         |
|               | HsFLAG-Lin9_Ti_20% | 5.8394 | 0.3282 | 3553.48 | 3552.874 | 8811   | 1                                       | 862.4  | 27.6 | 7 K.ILNDVQDRFEVNISELPEIDISSYIEQTR.-          |
|               | HsFLAG-Lin9_Ti_20% | 4.2176 | 0.323  | 2597.11 | 2598.823 | 5530.4 | 1                                       | 914.8  | 54.8 | 4 R.FEVNISELPDEIDISSYIEQTR.-                 |
| gi 4506701 re | 6                  | 16     | 48.30% | 143     | 15808    | 10.5   | ribosomal protein S23 [Homo sapiens]    |        |      |                                              |
| *             | HsFLAG-TIP49b_Ti_  | 1.944  | 0.1428 | 810.47  | 810.972  | 4667.6 | 7                                       | 421.3  | 71.4 | 3 K.AHLGTALK.A                               |
| *             | HsFlag-FLJ20643_Ti | 2.5799 | 0.1346 | 1056.79 | 1057.154 | 5253.5 | 1                                       | 620.8  | 70   | 3 K.ANPFGGASHAK.G                            |
| *             | HsFlag-NUFIP_Ti_1C | 2.5984 | 0.2152 | 1057.14 | 1057.154 | 4227.4 | 1                                       | 571.7  | 75   | 1 K.ANPFGGASHAK.G                            |
|               | HsFLAG-ARP6_Ti_1   | 4.7312 | 0.2999 | 3125.64 | 3126.459 | 8243.1 | 1                                       | 1108.3 | 30.6 | 4 K.KITAFVPNDGCLNFIEENDEVLVAGFGR.K           |
|               | HsFLAG-TCF3_Ti_1C  | 2.8741 | 0.1999 | 1078.39 | 1078.216 | 5284.1 | 5                                       | 572.3  | 70   | 1 K.GHAVGDIPGVR.F                            |
|               | HsFLAG-ARP6_Ti_1   | 4.3825 | 0.3125 | 1191.16 | 1191.456 | 5250.6 | 1                                       | 1304.4 | 90   | 4 K.VANVSLLLALYK.G                           |
| gi 56549696 r | 135                | 853    | 47.70% | 3122    | 339693   | 9.2    | E1A binding protein p400 [Homo sapiens] |        |      |                                              |
| *             | HsMRGBP-FLAG_Ti_   | 4.1266 | 0.3873 | 4178.47 | 4178.564 | 7006.6 | 1                                       | 621.3  | 21.7 | 1 .A                                         |
| *             | HsMRGBP-FLAG_Ti_   | 4.3758 | 0.3392 | 2530.51 | 2530.806 | 8129.1 | 1                                       | 1416.5 | 33.7 | 1 R.AGAPGPGLGLCSSSPTGGFVDASVLVR.Q            |
| *             | HsYL1-FLAG_Ti_20%  | 4.7571 | 0.4611 | 2531.19 | 2530.806 | 3901.1 | 1                                       | 496.3  | 46.2 | 18 R.AGAPGPGLGLCSSSPTGGFVDASVLVR.Q           |
|               | HsYL1-FLAG_Ti_20%  | 4.4456 | 0.4387 | 2578.03 | 2578.946 | 5095.8 | 1                                       | 557.9  | 40.7 | 3 R.TPGVLLPGAGGAAGFGMTSPPPPTSPSR.T           |
|               | HsTIP60_Ti_106.011 | 3.8731 | 0.4046 | 2029.09 | 2028.372 | 3245.1 | 4                                       | 214.6  | 42.5 | 2 R.TAVPPGLSSLPLTSVGNMGK.K                   |
|               | HsMRGBP-FLAG_Ti_   | 4.6866 | 0.4365 | 2030.87 | 2028.372 | 6675.5 | 1                                       | 1003.2 | 37.5 | 1 R.TAVPPGLSSLPLTSVGNMGK.K                   |
|               | HsTIP60_Ti_106.223 | 4.1117 | 0.3041 | 1828.51 | 1828.152 | 2939.6 | 1                                       | 504.9  | 70   | 7 K.KLEEIPPASPEMAQMR.K                       |
|               | HsMRGBP-FLAG_Ti_   | 3.9763 | 0.1089 | 1831.09 | 1828.152 | 7435.3 | 1                                       | 1379.4 | 46.7 | 1 K.KLEEIPPASPEMAQMR.K                       |
| *             | HsFLAG-TIP49b_Ti_  | 2.4326 | 0.2398 | 1231.36 | 1232.428 | 5699.6 | 1                                       | 496    | 72.2 | 2 K.HYAPLQAYLR.Q                             |
| *             | HsMRGBP-FLAG_Ti_   | 2.9787 | 0.168  | 1232.69 | 1232.428 | 3574.8 | 1                                       | 673.2  | 83.3 | 5 K.HYAPLQAYLR.Q                             |
| *             | HsTIP60_Ti_102.177 | 4.8464 | 0.1556 | 2394.53 | 2395.314 | 8601.8 | 1                                       | 1297.5 | 58.3 | 2 R.QNDLDIEEEEEEEEEEEEEK.S                   |
| *             | HsMRGBP-FLAG_Ti_   | 4.0208 | 0.4051 | 2822.14 | 2823.083 | 6148.3 | 1                                       | 861.6  | 38.9 | 1 K.SEVINDEQALAGSLVAGAGSTVETDLFK.R           |
| *             | HsTIP60_Ti_105.131 | 5.0881 | 0.4079 | 1650.61 | 1650.865 | 6675.7 | 1                                       | 1608.6 | 78.6 | 12 K.RQQAMPSTGMAEQSK.R                       |
| *             | HsYL1_Ti_105.3322. | 3.9131 | 0.2771 | 3629.22 | 3628.207 | 5071.6 | 1                                       | 340.3  | 21.3 | 1 R.LPPAGVPTAALSSALQFAQQPQVVEAQTQLQIPVK.T    |
| *             | HsTIP60_Ti_106.253 | 5.2651 | 0.436  | 2030.52 | 2031.335 | 5756   | 1                                       | 1234.7 | 66.7 | 6 K.VVQVQASQLSSLPQMVASTR.L                   |
| *             | HsYL1-FLAG_Ti_20%  | 4.6974 | 0.4565 | 2208.42 | 2208.433 | 5637.1 | 1                                       | 1393.5 | 41.3 | 3 R.PLPTSSTSSLAPVSGSGPGSPAR.S                |
| *             | HsMRGBP-FLAG_Ti_   | 5.0974 | 0.4174 | 2208.63 | 2208.433 | 4225.5 | 1                                       | 1031.7 | 58.7 | 13 R.PLPTSSTSSLAPVSGSGPGSPAR.S               |
| *             | HsYL1_Ti_104.0922. | 3.315  | 0.3305 | 1345    | 1345.455 | 6226   | 2                                       | 555.2  | 62.5 | 1 R.SSPVNRPPSATNK.A                          |
| *             | HsYL1_Ti_105.1736. | 4.9515 | 0.419  | 4548.94 | 4549.866 | 6897   | 1                                       | 630.5  | 19   | 6 VHQR.I                                     |
| *             | HsH2AZ-FLAG_293_   | 2.6386 | 0.1126 | 818.23  | 817.923  | 3662.3 | 5                                       | 594.1  | 91.7 | 1 K.AGLWSQR.R                                |
| *             | HsMRGBP-FLAG_Ti_   | 5.2444 | 0.3329 | 2024.64 | 2024.244 | 5870.4 | 1                                       | 1399.9 | 73.3 | 23 R.EIECFWSNIEQVVEIK.L                      |
| *             | HsYL1-FLAG_Ti_20%  | 5.2804 | 0.4155 | 1758.45 | 1757.869 | 9838.3 | 1                                       | 2449.5 | 75   | 10 K.GFDALQESSLDGSMGR.K                      |
| *             | HsMRGBP-FLAG_Ti_   | 4.6601 | 0.4053 | 4203.88 | 4205.308 | 6890.3 | 1                                       | 827.2  | 23.6 | 2 K.ASISLTDDEVDDEETIEEEEEANEGVVDHQTELSNLAK.E |
| *             | HsTIP60_Ti_105.330 | 2.7437 | 0.148  | 1271.6  | 1272.543 | 2600.5 | 2                                       | 427.2  | 80   | 3 K.EAELPLLDLMK.L                            |
| *             | HsYL1_Ti_102.2911. | 2.714  | 0.2718 | 1271.61 | 1272.543 | 2922.7 | 1                                       | 307.3  | 70   | 1 K.EAELPLLDLMK.L                            |
| *             | HsYL1_Ti_106.2960. | 4.1365 | 0.3673 | 1927.18 | 1926.322 | 6405.7 | 1                                       | 1339.3 | 70   | 1 R.KDLVLIDSLFIMDQFK.A                       |
| *             | HsH2AZ-FLAG_293_   | 2.6696 | 0.132  | 1799.61 | 1798.147 | 9511.3 | 1                                       | 1057.2 | 60.7 | 2 K.DLVLIDSLFIMDQFK.A                        |
| *             | HsTIP60_Ti_106.315 | 5.4718 | 0.4067 | 1526.48 | 1526.77  | 5905.5 | 1                                       | 2136.2 | 89.3 | 26 K.DIADVTAVAEAILPK.G                       |
| *             | HsTIP60_Ti_105.364 | 4.4984 | 0.2096 | 1526.85 | 1526.77  | 8259.3 | 2                                       | 2230.9 | 57.1 | 1 K.DIADVTAVAEAILPK.G                        |
| *             | HsYL1_Ti_103.2372. | 2.9831 | 0.2252 | 1321.56 | 1322.55  | 3351.5 | 1                                       | 220.3  | 59.1 | 2 K.FNAPSLLYGALR.D                           |
| *             | HsH2AZ-FLAG_293_   | 4.023  | 0.3164 | 1321.79 | 1322.55  | 4913.2 | 1                                       | 1113.7 | 86.4 | 18 K.FNAPSLLYGALR.D                          |
| *             | HsMRGBP-FLAG_Ti_   | 2.7648 | 0.1191 | 916.34  | 916.108  | 2713.9 | 4                                       | 686.9  | 92.9 | 2 K.IGLDWLAK.L                               |

|   |                    |        |        |         |          |        |   |        |      |    |                                     |
|---|--------------------|--------|--------|---------|----------|--------|---|--------|------|----|-------------------------------------|
| * | HsTIP60_Ti_105.222 | 4.6973 | 0.3369 | 1385.05 | 1385.56  | 5270.6 | 1 | 1349   | 84.6 | 4  | K.NLNGILADEAGLGK.T                  |
| * | HsTIP60_Ti_105.222 | 3.0731 | 0.336  | 1385.49 | 1385.56  | 4995.7 | 2 | 303.3  | 53.8 | 1  | K.NLNGILADEAGLGK.T                  |
| * | HsH2AZ-FLAG_293_   | 3.3698 | 0.218  | 1047.43 | 1046.214 | 4481.4 | 1 | 1010.3 | 93.8 | 6  | K.ILSYIGSHR.E                       |
| * | HsFLAG-TIP49b_Ti_  | 4.6425 | 0.5091 | 1631.69 | 1630.803 | 7003.3 | 1 | 1601.7 | 79.2 | 2  | R.HWEAVFTLQSQQR.L                   |
| * | HsTIP60_Ti_106.191 | 1.9514 | 0.089  | 916.46  | 917.096  | 4656.5 | 2 | 471.3  | 75   | 1  | K.KYEHVLK.C                         |
| * | HsFLAG-TIP49b_Ti_  | 3.0354 | 0.0841 | 916.9   | 917.096  | 5091.8 | 2 | 855.3  | 100  | 3  | K.KYEHVLK.C                         |
| * | HsYL1_Ti_102.2078. | 4.0027 | 0.1935 | 1889.03 | 1889.156 | 4169.4 | 1 | 934.5  | 68.8 | 17 | K.ALYEDVILQPGTQEALK.S               |
| * | HsFLAG-TIP49b_Ti_  | 2.4201 | 0.1066 | 1291.56 | 1292.447 | 4464.4 | 3 | 433.4  | 65   | 4  | R.ICNHPGLVEPR.H                     |
| * | HsMRGBP-FLAG_Ti_   | 3.4377 | 0.2836 | 1294.23 | 1292.447 | 5142.9 | 1 | 1039.3 | 80   | 10 | R.ICNHPGLVEPR.H                     |
| * | HsFLAG-TIP49b_Ti_  | 5.149  | 0.4411 | 2187.38 | 2187.5   | 8614.1 | 1 | 1164.8 | 52.5 | 22 | R.HPGSSYVAGPLEYPSASLILK.A           |
| * | HsYL1-FLAG_Ti_206  | 4.1734 | 0.4019 | 1696.51 | 1695.925 | 6199.7 | 1 | 1377.7 | 71.4 | 7  | K.EADLSMFDLIGLENK.I                 |
| * | HsMRGBP-FLAG_Ti_   | 3.123  | 0.2071 | 1297.71 | 1297.497 | 5716.4 | 1 | 999.9  | 80   | 2  | K.ITRHEAELLSK.K                     |
| * | HsH2AZ-FLAG_293_   | 2.0304 | 0.1025 | 926.31  | 927.045  | 4135.9 | 1 | 530.6  | 78.6 | 2  | R.HEAELLSK.K                        |
| * | HsH2AZ-FLAG_293_   | 2.8583 | 0.1635 | 929.38  | 927.045  | 5566.5 | 1 | 932.9  | 92.9 | 2  | R.HEAELLSK.K                        |
| * | HsMRGBP-FLAG_Ti_   | 4.6458 | 0.1972 | 1575.81 | 1575.821 | 6787.2 | 1 | 2104.2 | 78.6 | 4  | R.KLMEEISTSAAAPAAR.P                |
| * | HsFLAG-TIP49b_Ti_  | 5.5117 | 0.4504 | 2013.64 | 2014.348 | 8300.8 | 1 | 1894.1 | 65.8 | 5  | R.KLMEEISTSAAAPAARPAAAK.L           |
| * | HsFLAG-TIP49b_Ti_  | 5.0002 | 0.3616 | 2013.85 | 2014.348 | 7105.7 | 1 | 1263   | 40.8 | 4  | R.KLMEEISTSAAAPAARPAAAK.L           |
| * | HsYL1-FLAG_Ti_202  | 2.7011 | 0.2179 | 1447.82 | 1447.646 | 8254.2 | 1 | 1336.4 | 69.2 | 1  | K.LMEEISTSAAAPAAR.P                 |
| * | HsMRGBP-FLAG_Ti_   | 3.7661 | 0.2625 | 1886.95 | 1886.174 | 4030.7 | 2 | 752.3  | 40.3 | 2  | K.LMEEISTSAAAPAARPAAAK.L            |
| * | HsMRGBP-FLAG_Ti_   | 4.0028 | 0.4133 | 1886.95 | 1886.174 | 5681.6 | 1 | 712.9  | 50   | 13 | K.LMEEISTSAAAPAARPAAAK.L            |
| * | HsFLAG-TIP49b_Ti_  | 4.1768 | 0.3793 | 1646.76 | 1647.874 | 7076.7 | 1 | 1263   | 73.1 | 11 | R.LFQPVQYQKPEGR.T                   |
| * | HsYL1-FLAG_Ti_206  | 2.2208 | 0.2389 | 1209.64 | 1210.378 | 3556.7 | 3 | 217.8  | 65   | 3  | R.TVAFPSTHPPR.T                     |
| * | HsFLAG-TIP49b_Ti_  | 3.0316 | 0.2347 | 1210.15 | 1210.378 | 4715.3 | 1 | 959.7  | 80   | 11 | R.TVAFPSTHPPR.T                     |
| * | HsFLAG-TIP49b_Ti_  | 2.9212 | 0.2483 | 1509.46 | 1510.69  | 3375.4 | 1 | 176.1  | 50   | 9  | R.TAAPTASAAPQGGLR.G                 |
| * | HsTIP60_Ti_104.145 | 3.9967 | 0.3473 | 1510.44 | 1510.69  | 5695.9 | 1 | 1128   | 73.3 | 12 | R.TAAPTASAAPQGGLR.G                 |
| * | HsH2AZ-FLAG_293_   | 3.9714 | 0.3148 | 1556.04 | 1556.762 | 6556.5 | 2 | 1546.6 | 51.8 | 1  | R.GRPPIATFSANPEAK.A                 |
| * | HsH2AZ-FLAG_293_   | 4.2397 | 0.2281 | 1556.57 | 1556.762 | 5462.1 | 1 | 857.1  | 64.3 | 16 | R.GRPPIATFSANPEAK.A                 |
| * | HsYL1-FLAG_Ti_202  | 4.8415 | 0.2856 | 1633.73 | 1632.773 | 6087.4 | 1 | 1521.2 | 75   | 8  | K.AAAAPFQTSQASASAPR.H               |
| * | HsH2AZ-FLAG_293_   | 5.0985 | 0.4854 | 1715.96 | 1716.851 | 3728.5 | 1 | 1074.8 | 76.5 | 11 | R.HQPASASSTAASPAHPAK.L              |
| * | HsTIP60_Ti_106.163 | 4.3225 | 0.4303 | 1716.37 | 1716.851 | 7341.1 | 1 | 1451.1 | 47.1 | 4  | R.HQPASASSTAASPAHPAK.L              |
| * | HsFLAG-TIP49b_Ti_  | 3.5113 | 0.3675 | 3177.19 | 3178.448 | 7944.9 | 1 | 297.1  | 27.4 | 3  | R.AQTQAQSTPGQPPPQPQAPSHAAGQSALPQR.L |
| * | HsFLAG-TIP49b_Ti_  | 5.8956 | 0.3791 | 3179.03 | 3178.448 | 4483.6 | 1 | 966.7  | 33.1 | 11 | R.AQTQAQSTPGQPPPQPQAPSHAAGQSALPQR.L |
| * | HsH2AZ-FLAG_293_   | 3.1913 | 0.3097 | 1341.31 | 1342.538 | 3794.6 | 1 | 280.5  | 66.7 | 10 | K.IAQLASITGPQSR.V                   |
| * | HsTIP60_Ti_104.171 | 3.9199 | 0.3468 | 1342.36 | 1342.538 | 6760.7 | 1 | 1353.3 | 79.2 | 10 | K.IAQLASITGPQSR.V                   |
| * | HsH2AZ-FLAG_293_   | 3.8541 | 0.3418 | 1730.54 | 1730.959 | 4876.9 | 1 | 834.8  | 70   | 11 | R.VAQPETPVTLQFQGSK.F                |
| * | HsFLAG-TIP49b_Ti_  | 2.8212 | 0.2945 | 1088.81 | 1089.239 | 6829.7 | 1 | 935    | 87.5 | 6  | K.FTLSHSCLR.Q                       |
| * | HsYL1_Ti_104.2979. | 3.1994 | 0.4667 | 2863.13 | 2864.318 | 6061   | 1 | 521.1  | 38.5 | 1  | R.QLTAGQLQLQGSVLQIVSAPGQPYLR.A      |
| * | HsTIP60_Ti_103.167 | 2.6886 | 0.4292 | 1483.58 | 1484.693 | 7505.1 | 1 | 822.2  | 56.7 | 1  | R.VAVNALAVGEPGTASK.P                |
| * | HsMRGBP-FLAG_Ti_   | 4.3495 | 0.3811 | 1485.69 | 1484.693 | 6464.5 | 1 | 1029.3 | 66.7 | 5  | R.VAVNALAVGEPGTASK.P                |
| * | HsH2AZ-FLAG_293_   | 4.5387 | 0.3222 | 2775.35 | 2777.104 | 6056.2 | 1 | 1003.3 | 31.2 | 9  | R.VAVNALAVGEPGTASKPASPIGGPTQEEK.T   |
| * | HsYL1_Ti_103.1626. | 4.5684 | 0.4105 | 2777.38 | 2777.104 | 4095.8 | 1 | 334    | 37.5 | 13 | R.VAVNALAVGEPGTASKPASPIGGPTQEEK.T   |
| * | HsYL1_Ti_103.1704. | 4.2557 | 0.2815 | 1550.79 | 1548.739 | 5959.6 | 1 | 1314.8 | 81.8 | 14 | K.ERLDQIYLVNER.R                    |
| * | HsTIP60_Ti_103.188 | 3.8703 | 0.3191 | 1262.56 | 1263.436 | 4825.8 | 2 | 729.9  | 77.8 | 1  | R.LDQIYLVNER.R                      |

|   |                    |        |        |         |          |         |   |        |      |                                               |
|---|--------------------|--------|--------|---------|----------|---------|---|--------|------|-----------------------------------------------|
| * | HsH2AZ-FLAG_293_   | 2.8976 | 0.291  | 1196.12 | 1194.302 | 5851.8  | 1 | 510.6  | 66.7 | 1 R.RCSQAPVYGR.D                              |
| * | HsFLAG-TIP49b_Ti_  | 2.7941 | 0.1279 | 1011.31 | 1011.135 | 3379.1  | 2 | 939.4  | 93.8 | 2 R.ICALPSHGR.V                               |
| * | HsFLAG-TIP49b_Ti_  | 5.1146 | 0.4571 | 2611.75 | 2611.806 | 9701.9  | 1 | 922.7  | 43.5 | 8 K.EAGPAHSYTSSESSESPSELMLTLCR.C              |
| * | HsMRGBP-FLAG_Ti_   | 4.3942 | 0.2526 | 2613.25 | 2611.806 | 9055.3  | 1 | 1568.1 | 34.8 | 2 K.EAGPAHSYTSSESSESPSELMLTLCR.C              |
| * | HsMRGBP-FLAG_Ti_   | 4.3446 | 0.3707 | 1292.74 | 1292.354 | 7760.1  | 1 | 1667.4 | 90   | 4 R.CGESLQDVIDR.V                             |
| * | HsFLAG-TIP49b_Ti_  | 4.6896 | 0.2978 | 1633.88 | 1634.018 | 5489.9  | 7 | 1199.3 | 48.3 | 5 R.VAFVIPPVVAAPPSLR.V                        |
| * | HsYL1_Ti_106.2534. | 4.0717 | 0.2894 | 1635.2  | 1634.018 | 3301.1  | 2 | 479.2  | 63.3 | 7 R.VAFVIPPVVAAPPSLR.V                        |
| * | HsTIP60_Ti_106.222 | 2.1745 | 0.2131 | 1359.59 | 1360.515 | 3489.3  | 1 | 244.6  | 60   | 2 R.EHAAPYFQQLR.Q                             |
| * | HsTIP60_Ti_106.222 | 3.0585 | 0.2852 | 1360.67 | 1360.515 | 4369.9  | 1 | 763.1  | 80   | 6 R.EHAAPYFQQLR.Q                             |
| * | HsMRGBP-FLAG_Ti_   | 3.0033 | 0.1217 | 1017.54 | 1016.228 | 4380.6  | 4 | 830.6  | 92.9 | 5 R.LLQFPPELR.L                               |
| * | HsH2AZ-FLAG_293_   | 4.2831 | 0.1568 | 1987.32 | 1987.39  | 5790.4  | 1 | 972.9  | 39.7 | 2 R.LVQFDSGKLEALAILLQK.L                      |
| * | HsFLAG-TIP49b_Ti_  | 4.5468 | 0.3058 | 1987.84 | 1987.39  | 11719.8 | 1 | 1809.1 | 61.8 | 8 R.LVQFDSGKLEALAILLQK.L                      |
| * | HsH2AZ-FLAG_293_   | 3.6665 | 0.3035 | 1305.49 | 1305.486 | 6428.9  | 1 | 1418   | 85   | 11 R.IFCAILSTHSR.T                            |
| * | HsMRGBP-FLAG_Ti_   | 4.4277 | 0.5186 | 2855.09 | 2856.174 | 5228.5  | 1 | 739.8  | 44   | 5 R.TTGINLVEADTVVFDNDLNPVMDAK.A               |
| * | HsMRGBP-FLAG_Ti_   | 3.6402 | 0.3716 | 2856.55 | 2856.174 | 10214.3 | 1 | 690.1  | 26   | 1 R.TTGINLVEADTVVFDNDLNPVMDAK.A               |
| * | HsMRGBP-FLAG_Ti_   | 5.0944 | 0.4626 | 1902.67 | 1902.089 | 7287.2  | 1 | 1185.5 | 62.5 | 11 R.EVAAQGN DY SMAFLTQR.T                    |
| * | HsMRGBP-FLAG_Ti_   | 4.4697 | 0.3571 | 1903.5  | 1902.089 | 7317    | 1 | 1258.1 | 42.2 | 1 R.EVAAQGN DY SMAFLTQR.T                     |
| * | HsMRGBP-FLAG_Ti_   | 4.7111 | 0.43   | 2288.34 | 2287.589 | 5291.2  | 1 | 973.8  | 57.9 | 6 R.TIQELFEVYSPMDDAGFPVK.A                    |
| * | HsMRGBP-FLAG_Ti_   | 4.8148 | 0.3049 | 4444.81 | 4444.007 | 6684.2  | 1 | 880.6  | 23.7 | 2 R.TIQELFEVYSPMDDAGFPVKAEEFVLSQEPSVTETIAPK.I |
| * | HsMRGBP-FLAG_Ti_   | 5.878  | 0.2954 | 2176.42 | 2175.441 | 6278.2  | 1 | 1259.7 | 60.5 | 16 K.AEEFVLSQEPSVTETIAPK.I                    |
| * | HsMRGBP-FLAG_Ti_   | 4.3534 | 0.2291 | 2176.55 | 2175.441 | 7000.4  | 1 | 1285.7 | 42.1 | 1 K.AEEFVLSQEPSVTETIAPK.I                     |
| * | HsTIP60_Ti_102.169 | 4.3428 | 0.2697 | 1324.28 | 1325.415 | 6946    | 1 | 1478.4 | 85   | 5 K.SIEYLEEDAQK.S                             |
| * | HsYL1_Ti_101.1862. | 3.4053 | 0.168  | 1325.59 | 1325.415 | 8514.5  | 4 | 968.1  | 70   | 2 K.SIEYLEEDAQK.S                             |
| * | HsH2AZ-FLAG_293_   | 5.7121 | 0.426  | 2098.29 | 2099.348 | 7769.6  | 1 | 1743.1 | 71.9 | 24 K.YALNYLELFHTSIEQEK.E                      |
| * | HsH2AZ-FLAG_293_   | 4.0072 | 0.2487 | 2098.75 | 2099.348 | 4568.7  | 1 | 702.8  | 39.1 | 5 K.YALNYLELFHTSIEQEK.E                       |
| * | HsFLAG-TIP49b_Ti_  | 4.664  | 0.3493 | 1478.45 | 1478.62  | 4930.2  | 1 | 1210.1 | 83.3 | 6 K.ERNSEDAVMTAVR.A                           |
| * | HsMRGBP-FLAG_Ti_   | 2.6599 | 0.1372 | 1094.5  | 1094.258 | 3246.3  | 2 | 777.8  | 85.7 | 1 R.AWEFWNLK.T                                |
| * | HsMRGBP-FLAG_Ti_   | 6.4578 | 0.3924 | 1867.05 | 1865.094 | 7749.1  | 1 | 2455.7 | 82.1 | 10 R.LRLEQEEAELLTYTR.E                        |
| * | HsMRGBP-FLAG_Ti_   | 3.615  | 0.3785 | 1595.59 | 1595.747 | 6223.5  | 1 | 1283.7 | 75   | 1 R.LEQEEAELLTYTR.E                           |
| * | HsTIP60_Ti_106.188 | 2.5902 | 0.2318 | 1246.51 | 1246.415 | 4818.2  | 1 | 518.3  | 70   | 2 K.QRHGEAVVPPR.S                             |
| * | HsFLAG-TIP49b_Ti_  | 3.38   | 0.284  | 963.49  | 962.096  | 4983.4  | 1 | 692    | 81.2 | 11 R.HGEAVVPPR.S                              |
| * | HsMRGBP-FLAG_Ti_   | 3.6541 | 0.3638 | 963.51  | 962.096  | 7059.7  | 1 | 1909.2 | 100  | 21 R.HGEAVVPPR.S                              |
| * | HsMRGBP-FLAG_Ti_   | 5.5942 | 0.3562 | 3565.14 | 3564.032 | 9132.2  | 1 | 1088.4 | 25.8 | 3 K.PLPTFAKPTAEPGQDNPEWLISEDWALLQAVK.Q        |
| * | HsMRGBP-FLAG_Ti_   | 4.6207 | 0.5104 | 2808.14 | 2809.105 | 6897.6  | 1 | 861.6  | 41.7 | 6 K.PTAEPGQDNPEWLISEDWALLQAVK.Q               |
| * | HsMRGBP-FLAG_Ti_   | 3.6529 | 0.2815 | 2809.12 | 2809.105 | 7238.8  | 1 | 1147.7 | 35.4 | 1 K.PTAEPGQDNPEWLISEDWALLQAVK.Q               |
| * | HsFLAG-TIP49a_Ti_  | 4.8568 | 0.3242 | 3592.93 | 3590.037 | 5309.7  | 1 | 677    | 28.2 | 7 K.QLLELPLNLTIVSPAHTPNWDLVSDVVNSCSR.I        |
| * | HsMRGBP-FLAG_Ti_   | 2.0768 | 0.0867 | 1273.75 | 1274.465 | 3262.3  | 9 | 184.8  | 61.1 | 1 R.NRYENVIIIPR.E                             |
| * | HsYL1_Ti_104.1528. | 3.6521 | 0.152  | 1274.35 | 1274.465 | 5065.2  | 1 | 987.1  | 83.3 | 15 R.NRYENVIIIPR.E                            |
| * | HsFLAG-TIP49b_Ti_  | 3.2941 | 0.4119 | 2942.64 | 2944.202 | 11583.4 | 1 | 822.6  | 35.4 | 3 R.TSQIYAQDENATHQLYTSHF DLMK.M               |
| * | HsMRGBP-FLAG_Ti_   | 4.3    | 0.2649 | 2944.41 | 2944.202 | 5759.4  | 1 | 674.4  | 30.2 | 3 R.TSQIYAQDENATHQLYTSHF DLMK.M               |
| * | HsFLAG-TIP49b_Ti_  | 5.5029 | 0.4392 | 2675.24 | 2677.076 | 7208.7  | 1 | 1100.6 | 47.9 | 6 K.HASVLAESGINYDKPLPIQVASLR.A                |
| * | HsTIP60_Ti_106.236 | 5.4258 | 0.5654 | 1728.55 | 1727.999 | 5387.3  | 1 | 1528.2 | 75   | 14 K.AQPAITGGSSAAVLAGTIK.T                    |
| * | HsTIP60_Ti_105.364 | 4.1352 | 0.1418 | 3393.91 | 3392.849 | 4616.4  | 5 | 301.3  | 20.6 | 1 K.TSVTGTSMPTGAVSGNVIVNTIAGVPAATFQSINK.R     |

|                |                    |        |        |         |          |        |   |        |      |    |                                                                     |
|----------------|--------------------|--------|--------|---------|----------|--------|---|--------|------|----|---------------------------------------------------------------------|
| *              | HsTIP60_Ti_105.225 | 4.4418 | 0.4949 | 2130.35 | 2131.409 | 5168.9 | 1 | 725.5  | 52.4 | 11 | R.AVGSPATATPDLVSMATTQGVR.A                                          |
| *              | HsMRGBP-FLAG_Ti_   | 4.7083 | 0.377  | 1711.43 | 1709.984 | 5106.8 | 1 | 1128.5 | 68.8 | 15 | R.SLVPQVSQATGVQLPGK.T                                               |
| *              | HsFLAG-TIP49b_Ti_  | 2.642  | 0.1611 | 1296.48 | 1297.543 | 4453.1 | 2 | 254.2  | 60   | 1  | K.TITPAHFQLLR.Q                                                     |
| *              | HsFLAG-TIP49b_Ti_  | 3.0554 | 0.197  | 1297.32 | 1297.543 | 5691.2 | 1 | 584.9  | 70   | 3  | K.TITPAHFQLLR.Q                                                     |
| *              | HsMRGBP-FLAG_Ti_   | 3.514  | 0.4064 | 1683.57 | 1682.961 | 6894.2 | 1 | 752.9  | 53.1 | 3  | R.PGALLTGTTVANLQVAR.L                                               |
| *              | HsFLAG-TIP49a_Ti_  | 4.3718 | 0.3266 | 1920.52 | 1920.28  | 4757   | 1 | 770.2  | 58.8 | 14 | K.AAGQTVVAQPVHMQQLL.K                                               |
| *              | HsTIP60_Ti_104.135 | 4.3044 | 0.3016 | 1606.27 | 1606.822 | 6872.3 | 1 | 1376.1 | 48.3 | 2  | K.AIQPQAAQGPAAVQQK.I                                                |
| *              | HsTIP60_Ti_104.135 | 4.5205 | 0.4676 | 1606.44 | 1606.822 | 6042.1 | 1 | 1084.4 | 66.7 | 10 | K.AIQPQAAQGPAAVQQK.I                                                |
| *              | HsTIP60_Ti_103.142 | 2.0138 | 0.2567 | 1484.55 | 1485.681 | 5438.9 | 5 | 286.8  | 46.2 | 2  | K.ITAQQITTPGAQQK.V                                                  |
| *              | HsYL1_Ti_102.1422. | 4.4747 | 0.1296 | 1487.1  | 1485.681 | 5872.4 | 3 | 798.7  | 65.4 | 5  | K.ITAQQITTPGAQQK.V                                                  |
| *              | HsYL1_Ti_102.1386. | 2.6223 | 0.2436 | 1031.65 | 1032.228 | 5128.7 | 4 | 629.3  | 66.7 | 4  | K.VAYAAQPALK.T                                                      |
| *              | HsTIP60_Ti_103.140 | 3.4472 | 0.322  | 1031.78 | 1032.228 | 6233.2 | 1 | 1609.7 | 88.9 | 4  | K.VAYAAQPALK.T                                                      |
| *              | HsTIP60_Ti_103.386 | 4.1067 | 0.3163 | 1462.54 | 1463.674 | 6408.6 | 1 | 1510.3 | 83.3 | 23 | K.TQFLTTPISQAQK.L                                                   |
| *              | HsMRGBP-FLAG_Ti_   | 2.6063 | 0.2805 | 1463.66 | 1463.674 | 6485.4 | 3 | 358.6  | 50   | 4  | K.TQFLTTPISQAQK.L                                                   |
| *              | HsYL1-FLAG_Ti_202  | 4.0467 | 0.3487 | 1582.81 | 1583.828 | 7310.2 | 1 | 746.8  | 57.1 | 6  | K.LAGAQQVQTQIQVAK.L                                                 |
| *              | HsMRGBP-FLAG_Ti_   | 5.2339 | 0.1908 | 1584.24 | 1583.828 | 8102.8 | 1 | 1296.6 | 67.9 | 11 | K.LAGAQQVQTQIQVAK.L                                                 |
| *              | HsYL1-FLAG_Ti_204  | 4.5191 | 0.3383 | 3742.12 | 3741.15  | 5959.5 | 1 | 589.9  | 22.2 | 10 | K.LIQQVVTTASAPLQTPGAPNPAQVPASSDSPSQPK.L                             |
| gij 14165464 r | 22                 | 259    | 47.60% | 550     | 59037    |        |   |        |      |    | 9.2 polypyrimidine tract-binding protein 1 isoform b [Homo sapiens] |
| gij 4506243 re | 22                 | 259    | 47.00% | 557     | 59633    |        |   |        |      |    | 9.2 polypyrimidine tract-binding protein 1 isoform a [Homo sapiens] |
| gij 14165466 r | 22                 | 259    | 49.30% | 531     | 57221    |        |   |        |      |    | 9.2 polypyrimidine tract-binding protein 1 isoform c [Homo sapiens] |
|                | HsFLAG-p53-DNA-D   | 6.0625 | 0.5056 | 2112    | 2113.502 | 8692.8 | 1 | 2927.3 | 73.7 | 33 | R.KLPIDVTEGEVISLGLPFGK.V                                            |
|                | HsFLAG-FLJ20729_   | 3.8365 | 0.2806 | 2112.99 | 2113.502 | 6658.7 | 1 | 922.4  | 35.5 | 3  | R.KLPIDVTEGEVISLGLPFGK.V                                            |
|                | HsFLAG-FLJ20309_   | 5.8117 | 0.513  | 1984.9  | 1985.328 | 9573.4 | 1 | 2685.9 | 69.4 | 22 | K.LPIDVTEGEVISLGLPFGK.V                                             |
|                | HsFLAG-p53-DNA-D   | 3.1954 | 0.267  | 1432.45 | 1432.622 | 4557.9 | 1 | 728.2  | 72.7 | 17 | R.GQPIYIQFSNHK.E                                                    |
|                | HsFlag-VPS71_Ti_1( | 5.7021 | 0.4921 | 3684.59 | 3683.193 | 8671.6 | 1 | 937.6  | 23   | 6  | R.I                                                                 |
|                | HsFLAG-p53-DNA-D   | 4.5342 | 0.3786 | 2488.4  | 2489.96  | 4882.1 | 1 | 774.5  | 37.5 | 13 | R.IIVENLFYPVTLVDLHQIFSK.F                                           |
|                | HsFLAG-p53-DNA-D   | 4.434  | 0.3972 | 2489.01 | 2489.96  | 4687.7 | 1 | 493.7  | 47.5 | 13 | R.IIVENLFYPVTLVDLHQIFSK.F                                           |
|                | HsFLAG-p53-DNA-D   | 5.2614 | 0.4844 | 2243.61 | 2244.472 | 7116.9 | 1 | 1126.6 | 57.9 | 18 | K.NNQFQALLQYADPVSAQHAK.L                                            |
|                | HsFLAG-UTX1_Ti_2(  | 5.8021 | 0.3697 | 2245.95 | 2244.472 | 6195.1 | 1 | 1313.6 | 43.4 | 17 | K.NNQFQALLQYADPVSAQHAK.L                                            |
|                | HsFLAG-FLJ20729_   | 4.497  | 0.3186 | 1898.54 | 1899.043 | 5559   | 1 | 801.2  | 63.3 | 8  | K.LSLDGQNIYNACCTLR.I                                                |
|                | HsARP6-FLAG_Ti_1(  | 5.8915 | 0.4869 | 2275.53 | 2276.641 | 6017.9 | 1 | 1836.7 | 70.5 | 35 | R.IAIPGLAGAGNSVLLVSNLNP.V                                           |
|                | HsFLAG-p53-DNA-D   | 5.3335 | 0.4058 | 2277.01 | 2276.641 | 6915.2 | 1 | 1280.8 | 39.8 | 10 | R.IAIPGLAGAGNSVLLVSNLNP.V                                           |
|                | HsARP6-FLAG_Ti_1(  | 5.3045 | 0.3742 | 2039.5  | 2040.37  | 7983.6 | 1 | 1966.9 | 48.5 | 7  | R.VTPQSLFILFGVYGDVQR.V                                              |
|                | HsFLAG-Lin9_Ti_20( | 5.7329 | 0.5427 | 2039.95 | 2040.37  | 8433.1 | 1 | 2625   | 76.5 | 36 | R.VTPQSLFILFGVYGDVQR.V                                              |
|                | HsFLAG-p53-DNA-D   | 2.1483 | 0.1959 | 820.58  | 821.013  | 4338.6 | 1 | 357.7  | 83.3 | 4  | K.LHGKPIR.I                                                         |
|                | HsFLAG-Lin9_Ti_20( | 1.9757 | 0.1111 | 991.49  | 992.126  | 6845.7 | 6 | 502.8  | 71.4 | 1  | K.HQNVQLPR.E                                                        |
|                | HsFlag-DPCD_Ti_20  | 3.1713 | 0.18   | 992.06  | 992.126  | 5582.1 | 1 | 1000.7 | 92.9 | 3  | K.HQNVQLPR.E                                                        |
|                | HsFLAG-p53-DNA-D   | 2.1395 | 0.2256 | 1058.45 | 1059.126 | 2975.3 | 3 | 297.3  | 75   | 1  | K.DYGN SPLHR.F                                                      |
|                | HsFLAG-p53-DNA-D   | 4.5902 | 0.3295 | 2995.05 | 2996.346 | 5340.4 | 1 | 720.1  | 44.2 | 3  | K.NFQNIFFPSATLHLSNIPPSVSEEDLK.V                                     |
|                | HsFLAG-p53-DNA-D   | 4.6889 | 0.3206 | 2996.75 | 2996.346 | 4887.7 | 1 | 813.7  | 34.6 | 4  | K.NFQNIFFPSATLHLSNIPPSVSEEDLK.V                                     |
|                | HsFlag-VPS71_Ti_1( | 1.9205 | 0.1218 | 1106.58 | 1107.295 | 5729.9 | 8 | 295.4  | 55   | 1  | K.VLFSSNGGVVK.G                                                     |
|                | HsFLAG-p53-DNA-D   | 5.8092 | 0.2644 | 3492.22 | 3492.953 | 6143.8 | 1 | 1021.8 | 31.7 | 4  | K.MALIQMGVVEEAVQALIDLHNHDLGENHHLR.V                                 |
| gij 4758560 re | 11                 | 37     | 47.60% | 357     | 39299    |        |   |        |      |    | 8.1 WD repeat domain 57 (U5 snRNP specific) [Homo sapiens]          |

|               |                    |        |        |         |          |                                                          |   |        |      |                                          |
|---------------|--------------------|--------|--------|---------|----------|----------------------------------------------------------|---|--------|------|------------------------------------------|
| *             | HsFLAG-p53-DNA-D   | 3.2244 | 0.2236 | 1333.74 | 1333.66  | 4445.5                                                   | 1 | 599.8  | 72.7 | 4 R.KGPELPLVPVKR.Q                       |
| *             | HsFlag-ZnF-HIT2_Ti | 6.0179 | 0.3756 | 2850.7  | 2851.195 | 7902.3                                                   | 1 | 2901.9 | 41.4 | 5 R.HELLLGAGSGPGAGQQQATPGALLQAGPPR.C     |
| *             | HsFlag-ZnF-HIT2_Ti | 3.8929 | 0.3285 | 1576.91 | 1577.696 | 3277.9                                                   | 1 | 560.7  | 67.9 | 2 K.FHPNGSTLASAGFDR.L                    |
| *             | HsFlag-ZnF-HIT2_Ti | 2.7819 | 0.2782 | 2172.86 | 2172.452 | 7204.3                                                   | 1 | 560.9  | 47.1 | 1 R.LILLWNVYGDNDNYATLK.G                 |
| *             | HsFlag-ZnF-HIT2_Ti | 3.8451 | 0.3096 | 1495.78 | 1496.588 | 7009.6                                                   | 1 | 1463.7 | 79.2 | 2 K.GHTSFVNSCYPAR.K                      |
| *             | HsFlag-ZnF-HIT2_Ti | 6.8371 | 0.4744 | 3702.01 | 3703.054 | 7897.6                                                   | 1 | 1447.9 | 30.3 | 6 K.AAIQTFQNTYQVLAVTFNDTSDQIISGGIDNDIK.V |
| *             | HsScrap_Ti_105.212 | 2.8894 | 0.1746 | 1215.68 | 1215.44  | 4251.5                                                   | 7 | 707.9  | 83.3 | 2 R.VWDVRPFAPK.E                         |
| *             | HsFlag-ZnF-HIT2_Ti | 2.9397 | 0.247  | 1332.46 | 1333.489 | 5121.6                                                   | 1 | 412.8  | 60   | 1 K.IFQGNVHNFEK.N                        |
| *             | HsFlag-ZnF-HIT2_Ti | 4.1945 | 0.3563 | 1333.45 | 1333.489 | 6782.1                                                   | 1 | 1570.4 | 90   | 7 K.IFQGNVHNFEK.N                        |
| *             | HsFlag-ZnF-HIT2_Ti | 5.99   | 0.4579 | 2802.99 | 2803.101 | 6847                                                     | 1 | 1130.2 | 32.7 | 5 K.LPGHAGSINEVAFHPDEPIIISASSDK.R        |
| *             | HsScrap_Ti_205.249 | 4.1242 | 0.3423 | 2803.16 | 2803.101 | 6470.6                                                   | 1 | 563.4  | 36.5 | 2 K.LPGHAGSINEVAFHPDEPIIISASSDK.R        |
| gij4503745 re | 81                 | 357    | 47.40% | 2647    | 280759   | 6.1 filamin 1 (actin-binding protein-280) [Homo sapiens] |   |        |      |                                          |
| *             | HsFLAG-ARP6_Ti_2   | 3.5989 | 0.3342 | 1443.36 | 1443.516 | 6015.6                                                   | 1 | 1002.6 | 65.6 | 3 R.AGQSAAGAAPGGGVDR.D                   |
| *             | HsFLAG-Lin9_Ti_20  | 3.1046 | 0.2153 | 1572.55 | 1572.762 | 5977                                                     | 1 | 938.9  | 69.2 | 2 K.RIANLQTDLSDGLR.L                     |
| *             | HsFLAG-p53-DNA-D   | 3.9845 | 0.2649 | 1416.59 | 1416.574 | 7686.4                                                   | 1 | 1347.7 | 79.2 | 3 R.IANLQTDLSDGLR.L                      |
| *             | HsFLAG-p53-DNA-D   | 4.3406 | 0.3465 | 1227.4  | 1227.53  | 5275.5                                                   | 1 | 1365.1 | 90   | 13 R.LIALLEVLSQK.K                       |
| *             | HsFLAG-p53-DNA-D   | 3.4629 | 0.0813 | 972.27  | 972.175  | 2910.7                                                   | 4 | 584.7  | 92.9 | 2 R.LLGWIQNK.L                           |
| *             | HsFLAG-UTX1_Ti_2   | 2.7766 | 0.1423 | 1286.54 | 1286.517 | 3193.9                                                   | 1 | 715.4  | 90   | 2 K.LPQLPITNFSR.D                        |
| *             | HsFlag-VPS71_Ti_1  | 4.4143 | 0.464  | 2593.03 | 2592.754 | 4248.2                                                   | 1 | 710.2  | 50   | 1 R.ALGALVDSCAPGLCPDWSDWASK.P            |
| *             | HsFLAG-p53-DNA-D   | 4.3538 | 0.3957 | 3230.61 | 3231.478 | 5752                                                     | 1 | 858.1  | 30.2 | 2 R.ALGALVDSCAPGLCPDWSDWASKPVTNAR.E      |
| *             | HsFLAG-p53-DNA-D   | 5.4656 | 0.3911 | 4571.61 | 4573.102 | 4532                                                     | 1 | 710.4  | 26.3 | 1 .A                                     |
| *             | HsFLAG-p53-DNA-D   | 3.2676 | 0.344  | 2313.4  | 2314.47  | 4620.5                                                   | 1 | 288.3  | 35.7 | 1 R.SAGQGEVLVYVEDPAGHQEEAK.V             |
| *             | HsFLAG-p53-DNA-D   | 3.5937 | 0.3765 | 1750.6  | 1751.979 | 5965.8                                                   | 1 | 554.5  | 57.1 | 7 R.TFSVWYVPEVTGTHK.V                    |
| *             | HsFLAG-p53-DNA-D   | 4.1195 | 0.2523 | 1284.43 | 1284.544 | 6055.7                                                   | 1 | 1409   | 86.4 | 12 K.VTVLFAGQHIAK.S                      |
| *             | HsFLAG-Lin9_Ti_20  | 4.1521 | 0.4129 | 1653.21 | 1653.833 | 5463.3                                                   | 1 | 1157.3 | 71.9 | 7 K.VTAQGPGLPSGNIANK.T                   |
| *             | HsFLAG-Lin9_Ti_20  | 3.5821 | 0.3106 | 2683.2  | 2685.039 | 5188.9                                                   | 1 | 597.2  | 30.4 | 1 R.CSYQPTMEGVHTVHVTFAGVPIPR.S           |
| *             | HsFLAG-p53-DNA-D   | 2.8893 | 0.2077 | 1227.27 | 1227.406 | 7756.9                                                   | 1 | 1068.8 | 75   | 1 R.AWGPGLGGVVGK.S                       |
| *             | HsFLAG-p53-DNA-D   | 4.0814 | 0.3937 | 2536.93 | 2537.714 | 6498.1                                                   | 1 | 745.7  | 50   | 5 R.YWPQEAGEYAVHVLCSNEDIR.L              |
| *             | HsFLAG-p53-DNA-D   | 4.088  | 0.3471 | 1647.48 | 1647.869 | 5146.6                                                   | 1 | 1103.5 | 70   | 2 K.TGVAVNKPAEFTVDAK.H                   |
| *             | HsFLAG-p53-DNA-D   | 4.8023 | 0.3784 | 1786.18 | 1785.958 | 7899.8                                                   | 1 | 1530.4 | 70   | 2 R.VQVQDNEGCPVEALVK.D                   |
| *             | HsFLAG-p53-DNA-D   | 5.4977 | 0.558  | 1943.83 | 1944.218 | 6908.4                                                   | 1 | 1574.9 | 70.6 | 2 K.HTAMVSWGGSIPNSPFR.V                  |
| *             | HsFLAG-ARP5_Ti_1   | 4.0132 | 0.1583 | 1307.26 | 1307.495 | 9962.4                                                   | 1 | 1898.4 | 79.2 | 2 R.VNVGAGSHPNKVK.V                      |
| *             | HsFlag-FLJ20643_Ti | 2.0978 | 0.2021 | 790.61  | 790.938  | 5262.4                                                   | 7 | 388.5  | 64.3 | 2 K.VYGPVAK.T                            |
| *             | HsFLAG-p53-DNA-D   | 4.9325 | 0.329  | 2297.61 | 2297.631 | 8142.9                                                   | 1 | 892.3  | 47.6 | 6 R.GAGSYTIMVLFADQATPTSPIR.V             |
| *             | HsFLAG-UTX1_Ti_2   | 2.8913 | 0.1904 | 1197.31 | 1197.334 | 4546.1                                                   | 1 | 889.1  | 85   | 1 R.VKVEPSHDASK.V                        |
| *             | HsFLAG-UTX1_Ti_2   | 5.002  | 0.3499 | 1699.5  | 1699.947 | 4378.9                                                   | 1 | 759.6  | 66.7 | 10 R.TGVELGKPTHFTVNAK.A                  |
| *             | HsFLAG-Lin9_Ti_20  | 3.5632 | 0.3085 | 1785.38 | 1785.908 | 10500.8                                                  | 1 | 1010.1 | 57.1 | 1 R.DVDIIDHHNDNTYTVK.Y                   |
| *             | HsFLAG-p53-DNA-D   | 4.6663 | 0.4711 | 2286.84 | 2287.577 | 6354.5                                                   | 1 | 959.6  | 57.1 | 9 K.YTPVQQGPVGVNVTYGGDPIPK.S             |
| *             | HsFLAG-p53-DNA-D   | 3.8946 | 0.2934 | 1534.54 | 1534.75  | 6323.8                                                   | 1 | 1073.1 | 67.9 | 4 K.SPFSVAVSPSLDLSK.I                    |
| *             | HsFlag-FLJ90652_2  | 2.8536 | 0.1847 | 1535.54 | 1534.75  | 4550.1                                                   | 3 | 255.2  | 50   | 1 K.SPFSVAVSPSLDLSK.I                    |
| *             | HsFLAG-p53-DNA-D   | 3.5874 | 0.3643 | 1366.16 | 1365.526 | 5557.9                                                   | 1 | 1141.6 | 86.4 | 3 K.VDVGKDQEFTVK.S                       |
| *             | HsFLAG-p53-DNA-D   | 4.0499 | 0.2504 | 2449.62 | 2450.764 | 7169.1                                                   | 1 | 1191.3 | 34.4 | 4 K.IVGPSGAAVPCKEPGLGADNSVVR.F           |
| *             | HsFLAG-p53-DNA-D   | 4.4921 | 0.4121 | 2450.92 | 2450.764 | 4701.1                                                   | 1 | 510.8  | 45.8 | 3 K.IVGPSGAAVPCKEPGLGADNSVVR.F           |



|   |                    |        |        |         |          |        |   |        |      |    |                                                         |
|---|--------------------|--------|--------|---------|----------|--------|---|--------|------|----|---------------------------------------------------------|
| * | HsFlag-VPS71_Ti_1( | 4.8129 | 0.2669 | 4001.74 | 4001.525 | 5755.9 | 1 | 666.5  | 23.6 | 2  | R.FLPREEGPYEVEVITYDGVVPVPGSPFFLEAVAPT <del>KPSK.V</del> |
| * | HsFLAG-Lin9_Ti_20( | 6.2647 | 0.4322 | 3485.54 | 3487.885 | 8633.5 | 1 | 1693.6 | 32   | 17 | R.EEGPYEVEVITYDGVVPVPGSPFFLEAVAPT <del>KPSK.V</del>     |
| * | HsFLAG-FLJ20309_   | 4.0262 | 0.2027 | 1430.59 | 1430.563 | 6545.4 | 1 | 1400.6 | 76.7 | 17 | K.AFGPGLQGG <del>SAGSPAR.F</del>                        |
| * | HsFLAG-UTX1_Ti_2(  | 5.2065 | 0.4856 | 2764.36 | 2765.018 | 9848.8 | 1 | 1297.9 | 46   | 5  | K.LQVEPAVDTS <del>GVQCYPGPIEGQGVFR.E</del>              |
| * | HsFlag-DPCD_Ti_20  | 4.2709 | 0.3239 | 2766.01 | 2765.018 | 8807.4 | 1 | 911.7  | 31   | 1  | K.LQVEPAVDTS <del>GVQCYPGPIEGQGVFR.E</del>              |
| * | HsFLAG-p53-DNA-D   | 3.1623 | 0.3246 | 1109.16 | 1109.271 | 6854.3 | 1 | 673.5  | 65   | 4  | R.ALTQTGGPH <del>VK.A</del>                             |
| * | HsFLAG-p53-DNA-D   | 5.1774 | 0.5057 | 1764.4  | 1764.889 | 6226   | 1 | 1490.6 | 80   | 4  | R.VANPSGNLT <del>TETYVQDR.G</del>                       |
| * | HsFLAG-Lin9_Ti_20( | 3.9304 | 0.3798 | 4297.59 | 4299.57  | 8057.5 | 1 | 519    | 19.7 | 2  | V                                                       |
| * | HsFLAG-Lin9_Ti_20( | 4.7343 | 0.4085 | 1636.35 | 1635.82  | 6416.7 | 1 | 1015.7 | 63.3 | 11 | R.VHGPGIQSG <del>TTNKPNK.F</del>                        |
| * | HsFLAG-p53-DNA-D   | 4.0166 | 0.4269 | 1572.41 | 1571.728 | 8724   | 1 | 1002.1 | 55.9 | 2  | R.GAGTGGLGL <del>AVEGPSEAK.M</del>                      |
| * | HsFLAG-UTX1_Ti_2(  | 3.7275 | 0.2805 | 3581.5  | 3581.84  | 3758.3 | 1 | 423.1  | 25   | 2  | K.DGSCSVEYI <del>PYEAGTYSLNVTYGGHQVPGSPFK.V</del>       |
| * | HsFLAG-p53-DNA-D   | 3.0267 | 0.3095 | 1167.53 | 1168.292 | 7348.6 | 1 | 812.8  | 65   | 1  | K.VPVHDVTD <del>ASK.V</del>                             |
| * | HsFlag-FLJ90652_2( | 2.9708 | 0.3382 | 1168.4  | 1168.292 | 8606   | 1 | 1275.4 | 80   | 5  | K.VPVHDVTD <del>ASK.V</del>                             |
| * | HsFLAG-p53-DNA-D   | 2.5357 | 0.2678 | 1395.4  | 1395.599 | 9030   | 1 | 1208   | 66.7 | 1  | K.VPVHDVTD <del>ASKVK.C</del>                           |
| * | HsFLAG-Lin9_Ti_20( | 3.6481 | 0.3538 | 1435.49 | 1435.577 | 5775.5 | 1 | 711.6  | 66.7 | 3  | R.ANLPQSFQ <del>VDTSK.A</del>                           |
| * | HsFLAG-p53-DNA-D   | 2.1455 | 0.1337 | 882.55  | 883.079  | 4897.2 | 1 | 497.6  | 68.8 | 1  | K.AGVAPLQ <del>VK.V</del>                               |
| * | HsFlag-DPCD_Ti_20  | 6.2329 | 0.4022 | 2544.64 | 2545.765 | 9298.9 | 1 | 2256.9 | 58.7 | 9  | K.GLVEPVDV <del>VDNADGTQTVNYVPSR.E</del>                |
| * | HsFLAG-p53-DNA-D   | 4.4012 | 0.3528 | 1910.18 | 1911.075 | 7810   | 1 | 1097.7 | 62.5 | 3  | R.EGPYSISV <del>LYGDEEVPR.S</del>                       |
| * | HsFLAG-Lin9_Ti_20( | 4.5215 | 0.4423 | 2342.77 | 2343.639 | 4680.3 | 1 | 576.8  | 47.8 | 14 | K.ASGPGLNT <del>TGVPASLPVEFTIDAK.D</del>                |
| * | HsFLAG-p53-DNA-D   | 4.9386 | 0.3447 | 1938.3  | 1939.173 | 6546.9 | 1 | 1548.9 | 63.9 | 7  | K.DAGEGLLAV <del>QITDPEGKPK.K</del>                     |
| * | HsFLAG-p53-DNA-D   | 3.1622 | 0.087  | 1401.5  | 1401.518 | 3801.8 | 7 | 498.2  | 68.2 | 1  | K.YGGDEIPF <del>SPYR.V</del>                            |
| * | HsFLAG-p53-DNA-D   | 4.8022 | 0.2466 | 2947.04 | 2947.28  | 5312.1 | 1 | 803.6  | 32.4 | 4  | R.FGGEHVPN <del>SPFQVTALAGDQPSVQPPLR.S</del>            |
| * | HsFlag-VPS71_Ti_1( | 1.8622 | 0.1976 | 1086.55 | 1087.218 | 5590   | 2 | 430.9  | 66.7 | 1  | K.VAQPTITD <del>DNK.D</del>                             |
| * | HsFlag-VPS71_Ti_1( | 3.2191 | 0.1686 | 1088.32 | 1087.218 | 2987.8 | 1 | 476.3  | 83.3 | 3  | K.VAQPTITD <del>DNK.D</del>                             |
| * | HsFlag-DPCD_Ti_20  | 3.698  | 0.3212 | 1501.31 | 1501.634 | 8172.2 | 1 | 1655.5 | 73.3 | 1  | K.DAGEGGLS <del>LAIEGPSK.A</del>                        |
| * | HsFLAG-UTX1_Ti_2(  | 4.0206 | 0.3504 | 1604.78 | 1603.734 | 3393.3 | 1 | 665.2  | 76.9 | 13 | K.YNEQHVP <del>PGSPFTAR.V</del>                         |
| * | HsFLAG-Lin9_Ti_20( | 2.9505 | 0.3333 | 2894.25 | 2895.28  | 8032.7 | 1 | 458.2  | 30.4 | 1  | K.VGSAADIP <del>INISSETDLSLLTATVPPSGR.E</del>           |
| * | HsFLAG-Lin9_Ti_20( | 4.699  | 0.3213 | 3766.98 | 3765.259 | 4014.5 | 2 | 320.7  | 22.1 | 6  | K.VGSAADIP <del>INISSETDLSLLTATVPPSGREEPCLLK.R</del>    |
| * | HsFLAG-Lin9_Ti_20( | 2.5744 | 0.3508 | 1154.45 | 1155.342 | 3514   | 1 | 481.7  | 75   | 2  | R.NGHVGIS <del>FVPK.E</del>                             |
| * | HsFLAG-Lin9_Ti_20( | 2.3848 | 0.2541 | 1148.34 | 1149.292 | 4288.5 | 6 | 284.3  | 55.6 | 2  | K.ETGEHLV <del>HVK.K</del>                              |
| * | HsFLAG-Lin9_Ti_20( | 4.9679 | 0.3772 | 2448.95 | 2449.683 | 6843.8 | 1 | 1053.7 | 50   | 2  | K.NGQHVASS <del>PIPVVISQSEIGDASR.V</del>                |
| * | HsFlag-NUFIP_Ti_2( | 3.5451 | 0.2248 | 2449.63 | 2449.683 | 9088.4 | 1 | 863.5  | 29.3 | 1  | K.NGQHVASS <del>PIPVVISQSEIGDASR.V</del>                |
| * | HsFLAG-p53-DNA-D   | 4.988  | 0.4442 | 2441.02 | 2441.662 | 7311.8 | 1 | 741.2  | 42.9 | 6  | R.VSQQLHEG <del>HTFEPAEFIIDTR.D</del>                   |
| * | HsFLAG-p53-DNA-D   | 4.9699 | 0.3445 | 2441.46 | 2441.662 | 7824.9 | 1 | 1755.2 | 41.7 | 3  | R.VSQQLHEG <del>HTFEPAEFIIDTR.D</del>                   |
| * | HsFLAG-Lin9_Ti_20( | 3.62   | 0.1945 | 1517.58 | 1516.696 | 4094.9 | 1 | 940.4  | 80.8 | 11 | K.FADQHVP <del>PGSPFSVK.V</del>                         |
| * | HsFLAG-p53-DNA-D   | 4.2831 | 0.3367 | 1656.71 | 1655.814 | 6074.2 | 1 | 785.4  | 60   | 2  | R.APSVANV <del>GSHCDLSLK.I</del>                        |
| * | HsFlag-DPCD_Ti_20  | 5.7658 | 0.462  | 2004.19 | 2003.275 | 8033.8 | 1 | 2055.2 | 69.4 | 5  | K.IPEISIQD <del>MTAQVTS<del>PSGK.T</del></del>          |
| * | HsFLAG-Lin9_Ti_20( | 5.3786 | 0.4359 | 2059.36 | 2059.166 | 7437.7 | 1 | 1824.9 | 71.9 | 1  | K.THEAEIVE <del>GENHTYCIR.F</del>                       |
| * | HsFLAG-UTX1_Ti_2(  | 4.0357 | 0.3473 | 1506.53 | 1503.756 | 3519.6 | 1 | 595.3  | 76.9 | 18 | R.FVPAEMG <del>HTVSVK.Y</del>                           |
| * | HsFLAG-Lin9_Ti_20( | 3.8552 | 0.2523 | 2304.71 | 2305.558 | 4151   | 1 | 606.8  | 35.2 | 1  | K.GQHVP <del>PGSPFQFTVGLGEGGAHK.V</del>                 |
| * | HsARP6-FLAG_Ti_1(  | 3.084  | 0.1445 | 1534.1  | 1534.712 | 3697.9 | 1 | 467.3  | 65.4 | 1  | R.AEAGVPA <del>EFSIWTR.E</del>                          |
| * | HsMRGBP-FLAG_Ti_1( | 4.7088 | 0.4383 | 2258.47 | 2259.397 | 5588.7 | 1 | 722.6  | 50   | 6  | K.DGSCGVAY <del>VVQEPGDYEVSVK.F</del>                   |
| * | HsFLAG-Lin9_Ti_20( | 4.7615 | 0.3307 | 2469.12 | 2468.685 | 5104.5 | 1 | 632.9  | 47.7 | 7  | K.FNEEHIPD <del>SPFVVPV<del>ASPSGDAR.R</del></del>      |

|                |                    |        |        |         |          |         |   |        |      |                                                                                                            |
|----------------|--------------------|--------|--------|---------|----------|---------|---|--------|------|------------------------------------------------------------------------------------------------------------|
| *              | HsFLAG-p53-DNA-D   | 4.1592 | 0.308  | 1418.66 | 1418.633 | 8541.7  | 1 | 2014.3 | 83.3 | 3 R.RLTVSSLQESGLK.V                                                                                        |
| *              | HsFLAG-p53-DNA-D   | 3.8937 | 0.3914 | 1503.28 | 1503.698 | 4371.1  | 1 | 771.3  | 71.4 | 3 K.VNQPASFAVSLNGAK.G                                                                                      |
| *              | HsFLAG-p53-DNA-D   | 4.6871 | 0.4896 | 2277.82 | 2278.4   | 7459.7  | 1 | 1530.5 | 60.5 | 1 K.VHSPSGALEECYVTEIDQDK.Y                                                                                 |
| *              | HsFLAG-p53-DNA-D   | 2.7738 | 0.2914 | 1741.61 | 1742.083 | 5092.7  | 1 | 713.7  | 60   | 2 R.VTYTPMAPGSYLISIK.Y                                                                                     |
| *              | HsFLAG-p53-DNA-D   | 5.2037 | 0.4783 | 2200.21 | 2201.441 | 10857.9 | 1 | 1489.2 | 55.3 | 5 R.LVSNHSLHETSSVFVDSLTK.A                                                                                 |
| *              | HsFLAG-p53-DNA-D   | 4.6486 | 0.4827 | 1790.63 | 1790.896 | 7629.8  | 1 | 1471.5 | 66.7 | 18 K.ATCAPQHAGPAGPADASK.V                                                                                  |
| *              | HsFLAG-p53-DNA-D   | 3.6488 | 0.2843 | 1435.24 | 1435.687 | 7073.7  | 1 | 814.1  | 61.5 | 1 K.AGNMMLLVGVHGPR.T                                                                                       |
| gij 4504041 re |                    | 12     | 37     | 47.30%  | 355      | 40451   |   |        |      | 5.5 guanine nucleotide binding protein (G protein), alpha inhibiting activity polypeptide 2 [Homo sapiens] |
| *              | HsFLAG-ARP6_Ti_1   | 4.7857 | 0.445  | 1737.84 | 1738.095 | 8464.8  | 1 | 1855.2 | 73.3 | 7 R.AVVYSNTIQSIMAIVK.A                                                                                     |
| *              | HsFLAG-ARP6_Ti_1   | 4.5852 | 0.4027 | 2619.58 | 2619.898 | 5891    | 1 | 897.3  | 50   | 2 R.QLFALSCTAEEQGVLPDDLGSVIR.R                                                                             |
| *              | HsFLAG-ARP6_Ti_1   | 4.0565 | 0.4289 | 1517.22 | 1517.653 | 7134.8  | 1 | 1425.4 | 79.2 | 2 R.LWADHGVQACFGR.S                                                                                        |
| *              | HsFLAG-ARP6_Ti_1   | 3.3598 | 0.2993 | 2077.59 | 2078.199 | 7062.7  | 1 | 1203.3 | 56.2 | 1 R.EYQLNDSAAYYLNDLER.I                                                                                    |
| *              | HsFLAG-ARP6_Ti_1   | 3.9927 | 0.2312 | 1748.39 | 1747.946 | 3500.5  | 1 | 622.9  | 71.4 | 1 R.IAQSDYIPTQQDVL.R.T                                                                                     |
| *              | HsFLAG-ARP6_Ti_1   | 3.3505 | 0.2431 | 1381.35 | 1381.571 | 5505.5  | 1 | 661.5  | 68.2 | 5 K.TTGIVETHFTFK.D                                                                                         |
| *              | HsFLAG-ARP6_Ti_1   | 3.8486 | 0.2132 | 1599.42 | 1598.882 | 7907.5  | 1 | 1179.4 | 70.8 | 2 K.WFTDTSIILFLNK.K                                                                                        |
| *              | HsFLAG-ARP6_Ti_1   | 3.3093 | 0.3202 | 1727.16 | 1727.056 | 5833.3  | 1 | 574.2  | 53.8 | 3 K.WFTDTSIILFLNKK.D                                                                                       |
| *              | HsFLAG-ARP6_Ti_1   | 4.5912 | 0.4609 | 2051.04 | 2050.285 | 6052.6  | 1 | 720.7  | 58.8 | 3 K.ITHSPLTICFPEYTGANK.Y                                                                                   |
| *              | HsFLAG-ARP6_Ti_1   | 4.6692 | 0.4351 | 3304.93 | 3306.619 | 4291.7  | 1 | 634.9  | 30.4 | 3 K.ITHSPLTICFPEYTGANKYDEAASYIQSK.F                                                                        |
| *              | HsFLAG-ARP6_Ti_1   | 3.3771 | 0.3264 | 1587.44 | 1587.692 | 7621.9  | 1 | 909.3  | 66.7 | 2 K.EIYTHFTCATDTK.N                                                                                        |
| *              | HsFLAG-ARP6_Ti_1   | 3.2254 | 0.2473 | 1708.53 | 1708.995 | 6149.4  | 1 | 791.4  | 57.1 | 6 K.NVQVFVDAVTDVVIK.N                                                                                      |
| gij 13514822 r |                    | 12     | 115    | 47.20%  | 235      | 24336   |   |        |      | 10.1 DEAH (Asp-Glu-Ala-His) box polypeptide 9 isoform 2 [Homo sapiens]                                     |
| *              | HsFLAG-ARP6_Ti_2   | 3.4378 | 0.3035 | 1317.61 | 1318.514 | 5631.8  | 1 | 986.1  | 80   | 20 K.YPSPFFVFGKE.I                                                                                         |
| *              | HsFlag-NUFIP_Ti_1C | 4.8391 | 0.4198 | 1733.2  | 1733.163 | 3727    | 1 | 774.7  | 70   | 22 K.GMTLVTPQLQLLFFASK.K                                                                                   |
| *              | HsFLAG-p53-DNA-D   | 5.4654 | 0.3775 | 1845.43 | 1844.118 | 7887.5  | 1 | 1665.6 | 70   | 7 K.KVQSDGQIVLVDDWIK.L                                                                                     |
| *              | HsFLAG-FLJ20309_   | 4.8924 | 0.3788 | 1717.24 | 1715.944 | 7152.9  | 1 | 1200.2 | 67.9 | 6 K.VQSDGQIVLVDDWIK.L                                                                                      |
| *              | HsFlag-NUFIP_Ti_1C | 5.258  | 0.4263 | 1640.29 | 1640.846 | 7628.4  | 1 | 1890   | 75   | 12 K.LQISHEAAACITGLR.A                                                                                     |
| *              | HsFLAG-FLJ20309_   | 4.5725 | 0.2924 | 1261.29 | 1261.519 | 6164.2  | 1 | 1670.6 | 81.8 | 14 R.AAMEALVVEVTK.Q                                                                                        |
| *              | HsFLAG-p53-DNA-D   | 3.5996 | 0.3327 | 2823.05 | 2823.277 | 7397.5  | 2 | 495.7  | 26   | 1 R.AAMEALVVEVTKQPAIISQLDPVNER.M                                                                           |
| *              | HsFlag-NUFIP_Ti_1C | 3.4529 | 0.3515 | 1579.91 | 1580.781 | 6517.9  | 1 | 939.5  | 73.1 | 12 K.QPAIISQLDPVNER.M                                                                                      |
| *              | HsFlag-NUFIP_Ti_11 | 4.642  | 0.398  | 1872.96 | 1873.181 | 4456.7  | 1 | 434.1  | 52.9 | 7 R.QISRPSAAGINLMIGSTR.Y                                                                                   |
| *              | HsFlag-NUFIP_Ti_11 | 4.1451 | 0.3157 | 1873.42 | 1873.181 | 8214.4  | 2 | 1007.5 | 38.2 | 1 R.QISRPSAAGINLMIGSTR.Y                                                                                   |
| *              | HsFlag-NUFIP_Ti_1C | 3.0058 | 0.3262 | 1388.64 | 1388.625 | 9432    | 1 | 808.2  | 61.5 | 1 R.PSAAGINLMIGSTR.Y                                                                                       |
| *              | HsFLAG-FLJ20309_   | 3.1395 | 0.1749 | 987.26  | 987.103  | 6653.1  | 4 | 755.5  | 75   | 12 R.YGDGPRPPK.M                                                                                           |
| gij 4503297 re |                    | 55     | 637    | 47.10%  | 1279     | 142069  |   |        |      | 6.6 DEAH (Asp-Glu-Ala-His) box polypeptide 9 isoform 1 [Homo sapiens]                                      |
| *              | HsFLAG-Lin9_Ti_20  | 2.9228 | 0.2069 | 1159.12 | 1159.296 | 5750.8  | 7 | 978.8  | 81.2 | 2 K.NFLYAWCGK.R                                                                                            |
| *              | HsFLAG-FLJ20309_   | 2.8073 | 0.1427 | 1159.52 | 1159.296 | 7258.2  | 2 | 559    | 68.8 | 8 K.NFLYAWCGK.R                                                                                            |
| *              | HsFLAG-FLJ20309_   | 3.4469 | 0.2345 | 1026.29 | 1026.18  | 5994.6  | 2 | 1124   | 92.9 | 7 R.DFVNYLVR.I                                                                                             |
| *              | HsFLAG-ARP6_Ti_1   | 4.8173 | 0.506  | 2162.61 | 2164.252 | 4998    | 1 | 889.2  | 60   | 21 K.AENNSEVGASGYVPGPTWDR.G                                                                                |
| *              | HsFlag-NUFIP_Ti_11 | 6.8985 | 0.4099 | 3483.23 | 3483.727 | 12140.9 | 1 | 2333.3 | 32.5 | 82 R.KEEQEVQATLESEEVDLNLNAGLHGNWTLENAK.A                                                                   |
| *              | HsFLAG-p53-DNA-D   | 3.4209 | 0.3334 | 1187.43 | 1187.257 | 4954.5  | 1 | 778.9  | 83.3 | 11 K.YTQVGPDHNR.S                                                                                          |
| *              | HsFlag-NUFIP_Ti_11 | 3.2333 | 0.2408 | 1318.5  | 1316.598 | 6916    | 1 | 910.8  | 70   | 2 R.SFIAEMTIYIK.Q                                                                                          |
| *              | HsFLAG-ARP6_Ti_1   | 4.4161 | 0.3866 | 1417.12 | 1417.658 | 6823.2  | 1 | 1667.4 | 83.3 | 8 K.KLAAQSCALSIVR.Q                                                                                        |
| *              | HsFlag-NUFIP_Ti_11 | 3.9204 | 0.1646 | 1418.21 | 1417.658 | 9369.5  | 1 | 1714.8 | 54.2 | 2 K.KLAAQSCALSIVR.Q                                                                                        |

|   |                    |        |        |         |          |         |   |        |      |                                              |
|---|--------------------|--------|--------|---------|----------|---------|---|--------|------|----------------------------------------------|
| * | HsFlag-NUFIP_Ti_1C | 4.5423 | 0.3326 | 1289.41 | 1289.484 | 7852.7  | 1 | 1875.9 | 86.4 | 9 K.LAAQSCALSLVR.Q                           |
| * | HsFlag-NUFIP_Ti_1C | 2.9562 | 0.2383 | 1308.17 | 1308.474 | 6966.5  | 1 | 950.5  | 75   | 1 K.KKEGETVEPYK.V                            |
| * | HsFlag-DPCD_Ti_20  | 5.0287 | 0.2813 | 4330.93 | 4329.938 | 4980.1  | 1 | 703.4  | 25   | 9 K.VNLSQDLEHQLQNIQELNLEILPPPEDPSVPVALNIGK.L |
| * | HsFLAG-p53-DNA-D   | 5.3988 | 0.4737 | 2487.53 | 2487.747 | 9719.9  | 1 | 1684.5 | 57.9 | 8 K.NELMYQLEQDHDLDLQAILQER.E                 |
| * | HsFLAG-Lin9_Ti_20  | 4.3725 | 0.3303 | 2488.22 | 2487.747 | 6862.6  | 1 | 1337.8 | 40.8 | 2 K.NELMYQLEQDHDLDLQAILQER.E                 |
| * | HsFlag-NUFIP_Ti_11 | 5.554  | 0.2953 | 2176.06 | 2176.518 | 10987.8 | 1 | 3058.3 | 48.6 | 11 K.KFESEILEAISQNSVVIIR.G                   |
| * | HsFlag-NUFIP_Ti_11 | 6.4105 | 0.4915 | 2176.26 | 2176.518 | 7642.7  | 1 | 2289.1 | 72.2 | 24 K.KFESEILEAISQNSVVIIR.G                   |
| * | HsFLAG-ARP6_Ti_1   | 5.3362 | 0.4051 | 2050.77 | 2051.263 | 4727.2  | 1 | 1254.9 | 75   | 45 K.TTQVPQFILDFFIQNDR.A                     |
| * | HsFLAG-p53-DNA-D   | 3.7786 | 0.1512 | 1359.37 | 1358.503 | 9071.1  | 1 | 1788.3 | 77.3 | 15 R.AAECNIVVTQPR.R                          |
| * | HsFlag-NUFIP_Ti_1C | 3.7771 | 0.1832 | 1088.78 | 1088.252 | 7114.9  | 1 | 1397.9 | 94.4 | 36 R.RISAVSVAER.V                            |
| * | HsFLAG-FLJ20309_   | 2.978  | 0.2283 | 931.64  | 932.065  | 6107.1  | 1 | 1431.6 | 93.8 | 1 R.ISAVSVAER.V                              |
| * | HsFlag-NUFIP_Ti_1C | 3.1527 | 0.1946 | 1219.05 | 1219.34  | 4351.7  | 7 | 801    | 80   | 3 R.VAFERGEEPGK.S                            |
| * | HsFlag-NUFIP_Ti_11 | 5.484  | 0.4806 | 1701.82 | 1702.034 | 8117.5  | 1 | 2329.8 | 85.7 | 12 R.PHASIMFCTVGVLLR.K                       |
| * | HsFLAG-FLJ20729_   | 4.2758 | 0.3335 | 1504.4  | 1504.686 | 5922.5  | 1 | 1176.5 | 75   | 18 R.GISHVIVDEIHER.D                         |
| * | HsFlag-NUFIP_Ti_1C | 4.3683 | 0.2984 | 1504.73 | 1504.686 | 7294.2  | 2 | 1826.4 | 58.3 | 7 R.GISHVIVDEIHER.D                          |
| * | HsFlag-NUFIP_Ti_1C | 3.3671 | 0.2226 | 1176.53 | 1176.315 | 7361.4  | 1 | 1253.7 | 83.3 | 2 R.DVVQAYPEVR.I                             |
| * | HsFlag-NUFIP_Ti_1C | 3.5822 | 0.4601 | 2839.94 | 2841.217 | 8472.9  | 1 | 578    | 36.4 | 4 R.TYPVQEYFLEDICQMTHFVPPPK.D                |
| * | HsFLAG-Lin9_Ti_20  | 4.3627 | 0.4976 | 3045.4  | 3046.928 | 8786.3  | 1 | 952.2  | 40.4 | 3 K.DKDDGGEDDDANCNLICGDEYGPETR.L             |
| * | HsFLAG-Lin9_Ti_20  | 5.5212 | 0.4125 | 3046.4  | 3046.928 | 6006.5  | 1 | 1091.6 | 35.6 | 3 K.DKDDGGEDDDANCNLICGDEYGPETR.L             |
| * | HsFLAG-ARP6_Ti_1   | 3.9253 | 0.4245 | 2802.47 | 2803.666 | 5627.2  | 1 | 714.1  | 45.8 | 1 K.DDDGGEDDDANCNLICGDEYGPETR.L              |
| * | HsFLAG-FLJ20309_   | 2.3179 | 0.1421 | 1049.51 | 1050.215 | 5401.5  | 9 | 392.1  | 68.8 | 1 R.LSMSQLNEK.E                              |
| * | HsFLAG-FLJ20309_   | 3.8167 | 0.3221 | 1403.3  | 1403.659 | 5047.9  | 4 | 763.2  | 77.3 | 35 K.ETPFELIEALLK.Y                          |
| * | HsFLAG-p53-DNA-D   | 4.9162 | 0.1853 | 2980.77 | 2981.566 | 5592.1  | 1 | 743.9  | 44   | 6 K.YIETLNVPGAVLVFLPGWNLIYTMQK.H             |
| * | HsFLAG-FLJ20729_   | 5.6691 | 0.3001 | 2981.66 | 2981.566 | 6820.5  | 1 | 1630.6 | 37   | 2 K.YIETLNVPGAVLVFLPGWNLIYTMQK.H             |
| * | HsFlag-NUFIP_Ti_11 | 4.3609 | 0.342  | 1462.41 | 1462.629 | 7030.6  | 1 | 1604.9 | 86.4 | 7 K.HLEMNPHFGSHR.Y                           |
| * | HsFlag-NUFIP_Ti_1C | 2.4899 | 0.2564 | 1465.1  | 1465.739 | 6319.8  | 1 | 610.9  | 63.6 | 4 R.YQILPLHSQIPR.E                           |
| * | HsFlag-NUFIP_Ti_1C | 3.7965 | 0.1826 | 1465.6  | 1465.739 | 4090.5  | 1 | 799.6  | 77.3 | 29 R.YQILPLHSQIPR.E                          |
| * | HsFlag-NUFIP_Ti_1C | 3.96   | 0.369  | 1286.6  | 1286.557 | 4072.8  | 3 | 751.5  | 77.3 | 9 R.KVFDPPVPGVTK.V                           |
| * | HsFlag-NUFIP_Ti_11 | 2.909  | 0.2054 | 2769.77 | 2769.128 | 7132.7  | 1 | 398.6  | 33.3 | 2 K.VILSTNIAETSITINDVVYVIDSCK.Q              |
| * | HsFLAG-Lin9_Ti_20  | 3.4934 | 0.1036 | 2085.57 | 2086.329 | 7699.9  | 1 | 504.5  | 44.1 | 2 K.LFTAHNMTNYSTVWASK.T                      |
| * | HsFLAG-p53-DNA-D   | 2.7303 | 0.1485 | 1221.61 | 1222.47  | 5607.6  | 3 | 535.1  | 65   | 6 R.TPLHEIALSIK.L                            |
| * | HsFLAG-p53-DNA-D   | 3.4781 | 0.1698 | 1222.73 | 1222.47  | 7698.8  | 1 | 1498.9 | 85   | 26 R.TPLHEIALSIK.L                           |
| * | HsFlag-NUFIP_Ti_1C | 3.974  | 0.1596 | 1223.41 | 1222.47  | 5612.7  | 1 | 1312.9 | 62.5 | 1 R.TPLHEIALSIK.L                            |
| * | HsFlag-NUFIP_Ti_1C | 3.9303 | 0.2347 | 1004.18 | 1004.217 | 3560.7  | 1 | 933.9  | 94.4 | 11 R.LGGIGQFLAK.A                            |
| * | HsFlag-NUFIP_Ti_1C | 4.1136 | 0.4737 | 1971.78 | 1972.249 | 3150.6  | 1 | 890.6  | 76.5 | 19 K.AIEPPPLDAVIEAHTLR.E                     |
| * | HsFlag-NUFIP_Ti_1C | 4.733  | 0.2738 | 1741.89 | 1742.88  | 8081.9  | 1 | 1942.7 | 70   | 15 R.ELDALDANDELTPLGR.I                      |
| * | HsFlag-NUFIP_Ti_1C | 4.6096 | 0.3089 | 2077.68 | 2078.291 | 7693.1  | 1 | 1524.4 | 44.1 | 8 R.FSDHVALLSVFQAWDDAR.M                     |
| * | HsFlag-NUFIP_Ti_1C | 5.9344 | 0.4643 | 2078.29 | 2078.291 | 9354.7  | 1 | 2131.7 | 67.6 | 29 R.FSDHVALLSVFQAWDDAR.M                    |
| * | HsFlag-NUFIP_Ti_11 | 3.0118 | 0.1301 | 976.6   | 975.197  | 8094.1  | 1 | 1277.9 | 100  | 4 K.RLNMATLR.M                               |
| * | HsFLAG-p53-DNA-D   | 5.4654 | 0.3775 | 1845.43 | 1844.118 | 7887.5  | 1 | 1665.6 | 70   | 7 K.KVQSDGQIVLVDDWIK.L                       |
| * | HsFLAG-FLJ20309_   | 4.8924 | 0.3788 | 1717.24 | 1715.944 | 7152.9  | 1 | 1200.2 | 67.9 | 6 K.VQSDGQIVLVDDWIK.L                        |
| * | HsFlag-NUFIP_Ti_1C | 5.258  | 0.4263 | 1640.29 | 1640.846 | 7628.4  | 1 | 1890   | 75   | 12 K.LQISHEAAACITGLR.A                       |
| * | HsFLAG-FLJ20309_   | 4.5725 | 0.2924 | 1261.29 | 1261.519 | 6164.2  | 1 | 1670.6 | 81.8 | 14 R.AAMEALVVEVTK.Q                          |

|               |                    |        |        |         |          |                                                                           |   |        |      |    |                                           |
|---------------|--------------------|--------|--------|---------|----------|---------------------------------------------------------------------------|---|--------|------|----|-------------------------------------------|
|               | HsFLAG-p53-DNA-D   | 3.5996 | 0.3327 | 2823.05 | 2823.277 | 7397.5                                                                    | 2 | 495.7  | 26   | 1  | R.AAMEALVVEVTKQPAISQLDPVNER.M             |
|               | HsFlag-NUFIP_Ti_1C | 3.4529 | 0.3515 | 1579.91 | 1580.781 | 6517.9                                                                    | 1 | 939.5  | 73.1 | 12 | K.QPAISQLDPVNER.M                         |
|               | HsFLAG-FLJ20309_   | 3.1395 | 0.1749 | 987.26  | 987.103  | 6653.1                                                                    | 4 | 755.5  | 75   | 12 | R.YGDGPRPPK.M                             |
| gi 4503529 re | 12                 | 32     | 47.00% | 406     | 46154    | 5.5 eukaryotic translation initiation factor 4A, isoform 1 [Homo sapiens] |   |        |      |    |                                           |
| *             | HsFlag-VPS71_Ti_1C | 3.56   | 0.2768 | 4168.65 | 4169.451 | 7061.3                                                                    | 1 | 792.5  | 22.9 | 1  | R.SRDNGPDGMEPEGVIESNWNEIVDSFDDMNLSESLLR.G |
|               | HsFLAG-Lin9_Ti_20' | 2.3621 | 0.254  | 1047.39 | 1048.183 | 9240.5                                                                    | 1 | 837.8  | 75   | 2  | R.GIYAYGFEK.P                             |
|               | HsFLAG-ARP6_Ti_1'  | 4.6012 | 0.3935 | 1829.59 | 1829.065 | 4460.2                                                                    | 1 | 954.3  | 73.3 | 7  | R.GIYAYGFEKPSAIQQR.A                      |
|               | HsFlag-VPS71_Ti_1C | 2.4711 | 0.1893 | 1140.69 | 1141.356 | 5645.4                                                                    | 8 | 331.1  | 60   | 1  | K.ATQALVLPATR.E                           |
| *             | HsFLAG-Lin9_Ti_20' | 4.3153 | 0.3344 | 1619.38 | 1619.922 | 6005.9                                                                    | 1 | 1160.8 | 71.4 | 6  | K.LQMEAPHIIVGTPGR.V                       |
|               | HsFlag-VPS71_Ti_1C | 4.883  | 0.3827 | 1556.72 | 1556.789 | 7213.7                                                                    | 1 | 2553.4 | 91.7 | 2  | K.MFVLDEADEMLSR.G                         |
|               | HsFLAG-p53-DNA-D   | 4.3902 | 0.3541 | 1502.13 | 1502.71  | 8870.8                                                                    | 1 | 1923   | 81.8 | 2  | R.GFKDQIYDIFQK.L                          |
| *             | HsFlag-VPS71_Ti_1C | 3.9952 | 0.3051 | 2460.72 | 2460.846 | 6664.5                                                                    | 1 | 605    | 40.9 | 4  | K.LNSNTQVLLSATMPSDVLEVTK.K                |
|               | HsFLAG-FLJ20729_   | 3.4722 | 0.294  | 1582.36 | 1582.743 | 7203.5                                                                    | 1 | 1047.7 | 69.2 | 1  | R.DFTVSAMHGDMQK.E                         |
|               | HsFLAG-Lin9_Ti_20' | 3.6979 | 0.2526 | 1115.19 | 1115.359 | 6528.4                                                                    | 1 | 1517.9 | 94.4 | 2  | R.VLITDILLAR.G                            |
|               | HsFLAG-Lin9_Ti_20' | 5.0028 | 0.364  | 2144.5  | 2145.42  | 8462.8                                                                    | 1 | 1564.8 | 58.3 | 3  | R.GIDVQQVSLVINYLPTNR.E                    |
| *             | HsFLAG-p53-DNA-D   | 2.917  | 0.1347 | 2430.63 | 2428.713 | 6541.5                                                                    | 2 | 518.8  | 42.5 | 1  | R.DIETFYNTSIEEMPLNVADLI.-                 |
| gi 4507691 re | 174                | 848    | 46.90% | 3830    | 434416   | 8.2 transformation/transcription domain-associated protein [Homo sapiens] |   |        |      |    |                                           |
| *             | HsYL1_Ti_103.2312. | 3.5668 | 0.3316 | 2153.73 | 2154.425 | 8321.6                                                                    | 1 | 1042.7 | 52.8 | 1  | K.KYLQFVAALTDVNTPEDETK.L                  |
| *             | HsYL1_Ti_104.2308. | 3.5455 | 0.3415 | 2393.75 | 2395.758 | 9349.2                                                                    | 1 | 1062.5 | 45   | 2  | K.KYLQFVAALTDVNTPEDETKL.K.M               |
| *             | HsMRGBP-FLAG_Ti_   | 5.2741 | 0.3947 | 2027.45 | 2026.251 | 7932.2                                                                    | 1 | 1618.8 | 64.7 | 9  | K.YLQFVAALTDVNTPEDETK.L                   |
| *             | HsMRGBP-FLAG_Ti_   | 4.5144 | 0.2868 | 2268.31 | 2267.584 | 7984.2                                                                    | 1 | 822.6  | 44.7 | 9  | K.YLQFVAALTDVNTPEDETKL.K.M                |
| *             | HsMRGBP-FLAG_Ti_   | 5.7757 | 0.4184 | 3315.49 | 3315.697 | 4958.8                                                                    | 1 | 781.1  | 32.4 | 4  | K.MMQEVSENFENVTSPPQYSTFLEHIIPR.F          |
| *             | HsMRGBP-FLAG_Ti_   | 6.0558 | 0.4182 | 1943.73 | 1943.207 | 8445.4                                                                    | 1 | 2498   | 80   | 11 | R.FLTFLQDGEVQFLQEK.P                      |
| *             | HsYL1_Ti_103.2775. | 4.4155 | 0.4102 | 2637.05 | 2637.01  | 5117.7                                                                    | 1 | 691.2  | 47.6 | 2  | R.FLTFLQDGEVQFLQEKPAQQLR.K                |
| *             | HsMRGBP-FLAG_Ti_   | 3.0437 | 0.0847 | 994.63  | 993.238  | 4641.3                                                                    | 7 | 983.3  | 92.9 | 1  | K.LVLEIHR.I                               |
| *             | HsFLAG-TIP49b_Ti_  | 2.4131 | 0.1222 | 824.5   | 823.971  | 4496.4                                                                    | 1 | 385.4  | 83.3 | 2  | R.THSIIPR.G                               |
| *             | HsMRGBP-FLAG_Ti_   | 3.6184 | 0.3583 | 1382.75 | 1382.599 | 3942.6                                                                    | 1 | 513.5  | 72.7 | 3  | K.ELYADFIAAQIK.T                          |
| *             | HsMRGBP-FLAG_Ti_   | 4.4022 | 0.3539 | 1384.38 | 1382.599 | 7284.7                                                                    | 1 | 1527.2 | 81.8 | 12 | K.ELYADFIAAQIK.T                          |
| *             | HsFLAG-TIP49b_Ti_  | 4.7984 | 0.4272 | 1911.44 | 1912.18  | 6322.1                                                                    | 1 | 1006.7 | 62.5 | 5  | K.GMLQLLSNCPAETAHLR.K                     |
| *             | HsTIP60_Ti_106.214 | 3.081  | 0.2766 | 983.13  | 983.156  | 3072.3                                                                    | 1 | 633.4  | 92.9 | 2  | K.HILTTEL.R.N                             |
| *             | HsMRGBP-FLAG_Ti_   | 4.0489 | 0.3996 | 1642.77 | 1642.849 | 5256.6                                                                    | 1 | 1161.4 | 75   | 8  | K.LFDESILIGSGYTAR.E                       |
| *             | HsYL1_Ti_106.2539. | 5.0655 | 0.3627 | 2193.13 | 2192.526 | 7346.4                                                                    | 1 | 1436.8 | 45.8 | 2  | R.ETLRPLAYSTLADLVHHR.Q                    |
| *             | HsYL1_Ti_105.3244. | 2.6373 | 0.1391 | 1881.69 | 1881.225 | 3301.7                                                                    | 1 | 254.7  | 50   | 1  | R.QHLPLSDLAVLQFAK.N                       |
| *             | HsTIP60_Ti_103.197 | 5.2013 | 0.4339 | 1925.11 | 1926.069 | 3470.1                                                                    | 1 | 819.6  | 71.9 | 5  | K.NIDDESLPSSIQTMCK.L                      |
| *             | HsMRGBP-FLAG_Ti_   | 2.322  | 0.2515 | 1228.68 | 1229.472 | 4185                                                                      | 2 | 393.1  | 72.2 | 3  | K.LLLNLVDCIR.S                            |
| *             | HsMRGBP-FLAG_Ti_   | 3.6553 | 0.1501 | 1230.63 | 1229.472 | 7314.1                                                                    | 3 | 1815.3 | 94.4 | 8  | K.LLLNLVDCIR.S                            |
| *             | HsMRGBP-FLAG_Ti_   | 2.481  | 0.1187 | 969.47  | 970.156  | 6935.4                                                                    | 2 | 903.2  | 78.6 | 1  | R.YQLSAIFK.K                              |
| *             | HsTIP60_Ti_101.156 | 2.7211 | 0.2915 | 1156.27 | 1155.219 | 6770.7                                                                    | 2 | 690.4  | 75   | 2  | K.QTFQVTDCCR.S                            |
| *             | HsMRGBP-FLAG_Ti_   | 2.0682 | 0.1513 | 1166.47 | 1167.314 | 6357.9                                                                    | 1 | 561.5  | 66.7 | 1  | K.TITWGITSCK.A                            |
| *             | HsTIP60_Ti_104.190 | 2.9682 | 0.1736 | 1167.77 | 1167.314 | 4362.9                                                                    | 1 | 637.4  | 77.8 | 1  | K.TITWGITSCK.A                            |
| *             | HsMRGBP-FLAG_Ti_   | 2.4169 | 0.164  | 1171.57 | 1172.326 | 4616.2                                                                    | 5 | 459.5  | 65   | 3  | K.APGEAQFIPNK.Q                           |
| *             | HsMRGBP-FLAG_Ti_   | 3.7033 | 0.2405 | 1172.56 | 1172.326 | 5342.8                                                                    | 1 | 1340.3 | 90   | 4  | K.APGEAQFIPNK.Q                           |
| *             | HsMRGBP-FLAG_Ti_   | 4.277  | 0.3382 | 2518.25 | 2517.862 | 7627.1                                                                    | 1 | 1292.3 | 50   | 2  | K.YAMQALDIYQVQIAGNGQTYIR.V                |

|   |                    |        |        |         |          |         |   |        |      |                                |
|---|--------------------|--------|--------|---------|----------|---------|---|--------|------|--------------------------------|
| * | HsYL1_Ti_104.3362. | 2.7062 | 0.1972 | 2212.41 | 2212.63  | 7913.7  | 1 | 790.7  | 47.2 | 1 K.EVLEHFAGVFTMMNPLTFK.E      |
| * | HsMRGBP-FLAG_Ti    | 2.8153 | 0.2358 | 1391.6  | 1392.61  | 5175.7  | 2 | 386.5  | 58.3 | 3 K.IVNSSMELAQTAK.E            |
| * | HsMRGBP-FLAG_Ti    | 4.8102 | 0.129  | 1393.87 | 1392.61  | 7667.4  | 1 | 1985.1 | 83.3 | 2 K.IVNSSMELAQTAK.E            |
| * | HsMRGBP-FLAG_Ti    | 4.4403 | 0.2547 | 2686.78 | 2686.99  | 6975.2  | 3 | 937.8  | 34.5 | 5 R.TLELCVDNLQPDFLYDHIQPV.R.A  |
| * | HsMRGBP-FLAG_Ti    | 4.2766 | 0.2729 | 2686.95 | 2686.99  | 4561.7  | 1 | 454.4  | 45.2 | 15 R.TLELCVDNLQPDFLYDHIQPV.R.A |
| * | HsFLAG-TIP49b_Ti   | 2.4449 | 0.0832 | 1117.49 | 1118.339 | 4424.1  | 4 | 358.9  | 75   | 2 R.AELMQALWR.T                |
| * | HsH2AZ-FLAG_293    | 2.959  | 0.2698 | 1700.69 | 1700.895 | 3806.3  | 1 | 632.4  | 67.9 | 1 R.TLRNPADSISHVAYR.V          |
| * | HsFLAG-TIP49b_Ti   | 4.3102 | 0.261  | 1701.31 | 1700.895 | 7529.1  | 1 | 1552.9 | 50   | 2 R.TLRNPADSISHVAYR.V          |
| * | HsH2AZ-FLAG_293    | 4.3352 | 0.3124 | 1331.38 | 1330.443 | 7606    | 1 | 1747.6 | 86.4 | 7 R.NPADSISHVAYR.V             |
| * | HsFLAG-TIP49b_Ti   | 5.2769 | 0.3889 | 2410.32 | 2409.664 | 7123.7  | 1 | 1489.2 | 62.5 | 4 K.LHYVVTEVQGSPSITVEFSDCK.A   |
| * | HsMRGBP-FLAG_Ti    | 2.8753 | 0.1876 | 1133.61 | 1134.281 | 8534.7  | 1 | 669.5  | 61.1 | 6 K.AIETALDCLK.S               |
| * | HsTIP60_Ti_103.190 | 3.3927 | 0.2475 | 1134.03 | 1134.281 | 6493.3  | 1 | 1207.9 | 83.3 | 2 K.AIETALDCLK.S               |
| * | HsFLAG-TIP49b_Ti   | 4.6919 | 0.2512 | 1782.73 | 1783.04  | 7661.1  | 1 | 1984.5 | 55.4 | 1 K.HALYQLLAHPNFTEK.T          |
| * | HsMRGBP-FLAG_Ti    | 5.235  | 0.4197 | 1784.87 | 1783.04  | 6748.5  | 1 | 1693.5 | 78.6 | 7 K.HALYQLLAHPNFTEK.T          |
| * | HsYL1_Ti_104.3068. | 3.6419 | 0.3463 | 1841.86 | 1843.191 | 6230.7  | 1 | 1143.3 | 65.6 | 3 R.KTFEQALTGFMSAVIK.D         |
| * | HsYL1_Ti_104.3075. | 3.6442 | 0.3057 | 1843.75 | 1843.191 | 6635    | 2 | 966.5  | 39.1 | 1 R.KTFEQALTGFMSAVIK.D         |
| * | HsMRGBP-FLAG_Ti    | 6.1166 | 0.4341 | 1714.88 | 1715.017 | 6253.6  | 1 | 1967.4 | 80   | 10 K.TFEQALTGFMSAVIK.D         |
| * | HsMRGBP-FLAG_Ti    | 5.0588 | 0.351  | 1716.05 | 1715.017 | 7544.2  | 1 | 2203.4 | 53.3 | 5 K.TFEQALTGFMSAVIK.D          |
| * | HsYL1_Ti_105.2963. | 3.9995 | 0.2085 | 1655.7  | 1655.981 | 5837.6  | 8 | 916.3  | 42.9 | 1 K.DLRPSALPFVASLIR.H          |
| * | HsH2AZ-FLAG_293    | 3.7736 | 0.252  | 1596.37 | 1596.833 | 3512.6  | 1 | 792.1  | 79.2 | 2 R.ACQLPLFSYIVER.L            |
| * | HsMRGBP-FLAG_Ti    | 4.3156 | 0.3825 | 1724.76 | 1723.821 | 7138    | 1 | 1501.8 | 75   | 1 R.LCACCEQAWYAK.L             |
| * | HsFLAG-TIP49a_Ti   | 3.6765 | 0.3541 | 1830.95 | 1830.18  | 5027.2  | 1 | 587.1  | 57.1 | 5 R.LPLTWVLQNNQQTFLK.A         |
| * | HsMRGBP-FLAG_Ti    | 3.5102 | 0.0933 | 1105.53 | 1105.338 | 6864.6  | 1 | 1400.4 | 93.8 | 6 K.TTLEQLLMR.C                |
| * | HsMRGBP-FLAG_Ti    | 4.291  | 0.341  | 2288.57 | 2288.483 | 5069.4  | 1 | 495.1  | 32.9 | 2 R.CATPLKDEERAEIVAAQEK.S      |
| * | HsYL1_Ti_101.1266. | 2.4972 | 0.0943 | 1087.65 | 1088.203 | 6963.9  | 2 | 753.2  | 61.1 | 1 R.AEEIVAAQEK.S               |
| * | HsFLAG-TIP49b_Ti   | 3.6146 | 0.4167 | 1348.38 | 1348.507 | 7210.5  | 1 | 1371.3 | 80   | 3 K.SFHVTHDLVR.E               |
| * | HsH2AZ-FLAG_293    | 4.4963 | 0.2952 | 1610.49 | 1611.9   | 7041.2  | 1 | 1397.7 | 71.4 | 8 K.QAMHSLQVLAQVTGK.S          |
| * | HsTIP60_Ti_105.149 | 2.647  | 0.2747 | 1140.42 | 1141.371 | 6952.1  | 7 | 467.3  | 61.1 | 2 K.SVTVIMEPHK.E               |
| * | HsTIP60_Ti_105.149 | 2.932  | 0.2304 | 1141.19 | 1141.371 | 5514.5  | 1 | 748.4  | 77.8 | 4 K.SVTVIMEPHK.E               |
| * | HsMRGBP-FLAG_Ti    | 4.4969 | 0.3925 | 2585.85 | 2585.863 | 7000.4  | 1 | 767.1  | 47.7 | 2 R.HQPANAQIGLMGNTFCTTLQPR.L   |
| * | HsFLAG-TIP49b_Ti   | 3.5165 | 0.2567 | 1446.42 | 1446.704 | 8290.5  | 4 | 812    | 63.6 | 4 R.LFTMDLNVVEHK.V             |
| * | HsH2AZ-FLAG_293    | 6.0473 | 0.4576 | 2217.34 | 2217.444 | 6151.7  | 1 | 1431.3 | 66.7 | 26 K.VFYTELLNLCEAEDSALTK.L     |
| * | HsMRGBP-FLAG_Ti    | 5.1405 | 0.4151 | 2219.9  | 2217.444 | 10868.8 | 1 | 2339.1 | 45.8 | 1 K.VFYTELLNLCEAEDSALTK.L      |
| * | HsH2AZ-FLAG_293    | 3.9758 | 0.1583 | 1846.48 | 1847.091 | 5227.9  | 1 | 889.6  | 59.4 | 4 R.IAALNALAACNYLPQSR.E        |
| * | HsMRGBP-FLAG_Ti    | 5.789  | 0.4909 | 1981.69 | 1982.096 | 9366    | 1 | 2324   | 70.6 | 7 K.ALNSTNSELQEAGEACMR.K       |
| * | HsTIP60_Ti_104.174 | 3.2128 | 0.2035 | 1016.2  | 1016.186 | 6470.3  | 8 | 1055.7 | 87.5 | 4 R.SLTLNVVNR.L                |
| * | HsFLAG-TIP49b_Ti   | 3.2558 | 0.2374 | 1367.46 | 1366.562 | 8738.3  | 1 | 1360.3 | 77.8 | 4 K.FCDQMMQHLR.K               |
| * | HsFLAG-TIP49b_Ti   | 4.9531 | 0.2888 | 1773.93 | 1773.144 | 9846.7  | 1 | 1446.8 | 63.3 | 8 R.AMLIEAGSPFREPLIK.F         |
| * | HsH2AZ-FLAG_293    | 3.1457 | 0.1132 | 970.25  | 970.073  | 5969.5  | 6 | 1083.9 | 81.2 | 1 R.DVLAANPNR.F                |
| * | HsYL1-FLAG_Ti_206  | 2.7844 | 0.096  | 1558.16 | 1557.877 | 3759.4  | 5 | 622.7  | 60.7 | 1 R.FITLLLPGGAQTAVR.P          |
| * | HsMRGBP-FLAG_Ti    | 4.3567 | 0.2916 | 1956.72 | 1957.11  | 6707.6  | 1 | 1191.1 | 62.5 | 2 K.NDDSWLASQHSLSVQLR.R        |
| * | HsMRGBP-FLAG_Ti    | 4.0474 | 0.2769 | 1957.33 | 1957.11  | 6127.5  | 1 | 923.4  | 39.1 | 2 K.NDDSWLASQHSLSVQLR.R        |
| * | HsFLAG-TIP49b_Ti   | 4.2824 | 0.3745 | 1450.33 | 1450.597 | 8317.2  | 1 | 1742.6 | 90   | 5 R.RVWVSENFQER.H              |

|   |                    |        |        |         |          |        |   |        |      |                                         |
|---|--------------------|--------|--------|---------|----------|--------|---|--------|------|-----------------------------------------|
| * | HsTIP60_Ti_105.177 | 3.399  | 0.1172 | 1294.36 | 1294.409 | 5102.8 | 3 | 787.8  | 77.8 | 3 R.VWVSENFQER.H                        |
| * | HsTIP60_Ti_106.265 | 2.9078 | 0.2091 | 1431.49 | 1431.647 | 8111.1 | 5 | 644.5  | 60   | 3 K.LLAYCLLNICK.R                       |
| * | HsMRGBP-FLAG_Ti    | 3.8095 | 0.3046 | 1432.34 | 1431.647 | 6202.3 | 1 | 1378.7 | 85   | 4 K.LLAYCLLNICK.R                       |
| * | HsYL1_Ti_105.2055. | 3.008  | 0.2151 | 1588.08 | 1587.835 | 6836   | 1 | 1353.4 | 77.3 | 2 K.LLAYCLLNICKR.N                      |
| * | HsFLAG-TIP49b_Ti_  | 3.3308 | 0.3112 | 1750.61 | 1751.038 | 6359.5 | 2 | 566.3  | 57.7 | 1 K.RNYGDIELLFQLLR.A                    |
| * | HsMRGBP-FLAG_Ti    | 5.3487 | 0.3382 | 1597.14 | 1594.851 | 6983   | 1 | 2054.9 | 87.5 | 17 R.NYGDIELLFQLLR.A                    |
| * | HsMRGBP-FLAG_Ti    | 3.5552 | 0.2113 | 1175.46 | 1174.41  | 3513.8 | 1 | 810.2  | 87.5 | 2 R.FLCNMTFLK.E                         |
| * | HsH2AZ-FLAG_293_   | 4.5405 | 0.3715 | 1657.33 | 1657.777 | 5109   | 1 | 1466.1 | 84.6 | 19 R.FVDFNDPNFGDELK.A                   |
| * | HsH2AZ-FLAG_293_   | 5.2143 | 0.3193 | 1919.64 | 1920.262 | 5120.4 | 1 | 1367.9 | 76.7 | 8 K.VLQHILNPAFLYSFEK.G                  |
| * | HsYL1_Ti_106.2867. | 4.2424 | 0.5152 | 4726.58 | 4728.312 | 6975.3 | 1 | 579.4  | 21.4 | 1 TK.V                                  |
| * | HsFLAG-TIP49a_Ti_  | 4.625  | 0.3611 | 2826.91 | 2827.074 | 6022.9 | 1 | 740    | 44.2 | 14 K.GEGEQLLGPPEGDNPESITSVFITK.V        |
| * | HsTIP60_Ti_105.305 | 4.6466 | 0.3445 | 2827.68 | 2827.074 | 5584.7 | 1 | 940.8  | 33.7 | 3 K.GEGEQLLGPPEGDNPESITSVFITK.V         |
| * | HsYL1_Ti_103.2920. | 3.6116 | 0.2941 | 1467.57 | 1467.776 | 4674   | 1 | 1059.1 | 81.8 | 10 R.LMTFAWPCLLSK.A                     |
| * | HsYL1-FLAG_Ti_206  | 1.8726 | 0.106  | 1468.81 | 1467.776 | 4246.4 | 1 | 296.2  | 54.5 | 1 R.LMTFAWPCLLSK.A                      |
| * | HsFLAG-TIP49b_Ti_  | 3.6979 | 0.2506 | 1297.32 | 1297.627 | 7197.9 | 1 | 1453.3 | 85   | 5 K.IVLQVFHSLK.A                        |
| * | HsTIP60_Ti_105.195 | 4.2234 | 0.3372 | 1339.56 | 1339.639 | 6584   | 1 | 1496.1 | 79.2 | 3 R.QAMAILTPAVPAR.M                     |
| * | HsMRGBP-FLAG_Ti    | 4.216  | 0.3553 | 1642.69 | 1642.847 | 5428   | 1 | 1270.8 | 75   | 2 R.MEDGHQMLTHWTR.K                     |
| * | HsMRGBP-FLAG_Ti    | 2.1667 | 0.116  | 1347.73 | 1348.542 | 3755.8 | 3 | 168.8  | 54.5 | 1 R.LGFTPSVTIEQR.R                      |
| * | HsMRGBP-FLAG_Ti    | 3.8217 | 0.3372 | 1348.51 | 1348.542 | 4066.6 | 1 | 699.6  | 81.8 | 8 R.LGFTPSVTIEQR.R                      |
| * | HsMRGBP-FLAG_Ti    | 2.3107 | 0.2594 | 1185.73 | 1186.434 | 8065.1 | 7 | 521.1  | 55   | 1 R.LAVDLSEVVIK.W                       |
| * | HsMRGBP-FLAG_Ti    | 3.5917 | 0.1499 | 1186.96 | 1186.434 | 5271.3 | 1 | 1354.9 | 90   | 4 R.LAVDLSEVVIK.W                       |
| * | HsTIP60_Ti_104.161 | 5.146  | 0.3589 | 2821.81 | 2822.972 | 6409.1 | 1 | 1263   | 35.6 | 2 R.IKDQQPDSMDPNSSGEGVNSVSSSIK.R        |
| * | HsTIP60_Ti_104.161 | 4.0813 | 0.5323 | 2822.59 | 2822.972 | 3884.1 | 1 | 589.9  | 46.2 | 1 R.IKDQQPDSMDPNSSGEGVNSVSSSIK.R        |
| * | HsMRGBP-FLAG_Ti    | 5.1423 | 0.4857 | 2580.67 | 2581.638 | 5187.7 | 1 | 984.7  | 54.2 | 3 K.DQQPDSMDPNSSGEGVNSVSSSIK.R          |
| * | HsFLAG-TIP49b_Ti_  | 3.3484 | 0.1711 | 1289    | 1289.431 | 5427.7 | 5 | 729    | 68.2 | 5 K.RGLSVDSAQEVK.R                      |
| * | HsTIP60_Ti_105.204 | 4.3694 | 0.3937 | 1150.69 | 1151.308 | 6809.8 | 1 | 1716.1 | 90.9 | 14 R.TATGAISAVFGR.S                     |
| * | HsMRGBP-FLAG_Ti    | 2.4241 | 0.3366 | 1150.74 | 1151.308 | 3684.2 | 1 | 236    | 63.6 | 7 R.TATGAISAVFGR.S                      |
| * | HsMRGBP-FLAG_Ti    | 2.4942 | 0.1412 | 1286.51 | 1287.456 | 5829.9 | 1 | 443.1  | 54.2 | 1 R.SQSLPGADSLAK.P                      |
| * | HsMRGBP-FLAG_Ti    | 4.2831 | 0.3096 | 1742.07 | 1740.995 | 3428.5 | 1 | 663.8  | 71.9 | 11 R.SQSLPGADSLAKPIDK.Q                 |
| * | HsH2AZ-FLAG_293_   | 5.8156 | 0.4615 | 2190.04 | 2190.298 | 6949.2 | 1 | 1369.8 | 60   | 14 R.VACQVNDTNTAGSPGEVLSR.R             |
| * | HsYL1_Ti_102.1351. | 2.8193 | 0.384  | 1283.35 | 1284.402 | 4091.2 | 1 | 316.1  | 59.1 | 3 R.GIAACMTGNTK.V                       |
| * | HsTIP60_Ti_104.239 | 2.8435 | 0.2584 | 1783.12 | 1783.047 | 3513.1 | 1 | 305.2  | 46.9 | 1 R.LMSIFPTEPTSSVASK.Y                  |
| * | HsH2AZ-FLAG_293_   | 4.5537 | 0.4367 | 1545.21 | 1545.695 | 7513.7 | 1 | 1716.7 | 79.2 | 4 K.YEELECLYA AVGK.V                    |
| * | HsMRGBP-FLAG_Ti    | 2.7367 | 0.2534 | 1328.53 | 1329.492 | 5238.6 | 1 | 479.9  | 65   | 3 K.VIYEGLTNYEK.A                       |
| * | HsMRGBP-FLAG_Ti    | 3.5988 | 0.3612 | 1331.37 | 1329.492 | 4489.1 | 1 | 1127.9 | 90   | 4 K.VIYEGLTNYEK.A                       |
| * | HsTIP60_Ti_106.307 | 5.0677 | 0.307  | 1819.5  | 1820.157 | 4176.4 | 1 | 1071.4 | 75   | 10 K.ATNANPSQLFGTLMILK.S                |
| * | HsH2AZ-FLAG_293_   | 3.1042 | 0.3507 | 1385.13 | 1384.411 | 5706.1 | 1 | 1068.9 | 81.8 | 1 K.SACSNPSYIDR.L                       |
| * | HsMRGBP-FLAG_Ti    | 4.0796 | 0.1736 | 3101.33 | 3101.453 | 9099.3 | 1 | 1080.7 | 27.6 | 3 R.EHLNPQAASGSTEATSGTSELVMLSLELVK.T    |
| * | HsYL1_Ti_106.3140. | 5.2571 | 0.2841 | 1618.94 | 1618.957 | 7305.8 | 1 | 2571   | 88.5 | 2 R.KNFIQAILTSLIEK.S                    |
| * | HsMRGBP-FLAG_Ti    | 2.952  | 0.1243 | 1489.84 | 1490.783 | 7159.8 | 1 | 607.7  | 62.5 | 5 K.NFIQAILTSLIEK.S                     |
| * | HsMRGBP-FLAG_Ti    | 5.399  | 0.2304 | 1491.23 | 1490.783 | 9071.3 | 1 | 2742.5 | 87.5 | 41 K.NFIQAILTSLIEK.S                    |
| * | HsFLAG-TIP49b_Ti_  | 3.6663 | 0.3029 | 1515.37 | 1515.684 | 9803.5 | 1 | 1206.7 | 69.2 | 5 K.NNSPMAANQTPTLR.E                    |
| * | HsMRGBP-FLAG_Ti    | 3.7573 | 0.1907 | 3849.02 | 3848.258 | 8419.7 | 1 | 880.5  | 25.8 | 3 K.RFPEDLELNAQFLDLVNYVYRDETLSGSELTAK.L |

|   |                    |        |        |         |          |        |   |        |      |                                        |
|---|--------------------|--------|--------|---------|----------|--------|---|--------|------|----------------------------------------|
| * | HsMRGBP-FLAG_Ti    | 5.318  | 0.2229 | 3693.63 | 3692.07  | 7329.5 | 1 | 633.5  | 23.4 | 6 R.FPEDLELNAQFLDLVNYVYRDETLSGSELTAK.L |
| * | HsMRGBP-FLAG_Ti    | 2.6565 | 0.1435 | 1103.45 | 1103.307 | 2810   | 4 | 586.9  | 83.3 | 1 K.LEPAFLSGLR.C                       |
| * | HsTIP60_Ti_105.245 | 3.0004 | 0.1592 | 1264.6  | 1264.438 | 6771.1 | 1 | 693.6  | 72.2 | 5 K.FFEVFDNSMK.R                       |
| * | HsMRGBP-FLAG_Ti    | 3.3018 | 0.182  | 1265.51 | 1264.438 | 4702.7 | 2 | 1116.5 | 88.9 | 3 K.FFEVFDNSMK.R                       |
| * | HsFLAG-TIP49a_Ti_  | 4.0573 | 0.2895 | 2959.09 | 2957.251 | 5000.5 | 1 | 511.8  | 27.8 | 2 K.STPIGTSCQGAMLPSITNVINLADSHDR.A     |
| * | HsFLAG-TIP49a_Ti_  | 2.4935 | 0.3571 | 1074.36 | 1075.314 | 3623.2 | 1 | 480.9  | 66.7 | 1 R.AAFAMVTHVK.Q                       |
| * | HsFLAG-TIP49b_Ti_  | 3.7082 | 0.3573 | 1075.32 | 1075.314 | 6028.2 | 1 | 1168.4 | 83.3 | 10 R.AAFAMVTHVK.Q                      |
| * | HsYL1_Ti_106.2015. | 4.3602 | 0.3204 | 1586.66 | 1585.864 | 6857.5 | 1 | 1346.9 | 73.1 | 1 R.AAFAMVTHVKQEPR.E                   |
| * | HsMRGBP-FLAG_Ti    | 4.1413 | 0.3656 | 1411.47 | 1412.607 | 7131   | 1 | 1586.3 | 86.4 | 10 K.DIGNQLHMLTNR.H                    |
| * | HsFLAG-TIP49b_Ti_  | 3.6793 | 0.3064 | 1792.47 | 1793.01  | 7328.3 | 1 | 844.8  | 60.7 | 3 K.DIGNQLHMLTNRHDK.F                  |
| * | HsH2AZ-FLAG_293_   | 5.7303 | 0.4505 | 2260.42 | 2261.59  | 8279.5 | 1 | 2106.1 | 62.5 | 15 K.TGALLSAFVQLCHISTTLAEK.T           |
| * | HsTIP60_Ti_106.269 | 3.3253 | 0.1384 | 1047.28 | 1047.245 | 4395   | 6 | 970.3  | 92.9 | 1 K.TWVQLFPR.L                         |
| * | HsMRGBP-FLAG_Ti    | 3.2661 | 0.3656 | 1433.74 | 1434.65  | 5056.1 | 1 | 653.5  | 63.6 | 2 R.STLMLEHQAFEK.G                     |
| * | HsFLAG-TIP49b_Ti_  | 4.0864 | 0.3705 | 1434.32 | 1434.65  | 7107   | 1 | 1548.2 | 81.8 | 4 R.STLMLEHQAFEK.G                     |
| * | HsFLAG-TIP49b_Ti_  | 3.1519 | 0.1081 | 984.15  | 984.227  | 5708.6 | 1 | 1108.4 | 87.5 | 2 K.GLSLQIKPK.Q                        |
| * | HsMRGBP-FLAG_Ti    | 5.1958 | 0.3385 | 2928.64 | 2929.082 | 6222.6 | 1 | 1248.5 | 35.4 | 6 K.YSETATAIAYEQHGFFEQAQESYEK.A        |
| * | HsMRGBP-FLAG_Ti    | 4.2831 | 0.384  | 2928.81 | 2929.082 | 8044.3 | 1 | 389.4  | 29.2 | 6 K.YSETATAIAYEQHGFFEQAQESYEK.A        |
| * | HsMRGBP-FLAG_Ti    | 3.5891 | 0.3534 | 2461.85 | 2460.711 | 4227.5 | 1 | 366.3  | 44.7 | 8 R.SNASPAIFPEYQLWEDHWIR.C             |
| * | HsH2AZ-FLAG_293_   | 4.8802 | 0.3196 | 1795.79 | 1796.931 | 7435.9 | 1 | 1589.1 | 75   | 8 K.ELNQWEALTEYGQSK.G                  |
| * | HsYL1_Ti_105.2544. | 3.7886 | 0.4501 | 1729.67 | 1728.957 | 4007.7 | 1 | 736.6  | 65.4 | 1 K.GHINPYLVLECAWR.V                   |
| * | HsYL1_Ti_102.1623. | 3.447  | 0.2501 | 1359.5  | 1359.529 | 3335.5 | 1 | 331.4  | 63.6 | 5 K.EALVQEVSCPK.E                      |
| * | HsMRGBP-FLAG_Ti    | 3.7712 | 0.3442 | 1359.87 | 1359.529 | 6552.7 | 1 | 1248.7 | 77.3 | 4 K.EALVQEVSCPK.E                      |
| * | HsMRGBP-FLAG_Ti    | 5.3828 | 0.3826 | 2190.9  | 2191.414 | 4205.4 | 1 | 1233   | 76.5 | 15 R.GYLAICHPEEQQLSFIER.L              |
| * | HsMRGBP-FLAG_Ti    | 4.0973 | 0.3424 | 2193.22 | 2191.414 | 5397.1 | 1 | 1034.4 | 42.6 | 2 R.GYLAICHPEEQQLSFIER.L               |
| * | HsMRGBP-FLAG_Ti    | 3.7898 | 0.2326 | 1190.92 | 1190.444 | 6620.6 | 1 | 2172.8 | 95   | 4 R.LVEMASSLAIR.E                      |
| * | HsFLAG-TIP49b_Ti_  | 4.2227 | 0.4022 | 1526.81 | 1526.82  | 7383.8 | 1 | 1507.8 | 73.1 | 4 R.KQGLVNVALDILSR.I                   |
| * | HsMRGBP-FLAG_Ti    | 3.9291 | 0.3538 | 1399.19 | 1398.646 | 7209.6 | 1 | 1194.2 | 79.2 | 6 K.QGLVNVALDILSR.I                    |
| * | HsFLAG-TIP49b_Ti_  | 3.9065 | 0.3231 | 1768.49 | 1769.06  | 3912.5 | 1 | 464.2  | 60.7 | 8 R.IHTIPTVPIVDCFQK.I                  |
| * | HsTIP60_Ti_105.236 | 4.9108 | 0.4066 | 1866.24 | 1866.06  | 8763.3 | 1 | 1931.9 | 73.3 | 7 K.NECMQGLEVIESTNLK.Y                 |
| * | HsFLAG-TIP49b_Ti_  | 4.8922 | 0.3584 | 1516.62 | 1516.799 | 8398.9 | 1 | 1912.7 | 80.8 | 12 K.AFSAAVQMHDVLVK.A                  |
| * | HsMRGBP-FLAG_Ti    | 5.0671 | 0.4483 | 1843.55 | 1844.138 | 5541.4 | 1 | 1575.9 | 78.6 | 3 K.AWAMWGDYLENIFVK.E                  |
| * | HsH2AZ-FLAG_293_   | 3.7454 | 0.2117 | 1352.67 | 1351.542 | 5740   | 1 | 1325.4 | 90   | 3 K.VLWLLSFDDDK.N                      |
| * | HsMRGBP-FLAG_Ti    | 4.7436 | 0.0938 | 1227.48 | 1226.505 | 7209.9 | 1 | 1998.2 | 95   | 4 K.LLLNLISQVGR.V                      |
| * | HsMRGBP-FLAG_Ti    | 2.4301 | 0.2211 | 1352.65 | 1353.607 | 6559   | 3 | 515.9  | 65   | 2 R.VYPQAVYFPIR.T                      |
| * | HsFLAG-TIP49b_Ti_  | 3.7044 | 0.4324 | 2471.29 | 2471.877 | 9453.9 | 1 | 897.9  | 47.5 | 1 R.ELHPTLLSSLEGIVDQMVWFR.E            |
| * | HsTIP60_Ti_102.164 | 2.5265 | 0.3024 | 1004.16 | 1004.094 | 4345.1 | 2 | 706    | 92.9 | 1 K.CYSVAFEK.S                         |
| * | HsFLAG-TIP49b_Ti_  | 2.5471 | 0.1389 | 1169.55 | 1170.397 | 6493.2 | 7 | 551.2  | 66.7 | 2 K.ITPHTLNFVK.K                       |
| * | HsMRGBP-FLAG_Ti    | 4.0786 | 0.4092 | 2960.9  | 2962.301 | 5519.1 | 1 | 476.5  | 33.9 | 3 K.LVSTFGVGLENVSNVSTMFSSAASESLAR.R    |
| * | HsH2AZ-FLAG_293_   | 3.4393 | 0.1458 | 1459.9  | 1460.633 | 3221.9 | 1 | 646.8  | 75   | 8 R.RAQATAQDPVFQK.L                    |
| * | HsYL1_Ti_102.1383. | 3.0979 | 0.337  | 1303.53 | 1304.445 | 3794.7 | 1 | 311    | 59.1 | 1 R.AQATAQDPVFQK.L                     |
| * | HsTIP60_Ti_102.146 | 4.1856 | 0.3557 | 1304.96 | 1304.445 | 8668.4 | 1 | 1492.5 | 77.3 | 2 R.AQATAQDPVFQK.L                     |
| * | HsMRGBP-FLAG_Ti    | 4.3585 | 0.3629 | 1765.93 | 1764.947 | 5640.1 | 1 | 873.9  | 60   | 6 K.GQFTTDFDFSVPGSMK.L                 |
| * | HsMRGBP-FLAG_Ti    | 4.2806 | 0.3165 | 2457.81 | 2456.816 | 5710.6 | 1 | 660.7  | 45.2 | 3 R.FLSNFSAQTAEEVPEIFLMPK.P            |

|                |                    |        |        |         |          |         |                                                            |        |      |    |                                          |
|----------------|--------------------|--------|--------|---------|----------|---------|------------------------------------------------------------|--------|------|----|------------------------------------------|
| *              | HsFLAG-TIP49b_Ti_  | 3.9321 | 0.185  | 3359.52 | 3359.864 | 7428.4  | 1                                                          | 1011.2 | 28.6 | 1  | R.FLSNFSAQTA EVEIPG EFLMPKPTHYYIK.I      |
| *              | HsTIP60_Ti_105.261 | 5.186  | 0.4902 | 1945.36 | 1946.192 | 5823.3  | 1                                                          | 1392.9 | 73.3 | 2  | K.IYPYLV MNDA CLTESR.R                   |
| *              | HsFLAG-TIP49b_Ti_  | 2.733  | 0.2052 | 1017.14 | 1017.219 | 4636.1  | 1                                                          | 841.2  | 92.9 | 1  | R.HLFFTVPR.V                             |
| *              | HsYL1_Ti_102.2196. | 5.6996 | 0.3537 | 1808.03 | 1807.051 | 4485.1  | 1                                                          | 1264   | 80   | 27 | R.LVEDNPSSLSLVEIYK.Q                     |
| *              | HsFLAG-TIP49b_Ti_  | 3.9029 | 0.3858 | 1266.48 | 1266.399 | 7198.9  | 1                                                          | 1631.3 | 90   | 7  | K.KGIEHDNPISR.Y                          |
| *              | HsMRGBP-FLAG_Ti_   | 2.8703 | 0.3343 | 1266.76 | 1266.399 | 5211.1  | 1                                                          | 523    | 70   | 4  | K.KGIEHDNPISR.Y                          |
| *              | HsH2AZ-FLAG_293_   | 3.2103 | 0.3297 | 1138.35 | 1138.225 | 6959    | 1                                                          | 1029.9 | 77.8 | 8  | K.KGIEHDNPISR.Y                          |
| *              | HsTIP60_Ti_105.100 | 3.0457 | 0.224  | 1097.5  | 1097.219 | 6660.7  | 1                                                          | 1206.1 | 83.3 | 4  | R.GTQASHQVLR.D                           |
| *              | HsMRGBP-FLAG_Ti_   | 3.4848 | 0.3371 | 2156.07 | 2156.364 | 5064    | 1                                                          | 591.6  | 50   | 3  | K.EWALHTFPNATDYWTFR.K                    |
| *              | HsMRGBP-FLAG_Ti_   | 2.9047 | 0.2426 | 2759.9  | 2761.249 | 5260.9  | 1                                                          | 382.7  | 34.6 | 1  | R.LTPNISEFLTITIGVSGPLTASMIAVAR.C         |
| *              | HsYL1_Ti_104.1959. | 3.137  | 0.2545 | 1637.84 | 1637.885 | 3421.3  | 4                                                          | 376.1  | 61.5 | 2  | R.CFAQPNFKVDGILK.T                       |
| *              | HsFLAG-TIP49b_Ti_  | 3.0792 | 0.1161 | 1481.67 | 1481.738 | 5850.7  | 1                                                          | 876.2  | 68.2 | 6  | K.TVLRDEIIAWHK.K                         |
| *              | HsYL1_Ti_102.2083. | 5.1967 | 0.3385 | 3218.68 | 3218.517 | 6841.8  | 1                                                          | 1329.5 | 35.3 | 4  | K.KTQEDTSSPLSAAGQPENMDSQQLVSLVQK.A       |
| *              | HsYL1_Ti_102.2272. | 3.859  | 0.2281 | 3089.49 | 3090.343 | 3436.8  | 1                                                          | 386.8  | 37.5 | 1  | K.TQEDTSSPLSAAGQPENMDSQQLVSLVQK.A        |
| *              | HsTIP60_Ti_103.253 | 4.5251 | 0.2698 | 3092.11 | 3090.343 | 6209.6  | 1                                                          | 1227.7 | 33   | 2  | K.TQEDTSSPLSAAGQPENMDSQQLVSLVQK.A        |
| *              | HsTIP60_Ti_102.150 | 1.802  | 0.1837 | 862.43  | 863.063  | 5590.6  | 5                                                          | 305.2  | 71.4 | 1  | K.AVTAIMTR.L                             |
| *              | HsTIP60_Ti_105.156 | 4.1919 | 0.3504 | 1430.67 | 1430.56  | 7701.7  | 1                                                          | 1286.9 | 70.8 | 5  | R.LHNLAQFEGGESK.V                        |
| *              | HsYL1_Ti_104.1483. | 4.3241 | 0.2793 | 1432.63 | 1430.56  | 6042.4  | 1                                                          | 1688.6 | 83.3 | 15 | R.LHNLAQFEGGESK.V                        |
| *              | HsH2AZ-FLAG_293_   | 5.9826 | 0.4316 | 1732.05 | 1731.913 | 9603.3  | 1                                                          | 2893.2 | 83.3 | 11 | K.VNTLVAAANSLDNLCR.M                     |
| gij 6678271 re | 14                 | 93     | 46.90% | 414     | 44740    | 6.2     | TAR DNA binding protein [Homo sapiens]                     |        |      |    |                                          |
| *              | HsFLAG-FLJ20729_   | 4.2285 | 0.304  | 3874.51 | 3877.127 | 8121.4  | 1                                                          | 476.7  | 19.3 | 5  | R.VTEDENDEPIEIPSEDDGTVLLSTVTAQFPGACGLR.Y |
| *              | HsFLAG-ARP6_Ti_1   | 3.2284 | 0.3022 | 1311.91 | 1311.468 | 5935.8  | 1                                                          | 807.8  | 77.8 | 2  | R.YRNPV SQCMR.G                          |
| *              | HsFLAG-p53-DNA-D   | 5.1939 | 0.3819 | 2625.1  | 2626.03  | 6592.3  | 1                                                          | 1097.6 | 52.2 | 11 | R.LVEGILHAPDAGWGNLVYVVNYPK.D             |
| *              | HsFLAG-p53-DNA-D   | 4.7349 | 0.2944 | 2625.61 | 2626.03  | 6788.2  | 1                                                          | 889.4  | 31.5 | 18 | R.LVEGILHAPDAGWGNLVYVVNYPK.D             |
| *              | HsFlag-VPS71_Ti_1( | 3.9434 | 0.3012 | 1439.37 | 1438.596 | 7221.3  | 1                                                          | 1303.7 | 75   | 3  | K.RKMDDET DASSAVK.V                      |
| *              | HsFLAG-Lin9_Ti_20% | 2.532  | 0.2638 | 1341.46 | 1342.621 | 8797.2  | 4                                                          | 678.5  | 59.1 | 1  | K.TSDLIVLGLPWK.T                         |
| *              | HsFLAG-FLJ20729_   | 4.3016 | 0.3586 | 1342.45 | 1342.621 | 6825.2  | 1                                                          | 1853.6 | 86.4 | 14 | K.TSDLIVLGLPWK.T                         |
| *              | HsFLAG-ARP6_Ti_1   | 2.6927 | 0.2956 | 1776.45 | 1778.073 | 11051.3 | 1                                                          | 1007   | 57.1 | 1  | K.EYFSTFGEVLMVQVK.K                      |
| *              | HsFLAG-p53-DNA-D   | 4.3542 | 0.3277 | 3704.22 | 3704.083 | 10441.3 | 1                                                          | 978.2  | 25   | 3  | R.CTEDMTEDELREFFS QYGDVMDVFIPK PFR.A     |
| *              | HsFLAG-p53-DNA-D   | 4.2128 | 0.4238 | 2324.34 | 2323.671 | 9117.7  | 1                                                          | 797.9  | 47.2 | 2  | R.EFFS QYGDVMDVFIPK PFR.A                |
| *              | HsFLAG-Lin9_Ti_20% | 5.4766 | 0.503  | 2672.79 | 2673.989 | 8336.3  | 1                                                          | 1692.6 | 54.3 | 5  | R.AFAFVTFADDQIAQSLCGEDLIK.G              |
| *              | HsFLAG-Lin9_Ti_20% | 5.7469 | 0.396  | 2674.47 | 2673.989 | 7562.5  | 1                                                          | 1984.4 | 39.1 | 2  | R.AFAFVTFADDQIAQSLCGEDLIK.G              |
| *              | HsFLAG-Lin9_Ti_20% | 2.9968 | 0.1539 | 1252.39 | 1252.413 | 6833.6  | 1                                                          | 986.1  | 72.7 | 2  | K.GISVHISNAEPK.H                         |
| *              | HsFLAG-FLJ20729_   | 5.0488 | 0.4729 | 1727.21 | 1727.793 | 7964.7  | 1                                                          | 2419.7 | 76.5 | 24 | R.FGGNPGGFGNQGGFGNSR.G                   |
| gij 5174525 re | 84                 | 448    | 46.80% | 2468    | 270618   | 4.8     | microtubule-associated protein 1B isoform 1 [Homo sapiens] |        |      |    |                                          |
| *              | HsFLAG-p53-DNA-D   | 5.3685 | 0.4643 | 2016.99 | 2017.376 | 7045.9  | 1                                                          | 2712.1 | 84.4 | 10 | K.FYLLVVVGEIVTEEHLR.R                    |
| *              | HsFLAG-Lin9_Ti_20% | 3.3219 | 0.1895 | 1212.32 | 1212.438 | 6787.2  | 1                                                          | 1281   | 85   | 2  | R.RAIGNIELGIR.S                          |
| *              | HsFLAG-ARP6_Ti_2   | 5.011  | 0.3406 | 1979.79 | 1979.117 | 5486.9  | 1                                                          | 1144.4 | 70   | 15 | R.SWDTNLI ECNLDQELK.L                    |
| *              | HsFLAG-FLJ20309_   | 4.3453 | 0.2432 | 2372.79 | 2373.62  | 5129.9  | 1                                                          | 577.2  | 47.6 | 6  | R.SDVLETVV LINPSDEAVSTEVR.L              |
| *              | HsFLAG-Lin9_Ti_20% | 4.0338 | 0.2668 | 1653.57 | 1653.795 | 5333.2  | 1                                                          | 1232.6 | 73.1 | 10 | K.ASLTLFCPEEGDWK.N                       |
| *              | HsFLAG-Lin9_Ti_20% | 3.5334 | 0.2856 | 1241.51 | 1242.42  | 5574.1  | 1                                                          | 720.7  | 77.8 | 1  | R.HNLQDFINIK.L                           |
| *              | HsFLAG-p53-DNA-D   | 4.4458 | 0.2406 | 1242.39 | 1242.42  | 8223.1  | 1                                                          | 1650.1 | 88.9 | 12 | R.HNLQDFINIK.L                           |
| *              | HsFLAG-ARP6_Ti_1   | 3.3183 | 0.3072 | 1227.07 | 1227.337 | 8146.1  | 1                                                          | 1775.3 | 94.4 | 2  | K.PCCYIFPGGR.G                           |



|                    |        |        |         |          |         |   |        |      |                                           |
|--------------------|--------|--------|---------|----------|---------|---|--------|------|-------------------------------------------|
| HsFLAG-p53-DNA-D   | 2.7614 | 0.2455 | 2171.83 | 2170.405 | 5510.6  | 5 | 201.6  | 35   | 2 R.GDSALFAVNGFNMLINGGSER.K               |
| HsFLAG-FLJ20729_   | 6.8378 | 0.4055 | 3043.08 | 3044.456 | 10139.5 | 1 | 3087.2 | 42.3 | 1 R.HLDRVDSILLTHIGDDNLPGINSMLQR.K         |
| HsARP6-FLAG_Ti_1   | 4.639  | 0.2798 | 2082.79 | 2082.448 | 6516.8  | 1 | 1239   | 41.7 | 5 K.NLISPDLGVVFLNVPENLK.N                 |
| HsFLAG-p53-DNA-D   | 5.523  | 0.3817 | 2082.83 | 2082.448 | 9023.1  | 1 | 2099.8 | 63.9 | 42 K.NLISPDLGVVFLNVPENLK.N                |
| HsFlag-NUFIP_Ti_2C | 2.5603 | 0.1394 | 1218.55 | 1218.5   | 2899.1  | 1 | 379.3  | 77.8 | 1 K.LSMKPEPLFR.S                          |
| HsFLAG-FLJ20729_   | 4.5887 | 0.3471 | 1531.02 | 1531.792 | 5861.3  | 1 | 1368.5 | 80.8 | 18 R.SVGNTIDPVILFQK.M                     |
| HsFLAG-FLJ20729_   | 4.9787 | 0.3724 | 1678.47 | 1679.089 | 6936.9  | 1 | 1500.8 | 71.4 | 2 K.MGVGKLEMYVLPVK.S                      |
| HsFLAG-Lin9_Ti_20C | 5.4948 | 0.2566 | 3834.54 | 3837.364 | 4682.4  | 1 | 356.9  | 22.8 | 11 K.AEFILPNGQEVDLPISYLTSSSLIVWHPANPAEK.I |
| HsFLAG-ARP6_Ti_1   | 5.0887 | 0.4237 | 2022.71 | 2023.293 | 3499.7  | 1 | 496.8  | 64.7 | 27 R.VLFPGNSTQYNILEGLEK.L                 |
| HsFLAG-FLJ20729_   | 4.7387 | 0.3543 | 2026.24 | 2023.293 | 6424.1  | 1 | 1967.6 | 54.4 | 1 R.VLFPGNSTQYNILEGLEK.L                  |
| HsFLAG-ARP5_Ti_1   | 5.0768 | 0.4177 | 1539.65 | 1539.818 | 9526.9  | 1 | 2067.9 | 83.3 | 2 K.HLDFLKQPLATQK.D                       |
| HsFLAG-ARP6_Ti_2   | 4.0582 | 0.2969 | 1254.88 | 1254.469 | 4154.7  | 4 | 638.7  | 72.7 | 7 K.DLTGQVPTPVVK.Q                        |
| HsFLAG-BC014022_   | 3.4606 | 0.3814 | 1366.47 | 1366.644 | 3988.6  | 1 | 415.9  | 62.5 | 12 R.ESLKPAAKPLPSK.S                      |
| HsFLAG-FLJ20309_   | 3.0856 | 0.2792 | 909.41  | 909.117  | 6948    | 1 | 1311.9 | 93.8 | 2 K.PAAKPLPSK.S                           |
| HsFLAG-Lin9_Ti_20C | 3.0747 | 0.2831 | 1490.64 | 1491.731 | 4820.2  | 1 | 566.3  | 66.7 | 1 K.VNHVEKPPKVESK.E                       |
| HsH2AZ-FLAG_293_   | 3.5248 | 0.1704 | 1491.38 | 1491.731 | 7763.8  | 1 | 1030.6 | 70.8 | 4 K.VNHVEKPPKVESK.E                       |
| HsFLAG-p53-DNA-D   | 3.1615 | 0.321  | 1687.96 | 1687.931 | 6993.1  | 1 | 836.3  | 64.3 | 2 K.DKPVKTETKPSVTEK.E                     |
| HsFLAG-ARP5_Ti_1   | 2.552  | 0.0818 | 1698.72 | 1699.001 | 8003.5  | 8 | 910.4  | 61.5 | 1 K.KEDKTIKKEEKPK.K                       |
| HsFLAG-p53-DNA-D   | 4.8664 | 0.392  | 2627.38 | 2626.044 | 10238.5 | 1 | 1448.9 | 31.7 | 2 K.AAEAVAAAVGTGATTAAVMAAAGIAAIGPAK.E     |
| HsH2AZ-FLAG_293_   | 4.6089 | 0.3125 | 1652.62 | 1652.796 | 5894.8  | 1 | 1445   | 80.8 | 4 K.DFEELKAEVDVTK.D                       |
| HsFLAG-FLJ20729_   | 3.596  | 0.1947 | 1700.44 | 1699.896 | 3823.6  | 1 | 765.1  | 76.9 | 2 K.DIKPQLELIEDEEK.L                      |
| HsFLAG-FLJ20729_   | 3.4095 | 0.2924 | 1940.47 | 1941.229 | 7351.2  | 1 | 771.5  | 56.7 | 1 K.DIKPQLELIEDEEKLK.E                    |
| HsFLAG-p53-DNA-D   | 5.2042 | 0.3593 | 3328.34 | 3328.782 | 5274.7  | 1 | 459.2  | 25.9 | 2 K.DIKPQLELIEDEEKLKETEPVEAYVIQK.E        |
| HsFLAG-Lin9_Ti_20C | 4.2952 | 0.3229 | 1647.4  | 1647.909 | 5261.4  | 1 | 1220.8 | 80.8 | 2 K.LKETEPVEAYVIQK.E                      |
| HsFLAG-FLJ20729_   | 3.3864 | 0.4223 | 1406.18 | 1406.576 | 7510.5  | 1 | 1113.8 | 77.3 | 4 K.ETEPVEAYVIQK.E                        |
| HsFlag-DPCD_Ti_20  | 3.9665 | 0.3213 | 2561.84 | 2562.537 | 7001.9  | 1 | 838    | 30.7 | 4 K.AETEEAEEPEEDGEHVCVSASK.H              |
| HsFLAG-Lin9_Ti_20C | 4.8823 | 0.3374 | 2562.28 | 2562.537 | 5028.3  | 1 | 709.7  | 47.7 | 3 K.AETEEAEEPEEDGEHVCVSASK.H              |
| HsFLAG-ARP5_Ti_1   | 3.7763 | 0.3713 | 2120.48 | 2120.194 | 7306    | 1 | 736.3  | 52.8 | 1 K.HSPTEDEESAKAEADAYIR.E                 |
| HsH2AZ-FLAG_293_   | 6.2651 | 0.4149 | 1941.53 | 1942.089 | 8590.3  | 1 | 2766.9 | 72.2 | 9 K.AAEAGGAEQYGFLLTPTK.Q                  |
| HsFLAG-ARP6_Ti_1   | 2.5727 | 0.1971 | 2743.49 | 2744.854 | 5596.2  | 1 | 365.7  | 34.8 | 1 R.DVMSDETNNETESPSQEFVNITK.Y             |
| HsFLAG-FLJ20729_   | 3.6086 | 0.2158 | 1521.48 | 1519.651 | 4444    | 3 | 453.6  | 57.1 | 2 K.PADVTPPLNGFSEGSK.T                    |
| HsFLAG-FLJ20729_   | 3.7255 | 0.4147 | 2029.73 | 2030.124 | 4882.2  | 1 | 466.4  | 50   | 4 K.DYNASASTISPPSSMEEDK.F                 |
| HsFLAG-ARP6_Ti_1   | 2.3298 | 0.2765 | 971.29  | 972.006  | 6566.3  | 2 | 500.3  | 71.4 | 1 R.DAYCSEVK.A                            |
| HsH2AZ-FLAG_293_   | 2.896  | 0.2825 | 1023.91 | 1023.085 | 4144.6  | 2 | 780.3  | 83.3 | 1 K.DSISAVSSEK.V                          |
| HsFLAG-ARP6_Ti_1   | 3.7948 | 0.2581 | 1423.33 | 1423.606 | 3954    | 2 | 561.3  | 65.4 | 7 K.SPSPSPSPSPLEK.T                       |
| HsFlag-DPCD_Ti_20  | 3.5551 | 0.2551 | 1348.82 | 1349.527 | 7414.7  | 1 | 931.3  | 68.2 | 6 R.SVNFSLTPNEIK.V                        |
| HsFLAG-Lin9_Ti_20C | 3.0333 | 0.2003 | 3125.84 | 3124.305 | 8526.7  | 1 | 406.2  | 28.6 | 2 K.VSAEAEVAPVSPEVTQEVVEHCASPEDK.T        |
| HsFLAG-FLJ20729_   | 3.7743 | 0.2762 | 2965.76 | 2967.172 | 3893.9  | 1 | 524.5  | 30.6 | 2 K.TLEVVSQSQSVTGSAGHTPYQSPTEK.S          |
| HsFLAG-Lin9_Ti_20C | 3.5537 | 0.398  | 2966.99 | 2967.172 | 7785.6  | 1 | 665.5  | 35.2 | 2 K.TLEVVSQSQSVTGSAGHTPYQSPTEK.S          |
| HsFLAG-Lin9_Ti_20C | 4.0493 | 0.4162 | 2711.91 | 2713.059 | 5918.4  | 1 | 782.6  | 43.8 | 1 K.SSHLPTEVIEKPPAVPVSEFSDAK.D            |
| HsFLAG-p53-DNA-D   | 5.5783 | 0.3517 | 2713.42 | 2713.059 | 6263.1  | 1 | 1179.2 | 36.5 | 8 K.SSHLPTEVIEKPPAVPVSEFSDAK.D            |
| HsFLAG-p53-DNA-D   | 6.3277 | 0.3854 | 3355.41 | 3356.67  | 5738.6  | 1 | 988    | 33.6 | 14 K.SSHLPTEVIEKPPAVPVSEFSDAKDENER.A      |
| HsFLAG-FLJ20729_   | 3.5951 | 0.3469 | 2014.41 | 2015.196 | 5917.1  | 1 | 1023.5 | 63.9 | 3 R.ASVSPMDEPVPDESPIEK.V                  |

|                     |        |        |         |          |        |                                                              |        |      |    |                                         |
|---------------------|--------|--------|---------|----------|--------|--------------------------------------------------------------|--------|------|----|-----------------------------------------|
| HsFLAG-ARP6_Ti_1    | 6.3359 | 0.5603 | 2114.21 | 2114.27  | 6926.7 | 1                                                            | 2672.7 | 78.9 | 10 | R.SPPLIGSESAYESFLSADDK.A                |
| HsFLAG-FLJ20729_    | 4.5372 | 0.4386 | 2385.37 | 2385.562 | 7299.9 | 1                                                            | 716    | 45.2 | 3  | K.QGSPDQVSPVSEMTSTSLYQDK.Q              |
| HsFLAG-ARP6_Ti_1    | 4.1967 | 0.3033 | 1714.02 | 1712.854 | 4290.3 | 1                                                            | 593    | 64.3 | 8  | K.STDFAPIKEDFGQEK.K                     |
| HsFLAG-Lin9_Ti_20   | 5.7391 | 0.4916 | 2077.73 | 2077.271 | 9507.4 | 1                                                            | 2511.9 | 72.2 | 1  | K.KTDDVEAMSSQPALALDER.K                 |
| HsFlag-NUFIP_Ti_2C  | 5.4251 | 0.4481 | 2053.62 | 2054.307 | 7265   | 1                                                            | 1620.6 | 66.7 | 9  | R.KLGDVSPQTQIDVVSQFGSFK.E               |
| HsARP6-FLAG_Ti_1    | 3.2424 | 0.2827 | 1345.05 | 1345.507 | 8410.7 | 1                                                            | 1188.2 | 72.7 | 2  | R.DMSLYASLTSEK.V                        |
| HsFLAG-ARP6_Ti_1    | 3.5627 | 0.4124 | 1903.36 | 1904.037 | 4959.5 | 1                                                            | 483.3  | 50   | 3  | R.ESSPLYSPTFSDSTSAVK.E                  |
| HsFLAG-ARP6_Ti_1    | 5.5246 | 0.5094 | 2409.56 | 2410.525 | 5960   | 1                                                            | 1608.6 | 63.6 | 8  | K.TATCHSSSSPPIDAASAEPYGFR.A             |
| HsFLAG-Lin9_Ti_20   | 3.9203 | 0.2804 | 2410.09 | 2410.525 | 7284.5 | 1                                                            | 873.8  | 33   | 2  | K.TATCHSSSSPPIDAASAEPYGFR.A             |
| HsFLAG-ARP6_Ti_1    | 5.4608 | 0.3859 | 1854.52 | 1854.137 | 9232.2 | 1                                                            | 1467.4 | 60   | 11 | R.ASVLFDTMQHHLALNR.D                    |
| HsFlag-NUFIP_Ti_2C  | 4.2141 | 0.3355 | 1854.54 | 1854.137 | 4468.3 | 1                                                            | 904.5  | 48.3 | 2  | R.ASVLFDTMQHHLALNR.D                    |
| HsFLAG-Lin9_Ti_20   | 3.5991 | 0.3274 | 1990.71 | 1991.121 | 7787.5 | 4                                                            | 506    | 46.9 | 4  | K.TPGDFSYAYQKPEETTR.S                   |
| HsFLAG-ARP6_Ti_1    | 3.514  | 0.3117 | 1771.34 | 1769.726 | 5825.6 | 1                                                            | 891.9  | 65.4 | 1  | R.SPDEEDYDYESYEK.T                      |
| HsH2AZ-FLAG_293_    | 4.1042 | 0.3889 | 1491.3  | 1491.551 | 6411.3 | 1                                                            | 1339.1 | 73.1 | 1  | K.SPDSGYSYETIGK.T                       |
| HsH2AZ-FLAG_293_    | 4.6838 | 0.3733 | 1659.23 | 1659.744 | 7634.8 | 1                                                            | 2424.9 | 84.6 | 5  | K.TPEDGDYSYIEIK.T                       |
| HsH2AZ-FLAG_293_    | 4.0645 | 0.2738 | 1575.61 | 1575.626 | 6581.5 | 1                                                            | 1029.1 | 65.4 | 7  | R.TPEEGGYSYDISEK.T                      |
| HsARP6-FLAG_Ti_1    | 3.0615 | 0.3014 | 1546.92 | 1545.643 | 4825.8 | 1                                                            | 296.2  | 53.8 | 3  | K.TTSPPEVSGYSYEK.T                      |
| HsFLAG-Lin9_Ti_20   | 4.7448 | 0.3505 | 3550.94 | 3551.626 | 6983.4 | 1                                                            | 642.8  | 24.2 | 1  | R.RLLDDISNGYDSEDGGHTLGDPSYSYETTEK.I     |
| HsFLAG-FLJ20729_    | 4.6642 | 0.3184 | 3394.65 | 3395.438 | 8982.9 | 1                                                            | 1184.5 | 28.3 | 2  | R.LLDDISNGYDSEDGGHTLGDPSYSYETTEK.I      |
| HsFLAG-p53-DNA-D    | 4.1438 | 0.4795 | 1926.61 | 1927.028 | 4746.1 | 1                                                            | 521.4  | 56.2 | 10 | K.ITSFPESEGYSETSTK.T                    |
| HsARP6-FLAG_Ti_1    | 4.163  | 0.41   | 1666.16 | 1666.702 | 7515.7 | 1                                                            | 1018   | 65.4 | 6  | R.TPDTSTYCYETAEK.I                      |
| HsFLAG-Lin9_Ti_20   | 5.0469 | 0.4827 | 2315.84 | 2316.403 | 6886.8 | 1                                                            | 1514.8 | 63.2 | 6  | R.TPQASTYSYETS DLCYTAEK.K               |
| HsFLAG-Lin9_Ti_20   | 4.0985 | 0.3509 | 1717.75 | 1716.815 | 7407   | 1                                                            | 949.7  | 65.4 | 4  | R.QDVLCLVSSCEYK.H                       |
| HsFLAG-p53-DNA-D    | 5.0889 | 0.3897 | 4449.99 | 4451.844 | 7026.7 | 1                                                            | 654.3  | 22   | 9  | GK.Q                                    |
| HsFLAG-FLJ20729_    | 4.3522 | 0.3714 | 1360.94 | 1361.541 | 4871   | 1                                                            | 872.7  | 67.9 | 14 | K.PLTQSGGAPPPPGGK.Q                     |
| HsFLAG-p53-DNA-D    | 3.3074 | 0.3513 | 1364.7  | 1365.659 | 5675.7 | 1                                                            | 769    | 65.4 | 2  | K.SKPLAASPKPAGLK.E                      |
| HsFLAG-ARP6_Ti_1    | 3.1565 | 0.1671 | 1365.26 | 1365.659 | 4615.2 | 1                                                            | 567.5  | 65.4 | 8  | K.SKPLAASPKPAGLK.E                      |
| HsFLAG-p53-DNA-D    | 2.156  | 0.1947 | 1142.57 | 1143.326 | 6539   | 1                                                            | 661.6  | 65   | 2  | K.AAKPTTTPEVK.A                         |
| HsFLAG-Lin9_Ti_20   | 3.373  | 0.1866 | 2628.81 | 2629.939 | 4234.4 | 2                                                            | 189.3  | 34.8 | 3  | K.SSAVPPGLPVYLDLCYIPNHSNSK.N            |
| HsFLAG-ARP6_Ti_2    | 2.5269 | 0.2611 | 997.56  | 998.123  | 4776.7 | 8                                                            | 489.9  | 78.6 | 1  | K.NVDVEFFK.R                            |
| HsFLAG-ARP6_Ti_2    | 5.2105 | 0.3695 | 1928.26 | 1929.007 | 7609.4 | 1                                                            | 1462.4 | 61.8 | 7  | R.SSYVVSNDPAAEPPSR.A                    |
| HsFLAG-p53-DNA-D    | 2.6195 | 0.214  | 1028.53 | 1029.222 | 9506.2 | 3                                                            | 847.8  | 66.7 | 3  | R.AVLDALLEGK.A                          |
| HsFLAG-Lin9_Ti_20   | 3.5493 | 0.1875 | 1029.31 | 1029.222 | 3853.7 | 2                                                            | 851.4  | 83.3 | 3  | R.AVLDALLEGK.A                          |
| gij 4826760 re      | 13     | 218    | 46.70%  | 415      | 45672  | 5.6 heterogeneous nuclear ribonucleoprotein F [Homo sapiens] |        |      |    |                                         |
| * HsFLAG-ARP6_Ti_1  | 4.7297 | 0.4413 | 3753.46 | 3754.039 | 6288.4 | 1                                                            | 614.2  | 25.8 | 8  | R.GLPWSCSVEDVQNFLSDCTIHDGAAGVHFIYTR.E   |
| * HsFLAG-ARP6_Ti_1  | 3.483  | 0.3329 | 1711.24 | 1710.792 | 6411.3 | 1                                                            | 1279.5 | 70   | 1  | R.QSGEAFVELGSEDDVK.M                    |
| * HsFLAG-TIP49b_Ti_ | 4.1175 | 0.4777 | 1631.59 | 1631.658 | 7476.9 | 1                                                            | 1200.2 | 66.7 | 18 | K.HSGPNSADSANDGFVR.L                    |
| * HsFLAG-Lin9_Ti_20 | 4.0416 | 0.2426 | 3690.84 | 3690.194 | 6680   | 3                                                            | 395.9  | 19.7 | 3  | R.GLPFGCTKEEIVQFFSGLIEIVPNGITLPVDPEGK.I |
| * HsFLAG-Lin9_Ti_20 | 3.4972 | 0.1849 | 2830.73 | 2829.219 | 4755.5 | 1                                                            | 400.9  | 38   | 2  | K.EEIVQFFSGLIEIVPNGITLPVDPEGK.I         |
| * HsFLAG-p53-DNA-D  | 5.6326 | 0.4087 | 1868.52 | 1869.081 | 8614.7 | 1                                                            | 2252.8 | 71.9 | 66 | K.ITGEAFVQFASQELAEK.A                   |
| * HsFLAG-ARP6_Ti_1  | 7.8967 | 0.5084 | 3476.73 | 3476.711 | 8113.5 | 1                                                            | 2105.6 | 33.9 | 15 | R.MRPGAYSTGYGGYEEYSGLSDGYGFTTDLFGR.D    |
| * HsFLAG-ARP6_Ti_1  | 4.0927 | 0.2922 | 2212.98 | 2213.352 | 5498.8 | 1                                                            | 654.5  | 34.7 | 2  | R.YGDSEFTVQSTTGHCVHMR.G                 |
| * HsFLAG-p53-DNA-D  | 4.1657 | 0.3196 | 2212.98 | 2213.352 | 7408.4 | 1                                                            | 1142.4 | 52.8 | 1  | R.YGDSEFTVQSTTGHCVHMR.G                 |

|               |                    |        |        |         |          |         |                                                                   |        |      |    |                                  |
|---------------|--------------------|--------|--------|---------|----------|---------|-------------------------------------------------------------------|--------|------|----|----------------------------------|
|               | HsH2AZ-FLAG_293_   | 5.0454 | 0.3774 | 1997.32 | 1998.202 | 8397.3  | 1                                                                 | 1161   | 59.4 | 53 | K.ATENDIYNFFSPLNPVR.V            |
|               | HsYL1_Ti_102.2959. | 5.4927 | 0.2675 | 1998.86 | 1998.202 | 7998.6  | 1                                                                 | 1939.6 | 48.4 | 8  | K.ATENDIYNFFSPLNPVR.V            |
|               | HsFLAG-TCF3_Ti_10  | 2.9392 | 0.214  | 1092.51 | 1093.228 | 6901.6  | 1                                                                 | 869.9  | 72.2 | 12 | R.VHIEIGPDGR.V                   |
|               | HsFLAG-ARP6_Ti_10  | 3.664  | 0.2731 | 1093.44 | 1093.228 | 6216    | 1                                                                 | 1638.1 | 88.9 | 29 | R.VHIEIGPDGR.V                   |
| gi 5803076 re | 6                  | 23     | 46.50% | 185     | 21418    | 4.9     | chromobox homolog 1 (HP1 beta homolog Drosophila ) [Homo sapiens] |        |      |    |                                  |
| *             | HsFlag-NUFIP_Ti_11 | 2.8199 | 0.1721 | 2238.25 | 2238.45  | 9173.3  | 1                                                                 | 661.3  | 50   | 1  | K.KKVEEVLEEEEEYYVEK.V            |
| *             | HsFlag-NUFIP_Ti_10 | 6.3636 | 0.3429 | 2109.67 | 2110.276 | 8654.2  | 1                                                                 | 2663.5 | 81.2 | 14 | K.KVEEVLEEEEEYYVEK.V             |
| *             | HsFlag-NUFIP_Ti_10 | 4.7123 | 0.3195 | 3428.65 | 3428.567 | 5808.1  | 1                                                                 | 911.8  | 30.4 | 3  | K.GFSDENTWEPEENLDCPDLIAEFLQSQK.T |
|               | HsFlag-NUFIP_Ti_10 | 2.8706 | 0.2148 | 1714.77 | 1714.045 | 8801.6  | 1                                                                 | 611.6  | 53.3 | 1  | R.IIGATDSSGELMFLMK.W             |
| *             | HsFLAG-ARP6_Ti_10  | 2.7166 | 0.1141 | 1159.84 | 1159.238 | 4535.1  | 3                                                                 | 771.3  | 75   | 1  | K.NSDEADLVPK.E                   |
| *             | HsFlag-NUFIP_Ti_11 | 3.8387 | 0.2182 | 1526.95 | 1527.683 | 7167    | 3                                                                 | 909.4  | 68.2 | 3  | K.CPQVVISFYEER.L                 |
| gi 29893564 r | 19                 | 177    | 46.30% | 462     | 51803    | 9.4     | microspherule protein 1 isoform 1 [Homo sapiens]                  |        |      |    |                                  |
| gi 59799166 r | 19                 | 177    | 45.10% | 475     | 53001    | 9.5     | microspherule protein 1 isoform 2 [Homo sapiens]                  |        |      |    |                                  |
|               | HsFLAG-FLJ20309_   | 2.5182 | 0.1378 | 1071.98 | 1073.235 | 4782.8  | 3                                                                 | 585.1  | 75   | 1  | R.ASSQALGTIPK.R                  |
|               | HsFLAG-ARP5_Ti_10  | 3.9839 | 0.2335 | 1609.42 | 1609.817 | 7963    | 1                                                                 | 2144.3 | 80.8 | 2  | R.KKFDELVESSLAK.S                |
|               | HsFLAG-FLJ20309_   | 4.9034 | 0.2927 | 1481.48 | 1481.643 | 7205.5  | 1                                                                 | 2417.8 | 87.5 | 23 | K.KFDELVESSLAK.S                 |
|               | HsFLAG-FLJ20309_   | 4.575  | 0.4613 | 1685.45 | 1685.961 | 4477.1  | 1                                                                 | 675.2  | 61.8 | 12 | K.APSTPVPPSPAPAPGLTK.R           |
|               | HsFLAG-FLJ20309_   | 4.0193 | 0.2719 | 1468.61 | 1468.736 | 7002.8  | 1                                                                 | 1496.4 | 81.8 | 8  | R.WYALLYDPVISK.L                 |
|               | HsFLAG-FLJ20309_   | 2.176  | 0.2192 | 1405.63 | 1406.625 | 2176.9  | 5                                                                 | 131.1  | 58.3 | 1  | R.QLHPEAIAIQSK.A                 |
|               | HsFLAG-FLJ20309_   | 3.4494 | 0.149  | 1406.35 | 1406.625 | 4641.8  | 1                                                                 | 705.2  | 79.2 | 6  | R.QLHPEAIAIQSK.A                 |
|               | HsFLAG-ARP5_Ti_10  | 3.8229 | 0.1925 | 1464.31 | 1464.702 | 6787.4  | 1                                                                 | 944.5  | 66.7 | 2  | K.ALFSKAEQQLSK.V                 |
|               | HsFLAG-FLJ20309_   | 3.8867 | 0.3677 | 2030.67 | 2030.245 | 4702.4  | 1                                                                 | 534.2  | 52.9 | 8  | K.VGSTSQPTLETQDLLHR.H            |
|               | HsFlag-FLJ90652_20 | 3.5833 | 0.2181 | 1226.2  | 1226.482 | 7571.6  | 2                                                                 | 1552.4 | 83.3 | 1  | K.ALQAHWQLMK.Q                   |
|               | HsFLAG-FLJ20309_   | 4.9282 | 0.3104 | 1836.56 | 1836.095 | 9430    | 1                                                                 | 2362.5 | 75   | 10 | K.QYYLLEDQTVQPLPK.G              |
|               | HsFLAG-FLJ20309_   | 5.7663 | 0.5126 | 1982.56 | 1982.065 | 8013.7  | 1                                                                 | 2455.2 | 76.5 | 23 | K.GDQVLNFSDAEDLIDDSK.L           |
|               | HsFLAG-FLJ20309_   | 3.6202 | 0.2103 | 2223.78 | 2223.398 | 4539.8  | 2                                                                 | 565.6  | 35.5 | 1  | K.GDQVLNFSDAEDLIDDSK.L           |
|               | HsFLAG-FLJ20309_   | 5.5876 | 0.3946 | 2224.2  | 2223.398 | 10133.2 | 1                                                                 | 2770.5 | 68.4 | 6  | K.GDQVLNFSDAEDLIDDSK.L           |
|               | HsFLAG-FLJ20309_   | 5.3057 | 0.3546 | 1801.72 | 1800.963 | 10726.9 | 1                                                                 | 2448.8 | 73.3 | 46 | K.DNQIDVDLSLEGPWK.I              |
|               | HsFLAG-FLJ20436_   | 3.5641 | 0.3536 | 1353.77 | 1354.421 | 6100.2  | 1                                                                 | 1355.3 | 81.8 | 7  | K.NNGDFFIANEGR.R                 |
|               | HsFLAG-ARP5_Ti_10  | 2.8426 | 0.281  | 1731.6  | 1732.002 | 4652.9  | 2                                                                 | 363.7  | 50   | 1  | R.RPIYIDGRPVLCGSK.W              |
|               | HsFLAG-FLJ20309_   | 3.8986 | 0.3416 | 1403.39 | 1402.591 | 7117.2  | 1                                                                 | 1227.7 | 79.2 | 12 | R.LSNNSVVEIASLR.F                |
|               | HsFLAG-ARP5_Ti_10  | 5.1799 | 0.413  | 1675.33 | 1676.055 | 6850.2  | 1                                                                 | 1865.4 | 84.6 | 7  | R.FVFLINQDLIALIR.A               |
| gi 4506457 re | 8                  | 31     | 46.10% | 317     | 36876    | 4.4     | reticulocalbin 2, EF-hand calcium binding domain [Homo sapiens]   |        |      |    |                                  |
| *             | HsFLAG-ARP6_Ti_10  | 3.272  | 0.302  | 2266.17 | 2266.357 | 6368.3  | 1                                                                 | 372    | 41.2 | 1  | K.NSDDTVTWDEYNIQMYDR.V           |
| *             | HsFLAG-ARP6_Ti_10  | 4.713  | 0.4343 | 2343.29 | 2344.45  | 8628.7  | 1                                                                 | 1609.7 | 60.5 | 2  | R.VIDFDENTALDDAEEESFRK.L         |
| *             | HsFLAG-ARP6_Ti_10  | 4.3448 | 0.4594 | 1819.25 | 1818.937 | 6037.5  | 1                                                                 | 1355.9 | 70   | 13 | K.NGDGFVSLEEFGLDYR.W             |
| *             | HsFLAG-TCF3_Ti_10  | 4.6957 | 0.4444 | 1943.7  | 1943.12  | 5021.1  | 1                                                                 | 1041.1 | 73.3 | 4  | R.WDPTANEDPEWILVEK.D             |
| *             | HsFLAG-TCF3_Ti_10  | 4.9504 | 0.3123 | 4514.52 | 4513.937 | 9618.7  | 1                                                                 | 622.9  | 20.5 | 2  | K.K                              |
| *             | HsFLAG-Lin9_Ti_20  | 5.7947 | 0.4392 | 2771.09 | 2771.007 | 6512.4  | 1                                                                 | 1131.9 | 52.2 | 1  | K.KLSEEEILENPDLFLTSEATDYGR.Q     |
| *             | HsFLAG-Lin9_Ti_20  | 5.4002 | 0.3769 | 2772.01 | 2771.007 | 11501.2 | 1                                                                 | 1951.3 | 34.8 | 7  | K.KLSEEEILENPDLFLTSEATDYGR.Q     |
| *             | HsFLAG-TCF3_Ti_10  | 2.7604 | 0.1328 | 1595.51 | 1595.665 | 5863.9  | 2                                                                 | 425.4  | 59.1 | 1  | R.QLHDDYFYHDEL.-                 |
| gi 15082258 r | 7                  | 40     | 45.90% | 183     | 20811    | 5.3     | chromobox homolog 3 [Homo sapiens]                                |        |      |    |                                  |
| gi 89038889 r | 7                  | 40     | 45.90% | 183     | 20811    | 5.3     | PREDICTED: similar to chromobox homolog 3 [Homo sapiens]          |        |      |    |                                  |

|                      |        |        |         |          |        |                                                                      |        |      |    |                                      |
|----------------------|--------|--------|---------|----------|--------|----------------------------------------------------------------------|--------|------|----|--------------------------------------|
| gij20544151 r        | 7      | 40     | 45.90%  | 183      | 20811  | 5.3 chromobox homolog 3 [Homo sapiens]                               |        |      |    |                                      |
| HsFlag-NUFIP_Ti_1C   | 4.3125 | 0.3387 | 1662.52 | 1662.834 | 5539.3 | 1                                                                    | 887.7  | 69.2 | 2  | K.KVEEAPEEFVVEK.V                    |
| HsFLAG-p53-DNA-D     | 3.6481 | 0.098  | 3700.25 | 3698.944 | 11792  | 3                                                                    | 730.8  | 22.5 | 1  | K.WKGFTDADNTWEPEENLDCEPELIEAFLNSQK.A |
| HsFlag-NUFIP_Ti_1C   | 5.6695 | 0.4255 | 3383.95 | 3384.557 | 8761.9 | 1                                                                    | 922.7  | 26.8 | 7  | K.GFTDADNTWEPEENLDCEPELIEAFLNSQK.A   |
| HsFlag-NUFIP_Ti_1C   | 2.8706 | 0.2148 | 1714.77 | 1714.045 | 8801.6 | 1                                                                    | 611.6  | 53.3 | 1  | R.IIGATDSSGELMFLMK.W                 |
| HsFLAG-ARP6_Ti_1     | 2.7364 | 0.1325 | 1175.28 | 1176.266 | 7574.1 | 1                                                                    | 930.4  | 70   | 1  | K.DSDEADLVLAKE                       |
| HsFLAG-ARP6_Ti_1     | 4.4268 | 0.2221 | 1176.19 | 1176.266 | 5715.6 | 1                                                                    | 1346.9 | 85   | 2  | K.DSDEADLVLAKE                       |
| HsFlag-NUFIP_Ti_1C   | 4.4119 | 0.1679 | 1525.57 | 1525.711 | 7777.5 | 1                                                                    | 1543.6 | 77.3 | 26 | K.CPQIVIAFYEER.L                     |
| gij11136628 r        | 7      | 27     | 45.80%  | 225      | 24764  | 4.7 eukaryotic translation elongation factor 1 beta 2 [Homo sapiens] |        |      |    |                                      |
| gij4503477 re        | 7      | 27     | 45.80%  | 225      | 24764  | 4.7 eukaryotic translation elongation factor 1 beta 2 [Homo sapiens] |        |      |    |                                      |
| HsFLAG-ARP6_Ti_1     | 5.5752 | 0.3747 | 1606.11 | 1604.8   | 6601.3 | 1                                                                    | 2138.9 | 85.7 | 14 | K.SPAGLQVLNDYLADK.S                  |
| HsFLAG-TCF3_Ti_1     | 3.8814 | 0.272  | 3446.61 | 3447.792 | 4222.8 | 2                                                                    | 233.2  | 21   | 1  | K.SYIEGYVPSQADVAVFEAVSSPPPADLCHALR.W |
| HsFLAG-FLJ20309_     | 2.2092 | 0.0972 | 726.49  | 726.938  | 3544.8 | 2                                                                    | 369.7  | 75   | 6  | K.KPALVAK.S                          |
| HsFlag-VPS71_Ti_1C   | 5.4857 | 0.1175 | 2851.62 | 2851.164 | 5465.8 | 1                                                                    | 1362.4 | 41.3 | 2  | K.SSILLDVKPWDEETDMAKLEECVR.S         |
| HsFlag-VPS71_Ti_1C   | 2.7007 | 0.3733 | 1347.71 | 1348.498 | 5679.8 | 1                                                                    | 386.5  | 50   | 1  | R.SIQADGLVWGSSK.L                    |
| HsARP6-FLAG_Ti_1     | 3.1041 | 0.1913 | 1475.33 | 1475.648 | 7720.8 | 1                                                                    | 1139.3 | 77.3 | 1  | K.KLQIQCVVEDDK.V                     |
| HsFlag-VPS71_Ti_1C   | 3.6688 | 0.1914 | 1348.34 | 1347.474 | 4763.4 | 1                                                                    | 872.7  | 80   | 2  | K.LQIQCVVEDDK.V                      |
| gij4503571 re        | 13     | 106    | 45.60%  | 434      | 47169  | 7.4 enolase 1 [Homo sapiens]                                         |        |      |    |                                      |
| * HsH2AZ-FLAG_293_   | 3.8993 | 0.276  | 1407.24 | 1407.563 | 5406.7 | 1                                                                    | 1113.4 | 79.2 | 3  | R.GNPTVEVDLFTSK.G                    |
| HsH2AZ-FLAG_293_     | 5.1206 | 0.3787 | 1805.83 | 1806.026 | 3207.6 | 1                                                                    | 636.4  | 67.6 | 5  | R.AAVPSGASTGIYEALER.D                |
| * HsFLAG-p53-DNA-D   | 2.7268 | 0.1623 | 1089.53 | 1089.234 | 6500.6 | 9                                                                    | 732.9  | 75   | 2  | K.KLNVTEQEK.I                        |
| * HsFLAG-ARP6_Ti_1   | 6.1831 | 0.3129 | 3014.14 | 3013.383 | 8871.3 | 1                                                                    | 1922.7 | 33.6 | 16 | R.HIADLAGNSEVILPVPFNVINGGSHAGNK.L    |
| * HsFlag-VPS71_Ti_1C | 4.1844 | 0.3069 | 1910.94 | 1909.315 | 5108.3 | 1                                                                    | 716.1  | 59.4 | 3  | K.LAMQEFMILPVGAAFR.E                 |
| * HsFLAG-FLJ20729_   | 3.5655 | 0.1616 | 1144.44 | 1144.316 | 6413.2 | 3                                                                    | 1022.5 | 77.8 | 10 | R.IGAEVYHNLK.N                       |
| * HsH2AZ-FLAG_293_   | 4.9245 | 0.3956 | 1962.29 | 1962.08  | 6759.2 | 1                                                                    | 1478.1 | 63.9 | 4  | K.DATNVGDEGGFAPNILENK.E              |
| * HsFLAG-ARP6_Ti_1   | 2.9894 | 0.3155 | 1541.55 | 1541.805 | 9914.9 | 1                                                                    | 1245.1 | 65.4 | 1  | K.VVIGMDVAASEFFR.S                   |
| * HsFlag-VPS71_Ti_1C | 1.9685 | 0.133  | 1072.58 | 1073.191 | 5674.4 | 6                                                                    | 440.9  | 56.2 | 1  | R.SGKYDLDFK.S                        |
| * HsH2AZ-FLAG_293_   | 4.633  | 0.3402 | 1426.21 | 1426.609 | 4420.2 | 1                                                                    | 1058   | 86.4 | 14 | R.YISPDQLADLYK.S                     |
| * HsFLAG-p53-DNA-D   | 6.4829 | 0.2642 | 2989.06 | 2987.251 | 8646.9 | 1                                                                    | 2274.7 | 39.6 | 6  | K.SFIKDYPVVSIEDPFQDDWGAWQK.F         |
| * HsFLAG-ARP6_Ti_1   | 5.8762 | 0.2101 | 2511.99 | 2511.663 | 5110.1 | 1                                                                    | 1038.4 | 57.5 | 15 | K.DYPVVSIEDPFQDDWGAWQK.F             |
| HsH2AZ-FLAG_293_     | 5.0674 | 0.403  | 2354.25 | 2354.582 | 6671.8 | 1                                                                    | 1036.5 | 50   | 26 | R.SGETEDTFIADLVVGLCTGQIK.T           |
| gij11321585 r        | 10     | 27     | 45.30%  | 340      | 37377  | 6 guanine nucleotide-binding protein, beta-1 subunit [Homo sapiens]  |        |      |    |                                      |
| * HsFLAG-ARP6_Ti_1   | 5.9829 | 0.4082 | 2016.43 | 2017.169 | 8719.1 | 1                                                                    | 2264.4 | 69.4 | 2  | K.ACADATLSQITNNIDPVGR.I              |
| HsFLAG-ARP6_Ti_1     | 3.6129 | 0.315  | 1338.83 | 1337.496 | 4764.8 | 1                                                                    | 1256   | 90   | 1  | K.IYAMHWGTDSCR.L                     |
| HsFLAG-ARP6_Ti_1     | 2.4153 | 0.3245 | 1017.38 | 1018.155 | 4835   | 1                                                                    | 383.5  | 61.1 | 1  | R.LLVASASQDGK.L                      |
| HsFLAG-ARP6_Ti_1     | 3.3869 | 0.1904 | 1354.3  | 1354.546 | 5425.3 | 1                                                                    | 892.9  | 80   | 3  | K.LIIWDSYTTNK.V                      |
| HsFLAG-ARP6_Ti_1     | 2.2605 | 0.1278 | 805.5   | 805.999  | 5457.6 | 1                                                                    | 635.6  | 83.3 | 1  | K.VHAIPLR.S                          |
| * HsFLAG-ARP6_Ti_1   | 3.2814 | 0.4156 | 1524.58 | 1524.606 | 6240.9 | 2                                                                    | 617.9  | 62.5 | 2  | R.ELAGHTGYLSCCR.F                    |
| * HsFLAG-ARP6_Ti_1   | 5.7665 | 0.3889 | 3522.89 | 3523.642 | 9188.7 | 1                                                                    | 1039.3 | 26.6 | 3  | R.QTFTGHESDINAICFFPNGNAFATGSDDATCR.L |
| * HsFLAG-ARP6_Ti_1   | 5.1731 | 0.4949 | 2127.28 | 2128.355 | 7676.1 | 1                                                                    | 2921.4 | 76.5 | 8  | R.LLLAGYDDFNCNVWDALK.A               |
| HsFLAG-ARP6_Ti_1     | 2.9143 | 0.2593 | 1010.1  | 1010.098 | 5766.2 | 1                                                                    | 890.7  | 83.3 | 3  | R.AGVLAGHDNR.V                       |
| HsFLAG-ARP6_Ti_1     | 5.2606 | 0.5327 | 2416.35 | 2417.659 | 6569.6 | 1                                                                    | 1462.5 | 61.4 | 3  | R.VSCLGVTDGMAVATGSWDSFLK.I           |
| gij20357529 r        | 10     | 19     | 45.30%  | 340      | 37331  | 6 guanine nucleotide-binding protein, beta-2 subunit [Homo sapiens]  |        |      |    |                                      |

|                |                    |        |        |         |          |                                                          |   |        |      |    |                                      |
|----------------|--------------------|--------|--------|---------|----------|----------------------------------------------------------|---|--------|------|----|--------------------------------------|
| *              | HsFLAG-ARP6_Ti_1   | 5.0372 | 0.4292 | 1933.91 | 1933.092 | 8986.4                                                   | 1 | 1982.7 | 66.7 | 2  | K.ACGDSTLTQITAGLDPVGR.I              |
|                | HsFLAG-ARP6_Ti_1   | 3.6129 | 0.315  | 1338.83 | 1337.496 | 4764.8                                                   | 1 | 1256   | 90   | 1  | K.IYAMHWGTDSR.L                      |
|                | HsFLAG-ARP6_Ti_1   | 2.4153 | 0.3245 | 1017.38 | 1018.155 | 4835                                                     | 1 | 383.5  | 61.1 | 1  | R.LLVASQDGK.L                        |
|                | HsFLAG-ARP6_Ti_1   | 3.3869 | 0.1904 | 1354.3  | 1354.546 | 5425.3                                                   | 1 | 892.9  | 80   | 3  | K.LIIWDSYTTNK.V                      |
|                | HsFLAG-ARP6_Ti_1   | 2.2605 | 0.1278 | 805.5   | 805.999  | 5457.6                                                   | 1 | 635.6  | 83.3 | 1  | K.VHAIPLR.S                          |
|                | HsFLAG-ARP6_Ti_1   | 2.5532 | 0.1303 | 1549.49 | 1550.644 | 3866.5                                                   | 1 | 385    | 70.8 | 1  | R.ELPGHTGYLSCCR.F                    |
| *              | HsFLAG-ARP6_Ti_1   | 5.8125 | 0.4161 | 3511.32 | 3511.708 | 7030.5                                                   | 1 | 1115.5 | 30.6 | 2  | R.QTFIGHESDINAVAFFPNGYAFTTGSDDATCR.L |
| *              | HsFLAG-ARP6_Ti_1   | 4.8884 | 0.518  | 2159.36 | 2160.415 | 8200.4                                                   | 1 | 2102.4 | 70.6 | 2  | R.LLLAGYDDFNCNIWDAMK.G               |
|                | HsFLAG-ARP6_Ti_1   | 2.9143 | 0.2593 | 1010.1  | 1010.098 | 5766.2                                                   | 1 | 890.7  | 83.3 | 3  | R.AGVLAGHDNR.V                       |
|                | HsFLAG-ARP6_Ti_1   | 5.2606 | 0.5327 | 2416.35 | 2417.659 | 6569.6                                                   | 1 | 1462.5 | 61.4 | 3  | R.VSCLGVTDDGMAVATGSWDSFLK.I          |
| gij 24234688 r | 24                 | 121    | 45.20% | 679     | 73681    | 6.2 heat shock 70kDa protein 9B precursor [Homo sapiens] |   |        |      |    |                                      |
| *              | HsFLAG-ARP6_Ti_1   | 2.5022 | 0.1468 | 2080.03 | 2079.339 | 9689.8                                                   | 4 | 447.7  | 37.5 | 1  | K.GAVVGIDLGTNSCVAVMEGK.Q             |
| *              | HsFlag-FLJ20643_Ti | 2.854  | 0.1629 | 959.51  | 959.047  | 4139                                                     | 1 | 773.3  | 87.5 | 2  | K.VLENAEGAR.T                        |
| *              | HsFLAG-ARP6_Ti_1   | 3.586  | 0.4219 | 1450.81 | 1451.576 | 4733.8                                                   | 1 | 727.6  | 69.2 | 1  | R.TTPSVVAFTADGER.L                   |
| *              | HsFLAG-ARP6_Ti_1   | 2.0004 | 0.1418 | 715.24  | 715.929  | 3971.5                                                   | 5 | 468.9  | 83.3 | 1  | R.LVGMMPAK.R                         |
| *              | HsFLAG-Lin9_Ti_20  | 5.169  | 0.4443 | 1725.19 | 1725.902 | 10197                                                    | 1 | 1920.1 | 71.4 | 18 | K.RQAVTNPNTFYATK.R                   |
| *              | HsFLAG-ARP6_Ti_1   | 3.4882 | 0.3361 | 1343.74 | 1342.411 | 7164.5                                                   | 1 | 1215.6 | 75   | 2  | R.ASNGDAWVEAHGK.L                    |
| *              | HsFLAG-p53-DNA-D   | 3.6127 | 0.2506 | 1554.02 | 1554.888 | 6032.2                                                   | 1 | 1303.8 | 76.9 | 6  | K.LYSPSQIGAFVLMK.M                   |
| *              | HsFLAG-p53-DNA-D   | 3.3963 | 0.3433 | 1593.21 | 1593.795 | 10112.2                                                  | 1 | 1645.9 | 73.1 | 1  | K.MKETAENYLGHTAK.N                   |
| *              | HsFLAG-ARP6_Ti_1   | 3.7642 | 0.3853 | 1334.4  | 1334.428 | 6980.1                                                   | 1 | 689.1  | 68.2 | 2  | K.ETAENYLGHTAK.N                     |
|                | HsFLAG-KIAA0515_   | 2.6001 | 0.1788 | 1695.38 | 1695.872 | 3084.9                                                   | 3 | 390.6  | 60.7 | 2  | K.NAVITVPAYFNDSQR.Q                  |
| *              | HsFLAG-ARP6_Ti_1   | 4.0951 | 0.2386 | 1243.38 | 1243.406 | 5380.5                                                   | 6 | 1153.8 | 81.8 | 4  | K.DAGQISGLNVLR.V                     |
| *              | HsFLAG-ARP6_Ti_1   | 6.7269 | 0.5222 | 2252.33 | 2252.613 | 7224.4                                                   | 1 | 2613.4 | 72.5 | 19 | K.VIAVYDLGGGTFDISILEIQK.G            |
| *              | HsFLAG-ARP6_Ti_1   | 5.4052 | 0.5142 | 2055.7  | 2057.181 | 4929.5                                                   | 1 | 1284   | 69.4 | 22 | K.STNGDTFLGGEDFDQALLR.H              |
| *              | HsFLAG-ARP6_Ti_1   | 2.9896 | 0.1161 | 1019.18 | 1019.143 | 4429.4                                                   | 1 | 953.2  | 100  | 1  | K.RETGVDLTK.D                        |
| *              | HsFLAG-ARP6_Ti_1   | 4.6388 | 0.3364 | 1363.52 | 1362.569 | 6648.5                                                   | 1 | 1716.7 | 86.4 | 8  | R.AQFEGIVTDLIR.R                     |
| *              | HsFLAG-ARP6_Ti_1   | 4.4673 | 0.4029 | 1447.99 | 1447.69  | 6126.9                                                   | 1 | 1532.4 | 76.9 | 1  | K.SDIGEVILVGMTR.M                    |
| *              | HsFLAG-ARP8_Ti_2   | 2.5246 | 0.0896 | 1291.62 | 1291.45  | 5008.9                                                   | 6 | 319.6  | 60   | 1  | K.VQQTVQDLFGR.A                      |
| *              | HsFLAG-ARP6_Ti_1   | 3.9853 | 0.2574 | 1292.47 | 1291.45  | 8046.7                                                   | 1 | 1566.2 | 85   | 7  | K.VQQTVQDLFGR.A                      |
| *              | HsFLAG-ARP6_Ti_1   | 3.9634 | 0.4456 | 1673.6  | 1674.897 | 8459                                                     | 1 | 1611.7 | 71.4 | 1  | K.VQQTVQDLFGRAPSK.A                  |
| *              | HsFlag-NUFIP_Ti_11 | 3.9151 | 0.2937 | 1594.39 | 1593.953 | 5050.9                                                   | 1 | 933.3  | 71.4 | 13 | K.LLGQFTLIGIPPAPR.G                  |
| *              | HsFLAG-ARP8_Ti_2   | 4.9593 | 0.4288 | 2420.1  | 2419.709 | 12274.9                                                  | 1 | 2353.6 | 59.5 | 4  | R.EQQIVIQSSGGLSKDDIENMVK.N           |
| *              | HsFLAG-ARP6_Ti_1   | 5.9711 | 0.2458 | 2144.28 | 2143.376 | 8816                                                     | 1 | 2454.2 | 48.6 | 2  | K.ERVEAVNMAEGIIHDTETK.M              |
| *              | HsFLAG-ARP6_Ti_1   | 4.3902 | 0.3586 | 1855.21 | 1854.992 | 5676.4                                                   | 1 | 1541.9 | 82.1 | 1  | K.MEEFKDQLPADECNK.L                  |
| *              | HsFLAG-KIAA0515_   | 3.2296 | 0.294  | 1232.55 | 1232.379 | 4553.1                                                   | 1 | 595.3  | 77.3 | 1  | R.QAASSLQQASLK.L                     |
| gij 40254869 r | 20                 | 187    | 45.10% | 499     | 55442    | 5.8 pre-mRNA processing factor 31 homolog [Homo sapiens] |   |        |      |    |                                      |
| *              | HsARP6-FLAG_Ti_1   | 4.7305 | 0.4015 | 1608.27 | 1606.791 | 5402.7                                                   | 1 | 954    | 67.9 | 4  | K.ASEVMGPVEAAPEYR.V                  |
| *              | HsFLAG-TCF3_Ti_1   | 2.9148 | 0.0861 | 2391.82 | 2391.727 | 9391.3                                                   | 4 | 461.8  | 35   | 1  | R.VIVDANNLTVEIENELNIIHK.F            |
| *              | HsH2AZ-FLAG_293_   | 4.1427 | 0.1359 | 2392.48 | 2391.727 | 3203.8                                                   | 1 | 607    | 38.8 | 5  | R.VIVDANNLTVEIENELNIIHK.F            |
| *              | HsARP6-FLAG_Ti_1   | 3.9775 | 0.2119 | 2032.79 | 2033.335 | 5179.4                                                   | 2 | 1048.9 | 45.3 | 5  | K.RFPELESVPNALDYIR.T                 |
| *              | HsFlag-DPCD_Ti_20  | 5.149  | 0.4152 | 2032.92 | 2033.335 | 6485.2                                                   | 1 | 1007.7 | 65.6 | 43 | K.RFPELESVPNALDYIR.T                 |
| *              | HsFLAG-p53-DNA-D   | 4.2878 | 0.2978 | 1876.71 | 1877.147 | 5013.7                                                   | 1 | 601.5  | 60   | 5  | R.FPELESVPNALDYIR.T                  |
| *              | HsFlag-VPS71_Ti_1  | 4.9452 | 0.3502 | 1907.65 | 1906.291 | 3941                                                     | 1 | 1185.8 | 69.4 | 23 | R.MSFIAPNLIIIGASTAAK.I               |

|                |                    |        |        |         |          |        |                                                                              |        |      |    |                                      |
|----------------|--------------------|--------|--------|---------|----------|--------|------------------------------------------------------------------------------|--------|------|----|--------------------------------------|
| *              | HsARP6-FLAG_Ti_1   | 4.039  | 0.273  | 1261.3  | 1261.522 | 4778.3 | 1                                                                            | 1251.2 | 87.5 | 4  | K.IMGVAGGLTNLSK.M                    |
| *              | HsFlag-VPS71_Ti_1  | 3.2213 | 0.2649 | 1261.59 | 1261.522 | 5207.3 | 1                                                                            | 511.9  | 62.5 | 2  | K.IMGVAGGLTNLSK.M                    |
| *              | HsFLAG-ARP6_Ti_1   | 4.5993 | 0.2925 | 1477.15 | 1475.774 | 8107.5 | 1                                                                            | 1499.3 | 79.2 | 14 | K.MPACNIMLLGAQR.K                    |
| *              | HsFLAG-p53-DNA-D   | 6.3496 | 0.5013 | 3517.03 | 3517.963 | 7508.5 | 1                                                                            | 1945.9 | 35.5 | 2  | R.KTLSGFSSTSVPHTGYIYHSDIVQSLPPDLR.R  |
| *              | HsFlag-NUFIP_Ti_11 | 5.8024 | 0.4572 | 3390.86 | 3389.789 | 7359.1 | 1                                                                            | 1358.6 | 30.8 | 17 | K.TLSGFSSTSVPHTGYIYHSDIVQSLPPDLR.R   |
| *              | HsFLAG-FLJ20309_   | 3.7653 | 0.3766 | 1235.34 | 1236.28  | 7977.6 | 1                                                                            | 1251.3 | 85   | 5  | R.VDSFHSTEGK.V                       |
| *              | HsFlag-VPS71_Ti_1  | 3.2198 | 0.2843 | 1352.62 | 1351.499 | 5984   | 1                                                                            | 1176.6 | 85   | 7  | K.VGYELKDEIER.K                      |
| *              | HsH2AZ-FLAG_293_   | 2.8463 | 0.1031 | 1419.46 | 1419.667 | 3852.5 | 1                                                                            | 451    | 70.8 | 5  | K.QVKPLPAPLDGQR.K                    |
| *              | HsFlag-VPS71_Ti_1  | 3.2333 | 0.3466 | 2673.46 | 2673.91  | 7346.6 | 1                                                                            | 762.6  | 41.3 | 1  | R.MSFGEIEEDAYQEDLGFSLGHLGK.S         |
| *              | HsFlag-VPS71_Ti_1  | 5.5543 | 0.4441 | 2675.82 | 2673.91  | 6516.6 | 1                                                                            | 1036.6 | 34.8 | 8  | R.MSFGEIEEDAYQEDLGFSLGHLGK.S         |
| *              | HsH2AZ-FLAG_293_   | 5.5968 | 0.4423 | 2602.26 | 2603.889 | 5449.2 | 1                                                                            | 643.1  | 42   | 29 | R.SSGTASSVAFTPLQGLEIVNPQAAEK.K       |
| *              | HsFLAG-FLJ20729_   | 3.8886 | 0.2242 | 2604.93 | 2603.889 | 8265.3 | 1                                                                            | 738.6  | 26   | 3  | R.SSGTASSVAFTPLQGLEIVNPQAAEK.K       |
| *              | HsARP6-FLAG_Ti_1   | 2.9447 | 0.2946 | 1224.06 | 1223.429 | 3547   | 1                                                                            | 503.8  | 77.8 | 4  | K.YFSSMAEFLK.V                       |
| gij 5174715 re | 15                 | 191    | 45.10% | 364     | 40594    | 6.5    | transcription factor-like 1 [Homo sapiens]                                   |        |      |    |                                      |
| *              | HsYL1_Ti_104.0870. | 2.1724 | 0.2336 | 1116.59 | 1117.247 | 3684.9 | 1                                                                            | 363.5  | 60   | 3  | R.KVNTPAGSSQK.A                      |
| *              | HsYL1_Ti_104.0862. | 2.8467 | 0.2797 | 1117.72 | 1117.247 | 5252.2 | 1                                                                            | 1062.8 | 85   | 4  | R.KVNTPAGSSQK.A                      |
| *              | HsH2AZ-FLAG_293_   | 4.4291 | 0.3799 | 1629.46 | 1629.764 | 4427.5 | 1                                                                            | 1447   | 85.7 | 9  | K.ALLPLELQDDGSDSR.K                  |
| *              | HsYL1-FLAG_Ti_20E  | 4.1512 | 0.2883 | 1757.39 | 1757.938 | 6083.4 | 1                                                                            | 881.1  | 66.7 | 58 | K.ALLPLELQDDGSDSRK.S                 |
| *              | HsH2AZ-FLAG_293_   | 3.3366 | 0.2365 | 1963.53 | 1964.198 | 8343.1 | 1                                                                            | 780.5  | 53.3 | 5  | R.KGPHCERPLTQEELLR.E                 |
| *              | HsFLAG-TIP49b_Ti_  | 3.5891 | 0.2328 | 1834.72 | 1836.024 | 8614.5 | 1                                                                            | 855.8  | 57.1 | 17 | K.GPHCERPLTQEELLR.E                  |
| *              | HsFLAG-TIP49b_Ti_  | 2.0681 | 0.1344 | 987.47  | 988.129  | 4962.3 | 1                                                                            | 419.3  | 78.6 | 2  | K.ITEELNLR.S                         |
| *              | HsFlag-VPS71_Ti_1  | 2.8918 | 0.1242 | 988.38  | 988.129  | 3862.7 | 6                                                                            | 756.8  | 92.9 | 1  | K.ITEELNLR.S                         |
| *              | HsYL1_Ti_105.1550. | 3.9006 | 0.2837 | 1456.11 | 1454.577 | 6549.2 | 2                                                                            | 905.7  | 68.2 | 34 | R.SLETYERLEADK.K                     |
| *              | HsYL1_Ti_106.2318. | 4.4467 | 0.3951 | 2320.06 | 2319.672 | 8663.9 | 1                                                                            | 1228.3 | 52.4 | 7  | K.CPGPIITYHSVTVPLVGPPEPK.E           |
| *              | HsYL1-FLAG_Ti_20E  | 5.8213 | 0.395  | 3209.45 | 3209.497 | 6102.4 | 1                                                                            | 866.8  | 29   | 6  | K.EENVDIGLDPAPSVSALTPHAGTGPVNPAPAR.C |
| *              | HsH2AZ-FLAG_293_   | 4.2636 | 0.3113 | 2618.15 | 2617.877 | 6042.8 | 1                                                                            | 701.9  | 42.9 | 30 | R.TFITFSDDATFEWFPPQGRPPK.V           |
| *              | HsFlag-VPS71_Ti_1  | 2.5301 | 0.2421 | 1598.69 | 1598.811 | 6906.4 | 3                                                                            | 385.8  | 54.2 | 1  | R.EVCPVTHRPAlyR.D                    |
| *              | HsH2AZ-FLAG_293_   | 3.8529 | 0.233  | 1920.42 | 1920.175 | 4272.3 | 4                                                                            | 396.5  | 50   | 3  | R.PALYRDPVTDIPYATAR.A                |
| *              | HsH2AZ-FLAG_293_   | 3.7285 | 0.3053 | 1319.37 | 1319.457 | 4110.8 | 1                                                                            | 1012.3 | 81.8 | 11 | R.DPVTDIPYATAR.A                     |
| gij 16507237 r | 27                 | 218    | 44.80% | 654     | 72333    | 5.2    | heat shock 70kDa protein 5 (glucose-regulated protein, 78kDa) [Homo sapiens] |        |      |    |                                      |
|                | HsFlag-FLJ90652_2E | 4.2425 | 0.3965 | 1568.34 | 1567.739 | 5067.9 | 1                                                                            | 1159.1 | 80.8 | 12 | R.ITPSYVAFTPEGER.L                   |
|                | HsFLAG-ARP6_Ti_1   | 4.4719 | 0.4248 | 1678.88 | 1678.796 | 5407.6 | 1                                                                            | 1303.3 | 78.6 | 14 | K.NQLTSNPENTVFDAK.R                  |
|                | HsFLAG-ARP6_Ti_1   | 3.7141 | 0.2789 | 1431.43 | 1431.545 | 4991.3 | 1                                                                            | 1246.9 | 86.4 | 3  | R.TWNDPVQDDIK.F                      |
|                | HsFLAG-ARP6_Ti_1   | 3.637  | 0.2894 | 1605.62 | 1605.831 | 5433.8 | 1                                                                            | 1357.9 | 78.6 | 2  | K.TKPYIQVDIGGGQTK.T                  |
|                | HsFlag-FLJ90652_2E | 4.4201 | 0.3183 | 1537.4  | 1537.811 | 5511.5 | 1                                                                            | 1734.4 | 88.5 | 10 | K.TFAPEEISAMVLTK.M                   |
|                | HsFlag-VPS71_Ti_1  | 2.6074 | 0.246  | 1537.5  | 1537.811 | 8170.8 | 1                                                                            | 685.9  | 57.7 | 1  | K.TFAPEEISAMVLTK.M                   |
|                | HsFLAG-ARP6_Ti_1   | 5.1932 | 0.3055 | 2016.36 | 2017.295 | 5163.4 | 1                                                                            | 1099.7 | 64.7 | 7  | K.KVTHAVVTVPAYFNDAQR.Q               |
|                | HsFLAG-ARP6_Ti_1   | 4.9662 | 0.4247 | 1889.59 | 1889.121 | 4433.6 | 1                                                                            | 1301.9 | 78.1 | 15 | K.VTHAVVTVPAYFNDAQR.Q                |
|                | HsFLAG-ARP6_Ti_1   | 4.3982 | 0.3629 | 1889.9  | 1889.121 | 5678.5 | 1                                                                            | 1054.9 | 46.9 | 2  | K.VTHAVVTVPAYFNDAQR.Q                |
|                | HsFLAG-ARP6_Ti_1   | 3.222  | 0.359  | 1218.78 | 1218.414 | 5732.6 | 1                                                                            | 921.3  | 77.3 | 1  | K.DAGTIAGLNVMR.I                     |
|                | HsFLAG-Lin9_Ti_20  | 5.2508 | 0.4465 | 1660.49 | 1660.908 | 5331.5 | 1                                                                            | 1768.4 | 80   | 50 | R.IINEPTAAAIAAYGLDK.R                |
|                | HsYL1_Ti_103.1894. | 3.7558 | 0.2757 | 1818.9  | 1817.095 | 5057.2 | 1                                                                            | 693.7  | 62.5 | 2  | R.IINEPTAAAIAAYGLDK.R                |
|                | HsFLAG-ARP6_Ti_1   | 2.8047 | 0.0885 | 904.14  | 904.115  | 3584.3 | 4                                                                            | 594.5  | 91.7 | 1  | R.VMEHFIK.L                          |

|               |                    |        |        |         |          |         |                                                                         |        |      |    |                                      |
|---------------|--------------------|--------|--------|---------|----------|---------|-------------------------------------------------------------------------|--------|------|----|--------------------------------------|
|               | HsFLAG-TIP49b_Ti_  | 3.336  | 0.2643 | 1155.12 | 1154.274 | 7185.7  | 1                                                                       | 1004   | 83.3 | 12 | K.RALSSQHQAR.I                       |
|               | HsFLAG-ARP6_Ti_1   | 5.956  | 0.5117 | 2166.48 | 2166.303 | 5976.8  | 1                                                                       | 1719   | 73.5 | 13 | R.IEIESFYEGEDFSETLTR.A               |
|               | HsFLAG-ARP6_Ti_1   | 4.0561 | 0.3206 | 1513.58 | 1513.752 | 6056.3  | 1                                                                       | 1234   | 77.3 | 7  | R.AKFEELNMDLFR.S                     |
|               | HsFLAG-ARP6_Ti_1   | 5.144  | 0.3191 | 1589.59 | 1589.786 | 7954.8  | 1                                                                       | 2844.4 | 82.1 | 9  | K.KSDIDEIVLVGGSTR.I                  |
|               | HsFLAG-p53-DNA-D   | 2.3343 | 0.1163 | 758.44  | 758.893  | 4419.6  | 8                                                                       | 488.1  | 83.3 | 1  | R.NTVVPTK.K                          |
|               | HsTIP60_Ti_103.185 | 5.1489 | 0.4695 | 1837.58 | 1838.024 | 8399.6  | 1                                                                       | 2292.5 | 75   | 12 | K.SQIFSTASDNQPTVTIK.V                |
|               | HsFLAG-p53-DNA-D   | 2.9197 | 0.231  | 1192.48 | 1192.357 | 6882.2  | 1                                                                       | 982.3  | 83.3 | 8  | K.VYEGERPLTK.D                       |
|               | HsFlag-NUFIP_Ti_1C | 5.2239 | 0.4249 | 1935.7  | 1935.19  | 5644.8  | 1                                                                       | 1308.4 | 67.6 | 5  | K.DNHLLGTDFLTGIPPAPR.G               |
|               | HsFLAG-KIAA0515_   | 2.5    | 0.2671 | 1316.25 | 1317.438 | 3617.5  | 1                                                                       | 341.1  | 70   | 1  | R.NELESYAYSLK.N                      |
|               | HsFLAG-ARP6_Ti_1   | 3.646  | 0.1958 | 1316.8  | 1317.438 | 5342.7  | 3                                                                       | 1372.3 | 90   | 5  | R.NELESYAYSLK.N                      |
|               | HsFLAG-ARP6_Ti_1   | 5.5772 | 0.419  | 1976.37 | 1976.106 | 7894.2  | 1                                                                       | 2696   | 86.7 | 6  | K.IEWLESHQDADIEDFK.A                 |
|               | HsFLAG-ARP5_Ti_1   | 3.3458 | 0.1581 | 1655.36 | 1654.988 | 9557.4  | 1                                                                       | 1135.9 | 65.4 | 2  | K.KKELEEIVQPIISK.L                   |
|               | HsFlag-VPS71_Ti_1C | 4.3377 | 0.2314 | 1398.6  | 1398.64  | 5835.4  | 1                                                                       | 1174.4 | 81.8 | 10 | K.ELEEIVQPIISK.L                     |
|               | HsFLAG-ARP6_Ti_1   | 5.6138 | 0.5424 | 2176.25 | 2177.283 | 7709.6  | 1                                                                       | 1500   | 62.5 | 7  | K.LYGSAGPPPTGEEDTAEKDEL.-            |
| gi 34932414 r | 21                 | 225    | 44.80% | 471     | 54232    | 8.9     | non-POU domain containing, octamer-binding [Homo sapiens]               |        |      |    |                                      |
| *             | HsFLAG-FLJ20729_   | 3.331  | 0.3673 | 1860.03 | 1861.12  | 3525.7  | 4                                                                       | 305.1  | 53.3 | 4  | R.LFVGNLPPDITEEEMR.K                 |
| *             | HsFLAG-FLJ20309_   | 3.2046 | 0.1522 | 903.04  | 901.053  | 6357.8  | 3                                                                       | 1107.4 | 92.9 | 2  | K.AGEVFIHK.D                         |
| *             | HsFLAG-p53-DNA-D   | 2.9549 | 0.0838 | 1143.55 | 1144.316 | 6995.6  | 3                                                                       | 924.2  | 72.2 | 1  | K.AGEVFIHKDK.G                       |
| *             | HsFlag-VPS71_Ti_1C | 3.6723 | 0.1269 | 1145.45 | 1144.316 | 7345.2  | 4                                                                       | 1068.2 | 77.8 | 2  | K.AGEVFIHKDK.G                       |
| *             | HsFLAG-p53-DNA-D   | 5.5402 | 0.449  | 1814.22 | 1814.15  | 6446.3  | 1                                                                       | 1722.6 | 76.7 | 10 | R.TLAEIAKVELDNMPLR.G                 |
| *             | HsFLAG-Lin9_Ti_20  | 2.9738 | 0.1979 | 1248.49 | 1249.378 | 5908.7  | 1                                                                       | 470.9  | 70   | 4  | R.FACHSASLTVR.N                      |
| *             | HsFLAG-TIP49b_Ti_  | 3.152  | 0.3121 | 1250.28 | 1249.378 | 6197    | 1                                                                       | 973.5  | 80   | 5  | R.FACHSASLTVR.N                      |
| *             | HsFLAG-Lin9_Ti_20  | 4.7699 | 0.4136 | 2669.74 | 2669.951 | 10218.3 | 1                                                                       | 2360.4 | 38.6 | 14 | R.NLPQYVSNELLEAFSVFGQVER.A           |
| *             | HsFLAG-p53-DNA-D   | 6.0426 | 0.4214 | 2670.13 | 2669.951 | 7234    | 1                                                                       | 1812.9 | 61.4 | 95 | R.NLPQYVSNELLEAFSVFGQVER.A           |
|               | HsFlag-VPS71_Ti_1C | 2.2093 | 0.2393 | 886.64  | 887.024  | 5875.5  | 7                                                                       | 596.8  | 78.6 | 3  | R.AVVIVDDR.G                         |
| *             | HsFlag-VPS71_Ti_1C | 3.3548 | 0.3784 | 1232.55 | 1232.425 | 6513.6  | 1                                                                       | 1416.1 | 81.8 | 15 | K.GIVEFSGKPAAR.K                     |
| *             | HsFlag-NUFIP_Ti_1C | 6.4244 | 0.4098 | 3638.51 | 3638.988 | 8018    | 1                                                                       | 1420.1 | 29.8 | 14 | R.CSEGSFLLTTFPRPVTVEPMDQLDDEEGLPEK.L |
|               | HsFlag-VPS71_Ti_1C | 4.3893 | 0.3752 | 1696.31 | 1696.874 | 3791.7  | 1                                                                       | 805.1  | 80.8 | 10 | R.FAQPGSFYEYAMR.W                    |
| *             | HsFlag-VPS71_Ti_1C | 2.0073 | 0.2284 | 1180.57 | 1181.416 | 5319.3  | 2                                                                       | 367.3  | 62.5 | 1  | R.HEHQVMLMR.Q                        |
| *             | HsFLAG-p53-DNA-D   | 3.1488 | 0.2082 | 1181.62 | 1181.416 | 5071.6  | 1                                                                       | 944.1  | 93.8 | 2  | R.HEHQVMLMR.Q                        |
|               | HsFlag-VPS71_Ti_1C | 4.3042 | 0.3003 | 1541.67 | 1541.722 | 8958.4  | 1                                                                       | 1251.1 | 72.7 | 14 | R.RMEELHNQEVQK.R                     |
|               | HsFlag-VPS71_Ti_1C | 3.4632 | 0.2114 | 1384.7  | 1385.535 | 6737.3  | 1                                                                       | 1568   | 90   | 2  | R.MEELHNQEVQK.R                      |
| *             | HsFlag-VPS71_Ti_1C | 4.3414 | 0.4787 | 1539.72 | 1539.844 | 7170.3  | 1                                                                       | 1644.2 | 75   | 2  | R.MGQMAMGGAMGINNR.G                  |
| *             | HsFLAG-UTX1_Ti_2   | 5.3508 | 0.4734 | 2163.52 | 2164.444 | 6807.2  | 1                                                                       | 1681   | 64.3 | 13 | R.FGQAATMEGIGAIGGTPPAFNR.A           |
| *             | HsFlag-DPCD_Ti_20  | 4.1429 | 0.1642 | 2163.71 | 2164.444 | 9300.8  | 1                                                                       | 1413.7 | 36.9 | 6  | R.FGQAATMEGIGAIGGTPPAFNR.A           |
|               | HsFlag-VPS71_Ti_1C | 2.432  | 0.1594 | 1072.53 | 1073.194 | 3753.9  | 2                                                                       | 502.2  | 65   | 6  | R.AAPGAEFAPNK.R                      |
| gi 4506005 re | 13                 | 117    | 44.60% | 327     | 37187    | 6.2     | protein phosphatase 1, catalytic subunit, beta isoform 1 [Homo sapiens] |        |      |    |                                      |
| gi 46249376 r | 13                 | 117    | 44.60% | 327     | 37187    | 6.2     | protein phosphatase 1, catalytic subunit, beta isoform 1 [Homo sapiens] |        |      |    |                                      |
|               | HsFlag-NUFIP_Ti_1C | 5.6621 | 0.4071 | 2196.86 | 2197.623 | 6879.7  | 1                                                                       | 1530.1 | 63.9 | 15 | K.SREIFLSQPILLELEAPLK.I              |
|               | HsFlag-NUFIP_Ti_1C | 5.5555 | 0.2355 | 2197.28 | 2197.623 | 5469.5  | 1                                                                       | 994    | 41.7 | 8  | K.SREIFLSQPILLELEAPLK.I              |
|               | HsFLAG-UTX1_Ti_2   | 5.8482 | 0.3752 | 1954.5  | 1954.357 | 3528.8  | 1                                                                       | 1020.8 | 78.1 | 26 | R.EIFLSQPILLELEAPLK.I                |
|               | HsFlag-NUFIP_Ti_2C | 3.445  | 0.3008 | 1660.61 | 1661.821 | 8029.2  | 2                                                                       | 924.8  | 65.4 | 1  | K.ICGDIHQYTDLLR.L                    |
|               | HsFLAG-UTX1_Ti_2   | 3.968  | 0.4278 | 2582.94 | 2583.859 | 3345.1  | 1                                                                       | 403.7  | 47.6 | 4  | R.LFEYGGFPPEANYLFLGDYVDR.G           |

|                |                     |        |        |         |          |                                                 |   |        |      |                                |
|----------------|---------------------|--------|--------|---------|----------|-------------------------------------------------|---|--------|------|--------------------------------|
|                | HsFLAG-UTX1_Ti_20   | 3.1849 | 0.2992 | 1553.73 | 1552.818 | 5504.8                                          | 1 | 712.9  | 70.8 | 6 K.QSLETICLLLAYK.I            |
|                | HsFLAG-p53-DNA-D    | 2.758  | 0.1574 | 1441.48 | 1440.728 | 4335.3                                          | 1 | 826.3  | 80   | 1 K.IKYPENFFLLR.G              |
|                | HsFLAG-UTX1_Ti_20   | 3.0584 | 0.3282 | 1199.35 | 1199.395 | 4678.9                                          | 1 | 820    | 93.8 | 2 K.YPENFFLLR.G                |
|                | HsFlag-NUFIP_Ti_1C  | 5.4504 | 0.4606 | 2114.06 | 2115.32  | 6688.8                                          | 1 | 1505.3 | 70.6 | 19 K.TFTDCFNCLPIAAIVDEK.I      |
|                | HsFlag-NUFIP_Ti_1C  | 5.5834 | 0.4263 | 2249.12 | 2249.479 | 7631.2                                          | 1 | 1500.9 | 61.1 | 13 K.IFCCHGGLSPDLQSMQIR.R      |
|                | HsFlag-NUFIP_Ti_1C  | 4.7195 | 0.3543 | 2249.42 | 2249.479 | 8083.2                                          | 1 | 1565.6 | 43.1 | 6 K.IFCCHGGLSPDLQSMQIR.R       |
|                | HsFLAG-p53-DNA-D    | 4.5257 | 0.4111 | 1641.05 | 1640.792 | 7920.9                                          | 1 | 2058   | 80.8 | 15 R.AHQVVEDGYEFFAK.R          |
|                | HsFLAG-Lin9_Ti_20   | 2.5644 | 0.0837 | 1763.29 | 1762.966 | 9270.4                                          | 3 | 604.7  | 50   | 1 K.YQYGGLNSGRPVTPPR.T         |
| gij 7706254 re | 22                  | 112    | 44.40% | 529     | 59578    | 8.9 nucleolar protein NOP5/NOP58 [Homo sapiens] |   |        |      |                                |
| *              | HsFLAG-TIP49a_Ti_   | 2.7325 | 0.1487 | 1245.46 | 1246.449 | 4877.4                                          | 1 | 558    | 66.7 | 2 K.KLQEVDSLWK.E               |
| *              | HsFLAG-TIP49a_Ti_   | 3.6085 | 0.2005 | 1246.86 | 1246.449 | 6973.5                                          | 1 | 1195.8 | 83.3 | 2 K.KLQEVDSLWK.E               |
| *              | HsFLAG-p53-DNA-D    | 5.6134 | 0.5378 | 1914.72 | 1915.168 | 7632.2                                          | 1 | 2560.3 | 79.4 | 26 K.FQDTAEALAAFTALMEGK.I      |
| *              | HsFLAG-TIP49a_Ti_   | 5.1869 | 0.3444 | 1915.16 | 1915.168 | 8296                                            | 1 | 1885.5 | 45.6 | 2 K.FQDTAEALAAFTALMEGK.I       |
| *              | HsFlag-NUFIP_Ti_2C  | 2.9021 | 0.3307 | 1250.94 | 1251.382 | 5124.4                                          | 1 | 699.6  | 77.3 | 4 K.EAHEPLAVADAK.L             |
| *              | HsFLAG-TIP49a_Ti_   | 4.4195 | 0.4093 | 1883.72 | 1883.182 | 5495.4                                          | 1 | 939    | 66.7 | 9 K.LNLSCIHSPVVNELMR.G         |
| *              | HsFLAG-TIP49a_Ti_   | 3.5119 | 0.1412 | 1399.57 | 1399.605 | 5292.5                                          | 4 | 811.7  | 75   | 3 R.SQMDGLIPGVEPR.E            |
| *              | HsFLAG-TIP49a_Ti_   | 4.3009 | 0.4279 | 1647.4  | 1647.914 | 6190                                            | 1 | 1719.4 | 82.1 | 4 R.EMAAMCLGLAHSLSR.Y          |
| *              | HsFLAG-TIP49a_Ti_   | 5.9636 | 0.3005 | 1890.65 | 1890.199 | 6934.4                                          | 1 | 1702.2 | 71.9 | 6 K.VDTMIVQAISSLDDLDK.E        |
| *              | HsFLAG-TIP49a_Ti_   | 4.6796 | 0.2104 | 1891.68 | 1890.199 | 6805.8                                          | 1 | 1420.7 | 46.9 | 2 K.VDTMIVQAISSLDDLDK.E        |
| *              | HsFLAG-TIP49a_Ti_   | 4.0677 | 0.3645 | 1549.52 | 1549.728 | 8834.4                                          | 1 | 1239   | 72.7 | 1 R.EWYGWHFPELGK.I             |
| *              | HsFlag-DPCD_Ti_20   | 2.7029 | 0.1909 | 1584.55 | 1585.792 | 3008.2                                          | 1 | 473.9  | 65.4 | 1 K.LSELLPEEVEAEVK.A           |
| *              | HsFLAG-TIP49a_Ti_   | 3.2585 | 0.3    | 1962.45 | 1960.419 | 5313.7                                          | 1 | 414.7  | 44.4 | 4 R.MMAIAPNVTVMVGELVGAR.L      |
| *              | HsFLAG-TIP49a_Ti_   | 3.3791 | 0.3146 | 1320.59 | 1321.606 | 4991.6                                          | 1 | 893.8  | 75   | 5 R.LIAHAGSLLNLAK.H            |
| *              | HsFlag-NUFIP_Ti_11  | 4.107  | 0.3559 | 1321.72 | 1321.606 | 5778.4                                          | 1 | 1391.8 | 83.3 | 17 R.LIAHAGSLLNLAK.H           |
| *              | HsYL1_Ti_104.1462.  | 3.3755 | 0.2408 | 1324.63 | 1325.508 | 5337                                            | 1 | 844.1  | 66.7 | 6 K.HAASTVQILGAEK.A            |
| *              | HsYL1_Ti_104.1463.  | 3.9694 | 0.3704 | 1326.53 | 1325.508 | 4703                                            | 1 | 1237.1 | 83.3 | 4 K.HAASTVQILGAEK.A            |
| *              | HsFLAG-ARP6_Ti_1    | 4.0626 | 0.3809 | 1734.48 | 1734.993 | 7148.7                                          | 1 | 1709.8 | 73.3 | 4 K.YGLIYHASLVGQTSPK.H         |
| *              | HsFLAG-TIP49a_Ti_   | 4.9649 | 0.3941 | 1837.47 | 1835.896 | 10126.8                                         | 1 | 2200.9 | 71.9 | 3 R.YDAFGEDSSSAMGVENR.A        |
| *              | HsSrcap_Ti_201.074  | 3.0709 | 0.3164 | 1630.61 | 1629.684 | 6877.7                                          | 1 | 703.2  | 57.1 | 1 K.TYDPSGDSTLPTCSK.K          |
| *              | HsFLAG-TIP49b_Ti_   | 4.2822 | 0.3499 | 1860.08 | 1861.059 | 6773.3                                          | 1 | 822.8  | 60.7 | 2 K.RKIEQVDKEDEITEK.K          |
| *              | HsFLAG-TIP49a_Ti_   | 4.5291 | 0.3377 | 1704.33 | 1704.872 | 8463                                            | 1 | 1903.2 | 76.9 | 4 R.KIEQVDKEDEITEK.K           |
| gij 17921989 r | 21                  | 460    | 44.40% | 448     | 49924    | 5.1 tubulin, alpha 1 [Homo sapiens]             |   |        |      |                                |
|                | HsFLAG-p53-DNA-D    | 3.8546 | 0.3066 | 2415.78 | 2416.655 | 9887                                            | 1 | 636.1  | 42.5 | 25 R.QLFHPEQLITGKEDAANNYAR.G   |
|                | HsSrcap_Ti_204.213  | 5.0964 | 0.4219 | 2416.38 | 2416.655 | 6002.3                                          | 1 | 934.1  | 37.5 | 18 R.QLFHPEQLITGKEDAANNYAR.G   |
|                | HsScrap_Ti_106.239  | 2.55   | 0.1652 | 1877.45 | 1876.082 | 6295.5                                          | 1 | 349.4  | 53.6 | 1 R.RNLDIRPTYTNLNR.L           |
|                | HsFlag-ZnF-HIT2_Ti_ | 2.9442 | 0.2517 | 1719.52 | 1719.895 | 6354.4                                          | 3 | 522.7  | 57.7 | 12 R.NLDIRPTYTNLNR.L           |
|                | HsFLAG-ARP6_Ti_1    | 5.0973 | 0.4595 | 1487.62 | 1488.768 | 7314.4                                          | 1 | 1783.7 | 80.8 | 94 R.LISQIVSSITASLR.F          |
|                | HsFLAG-Lin9_Ti_20   | 3.9906 | 0.2202 | 1487.96 | 1488.768 | 5903.2                                          | 1 | 1035.4 | 48.1 | 1 R.LISQIVSSITASLR.F           |
|                | HsFLAG-ARP6_Ti_1    | 5.8116 | 0.4265 | 2410.46 | 2410.689 | 5990.7                                          | 1 | 1327.4 | 60   | 74 R.FDGALNVDLTEFQTNLVPYPR.I   |
|                | HsYL1_Ti_106.2380.  | 4.538  | 0.4145 | 1756.22 | 1758.07  | 4074.6                                          | 1 | 799.2  | 70   | 54 R.IHFPLATYAPVISAIEK.A       |
|                | HsFLAG-ARP6_Ti_1    | 5.1723 | 0.3713 | 2751.88 | 2752.037 | 6388.1                                          | 1 | 727.7  | 32.6 | 7 K.AYHEQLSVAEITNACFEPANQMVK.C |
|                | HsYL1_Ti_103.2152.  | 5.4112 | 0.353  | 2751.97 | 2752.037 | 8492.5                                          | 1 | 1660.1 | 52.2 | 3 K.AYHEQLSVAEITNACFEPANQMVK.C |
|                | HsFLAG-ARP6_Ti_1    | 3.1777 | 0.2663 | 1250.3  | 1250.43  | 4496.7                                          | 1 | 907.7  | 93.8 | 7 K.YMACCLLYR.G                |



|              |                    |        |        |         |          |         |                         |        |      |                                           |
|--------------|--------------------|--------|--------|---------|----------|---------|-------------------------|--------|------|-------------------------------------------|
|              | HsSrcap_Ti_202.005 | 2.4492 | 0.2131 | 985.54  | 986.156  | 7210.4  | 1                       | 734.7  | 72.2 | 2 K.DVNAIAAIK.T                           |
|              | HsSrcap_Ti_205.275 | 4.3851 | 0.1572 | 1742.07 | 1741.953 | 8212.2  | 1                       | 1660.4 | 51.9 | 6 K.RSIQFVDWCPTGFK.V                      |
|              | HsFLAG-ARP6_Ti_1   | 4.7996 | 0.4001 | 1743.87 | 1741.953 | 5585.1  | 1                       | 1005.5 | 73.1 | 32 K.RSIQFVDWCPTGFK.V                     |
|              | HsFLAG-TCF3_Ti_1   | 3.0532 | 0.402  | 1584.47 | 1585.766 | 5401    | 1                       | 539.5  | 58.3 | 17 R.SIQFVDWCPTGFK.V                      |
|              | HsSrcap_Ti_202.297 | 4.5222 | 0.2867 | 1585.72 | 1585.766 | 5721.7  | 1                       | 1065.6 | 75   | 43 R.SIQFVDWCPTGFK.V                      |
|              | HsFLAG-ARP6_Ti_2   | 4.0719 | 0.4153 | 1825.6  | 1826.103 | 3498.4  | 1                       | 615.9  | 58.8 | 34 K.VGINYQPPTVVPGLAK.V                   |
|              | HsFLAG-ARP6_Ti_1   | 6.0682 | 0.4321 | 1865.52 | 1866.108 | 10861.7 | 1                       | 2782.2 | 75   | 18 R.AVCMLSNTTAAIEAWAR.L                  |
|              | HsFLAG-ARP6_Ti_1   | 4.4765 | 0.3204 | 1867.57 | 1866.108 | 8904.4  | 1                       | 1596.3 | 45.3 | 7 R.AVCMLSNTTAAIEAWAR.L                   |
|              | HsFLAG-ARP6_Ti_1   | 3.7547 | 0.214  | 2330.07 | 2331.521 | 8623.8  | 3                       | 888.4  | 34.2 | 2 R.AFVHWYVGEEMEEGFSEAR.E                 |
|              | HsFLAG-ARP6_Ti_1   | 4.334  | 0.4395 | 2330.87 | 2331.521 | 6787.1  | 1                       | 1352.6 | 57.9 | 3 R.AFVHWYVGEEMEEGFSEAR.E                 |
| gil 21626466 | 41                 | 432    | 44.30% | 847     | 94623    | 6.3     | matrin 3 [Homo sapiens] |        |      |                                           |
| gil 62750354 | 41                 | 432    | 44.30% | 847     | 94623    | 6.3     | matrin 3 [Homo sapiens] |        |      |                                           |
|              | HsFLAG-ARP6_Ti_2   | 3.2763 | 0.2749 | 1040.13 | 1040.121 | 5942.3  | 1                       | 1129.5 | 87.5 | 7 K.SFQQSSLSR.D                           |
|              | HsFLAG-UTX1_Ti_2   | 5.4884 | 0.3927 | 2371.44 | 2372.742 | 7455.8  | 1                       | 917.2  | 45.8 | 15 R.DLSAAGIGLLAAATQSLSPASLGR.M           |
|              | HsFlag-VPS71_Ti_1  | 6.1332 | 0.4876 | 2371.97 | 2372.742 | 6044.1  | 1                       | 880.6  | 34.4 | 17 R.DLSAAGIGLLAAATQSLSPASLGR.M           |
|              | HsFLAG-Lin9_Ti_20  | 3.1088 | 0.2671 | 1092.3  | 1092.243 | 3961.5  | 1                       | 616.6  | 83.3 | 7 R.GPLPLSSQHR.G                          |
|              | HsFLAG-TIP49b_Ti_  | 3.2761 | 0.2068 | 2866.61 | 2867.151 | 6354.2  | 2                       | 327.9  | 33.3 | 1 R.GPLPLSSQHRGDADQASNILASFGLSAR.D        |
|              | HsFLAG-TIP49b_Ti_  | 5.884  | 0.3666 | 2867.45 | 2867.151 | 9832.9  | 1                       | 1931.8 | 34.3 | 6 R.GPLPLSSQHRGDADQASNILASFGLSAR.D        |
|              | HsFlag-VPS71_Ti_1  | 5.8029 | 0.4744 | 1794.88 | 1793.931 | 8546.6  | 1                       | 1770   | 67.6 | 26 R.GDADQASNILASFGLSAR.D                 |
|              | HsFLAG-Lin9_Ti_20  | 4.0939 | 0.2691 | 1480.21 | 1480.571 | 7272.1  | 4                       | 1124   | 77.3 | 5 R.DLDELSRYPEDK.I                        |
|              | HsFLAG-p53-DNA-D   | 5.0834 | 0.298  | 3081.86 | 3082.521 | 7141    | 1                       | 1068.2 | 33   | 10 R.DLDELSRYPEDKITPENLPQILLQLK.R         |
|              | HsFLAG-Lin9_Ti_20  | 4.3798 | 0.2484 | 1620.25 | 1620.973 | 5362.9  | 1                       | 1071.1 | 50   | 2 K.ITPENLPQILLQLK.R                      |
|              | HsFLAG-Lin9_Ti_20  | 3.2105 | 0.304  | 1621.05 | 1620.973 | 3772.8  | 1                       | 450.9  | 69.2 | 22 K.ITPENLPQILLQLK.R                     |
|              | HsFLAG-TIP49b_Ti_  | 4.0842 | 0.3478 | 1366.48 | 1366.473 | 8718.8  | 1                       | 1304.6 | 77.3 | 14 R.RTEEGPTLSYGR.D                       |
|              | HsH2AZ-FLAG_293_   | 3.543  | 0.3765 | 1210.3  | 1210.286 | 5880.9  | 1                       | 1457.3 | 85   | 1 R.TEEGPTLSYGR.D                         |
|              | HsFLAG-p53-DNA-D   | 2.5418 | 0.0879 | 2362.15 | 2363.462 | 9704.4  | 2                       | 466.8  | 35   | 1 R.DSFDDRGPSLNPLVDYDHGSR.S               |
|              | HsFlag-NUFIP_Ti_2  | 4.3879 | 0.2831 | 2362.76 | 2363.462 | 7326.1  | 1                       | 1381.2 | 41.2 | 5 R.DSFDDRGPSLNPLVDYDHGSR.S               |
|              | HsFlag-DPCD_Ti_20  | 3.8934 | 0.4056 | 1627.3  | 1627.754 | 5356.6  | 1                       | 851    | 67.9 | 13 R.GPSLNPLVDYDHGSR.S                    |
|              | HsFLAG-TIP49b_Ti_  | 4.3679 | 0.3877 | 2000.14 | 2001.045 | 7192.6  | 1                       | 1335.4 | 70   | 8 R.CRDDSFFGETSHNYHK.F                    |
|              | HsFlag-NUFIP_Ti_2  | 4.3759 | 0.328  | 2000.27 | 2001.045 | 8340.8  | 1                       | 1342   | 45   | 7 R.CRDDSFFGETSHNYHK.F                    |
|              | HsFlag-NUFIP_Ti_2  | 6.3025 | 0.3513 | 1935.67 | 1936.178 | 7196.6  | 2                       | 1645.5 | 47.1 | 9 K.RGAPPSSNIEDFHGLLPK.G                  |
|              | HsFLAG-ARP6_Ti_1   | 3.245  | 0.3324 | 1936.73 | 1936.178 | 5925.7  | 2                       | 406.2  | 50   | 5 K.RGAPPSSNIEDFHGLLPK.G                  |
|              | HsFlag-NUFIP_Ti_2  | 4.0409 | 0.3762 | 1779.26 | 1779.99  | 2870    | 1                       | 395.2  | 65.6 | 6 R.GAPPSSNIEDFHGLLPK.G                   |
|              | HsFlag-NUFIP_Ti_2  | 5.5063 | 0.4171 | 1997.57 | 1998.178 | 8835    | 1                       | 2428.9 | 75   | 10 K.GYPHLCSDLPVHSNK.E                    |
|              | HsFlag-NUFIP_Ti_2  | 3.5669 | 0.2015 | 1997.84 | 1998.178 | 7111.7  | 1                       | 1125.2 | 43.8 | 1 K.GYPHLCSDLPVHSNK.E                     |
|              | HsFLAG-TIP49b_Ti_  | 3.9952 | 0.3528 | 1508.84 | 1509.581 | 6722.2  | 1                       | 970    | 75   | 17 K.EWSQHINGASHSR.R                      |
|              | HsYL1_Ti_103.1307. | 2.2413 | 0.1634 | 1324.57 | 1325.427 | 2820.7  | 1                       | 195    | 61.5 | 1 R.GNLGAGNGNLQGPR.H                      |
|              | HsFlag-VPS71_Ti_1  | 3.2189 | 0.2788 | 1325.58 | 1325.427 | 8982.7  | 1                       | 1199.4 | 69.2 | 4 R.GNLGAGNGNLQGPR.H                      |
|              | HsFLAG-TIP49b_Ti_  | 2.9129 | 0.2528 | 1144.46 | 1145.365 | 6089.4  | 1                       | 677.2  | 68.8 | 12 R.VVHIMDFQR.G                          |
|              | HsFLAG-FLJ20729_   | 3.0313 | 0.3788 | 1145.36 | 1145.365 | 4796.6  | 1                       | 1161.7 | 93.8 | 14 R.VVHIMDFQR.G                          |
|              | HsFlag-NUFIP_Ti_11 | 6.1565 | 0.4426 | 2439.7  | 2439.903 | 4931.1  | 1                       | 851    | 60   | 25 R.YQLLQLVEPFVVISNHLILNK.I              |
|              | HsFlag-NUFIP_Ti_11 | 4.7563 | 0.3991 | 2440    | 2439.903 | 6300.7  | 1                       | 900.3  | 36.2 | 38 R.YQLLQLVEPFVVISNHLILNK.I              |
|              | HsYL1_Ti_105.3602. | 3.5809 | 0.2044 | 3733.05 | 3735.2   | 8015.7  | 3                       | 406.1  | 18.9 | 2 K.INEAFIEMATTEDAQAAYDYTTTTPALVFGKPV.R.V |

|                |                    |        |        |         |          |         |   |        |      |                                                                                                            |
|----------------|--------------------|--------|--------|---------|----------|---------|---|--------|------|------------------------------------------------------------------------------------------------------------|
|                | HsFLAG-TIP49b_Ti_  | 2.5212 | 0.167  | 1026.4  | 1027.166 | 5332.8  | 8 | 562.4  | 68.8 | 2 K.KPEGKPDQK.F                                                                                            |
|                | HsFLAG-ARP6_Ti_1   | 4.806  | 0.4114 | 2037.75 | 2038.311 | 6562.6  | 1 | 1524.9 | 47.2 | 6 R.VIHLSNLPHSGYSDSAVLK.L                                                                                  |
|                | HsFLAG-TIP49b_Ti_  | 5.6359 | 0.3425 | 2039.72 | 2038.311 | 5332    | 1 | 1055.3 | 66.7 | 35 R.VIHLSNLPHSGYSDSAVLK.L                                                                                 |
|                | HsFlag-DPCD_Ti_20  | 4.4425 | 0.4401 | 1915.24 | 1916.049 | 9223.9  | 1 | 2300.7 | 75   | 4 K.IEELDQENEAALENGIK.N                                                                                    |
|                | HsMRGBP-FLAG_Ti_   | 4.824  | 0.4774 | 2778.97 | 2778.727 | 7619.7  | 1 | 1481.6 | 54.3 | 4 K.DTSENADGQSDENKDDYTIPEYR.I                                                                              |
|                | HsFLAG-Lin9_Ti_20  | 4.2844 | 0.3729 | 1970.25 | 1970.319 | 6024.8  | 1 | 1334.6 | 45.6 | 2 R.IGPYQPNVPVIGIDYVIPK.T                                                                                  |
|                | HsMRGBP-FLAG_Ti_   | 3.9507 | 0.3183 | 1971.58 | 1970.319 | 4552.3  | 1 | 692.8  | 58.8 | 31 R.IGPYQPNVPVIGIDYVIPK.T                                                                                 |
|                | HsFLAG-Lin9_Ti_20  | 3.6723 | 0.25   | 1572.12 | 1574.737 | 6568.8  | 1 | 921.8  | 70.8 | 11 K.LCSLFYTNEEVAK.N                                                                                       |
|                | HsFLAG-Lin9_Ti_20  | 3.6441 | 0.2961 | 1472.36 | 1472.566 | 6016.2  | 1 | 611.1  | 68.2 | 6 K.NTHCSSLPHYQK.L                                                                                         |
|                | HsFLAG-TIP49b_Ti_  | 3.7711 | 0.3885 | 1472.42 | 1472.566 | 7370.8  | 1 | 1223.1 | 77.3 | 20 K.NTHCSSLPHYQK.L                                                                                        |
| gij 14211843 r |                    | 5      | 16     | 44.30%  | 122      | 13895   |   |        |      | 4.8 short coiled-coil protein [Homo sapiens]                                                               |
| *              | HsFLAG-TCF3_Ti_10  | 5.7242 | 0.3985 | 2092.56 | 2093.388 | 10112.9 | 1 | 2328   | 67.6 | 5 R.LINQVLELQHTLEDLSAR.V                                                                                   |
| *              | HsFLAG-TCF3_Ti_10  | 5.0454 | 0.3084 | 2093.68 | 2093.388 | 6271.7  | 1 | 1658.6 | 50   | 4 R.LINQVLELQHTLEDLSAR.V                                                                                   |
| *              | HsFLAG-TCF3_Ti_10  | 2.6956 | 0.0978 | 1146.36 | 1145.298 | 5938.2  | 2 | 915    | 83.3 | 1 R.VDAVKEENLK.L                                                                                           |
| *              | HsFLAG-TCF3_Ti_10  | 4.677  | 0.4327 | 2890.97 | 2892.164 | 8820.8  | 1 | 1399.4 | 46   | 4 K.SENQVLGQYIENLMSASSVFQTTDTK.S                                                                           |
| *              | HsFLAG-TCF3_Ti_10  | 6.161  | 0.4097 | 2891.59 | 2892.164 | 12589.9 | 1 | 1585.5 | 32   | 2 K.SENQVLGQYIENLMSASSVFQTTDTK.S                                                                           |
| gij 14141166 r |                    | 10     | 45     | 44.20%  | 362      | 38222   |   |        |      | 6.8 poly(rC)-binding protein 2 isoform b [Homo sapiens]                                                    |
| gij 14141168 r |                    | 10     | 45     | 43.70%  | 366      | 38651   |   |        |      | 6.8 poly(rC)-binding protein 2 isoform a [Homo sapiens]                                                    |
|                | HsARP6-FLAG_Ti_1   | 3.1504 | 0.1495 | 1290.13 | 1289.354 | 6671.6  | 3 | 866.9  | 70   | 1 R.INISEGNCPER.I                                                                                          |
|                | HsFLAG-Lin9_Ti_20  | 3.8142 | 0.3117 | 1358.8  | 1359.652 | 6178    | 1 | 712.3  | 66.7 | 3 R.IITLAGPTNAIFK.A                                                                                        |
|                | HsFLAG-p53-DNA-D   | 3.7563 | 0.2841 | 1359.12 | 1359.652 | 4604    | 1 | 1031.7 | 83.3 | 15 R.IITLAGPTNAIFK.A                                                                                       |
|                | HsFLAG-ARP6_Ti_1   | 4.229  | 0.2884 | 3353.91 | 3353.831 | 7765.5  | 1 | 776.9  | 25   | 4 K.AFAMIIDKLEEDISSMTNSTAASRPPVTLR.L                                                                       |
|                | HsFLAG-Lin9_Ti_20  | 3.4935 | 0.3709 | 1429.07 | 1429.666 | 3637.5  | 3 | 395.4  | 65.4 | 1 R.LVVPASQCGSLIGK.G                                                                                       |
|                | HsFLAG-Lin9_Ti_20  | 4.6761 | 0.4043 | 2089.82 | 2091.257 | 7514.3  | 1 | 1044   | 52.6 | 7 R.ESTGAQVQVAGDMLPNSTER.A                                                                                 |
|                | HsFLAG-Lin9_Ti_20  | 4.065  | 0.421  | 1715.07 | 1714.022 | 3460.1  | 1 | 517.1  | 63.3 | 10 R.AITIAGIPQSIIECVK.Q                                                                                    |
|                | HsFLAG-FLJ20729_   | 4.3205 | 0.4615 | 2430.73 | 2430.769 | 4966.5  | 1 | 632.9  | 34.1 | 2 K.GVTIPYRKPSSSPVIFAGGQDR.Y                                                                               |
|                | HsFLAG-ARP6_Ti_1   | 3.9872 | 0.4442 | 2205.8  | 2206.547 | 9661.6  | 1 | 709.1  | 42.5 | 1 R.QVTITGSAASISLAQYLINVR.L                                                                                |
|                | HsFLAG-p53-DNA-D   | 2.0012 | 0.2148 | 1012.45 | 1013.064 | 6156.7  | 2 | 416.5  | 60   | 1 R.LSSETGGMGSS.-                                                                                          |
| gij 5902076 re |                    | 13     | 76     | 44.00%  | 248      | 27745   |   |        |      | 10.4 splicing factor, arginine/serine-rich 1 (splicing factor 2, alternate splicing factor) [Homo sapiens] |
| *              | HsARP6-FLAG_Ti_1   | 3.5644 | 0.3301 | 1258.46 | 1257.475 | 4329.5  | 1 | 750.7  | 80   | 9 R.IYVGNLPPDIR.T                                                                                          |
| *              | HsH2AZ-FLAG_293_   | 2.6651 | 0.137  | 1028.25 | 1029.134 | 6056.2  | 8 | 612.3  | 78.6 | 2 K.DIEDVFYK.Y                                                                                             |
| *              | HsFlag-NUFIP_Ti_10 | 4.4245 | 0.298  | 1722.02 | 1721.913 | 6524.5  | 1 | 1811.8 | 51.8 | 4 R.RGGPPFAFVEFEDPR.D                                                                                      |
| *              | HsFlag-NUFIP_Ti_10 | 4.5453 | 0.4353 | 1565.47 | 1565.725 | 4993.7  | 1 | 1110.4 | 73.1 | 25 R.GGPPFAFVEFEDPR.D                                                                                      |
| *              | HsFlag-NUFIP_Ti_10 | 4.0372 | 0.2715 | 2541.67 | 2542.723 | 4586.7  | 2 | 346.5  | 38.6 | 11 R.GGPPFAFVEFEDPRDAEDAVYGR.D                                                                             |
| *              | HsFlag-NUFIP_Ti_10 | 2.0609 | 0.1989 | 995.48  | 996.021  | 3620.8  | 1 | 510.9  | 75   | 1 R.DAEDAVYGR.D                                                                                            |
| *              | HsFLAG-ARP6_Ti_1   | 2.1911 | 0.3042 | 1123.38 | 1124.108 | 2694.8  | 5 | 309.1  | 68.8 | 2 R.DGYDYDGYR.L                                                                                            |
| *              | HsFLAG-ARP6_Ti_1   | 3.0876 | 0.3576 | 1124.2  | 1124.108 | 4127.7  | 1 | 1013.3 | 87.5 | 2 R.DGYDYDGYR.L                                                                                            |
| *              | HsFlag-NUFIP_Ti_10 | 3.3671 | 0.3036 | 1669.61 | 1669.918 | 2975.1  | 7 | 275.4  | 53.3 | 2 R.VVVSGLPPSGSWQDLK.D                                                                                     |
| *              | HsFLAG-ARP6_Ti_1   | 3.792  | 0.4251 | 1418.27 | 1418.469 | 5696.7  | 1 | 833.2  | 72.7 | 4 R.EAGDVCYADVYR.D                                                                                         |
| *              | HsARP6-FLAG_Ti_1   | 3.0675 | 0.1031 | 1079.15 | 1079.198 | 5323.3  | 1 | 1006.8 | 83.3 | 4 R.DGTGVVEFVR.K                                                                                           |
| *              | HsFLAG-p53-DNA-D   | 1.81   | 0.1737 | 1112.33 | 1113.274 | 4728.6  | 4 | 320.5  | 62.5 | 1 R.KEDMTYAVR.K                                                                                            |
| *              | HsFLAG-ARP6_Ti_1   | 3.5358 | 0.2676 | 1165.98 | 1163.232 | 5070.7  | 1 | 1133.6 | 94.4 | 9 R.SHEGETAYIR.V                                                                                           |
| gij 25453472 r |                    | 10     | 38     | 43.80%  | 281      | 31122   |   |        |      | 5 eukaryotic translation elongation factor 1 delta isoform 2 [Homo sapiens]                                |

|                    |        |        |         |          |        |                                                                               |        |      |    |                                        |
|--------------------|--------|--------|---------|----------|--------|-------------------------------------------------------------------------------|--------|------|----|----------------------------------------|
| gi 25453474 r      | 10     | 38     | 19.00%  | 647      | 71408  | 6.4 eukaryotic translation elongation factor 1 delta isoform 1 [Homo sapiens] |        |      |    |                                        |
| HsFlag-VPS71_Ti_1( | 4.4888 | 0.4058 | 1529.32 | 1527.695 | 7655.2 | 1                                                                             | 1537.7 | 76.9 | 1  | R.FYEQMNGPVAGASR.Q                     |
| HsFLAG-ARP6_Ti_1   | 5.1818 | 0.4938 | 2185.99 | 2186.3   | 7722.2 | 1                                                                             | 987.9  | 47.8 | 7  | K.SLAGSSGPGASSGTSGDHGELVVR.I           |
| HsFLAG-TCF3_Ti_1(  | 4.1002 | 0.1851 | 1300.45 | 1300.498 | 6408.6 | 1                                                                             | 1425.9 | 81.8 | 6  | R.GVVQELQQAISK.L                       |
| HsFlag-VPS71_Ti_1( | 2.8505 | 0.1426 | 1423.58 | 1424.618 | 4652   | 7                                                                             | 222.1  | 50   | 1  | R.ATAPQTQHVSMPR.Q                      |
| HsFLAG-ARP6_Ti_1   | 3.3714 | 0.2141 | 1423.79 | 1424.618 | 5879.6 | 1                                                                             | 832.5  | 66.7 | 7  | R.ATAPQTQHVSMPR.Q                      |
| HsFLAG-FLJ20309_   | 2.2092 | 0.0972 | 726.49  | 726.938  | 3544.8 | 2                                                                             | 369.7  | 75   | 6  | K.KPALVAK.S                            |
| HsFlag-VPS71_Ti_1( | 4.3908 | 0.2963 | 1375.45 | 1374.58  | 8237.1 | 1                                                                             | 2270   | 87.5 | 2  | R.SIQLDGLVWGASK.L                      |
| HsARP6-FLAG_Ti_1   | 3.1041 | 0.1913 | 1475.33 | 1475.648 | 7720.8 | 1                                                                             | 1139.3 | 77.3 | 1  | R.KLQIQCVVEDDK.V                       |
| HsFlag-VPS71_Ti_1( | 3.6688 | 0.1914 | 1348.34 | 1347.474 | 4763.4 | 1                                                                             | 872.7  | 80   | 2  | K.LQIQCVVEDDK.V                        |
| HsFlag-VPS71_Ti_1( | 6.2851 | 0.4534 | 3176.18 | 3176.547 | 8861   | 1                                                                             | 2146.7 | 34.3 | 5  | K.VGTDLLEEEITKFEHVQSVDAAFNKI.-         |
| gi 14043070 r      | 20     | 160    | 43.50%  | 372      | 38747  | 9.1 heterogeneous nuclear ribonucleoprotein A1 isoform b [Homo sapiens]       |        |      |    |                                        |
| gi 4504445 re      | 20     | 160    | 50.60%  | 320      | 34196  | 9.2 heterogeneous nuclear ribonucleoprotein A1 isoform a [Homo sapiens]       |        |      |    |                                        |
| HsFLAG-p53-DNA-D   | 3.0406 | 0.1578 | 1300.51 | 1300.411 | 5352.9 | 1                                                                             | 844.5  | 80   | 5  | K.SESPKEPEQLR.K                        |
| HsFLAG-p53-DNA-D   | 3.2219 | 0.1513 | 1428.09 | 1428.585 | 5677.4 | 2                                                                             | 801.4  | 77.3 | 2  | K.SESPKEPEQLRK.L                       |
| HsFLAG-p53-DNA-D   | 3.8687 | 0.1704 | 1913.4  | 1914.166 | 7228.4 | 8                                                                             | 888.5  | 39.1 | 1  | R.KLFIGGLSFETTDESLR.S                  |
| HsFlag-VPS71_Ti_1( | 5.1633 | 0.3583 | 1786.14 | 1785.992 | 6484.5 | 1                                                                             | 1954.1 | 83.3 | 48 | K.LFIGGLSFETTDESLR.S                   |
| HsFlag-VPS71_Ti_1( | 5.0503 | 0.4516 | 2521.98 | 2522.761 | 7244.9 | 1                                                                             | 1189.9 | 55   | 2  | R.SHFEQWGTLTDCVVMRDPNTK.R              |
| HsFLAG-p53-DNA-D   | 4.0844 | 0.1983 | 2522.3  | 2522.761 | 6421.6 | 1                                                                             | 686    | 33.8 | 2  | R.SHFEQWGTLTDCVVMRDPNTK.R              |
| HsFLAG-p53-DNA-D   | 5.3975 | 0.5236 | 2148.33 | 2149.383 | 10346  | 1                                                                             | 1878.8 | 60.5 | 7  | R.GFGFVTYATVEEVDAAMNAR.P               |
| HsFlag-VPS71_Ti_1( | 4.819  | 0.4507 | 2511.61 | 2511.814 | 7887.6 | 1                                                                             | 891.3  | 45.5 | 4  | R.GFGFVTYATVEEVDAAMNARPHK.V            |
| HsFLAG-p53-DNA-D   | 3.6762 | 0.3178 | 2939.29 | 2939.275 | 6079.2 | 1                                                                             | 609.8  | 27.9 | 1  | R.GFGFVTYATVEEVDAAMNARPHKVDGR.V        |
| HsFLAG-ARP5_Ti_1   | 3.2256 | 0.1205 | 1437.74 | 1438.583 | 5828.9 | 1                                                                             | 515.7  | 62.5 | 2  | R.EDSQRPGAHLTVK.K                      |
| HsFLAG-p53-DNA-D   | 3.6907 | 0.1927 | 1220.14 | 1219.439 | 7676.3 | 1                                                                             | 1667.5 | 88.9 | 3  | K.IEVIEIMTDR.G                         |
| HsFLAG-Lin9_Ti_20  | 5.2831 | 0.3359 | 1856.33 | 1856.989 | 7657.7 | 1                                                                             | 1774.9 | 50   | 1  | K.RGFAFVTFDDHDSVDK.I                   |
| HsFLAG-Lin9_Ti_20  | 4.3543 | 0.3782 | 1858.18 | 1856.989 | 9098.4 | 1                                                                             | 913.1  | 60   | 12 | K.RGFAFVTFDDHDSVDK.I                   |
| HsFLAG-p53-DNA-D   | 4.428  | 0.2888 | 1700.46 | 1700.802 | 5988   | 1                                                                             | 1476.1 | 78.6 | 18 | R.GFAFVTFDDHDSVDK.I                    |
| HsFlag-VPS71_Ti_1( | 3.9174 | 0.2864 | 1486.86 | 1486.553 | 7688.4 | 1                                                                             | 1598.8 | 81.8 | 14 | K.YHTVNGHNCEVR.K                       |
| HsFLAG-Lin9_Ti_20  | 2.9389 | 0.1647 | 1613.63 | 1614.727 | 7325.1 | 1                                                                             | 1020.3 | 70.8 | 1  | K.YHTVNGHNCEVRK.A                      |
| HsFlag-VPS71_Ti_1( | 2.7146 | 0.3137 | 1375.54 | 1376.468 | 7140   | 1                                                                             | 628.8  | 57.7 | 5  | R.SSGPYGGGGQYFAK.P                     |
| HsFlag-VPS71_Ti_1( | 3.9291 | 0.3126 | 1377.7  | 1376.468 | 4784.6 | 1                                                                             | 826    | 73.1 | 2  | R.SSGPYGGGGQYFAK.P                     |
| HsFLAG-ARP6_Ti_1   | 4.2724 | 0.4124 | 1629.4  | 1629.772 | 7173.5 | 1                                                                             | 1307.5 | 66.7 | 23 | R.SSGPYGGGGQYFAKPR.N                   |
| HsFLAG-p53-DNA-D   | 4.7302 | 0.4736 | 1695.6  | 1695.656 | 7009.5 | 1                                                                             | 873.8  | 55.9 | 7  | R.NQGGYGGSSSSSYGSGR.R                  |
| gi 22202633 r      | 6      | 20     | 43.50%  | 154      | 17328  | 6.3 prefoldin 5 isoform alpha [Homo sapiens]                                  |        |      |    |                                        |
| HsFLAG-p53-DNA-D   | 6.0367 | 0.4147 | 2064.65 | 2064.3   | 8124.5 | 1                                                                             | 2348.4 | 76.5 | 7  | K.NQLDQEVFLSTSIAQLK.V                  |
| HsFLAG-p53-DNA-D   | 5.5785 | 0.297  | 2065.17 | 2064.3   | 7744.6 | 1                                                                             | 2256   | 51.5 | 3  | K.NQLDQEVFLSTSIAQLK.V                  |
| HsFLAG-p53-DNA-D   | 4.3908 | 0.4341 | 1634.68 | 1634.971 | 3193.8 | 1                                                                             | 623.9  | 71.4 | 2  | K.ELLVPLTSSMYVPGK.L                    |
| HsFLAG-p53-DNA-D   | 4.2011 | 0.3709 | 3802.25 | 3803.405 | 5271.7 | 1                                                                             | 314.8  | 20.5 | 1  | K.ELLVPLTSSMYVPGKLHDVEHVLIDVGTGYVVEK.T |
| HsFLAG-p53-DNA-D   | 5.9323 | 0.378  | 2186.47 | 2187.457 | 9500.7 | 1                                                                             | 2025   | 61.1 | 5  | K.LHDVEHVLIDVGTGYVVEK.T                |
| HsFLAG-p53-DNA-D   | 5.3571 | 0.3776 | 1485.5  | 1485.724 | 6429.3 | 1                                                                             | 1674.4 | 78.6 | 2  | K.IQQLTALGAAQATAK.A                    |
| gi 11968182 r      | 10     | 20     | 43.40%  | 152      | 17719  | 11 ribosomal protein S18 [Homo sapiens]                                       |        |      |    |                                        |
| HsFLAG-ARP6_Ti_1   | 3.1027 | 0.1301 | 948.22  | 948.194  | 2976.8 | 1                                                                             | 824.8  | 93.8 | 1  | K.IAFAITAIK.G                          |
| HsFlag-NUFIP_Ti_11 | 3.0149 | 0.1657 | 1014.24 | 1014.219 | 7361.6 | 1                                                                             | 973.6  | 92.9 | 2  | R.RYAHVVL.RK                           |

|                |                    |        |        |         |          |         |   |        |      |                                                                    |
|----------------|--------------------|--------|--------|---------|----------|---------|---|--------|------|--------------------------------------------------------------------|
|                | HsFlag-NUFIP_Ti_1C | 2.6196 | 0.2233 | 858.99  | 858.031  | 4609.3  | 1 | 712.6  | 91.7 | 1 R.YAHVVLR.K                                                      |
|                | HsFlag-NUFIP_Ti_1C | 2.0378 | 0.1339 | 903.57  | 904.051  | 4335.5  | 2 | 431.4  | 71.4 | 1 R.KADIDLT.K.R                                                    |
| *              | HsFLAG-ARP6_Ti_1   | 4.1065 | 0.3422 | 1404.29 | 1404.476 | 6003.1  | 1 | 1533.6 | 86.4 | 4 K.RAGELTEDEVER.V                                                 |
| *              | HsFlag-NUFIP_Ti_1C | 3.5203 | 0.2353 | 1247.59 | 1248.289 | 6146.9  | 1 | 905.9  | 75   | 2 R.AGELTEDEVER.V                                                  |
| *              | HsFlag-NUFIP_Ti_1C | 3.4238 | 0.2061 | 1072.43 | 1072.311 | 6258.1  | 3 | 1063.1 | 87.5 | 1 R.VITIMQNPR.Q                                                    |
|                | HsFlag-NUFIP_Ti_1C | 1.9671 | 0.1171 | 1060.66 | 1061.228 | 3291.3  | 7 | 238.1  | 64.3 | 1 K.IPDWFLNR.Q                                                     |
|                | HsFLAG-ARP6_Ti_1   | 2.9088 | 0.1132 | 1061.31 | 1061.228 | 4158.4  | 2 | 657.6  | 92.9 | 6 K.IPDWFLNR.Q                                                     |
|                | HsFLAG-TCF3_Ti_1C  | 3.3146 | 0.3239 | 1321.52 | 1322.461 | 5926.2  | 1 | 566.8  | 63.6 | 1 K.YSQVLANGLDNK.L                                                 |
| gij 4506695 re | 8                  | 36     | 43.40% | 145     | 16060    | 10.3    |   |        |      | ribosomal protein S19 [Homo sapiens]                               |
| *              | HsFlag-NUFIP_Ti_1C | 3.3123 | 0.1893 | 1135.34 | 1135.222 | 7084.5  | 1 | 1096.1 | 87.5 | 2 K.DVNQQEFVR.A                                                    |
| *              | HsFlag-NUFIP_Ti_1C | 2.1942 | 0.1127 | 1072.67 | 1073.234 | 8746.1  | 1 | 863.7  | 75   | 1 K.VPEWVDTV.K.L                                                   |
| *              | HsFLAG-p53-DNA-D   | 3.46   | 0.3757 | 1970.75 | 1970.151 | 4466.2  | 1 | 501.5  | 53.6 | 2 K.HKELAPYDENWFYTR.A                                              |
| *              | HsFlag-NUFIP_Ti_1C | 4.0246 | 0.3891 | 1704.47 | 1704.836 | 4913.9  | 1 | 732.6  | 75   | 9 K.ELAPYDENWFYTR.A                                                |
| *              | HsFlag-NUFIP_Ti_1C | 2.7035 | 0.3098 | 1133.46 | 1132.282 | 4767.1  | 1 | 728.5  | 77.8 | 1 R.NGVMPSHFSR.G                                                   |
| *              | HsFlag-NUFIP_Ti_1C | 3.2476 | 0.0982 | 1127.64 | 1127.373 | 6510.3  | 1 | 1385.1 | 88.9 | 14 R.RVLQALEGLK.M                                                  |
| *              | HsFLAG-p53-DNA-D   | 2.189  | 0.1351 | 942.52  | 943.091  | 9789.8  | 1 | 670.3  | 61.1 | 2 R.IAGQVAAANK.K                                                   |
| *              | HsFLAG-p53-DNA-D   | 3.2545 | 0.2951 | 944.05  | 943.091  | 5562.2  | 1 | 878.2  | 83.3 | 5 R.IAGQVAAANK.K                                                   |
| gij 74136883 r | 35                 | 153    | 43.00% | 825     | 90585    | 6       |   |        |      | heterogeneous nuclear ribonucleoprotein U isoform a [Homo sapiens] |
|                | HsFLAG-p53-DNA-D   | 3.6714 | 0.1313 | 1203.28 | 1203.422 | 8106.9  | 6 | 1133.8 | 77.8 | 4 K.VSELKEELK.K.R                                                  |
|                | HsFLAG-FLJ20729_   | 4.8069 | 0.3769 | 3128.35 | 3128.311 | 8146.3  | 1 | 1040.6 | 27.4 | 5 R.LQAALDDEEAGGRPAMEPGNGSLDLGGDSAGR.S                             |
|                | HsFLAG-p53-DNA-D   | 3.5121 | 0.318  | 1716.12 | 1715.947 | 5790    | 1 | 646.8  | 50   | 9 K.SSGPTSLFAVTVAPPGAR.Q                                           |
| *              | HsFLAG-p53-DNA-D   | 3.7853 | 0.407  | 2154.43 | 2154.304 | 5923.6  | 2 | 372.5  | 41.3 | 2 K.KAEGGGGGRRGPAPAAGDGKTEQK.G                                     |
|                | HsFLAG-p53-DNA-D   | 3.5659 | 0.2137 | 2546.51 | 2546.718 | 6853.7  | 1 | 699.2  | 32.9 | 1 R.PREDHGRGYFEYIEENKYSR.A                                         |
|                | HsSrcap_Ti_202.223 | 2.6717 | 0.2987 | 1291.34 | 1292.387 | 8590.8  | 1 | 654.3  | 66.7 | 2 R.GYFEYIEENK.Y                                                   |
|                | HsFLAG-Lin9_Ti_20  | 4.3457 | 0.3532 | 1293.29 | 1292.387 | 8915.7  | 1 | 1333.9 | 77.8 | 11 R.GYFEYIEENK.Y                                                  |
|                | HsFLAG-p53-DNA-D   | 4.1626 | 0.4118 | 1697.87 | 1698.829 | 6853.7  | 1 | 1087.5 | 75   | 8 R.GYFEYIEENKYSR.A                                                |
|                | HsFlag-VPS71_Ti_1C | 2.5369 | 0.2163 | 2032.15 | 2032.321 | 9376.8  | 1 | 682.5  | 44.4 | 1 R.LSASLTMESFAFLWAGGR.A                                           |
|                | HsFLAG-Lin9_Ti_20  | 2.9738 | 0.1931 | 996.27  | 997.096  | 7751.1  | 4 | 1087   | 85.7 | 1 K.DIDIHEVR.I                                                     |
|                | HsFLAG-Lin9_Ti_20  | 3.4817 | 0.4053 | 2843.24 | 2843.98  | 9965    | 1 | 600.7  | 34.8 | 3 K.FDENDVITCFANFESDEVELSYAK.N                                     |
|                | HsFLAG-Lin9_Ti_20  | 2.4706 | 0.2981 | 1048.39 | 1049.172 | 4533.7  | 8 | 233.8  | 61.1 | 1 K.NGQDLGVAFK.I                                                   |
|                | HsFLAG-Lin9_Ti_20  | 3.2219 | 0.1975 | 1049.33 | 1049.172 | 8492.1  | 1 | 1133.2 | 83.3 | 2 K.NGQDLGVAFK.I                                                   |
|                | HsFLAG-Lin9_Ti_20  | 6.1426 | 0.3588 | 3040.84 | 3041.414 | 10440.7 | 1 | 2201   | 37   | 2 K.EVLAGRPLFPHVLCHNCAVEFNFGQK.E                                   |
|                | HsFLAG-Lin9_Ti_20  | 4.2536 | 0.3608 | 2415.48 | 2415.689 | 5433.7  | 1 | 1093.5 | 40.8 | 2 R.PLFPVLCHNCAVEFNFGQK.E                                          |
|                | HsFLAG-Lin9_Ti_20  | 3.9027 | 0.3138 | 2416.29 | 2415.689 | 11331.9 | 1 | 1475.2 | 52.6 | 2 R.PLFPVLCHNCAVEFNFGQK.E                                          |
|                | HsFLAG-p53-DNA-D   | 5.2469 | 0.3326 | 2726.06 | 2726.058 | 7238.1  | 2 | 602.9  | 29.8 | 16 K.EKPYFPIPEEYTFIQNVPLEDR.V                                      |
|                | HsFLAG-Lin9_Ti_20  | 3.6017 | 0.1424 | 2727.06 | 2726.058 | 5694.6  | 1 | 874    | 52.4 | 4 K.EKPYFPIPEEYTFIQNVPLEDR.V                                       |
|                | HsFlag-VPS71_Ti_1C | 4.6269 | 0.3975 | 2467.91 | 2468.768 | 4834.9  | 1 | 657.4  | 52.6 | 7 K.PYFPIPEEYTFIQNVPLEDR.V                                         |
|                | HsFLAG-FLJ20729_   | 4.1581 | 0.3646 | 1706.28 | 1706.035 | 8412.2  | 1 | 1159.5 | 60   | 2 K.KDCEVMMIGLPGAGK.T                                              |
|                | HsFLAG-FLJ20729_   | 3.814  | 0.299  | 1577.48 | 1577.861 | 8355.6  | 1 | 1531.8 | 67.9 | 2 K.DCEVMMIGLPGAGK.T                                               |
|                | HsFLAG-p53-DNA-D   | 4.1722 | 0.2862 | 2188.64 | 2188.463 | 8734.8  | 1 | 847.5  | 47.4 | 1 K.HAAENPGKYNILGTNTIMDK.M                                         |
|                | HsFLAG-FLJ20729_   | 3.6121 | 0.2541 | 1383.36 | 1383.603 | 5657.8  | 1 | 1646.8 | 86.4 | 5 K.YNILGTNTIMDK.M                                                 |
|                | HsFLAG-p53-DNA-D   | 2.0216 | 0.1131 | 783.52  | 784.022  | 7544.4  | 1 | 737.8  | 83.3 | 1 K.MMVAGFK.K                                                      |
|                | HsSrcap_Ti_204.194 | 4.9388 | 0.3509 | 1804.81 | 1805.004 | 4556.2  | 1 | 779    | 66.7 | 13 K.RNFILDQTNVSAQAQR.R                                            |

|             |                    |        |        |         |          |         |   |        |      |    |                                                                     |
|-------------|--------------------|--------|--------|---------|----------|---------|---|--------|------|----|---------------------------------------------------------------------|
|             | HsFLAG-p53-DNA-D   | 5.3142 | 0.3075 | 1649.64 | 1648.816 | 7998.9  | 1 | 3267.4 | 89.3 | 12 | R.NFILDQTNVSAQAQR.R                                                 |
|             | HsFLAG-p53-DNA-D   | 3.3018 | 0.2814 | 1130.3  | 1130.316 | 5406    | 1 | 1295.7 | 93.8 | 2  | K.MCLFAGFQR.K                                                       |
|             | HsFlag-VPS71_Ti_10 | 3.0535 | 0.3036 | 1423.58 | 1423.572 | 4959.1  | 1 | 816.9  | 72.7 | 5  | K.AVVVCPKDEDYK.Q                                                    |
|             | HsFLAG-Lin9_Ti_20  | 3.5467 | 0.4232 | 2605.69 | 2603.851 | 6912.2  | 1 | 513.9  | 40.5 | 4  | K.GNFTLPEVAECFDEITYVELQK.E                                          |
|             | HsFLAG-p53-DNA-D   | 2.8634 | 0.106  | 1266.63 | 1267.422 | 7387.8  | 5 | 662.3  | 66.7 | 1  | K.LLEQYKEESK.K                                                      |
|             | HsFLAG-p53-DNA-D   | 3.6232 | 0.1822 | 1267.47 | 1267.422 | 7839.9  | 3 | 1240.5 | 83.3 | 4  | K.LLEQYKEESK.K                                                      |
|             | HsFLAG-p53-DNA-D   | 3.9145 | 0.2282 | 1394.96 | 1395.596 | 9660.9  | 1 | 1504.5 | 80   | 3  | K.LLEQYKEESK.K                                                      |
|             | HsFLAG-Lin9_Ti_20  | 5.2866 | 0.4897 | 2212.15 | 2213.333 | 9677.9  | 1 | 1617.1 | 61.8 | 10 | K.NQSQGYNQWQQGQFWGQK.P                                              |
|             | HsFLAG-p53-DNA-D   | 4.0413 | 0.3322 | 3659.67 | 3660.864 | 9522.7  | 1 | 670.3  | 24.1 | 3  | K.NQSQGYNQWQQGQFWGQK.PWSQHYHQGY.-                                   |
|             | HsFLAG-Lin9_Ti_20  | 3.2864 | 0.3231 | 1466.39 | 1466.555 | 9169.6  | 1 | 1221.7 | 75   | 2  | K.PWSQHYHQGY.-                                                      |
| gi 33286418 |                    | 16     | 46     | 42.90%  | 531      | 57937   |   |        |      |    | 7.8 pyruvate kinase 3 isoform 1 [Homo sapiens]                      |
|             | HsFlag-VPS71_Ti_10 | 4.4192 | 0.3855 | 1360.9  | 1360.519 | 7391.4  | 2 | 1262.3 | 75   | 3  | R.NTGIICTIGPASR.S                                                   |
|             | HsFlag-VPS71_Ti_10 | 4.227  | 0.4227 | 1884.61 | 1885.046 | 7849.9  | 1 | 1023.8 | 60   | 2  | R.LNFSGHGTHEYHAETIK.N                                               |
|             | HsFlag-VPS71_Ti_10 | 4.3665 | 0.3714 | 2465.98 | 2466.794 | 4031.4  | 1 | 332.6  | 40.9 | 6  | R.TATESFASDPILYRPVAVALDTK.G                                         |
|             | HsFlag-VPS71_Ti_10 | 2.752  | 0.3092 | 1119.93 | 1119.26  | 7890    | 5 | 728.8  | 65   | 2  | K.GSGTAEVELKK.G                                                     |
|             | HsFlag-VPS71_Ti_10 | 4.6883 | 0.3172 | 1470.61 | 1469.6   | 6337.6  | 1 | 1489.6 | 90   | 2  | K.CDENILWLDYK.N                                                     |
|             | HsH2AZ-FLAG_293_   | 4.2933 | 0.3682 | 1780.32 | 1780.929 | 7349.3  | 1 | 1936.2 | 70.6 | 3  | K.GADFLVTEVENGGSLGSK.K                                              |
|             | HsFLAG-ARP6_Ti_1   | 5.5277 | 0.4773 | 1765.11 | 1766.048 | 4590.9  | 1 | 1037.8 | 67.6 | 9  | K.KGVNLPAAVDLPAVSEK.D                                               |
|             | HsFLAG-p53-DNA-D   | 4.7037 | 0.3492 | 2477.47 | 2478.849 | 10005.2 | 1 | 1540.2 | 34.8 | 1  | K.KGVNLPAAVDLPAVSEKDIQDLK.F                                         |
|             | HsFlag-FLJ90652_2  | 3.3152 | 0.4024 | 1637.32 | 1637.874 | 5731.6  | 1 | 869.7  | 62.5 | 1  | K.GVNLPAAVDLPAVSEK.D                                                |
|             | HsFlag-VPS71_Ti_10 | 3.8713 | 0.4065 | 1878.13 | 1878.262 | 6515.9  | 1 | 1206.9 | 65.6 | 1  | R.AGKPVICATQMLESMIK.K                                               |
|             | HsFlag-VPS71_Ti_10 | 4.3743 | 0.1831 | 3496.91 | 3496.791 | 6176.7  | 1 | 661.3  | 24.2 | 2  | R.AEGSDVANAVLDGADCIMLSGETAKGDYPLEAVR.M                              |
| *           | HsH2AZ-FLAG_293_   | 3.2855 | 0.3664 | 1932.83 | 1933.171 | 10004.3 | 1 | 989.2  | 56.7 | 3  | R.EAEAIIHLQLFEELR.R                                                 |
| *           | HsFlag-VPS71_Ti_10 | 3.4427 | 0.2051 | 2331.83 | 2332.616 | 4557.7  | 1 | 393.1  | 40.9 | 1  | R.RLAPITSDPTEATAVGAVEASFK.C                                         |
| *           | HsFLAG-ARP6_Ti_1   | 5.6955 | 0.4802 | 2176.2  | 2176.428 | 5237.7  | 1 | 1816.2 | 73.8 | 7  | R.LAPITSDPTEATAVGAVEASFK.C                                          |
|             | HsFLAG-KIAA0515_   | 1.8576 | 0.0812 | 840.79  | 841.041  | 3029.5  | 1 | 189.9  | 64.3 | 2  | R.APIIAVTR.N                                                        |
|             | HsFlag-VPS71_Ti_10 | 2.9372 | 0.2286 | 1645.57 | 1643.75  | 8996.4  | 1 | 1136.3 | 69.2 | 1  | K.DPVQEAWAEDVDLR.V                                                  |
| gi 5453617  |                    | 10     | 44     | 42.90%  | 154      | 17536   |   |        |      |    | 9.4 zinc finger, HIT domain containing 1 [Homo sapiens]             |
| *           | HsFLAG-TIP49a_Ti_  | 4.1765 | 0.343  | 2551.01 | 2550.744 | 7129.8  | 1 | 634.8  | 28.4 | 2  | R.QLEALEDNFQDDPHAGLPQLGK.R                                          |
| *           | HsFlag-VPS71_Ti_10 | 4.3684 | 0.3034 | 2551.11 | 2550.744 | 4452    | 1 | 457.1  | 45.5 | 11 | R.QLEALEDNFQDDPHAGLPQLGK.R                                          |
| *           | HsH2AZ-FLAG_293_   | 4.8242 | 0.2674 | 2706.67 | 2706.932 | 9255.7  | 1 | 1037.9 | 29.3 | 2  | R.QLEALEDNFQDDPHAGLPQLGK.L                                          |
| *           | HsFlag-VPS71_Ti_10 | 4.0653 | 0.2459 | 1479.87 | 1478.558 | 5961.3  | 1 | 1585.9 | 83.3 | 8  | K.RLPQFDDADTGK.K                                                    |
| *           | HsVPS71-FLAG_Ti_   | 4.7803 | 0.3728 | 1607.57 | 1606.732 | 5674.6  | 1 | 1578.6 | 84.6 | 12 | K.RLPQFDDADTGK.K                                                    |
| *           | HsFlag-VPS71_Ti_10 | 5.1109 | 0.1762 | 1607.8  | 1606.732 | 6083.1  | 1 | 1575.9 | 55.8 | 3  | K.RLPQFDDADTGK.K                                                    |
| *           | HsVPS71-FLAG_Ti_   | 2.8153 | 0.3248 | 1323.54 | 1322.371 | 6240.9  | 1 | 1336.9 | 86.4 | 2  | R.LPQFDDADTGK.K                                                     |
| *           | HsVPS71-FLAG_Ti_   | 3.5786 | 0.2386 | 1450.63 | 1450.545 | 8109    | 1 | 1079.3 | 66.7 | 2  | R.LPQFDDADTGK.K                                                     |
| *           | HsFLAG-TIP49b_Ti_  | 4.4627 | 0.3825 | 2294.42 | 2294.433 | 5740.6  | 1 | 1094.4 | 60.5 | 1  | R.PFCAVCGFSPYTCVSCGAR.Y                                             |
| *           | HsFlag-VPS71_Ti_10 | 2.345  | 0.2125 | 1101.67 | 1102.158 | 3327.6  | 1 | 232.2  | 75   | 1  | R.CLGTHQETR.C                                                       |
| gi 7657381  |                    | 12     | 66     | 42.50%  | 504      | 55181   |   |        |      |    | 6.6 PRP19/PSO4 pre-mRNA processing factor 19 homolog [Homo sapiens] |
| *           | HsFLAG-p53-DNA-D   | 3.18   | 0.1432 | 2715.28 | 2715.974 | 7392.7  | 1 | 595.3  | 37   | 1  | K.YIAENGTDPINNQLPSEEQLIDIK.V                                        |
| *           | HsFLAG-p53-DNA-D   | 5.0571 | 0.3776 | 2033.43 | 2033.309 | 7930.6  | 1 | 1184.1 | 59.4 | 6  | K.ALQDEWDVAMLSHFTLR.Q                                               |
| *           | HsFLAG-FLJ20729_   | 3.768  | 0.4305 | 1799.4  | 1799.907 | 8518.6  | 1 | 1164.9 | 64.3 | 14 | R.QELSHALYQHDAACR.V                                                 |
| *           | HsFlag-NUFIP_Ti_20 | 2.9351 | 0.0948 | 1601.69 | 1598.834 | 4031.3  | 1 | 344.6  | 57.7 | 6  | K.TVPEELVKPEELSK.Y                                                  |

|                 |                    |        |        |         |          |         |   |        |      |                                                                  |
|-----------------|--------------------|--------|--------|---------|----------|---------|---|--------|------|------------------------------------------------------------------|
| *               | HsFlag-NUFIP_Ti_2C | 4.4114 | 0.2967 | 2901.82 | 2902.243 | 11046.6 | 1 | 1097.7 | 27.8 | 3 R.QVASHVGLHSASIPGILALDLCPSDTNK.I                               |
| *               | HsFLAG-p53-DNA-D   | 4.9665 | 0.3524 | 2602.11 | 2602.95  | 9410.9  | 1 | 2025.1 | 38   | 7 K.KVTSVVFHPSQDLVFSASPDATIR.I                                   |
| *               | HsFlag-NUFIP_Ti_2C | 5.2905 | 0.4184 | 2473.76 | 2474.776 | 4408    | 1 | 791.1  | 52.3 | 9 K.VTSVVFHPSQDLVFSASPDATIR.I                                    |
| *               | HsFlag-NUFIP_Ti_2C | 3.9097 | 0.1983 | 2475.57 | 2474.776 | 8024.9  | 3 | 696.8  | 29.5 | 2 K.VTSVVFHPSQDLVFSASPDATIR.I                                    |
| *               | HsFLAG-Lin9_Ti_20  | 3.4797 | 0.338  | 1615.74 | 1615.839 | 3840.8  | 1 | 603.9  | 73.1 | 10 R.IWSVPNASCVQVVR.A                                            |
| *               | HsFlag-NUFIP_Ti_2C | 3.8357 | 0.3013 | 3475.35 | 3475.738 | 8256.7  | 1 | 978.3  | 25   | 1 K.VTDETSGCSLTCAQFHPDGLIFGTGTMSQIK.I                            |
| *               | HsFlag-NUFIP_Ti_2C | 6.1909 | 0.3472 | 3604.6  | 3603.88  | 11201.5 | 1 | 1480.5 | 25.7 | 5 R.TNVANFPGHSGPITSIAFSENGYLLATAADDSSVK.L                        |
| *               | HsFlag-NUFIP_Ti_2C | 3.8413 | 0.2399 | 1320.94 | 1321.473 | 7248.9  | 2 | 1356.4 | 85   | 2 K.TLQLDNNFEVK.S                                                |
| gij 10835063 re | 13                 | 138    | 42.50% | 294     | 32575    |         |   |        |      | 4.8 nucleophosmin 1 isoform 1 [Homo sapiens]                     |
| gij 40353734 re | 13                 | 138    | 47.20% | 265     | 29465    |         |   |        |      | 4.6 nucleophosmin 1 isoform 2 [Homo sapiens]                     |
|                 | HsFLAG-ARP5_Ti_1   | 5.1118 | 0.3152 | 2573.97 | 2574.726 | 8825.2  | 1 | 1338.7 | 38.8 | 2 K.ADKDYHFKVDNDENEHQLSLR.T                                      |
|                 | HsH2AZ-FLAG_293_   | 3.9554 | 0.3085 | 2260.89 | 2260.384 | 7768.7  | 1 | 1491   | 47.1 | 1 K.DYHFKVDNDENEHQLSLR.T                                         |
|                 | HsFLAG-p53-DNA-D   | 5.4611 | 0.3233 | 2261.19 | 2260.384 | 9169    | 1 | 2091.2 | 70.6 | 5 K.DYHFKVDNDENEHQLSLR.T                                         |
|                 | HsFlag-VPS71_Ti_1C | 2.4938 | 0.2372 | 1568.62 | 1569.628 | 5358.7  | 3 | 306.9  | 45.8 | 2 K.VDNDENEHQLSLR.T                                              |
|                 | HsFLAG-p53-DNA-D   | 3.9301 | 0.3163 | 1569.6  | 1569.628 | 10906.1 | 1 | 1067.5 | 62.5 | 17 K.VDNDENEHQLSLR.T                                             |
|                 | HsFLAG-p53-DNA-D   | 5.7756 | 0.4204 | 2930.96 | 2931.287 | 10844.9 | 1 | 1469.7 | 40.7 | 4 R.TVSLGAGAKDELHIVEAEAMNYEGSPIK.V                               |
|                 | HsFlag-VPS71_Ti_1C | 6.6085 | 0.3152 | 2931.25 | 2931.287 | 12352.1 | 1 | 2636.9 | 34.3 | 20 R.TVSLGAGAKDELHIVEAEAMNYEGSPIK.V                              |
|                 | HsFLAG-FLJ20729_   | 4.7012 | 0.2618 | 2145.95 | 2146.377 | 7356    | 1 | 1445.4 | 58.3 | 1 K.DELHIVEAEAMNYEGSPIK.V                                        |
|                 | HsFlag-NUFIP_Ti_2C | 5.0046 | 0.3682 | 2228.96 | 2228.655 | 7564.4  | 1 | 970    | 50   | 49 K.MSVQPTVSLGGFEITPPVLR.L                                      |
|                 | HsFlag-VPS71_Ti_1C | 4.561  | 0.2731 | 2229.08 | 2228.655 | 6095.4  | 2 | 822.8  | 36.2 | 3 K.MSVQPTVSLGGFEITPPVLR.L                                       |
|                 | HsVPS71-FLAG_Ti_1  | 6.534  | 0.4967 | 3725.63 | 3725.288 | 10538.8 | 1 | 2755.2 | 33.9 | 6 K.LAAEDDDDDDEEDDDDDDDDFDDEEAEEK.A                              |
|                 | HsFLAG-TCF3_Ti_1C  | 2.9034 | 0.2619 | 933.35  | 932.018  | 9077.3  | 8 | 1145.5 | 81.2 | 2 K.GPSSVEDIK.A                                                  |
|                 | HsFLAG-FLJ20729_   | 4.7746 | 0.2209 | 1820.16 | 1821.017 | 7298.9  | 1 | 1976   | 76.9 | 26 R.MTDQEAIDLWQWR.K                                             |
| gij 5453854 re  | 9                  | 58     | 42.40% | 356     | 37526    |         |   |        |      | 7.1 poly(rC) binding protein 1 [Homo sapiens]                    |
|                 | HsARP6-FLAG_Ti_1   | 3.1504 | 0.1495 | 1290.13 | 1289.354 | 6671.6  | 3 | 866.9  | 70   | 1 R.INISEGNCPER.I                                                |
| *               | HsTIP60_Ti_106.263 | 2.6537 | 0.1144 | 1388.55 | 1389.678 | 8084.1  | 7 | 523.9  | 54.2 | 2 R.IITLTGPTNAIFK.A                                              |
| *               | HsMRGBP-FLAG_Ti_1  | 3.7983 | 0.217  | 1389.58 | 1389.678 | 5660.5  | 2 | 701.6  | 66.7 | 24 R.IITLTGPTNAIFK.A                                             |
| *               | HsFlag-VPS71_Ti_1C | 4.0523 | 0.1808 | 3382.6  | 3380.856 | 7663.7  | 1 | 1190.1 | 28.3 | 3 K.AFAMIIDKLEEDINSSMTNSTAASRPPVTLR.L                            |
| *               | HsFlag-VPS71_Ti_1C | 3.8784 | 0.431  | 1444.36 | 1443.693 | 4458.4  | 2 | 453.6  | 65.4 | 9 R.LVVPATQCGSLIGK.G                                             |
|                 | HsFLAG-Lin9_Ti_20  | 4.6761 | 0.4043 | 2089.82 | 2091.257 | 7514.3  | 1 | 1044   | 52.6 | 7 R.ESTGAQVQVAGDMLPNSTER.A                                       |
| *               | HsFLAG-FLJ20729_   | 3.1247 | 0.3733 | 1674.49 | 1673.913 | 3404.1  | 1 | 470.6  | 63.3 | 5 R.AITIAGVPQSVTECVK.Q                                           |
| *               | HsFlag-NUFIP_Ti_2C | 3.5963 | 0.296  | 2607.96 | 2607.875 | 8753.5  | 1 | 974.5  | 29.2 | 1 R.QQSHFAMMHGGTGTFAGIDSSSPEVK.G                                 |
| *               | HsFlag-VPS71_Ti_1C | 5.0623 | 0.5064 | 2178.51 | 2178.494 | 7193    | 1 | 1219.7 | 57.5 | 6 R.QVTITGSAASISLAQYLINAR.L                                      |
| gij 4501955 re  | 39                 | 253    | 42.30% | 1014    | 113135   |         |   |        |      | 8.9 poly (ADP-ribose) polymerase family, member 1 [Homo sapiens] |
| *               | HsFLAG-FLJ20729_   | 3.6535 | 0.2828 | 1455.06 | 1455.788 | 7660.4  | 2 | 1124.8 | 66.7 | 1 R.MAIMVQSPMFDGK.V                                              |
| *               | HsFLAG-FLJ20729_   | 2.6879 | 0.36   | 1185.27 | 1186.307 | 8438.5  | 1 | 725.4  | 65   | 4 K.TLGDFAAEYAK.S                                                |
| *               | HsFLAG-p53-DNA-D   | 3.7407 | 0.3835 | 1186.34 | 1186.307 | 3761.1  | 1 | 1098.6 | 90   | 7 K.TLGDFAAEYAK.S                                                |
| *               | HsFLAG-p53-DNA-D   | 1.9552 | 0.1411 | 1193.3  | 1194.344 | 5089.3  | 7 | 373.3  | 62.5 | 1 R.WYHPGCFVK.N                                                  |
| *               | HsFLAG-p53-DNA-D   | 4.4173 | 0.2913 | 2025.24 | 2025.228 | 5811.6  | 8 | 578.8  | 37.5 | 2 K.NREELGFRPEYSASQLK.G                                          |
| *               | HsFLAG-p53-DNA-D   | 3.551  | 0.2959 | 2025.69 | 2025.228 | 4939.7  | 1 | 397.5  | 53.1 | 8 K.NREELGFRPEYSASQLK.G                                          |
| *               | HsFLAG-p53-DNA-D   | 2.5424 | 0.2622 | 1080.4  | 1081.211 | 6238.8  | 9 | 457.4  | 61.1 | 1 K.GFSLLATEDK.E                                                 |
| *               | HsFLAG-Lin9_Ti_20  | 3.2508 | 0.2325 | 1081.27 | 1081.211 | 7742.7  | 1 | 1290.9 | 83.3 | 1 K.GFSLLATEDK.E                                                 |
| *               | HsFLAG-ARP5_Ti_1   | 4.724  | 0.3736 | 1650.21 | 1650.913 | 7703.1  | 1 | 1995   | 78.6 | 5 K.GFSLLATEDKEALKK.Q                                            |

|                |                   |        |        |         |          |         |   |        |      |    |                                                                     |
|----------------|-------------------|--------|--------|---------|----------|---------|---|--------|------|----|---------------------------------------------------------------------|
| *              | HsFLAG-p53-DNA-D  | 4.0503 | 0.1991 | 1517.52 | 1517.636 | 7271.6  | 1 | 1015.4 | 65.4 | 7  | K.RKGDEVDPVDEVAK.K                                                  |
| *              | HsFLAG-FLJ20729_  | 4.1024 | 0.3401 | 1702.16 | 1700.932 | 5300.2  | 1 | 754.7  | 65.4 | 2  | K.AQNDLIWNIKDELK.K                                                  |
| *              | HsFLAG-p53-DNA-D  | 3.5792 | 0.2951 | 1828.14 | 1829.106 | 8292.8  | 1 | 954.8  | 60.7 | 1  | K.AQNDLIWNIKDELKK.V                                                 |
| *              | HsARP6-FLAG_Ti_1  | 2.5558 | 0.251  | 1401.17 | 1400.531 | 5598.8  | 4 | 431    | 58.3 | 2  | K.QQVPSGESAILDR.V                                                   |
| *              | HsFlag-VPS71_Ti_1 | 3.954  | 0.2854 | 2529.5  | 2528.855 | 3833.5  | 1 | 420.8  | 43.2 | 1  | R.VADGMVFGALLPCEECSSGQLVFK.S                                        |
| *              | HsFLAG-FLJ20729_  | 4.5121 | 0.4899 | 1738.18 | 1738.814 | 8245.2  | 1 | 2045.8 | 78.6 | 4  | K.SDAYYCTGDVTAWTK.C                                                 |
| *              | HsFLAG-p53-DNA-D  | 5.0483 | 0.4315 | 3768.28 | 3770.203 | 5964.3  | 1 | 778.5  | 25   | 2  | R.IFPSETSASVAATPPPSTASAPAAVNSSASADKPLSNMK.I                         |
| *              | HsFLAG-Lin9_Ti_20 | 5.5069 | 0.4786 | 1625.4  | 1625.773 | 8928    | 1 | 2219.1 | 78.6 | 22 | R.VVSEDFLQDVSASTK.S                                                 |
| *              | HsFlag-NUFIP_Ti_1 | 6.346  | 0.4733 | 2138.73 | 2139.502 | 8174.5  | 1 | 1912   | 66.7 | 33 | K.SLQELFLAHILSPWGAEVK.A                                             |
| *              | HsFLAG-Lin9_Ti_20 | 5.5545 | 0.1908 | 2139.65 | 2139.502 | 6952.5  | 1 | 1704.7 | 45.8 | 20 | K.SLQELFLAHILSPWGAEVK.A                                             |
| *              | HsFLAG-p53-DNA-D  | 6.1643 | 0.4481 | 3187.91 | 3187.709 | 10410.1 | 1 | 1581.4 | 31.2 | 1  | K.SLQELFLAHILSPWGAEVKAEPVEVVAPR.G                                   |
| *              | HsFLAG-Lin9_Ti_20 | 2.8942 | 0.1523 | 1066.98 | 1067.23  | 3827.8  | 2 | 463.8  | 72.2 | 2  | K.AEPVEVVAPR.G                                                      |
| *              | HsFLAG-p53-DNA-D  | 4.5578 | 0.4005 | 1990.47 | 1990.137 | 7125.4  | 1 | 1187.6 | 60.5 | 4  | K.GGAAVDPDPSGLEHSAHVLEK.G                                           |
| *              | HsARP6-FLAG_Ti_1  | 4.6971 | 0.3151 | 1363.52 | 1362.652 | 5321.1  | 1 | 1585.1 | 91.7 | 15 | K.VFSATLGLVDIVK.G                                                   |
| *              | HsFlag-VPS71_Ti_1 | 5.3597 | 0.3588 | 2044.91 | 2045.253 | 6390.7  | 1 | 2114.6 | 81.2 | 19 | K.KFYPLEIDYGGDEEAVK.K                                               |
| *              | HsFLAG-Lin9_Ti_20 | 3.9523 | 0.2273 | 2044.99 | 2045.253 | 5340.5  | 2 | 839.9  | 42.2 | 1  | K.KFYPLEIDYGGDEEAVK.K                                               |
| *              | HsFLAG-p53-DNA-D  | 4.6091 | 0.3122 | 2172.65 | 2173.427 | 8538.9  | 1 | 1969.7 | 67.6 | 1  | K.KFYPLEIDYGGDEEAVKK.L                                              |
| *              | HsFLAG-p53-DNA-D  | 4.464  | 0.2787 | 2173.25 | 2173.427 | 6797.1  | 1 | 1365.8 | 44.1 | 2  | K.KFYPLEIDYGGDEEAVKK.L                                              |
| *              | HsFLAG-p53-DNA-D  | 2.1174 | 0.2507 | 957.53  | 958.146  | 4409.1  | 3 | 373    | 68.8 | 5  | K.KLTVNPGTK.S                                                       |
| *              | HsFLAG-p53-DNA-D  | 3.0281 | 0.1668 | 1366.52 | 1366.687 | 4297.9  | 1 | 568.9  | 72.7 | 3  | K.KSLPKPVQDLIK.M                                                    |
| *              | HsFLAG-p53-DNA-D  | 6.4772 | 0.423  | 3493.88 | 3493.812 | 9932.9  | 1 | 1994.3 | 33.9 | 14 | K.RQIQAAYSILSEVQQAVSQGSSDSQILDLSNR.F                                |
| *              | HsFLAG-p53-DNA-D  | 6.3012 | 0.3302 | 3338.62 | 3337.625 | 9343.9  | 1 | 1756.5 | 33.3 | 5  | R.QIQAAYSILSEVQQAVSQGSSDSQILDLSNR.F                                 |
| *              | HsFlag-NUFIP_Ti_1 | 3.2731 | 0.2714 | 1468.91 | 1469.741 | 5621    | 6 | 410.2  | 59.1 | 8  | R.FYTLIPHDFGMK.K                                                    |
| *              | HsFLAG-FLJ20309_  | 4.0038 | 0.3344 | 1495.34 | 1495.719 | 4968.8  | 1 | 1016.9 | 80.8 | 21 | K.KPPLLNNADSVQAK.V                                                  |
| *              | HsFLAG-p53-DNA-D  | 5.4667 | 0.4344 | 2107.05 | 2107.47  | 8754.2  | 1 | 1942.2 | 67.6 | 5  | K.VEMLDNLLDIEVAYSLLR.G                                              |
| *              | HsFLAG-p53-DNA-D  | 5.3189 | 0.4267 | 1826.23 | 1826.868 | 5529.9  | 1 | 1293.5 | 68.8 | 1  | R.GGSDDSSKDPIDVNYEK.L                                               |
| *              | HsFLAG-p53-DNA-D  | 3.7162 | 0.0955 | 1531.72 | 1531.663 | 9109.8  | 3 | 1414.9 | 70.8 | 1  | K.VVDRDSEEAIEIR.K                                                   |
| *              | HsFLAG-FLJ20729_  | 2.5344 | 0.1721 | 1660.71 | 1659.837 | 5126.7  | 1 | 508.7  | 61.5 | 1  | K.VVDRDSEEAIEIR.K                                                   |
| *              | HsFLAG-FLJ20729_  | 4.599  | 0.3711 | 1378.43 | 1378.571 | 7563.4  | 1 | 1653.6 | 83.3 | 18 | R.TTNFAGILSQGLR.I                                                   |
| *              | HsFLAG-p53-DNA-D  | 2.6896 | 0.2403 | 1130.4  | 1131.332 | 8274.2  | 1 | 949.1  | 72.2 | 2  | K.GIYFADMVSK.S                                                      |
| gij 4503481 re |                   | 16     | 80     | 42.10%  | 437      | 50119   |   |        |      |    | 6.7 eukaryotic translation elongation factor 1 gamma [Homo sapiens] |
| *              | HsFlag-VPS71_Ti_1 | 4.9977 | 0.4196 | 1348.38 | 1348.545 | 8345    | 1 | 2199.4 | 83.3 | 3  | K.ALIAAQYSGAQVR.V                                                   |
| *              | HsFlag-VPS71_Ti_1 | 3.4037 | 0.1264 | 1119.44 | 1119.39  | 3273.9  | 3 | 755.9  | 88.9 | 2  | R.ILGLLDAYLK.T                                                      |
| *              | HsFLAG-FLJ20729_  | 3.6858 | 0.4155 | 2008.51 | 2009.403 | 8371.3  | 1 | 801    | 53.1 | 2  | R.VTLADITVVCTLLWLKY.K                                               |
| *              | HsFlag-VPS71_Ti_1 | 4.1316 | 0.3    | 1609.89 | 1610.822 | 6576.4  | 1 | 1586.8 | 81.8 | 8  | R.WFLTICINQPQFR.A                                                   |
| *              | HsFLAG-ARP6_Ti_1  | 5.1437 | 0.4402 | 2357.31 | 2358.502 | 5626.3  | 1 | 808.9  | 54.8 | 7  | K.AAAPAPEEEMDECEQALAAEPK.A                                          |
| *              | HsFlag-VPS71_Ti_1 | 2.9486 | 0.1479 | 925.31  | 925.075  | 3563.8  | 5 | 747.7  | 92.9 | 5  | K.DPFAHLPK.S                                                        |
| *              | HsFlag-VPS71_Ti_1 | 2.5267 | 0.1651 | 1085.55 | 1086.23  | 8691    | 1 | 672.5  | 68.8 | 1  | K.STFVLDEFK.R                                                       |
| *              | HsFlag-VPS71_Ti_1 | 2.9035 | 0.1986 | 1086.69 | 1086.23  | 4856.4  | 1 | 775.4  | 81.2 | 2  | K.STFVLDEFK.R                                                       |
| *              | HsFLAG-p53-DNA-D  | 2.7754 | 0.1934 | 1242.55 | 1242.417 | 6681.3  | 2 | 777.8  | 72.2 | 1  | K.STFVLDEFK.R                                                       |
| *              | HsFLAG-BC014022_  | 3.9502 | 0.282  | 2589.47 | 2590.851 | 5166.6  | 4 | 422.8  | 30   | 1  | R.KYSNEDTLSVALPYFWEHFDK.D                                           |
| *              | HsFLAG-ARP6_Ti_1  | 4.4679 | 0.4029 | 2461.6  | 2462.677 | 7024.2  | 1 | 1335.3 | 42.1 | 6  | K.YSNEDTLSVALPYFWEHFDK.D                                            |
| *              | HsFlag-FLJ90652_2 | 4.4263 | 0.3159 | 2462.93 | 2462.677 | 5650.2  | 1 | 593.6  | 44.7 | 12 | K.YSNEDTLSVALPYFWEHFDK.D                                            |

|                |                     |        |        |         |          |                                                                        |   |        |      |                                            |
|----------------|---------------------|--------|--------|---------|----------|------------------------------------------------------------------------|---|--------|------|--------------------------------------------|
|                | HsFlag-VPS71_Ti_10  | 5.2782 | 0.5543 | 2550.96 | 2551.901 | 8541.5                                                                 | 1 | 1415.9 | 55   | 6 R.FPEELTQTFMSCNLTGMFQR.L                 |
|                | HsFLAG-ARP6_Ti_1    | 4.8393 | 0.3873 | 2688.59 | 2688.912 | 4725.7                                                                 | 1 | 619.2  | 50   | 15 R.GQELAFPLSPDWQVDYESYTW.R.K             |
| *              | HsFlag-VPS71_Ti_10  | 3.8261 | 0.2676 | 1575.15 | 1573.743 | 3332.4                                                                 | 1 | 599.2  | 73.1 | 6 R.KLDPGSEETQTLVR.E                       |
|                | HsFlag-VPS71_Ti_10  | 3.7857 | 0.2408 | 1686.62 | 1685.836 | 7272.8                                                                 | 1 | 1255.3 | 69.2 | 3 R.EYFSWEGAFQHV.GK.A                      |
| gij 4507555 re | 17                  | 74     | 41.60% | 694     | 75492    | 7.7 thymopoietin isoform alpha [Homo sapiens]                          |   |        |      |                                            |
|                | HsFLAG-KIAA0515_    | 2.5085 | 0.142  | 1700.23 | 1698.874 | 4238.1                                                                 | 8 | 409.2  | 53.3 | 1 K.SELVANNVTLPAGEQR.K                     |
|                | HsFLAG-p53-DNA-D    | 4.7959 | 0.3471 | 1719.67 | 1719.981 | 7762.8                                                                 | 1 | 1475.9 | 73.1 | 9 K.DVYVQLYLQHLTAR.N                       |
|                | HsFLAG-UTX1_Ti_20   | 3.7274 | 0.3961 | 1252.53 | 1252.416 | 6178.6                                                                 | 1 | 1455   | 81.8 | 21 R.NRPPLPAGTNSK.G                        |
|                | HsFlag-NUFIP_Ti_20  | 5.4352 | 0.4378 | 2571.48 | 2571.72  | 7444.5                                                                 | 1 | 1550   | 36   | 8 K.GPPDFSSDEEREPTVLGSGAAAAGR.S            |
|                | HsFLAG-p53-DNA-D    | 4.1052 | 0.2686 | 2688.36 | 2689.887 | 10107.3                                                                | 1 | 620.4  | 34.1 | 1 R.QEDKDDLDVTELTNEDLLDQLVK.Y              |
|                | HsFlag-les6_293_Ti_ | 4.6388 | 0.3556 | 2190.38 | 2189.378 | 7580                                                                   | 1 | 1027.3 | 55.6 | 3 K.DDLDVTELTNEDLLDQLVK.Y                  |
|                | HsARP6-FLAG_Ti_1    | 3.1637 | 0.357  | 1330.97 | 1331.514 | 3923.2                                                                 | 1 | 937.3  | 75   | 6 K.YGVNPGPIVGTR.K                         |
|                | HsFLAG-FLJ20729_    | 2.5442 | 0.253  | 1647.67 | 1648.767 | 4565.1                                                                 | 1 | 1021.1 | 73.3 | 1 R.SSTPLPTISSAENTR.Q                      |
| *              | HsFlag-VPS71_Ti_10  | 3.9223 | 0.264  | 1287.65 | 1286.384 | 4811.3                                                                 | 1 | 1065.1 | 81.8 | 2 R.SHISDQSPSSK.R                          |
| *              | HsFLAG-Lin9_Ti_20   | 3.8372 | 0.3956 | 2139.9  | 2140.398 | 5555.3                                                                 | 1 | 679.7  | 52.6 | 6 K.ALEESESSQLISPLAQAIR.D                  |
| *              | HsFLAG-FLJ20729_    | 5.1548 | 0.4987 | 2319.16 | 2320.579 | 5094                                                                   | 1 | 937.4  | 54.8 | 3 R.DSGSFVAFQNIPEGSELMSSFAK.T              |
| *              | HsFLAG-Lin9_Ti_20   | 4.8097 | 0.4581 | 1656.17 | 1655.932 | 9066.2                                                                 | 1 | 1390.1 | 63.3 | 5 K.TVVSHSLTTLGLEVAK.Q                     |
| *              | HsFLAG-FLJ20729_    | 3.2818 | 0.296  | 1832.58 | 1834.079 | 6157.9                                                                 | 1 | 526    | 50   | 2 K.IDASELSFPFHESILK.V                     |
| *              | HsFLAG-Lin9_Ti_20   | 3.9152 | 0.2627 | 3896.11 | 3894.214 | 5283.3                                                                 | 1 | 800.1  | 27.1 | 1 K.VDDEILGFISEATPLGGIQAASTESCQNQLDLALCR.A |
| *              | HsFlag-VPS71_Ti_10  | 4.8072 | 0.3955 | 2035.02 | 2035.307 | 8769.9                                                                 | 1 | 1831.3 | 60.5 | 2 R.AYEAASALQIATHTAFVAK.A                  |
| *              | HsFLAG-Lin9_Ti_20   | 2.6037 | 0.2344 | 1067.54 | 1068.261 | 5694.6                                                                 | 1 | 832.8  | 77.8 | 2 R.THQALGILSK.T                           |
| *              | HsFLAG-FLJ20309_    | 3.1718 | 0.3494 | 1953.95 | 1954.063 | 9711.3                                                                 | 1 | 731.3  | 50   | 1 K.TYDAASYICEAAFDEVK.M                    |
| gij 21040371 r | 20                  | 70     | 41.50% | 427     | 49130    | 5.7 DEAD (Asp-Glu-Ala-Asp) box polypeptide 39 isoform 1 [Homo sapiens] |   |        |      |                                            |
|                | HsFLAG-Lin9_Ti_20   | 3.0073 | 0.2799 | 1296.63 | 1297.413 | 4711.8                                                                 | 2 | 221.9  | 54.5 | 3 K.GSYVSIHSSGFR.D                         |
|                | HsFLAG-FLJ20729_    | 3.6241 | 0.3653 | 1296.99 | 1297.413 | 6359.8                                                                 | 1 | 982    | 72.7 | 7 K.GSYVSIHSSGFR.D                         |
|                | HsFLAG-Lin9_Ti_20   | 2.6521 | 0.1748 | 1243.61 | 1244.52  | 3979.5                                                                 | 1 | 468.9  | 77.8 | 1 R.DFLLKPELLR.A                           |
|                | HsFlag-NUFIP_Ti_10  | 3.2269 | 0.1338 | 1244.76 | 1244.52  | 4710.6                                                                 | 2 | 906.8  | 83.3 | 2 R.DFLLKPELLR.A                           |
|                | HsFLAG-FLJ20729_    | 6.4447 | 0.4235 | 3653    | 3654.027 | 6880.9                                                                 | 1 | 1503.5 | 33.1 | 11 R.AIVDCGFEPHSEVQHECIPQAILGMDVLCQAK.S    |
|                | HsFLAG-Lin9_Ti_20   | 3.0334 | 0.2796 | 1292.53 | 1293.434 | 4011                                                                   | 1 | 344.4  | 68.2 | 1 K.NCPHVVVGTPGR.I                         |
|                | HsFLAG-Lin9_Ti_20   | 3.7331 | 0.4048 | 1294.37 | 1293.434 | 7962.6                                                                 | 1 | 1293.8 | 72.7 | 4 K.NCPHVVVGTPGR.I                         |
|                | HsFLAG-Lin9_Ti_20   | 2.974  | 0.2034 | 1162.4  | 1163.238 | 5671.2                                                                 | 2 | 798.3  | 81.2 | 1 K.HFVLDECCK.M                            |
| *              | HsFlag-VPS71_Ti_10  | 3.1569 | 0.3406 | 1832.46 | 1832.05  | 5669.5                                                                 | 1 | 804.6  | 64.3 | 1 K.FMQDPMVEFVDDETK.L                      |
|                | HsFLAG-Lin9_Ti_20   | 3.2061 | 0.3726 | 1462.54 | 1463.72  | 5019                                                                   | 2 | 426    | 59.1 | 2 K.LTLHGLQQYYVK.L                         |
|                | HsFLAG-Lin9_Ti_20   | 3.5535 | 0.2277 | 1462.54 | 1463.72  | 6395.9                                                                 | 1 | 1144.6 | 54.5 | 1 K.LTLHGLQQYYVK.L                         |
|                | HsFLAG-p53-DNA-D    | 3.4387 | 0.3284 | 1464.78 | 1463.72  | 6416.1                                                                 | 1 | 1051.3 | 77.3 | 8 K.LTLHGLQQYYVK.L                         |
| *              | HsFLAG-Lin9_Ti_20   | 4.3755 | 0.4408 | 2294.69 | 2296.702 | 8589.3                                                                 | 1 | 1289.9 | 52.6 | 2 R.CMALAQLLVEQNFPFAIAIHR.G                |
| *              | HsFLAG-FLJ20729_    | 4.5924 | 0.3713 | 2296.48 | 2296.702 | 7131.2                                                                 | 1 | 750.3  | 32.9 | 2 R.CMALAQLLVEQNFPFAIAIHR.G                |
|                | HsFLAG-FLJ20729_    | 3.868  | 0.3173 | 1260.58 | 1260.525 | 6371.3                                                                 | 1 | 891.1  | 75   | 4 R.RILVATNLFGR.G                          |
|                | HsFLAG-Lin9_Ti_20   | 2.2326 | 0.1198 | 1104.68 | 1104.338 | 5498.1                                                                 | 2 | 339.8  | 66.7 | 2 R.ILVATNLFGR.G                           |
|                | HsFLAG-Lin9_Ti_20   | 3.4027 | 0.2346 | 1105.14 | 1104.338 | 6349.5                                                                 | 1 | 1134.3 | 83.3 | 7 R.ILVATNLFGR.G                           |
|                | HsFLAG-Lin9_Ti_20   | 4.8327 | 0.4231 | 1480.33 | 1480.615 | 7594.8                                                                 | 1 | 2068.7 | 84.6 | 6 K.GLAITFVSDENDAK.I                       |
|                | HsFLAG-Lin9_Ti_20   | 3.7762 | 0.3725 | 1480.73 | 1480.615 | 8409.7                                                                 | 1 | 923.6  | 61.5 | 4 K.GLAITFVSDENDAK.I                       |
| *              | HsFLAG-Lin9_Ti_20   | 4.3415 | 0.221  | 3535.32 | 3536.874 | 9513.3                                                                 | 1 | 1483   | 28.4 | 1 K.ILNDVQDRFEVNVVAELPEEIDISTYIEQSR.-      |



|               |                    |        |        |         |          |                                                             |   |        |      |                                              |
|---------------|--------------------|--------|--------|---------|----------|-------------------------------------------------------------|---|--------|------|----------------------------------------------|
| gi 4758138 re | 22                 | 94     | 41.40% | 614     | 69148    | 8.9 DEAD (Asp-Glu-Ala-Asp) box polypeptide 5 [Homo sapiens] |   |        |      |                                              |
| *             | HsFlag-DPCD_Ti_20  | 3.2958 | 0.2532 | 1419.54 | 1419.62  | 7432                                                        | 1 | 1293.9 | 85   | 1 K.WNLDELPKFEK.N                            |
| *             | HsFlag-NUFIP_Ti_20 | 3.8621 | 0.3098 | 1390.29 | 1390.498 | 7384.4                                                      | 1 | 1283.7 | 80   | 9 K.NFYQEHPDLAR.R                            |
| *             | HsFLAG-FLJ20309_   | 3.2958 | 0.2603 | 1253.38 | 1253.357 | 9365.4                                                      | 1 | 1605.9 | 88.9 | 3 R.RTAQEVETYR.R                             |
| *             | HsFLAG-FLJ20729_   | 3.9676 | 0.3743 | 2280.75 | 2281.634 | 6402.9                                                      | 1 | 748.3  | 50   | 1 K.PVLNFYEANFPANVMDVIAR.Q                   |
| *             | HsFlag-DPCD_Ti_20  | 5.6373 | 0.4736 | 3360.23 | 3360.766 | 9553.9                                                      | 1 | 1579.7 | 30.5 | 2 R.QNFTEPTAIQAQGWVVALSGLDMVGVAQTGSGK.T      |
|               | HsFLAG-FLJ20729_   | 3.68   | 0.1617 | 1369.4  | 1369.57  | 8205                                                        | 1 | 1337   | 70.8 | 10 R.GDGPICLVLAPTR.E                         |
| *             | HsFLAG-Lin9_Ti_20  | 5.4316 | 0.3968 | 1793.46 | 1793.94  | 9690.1                                                      | 1 | 2098.9 | 75   | 8 R.ELAQQVQQVAAEYCR.A                        |
|               | HsFLAG-Lin9_Ti_20  | 3.4493 | 0.2586 | 1173.24 | 1173.321 | 5889.8                                                      | 4 | 1103.1 | 80   | 1 R.GVEICIATPGR.L                            |
| *             | HsFLAG-Lin9_Ti_20  | 2.3909 | 0.2523 | 1094.49 | 1095.247 | 6275.4                                                      | 3 | 584.4  | 68.8 | 2 R.LIDFLECGK.T                              |
| *             | HsFLAG-Lin9_Ti_20  | 3.2364 | 0.2181 | 1095.22 | 1095.247 | 3521.4                                                      | 2 | 696.4  | 87.5 | 1 R.LIDFLECGK.T                              |
|               | HsFlag-VPS71_Ti_10 | 3.9446 | 0.3609 | 1338.59 | 1337.595 | 6421.6                                                      | 1 | 1768.7 | 90   | 2 R.MLDMGFEPQIR.K                            |
|               | HsFlag-VPS71_Ti_10 | 3.4534 | 0.2605 | 1350.45 | 1349.59  | 5704.3                                                      | 1 | 749    | 80   | 3 R.QTLMWSATWPK.E                            |
| *             | HsFLAG-Lin9_Ti_20  | 4.9428 | 0.3348 | 3818.02 | 3817.213 | 9500.1                                                      | 1 | 1143.8 | 26.6 | 2 K.DYIHINIGALELSANHNILQIVDVCHDVEKDEK.L      |
| *             | HsFlag-DPCD_Ti_20  | 2.5611 | 0.1431 | 1284.29 | 1284.432 | 4219.3                                                      | 2 | 459    | 63.6 | 1 R.DGWPAMGIHGDK.S                           |
| *             | HsFLAG-ARP5_Ti_10  | 3.7464 | 0.4159 | 1549.58 | 1549.814 | 6393                                                        | 1 | 1428.5 | 75   | 2 K.HGKAPILIATDVASR.G                        |
|               | HsFlag-DPCD_Ti_20  | 3.9001 | 0.3219 | 1227.45 | 1227.447 | 6409.8                                                      | 1 | 1340.3 | 81.8 | 24 K.APILIATDVASR.G                          |
|               | HsFLAG-Lin9_Ti_20  | 2.3447 | 0.1664 | 1227.48 | 1227.447 | 4392.5                                                      | 1 | 224.8  | 54.5 | 1 K.APILIATDVASR.G                           |
|               | HsFlag-VPS71_Ti_10 | 3.8816 | 0.4273 | 2082.57 | 2083.39  | 7258                                                        | 1 | 890.5  | 52.6 | 1 K.APILIATDVASRGLDVEDVK.F                   |
|               | HsH2AZ-FLAG_293_   | 2.0551 | 0.157  | 874.29  | 874.966  | 5857.2                                                      | 2 | 691.2  | 78.6 | 1 R.GLDVEDVK.F                               |
| *             | HsFlag-DPCD_Ti_20  | 4.598  | 0.3916 | 2132.41 | 2133.281 | 5941.3                                                      | 1 | 757.7  | 56.2 | 11 K.FVINYDYPNSSEDIHR.I                      |
| *             | HsFLAG-Lin9_Ti_20  | 2.646  | 0.2621 | 1575.74 | 1575.761 | 7983.9                                                      | 1 | 407.6  | 46.2 | 1 K.TGTAYTFFTPNNIK.Q                         |
| *             | HsFlag-VPS71_Ti_10 | 3.8136 | 0.382  | 1576.66 | 1575.761 | 6786.8                                                      | 1 | 825.7  | 61.5 | 7 K.TGTAYTFFTPNNIK.Q                         |
| gi 20127479 r | 35                 | 314    | 41.00% | 930     | 103533   | 6 RNA binding motif protein 10 isoform 1 [Homo sapiens]     |   |        |      |                                              |
| *             | HsMRGBP-FLAG_Ti_10 | 3.3071 | 0.2244 | 2903.8  | 2904.746 | 6719.2                                                      | 1 | 746.5  | 45.5 | 1 R.DQDYRTEQGESEEEEEEEEEEEK.A                |
| *             | HsFLAG-p53-DNA-D   | 5.8565 | 0.3438 | 2226.4  | 2227.075 | 9083.8                                                      | 1 | 2272.7 | 70.6 | 16 R.TEQGESEEEEEEEEEEEK.A                    |
| *             | HsARP6-FLAG_Ti_10  | 3.3562 | 0.2855 | 1360.08 | 1360.525 | 3613.8                                                      | 1 | 612.2  | 81.8 | 4 R.MLPQAATEDDIR.G                           |
|               | HsFLAG-p53-DNA-D   | 2.7401 | 0.1703 | 1180.62 | 1181.297 | 5182.6                                                      | 1 | 516.5  | 70   | 8 R.GQLQSHGVQAR.E                            |
|               | HsFlag-NUFIP_Ti_10 | 3.8075 | 0.3191 | 1181.36 | 1181.297 | 6403.1                                                      | 1 | 1391.2 | 90   | 40 R.GQLQSHGVQAR.E                           |
|               | HsH2AZ-FLAG_293_   | 4.8317 | 0.4558 | 1725.49 | 1725.901 | 8956.4                                                      | 1 | 2071.3 | 78.6 | 39 R.GFAFVEFSLQDATR.W                        |
|               | HsFLAG-p53-DNA-D   | 5.3208 | 0.3142 | 1770.7  | 1770.016 | 9739.7                                                      | 1 | 2077   | 75   | 27 R.WMEANQHSLNILGQK.V                       |
|               | HsFLAG-Lin9_Ti_20  | 2.4237 | 0.2055 | 1288.58 | 1289.492 | 4529.7                                                      | 3 | 535.4  | 70   | 1 K.VSMHYSDPKPK.I                            |
|               | HsFlag-NUFIP_Ti_10 | 2.7225 | 0.1915 | 1289.42 | 1289.492 | 3455.2                                                      | 6 | 481.3  | 75   | 1 K.VSMHYSDPKPK.I                            |
|               | HsARP6-FLAG_Ti_10  | 3.2198 | 0.2221 | 1191.73 | 1192.28  | 7836.4                                                      | 2 | 1294   | 87.5 | 4 K.INEDWLCNK.C                              |
|               | HsH2AZ-FLAG_293_   | 3.5364 | 0.2358 | 1328.72 | 1329.496 | 4905.1                                                      | 1 | 1266.9 | 81.8 | 1 K.SEAQKPLPLGTR.L                           |
|               | HsFLAG-FLJ20729_   | 4.0519 | 0.2898 | 1198.26 | 1198.365 | 5574.7                                                      | 1 | 1133.1 | 90   | 10 R.LDQQTLPLGGR.E                           |
|               | HsFLAG-p53-DNA-D   | 5.1787 | 0.2824 | 2827.99 | 2829.2   | 7493.1                                                      | 1 | 1293.9 | 33.7 | 23 R.NLNPHSTMSILGALAPYAVLSSSNVR.V            |
|               | HsFlag-NUFIP_Ti_10 | 5.7653 | 0.444  | 2828.92 | 2829.2   | 7664.5                                                      | 1 | 1639.8 | 51.9 | 21 R.NLNPHSTMSILGALAPYAVLSSSNVR.V            |
| *             | HsFLAG-Lin9_Ti_20  | 5.7372 | 0.4469 | 3446.71 | 3448.086 | 7035.3                                                      | 1 | 1296   | 30.6 | 2 R.GFAFIQLSTIVEAAQLLQILQALHPPLTIDGK.T       |
|               | HsARP6-FLAG_Ti_10  | 2.1201 | 0.1228 | 921.42  | 922.069  | 7145.1                                                      | 4 | 554.9  | 71.4 | 3 K.TINVEFAK.G                               |
|               | HsFLAG-FLJ20729_   | 4.3579 | 0.4022 | 2534.99 | 2535.701 | 8876                                                        | 1 | 1308.7 | 34   | 2 K.GDPTGAGPEASLEPGADSVSMQAFSR.A             |
|               | HsFlag-FLJ90652_20 | 5.5311 | 0.3203 | 2536.28 | 2535.701 | 5205.1                                                      | 1 | 937.9  | 54   | 12 K.GDPTGAGPEASLEPGADSVSMQAFSR.A            |
|               | HsFLAG-ARP6_Ti_20  | 7.5476 | 0.5384 | 3768.67 | 3770.119 | 11301.2                                                     | 1 | 2813.9 | 31.8 | 8 R.AQPGAAPGIYQQSAEASSSQGTAANSQSYTIMSPAFLK.S |

|                     |        |        |         |          |        |                                                |        |      |                                 |
|---------------------|--------|--------|---------|----------|--------|------------------------------------------------|--------|------|---------------------------------|
| HsFlag-les6_293_Ti_ | 3.9275 | 0.3663 | 1516.18 | 1516.651 | 4696.4 | 1                                              | 800    | 76.9 | 13 R.TYVPALEQSDAGHK.E           |
| HsFLAG-p53-DNA-D    | 4.4336 | 0.3003 | 2187.06 | 2187.371 | 8227.7 | 1                                              | 1028.4 | 52.5 | 1 R.TYVPALEQSDAGHKETGAPSK.E     |
| HsFLAG-ARP5_Ti_1    | 3.7954 | 0.3767 | 2503.21 | 2501.712 | 3932.3 | 1                                              | 829.8  | 39.1 | 2 R.TYVPALEQSDAGHKETGAPSK.E     |
| HsARP6-FLAG_Ti_1    | 2.6535 | 0.1861 | 1149.16 | 1149.292 | 3711.7 | 2                                              | 627.6  | 83.3 | 2 K.NSFQPISSLR.D                |
| HsFlag-DPCD_Ti_20   | 4.2484 | 0.3178 | 1439.35 | 1439.562 | 8141.1 | 1                                              | 2470   | 84.6 | 10 R.ESATADAGYAILEK.K           |
| HsFlag-NUFIP_Ti_20  | 2.9015 | 0.2106 | 1047.48 | 1048.19  | 5598.6 | 1                                              | 512.9  | 75   | 4 R.HQQLSGLHK.Q                 |
| HsFlag-DPCD_Ti_20   | 2.9624 | 0.083  | 1048.03 | 1048.19  | 8150.5 | 8                                              | 743.5  | 75   | 1 R.HQQLSGLHK.Q                 |
| HsFLAG-p53-DNA-D    | 3.8299 | 0.1603 | 1639.61 | 1639.806 | 7054.3 | 1                                              | 1027   | 69.2 | 2 R.RAHLSENELEALEK.N            |
| HsFLAG-Lin9_Ti_20   | 3.4231 | 0.2285 | 1482.79 | 1483.618 | 5679.1 | 1                                              | 724.4  | 62.5 | 1 R.AHLSENELEALEK.N             |
| HsH2AZ-FLAG_293_    | 4.4575 | 0.4333 | 1483.58 | 1483.618 | 5074   | 1                                              | 1377   | 87.5 | 20 R.AHLSENELEALEK.N            |
| HsFLAG-ARP5_Ti_1    | 3.8399 | 0.1632 | 2359.45 | 2360.616 | 4438.1 | 1                                              | 889.6  | 40.8 | 3 R.AHLSENELEALEKNDMEQMK.Y      |
| HsFLAG-p53-DNA-D    | 5.3946 | 0.4197 | 1856.14 | 1857.03  | 6839   | 1                                              | 2051.8 | 75   | 2 R.KYGGISTASVDFEQPTR.D         |
| HsFLAG-Lin9_Ti_20   | 4.5126 | 0.4349 | 1727.96 | 1728.856 | 8285.9 | 1                                              | 1389.9 | 63.3 | 15 K.YGGISTASVDFEQPTR.D         |
| HsH2AZ-FLAG_293_    | 3.1781 | 0.2426 | 1093.12 | 1091.123 | 4757.1 | 1                                              | 780    | 80   | 6 R.DGLGSDNIGSR.M               |
| HsFLAG-FLJ20729_    | 2.5255 | 0.2164 | 1314.49 | 1313.497 | 4499.2 | 3                                              | 442.7  | 63.6 | 1 K.QGIVTPIEAQTR.V              |
| HsFlag-ZnF-HIT2_Ti_ | 3.4101 | 0.4467 | 1366.16 | 1366.424 | 5424   | 1                                              | 1221.5 | 79.2 | 8 R.GSSYGVSTESYK.E              |
| gij 27436946 r      | 30     | 64     | 41.00%  | 664      | 74140  | 7 lamin A/C isoform 1 precursor [Homo sapiens] |        |      |                                 |
| HsFlag-VPS71_Ti_10  | 2.1536 | 0.2683 | 1359.62 | 1360.467 | 4088.3 | 3                                              | 128.4  | 46.2 | 1 R.SGAQASSTPLSPTR.I            |
| HsFlag-VPS71_Ti_10  | 4.1003 | 0.18   | 1360.65 | 1360.467 | 6247   | 1                                              | 928    | 69.2 | 4 R.SGAQASSTPLSPTR.I            |
| HsFLAG-p53-DNA-D    | 4.6882 | 0.2397 | 1630.74 | 1630.752 | 9789   | 1                                              | 2304.5 | 83.3 | 2 R.LQEKEDLQELNDR.L             |
| HsFlag-VPS71_Ti_10  | 3.103  | 0.1755 | 1132.47 | 1132.172 | 6394.6 | 1                                              | 969.7  | 87.5 | 1 K.EDLQELNDR.L                 |
| HsFlag-VPS71_Ti_10  | 3.0851 | 0.2256 | 1090.5  | 1090.178 | 6661.7 | 2                                              | 1241.2 | 88.9 | 2 R.SLETENAGLR.L                |
| HsFlag-VPS71_Ti_10  | 2.2948 | 0.0874 | 1148.57 | 1149.243 | 4221.8 | 9                                              | 281.3  | 61.1 | 1 R.ITESEEVVSR.E                |
| HsFlag-VPS71_Ti_10  | 3.4394 | 0.2194 | 1149.49 | 1149.243 | 6260.5 | 1                                              | 1264   | 88.9 | 4 R.ITESEEVVSR.E                |
| HsFlag-VPS71_Ti_10  | 2.2801 | 0.2719 | 1165.61 | 1166.233 | 4990.3 | 6                                              | 366.9  | 55   | 1 K.AAYEAE LGDAR.K              |
| HsFlag-VPS71_Ti_10  | 3.4773 | 0.2975 | 1172.56 | 1172.327 | 6022.3 | 1                                              | 1386.2 | 90   | 1 K.KEGDLIAAQAR.L               |
| HsFlag-VPS71_Ti_10  | 1.8584 | 0.1021 | 1043.54 | 1044.153 | 2789.8 | 9                                              | 281.9  | 66.7 | 1 K.EGDLIAAQAR.L                |
| HsFlag-VPS71_Ti_10  | 3.1647 | 0.1097 | 1002.63 | 1003.141 | 4922.9 | 4                                              | 523.1  | 75   | 2 K.DLEALLNSK.E                 |
| HsFlag-VPS71_Ti_10  | 2.8896 | 0.2939 | 1120.36 | 1120.245 | 4877.2 | 7                                              | 475.5  | 65   | 1 K.EAALSTALSEK.R               |
| HsFlag-VPS71_Ti_10  | 3.326  | 0.1583 | 1340.68 | 1339.494 | 3277.7 | 4                                              | 490.5  | 75   | 2 K.RTLEGELHDLR.G               |
| HsFlag-VPS71_Ti_10  | 2.1662 | 0.1149 | 901.62  | 902.035  | 6089   | 1                                              | 505    | 62.5 | 1 K.LEAALGEAK.K                 |
| HsFlag-VPS71_Ti_10  | 3.9555 | 0.3264 | 1510.81 | 1510.745 | 7789.7 | 1                                              | 1178.7 | 72.7 | 1 R.LQTMKEELDFQK.N              |
| HsFlag-VPS71_Ti_10  | 1.9905 | 0.125  | 887.49  | 888.009  | 3806.9 | 6                                              | 310.2  | 71.4 | 1 R.LVEIDNGK.Q                  |
| HsFlag-VPS71_Ti_10  | 4.9804 | 0.4732 | 1753.98 | 1753.869 | 5325.1 | 1                                              | 1308.5 | 73.3 | 6 R.NSNLVGAAHEELQQSR.I          |
| HsFlag-VPS71_Ti_10  | 3.9408 | 0.135  | 1701.68 | 1700.976 | 6107.6 | 2                                              | 1229.9 | 48.2 | 2 R.IRIDSLSAQLSQLQK.Q           |
| HsFlag-VPS71_Ti_10  | 5.4745 | 0.3853 | 1701.77 | 1700.976 | 8985.5 | 1                                              | 2218.9 | 78.6 | 6 R.IRIDSLSAQLSQLQK.Q           |
| HsFlag-VPS71_Ti_10  | 2.8258 | 0.2669 | 1430.62 | 1431.629 | 5384.4 | 1                                              | 628.4  | 62.5 | 2 R.IDSLSAQLSQLQK.Q             |
| HsFlag-VPS71_Ti_10  | 4.0817 | 0.19   | 1431.66 | 1431.629 | 8408.4 | 1                                              | 1506.2 | 75   | 2 R.IDSLSAQLSQLQK.Q             |
| HsFlag-VPS71_Ti_10  | 2.5089 | 0.0803 | 1052.86 | 1052.209 | 5177.3 | 7                                              | 686.1  | 85.7 | 1 K.EREMAEMR.A                  |
| HsFLAG-p53-DNA-D    | 4.622  | 0.2877 | 1894.72 | 1895.135 | 8276.9 | 1                                              | 1935.5 | 75   | 4 R.MQQQLDEYQELLDIK.L           |
| HsFlag-VPS71_Ti_10  | 2.9584 | 0.3826 | 1203.49 | 1204.276 | 10934  | 1                                              | 1251.5 | 70   | 2 R.VAVEEVDEEGK.F               |
| HsYL1_Ti_101.1451.  | 3.9583 | 0.3743 | 1204.45 | 1204.276 | 5515.6 | 1                                              | 1476.4 | 90   | 4 R.VAVEEVDEEGK.F               |
| HsFlag-VPS71_Ti_10  | 4.8029 | 0.4061 | 2534.45 | 2534.877 | 7915.1 | 1                                              | 1261   | 47.9 | 4 K.AGQVVTIWAAGAGATHSPPTDLVWK.A |

|               |                    |        |        |         |          |                                                                |   |        |      |    |                                 |
|---------------|--------------------|--------|--------|---------|----------|----------------------------------------------------------------|---|--------|------|----|---------------------------------|
|               | HsFlag-VPS71_Ti_10 | 3.3998 | 0.2348 | 1364.69 | 1364.426 | 5400.3                                                         | 2 | 657.8  | 68.2 | 1  | K.AQNTWGCNLSLR.T                |
|               | HsFlag-VPS71_Ti_10 | 3.7332 | 0.2836 | 1494.76 | 1492.687 | 7803.7                                                         | 1 | 1124.7 | 69.2 | 1  | R.TALINSTGEEVAMR.K              |
|               | HsYL1-FLAG_Ti_202  | 5.3062 | 0.4644 | 2365.71 | 2366.504 | 5597.3                                                         | 1 | 1258.7 | 53.8 | 2  | K.ASASGSGAQVGGPISSGSSASSVTVTR.S |
|               | HsYL1-FLAG_Ti_202  | 3.7677 | 0.4226 | 2367.85 | 2366.504 | 8411.7                                                         | 1 | 1193.6 | 31.7 | 1  | K.ASASGSGAQVGGPISSGSSASSVTVTR.S |
| gj 4506901 re | 7                  | 63     | 40.90% | 164     | 19330    | 11.6 splicing factor, arginine/serine-rich 3 [Homo sapiens]    |   |        |      |    |                                 |
| *             | HsFLAG-ARP6_Ti_2   | 2.8919 | 0.1552 | 1250.82 | 1249.369 | 6620                                                           | 5 | 1030.9 | 72.7 | 1  | K.VYVGNLGNNGNK.T                |
| *             | HsFLAG-p53-DNA-D   | 4.7049 | 0.3335 | 1877.51 | 1878.052 | 7604.7                                                         | 1 | 1310.9 | 62.5 | 3  | K.VYVGNLGNNGNKTELER.A           |
| *             | HsFlag-NUFIP_Ti_10 | 3.0193 | 0.3527 | 1044.35 | 1044.198 | 5145.9                                                         | 1 | 1183.2 | 93.8 | 7  | R.AFGYYGPLR.S                   |
|               | HsFLAG-ARP6_Ti_2   | 3.9808 | 0.2277 | 1621.89 | 1622.777 | 5591.6                                                         | 1 | 1081.1 | 76.9 | 35 | R.NPPGFAFVEFEDPR.D              |
| *             | HsFLAG-UTX1_Ti_20  | 3.15   | 0.1968 | 2322.14 | 2321.511 | 5073                                                           | 2 | 369.8  | 45   | 6  | R.NPPGFAFVEFEDPRDAADAVR.E       |
| *             | HsARP6-FLAG_Ti_10  | 3.2187 | 0.2243 | 1131.24 | 1131.274 | 7163.5                                                         | 1 | 1008.3 | 77.8 | 4  | R.VRVELSNGEK.R                  |
| *             | HsFLAG-FLJ20309_   | 3.2808 | 0.1802 | 1124.37 | 1124.247 | 6681.2                                                         | 1 | 1208   | 88.9 | 7  | R.NRGPPPSWGR.R                  |
| gj 14277700 r | 8                  | 37     | 40.90% | 132     | 14515    | 7.2 ribosomal protein S12 [Homo sapiens]                       |   |        |      |    |                                 |
| gj 89034991 r | 8                  | 37     | 40.90% | 132     | 14598    | 6.9 PREDICTED: similar to ribosomal protein S12 [Homo sapiens] |   |        |      |    |                                 |
| gj 51468838 r | 8                  | 37     | 40.90% | 132     | 14598    | 6.9 PREDICTED: similar to ribosomal protein S12 [Homo sapiens] |   |        |      |    |                                 |
|               | HsFlag-NUFIP_Ti_10 | 2.3792 | 0.1985 | 1066.71 | 1067.233 | 5574.3                                                         | 4 | 487.9  | 61.1 | 6  | K.TALIHDGLAR.G                  |
|               | HsFlag-NUFIP_Ti_10 | 2.6363 | 0.166  | 1067.53 | 1067.233 | 5103                                                           | 6 | 770.1  | 77.8 | 2  | K.TALIHDGLAR.G                  |
|               | HsFlag-NUFIP_Ti_11 | 4.1687 | 0.376  | 2291.75 | 2292.547 | 5968.6                                                         | 1 | 1094.5 | 61.1 | 1  | K.RQAHLCLVLANCDEPMYVK.L         |
|               | HsFlag-NUFIP_Ti_11 | 5.2725 | 0.3439 | 2291.75 | 2292.547 | 10072.9                                                        | 1 | 1982   | 45.8 | 2  | K.RQAHLCLVLANCDEPMYVK.L         |
|               | HsFlag-NUFIP_Ti_10 | 3.8555 | 0.3648 | 2136.65 | 2136.36  | 8818.7                                                         | 1 | 777.3  | 50   | 2  | R.QAHLCLVLANCDEPMYVK.L          |
|               | HsFLAG-ARP6_Ti_10  | 4.8198 | 0.1209 | 1751.34 | 1752.03  | 7470.9                                                         | 1 | 1662.7 | 75   | 12 | K.LVEALCAEQINLIK.V              |
|               | HsFlag-NUFIP_Ti_10 | 3.2132 | 0.3059 | 1189.76 | 1190.394 | 5456.5                                                         | 1 | 707    | 72.2 | 3  | K.KLGEWVGLCK.I                  |
|               | HsFlag-NUFIP_Ti_10 | 3.5234 | 0.3303 | 1190.63 | 1190.394 | 5208.3                                                         | 1 | 1103.3 | 88.9 | 9  | K.KLGEWVGLCK.I                  |
| gj 38201714 r | 12                 | 58     | 40.80% | 326     | 36092    | 9.2 ELAV-like 1 [Homo sapiens]                                 |   |        |      |    |                                 |
| *             | HsFlag-VPS71_Ti_10 | 3.9851 | 0.3803 | 2164.71 | 2163.453 | 4795.5                                                         | 1 | 641.5  | 61.8 | 5  | R.TNLIVNYLPQNMTQDEL.R.S         |
| *             | HsFLAG-FLJ20729_   | 4.1253 | 0.3683 | 1353.41 | 1354.5   | 6086.5                                                         | 1 | 1512.9 | 83.3 | 8  | R.SLFSSIGEVESAK.L               |
| *             | HsFLAG-Lin9_Ti_20  | 2.5616 | 0.3188 | 1353.49 | 1354.5   | 8433.6                                                         | 1 | 827.5  | 58.3 | 1  | R.SLFSSIGEVESAK.L               |
| *             | HsFLAG-Lin9_Ti_20  | 4.3752 | 0.2735 | 1783.26 | 1784.024 | 6375.9                                                         | 1 | 1436.1 | 45.3 | 2  | K.VAGHSLGYGFVNYVTAK.D           |
| *             | HsFLAG-Lin9_Ti_20  | 4.6822 | 0.3917 | 1783.45 | 1784.024 | 7570.2                                                         | 1 | 1568.2 | 65.6 | 5  | K.VAGHSLGYGFVNYVTAK.D           |
| *             | HsFLAG-FLJ20729_   | 2.7624 | 0.1926 | 1336.34 | 1336.531 | 5806.3                                                         | 1 | 1139.2 | 77.3 | 1  | K.VSYARPSSEVIK.D                |
| *             | HsFLAG-FLJ20729_   | 4.4955 | 0.2531 | 1219.37 | 1219.383 | 8688.7                                                         | 1 | 1990.9 | 90   | 2  | K.DANLYISGLPR.T                 |
| *             | HsFLAG-FLJ20729_   | 4.1365 | 0.3403 | 1189.21 | 1189.354 | 6916.4                                                         | 1 | 1439.4 | 85   | 7  | R.VLVDQTTGLSR.G                 |
| *             | HsFLAG-FLJ20729_   | 5.1818 | 0.2771 | 2769.5  | 2770.028 | 5149.5                                                         | 1 | 653.2  | 31   | 3  | K.RSEAEAITSFNGHKPPGSSEPIVK.F    |
| *             | HsFlag-DPCD_Ti_20  | 4.7286 | 0.3396 | 1569.17 | 1569.804 | 9044.4                                                         | 1 | 1694.7 | 73.1 | 20 | K.NVALLSQLYHSPAR.R              |
| *             | HsFLAG-Lin9_Ti_20  | 3.5741 | 0.2627 | 1569.2  | 1569.804 | 3357.6                                                         | 2 | 719.2  | 51.9 | 1  | K.NVALLSQLYHSPAR.R              |
| *             | HsFLAG-Lin9_Ti_20  | 2.9728 | 0.2243 | 1234.4  | 1234.363 | 6305.4                                                         | 2 | 894.8  | 75   | 3  | R.FGGPVHHQAQR.F                 |
| gj 7706326 re | 4                  | 8      | 40.80% | 125     | 14585    | 9.4 splicing factor 3B, 14 kDa subunit [Homo sapiens]          |   |        |      |    |                                 |
| *             | HsARP6-FLAG_Ti_10  | 4.1783 | 0.2939 | 1417.06 | 1417.617 | 6547.2                                                         | 1 | 1368.6 | 81.8 | 2  | K.ITAEEMYDIFGK.Y                |
| *             | HsARP6-FLAG_Ti_10  | 3.8848 | 0.2974 | 1592.53 | 1591.758 | 7404.9                                                         | 1 | 1264.9 | 65.4 | 4  | R.GTAYVVYEDIFDAK.N              |
| *             | HsFlag-DPCD_Ti_20  | 3.5847 | 0.2813 | 1665.88 | 1664.707 | 7003.3                                                         | 1 | 1130.2 | 73.1 | 1  | K.NACDHLSGFNVCNR.Y              |
| *             | HsFLAG-Lin9_Ti_20  | 3.9669 | 0.2339 | 1388.44 | 1388.609 | 7581.3                                                         | 1 | 1572.3 | 85   | 1  | R.YLVVLYNANR.A                  |
| gj 88988849 r | 18                 | 42     | 40.70% | 703     | 75909    | 8.9 PREDICTED: similar to antiqutin [Homo sapiens]             |   |        |      |    |                                 |
| *             | HsFLAG-TCF3_Ti_10  | 5.0051 | 0.4232 | 2193.85 | 2193.612 | 7022.9                                                         | 1 | 1447.2 | 63.9 | 2  | R.PAAFMSTLLINQPQYAWLK.E         |

|                |                       |        |        |         |          |         |                                                       |        |      |                                              |
|----------------|-----------------------|--------|--------|---------|----------|---------|-------------------------------------------------------|--------|------|----------------------------------------------|
|                | HsFLAG-TCF3_Ti_10     | 3.3565 | 0.1918 | 1906.5  | 1906.069 | 6073.6  | 1                                                     | 736.4  | 56.2 | 1 R.GEVITTYCPANNEPIAR.V                      |
|                | HsFLAG-TCF3_Ti_10     | 2.9498 | 0.1128 | 1340.5  | 1340.43  | 5708.5  | 2                                                     | 583.2  | 72.7 | 1 R.QASVADYEETVK.K                           |
|                | HsFLAG-TCF3_Ti_10     | 4.0738 | 0.3709 | 1474.6  | 1474.799 | 7171.1  | 1                                                     | 1483.2 | 76.9 | 2 K.IQVLGSLVLSLEMGK.I                        |
|                | HsFLAG-TCF3_Ti_10     | 3.2581 | 0.2411 | 2683.11 | 2684.969 | 11249.5 | 1                                                     | 757.8  | 37   | 3 K.ILVEGVGEVQEYVDICDYAVGLSR.M               |
|                | HsFLAG-TCF3_Ti_10     | 2.758  | 0.2282 | 1169.5  | 1170.412 | 6139.2  | 6                                                     | 420.2  | 60   | 1 R.MIGGPILPSE.R.S                           |
|                | HsFLAG-TCF3_Ti_10     | 3.5036 | 0.1533 | 1171.58 | 1170.412 | 5588.2  | 1                                                     | 1294.9 | 90   | 2 R.MIGGPILPSE.R.S                           |
|                | HsFLAG-TCF3_Ti_10     | 3.3907 | 0.3712 | 1346.25 | 1345.579 | 5735.3  | 1                                                     | 938.7  | 73.1 | 2 K.GAPTTSLISVAVTK.I                         |
|                | HsFLAG-TCF3_Ti_10     | 4.9525 | 0.4131 | 1451.44 | 1451.663 | 6761    | 1                                                     | 1797.9 | 80.8 | 4 R.VNLLSFTGSTQVGK.Q                         |
|                | HsFLAG-TCF3_Ti_10     | 2.4456 | 0.2649 | 1451.68 | 1451.663 | 5804    | 2                                                     | 340.4  | 53.8 | 2 R.VNLLSFTGSTQVGK.Q                         |
|                | HsFLAG-TCF3_Ti_10     | 6.0133 | 0.3744 | 3702.96 | 3702.199 | 8230.4  | 1                                                     | 1491.9 | 28.5 | 2 R.SLLELGGNNAIAFEDADLSLVVPSALFAAVGTAGQR.C   |
|                | HsFLAG-TCF3_Ti_10     | 4.147  | 0.3895 | 1708.59 | 1708.914 | 7913.3  | 1                                                     | 1445.3 | 73.1 | 2 R.LFIHESIHDDEVNR.L                         |
|                | HsFLAG-TCF3_Ti_10     | 4.082  | 0.3784 | 1906.93 | 1908.167 | 4233.2  | 1                                                     | 629.4  | 59.4 | 5 R.VGNPWDPNVLYGPLHTK.Q                      |
|                | HsFLAG-TCF3_Ti_10     | 4.9239 | 0.1905 | 1910.1  | 1908.167 | 4979.1  | 1                                                     | 888.1  | 46.9 | 2 R.VGNPWDPNVLYGPLHTK.Q                      |
|                | HsFLAG-TCF3_Ti_10     | 3.592  | 0.3662 | 1609.66 | 1608.893 | 8205.4  | 1                                                     | 1025.3 | 60.7 | 2 K.QAVSMFLGAVEEAKK.E                        |
|                | HsFLAG-TCF3_Ti_10     | 4.9047 | 0.4476 | 4060.88 | 4061.645 | 9390.5  | 1                                                     | 803.7  | 22.2 | 2 K.VMDRPGNYVEPTIVTGLGHDSIAHTETFAPILYVFK.F   |
|                | HsFLAG-TCF3_Ti_10     | 4.7824 | 0.3366 | 1883.53 | 1884.055 | 7410.5  | 1                                                     | 1612.5 | 75   | 2 K.FKNEEEVFAWNNEVK.Q                        |
|                | HsFLAG-TCF3_Ti_10     | 5.2927 | 0.3629 | 2508.2  | 2507.683 | 4319.9  | 1                                                     | 673.9  | 50   | 5 K.GSDCGIVNVNIPTSGAEIGGAFGGEK.H             |
| gij 4506605 re | 7                     | 56     | 40.70% | 140     | 14865    | 10.5    | ribosomal protein L23 [Homo sapiens]                  |        |      |                                              |
| *              | HsFLAG-ARP6_Ti_10     | 4.9124 | 0.4684 | 1969.64 | 1971.227 | 4205.6  | 1                                                     | 693    | 55.3 | 27 R.ISLGLPVGAVINCADNTGAK.N                  |
| *              | HsFLAG-ARP6_Ti_10     | 5.1692 | 0.4547 | 1844.01 | 1844.241 | 8001    | 1                                                     | 2307.2 | 73.5 | 16 R.LNRLPAAGVGDMMVMTVK.K                    |
| *              | HsFLAG-ARP6_Ti_10     | 5.0206 | 0.3615 | 1845.07 | 1844.241 | 5954.5  | 1                                                     | 2546.5 | 57.4 | 7 R.LNRLPAAGVGDMMVMTVK.K                     |
| *              | HsFLAG-ARP6_Ti_10     | 3.8157 | 0.3839 | 1460.45 | 1460.79  | 6057.7  | 1                                                     | 1890   | 85.7 | 2 R.LPAAGVGDMMVMTVK.K                        |
| *              | HsFlag-NUFIP_Ti_11    | 2.792  | 0.3117 | 1018.94 | 1019.278 | 4599    | 4                                                     | 482.2  | 75   | 2 K.KVHPAVVIR.Q                              |
| *              | HsFLAG-TIP49b_Ti_10   | 1.8524 | 0.1141 | 890.54  | 891.104  | 5827.9  | 1                                                     | 549    | 78.6 | 1 K.VHPAVVIR.Q                               |
| *              | HsFLAG-ARP6_Ti_10     | 3.1181 | 0.3206 | 901.26  | 901.051  | 4130.9  | 1                                                     | 1037.1 | 88.9 | 1 K.GSAITGPVAK.E                             |
| gij 23111018 r | 32                    | 295    | 40.50% | 852     | 94370    | 6.7     | RNA binding motif protein 10 isoform 2 [Homo sapiens] |        |      |                                              |
|                | HsFLAG-p53-DNA-D      | 2.7401 | 0.1703 | 1180.62 | 1181.297 | 5182.6  | 1                                                     | 516.5  | 70   | 8 R.GQLQSHGVQAR.E                            |
|                | HsFlag-NUFIP_Ti_10    | 3.8075 | 0.3191 | 1181.36 | 1181.297 | 6403.1  | 1                                                     | 1391.2 | 90   | 40 R.GQLQSHGVQAR.E                           |
|                | HsH2AZ-FLAG_293_      | 4.8317 | 0.4558 | 1725.49 | 1725.901 | 8956.4  | 1                                                     | 2071.3 | 78.6 | 39 R.GFAFVEFSLQDATR.W                        |
|                | HsFLAG-p53-DNA-D      | 5.3208 | 0.3142 | 1770.7  | 1770.016 | 9739.7  | 1                                                     | 2077   | 75   | 27 R.WMEANQHSLNILGQK.V                       |
|                | HsFLAG-Lin9_Ti_20     | 2.4237 | 0.2055 | 1288.58 | 1289.492 | 4529.7  | 3                                                     | 535.4  | 70   | 1 K.VSMHYSDPKPK.I                            |
|                | HsFlag-NUFIP_Ti_10    | 2.7225 | 0.1915 | 1289.42 | 1289.492 | 3455.2  | 6                                                     | 481.3  | 75   | 1 K.VSMHYSDPKPK.I                            |
|                | HsARP6-FLAG_Ti_10     | 3.2198 | 0.2221 | 1191.73 | 1192.28  | 7836.4  | 2                                                     | 1294   | 87.5 | 4 K.INEDWLCNK.C                              |
|                | HsH2AZ-FLAG_293_      | 3.5364 | 0.2358 | 1328.72 | 1329.496 | 4905.1  | 1                                                     | 1266.9 | 81.8 | 1 K.SEAQKPLPLGTR.L                           |
|                | HsFLAG-FLJ20729_      | 4.0519 | 0.2898 | 1198.26 | 1198.365 | 5574.7  | 1                                                     | 1133.1 | 90   | 10 R.LDQQTLPPLGGR.E                          |
|                | HsFLAG-p53-DNA-D      | 5.1787 | 0.2824 | 2827.99 | 2829.2   | 7493.1  | 1                                                     | 1293.9 | 33.7 | 23 R.NLNPHSTMDSILGALAPYAVLSSSNVR.V           |
|                | HsFlag-NUFIP_Ti_10    | 5.7653 | 0.444  | 2828.92 | 2829.2   | 7664.5  | 1                                                     | 1639.8 | 51.9 | 21 R.NLNPHSTMDSILGALAPYAVLSSSNVR.V           |
| *              | HsFLAG-Lin9_Ti_20     | 4.8046 | 0.3357 | 3349.29 | 3348.954 | 5586.7  | 1                                                     | 812.9  | 30   | 4 R.GFAFIQLSTIEAAQLLQILQALHPPLTIDGK.T        |
|                | HsARP6-FLAG_Ti_10     | 2.1201 | 0.1228 | 921.42  | 922.069  | 7145.1  | 4                                                     | 554.9  | 71.4 | 3 K.TINVEFAK.G                               |
|                | HsFLAG-FLJ20729_      | 4.3579 | 0.4022 | 2534.99 | 2535.701 | 8876    | 1                                                     | 1308.7 | 34   | 2 K.GDPTGAGPEASLEPGADSVSMQAFSR.A             |
|                | HsFlag-FLJ90652_2     | 5.5311 | 0.3203 | 2536.28 | 2535.701 | 5205.1  | 1                                                     | 937.9  | 54   | 12 K.GDPTGAGPEASLEPGADSVSMQAFSR.A            |
|                | HsFLAG-ARP6_Ti_2      | 7.5476 | 0.5384 | 3768.67 | 3770.119 | 11301.2 | 1                                                     | 2813.9 | 31.8 | 8 R.AQPGAAPGIYQQSAEASSSQGTAANSQSYTIMSPAFLK.S |
|                | HsFlag-les6_293_Ti_10 | 3.9275 | 0.3663 | 1516.18 | 1516.651 | 4696.4  | 1                                                     | 800    | 76.9 | 13 R.TYVPALEQSADGHK.E                        |

|                                                                                  |        |        |         |          |         |   |        |      |    |                                            |
|----------------------------------------------------------------------------------|--------|--------|---------|----------|---------|---|--------|------|----|--------------------------------------------|
| HsFLAG-p53-DNA-D                                                                 | 4.4336 | 0.3003 | 2187.06 | 2187.371 | 8227.7  | 1 | 1028.4 | 52.5 | 1  | R.TYVPALEQSADGHKETGAPSK.E                  |
| HsFLAG-ARP5_Ti_1                                                                 | 3.7954 | 0.3767 | 2503.21 | 2501.712 | 3932.3  | 1 | 829.8  | 39.1 | 2  | R.TYVPALEQSADGHKETGAPSK.E                  |
| HsARP6-FLAG_Ti_1                                                                 | 2.6535 | 0.1861 | 1149.16 | 1149.292 | 3711.7  | 2 | 627.6  | 83.3 | 2  | K.NSFQPISSLR.D                             |
| HsFlag-DPCD_Ti_20                                                                | 4.2484 | 0.3178 | 1439.35 | 1439.562 | 8141.1  | 1 | 2470   | 84.6 | 10 | R.ESATADAGYAILEK.K                         |
| HsFlag-NUFIP_Ti_20                                                               | 2.9015 | 0.2106 | 1047.48 | 1048.19  | 5598.6  | 1 | 512.9  | 75   | 4  | R.HQQLSGLHK.Q                              |
| HsFlag-DPCD_Ti_20                                                                | 2.9624 | 0.083  | 1048.03 | 1048.19  | 8150.5  | 8 | 743.5  | 75   | 1  | R.HQQLSGLHK.Q                              |
| HsFLAG-p53-DNA-D                                                                 | 3.8299 | 0.1603 | 1639.61 | 1639.806 | 7054.3  | 1 | 1027   | 69.2 | 2  | R.RAHLSENELEALEK.N                         |
| HsFLAG-Lin9_Ti_20                                                                | 3.4231 | 0.2285 | 1482.79 | 1483.618 | 5679.1  | 1 | 724.4  | 62.5 | 1  | R.AHLSENELEALEK.N                          |
| HsH2AZ-FLAG_293_                                                                 | 4.4575 | 0.4333 | 1483.58 | 1483.618 | 5074    | 1 | 1377   | 87.5 | 20 | R.AHLSENELEALEK.N                          |
| HsFLAG-ARP5_Ti_1                                                                 | 3.8399 | 0.1632 | 2359.45 | 2360.616 | 4438.1  | 1 | 889.6  | 40.8 | 3  | R.AHLSENELEALEKNDMEQMK.Y                   |
| HsFLAG-p53-DNA-D                                                                 | 5.3946 | 0.4197 | 1856.14 | 1857.03  | 6839    | 1 | 2051.8 | 75   | 2  | R.KYGGISTASVDFEQPTR.D                      |
| HsFLAG-Lin9_Ti_20                                                                | 4.5126 | 0.4349 | 1727.96 | 1728.856 | 8285.9  | 1 | 1389.9 | 63.3 | 15 | K.YGGISTASVDFEQPTR.D                       |
| HsH2AZ-FLAG_293_                                                                 | 3.1781 | 0.2426 | 1093.12 | 1091.123 | 4757.1  | 1 | 780    | 80   | 6  | R.DGLGSDNIGSR.M                            |
| HsFLAG-FLJ20729_                                                                 | 2.5255 | 0.2164 | 1314.49 | 1313.497 | 4499.2  | 3 | 442.7  | 63.6 | 1  | K.QGIVTPIEAQTR.V                           |
| HsFlag-ZnF-HIT2_Ti_124                                                           | 3.4101 | 0.4467 | 1366.16 | 1366.424 | 5424    | 1 | 1221.5 | 79.2 | 8  | R.GSSYGVSTESYK.E                           |
| gi 13654237  protein kinase, DNA-activated, catalytic polypeptide [Homo sapiens] |        |        |         |          |         |   |        |      |    |                                            |
| HsFlag-VPS71_Ti_1                                                                | 3.1564 | 0.1969 | 1104.55 | 1104.205 | 4645.3  | 1 | 1004.4 | 88.9 | 1  | R.LQETLSAADR.C                             |
| HsFLAG-ARP6_Ti_1                                                                 | 3.4156 | 0.348  | 1267.07 | 1267.44  | 6775.3  | 1 | 1188.7 | 77.3 | 2  | R.CGAALAGHLIR.G                            |
| HsYL1_Ti_103.2394                                                                | 2.2289 | 0.1184 | 995.91  | 996.279  | 4933    | 1 | 542.8  | 68.8 | 1  | K.IPALDLLIK.L                              |
| HsFlag-VPS71_Ti_1                                                                | 4.9831 | 0.3646 | 2859.06 | 2859.27  | 5206.6  | 1 | 1588.6 | 42.7 | 6  | K.VYELLGLLGEVHPSEMINNAENLFR.A              |
| HsFlag-VPS71_Ti_1                                                                | 3.0001 | 0.2689 | 1248.68 | 1248.44  | 5800.7  | 9 | 600.1  | 65   | 3  | K.TQMTSAVREPK.L                            |
| HsYL1_Ti_104.1712                                                                | 2.5984 | 0.1812 | 970.73  | 971.194  | 7066.3  | 1 | 875.1  | 75   | 10 | K.LPVLGCLK.G                               |
| HsARP6-FLAG_Ti_1                                                                 | 2.5794 | 0.1694 | 971.23  | 971.194  | 4773.7  | 6 | 851.5  | 81.2 | 1  | K.LPVLGCLK.G                               |
| HsFLAG-ARP6_Ti_1                                                                 | 3.4483 | 0.3049 | 1240.19 | 1240.408 | 5303.3  | 1 | 862    | 80   | 3  | K.GLSSLLCNFTK.S                            |
| HsFLAG-FLJ20729_                                                                 | 3.4904 | 0.2367 | 1090.48 | 1090.271 | 8161.7  | 4 | 1063   | 83.3 | 3  | K.RYAVPSAGLR.L                             |
| HsFLAG-p53-DNA-D                                                                 | 3.1573 | 0.3197 | 1278.35 | 1278.535 | 5137.7  | 1 | 527.8  | 68.2 | 1  | K.KAALSALESFLK.Q                           |
| HsARP6-FLAG_Ti_1                                                                 | 2.6896 | 0.2787 | 1150.62 | 1150.36  | 5945.8  | 1 | 1047.9 | 80   | 1  | K.AALSALESFLK.Q                            |
| HsFlag-VPS71_Ti_1                                                                | 4.6649 | 0.4004 | 1709.82 | 1709.015 | 6948.1  | 1 | 2076.1 | 87.5 | 1  | K.LQYFMEQFYGIIR.N                          |
| HsFLAG-Lin9_Ti_20                                                                | 3.0104 | 0.2447 | 1496.71 | 1497.704 | 4200.8  | 1 | 268.9  | 58.3 | 1  | R.NCISTVVHQGLIR.I                          |
| HsFlag-FLJ90652_2                                                                | 4.1712 | 0.3847 | 1497.19 | 1497.704 | 10300.3 | 1 | 1686.9 | 75   | 6  | R.NCISTVVHQGLIR.I                          |
| HsFlag-VPS71_Ti_1                                                                | 5.8917 | 0.4717 | 4322.47 | 4321.774 | 10178.5 | 1 | 1708.5 | 26.4 | 1  | R.HLLSSDQMMDSILADEAFFSVNSSSESLNHLLYDEFVK.S |
| HsARP6-FLAG_Ti_1                                                                 | 3.8115 | 0.3091 | 1619.74 | 1618.796 | 9750.5  | 1 | 1265.6 | 62.5 | 5  | K.DFSAFINLVEFCR.E                          |
| HsYL1_Ti_102.1448                                                                | 1.8945 | 0.1846 | 926.84  | 927.045  | 4732    | 1 | 442.6  | 78.6 | 1  | K.YFEGVSPK.S                               |
| HsFLAG-Lin9_Ti_20                                                                | 3.5113 | 0.0991 | 3201.21 | 3202.684 | 8747.1  | 5 | 589.1  | 25   | 1  | K.QYKDELLASCLTFLLSLPHNIIELDVR.A            |
| HsFlag-VPS71_Ti_1                                                                | 4.3449 | 0.5036 | 2823.49 | 2824.203 | 6840.8  | 1 | 1195   | 47.9 | 3  | K.LGLSYTPLAEVGLNALEEWISIYDR.H              |
| HsFLAG-ARP6_Ti_1                                                                 | 2.9148 | 0.2172 | 1176.94 | 1176.274 | 6813.4  | 1 | 1060.3 | 83.3 | 1  | K.NNWEVSALSR.A                             |
| HsYL1-FLAG_Ti_20                                                                 | 4.9663 | 0.3643 | 1576.58 | 1575.716 | 6424.5  | 1 | 1306   | 76.9 | 3  | K.NLSSNEAISLEEIR.I                         |
| HsFlag-VPS71_Ti_1                                                                | 3.1254 | 0.4037 | 1443.65 | 1444.733 | 4751.1  | 1 | 368.7  | 53.8 | 2  | R.VVQMLGSLGGQINK.N                         |
| HsFlag-VPS71_Ti_1                                                                | 5.1522 | 0.1853 | 1444.64 | 1444.733 | 7862.3  | 1 | 2028.7 | 84.6 | 19 | R.VVQMLGSLGGQINK.N                         |
| HsYL1_Ti_106.2268                                                                | 2.7473 | 0.1267 | 1093.7  | 1093.317 | 5598.8  | 3 | 774.1  | 87.5 | 1  | K.RLSFAVPPFR.E                             |
| HsFLAG-p53-DNA-D                                                                 | 3.4665 | 0.3077 | 1705.08 | 1705.111 | 5308.8  | 1 | 1261.6 | 76.9 | 3  | R.EMKPVIFLDVFLPR.V                         |
| HsFlag-VPS71_Ti_1                                                                | 4.5739 | 0.4276 | 1316.52 | 1316.629 | 7374.2  | 1 | 1732.8 | 85   | 3  | K.PVIFLDVFLPR.V                            |
| HsVPS71-FLAG_Ti_1                                                                | 2.8424 | 0.2979 | 1176.73 | 1176.312 | 8318.3  | 1 | 871.6  | 70   | 1  | R.VTELALTASDR.Q                            |

|                    |        |        |         |          |        |   |        |      |                                             |
|--------------------|--------|--------|---------|----------|--------|---|--------|------|---------------------------------------------|
| HsFLAG-p53-DNA-D   | 4.6937 | 0.4194 | 1937.23 | 1938.378 | 6834.2 | 1 | 1415.1 | 65.6 | 12 K.VAACELLHSMVMFMLGK.A                    |
| HsFLAG-ARP6_Ti_1   | 3.9465 | 0.358  | 2067.47 | 2068.37  | 4524.7 | 1 | 788.1  | 63.9 | 2 K.ATQMPEGGQGAPPMYQLYK.R                   |
| HsFlag-VPS71_Ti_1  | 2.4189 | 0.2337 | 1176.57 | 1177.266 | 5118.2 | 4 | 371.8  | 61.1 | 1 R.LACDVDQVTR.Q                            |
| HsFlag-VPS71_Ti_1  | 3.4514 | 0.2887 | 1178.73 | 1177.266 | 5894.8 | 1 | 1494.4 | 94.4 | 1 R.LACDVDQVTR.Q                            |
| HsFLAG-FLJ20729_   | 3.9892 | 0.3433 | 2275.74 | 2275.673 | 7316.8 | 1 | 706.9  | 50   | 7 R.QLYEPLVMLIHWFNTNNK.K                    |
| HsFLAG-Lin9_Ti_20  | 4.6992 | 0.3315 | 2946.18 | 2946.324 | 8007   | 1 | 984.6  | 40.4 | 3 K.KFESQDTVALLEAILDGVDPVDSTLR.D            |
| HsFLAG-p53-DNA-D   | 2.7201 | 0.2388 | 1530.94 | 1530.813 | 5522.1 | 2 | 681.3  | 70.8 | 1 K.RLYSLALHPNAFK.R                         |
| HsFLAG-Lin9_Ti_20  | 3.8855 | 0.3579 | 1374.1  | 1374.626 | 7855.5 | 1 | 1814.1 | 81.8 | 7 R.LYSLALHPNAFK.R                          |
| HsFLAG-p53-DNA-D   | 3.5594 | 0.2787 | 1530.49 | 1530.813 | 6622.1 | 1 | 1028.1 | 75   | 2 R.LYSLALHPNAFK.R.L                        |
| HsYL1_Ti_103.1928. | 3.4673 | 0.2255 | 1339.68 | 1339.537 | 4709.1 | 1 | 865.5  | 77.3 | 3 R.LGASLAFNNIYR.E                          |
| HsFlag-VPS71_Ti_1  | 3.9839 | 0.4009 | 2048.54 | 2048.159 | 8824.4 | 1 | 893.9  | 50   | 3 K.SLGTIQCCDAIDHLCLR.I                     |
| HsFlag-VPS71_Ti_1  | 5.5792 | 0.3974 | 3880.61 | 3881.384 | 8246.6 | 1 | 1436.2 | 26.4 | 8 K.DVLKEEGVSFLINTFEGGGCGQPSGILAQPTLLYL.R.G |
| HsFLAG-Lin9_Ti_20  | 5.1073 | 0.4657 | 1815.79 | 1816.105 | 5611.3 | 1 | 1473.6 | 73.5 | 14 R.TVGALQVLGTEAQSSLLK.A                   |
| HsFlag-VPS71_Ti_1  | 5.0433 | 0.4681 | 2077.07 | 2077.446 | 6030.8 | 1 | 1251.4 | 63.9 | 13 K.AVAFFLESIAMHDIIAEK.C                   |
| HsFLAG-ARP6_Ti_1   | 3.7921 | 0.229  | 1968.65 | 1969.26  | 8317.7 | 1 | 798.5  | 50   | 1 R.IMEFTTLLNTSPEGWK.L                      |
| HsFlag-VPS71_Ti_1  | 4.7321 | 0.2615 | 3770.99 | 3770.37  | 5396.2 | 8 | 353.9  | 22   | 1 R.VLVQTLCEPASIGFNIQDQVMAHLPDVCVNL.MK.A    |
| HsFlag-VPS71_Ti_1  | 4.5945 | 0.3123 | 2563.98 | 2563.79  | 7346.7 | 1 | 1080.5 | 47.7 | 8 K.ITAQSIEELCAVNLVYGPDAQVDR.S              |
| HsYL1_Ti_102.1270. | 1.9614 | 0.2325 | 919.8   | 919.075  | 7237.9 | 3 | 769    | 75   | 2 R.LAAVVSACK.Q                             |
| HsFLAG-FLJ20729_   | 5.9348 | 0.4696 | 3143.93 | 3144.598 | 8878   | 1 | 2133   | 36.6 | 6 R.AGLLHNILPSQSTDLHHSVGTTELLSLVYK.G        |
| HsARP6-FLAG_Ti_1   | 2.5897 | 0.3164 | 2052.33 | 2053.332 | 8987.7 | 2 | 745.7  | 47.2 | 1 K.QLASGLLELAFAGGLCER.L                    |
| HsYL1_Ti_102.3251. | 4.4206 | 0.4037 | 1991.65 | 1991.264 | 9459.7 | 1 | 1666.1 | 64.7 | 9 K.NLDLAVLELMQSSVDNTK.M                    |
| HsYL1_Ti_105.1760. | 2.0448 | 0.14   | 1210.55 | 1211.45  | 4744.4 | 1 | 384.9  | 66.7 | 1 K.LATTILQHWK.K                            |
| HsFLAG-ARP6_Ti_1   | 3.3526 | 0.2598 | 1212.14 | 1211.45  | 7120.3 | 1 | 945.4  | 77.8 | 14 K.LATTILQHWK.K                           |
| HsFlag-VPS71_Ti_1  | 4.9829 | 0.3023 | 2339.02 | 2337.678 | 3514.6 | 1 | 849.1  | 61.9 | 1 K.GQAVTLLPFFTSLTGGSSLEELR.R               |
| HsFLAG-ARP6_Ti_1   | 4.0509 | 0.3221 | 1768.36 | 1769.115 | 7145.1 | 1 | 1103.3 | 64.3 | 3 R.VLEQLIVAHFPMQSR.E                       |
| HsFlag-VPS71_Ti_1  | 5.4343 | 0.3444 | 2712.98 | 2710.183 | 7593.9 | 1 | 1293.1 | 35.2 | 1 K.FLDALELSQSPMLLELMTEVLCR.E               |
| HsFLAG-p53-DNA-D   | 4.2634 | 0.3802 | 1895.75 | 1896.084 | 6891.2 | 1 | 1288   | 67.9 | 3 R.EQQHVMEELFQSSFR.R                       |
| HsYL1_Ti_106.2890. | 3.4127 | 0.3821 | 2233.69 | 2232.526 | 5832.6 | 1 | 708.9  | 55.6 | 1 R.RGSCVTQVGLLESVYEMFR.K                   |
| HsYL1_Ti_103.3694. | 3.889  | 0.367  | 2076.74 | 2076.338 | 5075.9 | 1 | 912.2  | 61.8 | 1 R.GSCVTQVGLLESVYEMFR.K                    |
| HsFLAG-Lin9_Ti_20  | 3.4965 | 0.0851 | 1696.33 | 1696.981 | 7548   | 2 | 1181.3 | 67.9 | 3 R.EFFSTIVDAIDVLK.S                        |
| HsTIP60_Ti_102.175 | 3.2242 | 0.3364 | 1397.33 | 1397.525 | 9034   | 1 | 1191   | 72.7 | 2 K.LNESTFDTQITK.K                          |
| HsFlag-VPS71_Ti_1  | 2.0937 | 0.144  | 1022.76 | 1023.177 | 4372.1 | 1 | 461.6  | 68.8 | 2 R.LPKDDVHAK.E                             |
| HsYL1_Ti_104.0882. | 2.84   | 0.1425 | 1023.42 | 1023.177 | 3580.4 | 1 | 1032.1 | 93.8 | 1 R.LPKDDVHAK.E                             |
| HsFLAG-ARP6_Ti_1   | 5.7435 | 0.4816 | 2047.02 | 2048.226 | 8240.3 | 1 | 2080.2 | 70.6 | 14 K.INQVFHGCSCITEGNELTK.T                  |
| HsFlag-VPS71_Ti_1  | 3.5245 | 0.4436 | 2274.9  | 2275.461 | 7249.1 | 1 | 997.2  | 58.3 | 3 K.LCYDAFTENMAGENQLLER.R                   |
| HsFLAG-FLJ20729_   | 3.7376 | 0.416  | 1620.06 | 1620.845 | 7261   | 1 | 1663.6 | 83.3 | 9 K.FYQGFLFSEKPEK.N                         |
| HsYL1_Ti_103.3372. | 4.4801 | 0.1354 | 1445.54 | 1445.742 | 5733.3 | 1 | 1671.3 | 86.4 | 34 K.NLLIFENLIDLK.R                         |
| HsYL1_Ti_102.2228. | 3.2515 | 0.4075 | 1609.46 | 1609.837 | 5136.4 | 1 | 762.3  | 66.7 | 7 R.YNFPVEVEVPMER.K                         |
| HsFlag-VPS71_Ti_1  | 3.6397 | 0.3369 | 1370.94 | 1370.616 | 5671.2 | 1 | 1193.6 | 81.8 | 2 R.HECMAPLTALVK.H                          |
| HsFLAG-Lin9_Ti_20  | 3.6447 | 0.4909 | 1467.66 | 1468.563 | 4892.5 | 1 | 854.1  | 73.1 | 10 R.SLGPPQGEEDSVPR.D                       |
| HsFLAG-ARP6_Ti_1   | 3.0748 | 0.2967 | 1206.61 | 1206.474 | 4974.8 | 2 | 774.4  | 80   | 5 K.LGNPIVPLNIR.L                           |
| HsYL1_Ti_103.1931. | 3.3955 | 0.3107 | 1680.84 | 1679.957 | 6583.1 | 1 | 1074.5 | 69.2 | 4 K.LVINTEEVFRPYAK.H                        |
| HsARP6-FLAG_Ti_1   | 4.4738 | 0.2774 | 1589.91 | 1588.888 | 6384.3 | 1 | 1533.2 | 75   | 8 K.EVYAAAAEVLGLILR.Y                       |

|                    |        |        |         |          |        |   |        |      |                                            |
|--------------------|--------|--------|---------|----------|--------|---|--------|------|--------------------------------------------|
| HsFLAG-ARP6_Ti_1   | 4.8965 | 0.3931 | 1518.15 | 1518.714 | 7517.6 | 1 | 2222.5 | 87.5 | 9 K.NILEESLCELVAK.Q                        |
| HsFlag-VPS71_Ti_1  | 4.0647 | 0.3028 | 1327.47 | 1327.67  | 6381.3 | 1 | 1554.7 | 90   | 5 R.FMNAVFFLLPK.F                          |
| HsFLAG-ARP6_Ti_1   | 4.0746 | 0.417  | 2085.59 | 2086.318 | 7522.6 | 1 | 757.1  | 50   | 6 R.ELLNPVVEFVSHPSTTCR.E                   |
| HsFLAG-ARP6_Ti_1   | 4.8837 | 0.4951 | 1754.18 | 1754.758 | 8071.1 | 1 | 1912.7 | 78.6 | 1 R.DPESETDNDSQEIFK.L                      |
| HsFLAG-Lin9_Ti_20  | 6.0493 | 0.4143 | 2119.77 | 2120.497 | 8814.9 | 1 | 1765.9 | 63.9 | 31 K.DVLIQGLIDENPGLQLIIR.N                 |
| HsARP6-FLAG_Ti_1   | 3.7488 | 0.1585 | 1219.28 | 1219.467 | 4257   | 2 | 747.3  | 80   | 4 R.LLALNSLYSPK.I                          |
| HsYL1_Ti_102.2174. | 5.76   | 0.4048 | 2296.05 | 2296.601 | 6363.9 | 1 | 1103.6 | 57.5 | 12 R.STVLTMPFVETQASQGTQLQTR.T              |
| HsFlag-VPS71_Ti_1  | 5.2335 | 0.3881 | 1918.3  | 1919.018 | 8493.5 | 1 | 1026.6 | 56.2 | 13 R.ATQQQHDFTLTQTADGR.S                   |
| HsFlag-VPS71_Ti_1  | 4.2415 | 0.1238 | 3235.16 | 3236.475 | 6179.8 | 1 | 669.7  | 25   | 7 R.SSFDWLTGSSTDPLVDHTSPSSDSSLFAHKR.R      |
| HsFLAG-p53-DNA-D   | 6.204  | 0.467  | 3390.7  | 3392.663 | 6292.9 | 1 | 934.6  | 30   | 1 R.SSFDWLTGSSTDPLVDHTSPSSDSSLFAHKR.S      |
| HsFlag-VPS71_Ti_1  | 3.4546 | 0.1493 | 1314.59 | 1313.453 | 5263.9 | 1 | 996.9  | 81.8 | 2 K.RLGLPGDEVDNK.V                         |
| HsFLAG-Lin9_Ti_20  | 3.6398 | 0.2149 | 1135.53 | 1136.293 | 7382.1 | 1 | 1380.1 | 83.3 | 3 R.HGDLPDIQIK.H                           |
| HsYL1_Ti_106.2196. | 2.354  | 0.344  | 1520.63 | 1521.76  | 3307.9 | 1 | 210.7  | 53.8 | 1 K.HSSLITPLQAVAQR.D                       |
| HsFLAG-p53-DNA-D   | 3.9323 | 0.2492 | 1521.04 | 1521.76  | 6562.4 | 1 | 1074.7 | 69.2 | 15 K.HSSLITPLQAVAQR.D                      |
| HsFLAG-ARP6_Ti_1   | 3.6626 | 0.3041 | 1521.26 | 1521.76  | 7050.3 | 1 | 1361.1 | 46.2 | 2 K.HSSLITPLQAVAQR.D                       |
| HsYL1_Ti_106.2351. | 3.9572 | 0.3778 | 2160.44 | 2159.537 | 4656.9 | 1 | 512.4  | 47.4 | 4 K.HSSLITPLQAVARDPPIAK.Q                  |
| HsFLAG-p53-DNA-D   | 3.641  | 0.3188 | 1340.53 | 1340.605 | 5145.2 | 1 | 986.6  | 86.4 | 16 K.QLFSSLFSGILK.E                        |
| HsFlag-VPS71_Ti_1  | 5.3062 | 0.3326 | 2297.83 | 2298.482 | 7277.9 | 1 | 1727.1 | 67.6 | 7 K.DFWELASLDCYNHLAEWK.S                   |
| HsYL1-FLAG_Ti_20   | 4.7808 | 0.4106 | 2242.86 | 2241.336 | 6649.6 | 1 | 1065.8 | 57.9 | 7 K.SLEYCSTASIDSENPPDLNK.I                 |
| HsFLAG-p53-DNA-D   | 4.0708 | 0.3767 | 2236.63 | 2237.578 | 7495.1 | 1 | 574.4  | 50   | 4 K.IWSEPFYQETYLPYMR.S                     |
| HsFlag-VPS71_Ti_1  | 5.8271 | 0.3801 | 1904.89 | 1905.199 | 7633.8 | 1 | 2216.3 | 75   | 12 K.LLLQGEADQSLLTFIDK.A                   |
| HsFLAG-Lin9_Ti_20  | 5.457  | 0.4129 | 2181.39 | 2182.522 | 7428   | 1 | 2442.5 | 72.2 | 38 K.LQSVQALTEIQEFISFISK.Q                 |
| HsFLAG-p53-DNA-D   | 3.2144 | 0.2798 | 1591.88 | 1592.795 | 5346.3 | 1 | 714.2  | 66.7 | 5 R.LLNTWTNRYPDAM                          |
| HsFlag-VPS71_Ti_1  | 4.2702 | 0.2592 | 1735.72 | 1734.983 | 4931.8 | 1 | 1035.9 | 76.9 | 3 K.MDPMNIWDDIITNR.C                       |
| HsYL1-FLAG_Ti_20   | 3.8478 | 0.2084 | 1806.56 | 1806.983 | 8895.7 | 2 | 1139.1 | 60.7 | 1 R.MEVQEQEEDISSLIR.S                      |
| HsFlag-VPS71_Ti_1  | 4.1535 | 0.4005 | 1973.93 | 1972.133 | 4835.4 | 1 | 782.5  | 67.9 | 2 K.TRDDWLVSWWQSYCR.L                      |
| HsFlag-VPS71_Ti_1  | 4.4792 | 0.2605 | 1450.66 | 1449.61  | 4898.4 | 1 | 1019.5 | 79.2 | 4 R.SQGCSEQVLTVLK.T                        |
| HsTIP60_Ti_104.255 | 4.714  | 0.4368 | 1769.77 | 1769.946 | 7034.1 | 1 | 1520.6 | 70   | 7 K.TVSLLDENNVSSYLSK.N                     |
| HsYL1_Ti_105.2370. | 3.0653 | 0.3507 | 2009.23 | 2009.316 | 7175.1 | 1 | 468.7  | 46.9 | 1 K.NILAFRDQNILLGTTYR.I                    |
| HsYL1_Ti_102.2186. | 5.2947 | 0.3119 | 2174.43 | 2174.376 | 4542.8 | 1 | 660.4  | 55.3 | 20 R.IIANALSSEPAEIEEDK.A                   |
| HsYL1-FLAG_Ti_20   | 3.6137 | 0.3247 | 1481.52 | 1481.554 | 6779.2 | 2 | 974.3  | 69.2 | 1 R.ILELSGSSSEDEK.V                        |
| HsFLAG-p53-DNA-D   | 5.2116 | 0.3823 | 2633.43 | 2633.912 | 8828.7 | 1 | 1318.7 | 47.8 | 2 R.KEEENASVIDSAELQAYPALVVEK.M             |
| HsFLAG-Lin9_Ti_20  | 3.9705 | 0.1915 | 2633.79 | 2633.912 | 7116.5 | 2 | 825.7  | 30.4 | 1 R.KEEENASVIDSAELQAYPALVVEK.M             |
| HsFlag-VPS71_Ti_1  | 5.4266 | 0.4281 | 2178    | 2178.592 | 8293.8 | 1 | 1247   | 58.8 | 11 R.LLQIIERYPEETLSLMTK.E                  |
| HsFlag-VPS71_Ti_1  | 5.0687 | 0.4028 | 2178.73 | 2178.592 | 8378   | 1 | 2547   | 51.5 | 6 R.LLQIIERYPEETLSLMTK.E                   |
| HsFlag-VPS71_Ti_1  | 4.1927 | 0.2968 | 3975.74 | 3977.373 | 6066   | 1 | 759.7  | 24.3 | 6 K.DQAVAVQHSVEEITDNYPPQAIYYPFIISSESYSFK.D |
| HsFlag-VPS71_Ti_1  | 5.8434 | 0.4078 | 3003.59 | 3004.41  | 8429.9 | 1 | 1203.7 | 30.8 | 16 K.SKLDQGGVIQDFINALDQLSNPELLFK.D         |
| HsFlag-VPS71_Ti_1  | 5.2965 | 0.384  | 3004.8  | 3004.41  | 8063.1 | 1 | 1292.3 | 46.2 | 4 K.SKLDQGGVIQDFINALDQLSNPELLFK.D          |
| HsFLAG-p53-DNA-D   | 5.8528 | 0.3505 | 2789.27 | 2789.158 | 9035.4 | 1 | 2061.3 | 52.1 | 7 K.LDQGGVIQDFINALDQLSNPELLFK.D            |
| HsFLAG-Lin9_Ti_20  | 4.5163 | 0.2729 | 2789.33 | 2789.158 | 7850.6 | 1 | 1010.2 | 31.2 | 2 K.LDQGGVIQDFINALDQLSNPELLFK.D            |
| HsFlag-VPS71_Ti_1  | 2.2286 | 0.2375 | 788.62  | 788.925  | 2602.3 | 2 | 143.2  | 64.3 | 1 K.APGLGAFR.R                             |
| HsFLAG-p53-DNA-D   | 3.1557 | 0.2288 | 1360.11 | 1360.552 | 9338.6 | 1 | 1551.9 | 80   | 2 K.FIQTFGKEFDK.H                          |
| HsYL1_Ti_102.3170. | 5.2157 | 0.2961 | 1637.71 | 1637.932 | 5796.6 | 1 | 1569   | 84.6 | 10 K.LSDFNDITNMLLLK.M                      |

|               |                    |        |        |         |          |         |   |        |      |    |                                                                  |
|---------------|--------------------|--------|--------|---------|----------|---------|---|--------|------|----|------------------------------------------------------------------|
|               | HsFlag-VPS71_Ti_10 | 6.5433 | 0.4405 | 2396.14 | 2395.659 | 8616.7  | 1 | 2586.8 | 46.2 | 4  | R.VEQLFQVMNGILAQDSACSQR.A                                        |
|               | HsYL1_Ti_102.3086. | 5.8733 | 0.4184 | 2397.02 | 2395.659 | 7388.5  | 1 | 1701   | 62.5 | 5  | R.VEQLFQVMNGILAQDSACSQR.A                                        |
| *             | HsFlag-VPS71_Ti_10 | 4.7181 | 0.2933 | 1630.18 | 1629.937 | 6549.9  | 1 | 1458.8 | 76.9 | 28 | R.LGLIEWLENTVTLK.D                                               |
|               | HsYL1_Ti_104.1338. | 3.8227 | 0.3105 | 1340.95 | 1339.451 | 7640.5  | 1 | 1027.4 | 68.2 | 11 | K.GANRTETVTSFR.K                                                 |
|               | HsFLAG-p53-DNA-D   | 2.9051 | 0.3643 | 1621.61 | 1621.953 | 9990.1  | 2 | 667.7  | 50   | 1  | K.ETGLMYSIMVHALR.A                                               |
|               | HsFLAG-FLJ20729_   | 4.0691 | 0.4355 | 1637.15 | 1637.888 | 5477.1  | 1 | 1357   | 82.1 | 9  | R.SDPGLLTNTMDVFK.E                                               |
|               | HsYL1_Ti_104.1802. | 4.9206 | 0.2972 | 1561.04 | 1559.762 | 8216.8  | 1 | 1539.7 | 69.2 | 8  | K.KGGSWIQEINVAEK.N                                               |
|               | HsFLAG-ARP6_Ti_10  | 3.5376 | 0.3083 | 2121.39 | 2122.392 | 3531.1  | 1 | 540.9  | 38.2 | 1  | K.LAGANPAVITCDELLLGHEK.A                                         |
|               | HsFLAG-p53-DNA-D   | 4.4011 | 0.3141 | 2122.77 | 2122.392 | 6524.3  | 1 | 1231.3 | 57.9 | 9  | K.LAGANPAVITCDELLLGHEK.A                                         |
|               | HsSrcap_Ti_201.073 | 3.759  | 0.2333 | 1633.38 | 1632.722 | 4950.6  | 1 | 647.8  | 64.3 | 4  | R.AQEPESGLSEETQVK.C                                              |
|               | HsFLAG-FLJ20729_   | 3.2417 | 0.2553 | 1605.62 | 1604.785 | 6198.3  | 1 | 984    | 73.1 | 1  | K.CLMDQATDPNILGR.T                                               |
| gi 32455264 r |                    | 9      | 17     | 40.20%  | 199      | 22110   |   |        |      |    | 8.1 peroxiredoxin 1 [Homo sapiens]                               |
| gi 4505591 re |                    | 9      | 17     | 40.20%  | 199      | 22110   |   |        |      |    | 8.1 peroxiredoxin 1 [Homo sapiens]                               |
| gi 32455266 r |                    | 9      | 17     | 40.20%  | 199      | 22110   |   |        |      |    | 8.1 peroxiredoxin 1 [Homo sapiens]                               |
|               | HsFLAG-FLJ20729_   | 2.1531 | 0.2154 | 980.42  | 981.142  | 5432.3  | 1 | 591.3  | 75   | 4  | K.IGHPAPNFK.A                                                    |
|               | HsFLAG-ARP8_Ti_2   | 3.8271 | 0.2934 | 1752.6  | 1752.082 | 3975.2  | 1 | 556.8  | 59.4 | 1  | K.KQGGLGPMNIPLVSDPK.R                                            |
|               | HsFlag-VPS71_Ti_10 | 3.3492 | 0.3322 | 1624.42 | 1623.908 | 6283.6  | 1 | 898.4  | 60   | 2  | K.QGGLGPMNIPLVSDPK.R                                             |
|               | HsFLAG-FLJ20729_   | 2.9201 | 0.1987 | 1264.4  | 1264.467 | 4976.1  | 1 | 688.1  | 70   | 2  | K.RTIAQDYGVLK.A                                                  |
|               | HsFLAG-KIAA0515_   | 2.9532 | 0.1804 | 1212.33 | 1212.392 | 5537    | 2 | 805.4  | 80   | 1  | R.QITVNDLPVGR.S                                                  |
|               | HsFLAG-KIAA0515_   | 3.5023 | 0.2731 | 1198.25 | 1197.376 | 5290.8  | 1 | 1130.6 | 88.9 | 2  | R.LVQAFQFTDK.H                                                   |
|               | HsFlag-VPS71_Ti_10 | 4.6358 | 0.3108 | 2407.06 | 2407.654 | 7084.8  | 1 | 850    | 47.6 | 1  | K.HGEVCPAGWKPGSDTIKPDVQK.S                                       |
|               | HsFLAG-TCF3_Ti_10  | 5.0195 | 0.3701 | 2407.52 | 2407.654 | 7497.1  | 1 | 2012.8 | 44   | 3  | K.HGEVCPAGWKPGSDTIKPDVQK.S                                       |
|               | HsFlag-FLJ90652_20 | 3.4658 | 0.208  | 1285.41 | 1285.44  | 8216.9  | 2 | 1155   | 72.7 | 1  | K.PGSDTIKPDVQK.S                                                 |
| gi 10863977 r |                    | 2      | 7      | 40.00%  | 95       | 10835   |   |        |      |    | 6.5 LSM2 homolog, U6 small nuclear RNA associated [Homo sapiens] |
| *             | HsFLAG-ARP6_Ti_10  | 2.9354 | 0.2786 | 2189.82 | 2191.412 | 11836.2 | 1 | 673.6  | 41.7 | 1  | K.NDLSICGTLHSVDQYLNLIK.L                                         |
| *             | HsH2AZ-FLAG_293_   | 4.635  | 0.3373 | 2145.5  | 2146.362 | 4699.9  | 1 | 1559.4 | 72.2 | 6  | R.YVQLPADEVDTQLLQDAAR.K                                          |
| gi 4885375 re |                    | 19     | 225    | 39.90%  | 213      | 21365   |   |        |      |    | 10.9 H1 histone family, member 2 [Homo sapiens]                  |
|               | HsFLAG-TCF3_Ti_10  | 3.2643 | 0.3269 | 1326.71 | 1327.564 | 6954.3  | 2 | 515.5  | 50   | 5  | R.KASGPPVSELITK.A                                                |
|               | HsFLAG-TCF3_Ti_10  | 4.9006 | 0.3748 | 1327.44 | 1327.564 | 7126.5  | 1 | 2047.7 | 87.5 | 16 | R.KASGPPVSELITK.A                                                |
|               | HsFLAG-ARP6_Ti_10  | 4.397  | 0.2266 | 1328.74 | 1327.564 | 4535.9  | 1 | 1145.4 | 56.2 | 1  | R.KASGPPVSELITK.A                                                |
|               | HsFlag-NUFIP_Ti_10 | 3.3729 | 0.2564 | 1198.14 | 1199.39  | 5929.5  | 1 | 866.6  | 77.3 | 68 | K.ASGPPVSELITK.A                                                 |
|               | HsFLAG-FLJ20309_   | 3.0382 | 0.2718 | 1198.52 | 1199.39  | 8477.2  | 3 | 646.4  | 59.1 | 6  | K.ASGPPVSELITK.A                                                 |
|               | HsFLAG-Lin9_Ti_20  | 3.0617 | 0.1302 | 847.04  | 846.015  | 3664.5  | 3 | 944    | 93.8 | 10 | R.SGVSLAALK.K                                                    |
|               | HsFLAG-p53-DNA-D   | 3.6663 | 0.1223 | 973.78  | 974.189  | 5265.2  | 3 | 1165.6 | 94.4 | 20 | R.SGVSLAALK.K.A                                                  |
|               | HsFLAG-p53-DNA-D   | 3.6718 | 0.3489 | 1235.52 | 1236.411 | 6430.2  | 1 | 1295.6 | 77.3 | 2  | K.KALAAAGYDVEK.N                                                 |
|               | HsFLAG-p53-DNA-D   | 4.871  | 0.4075 | 1236.42 | 1236.411 | 8171.8  | 1 | 2418   | 90.9 | 3  | K.KALAAAGYDVEK.N                                                 |
|               | HsFLAG-p53-DNA-D   | 4.9255 | 0.4111 | 1707.39 | 1707.884 | 8048    | 1 | 1885.7 | 70   | 3  | K.KALAAAGYDVEKNNSR.I                                             |
|               | HsFlag-FLJ20643_Ti | 3.4651 | 0.3974 | 1107.57 | 1108.236 | 9933.9  | 1 | 1436.6 | 75   | 24 | K.ALAAAGYDVEK.N                                                  |
|               | HsFLAG-ARP6_Ti_2   | 3.7074 | 0.3214 | 1108.09 | 1108.236 | 4889.2  | 1 | 1195.4 | 85   | 40 | K.ALAAAGYDVEK.N                                                  |
|               | HsFLAG-ARP6_Ti_10  | 4.1777 | 0.3647 | 1579.17 | 1579.71  | 7228.5  | 1 | 1615.9 | 75   | 4  | K.ALAAAGYDVEKNNSR.I                                              |
|               | HsVPS71-FLAG_Ti_10 | 3.6461 | 0.2615 | 1540.18 | 1539.729 | 5699.1  | 1 | 976.7  | 66.7 | 2  | K.GTLVQTKGTGASGSFK.L                                             |
|               | HsFLAG-ARP6_Ti_10  | 3.3753 | 0.2545 | 1167.29 | 1167.307 | 7149.1  | 1 | 1246.2 | 77.3 | 2  | K.GTGASGSFKLNK.K                                                 |
|               | HsFLAG-p53-DNA-D   | 2.2696 | 0.0973 | 987.61  | 987.144  | 3002.7  | 6 | 378.2  | 66.7 | 1  | K.KAASGEAKPK.V                                                   |



|             |                    |        |        |         |          |                                                                              |   |        |      |                                     |
|-------------|--------------------|--------|--------|---------|----------|------------------------------------------------------------------------------|---|--------|------|-------------------------------------|
| *           | HsFlag-NUFIP_Ti_11 | 2.2448 | 0.1097 | 670.43  | 670.83   | 3256.3                                                                       | 1 | 389.7  | 83.3 | 1 K.KPVGAAG.K                       |
| *           | HsFLAG-p53-DNA-D   | 2.2745 | 0.179  | 1085.8  | 1086.32  | 5371.5                                                                       | 4 | 414.8  | 55   | 1 K.AKKPAAATVTK.K                   |
| *           | HsFLAG-TCF3_Ti_10  | 2.5041 | 0.3169 | 886.53  | 887.067  | 4294.8                                                                       | 1 | 514.3  | 75   | 16 K.KPAAATVTK.K                    |
| gi 59859885 | 8                  | 59     | 39.70% | 295     | 32854    | 4.9 ribosomal protein SA [Homo sapiens]                                      |   |        |      |                                     |
| gi 9845502  | re                 | 8      | 59     | 39.70%  | 295      | 4.9 ribosomal protein SA [Homo sapiens]                                      |   |        |      |                                     |
|             | HsFlag-NUFIP_Ti_1C | 4.2588 | 0.3692 | 1204.09 | 1204.371 | 8028.8                                                                       | 1 | 1826.1 | 83.3 | 7 K.FAAATGATPIAGR.F                 |
|             | HsFlag-NUFIP_Ti_1C | 4.4753 | 0.5023 | 1699.48 | 1699.907 | 3408.4                                                                       | 1 | 560.3  | 71.4 | 8 R.FTPGFTFTNQIAAFR.E               |
|             | HsFlag-NUFIP_Ti_1C | 3.0509 | 0.2708 | 913.3   | 913.105  | 4232                                                                         | 2 | 978    | 92.9 | 1 R.LLVVTDPR.A                      |
|             | HsFlag-NUFIP_Ti_1C | 5.5581 | 0.4986 | 2997.06 | 2998.285 | 6353.2                                                                       | 1 | 838.2  | 44.2 | 10 R.ADHQPLTEASYVNLPTIALCNTDSPLR.Y  |
|             | HsFlag-NUFIP_Ti_1C | 5.9107 | 0.4253 | 2997.29 | 2998.285 | 8807.5                                                                       | 1 | 1816.3 | 36.5 | 19 R.ADHQPLTEASYVNLPTIALCNTDSPLR.Y  |
|             | HsFlag-NUFIP_Ti_1C | 3.4062 | 0.1796 | 1307.4  | 1307.455 | 4319.8                                                                       | 1 | 1167.2 | 90   | 4 R.YVDIAIPCNNK.G                   |
|             | HsFlag-NUFIP_Ti_11 | 5.1742 | 0.491  | 1614.93 | 1615.954 | 6401.2                                                                       | 1 | 1649.8 | 80.8 | 5 K.GAHSVGLMWWMLAR.E                |
|             | HsFlag-NUFIP_Ti_1C | 4.3065 | 0.3128 | 3580.45 | 3580.904 | 5891.4                                                                       | 1 | 320.2  | 22.3 | 5 R.EHPWEVMPDLYFYRDPEEIEKEEQAAAEK.A |
| gi 46367785 | 13                 | 79     | 39.50% | 390     | 43483    | 5.3 hypothetical protein LOC54934 [Homo sapiens]                             |   |        |      |                                     |
| *           | HsFlag-FLJ90652_2  | 5.1833 | 0.4423 | 2163.94 | 2164.43  | 8649.5                                                                       | 1 | 1985.8 | 68.4 | 2 K.KTNP GPVGETLLCQLSSYAK.T         |
| *           | HsFlag-FLJ90652_2  | 3.7518 | 0.3568 | 2036.71 | 2036.256 | 3280.7                                                                       | 1 | 711.1  | 72.2 | 1 K.TNP GPVGETLLCQLSSYAK.T          |
| *           | HsFlag-FLJ90652_2  | 3.1421 | 0.129  | 1292.24 | 1292.345 | 9102.6                                                                       | 1 | 1154   | 72.7 | 5 K.TELGSQTPESSR.S                  |
| *           | HsFLAG-FLJ20436_   | 4.9105 | 0.3529 | 2032.92 | 2034.008 | 5781.6                                                                       | 1 | 1943.5 | 72.2 | 2 R.GDPDSEADSIDSQEDPLK.H            |
| *           | HsFLAG-FLJ20436_   | 3.6118 | 0.2709 | 1255.42 | 1255.456 | 4037.3                                                                       | 6 | 691.1  | 83.3 | 10 R.LQSLYIDQFK.R                   |
| *           | HsFLAG-FLJ20436_   | 2.5692 | 0.1889 | 1255.48 | 1255.456 | 7946.3                                                                       | 6 | 577.6  | 61.1 | 2 R.LQSLYIDQFK.R                    |
| *           | HsFlag-FLJ90652_2  | 5.8026 | 0.5067 | 2149.25 | 2150.48  | 9305                                                                         | 1 | 2189.4 | 65   | 2 R.KVEHEALGSSLLTGPEGLLAK.E         |
| *           | HsFLAG-FLJ20436_   | 3.2203 | 0.4445 | 2022.5  | 2022.306 | 7513.5                                                                       | 1 | 723.2  | 47.4 | 4 K.VEHEALGSSLLTGPEGLLAK.E          |
| *           | HsFLAG-FLJ20436_   | 3.3282 | 0.3308 | 1058.43 | 1058.225 | 4994.1                                                                       | 1 | 1264.2 | 93.8 | 15 R.YGVEALLHR.Q                    |
| *           | HsFLAG-FLJ20436_   | 4.9716 | 0.4323 | 1573.59 | 1572.736 | 7235.6                                                                       | 1 | 1398.8 | 71.4 | 28 R.MLATDGAAQQAHTTR.S              |
| *           | HsFLAG-FLJ20436_   | 2.881  | 0.148  | 1096    | 1095.207 | 4094.9                                                                       | 1 | 1334.7 | 93.8 | 5 R.CLAFVDDVR.C                     |
| *           | HsFlag-FLJ90652_2  | 5.3515 | 0.45   | 2013.97 | 2015.209 | 11095.5                                                                      | 1 | 2045.6 | 73.3 | 2 R.HCLTHICQDTNQVLFK.C              |
| *           | HsFlag-FLJ90652_2  | 2.7851 | 0.4026 | 2185.24 | 2185.396 | 7814.8                                                                       | 1 | 434.1  | 38.6 | 1 K.ASAPLSQGLATANGKPEPTSIS.-        |
| gi 40217847 | 64                 | 254    | 39.40% | 2136    | 244505   | 6.1 activating signal cointegrator 1 complex subunit 3-like 1 [Homo sapiens] |   |        |      |                                     |
| *           | HsARP6-FLAG_Ti_1   | 3.2005 | 0.3349 | 1500.22 | 1500.692 | 9200.8                                                                       | 1 | 1053   | 69.2 | 2 R.RDEPTGEVLSLVGK.L                |
| *           | HsFlag-ZnF-HIT2_Ti | 5.8245 | 0.2867 | 2059.43 | 2057.312 | 10135.4                                                                      | 1 | 2096.4 | 45.8 | 2 R.RDEPTGEVLSLVGKLEGTR.M           |
| *           | HsFlag-ZnF-HIT2_Ti | 3.1803 | 0.2166 | 1426.15 | 1426.532 | 5682.4                                                                       | 8 | 582.1  | 70   | 1 R.KRDEDRHDINK.M                   |
| *           | HsFlag-ZnF-HIT2_Ti | 3.8549 | 0.3204 | 2227.47 | 2227.621 | 7000.3                                                                       | 1 | 751.8  | 50   | 1 K.GYTLLESEGIDEMVGIIYKPK.T         |
| *           | HsFLAG-p53-DNA-D   | 5.1975 | 0.468  | 2150.41 | 2151.424 | 8847.5                                                                       | 1 | 1998.7 | 63.9 | 26 R.ETYEVL LLSFIQAALGDQPR.D        |
| *           | HsFlag-ZnF-HIT2_Ti | 4.8369 | 0.4048 | 2150.55 | 2151.424 | 7502.9                                                                       | 1 | 1355.4 | 40.3 | 13 R.ETYEVL LLSFIQAALGDQPR.D        |
| *           | HsFlag-ZnF-HIT2_Ti | 5.3757 | 0.345  | 1588.44 | 1587.82  | 6983.1                                                                       | 1 | 2464.1 | 89.3 | 19 R.DILCGAADEV L AVLK.N            |
| *           | HsFlag-ZnF-HIT2_Ti | 3.7203 | 0.3434 | 1489.03 | 1489.623 | 6529.9                                                                       | 1 | 1218.4 | 79.2 | 3 K.EIDLLLGQTDDTR.Y                 |
| *           | HsFlag-ZnF-HIT2_Ti | 2.9074 | 0.2354 | 1042.47 | 1043.254 | 4901                                                                         | 4 | 636    | 75   | 2 R.YHVLVNLGK.K                     |
| *           | HsFlag-ZnF-HIT2_Ti | 2.6404 | 0.2825 | 996.4   | 997.093  | 4160                                                                         | 2 | 507.7  | 68.8 | 1 K.KITDYGGDK.E                     |
| *           | HsFlag-ZnF-HIT2_Ti | 2.6401 | 0.1695 | 997.62  | 997.093  | 4423.9                                                                       | 6 | 742    | 87.5 | 1 K.KITDYGGDK.E                     |
| *           | HsFlag-ZnF-HIT2_Ti | 3.5838 | 0.2387 | 1158.77 | 1158.381 | 5882.9                                                                       | 2 | 1192.2 | 88.9 | 1 K.KADEVLEILK.T                    |
| *           | HsFLAG-p53-DNA-D   | 3.4438 | 0.4608 | 1934.05 | 1935.187 | 8367.3                                                                       | 1 | 1161.7 | 64.3 | 1 K.FLYQLHETEKEDLIR.E               |
| *           | HsFlag-ZnF-HIT2_Ti | 3.7079 | 0.2984 | 2349.96 | 2349.605 | 7083.4                                                                       | 1 | 813.2  | 38.2 | 1 K.FLYQLHETEKEDLIREER.S            |
| *           | HsFlag-DPCD_Ti_20  | 5.1411 | 0.4849 | 2179.27 | 2179.378 | 10246.2                                                                      | 1 | 2287.1 | 65.8 | 1 R.MDTDLETMDLDQGG EALAPR.Q         |

|   |                    |        |        |         |          |         |   |        |      |                                        |
|---|--------------------|--------|--------|---------|----------|---------|---|--------|------|----------------------------------------|
| * | HsFlag-ZnF-HIT2_Ti | 4.6489 | 0.2993 | 2293.35 | 2293.599 | 8480.4  | 1 | 933.1  | 35.5 | 2 R.QVLDLEDLVFTQGSHFMANK.R             |
| * | HsFlag-ZnF-HIT2_Ti | 5.335  | 0.3288 | 2293.69 | 2293.599 | 6891.9  | 1 | 880.2  | 55.3 | 2 R.QVLDLEDLVFTQGSHFMANK.R             |
| * | HsFlag-ZnF-HIT2_Ti | 3.1308 | 0.2534 | 1236.41 | 1236.339 | 3944.7  | 1 | 737.8  | 88.9 | 3 K.RCQLPDGSFR.R                       |
| * | HsFlag-NUFIP_Ti_2C | 3.8386 | 0.2707 | 2921.83 | 2922.351 | 7621.7  | 1 | 782.6  | 29   | 1 K.GYEEVHVPALKPKPGFSEEQLLPVEK.L       |
| * | HsFlag-ZnF-HIT2_Ti | 3.0733 | 0.318  | 2922.15 | 2922.351 | 7152.5  | 1 | 415.8  | 36   | 1 K.GYEEVHVPALKPKPGFSEEQLLPVEK.L       |
| * | HsScrap_Ti_102.186 | 2.0827 | 0.3085 | 1117.31 | 1118.234 | 7089.3  | 5 | 419.4  | 61.1 | 1 K.YAQAGFEGFK.T                       |
| * | HsFLAG-Lin9_Ti_20  | 4.6499 | 0.3088 | 1944.5  | 1945.143 | 8962.6  | 1 | 1342.5 | 55.6 | 9 R.AALETDENLLLCAPTGAGK.T              |
|   | HsFlag-ZnF-HIT2_Ti | 4.5812 | 0.4214 | 1281.58 | 1282.497 | 7970.8  | 1 | 2003.2 | 86.4 | 3 R.SLVQEMVGSFGK.R                     |
|   | HsSrcap_Ti_202.417 | 4.661  | 0.4043 | 2094.69 | 2094.415 | 3106.6  | 1 | 900.8  | 77.8 | 17 R.LIGLSATLPNYEDVATFLR.V             |
|   | HsFlag-ZnF-HIT2_Ti | 4.3858 | 0.3971 | 2821.23 | 2822.19  | 7903.4  | 1 | 744    | 41.3 | 5 K.GLFYFDNSFRPVPLEQTYVGITEK.K         |
|   | HsFLAG-UTX1_Ti_2i  | 5.6592 | 0.3751 | 2821.4  | 2822.19  | 10070   | 1 | 1296.9 | 32.6 | 12 K.GLFYFDNSFRPVPLEQTYVGITEK.K        |
|   | HsFlag-ZnF-HIT2_Ti | 3.4992 | 0.3033 | 1199.48 | 1199.398 | 7284.2  | 3 | 1333.5 | 83.3 | 7 K.NQVLVVFHSR.K                       |
|   | HsFlag-ZnF-HIT2_Ti | 3.6542 | 0.3634 | 1799.71 | 1800.088 | 6055.5  | 1 | 941    | 60   | 2 K.DLLPYGFAIHHAGMTR.V                 |
|   | HsFlag-ZnF-HIT2_Ti | 4.2348 | 0.2839 | 1716.62 | 1717.036 | 4287.9  | 1 | 563.9  | 67.9 | 4 R.WTELGALDILQMLGR.A                  |
|   | HsFlag-VPS71_Ti_1C | 5.2983 | 0.3652 | 1942.03 | 1940.265 | 9674.2  | 1 | 1963   | 64.7 | 5 K.LPDMMLNAEIVLGNVQNAK.D              |
|   | HsFlag-ZnF-HIT2_Ti | 3.2966 | 0.2684 | 1446.27 | 1446.6   | 8082.9  | 1 | 955.9  | 66.7 | 2 R.SPTLYGISHDDLK.G                    |
|   | HsFlag-ZnF-HIT2_Ti | 4.8544 | 0.4061 | 2341.6  | 2341.583 | 8221.5  | 1 | 1346.1 | 37.5 | 2 R.SPTLYGISHDDLKGDPLLDQR.R            |
|   | HsFlag-VPS71_Ti_1C | 3.97   | 0.3151 | 1596.78 | 1596.929 | 7252.6  | 1 | 1311.2 | 76.9 | 1 R.RLDLVHTAALMLDK.N                   |
|   | HsFlag-ZnF-HIT2_Ti | 3.5283 | 0.1732 | 1350.43 | 1350.517 | 7811.2  | 1 | 1169.5 | 72.7 | 5 K.KTGNFQVTELGR.I                     |
|   | HsFlag-ZnF-HIT2_Ti | 3.2068 | 0.3482 | 1222.54 | 1222.343 | 8112.7  | 1 | 929.8  | 70   | 1 K.TGNFQVTELGR.I                      |
|   | HsFlag-ZnF-HIT2_Ti | 6.2146 | 0.4972 | 3571.87 | 3573.04  | 7081.7  | 1 | 1129.6 | 31   | 4 R.IASHYYITNDTVQTYNQLLKPTLSEIELFR.V   |
|   | HsFlag-ZnF-HIT2_Ti | 5.0097 | 0.4404 | 1699.58 | 1699.904 | 9260.6  | 1 | 2422.5 | 84.6 | 11 R.LYDLNHNEIGELIR.M                  |
|   | HsARP6-FLAG_Ti_1i  | 3.3164 | 0.2047 | 1407.54 | 1406.668 | 7085.6  | 1 | 987.4  | 72.7 | 3 K.LELSVHLQPITR.S                     |
|   | HsFlag-VPS71_Ti_1C | 3.3279 | 0.2043 | 1721.66 | 1721.904 | 4008.4  | 1 | 644    | 69.2 | 2 K.VELTITPDFQWDEK.V                   |
|   | HsFlag-ZnF-HIT2_Ti | 5.3994 | 0.2815 | 3067.78 | 3068.544 | 6281.9  | 1 | 864.3  | 32.3 | 8 K.YAQDEHLITFFVPVFEPLPPQYFIR.V        |
|   | HsSrcap_Ti_205.489 | 3.7977 | 0.2724 | 3070.04 | 3068.544 | 5046.9  | 1 | 705.3  | 43.8 | 3 K.YAQDEHLITFFVPVFEPLPPQYFIR.V        |
|   | HsFLAG-p53-DNA-D   | 3.9309 | 0.4356 | 1624.66 | 1623.815 | 5927.1  | 1 | 1162.6 | 79.2 | 5 R.WLSCETQLPVFSFR.H                   |
|   | HsFlag-VPS71_Ti_1C | 4.4633 | 0.3654 | 2120.87 | 2120.497 | 6754.3  | 1 | 1195.8 | 61.1 | 10 K.YPPPTELLDLQPLPVSA LR.N            |
|   | HsScrap_Ti_102.197 | 2.6165 | 0.374  | 1301.33 | 1302.383 | 3434.6  | 1 | 298.9  | 65   | 2 R.NSAFESLYQDK.F                      |
|   | HsFLAG-UTX1_Ti_2i  | 4.1336 | 0.1884 | 3508.48 | 3509.856 | 7589.6  | 1 | 680.2  | 24.2 | 1 K.FPFFNPIQTQVFNTVYNSDDNVFVGAPTSGSK.T |
| * | HsFlag-ZnF-HIT2_Ti | 5.6492 | 0.5402 | 2639.72 | 2640.991 | 9523.1  | 1 | 2122.3 | 62.5 | 4 R.CVYITPMEALAEQVYMDWYEK.F            |
|   | HsARP6-FLAG_Ti_1i  | 2.5271 | 0.2176 | 1376.78 | 1376.59  | 6200.2  | 1 | 890.9  | 75   | 1 K.VVLLTGETSTDLK.L                    |
|   | HsFlag-ZnF-HIT2_Ti | 3.7522 | 0.3695 | 1843.51 | 1843.133 | 5854.3  | 1 | 818.6  | 60   | 4 K.GNIISTPEKWDILSR.R                  |
|   | HsFlag-ZnF-HIT2_Ti | 3.8888 | 0.2258 | 3337.3  | 3335.751 | 7687.1  | 1 | 713    | 25.9 | 2 K.NVQINILFVDEVHLIGGENGPVLEVICSR.M    |
| * | HsFlag-ZnF-HIT2_Ti | 2.8452 | 0.0953 | 929.41  | 929.107  | 3121    | 1 | 726.5  | 92.9 | 1 K.PVYHAITK.H                         |
|   | HsFlag-ZnF-HIT2_Ti | 3.4364 | 0.2942 | 1141.89 | 1142.43  | 6661.8  | 1 | 1298.6 | 88.9 | 3 K.KPVIVFVPSR.K                       |
|   | HsARP6-FLAG_Ti_1i  | 2.7164 | 0.2849 | 1776.76 | 1776.006 | 9443    | 4 | 577.5  | 46.7 | 1 R.LTAIDILTCAADIQR.Q                  |
|   | HsFLAG-p53-DNA-D   | 2.088  | 0.1135 | 934.36  | 935.034  | 5049.7  | 9 | 486.6  | 75   | 3 R.FLHCTEK.D                          |
|   | HsFLAG-p53-DNA-D   | 2.6665 | 0.2833 | 1791.71 | 1792.001 | 8966.3  | 2 | 459.3  | 50   | 2 K.QDAVDYLTWTFLYR.R                   |
|   | HsSrcap_Ti_204.184 | 4.3585 | 0.4584 | 1936.36 | 1937.14  | 7963.3  | 1 | 1270.5 | 66.7 | 7 R.MTQNPNYNLQGISHR.H                  |
|   | HsFLAG-p53-DNA-D   | 5.0855 | 0.3322 | 2409.07 | 2409.612 | 10887.7 | 1 | 2532.3 | 42.5 | 1 R.HLSDHLSSELVEQTLSDLEQSK.C           |
|   | HsFLAG-p53-DNA-D   | 4.3068 | 0.2607 | 2410.24 | 2409.612 | 10810.4 | 1 | 1709.8 | 55   | 1 R.HLSDHLSSELVEQTLSDLEQSK.C           |
|   | HsARP6-FLAG_Ti_1i  | 2.5799 | 0.373  | 2015.98 | 2016.302 | 5224.5  | 1 | 336.4  | 44.1 | 2 R.GLIEISNAAEYENIPIR.H                |

|                |                    |        |        |         |          |                                                                               |   |        |      |                                         |
|----------------|--------------------|--------|--------|---------|----------|-------------------------------------------------------------------------------|---|--------|------|-----------------------------------------|
|                | HsFLAG-Lin9_Ti_20  | 3.8218 | 0.2643 | 1265.94 | 1266.486 | 6792                                                                          | 2 | 1434.8 | 85   | 4 K.TNLLLQAHLSR.M                       |
|                | HsARP6-FLAG_Ti_1   | 5.3565 | 0.4009 | 1729.19 | 1728.943 | 7800.9                                                                        | 1 | 2035.4 | 76.7 | 3 R.NALLQLTDSQIADVAR.F                  |
|                | HsFlag-ZnF-HIT2_Ti | 4.8145 | 0.3945 | 2146.69 | 2147.358 | 9168.9                                                                        | 1 | 2760.3 | 75   | 2 R.FCNRYPNIELSYEVVDK.D                 |
|                | HsFlag-ZnF-HIT2_Ti | 4.3897 | 0.2296 | 1570.66 | 1569.752 | 7721.5                                                                        | 1 | 1572.9 | 83.3 | 1 R.YPNIELSYEVVDK.D                     |
|                | HsFlag-DPCD_Ti_20  | 2.941  | 0.27   | 1354.64 | 1353.605 | 8161.2                                                                        | 4 | 586    | 54.2 | 1 R.SGGPVVVVLVQLER.E                    |
|                | HsSrcap_Ti_204.436 | 3.6337 | 0.2291 | 3089.94 | 3089.602 | 7912.4                                                                        | 1 | 621.7  | 33.9 | 2 R.SGGPVVVVLVQLEREEEEVTGPVIAPLFPQK.R   |
| gij 10863927 r | 6                  | 18     | 39.40% | 165     | 18012    | 7.8 peptidylprolyl isomerase A isoform 1 [Homo sapiens]                       |   |        |      |                                         |
| gij 89058333 r | 6                  | 18     | 29.30% | 222     | 24517    | 7.4 PREDICTED: similar to peptidylprolyl isomerase A isoform 1 [Homo sapiens] |   |        |      |                                         |
| gij 89058151 r | 6                  | 18     | 29.30% | 222     | 24517    | 7.4 PREDICTED: similar to peptidylprolyl isomerase A isoform 1 [Homo sapiens] |   |        |      |                                         |
| gij 56847632 r | 6                  | 18     | 39.40% | 165     | 17998    | 7.8 peptidylprolyl isomerase A-like [Homo sapiens]                            |   |        |      |                                         |
|                | HsFLAG-p53-DNA-D   | 2.9499 | 0.1615 | 1055.43 | 1056.203 | 8045                                                                          | 2 | 1014.4 | 75   | 2 R.VSFELFADK.V                         |
|                | HsFlag-VPS71_Ti_1  | 3.1335 | 0.1359 | 1056.34 | 1056.203 | 4341                                                                          | 1 | 902.5  | 87.5 | 1 R.VSFELFADK.V                         |
|                | HsFLAG-p53-DNA-D   | 2.6769 | 0.3203 | 1598.5  | 1599.811 | 2545.3                                                                        | 1 | 252.6  | 65.4 | 2 R.IIPGFMCQGGDFTR.H                    |
|                | HsFlag-VPS71_Ti_1  | 4.5369 | 0.4051 | 1833.43 | 1833.048 | 6087.3                                                                        | 1 | 1085.6 | 67.9 | 7 K.SIYGKEKFEDENFILK.H                  |
|                | HsFlag-VPS71_Ti_1  | 3.9824 | 0.4562 | 2791.88 | 2793.093 | 7977                                                                          | 1 | 788.1  | 40.4 | 1 K.HTGPGILSMANAGPNTNGSQFFICTAK.T       |
|                | HsFLAG-p53-DNA-D   | 5.0583 | 0.344  | 2794.97 | 2793.093 | 9340.7                                                                        | 1 | 1339.6 | 29.8 | 5 K.HTGPGILSMANAGPNTNGSQFFICTAK.T       |
| gij 7657351 re | 42                 | 236    | 39.30% | 1328    | 148850   | 9.2 MYB binding protein 1a [Homo sapiens]                                     |   |        |      |                                         |
| *              | HsFLAG-p53-DNA-D   | 4.0042 | 0.3855 | 2171.04 | 2172.401 | 7369.1                                                                        | 1 | 867.8  | 56.2 | 13 R.EFLDFFWDIAKPEQETR.L                |
| *              | HsFlag-DPCD_Ti_20  | 6.4704 | 0.4222 | 3865.73 | 3865.348 | 7493.1                                                                        | 1 | 1516.2 | 31.2 | 7 R.ETARPCYSLALAQLLQSFEDLPLCSILQQIQEK.Y |
| *              | HsFLAG-Lin9_Ti_20  | 5.3355 | 0.4318 | 2051.15 | 2051.313 | 8308.2                                                                        | 1 | 1513.8 | 65.6 | 14 K.LLQALAQYQNHLEQPR.K                 |
| *              | HsFLAG-UTX1_Ti_2   | 4.3767 | 0.2907 | 2051.83 | 2051.313 | 6093.7                                                                        | 1 | 1366.4 | 45.3 | 4 K.LLQALAQYQNHLEQPR.K                  |
| *              | HsFLAG-p53-DNA-D   | 4.4662 | 0.3122 | 1302.6  | 1302.554 | 6854.5                                                                        | 1 | 1519.7 | 81.8 | 2 R.KALVDILSEVSK.A                      |
| *              | HsFLAG-Lin9_Ti_20  | 4.0556 | 0.3152 | 1174.01 | 1174.38  | 7908.8                                                                        | 1 | 1857.8 | 85   | 2 K.ALVDILSEVSK.A                       |
| *              | HsFLAG-p53-DNA-D   | 3.9904 | 0.2668 | 1354.43 | 1354.63  | 6235.7                                                                        | 2 | 1013.8 | 72.7 | 8 K.ATLQEILPEVLK.A                      |
| *              | HsFLAG-p53-DNA-D   | 4.9046 | 0.4418 | 2483.78 | 2484.896 | 6643.3                                                                        | 1 | 1022.4 | 52.4 | 11 K.ADLNIISSPEQLELFLLAQQK.V            |
| *              | HsFLAG-FLJ20309_   | 5.6719 | 0.4221 | 2485.31 | 2484.896 | 10458.1                                                                       | 1 | 1587.5 | 35.7 | 12 K.ADLNIISSPEQLELFLLAQQK.V            |
| *              | HsFLAG-Lin9_Ti_20  | 5.2884 | 0.452  | 1774.54 | 1775.015 | 7528.5                                                                        | 1 | 2532.6 | 80   | 7 K.KLVGSVNLFSDENVPR.L                  |
| *              | HsFLAG-Lin9_Ti_20  | 3.7385 | 0.3513 | 1646.77 | 1646.841 | 7184.9                                                                        | 1 | 1347   | 71.4 | 2 K.LVGSVNLFSDENVPR.L                   |
| *              | HsFLAG-BC014022_   | 2.9306 | 0.1856 | 1224.28 | 1223.545 | 4427.9                                                                        | 1 | 669.8  | 80   | 2 R.KLPAIALDLLR.L                       |
| *              | HsFLAG-Lin9_Ti_20  | 3.446  | 0.1961 | 1095.44 | 1095.371 | 6606.3                                                                        | 1 | 1236.6 | 88.9 | 4 K.LPAIALDLLR.L                        |
| *              | HsFlag-NUFIP_Ti_2  | 2.8944 | 0.3142 | 1201.95 | 1202.278 | 5883.2                                                                        | 2 | 706.5  | 77.8 | 1 R.HYGEHVCTAK.L                        |
| *              | HsFLAG-Lin9_Ti_20  | 4.1715 | 0.492  | 1717.76 | 1719.039 | 3717.1                                                                        | 1 | 681.4  | 71.4 | 13 R.FLSPALQGYVAWLR.A                   |
| *              | HsFLAG-FLJ20729_   | 3.5817 | 0.2676 | 2283.38 | 2284.546 | 10168.7                                                                       | 2 | 938.1  | 31.6 | 1 R.AMFLQPDLDSLVDLSTNNQK.K              |
| *              | HsFLAG-p53-DNA-D   | 5.1606 | 0.4385 | 2285    | 2284.546 | 4805.5                                                                        | 1 | 1145.6 | 65.8 | 4 R.AMFLQPDLDSLVDLSTNNQK.K              |
| *              | HsFlag-DPCD_Ti_20  | 2.8771 | 0.1635 | 1271.2  | 1271.39  | 6270.3                                                                        | 1 | 900.8  | 70   | 1 K.AQDSSLHMPER.A                       |
| *              | HsFLAG-p53-DNA-D   | 3.4148 | 0.2859 | 1129.4  | 1129.299 | 7637                                                                          | 1 | 1468.9 | 88.9 | 3 K.KPTSQIPETK.H                        |
| *              | HsFLAG-Lin9_Ti_20  | 2.3207 | 0.1979 | 1443.44 | 1443.605 | 4038.8                                                                        | 1 | 197.5  | 50   | 2 K.HPFSFPLENQAR.E                      |
| *              | HsFLAG-BC014022_   | 2.7479 | 0.1536 | 1444.4  | 1443.605 | 3337.8                                                                        | 2 | 251.5  | 50   | 6 K.HPFSFPLENQAR.E                      |
| *              | HsFLAG-FLJ20309_   | 5.554  | 0.5064 | 2104.8  | 2105.395 | 11138.1                                                                       | 1 | 2049.8 | 61.1 | 53 R.EAVSSAFFSLLQLTSTQFK.Q              |
| *              | HsFLAG-Lin9_Ti_20  | 4.6741 | 0.2868 | 2105.17 | 2105.395 | 10040.7                                                                       | 1 | 1222.5 | 36.1 | 1 R.EAVSSAFFSLLQLTSTQFK.Q               |
| *              | HsFlag-DPCD_Ti_20  | 4.885  | 0.4531 | 1936.6  | 1936.058 | 7674.8                                                                        | 1 | 1492.4 | 65.6 | 3 K.SPAESCDLLGDIQTCIR.K                 |
| *              | HsFLAG-p53-DNA-D   | 4.1348 | 0.3158 | 1511.18 | 1511.69  | 7573.5                                                                        | 1 | 1138.2 | 70.8 | 6 R.SVFGHICSHLTPR.A                     |
| *              | HsFLAG-Lin9_Ti_20  | 4.0624 | 0.3814 | 2285.36 | 2285.47  | 6484.9                                                                        | 1 | 1066.9 | 55.3 | 5 R.ALQLILDVNLNPETSEENDR.V              |

|              |                    |        |        |         |          |         |                                                                          |        |      |                                      |
|--------------|--------------------|--------|--------|---------|----------|---------|--------------------------------------------------------------------------|--------|------|--------------------------------------|
| *            | HsFLAG-Lin9_Ti_20  | 3.8548 | 0.2391 | 3557.45 | 3557.807 | 11317.3 | 4                                                                        | 550.4  | 20.8 | 1 R.ALQLILDVLPETSEEDNDRVVVTDDSDERR.L |
| *            | HsFLAG-FLJ20309_   | 4.6929 | 0.3225 | 1228.52 | 1228.515 | 6751.1  | 1                                                                        | 1714.2 | 90   | 6 R.VLDLVEVLVTK.Q                    |
| *            | HsFLAG-Lin9_Ti_20  | 4.7664 | 0.1786 | 2161.45 | 2161.59  | 7371.4  | 1                                                                        | 1544   | 43.1 | 5 K.QPENALVLELLEPLLSIIR.R            |
| *            | HsFLAG-Lin9_Ti_20  | 4.2085 | 0.29   | 2161.62 | 2161.59  | 9533.6  | 1                                                                        | 1189.5 | 55.6 | 6 K.QPENALVLELLEPLLSIIR.R            |
| *            | HsFLAG-p53-DNA-D   | 3.347  | 0.2521 | 1084.21 | 1084.232 | 7563.3  | 2                                                                        | 1146.5 | 92.9 | 4 R.IFTHHLCR.A                       |
| *            | HsFLAG-FLJ20309_   | 3.0364 | 0.2777 | 1052.43 | 1052.178 | 6431.6  | 1                                                                        | 775.8  | 77.8 | 5 R.AGALHAQVER.L                     |
| *            | HsFLAG-FLJ20729_   | 3.9785 | 0.3295 | 2959.9  | 2960.365 | 11944.7 | 1                                                                        | 943.8  | 28   | 1 R.LVQQAGRQPDSPALYHFNASLYLLR.V      |
| *            | HsARP6-FLAG_Ti_1   | 3.59   | 0.3674 | 1317.18 | 1317.525 | 6553.6  | 1                                                                        | 1219.2 | 81.8 | 3 R.VYSTALSSFLTK.R                   |
| *            | HsFLAG-p53-DNA-D   | 2.713  | 0.2666 | 1709.8  | 1710.044 | 3924    | 1                                                                        | 769.9  | 71.4 | 1 R.NSPLTVPMFLSLFSR.H                |
| *            | HsFLAG-Lin9_Ti_20  | 3.3832 | 0.206  | 1111.23 | 1111.296 | 6319.1  | 1                                                                        | 1031.7 | 87.5 | 4 R.HQACLLLQK.T                      |
| *            | HsFLAG-p53-DNA-D   | 6.5532 | 0.4141 | 2068.07 | 2068.384 | 9303.9  | 1                                                                        | 2772.5 | 76.5 | 5 K.AHQQALSSLELLNVLFR.T              |
| *            | HsFLAG-Lin9_Ti_20  | 4.1468 | 0.3694 | 3137.4  | 3137.52  | 5298.4  | 2                                                                        | 415.6  | 25.9 | 1 K.LTDLTVLLGVLQGGQSLQGAHSTGSSR.L    |
| *            | HsFLAG-p53-DNA-D   | 3.2046 | 0.0997 | 1305.36 | 1305.537 | 5107.6  | 1                                                                        | 830.2  | 77.8 | 2 R.LHDLYWQAMK.T                     |
| *            | HsFLAG-FLJ20309_   | 3.8799 | 0.3682 | 2375.12 | 2374.455 | 7547.5  | 1                                                                        | 818.5  | 45.8 | 1 K.SEDGTPAEDGTPAATGGSQPPSMGR.K      |
| *            | HsFLAG-p53-DNA-D   | 5.0442 | 0.424  | 2092.62 | 2093.261 | 6526.7  | 1                                                                        | 986.7  | 55   | 2 K.NQKPSQVNGAPGSPTEPAGQK.Q          |
| *            | HsFLAG-p53-DNA-D   | 2.601  | 0.1929 | 987.56  | 988.129  | 6492.6  | 1                                                                        | 551.6  | 66.7 | 2 R.SPSELLQSGAK.K                    |
| gij 39725938 | 41                 | 173    | 39.20% | 1390    | 155641   | 8.5     | polymerase (RNA) III (DNA directed) polypeptide A, 155kDa [Homo sapiens] |        |      |                                      |
| *            | HsFlag-FLJ20643_Ti | 2.5048 | 0.1195 | 1138.57 | 1138.312 | 3016.7  | 1                                                                        | 386.4  | 83.3 | 1 R.QQAHIQVVSK.N                     |
| *            | HsFlag-NUFIP_Ti_1C | 4.9698 | 0.3903 | 2353.98 | 2354.587 | 9691.8  | 1                                                                        | 972.9  | 47.4 | 3 K.NLYSQDNQHAPLLYGVDHR.M            |
| *            | HsFlag-NUFIP_Ti_1C | 4.6682 | 0.3907 | 2354.08 | 2354.587 | 5778.4  | 1                                                                        | 822.8  | 39.5 | 6 K.NLYSQDNQHAPLLYGVDHR.M            |
| *            | HsFlag-NUFIP_Ti_11 | 2.9496 | 0.1388 | 1076.36 | 1076.284 | 5610.7  | 1                                                                        | 814.4  | 87.5 | 4 K.RPGLTYLQK.R                      |
| *            | HsFlag-NUFIP_Ti_11 | 3.6077 | 0.3942 | 1615.44 | 1615.721 | 8842.1  | 1                                                                        | 1368.5 | 69.2 | 2 K.NICHHCAGFNGTVK.K                 |
| *            | HsFlag-NUFIP_Ti_1C | 4.2795 | 0.3989 | 2387.86 | 2388.682 | 6704.1  | 1                                                                        | 1108.2 | 57.5 | 3 K.VVDPIVSNFLQSFETAIEHNK.E          |
| *            | HsFLAG-p53-DNA-D   | 4.904  | 0.4109 | 1712.8  | 1713.03  | 5623.2  | 1                                                                        | 1142   | 71.4 | 15 R.AQENLNPLVVLNLFK.R               |
| *            | HsFlag-NUFIP_Ti_11 | 6.6801 | 0.4593 | 2859.94 | 2860.385 | 6449.3  | 1                                                                        | 1725.3 | 41   | 13 K.RIPAEDVPLLLMNPEAGKPSDLILTR.L    |
| *            | HsFlag-NUFIP_Ti_1C | 4.7156 | 0.4315 | 2860.74 | 2860.385 | 7088.6  | 1                                                                        | 757.3  | 42   | 2 K.RIPAEDVPLLLMNPEAGKPSDLILTR.L     |
| *            | HsFlag-NUFIP_Ti_1C | 4.998  | 0.4281 | 2703.77 | 2704.197 | 4338.7  | 1                                                                        | 850.3  | 35.4 | 2 R.IPAEDVPLLLMNPEAGKPSDLILTR.L      |
| *            | HsFlag-NUFIP_Ti_11 | 3.2238 | 0.2322 | 1906.25 | 1907.314 | 3988.3  | 1                                                                        | 732.3  | 65.6 | 6 R.LLVPLLCIRPSVVSCLK.S              |
| *            | HsFlag-FLJ20643_Ti | 2.6083 | 0.1853 | 1212.1  | 1211.286 | 7441.1  | 6                                                                        | 691.7  | 65   | 1 K.SGTNEDDLTMK.L                    |
| *            | HsFlag-FLJ20643_Ti | 3.6014 | 0.2329 | 1278.41 | 1277.506 | 4457.2  | 4                                                                        | 686.6  | 68.2 | 8 R.IDEVAVPVHVAK.I                   |
| *            | HsFlag-FLJ20643_Ti | 2.5367 | 0.0812 | 848.43  | 847.993  | 5894.6  | 5                                                                        | 766.4  | 91.7 | 1 K.ANINFLR.K                        |
| *            | HsFlag-NUFIP_Ti_1C | 4.6754 | 0.4497 | 2004.75 | 2005.244 | 4463.1  | 1                                                                        | 1039.4 | 70.6 | 18 K.LVQNGPEVHPGANFIQQR.H            |
| *            | HsFlag-ZnF-HIT2_Ti | 3.9056 | 0.2795 | 2005.18 | 2005.244 | 6727.2  | 1                                                                        | 852    | 41.2 | 2 K.LVQNGPEVHPGANFIQQR.H             |
| *            | HsFlag-NUFIP_Ti_1C | 3.8371 | 0.277  | 1398.75 | 1398.605 | 5345.1  | 1                                                                        | 1265.9 | 86.4 | 1 R.HLIDGDVVLVFN.R                   |
| *            | HsFlag-NUFIP_Ti_11 | 3.4082 | 0.2359 | 1013.57 | 1012.258 | 5719.3  | 1                                                                        | 941.8  | 87.5 | 3 K.LSIMAHLAR.V                      |
| *            | HsFlag-NUFIP_Ti_1C | 4.9674 | 0.3461 | 3447.23 | 3446.612 | 5446.4  | 1                                                                        | 631    | 28.6 | 2 R.FNECVCTPYNADFDGDEMNLHLPQTEEAK.A  |
| *            | HsFlag-NUFIP_Ti_11 | 6.7302 | 0.473  | 2363.64 | 2362.772 | 6796.4  | 1                                                                        | 2286   | 66.7 | 15 R.NGEPLIAAIQDFLTGAYLLTLK.D        |
| *            | HsFlag-FLJ20643_Ti | 2.5792 | 0.1821 | 1646.16 | 1645.903 | 8628.2  | 1                                                                        | 568.7  | 50   | 1 K.ACQIIASILVGKDEK.I                |
| *            | HsFlag-NUFIP_Ti_11 | 2.7108 | 0.1256 | 1134.58 | 1134.451 | 6010.6  | 2                                                                        | 898.9  | 77.8 | 1 K.VRLPPPTILK.P                     |
| *            | HsFlag-FLJ20643_Ti | 2.5062 | 0.0948 | 903.05  | 902.081  | 2977    | 6                                                                        | 466.8  | 85.7 | 1 K.PVTLWTGK.Q                       |
| *            | HsFlag-FLJ20643_Ti | 2.7268 | 0.3875 | 1033.46 | 1033.216 | 2923.6  | 1                                                                        | 470.7  | 81.2 | 1 R.LAPVYLSNR.G                      |
| *            | HsFLAG-UTX1_Ti_2   | 3.3262 | 0.4033 | 1659.22 | 1659.923 | 5750.2  | 1                                                                        | 690.9  | 56.2 | 1 R.GFSIGIGDVTPQGGLLK.A              |
| *            | HsFlag-FLJ20643_Ti | 3.5131 | 0.2368 | 1541.11 | 1541.664 | 8876.9  | 1                                                                        | 1588.9 | 70.8 | 2 K.KCDEYIEALNTGK.L                  |

|                |                      |        |        |         |          |         |   |        |      |    |                                                                             |
|----------------|----------------------|--------|--------|---------|----------|---------|---|--------|------|----|-----------------------------------------------------------------------------|
| *              | HsFlag-NUFIP_Ti_1C   | 4.7152 | 0.3554 | 2142.35 | 2143.408 | 3750.2  | 1 | 723.6  | 63.9 | 13 | K.LQQQPCTAETLEALILK.E                                                       |
| *              | HsFlag-FLJ20643_Ti   | 5.6855 | 0.3344 | 2326.73 | 2325.611 | 7861.9  | 1 | 3031.2 | 71.4 | 6  | K.GSFINISQMIACVGGQQAISGSR.V                                                 |
| *              | HsFlag-NUFIP_Ti_11   | 4.7636 | 0.3653 | 2685.08 | 2686.016 | 7909.4  | 1 | 1792.4 | 40.2 | 8  | K.GFVANSFYSLTPTTEFFHTMAGR.E                                                 |
| *              | HsFlag-NUFIP_Ti_11   | 4.017  | 0.3941 | 2685.24 | 2686.016 | 5629.2  | 1 | 433.9  | 34.8 | 6  | K.GFVANSFYSLTPTTEFFHTMAGR.E                                                 |
| *              | HsFlag-NUFIP_Ti_1C   | 2.768  | 0.2473 | 1699.21 | 1699.821 | 7844.2  | 1 | 749.4  | 61.5 | 1  | K.SLEDLCSQYDLTVR.S                                                          |
| *              | HsFlag-ZnF-HIT2_Ti   | 2.5292 | 0.3527 | 2032.8  | 2033.218 | 8647.8  | 1 | 425    | 43.3 | 1  | K.KSEFLCCQDSFLQEIK.K                                                        |
| *              | HsFlag-NUFIP_Ti_1C   | 5.1139 | 0.505  | 2732.84 | 2734.078 | 7629.6  | 1 | 1371.3 | 46.2 | 1  | R.AQMEPGSAVGALCAQSIGEPGTQMTLK.T                                             |
| *              | HsFlag-NUFIP_Ti_1C   | 2.858  | 0.1647 | 1992.99 | 1991.264 | 6115    | 1 | 655.4  | 52.8 | 3  | R.VKPGDVAVHGEAVVCVTPR.E                                                     |
| *              | HsFLAG-p53-DNA-D     | 4.3352 | 0.2732 | 1962.88 | 1962.311 | 8863.6  | 1 | 1643.2 | 66.7 | 1  | K.SSMYYVLQFLKEDLPK.V                                                        |
| *              | HsFlag-FLJ20643_Ti   | 3.3819 | 0.3722 | 1198.46 | 1197.334 | 5363.8  | 3 | 988.8  | 75   | 3  | R.AVIHIDEQSGK.E                                                             |
| *              | HsFLAG-p53-DNA-D     | 2.8697 | 0.1729 | 1454.45 | 1454.623 | 8364.1  | 1 | 1047.4 | 66.7 | 1  | R.AVIHIDEQSGKEK.Y                                                           |
| *              | HsFlag-ZnF-HIT2_Ti   | 2.8302 | 0.1909 | 914.14  | 914.111  | 4313.4  | 4 | 884    | 87.5 | 2  | R.AVMATHGVK.G                                                               |
| *              | HsFlag-NUFIP_Ti_1C   | 4.3142 | 0.3915 | 1453.72 | 1451.782 | 4776.5  | 1 | 1029   | 81.8 | 3  | R.HVMLLSDLMTYK.G                                                            |
| *              | HsFlag-NUFIP_Ti_1C   | 4.5779 | 0.3313 | 1584.43 | 1584.728 | 6560.4  | 1 | 1326.1 | 73.1 | 4  | K.TADHLFDAAYFGQK.D                                                          |
| *              | HsFlag-NUFIP_Ti_11   | 2.732  | 0.3105 | 1912.4  | 1913.227 | 4495    | 1 | 324.2  | 46.7 | 5  | K.RPLIFDTNEFHPLVT.-                                                         |
| gi 4506613 re  |                      | 5      | 15     | 39.10%  | 128      | 14787   |   |        |      |    | 9.2 ribosomal protein L22 proprotein [Homo sapiens]                         |
| *              | HsFlag-NUFIP_Ti_1C   | 3.5129 | 0.4514 | 3087.24 | 3085.338 | 4765.5  | 1 | 596.4  | 42   | 1  | K.FTLDCTHPVEDGIMDAANFEQFLQER.I                                              |
| *              | HsFLAG-p53-DNA-D     | 5.7698 | 0.2804 | 3088.3  | 3085.338 | 11794.6 | 1 | 1858   | 34   | 9  | K.FTLDCTHPVEDGIMDAANFEQFLQER.I                                              |
|                | HsFLAG-ARP6_Ti_1     | 3.7536 | 0.3109 | 1244.26 | 1243.406 | 6167.6  | 1 | 808.9  | 66.7 | 1  | K.AGNLGGGVVTIER.S                                                           |
|                | HsFLAG-TCF3_Ti_1C    | 2.1208 | 0.1909 | 1207.61 | 1208.397 | 5920.7  | 3 | 393.3  | 60   | 2  | K.ITVTSEVPFSK.R                                                             |
|                | HsFlag-les6_293_Ti_1 | 3.6215 | 0.2194 | 1209.3  | 1208.397 | 6864.4  | 1 | 1146.2 | 80   | 2  | K.ITVTSEVPFSK.R                                                             |
| gi 4503545 re  |                      | 5      | 12     | 39.00%  | 154      | 16832   |   |        |      |    | 5.2 eukaryotic translation initiation factor 5A [Homo sapiens]              |
|                | HsFLAG-Lin9_Ti_20    | 3.5707 | 0.2797 | 1299.24 | 1299.556 | 6072.8  | 1 | 1606.1 | 86.4 | 5  | K.VHLVGIDIFTGK.K                                                            |
|                | HsFlag-VPS71_Ti_1C   | 3.46   | 0.3571 | 1299.64 | 1299.556 | 6797.5  | 1 | 1199.6 | 72.7 | 1  | K.VHLVGIDIFTGK.K                                                            |
| *              | HsFLAG-p53-DNA-D     | 4.482  | 0.3036 | 2737.31 | 2738.029 | 7155.6  | 1 | 1345.5 | 37   | 2  | K.RNDFQLIGIQDGYLSLLQDSGEVR.E                                                |
| *              | HsFLAG-p53-DNA-D     | 3.9154 | 0.3424 | 2582.24 | 2581.842 | 9403.7  | 1 | 873.2  | 43.2 | 2  | R.NDFQLIGIQDGYLSLLQDSGEVR.E                                                 |
|                | HsFlag-VPS71_Ti_1C   | 5.5635 | 0.4932 | 2628.12 | 2627.973 | 7298    | 1 | 1473.5 | 52.2 | 2  | K.YDCGEEILITVLSAMTEEAVAIK.A                                                 |
| gi 6005926 re  |                      | 10     | 52     | 38.90%  | 475      | 53501   |   |        |      |    | 9.1 U2 (RNU2) small nuclear RNA auxiliary factor 2 isoform a [Homo sapiens] |
| gi 60279268 re |                      | 10     | 52     | 39.30%  | 471      | 53121   |   |        |      |    | 9.1 U2 (RNU2) small nuclear RNA auxiliary factor 2 isoform b [Homo sapiens] |
|                | HsFLAG-p53-DNA-D     | 3.0673 | 0.1894 | 1167.3  | 1167.31  | 5762.5  | 3 | 1054   | 80   | 2  | R.GAKEEHGGLIR.S                                                             |
|                | HsFlag-NUFIP_Ti_1C   | 3.8369 | 0.3819 | 2205.52 | 2206.523 | 5411.4  | 1 | 468.6  | 50   | 1  | K.YWDVPPPGEHITPMQYK.A                                                       |
|                | HsFlag-NUFIP_Ti_1C   | 3.7039 | 0.3265 | 3789.88 | 3791.474 | 6077.3  | 2 | 538.6  | 22.3 | 2  | K.AMQAAGQIPATALLPTMPDGLAVTPTVPVVGSMTR.Q                                     |
|                | HsFLAG-ARP6_Ti_1     | 5.2242 | 0.4829 | 2134.2  | 2134.44  | 4509.4  | 1 | 774.2  | 55   | 17 | R.LGGLTQAPGNPVLAVQINQDK.N                                                   |
|                | HsFlag-NUFIP_Ti_2C   | 5.3266 | 0.2861 | 2134.88 | 2134.44  | 7986.9  | 1 | 1280.9 | 38.8 | 4  | R.LGGLTQAPGNPVLAVQINQDK.N                                                   |
|                | HsFLAG-p53-DNA-D     | 3.3439 | 0.1469 | 1043.48 | 1044.198 | 5254.6  | 2 | 1039.1 | 92.9 | 1  | K.NFAFLEFR.S                                                                |
|                | HsFLAG-p53-DNA-D     | 4.9578 | 0.404  | 2387.39 | 2387.667 | 8045.4  | 1 | 1753.2 | 57.1 | 3  | R.SVDETTQAMAFDGIIFQGQSLK.I                                                  |
|                | HsFLAG-p53-DNA-D     | 4.7449 | 0.4298 | 3560.8  | 3561.994 | 5208.6  | 1 | 894.6  | 32   | 2  | R.RPHDYQPLPGMSENPSVYVPGVVSTVVPDSAHK.L                                       |
|                | HsFlag-NUFIP_Ti_1C   | 4.6521 | 0.2964 | 1808.45 | 1807.056 | 4182.6  | 1 | 1173.4 | 80   | 10 | K.LFIGGLPNYLNDQVK.E                                                         |
|                | HsFlag-DPCD_Ti_20    | 3.9865 | 0.3184 | 1910.86 | 1910.144 | 5428.4  | 1 | 802.7  | 58.8 | 10 | K.SIEIPRPVDGVEVPGCGK.I                                                      |
| gi 7019485 re  |                      | 6      | 24     | 38.70%  | 191      | 21868   |   |        |      |    | 5.4 programmed cell death 6 [Homo sapiens]                                  |
|                | HsFLAG-p53-DNA-D     | 5.1708 | 0.2676 | 3190.38 | 3190.497 | 7642.8  | 2 | 675.6  | 26.8 | 6  | K.DRSGVISDELQQAALSNGTWTTPFNPVTVR.S                                          |
|                | HsFLAG-Lin9_Ti_20    | 3.5559 | 0.3357 | 2917.73 | 2919.221 | 6965.2  | 1 | 564.5  | 36.5 | 2  | R.SGVISDELQQAALSNGTWTTPFNPVTVR.S                                            |
| *              | HsFLAG-ARP6_Ti_1     | 3.4757 | 0.1871 | 1340.86 | 1340.537 | 7773.7  | 1 | 1074.4 | 75   | 3  | R.SIISMFDRENK.A                                                             |

|               |                   |        |        |         |          |         |                                                                |        |      |                                       |
|---------------|-------------------|--------|--------|---------|----------|---------|----------------------------------------------------------------|--------|------|---------------------------------------|
| *             | HsFLAG-ARP6_Ti_1  | 3.9828 | 0.2618 | 1442.17 | 1442.614 | 5685.5  | 1                                                              | 1485.7 | 83.3 | 6 K.AGVNFSEFTGVWK.Y                   |
| *             | HsARP6-FLAG_Ti_1  | 3.3131 | 0.2916 | 1342.45 | 1342.497 | 4717.3  | 1                                                              | 964.3  | 88.9 | 3 K.YITDQWQVFR.T                      |
| *             | HsFLAG-ARP6_Ti_1  | 3.7771 | 0.3185 | 1358.35 | 1357.552 | 7108.2  | 3                                                              | 1118.1 | 80   | 4 R.LSDQFHDILIR.K                     |
| gi 4507873 re | 8                 | 14     | 38.60% | 197     | 22626    | 7.1     | von Hippel-Lindau binding protein 1 [Homo sapiens]             |        |      |                                       |
| *             | HsFLAG-p53-DNA-D  | 5.3766 | 0.4121 | 2302.76 | 2303.681 | 9215.6  | 1                                                              | 2235.2 | 65.8 | 2 R.RHLGIPEAVFVEDVDSFMK.Q             |
| *             | HsFLAG-p53-DNA-D  | 4.7539 | 0.3527 | 2145.8  | 2147.494 | 3546.7  | 1                                                              | 692.3  | 63.9 | 1 R.LHLGIPEAVFVEDVDSFMK.Q             |
| *             | HsFLAG-p53-DNA-D  | 5.0464 | 0.3223 | 2149.1  | 2147.494 | 8197.5  | 1                                                              | 1901   | 43.1 | 3 R.LHLGIPEAVFVEDVDSFMK.Q             |
| *             | HsFLAG-p53-DNA-D  | 3.5791 | 0.2402 | 3401.38 | 3401.856 | 3581.1  | 2                                                              | 313.2  | 24.2 | 1 R.LHLGIPEAVFVEDVDSFMKQPGNETADTVLK.K |
| *             | HsFLAG-p53-DNA-D  | 2.6087 | 0.108  | 1093.54 | 1094.314 | 7700.4  | 2                                                              | 640.4  | 68.8 | 1 K.FMELNLAQK.K                       |
| *             | HsFLAG-p53-DNA-D  | 2.5943 | 0.1169 | 1256.29 | 1257.438 | 8977.8  | 9                                                              | 724.9  | 66.7 | 1 R.FLLADNLYCK.A                      |
| *             | HsFLAG-p53-DNA-D  | 3.827  | 0.1555 | 1257.36 | 1257.438 | 5357.9  | 9                                                              | 1171.6 | 88.9 | 1 R.FLLADNLYCK.A                      |
| *             | HsFLAG-p53-DNA-D  | 4.818  | 0.3288 | 2973.27 | 2974.226 | 11285.1 | 1                                                              | 1772   | 32.3 | 4 K.NLDSLEEDLFLRDQFTTTEVNMAR.V        |
| gi 34147630 r | 13                | 49     | 38.50% | 455     | 49875    | 7.6     | Tu translation elongation factor, mitochondrial [Homo sapiens] |        |      |                                       |
| *             | HsFLAG-p53-DNA-D  | 3.0477 | 0.4186 | 1810.74 | 1811.01  | 8695.6  | 1                                                              | 786.1  | 53.1 | 1 R.DKPHVNVGTIGHVDHGK.T               |
| *             | HsFLAG-ARP6_Ti_1  | 3.9632 | 0.3165 | 1493.35 | 1493.57  | 8911.1  | 1                                                              | 1768.8 | 81.8 | 2 K.KYEEIDNAPEER.A                    |
| *             | HsFLAG-ARP6_Ti_1  | 4.4988 | 0.4928 | 1673.88 | 1674.854 | 6357.2  | 1                                                              | 827.3  | 56.7 | 10 R.GITINAAHVEYSTAAR.H               |
| *             | HsFLAG-TIP49b_Ti_ | 4.4181 | 0.4307 | 1771.17 | 1771.852 | 10540.7 | 1                                                              | 1487.5 | 67.9 | 6 R.HYAHTDCPGHADVVK.N                 |
| *             | HsFLAG-TIP49b_Ti_ | 2.4134 | 0.0937 | 851.48  | 852.024  | 3765    | 2                                                              | 483.3  | 83.3 | 2 R.EHLLAR.Q                          |
| *             | HsFLAG-ARP6_Ti_1  | 5.0134 | 0.3741 | 3690.17 | 3693.152 | 5094.1  | 1                                                              | 547    | 25.8 | 6 R.ELLTEFGYKGEETPVIVGSALEGRDPELGLK.S |
| *             | HsFLAG-ARP6_Ti_1  | 4.3123 | 0.316  | 1543.48 | 1543.803 | 5760    | 1                                                              | 1644.8 | 80.8 | 5 K.LLDAVDTYIPVPAR.D                  |
| *             | HsFLAG-TIP49b_Ti_ | 2.0895 | 0.1156 | 1543.59 | 1543.803 | 4329.2  | 2                                                              | 401.4  | 50   | 1 K.LLDAVDTYIPVPAR.D                  |
| *             | HsFLAG-p53-DNA-D  | 4.0538 | 0.1671 | 2131.46 | 2130.492 | 6142.3  | 1                                                              | 814.3  | 55.6 | 2 R.DLEKPFLLPVEAVYSVPGR.G             |
| *             | HsFLAG-ARP6_Ti_1  | 4.9964 | 0.329  | 1644.6  | 1644.954 | 3705.2  | 1                                                              | 1097.1 | 82.1 | 6 K.PFLLPVEAVYSVPGR.G                 |
| *             | HsFLAG-TIP49b_Ti_ | 4.1076 | 0.2675 | 1373.03 | 1373.472 | 8827.2  | 1                                                              | 1682.7 | 81.8 | 2 K.KGDECELLGHSK.N                    |
| *             | HsFLAG-ARP6_Ti_1  | 3.2631 | 0.304  | 1263.11 | 1262.51  | 6097.9  | 1                                                              | 1221.1 | 85   | 1 R.TVVTGIEMFHK.S                     |
| *             | HsFLAG-ARP6_Ti_1  | 4.5041 | 0.4242 | 1909.34 | 1909.159 | 6056.8  | 1                                                              | 866.4  | 58.8 | 5 R.TIGTGLVTNTLAMTEEEK.N              |
| gi 15431301 r | 10                | 35     | 38.30% | 248     | 29226    | 10.7    | ribosomal protein L7 [Homo sapiens]                            |        |      |                                       |
|               | HsFLAG-TCF3_Ti_1( | 2.39   | 0.1633 | 1082.56 | 1083.27  | 3478.7  | 5                                                              | 345    | 66.7 | 2 K.EVPAVPETLK.K                      |
|               | HsFLAG-p53-DNA-D  | 3.574  | 0.1246 | 1321.49 | 1321.519 | 5782.4  | 1                                                              | 974.7  | 72.7 | 2 R.KAGNFYVPAEPK.L                    |
|               | HsFLAG-p53-DNA-D  | 3.6901 | 0.2783 | 1663.5  | 1663.957 | 8822.3  | 1                                                              | 1301.4 | 65.4 | 4 R.IVEPYIAWGYPNLK.S                  |
|               | HsFLAG-ARP6_Ti_1  | 4.5214 | 0.2638 | 1327.63 | 1327.57  | 4994.4  | 1                                                              | 1086.9 | 81.8 | 6 K.RIALTDNALIAR.S                    |
|               | HsFLAG-ARP6_Ti_1  | 3.7275 | 0.2982 | 1171.17 | 1171.382 | 8397.7  | 2                                                              | 1661.9 | 90   | 6 R.IALTDNALIAR.S                     |
|               | HsFLAG-ARP6_Ti_1  | 4.5206 | 0.4447 | 2153.68 | 2155.48  | 8550.3  | 1                                                              | 1632.5 | 64.7 | 7 K.YGIICMEDLIHEIYTVGK.R              |
|               | HsFLAG-TCF3_Ti_1( | 3.8286 | 0.1607 | 2156.23 | 2155.48  | 4540.7  | 1                                                              | 656.8  | 39.7 | 1 K.YGIICMEDLIHEIYTVGK.R              |
|               | HsFLAG-TCF3_Ti_1( | 2.5879 | 0.2406 | 1265.29 | 1266.442 | 5966.8  | 2                                                              | 386.8  | 66.7 | 1 K.EANNFLWPFK.L                      |
|               | HsFLAG-ARP6_Ti_1  | 3.3089 | 0.2606 | 1266.21 | 1266.442 | 5403.6  | 1                                                              | 1000.7 | 83.3 | 5 K.EANNFLWPFK.L                      |
|               | HsFLAG-ARP6_Ti_1  | 4.0549 | 0.2269 | 2117.6  | 2117.199 | 6719.3  | 1                                                              | 720.7  | 52.8 | 1 K.TTHFVEGGDAGNREDQINR.L             |
| gi 33469139 r | 53                | 330    | 38.20% | 1556    | 176752   | 9.5     | yeast INO80-like protein [Homo sapiens]                        |        |      |                                       |
| gi 38708321 r | 53                | 330    | 38.20% | 1556    | 176752   | 9.5     | yeast INO80-like protein [Homo sapiens]                        |        |      |                                       |
|               | HsFLAG-ARP5_Ti_1  | 4.1374 | 0.3929 | 2241.83 | 2242.457 | 10725.6 | 1                                                              | 1711.5 | 41.7 | 2 R.DDGGCTELAKPLYLQYLER.A             |
|               | HsFLAG-FLJ20309_  | 3.6675 | 0.1655 | 1195.39 | 1195.404 | 5468.1  | 1                                                              | 1176.8 | 93.8 | 7 K.PLYLQYLER.A                       |
|               | HsFLAG-FLJ20309_  | 3.8956 | 0.2874 | 3070.18 | 3070.248 | 4746    | 2                                                              | 261.9  | 30.4 | 1 R.NISSDSEDGLDDSNPLLPQSGDPLIQVK.E    |
|               | HsFLAG-FLJ20309_  | 5.4514 | 0.4724 | 2991.3  | 2992.227 | 7269    | 1                                                              | 1207.9 | 35.9 | 3 K.ELQQYQYYSAGLLSTYDPFYEQQR.H        |

|                   |        |        |         |          |         |   |        |      |                                 |
|-------------------|--------|--------|---------|----------|---------|---|--------|------|---------------------------------|
| HsFLAG-FLJ20309_  | 5.5298 | 0.3751 | 2991.97 | 2992.227 | 7459.3  | 1 | 1317.9 | 50   | 15 K.ELQQYQYYSAGLLSTYDPFYEQQR.H |
| HsFLAG-FLJ20309_  | 2.8132 | 0.2324 | 1153.46 | 1154.268 | 5469.6  | 1 | 704    | 70   | 9 K.FSHDAPPPGTK.K               |
| HsFLAG-FLJ20309_  | 3.3296 | 0.295  | 1153.68 | 1154.268 | 5233.4  | 1 | 1274.7 | 90   | 8 K.FSHDAPPPGTK.K               |
| HsFLAG-TIP49a_Ti_ | 2.5577 | 0.2261 | 1180.44 | 1181.337 | 4016.5  | 2 | 313.6  | 66.7 | 6 K.HLSIEQLNAR.R                |
| HsFLAG-ARP5_Ti_1  | 3.1394 | 0.0847 | 1182.67 | 1181.337 | 4281.8  | 1 | 950.3  | 88.9 | 6 K.HLSIEQLNAR.R                |
| HsFLAG-TCF3_Ti_1  | 2.2211 | 0.0954 | 964.53  | 965.097  | 3062.4  | 3 | 214.9  | 71.4 | 1 R.NLFLTNSR.K                  |
| HsFLAG-ARP5_Ti_1  | 2.2768 | 0.1182 | 1015.54 | 1016.213 | 5912.5  | 5 | 390.4  | 64.3 | 1 R.KLAHQCMK.E                  |
| HsFLAG-ARP5_Ti_1  | 3.5031 | 0.3288 | 1346.12 | 1346.529 | 9005.1  | 1 | 1329.5 | 83.3 | 2 K.KYEKVEKEHR.K                |
| HsFLAG-ARP8_Ti_2  | 4.7697 | 0.3562 | 2085.37 | 2085.428 | 6834.5  | 1 | 1199   | 62.5 | 2 K.LNFLITQTELYAHFMSR.K         |
| HsFLAG-ARP5_Ti_1  | 3.5926 | 0.1859 | 1797.35 | 1798.027 | 5524.4  | 2 | 797.8  | 64.3 | 1 R.KRDMGHDGIQEEILR.K           |
| HsFLAG-ARP5_Ti_1  | 3.5394 | 0.3093 | 1514.46 | 1513.665 | 8357.9  | 1 | 943.6  | 66.7 | 4 R.DMGHDGIQEEILR.K             |
| HsFLAG-TIP49b_Ti_ | 3.0129 | 0.3418 | 1423.92 | 1424.519 | 3699.1  | 1 | 228.5  | 54.5 | 4 K.NAENAYHIHQAR.T              |
| HsFLAG-ARP5_Ti_1  | 4.2605 | 0.4156 | 1424.02 | 1424.519 | 7393    | 1 | 1167.4 | 72.7 | 17 K.NAENAYHIHQAR.T             |
| HsFLAG-TCF3_Ti_1  | 4.5792 | 0.4765 | 1743.63 | 1743.871 | 10208.4 | 1 | 1633.8 | 62.5 | 13 K.SGTGFGEYSYLANPSIR.A        |
| HsFlag-FLJ90652_2 | 3.3884 | 0.2409 | 1487.42 | 1487.652 | 3924.8  | 6 | 415.4  | 57.7 | 1 R.AGEDIPQPTIFNGK.L            |
| HsFlag-FLJ90652_2 | 4.805  | 0.3546 | 1521.64 | 1522.788 | 7712.3  | 1 | 1649.9 | 80.8 | 13 K.TVQSIALLAHLAER.E           |
| HsFLAG-ARP8_Ti_2  | 2.7908 | 0.2526 | 1522.25 | 1522.788 | 5977.2  | 2 | 497.2  | 57.7 | 1 K.TVQSIALLAHLAER.E            |
| HsFLAG-TIP49a_Ti_ | 3.818  | 0.4227 | 2971.5  | 2972.332 | 4440.5  | 1 | 384.3  | 37.5 | 1 R.ENIWGPFLIISPASTLNNWHQEFTR.F |
| HsFlag-FLJ90652_2 | 2.9903 | 0.3165 | 1353.7  | 1354.511 | 3712.5  | 1 | 547.6  | 80   | 2 K.VLPYWGNPHDR.K               |
| HsFLAG-ARP5_Ti_1  | 2.7789 | 0.1733 | 1482.68 | 1482.685 | 5044.9  | 6 | 365.2  | 59.1 | 1 K.VLPYWGNPHDRK.V              |
| HsFlag-FLJ90652_2 | 4.272  | 0.3908 | 1597.2  | 1595.854 | 6822.6  | 1 | 1566.6 | 83.3 | 1 K.WQYMWLDEAQALK.S             |
| HsFlag-FLJ90652_2 | 2.6233 | 0.2666 | 1048.19 | 1049.079 | 4779.8  | 1 | 334.5  | 68.8 | 1 K.DVENELSDK.I                 |
| HsFLAG-ARP5_Ti_1  | 4.0605 | 0.3029 | 2557.58 | 2557.842 | 9893.2  | 1 | 1371.9 | 35   | 1 K.DVENELSDKIEILMYCQLTSR.Q     |
| HsFLAG-ARP5_Ti_1  | 2.8723 | 0.2476 | 1429.16 | 1429.585 | 5445.3  | 1 | 855.2  | 80   | 1 R.KVCNHPELFER.Q               |
| HsFlag-FLJ90652_2 | 3.0491 | 0.2711 | 1300.74 | 1301.411 | 4864    | 1 | 924.7  | 88.9 | 6 K.VCNHPELFER.Q                |
| HsFlag-FLJ90652_2 | 2.7725 | 0.1669 | 1473.85 | 1473.671 | 3511.6  | 9 | 222.9  | 54.5 | 1 R.QETWSPFHISLK.P              |
| HsFLAG-TCF3_Ti_1  | 2.9816 | 0.224  | 1406.71 | 1406.624 | 5644.2  | 1 | 858.3  | 77.3 | 3 R.VLSPFAPDYIQR.S              |
| HsFLAG-FLJ20309_  | 4.1612 | 0.3286 | 1461.61 | 1459.565 | 6695.5  | 1 | 1475.9 | 81.8 | 5 K.GINEESCFSFLR.F              |
| HsFlag-FLJ90652_2 | 6.5722 | 0.4901 | 2203.27 | 2204.651 | 7279.3  | 1 | 2253.8 | 71.1 | 4 R.FIDISPAEMANMLQGLLAR.W       |
| HsFLAG-FLJ20309_  | 2.8818 | 0.128  | 1341.58 | 1341.382 | 5869.7  | 2 | 711.9  | 72.7 | 3 R.SWGAPEGESHQR.Y              |
| HsFLAG-ARP5_Ti_1  | 6.4722 | 0.325  | 2796.2  | 2795.226 | 6256.5  | 1 | 1188.1 | 37   | 5 R.NKDFLLGVNFPLSFPNLCSCPLLK.S  |
| HsFlag-FLJ90652_2 | 5.2761 | 0.4612 | 2552.76 | 2552.948 | 6731.6  | 1 | 829.7  | 47.6 | 30 K.DFLLGVNFPLSFPNLCSCPLLK.S   |
| HsFLAG-ARP8_Ti_2  | 2.4928 | 0.1035 | 1065.13 | 1065.18  | 6729.9  | 1 | 738.6  | 75   | 5 K.SLVFSSHCK.A                 |
| HsFLAG-FLJ20309_  | 4.4438 | 0.4572 | 1446.54 | 1446.563 | 6552    | 1 | 1321.5 | 75   | 16 K.AVSGYSDQVVHQR.R            |
| HsFLAG-ARP8_Ti_2  | 4.2602 | 0.3536 | 1862.8  | 1864.124 | 4412.5  | 1 | 831.8  | 70   | 11 R.CLLTELPFLCVASPR.V          |
| HsFLAG-TIP49a_Ti_ | 3.6018 | 0.3314 | 1511.02 | 1510.61  | 2550.3  | 2 | 395.4  | 70.8 | 1 R.VTAVPLDSYCNR.S              |
| HsFLAG-TCF3_Ti_1  | 4.155  | 0.2933 | 1942.56 | 1942.148 | 4704.3  | 1 | 1023   | 75   | 7 K.QCLLNGAPELAADWLN.R          |
| HsFLAG-ARP8_Ti_1  | 2.0786 | 0.3196 | 949.23  | 950.034  | 3634    | 1 | 257.3  | 68.8 | 1 K.ESLITDSGK.L                 |
| HsFLAG-FLJ20309_  | 4.4353 | 0.2437 | 1177.52 | 1177.429 | 5036.5  | 1 | 1547.8 | 94.4 | 12 K.LYALDVLLTR.L               |
| HsFLAG-ARP5_Ti_1  | 3.9939 | 0.3397 | 1325.38 | 1325.55  | 8453    | 1 | 1787.8 | 80   | 10 R.NDIFVLLSTR.A               |
| HsFLAG-FLJ20309_  | 4.5598 | 0.3718 | 1732.44 | 1733.079 | 7321.4  | 1 | 1439   | 73.3 | 17 R.MVISGGNFKPDTLKPK.E         |
| HsFLAG-FLJ20309_  | 5.0039 | 0.3179 | 1632.51 | 1631.817 | 6769.4  | 1 | 1813   | 84.6 | 13 K.EVVSLLLDDEELEK.K           |
| HsFLAG-TCF3_Ti_1  | 3.166  | 0.3319 | 1221.5  | 1222.402 | 6821.1  | 1 | 591.4  | 53.8 | 4 R.KSTAGSAAAMAGAK.A            |

|                |                     |        |        |         |          |                                                            |   |        |      |     |                                          |
|----------------|---------------------|--------|--------|---------|----------|------------------------------------------------------------|---|--------|------|-----|------------------------------------------|
|                | HsFLAG-TCF3_Ti_10   | 2.9596 | 0.3463 | 1222.38 | 1222.402 | 6547.9                                                     | 1 | 809.4  | 65.4 | 3   | R.KSTAGSAAAMAGAK.A                       |
|                | HsFlag-FLJ90652_29  | 2.2022 | 0.1637 | 1093.45 | 1094.228 | 5845.4                                                     | 4 | 353    | 54.2 | 1   | K.STAGSAAAMAGAK.A                        |
|                | HsFlag-les6_293_Ti_ | 3.3522 | 0.2722 | 1095.28 | 1094.228 | 6694.5                                                     | 1 | 1096.1 | 70.8 | 5   | K.STAGSAAAMAGAK.A                        |
|                | HsFLAG-ARP8_Ti_2    | 5.2807 | 0.5347 | 1850.41 | 1849.01  | 9469.7                                                     | 1 | 1833.6 | 57.9 | 8   | K.AGAAAAAAYAYGYNVSK.G                    |
|                | HsFLAG-FLJ20309_    | 6.8488 | 0.571  | 3473.03 | 3471.889 | 6925                                                       | 1 | 1410.3 | 30   | 22  | K.GISASSPLQTSLVRPAGLADFGPSSASSPLSSPLSK.G |
|                | HsFLAG-ARP5_Ti_1    | 4.4911 | 0.4716 | 1641.62 | 1641.883 | 7947.3                                                     | 1 | 1337.4 | 67.9 | 12  | K.NLHMTSSLAPDSLVR.K                      |
| gij 13376810 r | 25                  | 95     | 38.20% | 836     | 93463    | 8.6 enhancer of polycomb 1 [Homo sapiens]                  |   |        |      |     |                                          |
| *              | HsFLAG-TIP49b_Ti_   | 3.8671 | 0.2835 | 1314.54 | 1314.571 | 3692.2                                                     | 1 | 540.4  | 72.7 | 6   | R.ALDASKPLPVFR.C                         |
| *              | HsTIP60_Ti_102.149  | 2.2503 | 0.1449 | 1193.4  | 1194.33  | 8774.2                                                     | 4 | 620.4  | 55   | 1   | R.AISAQQVYGEK.R                          |
| *              | HsTIP60_Ti_104.143  | 2.8205 | 0.2468 | 1350.13 | 1350.517 | 7720.8                                                     | 3 | 679.4  | 63.6 | 1   | R.AISAQQVYGEK.R                          |
| *              | HsMRGBP-FLAG_Ti_    | 4.3425 | 0.2336 | 3134.16 | 3133.499 | 8004                                                       | 1 | 864.1  | 26.9 | 1   | K.RDNMVIPVPEAESNIAYYESIYPGEFK.M          |
| *              | HsFLAG-TIP49b_Ti_   | 5.0459 | 0.494  | 3134.42 | 3133.499 | 9279.2                                                     | 1 | 1297.7 | 44.2 | 1   | K.RDNMVIPVPEAESNIAYYESIYPGEFK.M          |
| *              | HsYL1_Ti_102.3148.  | 3.4618 | 0.3167 | 2977.42 | 2977.312 | 6941.7                                                     | 1 | 821.5  | 42   | 4   | R.DNMVIPVPEAESNIAYYESIYPGEFK.M           |
| *              | HsFLAG-TIP49b_Ti_   | 3.5519 | 0.1152 | 2296.17 | 2296.668 | 9642.2                                                     | 2 | 956    | 35.3 | 1   | K.KMDICPLQFEEMDRLEK.G                    |
| *              | HsTIP60_Ti_101.145  | 3.9549 | 0.3046 | 1329.23 | 1329.453 | 4334.8                                                     | 1 | 797.3  | 75   | 4   | K.GSGQQPVSLQEAK.L                        |
| *              | HsTIP60_Ti_106.236  | 3.2611 | 0.224  | 1357.32 | 1357.59  | 5116.9                                                     | 1 | 1036.1 | 85   | 4   | K.LLLKEDDELIR.E                          |
| *              | HsTIP60_Ti_102.181  | 4.1815 | 0.4093 | 1430.05 | 1429.486 | 6572.6                                                     | 1 | 982.9  | 70.8 | 4   | R.DGSSTNDPYVAFR.R                        |
| *              | HsMRGBP-FLAG_Ti_    | 2.0736 | 0.118  | 1018.08 | 1018.3   | 6222.3                                                     | 4 | 460    | 68.8 | 1   | R.AVTILEMIK.R                            |
| *              | HsFLAG-TIP49b_Ti_   | 3.3117 | 0.2834 | 2247.44 | 2247.505 | 5942.5                                                     | 1 | 418.7  | 41.7 | 1   | K.RYNLGDYNGEIMSEVMAQR.Q                  |
| *              | HsFLAG-TIP49b_Ti_   | 3.8727 | 0.3383 | 2373.81 | 2375.832 | 4773.3                                                     | 1 | 540.3  | 47.5 | 7   | R.QPMKPTYAIIPIITNSSQFK.H                 |
| *              | HsH2AZ-FLAG_293_    | 5.3531 | 0.5265 | 2366.34 | 2367.707 | 5040.9                                                     | 1 | 918.3  | 54.3 | 8   | K.VLPSSAAATPQQTSPAALPVFNAK.D             |
| *              | HsMRGBP-FLAG_Ti_    | 4.2108 | 0.3756 | 2368.99 | 2367.707 | 7185.3                                                     | 1 | 1293.3 | 37   | 2   | K.VLPSSAAATPQQTSPAALPVFNAK.D             |
| *              | HsFLAG-TIP49b_Ti_   | 4.8531 | 0.3856 | 2578.23 | 2578.769 | 6971.9                                                     | 1 | 1088.1 | 52.4 | 5   | K.AGCQYAPHLDQGTGNWPWTSPK.D               |
| *              | HsFLAG-TIP49b_Ti_   | 3.3727 | 0.2012 | 1142.63 | 1143.369 | 9005.7                                                     | 8 | 919.2  | 72.2 | 1   | K.DLSQILVNIK.S                           |
| *              | HsTIP60_Ti_104.291  | 3.7366 | 0.2252 | 1142.68 | 1143.369 | 7815                                                       | 3 | 1525.8 | 83.3 | 10  | K.DLSQILVNIK.S                           |
| *              | HsMRGBP-FLAG_Ti_    | 4.219  | 0.4133 | 1746.55 | 1746.751 | 6420.2                                                     | 1 | 1419.6 | 71.4 | 4   | R.TPSLHSDNDELSCR.K                       |
| *              | HsMRGBP-FLAG_Ti_    | 4.7054 | 0.4721 | 1874.75 | 1874.925 | 8536.2                                                     | 1 | 1443.2 | 66.7 | 4   | R.TPSLHSDNDELSCR.L                       |
| *              | HsFLAG-TIP49b_Ti_   | 5.9091 | 0.3649 | 3052.48 | 3053.335 | 10600.8                                                    | 1 | 2682.9 | 37.5 | 2   | K.SSSGSAHFAFTAQYQQHQQLALMQK.Q            |
| *              | HsMRGBP-FLAG_Ti_    | 5.8506 | 0.4806 | 2474.56 | 2474.788 | 7994.8                                                     | 1 | 1636.8 | 56.5 | 13  | K.TLDSASAQFAASALVTSEQLMGFK.M             |
| *              | HsMRGBP-FLAG_Ti_    | 4.2404 | 0.3802 | 1911.69 | 1911.209 | 9070.9                                                     | 1 | 1233.1 | 58.3 | 4   | R.LTVPSSVATVNSIAPINAR.H                  |
| *              | HsH2AZ-FLAG_293_    | 3.3865 | 0.2041 | 1133.96 | 1133.256 | 7720.9                                                     | 1 | 1261.7 | 80   | 4   | K.LAAAANCQVSK.V                          |
| *              | HsTIP60_Ti_102.142  | 3.1052 | 0.2337 | 1217.33 | 1217.321 | 6282.6                                                     | 1 | 1695   | 86.4 | 2   | K.VPSSSVDSVPR.E                          |
| gij 13904870 r | 7                   | 184    | 37.70% | 204     | 22876    | 9.7 ribosomal protein S5 [Homo sapiens]                    |   |        |      |     |                                          |
| *              | HsFlag-NUFIP_Ti_10  | 5.0929 | 0.4385 | 2322.76 | 2324.549 | 8044.2                                                     | 1 | 1326.2 | 55.3 | 139 | K.WSTDDVQINDISLQDYIAVK.E                 |
| *              | HsFlag-NUFIP_Ti_10  | 2.4105 | 0.1623 | 900.59  | 901.013  | 5426.2                                                     | 2 | 331.6  | 71.4 | 2   | K.YLPHSAGR.Y                             |
| *              | HsFlag-NUFIP_Ti_10  | 3.5391 | 0.3258 | 1178.14 | 1178.428 | 8616.1                                                     | 1 | 1327.5 | 88.9 | 5   | R.LTNSMMMHGR.N                           |
| *              | HsFLAG-ARP8_Ti_2    | 2.6712 | 0.1626 | 1139.62 | 1141.316 | 6693.6                                                     | 2 | 687.8  | 77.8 | 1   | R.RQAVDVSPLR.R                           |
| *              | HsFlag-NUFIP_Ti_11  | 5.0773 | 0.419  | 1658.81 | 1658.91  | 7087                                                       | 1 | 1472.5 | 76.9 | 9   | R.RVNQAIWLLCTGAR.E                       |
| *              | HsFlag-NUFIP_Ti_10  | 5.2076 | 0.3615 | 1502.42 | 1502.723 | 7463.1                                                     | 1 | 1803.7 | 83.3 | 12  | R.VNQAIWLLCTGAR.E                        |
| *              | HsFlag-NUFIP_Ti_10  | 5.1702 | 0.3795 | 1632.52 | 1632.818 | 9139.2                                                     | 1 | 2297.1 | 75   | 16  | K.TIAECLADELINA.AK.G                     |
| gij 54112117 r | 31                  | 126    | 37.30% | 1304    | 145830   | 7.1 splicing factor 3b, subunit 1 isoform 1 [Homo sapiens] |   |        |      |     |                                          |
| *              | HsARP6-FLAG_Ti_1    | 2.7648 | 0.1878 | 1226.97 | 1226.375 | 6592.2                                                     | 1 | 1180.1 | 75   | 1   | K.VVNGAAASQPPSK.R                        |
| *              | HsARP6-FLAG_Ti_1    | 3.0865 | 0.2831 | 1517.83 | 1516.607 | 8607.8                                                     | 1 | 784    | 57.7 | 1   | R.WDQTADQTPGATPK.K                       |



|             |                    |        |        |         |          |                                                                |   |        |      |                                     |
|-------------|--------------------|--------|--------|---------|----------|----------------------------------------------------------------|---|--------|------|-------------------------------------|
| *           | HsFlag-VPS71_Ti_10 | 4.9735 | 0.4614 | 2010.13 | 2011.202 | 8427                                                           | 1 | 1672.6 | 64.7 | 1 K.KLSSWDQAETPGHTPSLR.W            |
| *           | HsFlag-NUFIP_Ti_20 | 2.7184 | 0.2416 | 1883.42 | 1883.027 | 8796.8                                                         | 1 | 599.5  | 46.9 | 2 K.LSSWDQAETPGHTPSLR.W             |
| *           | HsFlag-NUFIP_Ti_10 | 4.4317 | 0.4299 | 1831.93 | 1833.013 | 7250.7                                                         | 1 | 2058.1 | 73.5 | 7 K.IWDPTPSHTPAGAATPGR.G            |
| *           | HsFLAG-p53-DNA-D   | 2.5287 | 0.2575 | 1733.7  | 1734.782 | 4962.6                                                         | 4 | 273.1  | 50   | 2 R.GDTPGHATPGHGGATSSAR.K           |
| *           | HsFLAG-p53-DNA-D   | 3.3365 | 0.4056 | 1467.89 | 1468.525 | 5543.2                                                         | 1 | 565.2  | 65.4 | 1 R.DTPGHGSGWAETPR.T                |
| *           | HsFlag-VPS71_Ti_10 | 3.7346 | 0.3424 | 1746.42 | 1746.828 | 7579.8                                                         | 1 | 1018.6 | 55.9 | 1 R.TDRGGDSIGETPTPGASK.R            |
| *           | HsFLAG-p53-DNA-D   | 5.4149 | 0.4531 | 2302.46 | 2303.552 | 9804.2                                                         | 1 | 1569.1 | 54.8 | 4 K.SRWDETPASQMGGSTPVLTPGK.T        |
| *           | HsFlag-DPCD_Ti_20  | 2.9145 | 0.2089 | 2061.8  | 2060.286 | 9366.5                                                         | 1 | 631.4  | 47.4 | 1 R.WDETPASQMGGSTPVLTPGK.T          |
| *           | HsFLAG-FLJ20729_   | 4.053  | 0.4015 | 2111.62 | 2112.319 | 10234.2                                                        | 1 | 981.3  | 50   | 3 R.NRPLSDEELDAMFPEGYK.V            |
| *           | HsFlag-VPS71_Ti_10 | 3.0296 | 0.2991 | 2262.33 | 2262.56  | 9379.8                                                         | 1 | 406.9  | 35   | 1 K.LTATPTPLGGMTGFHMQTEDR.T         |
| *           | HsFlag-VPS71_Ti_10 | 3.9897 | 0.2005 | 2639.01 | 2638.893 | 7430.3                                                         | 3 | 591.1  | 40.9 | 3 K.SVNDQPSGNLPLFKPDDIQYFDK.L       |
| *           | HsFlag-VPS71_Ti_10 | 5.2549 | 0.2786 | 1804.36 | 1802.973 | 5545.5                                                         | 1 | 1345.9 | 76.7 | 8 K.LLVDVDESTLSPEEQK.E              |
| *           | HsFlag-NUFIP_Ti_11 | 5.6081 | 0.3452 | 3043.63 | 3044.496 | 9426.9                                                         | 1 | 1343.5 | 30.8 | 3 K.AREFGAGPLFNQILPLLMSPTLEDQER.H   |
| *           | HsFLAG-p53-DNA-D   | 3.9249 | 0.3191 | 2816.19 | 2817.229 | 5292.7                                                         | 1 | 448.8  | 37.5 | 3 R.EFGAGPLFNQILPLLMSPTLEDQER.H     |
| *           | HsFLAG-p53-DNA-D   | 5.5995 | 0.2944 | 2035.97 | 2035.388 | 5545.2                                                         | 1 | 1600.2 | 78.1 | 19 K.ILVVIEPLLEDIDYYAR.V            |
| *           | HsFLAG-FLJ20309_   | 4.2509 | 0.2843 | 1915.04 | 1915.37  | 5127.2                                                         | 1 | 989.5  | 61.1 | 19 R.AFAVVASALGIPSLLPFLK.A          |
| *           | HsARP6-FLAG_Ti_11  | 4.9002 | 0.4203 | 1915.24 | 1915.37  | 5951.6                                                         | 1 | 1154.3 | 41.7 | 2 R.AFAVVASALGIPSLLPFLK.A           |
| *           | HsFLAG-Lin9_Ti_20  | 4.5486 | 0.3134 | 2047.54 | 2047.519 | 7556.5                                                         | 1 | 1923.7 | 70.6 | 1 K.IVQQIAILMGCAILPHLR.S            |
| *           | HsFlag-VPS71_Ti_10 | 5.8598 | 0.4476 | 1837.78 | 1838.068 | 8393.6                                                         | 1 | 2225.2 | 76.7 | 7 R.SLVEIEHGLVDEQQK.V               |
| *           | HsARP6-FLAG_Ti_11  | 3.7942 | 0.2935 | 3248.67 | 3248.787 | 7104.8                                                         | 1 | 721.8  | 24.2 | 1 R.TISALAIALAEATPYGIESFDSVLKPLWK.G |
| *           | HsFLAG-p53-DNA-D   | 4.547  | 0.3992 | 2237.43 | 2238.563 | 4847.2                                                         | 1 | 947.1  | 63.9 | 5 K.AIGYLIPLMDAEYANYYTR.E           |
| *           | HsFlag-VPS71_Ti_10 | 3.3181 | 0.2145 | 1603.65 | 1603.871 | 3721.7                                                         | 1 | 982.4  | 83.3 | 4 K.PYLPQICGTVLWR.L                 |
| *           | HsFLAG-FLJ20729_   | 4.5978 | 0.2435 | 3163.78 | 3164.727 | 5980.5                                                         | 1 | 685.6  | 29.5 | 1 K.LMGHLGVVLYEYLGEEYPEVLGSILGALK.A |
| *           | HsFLAG-ARP6_Ti_11  | 3.211  | 0.1882 | 1081.85 | 1082.349 | 7738.9                                                         | 1 | 1600.9 | 88.9 | 3 K.AIVNVIGMHK.M                    |
| *           | HsFlag-VPS71_Ti_10 | 3.6966 | 0.1027 | 1278.49 | 1278.541 | 3708.8                                                         | 2 | 913.4  | 88.9 | 1 R.ICFELLELLK.A                    |
| *           | HsFLAG-ARP6_Ti_11  | 3.1908 | 0.2769 | 1341.33 | 1341.553 | 5964.8                                                         | 1 | 890.2  | 68.2 | 2 R.RATVNTFGYIAK.A                  |
| *           | HsFlag-NUFIP_Ti_10 | 5.6894 | 0.3705 | 1689.56 | 1689.996 | 10203.7                                                        | 1 | 2428.4 | 73.3 | 17 K.AIGPHDVLATLLNNLK.V             |
| *           | HsFLAG-FLJ20729_   | 3.5281 | 0.4328 | 1997.66 | 1999.286 | 6050.2                                                         | 1 | 824.4  | 59.4 | 1 K.DYIYAVTPLLEDALMDR.D             |
| *           | HsFLAG-Lin9_Ti_20  | 3.2109 | 0.3288 | 2194.07 | 2195.483 | 10138.8                                                        | 1 | 553.2  | 41.7 | 1 K.IYNSIYIGSQDALIAHYPR.I           |
| gij HsSRCAP | 123                | 961    | 37.00% | 3170    | 337678   | 5.8 current presumptive full-length human SRCAP [Homo sapiens] |   |        |      |                                     |
|             | HsFlag-VPS71_Ti_10 | 2.561  | 0.2774 | 1085.37 | 1084.174 | 4658.7                                                         | 7 | 482.2  | 66.7 | 1 K.SHAIEIAEQAK.H                   |
|             | HsYL1_Ti_106.1976  | 5.6175 | 0.457  | 2050.85 | 2050.192 | 6598.1                                                         | 1 | 2092.3 | 76.5 | 11 K.SHAIEIAEQAKHEAEIETR.I          |
|             | HsFlag-VPS71_Ti_10 | 5.7387 | 0.4556 | 2672.06 | 2672.854 | 7846                                                           | 1 | 1836.7 | 60   | 9 K.GHWDYLCEEMQWLSADFAQER.R         |
|             | HsFlag-VPS71_Ti_10 | 4.1515 | 0.2924 | 2673.82 | 2672.854 | 6051.4                                                         | 1 | 660.2  | 31.2 | 3 K.GHWDYLCEEMQWLSADFAQER.R         |
|             | HsH2AZ-FLAG_293_   | 5.3539 | 0.4085 | 1701.79 | 1699.944 | 6503.9                                                         | 1 | 1889.6 | 78.6 | 10 K.ALDLHLDLDFIVGQTEK.Y            |
|             | HsH2AZ-FLAG_293_   | 5.6765 | 0.3709 | 1880.66 | 1882.078 | 7943.6                                                         | 1 | 1937.3 | 75   | 17 K.YSDLLSQSLNQLPTSSK.A            |
|             | HsH2AZ-FLAG_293_   | 4.7889 | 0.4789 | 2029.33 | 2029.137 | 4745                                                           | 1 | 784.7  | 54.8 | 11 K.AGSSPCLGSSSAASSPPPPASR.L       |
|             | HsH2AZ-FLAG_293_   | 6.0534 | 0.4174 | 4481.32 | 4483.361 | 4999.4                                                         | 1 | 996.9  | 29.1 | 5 E                                 |
|             | HsSrcap_Ti_202.340 | 3.2729 | 0.1679 | 1298.8  | 1298.479 | 3825.2                                                         | 5 | 543.9  | 75   | 14 R.EGELPLEELLR.S                  |
|             | HsFlag-VPS71_Ti_10 | 2.0372 | 0.134  | 1299.7  | 1298.479 | 2415.9                                                         | 8 | 154.5  | 60   | 2 R.EGELPLEELLR.S                   |
|             | HsYL1-FLAG_Ti_206  | 5.3459 | 0.4086 | 2900.62 | 2901.156 | 6375.6                                                         | 1 | 1132.3 | 34.6 | 6 R.DGPEEGAEIEEPPQVLEIKPPPSAVTQR.N  |
|             | HsYL1-FLAG_Ti_206  | 3.1465 | 0.0819 | 2901.68 | 2901.156 | 5341.9                                                         | 2 | 377.6  | 34.6 | 1 R.DGPEEGAEIEEPPQVLEIKPPPSAVTQR.N  |
|             | HsYL1-FLAG_Ti_202  | 5.7219 | 0.4571 | 2338.15 | 2339.431 | 7143.7                                                         | 1 | 1397.8 | 56.5 | 12 R.DEEQSEADAGSGPPTPGPTTLGPK.K     |

|                    |        |        |         |          |        |   |        |      |                                    |
|--------------------|--------|--------|---------|----------|--------|---|--------|------|------------------------------------|
| HsH2AZ-FLAG_293_   | 5.7209 | 0.3265 | 1685.38 | 1685.915 | 6526.6 | 1 | 2643   | 83.3 | 18 K.KEITDIAAAAESLQPK.G            |
| HsH2AZ-FLAG_293_   | 4.2573 | 0.117  | 1686.22 | 1685.915 | 7070.2 | 1 | 2371   | 51.7 | 2 K.KEITDIAAAAESLQPK.G             |
| HsH2AZ-FLAG_293_   | 5.1173 | 0.1921 | 1557.23 | 1557.741 | 5532.6 | 1 | 1620.6 | 78.6 | 17 K.EITDIAAAAESLQPK.G             |
| HsFLAG-TIP49a_Ti_  | 3.596  | 0.2963 | 1557.41 | 1557.741 | 3532   | 1 | 555.4  | 71.4 | 10 K.EITDIAAAAESLQPK.G             |
| HsH2AZ-FLAG_293_   | 2.1068 | 0.2388 | 1081.27 | 1082.242 | 7689.8 | 4 | 513.2  | 66.7 | 1 K.GYTLATTQVK.T                   |
| HsH2AZ-FLAG_293_   | 2.8829 | 0.2279 | 1082.23 | 1082.242 | 5166.6 | 1 | 836.1  | 83.3 | 4 K.GYTLATTQVK.T                   |
| HsFlag-VPS71_Ti_10 | 4.8006 | 0.4047 | 2025.9  | 2026.314 | 4265.1 | 1 | 1320.1 | 76.7 | 12 R.EYQHIGLDWLVTMYEK.K            |
| HsFlag-VPS71_Ti_10 | 4.1045 | 0.1388 | 2028.27 | 2026.314 | 5581.3 | 2 | 1048.3 | 48.3 | 2 R.EYQHIGLDWLVTMYEK.K             |
| HsFLAG-TIP49b_Ti_  | 3.8366 | 0.3906 | 1458.54 | 1459.744 | 6234.4 | 1 | 768.8  | 61.5 | 5 K.KLNGILADEMGLGK.T               |
| HsFLAG-TIP49b_Ti_  | 5.6703 | 0.3117 | 1459    | 1459.744 | 7242.6 | 1 | 2031   | 84.6 | 11 K.KLNGILADEMGLGK.T              |
| HsH2AZ-FLAG_293_   | 5.0063 | 0.439  | 1700.25 | 1698.967 | 5635.8 | 1 | 1299.3 | 71.4 | 34 K.TIQTISLLAHLACEK.G             |
| HsFlag-VPS71_Ti_10 | 2.8294 | 0.1959 | 981.26  | 981.108  | 5106   | 1 | 822.5  | 100  | 1 K.RWCPSFK.I                      |
| HsH2AZ-FLAG_293_   | 2.2104 | 0.1518 | 1056.32 | 1057.235 | 7899.5 | 8 | 558.1  | 62.5 | 2 K.ILTYGAQK.E                     |
| HsYL1_Ti_104.1423. | 2.8489 | 0.1776 | 1344.63 | 1342.538 | 5387.5 | 1 | 838.9  | 75   | 1 K.ILTYGAQKER.K                   |
| HsFLAG-TIP49b_Ti_  | 3.4783 | 0.3347 | 1437.39 | 1437.604 | 8184.3 | 1 | 992.6  | 68.2 | 1 K.PNAFHVCITSYK.L                 |
| HsFlag-VPS71_Ti_10 | 3.3616 | 0.3664 | 1226.56 | 1227.409 | 6017.2 | 1 | 1166.6 | 88.9 | 16 K.LVLQDQHAFR.R                  |
| HsFLAG-TIP49b_Ti_  | 1.9468 | 0.1013 | 1226.57 | 1227.409 | 4527.2 | 8 | 251.5  | 55.6 | 3 K.LVLQDQHAFR.R                   |
| HsYL1_Ti_102.1919. | 4.0643 | 0.1561 | 1319.69 | 1320.528 | 6869.6 | 2 | 1228.7 | 80   | 14 R.YLILDEAQNIK.N                 |
| HsH2AZ-FLAG_293_   | 3.9574 | 0.2078 | 1320.12 | 1320.528 | 5846.2 | 2 | 1699.9 | 90   | 15 R.YLILDEAQNIK.N                 |
| HsH2AZ-FLAG_293_   | 3.7127 | 0.2475 | 1393.04 | 1393.545 | 5397   | 1 | 1179.3 | 90   | 29 R.WQSLNFNFSQR.R                 |
| HsYL1_Ti_102.3188. | 5.4738 | 0.4734 | 2629    | 2629.901 | 6896.4 | 1 | 1136.8 | 50   | 49 K.EWFSNPLTGMIEGSQEYNEGLVK.R     |
| HsFlag-VPS71_Ti_10 | 4.7562 | 0.3791 | 2631.23 | 2629.901 | 8616.9 | 1 | 1350.4 | 35.2 | 2 K.EWFSNPLTGMIEGSQEYNEGLVK.R      |
| HsYL1_Ti_106.1854. | 2.0021 | 0.0822 | 944.62  | 945.109  | 4414.1 | 2 | 364.1  | 75   | 1 K.KYEHVIR.C                      |
| HsH2AZ-FLAG_293_   | 2.5665 | 0.2329 | 945.36  | 945.109  | 4375.8 | 2 | 736.5  | 91.7 | 1 K.KYEHVIR.C                      |
| HsFlag-VPS71_Ti_10 | 2.3506 | 0.3791 | 1593.51 | 1594.743 | 2410.2 | 1 | 105.7  | 50   | 1 R.CLYDDFMAQTTTK.E                |
| HsH2AZ-FLAG_293_   | 4.5654 | 0.4831 | 1594.67 | 1594.743 | 6195.3 | 1 | 1835.2 | 87.5 | 9 R.CLYDDFMAQTTTK.E                |
| HsH2AZ-FLAG_293_   | 5.4697 | 0.3981 | 2263.35 | 2264.636 | 3717.5 | 1 | 1149.8 | 67.5 | 24 R.PVTSPFITPGICFSTASLVL.R.A      |
| HsFlag-VPS71_Ti_10 | 5.0732 | 0.4421 | 2265.27 | 2264.636 | 6759.2 | 1 | 1316.4 | 40   | 8 R.PVTSPFITPGICFSTASLVL.R.A       |
| HsFLAG-TIP49b_Ti_  | 2.2874 | 0.2259 | 1036.37 | 1037.164 | 3744.4 | 3 | 321.3  | 62.5 | 3 R.ATDVHPLQR.I                    |
| HsFLAG-ARP6_Ti_1   | 3.3128 | 0.2472 | 1037.36 | 1037.164 | 3729.8 | 2 | 785.5  | 87.5 | 8 R.ATDVHPLQR.I                    |
| HsFLAG-TIP49b_Ti_  | 3.1482 | 0.1889 | 1592.1  | 1592.854 | 3576.1 | 1 | 492.9  | 69.2 | 1 R.IDMGRFDLIGLEGR.V               |
| HsH2AZ-FLAG_293_   | 3.1687 | 0.1672 | 1020.25 | 1020.173 | 4155.1 | 4 | 829.6  | 87.5 | 5 R.FDLIGLEGR.V                    |
| HsH2AZ-FLAG_293_   | 3.952  | 0.2758 | 1454.44 | 1454.626 | 4205.5 | 1 | 1057   | 77.3 | 13 R.VSRYEADTFLPR.H                |
| HsFlag-VPS71_Ti_10 | 3.5125 | 0.2261 | 1455.48 | 1454.626 | 8258.8 | 3 | 1220.5 | 47.7 | 1 R.VSRYEADTFLPR.H                 |
| HsFlag-VPS71_Ti_10 | 2.3929 | 0.1922 | 1111.61 | 1112.227 | 3642.2 | 3 | 391.9  | 75   | 1 R.YEADTFLPR.H                    |
| HsH2AZ-FLAG_293_   | 3.6929 | 0.332  | 1112.65 | 1112.227 | 4653.4 | 2 | 988.4  | 93.8 | 8 R.YEADTFLPR.H                    |
| HsH2AZ-FLAG_293_   | 2.8901 | 0.2487 | 1700.17 | 1701.019 | 2922.5 | 1 | 390.6  | 60   | 2 R.VLLEVATAPDPPRPK.P              |
| HsH2AZ-FLAG_293_   | 4.0388 | 0.3007 | 2025.1  | 2025.442 | 4936.4 | 3 | 683.5  | 40.3 | 3 R.VLLEVATAPDPPRPKPKV.K.M         |
| HsH2AZ-FLAG_293_   | 1.9708 | 0.084  | 812.36  | 813.046  | 3593.6 | 5 | 447.2  | 75   | 2 R.MLQVPVK.Q                      |
| HsFLAG-ARP6_Ti_2   | 1.8492 | 0.0952 | 997.5   | 998.17   | 4149.9 | 5 | 252.1  | 75   | 1 R.TVVVVNNPR.A                    |
| HsVPS71-FLAG_Ti_1  | 2.3572 | 0.1092 | 1350.81 | 1351.586 | 4172.4 | 7 | 290.8  | 50   | 2 R.LSPAPPPGSSSLK.P                |
| HsFLAG-TIP49a_Ti_  | 2.6062 | 0.1391 | 1144.46 | 1144.375 | 4537.3 | 1 | 383.9  | 72.2 | 2 R.LILSPDMQAR.L                   |
| HsFLAG-TIP49b_Ti_  | 5.0998 | 0.1539 | 2607.76 | 2607.97  | 7643.6 | 1 | 1167   | 48.1 | 10 R.LPSGEVVSIGQLASLAQRPVANAGGSK.P |

|                    |        |        |         |          |         |   |        |      |                                              |
|--------------------|--------|--------|---------|----------|---------|---|--------|------|----------------------------------------------|
| HsFlag-VPS71_Ti_10 | 6.0224 | 0.2725 | 2608.78 | 2607.97  | 5541.8  | 1 | 962.3  | 32.7 | 12 R.LPSGEVVSIGQLASLAQRPVANAGGSK.P           |
| HsH2AZ-FLAG_293_   | 6.2265 | 0.1553 | 3733.77 | 3735.278 | 6663.7  | 1 | 885.6  | 26.4 | 3 R.LPSGEVVSIGQLASLAQRPVANAGGSKPLTFQIQGNK.L  |
| HsFLAG-TIP49a_Ti_  | 3.0643 | 0.198  | 1145.48 | 1146.332 | 4823.4  | 2 | 434.2  | 66.7 | 3 K.PLTFQIQGNK.L                             |
| HsFLAG-TIP49a_Ti_  | 3.7088 | 0.2691 | 1146.52 | 1146.332 | 5022.6  | 1 | 748.1  | 77.8 | 7 K.PLTFQIQGNK.L                             |
| HsH2AZ-FLAG_293_   | 2.9223 | 0.1624 | 959.24  | 959.134  | 5458.3  | 2 | 962.5  | 87.5 | 2 K.LTLTGAQVR.Q                              |
| HsFlag-VPS71_Ti_10 | 3.8077 | 0.3133 | 1726.26 | 1727.09  | 2989.6  | 1 | 408    | 60   | 6 R.PLQMPPTMVNNTGVVK.I                       |
| HsSrcap_Ti_203.177 | 3.5013 | 0.3981 | 1583.67 | 1584.81  | 4943.5  | 1 | 712.2  | 69.2 | 6 R.LPVSKDEPDTLTLR.S                         |
| HsFLAG-TIP49b_Ti_  | 4.5561 | 0.3786 | 1583.97 | 1584.81  | 6906.6  | 1 | 1429.1 | 76.9 | 27 R.LPVSKDEPDTLTLR.S                        |
| HsH2AZ-FLAG_293_   | 4.0447 | 0.2823 | 1584.52 | 1584.81  | 4519.8  | 2 | 696.1  | 44.2 | 4 R.LPVSKDEPDTLTLR.S                         |
| HsYL1-FLAG_Ti_206  | 2.8279 | 0.179  | 945.47  | 945.112  | 5010.2  | 2 | 818.5  | 92.9 | 2 R.RQPPPPPR.S                               |
| HsFLAG-TIP49b_Ti_  | 3.5172 | 0.2124 | 1327.34 | 1328.461 | 8925.6  | 2 | 919.8  | 65   | 14 R.SPFYLDSLEEK.R                           |
| HsFlag-VPS71_Ti_10 | 3.547  | 0.3155 | 1328.44 | 1328.461 | 5598.5  | 1 | 1185.5 | 80   | 17 R.SPFYLDSLEEK.R                           |
| HsH2AZ-FLAG_293_   | 3.526  | 0.337  | 1483.76 | 1484.649 | 7348.7  | 1 | 1063   | 77.3 | 1 R.SPFYLDSLEEK.R.K                          |
| HsH2AZ-FLAG_293_   | 5.7689 | 0.476  | 3853.46 | 3853.376 | 6112.4  | 1 | 876    | 28.6 | 19 R.IFQLSEAHGALAPVYGTEVLD FCTLPQPVASPIGPR.S |
| HsH2AZ-FLAG_293_   | 4.4647 | 0.3893 | 2042.97 | 2043.205 | 8338.6  | 1 | 1330.3 | 41.2 | 6 R.SPGPSHPTFWTYTEAAHR.A                     |
| HsFLAG-TIP49b_Ti_  | 3.8212 | 0.4231 | 2045.72 | 2043.205 | 5309.2  | 1 | 579.5  | 55.9 | 7 R.SPGPSHPTFWTYTEAAHR.A                     |
| HsSrcap_Ti_202.233 | 3.471  | 0.1128 | 1215.6  | 1216.377 | 3835.9  | 7 | 438.9  | 77.8 | 4 R.LDQLSEIER.F                              |
| HsH2AZ-FLAG_293_   | 4.2018 | 0.0982 | 1216.38 | 1216.377 | 6405.9  | 1 | 1452.2 | 94.4 | 7 R.LDQLSEIER.F                              |
| HsFlag-VPS71_Ti_10 | 5.1857 | 0.3581 | 1775.72 | 1774.974 | 7308    | 1 | 1894.1 | 78.6 | 18 R.QAAFQEQLASELWPR.A                       |
| HsH2AZ-FLAG_293_   | 4.8083 | 0.3004 | 1775.85 | 1774.974 | 6528.3  | 1 | 1875.7 | 53.6 | 3 R.QAAFQEQLASELWPR.A                        |
| HsFlag-VPS71_Ti_10 | 2.1839 | 0.2382 | 996.49  | 997.102  | 5154.6  | 2 | 489.7  | 71.4 | 2 R.LIQYDCGK.L                               |
| HsH2AZ-FLAG_293_   | 3.4198 | 0.1753 | 1027.39 | 1027.296 | 4544.8  | 1 | 950.3  | 93.8 | 15 K.LQTLAVLLR.Q                             |
| HsScrap_Ti_103.234 | 3.2054 | 0.2633 | 1110.68 | 1109.372 | 5683.1  | 1 | 1098.9 | 93.8 | 2 R.VLIFTQMTR.M                              |
| HsFlag-VPS71_Ti_10 | 3.0901 | 0.2743 | 1313.89 | 1313.552 | 6675.3  | 1 | 809.1  | 77.8 | 1 K.RIFCFILSTR.S                             |
| HsFLAG-TIP49a_Ti_  | 2.0409 | 0.1108 | 1156.38 | 1157.364 | 5054.3  | 2 | 413.5  | 75   | 1 R.IFCFILSTR.S                              |
| HsH2AZ-FLAG_293_   | 3.7138 | 0.2508 | 1157.28 | 1157.364 | 5783.3  | 1 | 1422   | 93.8 | 21 R.IFCFILSTR.S                             |
| HsFlag-VPS71_Ti_10 | 5.1023 | 0.3423 | 2124.86 | 2123.449 | 7600.3  | 1 | 1812.9 | 69.4 | 5 K.RMLGDMAIEGGNFTTAYFK.Q                    |
| HsFLAG-TIP49a_Ti_  | 6.1078 | 0.4235 | 1967.62 | 1967.262 | 4835.2  | 1 | 1452.5 | 73.5 | 6 R.MLGDMAIEGGNFTTAYFK.Q                     |
| HsVPS71-FLAG_Ti_   | 3.4614 | 0.3293 | 3152.76 | 3152.361 | 3562.3  | 1 | 270.4  | 33.9 | 4 R.ELFDMPLEEPSSSSVPSAPEEEEEETVASK.Q         |
| HsFLAG-TIP49b_Ti_  | 2.4198 | 0.1126 | 1368.4  | 1369.53  | 2235.8  | 1 | 169.6  | 75   | 1 K.QTHILEQALCR.A                            |
| HsFLAG-TIP49b_Ti_  | 2.6946 | 0.1643 | 1369.07 | 1369.53  | 6513.4  | 7 | 579.8  | 70   | 1 K.QTHILEQALCR.A                            |
| HsYL1-FLAG_Ti_206  | 5.7286 | 0.4972 | 3838.63 | 3839.95  | 6508.2  | 1 | 806.8  | 25   | 9 K.AEQVAELAEFNENDGFPAGEGEEAGRPGAEDDEMSR.A   |
| HsH2AZ-FLAG_293_   | 4.7395 | 0.2131 | 1910.8  | 1911.163 | 6510.5  | 1 | 1675.5 | 51.6 | 5 R.AEQEIAALVEQLTPIER.Y                      |
| HsFlag-VPS71_Ti_10 | 4.5835 | 0.1698 | 1911.93 | 1911.163 | 4578.5  | 1 | 929.8  | 65.6 | 4 R.AEQEIAALVEQLTPIER.Y                      |
| HsYL1-FLAG_Ti_203  | 2.6096 | 0.1046 | 1281.78 | 1280.42  | 8171.8  | 1 | 1199.5 | 80   | 1 K.FLEASLEEVSR.E                            |
| HsH2AZ-FLAG_293_   | 5.427  | 0.252  | 1779.6  | 1779.985 | 6844.6  | 1 | 2591.5 | 89.3 | 27 K.FLEASLEEVSR.EELK.Q                      |
| HsH2AZ-FLAG_293_   | 2.7294 | 0.1422 | 1131.04 | 1131.188 | 4185.5  | 1 | 674.4  | 94.4 | 2 K.QAEEQVEAAR.K                             |
| HsH2AZ-FLAG_293_   | 7.3506 | 0.4836 | 3847.36 | 3846.937 | 10449.1 | 1 | 2448.5 | 31.4 | 13 K.DLDQAKEEVFRLPQEEEEGPGAGDESSCGTGGGTHR.R  |
| HsFLAG-TIP49a_Ti_  | 6.7335 | 0.438  | 3176.49 | 3176.216 | 9335.2  | 1 | 1463.9 | 31   | 3 K.EEVFRLPQEEEEGPGAGDESSCGTGGGTHR.R         |
| HsH2AZ-FLAG_293_   | 5.2233 | 0.3802 | 1918.69 | 1919.064 | 7170.1  | 1 | 2438.2 | 54.4 | 16 R.AETQGANHTPVISAHQTR.S                    |
| HsSrcap_Ti_205.149 | 4.8344 | 0.4506 | 1918.89 | 1919.064 | 5635.8  | 1 | 1008.6 | 58.8 | 23 R.AETQGANHTPVISAHQTR.S                    |
| HsH2AZ-FLAG_293_   | 4.0393 | 0.2913 | 1623.37 | 1622.943 | 6141.7  | 1 | 1336   | 75   | 12 K.DLLPVAVEILPVSEK.N                       |
| HsFLAG-TIP49b_Ti_  | 4.0524 | 0.2877 | 3991.69 | 3991.315 | 4599.2  | 1 | 460.6  | 23.1 | 5 .R                                         |

|               |                    |        |        |         |          |        |                                                         |        |      |                                       |
|---------------|--------------------|--------|--------|---------|----------|--------|---------------------------------------------------------|--------|------|---------------------------------------|
|               | HsFlag-VPS71_Ti_10 | 2.5566 | 0.1701 | 891.36  | 890.969  | 5077.5 | 6                                                       | 895.3  | 92.9 | 1 R.TSADVEIR.G                        |
|               | HsYL1-FLAG_Ti_200  | 3.254  | 0.2884 | 1337    | 1334.478 | 4870   | 1                                                       | 640.4  | 65.4 | 8 R.GQGTGRPGQPPGPK.V                  |
|               | HsFLAG-ARP6_Ti_2   | 1.945  | 0.1342 | 916.48  | 917.09   | 7651.4 | 6                                                       | 752    | 78.6 | 2 R.LVTVVEEK.E                        |
|               | HsH2AZ-FLAG_293_   | 2.8844 | 0.2121 | 917.15  | 917.09   | 2513.2 | 2                                                       | 518.1  | 92.9 | 2 R.LVTVVEEK.E                        |
|               | HsScrap_Ti_102.188 | 4.6303 | 0.4417 | 2114.84 | 2115.305 | 4055.8 | 1                                                       | 919.8  | 56.8 | 19 R.GAASTLVPGVSETSASPGSPSVR.S        |
|               | HsYL1-FLAG_Ti_200  | 4.5521 | 0.3236 | 3438.46 | 3436.784 | 6520.9 | 1                                                       | 712.8  | 25.8 | 1 R.SMSGPESSPIGGPCEAAPSSSLPTPPQPFAR.R |
|               | HsSrcap_Ti_203.262 | 6.1277 | 0.4553 | 2671.35 | 2672.01  | 7951.5 | 1                                                       | 2648.8 | 61.1 | 15 R.HIELGVTGGGSPENGDGALLAITPPAVK.R   |
|               | HsFlag-VPS71_Ti_10 | 2.1684 | 0.34   | 1103.48 | 1104.202 | 5483.4 | 5                                                       | 399.1  | 55   | 3 R.GVDEAPSTLK.G                      |
|               | HsH2AZ-FLAG_293_   | 2.7176 | 0.1568 | 1104.28 | 1104.202 | 3657.3 | 6                                                       | 594.2  | 75   | 1 R.GVDEAPSTLK.G                      |
|               | HsYL1_Ti_103.1574. | 5.3792 | 0.4394 | 2102.25 | 2101.238 | 3960.6 | 1                                                       | 695.3  | 60   | 18 K.ARDLPPIGTISSAGDGNSES.R.T         |
|               | HsH2AZ-FLAG_293_   | 5.0941 | 0.2758 | 2102.66 | 2101.238 | 7415.3 | 1                                                       | 1749.1 | 42.5 | 4 K.ARDLPPIGTISSAGDGNSES.R.T          |
|               | HsYL1_Ti_102.1759. | 4.9499 | 0.3528 | 1875.05 | 1873.971 | 5555.9 | 1                                                       | 721.2  | 61.1 | 8 R.DLPIPGTISSAGDGNSES.R.T            |
|               | HsFlag-VPS71_Ti_10 | 3.6027 | 0.1689 | 2386.67 | 2387.618 | 7316.9 | 1                                                       | 601.4  | 40.5 | 3 R.PSQLPVLDRDSTSVLESCGLGR.R          |
|               | HsH2AZ-FLAG_293_   | 4.6056 | 0.265  | 2388.1  | 2387.618 | 4094.5 | 1                                                       | 828.7  | 41.7 | 7 R.PSQLPVLDRDSTSVLESCGLGR.R          |
|               | HsYL1_Ti_101.1960. | 4.1061 | 0.3249 | 1383.11 | 1381.449 | 5604.8 | 1                                                       | 919.9  | 70.8 | 3 R.DSTSVLESCGLGR.R                   |
|               | HsYL1_Ti_104.1455. | 3.0463 | 0.2427 | 1075.66 | 1075.271 | 6111.2 | 1                                                       | 1220.6 | 87.5 | 4 R.LRLEAEGMR.G                       |
|               | HsFlag-VPS71_Ti_10 | 3.7486 | 0.3223 | 1538.26 | 1536.812 | 5326.6 | 1                                                       | 901.5  | 73.1 | 23 R.LRPGSLVPPLETEK.L                 |
|               | HsFlag-VPS71_Ti_10 | 2.9791 | 0.291  | 1237.66 | 1238.432 | 2852.4 | 3                                                       | 287.4  | 65.4 | 2 K.RAGAPVGGSPGLAK.R                  |
|               | HsH2AZ-FLAG_293_   | 3.806  | 0.3005 | 1238.52 | 1238.432 | 6272   | 1                                                       | 940.5  | 69.2 | 6 K.RAGAPVGGSPGLAK.R                  |
|               | HsH2AZ-FLAG_293_   | 2.4172 | 0.3561 | 1081.32 | 1082.245 | 5007.1 | 1                                                       | 513.8  | 58.3 | 4 R.AGAPVGGSPGLAK.R                   |
|               | HsFlag-VPS71_Ti_10 | 3.003  | 0.3169 | 1082.48 | 1082.245 | 3782.4 | 2                                                       | 575.2  | 70.8 | 2 R.AGAPVGGSPGLAK.R                   |
|               | HsFlag-VPS71_Ti_10 | 3.5469 | 0.288  | 1190.4  | 1189.271 | 6551.4 | 1                                                       | 1496.8 | 90   | 4 R.LVGTNNQGDQR.I                     |
|               | HsH2AZ-FLAG_293_   | 3.4518 | 0.3871 | 1433.56 | 1434.595 | 2997.6 | 1                                                       | 431.3  | 67.9 | 16 R.SSAPPSLAGPAVSHR.G                |
|               | HsSrcap_Ti_205.163 | 2.1125 | 0.2718 | 1433.61 | 1434.595 | 5988   | 1                                                       | 353.7  | 46.4 | 1 R.SSAPPSLAGPAVSHR.G                 |
| gi 4506679 re | 7                  | 75     | 37.00% | 165     | 18898    | 10.2   | ribosomal protein S10 [Homo sapiens]                    |        |      |                                       |
|               | HsFLAG-ARP8_Ti_2   | 3.6829 | 0.0914 | 1109.69 | 1110.382 | 4283.8 | 1                                                       | 909.8  | 87.5 | 5 R.IAIYELLFK.E                       |
| *             | HsFlag-NUFIP_Ti_10 | 2.1028 | 0.2022 | 809.52  | 809.897  | 2610.2 | 9                                                       | 302.1  | 83.3 | 3 K.HPELADK.N                         |
| *             | HsFlag-NUFIP_Ti_11 | 5.6023 | 0.4669 | 2003.85 | 2004.255 | 7665.1 | 1                                                       | 2992.9 | 89.3 | 22 R.HFYWYLTNEGQYLR.D                 |
| *             | HsFlag-NUFIP_Ti_11 | 5.2927 | 0.3262 | 2004.24 | 2004.255 | 9248.6 | 1                                                       | 2533.4 | 57.1 | 13 R.HFYWYLTNEGQYLR.D                 |
| *             | HsFlag-NUFIP_Ti_10 | 2.7159 | 0.0873 | 1734.8  | 1735.036 | 3007   | 7                                                       | 374.9  | 57.1 | 3 R.DYLHLPPEIVPATLR.R                 |
|               | HsFlag-NUFIP_Ti_10 | 3.7736 | 0.2264 | 1570.77 | 1570.702 | 5692.1 | 1                                                       | 1108.6 | 51.8 | 2 K.KAEAGAGSATEFQFR.G                 |
|               | HsFlag-NUFIP_Ti_10 | 4.4652 | 0.3688 | 1573.09 | 1570.702 | 7596.9 | 1                                                       | 1655.3 | 75   | 27 K.KAEAGAGSATEFQFR.G                |
| gi 5031653 re | 6                  | 24     | 36.90% | 225     | 26131    | 5.6    | breast carcinoma amplified sequence 2 [Homo sapiens]    |        |      |                                       |
| *             | HsFLAG-p53-DNA-D   | 3.9038 | 0.4373 | 2370.88 | 2371.623 | 4169.9 | 1                                                       | 406.2  | 50   | 3 K.NYLSYLTAPDYSAFETDIMR.N            |
| *             | HsFlag-NUFIP_Ti_20 | 4.1134 | 0.3311 | 1333.35 | 1333.487 | 6508.3 | 1                                                       | 1478.3 | 86.4 | 8 K.RYELPAPSSGQK.N                    |
| *             | HsFlag-NUFIP_Ti_20 | 4.0189 | 0.416  | 1825.7  | 1826.08  | 8868.6 | 1                                                       | 1035.9 | 57.1 | 2 K.VYNENLVHMIEHAQK.E                 |
| *             | HsFlag-NUFIP_Ti_20 | 2.6567 | 0.1116 | 1210.41 | 1210.338 | 5114.2 | 1                                                       | 623.6  | 81.2 | 1 K.HIQDLNWQR.K                       |
| *             | HsFlag-NUFIP_Ti_20 | 4.819  | 0.3912 | 1678.57 | 1678.944 | 7132.4 | 1                                                       | 1444.5 | 73.1 | 3 K.LREMESNWWVSLVSK.N                 |
| *             | HsFlag-NUFIP_Ti_20 | 4.3089 | 0.1691 | 1590.88 | 1591.845 | 7863.2 | 1                                                       | 1775.7 | 79.2 | 7 R.TIVQLENEYQIK.Q                    |
| gi 41406064 r | 52                 | 139    | 36.80% | 1976    | 228997   | 5.5    | myosin, heavy polypeptide 10, non-muscle [Homo sapiens] |        |      |                                       |
| *             | HsFLAG-Lin9_Ti_20  | 3.9426 | 0.3192 | 1650.86 | 1649.844 | 5190.6 | 1                                                       | 927.2  | 71.4 | 1 R.AVIYNPATQADWTAK.K                 |
| *             | HsFLAG-BC014022_   | 3.0212 | 0.1678 | 1128.14 | 1128.36  | 6564.5 | 1                                                       | 1101.3 | 87.5 | 3 K.KLVWIPSER.H                       |
| *             | HsFLAG-Lin9_Ti_20  | 2.5175 | 0.2233 | 1373.96 | 1374.496 | 7814.3 | 5                                                       | 569.5  | 63.6 | 1 R.HGFEAASIKEER.G                    |

|   |                   |        |        |         |          |         |   |        |      |                                    |
|---|-------------------|--------|--------|---------|----------|---------|---|--------|------|------------------------------------|
| * | HsFLAG-ARP6_Ti_1  | 4.3483 | 0.3981 | 2286.24 | 2287.556 | 7047.8  | 1 | 714    | 47.4 | 1 K.VEDMAELTCLNEASVLHNLK.D         |
| * | HsFLAG-ARP6_Ti_1  | 3.0244 | 0.4114 | 1755.14 | 1756.026 | 4579.7  | 1 | 593.8  | 65.4 | 2 K.NLPIYSENIEMYR.G                |
| * | HsFLAG-Lin9_Ti_20 | 3.8076 | 0.3868 | 2125.48 | 2126.205 | 8110.7  | 1 | 708    | 44.7 | 1 R.EDQSILCTGEGSAGKTENTK.K         |
| * | HsFLAG-BC014022_  | 4.3103 | 0.4181 | 1454.17 | 1453.684 | 7405.9  | 1 | 1123   | 70.8 | 8 K.VIQYLAHVASSHK.G                |
| * | HsFLAG-Lin9_Ti_20 | 4.3101 | 0.3539 | 1743.57 | 1744.001 | 6147.2  | 1 | 1311.4 | 73.3 | 3 R.QLLQANPILESFGNAK.T             |
| * | HsFLAG-ARP6_Ti_1  | 4.8327 | 0.3425 | 2373.85 | 2373.708 | 5896    | 1 | 1097.7 | 55   | 5 R.INFDVTGYIVGANIETYLLEK.S        |
| * | HsFLAG-ARP6_Ti_1  | 2.7996 | 0.2079 | 1961.61 | 1962.258 | 8629.4  | 1 | 615.9  | 46.9 | 1 R.TFHIFYQLLSGAGEHLK.S            |
| * | HsFLAG-ARP6_Ti_1  | 4.1063 | 0.3475 | 1441.39 | 1441.583 | 7057.9  | 1 | 1384.8 | 77.3 | 3 K.SDLLLEGFNMYR.F                 |
| * | HsFLAG-Lin9_Ti_20 | 3.2736 | 0.2531 | 1677.56 | 1677.897 | 4004.9  | 1 | 579.2  | 64.3 | 3 R.FLSNGYIPIPGQQDK.D              |
| * | HsFLAG-ARP6_Ti_1  | 4.3862 | 0.478  | 1524.96 | 1525.788 | 6448.5  | 1 | 1695.5 | 80.8 | 3 K.VVSSVLQFGNISFK.K               |
| * | HsFLAG-Lin9_Ti_20 | 3.3398 | 0.2523 | 1653.58 | 1653.962 | 7007.1  | 1 | 814.5  | 60.7 | 1 K.VVSSVLQFGNISFKK.E              |
| * | HsFLAG-ARP6_Ti_1  | 4.0471 | 0.3311 | 1722.79 | 1722.039 | 6276.4  | 1 | 1270.4 | 73.1 | 1 K.LCHLLGMNVMFTR.A                |
| * | HsFLAG-ARP6_Ti_1  | 3.9279 | 0.1225 | 2468.62 | 2468.789 | 8469.2  | 1 | 1635.8 | 41.7 | 1 K.LQQLFNHTMFILEQEEYQR.E          |
| * | HsFLAG-ARP6_Ti_1  | 3.8076 | 0.3428 | 1296.43 | 1295.447 | 6649.5  | 1 | 1344   | 85   | 2 K.ADFCIIHYAGK.V                  |
| * | HsFLAG-ARP6_Ti_1  | 4.044  | 0.4691 | 2140.09 | 2141.32  | 5292.3  | 1 | 430.2  | 47.2 | 1 K.NMDPLNDNVATLLHQSSDR.F          |
| * | HsFLAG-ARP6_Ti_1  | 6.4213 | 0.5642 | 2088.72 | 2089.368 | 5680    | 1 | 1957.3 | 73.7 | 4 R.IVGLDQVTGMTTETAFGSAYK.T        |
| * | HsFLAG-BC014022_  | 4.6953 | 0.3416 | 1578.18 | 1575.852 | 3947.8  | 1 | 735    | 69.2 | 4 R.AGKLDPHLVLDQLR.C               |
| * | HsFLAG-Lin9_Ti_20 | 2.6215 | 0.2311 | 1319.1  | 1319.547 | 3341.6  | 1 | 429.6  | 75   | 2 K.LDPHLVLDQLR.C                  |
| * | HsFLAG-ARP6_Ti_1  | 2.9294 | 0.2075 | 1543.17 | 1543.806 | 4525.3  | 2 | 644.1  | 70.8 | 1 R.QRYEILTPNAIPK.G                |
| * | HsFLAG-ARP6_Ti_1  | 4.1988 | 0.3798 | 1224.38 | 1224.359 | 6572.6  | 1 | 1434.4 | 85   | 2 R.AGVLAHLEER.D                   |
| * | HsFLAG-ARP6_Ti_1  | 3.3407 | 0.3363 | 1595.79 | 1596.876 | 9028.9  | 1 | 1151.4 | 66.7 | 1 K.ITDIIFFQAVCR.G                 |
| * | HsFLAG-ARP6_Ti_1  | 3.9547 | 0.2514 | 2439.2  | 2436.696 | 10565.7 | 1 | 1050   | 45   | 1 K.NILAEQLQAETELFAEAEEMR.A        |
| * | HsFLAG-Lin9_Ti_20 | 3.2123 | 0.2489 | 2244.21 | 2242.379 | 7930.6  | 1 | 516    | 47.2 | 1 K.MQAHIQDLEEQLEDEEGAR.Q          |
| * | HsFLAG-ARP6_Ti_1  | 3.835  | 0.1914 | 2871.37 | 2872.159 | 11321   | 3 | 1030.9 | 29.2 | 2 K.RKLDGETTDLQDQIAELQAQIDELK.L    |
| * | HsFLAG-ARP6_Ti_1  | 5.1937 | 0.2602 | 2587.79 | 2587.797 | 7555.5  | 1 | 1263.5 | 52.3 | 2 K.LDGETTDLQDQIAELQAQIDELK.L      |
| * | HsFLAG-Lin9_Ti_20 | 3.785  | 0.2098 | 1244.1  | 1244.39  | 7408    | 4 | 1366.4 | 85   | 1 K.KEEELQGALAR.G                  |
| * | HsFLAG-Lin9_Ti_20 | 4.7329 | 0.3101 | 2006.92 | 2008.146 | 9418    | 1 | 2180.7 | 68.8 | 4 R.ELQAQIAELQEDFESEK.A            |
| * | HsFLAG-ARP6_Ti_1  | 4.0222 | 0.3099 | 3219.3  | 3219.484 | 10670.3 | 1 | 985    | 27.8 | 1 K.RDLSEELEALKTELEDTLDTTAAQQELR.T |
| * | HsFLAG-p53-DNA-D  | 5.3287 | 0.3432 | 3062.66 | 3063.296 | 10086   | 1 | 1338.7 | 29.8 | 4 R.DLSEELEALKTELEDTLDTTAAQQELR.T  |
| * | HsFLAG-Lin9_Ti_20 | 5.9491 | 0.4741 | 1797.88 | 1797.96  | 8541.5  | 1 | 2892.6 | 83.3 | 5 R.HATALEELSEQLEQAK.R             |
| * | HsFLAG-BC014022_  | 3.6913 | 0.2754 | 1379.82 | 1380.587 | 8478.3  | 2 | 1337.4 | 72.7 | 2 K.KLDAQVQELHAK.V                 |
| * | HsFLAG-Lin9_Ti_20 | 5.0078 | 0.4456 | 1945.67 | 1946.119 | 6027    | 1 | 1194.6 | 68.8 | 10 K.LQNELDNVSTLLEEAEK.K           |
| * | HsFLAG-ARP6_Ti_1  | 6.0352 | 0.3984 | 2404.22 | 2405.535 | 7870.1  | 1 | 2183.5 | 65   | 5 K.DAASLESQQLQDTQELLQEETR.Q       |
| * | HsFLAG-Lin9_Ti_20 | 3.3261 | 0.2845 | 1761.29 | 1762.908 | 7517.2  | 1 | 1221.9 | 70   | 1 K.KVDDDLGTIESLEEAK.K             |
| * | HsFLAG-Lin9_Ti_20 | 3.3395 | 0.318  | 1938.13 | 1939.089 | 9211.8  | 1 | 864.2  | 56.7 | 2 R.LQQELDDLTVLDLHQR.Q             |
| * | HsFLAG-Lin9_Ti_20 | 3.416  | 0.1163 | 1220.85 | 1221.396 | 6427.8  | 2 | 1186.2 | 83.3 | 2 K.KFDQLLAEEK.S                   |
| * | HsFLAG-Lin9_Ti_20 | 4.1596 | 0.3535 | 1663.95 | 1664.81  | 6757.6  | 1 | 1069.2 | 69.2 | 1 R.ALEEALAEAKEEFER.Q              |
| * | HsFLAG-ARP6_Ti_1  | 6.8581 | 0.5173 | 1962.21 | 1963.059 | 10191.7 | 1 | 3429.4 | 81.2 | 12 R.TQLEEELEDELQATEDAK.L          |
| * | HsFLAG-Lin9_Ti_20 | 3.2932 | 0.2766 | 1360.99 | 1361.448 | 7778.8  | 4 | 886.1  | 75   | 2 R.ELEAELEDERK.Q                  |
| * | HsFLAG-Lin9_Ti_20 | 6.16   | 0.4314 | 2046.29 | 2046.239 | 9509.9  | 1 | 3084.7 | 51.5 | 2 K.SLEAEILQLQEELASSER.A           |
| * | HsFLAG-ARP6_Ti_1  | 6.0676 | 0.4075 | 2046.49 | 2046.239 | 9273.3  | 1 | 2679.6 | 73.5 | 10 K.SLEAEILQLQEELASSER.A          |
| * | HsFLAG-Lin9_Ti_20 | 3.2909 | 0.1892 | 2201.03 | 2201.268 | 7709.1  | 1 | 567.9  | 42.1 | 1 R.HAEQERDELADEITNSASGK.S         |
| * | HsFLAG-ARP6_Ti_1  | 4.3947 | 0.3592 | 1450.23 | 1450.499 | 9411.6  | 1 | 2736.4 | 84.6 | 1 R.DELADEITNSASGK.S               |

|                 |                     |        |        |         |          |         |                                                                 |        |      |                               |
|-----------------|---------------------|--------|--------|---------|----------|---------|-----------------------------------------------------------------|--------|------|-------------------------------|
| *               | HsFLAG-ARP6_Ti_1    | 6.0887 | 0.4211 | 2532.68 | 2533.724 | 9758.6  | 1                                                               | 2143.5 | 60   | 2 R.IAQLEEEEEEQSNMELLNDR.F    |
| *               | HsFLAG-Lin9_Ti_20   | 4.5886 | 0.4247 | 1744.87 | 1745.927 | 9394.3  | 1                                                               | 2027.2 | 70   | 2 K.TTLQVDTLNAELAAER.S        |
| *               | HsFLAG-Lin9_Ti_20   | 4.7334 | 0.2667 | 1514.74 | 1515.66  | 7114.6  | 1                                                               | 1699.1 | 83.3 | 3 K.IGQLEEQLQEAK.E            |
| *               | HsFLAG-Lin9_Ti_20   | 4.7337 | 0.358  | 1461.43 | 1461.528 | 10554   | 1                                                               | 1837.3 | 81.8 | 2 K.RQLEEAEEEAATR.A           |
| *               | HsFLAG-Lin9_Ti_20   | 3.627  | 0.249  | 1151.19 | 1151.268 | 5752.2  | 1                                                               | 1053.3 | 85   | 2 R.RGGPISFSSSR.S             |
| *               | HsFLAG-p53-DNA-D    | 1.9842 | 0.2334 | 1431.36 | 1432.441 | 3368.9  | 9                                                               | 270.6  | 54.2 | 1 K.TSDVNETQPPQSE.-           |
| gij 40255020 re | 10                  | 58     | 36.80% | 201     | 22755    | 8.3     | hypothetical protein LOC64769 [Homo sapiens]                    |        |      |                               |
| *               | HsFLAG-TIP49b_Ti_   | 4.8557 | 0.3712 | 1671.94 | 1671.894 | 6755.1  | 1                                                               | 1472.5 | 80.8 | 4 K.RKQELAETLANLER.Q          |
| *               | HsH2AZ-FLAG_293_    | 3.6184 | 0.2958 | 1515.54 | 1515.707 | 9412.2  | 1                                                               | 1412.8 | 70.8 | 3 R.KQELAETLANLER.Q           |
| *               | HsTIP60_Ti_104.243  | 2.706  | 0.1263 | 1387.21 | 1387.533 | 5774.3  | 1                                                               | 544.9  | 63.6 | 1 K.QELAETLANLER.Q            |
| *               | HsMRGBP-FLAG_Ti_    | 4.3686 | 0.4776 | 2511.92 | 2512.796 | 7611.9  | 1                                                               | 1058.4 | 50   | 2 R.QIYAFEGSYLEDTQMYGNIIR.G   |
| *               | HsYL1-FLAG_Ti_20    | 4.1218 | 0.3338 | 2146.3  | 2146.403 | 9101.5  | 1                                                               | 2309.1 | 44   | 1 K.SSVTSAAAVSALAGVQDQLIEK.R  |
| *               | HsYL1-FLAG_Ti_20    | 5.9833 | 0.4261 | 2146.9  | 2146.403 | 4876.9  | 1                                                               | 1156   | 61.9 | 16 K.SSVTSAAAVSALAGVQDQLIEK.R |
| *               | HsH2AZ-FLAG_293_    | 4.2363 | 0.3357 | 2302.03 | 2302.59  | 6413.9  | 1                                                               | 1067.3 | 37.5 | 4 K.SSVTSAAAVSALAGVQDQLIEK.R  |
| *               | HsMRGBP-FLAG_Ti_    | 4.6823 | 0.3595 | 2302.43 | 2302.59  | 6503.7  | 1                                                               | 836.1  | 47.7 | 15 K.SSVTSAAAVSALAGVQDQLIEK.R |
| *               | HsYL1-FLAG_Ti_20    | 3.621  | 0.3542 | 1469.62 | 1468.483 | 10562.8 | 1                                                               | 859.6  | 53.6 | 9 K.AASSTSSGSHHSHK.K          |
| *               | HsTIP60_Ti_106.098  | 3.2996 | 0.4256 | 1595.86 | 1596.657 | 6418.8  | 1                                                               | 783.5  | 60   | 3 K.AASSTSSGSHHSHKK.R         |
| gij 4506607 re  | 7                   | 17     | 36.70% | 188     | 21634    | 11.7    | ribosomal protein L18 [Homo sapiens]                            |        |      |                               |
| *               | HsFLAG-ARP6_Ti_1    | 3.2053 | 0.1673 | 1407.21 | 1407.613 | 5262.8  | 1                                                               | 1017.6 | 77.3 | 2 R.RTNSTFNQVVLK.R            |
| *               | HsFLAG-FLJ20309_    | 2.6636 | 0.2272 | 1140.82 | 1141.316 | 5324.5  | 1                                                               | 635.1  | 72.2 | 1 R.TNRPPLSLSR.M              |
| *               | HsFlag-les6_293_Ti_ | 4.836  | 0.4021 | 1346.62 | 1346.524 | 7234.9  | 1                                                               | 1840.5 | 83.3 | 3 K.TAVVVGITDDVVR.V           |
| *               | HsFLAG-FLJ20309_    | 4.4246 | 0.1195 | 1461.6  | 1461.698 | 8142.2  | 1                                                               | 1617.1 | 79.2 | 6 K.ILTFDQLALDSPK.G           |
| *               | HsFLAG-TCF3_Ti_1    | 2.9162 | 0.1015 | 1461.67 | 1461.698 | 6466.5  | 4                                                               | 355.1  | 50   | 1 K.ILTFDQLALDSPK.G           |
| *               | HsFLAG-ARP6_Ti_1    | 3.7768 | 0.2986 | 1119.12 | 1117.257 | 8790.9  | 1                                                               | 1759.4 | 90   | 3 K.GCGTVLLSGPR.K             |
| *               | HsFLAG-Lin9_Ti_20   | 2.7133 | 0.1435 | 1032.12 | 1033.132 | 6983.9  | 1                                                               | 949.3  | 88.9 | 1 K.APGTPHSHTK.P              |
| gij 4506681 re  | 6                   | 34     | 36.70% | 158     | 18431    | 10.3    | ribosomal protein S11 [Homo sapiens]                            |        |      |                               |
| *               | HsFLAG-ARP6_Ti_1    | 3.3853 | 0.2297 | 973.43  | 973.161  | 5435.9  | 1                                                               | 1058   | 93.8 | 10 K.RVLLGETGK.E              |
| *               | HsFLAG-ARP6_Ti_1    | 2.1439 | 0.2253 | 1138.5  | 1139.248 | 3628.9  | 2                                                               | 208.1  | 61.1 | 1 K.EAIEGTYIDK.K              |
| *               | HsFLAG-ARP6_Ti_1    | 3.1371 | 0.2949 | 1151.41 | 1151.274 | 6792.1  | 2                                                               | 802.7  | 77.8 | 1 K.CPFTGNVSIR.G              |
| *               | HsFlag-NUFIP_Ti_1   | 2.1152 | 0.138  | 1348.61 | 1348.529 | 6023.1  | 5                                                               | 291.4  | 55   | 1 K.NMSVHLSPCFR.D             |
| *               | HsFLAG-ARP6_Ti_1    | 3.3529 | 0.2882 | 1350.28 | 1348.529 | 4594.2  | 4                                                               | 545.8  | 65   | 9 K.NMSVHLSPCFR.D             |
| *               | HsFLAG-ARP6_Ti_1    | 5.0299 | 0.4291 | 1985.83 | 1987.227 | 6568.8  | 1                                                               | 1384.7 | 67.6 | 12 R.DVQIGDIVTVGECRPLSK.T     |
| gij 5031749 re  | 5                   | 10     | 36.70% | 90      | 9393     | 10      | high-mobility group nucleosomal binding domain 2 [Homo sapiens] |        |      |                               |
| *               | HsFLAG-Lin9_Ti_20   | 2.0862 | 0.1578 | 1359.67 | 1360.64  | 6044.8  | 7                                                               | 587.8  | 58.3 | 2 R.LSAKPAPPKPEPK.P           |
| *               | HsFLAG-Lin9_Ti_20   | 3.1572 | 0.1875 | 1360.25 | 1360.64  | 3808.5  | 4                                                               | 485.5  | 66.7 | 3 R.LSAKPAPPKPEPK.P           |
| *               | HsFLAG-Lin9_Ti_20   | 3.7783 | 0.1514 | 1585.59 | 1585.93  | 6472.7  | 2                                                               | 735.1  | 42.9 | 1 R.LSAKPAPPKPEPKPK.K         |
| *               | HsFLAG-Lin9_Ti_20   | 3.1823 | 0.0991 | 1585.62 | 1585.93  | 5668.6  | 4                                                               | 538.8  | 57.1 | 2 R.LSAKPAPPKPEPKPK.K         |
| *               | HsFLAG-p53-DNA-D    | 3.9044 | 0.3669 | 1887.95 | 1887.915 | 9636.1  | 1                                                               | 1065.4 | 52.9 | 2 K.EGNNPAENGDAKTDQAQK.A      |
| gij 6005942 re  | 20                  | 56     | 36.60% | 806     | 89322    | 5.3     | valosin-containing protein [Homo sapiens]                       |        |      |                               |
| *               | HsFlag-VPS71_Ti_1   | 3.8559 | 0.2201 | 1541.7  | 1541.751 | 5611.5  | 1                                                               | 981.7  | 73.1 | 1 R.LGDVISIQPCPDVK.Y          |
| *               | HsFlag-VPS71_Ti_1   | 5.3748 | 0.4204 | 2585.99 | 2586.988 | 8793.4  | 1                                                               | 1984   | 59.1 | 4 R.IHVLPIDDTVEGITGNLFEVYLK.P |
| *               | HsFlag-VPS71_Ti_1   | 5.2497 | 0.2853 | 2588.32 | 2586.988 | 5017.5  | 1                                                               | 856.3  | 34.1 | 2 R.IHVLPIDDTVEGITGNLFEVYLK.P |
| *               | HsFlag-VPS71_Ti_1   | 2.8683 | 0.1141 | 1425.82 | 1425.673 | 10395.6 | 2                                                               | 861.5  | 65   | 2 K.PYFLEAYRPIR.K             |

|                |                    |        |        |         |          |                                                          |   |        |      |                                           |
|----------------|--------------------|--------|--------|---------|----------|----------------------------------------------------------|---|--------|------|-------------------------------------------|
| *              | HsFlag-VPS71_Ti_10 | 3.052  | 0.0974 | 948.39  | 948.153  | 3912                                                     | 1 | 715.5  | 92.9 | 2 R.KGDIFLVR.G                            |
| *              | HsFLAG-ARP6_Ti_1   | 3.0035 | 0.3143 | 2186.41 | 2187.158 | 8745.1                                                   | 1 | 697.6  | 44.4 | 1 R.EDEEESLNEVGYDDIGGCR.K                 |
| *              | HsFlag-VPS71_Ti_10 | 3.2925 | 0.363  | 1681.13 | 1681.049 | 6564.5                                                   | 1 | 664.7  | 65.4 | 1 K.EMVELPLRHPALFK.A                      |
| *              | HsFlag-VPS71_Ti_10 | 4.0566 | 0.3297 | 2256.68 | 2257.609 | 9768.1                                                   | 1 | 779.9  | 42.5 | 6 R.AVANETGAFFFLINGPEIMSK.L               |
| *              | HsFLAG-FLJ20729_   | 4.6306 | 0.3798 | 1811.44 | 1812.116 | 9363.6                                                   | 1 | 1864.1 | 68.8 | 10 K.NAPAIIFIDELDAIAPK.R                  |
| *              | HsFlag-VPS71_Ti_10 | 4.7958 | 0.3987 | 1431.65 | 1431.774 | 7311.1                                                   | 1 | 1832   | 83.3 | 3 R.IVSQLLTLMDGLK.Q                       |
| *              | HsFlag-VPS71_Ti_10 | 7.246  | 0.4402 | 3674.09 | 3674.97  | 10580.9                                                  | 1 | 2305   | 30.9 | 2 K.LADDVDLEQVANETHGHVGADLAALCSEAALQAIR.K |
| *              | HsFLAG-Lin9_Ti_20  | 2.7293 | 0.1948 | 1329.43 | 1330.486 | 5086.3                                                   | 1 | 799.7  | 81.8 | 1 R.WALSQSNPSALR.E                        |
| *              | HsFLAG-Lin9_Ti_20  | 3.4224 | 0.1924 | 1826.8  | 1825.028 | 8102.9                                                   | 1 | 801.1  | 57.1 | 1 R.ELQELVQYPVEHPDK.F                     |
| *              | HsFlag-VPS71_Ti_10 | 2.189  | 0.1863 | 1251.55 | 1252.422 | 5381.2                                                   | 1 | 584.9  | 59.1 | 1 K.GVLFGPPGCGK.T                         |
| *              | HsFlag-VPS71_Ti_10 | 3.3058 | 0.2935 | 1252.49 | 1252.422 | 5512                                                     | 1 | 920.9  | 72.7 | 2 K.GVLFGPPGCGK.T                         |
| *              | HsFlag-VPS71_Ti_10 | 3.3746 | 0.1657 | 1928.07 | 1925.155 | 6584.1                                                   | 1 | 881.9  | 59.4 | 9 R.QAAPCVLFFDELDSIAK.A                   |
| *              | HsFlag-VPS71_Ti_10 | 3.3763 | 0.1046 | 1682.59 | 1680.972 | 7870.9                                                   | 1 | 817.7  | 57.1 | 1 R.VINQILTEMDGMSTK.K                     |
| *              | HsFLAG-ARP6_Ti_1   | 4.4536 | 0.3234 | 2520.25 | 2519.953 | 5746.4                                                   | 3 | 699.3  | 34.1 | 2 K.NVFIIGATNRPDIIDPAILRPGR.L             |
| *              | HsFlag-VPS71_Ti_10 | 4.2465 | 0.17   | 1558.74 | 1557.827 | 5429.2                                                   | 1 | 1040.2 | 75   | 2 R.LDQLIYIPLPEK.S                        |
| *              | HsFlag-VPS71_Ti_10 | 4.9968 | 0.4292 | 1630.74 | 1630.859 | 7609.2                                                   | 1 | 2201.3 | 87.5 | 3 R.KYEMFAQTLQQSR.G                       |
| gij 24307971 r | 16                 | 176    | 36.60% | 464     | 54003    | 6.8 serine/threonine kinase 38 like [Homo sapiens]       |   |        |      |                                           |
| *              | HsFlag-VPS71_Ti_10 | 4.4213 | 0.3807 | 2120.67 | 2120.37  | 7595.8                                                   | 1 | 1417.3 | 65.6 | 15 K.LTLENFYSNLILQHEER.E                  |
| *              | HsARP6-FLAG_Ti_1   | 4.5275 | 0.1919 | 2121.98 | 2120.37  | 6423.9                                                   | 1 | 1059.1 | 43.8 | 7 K.LTLENFYSNLILQHEER.E                   |
| *              | HsFlag-FLJ20643_Ti | 4.3448 | 0.4565 | 1821.53 | 1821.006 | 8330.2                                                   | 1 | 1670   | 70   | 1 K.KLEVAMEEEGLADEEK.K                    |
| *              | HsH2AZ-FLAG_293_   | 3.336  | 0.239  | 1137.16 | 1137.275 | 4736.3                                                   | 2 | 1083.5 | 88.9 | 8 R.LGLDDFESLK.V                          |
| *              | HsFLAG-ARP6_Ti_1   | 2.2059 | 0.115  | 1065.34 | 1066.216 | 6161.4                                                   | 5 | 554.4  | 71.4 | 2 K.MFYSFQDK.R                            |
| *              | HsFlag-DPCD_Ti_20  | 4.5199 | 0.1745 | 3492.31 | 3491.879 | 7564.2                                                   | 1 | 1314.7 | 30.2 | 2 K.DTLTEEETQFYISETVLAIDAIHQLGFIHR.D      |
| *              | HsFlag-NUFIP_Ti_10 | 2.8822 | 0.2283 | 1357.1  | 1355.574 | 3371.3                                                   | 1 | 518.5  | 72.7 | 2 R.DIKPDNLLLDK.G                         |
| *              | HsFlag-FLJ90652_2  | 2.8592 | 0.2419 | 1210.54 | 1211.367 | 4516.1                                                   | 1 | 485.6  | 65   | 28 K.LSDFGLCTGLK.K                        |
| *              | HsFlag-FLJ90652_2  | 4.2329 | 0.2928 | 1211.36 | 1211.367 | 6417.2                                                   | 1 | 1697.6 | 90   | 38 K.LSDFGLCTGLK.K                        |
| *              | HsFLAG-ARP6_Ti_1   | 3.4297 | 0.2592 | 1339.36 | 1339.541 | 6565.3                                                   | 1 | 1017.5 | 77.3 | 7 K.LSDFGLCTGLK.K                         |
| *              | HsFlag-NUFIP_Ti_20 | 5.3234 | 0.4887 | 2079.51 | 2079.251 | 3718.1                                                   | 1 | 833.6  | 67.6 | 28 R.NLTHNPPSDFSFQNMNSK.R                 |
| *              | HsFlag-NUFIP_Ti_20 | 5.5779 | 0.3926 | 2080.21 | 2079.251 | 11209.4                                                  | 1 | 2417.6 | 45.6 | 4 R.NLTHNPPSDFSFQNMNSK.R                  |
| *              | HsFLAG-p53-DNA-D   | 6.2661 | 0.3891 | 2753.72 | 2754.034 | 10842.6                                                  | 1 | 1787.5 | 35.9 | 2 R.IGNSGVEEIKGHPFFEGVDWEHIR.E            |
| *              | HsFlag-NUFIP_Ti_20 | 3.6412 | 0.33   | 1727.44 | 1726.891 | 6480.8                                                   | 1 | 960.4  | 69.2 | 5 K.GHPFFEGVDWEHIR.E                      |
| *              | HsFlag-VPS71_Ti_10 | 3.4614 | 0.241  | 1238.23 | 1237.485 | 4884.9                                                   | 1 | 981.8  | 85   | 25 R.ERPAAPIEIK.S                         |
| *              | HsFLAG-p53-DNA-D   | 3.6643 | 0.284  | 1565.45 | 1564.781 | 6165.5                                                   | 1 | 1061.2 | 77.3 | 2 K.SKDWVFLNYTYK.R                        |
| gij 4501881 re | 20                 | 443    | 36.60% | 377     | 42051    | 5.4 alpha 1 actin precursor [Homo sapiens]               |   |        |      |                                           |
| gij 4885049 re | 20                 | 443    | 36.60% | 377     | 42019    | 5.4 cardiac muscle alpha actin proprotein [Homo sapiens] |   |        |      |                                           |
| *              | HsFLAG-ARP6_Ti_2   | 3.3564 | 0.3342 | 977.23  | 977.021  | 5082.6                                                   | 1 | 1225.5 | 88.9 | 17 K.AGFAGDDAPR.A                         |
| *              | HsFlag-VPS71_Ti_10 | 2.159  | 0.1032 | 977.47  | 977.021  | 5226.9                                                   | 1 | 385.5  | 61.1 | 2 K.AGFAGDDAPR.A                          |
| *              | HsFLAG-ARP5_Ti_1   | 3.43   | 0.2899 | 1199.05 | 1199.442 | 6548.6                                                   | 1 | 831.6  | 80   | 27 R.AVFPSIVGRPR.H                        |
| *              | HsFLAG-TIP49a_Ti_  | 3.2318 | 0.3146 | 1171.37 | 1172.406 | 4944.3                                                   | 1 | 760.2  | 75   | 54 R.HQGVMVGMGQK.D                        |
| *              | HsFLAG-p53-DNA-D   | 3.5553 | 0.3623 | 1172.01 | 1172.406 | 5155.7                                                   | 1 | 1022.8 | 85   | 49 R.HQGVMVGMGQK.D                        |
| *              | HsFLAG-ARP8_Ti_2   | 3.7228 | 0.4    | 1198.34 | 1199.216 | 4824                                                     | 1 | 494.9  | 65   | 7 K.DSYVGDEAQS.K                          |
| *              | HsFlag-VPS71_Ti_10 | 3.4611 | 0.3002 | 1199.21 | 1199.216 | 3911.9                                                   | 1 | 959.2  | 85   | 11 K.DSYVGDEAQS.K                         |
| *              | HsFLAG-p53-DNA-D   | 2.8615 | 0.2497 | 1355.19 | 1355.404 | 5881                                                     | 1 | 646.6  | 63.6 | 2 K.DSYVGDEAQS.K                          |

|                |                     |        |        |         |          |                                                                             |   |        |      |     |                                 |
|----------------|---------------------|--------|--------|---------|----------|-----------------------------------------------------------------------------|---|--------|------|-----|---------------------------------|
|                | HsFlag-DPCD_Ti_20   | 4.6355 | 0.2069 | 1961.41 | 1962.184 | 8644.2                                                                      | 3 | 1097.1 | 41.7 | 17  | K.YPIEHGIITNWDDMEK.I            |
|                | HsFlag-DPCD_Ti_20   | 4.7092 | 0.1653 | 1962.55 | 1962.184 | 10286.5                                                                     | 1 | 1307.4 | 60   | 38  | K.YPIEHGIITNWDDMEK.I            |
|                | HsFLAG-TIP49b_Ti_   | 3.4873 | 0.339  | 1515.54 | 1516.702 | 6235.6                                                                      | 1 | 470.4  | 65   | 12  | K.IWHHTFYNELR.V                 |
|                | HsFLAG-p53-DNA-D    | 3.5256 | 0.379  | 1516.47 | 1516.702 | 6570.8                                                                      | 1 | 921.4  | 75   | 44  | K.IWHHTFYNELR.V                 |
|                | HsFLAG-ARP6_Ti_1    | 3.5437 | 0.1582 | 1517.38 | 1516.702 | 6065.3                                                                      | 1 | 1106.2 | 57.5 | 2   | K.IWHHTFYNELR.V                 |
|                | Hs293Flag-les2_Ti_1 | 4.6147 | 0.0998 | 1954.42 | 1957.234 | 6565                                                                        | 2 | 1200.2 | 67.6 | 6   | R.VAPEEHPTLLTEAPLNPK.A          |
|                | HsFLAG-p53-DNA-D    | 2.7022 | 0.1896 | 998.54  | 999.167  | 6873.8                                                                      | 9 | 806.7  | 78.6 | 9   | R.DLTDYLMK.I                    |
|                | HsFLAG-Lin9_Ti_20   | 3.6505 | 0.1696 | 1791.77 | 1791.955 | 7019.8                                                                      | 1 | 1188.6 | 45   | 2   | K.SYELPDGQVITIGNER.F            |
|                | HsSrcap_Ti_202_259  | 5.2016 | 0.2868 | 1791.82 | 1791.955 | 5255.9                                                                      | 1 | 1548   | 80   | 115 | K.SYELPDGQVITIGNER.F            |
|                | HsFLAG-ARP6_Ti_1    | 2.8881 | 0.328  | 1161.46 | 1162.387 | 4673.7                                                                      | 1 | 620.1  | 75   | 20  | K.EITALAPSTMK.I                 |
|                | HsFLAG-ARP6_Ti_1    | 2.895  | 0.2843 | 1161.87 | 1162.387 | 4881.7                                                                      | 1 | 872.9  | 80   | 8   | K.EITALAPSTMK.I                 |
|                | HsFLAG-TIP49b_Ti_   | 2.6775 | 0.1641 | 1628.44 | 1629.77  | 9935.8                                                                      | 8 | 643.5  | 50   | 1   | K.QEYDEAGSIVHRK.C               |
| gi 4504345 re  | 4                   | 17     | 36.60% | 142     | 15258    | 8.7 alpha 2 globin [Homo sapiens]                                           |   |        |      |     |                                 |
| gi 4504347 re  | 4                   | 17     | 36.60% | 142     | 15258    | 8.7 alpha 1 globin [Homo sapiens]                                           |   |        |      |     |                                 |
|                | HsFLAG-RPB5MP_2     | 4.1333 | 0.4734 | 1530.34 | 1530.637 | 5355.7                                                                      | 1 | 1404   | 78.6 | 3   | K.VGAHAGEYGAEALER.M             |
|                | HsFLAG-RPB5MP_2     | 3.968  | 0.3797 | 1834.32 | 1835.029 | 7138.8                                                                      | 1 | 1115.2 | 63.3 | 8   | K.TYFPHFDLSHGSAQVK.G            |
|                | HsFLAG-RPB5MP_2     | 2.6805 | 0.1615 | 1088.25 | 1088.295 | 3953.4                                                                      | 5 | 447.7  | 68.8 | 1   | K.LRVDPVNFK.L                   |
|                | HsFLAG-RPB5MP_2     | 4.1087 | 0.3579 | 1254.28 | 1253.481 | 5322.2                                                                      | 1 | 1248.2 | 86.4 | 5   | K.FLASVSTVLTSK.Y                |
| gi 4502027 re  | 18                  | 49     | 36.50% | 609     | 69367    | 6.3 albumin precursor [Homo sapiens]                                        |   |        |      |     |                                 |
| *              | HsFLAG-p53-DNA-D    | 2.2866 | 0.108  | 951.42  | 952.009  | 5369.7                                                                      | 2 | 550.5  | 78.6 | 1   | K.DLGEENFK.A                    |
| *              | HsFLAG-p53-DNA-D    | 4.1739 | 0.3392 | 2491.93 | 2491.858 | 7425.5                                                                      | 1 | 711.7  | 47.5 | 2   | K.ALVLIAFAQYLQQCPFEDHVK.L       |
| *              | HsFLAG-p53-DNA-D    | 2.8193 | 0.1344 | 1149.48 | 1150.317 | 11156.4                                                                     | 2 | 873.4  | 72.2 | 1   | K.LVNEVTEFAK.T                  |
| *              | HsFLAG-p53-DNA-D    | 4.4701 | 0.3332 | 2652.67 | 2651.96  | 9164.9                                                                      | 1 | 1112.7 | 35.7 | 1   | R.LVRPEVDVMCTAFHDNEETFLK.K      |
| *              | HsFLAG-p53-DNA-D    | 5.5552 | 0.3265 | 2779.57 | 2780.134 | 9104                                                                        | 1 | 1777.1 | 37.5 | 1   | R.LVRPEVDVMCTAFHDNEETFLKK.Y     |
|                | HsFLAG-p53-DNA-D    | 3.3501 | 0.1636 | 1056.45 | 1056.25  | 3640.6                                                                      | 1 | 649.3  | 92.9 | 1   | K.KYLYEIAR.R                    |
| *              | HsFLAG-RPB5MP_2     | 2.5513 | 0.3038 | 1443.87 | 1444.504 | 6238.4                                                                      | 1 | 810.5  | 68.2 | 2   | K.YICENQDSISSK.L                |
| *              | HsFLAG-p53-DNA-D    | 4.1298 | 0.1924 | 1547.56 | 1547.764 | 10672.6                                                                     | 1 | 1917   | 81.8 | 1   | K.LKECCEKPLLEK.S                |
| *              | HsFLAG-p53-DNA-D    | 4.2011 | 0.1072 | 2976.58 | 2976.204 | 5959.9                                                                      | 1 | 793.1  | 31.7 | 1   | K.SHCIAEVENDEMPADLPSLAADFVESK.D |
| *              | HsFLAG-p53-DNA-D    | 4.4127 | 0.3954 | 2045.87 | 2046.371 | 4353                                                                        | 1 | 691.4  | 59.4 | 3   | K.VFDEFKPLVEEPQNLK.Q            |
| *              | HsFLAG-p53-DNA-D    | 3.3509 | 0.2244 | 1657.94 | 1658.771 | 7827.9                                                                      | 1 | 1021.5 | 70.8 | 1   | K.QNCELFEQLGEYK.F               |
|                | Hs293Flag-les2_Ti_1 | 3.6586 | 0.4103 | 1640.53 | 1640.921 | 3826.5                                                                      | 1 | 566.3  | 67.9 | 7   | K.KVPQVSTPTLVEVSR.N             |
|                | HsFLAG-TCF3_Ti_1    | 2.9267 | 0.38   | 1511.68 | 1512.746 | 3858.4                                                                      | 1 | 219.1  | 53.8 | 1   | K.VPQVSTPTLVEVSR.N              |
|                | HsFlag-FLJ90652_2   | 3.7941 | 0.3724 | 1511.77 | 1512.746 | 6997.5                                                                      | 1 | 1553.3 | 80.8 | 15  | K.VPQVSTPTLVEVSR.N              |
| *              | HsFLAG-p53-DNA-D    | 6.2389 | 0.4051 | 2675.43 | 2676.035 | 9179.1                                                                      | 1 | 1804.5 | 39.3 | 2   | K.RMPCAEDYLSVVLNQLCVLHEK.T      |
|                | HsFlag-FLJ90652_2   | 3.6243 | 0.2736 | 1139.23 | 1139.183 | 7079.6                                                                      | 1 | 1285.6 | 100  | 2   | K.CCTESLVNR.R                   |
| *              | HsFLAG-p53-DNA-D    | 3.8687 | 0.3148 | 1911.44 | 1912.116 | 5660.3                                                                      | 2 | 545.3  | 53.3 | 3   | R.RPCFSALEVDETYVPK.E            |
| *              | HsFLAG-p53-DNA-D    | 3.2071 | 0.1699 | 1129.35 | 1129.385 | 5632.2                                                                      | 2 | 996.2  | 83.3 | 4   | K.KQTALVELVK.H                  |
| gi 38327552 re | 11                  | 23     | 36.50% | 466     | 52164    | 5.5 Ras-GTPase-activating protein SH3-domain-binding protein [Homo sapiens] |   |        |      |     |                                 |
| gi 5031703 re  | 11                  | 23     | 36.50% | 466     | 52164    | 5.5 Ras-GTPase-activating protein SH3-domain-binding protein [Homo sapiens] |   |        |      |     |                                 |
|                | HsFlag-VPS71_Ti_1   | 3.7811 | 0.3278 | 1864.83 | 1864.129 | 7190.3                                                                      | 1 | 1155.1 | 71.4 | 1   | R.QYYTLLNQAPDMLHR.F             |
|                | HsFlag-VPS71_Ti_1   | 4.784  | 0.4359 | 2364.87 | 2365.521 | 5352.2                                                                      | 1 | 617.4  | 50   | 1   | K.NSSYVHGGLDNSGKPADAVYGQK.E     |
|                | HsFlag-VPS71_Ti_1   | 2.9214 | 0.304  | 1466.55 | 1467.606 | 4173.9                                                                      | 1 | 183.7  | 50   | 1   | K.VMSQNFTNCHTK.I                |
|                | HsFlag-VPS71_Ti_1   | 3.5588 | 0.31   | 1468.58 | 1467.606 | 9017.6                                                                      | 1 | 976.1  | 68.2 | 2   | K.VMSQNFTNCHTK.I                |



|               |                     |        |        |         |          |        |   |        |      |                                                                        |
|---------------|---------------------|--------|--------|---------|----------|--------|---|--------|------|------------------------------------------------------------------------|
|               | HsFlag-VPS71_Ti_10  | 4.0838 | 0.145  | 2988.97 | 2987.363 | 6830.4 | 1 | 815.7  | 31.5 | 1 R.HVDAHATLNDGVVVQVMGLLSNNNQALR.R                                     |
|               | HsFLAG-ARP6_Ti_1    | 2.5926 | 0.2903 | 1739.39 | 1740.027 | 6968.3 | 3 | 431.3  | 46.7 | 1 R.FMQTFVLAPEGSVANK.F                                                 |
|               | HsARP6-FLAG_Ti_1    | 2.8718 | 0.356  | 1211.54 | 1211.365 | 6198.6 | 1 | 1288.2 | 93.8 | 3 K.FYVHNDIFR.Y                                                        |
|               | HsFlag-VPS71_Ti_10  | 3.3408 | 0.3758 | 1886.62 | 1886.026 | 6798.1 | 1 | 776.8  | 55.9 | 1 K.SSSPAPADIAQTVQEDLR.T                                               |
|               | HsFLAG-p53-DNA-D    | 2.6581 | 0.3011 | 1879.53 | 1880.241 | 3819.9 | 2 | 241.6  | 44.4 | 1 K.NLPPSGAVPVTGIPPHVVK.V                                              |
|               | HsFlag-VPS71_Ti_10  | 4.5597 | 0.2543 | 1575.64 | 1574.733 | 9011.7 | 1 | 2004.9 | 83.3 | 2 K.DFFQSYGNVVELR.I                                                    |
|               | HsFLAG-ARP6_Ti_1    | 5.2479 | 0.5061 | 1939.73 | 1939.175 | 7610   | 1 | 1903.9 | 71.9 | 9 K.LPNFGFVVFDSEPVQK.V                                                 |
| gi 14211889 r | 4                   | 67     | 36.40% | 99      | 11250    |        |   |        |      | 4.9 dpy-30-like protein [Homo sapiens]                                 |
|               | HsFLAG-p53-DNA-D    | 5.0352 | 0.4131 | 2126.12 | 2126.588 | 4290.1 | 1 | 849.1  | 65.8 | 31 R.AYLDQTVVPILLQGLAVLAK.E                                            |
|               | HsFLAG-p53-DNA-D    | 6.5927 | 0.3972 | 2126.25 | 2126.588 | 8924.3 | 1 | 2870.1 | 50   | 17 R.AYLDQTVVPILLQGLAVLAK.E                                            |
| *             | HsSrcap_Ti_205.498  | 4.3554 | 0.3513 | 1887.65 | 1888.217 | 6843.3 | 1 | 867.3  | 60   | 13 K.ERPPNPIEFLASYLLK.N                                                |
| *             | HsFLAG-BC014022_    | 5.0225 | 0.2688 | 1887.97 | 1888.217 | 7217.7 | 1 | 1753.3 | 50   | 6 K.ERPPNPIEFLASYLLK.N                                                 |
| gi 4826659 re | 8                   | 16     | 36.00% | 272     | 30629    |        |   |        |      | 6 F-actin capping protein beta subunit [Homo sapiens]                  |
| *             | HsFlag-FLJ90652_29  | 2.5844 | 0.0848 | 1107.95 | 1109.314 | 7854   | 1 | 861    | 81.2 | 1 R.RLPPQQIEK.N                                                        |
| *             | HsFLAG-FLJ20729_    | 4.0844 | 0.245  | 2784.98 | 2785.127 | 3465.9 | 1 | 388.7  | 41.7 | 5 K.NLSDLIDLVPSLCEDLLSSVDQPLK.I                                        |
| *             | HsFlag-FLJ90652_29  | 4.1554 | 0.3287 | 2785.97 | 2785.127 | 6050.7 | 1 | 938.6  | 33.3 | 1 K.NLSDLIDLVPSLCEDLLSSVDQPLK.I                                        |
| *             | HsFLAG-ARP6_Ti_1    | 3.9403 | 0.3153 | 2219.89 | 2219.433 | 6925.9 | 1 | 1080.2 | 38.2 | 2 R.SPWSNKYDPPLEDGAMPSAR.L                                             |
| *             | HsFlag-FLJ90652_29  | 3.2683 | 0.3706 | 2221.62 | 2219.433 | 3908.1 | 1 | 389.5  | 47.4 | 1 R.SPWSNKYDPPLEDGAMPSAR.L                                             |
| *             | HsFlag-FLJ90652_29  | 4.8923 | 0.3784 | 1697.43 | 1697.845 | 8202.5 | 1 | 2177.1 | 80.8 | 2 R.KLEVEANNAFDQYR.D                                                   |
| *             | HsFlag-FLJ90652_29  | 4.313  | 0.2417 | 1686.3  | 1686.828 | 7819.8 | 1 | 1722.2 | 73.1 | 2 K.GCWDSIHVVEVQEK.S                                                   |
| *             | HsFlag-DPCD_Ti_20   | 3.7528 | 0.2956 | 1771.09 | 1771.847 | 7246.6 | 1 | 1061.5 | 60   | 2 K.DETVSDCSPHIANIGR.L                                                 |
| gi 14210536 r | 13                  | 213    | 35.90% | 446     | 49857    |        |   |        |      | 4.9 tubulin, beta 6 [Homo sapiens]                                     |
| gi 89047323 r | 13                  | 213    | 39.70% | 403     | 45043    |        |   |        |      | 4.9 PREDICTED: similar to tubulin, beta 6 [Homo sapiens]               |
|               | HsSrcap_Ti_206.299  | 3.8732 | 0.2209 | 2828.36 | 2828.119 | 7315.4 | 1 | 679.9  | 38   | 2 R.SGPFQQLFRPDNFIFGQTGAGNNWAK.G                                       |
|               | HsFLAG-ARP6_Ti_1    | 3.7586 | 0.1316 | 2830.72 | 2828.119 | 9114.5 | 4 | 803.9  | 27   | 1 R.SGPFQQLFRPDNFIFGQTGAGNNWAK.G                                       |
|               | HsFLAG-ARP6_Ti_1    | 4.2407 | 0.3299 | 1352.9  | 1352.65  | 7307.1 | 1 | 1886.4 | 90.9 | 4 R.IMNTFSVMPSPK.V                                                     |
|               | HsFLAG-ARP6_Ti_1    | 6.4706 | 0.4855 | 4594.76 | 4595.903 | 4988.3 | 1 | 541.4  | 23.7 | 83 K.VSDTVVEPYNATLSVHQLVENTDETYCIDNEALYDICFR.T                         |
|               | HsYL1_Ti_103.3223.  | 3.7161 | 0.3356 | 2636.29 | 2636.98  | 6938.8 | 1 | 781.3  | 41.7 | 1 K.LTTPTYGDLNHLVSATMSGVTTSLR.F                                        |
|               | HsFLAG-ARP6_Ti_1    | 2.1817 | 0.2119 | 1130.19 | 1131.277 | 3484.6 | 1 | 331.1  | 72.2 | 1 R.FPGQLNADLR.K                                                       |
|               | HsFLAG-ARP6_Ti_1    | 3.1035 | 0.1934 | 1133.31 | 1131.277 | 4537.1 | 1 | 968.3  | 94.4 | 20 R.FPGQLNADLR.K                                                      |
|               | HsFLAG-ARP6_Ti_1    | 2.7216 | 0.2275 | 1259.45 | 1259.451 | 6377.3 | 1 | 1130.1 | 85   | 3 R.FPGQLNADLRK.L                                                      |
|               | Hs293Flag-les2_Ti_1 | 4.1115 | 0.2404 | 1271.88 | 1272.594 | 7432.2 | 1 | 1437.4 | 85   | 9 R.KLAVNMVPPFR.L                                                      |
|               | HsFLAG-Lin9_Ti_202  | 3.7432 | 0.2947 | 1144.31 | 1144.42  | 4934.2 | 1 | 1119.4 | 94.4 | 37 K.LAVNMVPPFR.L                                                      |
|               | HsFLAG-ARP6_Ti_1    | 3.784  | 0.2563 | 1621.62 | 1621.94  | 4747.2 | 1 | 1118   | 76.9 | 9 R.LHFFMPGFAPLTSR.G                                                   |
|               | HsFLAG-ARP6_Ti_1    | 3.1514 | 0.3044 | 1065.99 | 1066.201 | 5998.7 | 1 | 1325.1 | 87.5 | 4 R.NMMAACDPR.H                                                        |
|               | HsFLAG-ARP6_Ti_1    | 4.0978 | 0.3327 | 1699.12 | 1697.888 | 5299.1 | 1 | 715    | 61.5 | 39 K.NSSYFVEWIPNNVK.V                                                  |
| gi 57242777 r | 3                   | 33     | 35.90% | 103     | 11967    |        |   |        |      | 5.9 c-myc binding protein [Homo sapiens]                               |
| *             | HsFLAG-ARP6_Ti_1    | 4.6668 | 0.3961 | 2275.58 | 2276.635 | 5343.9 | 1 | 623.8  | 50   | 23 K.VLVALYEEPEKPNALSDFLK.H                                            |
| *             | HsFlag-VPS71_Ti_10  | 4.7962 | 0.4065 | 2276.57 | 2276.635 | 5246.8 | 1 | 1034.4 | 42.1 | 7 K.VLVALYEEPEKPNALSDFLK.H                                             |
| *             | HsFlag-FLJ90652_29  | 3.7172 | 0.2362 | 1898.98 | 1898.129 | 9306.6 | 1 | 1129.1 | 59.4 | 3 K.HHLGAATPENPEIELLR.L                                                |
| gi 14110414 r | 11                  | 47     | 35.60% | 306     | 32835    |        |   |        |      | 8.2 heterogeneous nuclear ribonucleoprotein D isoform c [Homo sapiens] |
| gi 14110420 r | 11                  | 47     | 30.70% | 355     | 38434    |        |   |        |      | 7.8 heterogeneous nuclear ribonucleoprotein D isoform a [Homo sapiens] |
|               | HsFlag-NUFIP_Ti_20  | 2.9    | 0.3341 | 1543.82 | 1543.636 | 9211.5 | 1 | 945    | 66.7 | 1 R.HSEAATAQREEWK.M                                                    |

|               |                    |        |        |         |          |        |   |        |      |    |                                                                                   |
|---------------|--------------------|--------|--------|---------|----------|--------|---|--------|------|----|-----------------------------------------------------------------------------------|
|               | HsFLAG-p53-DNA-D   | 4.0049 | 0.2653 | 1484.79 | 1484.753 | 7556.2 | 1 | 1639.3 | 83.3 | 4  | K.MFIGGLSWDTTKK.D                                                                 |
|               | HsFLAG-FLJ20729_   | 3.3271 | 0.2535 | 1921.24 | 1921.167 | 5550.5 | 1 | 614.8  | 56.2 | 2  | K.FGEVVDCTLKLDPITGR.S                                                             |
|               | HsFLAG-p53-DNA-D   | 2.9122 | 0.228  | 914.45  | 915.123  | 2938.3 | 3 | 645.5  | 85.7 | 3  | R.GFGFVLFK.E                                                                      |
|               | HsFLAG-p53-DNA-D   | 2.0301 | 0.1206 | 915.7   | 915.123  | 8175.2 | 7 | 803    | 78.6 | 1  | R.GFGFVLFK.E                                                                      |
|               | HsFLAG-ARP6_Ti_1   | 4.9611 | 0.3419 | 1616.79 | 1617.839 | 6888.4 | 1 | 2402.6 | 82.1 | 4  | K.KIFVGGLSPDTPPEEK.I                                                              |
|               | HsFLAG-ARP6_Ti_1   | 4.4488 | 0.3532 | 2162.16 | 2162.375 | 8648.3 | 1 | 1345.8 | 58.3 | 9  | R.EYFGGFGEVESIELPMDNK.T                                                           |
|               | HsFlag-VPS71_Ti_1  | 4.5374 | 0.389  | 1731.77 | 1731.952 | 5880.2 | 1 | 1013.7 | 69.2 | 19 | R.GFCFITFKEEPEVK.K                                                                |
|               | HsFLAG-p53-DNA-D   | 3.4851 | 0.3362 | 1859.68 | 1860.126 | 9002.8 | 1 | 905.8  | 57.1 | 2  | R.GFCFITFKEEPEVKK.I                                                               |
|               | HsFLAG-p53-DNA-D   | 3.0144 | 0.2175 | 1046.48 | 1046.214 | 6101.3 | 1 | 1208.2 | 93.8 | 1  | K.KYHNVGLSK.C                                                                     |
|               | HsFlag-VPS71_Ti_1  | 2.1614 | 0.2732 | 917.54  | 918.04   | 5262.8 | 1 | 502.1  | 71.4 | 1  | K.YHNVGLSK.C                                                                      |
| gi 4502549 re | 4                  | 13     | 35.60% | 149     | 16838    |        |   |        |      |    | 4.2 calmodulin 2 [Homo sapiens]                                                   |
| gi 5901912 re | 4                  | 13     | 35.60% | 149     | 16838    |        |   |        |      |    | 4.2 calmodulin 1 (phosphorylase kinase, delta) [Homo sapiens]                     |
| gi 58218968 r | 4                  | 13     | 35.60% | 149     | 16838    |        |   |        |      |    | 4.2 calmodulin 3 [Homo sapiens]                                                   |
|               | HsFLAG-ARP6_Ti_1   | 2.3901 | 0.2026 | 956.46  | 957.071  | 3057.2 | 8 | 202.6  | 64.3 | 1  | K.EAFSLFDK.D                                                                      |
|               | HsFLAG-ARP6_Ti_1   | 3.7735 | 0.2768 | 1353.32 | 1353.444 | 5115.6 | 1 | 1108   | 85   | 2  | K.MKDTDSEEEIR.E                                                                   |
|               | HsFLAG-ARP6_Ti_1   | 3.3886 | 0.3511 | 1265.89 | 1266.353 | 5573.8 | 1 | 1070.7 | 77.3 | 4  | K.DGNGYISAAELR.H                                                                  |
|               | HsFLAG-ARP6_Ti_1   | 5.205  | 0.4853 | 2492.34 | 2491.704 | 5641.9 | 1 | 1040.1 | 54.8 | 6  | R.EADIDGDGQVNYEEFVQMMTAK.-                                                        |
| gi 89030033 r | 15                 | 95     | 35.50% | 442     | 47563    |        |   |        |      |    | 9.2 PREDICTED: hypothetical protein LOC84726 isoform 3 [Homo sapiens]             |
| gi 89030649 r | 15                 | 95     | 35.50% | 442     | 47418    |        |   |        |      |    | 9.1 PREDICTED: similar to HLA-B associated transcript 2 isoform 12 [Homo sapiens] |
|               | HsFLAG-KIAA0515_   | 2.391  | 0.2466 | 1073.61 | 1074.219 | 6657.1 | 1 | 636.5  | 75   | 7  | K.YSTLSLFDK.Y                                                                     |
|               | HsFLAG-KIAA0515_   | 3.0827 | 0.1453 | 840.29  | 839.97   | 3998.2 | 1 | 991.8  | 100  | 1  | R.HGLQSLGK.V                                                                      |
|               | HsFLAG-KIAA0515_   | 2.466  | 0.0825 | 1164.3  | 1165.436 | 5127.9 | 9 | 530.4  | 65   | 2  | R.MPPPANLPSLK.S                                                                   |
|               | HsFLAG-KIAA0515_   | 3.6077 | 0.1581 | 1168.37 | 1166.363 | 6498.3 | 2 | 1325.2 | 85   | 1  | K.GNDPNIVIVPK.D                                                                   |
|               | HsFLAG-KIAA0515_   | 2.7943 | 0.2972 | 1836.44 | 1837.04  | 3485.8 | 2 | 311.8  | 47.1 | 1  | K.SATASQPPESLPQPLQK.S                                                             |
|               | HsFLAG-KIAA0515_   | 4.3695 | 0.245  | 2598.44 | 2598.83  | 4752.8 | 1 | 785    | 47.9 | 7  | K.SVSNLQKPTQSSISQENTNSVPGGPK.S                                                    |
|               | HsFLAG-KIAA0515_   | 5.3966 | 0.2823 | 2598.52 | 2598.83  | 6457.6 | 1 | 1407.9 | 38.5 | 2  | K.SVSNLQKPTQSSISQENTNSVPGGPK.S                                                    |
|               | HsFLAG-KIAA0515_   | 4.8296 | 0.3679 | 1841.54 | 1841.973 | 5817.7 | 1 | 1305.1 | 67.6 | 4  | K.PTQSSISQENTNSVPGGPK.S                                                           |
|               | HsFLAG-KIAA0515_   | 4.3862 | 0.2627 | 1843.34 | 1841.973 | 7585.6 | 2 | 1078   | 41.2 | 1  | K.PTQSSISQENTNSVPGGPK.S                                                           |
|               | HsFLAG-KIAA0515_   | 2.4348 | 0.0813 | 903.46  | 904.013  | 4020.5 | 8 | 315.1  | 71.4 | 1  | K.SWAQLNGK.P                                                                      |
|               | HsFLAG-KIAA0515_   | 3.2516 | 0.2889 | 1896.38 | 1896.15  | 4673.3 | 1 | 582.9  | 56.2 | 1  | R.GSSRLLSFSPEEFPTLK.A                                                             |
|               | HsFLAG-KIAA0515_   | 3.7032 | 0.0989 | 1509.55 | 1508.755 | 4468.6 | 1 | 796.7  | 70.8 | 9  | R.LLSFSPEEFPTLK.A                                                                 |
|               | HsFLAG-KIAA0515_   | 2.9535 | 0.2142 | 1431.48 | 1431.632 | 4961   | 1 | 663.7  | 61.5 | 1  | K.GVLDLSYGPGLSLR.P                                                                |
|               | HsFLAG-KIAA0515_   | 5.6894 | 0.4755 | 1857.7  | 1858.059 | 7413.6 | 1 | 2156.5 | 76.5 | 56 | R.HIISATSLSTSPTELGSR.N                                                            |
|               | HsFLAG-KIAA0515_   | 2.7436 | 0.2778 | 1729.02 | 1729.675 | 3017.7 | 1 | 377.2  | 55.9 | 1  | R.NSSTGDGAPSSACTSDSK.D                                                            |
| gi 4503475 re | 19                 | 170    | 35.20% | 463     | 50470    |        |   |        |      |    | 9 eukaryotic translation elongation factor 1 alpha 2 [Homo sapiens]               |
|               | HsFLAG-ARP6_Ti_1   | 4.6953 | 0.3853 | 1589.5  | 1589.835 | 9070.4 | 1 | 1844.8 | 71.4 | 16 | K.THINIVVIGHVDSGK.S                                                               |
|               | HsSrcap_Ti_206.252 | 2.9506 | 0.4242 | 1589.65 | 1589.835 | 7888.4 | 1 | 828.8  | 60.7 | 1  | K.THINIVVIGHVDSGK.S                                                               |
|               | HsTIP60_Ti_105.137 | 1.9632 | 0.1372 | 1120.39 | 1121.279 | 6519.3 | 3 | 584.4  | 66.7 | 1  | K.STTTGHLIYK.C                                                                    |
|               | HsFLAG-p53-DNA-D   | 3.1463 | 0.3628 | 1121.3  | 1121.279 | 8751.6 | 1 | 1234   | 77.8 | 21 | K.STTTGHLIYK.C                                                                    |
|               | HsFLAG-ARP5_Ti_1   | 2.541  | 0.1763 | 1611.43 | 1611.851 | 9393   | 1 | 594.7  | 53.8 | 1  | R.TIEKFEKEAAEMGK.G                                                                |
| *             | HsFLAG-p53-DNA-D   | 3.8789 | 0.2921 | 1419.38 | 1419.623 | 6386.6 | 1 | 1309.1 | 77.3 | 4  | K.YYITIIDAPGHR.D                                                                  |
|               | HsSrcap_Ti_204.512 | 3.2119 | 0.2572 | 2910.96 | 2911.263 | 8701.9 | 2 | 388.9  | 28.6 | 2  | K.NMITGTSQADCAVLIVAAGVGEFEAGISK.N                                                 |
|               | HsFlag-VPS71_Ti_1  | 4.5563 | 0.1844 | 2913.87 | 2911.263 | 6269.6 | 1 | 1050.3 | 33   | 12 | K.NMITGTSQADCAVLIVAAGVGEFEAGISK.N                                                 |

|               |                    |        |        |         |          |        |   |        |      |    |                                                                                                              |
|---------------|--------------------|--------|--------|---------|----------|--------|---|--------|------|----|--------------------------------------------------------------------------------------------------------------|
|               | HsFlag-VPS71_Ti_10 | 3.8784 | 0.3946 | 1314.66 | 1315.555 | 4878   | 1 | 770    | 72.7 | 24 | R.EHALLAYTLGVK.Q                                                                                             |
|               | HsFLAG-p53-DNA-D   | 3.6805 | 0.3101 | 1315.6  | 1315.555 | 7027.5 | 1 | 1495   | 86.4 | 27 | R.EHALLAYTLGVK.Q                                                                                             |
| *             | HsFLAG-Lin9_Ti_20  | 4.0359 | 0.2129 | 2595.03 | 2595.91  | 6969.8 | 1 | 909.6  | 45.8 | 2  | K.EGNASGVSLLEALDITLPPTRPTDK.P                                                                                |
| *             | HsFLAG-Lin9_Ti_20  | 4.0239 | 0.2288 | 2597.46 | 2595.91  | 5395.1 | 1 | 808.6  | 33.3 | 1  | K.EGNASGVSLLEALDITLPPTRPTDK.P                                                                                |
| *             | HsFLAG-p53-DNA-D   | 4.777  | 0.3723 | 3920.26 | 3919.511 | 9115.3 | 1 | 772.1  | 21.4 | 2  | K.EGNASGVSLLEALDITLPPTRPTDKPLRLPLQDVYK.I                                                                     |
|               | HsFlag-NUFIP_Ti_20 | 3.5749 | 0.2319 | 1342.49 | 1342.624 | 6073.4 | 1 | 787.6  | 70   | 33 | K.PLRLPLQDVYK.I                                                                                              |
|               | HsFLAG-ARP6_Ti_1   | 4.3757 | 0.2664 | 1343.52 | 1342.624 | 7402.5 | 1 | 1687.2 | 57.5 | 5  | K.PLRLPLQDVYK.I                                                                                              |
|               | HsFlag-DPCD_Ti_20  | 1.8412 | 0.2195 | 1025.34 | 1026.224 | 4853.1 | 6 | 236.2  | 60   | 1  | K.IGGIGTVPVGR.V                                                                                              |
|               | HsFLAG-ARP6_Ti_1   | 3.7953 | 0.3438 | 1026.89 | 1026.224 | 5194.3 | 2 | 970.8  | 85   | 12 | K.IGGIGTVPVGR.V                                                                                              |
| *             | HsFLAG-p53-DNA-D   | 3.9705 | 0.3563 | 2571.2  | 2573.066 | 6558.7 | 1 | 577    | 41.3 | 2  | R.VETGILRPGMVVTFAPVNITTEVK.S                                                                                 |
| *             | HsFLAG-p53-DNA-D   | 4.8242 | 0.3307 | 2572.29 | 2573.066 | 5365   | 1 | 891.3  | 35.9 | 3  | R.VETGILRPGMVVTFAPVNITTEVK.S                                                                                 |
| gi 7657649 re | 6                  | 21     | 35.20% | 352     | 39595    |        |   |        |      |    | 5.2 tropomodulin 3 (ubiquitous) [Homo sapiens]                                                               |
| *             | HsFLAG-ARP6_Ti_1   | 4.5511 | 0.3254 | 1933.35 | 1934.061 | 5678.6 | 1 | 1436.3 | 71.9 | 4  | K.DLDEDELLGNLSETELK.Q                                                                                        |
| *             | HsFLAG-Lin9_Ti_20  | 3.9116 | 0.3378 | 2328.69 | 2327.596 | 7285.1 | 1 | 615.7  | 45   | 3  | K.QLETVLDLDPENALLPAGFR.Q                                                                                     |
| *             | HsFlag-DPCD_Ti_20  | 4.4552 | 0.2714 | 3886.24 | 3887.311 | 8622.2 | 1 | 737.2  | 21.4 | 3  | K.VSLDPELEEALTSASDTELCDLAAILGMHNLITNTK.F                                                                     |
| *             | HsFlag-DPCD_Ti_20  | 3.9809 | 0.4774 | 2139.74 | 2139.41  | 4990.5 | 1 | 642.2  | 58.3 | 7  | K.ILPVFDEPPNPTNVEESLK.R                                                                                      |
| *             | HsFLAG-Lin9_Ti_20  | 3.0941 | 0.2567 | 2315.56 | 2316.703 | 9976.4 | 1 | 645.4  | 40.5 | 1  | K.SLNVESNFITGVGILALIDALR.D                                                                                   |
| *             | HsFLAG-Lin9_Ti_20  | 4.4261 | 0.315  | 3330.23 | 3330.803 | 5527.3 | 1 | 466.5  | 24.2 | 3  | K.SLNVESNFITGVGILALIDALRDNETLAEK.I                                                                           |
| gi 34098946 r | 7                  | 23     | 35.20% | 324     | 35924    |        |   |        |      |    | 9.9 nuclease sensitive element binding protein 1 [Homo sapiens]                                              |
|               | HsFLAG-ARP6_Ti_1   | 3.925  | 0.3759 | 1745.19 | 1745.93  | 6667.6 | 1 | 1504.7 | 75   | 2  | R.NDTKEDVFVHQTAIK.K                                                                                          |
|               | HsFlag-NUFIP_Ti_10 | 3.8133 | 0.4608 | 1797.85 | 1796.882 | 6497.5 | 1 | 815    | 59.4 | 9  | R.SVGDGTEVEFDVVEGEG.K                                                                                        |
| *             | HsFlag-NUFIP_Ti_10 | 2.9823 | 0.2566 | 1696.4  | 1696.858 | 5404.5 | 1 | 889.3  | 55.6 | 1  | K.GAEANVTGPGGVPVQGSK.Y                                                                                       |
| *             | HsFLAG-ARP6_Ti_1   | 4.8538 | 0.3332 | 1690.43 | 1689.692 | 9873.1 | 1 | 2526.5 | 84.6 | 4  | R.NYQQNYQNSSEGEK.N                                                                                           |
| *             | HsFlag-NUFIP_Ti_11 | 2.7615 | 0.089  | 1131.47 | 1130.353 | 5577.9 | 4 | 643.1  | 78.6 | 2  | R.RFPPYYMR.R                                                                                                 |
| *             | HsFlag-NUFIP_Ti_10 | 5.4859 | 0.3595 | 3225.31 | 3225.48  | 6978   | 1 | 606.3  | 27.6 | 4  | R.RPQYSNPPVQGEVMEGADNQGAGEQGRPVR.Q                                                                           |
| *             | HsFlag-NUFIP_Ti_11 | 2.7599 | 0.1694 | 1266.36 | 1266.399 | 8339.5 | 1 | 797.3  | 70   | 1  | R.RPENPKPQDGK.E                                                                                              |
| gi 4504897 re | 9                  | 53     | 35.00% | 529     | 57862    |        |   |        |      |    | 5.4 karyopherin alpha 2 [Homo sapiens]                                                                       |
| gi 89042174 r | 9                  | 53     | 35.00% | 529     | 57862    |        |   |        |      |    | 5.4 PREDICTED: similar to Importin alpha-2 subunit (Karyopherin alpha-2 subunit) (SRP1-alpha) (RAG cohort pr |
| gi 89042170 r | 9                  | 53     | 35.00% | 529     | 57862    |        |   |        |      |    | 5.4 PREDICTED: similar to Importin alpha-2 subunit (Karyopherin alpha-2 subunit) (SRP1-alpha) (RAG cohort pr |
|               | HsTIP60_Ti_103.178 | 4.4208 | 0.4248 | 1877.59 | 1877.962 | 5080.1 | 1 | 951.1  | 68.8 | 2  | R.NVSSFPDDATSPLQENR.N                                                                                        |
|               | HsTIP60_Ti_105.224 | 3.7573 | 0.289  | 1690.43 | 1689.822 | 6639   | 1 | 1166.4 | 67.9 | 4  | R.NNQGTVNWSVDDIVK.G                                                                                          |
|               | HsTIP60_Ti_103.166 | 5.2124 | 0.3719 | 1901.53 | 1902.031 | 8038.3 | 1 | 1564.7 | 64.7 | 5  | K.GINSSNVENQLQATQAAR.K                                                                                       |
|               | HsTIP60_Ti_105.320 | 4.3819 | 0.3954 | 2844.32 | 2844.027 | 7978.5 | 1 | 996.2  | 42   | 5  | R.TDCSPIQFESAWALTNISGTSSEQTK.A                                                                               |
|               | HsFLAG-TIP49a_Ti_  | 3.8466 | 0.1175 | 2666.91 | 2667.102 | 3563.5 | 1 | 436    | 45.8 | 2  | K.YGAVDPLLALLAVPDMSSLACGYLR.N                                                                                |
|               | HsFLAG-Lin9_Ti_20  | 4.2375 | 0.4047 | 1944.29 | 1944.282 | 4852.7 | 1 | 891.2  | 67.6 | 17 | K.NPAPPIDAVEQILPTLVR.L                                                                                       |
|               | HsTIP60_Ti_106.275 | 4.3794 | 0.2575 | 1551.73 | 1550.882 | 4436.8 | 1 | 789.3  | 71.4 | 10 | K.LLGASELPVTPALR.A                                                                                           |
|               | HsMRGBP-FLAG_Ti_   | 3.504  | 0.2646 | 3357.5  | 3354.825 | 6654   | 1 | 880.3  | 28.1 | 1  | R.AIGNIVTGTDEQTQVVIDAGALAVFPSLLTNP.K.T                                                                       |
|               | HsFLAG-Lin9_Ti_20  | 5.9461 | 0.4729 | 1972.6  | 1972.376 | 7737   | 1 | 2053.7 | 70.6 | 7  | K.IILVILDAISNIFQAAEK.L                                                                                       |
| gi 4506455 re | 6                  | 23     | 35.00% | 331     | 38890    |        |   |        |      |    | 5 reticulocalbin 1 precursor [Homo sapiens]                                                                  |
| *             | HsFLAG-ARP6_Ti_1   | 4.8536 | 0.423  | 2137.36 | 2137.308 | 6595.3 | 1 | 1116.1 | 61.1 | 4  | K.IVDRIDNDGDGFVTTEELK.T                                                                                      |
| *             | HsFLAG-ARP6_Ti_1   | 2.8865 | 0.2233 | 1125.9  | 1126.301 | 5457.7 | 1 | 1262.9 | 87.5 | 2  | K.RYIFDNVAK.V                                                                                                |
| *             | HsFLAG-ARP6_Ti_1   | 5.0923 | 0.4155 | 1517.49 | 1516.729 | 7555   | 1 | 2185.9 | 87.5 | 13 | K.EIVVLETLEDIDK.N                                                                                            |
| *             | HsFLAG-ARP6_Ti_1   | 4.4495 | 0.2751 | 3700.42 | 3699.854 | 7021.3 | 1 | 847.6  | 28.2 | 1  | K.NGDGFVDQDEYIADMFSHEENGPEPDWVLSER.E                                                                         |

|               |                   |        |        |         |          |         |                                                              |        |      |                                      |
|---------------|-------------------|--------|--------|---------|----------|---------|--------------------------------------------------------------|--------|------|--------------------------------------|
| *             | HsFLAG-ARP6_Ti_1  | 4.1403 | 0.3757 | 1951.33 | 1951.108 | 4861    | 1                                                            | 858.4  | 66.7 | 2 R.HWILPQDYDHAQAEAR.H               |
| *             | HsFLAG-ARP6_Ti_1  | 4.0196 | 0.3072 | 3130.48 | 3132.469 | 9427.5  | 1                                                            | 858.7  | 26.9 | 1 K.LTKEEILENWNMFVGSQATNYGEDLTK.N    |
| gi 4827040 re | 37                | 182    | 34.80% | 955     | 108694   | 10.2    | thyroid hormone receptor associated protein 3 [Homo sapiens] |        |      |                                      |
| *             | HsFLAG-Lin9_Ti_20 | 5.7077 | 0.3907 | 3142.77 | 3142.19  | 8119.2  | 1                                                            | 1098.1 | 30.2 | 2 K.DSRPSQAAGDNQGDEVKEQTFSGGTSQDTK.A |
| *             | HsFLAG-ARP6_Ti_2  | 4.4129 | 0.3566 | 2056.52 | 2056.153 | 3282.6  | 1                                                            | 538.5  | 52.6 | 11 K.ASESSKPWPDATYGTGSASR.A          |
| *             | HsFLAG-FLJ20309_  | 3.4917 | 0.2551 | 1017.38 | 1017.127 | 4826.1  | 2                                                            | 959.7  | 83.3 | 3 R.ASAVSELSPR.E                     |
| *             | HsFLAG-p53-DNA-D  | 2.4044 | 0.2619 | 984.57  | 985.172  | 3984.3  | 1                                                            | 264.7  | 75   | 1 K.SPLQSVVVR.R                      |
| *             | HsFLAG-Lin9_Ti_20 | 3.2727 | 0.1249 | 984.9   | 985.172  | 6572.2  | 1                                                            | 1293.4 | 93.8 | 7 K.SPLQSVVVR.R                      |
| *             | HsFLAG-Lin9_Ti_20 | 3.6196 | 0.3879 | 2606.62 | 2607.704 | 8319.2  | 1                                                            | 668.2  | 38.5 | 3 K.SPPSTGSTYGSSQKEESAASGGAAYTK.R    |
| *             | HsFLAG-ARP6_Ti_2  | 4.2426 | 0.4799 | 2607.73 | 2607.704 | 3868.7  | 1                                                            | 531.3  | 31.7 | 4 K.SPPSTGSTYGSSQKEESAASGGAAYTK.R    |
| *             | HsFLAG-ARP6_Ti_2  | 2.0039 | 0.3213 | 1140.25 | 1141.18  | 5310.7  | 1                                                            | 576.7  | 68.2 | 1 K.GSFSDTGLGDGK.M                   |
| *             | HsFLAG-FLJ20309_  | 4.0033 | 0.3724 | 1141.41 | 1141.18  | 7367.9  | 1                                                            | 1534.2 | 81.8 | 4 K.GSFSDTGLGDGK.M                   |
| *             | HsFlag-NUFIP_Ti_2 | 4.952  | 0.3403 | 1739.55 | 1739.869 | 9394.7  | 1                                                            | 1617.2 | 69.2 | 2 K.MADFHKEEMDDQDK.D                 |
| *             | HsFLAG-ARP5_Ti_1  | 4.7811 | 0.2721 | 2182.7  | 2182.385 | 9914.9  | 1                                                            | 1207.2 | 38.2 | 2 K.MADFHKEEMDDQDKD.KAK.G            |
| *             | HsFLAG-Lin9_Ti_20 | 2.8062 | 0.3796 | 1488.55 | 1489.714 | 3706.5  | 2                                                            | 282.2  | 50   | 1 K.SGKWEGLVYAPPGK.E                 |
| *             | HsFLAG-UTX1_Ti_2  | 4.6593 | 0.458  | 1490.61 | 1489.714 | 5269.6  | 1                                                            | 1266.4 | 76.9 | 26 K.SGKWEGLVYAPPGK.E                |
| *             | HsFLAG-ARP5_Ti_1  | 4.2377 | 0.3162 | 1746.48 | 1747.004 | 7971.9  | 1                                                            | 1491.6 | 66.7 | 4 K.SGKWEGLVYAPPGKEK.Q               |
| *             | HsFLAG-ARP6_Ti_1  | 4.0262 | 0.3182 | 1217.19 | 1217.41  | 6846.8  | 1                                                            | 1693.7 | 90   | 3 K.WEGLVYAPPGK.E                    |
| *             | HsFLAG-p53-DNA-D  | 3.7508 | 0.3065 | 1474.35 | 1474.7   | 6328.9  | 1                                                            | 968.5  | 75   | 2 K.WEGLVYAPPGKEK.Q                  |
| *             | HsFLAG-ARP6_Ti_2  | 4.4022 | 0.3749 | 1623.27 | 1623.714 | 7996.6  | 1                                                            | 1886.9 | 79.2 | 1 R.KTEELEEEESFPER.S                 |
| *             | HsFLAG-ARP6_Ti_2  | 4.1405 | 0.2839 | 1496.32 | 1495.54  | 8476.2  | 1                                                            | 2117.7 | 86.4 | 3 K.TEELEEEESFPER.S                  |
| *             | HsFLAG-ARP6_Ti_1  | 3.4279 | 0.2473 | 2150.75 | 2151.356 | 4024.7  | 2                                                            | 249.7  | 41.7 | 1 R.MDSFDEDLARPSGLLAQER.K            |
| *             | HsFlag-NUFIP_Ti_1 | 4.4901 | 0.3874 | 2151.5  | 2151.356 | 5492.5  | 1                                                            | 898.4  | 40.3 | 7 R.MDSFDEDLARPSGLLAQER.K            |
| *             | HsFlag-NUFIP_Ti_1 | 2.0818 | 0.1789 | 940.62  | 941.075  | 4483.9  | 1                                                            | 389.5  | 71.4 | 3 R.DLVHSNKK.E                       |
| *             | HsFlag-NUFIP_Ti_1 | 4.4055 | 0.3462 | 1530.38 | 1530.683 | 8327.7  | 1                                                            | 1812.5 | 83.3 | 27 R.SIFQHIQSAQSQR.S                 |
| *             | HsFLAG-ARP6_Ti_1  | 5.6429 | 0.4341 | 2042.61 | 2043.376 | 6735.6  | 1                                                            | 1551.5 | 48.5 | 6 R.SPSELFQAHIVTIVHHVK.E             |
| *             | HsFLAG-Lin9_Ti_20 | 4.9997 | 0.4175 | 2042.79 | 2043.376 | 11587.6 | 1                                                            | 2569.5 | 67.6 | 9 R.SPSELFQAHIVTIVHHVK.E             |
| *             | HsFLAG-p53-DNA-D  | 3.4303 | 0.4267 | 1625.64 | 1625.759 | 7899.2  | 1                                                            | 1056.3 | 69.2 | 3 K.EHHFGSSGMTLHER.F                 |
| *             | HsFLAG-p53-DNA-D  | 3.1038 | 0.1697 | 1192.47 | 1192.36  | 6138.1  | 2                                                            | 839.9  | 77.8 | 3 R.RIDISPSTFR.K                     |
| *             | HsFLAG-p53-DNA-D  | 2.6801 | 0.1451 | 1037.26 | 1038.166 | 5186.9  | 2                                                            | 557.6  | 75   | 4 K.HGLAHDEM.K.S                     |
| *             | HsFLAG-p53-DNA-D  | 3.2209 | 0.2765 | 1038.38 | 1038.166 | 7787    | 7                                                            | 1089   | 81.2 | 4 K.HGLAHDEM.K.S                     |
| *             | HsFLAG-Lin9_Ti_20 | 1.977  | 0.1257 | 1120.52 | 1121.235 | 3512.8  | 9                                                            | 268.6  | 56.2 | 1 K.YKDDPVDLR.L                      |
| *             | HsFLAG-ARP6_Ti_2  | 3.1557 | 0.196  | 1121.32 | 1121.235 | 4141.2  | 1                                                            | 985.6  | 87.5 | 5 K.YKDDPVDLR.L                      |
| *             | HsFLAG-FLJ20309_  | 4.9369 | 0.3666 | 2379.9  | 2381.379 | 10466.6 | 1                                                            | 1334.7 | 55.3 | 8 K.AEEYTEETEEREESTTGFDK.S           |
| *             | HsFLAG-ARP5_Ti_1  | 3.2024 | 0.2366 | 1694.53 | 1693.767 | 4711.8  | 1                                                            | 571.5  | 66.7 | 2 R.NREEEWDPEYTPK.S                  |
| *             | HsFLAG-ARP6_Ti_2  | 2.869  | 0.2573 | 1424.11 | 1423.475 | 4503.7  | 1                                                            | 739.1  | 80   | 3 R.EEEWDPEYTPK.S                    |
| *             | HsFLAG-p53-DNA-D  | 4.0666 | 0.4017 | 1812.32 | 1812.89  | 5931.1  | 1                                                            | 726.5  | 64.3 | 1 K.KYYLHDDREGEESDK.W                |
| *             | HsFLAG-FLJ20309_  | 4.3182 | 0.4121 | 1683.95 | 1684.716 | 10314   | 1                                                            | 1644   | 73.1 | 12 K.YYLHDDREGEESDK.W                |
| *             | HsFLAG-Lin9_Ti_20 | 3.8396 | 0.3902 | 2386.58 | 2387.343 | 8888    | 2                                                            | 621.1  | 40   | 2 K.FSGEEIEEDDESGETENREEK.D          |
| *             | HsFLAG-p53-DNA-D  | 1.9225 | 0.146  | 917.11  | 917.948  | 4635    | 2                                                            | 466.9  | 71.4 | 1 K.DNIQPTTE.-                       |
| gi 4758012 re | 39                | 139    | 34.70% | 1675    | 191613   | 5.7     | clathrin heavy chain 1 [Homo sapiens]                        |        |      |                                      |
| *             | HsFlag-VPS71_Ti_1 | 6.0129 | 0.3073 | 3146.86 | 3147.53  | 6086.6  | 1                                                            | 1614.1 | 38   | 8 R.FQEHLQLQNLGINPANIGFSTLTMESDK.F   |
| *             | HsFLAG-ARP6_Ti_1  | 4.0465 | 0.3157 | 2197.14 | 2196.483 | 9099.1  | 1                                                            | 1135.1 | 50   | 2 K.VGEQAQVVIIDMNDPSNPIR.R           |

|                |                    |        |        |         |          |                                |   |        |      |    |                                   |
|----------------|--------------------|--------|--------|---------|----------|--------------------------------|---|--------|------|----|-----------------------------------|
| *              | HsFLAG-p53-DNA-D   | 4.6307 | 0.3887 | 1559.59 | 1558.793 | 6246.5                         | 1 | 1147.6 | 71.4 | 10 | R.RPISADSAIMNPASK.V               |
| *              | HsFLAG-TCF3_Ti_10  | 3.8461 | 0.3809 | 2336.83 | 2339.802 | 7252.3                         | 1 | 773    | 31.8 | 3  | R.RPISADSAIMNPASKVIALKAGK.T       |
| *              | HsFLAG-ARP6_Ti_1   | 3.9721 | 0.3411 | 1519.22 | 1519.667 | 5599.5                         | 1 | 765.5  | 70.8 | 3  | R.HSSLAGCQIINYR.T                 |
| *              | HsARP6-FLAG_Ti_1   | 3.8184 | 0.3038 | 1501.51 | 1500.741 | 7599.1                         | 1 | 1274.7 | 75   | 2  | K.WLLLTGISAQQNR.V                 |
| *              | HsFLAG-ARP6_Ti_1   | 4.2196 | 0.3316 | 1718.38 | 1717.922 | 6070.9                         | 1 | 1155.3 | 70   | 5  | K.VSQPIEGHAASFAQFK.M              |
| *              | HsFLAG-Lin9_Ti_20  | 4.7809 | 0.3474 | 1945.49 | 1946.257 | 5856.3                         | 1 | 845.1  | 58.8 | 7  | K.LHIIIEVGTPTGNQPPFK.K            |
| *              | HsFLAG-ARP6_Ti_1   | 2.6337 | 0.3343 | 1073.17 | 1072.293 | 4861.8                         | 1 | 639.9  | 81.2 | 1  | K.HDVVFLITK.Y                     |
| *              | HsFLAG-ARP6_Ti_1   | 4.0643 | 0.471  | 2353.55 | 2354.668 | 4790.3                         | 1 | 603.2  | 47.7 | 1  | R.ISGETIFVTAPHEATAGIIGVNR.K       |
| *              | HsARP6-FLAG_Ti_1   | 3.9534 | 0.3105 | 2354.83 | 2354.668 | 6792.3                         | 1 | 870.3  | 33   | 2  | R.ISGETIFVTAPHEATAGIIGVNR.K       |
| *              | HsFLAG-p53-DNA-D   | 5.6841 | 0.3692 | 1759.48 | 1759.959 | 6688.5                         | 1 | 1754.6 | 76.7 | 2  | R.KFNALFAQGNYSEAAK.V              |
| *              | HsFLAG-ARP6_Ti_1   | 5.2277 | 0.3601 | 1633.03 | 1631.785 | 5991.5                         | 1 | 1925.9 | 85.7 | 3  | K.FNALFAQGNYSEAAK.V               |
| *              | HsFlag-NUFIP_Ti_10 | 2.7847 | 0.244  | 3188.36 | 3189.638 | 5705.5                         | 1 | 233.6  | 28.6 | 1  | R.FQSVPAQPGQTSPLLQYFGILLDQGQLNK.Y |
| *              | HsFLAG-Lin9_Ti_20  | 6.4557 | 0.3875 | 3190.03 | 3189.638 | 9891.3                         | 1 | 1249.8 | 31.2 | 4  | R.FQSVPAQPGQTSPLLQYFGILLDQGQLNK.Y |
| *              | HsFLAG-ARP6_Ti_1   | 3.3856 | 0.2625 | 1848.57 | 1849.063 | 5525.3                         | 3 | 311.5  | 50   | 3  | K.YESLELCRPVLQQGR.K               |
| *              | HsFLAG-ARP6_Ti_1   | 3.4464 | 0.3159 | 1609.61 | 1608.924 | 5551.2                         | 1 | 1130.8 | 75   | 2  | K.KVGYTPDWIFLLR.N                 |
| *              | HsFLAG-UTX1_Ti_20  | 3.5603 | 0.3113 | 1481.6  | 1480.75  | 3638.8                         | 1 | 704.1  | 81.8 | 3  | K.VGYTPDWIFLLR.N                  |
| *              | HsFlag-FLJ90652_20 | 3.1672 | 0.3313 | 1368.43 | 1369.48  | 5189.8                         | 1 | 707.6  | 72.7 | 3  | K.NNRPSEGPLQTR.L                  |
| *              | HsFLAG-ARP8_Ti_2   | 4.1739 | 0.3329 | 3133.45 | 3130.625 | 10789.5                        | 1 | 1071.1 | 28.8 | 1  | R.LLEMNLMHAPQVADAILGNQMFTHYDR.A   |
| *              | HsFlag-VPS71_Ti_10 | 3.1346 | 0.3219 | 1069.55 | 1070.2   | 5953.7                         | 1 | 723.3  | 75   | 6  | R.AHIAQLCEK.A                     |
| *              | HsFlag-VPS71_Ti_10 | 2.8183 | 0.1175 | 1070.33 | 1070.2   | 4666.1                         | 5 | 680.9  | 75   | 1  | R.AHIAQLCEK.A                     |
| *              | HsFLAG-ARP6_Ti_1   | 4.0257 | 0.338  | 1466.78 | 1465.646 | 5603.7                         | 1 | 1079.2 | 77.3 | 1  | R.ALEHFTDLYDIK.R                  |
| *              | HsFlag-VPS71_Ti_10 | 3.172  | 0.2431 | 2198.86 | 2200.453 | 8541.2                         | 1 | 684.4  | 50   | 2  | K.YHEQLSTQSLIELFESFK.S            |
| *              | HsFLAG-ARP6_Ti_1   | 3.5927 | 0.2102 | 2043.4  | 2042.344 | 8120.5                         | 1 | 760.4  | 47.2 | 1  | R.LPVVIGLLDVCSEDVIK.N             |
| *              | HsFlag-VPS71_Ti_10 | 4.6244 | 0.3884 | 1777.62 | 1777.898 | 6876.2                         | 1 | 1590.5 | 76.7 | 2  | R.IHEGCEEPATHNALAK.I              |
| *              | HsFlag-DPCD_Ti_20  | 4.5079 | 0.3488 | 2153.68 | 2154.314 | 6109.3                         | 1 | 1025.7 | 61.8 | 5  | R.GQCDLELINVCNENSLFK.S            |
| *              | HsFLAG-ARP6_Ti_1   | 3.6894 | 0.4418 | 1875.81 | 1876.076 | 10010.6                        | 1 | 1600.9 | 63.3 | 3  | K.DPELWGSVLESNPYR.R               |
| *              | HsFLAG-ARP6_Ti_1   | 4.6427 | 0.3389 | 2882.11 | 2883.225 | 9002.2                         | 1 | 1794.5 | 36   | 2  | R.RPLIDQVVQATALSETQDPPEEVSIVTK.A  |
| *              | HsFlag-VPS71_Ti_10 | 4.0616 | 0.248  | 1950.64 | 1948.282 | 3686.6                         | 1 | 775.8  | 68.8 | 11 | K.AFMTADLPNELIELLEK.I             |
| *              | HsFlag-VPS71_Ti_10 | 2.9052 | 0.1604 | 1418.56 | 1416.577 | 7873.4                         | 1 | 1145.6 | 72.7 | 2  | K.IVLDNSVFSEHR.N                  |
| *              | HsFLAG-ARP6_Ti_1   | 4.5161 | 0.2736 | 1354.38 | 1354.676 | 8474.1                         | 1 | 1871   | 86.4 | 13 | R.NLQNLILLITAIK.A                 |
| *              | HsFlag-VPS71_Ti_10 | 6.0626 | 0.3722 | 2370.75 | 2369.683 | 8073.9                         | 1 | 2018.4 | 43.8 | 4  | R.KFDVNTSAVQVLIHIGNLDR.A          |
| *              | HsFLAG-ARP6_Ti_1   | 3.2339 | 0.3312 | 1297.41 | 1297.456 | 6664.8                         | 1 | 1236.2 | 85   | 2  | K.LLYNNVSNFGR.L                   |
| *              | HsFlag-VPS71_Ti_10 | 4.623  | 0.3908 | 1971.79 | 1972.208 | 5677.8                         | 1 | 1368.2 | 63.9 | 7  | R.LASTLVHLGEYQAAVDGAR.K           |
| *              | HsFLAG-ARP6_Ti_1   | 3.5709 | 0.1269 | 3130.67 | 3131.496 | 11146                          | 1 | 949.8  | 28   | 1  | R.LAQMCGLHIVVHADELEELINYYQDR.G    |
| *              | HsFLAG-ARP6_Ti_1   | 4.4561 | 0.4169 | 2355.1  | 2356.551 | 7977.9                         | 1 | 1092.6 | 52.6 | 3  | K.SVNESLNNLFITEEDYQALR.T          |
| *              | HsFLAG-ARP6_Ti_1   | 4.9078 | 0.3743 | 1944.2  | 1944.065 | 8069.4                         | 1 | 2307.6 | 75   | 5  | R.TSIDAYDNFDNISLAQR.L             |
| *              | HsFLAG-UTX1_Ti_20  | 3.8562 | 0.2917 | 2121.7  | 2122.336 | 7707.7                         | 1 | 1353.7 | 59.4 | 2  | K.DTELAEEELLQWFLQEEK.R            |
| gil 5031699 re | 11                 | 30     | 34.70% | 427     | 47355    | 7.5 flotillin 1 [Homo sapiens] |   |        |      |    |                                   |
| *              | HsFLAG-ARP6_Ti_1   | 3.6026 | 0.2262 | 1217.3  | 1216.464 | 8443.2                         | 1 | 1739   | 90   | 2  | R.ISLNTLTLNVK.S                   |
| *              | HsFLAG-ARP6_Ti_1   | 4.1158 | 0.3613 | 1407.62 | 1406.668 | 3312.4                         | 1 | 724.1  | 80.8 | 3  | R.HGVPISVTGIAQVK.I                |
| *              | HsFLAG-ARP6_Ti_1   | 4.9615 | 0.4198 | 2020.72 | 2019.222 | 6004.4                         | 1 | 1275.5 | 47.1 | 5  | K.TEAEIAHIALETLEGHQR.A            |
| *              | HsFLAG-ARP6_Ti_1   | 4.5111 | 0.5334 | 1983.39 | 1984.315 | 7208                           | 1 | 1270   | 58.3 | 9  | K.VASSDLVNMGISVVSYTLK.D           |
| *              | HsFLAG-ARP6_Ti_1   | 4.1036 | 0.3231 | 1470.26 | 1470.625 | 7687                           | 1 | 1934.4 | 83.3 | 1  | R.AQQVAVQEQEIAR.R                 |

|               |                     |        |        |         |          |                                                     |   |        |      |                                |
|---------------|---------------------|--------|--------|---------|----------|-----------------------------------------------------|---|--------|------|--------------------------------|
| *             | HsFLAG-ARP6_Ti_1    | 4.3679 | 0.3464 | 1379.37 | 1379.577 | 6213.1                                              | 1 | 1409.3 | 79.2 | 2 R.MRGEAEFAIGAR.A             |
| *             | HsFLAG-ARP6_Ti_1    | 2.9455 | 0.302  | 2338.89 | 2340.697 | 10816.8                                             | 1 | 566.4  | 39.5 | 1 K.KAEAFQLYQEAAQLDMLLEK.L     |
| *             | HsFLAG-ARP6_Ti_1    | 3.5473 | 0.2547 | 2339.96 | 2340.697 | 10239.8                                             | 1 | 1267.4 | 34.2 | 1 K.KAEAFQLYQEAAQLDMLLEK.L     |
| *             | HsFLAG-ARP6_Ti_1    | 4.6753 | 0.4925 | 1753.91 | 1754.978 | 6879.8                                              | 1 | 1501.7 | 68.8 | 2 K.LPQVAEEISGPLTSANK.I        |
| *             | HsFLAG-ARP6_Ti_1    | 4.0222 | 0.222  | 1216.59 | 1216.42  | 6169.7                                              | 1 | 1645   | 90   | 1 K.VTGEVLDILTR.L              |
| *             | HsFLAG-ARP6_Ti_1    | 3.4345 | 0.2344 | 1283.41 | 1283.47  | 6249.3                                              | 1 | 743.8  | 68.2 | 3 R.LTGVVISQVNHK.P             |
| gi 4885379 re | 17                  | 223    | 34.70% | 219     | 21865    | 11 H1 histone family, member 4 [Homo sapiens]       |   |        |      |                                |
|               | HsFLAG-TCF3_Ti_1    | 3.2643 | 0.3269 | 1326.71 | 1327.564 | 6954.3                                              | 2 | 515.5  | 50   | 5 R.KASGPPVSELITK.A            |
|               | HsFLAG-TCF3_Ti_1    | 4.9006 | 0.3748 | 1327.44 | 1327.564 | 7126.5                                              | 1 | 2047.7 | 87.5 | 16 R.KASGPPVSELITK.A           |
|               | HsFLAG-ARP6_Ti_1    | 4.397  | 0.2266 | 1328.74 | 1327.564 | 4535.9                                              | 1 | 1145.4 | 56.2 | 1 R.KASGPPVSELITK.A            |
|               | HsFlag-NUFIP_Ti_1   | 3.3729 | 0.2564 | 1198.14 | 1199.39  | 5929.5                                              | 1 | 866.6  | 77.3 | 68 K.ASGPPVSELITK.A            |
|               | HsFLAG-FLJ20309_    | 3.0382 | 0.2718 | 1198.52 | 1199.39  | 8477.2                                              | 3 | 646.4  | 59.1 | 6 K.ASGPPVSELITK.A             |
|               | HsFLAG-Lin9_Ti_20   | 3.0617 | 0.1302 | 847.04  | 846.015  | 3664.5                                              | 3 | 944    | 93.8 | 10 R.SGVSLAALK.K               |
|               | HsFLAG-p53-DNA-D    | 3.6663 | 0.1223 | 973.78  | 974.189  | 5265.2                                              | 3 | 1165.6 | 94.4 | 20 R.SGVSLAALKK.A              |
|               | HsFLAG-p53-DNA-D    | 3.6718 | 0.3489 | 1235.52 | 1236.411 | 6430.2                                              | 1 | 1295.6 | 77.3 | 2 K.KALAAAGYDVEK.N             |
|               | HsFLAG-p53-DNA-D    | 4.871  | 0.4075 | 1236.42 | 1236.411 | 8171.8                                              | 1 | 2418   | 90.9 | 3 K.KALAAAGYDVEK.N             |
|               | HsFLAG-p53-DNA-D    | 4.9255 | 0.4111 | 1707.39 | 1707.884 | 8048                                                | 1 | 1885.7 | 70   | 3 K.KALAAAGYDVEKNNSR.I         |
|               | HsFlag-FLJ20643_Ti  | 3.4651 | 0.3974 | 1107.57 | 1108.236 | 9933.9                                              | 1 | 1436.6 | 75   | 24 K.ALAAAGYDVEK.N             |
|               | HsFLAG-ARP6_Ti_2    | 3.7074 | 0.3214 | 1108.09 | 1108.236 | 4889.2                                              | 1 | 1195.4 | 85   | 40 K.ALAAAGYDVEK.N             |
|               | HsFLAG-ARP6_Ti_1    | 4.1777 | 0.3647 | 1579.17 | 1579.71  | 7228.5                                              | 1 | 1615.9 | 75   | 4 K.ALAAAGYDVEKNNSR.I          |
|               | HsVPS71-FLAG_Ti_    | 3.6461 | 0.2615 | 1540.18 | 1539.729 | 5699.1                                              | 1 | 976.7  | 66.7 | 2 K.GTLVQTKGTGASGSFK.L         |
|               | HsFLAG-ARP6_Ti_1    | 3.3753 | 0.2545 | 1167.29 | 1167.307 | 7149.1                                              | 1 | 1246.2 | 77.3 | 2 K.GTGASGSFKLNK.K             |
|               | HsFLAG-p53-DNA-D    | 2.2696 | 0.0973 | 987.61  | 987.144  | 3002.7                                              | 6 | 378.2  | 66.7 | 1 K.KAASGEAKPK.A               |
| *             | HsFLAG-p53-DNA-D    | 3.1523 | 0.0897 | 784.57  | 784.934  | 3943.9                                              | 1 | 678.9  | 81.2 | 16 K.KPAAAAGAK.K               |
| gi 51036603 r | 2                   | 2      | 34.70% | 72      | 8006     | 9 G-protein gamma-12 subunit [Homo sapiens]         |   |        |      |                                |
| *             | HsFLAG-ARP6_Ti_1    | 3.0581 | 0.2012 | 1147.26 | 1147.233 | 7964.1                                              | 2 | 1138.6 | 80   | 1 K.TASTNIAQAR.R               |
| *             | HsFLAG-ARP6_Ti_1    | 2.6231 | 0.1742 | 1640.87 | 1640.731 | 4447.1                                              | 4 | 407.8  | 53.8 | 1 K.ASADLMSYCEEHAR.S           |
| gi 4506661 re | 12                  | 64     | 34.60% | 266     | 29996    | 10.6 ribosomal protein L7a [Homo sapiens]           |   |        |      |                                |
|               | HsFLAG-TCF3_Ti_1    | 2.3847 | 0.2042 | 979.61  | 980.239  | 5836.4                                              | 1 | 651.2  | 66.7 | 3 K.KVAPAPAVVK.K               |
|               | HsFLAG-ARP6_Ti_1    | 2.7499 | 0.2699 | 980.34  | 980.239  | 3621.3                                              | 1 | 694.6  | 83.3 | 3 K.KVAPAPAVVK.K               |
|               | HsFLAG-p53-DNA-D    | 2.4982 | 0.2511 | 851.54  | 852.065  | 3578.9                                              | 1 | 460.9  | 68.8 | 11 K.VAPAPAVVK.K               |
|               | HsFlag-les6_293_Ti_ | 1.9708 | 0.1172 | 945.5   | 946.134  | 4193.3                                              | 9 | 486    | 78.6 | 1 K.VVNPLFEK.R                 |
|               | HsFlag-les6_293_Ti_ | 3.5635 | 0.2422 | 1217.12 | 1217.367 | 4843.6                                              | 1 | 1149.1 | 85   | 4 K.NFGIGQDIQPK.R              |
|               | HsFLAG-TCF3_Ti_1    | 2.7097 | 0.2127 | 1569.68 | 1570.789 | 5391.8                                              | 3 | 303.7  | 46.2 | 2 K.VPPAINQFTQALDR.Q           |
|               | HsFLAG-UTX1_Ti_2    | 3.9383 | 0.3688 | 1571.6  | 1570.789 | 5595.3                                              | 1 | 1298.2 | 80.8 | 23 K.VPPAINQFTQALDR.Q          |
|               | HsFLAG-TCF3_Ti_1    | 4.1887 | 0.2465 | 1346.52 | 1346.524 | 6235.8                                              | 1 | 848.1  | 70.8 | 7 R.AGVNTVTTLVENK.K            |
|               | HsFLAG-ARP6_Ti_1    | 3.7392 | 0.1839 | 1475.6  | 1474.698 | 5372.9                                              | 1 | 786.3  | 69.2 | 4 R.AGVNTVTTLVENKK.A           |
| *             | HsFLAG-TCF3_Ti_1    | 4.416  | 0.2206 | 2689.01 | 2689.18  | 6101.8                                              | 1 | 762.3  | 45.7 | 2 K.AQLVVIAHDVDPIELVVFLPALCR.K |
|               | HsFLAG-ARP6_Ti_1    | 2.8566 | 0.3316 | 1221.4  | 1221.407 | 4864                                                | 1 | 627.1  | 80   | 2 R.RHWGGNVLGPK.S              |
|               | HsFLAG-TCF3_Ti_1    | 3.0447 | 0.2716 | 1064.47 | 1065.22  | 5436.9                                              | 1 | 717.3  | 77.8 | 2 R.HWGGNVLGPK.S               |
| gi 14916501 r | 4                   | 27     | 34.60% | 130     | 15069    | 10.9 ribosomal protein S24 isoform a [Homo sapiens] |   |        |      |                                |
| gi 4506703 re | 4                   | 27     | 33.80% | 133     | 15423    | 10.8 ribosomal protein S24 isoform c [Homo sapiens] |   |        |      |                                |
|               | HsFLAG-ARP6_Ti_1    | 3.5025 | 0.312  | 1238.07 | 1237.503 | 5411                                                | 8 | 666.3  | 80   | 2 K.QMVIDVLHPGK.A              |

|               |                     |        |        |         |          |                                                                  |   |        |      |    |                                   |
|---------------|---------------------|--------|--------|---------|----------|------------------------------------------------------------------|---|--------|------|----|-----------------------------------|
|               | HsFLAG-TCF3_Ti_10   | 3.6934 | 0.3935 | 1399.62 | 1399.632 | 4657.3                                                           | 1 | 870.2  | 81.8 | 22 | K.TTPDVIVFVGFGR.T                 |
|               | HsFLAG-TIP49b_Ti_10 | 1.8817 | 0.121  | 703.23  | 703.776  | 3961.3                                                           | 2 | 438.3  | 83.3 | 1  | R.THFGGGK.T                       |
|               | HsFLAG-TCF3_Ti_10   | 3.0533 | 0.3235 | 1683.35 | 1682.885 | 6028                                                             | 1 | 575.6  | 53.6 | 2  | K.TTGFGMIYDSL DYAK.K              |
| gi 4758302 re | 6                   | 75     | 34.60% | 104     | 12259    | 5.9 enhancer of rudimentary homolog [Homo sapiens]               |   |        |      |    |                                   |
| *             | HsFLAG-ARP6_Ti_2    | 6.1107 | 0.5545 | 2056.2  | 2056.137 | 5563.5                                                           | 1 | 1562.8 | 78.1 | 41 | R.TYADYESVNECMEGVCK.M             |
| *             | HsFLAG-ARP6_Ti_1    | 2.6939 | 0.172  | 950.11  | 950.097  | 3741.3                                                           | 7 | 609.9  | 91.7 | 2  | K.MYEEHLK.R                       |
| *             | HsFLAG-ARP5_Ti_1    | 1.8455 | 0.098  | 1105.47 | 1106.285 | 5346.2                                                           | 4 | 400.8  | 64.3 | 1  | K.MYEEHLK.R.M                     |
| *             | HsFLAG-ARP5_Ti_1    | 2.8906 | 0.1695 | 1107.12 | 1106.285 | 6682.9                                                           | 6 | 706.9  | 78.6 | 3  | K.MYEEHLK.R.M                     |
| *             | HsFLAG-p53-DNA-D    | 2.4415 | 0.252  | 1328.46 | 1329.409 | 5649.9                                                           | 1 | 517.8  | 65   | 8  | R.ADTQTYQPYNK.D                   |
| *             | HsFLAG-ARP6_Ti_2    | 3.7224 | 0.2571 | 1329.43 | 1329.409 | 5641.8                                                           | 1 | 1007.9 | 80   | 20 | R.ADTQTYQPYNK.D                   |
| gi 4507645 re | 6                   | 10     | 34.50% | 249     | 26669    | 6.9 triosephosphate isomerase 1 [Homo sapiens]                   |   |        |      |    |                                   |
| *             | HsFLAG-p53-DNA-D    | 4.6427 | 0.3131 | 1543.38 | 1543.804 | 8726.8                                                           | 1 | 2389   | 82.1 | 1  | R.KQSLGELIGTLNAAK.V               |
| *             | HsH2AZ-FLAG_293_    | 3.8349 | 0.3863 | 1415.41 | 1415.63  | 5688.4                                                           | 1 | 1740.9 | 92.3 | 1  | K.QSLGELIGTLNAAK.V                |
| *             | HsH2AZ-FLAG_293_    | 4.3017 | 0.3778 | 2192.54 | 2193.427 | 3917.3                                                           | 1 | 375.9  | 44.7 | 5  | K.VPADTEVVCAPPTAYIDFAR.Q          |
|               | HsFLAG-RPB5MP_2     | 2.7392 | 0.2182 | 1137.84 | 1138.275 | 5705.1                                                           | 1 | 1105.3 | 88.9 | 1  | K.IAVAAQNCYK.V                    |
|               | HsFLAG-RPB5MP_2     | 4.1735 | 0.364  | 1235.4  | 1235.296 | 6808.1                                                           | 1 | 1590.9 | 86.4 | 1  | K.SNVSDAVAQSTR.I                  |
| *             | HsFLAG-Lin9_Ti_20   | 3.8439 | 0.2589 | 3031.8  | 3031.433 | 2685.8                                                           | 1 | 269.7  | 27.7 | 1  | K.ELASQPDVDGFLVGGASLKPEFVDIINAK.Q |
| gi 39930523 r | 8                   | 42     | 34.40% | 381     | 41037    | 5 hypothetical protein LOC144097 [Homo sapiens]                  |   |        |      |    |                                   |
| *             | HsFLAG-FLJ20729_    | 4.2551 | 0.3534 | 2121.49 | 2122.262 | 4886.2                                                           | 1 | 671.8  | 38.2 | 1  | K.TPPPRPSPLEAGSDGCEEPK.Q          |
| *             | HsFlag-NUFIP_Ti_10  | 2.7395 | 0.1665 | 2121.56 | 2122.262 | 7431.5                                                           | 4 | 370    | 36.8 | 1  | K.TPPPRPSPLEAGSDGCEEPK.Q          |
| *             | HsFLAG-FLJ20729_    | 4.4819 | 0.4088 | 2069.61 | 2069.282 | 7014.5                                                           | 1 | 990.9  | 58.8 | 2  | R.SHILEQHPHTLDLSPSEK.S            |
| *             | HsFlag-FLJ90652_2   | 4.9139 | 0.3511 | 2001.89 | 2001.247 | 7970.9                                                           | 1 | 2501.9 | 73.5 | 16 | K.SNILEAWSEGVALLDQDVR.A           |
| *             | HsFlag-DPCD_Ti_20   | 3.1036 | 0.3114 | 2068.34 | 2068.39  | 4566.3                                                           | 2 | 288.4  | 44.4 | 1  | R.MPAEIVLLDSEDNPSLPK.R            |
| *             | HsFlag-NUFIP_Ti_10  | 4.1901 | 0.4337 | 1859.52 | 1860.164 | 6226.3                                                           | 1 | 867.6  | 58.8 | 18 | R.GLRPLELPAVPATEPGNK.K            |
| *             | HsFlag-FLJ90652_2   | 2.9046 | 0.1253 | 1198.65 | 1199.309 | 4557.8                                                           | 2 | 799.1  | 80   | 1  | K.DREVAEGGLPR.A                   |
| *             | HsFLAG-Lin9_Ti_20   | 4.0942 | 0.3086 | 2776.35 | 2777.017 | 8117.2                                                           | 1 | 977.1  | 31.7 | 2  | K.RVGAGDTSDWPTVLSSESSTTVAGKPEK.G  |
| gi 4503841 re | 16                  | 75     | 34.20% | 609     | 69843    | 6.6 ATP-dependent DNA helicase II, 70 kDa subunit [Homo sapiens] |   |        |      |    |                                   |
| *             | HsFLAG-ARP6_Ti_1    | 5.5653 | 0.4578 | 2501.19 | 2502.428 | 8914.1                                                           | 1 | 1465.5 | 54.8 | 3  | K.TEGDEEAEEEEQEENLEASGDYK.Y       |
| *             | HsFLAG-p53-DNA-D    | 3.5972 | 0.39   | 2027.62 | 2027.325 | 9525.6                                                           | 1 | 978.9  | 52.9 | 1  | K.IISSDRDLLAVFYGTEK.D             |
| *             | HsFlag-VPS71_Ti_10  | 5.7104 | 0.2506 | 1574.74 | 1574.774 | 8744.4                                                           | 1 | 2593.5 | 80.8 | 9  | K.NIYVLQELDNPGAK.R                |
| *             | HsFLAG-ARP6_Ti_1    | 3.1173 | 0.1768 | 1162.52 | 1162.374 | 4531.5                                                           | 1 | 822.9  | 87.5 | 2  | K.RILELDQFK.G                     |
|               | HsFlag-VPS71_Ti_10  | 4.2385 | 0.3186 | 1405.63 | 1403.679 | 5011.9                                                           | 1 | 1302.6 | 86.4 | 3  | R.DTGIFDLMLHLK.K                  |
| *             | HsFlag-VPS71_Ti_10  | 3.8727 | 0.2843 | 1653.67 | 1652.842 | 5532.2                                                           | 1 | 805.1  | 63.3 | 3  | R.TFNTSTGGLLLPSDTK.R              |
| *             | HsFLAG-p53-DNA-D    | 3.4677 | 0.4079 | 1808.84 | 1809.029 | 5546                                                             | 1 | 588.2  | 53.1 | 2  | R.TFNTSTGGLLLPSDTKR.S             |
|               | HsFLAG-p53-DNA-D    | 2.8285 | 0.3096 | 2035.26 | 2035.554 | 4898.7                                                           | 2 | 342.9  | 44.1 | 1  | R.FDDPGLMLMGFKPLVLLK.K            |
| *             | HsFlag-VPS71_Ti_10  | 4.0793 | 0.3511 | 2501.7  | 2501.798 | 4448.9                                                           | 1 | 580.6  | 52.5 | 3  | R.RNIPPYFVALVPQEEELDDQK.I         |
|               | HsARP6-FLAG_Ti_1    | 4.4795 | 0.4061 | 2132.56 | 2133.495 | 4576.3                                                           | 1 | 1127.4 | 66.7 | 32 | K.IQVTPPGFQLVFLPFADDK.R           |
|               | HsFLAG-p53-DNA-D    | 3.0905 | 0.2592 | 2288.17 | 2289.682 | 5492.4                                                           | 1 | 441.5  | 47.4 | 1  | K.IQVTPPGFQLVFLPFADDKR.K          |
|               | HsFLAG-p53-DNA-D    | 4.001  | 0.3032 | 1704.26 | 1704.839 | 5518.5                                                           | 1 | 826.3  | 65.4 | 6  | R.SDSFENPVLQQHFR.N                |
|               | HsFLAG-FLJ20729_    | 4.2945 | 0.2217 | 2423.84 | 2424.812 | 9501.5                                                           | 8 | 1365.2 | 34.5 | 1  | R.NLEALALDLMEPEQAVDLTLPK.V        |
|               | HsFLAG-p53-DNA-D    | 5.1543 | 0.2645 | 2424.95 | 2424.812 | 7109.7                                                           | 1 | 923.4  | 50   | 4  | R.NLEALALDLMEPEQAVDLTLPK.V        |
|               | HsFLAG-Lin9_Ti_20   | 3.311  | 0.2879 | 1215.51 | 1215.268 | 6838.7                                                           | 5 | 756    | 70   | 2  | K.RKHDNEGSGSK.R                   |
|               | HsFLAG-p53-DNA-D    | 3.1948 | 0.1408 | 1173.21 | 1173.395 | 6459.7                                                           | 1 | 1000   | 83.3 | 2  | K.KELLEALTK.H                     |

|                     |        |        |         |          |         |                                                                                                            |
|---------------------|--------|--------|---------|----------|---------|------------------------------------------------------------------------------------------------------------|
| gi 5729850 re       | 7      | 24     | 34.20%  | 354      | 40532   | 5.7 guanine nucleotide binding protein (G protein), alpha inhibiting activity polypeptide 3 [Homo sapiens] |
| * HsFLAG-ARP6_Ti_1  | 3.6666 | 0.3103 | 1789.45 | 1790.156 | 10750.8 | 1 1446.4 63.3 4 K.VVVSNTIQSIIAIR.A                                                                         |
| * HsFLAG-ARP6_Ti_1  | 4.9672 | 0.4619 | 2079.36 | 2080.172 | 8248    | 1 1889.6 71.9 2 R.EYQLNDSASYLNDLDR.I                                                                       |
| * HsFLAG-ARP6_Ti_1  | 4.0968 | 0.3085 | 1762.53 | 1762.96  | 4858    | 1 653.7 67.9 1 R.ISQSNYIPTQQDVL.R.T                                                                        |
| HsFLAG-ARP6_Ti_1    | 3.3505 | 0.2431 | 1381.35 | 1381.571 | 5505.5  | 1 661.5 68.2 5 K.TTGIVETHFTFK.D                                                                            |
| * HsFLAG-ARP6_Ti_1  | 5.5585 | 0.4319 | 3959.82 | 3962.207 | 10219   | 1 1164.1 25.8 4 K.RSPLTICYPEYTGSNYEEAAAYIQCFEDLNR.R                                                        |
| HsFLAG-ARP6_Ti_1    | 3.3771 | 0.3264 | 1587.44 | 1587.692 | 7621.9  | 1 909.3 66.7 2 K.EIYTHFTCATDTK.N                                                                           |
| HsFLAG-ARP6_Ti_1    | 3.2254 | 0.2473 | 1708.53 | 1708.995 | 6149.4  | 1 791.4 57.1 6 K.NVQFVFDVAVTDVVIK.N                                                                        |
| gi 35493987 r       | 4      | 6      | 34.20%  | 158      | 18007   | 8.7 ubiquitin-conjugating enzyme E2I [Homo sapiens]                                                        |
| gi 4507785 re       | 4      | 6      | 34.20%  | 158      | 18007   | 8.7 ubiquitin-conjugating enzyme E2I [Homo sapiens]                                                        |
| gi 35494003 r       | 4      | 6      | 34.20%  | 158      | 18007   | 8.7 ubiquitin-conjugating enzyme E2I [Homo sapiens]                                                        |
| gi 35493996 r       | 4      | 6      | 34.20%  | 158      | 18007   | 8.7 ubiquitin-conjugating enzyme E2I [Homo sapiens]                                                        |
| HsFlag-VPS71_Ti_1   | 2.3337 | 0.3761 | 1314.71 | 1315.514 | 4386.8  | 1 553.5 63.6 1 K.DHPFGFVAVPTK.N                                                                            |
| HsFlag-NUFIP_Ti_2   | 3.5102 | 0.4287 | 1315.33 | 1315.514 | 3968.1  | 1 682 77.3 3 K.DHPFGFVAVPTK.N                                                                              |
| HsFlag-VPS71_Ti_1   | 3.1085 | 0.2654 | 1219.86 | 1220.414 | 5939.4  | 1 701.5 70 1 K.KGTPWEGGLFK.L                                                                               |
| HsFLAG-Lin9_Ti_20   | 4.9069 | 0.3505 | 3619.64 | 3618.004 | 10218.2 | 1 1312.4 27.5 1 K.QILLGIQELLNEPNIQDPAQAEAYTIYQQR.V                                                         |
| gi 22094079 r       | 4      | 11     | 34.20%  | 155      | 17607   | 5.7 thyroid hormone receptor interactor 3 isoform 2 [Homo sapiens]                                         |
| HsFlag-NUFIP_Ti_2   | 3.9584 | 0.3587 | 1468.07 | 1468.629 | 6231.5  | 1 1611.2 86.4 2 K.CSTVVCICLEK.P                                                                            |
| HsFlag-NUFIP_Ti_2   | 3.7965 | 0.3509 | 1692.91 | 1693.92  | 7042.4  | 1 986.5 65.4 6 K.CSTVVCICLEKPK.Y                                                                           |
| * HsFlag-NUFIP_Ti_2 | 3.522  | 0.2038 | 1392.22 | 1390.551 | 7112.5  | 7 787.1 72.7 2 R.QLMVNLDQGEDK.A                                                                            |
| * HsFlag-NUFIP_Ti_2 | 3.9156 | 0.3149 | 3163.51 | 3164.396 | 7779.8  | 1 742.7 26.9 1 R.AYMQEPLFVEFADCCLGIVEPSQNEES.-                                                             |
| gi 11067747 r       | 20     | 60     | 33.80%  | 802      | 92251   | 8.2 CDC5-like [Homo sapiens]                                                                               |
| * HsFLAG-p53-DNA-D  | 4.3883 | 0.3674 | 1838.77 | 1839.021 | 9042.2  | 1 1461.2 64.3 6 R.TAAQCLEHYEFLLDK.A                                                                        |
| * HsFlag-NUFIP_Ti_2 | 3.6626 | 0.3656 | 1566.56 | 1566.795 | 5214.7  | 1 657.8 65.4 1 R.KLKPGEIDPNPETK.P                                                                          |
| * HsFlag-NUFIP_Ti_2 | 2.8622 | 0.2283 | 1439.32 | 1438.621 | 5219.1  | 1 595.8 66.7 2 K.LKPGEIDPNPETK.P                                                                           |
| * HsFlag-NUFIP_Ti_2 | 4.5344 | 0.3841 | 2429.27 | 2430.664 | 7774.3  | 1 1773.8 41.2 2 K.PARPDIDMDEDELEMLSEAR.A                                                                   |
| * HsFlag-NUFIP_Ti_2 | 3.5245 | 0.2431 | 1539.27 | 1538.7   | 4632.2  | 1 741 70.8 2 K.RGVDYNAEIPFEK.K                                                                             |
| * HsFlag-NUFIP_Ti_2 | 4.4685 | 0.2935 | 2551.43 | 2551.728 | 9529.3  | 1 1734 38.1 3 K.KPALGFYDTSEENYQALDADFR.K                                                                   |
| * HsFlag-NUFIP_Ti_2 | 5.4652 | 0.4271 | 2678.54 | 2679.902 | 12032.8 | 1 2125 37.5 4 K.KPALGFYDTSEENYQALDADFRK.L                                                                  |
| * HsFlag-NUFIP_Ti_2 | 3.4635 | 0.0886 | 1344.64 | 1343.483 | 5800.2  | 2 1053.6 80 2 K.LRQQDLGELR.S                                                                               |
| * HsFLAG-FLJ20729_  | 4.9053 | 0.297  | 2010.58 | 2010.205 | 7851.7  | 1 1008.5 55.6 6 K.ESDLPAILQTSVSEFTK.K                                                                      |
| * HsFlag-NUFIP_Ti_2 | 3.0095 | 0.3714 | 1948.6  | 1950.283 | 4229.8  | 1 416.5 55.9 5 K.LVLPAPQISDAELQEVVK.V                                                                      |
| * HsFlag-NUFIP_Ti_2 | 4.9823 | 0.4879 | 2011.64 | 2013.174 | 10170.1 | 1 1500.8 55.6 5 K.GGLNTPHESDFSGVTPQR.Q                                                                     |
| * HsFlag-NUFIP_Ti_2 | 3.8832 | 0.2296 | 2013.02 | 2013.174 | 7417.9  | 1 1153 38.9 2 K.GGLNTPHESDFSGVTPQR.Q                                                                       |
| * HsFLAG-Lin9_Ti_20 | 3.9056 | 0.4258 | 1688.27 | 1687.936 | 7166.8  | 1 833.7 60.7 2 R.QVVQTPNTVLSTPFR.T                                                                         |
| * HsFlag-NUFIP_Ti_2 | 2.6341 | 0.2901 | 1514.5  | 1512.706 | 4588.5  | 1 456.6 57.1 1 R.SGTTPKPVINSTPGR.T                                                                         |
| * HsFlag-NUFIP_Ti_2 | 3.4292 | 0.2114 | 979.22  | 979.251  | 3491.5  | 1 984.4 94.4 4 R.LGLLGLPAPK.N                                                                              |
| * HsFlag-NUFIP_Ti_2 | 2.0341 | 0.19   | 979.45  | 979.251  | 7638.4  | 7 531.3 61.1 1 R.LGLLGLPAPK.N                                                                              |
| * HsFlag-NUFIP_Ti_2 | 4.1838 | 0.4065 | 1811.41 | 1811.854 | 7509.4  | 1 1678.2 70 4 R.EIDDTYIEDAADVDAR.K                                                                         |
| * HsFLAG-p53-DNA-D  | 4.5493 | 0.2936 | 3086.16 | 3085.528 | 7464.2  | 1 938.2 31.7 3 K.DLPRPSEVNETILRPLNVEPPLTDLQK.S                                                             |
| * HsFlag-NUFIP_Ti_2 | 3.5962 | 0.2423 | 2553.91 | 2551.731 | 4974.7  | 2 480.8 31 1 K.TVGFGTNNSEHITYLEHNPYEK.F                                                                    |
| * HsFlag-NUFIP_Ti_2 | 4.4249 | 0.2672 | 1489.51 | 1488.739 | 8060.7  | 1 1729.2 79.2 4 K.AQDVLVQEMEVVK.Q                                                                          |
| gi 17986258 r       | 5      | 27     | 33.80%  | 151      | 16930   | 4.7 smooth muscle and non-muscle myosin alkali light chain isoform 1 [Homo sapiens]                        |



|                    |        |        |         |          |         |      |                                                                                 |
|--------------------|--------|--------|---------|----------|---------|------|---------------------------------------------------------------------------------|
| gi 17986264 r      | 5      | 27     | 32.50%  | 157      | 17557   | 4.6  | smooth muscle and non-muscle myosin alkali light chain isoform 3 [Homo sapiens] |
| gi 17986262 r      | 5      | 27     | 44.00%  | 116      | 12939   | 4.9  | smooth muscle and non-muscle myosin alkali light chain isoform 4 [Homo sapiens] |
| gi 17986260 r      | 5      | 27     | 44.00%  | 116      | 12970   | 4.7  | smooth muscle and non-muscle myosin alkali light chain isoform 2 [Homo sapiens] |
| HsFLAG-ARP6_Ti_1   | 3.778  | 0.2425 | 1355.69 | 1355.534 | 5029.6  | 1    | 804.1 75 3 R.ALGQNPTNAEVLK.V                                                    |
| HsFlag-VPS71_Ti_1  | 4.9027 | 0.3715 | 1889.66 | 1889.263 | 4533.5  | 1    | 946.2 63.3 7 K.VLDFEHFLPMLQTVAK.N                                               |
| HsFLAG-ARP6_Ti_1   | 4.198  | 0.4159 | 1545.82 | 1545.602 | 8109.8  | 1    | 2061.7 87.5 6 K.DQGTYEDYVEGLR.V                                                 |
| HsFlag-VPS71_Ti_1  | 2.9399 | 0.2406 | 995.55  | 996.195  | 4331.1  | 2    | 733.6 75 7 R.HVLVTLGEK.M                                                        |
| HsFLAG-Lin9_Ti_20  | 3.6874 | 0.262  | 995.98  | 996.195  | 3256.9  | 2    | 778.9 93.8 4 R.HVLVTLGEK.M                                                      |
| gi 50659095 r      | 24     | 102    | 33.70%  | 783      | 87344   | 9.3  | DEAD (Asp-Glu-Ala-Asp) box polypeptide 21 [Homo sapiens]                        |
| HsFLAG-FLJ20729_   | 3.9818 | 0.3468 | 1650.83 | 1651.764 | 7728.2  | 1    | 1620.5 80.8 1 K.TEEIAEEEEVFVK.A                                                 |
| HsFLAG-ARP5_Ti_1   | 2.6904 | 0.338  | 1560.09 | 1560.763 | 6691.4  | 1    | 576.1 57.7 1 K.KKAEPSEVDMNSPK.S                                                 |
| HsFlag-VPS71_Ti_1  | 2.692  | 0.2745 | 1432.49 | 1432.588 | 5566.3  | 1    | 781.3 70.8 1 K.KAEPSEVDMNSPK.S                                                  |
| HsFLAG-p53-DNA-D   | 4.2709 | 0.1579 | 1500.42 | 1500.649 | 7373.7  | 2    | 984.4 70.8 1 K.KKEEPSQNDISPK.T                                                  |
| HsFLAG-Lin9_Ti_20  | 4.0318 | 0.2285 | 1712.76 | 1712.808 | 6160.6  | 1    | 1656.4 78.6 5 K.NEEPSEEEIDAPKPK.K                                               |
| HsFLAG-FLJ20729_   | 3.5926 | 0.2982 | 1670.26 | 1669.828 | 4527.4  | 1    | 895.6 71.4 9 K.EGAFSNFPISEETIK.L                                                |
| HsFLAG-p53-DNA-D   | 3.6244 | 0.3108 | 1221.39 | 1221.485 | 4852.7  | 1    | 738.9 75 2 R.GVTFLFPIQAK.T                                                      |
| HsFLAG-Lin9_Ti_20  | 2.6023 | 0.305  | 1075.45 | 1076.2   | 7475.5  | 2    | 524.5 62.5 2 K.TFHHVYSGK.D                                                      |
| HsFLAG-Lin9_Ti_20  | 3.506  | 0.2472 | 1266.31 | 1266.523 | 5194.1  | 1    | 1086 85 7 K.TFSFAIPLIEK.L                                                       |
| HsFLAG-Lin9_Ti_20  | 4.2433 | 0.3646 | 1378.3  | 1378.661 | 9261.5  | 1    | 1102.4 66.7 1 R.GRAPQVLVLPATR.E                                                 |
| HsFlag-VPS71_Ti_1  | 2.7815 | 0.3071 | 1164.7  | 1165.421 | 4717.6  | 1    | 312.2 65 1 R.APQVLVLPATR.E                                                      |
| HsFlag-DPCD_Ti_20  | 4.0825 | 0.2708 | 1164.9  | 1165.421 | 7089.6  | 1    | 1318.8 80 9 R.APQVLVLPATR.E                                                     |
| HsFLAG-Lin9_Ti_20  | 5.3263 | 0.4541 | 2137.62 | 2138.353 | 7366.6  | 1    | 1399.4 63.9 4 K.KLSVACFYGGTPYGGQFER.M                                           |
| HsFLAG-FLJ20729_   | 3.6936 | 0.4019 | 2009.24 | 2010.179 | 7120.5  | 1    | 803.9 52.9 8 K.LSVACFYGGTPYGGQFER.M                                             |
| HsFLAG-Lin9_Ti_20  | 2.5579 | 0.1996 | 1212.13 | 1212.392 | 8600.2  | 7    | 674.6 63.6 1 R.NGIDILVGTGPR.I                                                   |
| HsFLAG-FLJ20729_   | 3.3099 | 0.2993 | 1382.01 | 1382.56  | 8223.3  | 1    | 915.5 72.7 2 K.DHIQNGKLDLTK.L                                                   |
| HsFLAG-Lin9_Ti_20  | 4.1908 | 0.3902 | 2777.79 | 2778.016 | 8574.2  | 1    | 1418.3 50 1 K.DSEDNPQTLIFSATCPHWVFNVAK.K                                        |
| HsFlag-DPCD_Ti_20  | 4.7327 | 0.3394 | 2778.16 | 2778.016 | 5453.4  | 1    | 861.4 33.7 4 K.DSEDNPQTLIFSATCPHWVFNVAK.K                                       |
| HsFLAG-Lin9_Ti_20  | 3.0287 | 0.2957 | 1381.33 | 1381.569 | 9765.6  | 1    | 1331 72.7 1 K.STYEQVDLIGKK.T                                                    |
| HsFLAG-UTX1_Ti_2   | 3.4931 | 0.2986 | 1526.09 | 1525.788 | 2825.1  | 1    | 403.9 73.1 6 R.LLDSVPPTAISHFK.Q                                                 |
| HsFlag-DPCD_Ti_20  | 6.4566 | 0.3938 | 2108.9  | 2109.347 | 8765.1  | 1    | 3420.7 50 9 K.GAVEALAAALAHISGATSVQDR.S                                          |
| HsFlag-VPS71_Ti_1  | 5.972  | 0.5571 | 2109.73 | 2109.347 | 6683.1  | 1    | 2034 66.7 12 K.GAVEALAAALAHISGATSVQDR.S                                         |
| HsFLAG-Lin9_Ti_20  | 4.2981 | 0.4114 | 1993.63 | 1994.215 | 4005.5  | 1    | 541.9 52.9 9 K.LGVCFDVPTASVTEIQEK.W                                             |
| HsFLAG-Lin9_Ti_20  | 4.3601 | 0.3125 | 1840.34 | 1841.031 | 8663.8  | 1    | 1240.7 63.3 5 R.WQLSVATEQPELEGPR.E                                              |
| gi 46195723 r      | 14     | 87     | 33.70%  | 490      | 54774   | 10.1 | ribosomal L1 domain containing 1 [Homo sapiens]                                 |
| HsFLAG-TCF3_Ti_1   | 2.4946 | 0.1389 | 1127.59 | 1128.28  | 6240.8  | 2    | 512.8 66.7 3 K.AVDALLTHCK.S                                                     |
| HsFLAG-ARP6_Ti_1   | 3.5376 | 0.2457 | 1128.34 | 1128.28  | 7215.7  | 2    | 1180.4 83.3 7 K.AVDALLTHCK.S                                                    |
| HsFLAG-ARP6_Ti_1   | 3.679  | 0.2924 | 1330.47 | 1331.596 | 6972.7  | 1    | 1343.9 86.4 2 K.TVSQIISLQTLK.K                                                  |
| HsFlag-NUFIP_Ti_1  | 4.6571 | 0.4098 | 1532.46 | 1532.736 | 7892.2  | 1    | 1356 75 4 R.LLSSFDFFLTDAR.I                                                     |
| HsFLAG-ARP6_Ti_1   | 3.4369 | 0.1629 | 1025.81 | 1025.283 | 7147.6  | 3    | 1048.2 87.5 7 R.RLLPSLIGR.H                                                     |
| HsFlag-NUFIP_Ti_1  | 2.509  | 0.2563 | 1184.47 | 1184.465 | 2699.6  | 3    | 431.3 80 1 K.KVPVSVNLLSK.N                                                      |
| HsFLAG-ARP6_Ti_1   | 2.9022 | 0.2612 | 1056.26 | 1056.291 | 4374.2  | 2    | 747.5 77.8 1 K.VPVSVNLLSK.N                                                     |
| HsFlag-NUFIP_Ti_1  | 4.0686 | 0.3697 | 1634.23 | 1633.805 | 6198.1  | 1    | 1004.3 71.4 3 R.EINDCIGGTVLNISK.S                                               |
| HsFlag-NUFIP_Ti_11 | 5.2563 | 0.4521 | 2203.17 | 2202.62  | 11681.3 | 1    | 1270.3 52.6 25 R.IGHVGMQIEHIENIVAVTK.G                                          |

|                |                      |        |        |         |          |        |                                                       |        |      |    |                                    |
|----------------|----------------------|--------|--------|---------|----------|--------|-------------------------------------------------------|--------|------|----|------------------------------------|
| *              | HsFLAG-ARP6_Ti_1     | 2.6893 | 0.106  | 1116.3  | 1116.302 | 6802.5 | 3                                                     | 848.9  | 81.2 | 2  | K.LPEKWESVK.L                      |
| *              | HsFlag-NUFIP_Ti_1C   | 5.3313 | 0.4546 | 2072.49 | 2071.294 | 7441.4 | 1                                                     | 1533.9 | 63.9 | 23 | K.SAALPIFSSFVSNWDEATK.R            |
| *              | HsFLAG-ARP6_Ti_1     | 4.9976 | 0.3445 | 2021.16 | 2021.186 | 6400.4 | 1                                                     | 966.7  | 55.3 | 4  | K.TASVLSKDDVAPESGDTTVK.K           |
| *              | HsFlag-NUFIP_Ti_1C   | 3.3754 | 0.3558 | 1840.55 | 1841.025 | 4591.8 | 1                                                     | 581.1  | 53.1 | 4  | K.ATNESEDEIPLVPIGK.K               |
| *              | HsFLAG-p53-DNA-D     | 1.8942 | 0.1051 | 1041.32 | 1042.221 | 3117.3 | 2                                                     | 184.2  | 61.1 | 1  | R.KALPASETPK.A                     |
| gij 16753227 r | 11                   | 65     | 33.70% | 288     | 32728    | 10.6   | ribosomal protein L6 [Homo sapiens]                   |        |      |    |                                    |
| gij 67189747 r | 11                   | 65     | 33.70% | 288     | 32728    | 10.6   | ribosomal protein L6 [Homo sapiens]                   |        |      |    |                                    |
|                | HsFLAG-ARP6_Ti_1     | 3.2765 | 0.3518 | 1284.41 | 1285.527 | 5043.8 | 1                                                     | 541.4  | 62.5 | 6  | K.VLATVTKPVGGD.K.N                 |
|                | HsMRGBP-FLAG_Ti_1    | 3.5938 | 0.2853 | 1285.55 | 1285.527 | 5390.4 | 1                                                     | 667    | 66.7 | 19 | K.VLATVTKPVGGD.K.N                 |
|                | HsFLAG-ARP6_Ti_1     | 4.249  | 0.44   | 1526.92 | 1526.86  | 4827   | 1                                                     | 651.2  | 64.3 | 10 | R.ASITPGTILILTLGR.H                |
|                | HsFLAG-TCF3_Ti_1C    | 5.21   | 0.4479 | 1765.84 | 1765.15  | 7982.2 | 1                                                     | 1285.9 | 65.6 | 7  | K.QLASGLLLVTGPLVLR.N.R             |
|                | HsFLAG-TCF3_Ti_1C    | 1.9579 | 0.1203 | 866.54  | 867.033  | 6606.4 | 1                                                     | 673    | 78.6 | 2  | K.FVIATSTK.I                       |
|                | HsFLAG-TCF3_Ti_1C    | 2.0581 | 0.2744 | 994.37  | 995.123  | 4964.4 | 1                                                     | 452.5  | 71.4 | 1  | K.HLTDAYFK.K                       |
|                | HsFLAG-TCF3_Ti_1C    | 3.1567 | 0.291  | 995.35  | 995.123  | 5083.4 | 1                                                     | 970.1  | 92.9 | 4  | K.HLTDAYFK.K                       |
|                | HsFlag-les6_293_Ti_1 | 3.1622 | 0.352  | 1333.56 | 1333.397 | 6713.5 | 1                                                     | 1139   | 80   | 1  | R.HQEGEIFDTEK.E                    |
|                | HsFLAG-ARP6_Ti_1     | 3.0241 | 0.0922 | 1196.4  | 1196.302 | 5949.6 | 1                                                     | 845.8  | 81.2 | 3  | K.EKYEITEQR.K                      |
|                | HsFLAG-ARP6_Ti_1     | 4.1922 | 0.381  | 1448.91 | 1447.677 | 8202.7 | 1                                                     | 1294.9 | 75   | 11 | R.SVFALTNGIYPHK.L                  |
|                | HsFLAG-TCF3_Ti_1C    | 2.6685 | 0.1755 | 1806.39 | 1807.145 | 8782.8 | 7                                                     | 368.3  | 43.3 | 1  | R.SVFALTNGIYPHKLVF.-               |
| gij 7661958 re | 31                   | 219    | 33.60% | 920     | 106122   | 10     | BCL2-associated transcription factor 1 [Homo sapiens] |        |      |    |                                    |
|                | HsFLAG-Lin9_Ti_20C   | 4.2612 | 0.3994 | 2608.33 | 2609.676 | 5946.2 | 1                                                     | 803    | 50   | 1  | K.SQEEPKDTFEHDPSESIDEFNK.S         |
|                | HsFLAG-FLJ20309_1    | 4.4768 | 0.3065 | 2609.29 | 2609.676 | 5563.1 | 1                                                     | 1164.5 | 40.5 | 3  | K.SQEEPKDTFEHDPSESIDEFNK.S         |
|                | HsFLAG-Lin9_Ti_20C   | 3.3212 | 0.393  | 1909.47 | 1910.945 | 5751.3 | 1                                                     | 598.7  | 60   | 1  | K.DTFEHPSESIDEFNK.S                |
|                | HsFLAG-ARP6_Ti_1     | 5.1513 | 0.412  | 2081.01 | 2082.191 | 4345.3 | 1                                                     | 1197.2 | 65.8 | 14 | K.SSATSGDIWPGLSAYDNSPR.S           |
|                | HsFLAG-ARP6_Ti_1     | 5.7567 | 0.5084 | 3149.59 | 3150.41  | 5943.5 | 1                                                     | 989.4  | 33.3 | 5  | R.SPHSPSPATPPSQSSSCSDAPMLSTVHSAK.N |
|                | HsFLAG-Lin9_Ti_20C   | 3.2888 | 0.3921 | 1841.82 | 1842.925 | 8446.2 | 1                                                     | 920.3  | 60   | 1  | K.NTPSQHSHSIQHSRPER.S              |
|                | HsFLAG-ARP6_Ti_1     | 2.5523 | 0.1984 | 967.27  | 968.101  | 4600.9 | 6                                                     | 828.2  | 87.5 | 1  | K.TIAPQNAPR.D                      |
|                | HsH2AZ-FLAG_293_Ti_1 | 2.8249 | 0.2658 | 1502.15 | 1502.534 | 2926   | 1                                                     | 542.6  | 73.1 | 2  | R.SSFYDPGGDQETAK.T                 |
|                | HsFLAG-Lin9_Ti_20C   | 5.2958 | 0.3655 | 2246.57 | 2246.308 | 7267   | 1                                                     | 1898.4 | 69.4 | 4  | K.GRAEGEWEDQEALDYFSDK.E            |
|                | HsFLAG-Lin9_Ti_20C   | 5.0374 | 0.3337 | 2032.96 | 2033.069 | 9320.5 | 1                                                     | 2207.5 | 71.9 | 1  | R.AEGEWEDQEALDYFSDK.E              |
|                | HsFLAG-FLJ20309_1    | 5.5489 | 0.5305 | 1922.24 | 1922.824 | 6865.1 | 1                                                     | 1753.4 | 73.3 | 20 | K.FNDSEGGDTEETEDYR.Q               |
| *              | HsFLAG-p53-DNA-D     | 4.7777 | 0.3353 | 1708.24 | 1708.952 | 9846.3 | 1                                                     | 1611.4 | 64.3 | 3  | K.LKETGYVVERPSTTK.D                |
|                | HsARP6-FLAG_Ti_1     | 4.0025 | 0.399  | 1467.31 | 1467.619 | 6423.2 | 1                                                     | 915.3  | 75   | 17 | K.ETGYVVERPSTTK.D                  |
|                | HsFLAG-p53-DNA-D     | 4.3204 | 0.369  | 1573.66 | 1573.832 | 9737   | 1                                                     | 1775.8 | 75   | 1  | K.LKDLFDYSPPLHK.N                  |
|                | HsFLAG-Lin9_Ti_20C   | 3.5931 | 0.26   | 1332.32 | 1332.499 | 7653.8 | 1                                                     | 1005.4 | 70   | 12 | K.DLFDYSPPLHK.N                    |
|                | HsFlag-DPCD_Ti_20    | 3.8989 | 0.261  | 1370.22 | 1370.566 | 8028.2 | 1                                                     | 1481.2 | 81.8 | 15 | K.MIASDSHRPEVK.L                   |
|                | HsFLAG-ARP6_Ti_1     | 4.047  | 0.3734 | 1812.47 | 1813.079 | 5550.3 | 2                                                     | 533.8  | 56.2 | 24 | K.MAPVPLDDSNRPASLTK.D              |
|                | HsARP6-FLAG_Ti_1     | 3.247  | 0.2366 | 1439.34 | 1439.698 | 6648.9 | 1                                                     | 1365.4 | 83.3 | 9  | K.DRLLASTLVHVK.K                   |
|                | HsFlag-NUFIP_Ti_11   | 4.0313 | 0.1564 | 1439.98 | 1439.698 | 6001.1 | 1                                                     | 1627.3 | 58.3 | 4  | K.DRLLASTLVHVK.K                   |
|                | HsFLAG-UTX1_Ti_20    | 2.5908 | 0.1827 | 1169.61 | 1168.422 | 4573.5 | 8                                                     | 374.5  | 60   | 8  | R.LLASTLVHVK.K                     |
|                | HsFLAG-FLJ20309_1    | 3.8371 | 0.2884 | 1169.73 | 1168.422 | 6485.1 | 1                                                     | 1340.1 | 85   | 32 | R.LLASTLVHVK.K                     |
|                | HsFLAG-Lin9_Ti_20C   | 3.9334 | 0.3292 | 1296.14 | 1296.596 | 8716.5 | 1                                                     | 1516.9 | 77.3 | 2  | R.LLASTLVHVK.K                     |
|                | HsFLAG-p53-DNA-D     | 3.9366 | 0.2838 | 1484.42 | 1484.739 | 9225.3 | 1                                                     | 1148.9 | 66.7 | 4  | R.SIFDHIKLPQASK.S                  |
|                | HsFLAG-FLJ20729_1    | 4.3567 | 0.3409 | 2048.13 | 2049.337 | 9388   | 1                                                     | 952.6  | 50   | 5  | K.STSESIQIHIVSLVHHVK.E             |

|                |                    |        |        |         |          |         |   |        |      |                                                                            |
|----------------|--------------------|--------|--------|---------|----------|---------|---|--------|------|----------------------------------------------------------------------------|
|                | HsFLAG-BC014022_   | 4.3344 | 0.463  | 2049.27 | 2049.337 | 4916.2  | 1 | 977.5  | 45.6 | 6 K.STSESIQIHIVSLVHHVK.E                                                   |
| *              | HsFLAG-ARP6_Ti_2   | 2.9345 | 0.2083 | 993.29  | 993.123  | 5521    | 1 | 1044.5 | 87.5 | 2 K.SAAMTLNER.F                                                            |
| *              | HsFLAG-p53-DNA-D   | 3.4994 | 0.3769 | 1804.69 | 1804.954 | 4238.6  | 1 | 580.4  | 65.4 | 2 K.RPKEEEWDPEYTPK.S                                                       |
|                | HsFLAG-ARP6_Ti_2   | 2.869  | 0.2573 | 1424.11 | 1423.475 | 4503.7  | 1 | 739.1  | 80   | 3 K.EEEWDPEYTPK.S                                                          |
| *              | HsFLAG-p53-DNA-D   | 3.0895 | 0.1037 | 2143.73 | 2144.307 | 9303.3  | 1 | 622.9  | 46.9 | 1 K.KYFLHDDRDDGVDYWAK.R                                                    |
| *              | HsFLAG-ARP5_Ti_1   | 4.3283 | 0.3842 | 2015.29 | 2016.133 | 7258.6  | 1 | 935.9  | 60   | 7 K.YFLHDDRDDGVDYWAK.R                                                     |
|                | HsFLAG-ARP6_Ti_2   | 4.9742 | 0.2722 | 2358.56 | 2359.391 | 6939.8  | 1 | 1704.2 | 63.2 | 9 K.YQGDGIVEDEETMENNEEK.K                                                  |
| gij 21614544 r |                    | 3      | 4      | 33.30%  | 93       | 10834   |   |        |      | 7 S100 calcium-binding protein A8 [Homo sapiens]                           |
| *              | HsFLAG-RPB5MP_2    | 3.7614 | 0.3114 | 1272.9  | 1273.475 | 5506.7  | 1 | 933.7  | 80   | 1 K.ALNSIIDVYHK.Y                                                          |
| *              | HsFLAG-RPB5MP_2    | 2.7361 | 0.3326 | 964.12  | 964.071  | 5188.2  | 1 | 810.7  | 85.7 | 1 K.GNFHAVYR.D                                                             |
| *              | HsFLAG-RPB5MP_2    | 2.833  | 0.2527 | 1550.55 | 1550.761 | 7247.9  | 1 | 859    | 68.2 | 2 K.KLLETCPQYIR.K                                                          |
| gij 4758086 re |                    | 4      | 11     | 33.20%  | 193      | 20567   |   |        |      | 8.6 cysteine and glycine-rich protein 1 [Homo sapiens]                     |
| *              | HsSrcap_Ti_204.209 | 4.5908 | 0.4102 | 2045.37 | 2046.166 | 9583.2  | 1 | 855.3  | 53.1 | 4 K.TVYFAEEVQCEGNSFHK.S                                                    |
| *              | HsSrcap_Ti_201.076 | 4.1274 | 0.4051 | 1475.4  | 1475.555 | 7512.8  | 1 | 1273.7 | 71.4 | 2 K.GYGYGQGAGTLSTDK.G                                                      |
| *              | HsSrcap_Ti_206.185 | 4.06   | 0.4164 | 1843.46 | 1843.954 | 6886.4  | 1 | 964.4  | 62.5 | 2 K.HEEAPGHRPTTNPASK.F                                                     |
| *              | HsSrcap_Ti_202.230 | 4.1239 | 0.4268 | 1434.81 | 1434.551 | 7278.6  | 1 | 1123.4 | 67.9 | 3 K.GFGFGQGAGALVHSE.-                                                      |
| gij 4758504 re |                    | 4      | 9      | 33.00%  | 261      | 26923   |   |        |      | 7.8 hydroxyacyl-Coenzyme A dehydrogenase, type II isoform 1 [Homo sapiens] |
| *              | HsFLAG-ARP6_Ti_1   | 5.338  | 0.3935 | 2195.53 | 2196.466 | 6254.5  | 1 | 1038.9 | 52.3 | 2 R.LVGGASAVLLDLPNSGGEAQAK.K                                               |
| *              | HsFLAG-ARP6_Ti_1   | 3.8679 | 0.4339 | 1850.06 | 1851.033 | 6723.4  | 1 | 956.4  | 59.4 | 1 K.KLGNVCVFAPADVTSEK.D                                                    |
| *              | HsFlag-NUFIP_Ti_1C | 4.4187 | 0.326  | 2086.32 | 2086.538 | 5214.2  | 1 | 1017.4 | 60.5 | 3 R.VMTIAPGLFGTPLLSTLPEK.V                                                 |
| *              | HsSrcap_Ti_203.509 | 4.4184 | 0.284  | 2880.06 | 2880.273 | 9363.5  | 1 | 1087.4 | 30   | 3 R.LGDPAEYAHLVQAIINPFLNGEVIR.L                                            |
| gij 4506645 re |                    | 3      | 10     | 32.90%  | 70       | 8218    |   |        |      | 10.1 ribosomal protein L38 [Homo sapiens]                                  |
| *              | HsFLAG-p53-DNA-D   | 4.9994 | 0.2956 | 1576.43 | 1576.877 | 7888.6  | 1 | 2031.2 | 87.5 | 6 R.KIEEIKDFLLTAR.R                                                        |
| *              | HsFLAG-ARP6_Ti_1   | 2.6435 | 0.1236 | 1228.54 | 1229.459 | 9020.1  | 4 | 874.2  | 72.2 | 2 R.YLYTLVITDK.E                                                           |
| *              | HsFLAG-ARP6_Ti_1   | 2.7021 | 0.2023 | 1229.62 | 1229.459 | 5439.9  | 1 | 956.9  | 88.9 | 2 R.YLYTLVITDK.E                                                           |
| gij 51988900 r |                    | 32     | 77     | 32.80%  | 1186     | 133307  |   |        |      | 5.3 XPG-complementing protein [Homo sapiens]                               |
| *              | HsSrcap_Ti_205.501 | 5.0755 | 0.4137 | 1698.43 | 1698.059 | 7149.2  | 1 | 1650.1 | 75   | 1 K.ILAVDISIWLNQALK.G                                                      |
| *              | HsSrcap_Ti_205.336 | 4.854  | 0.2223 | 1702.04 | 1702.05  | 8021.1  | 1 | 1935.9 | 51.8 | 2 R.IRPIFVFDGDAPLLK.K                                                      |
| *              | HsSrcap_Ti_205.335 | 4.1484 | 0.3665 | 1702.41 | 1702.05  | 5658    | 1 | 986.8  | 67.9 | 2 R.IRPIFVFDGDAPLLK.K                                                      |
| *              | HsSrcap_Ti_203.178 | 3.528  | 0.1723 | 1385.81 | 1385.563 | 8025.9  | 1 | 1657.1 | 81.8 | 2 K.RDEALPSLTQVR.R                                                         |
| *              | HsSrcap_Ti_206.219 | 2.8224 | 0.1909 | 1522.6  | 1523.691 | 5027.2  | 1 | 559.3  | 63.6 | 1 K.NYLNQHIEHVQK.E                                                         |
| *              | HsSrcap_Ti_206.219 | 4.5852 | 0.2618 | 1523.4  | 1523.691 | 10614.2 | 1 | 2244.6 | 86.4 | 2 K.NYLNQHIEHVQK.E                                                         |
| *              | HsSrcap_Ti_205.111 | 1.9443 | 0.0911 | 1336.48 | 1337.456 | 4261    | 1 | 246    | 60   | 1 K.EMNQQHSGHIR.R                                                          |
| *              | HsSrcap_Ti_206.187 | 2.9119 | 0.2798 | 1337.63 | 1337.456 | 6516.3  | 1 | 610.9  | 70   | 2 K.EMNQQHSGHIR.R                                                          |
| *              | HsSrcap_Ti_204.185 | 3.4399 | 0.1765 | 1660.73 | 1660.911 | 5781.8  | 2 | 776.7  | 73.1 | 2 R.RVSEDTSYILIK.G                                                         |
| *              | HsScrap_Ti_103.198 | 2.6077 | 0.2878 | 1505.32 | 1504.723 | 7779.8  | 1 | 1060.2 | 70.8 | 1 R.VVSEDTSYILIK.G                                                         |
| *              | HsScrap_Ti_102.164 | 2.6283 | 0.3362 | 1535.32 | 1536.633 | 5385.9  | 1 | 515.5  | 50   | 2 K.TVAEVDSESLPSSSK.M                                                      |
| *              | HsSrcap_Ti_201.075 | 4.634  | 0.4634 | 1535.95 | 1536.633 | 6865    | 1 | 1854.7 | 78.6 | 4 K.TVAEVDSESLPSSSK.M                                                      |
| *              | HsSrcap_Ti_203.229 | 4.4889 | 0.3637 | 3586.77 | 3587.836 | 8356    | 1 | 851.3  | 23.5 | 3 K.GIPFATLASSSVNSAEHVASTNEGPREPTDSVPK.E                                   |
| *              | HsSrcap_Ti_202.285 | 3.9336 | 0.4246 | 2450.63 | 2449.796 | 7388.9  | 1 | 1660.9 | 59.5 | 2 K.EQMSLVHVGTAEAFPISESMIK.D                                               |
| *              | HsSrcap_Ti_203.185 | 2.8078 | 0.2477 | 1257.21 | 1255.46  | 4446.1  | 1 | 668.2  | 80   | 3 K.DRLPLESAVVR.H                                                          |
| *              | HsSrcap_Ti_201.068 | 2.695  | 0.3356 | 1592.34 | 1592.709 | 5280    | 1 | 432.1  | 53.6 | 1 R.ELTPASPTCTNSVSK.N                                                      |
| *              | HsScrap_Ti_103.184 | 6.3401 | 0.3616 | 2418.46 | 2419.53  | 7712.9  | 1 | 1905.5 | 60.5 | 1 K.NETHAEVLEQQNELCPYESK.F                                                 |

|             |                    |        |        |         |          |         |   |        |      |                                                                                                  |
|-------------|--------------------|--------|--------|---------|----------|---------|---|--------|------|--------------------------------------------------------------------------------------------------|
| *           | HsSrcap_Ti_203.399 | 4.2855 | 0.3139 | 4291.17 | 4290.691 | 4633    | 5 | 240.6  | 18.1 | 3 K.E                                                                                            |
| *           | HsSrcap_Ti_203.302 | 5.0154 | 0.3346 | 3087.02 | 3087.324 | 10024.4 | 1 | 738.1  | 34.6 | 8 K.EHENFLETIQEQQTTESAGQDLISIPK.A                                                                |
| *           | HsSrcap_Ti_205.322 | 5.0728 | 0.3881 | 3088.31 | 3087.324 | 7549.1  | 1 | 833.2  | 29.8 | 4 K.EHENFLETIQEQQTTESAGQDLISIPK.A                                                                |
| *           | HsSrcap_Ti_203.489 | 5.3697 | 0.3105 | 3726.22 | 3726.987 | 11860.3 | 1 | 1964.2 | 29   | 7 K.DAEDSLHEWQDINLEELETLESNLLAQNSLK.A                                                            |
| *           | HsSrcap_Ti_205.307 | 3.8708 | 0.3025 | 2307.44 | 2307.527 | 7917    | 1 | 661.6  | 47.1 | 2 K.FVEYYQYVDFHNQLGLDR.N                                                                         |
| *           | HsSrcap_Ti_203.191 | 2.6616 | 0.2705 | 1347.45 | 1348.46  | 6106.5  | 1 | 595.6  | 61.1 | 2 K.FSEWWHEAQK.N                                                                                 |
| *           | HsScrap_Ti_104.199 | 3.5547 | 0.3452 | 1350.03 | 1348.46  | 6078.1  | 1 | 1172.7 | 83.3 | 4 K.FSEWWHEAQK.N                                                                                 |
| *           | HsScrap_Ti_103.324 | 3.1104 | 0.2006 | 2034.15 | 2031.359 | 2987.5  | 1 | 302.4  | 50   | 3 R.TLQLTPGFNPVAVAEAYLK.P                                                                        |
| *           | HsSrcap_Ti_203.351 | 3.63   | 0.3927 | 2771.95 | 2772.171 | 5955.4  | 1 | 579.6  | 42   | 2 R.TLQLTPGFNPVAVAEAYLKPVVDDSK.G                                                                 |
| *           | HsSrcap_Ti_203.206 | 3.1445 | 0.269  | 1362.61 | 1363.556 | 5520.7  | 1 | 733.8  | 63.6 | 2 K.GSFLWGWKPDLDK.I                                                                              |
| *           | HsSrcap_Ti_203.206 | 3.5695 | 0.2764 | 1365.76 | 1363.556 | 6529.8  | 1 | 1030.4 | 72.7 | 1 K.GSFLWGWKPDLDK.I                                                                              |
| *           | HsSrcap_Ti_203.212 | 2.3592 | 0.1509 | 1377.56 | 1378.609 | 6111.1  | 1 | 630.9  | 63.6 | 2 R.TKTDES LFPVLK.Q                                                                              |
| *           | HsSrcap_Ti_203.212 | 4.1781 | 0.246  | 1378.74 | 1378.609 | 5293.7  | 2 | 900    | 77.3 | 2 R.TKTDES LFPVLK.Q                                                                              |
| *           | HsScrap_Ti_102.252 | 3.2398 | 0.2371 | 1149.45 | 1149.329 | 4730.6  | 1 | 1070.7 | 88.9 | 2 K.TDES LFPVLK.Q                                                                                |
| *           | HsSrcap_Ti_204.173 | 4.2061 | 0.21   | 1535.74 | 1535.695 | 8506.7  | 1 | 1410   | 73.1 | 1 K.RGITNTLEESSLK.R                                                                              |
| gi 24234747 | r                  | 11     | 71     | 32.80%  | 390      | 43062   |   |        |      | 5.3 interleukin enhancer binding factor 2 [Homo sapiens]                                         |
| *           | HsSrcap_Ti_203.204 | 3.401  | 0.312  | 1733.41 | 1732.971 | 5313.5  | 1 | 577.7  | 56.7 | 18 R.VKPAPDETSFSEALLK.R                                                                          |
| *           | HsFLAG-Lin9_Ti_20  | 4.9447 | 0.4125 | 2255.8  | 2256.521 | 8971.3  | 1 | 1110.2 | 52.5 | 8 K.RNQDLAPNSAEQASILSLVTK.I                                                                      |
| *           | HsFLAG-FLJ20729_   | 5.4671 | 0.3197 | 2256.77 | 2256.521 | 7395.8  | 1 | 1481.2 | 38.8 | 12 K.RNQDLAPNSAEQASILSLVTK.I                                                                     |
| *           | HsFLAG-p53-DNA-D   | 4.9873 | 0.4681 | 2099.68 | 2100.334 | 4043    | 1 | 1131.3 | 71.1 | 2 R.NQDLAPNSAEQASILSLVTK.I                                                                       |
| *           | HsFLAG-Lin9_Ti_20  | 4.2003 | 0.2955 | 2582.66 | 2583.944 | 5840.5  | 2 | 433.2  | 40.9 | 12 K.INNVIDNLIVAPGTFEVQIEEVR.Q                                                                   |
| *           | HsFLAG-FLJ20729_   | 4.8721 | 0.2522 | 2584.59 | 2583.944 | 8350.2  | 1 | 1044.5 | 33   | 1 K.INNVIDNLIVAPGTFEVQIEEVR.Q                                                                    |
| *           | HsFLAG-p53-DNA-D   | 4.0925 | 0.3377 | 1770.56 | 1770.097 | 10386   | 1 | 1259.9 | 53.1 | 1 K.GTMTTGHNVADLVVILK.I                                                                          |
| *           | HsFLAG-p53-DNA-D   | 2.9953 | 0.2848 | 1409.59 | 1410.697 | 7051.4  | 1 | 691.3  | 57.7 | 3 K.ILPTLEAVAALGNK.V                                                                             |
| *           | HsFLAG-p53-DNA-D   | 5.0407 | 0.4288 | 1410.96 | 1410.697 | 5405.1  | 1 | 1489.5 | 88.5 | 12 K.ILPTLEAVAALGNK.V                                                                            |
| *           | HsFlag-DPCD_Ti_20  | 5.0165 | 0.3671 | 2872.88 | 2872.127 | 9554.5  | 1 | 1519.9 | 44.2 | 1 R.AQDPSEVLTMLTNETGFIESSSDATVK.I                                                                |
| *           | HsFLAG-p53-DNA-D   | 3.7443 | 0.1131 | 1043.33 | 1042.267 | 7597.7  | 1 | 2071.4 | 94.4 | 1 K.VLQSALAAIR.H                                                                                 |
| gi 4506743  | re                 | 7      | 38     | 32.70%  | 208      | 24205   |   |        |      | 10.3 ribosomal protein S8 [Homo sapiens]                                                         |
| *           | HsFlag-NUFIP_Ti_11 | 4.0752 | 0.2553 | 1348.14 | 1348.545 | 7376.4  | 1 | 1326.9 | 81.8 | 4 R.KYELGRPAANTK.I                                                                               |
| *           | HsFLAG-ARP6_Ti_1   | 3.2535 | 0.2702 | 1220.75 | 1220.371 | 9259.3  | 1 | 1421.1 | 80   | 4 K.YELGRPAANTK.I                                                                                |
| *           | HsFLAG-ARP6_Ti_1   | 4.4531 | 0.4105 | 1789.4  | 1788.843 | 6827.3  | 1 | 894.1  | 60.7 | 2 R.LDVGNFSWGSECCTR.K                                                                            |
| *           | HsFlag-NUFIP_Ti_10 | 3.8149 | 0.3165 | 1719.65 | 1719.935 | 8511    | 1 | 1480.9 | 67.9 | 5 R.IIDVVYNASNELVR.T                                                                             |
| *           | HsFLAG-ARP6_Ti_1   | 3.3778 | 0.3114 | 1620.41 | 1620.808 | 3975    | 1 | 412.4  | 66.7 | 13 R.QWYESHYALPLGR.K                                                                             |
| *           | HsFLAG-TCF3_Ti_10  | 3.2944 | 0.3427 | 1506.33 | 1507.684 | 5370.6  | 1 | 697.2  | 70.8 | 2 K.ISSLLEEQQQGGK.L                                                                              |
| *           | HsFLAG-ARP8_Ti_2   | 4.7193 | 0.3769 | 1507.23 | 1507.684 | 7946.1  | 1 | 1818.7 | 79.2 | 8 K.ISSLLEEQQQGGK.L                                                                              |
| gi 89061489 | r                  | 26     | 205    | 32.60%  | 869      | 100139  |   |        |      | 9.9 PREDICTED: similar to Bcl-2-associated transcription factor 1 (Btf) isoform 1 [Homo sapiens] |
| *           | HsFLAG-Lin9_Ti_20  | 4.2612 | 0.3994 | 2608.33 | 2609.676 | 5946.2  | 1 | 803    | 50   | 1 K.SQEEPKDTFEHDPSESIDFNK.S                                                                      |
| *           | HsFLAG-FLJ20309_   | 4.4768 | 0.3065 | 2609.29 | 2609.676 | 5563.1  | 1 | 1164.5 | 40.5 | 3 K.SQEEPKDTFEHDPSESIDFNK.S                                                                      |
| *           | HsFLAG-Lin9_Ti_20  | 3.3212 | 0.393  | 1909.47 | 1910.945 | 5751.3  | 1 | 598.7  | 60   | 1 K.DTFEHDPSSEIDFNK.S                                                                            |
| *           | HsFLAG-ARP6_Ti_1   | 5.1513 | 0.412  | 2081.01 | 2082.191 | 4345.3  | 1 | 1197.2 | 65.8 | 14 K.SSATSGDIWPGLSAYDNSPR.S                                                                      |
| *           | HsFLAG-ARP6_Ti_1   | 5.7567 | 0.5084 | 3149.59 | 3150.41  | 5943.5  | 1 | 989.4  | 33.3 | 5 R.SPHSPPIATPPSQSSSCSDAPMLSTVHSAK.N                                                             |
| *           | HsFLAG-Lin9_Ti_20  | 3.2888 | 0.3921 | 1841.82 | 1842.925 | 8446.2  | 1 | 920.3  | 60   | 1 K.NTPSQHSHSIQHSPER.S                                                                           |
| *           | HsFLAG-ARP6_Ti_1   | 2.5523 | 0.1984 | 967.27  | 968.101  | 4600.9  | 6 | 828.2  | 87.5 | 1 K.TIAPQNAPR.D                                                                                  |

|                |                    |        |        |         |          |        |                                                                                 |        |      |                              |
|----------------|--------------------|--------|--------|---------|----------|--------|---------------------------------------------------------------------------------|--------|------|------------------------------|
|                | HsH2AZ-FLAG_293_   | 2.8249 | 0.2658 | 1502.15 | 1502.534 | 2926   | 1                                                                               | 542.6  | 73.1 | 2 R.SSFYPDGGDQETAK.T         |
|                | HsFLAG-Lin9_Ti_20  | 5.2958 | 0.3655 | 2246.57 | 2246.308 | 7267   | 1                                                                               | 1898.4 | 69.4 | 4 K.GRAEGEWEDQEALDYFSDK.E    |
|                | HsFLAG-Lin9_Ti_20  | 5.0374 | 0.3337 | 2032.96 | 2033.069 | 9320.5 | 1                                                                               | 2207.5 | 71.9 | 1 R.AEGEWEDQEALDYFSDK.E      |
|                | HsFLAG-FLJ20309_   | 5.5489 | 0.5305 | 1922.24 | 1922.824 | 6865.1 | 1                                                                               | 1753.4 | 73.3 | 20 K.FNDSEGGDTEETEDYR.Q      |
|                | HsARP6-FLAG_Ti_1   | 4.0025 | 0.399  | 1467.31 | 1467.619 | 6423.2 | 1                                                                               | 915.3  | 75   | 17 K.ETGYVVERPSTTK.D         |
|                | HsFLAG-p53-DNA-D   | 4.3204 | 0.369  | 1573.66 | 1573.832 | 9737   | 1                                                                               | 1775.8 | 75   | 1 K.LKDLFDYSPPLHK.N          |
|                | HsFLAG-Lin9_Ti_20  | 3.5931 | 0.26   | 1332.32 | 1332.499 | 7653.8 | 1                                                                               | 1005.4 | 70   | 12 K.DLFDYSPPLHK.N           |
|                | HsFlag-DPCD_Ti_20  | 3.8989 | 0.261  | 1370.22 | 1370.566 | 8028.2 | 1                                                                               | 1481.2 | 81.8 | 15 K.MIASDSHRPEVK.L          |
|                | HsFLAG-ARP6_Ti_1   | 4.047  | 0.3734 | 1812.47 | 1813.079 | 5550.3 | 2                                                                               | 533.8  | 56.2 | 24 K.MAPVPLDSDNRPASLTK.D     |
|                | HsARP6-FLAG_Ti_1   | 3.247  | 0.2366 | 1439.34 | 1439.698 | 6648.9 | 1                                                                               | 1365.4 | 83.3 | 9 K.DRLLASTLVHSV.K           |
|                | HsFlag-NUFIP_Ti_11 | 4.0313 | 0.1564 | 1439.98 | 1439.698 | 6001.1 | 1                                                                               | 1627.3 | 58.3 | 4 K.DRLLASTLVHSV.K           |
|                | HsFLAG-UTX1_Ti_2   | 2.5908 | 0.1827 | 1169.61 | 1168.422 | 4573.5 | 8                                                                               | 374.5  | 60   | 8 R.LLASTLVHSV.K             |
|                | HsFLAG-FLJ20309_   | 3.8371 | 0.2884 | 1169.73 | 1168.422 | 6485.1 | 1                                                                               | 1340.1 | 85   | 32 R.LLASTLVHSV.K            |
|                | HsFLAG-Lin9_Ti_20  | 3.9334 | 0.3292 | 1296.14 | 1296.596 | 8716.5 | 1                                                                               | 1516.9 | 77.3 | 2 R.LLASTLVHSV.K             |
|                | HsFLAG-p53-DNA-D   | 3.9366 | 0.2838 | 1484.42 | 1484.739 | 9225.3 | 1                                                                               | 1148.9 | 66.7 | 4 R.SIFDHIKLPQASK.S          |
|                | HsFLAG-FLJ20729_   | 4.3567 | 0.3409 | 2048.13 | 2049.337 | 9388   | 1                                                                               | 952.6  | 50   | 5 K.STSEFIQHIVSLVHHVK.E      |
|                | HsFLAG-BC014022_   | 4.3344 | 0.463  | 2049.27 | 2049.337 | 4916.2 | 1                                                                               | 977.5  | 45.6 | 6 K.STSEFIQHIVSLVHHVK.E      |
|                | HsFLAG-ARP5_Ti_1   | 3.8223 | 0.3908 | 1897.48 | 1897.955 | 7861.5 | 1                                                                               | 982.7  | 60   | 4 R.GTFHDDRDDGVYWAK.R        |
|                | HsFLAG-ARP6_Ti_2   | 4.9742 | 0.2722 | 2358.56 | 2359.391 | 6939.8 | 1                                                                               | 1704.2 | 63.2 | 9 K.YQGDGIVEDEETMENNEEK.K    |
| gij 51460917 r | 2                  | 19     | 32.50% | 114     | 11577    | 4.7    | PREDICTED: similar to 60S acidic ribosomal protein P1 isoform 1 [Homo sapiens]  |        |      |                              |
| gij 88957953 r | 2                  | 19     | 32.50% | 114     | 11577    | 4.7    | PREDICTED: similar to 60S acidic ribosomal protein P1 isoform 3 [Homo sapiens]  |        |      |                              |
|                | HsFLAG-TCF3_Ti_1   | 3.2965 | 0.227  | 2404.75 | 2406.658 | 6988.5 | 1                                                                               | 700.3  | 50   | 1 K.LACIYSALILHDDEVTVTEDK.I  |
|                | HsFLAG-ARP6_Ti_1   | 3.9266 | 0.2884 | 1705.72 | 1703.981 | 4430.2 | 1                                                                               | 618.8  | 60   | 18 K.AAGVNVPEFPWPLFAK.A      |
| gij 21361489 r | 18                 | 96     | 32.40% | 763     | 86267    | 8.6    | enhancer of polycomb homolog 2 [Homo sapiens]                                   |        |      |                              |
| *              | HsTIP60_Ti_103.166 | 3.0184 | 0.2018 | 1020.21 | 1020.177 | 4967   | 1                                                                               | 845.3  | 87.5 | 1 R.AISAQQVFR.E              |
| *              | HsFLAG-TIP49b_Ti_  | 4.5642 | 0.3824 | 2341.01 | 2340.613 | 4564.1 | 1                                                                               | 792.1  | 60.5 | 6 K.KESMVIPVPEAESNVNYYNR.L   |
| *              | HsTIP60_Ti_104.238 | 3.658  | 0.2894 | 2212.2  | 2212.439 | 3563.4 | 1                                                                               | 439.6  | 55.6 | 4 K.ESMVIPVPEAESNVNYYNR.L    |
| *              | HsH2AZ-FLAG_293_   | 4.0291 | 0.2623 | 1389.36 | 1389.549 | 6578   | 1                                                                               | 971.7  | 70.8 | 1 K.ASSNQLVTLQEAK.L          |
| *              | HsH2AZ-FLAG_293_   | 3.8172 | 0.2298 | 1350.36 | 1349.567 | 5110.1 | 3                                                                               | 1150.5 | 90   | 6 K.LLLNEDDYLIK.A            |
| *              | HsTIP60_Ti_102.179 | 3.7725 | 0.3285 | 1455.46 | 1456.511 | 7079.8 | 1                                                                               | 1070.2 | 70.8 | 4 R.DGSTNNDPYVAFR.R          |
| *              | HsMRGBP-FLAG_Ti_   | 5.0443 | 0.4025 | 1863.49 | 1864.068 | 7079.5 | 1                                                                               | 1471.5 | 73.3 | 3 K.RYHLGDYGGEILNEVK.I       |
| *              | HsH2AZ-FLAG_293_   | 5.5498 | 0.3703 | 2150.81 | 2151.465 | 5027.1 | 1                                                                               | 1150.9 | 65.8 | 14 K.AEALITSQQPTPETLPVINK.S  |
| *              | HsMRGBP-FLAG_Ti_   | 3.3239 | 0.3043 | 1243.49 | 1242.346 | 6196.8 | 1                                                                               | 855.6  | 83.3 | 3 R.RAGCQYYAPR.L             |
| *              | HsYL1_Ti_103.1483. | 5.4696 | 0.428  | 2060.29 | 2060.105 | 7219.4 | 1                                                                               | 1533.7 | 67.6 | 3 R.LDQANHSCENSELADLDK.L     |
| *              | HsH2AZ-FLAG_293_   | 2.8923 | 0.3222 | 1198.49 | 1198.374 | 5620.2 | 1                                                                               | 755.3  | 77.8 | 4 R.HCLTTLTVPR.R             |
| *              | HsH2AZ-FLAG_293_   | 4.5306 | 0.1583 | 1245.23 | 1245.462 | 7770.2 | 1                                                                               | 1861.3 | 95   | 12 R.LSLSEILSNIR.S           |
| *              | HsMRGBP-FLAG_Ti_   | 4.6959 | 0.4251 | 1768.76 | 1767.81  | 6094.5 | 1                                                                               | 1614.7 | 78.6 | 3 R.LLNQDSDSECTSR.K          |
| *              | HsFLAG-TIP49b_Ti_  | 4.6848 | 0.3504 | 1417.43 | 1417.649 | 7796.7 | 1                                                                               | 1814   | 80.8 | 8 K.RVSAASVALLNTSK.N         |
| *              | HsYL1_Ti_103.1279. | 4.9097 | 0.4149 | 2081.84 | 2082.194 | 8020.8 | 1                                                                               | 768.4  | 47.4 | 5 K.EQNTGHNNINGVVQPSGTSK.T   |
| *              | HsMRGBP-FLAG_Ti_   | 4.6769 | 0.3636 | 2295.96 | 2296.644 | 6586.8 | 1                                                                               | 946.4  | 52.4 | 7 K.TLYSTNMALSSSPGISAVQLVR.T |
| *              | HsYL1_Ti_104.1504. | 3.6559 | 0.2482 | 1361.71 | 1359.627 | 5202.5 | 1                                                                               | 996.3  | 75   | 10 K.LATVAASMDRVPK.V         |
| *              | HsTIP60_Ti_104.176 | 2.8979 | 0.2743 | 1189.04 | 1189.354 | 3382.4 | 1                                                                               | 534.7  | 77.3 | 2 K.VTPSSAISIAR.E            |
| gij 4502491 re | 4                  | 42     | 32.30% | 282     | 31362    | 4.8    | complement component 1, q subcomponent binding protein precursor [Homo sapiens] |        |      |                              |

|                |                     |        |        |         |          |         |   |                                                                       |      |                                           |
|----------------|---------------------|--------|--------|---------|----------|---------|---|-----------------------------------------------------------------------|------|-------------------------------------------|
| *              | HsFLAG-ARP6_Ti_1    | 4.0704 | 0.3394 | 1698.18 | 1698.87  | 6494.6  | 1 | 1811.6                                                                | 84.6 | 8 K.AFVDFLSDEIKEER.K                      |
| *              | HsFLAG-ARP6_Ti_1    | 4.7154 | 0.3807 | 2287.37 | 2288.557 | 6492.7  | 1 | 1104.9                                                                | 57.9 | 6 K.VEEQPELTSTPNFVVEVIK.N                 |
| *              | HsFLAG-ARP6_Ti_1    | 5.5774 | 0.3822 | 3138.46 | 3138.291 | 10844.4 | 1 | 1977.8                                                                | 34.6 | 4 K.ALVLDCHPYDEVEGQDEAEEDIFSIR.E          |
| *              | HsFLAG-p53-DNA-D    | 5.4367 | 0.4228 | 3441.71 | 3441.77  | 5612.1  | 1 | 882                                                                   | 30.2 | 24 R.GVDNTFADELVELSTALEHQEYITFLEDLK.S     |
| gij 4506691 re |                     | 9      | 59     | 32.20%  | 146      | 16445   |   | 10.2 ribosomal protein S16 [Homo sapiens]                             |      |                                           |
|                | HsFlag-NUFIP_Ti_1C  | 2.904  | 0.1815 | 1187.59 | 1188.372 | 3118    | 1 | 273.3                                                                 | 70   | 3 K.GPLQSVQVFGFR.K                        |
|                | HsFlag-NUFIP_Ti_1C  | 4.3186 | 0.3903 | 1188.47 | 1188.372 | 7132    | 1 | 1293.4                                                                | 80   | 16 K.GPLQSVQVFGFR.K                       |
| *              | HsFLAG-ARP6_Ti_1    | 3.3579 | 0.1449 | 1411.32 | 1411.662 | 3646.3  | 3 | 721.2                                                                 | 72.7 | 9 K.VNGRPLEMIEPR.T                        |
| *              | HsFlag-NUFIP_Ti_1C  | 3.8007 | 0.219  | 1413.97 | 1411.662 | 6498.2  | 5 | 1264.9                                                                | 54.5 | 2 K.VNGRPLEMIEPR.T                        |
|                | HsFLAG-ARP6_Ti_1    | 2.388  | 0.1364 | 1095.61 | 1095.411 | 6978.4  | 1 | 694                                                                   | 72.2 | 1 K.LLEPVLLLGK.E                          |
|                | HsFlag-NUFIP_Ti_1C  | 3.3932 | 0.185  | 1096.44 | 1095.411 | 3924.4  | 6 | 728                                                                   | 83.3 | 6 K.LLEPVLLLGK.E                          |
|                | HsFlag-NUFIP_Ti_1C  | 3.4539 | 0.2966 | 1380.5  | 1380.714 | 6299.5  | 1 | 1250.7                                                                | 86.4 | 5 K.LLEPVLLLGKER.F                        |
| *              | HsFlag-NUFIP_Ti_1C  | 2.7732 | 0.2364 | 1241.76 | 1242.423 | 6137    | 2 | 571.5                                                                 | 59.1 | 4 K.GGGHVAQIYAIR.Q                        |
| *              | HsFlag-NUFIP_Ti_1C  | 4.0204 | 0.285  | 1242.45 | 1242.423 | 6150.9  | 1 | 1269.4                                                                | 77.3 | 13 K.GGGHVAQIYAIR.Q                       |
| gij 16579885 r |                     | 15     | 60     | 32.10%  | 427      | 47697   |   | 11.1 ribosomal protein L4 [Homo sapiens]                              |      |                                           |
| *              | HsFLAG-ARP6_Ti_1    | 2.1777 | 0.1767 | 988.36  | 989.203  | 5059.3  | 1 | 556.6                                                                 | 75   | 3 K.NVTLPVFK.A                            |
| *              | HsFLAG-TIP49b_Ti_   | 6.9189 | 0.4809 | 2717.63 | 2717.874 | 9774.2  | 1 | 2428.7                                                                | 40.6 | 4 K.NNRQPYAVSELAGHQTSAESWGTR.A            |
| *              | HsFLAG-TCF3_Ti_1C   | 4.741  | 0.5423 | 2332.27 | 2333.479 | 7057.2  | 1 | 1033.2                                                                | 54.8 | 2 R.QPYAVSELAGHQTSAESWGTR.A               |
|                | HsFLAG-ARP6_Ti_1    | 5.5867 | 0.5563 | 2093.86 | 2094.487 | 4334    | 1 | 954.9                                                                 | 65.8 | 3 K.RYAICSALAASALPALVMSK.G                |
|                | HsFLAG-TCF3_Ti_1C   | 4.5736 | 0.5142 | 1938.49 | 1938.299 | 8166.2  | 1 | 1235.3                                                                | 58.3 | 7 R.YAICSALAASALPALVMSK.G                 |
| *              | HsFLAG-p53-DNA-D    | 5.452  | 0.343  | 2539    | 2536.888 | 8831.1  | 2 | 1433.9                                                                | 36.9 | 1 K.GHRIEVPPELPLVVEDKVEGYK.K              |
|                | HsFlag-les6_293_Ti_ | 2.9087 | 0.1544 | 1609.37 | 1609.857 | 2346    | 7 | 439.1                                                                 | 69.2 | 1 R.IEEVPELPLVVEDK.V                      |
| *              | HsFLAG-TCF3_Ti_1C   | 2.954  | 0.2849 | 2186.53 | 2186.507 | 5631.4  | 3 | 334.9                                                                 | 41.7 | 2 R.IEEVPELPLVVEDKVEGYK.K                 |
| *              | HsFLAG-ARP6_Ti_1    | 4.4088 | 0.3261 | 1763.26 | 1762.97  | 6301.6  | 1 | 1588.3                                                                | 78.6 | 6 R.RGPCIYNEDNGIIK.A                      |
| *              | HsFLAG-TCF3_Ti_1C   | 3.3252 | 0.3665 | 1269.62 | 1269.527 | 3056.9  | 1 | 685.6                                                                 | 86.4 | 9 R.NIPGITLLNVSK.L                        |
|                | HsFLAG-ARP6_Ti_1    | 3.6129 | 0.2296 | 1281.88 | 1281.454 | 6318.2  | 1 | 1378.2                                                                | 88.9 | 2 R.KLDELYGTWR.K                          |
|                | HsFLAG-ARP6_Ti_1    | 2.8948 | 0.1593 | 1106.11 | 1104.269 | 5469.3  | 2 | 691.5                                                                 | 75   | 2 K.SNYNLPMHK.M                           |
| *              | HsFLAG-ARP6_Ti_1    | 2.6945 | 0.084  | 956.54  | 957.118  | 8631    | 1 | 1115.9                                                                | 70   | 7 K.AAAAAAALQAK.S                         |
| *              | HsFLAG-ARP6_Ti_1    | 4.5522 | 0.1208 | 957.25  | 957.118  | 7441.3  | 1 | 2498.1                                                                | 95   | 8 K.AAAAAAALQAK.S                         |
| *              | HsVPS71-FLAG_Ti_    | 5.061  | 0.3276 | 1416.55 | 1416.574 | 8820.3  | 1 | 2510.7                                                                | 82.1 | 3 K.AAAAAAALQAKSDEK.A                     |
| gij 4758486 re |                     | 1      | 2      | 32.10%  | 109      | 12457   |   | 6.8 general transcription factor IIA, 2 (12kD subunit) [Homo sapiens] |      |                                           |
| *              | HsFLAG-Lin9_Ti_20   | 4.4058 | 0.1252 | 3927.48 | 3928.429 | 6461.1  | 1 | 1119.1                                                                | 28.7 | 2 R.NTTLGNLQESLDELIIQSQQITPQLALQVLLQFDK.A |
| gij 12056465 r |                     | 8      | 81     | 31.80%  | 321      | 33784   |   | 10.2 fibrillarin [Homo sapiens]                                       |      |                                           |
| *              | HsFLAG-TIP49b_Ti_   | 2.6929 | 0.1572 | 1981.26 | 1981.249 | 8963.7  | 8 | 463                                                                   | 43.3 | 2 K.NVMVEPHRHGVEFICR.G                    |
| *              | HsFLAG-p53-DNA-D    | 3.1118 | 0.1175 | 961.27  | 961.103  | 4395.5  | 2 | 909.5                                                                 | 87.5 | 1 R.GKEDALVTK.N                           |
|                | HsARP6-FLAG_Ti_1    | 4.5227 | 0.3922 | 1520.33 | 1519.828 | 5301.5  | 1 | 1088.6                                                                | 71.4 | 6 K.LAAAILGGVDQIHIK.P                     |
| *              | HsFLAG-TIP49b_Ti_   | 6.1047 | 0.4638 | 1872.49 | 1873.249 | 7382.3  | 1 | 1870.5                                                                | 66.7 | 19 K.LAAAILGGVDQIHIKPGAK.V                |
| *              | HsFLAG-Lin9_Ti_20   | 3.7983 | 0.1885 | 1873.66 | 1873.249 | 6939.8  | 9 | 822.8                                                                 | 34.7 | 4 K.LAAAILGGVDQIHIKPGAK.V                 |
| *              | HsFLAG-ARP6_Ti_1    | 7.7894 | 0.465  | 3417.7  | 3418.831 | 7774.5  | 1 | 1827.7                                                                | 34.4 | 24 K.VLYLGAASGTTVSHVSDIVGPDGLVYAVEFSHR.S  |
|                | HsFLAG-FLJ20729_    | 3.5477 | 0.3144 | 1255.3  | 1255.506 | 7510.1  | 1 | 1217.3                                                                | 80   | 16 R.IVALNAHTFLR.N                        |
| *              | HsFLAG-Lin9_Ti_20   | 5.1605 | 0.3934 | 1535.57 | 1534.801 | 7444.7  | 1 | 1996.2                                                                | 80.8 | 9 R.DHAVVVGVYRPPPK.V                      |
| gij 5803137 re |                     | 2      | 9      | 31.80%  | 157      | 17170   |   | 8.9 RNA binding motif protein 3 isoform a [Homo sapiens]              |      |                                           |
| gij 63054840 r |                     | 2      | 9      | 55.60%  | 90       | 9668    |   | 4.8 RNA binding motif protein 3 isoform b [Homo sapiens]              |      |                                           |

|             |                    |        |        |         |          |         |                                                                    |        |      |    |                                       |
|-------------|--------------------|--------|--------|---------|----------|---------|--------------------------------------------------------------------|--------|------|----|---------------------------------------|
|             | HsFLAG-p53-DNA-D   | 4.8768 | 0.3    | 3495.95 | 3496.898 | 7412.6  | 1                                                                  | 963    | 28.2 | 7  | K.LFVGGGLNFNTDEQALDHFSSFGPISEVVVVK.D  |
|             | HsFLAG-p53-DNA-D   | 4.4205 | 0.4586 | 1984.33 | 1983.252 | 7608.5  | 1                                                                  | 1162.3 | 55.9 | 2  | R.GFGFITFTNPEHASVAMR.A                |
| gi 38372923 | r                  | 3      | 4      | 31.70%  | 205      | 22764   | 5.5 basigin isoform 4 [Homo sapiens]                               |        |      |    |                                       |
|             | HsFLAG-ARP6_Ti_1   | 5.5517 | 0.4627 | 3515.64 | 3517.817 | 6968.8  | 1                                                                  | 763.8  | 26.7 | 1  | R.VSDDDQWGEYSCVFLPEPMGTANIQLHGPPR.V   |
|             | HsFLAG-ARP6_Ti_1   | 5.1703 | 0.4656 | 1805.05 | 1805.964 | 6259.5  | 1                                                                  | 2075   | 80   | 1  | K.SSEHINEGETAMLVCK.S                  |
|             | HsFLAG-ARP6_Ti_1   | 4.433  | 0.3832 | 2117.57 | 2117.298 | 5643.6  | 1                                                                  | 1325.1 | 70.6 | 2  | R.SELHIENLNMEADPGQYR.C                |
| gi 4759160  | re                 | 5      | 41     | 31.70%  | 126      | 13916   | 10.3 small nuclear ribonucleoprotein polypeptide D3 [Homo sapiens] |        |      |    |                                       |
| *           | HsFlag-NUFIP_Ti_1C | 4.6692 | 0.3176 | 2416.54 | 2415.588 | 11360.4 | 1                                                                  | 1640.2 | 37.5 | 3  | K.VLHEAEGHIVTCETNTGEVYR.G             |
| *           | HsFlag-NUFIP_Ti_1C | 6.7218 | 0.5018 | 2416.96 | 2415.588 | 7484.3  | 1                                                                  | 1877.2 | 65   | 25 | K.VLHEAEGHIVTCETNTGEVYR.G             |
| *           | HsFlag-VPS71_Ti_1C | 2.4371 | 0.2153 | 1218.61 | 1219.426 | 5612    | 1                                                                  | 472.9  | 66.7 | 4  | R.VAQLEQVYIR.G                        |
| *           | HsFLAG-p53-DNA-D   | 3.7425 | 0.1769 | 1219.04 | 1219.426 | 9954.9  | 1                                                                  | 1599.2 | 83.3 | 8  | R.VAQLEQVYIR.G                        |
| *           | HsFlag-VPS71_Ti_1C | 2.2754 | 0.1083 | 1089.58 | 1090.409 | 6537.1  | 4                                                                  | 854.8  | 75   | 1  | R.FLILPDMLK.N                         |
| gi 4506769  | re                 | 3      | 5      | 31.70%  | 101      | 11457   | 6.8 S100 calcium-binding protein A7 [Homo sapiens]                 |        |      |    |                                       |
| *           | HsFLAG-p53-DNA-D   | 4.3768 | 0.3806 | 1385.53 | 1385.56  | 7241.7  | 1                                                                  | 1375.9 | 77.3 | 2  | K.KGTNYLADVFEK.K                      |
| *           | HsFLAG-FLJ20729_   | 4.825  | 0.2672 | 2312    | 2313.612 | 8577.9  | 1                                                                  | 1247   | 38.2 | 2  | K.KIDFSEFLLSLLGDIATDYHK.Q             |
| *           | HsFLAG-p53-DNA-D   | 3.7409 | 0.3327 | 2314.2  | 2313.612 | 9197.5  | 1                                                                  | 931.3  | 50   | 1  | K.KIDFSEFLLSLLGDIATDYHK.Q             |
| gi 50053795 | r                  | 16     | 98     | 31.60%  | 611      | 69151   | 5.7 eukaryotic translation initiation factor 4B [Homo sapiens]     |        |      |    |                                       |
| *           | HsFlag-VPS71_Ti_1C | 5.0351 | 0.511  | 2277.71 | 2277.447 | 7648.8  | 1                                                                  | 1190.4 | 52.3 | 5  | K.TISLTDFLAEDGGTGGGTYVSK.P            |
| *           | HsFlag-FLJ90652_2C | 4.9436 | 0.4624 | 2340.67 | 2342.607 | 6349.9  | 1                                                                  | 1262.4 | 60   | 23 | K.SPPYTAFLGNLPYDVTEESIK.E             |
| *           | HsFLAG-FLJ20729_   | 4.6182 | 0.2412 | 2342.57 | 2342.607 | 9082.3  | 2                                                                  | 1347.9 | 36.2 | 2  | K.SPPYTAFLGNLPYDVTEESIK.E             |
| *           | HsFLAG-p53-DNA-D   | 4.965  | 0.324  | 2922.64 | 2922.263 | 7167.8  | 1                                                                  | 1103.2 | 35.4 | 4  | K.SPPYTAFLGNLPYDVTEESIKEFFR.G         |
| *           | HsMRGBP-FLAG_Ti_1  | 2.7724 | 0.1656 | 1195.59 | 1195.321 | 6583.5  | 2                                                                  | 759.3  | 72.2 | 1  | R.LPREPSNPER.L                        |
| *           | HsFLAG-p53-DNA-D   | 5.7874 | 0.3817 | 2947.51 | 2948.169 | 7966.7  | 1                                                                  | 1536.6 | 48.1 | 22 | K.GFGYAEFEDLDSLLSALSLSLNEESLGNR.R     |
| *           | HsMRGBP-FLAG_Ti_1  | 5.0467 | 0.1381 | 2950.53 | 2948.169 | 10039.1 | 1                                                                  | 1574.3 | 31.7 | 2  | K.GFGYAEFEDLDSLLSALSLSLNEESLGNR.R     |
| *           | HsFlag-VPS71_Ti_1C | 4.9707 | 0.3273 | 3104.52 | 3104.357 | 5434.3  | 1                                                                  | 872.8  | 31.5 | 11 | K.GFGYAEFEDLDSLLSALSLSLNEESLGNRR.I    |
| *           | HsFlag-VPS71_Ti_1C | 4.1192 | 0.2945 | 1358.71 | 1358.494 | 5532.5  | 1                                                                  | 1459.3 | 86.4 | 8  | R.IRVDVADQAQDK.D                      |
| *           | HsMRGBP-FLAG_Ti_1  | 3.4433 | 0.3326 | 1608.91 | 1608.707 | 3914.8  | 1                                                                  | 634.6  | 65.4 | 3  | R.ARPATDSFDDYPPR.R                    |
| *           | HsFLAG-ARP5_Ti_1   | 3.1881 | 0.2788 | 1316.5  | 1316.373 | 6016.6  | 1                                                                  | 861.1  | 80   | 2  | R.RGDDSFQDKYR.D                       |
| *           | HsARP6-FLAG_Ti_1   | 3.9198 | 0.4048 | 1532.11 | 1532.74  | 5358.3  | 1                                                                  | 1090.8 | 73.3 | 8  | R.AASIFGGAKPVDTAAR.E                  |
| *           | HsMRGBP-FLAG_Ti_1  | 4.9695 | 0.3042 | 3222.02 | 3220.483 | 7281.3  | 1                                                                  | 776.3  | 28.7 | 3  | K.SLENETLNKEEDCHSPTSKPPKPDQPLK.V      |
| *           | HsFlag-NUFIP_Ti_2C | 3.6027 | 0.0825 | 2191.47 | 2191.369 | 10191.3 | 1                                                                  | 1075.4 | 34.7 | 1  | K.EEDCHSPTSKPPKPDQPLK.V               |
| *           | HsFlag-VPS71_Ti_1C | 2.6719 | 0.2771 | 1294.88 | 1295.395 | 3197.4  | 6                                                                  | 372.3  | 62.5 | 2  | K.VAPAQPSEEGPGR.K                     |
| *           | HsFlag-VPS71_Ti_1C | 3.4736 | 0.2024 | 1447.71 | 1446.618 | 7402.2  | 3                                                                  | 1241.9 | 70.8 | 1  | R.KDENKVDGMNAPK.G                     |
| gi 4759276  | re                 | 8      | 41     | 31.60%  | 475      | 51841   | 7.9 RNA, U3 small nucleolar interacting protein 2 [Homo sapiens]   |        |      |    |                                       |
| *           | HsFlag-NUFIP_Ti_2C | 3.3941 | 0.1608 | 1130.15 | 1130.286 | 5460.9  | 5                                                                  | 1007   | 93.8 | 1  | R.LKEDVLEQR.G                         |
| *           | HsFlag-NUFIP_Ti_1C | 4.4019 | 0.3453 | 2430.97 | 2431.714 | 7309.9  | 1                                                                  | 1477.2 | 56.8 | 1  | R.GHQLSITCLVTPDDSAIFSAK.D             |
| *           | HsFlag-NUFIP_Ti_1C | 3.1555 | 0.2603 | 1402.53 | 1402.466 | 6514.8  | 1                                                                  | 767.8  | 68.2 | 2  | R.GTHQLYSTSHDR.S                      |
| *           | HsFlag-NUFIP_Ti_1C | 5.4616 | 0.4749 | 3076.3  | 3077.38  | 5091.8  | 1                                                                  | 1270   | 37   | 13 | K.VWNVAENSYVETLFGHQDAVAALDALS.R.E     |
| *           | HsFlag-NUFIP_Ti_11 | 5.1034 | 0.4372 | 3500.34 | 3500.856 | 5260    | 1                                                                  | 1303.9 | 35.2 | 12 | R.GEPGLEQPFWISSVAALLNTDLVATGSHSSCVR.L |
| *           | HsFlag-NUFIP_Ti_1C | 5.3448 | 0.4261 | 2058.66 | 2059.42  | 5561.5  | 1                                                                  | 1124.2 | 70.6 | 6  | R.QLDLLCDIPLVGFINSK.F                 |
| *           | HsFlag-NUFIP_Ti_2C | 3.6668 | 0.4162 | 1794.1  | 1793.933 | 7532.5  | 1                                                                  | 771.8  | 53.1 | 2  | K.FSSSGDFLVAGVGQEHR.L                 |
| *           | HsFlag-NUFIP_Ti_1C | 2.3072 | 0.2668 | 950.46  | 951.114  | 3209.1  | 3                                                                  | 220.2  | 55.6 | 4  | R.RVPVPPAAGS.-                        |
| gi 5031857  | re                 | 8      | 16     | 31.60%  | 332      | 36689   | 8.3 lactate dehydrogenase A [Homo sapiens]                         |        |      |    |                                       |

|                 |                    |        |        |         |          |        |                                                                              |        |      |   |                                        |
|-----------------|--------------------|--------|--------|---------|----------|--------|------------------------------------------------------------------------------|--------|------|---|----------------------------------------|
| *               | HsFlag-VPS71_Ti_10 | 4.6167 | 0.2271 | 2074.84 | 2075.326 | 9802.4 | 1                                                                            | 1317.2 | 56.2 | 2 | K.DQLIYNLLKKEEQTPQNK.I                 |
| *               | HsH2AZ-FLAG_293_   | 5.4577 | 0.4296 | 1658.46 | 1658.843 | 7050.7 | 1                                                                            | 1979.3 | 78.6 | 6 | K.DLADELALVDVIEDK.L                    |
| *               | HsFlag-VPS71_Ti_10 | 3.4513 | 0.3412 | 1249.89 | 1249.332 | 4382.8 | 1                                                                            | 752.9  | 77.3 | 2 | R.VIGSGCNLDSAR.F                       |
| *               | HsFlag-VPS71_Ti_10 | 2.9815 | 0.2364 | 1265.74 | 1265.449 | 5763.1 | 2                                                                            | 553.1  | 70   | 1 | K.QVVESAYEVIK.L                        |
| *               | HsFlag-VPS71_Ti_10 | 4.2519 | 0.4505 | 2114.8  | 2113.433 | 6846   | 1                                                                            | 1126.9 | 55.3 | 1 | K.GYTSWAIGLSVADLAESIMK.N               |
| *               | HsFLAG-p53-DNA-D   | 2.598  | 0.1525 | 1168.42 | 1168.443 | 7309.1 | 1                                                                            | 1214.3 | 83.3 | 1 | R.RVHPVSTMIK.G                         |
| *               | HsH2AZ-FLAG_293_   | 3.0188 | 0.2594 | 1135.29 | 1135.216 | 7635.8 | 1                                                                            | 1483.1 | 94.4 | 2 | K.VTLTSEEEAR.L                         |
| *               | HsFlag-VPS71_Ti_10 | 2.6653 | 0.3028 | 1119.62 | 1119.263 | 5204.5 | 1                                                                            | 471.7  | 61.1 | 1 | K.SADTLWGIQK.E                         |
| gij 33636750 re | 25                 | 44     | 31.40% | 1292    | 141383   | 5.1    | likely ortholog of mouse ubiquitin-conjugating enzyme E2-230K [Homo sapiens] |        |      |   |                                        |
| *               | HsFlag-FLJ90652_29 | 2.491  | 0.3211 | 1243.35 | 1244.436 | 2137.6 | 1                                                                            | 188.9  | 70   | 1 | R.LLFSHDLVSGR.Y                        |
| *               | HsFlag-FLJ90652_29 | 3.2525 | 0.2516 | 1244.08 | 1244.436 | 7175.7 | 1                                                                            | 951.7  | 75   | 2 | R.LLFSHDLVSGR.Y                        |
| *               | HsFlag-FLJ90652_29 | 2.3423 | 0.2062 | 1105.34 | 1106.266 | 5797.8 | 4                                                                            | 497.1  | 62.5 | 2 | R.VQWYPEGVK.Q                          |
| *               | HsFlag-FLJ90652_29 | 5.3377 | 0.4745 | 3565.03 | 3565.926 | 6897.8 | 1                                                                            | 1955.3 | 34.7 | 3 | K.LYDVCPHVSDSGLFFDDSYGFYPGQVLIGPAK.I   |
| *               | HsFlag-FLJ90652_29 | 4.2847 | 0.2482 | 1351.04 | 1351.588 | 6745.5 | 1                                                                            | 1459.2 | 81.8 | 2 | K.IFSSVQWLSGVK.P                       |
| *               | HsFlag-FLJ90652_29 | 5.3554 | 0.4806 | 2503.8  | 2503.694 | 4594.2 | 1                                                                            | 639.3  | 50   | 4 | K.SFCPPGTDVSPPPSVITQENLGR.V            |
| *               | HsFlag-FLJ90652_29 | 2.766  | 0.2322 | 1103.92 | 1104.177 | 7295.8 | 2                                                                            | 886.8  | 81.2 | 1 | R.LGCFDHAQR.Q                          |
| *               | HsFlag-FLJ90652_29 | 3.409  | 0.3912 | 1521.58 | 1522.794 | 6793.4 | 1                                                                            | 1094.8 | 75   | 1 | R.CLYVFPKVEPAK.I                       |
| *               | HsFlag-FLJ90652_29 | 2.5194 | 0.1858 | 1442.41 | 1442.516 | 5874.5 | 3                                                                            | 421.8  | 59.1 | 1 | R.IMSCSPDTQCSR.D                       |
| *               | HsFlag-FLJ90652_29 | 5.7586 | 0.309  | 2819.39 | 2817.009 | 8868.1 | 1                                                                            | 1439.7 | 35.9 | 2 | R.SNDLFPVHHLDNNEFCPGDFVVDK.R           |
| *               | HsFlag-FLJ90652_29 | 5.0538 | 0.4124 | 2397.97 | 2398.607 | 8394   | 1                                                                            | 1684.4 | 39.3 | 2 | K.RVQSCPDPVYGVVQSGDHIGR.T              |
| *               | HsFlag-FLJ90652_29 | 3.6056 | 0.3314 | 3289.74 | 3289.493 | 7794.5 | 4                                                                            | 480.8  | 24.1 | 1 | K.LRPSGDDVELIGEEDVSVYDIADHPDFR.F       |
| *               | HsFlag-FLJ90652_29 | 3.5085 | 0.1501 | 2307.16 | 2307.439 | 8664.8 | 8                                                                            | 764.3  | 32.1 | 1 | R.IGNTEDGAPHKEDEPSVGQVAR.V             |
| *               | HsFlag-FLJ90652_29 | 3.6963 | 0.3379 | 2308.41 | 2307.439 | 9517.9 | 1                                                                            | 664.3  | 40.5 | 1 | R.IGNTEDGAPHKEDEPSVGQVAR.V             |
| *               | HsFlag-FLJ90652_29 | 3.5682 | 0.4793 | 1999.43 | 1999.268 | 3905.1 | 1                                                                            | 748.5  | 67.6 | 2 | K.IEPPIPPLEQPVAPEDK.G                  |
| *               | HsFlag-FLJ90652_29 | 4.2931 | 0.3773 | 2613.67 | 2613.943 | 7045.3 | 1                                                                            | 641.8  | 43.5 | 3 | K.NMTVEQLLTGSPTSPTVEPEKPTR.E           |
| *               | HsFlag-FLJ90652_29 | 1.8593 | 0.2874 | 907.36  | 908.042  | 4353.7 | 2                                                                            | 290.4  | 68.8 | 1 | K.PGVTFITSAK.G                         |
| *               | HsFlag-FLJ90652_29 | 3.8379 | 0.3311 | 1895.04 | 1896.109 | 6415.1 | 1                                                                            | 621    | 53.1 | 5 | K.GEVFSVLEFAPSNSHSFK.K                 |
| *               | HsFlag-FLJ90652_29 | 2.3042 | 0.1344 | 1186.45 | 1187.381 | 5107.7 | 1                                                                            | 459.5  | 61.1 | 1 | K.KIEFQPPEAK.K                         |
| *               | HsFlag-FLJ90652_29 | 5.2809 | 0.403  | 4032.23 | 4033.461 | 7037.7 | 1                                                                            | 1753.4 | 31.8 | 2 | R.TPYEDGLYLFDIQLPNIYPAVPPHFCYLSQCSGR.L |
| *               | HsFlag-FLJ90652_29 | 3.3143 | 0.2328 | 1152.38 | 1153.194 | 6774.5 | 1                                                                            | 1373.5 | 83.3 | 2 | R.GLQEGYENSR.C                         |
| *               | HsFlag-FLJ90652_29 | 3.9502 | 0.237  | 1569.22 | 1569.798 | 8418.6 | 1                                                                            | 1588.7 | 79.2 | 1 | R.IESWLETHALLEK.A                      |
| *               | HsFlag-FLJ90652_29 | 3.6813 | 0.3087 | 2307.03 | 2308.464 | 9548.7 | 1                                                                            | 620.9  | 40.5 | 1 | R.DHTDQTSETAPDASVPPSVKPK.K             |
| *               | HsFlag-FLJ90652_29 | 3.3723 | 0.221  | 1639.16 | 1638.904 | 5868.1 | 1                                                                            | 757.4  | 60.7 | 1 | K.SGYPDIGFPLFPLSK.G                    |
| *               | HsFlag-FLJ90652_29 | 4.6637 | 0.3444 | 1637.61 | 1635.793 | 5113.6 | 1                                                                            | 929.3  | 71.4 | 1 | R.AALLEAGMPECTEDK.-                    |
| gij 5454064 re  | 13                 | 26     | 31.40% | 669     | 69492    | 9.7    | RNA binding motif protein 14 [Homo sapiens]                                  |        |      |   |                                        |
| *               | HsFLAG-p53-DNA-D   | 3.2507 | 0.1971 | 1557.77 | 1556.768 | 9823.4 | 1                                                                            | 933.3  | 57.7 | 1 | R.AIEALHGHEL RPGR.A                    |
| *               | HsFLAG-ARP6_Ti_1   | 5.1888 | 0.3915 | 1753.94 | 1752.931 | 5538.3 | 1                                                                            | 2233.4 | 90   | 3 | K.IFVGNVSAACTSQELR.S                   |
| *               | HsFLAG-UTX1_Ti_2   | 3.2243 | 0.3842 | 1157.52 | 1157.312 | 6753.4 | 1                                                                            | 1146.4 | 77.3 | 4 | K.KGPG LAVQSGDK.T                      |
| *               | HsFLAG-Lin9_Ti_20  | 4.2998 | 0.2303 | 3688.06 | 3687.877 | 9204.7 | 1                                                                            | 602.5  | 20.1 | 1 | Q                                      |
| *               | HsFLAG-Lin9_Ti_20  | 3.6133 | 0.2897 | 1609.76 | 1609.822 | 5516.9 | 1                                                                            | 754    | 64.3 | 2 | R.ASYVAPLTAQPATYR.A                    |
| *               | HsFLAG-Lin9_Ti_20  | 2.3044 | 0.2343 | 1219.47 | 1220.371 | 5698.2 | 1                                                                            | 384.3  | 63.6 | 1 | R.AQPSVSLGAAYR.A                       |
| *               | HsFLAG-Lin9_Ti_20  | 3.0212 | 0.2475 | 1246    | 1246.409 | 5603.3 | 1                                                                            | 814.5  | 72.7 | 1 | R.AQPSVSLGAPYR.G                       |
| *               | HsFLAG-Lin9_Ti_20  | 4.5109 | 0.4856 | 2465.02 | 2466.629 | 7183.7 | 1                                                                            | 985.2  | 47.8 | 3 | R.TQSSASLAASYAAQQHPQAAASYR.G           |



|               |                    |        |        |         |          |                                                                 |   |        |      |                                           |
|---------------|--------------------|--------|--------|---------|----------|-----------------------------------------------------------------|---|--------|------|-------------------------------------------|
| *             | HsFLAG-ARP6_Ti_1   | 3.9724 | 0.3264 | 2466.46 | 2466.629 | 4636                                                            | 1 | 659.2  | 32.6 | 1 R.TQSSASLAASYAAQQHPQAAASYR.G            |
| *             | HsFLAG-Lin9_Ti_20  | 3.552  | 0.1737 | 3696.14 | 3696.943 | 6642.1                                                          | 1 | 475.2  | 20.8 | 1 T                                       |
| *             | HsFLAG-ARP6_Ti_1   | 3.9119 | 0.2204 | 1223.58 | 1223.374 | 7771.7                                                          | 1 | 1594   | 94.4 | 2 R.RLSESQLSFR.R                          |
| *             | HsFlag-NUFIP_Ti_2C | 3.3825 | 0.3179 | 1301.38 | 1301.404 | 5767.5                                                          | 1 | 983.8  | 80   | 5 R.RLPDAHSDYAR.Y                         |
| *             | HsFLAG-p53-DNA-D   | 2.3823 | 0.2128 | 1148.47 | 1149.269 | 6910.2                                                          | 1 | 437.9  | 66.7 | 1 R.AAQMHSGYQR.R                          |
| gi 9507215 re | 16                 | 335    | 31.20% | 449     | 50094    | 5.1 tubulin, alpha 8 [Homo sapiens]                             |   |        |      |                                           |
|               | HsFLAG-p53-DNA-D   | 3.8546 | 0.3066 | 2415.78 | 2416.655 | 9887                                                            | 1 | 636.1  | 42.5 | 25 R.QLFHPEQLITGKEDAANNYAR.G              |
|               | HsSrcap_Ti_204.213 | 5.0964 | 0.4219 | 2416.38 | 2416.655 | 6002.3                                                          | 1 | 934.1  | 37.5 | 18 R.QLFHPEQLITGKEDAANNYAR.G              |
|               | HsScrap_Ti_106.239 | 2.55   | 0.1652 | 1877.45 | 1876.082 | 6295.5                                                          | 1 | 349.4  | 53.6 | 1 R.RNLDIERPTYTNLNR.L                     |
|               | HsFlag-ZnF-HIT2_Ti | 2.9442 | 0.2517 | 1719.52 | 1719.895 | 6354.4                                                          | 3 | 522.7  | 57.7 | 12 R.NLDIERPTYTNLNR.L                     |
|               | HsFLAG-ARP6_Ti_1   | 5.0973 | 0.4595 | 1487.62 | 1488.768 | 7314.4                                                          | 1 | 1783.7 | 80.8 | 94 R.LISQIVSSITASLR.F                     |
|               | HsFLAG-Lin9_Ti_20  | 3.9906 | 0.2202 | 1487.96 | 1488.768 | 5903.2                                                          | 1 | 1035.4 | 48.1 | 1 R.LISQIVSSITASLR.F                      |
|               | HsFLAG-ARP6_Ti_1   | 5.8116 | 0.4265 | 2410.46 | 2410.689 | 5990.7                                                          | 1 | 1327.4 | 60   | 74 R.FDGLNVDLTEFQTNLVPYPR.I               |
|               | HsSrcap_Ti_205.279 | 4.5969 | 0.4286 | 1755.42 | 1755.98  | 5429.1                                                          | 1 | 785.6  | 65.4 | 26 K.RTIQFVDWCPTGFK.V                     |
|               | HsSrcap_Ti_205.280 | 4.8872 | 0.2348 | 1757.48 | 1755.98  | 8327.5                                                          | 1 | 2242.3 | 57.7 | 10 K.RTIQFVDWCPTGFK.V                     |
|               | HsSrcap_Ti_202.300 | 2.6402 | 0.345  | 1598.54 | 1599.793 | 6635.7                                                          | 1 | 411.8  | 50   | 2 R.TIQFVDWCPTGFK.V                       |
|               | HsFLAG-TCF3_Ti_1   | 4.0211 | 0.3559 | 1599.41 | 1599.793 | 6154.4                                                          | 1 | 984.8  | 70.8 | 8 R.TIQFVDWCPTGFK.V                       |
|               | HsFLAG-ARP6_Ti_2   | 4.0719 | 0.4153 | 1825.6  | 1826.103 | 3498.4                                                          | 1 | 615.9  | 58.8 | 34 K.VGINYQPPTVVPGLAK.V                   |
|               | HsFLAG-ARP6_Ti_1   | 6.0682 | 0.4321 | 1865.52 | 1866.108 | 10861.7                                                         | 1 | 2782.2 | 75   | 18 R.AVCMLSNTTAIAEAWAR.L                  |
|               | HsFLAG-ARP6_Ti_1   | 4.4765 | 0.3204 | 1867.57 | 1866.108 | 8904.4                                                          | 1 | 1596.3 | 45.3 | 7 R.AVCMLSNTTAIAEAWAR.L                   |
|               | HsFLAG-ARP6_Ti_1   | 3.7547 | 0.214  | 2330.07 | 2331.521 | 8623.8                                                          | 3 | 888.4  | 34.2 | 2 R.AFVHWYVGEEMEEGFSEAR.E                 |
|               | HsFLAG-ARP6_Ti_1   | 4.334  | 0.4395 | 2330.87 | 2331.521 | 6787.1                                                          | 1 | 1352.6 | 57.9 | 3 R.AFVHWYVGEEMEEGFSEAR.E                 |
| gi 4503727 re | 4                  | 9      | 31.20% | 224     | 25177    | 9.3 FK506-binding protein 3 [Homo sapiens]                      |   |        |      |                                           |
| *             | HsFLAG-p53-DNA-D   | 4.4803 | 0.3876 | 1745.48 | 1745.889 | 7949                                                            | 1 | 1643.5 | 75   | 2 K.FLQEHGSDSFLAEHK.L                     |
| *             | HsFLAG-p53-DNA-D   | 4.5417 | 0.4451 | 1688.62 | 1688.88  | 6535.1                                                          | 1 | 1601.2 | 76.9 | 4 K.DHLVTAYNHLFETK.R                      |
| *             | HsFLAG-p53-DNA-D   | 5.1844 | 0.3927 | 3143.54 | 3143.403 | 7508.6                                                          | 1 | 1362.1 | 32.4 | 2 K.KGDVVHCWYTGTLQDGTVFDNIQTSK.K          |
| *             | HsFLAG-Lin9_Ti_20  | 3.9855 | 0.2235 | 1562.42 | 1562.765 | 8869.5                                                          | 1 | 1442.6 | 70.8 | 1 K.ARLEIEPEWAYGK.K                       |
| gi 4826860 re | 4                  | 30     | 31.20% | 128     | 14174    | 8.5 NHP2 non-histone chromosome protein 2-like 1 [Homo sapiens] |   |        |      |                                           |
| gi 51317376 r | 4                  | 30     | 31.20% | 128     | 14174    | 8.5 NHP2 non-histone chromosome protein 2-like 1 [Homo sapiens] |   |        |      |                                           |
|               | HsFlag-NUFIP_Ti_2C | 2.8918 | 0.2857 | 1200.07 | 1200.38  | 3897.2                                                          | 1 | 666.1  | 85   | 3 K.AYPLADAHLTK.K                         |
|               | HsFLAG-p53-DNA-D   | 5.3073 | 0.2419 | 1609.58 | 1609.829 | 7969.3                                                          | 1 | 2338.8 | 87.5 | 17 K.KLLDLVQQSCNYK.Q                      |
|               | HsFlag-NUFIP_Ti_2C | 4.8054 | 0.2836 | 1480.51 | 1481.655 | 7566.6                                                          | 1 | 1605   | 81.8 | 2 K.LLQVQQSCNYK.Q                         |
|               | HsFlag-NUFIP_Ti_2C | 4.7989 | 0.3919 | 1718.5  | 1718.967 | 9050.1                                                          | 1 | 1508.8 | 66.7 | 8 R.ACGVSRPVIACSVTIK.E                    |
| gi 67003578 r | 3                  | 6      | 31.00% | 116     | 13001    | 5 hypothetical protein LOC91750 [Homo sapiens]                  |   |        |      |                                           |
| *             | HsFLAG-Lin9_Ti_20  | 3.5954 | 0.2866 | 2261.21 | 2261.539 | 3826.1                                                          | 1 | 694.3  | 55   | 2 R.ASPDLWPEQLPGVAEFAASF.S                |
| *             | HsFLAG-Lin9_Ti_20  | 4.5682 | 0.4102 | 1677    | 1677.855 | 7690.6                                                          | 1 | 2306.4 | 57.1 | 2 R.GLQNLAYQLGLDESR.E                     |
| *             | HsFLAG-Lin9_Ti_20  | 5.6686 | 0.4672 | 1677.57 | 1677.855 | 8851.3                                                          | 1 | 2203.4 | 78.6 | 2 R.GLQNLAYQLGLDESR.E                     |
| gi 47604944 r | 20                 | 73     | 30.90% | 929     | 103709   | 8.2 SCY1-like 2 protein [Homo sapiens]                          |   |        |      |                                           |
| *             | HsFLAG-Lin9_Ti_20  | 2.9696 | 0.2715 | 1210.33 | 1211.366 | 3539.5                                                          | 1 | 511.5  | 72.7 | 1 R.HIASGGNGLAWK.I                        |
| *             | HsFlag-DPCD_Ti_20  | 2.6301 | 0.1351 | 958.23  | 958.109  | 7560.2                                                          | 1 | 910.2  | 92.9 | 1 K.RGVQQLTR.L                            |
| *             | HsFlag-NUFIP_Ti_2C | 3.6945 | 0.2038 | 1422.1  | 1422.624 | 6113.1                                                          | 1 | 1175.6 | 81.8 | 6 R.LLTVQHPLEESR.D                        |
| *             | HsFLAG-Lin9_Ti_20  | 4.9889 | 0.3791 | 3679.47 | 3677.077 | 7372.1                                                          | 1 | 521.9  | 23.4 | 2 R.DCLAFCTEPVFASLANVLGNWENLPSISPDIK.D    |
| *             | HsFLAG-Lin9_Ti_20  | 4.1218 | 0.3774 | 4083.32 | 4083.516 | 5775.4                                                          | 2 | 344.7  | 18.6 | 1 R.DCLAFCTEPVFASLANVLGNWENLPSISPDIKDYK.L |

|               |                    |        |        |         |          |        |   |        |      |    |                                                                             |
|---------------|--------------------|--------|--------|---------|----------|--------|---|--------|------|----|-----------------------------------------------------------------------------|
| *             | HsFLAG-p53-DNA-D   | 4.8343 | 0.3183 | 1964.86 | 1965.257 | 6806.9 | 1 | 1669.9 | 70.6 | 8  | K.YGLLQVSEGLSFLHSSVK.M                                                      |
| *             | HsFLAG-FLJ20729_   | 4.9162 | 0.3182 | 1965.15 | 1965.257 | 6071.3 | 1 | 1665.4 | 47.1 | 1  | K.YGLLQVSEGLSFLHSSVK.M                                                      |
| *             | HsFLAG-p53-DNA-D   | 4.3221 | 0.3705 | 1693.67 | 1694.002 | 6430.6 | 1 | 1110.8 | 67.9 | 4  | K.MVHGNITPENILNK.S                                                          |
| *             | HsFLAG-p53-DNA-D   | 4.809  | 0.422  | 2012.82 | 2013.36  | 6932.8 | 1 | 1584.9 | 70.6 | 8  | K.LLLNVTPTRPADQMTK.I                                                        |
| *             | HsFLAG-p53-DNA-D   | 5.5757 | 0.2857 | 2493.11 | 2493.821 | 9628.4 | 1 | 1889.5 | 60   | 18 | K.IPFFDDVGAVTLQYFDTLFQR.D                                                   |
| *             | HsFLAG-p53-DNA-D   | 3.9916 | 0.2938 | 2493.56 | 2493.821 | 8732.7 | 1 | 877.1  | 30   | 2  | K.IPFFDDVGAVTLQYFDTLFQR.D                                                   |
| *             | HsFlag-NUFIP_Ti_2C | 3.2746 | 0.1565 | 1226.02 | 1226.545 | 3867.6 | 2 | 709.2  | 80   | 1  | K.LILPELGPVFK.Q                                                             |
| *             | HsFLAG-Lin9_Ti_20  | 3.7796 | 0.3112 | 1711.57 | 1712.086 | 6637.4 | 1 | 969.3  | 69.2 | 4  | K.QQEPIQILLIFLQK.M                                                          |
| *             | HsFLAG-FLJ20729_   | 5.1627 | 0.2996 | 2059.59 | 2060.444 | 4210.4 | 1 | 1079   | 75   | 1  | K.WFVLDDILPFLQQIPSK.E                                                       |
| *             | HsFLAG-FLJ20729_   | 3.7107 | 0.2373 | 2060.24 | 2060.444 | 4605   | 1 | 1056   | 50   | 1  | K.WFVLDDILPFLQQIPSK.E                                                       |
| *             | HsFLAG-Lin9_Ti_20  | 6.394  | 0.3865 | 3078.56 | 3078.625 | 9591.1 | 1 | 1528.7 | 32.7 | 1  | K.VLPHLIPLSIENNLNLNQFNSFISVIK.E                                             |
| *             | HsFlag-NUFIP_Ti_2C | 3.8763 | 0.2821 | 1755.67 | 1755.042 | 8703.5 | 1 | 1234.6 | 69.2 | 1  | K.TKLEQLHIMQEQQK.S                                                          |
| *             | HsFLAG-Lin9_Ti_20  | 4.0711 | 0.2909 | 2692.91 | 2693.884 | 8286.2 | 1 | 694.6  | 39.6 | 2  | K.VFNNIGADLLTGSESENKEDGLQNK.H                                               |
| *             | HsFLAG-p53-DNA-D   | 3.7551 | 0.4131 | 1858.91 | 1859.179 | 5758.4 | 1 | 545.6  | 50   | 8  | K.SQQPLKPVHTPVATVK.Q                                                        |
| *             | HsFLAG-FLJ20729_   | 4.97   | 0.4781 | 2357    | 2357.65  | 11365  | 1 | 1376.7 | 50   | 2  | K.DLTDTLMDNMSLSTLSVSTPK.S                                                   |
| gi 4759156 re |                    | 6      | 8      | 30.90%  | 282      | 31280  |   |        |      |    | 9.8 small nuclear ribonucleoprotein polypeptide A [Homo sapiens]            |
| *             | HsFLAG-Lin9_Ti_20  | 6.5065 | 0.3794 | 2171.67 | 2171.544 | 9213.5 | 1 | 3252.6 | 75   | 1  | K.SLYAIFSQFGQILDILVSR.S                                                     |
| *             | HsFLAG-p53-DNA-D   | 1.82   | 0.1028 | 909.35  | 910.104  | 9474.6 | 8 | 664.6  | 71.4 | 1  | R.GQAFVIFK.E                                                                |
| *             | HsFLAG-p53-DNA-D   | 3.136  | 0.2165 | 1605.04 | 1604.882 | 3787.7 | 1 | 550.6  | 66.7 | 1  | R.SMQGFPFYDKPMR.I                                                           |
| *             | HsFlag-NUFIP_Ti_1C | 4.2514 | 0.5136 | 2728.21 | 2729.188 | 6354.3 | 1 | 690.6  | 37.5 | 1  | K.AVQGGGATPVVGAQQGVPVGMPPMTQAPR.I                                           |
| *             | HsFlag-NUFIP_Ti_11 | 4.3363 | 0.3247 | 2728.5  | 2729.188 | 6928.6 | 1 | 1191.8 | 33.9 | 3  | K.AVQGGGATPVVGAQQGVPVGMPPMTQAPR.I                                           |
| *             | HsFlag-NUFIP_Ti_1C | 2.7718 | 0.3402 | 1990.99 | 1990.139 | 11572  | 1 | 701.6  | 47.1 | 1  | R.HDIAFVEFDNEVQAGAAR.D                                                      |
| gi 62414289 r |                    | 10     | 55     | 30.70%  | 466      | 53652  |   |        |      |    | 5.1 vimentin [Homo sapiens]                                                 |
| *             | HsSrcap_Ti_202.184 | 2.6889 | 0.3017 | 1429.68 | 1429.572 | 4460.4 | 1 | 342.5  | 61.5 | 1  | R.SLYASSPGGVYATR.S                                                          |
| *             | HsFLAG-FLJ20729_   | 5.7262 | 0.5172 | 2127.51 | 2127.356 | 8862.2 | 1 | 2190.9 | 66.7 | 5  | R.LLQDSVDFSLADAINTEFK.N                                                     |
| *             | HsARP6-FLAG_Ti_1   | 3.9579 | 0.1378 | 1170.38 | 1170.435 | 4950.3 | 2 | 1136.4 | 88.9 | 7  | K.ILLAELEQLK.G                                                              |
| *             | HsFLAG-ARP6_Ti_1   | 5.5042 | 0.2926 | 1534.76 | 1534.793 | 7614.2 | 1 | 1964.1 | 83.3 | 10 | R.KVESLQEEIAFLK.K                                                           |
| *             | HsSrcap_Ti_202.206 | 2.4671 | 0.1093 | 1309.47 | 1310.406 | 4889.5 | 4 | 284.9  | 61.1 | 2  | K.NLQEAEEWYK.S                                                              |
| *             | HsFLAG-Lin9_Ti_20  | 3.2248 | 0.2877 | 1490.51 | 1491.648 | 7095.9 | 1 | 584.6  | 62.5 | 1  | R.QVQSLTCEVDALK.G                                                           |
| *             | HsFlag-DPCD_Ti_20  | 3.1021 | 0.2203 | 2188.87 | 2188.33  | 8830.7 | 1 | 871.1  | 47.2 | 1  | R.EMEENFAVEAANYQDTIGR.L                                                     |
| *             | HsFLAG-ARP6_Ti_1   | 3.4401 | 0.3115 | 1572.05 | 1571.86  | 4788.4 | 1 | 613.9  | 65.4 | 25 | R.ISLPLPNFSSSLNLR.E                                                         |
| *             | HsFLAG-ARP6_Ti_1   | 3.3663 | 0.2945 | 1670.44 | 1669.829 | 4163.8 | 1 | 632.6  | 67.9 | 1  | R.ETNLDLPLVDTHSK.R                                                          |
| *             | HsFLAG-Lin9_Ti_20  | 3.4172 | 0.2643 | 1837.34 | 1837.854 | 9044.7 | 1 | 1086.2 | 60   | 2  | R.DGQVINETSQHDDLE.-                                                         |
| gi 88954948 r |                    | 11     | 72     | 30.70%  | 293      | 31435  |   |        |      |    | 10.1 PREDICTED: similar to ribosomal protein S2 isoform 1 [Homo sapiens]    |
| gi 88954974 r |                    | 11     | 72     | 38.60%  | 233      | 25623  |   |        |      |    | 9.7 PREDICTED: similar to ribosomal protein S2 isoform 8 [Homo sapiens]     |
| gi 88954969 r |                    | 11     | 72     | 38.60%  | 233      | 25623  |   |        |      |    | 9.7 PREDICTED: similar to ribosomal protein S2 isoform 7 [Homo sapiens]     |
| gi 88954965 r |                    | 11     | 72     | 40.90%  | 220      | 24156  |   |        |      |    | 9.6 PREDICTED: similar to 40S ribosomal protein S2 isoform 6 [Homo sapiens] |
| *             | HsFlag-NUFIP_Ti_1C | 2.3266 | 0.2989 | 1551.76 | 1552.851 | 8692.8 | 1 | 499.1  | 54.2 | 2  | K.SLEEIYLFSLPIK.E                                                           |
| *             | HsFlag-NUFIP_Ti_1C | 4.7238 | 0.3286 | 1553.49 | 1552.851 | 7279.5 | 1 | 1555.3 | 79.2 | 20 | K.SLEEIYLFSLPIK.E                                                           |
| *             | HsFlag-NUFIP_Ti_1C | 4.6322 | 0.1477 | 1718.33 | 1717.965 | 5982.5 | 1 | 1223   | 68.8 | 20 | K.AFVAIGDYNGHVGLGVK.C                                                       |
| *             | HsFLAG-p53-DNA-D   | 2.7185 | 0.1177 | 1136.75 | 1137.334 | 5462.5 | 3 | 610.7  | 72.2 | 2  | K.IGKPHTVPCK.V                                                              |
| *             | HsFlag-NUFIP_Ti_1C | 2.118  | 0.3256 | 1025.62 | 1026.221 | 7555.2 | 1 | 739.8  | 70   | 1  | R.GTGIVSAPVPK.K                                                             |
| *             | HsFlag-NUFIP_Ti_1C | 2.7662 | 0.2751 | 1847.94 | 1846.133 | 8752.3 | 1 | 659.6  | 53.3 | 1  | K.KLLMMAGIDDCYTSAR.G                                                        |

|                |                    |        |        |         |          |         |   |        |      |                                                                                              |
|----------------|--------------------|--------|--------|---------|----------|---------|---|--------|------|----------------------------------------------------------------------------------------------|
|                | HsFlag-NUFIP_Ti_1C | 3.7738 | 0.3008 | 1719    | 1717.959 | 8689.1  | 1 | 1086.5 | 64.3 | 1 K.LLMMAGIDDCYTSAR.G                                                                        |
|                | HsFLAG-TCF3_Ti_1C  | 2.0447 | 0.2449 | 1386.49 | 1387.575 | 7244.3  | 6 | 375.5  | 50   | 1 K.TSYLTPDLWK.E                                                                             |
|                | HsFLAG-ARP6_Ti_1   | 3.2281 | 0.3305 | 1386.78 | 1387.575 | 6225.5  | 1 | 872.2  | 75   | 6 K.TSYLTPDLWK.E                                                                             |
|                | HsFlag-NUFIP_Ti_1C | 3.641  | 0.3159 | 1464.48 | 1464.618 | 5566.5  | 1 | 1336.9 | 59.1 | 1 K.SPYQEFTDHLVK.T                                                                           |
|                | HsFLAG-ARP6_Ti_1   | 3.9707 | 0.4151 | 1464.63 | 1464.618 | 7813.3  | 1 | 1641.1 | 81.8 | 17 K.SPYQEFTDHLVK.T                                                                          |
| gij 32483377 r | 4                  | 17     | 30.70% | 238     | 25839    |         |   |        |      | 7.5 peroxiredoxin 3 isoform b [Homo sapiens]                                                 |
| gij 5802974 re | 4                  | 17     | 28.50% | 256     | 27693    |         |   |        |      | 7.8 peroxiredoxin 3 isoform a precursor [Homo sapiens]                                       |
|                | HsFLAG-ARP6_Ti_1   | 5.3529 | 0.4914 | 1754.58 | 1755.042 | 7331.3  | 1 | 1667.4 | 68.8 | 2 K.NGGLGHMNIALLSDLTK.Q                                                                      |
|                | HsFLAG-ARP6_Ti_1   | 4.9511 | 0.389  | 1462.09 | 1463.674 | 10227.1 | 1 | 2751.2 | 84.6 | 5 R.DYGVLLLEGSGLALR.G                                                                        |
|                | HsFLAG-p53-DNA-D   | 3.4987 | 0.3651 | 1208.07 | 1207.375 | 5037.4  | 1 | 882.1  | 80   | 6 K.HLSVNDLPVGR.S                                                                            |
|                | HsFLAG-ARP6_Ti_1   | 6.4953 | 0.4398 | 3387.08 | 3387.696 | 6755.8  | 1 | 851.6  | 28.3 | 4 K.AFQYVETHGEVCPANWTPDSPTIKPSPAASK.E                                                        |
| gij 4506685 re | 6                  | 24     | 30.50% | 151     | 17222    |         |   |        |      | 10.5 ribosomal protein S13 [Homo sapiens]                                                    |
| *              | HsFLAG-ARP6_Ti_1   | 2.6998 | 0.2605 | 1092.23 | 1092.24  | 5663.1  | 2 | 532.3  | 72.2 | 1 K.GLSQSALPYR.R                                                                             |
| *              | HsFlag-NUFIP_Ti_11 | 3.8264 | 0.2559 | 1382.45 | 1382.69  | 5086.4  | 1 | 1048   | 79.2 | 10 K.KGLTPSQIGVILR.D                                                                         |
| *              | HsFlag-NUFIP_Ti_11 | 3.6541 | 0.0966 | 1383.14 | 1382.69  | 6193.7  | 2 | 1643.1 | 54.2 | 1 K.KGLTPSQIGVILR.D                                                                          |
| *              | HsFLAG-ARP6_Ti_1   | 3.1198 | 0.27   | 1255.87 | 1254.516 | 5671    | 1 | 711.8  | 72.7 | 3 K.GLTPSQIGVILR.D                                                                           |
| *              | HsFlag-NUFIP_Ti_1C | 3.4221 | 0.3113 | 1694.75 | 1694.968 | 4965.4  | 1 | 679.1  | 67.9 | 8 K.GLAPDLPEDLYHLIK.K                                                                        |
| *              | HsFlag-NUFIP_Ti_11 | 2.5431 | 0.1641 | 1008.81 | 1010.227 | 3136.9  | 1 | 440.8  | 92.9 | 1 K.RVLPPNWK.Y                                                                               |
| gij 14141152 r | 15                 | 121    | 30.40% | 730     | 77516    |         |   |        |      | 8.7 heterogeneous nuclear ribonucleoprotein M isoform a [Homo sapiens]                       |
| *              | HsFlag-DPCD_Ti_20  | 3.0341 | 0.2506 | 1868.3  | 1869.013 | 4531.9  | 1 | 631.1  | 55.3 | 3 K.MEEESGAPGVPSGNGAPGPK.G                                                                   |
|                | HsFLAG-Lin9_Ti_20  | 3.9908 | 0.1035 | 1265.5  | 1265.495 | 5736.4  | 4 | 1053.9 | 80   | 4 R.AFITNIPFDVK.W                                                                            |
|                | HsFLAG-FLJ20729_   | 4.763  | 0.4557 | 1755.55 | 1754.005 | 7306.9  | 1 | 1412.6 | 66.7 | 20 K.VGEVTVVELLMDAEGK.S                                                                      |
|                | HsFLAG-Lin9_Ti_20  | 3.7365 | 0.3153 | 1427.35 | 1427.64  | 5103.8  | 1 | 1041.9 | 79.2 | 15 R.LGSTVFVANLDYK.V                                                                         |
|                | HsYL1_Ti_104.2680. | 5.0772 | 0.499  | 2179.86 | 2179.575 | 4416.4  | 1 | 546.4  | 47.7 | 13 K.GIGMGNIPAGMGMEGIGFGINK.M                                                                |
|                | HsFLAG-ARP6_Ti_1   | 3.7162 | 0.4333 | 1715.34 | 1715.972 | 8013.8  | 1 | 1396.7 | 65.6 | 2 K.MGGMGPFPGGGMENMGR.F                                                                      |
|                | HsFLAG-ARP6_Ti_1   | 3.3665 | 0.1101 | 1115.31 | 1115.315 | 6008.8  | 3 | 1204.1 | 88.9 | 2 R.INEILSNALK.R                                                                             |
|                | HsFLAG-TCF3_Ti_1C  | 2.9756 | 0.2641 | 1286.84 | 1285.359 | 6343.5  | 1 | 572.7  | 60.7 | 2 K.QGGGGGGGSPGIER.M                                                                         |
|                | HsFlag-NUFIP_Ti_2C | 3.8298 | 0.4043 | 1102.14 | 1102.271 | 6207.4  | 1 | 1495.7 | 95   | 8 R.MGAGLGHGMDR.V                                                                            |
|                | HsFlag-VPS71_Ti_1C | 5.0445 | 0.4576 | 1614.57 | 1614.875 | 7122.9  | 1 | 1947.2 | 82.1 | 16 R.MGPLGLDHMASSIER.M                                                                       |
|                | HsFLAG-ARP6_Ti_1   | 3.3774 | 0.353  | 1125.65 | 1126.334 | 5463.2  | 1 | 1193.7 | 90   | 2 R.MGAGMGFGLER.M                                                                            |
|                | HsFLAG-ARP6_Ti_1   | 3.6363 | 0.3546 | 1429.67 | 1428.708 | 4978.6  | 1 | 1033.5 | 75   | 13 R.MGPAMGALGAGIER.M                                                                        |
|                | HsFlag-NUFIP_Ti_11 | 4.781  | 0.3808 | 2035.68 | 2036.173 | 7115.2  | 1 | 1076.5 | 50   | 11 R.GNFGGSGAGSFGGAGGHAPGVAR.K                                                               |
|                | HsFLAG-TCF3_Ti_1C  | 1.9639 | 0.1102 | 1167.52 | 1168.337 | 5513.6  | 5 | 311.9  | 62.5 | 1 R.NLPFDFTWK.M                                                                              |
|                | HsFLAG-ARP6_Ti_1   | 4.8317 | 0.3881 | 1566.16 | 1566.72  | 7132.9  | 1 | 2587.8 | 91.7 | 9 K.FNECGHVLYADIK.M                                                                          |
| gij 88970681 r | 4                  | 6      | 30.40% | 135     | 14926    |         |   |        |      | 8.2 PREDICTED: similar to heterogeneous nuclear ribonucleoprotein K isoform 2 [Homo sapiens] |
|                | HsFlag-VPS71_Ti_1C | 2.0636 | 0.0937 | 729.55  | 729.855  | 4751.3  | 5 | 414.1  | 71.4 | 1 K.NAGAVIGK.G                                                                               |
| *              | HsFLAG-FLJ20729_   | 2.8333 | 0.104  | 1662.57 | 1662.926 | 4411.5  | 1 | 429.4  | 62.5 | 1 K.KIIPTEEYQHYK.G                                                                           |
|                | HsFlag-VPS71_Ti_1C | 3.1261 | 0.2606 | 1099.29 | 1099.108 | 4459.9  | 5 | 727    | 81.2 | 2 K.GSDFDCEL.R.L                                                                             |
|                | HsFlag-VPS71_Ti_1C | 2.976  | 0.1126 | 1333.59 | 1333.484 | 6995.3  | 1 | 634.1  | 75   | 2 K.ELRENTQTTIK.L                                                                            |
| gij 4506715 re | 3                  | 27     | 30.40% | 69      | 7841     |         |   |        |      | 10.7 ribosomal protein S28 [Homo sapiens]                                                    |
| gij 89042507 r | 3                  | 27     | 18.90% | 111     | 12494    |         |   |        |      | 10.4 PREDICTED: similar to 40S ribosomal protein S28 [Homo sapiens]                          |
| gij 89035017 r | 3                  | 27     | 30.40% | 69      | 7841     |         |   |        |      | 10.7 PREDICTED: similar to 40S ribosomal protein S28 [Homo sapiens]                          |
| gij 89034184 r | 3                  | 27     | 30.40% | 69      | 7841     |         |   |        |      | 10.7 PREDICTED: similar to 40S ribosomal protein S28 [Homo sapiens]                          |

|               |                    |        |        |         |          |                                                                                                             |   |        |      |                                         |
|---------------|--------------------|--------|--------|---------|----------|-------------------------------------------------------------------------------------------------------------|---|--------|------|-----------------------------------------|
| gi 88959151 r | 3                  | 27     | 30.40% | 69      | 7841     | 10.7 PREDICTED: similar to 40S ribosomal protein S28 [Homo sapiens]                                         |   |        |      |                                         |
| gi 88953906 r | 3                  | 27     | 30.40% | 69      | 7841     | 10.7 PREDICTED: similar to 40S ribosomal protein S28 [Homo sapiens]                                         |   |        |      |                                         |
|               | HsFlag-NUFIP_Ti_1C | 1.9578 | 0.2089 | 1099.46 | 1100.188 | 4432.6                                                                                                      | 2 | 342.5  | 62.5 | 1 R.VEFMDDTSR.S                         |
|               | HsFlag-NUFIP_Ti_1C | 2.566  | 0.1086 | 1100.3  | 1100.188 | 3757.8                                                                                                      | 3 | 620.7  | 87.5 | 2 R.VEFMDDTSR.S                         |
|               | HsFLAG-ARP6_Ti_1   | 4.2033 | 0.305  | 1360.97 | 1361.492 | 7714.1                                                                                                      | 1 | 1559.1 | 81.8 | 24 R.EGDVLTLESER.E                      |
| gi 4826998 re | 24                 | 203    | 30.30% | 707     | 76150    | 9.4 splicing factor proline/glutamine rich (polypyrimidine tract binding protein associated) [Homo sapiens] |   |        |      |                                         |
| *             | HsFLAG-p53-DNA-D   | 1.99   | 0.1853 | 882.28  | 882.946  | 5835.6                                                                                                      | 1 | 662    | 78.6 | 2 K.ISDSEGFK.A                          |
| *             | HsFLAG-FLJ20729_   | 3.9043 | 0.4204 | 1808.07 | 1809.026 | 3514.7                                                                                                      | 1 | 845.6  | 76.7 | 8 R.LFVGNLPADITEDEFK.R                  |
| *             | HsFLAG-p53-DNA-D   | 3.5028 | 0.2239 | 1966.76 | 1965.213 | 4199.7                                                                                                      | 1 | 671.4  | 62.5 | 2 R.LFVGNLPADITEDEFK.R.L                |
| *             | HsFlag-VPS71_Ti_1C | 2.8505 | 0.3281 | 1252.61 | 1253.397 | 4670.3                                                                                                      | 1 | 435.5  | 60   | 3 K.YGEPGEVFINK.G                       |
| *             | HsFlag-VPS71_Ti_1C | 4.151  | 0.3225 | 1253.75 | 1253.397 | 3358.2                                                                                                      | 1 | 809.4  | 90   | 5 K.YGEPGEVFINK.G                       |
| *             | HsFLAG-p53-DNA-D   | 2.5664 | 0.4197 | 1143.53 | 1144.319 | 5629.1                                                                                                      | 1 | 621    | 75   | 9 R.FATHAAALSVR.N                       |
| *             | HsARP6-FLAG_Ti_1   | 3.4993 | 0.443  | 1144.32 | 1144.319 | 5954.8                                                                                                      | 1 | 1151.6 | 85   | 13 R.FATHAAALSVR.N                      |
| *             | HsFLAG-UTX1_Ti_2   | 5.6627 | 0.4674 | 2640.25 | 2640.909 | 10322.2                                                                                                     | 1 | 1805.8 | 52.3 | 52 R.NLSPYVSNELLEAFSQFGPIER.A           |
| *             | HsFlag-VPS71_Ti_1C | 4.1189 | 0.2123 | 2643.45 | 2640.909 | 7124.3                                                                                                      | 1 | 1080.3 | 34.1 | 1 R.NLSPYVSNELLEAFSQFGPIER.A            |
| *             | HsFlag-VPS71_Ti_1C | 2.2093 | 0.2393 | 886.64  | 887.024  | 5875.5                                                                                                      | 7 | 596.8  | 78.6 | 3 R.AVVIVDDR.G                          |
| *             | HsFLAG-p53-DNA-D   | 2.8244 | 0.2759 | 1245.55 | 1246.452 | 5146                                                                                                        | 3 | 336.7  | 54.5 | 1 K.GIVEFASKPAAR.K                      |
| *             | HsFLAG-FLJ20309_   | 3.1298 | 0.3592 | 1246.58 | 1246.452 | 8598.2                                                                                                      | 1 | 1365.6 | 72.7 | 2 K.GIVEFASKPAAR.K                      |
| *             | HsFlag-VPS71_Ti_1C | 4.7104 | 0.4347 | 1483.1  | 1481.655 | 6886.7                                                                                                      | 1 | 1724   | 87.5 | 2 R.CSEGVFLLTTTPR.P                     |
| *             | HsFlag-DPCD_Ti_20  | 6.803  | 0.3878 | 3599.3  | 3598.992 | 9184.5                                                                                                      | 1 | 1309   | 29   | 29 R.CSEGVFLLTTTPRPVIVEPLEQLDDEDGLPEK.L |
| *             | HsFLAG-p53-DNA-D   | 6.0004 | 0.4467 | 2135.71 | 2136.361 | 4805                                                                                                        | 1 | 1336.6 | 75   | 5 R.PVIVEPLEQLDDEDGLPEK.L               |
| *             | HsFLAG-FLJ20729_   | 4.411  | 0.4574 | 1764.31 | 1763.863 | 7357.8                                                                                                      | 1 | 1166.3 | 69.2 | 6 R.FAQHGTFEYEYSQR.W                    |
| *             | HsFlag-NUFIP_Ti_2C | 4.3111 | 0.3892 | 2428.37 | 2429.623 | 6071.1                                                                                                      | 1 | 784.4  | 36.8 | 2 K.DKLESEMEDAYHEHQANLLR.Q              |
| *             | HsFlag-VPS71_Ti_1C | 5.7419 | 0.4642 | 2428.73 | 2429.623 | 7480.2                                                                                                      | 1 | 1706   | 63.2 | 3 K.DKLESEMEDAYHEHQANLLR.Q              |
| *             | HsFLAG-p53-DNA-D   | 4.4269 | 0.3024 | 1573.43 | 1573.782 | 9875.8                                                                                                      | 1 | 1730   | 81.8 | 10 R.RMEELHNQEMQK.R                     |
| *             | HsFlag-VPS71_Ti_1C | 3.0196 | 0.1888 | 1418.02 | 1417.595 | 8433.9                                                                                                      | 1 | 1299.8 | 85   | 1 R.MEELHNQEMQK.R                       |
| *             | HsFlag-VPS71_Ti_1C | 4.2912 | 0.4615 | 1773.64 | 1772.963 | 5697.5                                                                                                      | 1 | 692    | 52.8 | 5 R.MGGGGAMNMGDPYGGGQK.F                |
| *             | HsFLAG-p53-DNA-D   | 2.917  | 0.29   | 1341.54 | 1342.457 | 4208.2                                                                                                      | 1 | 297.4  | 57.1 | 4 R.FGQGGAGPVGGQGPR.G                   |
| *             | HsFlag-FLJ90652_2  | 4.1451 | 0.3488 | 1342.27 | 1342.457 | 7729.3                                                                                                      | 1 | 1644   | 75   | 33 R.FGQGGAGPVGGQGPR.G                  |
| *             | HsFlag-DPCD_Ti_20  | 2.6433 | 0.3217 | 1120.25 | 1121.256 | 6080                                                                                                        | 1 | 582.3  | 68.2 | 2 R.GMGPGTPAGYGR.G                      |
| gi 66392203 r | 6                  | 11     | 30.30% | 267     | 30137    | 8.9 NME1-NME2 protein [Homo sapiens]                                                                        |   |        |      |                                         |
|               | HsFLAG-p53-DNA-D   | 2.7564 | 0.1325 | 1151.25 | 1150.366 | 8005                                                                                                        | 2 | 1179.8 | 83.3 | 1 K.DRPFFAGLVK.Y                        |
|               | HsFLAG-ARP6_Ti_1   | 4.4463 | 0.3575 | 1787.15 | 1787.041 | 6441.4                                                                                                      | 1 | 868.6  | 59.4 | 6 R.VMLGETNPADSKPGTIR.G                 |
|               | HsFLAG-ARP6_Ti_1   | 2.7383 | 0.1994 | 1176.6  | 1176.404 | 6052.6                                                                                                      | 1 | 776.7  | 72.2 | 1 K.DRPFFPGLVK.Y                        |
|               | HsFLAG-ARP6_Ti_1   | 2.624  | 0.3073 | 2092.81 | 2094.495 | 8056.3                                                                                                      | 2 | 389.4  | 38.9 | 1 K.YMNSGPVVMVWEGLNVVK.T                |
|               | HsFlag-VPS71_Ti_1C | 2.2232 | 0.1557 | 1069.51 | 1070.191 | 3866.3                                                                                                      | 1 | 448.7  | 72.2 | 1 R.NIIHGSDSVK.S                        |
|               | HsFlag-FLJ90652_2  | 2.6675 | 0.1514 | 1897.5  | 1897.178 | 4522.1                                                                                                      | 1 | 255.6  | 50   | 1 K.EISLWFKPEELVDYK.S                   |
| gi 4757834 re | 5                  | 11     | 30.30% | 211     | 23772    | 6.7 BCL2-associated athanogene 2 [Homo sapiens]                                                             |   |        |      |                                         |
| *             | HsFLAG-ARP6_Ti_1   | 4.3644 | 0.2279 | 1329.24 | 1329.536 | 7598.8                                                                                                      | 1 | 1793.2 | 90   | 2 R.LLESLDQLELR.V                       |
| *             | HsFLAG-ARP6_Ti_1   | 4.3282 | 0.3823 | 2059.49 | 2058.375 | 8884.7                                                                                                      | 1 | 813.7  | 53.1 | 3 K.EILLEMHSIQNSQDMR.Q                  |
| *             | HsFLAG-ARP6_Ti_1   | 6.0812 | 0.5095 | 2429.63 | 2430.661 | 6815.6                                                                                                      | 1 | 1876.2 | 45.2 | 3 K.SHLMSLYSACSSEVPHGPVDQK.F            |
| *             | HsFLAG-ARP6_Ti_1   | 4.2431 | 0.4419 | 2430.09 | 2430.661 | 8077.2                                                                                                      | 1 | 1567.7 | 57.1 | 2 K.SHLMSLYSACSSEVPHGPVDQK.F            |
| *             | HsFLAG-ARP6_Ti_1   | 2.6134 | 0.2211 | 1607.9  | 1608.798 | 5472.7                                                                                                      | 2 | 736.3  | 65.4 | 1 K.FQSIVIGCALEDQK.K                    |

|                     |        |        |         |          |        |                                                                          |        |      |    |                                            |
|---------------------|--------|--------|---------|----------|--------|--------------------------------------------------------------------------|--------|------|----|--------------------------------------------|
| gi 5032179 re       | 10     | 17     | 30.10%  | 835      | 88550  | 5.8 tripartite motif-containing 28 protein [Homo sapiens]                |        |      |    |                                            |
| * HsFLAG-ARP6_Ti_1  | 6.4146 | 0.4971 | 3600.21 | 3600.813 | 9727   | 1                                                                        | 1545.4 | 26.4 | 2  | K.RSTAPSAASASASAAAASSPAGGGAEALLELEHCGVCR.E |
| * HsFLAG-TCF3_Ti_1  | 5.2709 | 0.3579 | 4112.79 | 4114.343 | 6986.8 | 1                                                                        | 533.2  | 21.3 | 2  | PVCK.Q                                     |
| * HsFLAG-ARP6_Ti_1  | 4.2842 | 0.3278 | 1520.61 | 1521.629 | 7889.2 | 1                                                                        | 1668.7 | 81.8 | 2  | K.DHQQFLEDAVR.N                            |
| * HsFLAG-ARP6_Ti_1  | 2.8208 | 0.2355 | 1309.19 | 1309.467 | 3590   | 1                                                                        | 595.5  | 83.3 | 1  | K.FQWDLNAWTK.S                             |
| * HsFLAG-p53-DNA-D  | 3.852  | 0.2874 | 2019.82 | 2020.314 | 7206.6 | 1                                                                        | 840    | 55.3 | 1  | K.IVAERPSTNSTGPAPMAPPR.A                   |
| * HsFlag-VPS71_Ti_1 | 3.5158 | 0.2705 | 3559.24 | 3559.713 | 5851.7 | 1                                                                        | 389    | 20.6 | 1  | K.QGSGSSQPMEVQEGYFGSGDDPYSSAEPHVSGVK.R     |
| * HsFLAG-ARP6_Ti_1  | 3.6087 | 0.2324 | 2244.7  | 2244.55  | 7701.6 | 1                                                                        | 1106.7 | 55.3 | 1  | R.VSLERLDLTLTADSQPPVFK.V                   |
| * HsFLAG-ARP6_Ti_1  | 4.2418 | 0.3219 | 1954.25 | 1954.187 | 3088.8 | 1                                                                        | 551.2  | 65.6 | 3  | K.VFPGSTTEDYNLIVIER.G                      |
| * HsFLAG-ARP6_Ti_1  | 4.0545 | 0.4168 | 1850.29 | 1850.931 | 7027.5 | 1                                                                        | 1180.6 | 61.1 | 3  | K.EEDGSLSLDGADSTGVVAK.L                    |
| * HsFLAG-Lin9_Ti_20 | 3.6188 | 0.2319 | 4307.8  | 4307.869 | 7076.1 | 1                                                                        | 381.3  | 18.9 | 1  | R.VLLALFCHPEPCRPLHQLATDSTFSLDQPGGTLTLIR.A  |
| gi 28144916 r       | 9      | 18     | 30.10%  | 246      | 28383  | 8.7 hypothetical protein LOC55957 [Homo sapiens]                         |        |      |    |                                            |
| * HsFLAG-Lin9_Ti_20 | 4.8148 | 0.196  | 1770.92 | 1772.021 | 7430.6 | 1                                                                        | 1872.8 | 51.8 | 1  | K.ARNQLDAVLQCLLEK.S                        |
| * HsFLAG-Lin9_Ti_20 | 4.5435 | 0.2246 | 1772.6  | 1772.021 | 9194.7 | 1                                                                        | 1499.6 | 64.3 | 2  | K.ARNQLDAVLQCLLEK.S                        |
| * HsFLAG-Lin9_Ti_20 | 3.1659 | 0.3054 | 1543.55 | 1544.755 | 7314.5 | 1                                                                        | 599.9  | 58.3 | 2  | R.NQLDAVLQCLLEK.S                          |
| * HsFLAG-Lin9_Ti_20 | 5.1866 | 0.2175 | 1544.4  | 1544.755 | 7118.1 | 1                                                                        | 2020.6 | 87.5 | 4  | R.NQLDAVLQCLLEK.S                          |
| * HsFLAG-Lin9_Ti_20 | 4.339  | 0.4437 | 2110.9  | 2111.325 | 6309   | 1                                                                        | 1359.8 | 67.6 | 3  | R.SVDLAQFSENTPLYPICR.A                     |
| * HsFLAG-Lin9_Ti_20 | 3.5587 | 0.156  | 2111.4  | 2111.325 | 7220.3 | 2                                                                        | 926.2  | 38.2 | 1  | R.SVDLAQFSENTPLYPICR.A                     |
| * HsFLAG-Lin9_Ti_20 | 3.1454 | 0.3369 | 2870.84 | 2871.992 | 6766.5 | 1                                                                        | 381.8  | 34   | 2  | R.ERECSPSSPLPLPEDEEGSEVTNSK.S              |
| * HsFLAG-Lin9_Ti_20 | 4.7504 | 0.4091 | 2871.01 | 2871.992 | 4772.8 | 1                                                                        | 667.7  | 34   | 2  | R.ERECSPSSPLPLPEDEEGSEVTNSK.S              |
| * HsFLAG-Lin9_Ti_20 | 2.5866 | 0.1663 | 1529.16 | 1529.702 | 5344.2 | 3                                                                        | 600.4  | 60.7 | 1  | K.LPPPTPPGPPGDACR.S                        |
| gi 10440560 r       | 2      | 32     | 30.10%  | 136      | 15404  | 11.1 H3 histone family, member I [Homo sapiens]                          |        |      |    |                                            |
| gi 4504295 re       | 2      | 32     | 30.10%  | 136      | 15404  | 11.1 H3 histone family, member K [Homo sapiens]                          |        |      |    |                                            |
| gi 4504291 re       | 2      | 32     | 30.10%  | 136      | 15404  | 11.1 H3 histone family, member H [Homo sapiens]                          |        |      |    |                                            |
| gi 4504289 re       | 2      | 32     | 30.10%  | 136      | 15404  | 11.1 H3 histone family, member F [Homo sapiens]                          |        |      |    |                                            |
| gi 4504287 re       | 2      | 32     | 30.10%  | 136      | 15404  | 11.1 H3 histone family, member D [Homo sapiens]                          |        |      |    |                                            |
| gi 4504285 re       | 2      | 32     | 30.10%  | 136      | 15404  | 11.1 H3 histone family, member C [Homo sapiens]                          |        |      |    |                                            |
| gi 4504281 re       | 2      | 32     | 30.10%  | 136      | 15404  | 11.1 H3 histone family, member A [Homo sapiens]                          |        |      |    |                                            |
| gi 21071021 r       | 2      | 32     | 30.10%  | 136      | 15404  | 11.1 H3 histone family, member B [Homo sapiens]                          |        |      |    |                                            |
| HsFLAG-p53-DNA-D    | 2.6769 | 0.2307 | 1034.28 | 1033.219 | 4212.4 | 4                                                                        | 520    | 81.2 | 3  | R.YRPGTVALR.E                              |
| HsFLAG-ARP6_Ti_1    | 6.0271 | 0.4076 | 3589.51 | 3588.986 | 6964.5 | 1                                                                        | 1309.3 | 30.6 | 29 | R.FQSSAVMALQEACEAYLVGLFEDTNLCAIHAK.R       |
| gi 31742503 r       | 2      | 25     | 30.10%  | 136      | 15388  | 11.3 H3 histone family, member M [Homo sapiens]                          |        |      |    |                                            |
| gi 88943489 r       | 2      | 25     | 30.10%  | 136      | 15388  | 11.3 PREDICTED: similar to CG31613-PA [Homo sapiens]                     |        |      |    |                                            |
| gi 88943485 r       | 2      | 25     | 22.80%  | 180      | 20527  | 10.2 PREDICTED: similar to H3 histone, family 2 isoform 2 [Homo sapiens] |        |      |    |                                            |
| HsFLAG-p53-DNA-D    | 2.6769 | 0.2307 | 1034.28 | 1033.219 | 4212.4 | 4                                                                        | 520    | 81.2 | 3  | R.YRPGTVALR.E                              |
| HsFLAG-p53-DNA-D    | 6.028  | 0.3893 | 3514.79 | 3515.926 | 6193.6 | 1                                                                        | 1018.7 | 29   | 22 | R.FQSSAVMALQEASEAYLVGLFEDTNLCAIHAK.R       |
| gi 4504279 re       | 2      | 46     | 30.10%  | 136      | 15328  | 11.3 H3 histone, family 3A [Homo sapiens]                                |        |      |    |                                            |
| gi 88976633 r       | 2      | 46     | 30.10%  | 136      | 15226  | 11 PREDICTED: similar to H3 histone, family 3B [Homo sapiens]            |        |      |    |                                            |
| gi 4885385 re       | 2      | 46     | 30.10%  | 136      | 15328  | 11.3 H3 histone, family 3B [Homo sapiens]                                |        |      |    |                                            |
| HsFLAG-p53-DNA-D    | 2.6769 | 0.2307 | 1034.28 | 1033.219 | 4212.4 | 4                                                                        | 520    | 81.2 | 3  | R.YRPGTVALR.E                              |
| HsFLAG-p53-DNA-D    | 6.2359 | 0.3312 | 3440.67 | 3439.813 | 5190.8 | 1                                                                        | 958.2  | 29.8 | 43 | R.FQSAAGALQEASEAYLVGLFEDTNLCAIHAK.R        |
| gi 5730085 re       | 2      | 3      | 30.10%  | 113      | 12452  | 5.1 t-complex-associated-testis-expressed 1-like 1 [Homo sapiens]        |        |      |    |                                            |
| * HsFLAG-FLJ20729_  | 3.121  | 0.3675 | 1674.39 | 1675.795 | 5169   | 1                                                                        | 785.7  | 63.3 | 1  | K.EAIESAIGGNAYQHSK.V                       |

|               |                     |        |        |         |          |         |                                                                                                          |        |      |    |                                    |
|---------------|---------------------|--------|--------|---------|----------|---------|----------------------------------------------------------------------------------------------------------|--------|------|----|------------------------------------|
| *             | HsFLAG-p53-DNA-D    | 5.1487 | 0.4171 | 2089.8  | 2090.341 | 7986.4  | 1                                                                                                        | 826.3  | 55.9 | 2  | K.VNQWTTNVVEQTLSQLTK.L             |
| gi 4506699 re | 4                   | 30     | 30.10% | 83      | 9111     | 8.5     | ribosomal protein S21 [Homo sapiens]                                                                     |        |      |    |                                    |
| *             | HsFlag-NUFIP_Ti_1C  | 4.3289 | 0.4386 | 1557.48 | 1557.719 | 8954.4  | 1                                                                                                        | 1974.2 | 80.8 | 25 | K.DHASIQMNVAEVDK.V                 |
| *             | HsFlag-NUFIP_Ti_11  | 2.3055 | 0.3363 | 1557.69 | 1557.719 | 7327    | 1                                                                                                        | 462.7  | 50   | 1  | K.DHASIQMNVAEVDK.V                 |
| *             | HsFlag-NUFIP_Ti_1C  | 3.5081 | 0.3019 | 1280.68 | 1279.411 | 5878.5  | 1                                                                                                        | 842.1  | 75   | 2  | R.RMGESDDSIILR.L                   |
| *             | HsFlag-NUFIP_Ti_1C  | 3.6214 | 0.2971 | 1123.35 | 1123.223 | 6366    | 1                                                                                                        | 1567.8 | 94.4 | 2  | R.MGESDDSIILR.L                    |
| gi 35493811 r | 13                  | 62     | 30.00% | 530     | 59380    | 10.1    | RNA-binding region containing protein 2 isoform a [Homo sapiens]                                         |        |      |    |                                    |
| gi 4757926 re | 13                  | 62     | 30.30% | 524     | 58657    | 10.1    | RNA-binding region containing protein 2 isoform b [Homo sapiens]                                         |        |      |    |                                    |
| gi 35493829 r | 13                  | 62     | 42.60% | 373     | 40541    | 6.3     | RNA-binding region containing protein 2 isoform c [Homo sapiens]                                         |        |      |    |                                    |
| gi 35493822 r | 13                  | 62     | 43.30% | 367     | 39818    | 6.6     | RNA-binding region containing protein 2 isoform d [Homo sapiens]                                         |        |      |    |                                    |
| gi 35493817 r | 13                  | 62     | 42.60% | 373     | 40541    | 6.3     | RNA-binding region containing protein 2 isoform c [Homo sapiens]                                         |        |      |    |                                    |
|               | HsFlag-VPS71_Ti_1C  | 2.2452 | 0.1315 | 1271.55 | 1272.397 | 7516.2  | 1                                                                                                        | 518.2  | 60   | 1  | R.DLEEFFSTVGK.V                    |
|               | HsFlag-VPS71_Ti_1C  | 3.0667 | 0.1704 | 1272.35 | 1272.397 | 7380.2  | 1                                                                                                        | 1607   | 85   | 1  | R.DLEEFFSTVGK.V                    |
|               | HsFLAG-Lin9_Ti_20   | 5.8847 | 0.5014 | 2392.42 | 2392.758 | 8327.9  | 1                                                                                                        | 2341.7 | 44.3 | 4  | K.GIAYVEFVDVSSVPLAIGLTGQR.V        |
|               | HsFLAG-ARP6_Ti_1    | 3.7127 | 0.3607 | 2392.72 | 2392.758 | 4166.3  | 1                                                                                                        | 389.6  | 45.5 | 2  | K.GIAYVEFVDVSSVPLAIGLTGQR.V        |
|               | HsFLAG-Lin9_Ti_20   | 3.3374 | 0.378  | 1551.64 | 1552.855 | 6905.2  | 1                                                                                                        | 1042.4 | 67.9 | 2  | R.VLGVPIIVQASQAEL.N                |
|               | HsFlag-VPS71_Ti_1C  | 4.6031 | 0.428  | 1552.66 | 1552.855 | 3122    | 1                                                                                                        | 965.1  | 85.7 | 15 | R.VLGVPIIVQASQAEL.N                |
|               | HsFLAG-p53-DNA-D    | 2.6372 | 0.3265 | 1908.3  | 1909.21  | 10604.1 | 1                                                                                                        | 784.4  | 50   | 1  | R.LYVGSLSLHFNITEDMLR.G             |
|               | HsFLAG-Lin9_Ti_20   | 3.7222 | 0.3436 | 1581.67 | 1582.673 | 7191.2  | 1                                                                                                        | 1074.8 | 69.2 | 3  | K.GYGFITFSDSECAK.K                 |
|               | HsFlag-NUFIP_Ti_1C  | 4.6828 | 0.2298 | 1776.53 | 1775.076 | 8755    | 1                                                                                                        | 942    | 56.7 | 8  | K.ALEQLNGFELAGRPMK.V               |
|               | HsFlag-DPCD_Ti_20   | 5.2913 | 0.515  | 1831.2  | 1830.857 | 7497.3  | 1                                                                                                        | 1497.3 | 68.8 | 11 | R.TDASSASSFLDSELER.T               |
|               | HsFlag-NUFIP_Ti_11  | 5.6312 | 0.3446 | 1692.76 | 1692.925 | 7470.1  | 1                                                                                                        | 2321.6 | 78.1 | 9  | K.CPSIAAAIAAVNALHGR.W              |
|               | HsFlag-NUFIP_Ti_11  | 5.4069 | 0.3385 | 1693.02 | 1692.925 | 8351.9  | 1                                                                                                        | 2142.5 | 51.6 | 2  | K.CPSIAAAIAAVNALHGR.W              |
|               | HsFlag-NUFIP_Ti_11  | 5.0329 | 0.3463 | 3348.92 | 3349.931 | 5596.8  | 1                                                                                                        | 543.9  | 26.7 | 3  | K.MITAAYVPLPTYHNLFPDSMTATQLLVPSR.R |
| gi 73760405 r | 9                   | 52     | 30.00% | 454     | 50670    | 9.4     | thymopoietin isoform beta [Homo sapiens]                                                                 |        |      |    |                                    |
|               | HsFLAG-KIAA0515_    | 2.5085 | 0.142  | 1700.23 | 1698.874 | 4238.1  | 8                                                                                                        | 409.2  | 53.3 | 1  | K.SELVANNVTLPAGEQR.K               |
|               | HsFLAG-p53-DNA-D    | 4.7959 | 0.3471 | 1719.67 | 1719.981 | 7762.8  | 1                                                                                                        | 1475.9 | 73.1 | 9  | K.DVYVQLYLQHLTAR.N                 |
|               | HsFLAG-UTX1_Ti_2    | 3.7274 | 0.3961 | 1252.53 | 1252.416 | 6178.6  | 1                                                                                                        | 1455   | 81.8 | 21 | R.NRPPLPAGTNSK.G                   |
|               | HsFlag-NUFIP_Ti_2C  | 5.4352 | 0.4378 | 2571.48 | 2571.72  | 7444.5  | 1                                                                                                        | 1550   | 36   | 8  | K.GPPDFSSDEEREPTVLGSGAAAAGR.S      |
|               | HsFLAG-p53-DNA-D    | 4.1052 | 0.2686 | 2688.36 | 2689.887 | 10107.3 | 1                                                                                                        | 620.4  | 34.1 | 1  | R.QEDKDDLDVTELTNEDLLDQLVK.Y        |
|               | HsFlag-les6_293_Ti_ | 4.6388 | 0.3556 | 2190.38 | 2189.378 | 7580    | 1                                                                                                        | 1027.3 | 55.6 | 3  | K.DDLDVTELTNEDLLDQLVK.Y            |
|               | HsARP6-FLAG_Ti_1    | 3.1637 | 0.357  | 1330.97 | 1331.514 | 3923.2  | 1                                                                                                        | 937.3  | 75   | 6  | K.YGVNPGPIVGTTR.K                  |
|               | HsFLAG-FLJ20729_    | 2.5442 | 0.253  | 1647.67 | 1648.767 | 4565.1  | 1                                                                                                        | 1021.1 | 73.3 | 1  | R.SSTPLPTISSSAENTR.Q               |
| *             | HsFLAG-p53-DNA-D    | 3.8296 | 0.2533 | 1793.71 | 1794.06  | 5369.3  | 1                                                                                                        | 597.8  | 56.7 | 2  | K.HASPILPITEFSDIPR.R               |
| gi 21464101 r | 5                   | 16     | 30.00% | 247     | 28303    | 4.9     | tyrosine 3-monooxygenase/tryptophan 5-monooxygenase activation protein, gamma polypeptide [Homo sapiens] |        |      |    |                                    |
| *             | HsFlag-VPS71_Ti_1C  | 3.8428 | 0.2903 | 2237.08 | 2236.534 | 6488.9  | 1                                                                                                        | 1404.6 | 41.7 | 1  | K.ELEAVCQDVLSSLDNYLIK.N            |
| *             | HsFlag-VPS71_Ti_1C  | 5.0578 | 0.4411 | 2237.94 | 2236.534 | 6758.2  | 1                                                                                                        | 1598.3 | 66.7 | 5  | K.ELEAVCQDVLSSLDNYLIK.N            |
| *             | HsFlag-NUFIP_Ti_11  | 4.5024 | 0.2803 | 3014.22 | 3014.373 | 6321    | 1                                                                                                        | 585.1  | 27   | 1  | R.LGLALNYSVFYYEIQNAPEQACHLAK.T     |
| *             | HsFlag-VPS71_Ti_1C  | 5.5011 | 0.5145 | 2133.65 | 2132.242 | 6140.9  | 1                                                                                                        | 1584.4 | 69.4 | 7  | K.TAFDDAIAELDTLNEDSYK.D            |
|               | HsFLAG-FLJ20729_    | 3.7624 | 0.1371 | 1189.5  | 1190.444 | 6163.6  | 5                                                                                                        | 1616.1 | 88.9 | 2  | K.DSTLIMQLLR.D                     |
| gi 12667788 r | 41                  | 132    | 29.80% | 1960    | 226530   | 5.6     | myosin, heavy polypeptide 9, non-muscle [Homo sapiens]                                                   |        |      |    |                                    |
| *             | HsFLAG-Lin9_Ti_20   | 4.6294 | 0.3973 | 1673.41 | 1673.869 | 6947.8  | 1                                                                                                        | 1668.4 | 78.6 | 2  | K.NFINNPLAQADWAAK.K                |
|               | HsFLAG-ARP6_Ti_1    | 4.3483 | 0.3981 | 2286.24 | 2287.556 | 7047.8  | 1                                                                                                        | 714    | 47.4 | 1  | K.VEDMAELTCLNEASVLHNLK.E           |

|               |                    |        |        |         |          |         |                                                                                            |        |      |    |                                |
|---------------|--------------------|--------|--------|---------|----------|---------|--------------------------------------------------------------------------------------------|--------|------|----|--------------------------------|
|               | HsFLAG-Lin9_Ti_20% | 3.8076 | 0.3868 | 2125.48 | 2126.205 | 8110.7  | 1                                                                                          | 708    | 44.7 | 1  | R.EDQSILCTGESGAGKTENTK.K       |
| *             | HsFLAG-ARP6_Ti_1   | 4.5418 | 0.4442 | 1479.5  | 1479.719 | 7111.8  | 1                                                                                          | 1578.7 | 79.2 | 13 | K.VIQYLAYVASSHK.S              |
| *             | HsFLAG-ARP6_Ti_1   | 3.9069 | 0.3458 | 2385.79 | 2386.707 | 6199.5  | 1                                                                                          | 572.3  | 45   | 3  | R.INFDVNGYIVGANIETYLLEK.S      |
| *             | HsFLAG-ARP6_Ti_1   | 4.3698 | 0.431  | 1641.22 | 1641.824 | 4550.2  | 1                                                                                          | 1025.1 | 75   | 6  | R.FLSNGHV TIPGQQDK.D           |
| *             | HsFLAG-ARP8_Ti_1   | 5.0671 | 0.3467 | 1487.47 | 1487.826 | 7530.6  | 1                                                                                          | 2342.9 | 88.5 | 8  | R.VISGVLQLGNIVFK.K             |
| *             | HsFLAG-ARP6_Ti_1   | 3.4316 | 0.3787 | 1615.6  | 1616     | 8617.2  | 2                                                                                          | 756.1  | 57.1 | 2  | R.VISGVLQLGNIVFKK.E            |
|               | HsFLAG-ARP6_Ti_1   | 2.7773 | 0.2777 | 1592.1  | 1592.678 | 3561.8  | 1                                                                                          | 582.7  | 64.3 | 2  | R.NTDQASMPDNTAAQK.V            |
| *             | HsFLAG-ARP6_Ti_1   | 4.1401 | 0.2788 | 1572.34 | 1572.805 | 6559.9  | 1                                                                                          | 1490.5 | 76.9 | 11 | K.VSHLLGINVTDFTR.G             |
| *             | HsFLAG-ARP6_Ti_1   | 3.6056 | 0.2127 | 1573.07 | 1572.805 | 5273.7  | 1                                                                                          | 1147.5 | 55.8 | 1  | K.VSHLLGINVTDFTR.G             |
| *             | HsFLAG-ARP6_Ti_1   | 3.9279 | 0.1225 | 2468.62 | 2468.789 | 8469.2  | 1                                                                                          | 1635.8 | 41.7 | 1  | K.LQQLFNHTMFILEQEYQR.E         |
| *             | HsFlag-FLJ90652_29 | 2.5276 | 0.2003 | 2111.94 | 2111.411 | 10019.4 | 4                                                                                          | 559.9  | 41.7 | 1  | K.PAGPPGILALLDEECWFPK.A        |
| *             | HsFLAG-ARP6_Ti_1   | 3.8076 | 0.3428 | 1296.43 | 1295.447 | 6649.5  | 1                                                                                          | 1344   | 85   | 2  | K.ADFCIIHYAGK.V                |
| *             | HsFlag-VPS71_Ti_10 | 4.8672 | 0.449  | 2020.93 | 2019.364 | 6795    | 1                                                                                          | 1114.6 | 55.3 | 3  | R.IIGLDQVAGMSETALPGAFK.T       |
|               | HsFLAG-BC014022_   | 4.6953 | 0.3416 | 1578.18 | 1575.852 | 3947.8  | 1                                                                                          | 735    | 69.2 | 4  | K.AGKLDPHLVLDQLR.C             |
|               | HsFLAG-Lin9_Ti_20% | 2.6215 | 0.2311 | 1319.1  | 1319.547 | 3341.6  | 1                                                                                          | 429.6  | 75   | 2  | K.LDPHLVLDQLR.C                |
| *             | HsFLAG-ARP6_Ti_1   | 3.0349 | 0.175  | 1559.4  | 1559.806 | 5442.3  | 1                                                                                          | 582.9  | 66.7 | 2  | R.QRYEILTPNSIPK.G              |
|               | HsFLAG-ARP6_Ti_1   | 4.1988 | 0.3798 | 1224.38 | 1224.359 | 6572.6  | 1                                                                                          | 1434.4 | 85   | 2  | R.AGVLAHLEER.D                 |
| *             | HsFLAG-ARP6_Ti_1   | 2.707  | 0.1912 | 1554.02 | 1553.731 | 8257    | 1                                                                                          | 711.4  | 62.5 | 1  | K.ITDVIIGFQACCR.G              |
| *             | HsFLAG-ARP6_Ti_1   | 3.9852 | 0.273  | 1770.49 | 1770.903 | 9984    | 1                                                                                          | 1608.9 | 69.2 | 3  | K.KQELEEICHDLER.V              |
| *             | HsFLAG-ARP6_Ti_1   | 4.8331 | 0.4046 | 1889.26 | 1890.064 | 8109.1  | 1                                                                                          | 1475.6 | 67.9 | 1  | K.KLEEEQIILEDQNCK.L            |
| *             | HsFLAG-Lin9_Ti_20% | 5.0507 | 0.3448 | 2616.22 | 2616.882 | 9036.1  | 1                                                                                          | 1486.8 | 50   | 1  | R.KLEGDSTDLSDQIAELQAQIAELK.M   |
|               | HsFLAG-ARP6_Ti_1   | 3.1298 | 0.1302 | 1258.36 | 1258.417 | 6831.5  | 4                                                                                          | 1016.2 | 80   | 1  | K.KEEELQAALAR.V                |
| *             | HsFLAG-ARP8_Ti_1   | 4.5317 | 0.427  | 2034.89 | 2035.126 | 5625.6  | 1                                                                                          | 1340.6 | 71.9 | 4  | R.ELESQISELQEDLESER.A          |
| *             | HsFLAG-BC014022_   | 5.1663 | 0.4208 | 3017.96 | 3019.243 | 9497.3  | 1                                                                                          | 1341.5 | 29.8 | 7  | R.DLGEELEALKTELEDTLSTAAQQELR.S |
| *             | HsFLAG-ARP6_Ti_1   | 5.6319 | 0.4465 | 1841.02 | 1840.985 | 8176.4  | 1                                                                                          | 2777.5 | 83.3 | 2  | K.HSQAVEELAEQLEQTK.R           |
| *             | HsFLAG-ARP6_Ti_1   | 4.9074 | 0.2596 | 1413.2  | 1413.657 | 7931.4  | 1                                                                                          | 2164.3 | 90.9 | 2  | K.KVEAQLQELQVK.F               |
| *             | HsFLAG-FLJ20729_   | 3.7484 | 0.3549 | 1948.88 | 1947.15  | 9231.5  | 1                                                                                          | 543.6  | 41.2 | 1  | K.LQVELDNVTGLLSQSDSK.S         |
| *             | HsFlag-VPS71_Ti_10 | 5.0882 | 0.2717 | 2493.9  | 2494.631 | 7501.9  | 1                                                                                          | 995.2  | 52.5 | 2  | K.DFSALESQLQDTQELLQEENR.Q      |
| *             | HsFLAG-BC014022_   | 5.2812 | 0.2268 | 2207.92 | 2208.436 | 6887.2  | 1                                                                                          | 2222.6 | 51.5 | 2  | K.TRLQQELDDLVDLDHQR.Q          |
| *             | HsFLAG-ARP6_Ti_1   | 3.7197 | 0.2867 | 1952.25 | 1951.144 | 8912.3  | 1                                                                                          | 783.5  | 50   | 2  | R.LQQELDDLVDLDHQR.Q            |
|               | HsFLAG-Lin9_Ti_20% | 3.416  | 0.1163 | 1220.85 | 1221.396 | 6427.8  | 2                                                                                          | 1186.2 | 83.3 | 2  | K.KFDQLLAEEK.T                 |
| *             | HsFLAG-ARP6_Ti_1   | 3.4576 | 0.2093 | 1361.48 | 1361.556 | 5616.8  | 2                                                                                          | 859.4  | 80   | 1  | K.RALEQQVEEMK.T                |
|               | HsFLAG-ARP6_Ti_1   | 6.8581 | 0.5173 | 1962.21 | 1963.059 | 10191.7 | 1                                                                                          | 3429.4 | 81.2 | 12 | K.TQLEEEDELQATEDAK.L           |
| *             | HsFLAG-ARP6_Ti_1   | 4.3601 | 0.3797 | 1349.14 | 1349.394 | 7782.1  | 1                                                                                          | 1641.7 | 79.2 | 1  | R.DELADEIANSSGK.G              |
| *             | HsFlag-VPS71_Ti_10 | 6.5893 | 0.3644 | 2474.24 | 2473.61  | 9557.5  | 1                                                                                          | 2713.3 | 65   | 8  | R.IAQLLEEEEEEQGNTELINDR.L      |
| *             | HsFLAG-Lin9_Ti_20% | 4.6125 | 0.4088 | 1871.64 | 1871.057 | 6933.4  | 1                                                                                          | 1367.4 | 70   | 2  | K.ANLQIDQINTDLNLER.S           |
| *             | HsFLAG-Lin9_Ti_20% | 4.2187 | 0.2786 | 1531.46 | 1531.66  | 9225.1  | 1                                                                                          | 1672.7 | 75   | 2  | K.IAQLLEEQLDNETK.E             |
| *             | HsFLAG-ARP6_Ti_1   | 3.8266 | 0.1314 | 1488.36 | 1488.554 | 9069.5  | 1                                                                                          | 1407   | 72.7 | 2  | K.RQLEEAEEEAQR.A               |
| *             | HsFLAG-BC014022_   | 3.703  | 0.0856 | 1156.23 | 1156.373 | 6193.5  | 2                                                                                          | 1149.9 | 88.9 | 6  | R.RGDLPFVVR.R                  |
| gi 21735625 r | 6                  | 26     | 29.80% | 245     | 27745    | 4.8     | tyrosine 3/tryptophan 5 -monooxygenase activation protein, zeta polypeptide [Homo sapiens] |        |      |    |                                |
| gi 4507953 re | 6                  | 26     | 29.80% | 245     | 27745    | 4.8     | tyrosine 3/tryptophan 5 -monooxygenase activation protein, zeta polypeptide [Homo sapiens] |        |      |    |                                |
|               | HsH2AZ-FLAG_293_   | 4.6302 | 0.3489 | 1550.08 | 1549.591 | 7406.4  | 1                                                                                          | 1856.9 | 80.8 | 2  | K.SVTEQGAELSNEER.N             |
|               | HsFLAG-ARP6_Ti_1   | 4.1705 | 0.2529 | 1420.28 | 1419.581 | 8018.9  | 1                                                                                          | 2144.9 | 86.4 | 3  | R.DICNDVLSLLEK.F               |

|                |                   |        |        |         |          |                                                  |   |        |      |    |                                     |
|----------------|-------------------|--------|--------|---------|----------|--------------------------------------------------|---|--------|------|----|-------------------------------------|
|                | HsFlag-FLJ90652_2 | 5.9546 | 0.4468 | 2041.92 | 2042.21  | 10329.5                                          | 1 | 2605.9 | 70.6 | 2  | K.GIVDQSQQAYQEAFEISK.K              |
|                | HsFlag-VPS71_Ti_1 | 5.2604 | 0.3881 | 2132.76 | 2133.27  | 6134                                             | 1 | 1616.9 | 69.4 | 13 | K.TAFDEAIAELDTLSEESYK.D             |
|                | HsFlag-FLJ90652_2 | 4.9556 | 0.3922 | 2133.81 | 2133.27  | 8417.6                                           | 1 | 1560.2 | 43.1 | 4  | K.TAFDEAIAELDTLSEESYK.D             |
|                | HsFLAG-FLJ20729_  | 3.7624 | 0.1371 | 1189.5  | 1190.444 | 6163.6                                           | 5 | 1616.1 | 88.9 | 2  | K.DSTLIMQLLR.D                      |
| gij 4506587 re | 2                 | 4      | 29.80% | 121     | 13569    | 5.1 replication protein A3, 14kDa [Homo sapiens] |   |        |      |    |                                     |
| *              | HsFLAG-p53-DNA-D  | 3.8323 | 0.3012 | 2138.37 | 2137.514 | 7046                                             | 5 | 477.2  | 38.9 | 1  | R.INAGMLAQFIDKPVCFVGR.L             |
| *              | HsFlag-NUFIP_Ti_1 | 5.0477 | 0.425  | 2039.5  | 2040.329 | 6062.5                                           | 1 | 1460.8 | 71.9 | 3  | K.IIHDFPQFYPLGIVQHD.-               |
| gij 32996737 r | 13                | 51     | 29.70% | 558     | 63811    | 9.4 lin-9 homolog [Homo sapiens]                 |   |        |      |    |                                     |
| *              | HsFLAG-Lin9_Ti_20 | 2.6368 | 0.1896 | 1609.48 | 1609.693 | 8717                                             | 9 | 628.5  | 54.2 | 1  | R.LFSDEDDRQINTR.S                   |
| *              | HsFLAG-Lin9_Ti_20 | 2.9468 | 0.3523 | 1824.22 | 1824.996 | 7980.5                                           | 1 | 752.1  | 62.5 | 1  | K.WCIYEFWFSNIDK.P                   |
| *              | HsFLAG-Lin9_Ti_20 | 5.5564 | 0.4489 | 2363.79 | 2364.577 | 8126.4                                           | 1 | 2341.6 | 64.3 | 2  | R.GVHDGLFTGQIDAVDTLNATYR.V          |
| *              | HsFLAG-Lin9_Ti_20 | 4.7232 | 0.2661 | 2364.71 | 2364.577 | 9508.8                                           | 1 | 1731.2 | 39.3 | 2  | R.GVHDGLFTGQIDAVDTLNATYR.V          |
| *              | HsFLAG-Lin9_Ti_20 | 6.5631 | 0.4503 | 2757.66 | 2759.137 | 9140.1                                           | 1 | 1962.1 | 39.1 | 4  | R.LHYTPPLQSPIIDNDPLLGGQSPWR.S       |
| *              | HsFLAG-Lin9_Ti_20 | 4.7986 | 0.3754 | 2758.89 | 2759.137 | 6374                                             | 1 | 901.3  | 52.2 | 7  | R.LHYTPPLQSPIIDNDPLLGGQSPWR.S       |
| *              | HsFLAG-Lin9_Ti_20 | 5.3038 | 0.3808 | 2366.58 | 2367.661 | 7857.9                                           | 1 | 1706.9 | 40.5 | 6  | K.ISGSDTETLGGFPVEFLIQVTR.L          |
| *              | HsFLAG-Lin9_Ti_20 | 5.4332 | 0.3978 | 2366.75 | 2367.661 | 5697.5                                           | 1 | 1224.4 | 59.5 | 15 | K.ISGSDTETLGGFPVEFLIQVTR.L          |
| *              | HsFLAG-Lin9_Ti_20 | 3.6424 | 0.3609 | 1458.02 | 1458.672 | 4524.4                                           | 1 | 823.5  | 81.8 | 2  | K.SYMPISIEFQR.R                     |
| *              | HsFLAG-Lin9_Ti_20 | 4.889  | 0.2076 | 1690.2  | 1690.98  | 9638.6                                           | 1 | 2260.2 | 80.8 | 2  | R.RYATIVLELEQLNK.D                  |
| *              | HsFLAG-Lin9_Ti_20 | 5.1317 | 0.2041 | 1534.5  | 1534.793 | 8904.3                                           | 1 | 2279.5 | 87.5 | 6  | R.YATIVLELEQLNK.D                   |
| *              | HsFLAG-Lin9_Ti_20 | 4.0714 | 0.2626 | 2825.83 | 2825.045 | 4752.2                                           | 1 | 557.1  | 43.5 | 2  | K.VQQYCYELAPDQGLQPADQPTDMR.R        |
| *              | HsFLAG-Lin9_Ti_20 | 5.0463 | 0.4115 | 2442.81 | 2443.555 | 6161                                             | 1 | 1089.4 | 54.8 | 1  | R.HANSSTGQPCVENENLTLISR.L           |
| gij 10835067 r | 11                | 65     | 29.70% | 408     | 46837    | 7.1 autoantigen La [Homo sapiens]                |   |        |      |    |                                     |
| *              | HsFlag-NUFIP_Ti_1 | 5.4497 | 0.4566 | 2073.27 | 2073.281 | 9091.2                                           | 1 | 2583   | 76.7 | 8  | K.ICHQIEYYFGDFNLPR.D                |
| *              | HsFlag-NUFIP_Ti_1 | 4.7497 | 0.3623 | 2073.32 | 2073.281 | 7427.7                                           | 1 | 1805.9 | 48.3 | 12 | K.ICHQIEYYFGDFNLPR.D                |
| *              | HsFLAG-ARP6_Ti_1  | 3.7385 | 0.2196 | 1544.23 | 1543.862 | 3912.9                                           | 1 | 750.2  | 79.2 | 2  | K.LDEGWVPLEIMIK.F                   |
| *              | HsFLAG-ARP6_Ti_1  | 4.4448 | 0.3285 | 1550.61 | 1550.792 | 5446.1                                           | 1 | 1111.5 | 76.9 | 17 | R.LTTDFNVIVEALS.S                   |
| *              | HsFlag-NUFIP_Ti_1 | 4.4422 | 0.2972 | 1746.81 | 1746.958 | 9125.6                                           | 1 | 2553.6 | 78.6 | 5  | R.RSPSKPLPEVTDEYK.N                 |
| *              | HsFLAG-ARP6_Ti_1  | 3.9396 | 0.3675 | 1590.1  | 1590.77  | 3510.9                                           | 1 | 741.2  | 76.9 | 1  | R.SPSKPLPEVTDEYK.N                  |
| *              | HsFLAG-ARP6_Ti_1  | 4.224  | 0.3868 | 1500.42 | 1499.704 | 6590.8                                           | 1 | 1062.5 | 69.2 | 7  | K.GSIFVVFDSESIAK.K                  |
| *              | HsFLAG-ARP6_Ti_1  | 3.0313 | 0.1269 | 1034.69 | 1034.2   | 4074.2                                           | 1 | 880.5  | 87.5 | 1  | K.KFVETPGQK.Y                       |
| *              | HsFLAG-ARP6_Ti_1  | 4.3649 | 0.3176 | 1831.64 | 1832.103 | 6344.2                                           | 1 | 804.6  | 57.1 | 9  | K.ETDLLILFKDDYFAK.K                 |
| *              | HsFLAG-ARP6_Ti_1  | 3.7839 | 0.3619 | 1547.71 | 1547.702 | 10127                                            | 1 | 1802.1 | 75   | 2  | K.EVTWEVLEGEVEK.E                   |
| *              | HsFLAG-ARP6_Ti_1  | 4.4832 | 0.1867 | 1445.09 | 1445.613 | 6820.8                                           | 1 | 1624.4 | 86.4 | 1  | K.KIIEDQQESLNK.W                    |
| gij 21536286 r | 7                 | 23     | 29.70% | 381     | 42644    | 5.6 brain creatine kinase [Homo sapiens]         |   |        |      |    |                                     |
| *              | HsFLAG-p53-DNA-D  | 2.9477 | 0.1632 | 1255.07 | 1255.332 | 9226                                             | 4 | 734.7  | 65   | 2  | R.HGGYKPSDEHK.T                     |
| *              | HsFLAG-ARP6_Ti_1  | 3.1695 | 0.1914 | 2294.39 | 2296.513 | 9759.8                                           | 1 | 629.2  | 41.7 | 2  | K.SMTEAEQQQLIDHFLFDK.P              |
| *              | HsFLAG-p53-DNA-D  | 4.7688 | 0.2781 | 3588.3  | 3590.104 | 10507.6                                          | 1 | 961.9  | 23.4 | 1  | K.SMTEAEQQQLIDHFLFDKPVSPLLLASGMAR.D |
| *              | HsFLAG-RPB5MP_2   | 4.0375 | 0.3673 | 1558.22 | 1558.781 | 6667.1                                           | 1 | 1529.3 | 83.3 | 7  | R.FCTGLTQIETLFK.S                   |
| *              | HsFLAG-ARP6_Ti_1  | 3.8253 | 0.3359 | 2955.1  | 2956.311 | 8573.9                                           | 1 | 963.2  | 31.2 | 1  | K.DYEFMWNPHLGYILTCPSNLGTGLR.A       |
| *              | HsFLAG-ARP6_Ti_1  | 4.7289 | 0.299  | 1850.08 | 1850.18  | 7181.4                                           | 1 | 2030.7 | 71.9 | 9  | R.LGFSEVELVQMVVDGVK.L               |
| *              | HsFLAG-FLJ20729_  | 3.2056 | 0.2353 | 1658.65 | 1657.879 | 7189.6                                           | 1 | 1055.7 | 67.9 | 1  | R.LEQQQAIDDLMPAQK.-                 |
| gij 15055539 r | 9                 | 82     | 29.70% | 293     | 31324    | 10.2 ribosomal protein S2 [Homo sapiens]         |   |        |      |    |                                     |
|                | HsFLAG-UTX1_Ti_2  | 5.0805 | 0.2697 | 3686.33 | 3688.293 | 8796.6                                           | 1 | 1045.8 | 26.6 | 2  | K.SLEEIYFLSPLIKESEIIDFFLGASLKDEVK.I |



|               |                     |        |        |         |          |                                                                         |   |        |      |    |                                      |
|---------------|---------------------|--------|--------|---------|----------|-------------------------------------------------------------------------|---|--------|------|----|--------------------------------------|
|               | HsFlag-NUFIP_Ti_1C  | 3.0626 | 0.2662 | 1570.14 | 1569.795 | 9463.4                                                                  | 1 | 965.7  | 61.5 | 7  | K.ESEIIDFFLGASLK.D                   |
|               | HsFlag-NUFIP_Ti_11  | 4.9436 | 0.3844 | 2154.19 | 2154.465 | 7120.9                                                                  | 1 | 1375.2 | 61.1 | 31 | K.ESEIIDFFLGASLKDEVLK.I              |
|               | HsFlag-NUFIP_Ti_1C  | 4.6322 | 0.1477 | 1718.33 | 1717.965 | 5982.5                                                                  | 1 | 1223   | 68.8 | 20 | K.AFVAIGDYNGHVGLGVK.C                |
|               | HsFLAG-p53-DNA-D    | 2.7185 | 0.1177 | 1136.75 | 1137.334 | 5462.5                                                                  | 3 | 610.7  | 72.2 | 2  | K.IGKPHTVPCK.V                       |
|               | HsFlag-NUFIP_Ti_1C  | 2.7662 | 0.2751 | 1847.94 | 1846.133 | 8752.3                                                                  | 1 | 659.6  | 53.3 | 1  | K.KLLMMAGIDDCYTSAR.G                 |
|               | HsFlag-NUFIP_Ti_1C  | 3.7738 | 0.3008 | 1719    | 1717.959 | 8689.1                                                                  | 1 | 1086.5 | 64.3 | 1  | K.LLMMAGIDDCYTSAR.G                  |
|               | HsFlag-NUFIP_Ti_1C  | 3.641  | 0.3159 | 1464.48 | 1464.618 | 5566.5                                                                  | 1 | 1336.9 | 59.1 | 1  | K.SPYQEFTDHLVK.T                     |
|               | HsFLAG-ARP6_Ti_1    | 3.9707 | 0.4151 | 1464.63 | 1464.618 | 7813.3                                                                  | 1 | 1641.1 | 81.8 | 17 | K.SPYQEFTDHLVK.T                     |
| gi 50592996 r | 18                  | 365    | 29.60% | 450     | 50433    | 4.9 tubulin, beta, 4 [Homo sapiens]                                     |   |        |      |    |                                      |
|               | HsFLAG-ARP6_Ti_1    | 4.2213 | 0.2479 | 1617.4  | 1616.87  | 4265.9                                                                  | 1 | 1041.3 | 78.6 | 14 | R.AILVDLEPGTMDSVR.S                  |
|               | HsFLAG-TCF3_Ti_1C   | 7.1819 | 0.4728 | 1959.62 | 1960.151 | 9139.8                                                                  | 1 | 3610.1 | 82.4 | 73 | K.GHYTEGAELVDSVLDVVR.K               |
|               | HsFLAG-ARP6_Ti_1    | 4.9251 | 0.2887 | 1959.94 | 1960.151 | 7005.8                                                                  | 1 | 1288.7 | 41.2 | 34 | K.GHYTEGAELVDSVLDVVR.K               |
|               | HsFLAG-TIP49b_Ti_1  | 5.684  | 0.3213 | 2087.63 | 2088.325 | 8116.7                                                                  | 1 | 2259   | 51.4 | 39 | K.GHYTEGAELVDSVLDVVRK.E              |
|               | HsSrcap_Ti_206.286  | 6.4593 | 0.361  | 2087.84 | 2088.325 | 9352.8                                                                  | 1 | 2739.4 | 72.2 | 25 | K.GHYTEGAELVDSVLDVVRK.E              |
|               | HsFlag-VPS71_Ti_1C  | 2.5434 | 0.1418 | 1319.6  | 1320.59  | 6897.3                                                                  | 9 | 431    | 59.1 | 1  | R.IMNTFSVVPSPK.V                     |
|               | HsFLAG-ARP6_Ti_1    | 4.5585 | 0.3954 | 1320.55 | 1320.59  | 7624                                                                    | 1 | 1689.8 | 86.4 | 26 | R.IMNTFSVVPSPK.V                     |
|               | HsFLAG-ARP6_Ti_1    | 2.1817 | 0.2119 | 1130.19 | 1131.277 | 3484.6                                                                  | 1 | 331.1  | 72.2 | 1  | R.FPQQLNADLR.K                       |
|               | HsFLAG-ARP6_Ti_1    | 3.1035 | 0.1934 | 1133.31 | 1131.277 | 4537.1                                                                  | 1 | 968.3  | 94.4 | 20 | R.FPQQLNADLR.K                       |
|               | HsFLAG-ARP6_Ti_1    | 2.7216 | 0.2275 | 1259.45 | 1259.451 | 6377.3                                                                  | 1 | 1130.1 | 85   | 3  | R.FPQQLNADLRK.L                      |
|               | Hs293Flag-les2_Ti_1 | 4.1115 | 0.2404 | 1271.88 | 1272.594 | 7432.2                                                                  | 1 | 1437.4 | 85   | 9  | R.KLAVNMVFPFR.L                      |
|               | HsFLAG-Lin9_Ti_20   | 3.7432 | 0.2947 | 1144.31 | 1144.42  | 4934.2                                                                  | 1 | 1119.4 | 94.4 | 37 | K.LAVNMVFPFR.L                       |
|               | HsTIP60_Ti_106.282  | 3.611  | 0.2365 | 1693.78 | 1692.968 | 3399.3                                                                  | 1 | 640.9  | 75   | 3  | R.ALTVPELTQQMFDK.N                   |
|               | HsFLAG-ARP6_Ti_1    | 3.1514 | 0.3044 | 1065.99 | 1066.201 | 5998.7                                                                  | 1 | 1325.1 | 87.5 | 4  | K.NMMAACDPR.H                        |
|               | HsFLAG-ARP6_Ti_1    | 4.0978 | 0.3327 | 1699.12 | 1697.888 | 5299.1                                                                  | 1 | 715    | 61.5 | 39 | K.NSSYFVEWIPNNVK.V                   |
| *             | HsFLAG-ARP6_Ti_1    | 5.1249 | 0.4531 | 1875.46 | 1875.147 | 4879.6                                                                  | 1 | 1335.9 | 71.9 | 20 | K.MSSTFIGNSTAIQELFK.R                |
|               | HsFLAG-ARP6_Ti_1    | 4.1879 | 0.3996 | 1386.16 | 1386.612 | 7897.9                                                                  | 1 | 1417.6 | 85   | 10 | K.RISEQFTAMFR.R                      |
|               | HsFLAG-ARP6_Ti_1    | 3.7061 | 0.3498 | 1229.27 | 1230.424 | 8240.8                                                                  | 1 | 1542.7 | 88.9 | 7  | R.ISEQFTAMFR.R                       |
| gi 88947729 r | 10                  | 92     | 29.50% | 275     | 29765    | 9.9 PREDICTED: similar to ribosomal protein S2 isoform 3 [Homo sapiens] |   |        |      |    |                                      |
| gi 88981109 r | 10                  | 92     | 28.90% | 280     | 29883    | 9.6 PREDICTED: similar to ribosomal protein S2 [Homo sapiens]           |   |        |      |    |                                      |
| gi 88976655 r | 10                  | 92     | 28.90% | 280     | 29883    | 9.6 PREDICTED: similar to ribosomal protein S2 [Homo sapiens]           |   |        |      |    |                                      |
|               | HsFlag-NUFIP_Ti_1C  | 2.3266 | 0.2989 | 1551.76 | 1552.851 | 8692.8                                                                  | 1 | 499.1  | 54.2 | 2  | K.SLEEIYLFSLPIK.E                    |
|               | HsFlag-NUFIP_Ti_1C  | 4.7238 | 0.3286 | 1553.49 | 1552.851 | 7279.5                                                                  | 1 | 1555.3 | 79.2 | 20 | K.SLEEIYLFSLPIK.E                    |
|               | HsFLAG-UTX1_Ti_2    | 5.0805 | 0.2697 | 3686.33 | 3688.293 | 8796.6                                                                  | 1 | 1045.8 | 26.6 | 2  | K.SLEEIYLFSLPIKESEIIDFFLGASLKDEVLK.I |
|               | HsFlag-NUFIP_Ti_1C  | 3.0626 | 0.2662 | 1570.14 | 1569.795 | 9463.4                                                                  | 1 | 965.7  | 61.5 | 7  | K.ESEIIDFFLGASLK.D                   |
|               | HsFlag-NUFIP_Ti_11  | 4.9436 | 0.3844 | 2154.19 | 2154.465 | 7120.9                                                                  | 1 | 1375.2 | 61.1 | 31 | K.ESEIIDFFLGASLKDEVLK.I              |
|               | HsFlag-NUFIP_Ti_1C  | 4.6322 | 0.1477 | 1718.33 | 1717.965 | 5982.5                                                                  | 1 | 1223   | 68.8 | 20 | K.AFVAIGDYNGHVGLGVK.C                |
|               | HsFLAG-p53-DNA-D    | 2.7185 | 0.1177 | 1136.75 | 1137.334 | 5462.5                                                                  | 3 | 610.7  | 72.2 | 2  | K.IGKPHTVPCK.V                       |
|               | HsFlag-NUFIP_Ti_1C  | 2.118  | 0.3256 | 1025.62 | 1026.221 | 7555.2                                                                  | 1 | 739.8  | 70   | 1  | R.GTGIVSAPVPK.K                      |
|               | HsFLAG-TCF3_Ti_1C   | 2.0447 | 0.2449 | 1386.49 | 1387.575 | 7244.3                                                                  | 6 | 375.5  | 50   | 1  | K.TYSYLTPDLWK.E                      |
|               | HsFLAG-ARP6_Ti_1    | 3.2281 | 0.3305 | 1386.78 | 1387.575 | 6225.5                                                                  | 1 | 872.2  | 75   | 6  | K.TYSYLTPDLWK.E                      |
| gi 15431288 r | 7                   | 25     | 29.50% | 217     | 24831    | 9.9 ribosomal protein L10a [Homo sapiens]                               |   |        |      |    |                                      |
| *             | HsFLAG-TCF3_Ti_1C   | 4.278  | 0.4128 | 1893.48 | 1893.98  | 5896.7                                                                  | 1 | 929.7  | 63.3 | 6  | K.FSVCVLGDQQHCDEAK.A                 |
|               | HsFLAG-ARP6_Ti_1    | 3.6821 | 0.3099 | 1451.75 | 1452.709 | 3332.1                                                                  | 1 | 599.9  | 75   | 3  | K.AVDIPHMDIEALK.K                    |

|                |                     |        |        |         |          |                                                            |   |        |      |                                        |
|----------------|---------------------|--------|--------|---------|----------|------------------------------------------------------------|---|--------|------|----------------------------------------|
|                | HsFLAG-TCF3_Ti_10   | 3.2863 | 0.3849 | 1452.57 | 1452.709 | 4736.4                                                     | 1 | 653.1  | 62.5 | 1 K.AVDIPHMDIEALK.K                    |
| *              | HsFLAG-TCF3_Ti_10   | 2.6306 | 0.3626 | 1484.51 | 1485.72  | 5109.6                                                     | 1 | 645.5  | 62.5 | 1 K.KYDAFLASESLIK.Q                    |
| *              | HsFLAG-p53-DNA-D    | 4.9719 | 0.3862 | 1485.04 | 1485.72  | 8882.3                                                     | 1 | 2007.7 | 83.3 | 9 K.KYDAFLASESLIK.Q                    |
| *              | HsFLAG-ARP6_Ti_10   | 2.3659 | 0.1078 | 811.47  | 812      | 4900.2                                                     | 1 | 644.5  | 85.7 | 4 R.ILGPGLNK.A                         |
| *              | HsFlag-NUFIP_Ti_10  | 4.5888 | 0.381  | 1601.51 | 1601.861 | 8613.4                                                     | 1 | 1672.4 | 73.1 | 1 K.FPSLLTHNENMVAK.V                   |
| gij 13376798 r | 15                  | 38     | 29.40% | 721     | 79136    | 6.7 hypothetical protein LOC80304 [Homo sapiens]           |   |        |      |                                        |
| *              | HsFLAG-TIP49a_Ti_10 | 3.5811 | 0.3199 | 3437.21 | 3437.849 | 4789.1                                                     | 1 | 515.9  | 26.7 | 1 K.VIGQFECVCGLSWAPPVADDTPVLLAVQHEK.H  |
| *              | HsFLAG-TIP49a_Ti_10 | 4.8946 | 0.4468 | 1886.57 | 1887.127 | 6499.3                                                     | 1 | 2102.5 | 80   | 5 K.HVTVWQLCPSPMESSK.W                 |
| *              | HsFLAG-TIP49b_Ti_10 | 2.9571 | 0.2943 | 1690.51 | 1689.964 | 3563.3                                                     | 5 | 313.9  | 53.6 | 3 R.GSLPILPQGCVWHPK.C                  |
| *              | HsFLAG-TIP49b_Ti_10 | 3.7469 | 0.4164 | 1517.11 | 1517.617 | 6285                                                       | 1 | 1025.5 | 77.3 | 1 R.IHCACWTQDGLR.L                     |
| *              | HsFLAG-TIP49a_Ti_10 | 5.3902 | 0.5167 | 3615.81 | 3616.833 | 6941.6                                                     | 1 | 1157.7 | 27.4 | 1 K.EATDSETNSEVSVSSSYLEPLDLTHIHFNQHK.S |
| *              | HsFLAG-TIP49b_Ti_10 | 4.538  | 0.3863 | 1816.56 | 1817.018 | 6190.5                                                     | 1 | 1184.1 | 71.4 | 2 K.KLIESLSPDFCHQNK.G                  |
| *              | HsFLAG-TIP49a_Ti_10 | 3.813  | 0.3135 | 1688.58 | 1688.844 | 4316.4                                                     | 1 | 517.5  | 61.5 | 3 K.LIESLSPDFCHQNK.G                   |
| *              | HsFLAG-TIP49a_Ti_10 | 4.5919 | 0.3693 | 3053.42 | 3053.359 | 6214.7                                                     | 1 | 775.3  | 39.3 | 1 K.EIQSPLSSICDGSIALDAEPVTQPASLPR.H    |
| *              | HsFLAG-TIP49b_Ti_10 | 2.5236 | 0.3372 | 1661.74 | 1662.756 | 9012.3                                                     | 1 | 625.9  | 50   | 1 R.HSSTPDHTSTLEPPR.L                  |
| *              | HsFLAG-TIP49b_Ti_10 | 3.189  | 0.3188 | 2157    | 2157.351 | 7586.7                                                     | 1 | 610    | 44.4 | 1 R.HSSTPDHTSTLEPPRLPQR.K              |
| *              | HsFLAG-TIP49a_Ti_10 | 4.5597 | 0.4233 | 2338.75 | 2338.665 | 6828.9                                                     | 1 | 1586.3 | 65.8 | 6 K.SSSVYPLSQDLPYVHIYQK.P              |
| *              | HsFLAG-TIP49b_Ti_10 | 3.3205 | 0.1626 | 1032.21 | 1032.194 | 5145.2                                                     | 1 | 745    | 87.5 | 4 K.RAVLLCDGK.L                        |
| *              | HsFLAG-TIP49a_Ti_10 | 2.3727 | 0.3092 | 1418.33 | 1419.534 | 4750.3                                                     | 1 | 608    | 61.5 | 2 R.DSFSPGAVSSLK.V                     |
| *              | HsFLAG-TIP49a_Ti_10 | 3.6366 | 0.3292 | 1419.47 | 1419.534 | 5254                                                       | 1 | 1096   | 73.1 | 6 R.DSFSPGAVSSLK.V                     |
| *              | HsFLAG-TIP49a_Ti_10 | 3.6447 | 0.1502 | 1420.47 | 1419.534 | 3975.2                                                     | 1 | 1090   | 50   | 1 R.DSFSPGAVSSLK.V                     |
| gij 28882049 r | 5                   | 8      | 29.10% | 320     | 35244    | 5.5 replication factor C 2 (40kD) isoform 2 [Homo sapiens] |   |        |      |                                        |
| gij 31563534 r | 5                   | 8      | 26.30% | 354     | 39157    | 6.4 replication factor C 2 (40kD) isoform 1 [Homo sapiens] |   |        |      |                                        |
|                | HsFlag-VPS71_Ti_10  | 4.8491 | 0.3074 | 1641.87 | 1641.824 | 7392.6                                                     | 1 | 1744.4 | 78.6 | 2 K.APGSAGHYELPWVEK.Y                  |
|                | HsFLAG-Lin9_Ti_20   | 3.791  | 0.2708 | 1634.88 | 1634.873 | 5383.5                                                     | 2 | 606.2  | 53.1 | 3 R.EGNVFNIIIAGPPGTGK.T                |
|                | HsFLAG-Lin9_Ti_20   | 2.5792 | 0.1565 | 2565.95 | 2563.829 | 11724.2                                                    | 2 | 377.5  | 27.3 | 1 R.QALNNLQSTFSGFGFINSENVFK.V          |
|                | HsFLAG-Lin9_Ti_20   | 4.3778 | 0.3391 | 2465.49 | 2465.86  | 8696.4                                                     | 1 | 992.4  | 47.5 | 1 K.ILAHLWHLGYSPEDIIGNIFR.V            |
|                | HsFLAG-FLJ20729_1   | 3.1863 | 0.3257 | 1756.31 | 1757.101 | 10557.7                                                    | 1 | 1507.3 | 59.4 | 1 K.IAEGVNSLLQMAGLLAR.L                |
| gij 12025678 r | 18                  | 72     | 29.00% | 911     | 104854   | 5.4 actinin, alpha 4 [Homo sapiens]                        |   |        |      |                                        |
|                | HsFLAG-ARP6_Ti_10   | 3.2973 | 0.3143 | 1392.39 | 1393.511 | 7905.9                                                     | 1 | 1434.5 | 85   | 3 K.TFTAWCNSHLR.K                      |
| *              | HsFLAG-p53-DNA-D    | 3.8131 | 0.1304 | 2094.64 | 2094.564 | 6579.7                                                     | 8 | 1083   | 39.7 | 1 K.LMLLLEVISGERLPKPER.G               |
| *              | HsFLAG-ARP6_Ti_10   | 4.1101 | 0.3682 | 1485.92 | 1486.673 | 8357.5                                                     | 1 | 1858.8 | 81.8 | 3 K.NVNVQNFHISWK.D                     |
|                | HsFLAG-p53-DNA-D    | 3.8606 | 0.3388 | 1227.36 | 1227.409 | 9249.4                                                     | 2 | 1758.7 | 85   | 5 K.DGLAFNALIHR.H                      |
| *              | HsFLAG-FLJ20729_1   | 3.7047 | 0.2019 | 1777.13 | 1776.897 | 11174.4                                                    | 1 | 1346.4 | 63.3 | 3 K.DDPVTNLNNAFEVAEK.Y                 |
|                | HsFLAG-FLJ20729_1   | 3.9341 | 0.4516 | 2007.79 | 2009.287 | 7496.6                                                     | 1 | 1006   | 55.9 | 4 K.AIMTYVSSFYHAFSGAQK.A               |
|                | HsFLAG-p53-DNA-D    | 3.8305 | 0.2522 | 1216.95 | 1216.423 | 7573.3                                                     | 1 | 1642.6 | 94.4 | 1 K.LASDLLEWIR.R                       |
| *              | HsFLAG-p53-DNA-D    | 2.9305 | 0.1524 | 1482.57 | 1482.723 | 3679.1                                                     | 5 | 328.9  | 63.6 | 1 R.TIPWLEDVVPQK.T                     |
|                | HsFLAG-p53-DNA-D    | 4.1643 | 0.2635 | 1422.27 | 1422.58  | 8347.1                                                     | 1 | 1715   | 85   | 2 K.GYEEWLLNEIR.R                      |
| *              | HsFLAG-Lin9_Ti_20   | 3.78   | 0.31   | 1760.12 | 1759.882 | 9766.6                                                     | 1 | 1529.4 | 67.9 | 2 K.ICDQWDALGSLTHSR.R                  |
| *              | HsFLAG-p53-DNA-D    | 4.5407 | 0.4627 | 1920.05 | 1921.158 | 7732.8                                                     | 1 | 1215   | 58.8 | 4 K.LSGSNPYTTVTPQIINSK.W               |
| *              | HsFLAG-Lin9_Ti_20   | 2.9807 | 0.1785 | 1327.66 | 1326.452 | 5690.9                                                     | 1 | 741.8  | 80   | 1 K.RDHALLEEQSK.Q                      |
| *              | HsFLAG-p53-DNA-D    | 4.3204 | 0.4115 | 1774.55 | 1775.017 | 5825.8                                                     | 1 | 527.7  | 53.3 | 4 R.QFASQANVVGPIWQTK.M                 |
| *              | HsFLAG-p53-DNA-D    | 6.4581 | 0.4839 | 3324.99 | 3326.774 | 7199                                                       | 1 | 1027.9 | 29.6 | 8 R.SIVDYKPNLDLLEQQHQLIQEALIFDNK.H     |

|                |                    |        |        |         |          |                                                                      |   |        |      |    |                                        |
|----------------|--------------------|--------|--------|---------|----------|----------------------------------------------------------------------|---|--------|------|----|----------------------------------------|
|                | HsFLAG-Lin9_Ti_20  | 4.3758 | 0.2651 | 1387.59 | 1387.622 | 9291.5                                                               | 1 | 1782.9 | 81.8 | 18 | R.VGWEQLLTTIAR.T                       |
|                | HsFLAG-p53-DNA-D   | 3.8681 | 0.3006 | 1430.49 | 1430.601 | 7341.8                                                               | 1 | 1291   | 81.8 | 1  | R.TINEVENQILTR.D                       |
| *              | HsFLAG-p53-DNA-D   | 4.7342 | 0.4433 | 1742.33 | 1742.834 | 9255.5                                                               | 1 | 1652.2 | 66.7 | 8  | R.ETTDTDADQVIASFK.V                    |
| *              | HsFLAG-FLJ20729_   | 3.6005 | 0.3151 | 1794.13 | 1794.032 | 5659.7                                                               | 1 | 741.9  | 62.5 | 3  | R.MAPYQGPDAVPGALDYK.S                  |
| gij 23503295 r | 4                  | 15     | 28.80% | 215     | 24942    | 5.6 casein kinase 2, beta polypeptide [Homo sapiens]                 |   |        |      |    |                                        |
| *              | HsFlag-FLJ90652_2  | 4.396  | 0.4174 | 2007.37 | 2009.056 | 8007.5                                                               | 1 | 1468.6 | 66.7 | 5  | R.GNEFFCEVDEDIYQDK.F                   |
| *              | HsFlag-VPS71_Ti_1  | 3.9783 | 0.3627 | 1688.85 | 1688.883 | 4450.6                                                               | 1 | 595.6  | 61.5 | 8  | K.FNLTGLNEQVPHYR.Q                     |
| *              | HsFlag-FLJ90652_2  | 3.1355 | 0.1964 | 2563.53 | 2562.965 | 5648.5                                                               | 1 | 411.8  | 38.6 | 1  | R.VYCENQPMLPIGLSDIPGEAMVK.L            |
| *              | HsFLAG-FLJ20729_   | 3.0875 | 0.1863 | 1085.1  | 1085.254 | 6436.1                                                               | 2 | 963.4  | 93.8 | 1  | K.RPANQFVPR.L                          |
| gij 17105394 r | 4                  | 19     | 28.80% | 156     | 17695    | 10.4 ribosomal protein L23a [Homo sapiens]                           |   |        |      |    |                                        |
| gij 89057257 r | 4                  | 19     | 29.00% | 155     | 17662    | 10.4 PREDICTED: similar to 60S ribosomal protein L23a [Homo sapiens] |   |        |      |    |                                        |
| gij 42662048 r | 4                  | 19     | 29.00% | 155     | 17662    | 10.4 PREDICTED: similar to 60S ribosomal protein L23a [Homo sapiens] |   |        |      |    |                                        |
|                | HsFLAG-p53-DNA-D   | 2.5907 | 0.2465 | 1108.51 | 1109.268 | 7567.5                                                               | 1 | 812.6  | 70   | 1  | K.EAPAPPKAEAK.A                        |
|                | HsFLAG-ARP6_Ti_1   | 3.0594 | 0.0817 | 973.1   | 973.16   | 6484.4                                                               | 8 | 1172   | 92.9 | 1  | K.LDHYAIIK.F                           |
|                | HsFlag-NUFIP_Ti_11 | 3.0603 | 0.1562 | 1749.37 | 1748.029 | 9456.3                                                               | 1 | 1055.2 | 60.7 | 4  | K.KIEDNNTLVFIVDVK.A                    |
|                | HsFLAG-ARP6_Ti_1   | 3.8137 | 0.2535 | 1243.37 | 1242.418 | 6728.3                                                               | 5 | 943.7  | 75   | 13 | K.VNTLIRPDGEK.K                        |
| gij 24234750 r | 15                 | 28     | 28.60% | 894     | 95339    | 8.8 interleukin enhancer binding factor 3 isoform a [Homo sapiens]   |   |        |      |    |                                        |
|                | HsFLAG-p53-DNA-D   | 4.9785 | 0.3355 | 2672.32 | 2672.886 | 8722.3                                                               | 2 | 993.3  | 31.8 | 5  | K.HSSVYPTQEELEAVQNMVSHTER.A            |
|                | HsFLAG-Lin9_Ti_20  | 4.5489 | 0.251  | 1389.13 | 1388.61  | 8620.1                                                               | 1 | 1959.6 | 81.8 | 2  | K.GDLDLELVLLCK.E                       |
|                | HsFLAG-ARP6_Ti_1   | 2.6646 | 0.2087 | 1760.83 | 1760.087 | 6856.2                                                               | 3 | 464.9  | 46.7 | 1  | K.EPPLSLTIHLTSPVVR.E                   |
|                | HsFlag-DPCD_Ti_20  | 4.4375 | 0.4439 | 1910.45 | 1911.119 | 5474.4                                                               | 1 | 905    | 61.8 | 4  | K.VLAGETLSVNDPPDVLDR.Q                 |
|                | HsFLAG-p53-DNA-D   | 3.7266 | 0.2137 | 1601.08 | 1601.821 | 7002.9                                                               | 1 | 716.2  | 60   | 3  | K.SIGTANRPMGAGEALR.R                   |
|                | HsFlag-VPS71_Ti_1  | 3.8493 | 0.5107 | 2512.62 | 2511.779 | 5562                                                                 | 1 | 823.4  | 52.3 | 1  | R.VLECLASGIVMPDGGSGIYDPCEK.E           |
|                | HsFLAG-Lin9_Ti_20  | 2.8367 | 0.1287 | 1302.19 | 1302.56  | 5057                                                                 | 6 | 603    | 75   | 1  | R.LNQLKPGLQYK.L                        |
|                | HsFLAG-p53-DNA-D   | 4.1644 | 0.2193 | 3317.78 | 3318.726 | 10731.7                                                              | 1 | 800.6  | 23.4 | 1  | K.LVSQTGPVHAPIFTMSVEVDGNSFEASGPSKK.T   |
|                | HsFLAG-FLJ20729_   | 3.5325 | 0.2583 | 1444.53 | 1444.646 | 5050.3                                                               | 1 | 709.8  | 65.4 | 1  | K.VLQDMGLPTGAEGR.D                     |
|                | HsFLAG-Lin9_Ti_20  | 3.5628 | 0.3446 | 1435.93 | 1436.518 | 5269.2                                                               | 2 | 829.9  | 70.8 | 1  | K.YELISETGGSHDK.R                      |
|                | HsFLAG-Lin9_Ti_20  | 3.0347 | 0.2429 | 1436.72 | 1436.518 | 6065.3                                                               | 2 | 519.9  | 58.3 | 1  | K.YELISETGGSHDK.R                      |
|                | HsFLAG-Lin9_Ti_20  | 2.8883 | 0.3412 | 1414.42 | 1415.629 | 3656.1                                                               | 1 | 601.2  | 75   | 1  | K.LFPDTPALDANK.K                       |
| *              | HsFLAG-Lin9_Ti_20  | 4.9938 | 0.2924 | 3254.31 | 3255.224 | 8779.2                                                               | 1 | 1530.8 | 30.8 | 1  | K.GYNHGQGSYSYSNSYNPPGGGGSDYNYESK.F     |
| *              | HsFLAG-Lin9_Ti_20  | 3.9319 | 0.4471 | 3012.79 | 3013.98  | 5575.1                                                               | 1 | 567.7  | 33.3 | 1  | R.SGGNSYSGGASYNPGSHGGYGGGSGGGSSYQGGK.Q |
| *              | HsFLAG-FLJ20309_   | 4.5575 | 0.3727 | 3014.72 | 3013.98  | 6254.3                                                               | 1 | 1053.1 | 29.5 | 4  | R.SGGNSYSGGASYNPGSHGGYGGGSGGGSSYQGGK.Q |
| gij 5174449 re | 11                 | 76     | 28.60% | 213     | 22487    | 10.8 H1 histone family, member X [Homo sapiens]                      |   |        |      |    |                                        |
| *              | HsFLAG-p53-DNA-D   | 2.2447 | 0.2539 | 945.41  | 946.048  | 5382.5                                                               | 1 | 468.5  | 65   | 2  | K.AGGSAAALSPSK.K                       |
| *              | HsFLAG-p53-DNA-D   | 2.604  | 0.2144 | 1073.51 | 1074.222 | 7617.9                                                               | 8 | 539.4  | 59.1 | 1  | K.AGGSAAALSPSK.R                       |
| *              | HsFLAG-ARP6_Ti_1   | 3.9093 | 0.3762 | 1210.11 | 1208.4   | 5679.4                                                               | 1 | 1230   | 88.9 | 3  | K.YSQLVVETIR.R                         |
| *              | HsFLAG-ARP6_Ti_1   | 2.8366 | 0.2421 | 1364.02 | 1364.588 | 6687.3                                                               | 1 | 816.2  | 75   | 1  | K.YSQLVVETIRR.L                        |
| *              | HsFLAG-ARP6_Ti_1   | 3.0976 | 0.2265 | 1247.22 | 1247.356 | 5679.6                                                               | 1 | 1047.2 | 88.9 | 1  | K.VPWFDDQNGR.T                         |
| *              | HsFLAG-ARP6_Ti_1   | 4.0999 | 0.2668 | 1343.21 | 1342.578 | 7412.5                                                               | 1 | 1522.6 | 81.8 | 5  | K.ALVQNDTLLQVK.G                       |
| *              | HsFLAG-p53-DNA-D   | 3.6651 | 0.3187 | 1488.7  | 1488.69  | 3590                                                                 | 1 | 729.8  | 48.3 | 2  | R.RGAPAAATAPAPTAHK.A                   |
| *              | HsFlag-NUFIP_Ti_11 | 3.8219 | 0.3753 | 1488.71 | 1488.69  | 6467.6                                                               | 1 | 1610.5 | 80   | 14 | R.RGAPAAATAPAPTAHK.A                   |
| *              | HsFlag-NUFIP_Ti_11 | 3.1306 | 0.261  | 1488.82 | 1488.69  | 4145.7                                                               | 4 | 260    | 53.3 | 1  | R.RGAPAAATAPAPTAHK.A                   |
| *              | HsFlag-NUFIP_Ti_1  | 2.6303 | 0.263  | 1331.68 | 1332.502 | 5578.7                                                               | 1 | 370    | 46.4 | 1  | R.GAPAAATAPAPTAHK.A                    |

|             |                     |        |        |         |          |         |   |        |      |    |                                                                                                               |
|-------------|---------------------|--------|--------|---------|----------|---------|---|--------|------|----|---------------------------------------------------------------------------------------------------------------|
| *           | HsFLAG-p53-DNA-D    | 4.3704 | 0.3122 | 1332.17 | 1332.502 | 4746    | 2 | 957.8  | 75   | 45 | R.GAPAAATAPAPTAHK.A                                                                                           |
| gi 13376840 | r                   | 4      | 16     | 28.50%  | 305      | 33581   |   |        |      |    | 5.5 WD repeat domain 61 [Homo sapiens]                                                                        |
| *           | HsFLAG-p53-DNA-D    | 4.216  | 0.3966 | 3006.92 | 3006.298 | 7312.2  | 1 | 793    | 26.8 | 1  | K.SIDAGPVDAWTLAFSPDSQYLATGTHVGK.V                                                                             |
| *           | HsFLAG-FLJ20309_    | 5.4244 | 0.3926 | 2052.75 | 2053.363 | 7092.8  | 1 | 1451.1 | 60.5 | 13 | K.YLASGAIDGIINIFDIATGK.L                                                                                      |
| *           | HsFLAG-Lin9_Ti_20   | 2.7617 | 0.2676 | 2258.26 | 2258.487 | 9316.2  | 4 | 389.1  | 32.5 | 1  | R.SLTFSPDSQLLVTTASDDGYIK.I                                                                                    |
| *           | HsFLAG-p53-DNA-D    | 5.3233 | 0.4661 | 2105.79 | 2105.283 | 9622.5  | 1 | 1545   | 62.5 | 1  | R.TCVHTFFDHDQVWGVK.Y                                                                                          |
| gi 89036252 | r                   | 7      | 58     | 28.50%  | 295      | 32744   |   |        |      |    | 4.5 PREDICTED: similar to 40S ribosomal protein SA (p40) (34/67 kDa laminin receptor) (Colon carcinoma lamini |
|             | HsFlag-NUFIP_Ti_1C  | 3.2111 | 0.1384 | 1136.52 | 1136.334 | 3726.7  | 3 | 871.1  | 83.3 | 9  | K.SDGIYIINLK.R                                                                                                |
|             | HsFlag-NUFIP_Ti_1C  | 4.2588 | 0.3692 | 1204.09 | 1204.371 | 8028.8  | 1 | 1826.1 | 83.3 | 7  | K.FAAATGATPIAGR.F                                                                                             |
|             | HsFlag-NUFIP_Ti_1C  | 4.4753 | 0.5023 | 1699.48 | 1699.907 | 3408.4  | 1 | 560.3  | 71.4 | 8  | R.FTPGTFTNQIAAFR.E                                                                                            |
|             | HsFlag-NUFIP_Ti_1C  | 3.0509 | 0.2708 | 913.3   | 913.105  | 4232    | 2 | 978    | 92.9 | 1  | R.LLVVTDPR.A                                                                                                  |
|             | HsFlag-NUFIP_Ti_1C  | 5.5581 | 0.4986 | 2997.06 | 2998.285 | 6353.2  | 1 | 838.2  | 44.2 | 10 | R.ADHQPLTEASYVNLPTIALCNTDSPLR.Y                                                                               |
|             | HsFlag-NUFIP_Ti_1C  | 5.9107 | 0.4253 | 2997.29 | 2998.285 | 8807.5  | 1 | 1816.3 | 36.5 | 19 | R.ADHQPLTEASYVNLPTIALCNTDSPLR.Y                                                                               |
|             | HsFlag-NUFIP_Ti_1C  | 3.4062 | 0.1796 | 1307.4  | 1307.455 | 4319.8  | 1 | 1167.2 | 90   | 4  | R.YVDIAIPCNNK.G                                                                                               |
| gi 15809016 | r                   | 4      | 15     | 28.50%  | 172      | 19779   |   |        |      |    | 4.8 myosin regulatory light chain MRCL2 [Homo sapiens]                                                        |
| gi 5453740  | re                  | 4      | 15     | 28.70%  | 171      | 19794   |   |        |      |    | 4.8 myosin regulatory light chain MRCL3 [Homo sapiens]                                                        |
|             | HsFLAG-ARP6_Ti_1    | 3.7386 | 0.2618 | 2090.98 | 2092.331 | 8215.1  | 1 | 679.6  | 47.1 | 4  | R.ATSNVFMFDQSQIQEFK.E                                                                                         |
|             | HsFLAG-ARP6_Ti_1    | 5.5389 | 0.4091 | 2351.6  | 2351.454 | 8064    | 1 | 1704.8 | 63.2 | 7  | R.NAFACFDEEATGTIQEDYLR.E                                                                                      |
|             | HsFLAG-ARP6_Ti_1    | 3.5554 | 0.0846 | 1389.37 | 1389.553 | 7205.6  | 1 | 1288.9 | 80   | 3  | K.KGNFNIEFTR.I                                                                                                |
|             | HsFLAG-Lin9_Ti_20   | 3.6641 | 0.2473 | 1261.06 | 1261.379 | 7716.4  | 1 | 1026.9 | 77.8 | 1  | K.GNFNIEFTR.I                                                                                                 |
| gi 14150100 | r                   | 4      | 9      | 28.40%  | 190      | 20713   |   |        |      |    | 9.5 hypothetical protein LOC84284 [Homo sapiens]                                                              |
| *           | HsFlag-NUFIP_Ti_11  | 3.6056 | 0.3785 | 1209.35 | 1209.434 | 4141    | 1 | 1020   | 86.4 | 3  | R.HVFLTGPPGVGK.T                                                                                              |
| *           | HsFLAG-TIP49b_Ti_   | 3.5109 | 0.283  | 1422.49 | 1421.64  | 7331.1  | 1 | 1226.1 | 75   | 2  | R.RIGFDVVTLGTR.G                                                                                              |
| *           | HsFLAG-p53-DNA-D    | 3.0702 | 0.3874 | 1836.54 | 1837.21  | 8170    | 1 | 587.5  | 44.1 | 2  | R.QLSTPGTILGTIPVK.G                                                                                           |
| *           | HsFLAG-ARP6_Ti_1    | 3.1564 | 0.3382 | 1225.36 | 1225.474 | 6096.4  | 1 | 1191.7 | 85   | 2  | K.GKPLALVEEIR.N                                                                                               |
| gi 4506625  | re                  | 5      | 7      | 28.40%  | 148      | 16561   |   |        |      |    | 11 ribosomal protein L27a [Homo sapiens]                                                                      |
| gi 88999528 | r                   | 5      | 7      | 28.40%  | 148      | 16622   |   |        |      |    | 11.1 PREDICTED: similar to 60S ribosomal protein L27a [Homo sapiens]                                          |
| gi 51465328 | r                   | 5      | 7      | 28.40%  | 148      | 16622   |   |        |      |    | 11.1 PREDICTED: similar to 60S ribosomal protein L27a [Homo sapiens]                                          |
|             | HsFLAG-TCF3_Ti_1    | 1.8218 | 0.0822 | 968.47  | 969.087  | 3573.2  | 3 | 373.3  | 78.6 | 1  | K.YHPGYFGK.V                                                                                                  |
|             | HsFLAG-TCF3_Ti_1    | 4.2422 | 0.3947 | 1576.72 | 1579.719 | 6651.7  | 2 | 933.5  | 70.8 | 3  | K.RNQSFCPTVNLDK.L                                                                                             |
|             | HsFLAG-ARP6_Ti_1    | 3.3083 | 0.2751 | 1233.94 | 1233.41  | 7037.8  | 1 | 1249.6 | 88.9 | 1  | K.LWTLVSEQTR.V                                                                                                |
|             | HsFLAG-TCF3_Ti_1    | 2.4015 | 0.2709 | 1111.63 | 1112.315 | 5138.6  | 1 | 375.7  | 65   | 1  | K.TGAAPIDVVR.S                                                                                                |
|             | HsFlag-les6_293_Ti_ | 2.9366 | 0.2691 | 1112.32 | 1112.315 | 3419.5  | 4 | 703.3  | 85   | 1  | K.TGAAPIDVVR.S                                                                                                |
| gi 5031741  | re                  | 8      | 32     | 28.20%  | 412      | 45746   |   |        |      |    | 6.5 DnaJ subfamily A member 2 [Homo sapiens]                                                                  |
| *           | HsFlag-NUFIP_Ti_2C  | 3.506  | 0.3726 | 1626.23 | 1626.803 | 10141.2 | 2 | 1021.5 | 57.7 | 2  | K.EISFAYEVLNPEK.R                                                                                             |
| *           | HsFLAG-ARP6_Ti_1    | 3.1183 | 0.2884 | 1782.56 | 1782.991 | 8369.8  | 1 | 813.7  | 53.6 | 2  | K.EISFAYEVLNPEK.R                                                                                             |
| *           | HsFLAG-TCF3_Ti_1    | 3.3031 | 0.368  | 1340.18 | 1338.392 | 7894    | 1 | 1115.3 | 70.8 | 1  | K.NVLCSCSGGGK.S                                                                                               |
| *           | HsFLAG-ARP6_Ti_1    | 4.6091 | 0.4645 | 2641.62 | 2641.978 | 3982.1  | 1 | 478.2  | 45.8 | 4  | R.ITFTGEADQAPGVEPGDIVLLLQEK.E                                                                                 |
| *           | HsFLAG-ARP6_Ti_1    | 5.0314 | 0.4403 | 2642.03 | 2641.978 | 7527    | 1 | 1412.3 | 36.5 | 2  | R.ITFTGEADQAPGVEPGDIVLLLQEK.E                                                                                 |
| *           | HsFLAG-ARP6_Ti_1    | 3.7669 | 0.4279 | 1730.19 | 1731.011 | 6852.1  | 1 | 1027.9 | 60.7 | 6  | K.IGLVEALCGFQFTFK.H                                                                                           |
| *           | HsFLAG-TCF3_Ti_1    | 4.5211 | 0.2368 | 1864.47 | 1864.024 | 3541.4  | 2 | 625.1  | 67.9 | 3  | K.FDVQFPENWINPDK.L                                                                                            |
| *           | HsSrcap_Ti_203.430  | 6.0596 | 0.3599 | 3786.34 | 3786.138 | 4595.9  | 1 | 1034   | 33.6 | 12 | K.LSELEDLLSRPEVPNIIGETEEVELQEFDSTR.G                                                                          |
| gi 55956788 | r                   | 26     | 504    | 28.00%  | 710      | 76615   |   |        |      |    | 4.7 nucleolin [Homo sapiens]                                                                                  |

|               |                    |        |        |         |          |         |   |        |      |                                                                           |
|---------------|--------------------|--------|--------|---------|----------|---------|---|--------|------|---------------------------------------------------------------------------|
| *             | HsFLAG-p53-DNA-D   | 2.6334 | 0.1417 | 857.53  | 858.069  | 5301.9  | 1 | 728.4  | 78.6 | 1 K.KVVVSPTK.K                                                            |
| *             | HsFLAG-p53-DNA-D   | 2.5362 | 0.1858 | 985.56  | 986.243  | 4621.6  | 1 | 522.4  | 68.8 | 1 K.KVVVSPTKK.V                                                           |
| *             | HsFLAG-p53-DNA-D   | 2.5478 | 0.229  | 884.49  | 885.095  | 5094.5  | 1 | 597.6  | 75   | 2 K.KVAVATPAK.K                                                           |
| *             | HsFLAG-p53-DNA-D   | 2.7786 | 0.2781 | 1012.53 | 1013.269 | 5051.3  | 1 | 697.1  | 72.2 | 2 K.KVAVATPAKK.A                                                          |
| *             | HsFLAG-p53-DNA-D   | 2.4188 | 0.2195 | 756.48  | 756.921  | 4773.7  | 1 | 446.7  | 78.6 | 6 K.VAVATPAK.K                                                            |
| *             | HsFLAG-p53-DNA-D   | 1.9051 | 0.0949 | 884.57  | 885.095  | 4048.5  | 2 | 405.1  | 68.8 | 1 K.VAVATPAKK.A                                                           |
| *             | HsFLAG-FLJ20729_   | 1.8885 | 0.0947 | 756.36  | 756.921  | 4173.7  | 1 | 328.6  | 71.4 | 1 K.ALVATPGK.K                                                            |
| *             | HsFLAG-p53-DNA-D   | 4.9982 | 0.322  | 2697.56 | 2698.051 | 7203.3  | 1 | 1416.4 | 37   | 1 K.KQKVEGTEPTTAFNLFVGNLNFNK.S                                            |
| *             | HsFLAG-ARP6_Ti_1   | 4.3962 | 0.4259 | 2568.38 | 2569.877 | 6485.5  | 1 | 424    | 36.4 | 3 K.QKVEGTEPTTAFNLFVGNLNFNK.S                                             |
| *             | HsFlag-NUFIP_Ti_1C | 4.8198 | 0.2578 | 2569.4  | 2569.877 | 8031.4  | 1 | 978.7  | 30.7 | 9 K.QKVEGTEPTTAFNLFVGNLNFNK.S                                             |
| *             | HsFlag-NUFIP_Ti_1C | 5.7412 | 0.3568 | 2312.4  | 2313.572 | 8442.5  | 1 | 1831.4 | 41.2 | 12 K.VEGTEPTTAFNLFVGNLNFNK.S                                              |
| *             | HsFlag-NUFIP_Ti_1C | 5.4967 | 0.4623 | 2312.87 | 2313.572 | 7677.7  | 1 | 1786   | 62.5 | 72 K.VEGTEPTTAFNLFVGNLNFNK.S                                              |
| *             | HsFLAG-p53-DNA-D   | 5.4367 | 0.4275 | 1777.06 | 1777.925 | 7233.3  | 1 | 2435.4 | 85.7 | 5 R.KFGYVDFESAEDLEK.A                                                     |
| *             | HsFlag-NUFIP_Ti_1C | 5.2007 | 0.4287 | 1648.68 | 1649.751 | 5788.2  | 1 | 1901.2 | 88.5 | 36 K.FGYVDFESAEDLEK.A                                                     |
| *             | HsFLAG-ARP6_Ti_1   | 2.9113 | 0.1789 | 1177.41 | 1177.386 | 6150    | 1 | 1000.4 | 88.9 | 2 K.VFGNEIKLEK.P                                                          |
| *             | HsFLAG-ARP6_Ti_1   | 3.7221 | 0.2555 | 1448.65 | 1448.659 | 6584.6  | 1 | 1273.4 | 81.8 | 1 K.NLPYKVTQDELK.E                                                        |
| *             | HsFLAG-ARP6_Ti_1   | 3.7449 | 0.2104 | 1179.4  | 1179.272 | 4847.7  | 1 | 1189   | 94.4 | 3 K.EVFEDAAEIR.L                                                          |
| *             | HsFLAG-ARP6_Ti_1   | 5.9768 | 0.5068 | 2501.02 | 2502.778 | 6712.4  | 1 | 1306.5 | 57.1 | 213 K.TLVLSNLSYSATEETLQEVFEK.A                                            |
| *             | HsFlag-NUFIP_Ti_11 | 4.1613 | 0.2913 | 2504.79 | 2502.778 | 8463    | 1 | 1087.2 | 33.3 | 5 K.TLVLSNLSYSATEETLQEVFEK.A                                              |
| *             | HsFLAG-ARP6_Ti_1   | 5.359  | 0.4852 | 1595.29 | 1595.748 | 8296.2  | 1 | 2243.9 | 80.8 | 91 K.GYAFIEFASFEDAK.E                                                     |
| *             | HsFLAG-p53-DNA-D   | 3.1404 | 0.1662 | 1326.25 | 1323.397 | 7682    | 2 | 898.4  | 68.2 | 2 K.GLSEDTTEETLK.E                                                        |
| *             | HsFLAG-ARP6_Ti_1   | 4.3525 | 0.4223 | 2201.31 | 2201.306 | 9160.2  | 1 | 1149.7 | 50   | 5 K.GLSEDTTEETLKESFDGSRV.A                                                |
| *             | HsFLAG-p53-DNA-D   | 2.9462 | 0.2576 | 1193.12 | 1193.299 | 9370.7  | 8 | 766.5  | 65   | 1 R.IVTDRETGSSK.G                                                         |
| *             | HsFLAG-ARP6_Ti_1   | 4.437  | 0.3574 | 1562.38 | 1562.632 | 5761.8  | 1 | 1192.9 | 76.9 | 23 K.GFGVDFNSEEDAK.A                                                      |
| *             | HsFLAG-ARP6_Ti_1   | 3.5707 | 0.3841 | 1308.36 | 1308.359 | 6549.4  | 1 | 1208.9 | 81.8 | 5 K.EAMEDGEIDGNK.V                                                        |
| *             | HsFLAG-ARP6_Ti_1   | 3.0222 | 0.2075 | 1058.1  | 1058.266 | 6503.7  | 6 | 1164.7 | 87.5 | 1 K.VTLDWAKPK.G                                                           |
| gi 38149981 r |                    | 5      | 27     | 28.00%  | 225      | 25486   |   |        |      | 9.7 small nuclear ribonucleoprotein polypeptide B" [Homo sapiens]         |
| gi 4507123 re |                    | 5      | 27     | 28.00%  | 225      | 25486   |   |        |      | 9.7 small nuclear ribonucleoprotein polypeptide B" [Homo sapiens]         |
|               | HsFlag-NUFIP_Ti_11 | 5.9391 | 0.4309 | 2107.76 | 2108.488 | 9852.4  | 1 | 2598.2 | 69.4 | 18 R.SLYALFSQFGHVVDIVALK.T                                                |
|               | HsFLAG-p53-DNA-D   | 1.82   | 0.1028 | 909.35  | 910.104  | 9474.6  | 8 | 664.6  | 71.4 | 1 R.GQAFVIFK.E                                                            |
|               | HsFlag-NUFIP_Ti_11 | 3.2912 | 0.2762 | 1569.58 | 1569.864 | 6104.5  | 1 | 594.2  | 66.7 | 1 R.QLQGFPFYGKPMR.I                                                       |
|               | HsFlag-NUFIP_Ti_1C | 4.1464 | 0.2931 | 2471.26 | 2470.707 | 9410.7  | 1 | 1352.6 | 34.1 | 2 R.LVPGRHDIAFVEFENDGQAGAAR.D                                             |
|               | HsFlag-NUFIP_Ti_1C | 4.6272 | 0.4734 | 1947.58 | 1948.059 | 11279.1 | 1 | 1524.4 | 58.8 | 5 R.HDIAFVEFENDGQAGAAR.D                                                  |
| gi 41151097 r |                    | 5      | 8      | 28.00%  | 214      | 24627   |   |        |      | 10.1 PREDICTED: similar to ribosomal protein L10 isoform 1 [Homo sapiens] |
| gi 89057215 r |                    | 5      | 8      | 28.00%  | 214      | 24627   |   |        |      | 10.1 PREDICTED: similar to ribosomal protein L10 isoform 4 [Homo sapiens] |
| gi 89057211 r |                    | 5      | 8      | 28.00%  | 214      | 24627   |   |        |      | 10.1 PREDICTED: similar to ribosomal protein L10 isoform 1 [Homo sapiens] |
| gi 89052350 r |                    | 5      | 8      | 28.00%  | 214      | 24627   |   |        |      | 10.1 PREDICTED: similar to ribosomal protein L10 isoform 4 [Homo sapiens] |
| gi 5174431 re |                    | 5      | 8      | 28.00%  | 214      | 24577   |   |        |      | 10.1 ribosomal protein L10 [Homo sapiens]                                 |
|               | HsFLAG-ARP6_Ti_1   | 4.0774 | 0.1893 | 3085.9  | 3084.304 | 9054.3  | 1 | 960.4  | 29.8 | 1 K.VDEFPLCGHMVSDEYEQLSSEALEAAR.I                                         |
|               | HsFLAG-TIP49b_Ti_  | 2.6148 | 0.2343 | 1188.58 | 1189.36  | 4646.5  | 5 | 278.5  | 59.1 | 1 R.GAFGKPQGTVAR.V                                                        |
|               | HsFlag-ZnF-HIT2_Ti | 2.7464 | 0.0938 | 1189.2  | 1189.36  | 2900.2  | 3 | 508.7  | 77.3 | 1 R.GAFGKPQGTVAR.V                                                        |
|               | HsFLAG-ARP6_Ti_1   | 3.7083 | 0.2544 | 1254.49 | 1253.549 | 4746    | 2 | 958.1  | 80   | 2 R.VHIGQVIMSIR.T                                                         |
|               | HsFLAG-ARP6_Ti_1   | 3.2865 | 0.233  | 1114.51 | 1115.284 | 4796.7  | 1 | 893.2  | 83.3 | 3 K.RLIPDGCGVK.Y                                                          |

|               |                    |        |        |         |          |                                              |   |        |      |                                      |
|---------------|--------------------|--------|--------|---------|----------|----------------------------------------------|---|--------|------|--------------------------------------|
| gj 4502551 re | 5                  | 10     | 27.90% | 315     | 37107    | 4.6 calumenin precursor [Homo sapiens]       |   |        |      |                                      |
| *             | HsFLAG-ARP6_Ti_1   | 2.6379 | 0.2602 | 1461.03 | 1461.577 | 7417.4                                       | 1 | 760.3  | 68.2 | 1 K.DRVHHEPQLSDK.V                   |
| *             | HsFLAG-ARP6_Ti_1   | 3.6553 | 0.3473 | 1665.32 | 1665.883 | 6722.6                                       | 1 | 739.4  | 57.7 | 2 K.DGFVTVDELKDWIK.F                 |
| *             | HsFLAG-ARP6_Ti_1   | 3.4034 | 0.3545 | 2280.11 | 2280.365 | 8853.8                                       | 2 | 770.8  | 44.7 | 2 K.NATYGYVLDDPDPDDGFNYK.Q           |
| *             | HsFLAG-ARP6_Ti_1   | 5.1459 | 0.3862 | 1535.17 | 1535.706 | 8107.2                                       | 1 | 1940.8 | 83.3 | 2 K.DIVVQETMEDIDK.N                  |
| *             | HsFLAG-ARP6_Ti_1   | 3.9472 | 0.275  | 3360.61 | 3361.531 | 6423.9                                       | 1 | 576.1  | 24.1 | 3 K.NADGFIDLEEYIGDMYSHDGNTPDEPEVVK.T |
| gj 17999537 r | 47                 | 178    | 27.80% | 2335    | 273686   | 8.8 U5 snRNP-specific protein [Homo sapiens] |   |        |      |                                      |
| *             | HsFlag-ZnF-HIT2_Ti | 4.6866 | 0.4406 | 2165.48 | 2166.454 | 4090.9                                       | 1 | 666.2  | 57.5 | 4 R.GPGNPVPGPLAPLPDYMSEEK.L          |
| *             | HsFlag-ZnF-HIT2_Ti | 5.7503 | 0.4358 | 2534.82 | 2534.868 | 6112.8                                       | 1 | 1295.8 | 60   | 36 R.LANQLLTDLVDDNYFYFLDLK.A         |
| *             | HsFLAG-p53-DNA-D   | 5.2639 | 0.4461 | 2122.89 | 2123.197 | 10508.9                                      | 1 | 2002.5 | 65.6 | 6 R.DINLQDEDWNEFNDINK.I              |
| *             | HsFLAG-Lin9_Ti_20  | 3.5359 | 0.2146 | 2457.46 | 2458.733 | 4649                                         | 1 | 787.6  | 40   | 1 K.TEDPDLPAFYFDPLINPISHR.H          |
| *             | HsFlag-ZnF-HIT2_Ti | 4.0853 | 0.4478 | 2457.8  | 2458.733 | 5345.5                                       | 1 | 795.4  | 55   | 11 K.TEDPDLPAFYFDPLINPISHR.H         |
| *             | HsFlag-DPCD_Ti_20  | 3.6947 | 0.0883 | 2750.88 | 2750.972 | 6895.7                                       | 6 | 879    | 34.1 | 1 K.SQEPLPDDDEEFELPEFVEPFLK.D        |
| *             | HsFLAG-p53-DNA-D   | 4.6693 | 0.3917 | 2750.9  | 2750.972 | 5609.1                                       | 1 | 650.3  | 45.5 | 10 K.SQEPLPDDDEEFELPEFVEPFLK.D       |
| *             | HsFlag-ZnF-HIT2_Ti | 2.0347 | 0.2976 | 1122.27 | 1123.22  | 3378.4                                       | 7 | 204.9  | 61.1 | 1 R.EHCAPAGQPVK.V                    |
| *             | HsFlag-ZnF-HIT2_Ti | 3.8126 | 0.3336 | 1123.43 | 1122.238 | 6905                                         | 1 | 1047   | 87.5 | 2 R.FGNAFHLCR.E                      |
| *             | HsFlag-ZnF-HIT2_Ti | 2.6153 | 0.3113 | 1770.74 | 1772.146 | 8445.6                                       | 1 | 543.6  | 46.7 | 1 R.AAVMHDILDMMPGK.Q                 |
| *             | HsFLAG-FLJ20729_   | 3.6462 | 0.2031 | 1354.35 | 1354.552 | 9605.2                                       | 1 | 1605.4 | 85   | 5 R.TILQHLSEAWR.C                    |
| *             | HsARP6-FLAG_Ti_1   | 2.5375 | 0.2585 | 1550.11 | 1550.9   | 4111.9                                       | 1 | 399.4  | 57.7 | 1 K.VPGLPTPIENMILR.Y                 |
| *             | HsFlag-ZnF-HIT2_Ti | 3.5081 | 0.3663 | 1536.36 | 1535.618 | 6992.1                                       | 1 | 1230.5 | 77.3 | 3 K.ADWWTNTAHYNR.E                   |
| *             | HsFlag-ZnF-HIT2_Ti | 4.3483 | 0.3964 | 2823.53 | 2823.23  | 5704.6                                       | 1 | 536.4  | 39.1 | 3 K.EVGIEFMDLYSHLVPVYDVEPLEK.I       |
| *             | HsFlag-ZnF-HIT2_Ti | 3.3042 | 0.2833 | 2007.72 | 2008.191 | 8843                                         | 1 | 1118.6 | 56.7 | 1 K.ITDAYLDQYLWYEADK.R               |
| *             | HsFlag-ZnF-HIT2_Ti | 2.7848 | 0.1703 | 1421.6  | 1421.571 | 8498.7                                       | 1 | 630.4  | 63.6 | 1 K.DMNHTNSYGIIR.G                   |
| *             | HsFlag-ZnF-HIT2_Ti | 2.7365 | 0.2062 | 811.28  | 810.888  | 4287.8                                       | 2 | 873    | 100  | 1 K.HDVNLGR.A                        |
| *             | HsFlag-ZnF-HIT2_Ti | 4.001  | 0.3608 | 1887.54 | 1888.037 | 5870.6                                       | 1 | 971.4  | 64.3 | 2 K.DNPNULLFNMGCFECR.I               |
| *             | HsSrcap_Ti_202.013 | 3.1271 | 0.2878 | 1403.55 | 1403.535 | 5403.8                                       | 1 | 527.2  | 68.2 | 1 K.DGVWNLQNEVTK.E                   |
| *             | HsSrcap_Ti_202.013 | 3.9705 | 0.2155 | 1403.66 | 1403.535 | 7800.9                                       | 1 | 1525.8 | 81.8 | 3 K.DGVWNLQNEVTK.E                   |
| *             | HsFLAG-p53-DNA-D   | 4.8737 | 0.2591 | 1685.94 | 1684.971 | 8156.2                                       | 1 | 1462.8 | 71.4 | 4 R.EAVVNTQELDLLVK.C                 |
| *             | HsFLAG-FLJ20729_   | 2.9461 | 0.2674 | 1666.75 | 1667.022 | 7735.2                                       | 1 | 694.3  | 57.7 | 1 K.MPSRFPVVFYTPK.E                  |
| *             | HsFlag-ZnF-HIT2_Ti | 2.6867 | 0.3262 | 1174.13 | 1174.302 | 4174.6                                       | 1 | 666.3  | 94.4 | 1 K.QTDVGITHFR.S                     |
| *             | HsFlag-ZnF-HIT2_Ti | 4.2986 | 0.4106 | 1889.27 | 1890.078 | 4656                                         | 1 | 887.6  | 66.7 | 4 R.SGMSHEEDQLIPNLYR.Y               |
| *             | HsFLAG-p53-DNA-D   | 3.7003 | 0.3362 | 1798.43 | 1798.949 | 4994                                         | 1 | 885.3  | 73.1 | 1 R.YIQPWESEFIDSQR.V                 |
| *             | HsFlag-ZnF-HIT2_Ti | 3.8178 | 0.1457 | 1086.47 | 1086.196 | 8298.8                                       | 1 | 1900.1 | 100  | 1 K.RQEAIQNR.R                       |
| *             | HsFLAG-p53-DNA-D   | 2.275  | 0.2592 | 847.35  | 847.946  | 5005.9                                       | 1 | 598.1  | 83.3 | 4 R.HTLAYDK.G                        |
| *             | HsFlag-ZnF-HIT2_Ti | 2.9409 | 0.1694 | 1400.53 | 1400.542 | 3976.8                                       | 3 | 363.7  | 72.2 | 1 K.QNPFWWTHQR.H                     |
| *             | HsFlag-ZnF-HIT2_Ti | 2.508  | 0.0951 | 1093.01 | 1093.23  | 3898.8                                       | 3 | 659.8  | 92.9 | 1 K.LWNLNLYR.T                       |
| *             | HsFLAG-p53-DNA-D   | 4.696  | 0.3067 | 2172.8  | 2173.532 | 7060.8                                       | 1 | 1747.4 | 63.2 | 5 R.TDMIQALGGVEGILEHTLFK.G           |
| *             | HsFlag-VPS71_Ti_1  | 4.9576 | 0.3721 | 2174.92 | 2173.532 | 4920.4                                       | 1 | 1451.4 | 48.7 | 11 R.TDMIQALGGVEGILEHTLFK.G          |
| *             | HsFLAG-p53-DNA-D   | 4.0557 | 0.3816 | 1761.22 | 1761.974 | 4564                                         | 1 | 862.7  | 73.1 | 3 K.GTYFPTWEGFLWEK.A                 |
| *             | HsFlag-ZnF-HIT2_Ti | 3.8151 | 0.2931 | 1473.26 | 1473.672 | 4881                                         | 1 | 724.8  | 70.8 | 13 K.WNVSRLSLADSK.D                  |
| *             | HsARP6-FLAG_Ti_1   | 4.5116 | 0.361  | 2350.87 | 2351.71  | 9268.9                                       | 1 | 896.8  | 33.8 | 2 K.TFEGNLTKPINGAIFIFNPR.T           |
| *             | HsFlag-ZnF-HIT2_Ti | 2.7728 | 0.2392 | 1240.35 | 1240.448 | 7403                                         | 1 | 981.8  | 80   | 1 K.IIHTSVWAGQK.R                    |
| *             | HsFlag-VPS71_Ti_1  | 3.288  | 0.317  | 2165.37 | 2164.611 | 7343.9                                       | 1 | 697.8  | 47.2 | 1 K.GMLDPLEVHLLDFPNIVIK.G            |

|               |                    |        |        |         |          |                                                                   |   |        |      |    |                                  |
|---------------|--------------------|--------|--------|---------|----------|-------------------------------------------------------------------|---|--------|------|----|----------------------------------|
| *             | HsScrap_Ti_102.280 | 2.7903 | 0.1692 | 1491.94 | 1491.694 | 3826.6                                                            | 5 | 501.7  | 62.5 | 1  | K.GSELQLPFQACLK.V                |
| *             | HsFLAG-p53-DNA-D   | 4.8416 | 0.4401 | 2084.06 | 2084.394 | 7485.2                                                            | 1 | 1618.2 | 71.9 | 11 | K.ATEPQMVLFNLYDDWLK.T            |
| *             | HsScrap_Ti_102.214 | 2.0039 | 0.1636 | 1007.61 | 1008.159 | 6878.3                                                            | 9 | 530    | 68.8 | 1  | K.DLILADYGK.K                    |
| *             | HsFlag-ZnF-HIT2_Ti | 2.9884 | 0.3456 | 1263.24 | 1263.35  | 7768.3                                                            | 1 | 941    | 75   | 2  | K.EQSQTATQTR.T                   |
| *             | HsFlag-ZnF-HIT2_Ti | 5.5754 | 0.4715 | 2346.9  | 2347.454 | 5641.3                                                            | 1 | 597.6  | 52.5 | 2  | K.HGDEIITSTTSNYETQTFSSK.T        |
| *             | HsFlag-ZnF-HIT2_Ti | 3.5418 | 0.2131 | 1067.34 | 1066.249 | 5664.7                                                            | 1 | 1074.9 | 88.9 | 3  | R.AISAANLHLR.T                   |
| *             | HsFlag-ZnF-HIT2_Ti | 3.5932 | 0.288  | 1393.41 | 1392.508 | 5884.8                                                            | 1 | 802.3  | 72.7 | 1  | R.TNHIYVSSDDIK.E                 |
| *             | HsScrap_Ti_102.231 | 3.2775 | 0.3963 | 2018.4  | 2018.277 | 4375.9                                                            | 1 | 698.1  | 58.3 | 1  | R.AQIAGYLYGVSPDPNPQVK.E          |
| *             | HsFLAG-Lin9_Ti_20  | 4.3123 | 0.3628 | 3196.15 | 3198.679 | 5990.6                                                            | 1 | 506.4  | 26.9 | 1  | R.CIVMVPQWGHQTVHLPGQLPQHEYLK.E   |
| *             | HsFLAG-p53-DNA-D   | 5.3937 | 0.333  | 3171.15 | 3172.496 | 9575.8                                                            | 1 | 1533.4 | 32.4 | 5  | K.EMEPLGWIHTQPNSPQLSPQDVTTHAK.I  |
| *             | HsFlag-ZnF-HIT2_Ti | 5.2254 | 0.5091 | 2134.51 | 2135.394 | 3988.2                                                            | 1 | 973.6  | 69.4 | 2  | K.TIIITCSFTPGSCTLTAYK.L          |
| gi 4503483 re | 17                 | 65     | 27.70% | 858     | 95338    | 6.8 eukaryotic translation elongation factor 2 [Homo sapiens]     |   |        |      |    |                                  |
| *             | HsFLAG-p53-DNA-D   | 5.039  | 0.3362 | 2204.76 | 2205.469 | 8754.9                                                            | 1 | 1316.9 | 55.6 | 9  | K.STAISLFYELSENDLNFIK.Q          |
| *             | HsFLAG-ARP6_Ti_1   | 5.4798 | 0.3529 | 2221.68 | 2221.515 | 4724.7                                                            | 1 | 1089.1 | 67.6 | 7  | R.ALLELQLEPEELYQTFQR.I           |
| *             | HsFlag-VPS71_Ti_1  | 4.3955 | 0.2899 | 1496.18 | 1495.768 | 7966.1                                                            | 1 | 1554.3 | 81.8 | 5  | R.TFCQLILDPIFK.V                 |
| *             | HsFLAG-p53-DNA-D   | 4.0357 | 0.2235 | 1715.53 | 1715.941 | 8378.4                                                            | 1 | 1063.5 | 60.7 | 1  | K.LDSEDKKEGKPLLK.A               |
| *             | HsFLAG-p53-DNA-D   | 4.9107 | 0.4085 | 2602.03 | 2602.11  | 8099.7                                                            | 1 | 953.3  | 45.7 | 2  | R.WLPAGDALLQMITIHLPSVTAQK.Y      |
| *             | HsFlag-VPS71_Ti_1  | 2.4397 | 0.1857 | 1107.62 | 1108.323 | 7088                                                              | 3 | 595.5  | 65   | 2  | R.VFSGLVSTGLK.V                  |
| *             | HsFLAG-FLJ20729_   | 4.4833 | 0.3619 | 2760.33 | 2761.154 | 7616                                                              | 1 | 1097.7 | 32.3 | 2  | R.YVEPIEDVPCGNIVGLVGDQFLVK.T     |
| *             | HsFLAG-TCF3_Ti_1   | 3.4009 | 0.3853 | 2760.96 | 2761.154 | 4925.5                                                            | 1 | 514.4  | 39.6 | 2  | R.YVEPIEDVPCGNIVGLVGDQFLVK.T     |
| *             | HsFlag-VPS71_Ti_1  | 5.5375 | 0.2056 | 2144.24 | 2144.349 | 8882.9                                                            | 1 | 2043.3 | 43.4 | 4  | K.ARPFPDGLAEDIDKGEVSAR.Q         |
| *             | HsFLAG-p53-DNA-D   | 4.6262 | 0.2852 | 2234.84 | 2234.523 | 8103.9                                                            | 5 | 843.2  | 34.2 | 1  | R.KIWCFGPDGTGNILTDITK.G          |
| *             | HsFlag-VPS71_Ti_1  | 4.991  | 0.281  | 2235.11 | 2234.523 | 5278.2                                                            | 1 | 968.7  | 60.5 | 5  | R.KIWCFGPDGTGNILTDITK.G          |
| *             | HsFLAG-ARP6_Ti_1   | 4.9471 | 0.4587 | 2105.27 | 2106.349 | 7293.4                                                            | 1 | 1433   | 63.9 | 4  | K.IWCFGPDGTGNILTDITK.G           |
| *             | HsFLAG-p53-DNA-D   | 5.2811 | 0.3383 | 2992.75 | 2991.482 | 9757.9                                                            | 1 | 1977.1 | 35   | 3  | R.LMEPIYLVEIQCEQVGGIYGLVNR.K     |
| *             | HsFlag-VPS71_Ti_1  | 4.5343 | 0.5346 | 2118.92 | 2119.446 | 8848                                                              | 1 | 642.7  | 44.4 | 2  | K.RGHVFEEESQVAGTPMFVVK.A         |
| *             | HsFLAG-p53-DNA-D   | 5.9946 | 0.4724 | 1963.8  | 1963.259 | 8919.5                                                            | 1 | 2378   | 73.5 | 2  | R.GHVFEESQVAGTPMFVVK.A           |
| *             | HsFlag-VPS71_Ti_1  | 2.5065 | 0.2507 | 1800.62 | 1801.009 | 4019.8                                                            | 5 | 279.7  | 53.3 | 1  | K.AYLPVNESFGFTADLR.S             |
| *             | HsFlag-VPS71_Ti_1  | 3.4979 | 0.243  | 1446.88 | 1445.656 | 4984                                                              | 1 | 754.1  | 75   | 13 | K.EGIPALDNFLDKL.-                |
| gi 30410781 r | 9                  | 18     | 27.60% | 591     | 69423    | 5.1 hypothetical protein LOC65095 isoform 2 [Homo sapiens]        |   |        |      |    |                                  |
| gi 30410783 r | 9                  | 18     | 23.00% | 709     | 83251    | 5.2 hypothetical protein LOC65095 isoform 1 [Homo sapiens]        |   |        |      |    |                                  |
|               | HsFlag-NUFIP_Ti_1  | 5.8131 | 0.4517 | 2241.17 | 2241.284 | 8992.7                                                            | 1 | 2025   | 61.9 | 2  | R.AFVEDESEDEDGAGEGSSLLQK.R       |
|               | HsFlag-NUFIP_Ti_1  | 5.5113 | 0.388  | 3278.11 | 3276.528 | 6170.9                                                            | 1 | 925.7  | 32.1 | 1  | K.VTGNEMLGLEEGDLEDDFPAQHDQLMQK.C |
|               | HsFlag-NUFIP_Ti_1  | 5.6778 | 0.4196 | 1974.71 | 1975.208 | 6381.2                                                            | 1 | 1659   | 69.4 | 5  | K.SPFAAAVQGEKPVFEPGDK.T          |
|               | HsFlag-NUFIP_Ti_1  | 3.5953 | 0.3034 | 1529.74 | 1528.615 | 9818.3                                                            | 1 | 1682.4 | 85   | 1  | K.TFEEYLDEYYR.L                  |
|               | HsFlag-NUFIP_Ti_1  | 4.321  | 0.4365 | 2180.99 | 2181.367 | 4361.2                                                            | 1 | 573    | 55.3 | 2  | R.TVPCDFGLSTEEILAADDK.E          |
|               | HsFlag-NUFIP_Ti_1  | 5.201  | 0.3777 | 2130.53 | 2131.273 | 8695.7                                                            | 1 | 1597.8 | 63.9 | 2  | K.SLCREEAETPAEATGKPKR.D          |
|               | HsFlag-NUFIP_Ti_1  | 3.2821 | 0.2791 | 1614.23 | 1614.709 | 6531.7                                                            | 2 | 511.9  | 53.6 | 1  | R.EEAETPAEATGKPKR.D              |
|               | HsFlag-NUFIP_Ti_1  | 3.7945 | 0.2236 | 2912.72 | 2913.229 | 6592.5                                                            | 1 | 676.4  | 26.9 | 1  | R.QLPALDGLMGPESPPAQEEEEAPVSPHK.K |
|               | HsFlag-NUFIP_Ti_1  | 3.8622 | 0.3999 | 1637.7  | 1637.901 | 5941.6                                                            | 1 | 1177.1 | 71.4 | 3  | R.LLGPTVMLGGCEFSR.Q              |
| gi 13514813 r | 14                 | 94     | 27.50% | 662     | 73272    | 7.2 DEAD/H (Asp-Glu-Ala-Asp/His) box polypeptide 3 [Homo sapiens] |   |        |      |    |                                  |
| gi 13514817 r | 14                 | 94     | 27.50% | 662     | 73272    | 7.2 DEAD/H (Asp-Glu-Ala-Asp/His) box polypeptide 3 [Homo sapiens] |   |        |      |    |                                  |
|               | HsFLAG-Lin9_Ti_20  | 2.6822 | 0.2384 | 1758.19 | 1758.839 | 4642.3                                                            | 1 | 335.6  | 46.4 | 1  | K.SDEDDWSKPLPPSER.L              |

|             |                        |        |        |         |          |         |   |        |      |    |                                                                           |
|-------------|------------------------|--------|--------|---------|----------|---------|---|--------|------|----|---------------------------------------------------------------------------|
|             | HsFLAG-Lin9_Ti_20'     | 4.3046 | 0.327  | 1886.56 | 1884.053 | 7043.5  | 1 | 1263   | 65.6 | 2  | R.LEQELFSGGNTGINFEK.Y                                                     |
|             | HsFLAG-UTX1_Ti_20'     | 5.6118 | 0.4035 | 2333.45 | 2333.69  | 5601.8  | 1 | 1423.2 | 64.3 | 31 | K.TAAFLLPILSQIYSDGPGALR.A                                                 |
|             | HsFLAG-FLJ20729_Ti_20' | 5.8628 | 0.4188 | 2333.63 | 2333.69  | 7327.4  | 1 | 1607.5 | 41.7 | 11 | K.TAAFLLPILSQIYSDGPGALR.A                                                 |
|             | HsFLAG-Lin9_Ti_20'     | 4.5686 | 0.378  | 1888.62 | 1889.131 | 4301.3  | 1 | 1131.7 | 68.8 | 6  | R.VRPCVVYGGADIGQQIR.D                                                     |
|             | HsFLAG-Lin9_Ti_20'     | 3.8519 | 0.3501 | 1180.51 | 1181.346 | 7286.3  | 1 | 1429.5 | 80   | 4  | R.GCHLLVATPGR.L                                                           |
|             | HsFlag-VPS71_Ti_10'    | 3.9446 | 0.3609 | 1338.59 | 1337.595 | 6421.6  | 1 | 1768.7 | 90   | 2  | R.MLDMGFEPQIR.R                                                           |
|             | HsARP6-FLAG_Ti_10'     | 3.7593 | 0.3244 | 1558.09 | 1558.774 | 10252.4 | 1 | 1538   | 70.8 | 5  | R.DFLDEYIFLAVGR.V                                                         |
|             | HsARP6-FLAG_Ti_10'     | 4.6193 | 0.2146 | 1448.84 | 1448.706 | 7288.5  | 1 | 1680   | 83.3 | 7  | K.RSFLLDLLNATGK.D                                                         |
|             | HsMRGBP-FLAG_Ti_10'    | 2.948  | 0.2414 | 1302.65 | 1301.404 | 4049.2  | 4 | 372.7  | 72.2 | 2  | R.DREEALHQFR.S                                                            |
|             | HsFlag-VPS71_Ti_10'    | 4.0613 | 0.3726 | 1169.5  | 1169.41  | 7511.7  | 1 | 1599.5 | 86.4 | 4  | K.SPILVATAVAAR.G                                                          |
|             | HsFLAG-Lin9_Ti_20'     | 5.282  | 0.3126 | 2084.06 | 2084.296 | 7080.3  | 1 | 1409.6 | 45.3 | 4  | K.HVINFDLPDIEEYVHR.I                                                      |
|             | HsFLAG-Lin9_Ti_20'     | 4.0995 | 0.3965 | 1526.33 | 1525.704 | 7758    | 1 | 1233.5 | 73.1 | 14 | R.VGNLGLATSFNER.N                                                         |
|             | HsFLAG-Lin9_Ti_20'     | 4.0757 | 0.1322 | 1129.21 | 1129.339 | 6372    | 1 | 1422.3 | 83.3 | 1  | K.DLLDLLVEAK.Q                                                            |
| gi 15431293 | r                      | 6      | 28     | 27.50%  | 204      | 24146   |   |        |      |    | 11.6 ribosomal protein L15 [Homo sapiens]                                 |
| gi 88998872 | r                      | 6      | 28     | 27.50%  | 204      | 24174   |   |        |      |    | 11.6 PREDICTED: similar to ribosomal protein L15 isoform 6 [Homo sapiens] |
| gi 88998870 | r                      | 6      | 28     | 27.50%  | 204      | 24174   |   |        |      |    | 11.6 PREDICTED: similar to ribosomal protein L15 isoform 5 [Homo sapiens] |
| gi 88998868 | r                      | 6      | 28     | 27.50%  | 204      | 24174   |   |        |      |    | 11.6 PREDICTED: similar to ribosomal protein L15 isoform 4 [Homo sapiens] |
| gi 88998866 | r                      | 6      | 28     | 27.50%  | 204      | 24174   |   |        |      |    | 11.6 PREDICTED: similar to ribosomal protein L15 isoform 3 [Homo sapiens] |
| gi 88998864 | r                      | 6      | 28     | 27.50%  | 204      | 24174   |   |        |      |    | 11.6 PREDICTED: similar to ribosomal protein L15 isoform 1 [Homo sapiens] |
| gi 88992466 | r                      | 6      | 28     | 27.50%  | 204      | 24174   |   |        |      |    | 11.6 PREDICTED: similar to ribosomal protein L15 isoform 5 [Homo sapiens] |
| gi 88992463 | r                      | 6      | 28     | 27.50%  | 204      | 24174   |   |        |      |    | 11.6 PREDICTED: similar to ribosomal protein L15 isoform 4 [Homo sapiens] |
| gi 88992460 | r                      | 6      | 28     | 27.50%  | 204      | 24174   |   |        |      |    | 11.6 PREDICTED: similar to ribosomal protein L15 isoform 3 [Homo sapiens] |
| gi 88992455 | r                      | 6      | 28     | 27.50%  | 204      | 24174   |   |        |      |    | 11.6 PREDICTED: similar to ribosomal protein L15 isoform 1 [Homo sapiens] |
|             | HsFLAG-p53-DNA-D       | 3.4669 | 0.3893 | 1705.98 | 1706.945 | 5136.2  | 1 | 587.5  | 56.7 | 4  | K.GATYGKPVHHGVNQLK.F                                                      |
|             | HsFLAG-TCF3_Ti_10'     | 2.9071 | 0.105  | 1019.36 | 1019.1   | 6187.1  | 2 | 802.5  | 81.2 | 1  | R.SLQSVAEER.A                                                             |
|             | HsFLAG-TCF3_Ti_10'     | 3.5508 | 0.2919 | 1505.67 | 1505.8   | 4277.4  | 1 | 497.7  | 68.2 | 2  | K.FFEVILIDPFHK.A                                                          |
|             | HsFLAG-ARP6_Ti_10'     | 4.0112 | 0.3449 | 1507.39 | 1505.8   | 7328.1  | 1 | 1464.6 | 77.3 | 19 | K.FFEVILIDPFHK.A                                                          |
|             | HsFLAG-ARP6_Ti_10'     | 2.9027 | 0.0985 | 1259.62 | 1259.407 | 7648.9  | 4 | 827.1  | 72.2 | 1  | R.RNPDTQWITK.P                                                            |
|             | HsFLAG-ARP6_Ti_10'     | 2.2907 | 0.1611 | 1011.5  | 1012.116 | 5473    | 6 | 313.1  | 68.8 | 1  | K.FHHTIGGSR.R                                                             |
| gi 18104948 | r                      | 4      | 22     | 27.50%  | 160      | 18565   |   |        |      |    | 10.5 ribosomal protein L21 [Homo sapiens]                                 |
| gi 89031623 | r                      | 4      | 22     | 27.50%  | 160      | 18565   |   |        |      |    | 10.5 PREDICTED: similar to ribosomal protein L21 isoform 1 [Homo sapiens] |
| gi 89026818 | r                      | 4      | 22     | 27.50%  | 160      | 18595   |   |        |      |    | 10.5 PREDICTED: similar to 60S ribosomal protein L21 [Homo sapiens]       |
| gi 89025818 | r                      | 4      | 22     | 27.50%  | 160      | 18595   |   |        |      |    | 10.5 PREDICTED: similar to 60S ribosomal protein L21 [Homo sapiens]       |
| gi 88952736 | r                      | 4      | 22     | 27.50%  | 160      | 18535   |   |        |      |    | 10.5 PREDICTED: similar to 60S ribosomal protein L21 [Homo sapiens]       |
| gi 88943726 | r                      | 4      | 22     | 27.50%  | 160      | 18535   |   |        |      |    | 10.5 PREDICTED: similar to 60S ribosomal protein L21 [Homo sapiens]       |
| gi 51466076 | r                      | 4      | 22     | 27.50%  | 160      | 18595   |   |        |      |    | 10.5 PREDICTED: similar to 60S ribosomal protein L21 [Homo sapiens]       |
|             | HsFLAG-TCF3_Ti_10'     | 2.8912 | 0.1988 | 1244.58 | 1244.497 | 4521.2  | 1 | 938.3  | 85   | 1  | K.HGVVPLATYMR.I                                                           |
|             | HsFLAG-TCF3_Ti_10'     | 5.6281 | 0.369  | 1641.7  | 1641.911 | 8391.5  | 1 | 3083.2 | 89.3 | 15 | R.VYNVTQHAVGIVVNK.Q                                                       |
|             | HsFLAG-TCF3_Ti_10'     | 4.0386 | 0.4119 | 1642.74 | 1641.911 | 4018.4  | 1 | 755.8  | 46.4 | 4  | R.VYNVTQHAVGIVVNK.Q                                                       |
|             | HsFLAG-ARP6_Ti_10'     | 3.8836 | 0.2912 | 2079.33 | 2079.372 | 6852.4  | 1 | 1079.5 | 55.9 | 2  | R.TNGKEPELLEPIPIYEFMA.-                                                   |
| gi 33504573 | r                      | 10     | 28     | 27.40%  | 430      | 46039   |   |        |      |    | 6.8 hypothetical protein LOC347918 [Homo sapiens]                         |
| *           | HsMRGBP-FLAG_Ti_10'    | 4.0801 | 0.3861 | 2588.77 | 2588.843 | 4851.5  | 1 | 664.9  | 46.2 | 5  | R.AGAPGPGGLGCSSSPTGDFVDASVLVR.Q                                           |
|             | HsYL1-FLAG_Ti_20'      | 4.4456 | 0.4387 | 2578.03 | 2578.946 | 5095.8  | 1 | 557.9  | 40.7 | 3  | R.TPGVLLPGAGGAAGFGMTSPPPPTSPSR.T                                          |



|               |                            |        |        |         |          |        |   |        |      |                                                                                                                                                   |
|---------------|----------------------------|--------|--------|---------|----------|--------|---|--------|------|---------------------------------------------------------------------------------------------------------------------------------------------------|
|               | HsTIP60_Ti_106.011         | 3.8731 | 0.4046 | 2029.09 | 2028.372 | 3245.1 | 4 | 214.6  | 42.5 | 2 R.TAVPPGLSSLPLTSVGNMGMK.K                                                                                                                       |
|               | HsMRGBP-FLAG_Ti_106.011    | 4.6866 | 0.4365 | 2030.87 | 2028.372 | 6675.5 | 1 | 1003.2 | 37.5 | 1 R.TAVPPGLSSLPLTSVGNMGMK.K                                                                                                                       |
|               | HsTIP60_Ti_106.223         | 4.1117 | 0.3041 | 1828.51 | 1828.152 | 2939.6 | 1 | 504.9  | 70   | 7 K.KLEEIPPASPEMAQMR.K                                                                                                                            |
|               | HsMRGBP-FLAG_Ti_106.223    | 3.9763 | 0.1089 | 1831.09 | 1828.152 | 7435.3 | 1 | 1379.4 | 46.7 | 1 K.KLEEIPPASPEMAQMR.K                                                                                                                            |
| *             | HsMRGBP-FLAG_Ti_106.223    | 2.9954 | 0.3717 | 1801.89 | 1801.981 | 6093.2 | 2 | 292.8  | 50   | 1 K.QCLDYHHQEMQALK.E                                                                                                                              |
| *             | HsMRGBP-FLAG_Ti_106.223    | 3.0535 | 0.2848 | 1479.77 | 1479.722 | 5812.6 | 2 | 769    | 72.7 | 2 K.ERLYGLQAYLR.Q                                                                                                                                 |
| *             | HsMRGBP-FLAG_Ti_106.223    | 2.2368 | 0.2324 | 1193.7  | 1194.419 | 4069.3 | 6 | 215.8  | 61.1 | 2 R.LYGPLQAYLR.Q                                                                                                                                  |
| *             | HsTIP60_Ti_106.269         | 3.6626 | 0.3514 | 1194.34 | 1194.419 | 4634.8 | 1 | 1085.8 | 94.4 | 4 R.LYGPLQAYLR.Q                                                                                                                                  |
| gi 4506725 re |                            | 6      | 21     | 27.40%  | 263      | 29598  |   |        |      | 10.2 ribosomal protein S4, X-linked X isoform [Homo sapiens]                                                                                      |
|               | HsFLAG-ARP6_Ti_106.269     | 2.8737 | 0.2189 | 1565.27 | 1565.815 | 7188.8 | 8 | 520.7  | 53.6 | 1 K.LTGVFAPRPSTGPHK.L                                                                                                                             |
| *             | HsFLAG-TCF3_Ti_106.269     | 4.9113 | 0.3653 | 1543.89 | 1543.902 | 7045.7 | 1 | 1418.7 | 81.8 | 6 K.LRECLPLIIFLR.N                                                                                                                                |
| *             | HsFLAG-ARP6_Ti_106.269     | 2.6548 | 0.2161 | 1274.74 | 1274.555 | 5736.3 | 1 | 741.8  | 77.8 | 2 R.ECLPLIIFLR.N                                                                                                                                  |
| *             | HsFLAG-ARP6_Ti_106.269     | 3.2528 | 0.2909 | 1886.52 | 1887.155 | 2585   | 1 | 348.3  | 59.4 | 1 R.TDITYPAGFMDVISDK.T                                                                                                                            |
|               | HsFLAG-Lin9_Ti_206.269     | 3.2081 | 0.2935 | 1216.15 | 1216.385 | 4827.1 | 1 | 718.5  | 75   | 10 K.GIPHLVTHDAR.T                                                                                                                                |
| *             | HsFLAG-ARP6_Ti_106.269     | 3.8681 | 0.3932 | 1782.94 | 1783.963 | 7659.8 | 1 | 1249   | 62.5 | 1 K.FDTGNLCMVTGGANLGR.I                                                                                                                           |
| gi 4506649 re |                            | 13     | 47     | 27.30%  | 403      | 46109  |   |        |      | 10.2 ribosomal protein L3 isoform a [Homo sapiens]                                                                                                |
| gi 76496472 r |                            | 13     | 47     | 31.10%  | 354      | 40152  |   |        |      | 10.2 ribosomal protein L3 isoform b [Homo sapiens]                                                                                                |
|               | HsFlag-NUFIP_Ti_106.269    | 3.2997 | 0.2948 | 984.44  | 984.146  | 5502.5 | 1 | 1018.6 | 87.5 | 5 R.HGSLGFLPR.K                                                                                                                                   |
|               | HsFLAG-TCF3_Ti_106.269     | 3.5276 | 0.341  | 2248.77 | 2248.586 | 6857.1 | 1 | 820.7  | 52.6 | 2 K.SFPKDDPSKPVHLTAFLGYK.A                                                                                                                        |
|               | HsFlag-NUFIP_Ti_106.269    | 2.8079 | 0.2717 | 1245.66 | 1246.495 | 4978   | 1 | 580.5  | 65   | 1 K.PVHLTAFLGYK.A                                                                                                                                 |
|               | HsFlag-NUFIP_Ti_106.269    | 3.0391 | 0.271  | 1246.5  | 1246.495 | 6114.4 | 1 | 1156.6 | 90   | 2 K.PVHLTAFLGYK.A                                                                                                                                 |
|               | HsFlag-NUFIP_Ti_106.269    | 2.8107 | 0.2026 | 885.35  | 885.072  | 6106.8 | 1 | 922.4  | 92.9 | 3 K.AGMTHIVR.E                                                                                                                                    |
|               | HsFLAG-TCF3_Ti_106.269     | 2.4432 | 0.33   | 1435.42 | 1436.527 | 7822.8 | 1 | 759.9  | 59.1 | 1 K.TVFAEHISDECK.R                                                                                                                                |
|               | HsFlag-les6_293_Ti_106.269 | 4.3793 | 0.4165 | 1436.43 | 1436.527 | 7493.7 | 1 | 1516.8 | 77.3 | 3 K.TVFAEHISDECK.R                                                                                                                                |
|               | HsFLAG-TCF3_Ti_106.269     | 2.8895 | 0.2963 | 1592.34 | 1592.715 | 4290.2 | 3 | 300.2  | 58.3 | 2 K.TVFAEHISDECKR.R                                                                                                                               |
|               | HsFLAG-ARP6_Ti_106.269     | 5.3632 | 0.3225 | 2972.21 | 2973.371 | 5804.2 | 1 | 953.4  | 34   | 12 R.ERLEQQVPVNQVFGQDEMIDVIGVK.G                                                                                                                  |
|               | HsFLAG-TCF3_Ti_106.269     | 2.5634 | 0.0995 | 2686.2  | 2688.068 | 8932.3 | 3 | 390.4  | 34.8 | 1 R.LEQQVPVNQVFGQDEMIDVIGVK.G                                                                                                                     |
|               | HsFLAG-TCF3_Ti_106.269     | 2.885  | 0.3254 | 1342.28 | 1343.346 | 4127   | 1 | 403.9  | 68.2 | 2 K.NNASTDYDLSDK.S                                                                                                                                |
|               | HsFLAG-TCF3_Ti_106.269     | 3.3355 | 0.2174 | 1344.58 | 1343.346 | 5415.3 | 1 | 763.7  | 72.7 | 4 K.NNASTDYDLSDK.S                                                                                                                                |
|               | HsFLAG-ARP6_Ti_106.269     | 4.9234 | 0.5678 | 2439.12 | 2438.803 | 8481.2 | 1 | 1326.1 | 52.4 | 9 K.SINPLGGFVHYGEVTNDFVMLK.G                                                                                                                      |
| gi 88983853 r |                            | 9      | 38     | 27.30%  | 282      | 29700  |   |        |      | 7.3 PREDICTED: similar to Heterogeneous nuclear ribonucleoprotein A1 (Helix-destabilizing protein) (Single-strand binding protein) [Homo sapiens] |
| gi 88988325 r |                            | 9      | 38     | 27.50%  | 280      | 29862  |   |        |      | 7.3 PREDICTED: similar to Heterogeneous nuclear ribonucleoprotein A1 (Helix-destabilizing protein) (Single-strand binding protein) [Homo sapiens] |
| gi 88988321 r |                            | 9      | 38     | 25.30%  | 304      | 32483  |   |        |      | 7.7 PREDICTED: similar to Heterogeneous nuclear ribonucleoprotein A1 (Helix-destabilizing protein) (Single-strand binding protein) [Homo sapiens] |
| gi 88988318 r |                            | 9      | 38     | 27.40%  | 281      | 30152  |   |        |      | 7.6 PREDICTED: similar to Heterogeneous nuclear ribonucleoprotein A1 (Helix-destabilizing protein) (Single-strand binding protein) [Homo sapiens] |
| gi 88988315 r |                            | 9      | 38     | 26.20%  | 294      | 31200  |   |        |      | 7.6 PREDICTED: similar to Heterogeneous nuclear ribonucleoprotein A1 (Helix-destabilizing protein) (Single-strand binding protein) [Homo sapiens] |
| gi 88988312 r |                            | 9      | 38     | 32.00%  | 241      | 26480  |   |        |      | 8.7 PREDICTED: similar to Heterogeneous nuclear ribonucleoprotein A1 (Helix-destabilizing protein) (Single-strand binding protein) [Homo sapiens] |
| gi 88983868 r |                            | 9      | 38     | 28.70%  | 268      | 28363  |   |        |      | 7.1 PREDICTED: similar to Heterogeneous nuclear ribonucleoprotein A1 (Helix-destabilizing protein) (Single-strand binding protein) [Homo sapiens] |
| gi 88983865 r |                            | 9      | 38     | 26.40%  | 292      | 30983  |   |        |      | 7.3 PREDICTED: similar to Heterogeneous nuclear ribonucleoprotein A1 (Helix-destabilizing protein) (Single-strand binding protein) [Homo sapiens] |
| gi 88983863 r |                            | 9      | 38     | 28.60%  | 269      | 28652  |   |        |      | 7.3 PREDICTED: similar to Heterogeneous nuclear ribonucleoprotein A1 (Helix-destabilizing protein) (Single-strand binding protein) [Homo sapiens] |
| gi 88983861 r |                            | 9      | 38     | 27.30%  | 282      | 29700  |   |        |      | 7.3 PREDICTED: similar to Heterogeneous nuclear ribonucleoprotein A1 (Helix-destabilizing protein) (Single-strand binding protein) [Homo sapiens] |
| gi 88983858 r |                            | 9      | 38     | 33.60%  | 229      | 24980  |   |        |      | 8.4 PREDICTED: similar to Heterogeneous nuclear ribonucleoprotein A1 (Helix-destabilizing protein) (Single-strand binding protein) [Homo sapiens] |
|               | HsFLAG-p53-DNA-D           | 5.3975 | 0.5236 | 2148.33 | 2149.383 | 10346  | 1 | 1878.8 | 60.5 | 7 R.GFGFVTYATVEEVDAAMNAR.P                                                                                                                        |
|               | HsFlag-VPS71_Ti_106.269    | 4.819  | 0.4507 | 2511.61 | 2511.814 | 7887.6 | 1 | 891.3  | 45.5 | 4 R.GFGFVTYATVEEVDAAMNARPHK.V                                                                                                                     |

|               |                    |        |        |         |          |        |   |        |      |    |                                                                                                 |
|---------------|--------------------|--------|--------|---------|----------|--------|---|--------|------|----|-------------------------------------------------------------------------------------------------|
|               | HsFLAG-p53-DNA-D   | 3.6762 | 0.3178 | 2939.29 | 2939.275 | 6079.2 | 1 | 609.8  | 27.9 | 1  | R.GFGFVTYATVEEVDAAMNARPHKVDGR.V                                                                 |
|               | HsFLAG-Lin9_Ti_20  | 1.9907 | 0.1215 | 1437.61 | 1439.568 | 4567   | 1 | 387.3  | 50   | 1  | R.EDSERPGAHLTVK.K                                                                               |
|               | HsFLAG-p53-DNA-D   | 3.6907 | 0.1927 | 1220.14 | 1219.439 | 7676.3 | 1 | 1667.5 | 88.9 | 3  | K.IEVIEIMTDR.G                                                                                  |
|               | HsFlag-VPS71_Ti_10 | 3.9174 | 0.2864 | 1486.86 | 1486.553 | 7688.4 | 1 | 1598.8 | 81.8 | 14 | K.YHTVNGHNCEVR.K                                                                                |
|               | HsFLAG-Lin9_Ti_20  | 2.9389 | 0.1647 | 1613.63 | 1614.727 | 7325.1 | 1 | 1020.3 | 70.8 | 1  | K.YHTVNGHNCEVRK.A                                                                               |
|               | HsFlag-VPS71_Ti_10 | 2.7146 | 0.3137 | 1375.54 | 1376.468 | 7140   | 1 | 628.8  | 57.7 | 5  | R.SSGPYGGGGQYFAK.P                                                                              |
|               | HsFlag-VPS71_Ti_10 | 3.9291 | 0.3126 | 1377.7  | 1376.468 | 4784.6 | 1 | 826    | 73.1 | 2  | R.SSGPYGGGGQYFAK.P                                                                              |
| gi 5803227 re |                    | 5      | 16     | 27.30%  | 245      | 27764  |   |        |      |    | 4.8 tyrosine 3/tryptophan 5 -monooxygenase activation protein, theta polypeptide [Homo sapiens] |
| *             | HsFlag-FLJ90652_2  | 5.1215 | 0.3731 | 1533.06 | 1533.592 | 9087.1 | 1 | 2196.7 | 80.8 | 2  | K.AVTEQGAELSNEER.N                                                                              |
| *             | HsFLAG-ARP6_Ti_1   | 3.9315 | 0.3609 | 1392.74 | 1392.599 | 7309.1 | 1 | 1301.2 | 81.8 | 6  | R.SICTTVLELLDK.Y                                                                                |
| *             | HsFlag-FLJ90652_2  | 2.2161 | 0.0957 | 1320.64 | 1321.473 | 3472.2 | 1 | 251.2  | 63.6 | 1  | K.YLIANATNPESK.V                                                                                |
| *             | HsFlag-NUFIP_Ti_10 | 4.3829 | 0.3824 | 2146.5  | 2146.269 | 9362.6 | 1 | 1146.9 | 52.8 | 5  | K.TAFDEAIAELDTLNEDSYK.D                                                                         |
|               | HsFLAG-FLJ20729_   | 3.7624 | 0.1371 | 1189.5  | 1190.444 | 6163.6 | 5 | 1616.1 | 88.9 | 2  | K.DSTLIMQLLR.D                                                                                  |
| gi 34740329 r |                    | 9      | 31     | 27.20%  | 378      | 39595  |   |        |      |    | 9 heterogeneous nuclear ribonucleoprotein A3 [Homo sapiens]                                     |
|               | HsFLAG-p53-DNA-D   | 3.9132 | 0.2993 | 1777.94 | 1777.891 | 3752.1 | 1 | 572.7  | 67.9 | 1  | R.RGEEGHDPKEPEQLR.K                                                                             |
|               | HsFLAG-p53-DNA-D   | 2.7316 | 0.1269 | 1772.11 | 1771.965 | 8658.5 | 1 | 502.7  | 46.7 | 1  | K.LFIGGLSFETTDDSLR.E                                                                            |
|               | HsFLAG-p53-DNA-D   | 3.6475 | 0.2575 | 2442.24 | 2442.687 | 9603   | 1 | 816.1  | 42.5 | 1  | K.LFIGGLSFETTDDSLREHFEK.W                                                                       |
|               | HsFLAG-p53-DNA-D   | 2.1595 | 0.113  | 1380.59 | 1381.572 | 3881.9 | 2 | 380.7  | 58.3 | 1  | R.EDSVKPGAHLTVK.K                                                                               |
|               | HsFLAG-p53-DNA-D   | 3.2006 | 0.2159 | 1381.63 | 1381.572 | 4205.4 | 1 | 573.7  | 75   | 5  | R.EDSVKPGAHLTVK.K                                                                               |
|               | HsFLAG-p53-DNA-D   | 5.5285 | 0.4202 | 2011.71 | 2012.27  | 8142.8 | 1 | 2395.8 | 78.1 | 2  | K.KIFVGGIKEDTEEYNLR.D                                                                           |
|               | HsFLAG-ARP6_Ti_1   | 5.033  | 0.4053 | 1883.55 | 1884.096 | 6764.5 | 1 | 1528.2 | 73.3 | 5  | K.IFVGGIKEDTEEYNLR.D                                                                            |
|               | HsFLAG-p53-DNA-D   | 4.583  | 0.4053 | 1714.27 | 1714.828 | 5890.2 | 1 | 1426.3 | 78.6 | 7  | R.GFAFVTFDDHDTVDK.I                                                                             |
| *             | HsFLAG-p53-DNA-D   | 5.2172 | 0.5395 | 1911.28 | 1911.896 | 6582.2 | 1 | 1356   | 61.9 | 8  | R.SSGSPYGGGYGSGGGSGGYGSR.R                                                                      |
| gi 4506617 re |                    | 5      | 25     | 27.20%  | 184      | 21397  |   |        |      |    | 10.2 ribosomal protein L17 [Homo sapiens]                                                       |
| gi 89039066 r |                    | 5      | 25     | 27.20%  | 184      | 21313  |   |        |      |    | 10.1 PREDICTED: similar to 60S ribosomal protein L17 (L23) isoform 5 [Homo sapiens]             |
| gi 89039064 r |                    | 5      | 25     | 27.20%  | 184      | 21313  |   |        |      |    | 10.1 PREDICTED: similar to 60S ribosomal protein L17 (L23) isoform 4 [Homo sapiens]             |
| gi 89039062 r |                    | 5      | 25     | 27.20%  | 184      | 21313  |   |        |      |    | 10.1 PREDICTED: similar to 60S ribosomal protein L17 (L23) isoform 3 [Homo sapiens]             |
| gi 89039060 r |                    | 5      | 25     | 27.20%  | 184      | 21313  |   |        |      |    | 10.1 PREDICTED: similar to 60S ribosomal protein L17 (L23) isoform 2 [Homo sapiens]             |
| gi 89039058 r |                    | 5      | 25     | 27.20%  | 184      | 21313  |   |        |      |    | 10.1 PREDICTED: similar to 60S ribosomal protein L17 (L23) isoform 1 [Homo sapiens]             |
| gi 89038352 r |                    | 5      | 25     | 27.20%  | 184      | 21313  |   |        |      |    | 10.1 PREDICTED: similar to 60S ribosomal protein L17 (L23) isoform 2 [Homo sapiens]             |
| gi 89038350 r |                    | 5      | 25     | 27.20%  | 184      | 21313  |   |        |      |    | 10.1 PREDICTED: similar to 60S ribosomal protein L17 (L23) isoform 1 [Homo sapiens]             |
| gi 88947794 r |                    | 5      | 25     | 27.20%  | 184      | 21399  |   |        |      |    | 10.1 PREDICTED: similar to 60S ribosomal protein L17 (L23) isoform 2 [Homo sapiens]             |
| gi 88947792 r |                    | 5      | 25     | 27.20%  | 184      | 21399  |   |        |      |    | 10.1 PREDICTED: similar to 60S ribosomal protein L17 (L23) isoform 1 [Homo sapiens]             |
| gi 88943958 r |                    | 5      | 25     | 27.20%  | 184      | 21455  |   |        |      |    | 10.2 PREDICTED: similar to 60S ribosomal protein L17 (L23) isoform 6 [Homo sapiens]             |
| gi 88943956 r |                    | 5      | 25     | 27.20%  | 184      | 21455  |   |        |      |    | 10.2 PREDICTED: similar to 60S ribosomal protein L17 (L23) isoform 5 [Homo sapiens]             |
| gi 88943954 r |                    | 5      | 25     | 27.20%  | 184      | 21455  |   |        |      |    | 10.2 PREDICTED: similar to 60S ribosomal protein L17 (L23) isoform 4 [Homo sapiens]             |
| gi 88943952 r |                    | 5      | 25     | 27.20%  | 184      | 21455  |   |        |      |    | 10.2 PREDICTED: similar to 60S ribosomal protein L17 (L23) isoform 3 [Homo sapiens]             |
| gi 88943950 r |                    | 5      | 25     | 27.20%  | 184      | 21455  |   |        |      |    | 10.2 PREDICTED: similar to 60S ribosomal protein L17 (L23) isoform 2 [Homo sapiens]             |
| gi 88943948 r |                    | 5      | 25     | 27.20%  | 184      | 21455  |   |        |      |    | 10.2 PREDICTED: similar to 60S ribosomal protein L17 (L23) isoform 1 [Homo sapiens]             |
| gi 88942753 r |                    | 5      | 25     | 27.20%  | 184      | 21399  |   |        |      |    | 10.1 PREDICTED: similar to 60S ribosomal protein L17 (L23) isoform 2 [Homo sapiens]             |
| gi 88942751 r |                    | 5      | 25     | 27.20%  | 184      | 21399  |   |        |      |    | 10.1 PREDICTED: similar to 60S ribosomal protein L17 (L23) isoform 1 [Homo sapiens]             |
|               | HsFLAG-TCF3_Ti_10  | 2.0848 | 0.0929 | 1163.51 | 1164.257 | 4934.9 | 5 | 337.3  | 61.1 | 1  | R.YSLDPENPTK.S                                                                                  |
|               | HsFLAG-TCF3_Ti_10  | 2.8854 | 0.1696 | 1188.53 | 1189.458 | 4935.8 | 3 | 662    | 72.2 | 2  | K.SAEFLLHMLK.N                                                                                  |

|               |                   |        |        |         |          |                                                                   |   |        |      |                                        |
|---------------|-------------------|--------|--------|---------|----------|-------------------------------------------------------------------|---|--------|------|----------------------------------------|
|               | HsFLAG-ARP6_Ti_1  | 3.963  | 0.2328 | 1190.16 | 1189.458 | 6824.3                                                            | 1 | 1316.6 | 83.3 | 7 K.SAEFLHMLK.N                        |
|               | HsFLAG-ARP6_Ti_1  | 5.0694 | 0.4051 | 1779.5  | 1780.031 | 7365.1                                                            | 1 | 1490.2 | 66.7 | 13 K.GLDVDSLVIIEHIQVNK.A               |
|               | HsFLAG-ARP6_Ti_1  | 3.4639 | 0.1992 | 1624.45 | 1624.831 | 3983.5                                                            | 1 | 792.3  | 80.8 | 2 K.EQIVPKPEEEVAQK.K                   |
| gi 4759154 re | 6                 | 10     | 27.10% | 258     | 28970    | 5.8 synaptosomal-associated protein 29 [Homo sapiens]             |   |        |      |                                        |
| *             | HsFLAG-TCF3_Ti_1  | 3.5526 | 0.3651 | 1118.91 | 1118.232 | 6637.6                                                            | 1 | 1010.4 | 80   | 2 K.VGVASSEELAR.Q                      |
| *             | HsFLAG-TCF3_Ti_1  | 2.2149 | 0.1893 | 1230.55 | 1231.437 | 8493.3                                                            | 6 | 467.6  | 55   | 1 K.SVFGGLVNYFK.S                      |
| *             | HsFLAG-TCF3_Ti_1  | 3.2331 | 0.2242 | 1231.27 | 1231.437 | 6363.5                                                            | 1 | 1215   | 85   | 2 K.SVFGGLVNYFK.S                      |
| *             | HsFLAG-TCF3_Ti_1  | 4.1324 | 0.4672 | 2294.47 | 2295.471 | 5394                                                              | 1 | 881.6  | 57.5 | 2 K.SKPVETPPEQNGTLTSQPNNR.L            |
| *             | HsFLAG-TCF3_Ti_1  | 3.0227 | 0.294  | 1256.51 | 1256.373 | 6311.4                                                            | 1 | 1280.8 | 75   | 1 R.GAGSAMSTDAYPK.N                    |
| *             | HsFLAG-TCF3_Ti_1  | 5.2348 | 0.4119 | 1520.97 | 1520.698 | 7376.7                                                            | 1 | 1811   | 80.8 | 2 K.IDSNLDELMSGLGR.L                   |
| gi 5031635 re | 4                 | 10     | 27.10% | 166     | 18502    | 8.1 cofilin 1 (non-muscle) [Homo sapiens]                         |   |        |      |                                        |
|               | HsFlag-VPS71_Ti_1 | 4.6721 | 0.4128 | 1991.18 | 1991.337 | 7052.4                                                            | 1 | 954    | 56.2 | 7 K.KEDLVFIFWAPESAPLK.S                |
| *             | HsFLAG-FLJ20729_  | 4.1518 | 0.2757 | 1521.44 | 1520.605 | 7297.8                                                            | 1 | 1599.4 | 81.8 | 1 K.HELQANCYEEVK.D                     |
| *             | HsFLAG-FLJ20729_  | 3.1582 | 0.1549 | 1791.03 | 1791.881 | 9505.7                                                            | 2 | 656.5  | 53.8 | 1 K.HELQANCYEEVKDR.C                   |
| *             | HsFlag-VPS71_Ti_1 | 2.8484 | 0.168  | 1342.5  | 1341.591 | 4335.9                                                            | 3 | 723.6  | 69.2 | 1 K.LGGSAVISLEGKPL.-                   |
| gi 5032007 re | 5                 | 18     | 27.00% | 322     | 34911    | 6.4 purine-rich element binding protein A [Homo sapiens]          |   |        |      |                                        |
| *             | HsFlag-NUFIP_Ti_1 | 4.3223 | 0.2447 | 3271.56 | 3272.511 | 5789.8                                                            | 1 | 972.4  | 33   | 3 R.DYLGDFIEHYAQLGPSQPPDLAQQDEPR.R     |
| *             | HsFLAG-ARP6_Ti_1  | 5.7648 | 0.5501 | 2311.75 | 2312.631 | 4748.1                                                            | 1 | 1000   | 59.1 | 9 R.GPGLGSTQGQTIALPAQGLIEFR.D          |
| *             | HsFlag-NUFIP_Ti_1 | 3.9981 | 0.3294 | 2312.83 | 2312.631 | 6763.8                                                            | 2 | 787.6  | 31.8 | 2 R.GPGLGSTQGQTIALPAQGLIEFR.D          |
| *             | HsFlag-NUFIP_Ti_1 | 3.3294 | 0.3332 | 2734.08 | 2734.928 | 6869.8                                                            | 1 | 900.9  | 43.8 | 2 K.LIDDYGVVEEPAELPEGTSLTVDNK.R        |
| *             | HsFlag-NUFIP_Ti_1 | 2.9155 | 0.1773 | 1216.74 | 1217.37  | 6221.5                                                            | 3 | 673.8  | 72.2 | 2 K.RFFFDVGSNK.Y                       |
| gi 5803167 re | 9                 | 30     | 26.90% | 501     | 58849    | 5.4 splicing factor 3a, subunit 3 [Homo sapiens]                  |   |        |      |                                        |
| *             | HsFLAG-p53-DNA-D  | 4.2435 | 0.3519 | 2227.4  | 2229.411 | 7021.7                                                            | 1 | 846.2  | 52.8 | 1 R.KEELNAISGPNFAEFYNR.L               |
| *             | HsFlag-VPS71_Ti_1 | 3.5167 | 0.2326 | 2641.65 | 2641.724 | 8581.1                                                            | 1 | 1139.8 | 31.8 | 1 K.ARENPSEEAQNLVEFTDEEGYGR.Y          |
| *             | HsFLAG-Lin9_Ti_20 | 3.9509 | 0.2987 | 2642.5  | 2641.724 | 6284.5                                                            | 1 | 571.3  | 43.2 | 1 K.ARENPSEEAQNLVEFTDEEGYGR.Y          |
| *             | HsFlag-VPS71_Ti_1 | 2.736  | 0.2941 | 1340.5  | 1340.485 | 6823.1                                                            | 1 | 1033.6 | 77.8 | 1 R.YLDLHDCYLK.Y                       |
| *             | HsFlag-VPS71_Ti_1 | 5.2887 | 0.5112 | 2205.18 | 2205.555 | 7996.2                                                            | 1 | 1902.5 | 70.6 | 12 K.LDYITYLSIFDQLFDIPK.E              |
| *             | HsFLAG-p53-DNA-D  | 3.4371 | 0.1635 | 1516.5  | 1516.737 | 4490.9                                                            | 1 | 589.7  | 66.7 | 8 R.VKPLQDQNELFGK.I                    |
| *             | HsFlag-VPS71_Ti_1 | 6.4112 | 0.4801 | 3274.21 | 3273.54  | 9321.6                                                            | 1 | 2327.7 | 35.8 | 1 K.ETSSALTHAGAHLDLSAFSSWEELASLGLDR.L  |
| *             | HsARP6-FLAG_Ti_1  | 3.8766 | 0.2629 | 1310.87 | 1311.475 | 6772.5                                                            | 1 | 1294.6 | 81.8 | 1 K.SLESLDTSLFAK.N                     |
| *             | HsARP6-FLAG_Ti_1  | 2.8243 | 0.2016 | 1134.47 | 1134.24  | 4921.5                                                            | 1 | 620.1  | 81.2 | 4 R.HLTHENVQR.K                        |
| gi 31083035 r | 1                 | 3      | 26.80% | 123     | 13664    | 10.3 mitochondrial ribosomal protein L52 isoform a [Homo sapiens] |   |        |      |                                        |
| gi 31083060 r | 1                 | 3      | 27.00% | 122     | 13593    | 10.3 mitochondrial ribosomal protein L52 isoform c [Homo sapiens] |   |        |      |                                        |
|               | HsFlag-NUFIP_Ti_1 | 4.6927 | 0.2965 | 3499.1  | 3499.923 | 4886.3                                                            | 1 | 1106.2 | 30.5 | 3 R.LQQGLAANPSGYPLTELPDWSYADGRPAPPMK.G |
| gi 5032161 re | 2                 | 2      | 26.80% | 112     | 12473    | 4.8 elongin C [Homo sapiens]                                      |   |        |      |                                        |
|               | HsFlag-VPS71_Ti_1 | 2.2145 | 0.1723 | 1056.48 | 1057.192 | 3922                                                              | 1 | 353.2  | 72.2 | 1 R.EHALTSGTIK.A                       |
| *             | HsFlag-VPS71_Ti_1 | 3.8908 | 0.5521 | 2211.93 | 2212.398 | 8745.2                                                            | 1 | 834    | 47.4 | 1 K.AMLSGPGQAENETNEVNFR.E              |
| gi 18375501 r | 5                 | 12     | 26.70% | 318     | 35554    | 8.1 APEX nuclease [Homo sapiens]                                  |   |        |      |                                        |
| gi 18375505 r | 5                 | 12     | 26.70% | 318     | 35554    | 8.1 APEX nuclease [Homo sapiens]                                  |   |        |      |                                        |
| gi 18375503 r | 5                 | 12     | 26.70% | 318     | 35554    | 8.1 APEX nuclease [Homo sapiens]                                  |   |        |      |                                        |
|               | HsFLAG-Lin9_Ti_20 | 3.2772 | 0.241  | 1787.29 | 1787.878 | 7504.6                                                            | 1 | 660    | 50   | 1 K.GAVAEDGDELRTPEAK.K                 |
|               | HsFLAG-p53-DNA-D  | 1.9101 | 0.1388 | 1086.54 | 1087.261 | 6093.4                                                            | 1 | 651.3  | 75   | 1 K.TSPSGKPATLK.I                      |
|               | HsFLAG-FLJ20729_  | 4.9652 | 0.3489 | 2467.39 | 2467.74  | 7658.9                                                            | 1 | 1133.6 | 35.7 | 1 K.LPAELQELPGLSHQYWSAPSDK.E           |

|             |                     |        |        |         |          |                                                                   |                                                                 |        |      |    |                                   |  |
|-------------|---------------------|--------|--------|---------|----------|-------------------------------------------------------------------|-----------------------------------------------------------------|--------|------|----|-----------------------------------|--|
|             | HsFLAG-p53-DNA-D    | 3.8049 | 0.2968 | 1849.59 | 1849.097 | 6808.8                                                            | 2                                                               | 522.4  | 50   | 4  | R.QGFGELLQAVPLADSF.R.H            |  |
|             | HsFlag-VPS71_Ti_10  | 4.0965 | 0.4311 | 2094.05 | 2093.394 | 5977.8                                                            | 1                                                               | 1125.2 | 61.8 | 5  | R.LDYFLLSHSLLPALCDSK.I            |  |
| gi 38201655 | 11                  | 50     | 26.60% | 418     | 46743    | 6.3 inhibitor of growth family, member 3 isoform 1 [Homo sapiens] |                                                                 |        |      |    |                                   |  |
|             | HsTIP60_Ti_105.256  | 5.0108 | 0.3715 | 1948.35 | 1949.161 | 9198.7                                                            | 1                                                               | 2393.7 | 76.7 | 5  | R.EMDLQVQNAMDQLEQR.V              |  |
|             | HsMRGBP-FLAG_Ti_10  | 2.4827 | 0.2177 | 1072.7  | 1073.252 | 5076.9                                                            | 2                                                               | 618.6  | 75   | 4  | R.VSEFFMNAK.K                     |  |
|             | HsMRGBP-FLAG_Ti_10  | 3.0106 | 0.2275 | 1073.51 | 1073.252 | 5493.8                                                            | 1                                                               | 1253.1 | 87.5 | 2  | R.VSEFFMNAK.K                     |  |
| *           | HsMRGBP-FLAG_Ti_10  | 2.6887 | 0.2746 | 1547.65 | 1547.751 | 5210.3                                                            | 3                                                               | 329.6  | 54.2 | 1  | K.VQLANQIYDLVDR.H                 |  |
| *           | HsH2AZ-FLAG_293_2   | 4.9793 | 0.4097 | 1548.73 | 1547.751 | 7590.6                                                            | 1                                                               | 2108.6 | 87.5 | 12 | K.VQLANQIYDLVDR.H                 |  |
| *           | HsYL1-FLAG_Ti_203   | 2.7177 | 0.1597 | 1806.17 | 1805.01  | 10080                                                             | 3                                                               | 770.2  | 53.3 | 1  | K.MELEDNAGITEILER.R               |  |
| *           | HsFLAG-TIP49b_Ti_10 | 3.5506 | 0.3249 | 1878.41 | 1878.996 | 7335.1                                                            | 1                                                               | 969.1  | 60   | 7  | K.YNPTSHHTTTDHIPEK.K              |  |
| *           | HsTIP60_Ti_103.218  | 2.3074 | 0.2857 | 1422.56 | 1423.56  | 7497.1                                                            | 1                                                               | 377.2  | 46.2 | 1  | K.SEALLSTLTS DASK.E               |  |
| *           | HsTIP60_Ti_103.217  | 5.3422 | 0.4463 | 1423.55 | 1423.56  | 6697.1                                                            | 1                                                               | 1971.7 | 88.5 | 13 | K.SEALLSTLTS DASK.E               |  |
| *           | HsTIP60_Ti_104.254  | 4.2774 | 0.5245 | 2722.71 | 2723.882 | 6778.3                                                            | 1                                                               | 646.2  | 36.5 | 3  | R.ETVGYSSSSALMTTLTQNASSSAADSR.S   |  |
| *           | HsTIP60_Ti_104.254  | 3.7521 | 0.1769 | 2723.9  | 2723.882 | 9770.1                                                            | 1                                                               | 709.4  | 24   | 1  | R.ETVGYSSSSALMTTLTQNASSSAADSR.S   |  |
| gi 4507195  | re                  | 40     | 148    | 26.40%  | 2364     | 274630                                                            | 5.6 spectrin, beta, non-erythrocytic 1 isoform 1 [Homo sapiens] |        |      |    |                                   |  |
|             | HsFlag-VPS71_Ti_10  | 2.4092 | 0.2143 | 1127.48 | 1128.237 | 5689.4                                                            | 6                                                               | 523.7  | 68.8 | 1  | R.IHCLENVDK.A                     |  |
|             | HsFLAG-ARP6_Ti_10   | 3.9058 | 0.4131 | 1978.1  | 1979.162 | 7365.7                                                            | 1                                                               | 1205.9 | 65.6 | 9  | K.TAGYPNVNIHNFTTSWR.D             |  |
|             | HsFlag-VPS71_Ti_10  | 5.8347 | 0.4698 | 2485.94 | 2484.734 | 7278.9                                                            | 1                                                               | 2154.6 | 44   | 2  | K.SNAHYLNQNAFNLAEQHLGLTK.L        |  |
|             | HsFLAG-UTX1_Ti_20   | 2.6734 | 0.1132 | 1722.64 | 1722.846 | 5480.1                                                            | 2                                                               | 449.8  | 60.7 | 1  | K.LLDPEDISVDHPDEK.S               |  |
|             | HsFLAG-ARP6_Ti_10   | 5.8337 | 0.5002 | 2184.87 | 2185.447 | 8103.3                                                            | 1                                                               | 2540   | 75   | 7  | K.FANSLVGVQQQLQAFNTYR.T           |  |
|             | HsFLAG-ARP6_Ti_10   | 4.9833 | 0.4833 | 2022.62 | 2023.25  | 5620.6                                                            | 1                                                               | 778.2  | 55.6 | 13 | R.LVSQDNFGFDLPAVEAATK.K           |  |
|             | HsARP6-FLAG_Ti_10   | 4.3084 | 0.2431 | 1348.31 | 1348.628 | 6747.1                                                            | 1                                                               | 1597   | 88.9 | 12 | R.LWEYLLELLR.A                    |  |
|             | HsARP6-FLAG_Ti_10   | 3.994  | 0.2146 | 1265.81 | 1265.495 | 4291.1                                                            | 1                                                               | 1082.5 | 90   | 4  | K.HLLGVEDLLQK.H                   |  |
|             | HsARP6-FLAG_Ti_10   | 4.2381 | 0.3312 | 1558.58 | 1558.734 | 9915.6                                                            | 1                                                               | 1638.3 | 75   | 2  | R.EQWANLEQLSAIR.K                 |  |
|             | HsFlag-VPS71_Ti_10  | 3.7175 | 0.283  | 3161.41 | 3158.553 | 7243.9                                                            | 1                                                               | 1131.1 | 31.7 | 1  | K.RLEEASLLHQFQADADDIDAWMLDILK.I   |  |
|             | HsFLAG-Lin9_Ti_20   | 3.2087 | 0.2865 | 2050.4  | 2052.202 | 8910.3                                                            | 3                                                               | 545.5  | 41.7 | 1  | K.IVSSSDVGHDEYSTQSLVK.K           |  |
|             | HsFlag-DPCD_Ti_20   | 3.903  | 0.3592 | 2133.04 | 2131.409 | 7473.1                                                            | 1                                                               | 834    | 52.6 | 1  | K.VIESTQDLGNDLAGVMALQR.K          |  |
|             | HsFlag-VPS71_Ti_10  | 3.835  | 0.3949 | 1451.38 | 1450.647 | 4887.5                                                            | 1                                                               | 945.8  | 77.3 | 1  | R.LAEISDVVEEMK.T                  |  |
|             | HsARP6-FLAG_Ti_10   | 4.7149 | 0.2015 | 1382.18 | 1382.472 | 8808.4                                                            | 1                                                               | 1929.5 | 85   | 3  | R.DLDDFQSWLSR.T                   |  |
|             | HsFlag-VPS71_Ti_10  | 2.7367 | 0.1572 | 1096.58 | 1096.272 | 5870.3                                                            | 2                                                               | 738.5  | 81.2 | 3  | K.LLTQHENIK.N                     |  |
|             | HsFLAG-p53-DNA-D    | 3.5841 | 0.1503 | 1525.36 | 1525.704 | 8511                                                              | 1                                                               | 1503.5 | 75   | 3  | R.LQALDTGWNELHK.M                 |  |
|             | HsFLAG-Lin9_Ti_20   | 3.7793 | 0.3387 | 1833.76 | 1834.045 | 7177.1                                                            | 1                                                               | 610.3  | 50   | 4  | R.QNLLSQSHAYQQFLR.D               |  |
|             | HsFlag-VPS71_Ti_10  | 5.1452 | 0.4389 | 3292.67 | 3291.657 | 6678.8                                                            | 1                                                               | 1245.2 | 31   | 1  | K.QAEAFNNQEYVLAHTEMPTTLEGAEAAIK.K |  |
|             | HsFlag-DPCD_Ti_20   | 3.1456 | 0.2549 | 1888    | 1889.171 | 7209.3                                                            | 4                                                               | 553    | 46.9 | 1  | K.EGMQLISEKPETEAVVK.E             |  |
|             | HsFLAG-ARP6_Ti_10   | 4.1616 | 0.4588 | 1876.28 | 1877.02  | 7875                                                              | 1                                                               | 2085.9 | 80   | 2  | K.WLHGLESQIQSDDYQK.H              |  |
|             | HsFLAG-ARP6_Ti_10   | 3.0331 | 0.2173 | 1391.23 | 1391.625 | 6010.9                                                            | 4                                                               | 702.7  | 65   | 1  | K.FMELLEPLNER.K                   |  |
|             | HsARP6-FLAG_Ti_10   | 2.9357 | 0.2571 | 1459.96 | 1460.583 | 7305.1                                                            | 1                                                               | 1211.4 | 72.7 | 1  | R.DVEDEILWVGER.M                  |  |
|             | HsFlag-VPS71_Ti_10  | 3.1213 | 0.2154 | 2318.1  | 2318.697 | 8690.4                                                            | 1                                                               | 865.5  | 47.5 | 1  | R.MPLATSTDHGHNLQTVQLLIK.K         |  |
|             | HsFlag-DPCD_Ti_20   | 3.8203 | 0.4453 | 1778.72 | 1778.914 | 8864.8                                                            | 1                                                               | 1203.3 | 62.5 | 2  | R.SQNIVTDSSSLSAEAI.R.Q            |  |
|             | HsARP6-FLAG_Ti_10   | 3.056  | 0.2169 | 1460.16 | 1459.682 | 6490.3                                                            | 1                                                               | 758.5  | 72.7 | 3  | K.QLWGLLIEETEK.R                  |  |
|             | HsFlag-VPS71_Ti_10  | 6.7312 | 0.5129 | 2340.03 | 2339.567 | 8946.7                                                            | 1                                                               | 2686.4 | 47.4 | 5  | K.HQILEQAVEDYAETVHQLSK.T          |  |
|             | HsFLAG-ARP6_Ti_10   | 3.6478 | 0.3483 | 1310.83 | 1311.394 | 6497.7                                                            | 1                                                               | 1131.9 | 77.3 | 8  | R.ALVADSHPESE.R.I                 |  |
|             | HsARP6-FLAG_Ti_10   | 3.8874 | 0.2454 | 1504.23 | 1503.609 | 10058.6                                                           | 1                                                               | 1526.7 | 72.7 | 2  | R.EVDDLEQWIAER.E                  |  |

|               |                    |        |        |         |          |         |                                                              |        |      |    |                               |
|---------------|--------------------|--------|--------|---------|----------|---------|--------------------------------------------------------------|--------|------|----|-------------------------------|
|               | HsFlag-VPS71_Ti_10 | 5.4804 | 0.3776 | 1944.84 | 1945.136 | 9377.4  | 1                                                            | 1820.8 | 65.6 | 12 | K.DGLNEAWADLLELIDTR.T         |
|               | HsFLAG-ARP6_Ti_1   | 3.5967 | 0.2017 | 1374.74 | 1374.58  | 7304.5  | 2                                                            | 1367.3 | 77.3 | 2  | R.TQILAASYELHK.F              |
|               | HsFlag-VPS71_Ti_10 | 3.0277 | 0.1819 | 1243.58 | 1242.464 | 6621.9  | 1                                                            | 1159.3 | 83.3 | 2  | R.LILEVHQFSR.D                |
|               | HsFLAG-ARP6_Ti_1   | 4.8381 | 0.2564 | 2094.13 | 2093.301 | 6466.1  | 1                                                            | 1364.5 | 61.1 | 8  | R.DASVAEAWLLGQEPYLSSR.E       |
|               | HsFLAG-ARP6_Ti_1   | 3.1934 | 0.1898 | 1188.42 | 1187.422 | 7137.4  | 1                                                            | 1364.5 | 94.4 | 1  | R.LTTLELLEVR.R                |
|               | HsFLAG-FLJ20729_   | 3.9777 | 0.3773 | 1752.34 | 1752.789 | 8803.2  | 1                                                            | 1491   | 67.9 | 2  | K.VSEEAESQQQWDTSK.G           |
| *             | HsFlag-DPCD_Ti_20  | 3.5354 | 0.3273 | 1368.06 | 1368.576 | 7631    | 1                                                            | 1032.9 | 69.2 | 4  | K.TALPAQSAATLPAR.T            |
| *             | HsFLAG-FLJ20729_   | 3.0914 | 0.2277 | 1709.2  | 1709.871 | 6944.1  | 1                                                            | 576.7  | 57.1 | 1  | R.TQETPSAQMEGLNR.K            |
| *             | HsFlag-VPS71_Ti_10 | 4.4939 | 0.4178 | 1757.57 | 1756.996 | 3519    | 1                                                            | 533.7  | 62.5 | 11 | K.TAASGIPYHSEVPVSLK.E         |
| *             | HsFLAG-FLJ20729_   | 4.9258 | 0.4618 | 2240.98 | 2241.388 | 8744.5  | 1                                                            | 1810.9 | 63.2 | 4  | K.DDEEMNTWQAISSAISDK.H        |
| *             | HsFLAG-p53-DNA-D   | 4.1166 | 0.4901 | 1545.4  | 1545.606 | 7109.4  | 1                                                            | 1011.6 | 67.9 | 3  | K.HEVSASTQSTPASSR.A           |
| *             | HsMRGBP-FLAG_Ti_   | 4.1401 | 0.4677 | 2060.93 | 2060.312 | 5964.2  | 1                                                            | 645.2  | 47.4 | 3  | R.AQTLPTSVMITSESSPGKR.E       |
| gi 4505763 re | 8                  | 29     | 26.40% | 417     | 44615    | 8.1     | phosphoglycerate kinase 1 [Homo sapiens]                     |        |      |    |                               |
| *             | HsFlag-VPS71_Ti_10 | 2.1703 | 0.0984 | 1247.67 | 1248.462 | 6214    | 2                                                            | 526.1  | 60   | 2  | K.YSLEPVAVELK.S               |
| *             | HsFlag-VPS71_Ti_10 | 5.7238 | 0.3543 | 1770.96 | 1770.005 | 6919.7  | 1                                                            | 2318.6 | 81.2 | 5  | K.ACANPAAGSVILLENLR.F         |
|               | HsFLAG-p53-DNA-D   | 4.8024 | 0.2986 | 1769.7  | 1770.082 | 7796.1  | 1                                                            | 1089   | 59.4 | 8  | K.ALESPERPFLAILGGAK.V         |
|               | HsFlag-VPS71_Ti_10 | 4.0334 | 0.325  | 1771.18 | 1770.082 | 4605.6  | 1                                                            | 932.2  | 46.9 | 2  | K.ALESPERPFLAILGGAK.V         |
| *             | HsFlag-VPS71_Ti_10 | 3.512  | 0.1671 | 1967.55 | 1968.186 | 4559.9  | 1                                                            | 508    | 52.9 | 1  | K.VLNNMEIGTSLFDEEGAK.I        |
| *             | HsH2AZ-FLAG_293_   | 2.9574 | 0.2477 | 2022.74 | 2024.278 | 7916.5  | 1                                                            | 854.1  | 52.9 | 1  | K.ITLPVDFVTADKFDENAK.T        |
| *             | HsFlag-VPS71_Ti_10 | 4.6202 | 0.4504 | 2107.15 | 2106.391 | 6948.1  | 1                                                            | 756.8  | 52.9 | 8  | K.QIVWNGPVGVFWEAFAR.G         |
| *             | HsH2AZ-FLAG_293_   | 3.3324 | 0.2919 | 1098.02 | 1098.285 | 6116.1  | 1                                                            | 1274.2 | 80   | 2  | K.VLPGVDALSNI.-               |
| gi 74099697 r | 9                  | 175    | 26.30% | 449     | 49264    | 6.3     | heterogeneous nuclear ribonucleoprotein H2 [Homo sapiens]    |        |      |    |                               |
| gi 9624998 re | 9                  | 175    | 26.30% | 449     | 49264    | 6.3     | heterogeneous nuclear ribonucleoprotein H2 [Homo sapiens]    |        |      |    |                               |
|               | HsFLAG-Lin9_Ti_20  | 4.61   | 0.2933 | 1685.59 | 1685.75  | 7123.9  | 1                                                            | 2387.3 | 56.7 | 4  | K.HTGNPSPDTANDGFVR.L          |
|               | HsFlag-NUFIP_Ti_10 | 4.405  | 0.4586 | 1685.6  | 1685.75  | 7380.1  | 1                                                            | 1743.8 | 76.7 | 40 | K.HTGNPSPDTANDGFVR.L          |
|               | HsFLAG-FLJ20309_   | 5.6045 | 0.4433 | 1844.33 | 1843     | 8624.1  | 1                                                            | 2117.4 | 71.9 | 80 | R.STGEAFVQFASQIEAEK.A         |
|               | HsMRGBP-FLAG_Ti_   | 3.4377 | 0.4497 | 2662.48 | 2661.629 | 7839.5  | 1                                                            | 556    | 36   | 1  | R.GAYGGYGGYDDYGGYNDGYGFGSDR.F |
|               | HsFLAG-ARP6_Ti_1   | 3.8358 | 0.4546 | 1603.44 | 1602.684 | 8040.3  | 1                                                            | 1209.8 | 75   | 3  | R.DLNYCFSGMSDHR.Y             |
|               | HsYL1_Ti_105.1435. | 3.4682 | 0.4336 | 2084.26 | 2085.181 | 5682.9  | 1                                                            | 836.5  | 52.8 | 1  | R.YGDGSSSFQSTTGHCVHMR.G       |
|               | HsFLAG-p53-DNA-D   | 4.5176 | 0.4033 | 2030.45 | 2030.262 | 9785.3  | 1                                                            | 1476.6 | 62.5 | 5  | R.ATENDIYNFFSPLNPMR.V         |
|               | HsFLAG-TCF3_Ti_10  | 2.9392 | 0.214  | 1092.51 | 1093.228 | 6901.6  | 1                                                            | 869.9  | 72.2 | 12 | R.VHIEIGPDGR.V                |
|               | HsFLAG-ARP6_Ti_1   | 3.664  | 0.2731 | 1093.44 | 1093.228 | 6216    | 1                                                            | 1638.1 | 88.9 | 29 | R.VHIEIGPDGR.V                |
| gi 4504517 re | 2                  | 3      | 26.30% | 205     | 22783    | 6.4     | heat shock 27kDa protein 1 [Homo sapiens]                    |        |      |    |                               |
| *             | HsSrcap_Ti_206.302 | 5.7307 | 0.5358 | 4094.93 | 4095.606 | 5989.8  | 1                                                            | 1414.3 | 29.7 | 2  | A                             |
| *             | HsFlag-VPS71_Ti_10 | 3.2368 | 0.3326 | 1784.71 | 1785.007 | 7517.9  | 1                                                            | 536.5  | 46.7 | 1  | R.VSLDVNHAFDELTVK.T           |
| gi 4507133 re | 2                  | 19     | 26.30% | 76      | 8496     | 8.9     | small nuclear ribonucleoprotein polypeptide G [Homo sapiens] |        |      |    |                               |
| *             | HsFlag-NUFIP_Ti_10 | 2.6236 | 0.1793 | 823.45  | 822.986  | 3427.4  | 2                                                            | 570.5  | 91.7 | 3  | R.HVQGILR.G                   |
| *             | HsFlag-NUFIP_Ti_10 | 4.1973 | 0.255  | 1446.18 | 1445.717 | 5822.2  | 3                                                            | 667.2  | 70.8 | 16 | R.GNSIIMLEALERV.-             |
| gi 17158044 r | 5                  | 9      | 26.10% | 249     | 28681    | 10.8    | ribosomal protein S6 [Homo sapiens]                          |        |      |    |                               |
| *             | HsFLAG-ARP6_Ti_1   | 3.2934 | 0.2133 | 1336    | 1336.497 | 3949.1  | 1                                                            | 707.6  | 77.3 | 2  | K.LNISFPATGCQK.L              |
| *             | HsFlag-NUFIP_Ti_10 | 3.062  | 0.1452 | 1116.24 | 1117.244 | 7392.8  | 5                                                            | 1090.2 | 87.5 | 1  | K.LIEVDDERK.L                 |
| *             | HsFLAG-ARP6_Ti_1   | 4.6454 | 0.2764 | 1777.38 | 1777.99  | 5931.8  | 1                                                            | 2345   | 80   | 2  | K.RMATEVAADALGEEWK.G          |
| *             | HsFlag-NUFIP_Ti_11 | 3.7333 | 0.2582 | 1829.11 | 1828.169 | 11608.2 | 1                                                            | 1042.5 | 53.1 | 2  | R.GCIVDANLSVLNLVIVK.K         |

|             |                    |        |        |         |          |         |   |        |      |    |                                                                                                             |
|-------------|--------------------|--------|--------|---------|----------|---------|---|--------|------|----|-------------------------------------------------------------------------------------------------------------|
| *           | HsFLAG-ARP6_Ti_1   | 3.6624 | 0.2772 | 1336.14 | 1336.487 | 3482.4  | 6 | 635.2  | 80   | 2  | K.LFNLSKEDDVR.Q                                                                                             |
| gi 47824889 |                    | 4      | 9      | 26.00%  | 154      | 17799   |   |        |      |    | 10.1 hypothetical protein LOC388272 [Homo sapiens]                                                          |
| *           | HsH2AZ-FLAG_293_   | 3.5122 | 0.3345 | 1678.17 | 1678.735 | 4634.3  | 2 | 714.1  | 73.1 | 2  | K.SCECDQQVPVACK.S                                                                                           |
| *           | HsH2AZ-FLAG_293_   | 3.6322 | 0.2337 | 1410.22 | 1410.521 | 5158.6  | 1 | 777.8  | 77.3 | 2  | K.EIDIYANLSDEK.A                                                                                            |
| *           | HsH2AZ-FLAG_293_   | 3.62   | 0.2672 | 1437.33 | 1437.682 | 9373.9  | 1 | 1562.7 | 75   | 1  | K.AFVFSVALAEINR.K                                                                                           |
| *           | HsH2AZ-FLAG_293_   | 3.8947 | 0.389  | 1565.77 | 1565.856 | 7031.2  | 1 | 937    | 65.4 | 4  | K.AFVFSVALAEINR.K                                                                                           |
| gi 10863945 |                    | 14     | 41     | 25.70%  | 732      | 82705   |   |        |      |    | 5.8 ATP-dependent DNA helicase II [Homo sapiens]                                                            |
| *           | HsFLAG-p53-DNA-D   | 4.9797 | 0.4033 | 1916.65 | 1916.196 | 4860.4  | 1 | 1287.1 | 76.7 | 5  | R.HMLPDFDLLEDIESK.I                                                                                         |
| *           | HsFlag-VPS71_Ti_1( | 3.6878 | 0.2262 | 1268.08 | 1267.511 | 6868    | 2 | 1352   | 80   | 1  | K.SQLDIIHSLK.K                                                                                              |
| *           | HsFLAG-p53-DNA-D   | 3.8363 | 0.224  | 1395.28 | 1395.685 | 9033.9  | 1 | 1623.3 | 77.3 | 2  | K.SQLDIIHSLK.K                                                                                              |
| *           | HsFlag-VPS71_Ti_1( | 4.4447 | 0.4853 | 2725.09 | 2725.086 | 6605.4  | 1 | 1407.3 | 50   | 1  | R.DDEAAAVALSLLIHALDDLDMAIVR.Y                                                                               |
| *           | HsFLAG-p53-DNA-D   | 7.5531 | 0.4602 | 2725.58 | 2725.086 | 10164.5 | 1 | 4151.8 | 45   | 1  | R.DDEAAAVALSLLIHALDDLDMAIVR.Y                                                                               |
| *           | HsFLAG-FLJ20729_   | 2.8376 | 0.2176 | 1534.43 | 1534.804 | 4507    | 1 | 534.9  | 61.5 | 1  | K.RANPQVGVAFFPHIK.H                                                                                         |
| *           | HsFLAG-Lin9_Ti_20( | 3.2257 | 0.3327 | 1377.72 | 1378.617 | 5337.3  | 1 | 500.6  | 58.3 | 4  | R.ANPQVGVAFFPHIK.H                                                                                          |
| *           | HsFLAG-p53-DNA-D   | 4.2216 | 0.2863 | 2450.55 | 2450.81  | 8400.1  | 1 | 1447.1 | 36.4 | 2  | K.KYAPTEAQLNAVDALIDMSLAK.K                                                                                  |
| *           | HsFLAG-p53-DNA-D   | 5.9375 | 0.4284 | 2451.82 | 2450.81  | 10030.3 | 1 | 2613.4 | 61.4 | 3  | K.KYAPTEAQLNAVDALIDMSLAK.K                                                                                  |
| *           | HsFlag-VPS71_Ti_1( | 4.8565 | 0.4331 | 2323.91 | 2322.636 | 6771.7  | 1 | 1008.6 | 52.4 | 8  | K.YAPTEAQLNAVDALIDMSLAK.K                                                                                   |
| *           | HsFLAG-FLJ20729_   | 4.0297 | 0.2357 | 1381.14 | 1381.522 | 6803.1  | 1 | 1341.1 | 81.8 | 3  | K.TDTLEDLFPPTK.I                                                                                            |
| *           | HsFLAG-FLJ20729_   | 4.2353 | 0.3472 | 3318.67 | 3318.639 | 8646.5  | 1 | 874.3  | 26.9 | 2  | K.ASFEEASNQLINHIEQFLDTNETPYFMK.S                                                                            |
| *           | HsFLAG-p53-DNA-D   | 4.844  | 0.3266 | 3633.38 | 3632.018 | 11673.8 | 1 | 1390.4 | 27.3 | 1  | K.QLNHFWEIVVQDGITLITKEEAGSSVTAEEAK.K                                                                        |
| *           | HsFlag-VPS71_Ti_1( | 4.1493 | 0.3794 | 2512.75 | 2510.686 | 6989.4  | 1 | 690.7  | 39.1 | 7  | K.DKPSGDTAAVFEEGGDVDDLLDMI.-                                                                                |
| gi 29837655 |                    | 7      | 11     | 25.70%  | 421      | 46089   |   |        |      |    | 10 DNA polymerase delta interacting protein 3 isoform 1 [Homo sapiens]                                      |
| *           | HsFLAG-FLJ20729_   | 4.7564 | 0.2297 | 2038.28 | 2038.398 | 5057.2  | 1 | 1473.2 | 47.4 | 1  | K.RSSPAAFINPPIGVTTPALK.L                                                                                    |
| *           | HsFlag-FLJ90652_2( | 2.8808 | 0.2189 | 1881.67 | 1882.21  | 9471.6  | 1 | 625    | 44.4 | 1  | R.SSPAAFINPPIGVTTPALK.L                                                                                     |
| *           | HsFlag-FLJ90652_2( | 3.4816 | 0.2671 | 1136.36 | 1137.284 | 7068.3  | 1 | 1262.1 | 88.9 | 1  | R.INVVNNHQAK.Q                                                                                              |
| *           | HsFLAG-p53-DNA-D   | 4.2535 | 0.3909 | 1805.4  | 1806.049 | 10098.5 | 1 | 1080.3 | 52.9 | 1  | K.FAASGGFLHHMAGLSSSK.L                                                                                      |
| *           | HsFLAG-Lin9_Ti_20( | 3.5821 | 0.3227 | 2787.39 | 2788.211 | 6350.9  | 8 | 350.4  | 24   | 1  | R.TLVNKEEPPKELPAAEPVLSPLEGTK.M                                                                              |
| *           | HsFLAG-Lin9_Ti_20( | 3.4364 | 0.2757 | 1393.94 | 1394.7   | 5009.1  | 1 | 707.1  | 70.8 | 3  | R.LVHPGVAEVVFK.K                                                                                            |
| *           | HsFlag-DPCD_Ti_20  | 3.4839 | 0.3176 | 2197.69 | 2198.395 | 5636.2  | 1 | 843.2  | 52.5 | 3  | R.RVNSASSSNPPAEVDPDTILK.A                                                                                   |
| gi 4507791  |                    | 2      | 3      | 25.70%  | 183      | 20900   |   |        |      |    | 7.7 ubiquitin-conjugating enzyme E2M [Homo sapiens]                                                         |
| *           | HsFLAG-FLJ20729_   | 3.9203 | 0.2848 | 1887.84 | 1888.004 | 7247.1  | 1 | 1254.8 | 70   | 2  | K.TCDISFSDPDDLLNFK.L                                                                                        |
| *           | HsFLAG-Lin9_Ti_20( | 3.9967 | 0.1931 | 3660.74 | 3661.189 | 8793.6  | 1 | 637.4  | 23.3 | 1  | R.EDWKPVLTINSIIYGLQYLFLEPNPEDPLNK.E                                                                         |
| gi 21328448 |                    | 5      | 21     | 25.60%  | 246      | 28082   |   |        |      |    | 4.8 tyrosine 3-monooxygenase/tryptophan 5-monooxygenase activation protein, beta polypeptide [Homo sapiens] |
| gi 4507949  |                    | 5      | 21     | 25.60%  | 246      | 28082   |   |        |      |    | 4.8 tyrosine 3-monooxygenase/tryptophan 5-monooxygenase activation protein, beta polypeptide [Homo sapiens] |
| *           | HsFLAG-ARP6_Ti_1   | 4.7483 | 0.3567 | 1598.58 | 1599.654 | 8318.8  | 1 | 1908   | 80.8 | 5  | K.AVTEQGHLSNEER.N                                                                                           |
| *           | HsFlag-VPS71_Ti_1( | 4.4063 | 0.2321 | 2390.02 | 2388.64  | 10357.1 | 1 | 892.6  | 44.7 | 6  | R.EKIEAELQDICNDVLELLDK.Y                                                                                    |
| *           | HsFLAG-Lin9_Ti_20( | 5.2316 | 0.3819 | 2131.18 | 2131.351 | 6143.2  | 1 | 1245.4 | 64.7 | 6  | K.IEAELQDICNDVLELLDK.Y                                                                                      |
| *           | HsFlag-VPS71_Ti_1( | 5.8257 | 0.4827 | 2160.67 | 2160.296 | 7279.1  | 1 | 1974.1 | 69.4 | 2  | K.TAFDEAIAELDTLNEESYK.D                                                                                     |
| *           | HsFLAG-FLJ20729_   | 3.7624 | 0.1371 | 1189.5  | 1190.444 | 6163.6  | 5 | 1616.1 | 88.9 | 2  | K.DSTLIMQLLR.D                                                                                              |
| gi 4506633  |                    | 5      | 16     | 25.60%  | 125      | 14463   |   |        |      |    | 10.5 ribosomal protein L31 [Homo sapiens]                                                                   |
| *           | HsFLAG-ARP6_Ti_1   | 2.6329 | 0.1465 | 914.17  | 914.098  | 5762.9  | 1 | 1038.9 | 92.9 | 2  | K.RIHGVGFK.K                                                                                                |
| *           | HsFLAG-ARP6_Ti_1   | 2.3237 | 0.1435 | 757.54  | 757.911  | 4178.7  | 2 | 464.4  | 75   | 2  | R.IHGVGFK.K                                                                                                 |
| *           | HsFLAG-p53-DNA-D   | 4.5191 | 0.4438 | 1645.94 | 1645.979 | 6059.4  | 1 | 1351.7 | 76.9 | 10 | K.LYTLVTVYVPVTTFK.N                                                                                         |

|               |                    |        |        |         |          |        |                                                                                       |        |      |    |                                     |
|---------------|--------------------|--------|--------|---------|----------|--------|---------------------------------------------------------------------------------------|--------|------|----|-------------------------------------|
| *             | HsFLAG-TCF3_Ti_10  | 2.0442 | 0.1341 | 1145.25 | 1146.199 | 7767.7 | 2                                                                                     | 555.6  | 72.2 | 1  | K.NLQTVNVNVDEN.-                    |
| *             | HsVPS71-FLAG_Ti_10 | 2.8461 | 0.1934 | 1146.29 | 1146.199 | 3807.1 | 1                                                                                     | 723.4  | 77.8 | 1  | K.NLQTVNVNVDEN.-                    |
| gij14670350 r | 18                 | 47     | 25.50% | 998     | 112416   | 6.4    | general transcription factor II, i isoform 1 [Homo sapiens]                           |        |      |    |                                     |
| gij14670356 r | 18                 | 47     | 26.50% | 957     | 108055   | 8.1    | general transcription factor II, i isoform 4 [Homo sapiens]                           |        |      |    |                                     |
| gij14670354 r | 18                 | 47     | 26.00% | 977     | 110106   | 7.4    | general transcription factor II, i isoform 3 [Homo sapiens]                           |        |      |    |                                     |
| gij14670352 r | 18                 | 47     | 26.00% | 978     | 110280   | 6.7    | general transcription factor II, i isoform 2 [Homo sapiens]                           |        |      |    |                                     |
|               | HsFlag-VPS71_Ti_10 | 3.7876 | 0.2362 | 1749.61 | 1748.13  | 7710.9 | 1                                                                                     | 1286.1 | 64.3 | 1  | R.MVVTFILMSALESMCK.E                |
|               | HsFlag-VPS71_Ti_10 | 2.5629 | 0.1019 | 1300.46 | 1301.442 | 3600.3 | 1                                                                                     | 330.9  | 60   | 1  | K.HPENYDLATLK.W                     |
|               | HsFlag-VPS71_Ti_10 | 2.7316 | 0.304  | 1272.73 | 1273.438 | 4805.7 | 1                                                                                     | 403.1  | 58.3 | 2  | R.SILSPGGSCGPIK.V                   |
|               | HsFLAG-FLJ20729_1  | 3.2442 | 0.2297 | 1729.58 | 1729.93  | 5519.3 | 1                                                                                     | 671.2  | 59.4 | 2  | K.ANELPQPPVPEPANAGK.R               |
|               | HsFLAG-p53-DNA-D   | 4.4885 | 0.3175 | 3471.91 | 3470.993 | 6715   | 1                                                                                     | 869.3  | 28.3 | 1  | K.AKGPVTIPYPLFQSHVEDLYVEGLPEGIPFR.R |
|               | HsFLAG-FLJ20729_1  | 3.7025 | 0.312  | 3271.31 | 3271.74  | 3730.9 | 1                                                                                     | 278    | 25   | 2  | K.GPVTIPYPLFQSHVEDLYVEGLPEGIPFR.R   |
|               | HsFlag-VPS71_Ti_10 | 5.4524 | 0.4714 | 2357.86 | 2358.615 | 6014.4 | 1                                                                                     | 1169.1 | 60.5 | 3  | K.FEAHPNDLYVEGLPENIPFR.S            |
|               | HsFlag-VPS71_Ti_10 | 4.4246 | 0.4166 | 1865.76 | 1866.084 | 5484.1 | 1                                                                                     | 576.9  | 60   | 3  | K.RPELLTHSTTEVTQPR.T                |
|               | HsFLAG-Lin9_Ti_20  | 2.9293 | 0.2704 | 1457.42 | 1459.602 | 8448.1 | 1                                                                                     | 648.3  | 59.1 | 1  | R.TNTPVKEDWNVR.I                    |
|               | HsFlag-VPS71_Ti_10 | 2.8242 | 0.1928 | 1247.6  | 1248.465 | 8245.6 | 1                                                                                     | 921.9  | 68.2 | 1  | K.FAQALGLTEAVK.V                    |
|               | HsFlag-VPS71_Ti_10 | 4.3223 | 0.1941 | 1248.82 | 1248.465 | 4395.6 | 1                                                                                     | 1280.4 | 90.9 | 2  | K.FAQALGLTEAVK.V                    |
|               | HsFLAG-p53-DNA-D   | 5.3215 | 0.4301 | 2895.89 | 2897.3   | 7408.4 | 1                                                                                     | 1222.8 | 47.9 | 12 | K.VPYPVFESNPEFLYVEGLPEGIPFR.S       |
|               | HsFLAG-p53-DNA-D   | 3.6827 | 0.2493 | 1060.81 | 1061.228 | 6462.1 | 2                                                                                     | 1228.2 | 93.8 | 3  | R.SPTWFGIPR.L                       |
|               | HsFlag-VPS71_Ti_10 | 4.5881 | 0.3835 | 1731.84 | 1731.103 | 5604.2 | 1                                                                                     | 1364.1 | 73.3 | 4  | K.KPELVISYLPFGMASK.I                |
|               | HsFLAG-FLJ20729_1  | 3.6901 | 0.2322 | 2890.26 | 2890.264 | 5712.9 | 1                                                                                     | 761.6  | 31.2 | 1  | K.VPFALFESFPEDFYVEGLPEGVPFR.R       |
|               | HsFLAG-p53-DNA-D   | 4.8339 | 0.4677 | 2890.38 | 2890.264 | 5157.6 | 1                                                                                     | 1104.2 | 54.2 | 6  | K.VPFALFESFPEDFYVEGLPEGVPFR.R       |
|               | HsFlag-VPS71_Ti_10 | 3.485  | 0.423  | 1253.36 | 1253.502 | 4927.2 | 1                                                                                     | 1384.5 | 90.9 | 1  | K.FGEAIGMGFPVK.V                    |
|               | HsFLAG-FLJ20729_1  | 3.2775 | 0.2926 | 2088.96 | 2088.436 | 6635.2 | 1                                                                                     | 526    | 44.7 | 1  | K.ITINPGCVVVDGMPPGVSK.A             |
| gij63029937 r | 20                 | 90     | 25.40% | 854     | 98113    | 5.2    | heat shock protein 90kDa alpha (cytosolic), class A member 1 isoform 1 [Homo sapiens] |        |      |    |                                     |
|               | HsFlag-FLJ90652_2  | 3.2895 | 0.2213 | 1309.47 | 1309.462 | 2906.4 | 8                                                                                     | 510.1  | 80   | 1  | K.IRYESLTDPSK.L                     |
|               | HsFLAG-ARP6_Ti_10  | 2.9924 | 0.125  | 1191.24 | 1191.416 | 6634.7 | 1                                                                                     | 1323.8 | 88.9 | 2  | R.ELHINLIPNK.Q                      |
|               | HsFlag-FLJ90652_2  | 4.2722 | 0.1492 | 1242.75 | 1243.446 | 5993.9 | 1                                                                                     | 1316   | 86.4 | 3  | K.ADLINNLGTIAK.S                    |
|               | HsH2AZ-FLAG_293_1  | 2.9898 | 0.2517 | 1312.19 | 1312.332 | 6387.6 | 1                                                                                     | 888.1  | 83.3 | 1  | K.EDQTEYLEER.R                      |
|               | HsFLAG-Lin9_Ti_20  | 4.9763 | 0.3744 | 1781.46 | 1780.076 | 7077.5 | 1                                                                                     | 1376.5 | 75   | 21 | K.HSQFIGYPITLFVEK.E                 |
|               | HsFLAG-ARP6_Ti_10  | 3.5608 | 0.2123 | 1781.59 | 1780.076 | 5416.1 | 5                                                                                     | 1052.8 | 48.2 | 1  | K.HSQFIGYPITLFVEK.E                 |
|               | HsFLAG-TCF3_Ti_10  | 5.0498 | 0.4259 | 1834.83 | 1834.89  | 6532.8 | 1                                                                                     | 1518.8 | 78.6 | 8  | R.NPDDITNEEYGEFYK.S                 |
|               | HsFLAG-ARP6_Ti_10  | 4.5448 | 0.3471 | 1528.58 | 1528.662 | 7822.8 | 1                                                                                     | 1414.3 | 75   | 4  | K.SLTNDWEDHLAVK.H                   |
|               | HsFLAG-ARP6_Ti_10  | 3.5185 | 0.1709 | 1266.15 | 1265.414 | 4931.4 | 3                                                                                     | 765.5  | 77.8 | 5  | R.RAPFDLFENR.K                      |
|               | HsFlag-VPS71_Ti_10 | 3.1934 | 0.2824 | 2416.72 | 2416.76  | 3515.2 | 3                                                                                     | 313.6  | 47.2 | 3  | R.VFIMDNCEELIPEYLNFR.G              |
|               | HsFlag-FLJ90652_2  | 4.3346 | 0.3748 | 1467.49 | 1468.61  | 8763.8 | 1                                                                                     | 2163.6 | 86.4 | 1  | K.CLELFTLAEDK.E                     |
|               | HsFLAG-Lin9_Ti_20  | 2.7156 | 0.2215 | 1296.7  | 1297.414 | 7186.9 | 3                                                                                     | 583.6  | 60   | 1  | K.LGIHEDSQNRK.K                     |
|               | HsFLAG-ARP6_Ti_10  | 2.8757 | 0.3624 | 1224.13 | 1225.387 | 5393.2 | 1                                                                                     | 637.6  | 66.7 | 2  | K.HIYYITGETK.D                      |
|               | HsFLAG-ARP6_Ti_10  | 3.4064 | 0.3272 | 1225.31 | 1225.387 | 3639.2 | 1                                                                                     | 938.5  | 88.9 | 2  | K.HIYYITGETK.D                      |
|               | HsFlag-FLJ90652_2  | 4.9389 | 0.3888 | 2577.51 | 2578.949 | 7286.2 | 1                                                                                     | 954.2  | 47.5 | 6  | K.HGLEVIYMIPIDEYCVQQLK.E            |
|               | HsFLAG-FLJ20729_1  | 4.614  | 0.1161 | 2578.85 | 2578.949 | 8549.9 | 1                                                                                     | 1823.8 | 41.2 | 4  | K.HGLEVIYMIPIDEYCVQQLK.E            |
|               | HsH2AZ-FLAG_293_1  | 2.5147 | 0.1093 | 1418.23 | 1417.466 | 2950.6 | 7                                                                                     | 336.9  | 68.2 | 1  | K.EGLELPEDEEEK.K                    |
|               | HsFlag-VPS71_Ti_10 | 3.4799 | 0.4129 | 2446.2  | 2447.697 | 7907.1 | 1                                                                                     | 527.2  | 37.5 | 2  | R.LVTSPPCCIVTSTYGWTANMER.I          |

|               |                    |        |        |         |          |                                                                 |   |        |      |    |                              |
|---------------|--------------------|--------|--------|---------|----------|-----------------------------------------------------------------|---|--------|------|----|------------------------------|
|               | HsFlag-FLJ90652_29 | 5.0419 | 0.3938 | 1787.05 | 1788.013 | 7875.4                                                          | 1 | 2211.3 | 85.7 | 17 | K.HLEINPDHSIETLR.Q           |
|               | HsFLAG-FLJ20729_   | 4.4426 | 0.3544 | 1788.86 | 1788.013 | 10014.4                                                         | 1 | 1501.1 | 46.4 | 5  | K.HLEINPDHSIETLR.Q           |
| gi 4505343 re | 14                 | 51     | 25.40% | 790     | 91839    | 6.4 nuclear cap binding protein subunit 1, 80kDa [Homo sapiens] |   |        |      |    |                              |
| *             | HsFLAG-ARP6_Ti_1   | 5.1627 | 0.4349 | 1962.16 | 1963.028 | 6829.9                                                          | 1 | 1645.9 | 68.8 | 2  | K.TSDANETEDHLESICK.V         |
| *             | HsFLAG-ARP6_Ti_1   | 5.6435 | 0.3706 | 2551.14 | 2551.776 | 8651.6                                                          | 1 | 1628.7 | 54.3 | 11 | K.SACSLESNLEGLAGVLEADLPNYK.S |
| *             | HsFLAG-ARP6_Ti_1   | 3.7026 | 0.2162 | 1548.44 | 1548.866 | 7789.7                                                          | 1 | 1335.2 | 73.1 | 2  | K.LTIYTTLVLGNAR.N            |
| *             | HsFLAG-ARP6_Ti_1   | 4.6851 | 0.4862 | 1647.37 | 1647.846 | 6278.2                                                          | 1 | 1397.8 | 76.9 | 2  | R.NYNFGGEFVEAMIR.Q           |
| *             | HsFlag-NUFIP_Ti_1  | 4.4732 | 0.4519 | 2366.69 | 2367.567 | 4935.2                                                          | 1 | 839.2  | 55   | 3  | R.MFDYTDDEPEGPVMPGSHSVER.F   |
| *             | HsFLAG-ARP6_Ti_1   | 4.3173 | 0.2777 | 1515.76 | 1515.759 | 8396.8                                                          | 1 | 2168.6 | 90.9 | 6  | R.FVIEENLHCIK.S              |
| *             | HsFlag-NUFIP_Ti_1  | 4.1506 | 0.241  | 2493.68 | 2491.862 | 4549.7                                                          | 1 | 482.1  | 47.6 | 3  | R.ILDIVPPTFSALCPANPTCIYK.Y   |
| *             | HsFLAG-ARP6_Ti_1   | 3.4144 | 0.3195 | 1581.98 | 1582.927 | 9997.6                                                          | 1 | 1154.5 | 65.4 | 1  | K.IEVFVQTLHLAAK.S            |
| *             | HsFLAG-ARP6_Ti_1   | 2.4753 | 0.1591 | 1181.55 | 1182.321 | 6419.8                                                          | 1 | 555.7  | 60   | 1  | K.SFSHSFSALAK.F              |
| *             | HsFLAG-ARP6_Ti_1   | 3.1446 | 0.1529 | 1184.63 | 1182.321 | 6478                                                            | 1 | 991.6  | 80   | 2  | K.SFSHSFSALAK.F              |
| *             | HsFLAG-ARP6_Ti_1   | 5.0606 | 0.4885 | 2267.63 | 2268.497 | 6600.5                                                          | 1 | 1178.8 | 60.5 | 8  | R.TQIVDCAAVANWIFSSSELSR.D    |
| *             | HsFlag-NUFIP_Ti_1  | 4.2144 | 0.3773 | 1514.72 | 1514.811 | 8265.8                                                          | 1 | 1606.4 | 81.8 | 3  | R.LFVWEILHSTIR.K             |
| *             | HsFLAG-ARP6_Ti_1   | 3.8345 | 0.2693 | 1149.51 | 1150.409 | 7672.4                                                          | 1 | 1779.6 | 93.8 | 4  | K.NLFLVIFQR.F                |
| *             | HsFLAG-ARP6_Ti_1   | 3.9549 | 0.3622 | 1372.32 | 1372.712 | 6916.5                                                          | 1 | 1531.6 | 85   | 3  | R.FIMILTEHLVR.C              |
| gi 4504425 re | 5                  | 9      | 25.10% | 215     | 24894    | 5.7 high-mobility group box 1 [Homo sapiens]                    |   |        |      |    |                              |
| *             | HsFlag-VPS71_Ti_1  | 3.4373 | 0.1664 | 1465.82 | 1465.562 | 4946.6                                                          | 2 | 794    | 75   | 2  | K.HPDASVNFSEFSK.K            |
|               | HsFLAG-p53-DNA-D   | 2.6478 | 0.1858 | 1134.37 | 1134.318 | 3599.5                                                          | 1 | 707    | 77.8 | 1  | K.TYIPPKGETK.K               |
| *             | HsFLAG-Lin9_Ti_20  | 4.7417 | 0.2844 | 2004.43 | 2003.277 | 8505.1                                                          | 1 | 1595.5 | 43.3 | 2  | K.RPPSAFFLFCSEYRPK.I         |
|               | HsFlag-NUFIP_Ti_20 | 4.0757 | 0.3812 | 1521.49 | 1521.757 | 6102.4                                                          | 1 | 764.5  | 60.7 | 3  | K.IKGEHPGLSIGDVAK.K          |
|               | HsFLAG-Lin9_Ti_20  | 3.2555 | 0.3859 | 1279.61 | 1280.423 | 4393.9                                                          | 1 | 459.4  | 62.5 | 1  | K.GEHPGLSIGDVAK.K            |
| gi 20149594 r | 16                 | 48     | 24.90% | 724     | 83264    | 5 heat shock 90kDa protein 1, beta [Homo sapiens]               |   |        |      |    |                              |
|               | HsFlag-VPS71_Ti_1  | 2.6074 | 0.2479 | 1275.61 | 1276.386 | 3329.6                                                          | 2 | 220.6  | 59.1 | 1  | R.ELISNASDALDK.I             |
|               | HsFlag-FLJ90652_29 | 3.2895 | 0.2213 | 1309.47 | 1309.462 | 2906.4                                                          | 8 | 510.1  | 80   | 1  | K.IRYESLTDPSK.L              |
|               | HsFLAG-ARP6_Ti_1   | 4.3879 | 0.3501 | 1809.7  | 1810.014 | 3503.6                                                          | 1 | 992.5  | 80   | 6  | K.IRYESLTDPSKLDSGK.E         |
|               | HsFlag-FLJ90652_29 | 4.2722 | 0.1492 | 1242.75 | 1243.446 | 5993.9                                                          | 1 | 1316   | 86.4 | 3  | K.ADLINNLGTIAK.S             |
|               | HsH2AZ-FLAG_293_   | 2.9898 | 0.2517 | 1312.19 | 1312.332 | 6387.6                                                          | 1 | 888.1  | 83.3 | 1  | K.EDQTEYLEER.R               |
| *             | HsFlag-FLJ90652_29 | 3.6847 | 0.2775 | 2504.41 | 2502.699 | 7070.8                                                          | 1 | 719.1  | 47.4 | 2  | K.PIWTRNPDDITQEEYGEFYK.S     |
| *             | HsFlag-VPS71_Ti_1  | 5.7105 | 0.4133 | 1849.73 | 1848.917 | 6604.1                                                          | 1 | 1652.6 | 78.6 | 10 | R.NPDDITQEEYGEFYK.S          |
|               | HsFLAG-ARP6_Ti_1   | 4.5448 | 0.3471 | 1528.58 | 1528.662 | 7822.8                                                          | 1 | 1414.3 | 75   | 4  | K.SLTNDWEDHLAVK.H            |
| *             | HsFLAG-FLJ20729_   | 2.8451 | 0.3316 | 2375.49 | 2375.708 | 3737.9                                                          | 2 | 324.4  | 47.2 | 1  | R.VFIMDSCDELIPEYLNFR.G       |
| *             | HsFlag-VPS71_Ti_1  | 2.6434 | 0.2932 | 1141.58 | 1142.214 | 4302.1                                                          | 1 | 391.4  | 72.2 | 2  | K.LGIHEDSTNR.R               |
| *             | HsFlag-NUFIP_Ti_20 | 2.6149 | 0.2105 | 1143.58 | 1142.214 | 6406.7                                                          | 2 | 673.5  | 72.2 | 1  | K.LGIHEDSTNR.R               |
|               | HsFLAG-TCF3_Ti_1   | 4.5031 | 0.29   | 2449.56 | 2449.744 | 4232.6                                                          | 1 | 523.4  | 52.6 | 3  | R.GFEVVYMTPEIDEYCVQQLK.E     |
|               | HsH2AZ-FLAG_293_   | 2.5147 | 0.1093 | 1418.23 | 1417.466 | 2950.6                                                          | 7 | 336.9  | 68.2 | 1  | K.EGLELPEDEEEK.K             |
| *             | HsFLAG-ARP6_Ti_1   | 4.4601 | 0.4332 | 2433.2  | 2433.671 | 7710.5                                                          | 1 | 830.3  | 45   | 3  | R.LVSSPCCIVTSTYGTANMER.I     |
| *             | HsFLAG-FLJ20729_   | 4.4914 | 0.2935 | 1784.78 | 1784.025 | 5877.5                                                          | 1 | 1724.9 | 85.7 | 8  | K.HLEINPDHPIVETLR.Q          |
| *             | HsFlag-VPS71_Ti_1  | 4.6052 | 0.2568 | 1785.23 | 1784.025 | 5851.9                                                          | 1 | 1353.1 | 51.8 | 1  | K.HLEINPDHPIVETLR.Q          |
| gi 20336746 r | 5                  | 18     | 24.90% | 369     | 39183    | 9.8 H2A histone family, member Y isoform 1 [Homo sapiens]       |   |        |      |    |                              |
| gi 4758496 re | 5                  | 18     | 24.80% | 371     | 39489    | 9.8 H2A histone family, member Y isoform 2 [Homo sapiens]       |   |        |      |    |                              |
| gi 20336748 r | 5                  | 18     | 24.70% | 372     | 39591    | 9.8 H2A histone family, member Y isoform 3 [Homo sapiens]       |   |        |      |    |                              |



|                |                   |        |        |         |          |        |                                                                                                 |        |      |                               |
|----------------|-------------------|--------|--------|---------|----------|--------|-------------------------------------------------------------------------------------------------|--------|------|-------------------------------|
|                | HsFLAG-p53-DNA-D  | 5.4698 | 0.4284 | 1934.86 | 1934.243 | 7343.5 | 1                                                                                               | 2142.2 | 78.1 | 8 R.HILLAVANDEELNQLLK.G       |
|                | HsFLAG-ARP6_Ti_1  | 4.912  | 0.4643 | 1986.65 | 1987.35  | 4303.3 | 1                                                                                               | 780.4  | 57.9 | 4 K.GVTIASGGVLPNIHPELLAK.K    |
|                | HsFLAG-ARP6_Ti_1  | 2.8638 | 0.1464 | 1335.7  | 1335.63  | 7926.2 | 1                                                                                               | 915.2  | 58.3 | 1 K.GKLEAITPPPAK.K            |
|                | HsFLAG-p53-DNA-D  | 2.8306 | 0.1701 | 2127.38 | 2128.254 | 7716.2 | 1                                                                                               | 544.7  | 40.5 | 1 K.AASADSTTEGTPADGFTVLSTK.S  |
|                | HsFLAG-p53-DNA-D  | 5.0424 | 0.3886 | 1816.47 | 1817.055 | 9113.9 | 1                                                                                               | 1822.2 | 60.5 | 4 K.NGPLEVAGAAVSAGHGLPAK.F    |
| gij 38201710 r | 18                | 100    | 24.80% | 729     | 80273    | 8.3    | DEAD box polypeptide 17 isoform p82 [Homo sapiens]                                              |        |      |                               |
| *              | HsFLAG-FLJ20729_  | 3.4788 | 0.1701 | 1520.29 | 1520.769 | 9765.1 | 1                                                                                               | 1044.4 | 68.2 | 2 K.KWDLSELPKFEK.N            |
| *              | HsFLAG-ARP6_Ti_1  | 3.4538 | 0.3425 | 1361    | 1361.5   | 7724.5 | 1                                                                                               | 1335.4 | 80   | 12 K.NFYVEHPEVAR.L            |
| *              | HsFLAG-Lin9_Ti_20 | 2.5197 | 0.2557 | 1361.67 | 1361.5   | 4350.6 | 1                                                                                               | 354.5  | 65   | 1 K.NFYVEHPEVAR.L             |
|                | HsFLAG-FLJ20729_  | 3.68   | 0.1617 | 1369.4  | 1369.57  | 8205   | 1                                                                                               | 1337   | 70.8 | 10 R.GDGPICLVLPTR.E           |
| *              | HsFLAG-Lin9_Ti_20 | 4.9557 | 0.4056 | 1692.39 | 1692.823 | 7385.6 | 1                                                                                               | 2063.3 | 82.1 | 9 R.ELAQQVQQVADDYDGK.C        |
|                | HsFLAG-Lin9_Ti_20 | 3.4493 | 0.2586 | 1173.24 | 1173.321 | 5889.8 | 4                                                                                               | 1103.1 | 80   | 1 R.GVEICIATPGR.L             |
|                | HsFlag-VPS71_Ti_1 | 3.9446 | 0.3609 | 1338.59 | 1337.595 | 6421.6 | 1                                                                                               | 1768.7 | 90   | 2 R.MLDMGFEPQIR.K             |
|                | HsFlag-VPS71_Ti_1 | 3.4534 | 0.2605 | 1350.45 | 1349.59  | 5704.3 | 1                                                                                               | 749    | 80   | 3 R.QTLMWSATWPK.E             |
| *              | HsFLAG-p53-DNA-D  | 3.2248 | 0.2041 | 1677.07 | 1676.829 | 7080   | 1                                                                                               | 934.6  | 66.7 | 3 K.SQPERDWVLNEFR.S           |
|                | HsFlag-DPCD_Ti_20 | 3.9001 | 0.3219 | 1227.45 | 1227.447 | 6409.8 | 1                                                                                               | 1340.3 | 81.8 | 24 K.APILIATDVASR.G           |
|                | HsFLAG-Lin9_Ti_20 | 2.3447 | 0.1664 | 1227.48 | 1227.447 | 4392.5 | 1                                                                                               | 224.8  | 54.5 | 1 K.APILIATDVASR.G            |
|                | HsFlag-VPS71_Ti_1 | 3.8816 | 0.4273 | 2082.57 | 2083.39  | 7258   | 1                                                                                               | 890.5  | 52.6 | 1 K.APILIATDVASRGLDVEDVK.F    |
|                | HsH2AZ-FLAG_293_  | 2.0551 | 0.157  | 874.29  | 874.966  | 5857.2 | 2                                                                                               | 691.2  | 78.6 | 1 R.GLDVEDVK.F                |
| *              | HsFLAG-p53-DNA-D  | 4.7605 | 0.4117 | 2118.84 | 2119.254 | 5229.8 | 1                                                                                               | 847.9  | 62.5 | 8 K.FVINYDYPNSSEYVHR.I        |
| *              | HsFlag-DPCD_Ti_20 | 4.0002 | 0.3646 | 1417.24 | 1417.604 | 7391   | 1                                                                                               | 1379.4 | 79.2 | 9 K.GTAYTFFTPGNLQ.K           |
| *              | HsFLAG-FLJ20729_  | 3.5571 | 0.1539 | 1325.86 | 1326.492 | 6999.9 | 1                                                                                               | 1914.1 | 86.4 | 5 K.VLEEANQAINPK.L            |
| *              | HsFLAG-FLJ20729_  | 2.8888 | 0.1615 | 1012.12 | 1012.215 | 7386.2 | 3                                                                                               | 1230.6 | 92.9 | 2 K.LMQLVDHR.G                |
|                | HsFLAG-FLJ20309_  | 4.4208 | 0.3835 | 1456.26 | 1456.512 | 9181.5 | 1                                                                                               | 1482   | 69.2 | 6 R.SSQSSSQFSGIGR.S           |
| gij 4757810 re | 11                | 32     | 24.80% | 553     | 59751    | 9.1    | ATP synthase, H+ transporting, mitochondrial F1 complex, alpha subunit precursor [Homo sapiens] |        |      |                               |
| gij 50345984 r | 11                | 32     | 24.80% | 553     | 59751    | 9.1    | ATP synthase, H+ transporting, mitochondrial F1 complex, alpha subunit precursor [Homo sapiens] |        |      |                               |
| gij 50345982 r | 11                | 32     | 27.20% | 503     | 54494    | 8.2    | ATP synthase, H+ transporting, mitochondrial F1 complex, alpha subunit isoform b [Homo sapiens] |        |      |                               |
|                | HsFLAG-ARP6_Ti_1  | 2.6411 | 0.2203 | 2103.44 | 2105.37  | 5052   | 2                                                                                               | 506.6  | 47.4 | 2 K.GMSLNLEPDNVGVVVFNDK.L     |
|                | HsFLAG-ARP6_Ti_1  | 4.9982 | 0.31   | 1781.71 | 1782.05  | 4478.3 | 1                                                                                               | 1677.7 | 81.2 | 3 K.RTGAIVDVPVGEELLGR.V       |
|                | HsFLAG-ARP6_Ti_1  | 4.2319 | 0.2911 | 1782.17 | 1782.05  | 5337.5 | 1                                                                                               | 1480.4 | 50   | 2 K.RTGAIVDVPVGEELLGR.V       |
|                | HsFLAG-ARP6_Ti_1  | 3.5468 | 0.3156 | 1288.36 | 1288.486 | 6033   | 1                                                                                               | 1580.3 | 90   | 2 K.HALIYDDLK.Q               |
|                | HsFLAG-ARP6_Ti_1  | 3.5257 | 0.4022 | 1555.62 | 1554.702 | 6214.3 | 1                                                                                               | 934.8  | 70.8 | 3 R.EAYPGDVLYLHSLR.L          |
|                | HsFLAG-TCF3_Ti_1  | 5.8961 | 0.4139 | 2338.78 | 2339.567 | 7053.7 | 1                                                                                               | 1283.8 | 38.1 | 3 R.EVAFAAQFGSDLDAATQQLLSR.G  |
|                | HsFLAG-ARP6_Ti_1  | 6.6814 | 0.4903 | 2339.22 | 2339.567 | 8206.4 | 1                                                                                               | 2365.4 | 66.7 | 5 R.EVAFAAQFGSDLDAATQQLLSR.G  |
|                | HsFLAG-ARP6_Ti_1  | 3.7713 | 0.3034 | 2310.1  | 2310.63  | 7670.1 | 1                                                                                               | 729.3  | 45   | 1 K.QGQYSPMAIEEQVAVIYAGVR.G   |
|                | HsFLAG-ARP6_Ti_1  | 6.2558 | 0.4607 | 2367.79 | 2368.701 | 8165.5 | 1                                                                                               | 2251.3 | 43.8 | 5 K.FENAFLSHVVSQHQALLGTIR.A   |
|                | HsFLAG-ARP6_Ti_1  | 6.0386 | 0.4513 | 2368.41 | 2368.701 | 7144.6 | 1                                                                                               | 1878   | 65   | 4 K.FENAFLSHVVSQHQALLGTIR.A   |
|                | HsFLAG-ARP6_Ti_1  | 3.2766 | 0.3301 | 1311.13 | 1311.477 | 8047.4 | 1                                                                                               | 1093.1 | 72.7 | 2 K.EIVTNFLAGFEA.-            |
| gij 5453549 re | 4                 | 11     | 24.70% | 271     | 30540    | 6.3    | thioredoxin peroxidase [Homo sapiens]                                                           |        |      |                               |
| *              | HsFLAG-ARP6_Ti_1  | 3.7768 | 0.2959 | 1293.26 | 1293.465 | 8778.8 | 1                                                                                               | 1901.9 | 86.4 | 2 R.VSVADHSLHLSK.A            |
| *              | HsFLAG-ARP6_Ti_1  | 3.1182 | 0.4028 | 2108.36 | 2109.386 | 7762.9 | 1                                                                                               | 913.9  | 55.6 | 1 K.ISKPAPYWEGTAVIDGEFK.E     |
| *              | HsFlag-NUFIP_Ti_1 | 3.8359 | 0.3869 | 1464.42 | 1465.733 | 8256.5 | 1                                                                                               | 1263.6 | 70.8 | 7 R.IPLLSDLTHQISK.D           |
| *              | HsFLAG-FLJ20729_  | 3.538  | 0.2208 | 2403.52 | 2404.651 | 7352.3 | 1                                                                                               | 627.4  | 28.4 | 1 K.HGEVCPAGWKPGSETIIPDPAGK.L |

|                     |        |        |         |          |         |                                                                    |        |      |   |                                 |
|---------------------|--------|--------|---------|----------|---------|--------------------------------------------------------------------|--------|------|---|---------------------------------|
| gi 4506773 re       | 2      | 7      | 24.60%  | 114      | 13242   | 6.1 S100 calcium-binding protein A9 [Homo sapiens]                 |        |      |   |                                 |
| * HsFLAG-p53-DNA-D  | 4.5125 | 0.3453 | 1807.66 | 1808.044 | 8165.6  | 1                                                                  | 1249.7 | 67.9 | 4 | R.NIETIINTFHQYSVK.L             |
| * HsFLAG-RPB5MP_2   | 3.4314 | 0.2246 | 1457.18 | 1456.598 | 3886.2  | 1                                                                  | 576.6  | 70.8 | 3 | K.LGHPDTLNQGEFK.E               |
| gi 30474871 r       | 2      | 3      | 24.50%  | 143      | 16073   | 6.3 serine palmitoyltransferase subunit 1 isoform b [Homo sapiens] |        |      |   |                                 |
| gi 5454084 re       | 2      | 3      | 7.40%   | 473      | 52744   | 6 serine palmitoyltransferase subunit 1 isoform a [Homo sapiens]   |        |      |   |                                 |
| HsFLAG-ARP6_Ti_1    | 3.1043 | 0.4796 | 1845.6  | 1847.04  | 9328.8  | 1                                                                  | 675.3  | 50   | 1 | K.DHPALNYNIVSGPPSHK.T           |
| HsFLAG-ARP6_Ti_1    | 2.8429 | 0.1662 | 2128.21 | 2128.358 | 10339.6 | 2                                                                  | 570.3  | 47.1 | 2 | K.ECINFASFNGLLDNPR.V            |
| gi 5031973 re       | 6      | 15     | 24.30%  | 440      | 48121   | 5.1 protein disulfide isomerase-associated 6 [Homo sapiens]        |        |      |   |                                 |
| * HsFlag-VPS71_Ti_1 | 4.3195 | 0.2085 | 1387.68 | 1387.576 | 6235.9  | 1                                                                  | 1790.2 | 80.8 | 5 | R.TGEAIVDAALSALR.Q              |
| * HsFLAG-ARP6_Ti_1  | 3.6439 | 0.1054 | 1397.43 | 1397.478 | 7227.5  | 1                                                                  | 1734.6 | 86.4 | 1 | K.DVIELTDDSFDK.N                |
| * HsFlag-VPS71_Ti_1 | 4.9272 | 0.4328 | 1528.64 | 1528.749 | 8299.9  | 1                                                                  | 2391.5 | 82.1 | 2 | K.LAAVDATVNQVLASR.Y             |
| * HsFlag-VPS71_Ti_1 | 3.8375 | 0.2366 | 2638.42 | 2638.975 | 2959.3  | 1                                                                  | 515.7  | 50   | 2 | R.ALDLFSNAPPPELLEIINEDIAK.R     |
| * HsFLAG-p53-DNA-D  | 3.178  | 0.2812 | 1616.69 | 1616.814 | 6811    | 1                                                                  | 817.5  | 59.4 | 1 | R.GSTAPVGGGAFPTIVER.E           |
| * HsFLAG-ARP6_Ti_1  | 4.0736 | 0.4269 | 2759.13 | 2759.889 | 7254.3  | 1                                                                  | 1055.1 | 45.8 | 4 | R.DGELPVEDDIDLSDELDDLGKDEL.-    |
| gi 4506631 re       | 2      | 7      | 24.30%  | 115      | 12784   | 9.6 ribosomal protein L30 [Homo sapiens]                           |        |      |   |                                 |
| * HsFLAG-ARP6_Ti_1  | 4.0235 | 0.3074 | 1354.49 | 1354.602 | 7373.3  | 1                                                                  | 1491.9 | 81.8 | 3 | K.LVILANNCPALR.K                |
| * HsFLAG-TCF3_Ti_1  | 4.4311 | 0.2456 | 1759.68 | 1758.976 | 6521.6  | 1                                                                  | 1791.9 | 76.7 | 4 | R.VCTLAIDPGDSDIIR.S             |
| gi 29826282 r       | 8      | 13     | 24.20%  | 546      | 59272   | 4.4 protein phosphatase 1G [Homo sapiens]                          |        |      |   |                                 |
| gi 4505999 re       | 8      | 13     | 24.20%  | 546      | 59272   | 4.4 protein phosphatase 1G [Homo sapiens]                          |        |      |   |                                 |
| HsH2AZ-FLAG_293_    | 3.0105 | 0.1141 | 1234.48 | 1233.45  | 4403.3  | 6                                                                  | 673.7  | 77.8 | 2 | K.YLPDIKDQK.A                   |
| HsH2AZ-FLAG_293_    | 4.1723 | 0.2413 | 1277.19 | 1277.46  | 5337.1  | 1                                                                  | 1319.7 | 86.4 | 2 | K.ALEDAFLAIDAK.L                |
| HsH2AZ-FLAG_293_    | 4.8242 | 0.3792 | 1801.38 | 1801.905 | 6349.6  | 1                                                                  | 913.9  | 63.3 | 1 | K.ELAQIAGRPTEDDEK.E             |
| HsH2AZ-FLAG_293_    | 5.2315 | 0.4339 | 2346.67 | 2347.328 | 5629.6  | 1                                                                  | 1088.2 | 54.2 | 2 | K.SGGGTGEEPQSGLNGEAGPEDSTR.E    |
| HsH2AZ-FLAG_293_    | 3.1665 | 0.2769 | 1219.23 | 1219.253 | 6044.8  | 1                                                                  | 1387.7 | 90   | 2 | K.AYTGFSNSER.G                  |
| HsH2AZ-FLAG_293_    | 4.2299 | 0.3368 | 2546.64 | 2547.615 | 4846    | 1                                                                  | 631.9  | 46.2 | 2 | R.GTEAGQVGEPGIPTGEAGPSCSSASDK.L |
| HsH2AZ-FLAG_293_    | 3.5016 | 0.2696 | 1174.07 | 1174.253 | 5715.1  | 1                                                                  | 1343.8 | 80   | 1 | R.NTAELQPESGK.R                 |
| HsH2AZ-FLAG_293_    | 5.4073 | 0.3757 | 2205.55 | 2206.328 | 7939    | 1                                                                  | 1365.9 | 57.9 | 1 | K.RKLEEVLSTEGAEENGNSDK.K        |
| gi 8923059 re       | 10     | 22     | 24.10%  | 410      | 46717   | 7.1 mbt domain containing 1 [Homo sapiens]                         |        |      |   |                                 |
| * HsMRGBP-FLAG_Ti_  | 3.3524 | 0.3333 | 1460.66 | 1460.59  | 3685.4  | 3                                                                  | 484.4  | 70.8 | 1 | R.VEVPNTDCSLPTK.V               |
| * HsMRGBP-FLAG_Ti_  | 2.7827 | 0.1135 | 1033.97 | 1033.302 | 3921.2  | 1                                                                  | 827    | 87.5 | 1 | K.VFWIAGIVK.L                   |
| * HsH2AZ-FLAG_293_  | 3.1825 | 0.2448 | 992     | 991.178  | 4053    | 1                                                                  | 918.2  | 93.8 | 3 | K.LAGYNALLR.Y                   |
| * HsMRGBP-FLAG_Ti_  | 2.9058 | 0.299  | 1762.66 | 1761.03  | 4226.6  | 7                                                                  | 274.6  | 46.2 | 1 | K.VSESMQYPFKPCMR.V              |
| * HsMRGBP-FLAG_Ti_  | 1.9212 | 0.3668 | 1085.66 | 1086.277 | 5118.8  | 1                                                                  | 469.4  | 70   | 1 | R.VAVVESVIGGR.L                 |
| * HsMRGBP-FLAG_Ti_  | 4.2509 | 0.3411 | 1086.76 | 1086.277 | 8310.7  | 1                                                                  | 2296.3 | 95   | 2 | R.VAVVESVIGGR.L                 |
| * HsFLAG-TIP49b_Ti_ | 4.3609 | 0.4007 | 1739.31 | 1738.943 | 7148    | 1                                                                  | 1310.7 | 71.4 | 5 | K.KQDGHFDTPPHLFAK.V             |
| * HsMRGBP-FLAG_Ti_  | 2.4745 | 0.3116 | 1224.47 | 1225.3   | 3467.2  | 9                                                                  | 179.5  | 55.6 | 3 | K.EVDQSGEWFK.E                  |
| * HsMRGBP-FLAG_Ti_  | 2.7747 | 0.1457 | 1225.55 | 1225.3   | 6303.6  | 2                                                                  | 663.2  | 72.2 | 2 | K.EVDQSGEWFK.E                  |
| * HsMRGBP-FLAG_Ti_  | 5.3918 | 0.4586 | 2001    | 2000.309 | 6180.8  | 1                                                                  | 1776.7 | 76.5 | 3 | K.LEAIDPLNLSTICVATIR.K          |
| gi 4758158 re       | 5      | 11     | 24.10%  | 361      | 41487   | 6.6 septin 2 [Homo sapiens]                                        |        |      |   |                                 |
| gi 56549640 r       | 5      | 11     | 24.10%  | 361      | 41487   | 6.6 septin 2 [Homo sapiens]                                        |        |      |   |                                 |
| gi 56549638 r       | 5      | 11     | 24.10%  | 361      | 41487   | 6.6 septin 2 [Homo sapiens]                                        |        |      |   |                                 |
| gi 56549636 r       | 5      | 11     | 24.10%  | 361      | 41487   | 6.6 septin 2 [Homo sapiens]                                        |        |      |   |                                 |
| HsFLAG-p53-DNA-D    | 4.6171 | 0.3824 | 1883.56 | 1883.152 | 8237.9  | 1                                                                  | 1360.2 | 66.7 | 2 | K.STLINSFLTDLYPER.V             |

|             |                    |        |        |         |          |         |   |        |      |                                                                                                          |
|-------------|--------------------|--------|--------|---------|----------|---------|---|--------|------|----------------------------------------------------------------------------------------------------------|
|             | HsFLAG-p53-DNA-D   | 3.6835 | 0.3976 | 1513.59 | 1514.675 | 7347.9  | 1 | 1353.4 | 77.3 | 1 K.TIISYIDEQFER.Y                                                                                       |
|             | HsFLAG-p53-DNA-D   | 3.5983 | 0.2949 | 1760.48 | 1761.028 | 6089.6  | 1 | 575.3  | 50   | 3 K.ASIPFSVVGSNQLIEAK.G                                                                                  |
|             | HsFlag-VPS71_Ti_1  | 3.851  | 0.1818 | 2286.61 | 2286.549 | 5373.7  | 1 | 821.7  | 58.3 | 2 R.LYPWGVVEVENPEHNDFLK.L                                                                                |
|             | HsFLAG-p53-DNA-D   | 6.0023 | 0.3672 | 2864.98 | 2864.22  | 9449.3  | 1 | 1558.6 | 37.5 | 3 R.TMLITHMQDLQEVTDQLHYENFR.S                                                                            |
| gj 46430642 |                    | 16     | 29     | 24.00%  | 1028     | 117949  |   |        |      | 9.4 myosin IC [Homo sapiens]                                                                             |
| *           | HsFLAG-Lin9_Ti_20  | 4.1087 | 0.4112 | 2612.72 | 2612.942 | 10038.2 | 1 | 1436   | 52.3 | 1 R.VGVQDFVLLNFTSEAAFIENLR.R                                                                             |
| *           | HsFLAG-ARP6_Ti_1   | 3.5309 | 0.3214 | 2211.89 | 2211.566 | 7702.1  | 1 | 666.2  | 47.2 | 1 R.ENLIYTYIGPVLVSVNPNYR.D                                                                               |
|             | HsFLAG-ARP6_Ti_1   | 3.4338 | 0.2414 | 1600.58 | 1601.843 | 6182.3  | 1 | 627.1  | 60.7 | 1 R.LLQSNPVLEAFGNAK.T                                                                                    |
| *           | HsFLAG-ARP6_Ti_1   | 4.2079 | 0.3696 | 1554.69 | 1554.83  | 5576.7  | 1 | 1133.7 | 75   | 4 K.GAPVGGHILSYLLEK.S                                                                                    |
| *           | HsFLAG-ARP6_Ti_1   | 3.1522 | 0.2482 | 1226.27 | 1225.43  | 8031.7  | 1 | 884.8  | 77.8 | 2 R.NPQSYLYLVK.G                                                                                         |
| *           | HsFLAG-ARP6_Ti_1   | 3.6297 | 0.363  | 1876.2  | 1875.089 | 5228.1  | 1 | 638.5  | 56.2 | 1 K.GEELLSPLNLEQAAYAR.D                                                                                  |
| *           | HsFLAG-ARP6_Ti_1   | 3.5927 | 0.4341 | 2012.91 | 2014.285 | 8478.5  | 1 | 954    | 55.9 | 3 R.LLHYAGEVTYSVTGFLDK.N                                                                                 |
| *           | HsFLAG-Lin9_Ti_20  | 3.3574 | 0.1687 | 1305.23 | 1305.52  | 8635.5  | 1 | 1090.9 | 75   | 1 K.KRPETVATQFK.M                                                                                        |
| *           | HsFLAG-ARP6_Ti_1   | 5.0649 | 0.2948 | 1502.21 | 1502.853 | 8967.6  | 1 | 2348.2 | 83.3 | 2 K.MSLLQLVEILQSK.E                                                                                      |
| *           | HsFLAG-Lin9_Ti_20  | 4.0679 | 0.3409 | 1504.66 | 1505.639 | 10023.2 | 1 | 1415.2 | 77.3 | 1 R.CPENAFFLDHVR.T                                                                                       |
| *           | HsFLAG-ARP6_Ti_1   | 3.6864 | 0.4525 | 1664.66 | 1664.902 | 3932.4  | 1 | 708.9  | 67.9 | 2 R.NVLDTSWPTPPPALR.E                                                                                    |
| *           | HsScrap_Ti_102.271 | 2.9671 | 0.2518 | 1913.12 | 1912.28  | 4823.6  | 2 | 556    | 55.9 | 2 R.VLQALGSEPIQYAVPVVK.Y                                                                                 |
| *           | HsFLAG-ARP6_Ti_1   | 3.114  | 0.2632 | 1723.64 | 1724.051 | 4295.8  | 1 | 731.4  | 66.7 | 2 R.QLLTPNAVVIDAK.V                                                                                      |
| *           | HsFLAG-Lin9_Ti_20  | 2.9557 | 0.2384 | 1756.96 | 1754.978 | 9035    | 1 | 825.7  | 53.3 | 2 K.GDVVLQSDHVIETLTK.T                                                                                   |
| *           | HsFLAG-ARP6_Ti_1   | 4.3313 | 0.437  | 1901.9  | 1903.105 | 7859.8  | 1 | 1199.6 | 58.3 | 3 R.VNSININQGSITFAGGPGR.D                                                                                |
| *           | HsFLAG-ARP6_Ti_1   | 3.2562 | 0.3719 | 1034.24 | 1034.206 | 6830.3  | 1 | 1224.9 | 83.3 | 1 K.NGHLAVVAPR.L                                                                                         |
| gj 5174409  |                    | 4      | 7      | 23.80%  | 341      | 37646   |   |        |      | 4.6 CD2 antigen (cytoplasmic tail) binding protein 2 [Homo sapiens]                                      |
| *           | HsFlag-ZnF-HIT2_Ti | 4.3882 | 0.4143 | 2121.53 | 2120.274 | 6116.7  | 1 | 1126.2 | 61.1 | 1 K.VTFQGVGDEEDEDEIIVPK.K                                                                                |
| *           | HsARP6-FLAG_Ti_1   | 3.3296 | 0.2587 | 1392.23 | 1391.523 | 6363.1  | 1 | 1094   | 80   | 1 R.DSWLDNIDWVK.I                                                                                        |
| *           | HsFlag-ZnF-HIT2_Ti | 5.0069 | 0.3406 | 4161.55 | 4162.537 | 9183.7  | 1 | 1111.7 | 25.7 | 3 K.GLGCQTLGPHNPTPPPSLDMFAEELAELEELETPTPTQR.G                                                            |
| *           | HsFlag-ZnF-HIT2_Ti | 3.3079 | 0.2828 | 1450.74 | 1451.622 | 2675.5  | 1 | 533.2  | 79.2 | 2 R.KLDPPGGQFYNSK.R                                                                                      |
| gj 55956919 |                    | 8      | 44     | 23.80%  | 332      | 35968   |   |        |      | 6.9 heterogeneous nuclear ribonucleoprotein AB isoform a [Homo sapiens]                                  |
| gj 55956921 |                    | 8      | 44     | 27.70%  | 285      | 30588   |   |        |      | 7.9 heterogeneous nuclear ribonucleoprotein AB isoform b [Homo sapiens]                                  |
|             | HsFLAG-p53-DNA-D   | 3.445  | 0.3497 | 1456.46 | 1456.7   | 6618.3  | 2 | 712.4  | 62.5 | 2 K.MFVGGLSWDTSKK.D                                                                                      |
|             | HsFLAG-p53-DNA-D   | 2.7107 | 0.1482 | 929.11  | 929.15   | 2788    | 4 | 617.9  | 85.7 | 1 R.GFGFILFK.D                                                                                           |
|             | HsFLAG-p53-DNA-D   | 5.2679 | 0.2949 | 1633.72 | 1632.854 | 5829.7  | 1 | 1586.1 | 82.1 | 12 K.KIFVGGLNPEATEEK.I                                                                                   |
|             | HsFLAG-p53-DNA-D   | 3.742  | 0.2361 | 1505.67 | 1504.68  | 8395    | 1 | 1575.3 | 76.9 | 1 K.IFVGGLNPEATEEK.I                                                                                     |
|             | HsFLAG-p53-DNA-D   | 5.0639 | 0.1738 | 2214.7  | 2215.479 | 7729.9  | 1 | 1927.1 | 66.7 | 8 R.EYFGEFGEIEAIELPMDPK.L                                                                                |
|             | HsFLAG-ARP6_Ti_1   | 4.6326 | 0.3549 | 1670.23 | 1670.946 | 8906.9  | 1 | 1682.2 | 73.1 | 15 R.GFVFITFKKEEPPVK.K                                                                                   |
|             | HsFLAG-p53-DNA-D   | 4.7012 | 0.3907 | 1798.33 | 1799.12  | 9146.6  | 1 | 1798.3 | 71.4 | 2 R.GFVFITFKKEEPPVK.V                                                                                    |
|             | HsFLAG-p53-DNA-D   | 3.3662 | 0.3027 | 990.51  | 991.135  | 4333.3  | 1 | 601.2  | 81.2 | 3 K.KFHTVSGSK.C                                                                                          |
| gj 12707570 |                    | 4      | 7      | 23.80%  | 290      | 31371   |   |        |      | 8.1 mitochondrial short-chain enoyl-coenzyme A hydratase 1 precursor [Homo sapiens]                      |
| *           | HsFLAG-ARP6_Ti_1   | 3.0923 | 0.2532 | 1467.01 | 1467.712 | 6965.6  | 1 | 760    | 62.5 | 1 K.NNTVGLIQLNRPK.A                                                                                      |
| *           | HsFLAG-ARP6_Ti_1   | 4.4688 | 0.4569 | 1971.47 | 1972.212 | 7085.7  | 1 | 2175.4 | 73.5 | 3 K.ALNALCDGLIDELNQLK.I                                                                                  |
| *           | HsFLAG-p53-DNA-D   | 4.1623 | 0.305  | 2127.69 | 2126.42  | 5882.3  | 1 | 569.6  | 45   | 1 K.AQFAQPEILIGTIPGAGGTQR.L                                                                              |
| *           | HsFLAG-p53-DNA-D   | 4.6246 | 0.4892 | 1991.26 | 1990.19  | 8596.5  | 1 | 1606.2 | 65.6 | 2 K.ICPVETLVEEAIQCAEK.I                                                                                  |
| gj 33946324 |                    | 7      | 20     | 23.70%  | 354      | 40361   |   |        |      | 6 guanine nucleotide binding protein (G protein), alpha inhibiting activity polypeptide 1 [Homo sapiens] |
| *           | HsFLAG-ARP6_Ti_1   | 3.3939 | 0.2836 | 1566.37 | 1565.643 | 5934.3  | 1 | 1364.4 | 83.3 | 1 K.IIHEAGYSEEECK.Q                                                                                      |

|               |                    |        |        |         |          |         |                                                           |        |      |                                        |
|---------------|--------------------|--------|--------|---------|----------|---------|-----------------------------------------------------------|--------|------|----------------------------------------|
|               | HsFLAG-ARP6_Ti_1   | 2.6401 | 0.3146 | 2062.5  | 2064.172 | 12844.4 | 1                                                         | 1031.7 | 50   | 1 R.EYQLNDSAAYYLNDLDR.I                |
|               | HsFLAG-ARP6_Ti_1   | 3.3505 | 0.2431 | 1381.35 | 1381.571 | 5505.5  | 1                                                         | 661.5  | 68.2 | 5 K.TTGIVETHFTFK.D                     |
|               | HsFLAG-ARP6_Ti_1   | 3.8486 | 0.2132 | 1599.42 | 1598.882 | 7907.5  | 1                                                         | 1179.4 | 70.8 | 2 K.WFTDTSIILFLNK.K                    |
|               | HsFLAG-ARP6_Ti_1   | 3.3093 | 0.3202 | 1727.16 | 1727.056 | 5833.3  | 1                                                         | 574.2  | 53.8 | 3 K.WFTDTSIILFLNKK.D                   |
|               | HsFLAG-ARP6_Ti_1   | 3.3771 | 0.3264 | 1587.44 | 1587.692 | 7621.9  | 1                                                         | 909.3  | 66.7 | 2 K.EIYTHFTCATDTK.N                    |
|               | HsFLAG-ARP6_Ti_1   | 3.2254 | 0.2473 | 1708.53 | 1708.995 | 6149.4  | 1                                                         | 791.4  | 57.1 | 6 K.NVQFVFDAVTDVIK.N                   |
| gil57863301 r | 28                 | 118    | 23.60% | 1506    | 164886   | 8.2     | CLIP-associating protein 2 [Homo sapiens]                 |        |      |                                        |
| *             | HsFlag-FLJ20643_Ti | 4.2089 | 0.3234 | 2216.82 | 2217.267 | 5771.8  | 1                                                         | 810.6  | 52.5 | 2 K.SFDDEESVDGNRPSSAASAFK.V            |
| *             | HsH2AZ-FLAG_293_   | 3.5178 | 0.2748 | 1424.41 | 1423.476 | 4544.3  | 1                                                         | 879.4  | 76.9 | 3 K.EGGAGAVDEDDFIK.A                   |
| *             | HsH2AZ-FLAG_293_   | 4.1429 | 0.4213 | 1585.97 | 1584.769 | 3228.7  | 1                                                         | 570.7  | 73.1 | 4 K.AFTDVPSIQIYSSR.E                   |
| *             | HsFLAG-ARP6_Ti_1   | 5.4668 | 0.5053 | 2096.36 | 2097.347 | 7918.3  | 1                                                         | 1795.6 | 67.6 | 18 R.SLLVAGAAQYDCFFQHRL.R              |
| *             | HsFLAG-ARP6_Ti_1   | 4.2194 | 0.4541 | 1713.83 | 1713.938 | 6434.3  | 1                                                         | 846.8  | 60   | 2 R.EACITVAHLSTVLGNK.F                 |
| *             | HsFLAG-ARP6_Ti_1   | 2.7792 | 0.1724 | 2241.09 | 2241.552 | 4561    | 2                                                         | 452.1  | 42.5 | 1 K.FDHGAEAIVPTLFLNLPNSAK.V            |
| *             | HsFlag-NUFIP_Ti_1C | 4.7624 | 0.2619 | 2241.49 | 2241.552 | 5972.7  | 1                                                         | 1764.8 | 46.2 | 2 K.FDHGAEAIVPTLFLNLPNSAK.V            |
| *             | HsFLAG-ARP6_Ti_1   | 5.9791 | 0.4658 | 2392.03 | 2392.673 | 9453.5  | 1                                                         | 1949.3 | 63.9 | 10 R.SFEFLDLLLQEWQTHSLER.H             |
| *             | HsFLAG-UTX1_Ti_2   | 3.5429 | 0.1599 | 2393.62 | 2392.673 | 6215.9  | 3                                                         | 782.8  | 34.7 | 1 R.SFEFLDLLLQEWQTHSLER.H              |
| *             | HsH2AZ-FLAG_293_   | 2.2243 | 0.1094 | 1080.39 | 1081.301 | 4257.4  | 2                                                         | 614.9  | 72.2 | 3 R.HAAVLVETIK.K                       |
| *             | HsFlag-DPCD_Ti_20  | 3.3008 | 0.3023 | 1081.02 | 1081.301 | 8550.3  | 1                                                         | 1404.9 | 83.3 | 2 R.HAAVLVETIK.K                       |
| *             | HsH2AZ-FLAG_293_   | 4.3817 | 0.3979 | 1210.97 | 1209.475 | 5905.6  | 1                                                         | 1462.5 | 90   | 12 R.HAAVLVETIKK.G                     |
| *             | HsFlag-NUFIP_Ti_2C | 3.9997 | 0.3202 | 2324.26 | 2325.496 | 6686.5  | 1                                                         | 993.5  | 39.5 | 4 R.NHFPGEAETLYNSLEPSYQK.S             |
| *             | HsFlag-NUFIP_Ti_1C | 4.9427 | 0.3258 | 2325.65 | 2325.496 | 5351.4  | 1                                                         | 1158.1 | 63.2 | 7 R.NHFPGEAETLYNSLEPSYQK.S             |
| *             | HsH2AZ-FLAG_293_   | 4.0806 | 0.1482 | 1728.2  | 1728.813 | 6019.1  | 1                                                         | 1011.1 | 63.3 | 8 R.SSSSSQESLNRPFSSK.W                 |
| *             | HsFlag-FLJ20643_Ti | 4.3331 | 0.3043 | 1376.51 | 1375.481 | 7248.7  | 1                                                         | 1473.2 | 76.9 | 2 R.SRSDIDVNAAGAK.A                    |
| *             | HsFLAG-TCF3_Ti_1   | 2.5409 | 0.21   | 1033.49 | 1034.123 | 5802.2  | 2                                                         | 476    | 72.2 | 2 K.AHHAAGQSVR.S                       |
| *             | HsFlag-NUFIP_Ti_2C | 3.0105 | 0.3263 | 1620.74 | 1620.844 | 10402.4 | 1                                                         | 926.4  | 53.3 | 1 R.VLTTTALSTVSSGVQR.V                 |
| *             | HsH2AZ-FLAG_293_   | 2.6223 | 0.2099 | 1017.66 | 1017.17  | 4163.6  | 9                                                         | 533.6  | 77.8 | 1 R.VLVNSASAQK.R                       |
| *             | HsH2AZ-FLAG_293_   | 3.8171 | 0.4328 | 1681.34 | 1681.845 | 5376.6  | 1                                                         | 1130   | 76.7 | 5 R.SFQPLGPGYGISQSSR.L                 |
| *             | HsH2AZ-FLAG_293_   | 4.6897 | 0.467  | 1731.76 | 1731.897 | 8033.7  | 1                                                         | 2014.3 | 71.9 | 4 R.VLNTGSDVEEAVADALK.K                |
| *             | HsH2AZ-FLAG_293_   | 4.7754 | 0.4052 | 1551.23 | 1551.564 | 9639.9  | 1                                                         | 2155.9 | 73.3 | 5 R.AGGDATDSSQTALDNK.A                 |
| *             | HsH2AZ-FLAG_293_   | 3.4856 | 0.2878 | 1924.37 | 1925.018 | 6850.2  | 1                                                         | 985.9  | 60   | 1 R.DYNPYNYSISPFNK.S                   |
| *             | HsFlag-FLJ90652_2C | 5.0632 | 0.4171 | 1442.97 | 1442.78  | 10047   | 1                                                         | 2191   | 83.3 | 10 K.TILLLLETLGDK.E                    |
| *             | HsFLAG-ARP5_Ti_1   | 3.3754 | 0.2498 | 2039.67 | 2039.464 | 8863.7  | 2                                                         | 648.7  | 44.1 | 2 K.TILLLLETLGDKPTIR.A                 |
| *             | HsFLAG-ARP5_Ti_1   | 3.3745 | 0.2438 | 1660.51 | 1659.886 | 5241.6  | 1                                                         | 743    | 69.2 | 2 K.TLEAHKDPHKEVVR.S                   |
| *             | HsH2AZ-FLAG_293_   | 5.2582 | 0.4941 | 2114.01 | 2114.499 | 7264.5  | 1                                                         | 1341.9 | 61.1 | 3 K.VLCPHQADYDIPINLAAIK.M              |
| *             | HsFlag-FLJ90652_2C | 2.5684 | 0.33   | 1792.58 | 1792.814 | 10002.9 | 1                                                         | 497    | 41.7 | 1 K.RAQTGSGGADPTTDVSGQS.-              |
| gil4502891 re | 3                  | 12     | 23.60% | 237     | 26215    | 4.1     | chloride channel, nucleotide-sensitive, 1A [Homo sapiens] |        |      |                                        |
| *             | HsFLAG-TCF3_Ti_1   | 6.3018 | 0.4722 | 2721.01 | 2721.085 | 9282.8  | 1                                                         | 2159.3 | 39.6 | 8 R.LSWLDGSGLGFSLYPTISLHALSR.D         |
| *             | HsFLAG-TCF3_Ti_1   | 2.937  | 0.4185 | 2721.16 | 2721.085 | 6900.6  | 1                                                         | 296.5  | 31.2 | 3 R.LSWLDGSGLGFSLYPTISLHALSR.D         |
| *             | HsFlag-FLJ20643_Ti | 5.656  | 0.4436 | 3460.72 | 3459.543 | 6075.4  | 1                                                         | 1207.4 | 34.2 | 1 R.TEDSIRDYEDGMEVDTTPTVAGQFEDADV.DH.- |
| gil55770900 r | 4                  | 14     | 23.50% | 353     | 41401    | 9.9     | BRIX [Homo sapiens]                                       |        |      |                                        |
| *             | HsFLAG-ARP6_Ti_1   | 4.2541 | 0.3073 | 1525.95 | 1526.819 | 8265.9  | 1                                                         | 2580.8 | 91.7 | 8 K.FLVQNIHTLAEK.M                     |
| *             | HsFLAG-ARP6_Ti_1   | 5.0567 | 0.3247 | 2487.75 | 2487.861 | 6468.5  | 1                                                         | 1241.8 | 40.5 | 2 K.GSRPLSFDPAFDELPHYALLK.E            |
| *             | HsFLAG-ARP6_Ti_1   | 3.1118 | 0.3424 | 2037.83 | 2037.282 | 5377.4  | 1                                                         | 411.7  | 46.9 | 1 K.SQPFVDHVFTTILDNR.I                 |

|             |                    |        |        |         |          |        |   |        |      |    |                                                                     |
|-------------|--------------------|--------|--------|---------|----------|--------|---|--------|------|----|---------------------------------------------------------------------|
| *           | HsFLAG-p53-DNA-D   | 5.5482 | 0.4413 | 3525.79 | 3527.055 | 7139.3 | 1 | 1409.5 | 32.5 | 3  | K.TLLPHDPTADVFTPAEEKPIEQWVKPEPK.V                                   |
| gi 33383233 | r                  | 11     | 21     | 23.40%  | 796      | 90251  |   |        |      |    | 5.7 arsenate resistance protein ARS2 isoform b [Homo sapiens]       |
| gi 58331218 | r                  | 11     | 21     | 21.20%  | 876      | 100667 |   |        |      |    | 6 arsenate resistance protein ARS2 isoform a [Homo sapiens]         |
|             | HsFLAG-FLJ20729_   | 4.9702 | 0.3022 | 2727.45 | 2727.899 | 9049.8 | 2 | 1226.8 | 33.7 | 1  | R.ILEQEEEEEQAGKPGEPSKKEEGR.A                                        |
|             | HsFLAG-p53-DNA-D   | 3.5979 | 0.2262 | 1557.61 | 1557.744 | 6701.8 | 2 | 787.3  | 72.7 | 1  | K.EKPKEEEWEKPK.D                                                    |
|             | HsFLAG-Lin9_Ti_20  | 2.7285 | 0.2284 | 1593.42 | 1592.805 | 8568.3 | 3 | 512.4  | 53.8 | 1  | K.DAAGLECKPRPLHK.T                                                  |
|             | HsFlag-NUFIP_Ti_20 | 4.172  | 0.3132 | 1430.44 | 1430.57  | 9815.5 | 1 | 1608.8 | 77.3 | 5  | R.LRECELSPGVNR.D                                                    |
|             | HsFLAG-p53-DNA-D   | 2.3799 | 0.0838 | 1024.61 | 1025.153 | 4130   | 3 | 351    | 75   | 1  | R.NINGITQHK.Q                                                       |
|             | HsFLAG-p53-DNA-D   | 4.1823 | 0.3992 | 2672.59 | 2674.069 | 5469.7 | 1 | 538    | 41.7 | 3  | R.TQLWASEPGTTPPLPTSLPSQNPILK.N                                      |
|             | HsFLAG-Lin9_Ti_20  | 3.6025 | 0.3081 | 4510.48 | 4510.82  | 6215.1 | 1 | 555.9  | 20.1 | 1  | R.D                                                                 |
|             | HsARP6-FLAG_Ti_1   | 3.2034 | 0.2009 | 1326.86 | 1326.495 | 7466.7 | 1 | 1315.4 | 85   | 1  | R.ISHGCVLEWQK.T                                                     |
|             | HsFLAG-p53-DNA-D   | 3.2904 | 0.2397 | 1467.24 | 1467.619 | 6924.6 | 1 | 775.4  | 66.7 | 1  | K.FVTSNTQELGKDK.W                                                   |
|             | HsARP6-FLAG_Ti_1   | 4.4664 | 0.4243 | 1519.22 | 1516.693 | 6056.9 | 1 | 1367   | 87.5 | 5  | K.EVAFFNFLTDAK.R                                                    |
|             | HsFlag-VPS71_Ti_1  | 1.8593 | 0.1525 | 1268.49 | 1269.307 | 4698   | 9 | 390.4  | 60   | 1  | R.DLDAPDDVDF.-                                                      |
| gi 42657272 | r                  | 3      | 7      | 23.40%  | 124      | 13614  |   |        |      |    | 10.1 PREDICTED: similar to 40S ribosomal protein S25 [Homo sapiens] |
| gi 88988836 | r                  | 3      | 7      | 23.40%  | 124      | 13615  |   |        |      |    | 10 PREDICTED: similar to 40S ribosomal protein S25 [Homo sapiens]   |
| gi 4506707  | re                 | 3      | 7      | 23.20%  | 125      | 13742  |   |        |      |    | 10.1 ribosomal protein S25 [Homo sapiens]                           |
|             | HsFlag-NUFIP_Ti_1  | 3.7256 | 0.2251 | 1076.38 | 1076.281 | 6297.2 | 7 | 1060   | 87.5 | 5  | K.LNNLVLFDK.A                                                       |
|             | HsFLAG-ARP8_Ti_2   | 3.2755 | 0.1862 | 973.33  | 973.158  | 6103.8 | 1 | 1253.5 | 93.8 | 1  | R.AALQELLSK.G                                                       |
|             | HsFLAG-p53-DNA-D   | 1.8649 | 0.2027 | 930.34  | 930.904  | 4773.4 | 6 | 347.7  | 50   | 1  | K.GGDAPAAGEDA.-                                                     |
| gi 22208967 | r                  | 2      | 16     | 23.40%  | 107      | 11676  |   |        |      |    | 10.3 high mobility group AT-hook 1 isoform a [Homo sapiens]         |
| gi 22208977 | r                  | 2      | 16     | 23.40%  | 107      | 11676  |   |        |      |    | 10.3 high mobility group AT-hook 1 isoform a [Homo sapiens]         |
| gi 22208971 | r                  | 2      | 16     | 23.40%  | 107      | 11676  |   |        |      |    | 10.3 high mobility group AT-hook 1 isoform a [Homo sapiens]         |
|             | HsFLAG-ARP6_Ti_1   | 3.4573 | 0.3357 | 1594.94 | 1594.852 | 3413.2 | 1 | 567.3  | 73.3 | 14 | R.KQPPVSPGTALVGSQK.E                                                |
|             | HsFLAG-p53-DNA-D   | 3.8524 | 0.2649 | 2559.05 | 2559.922 | 5036.6 | 1 | 282.6  | 37.5 | 2  | R.KQPPVSPGTALVGSQKPESEVPTPK.R                                       |
| gi 4758030  | re                 | 16     | 34     | 23.30%  | 1224     | 138331 |   |        |      |    | 7.7 coatomer protein complex, subunit alpha [Homo sapiens]          |
| *           | HsFLAG-Lin9_Ti_20  | 3.5137 | 0.297  | 1593.18 | 1593.817 | 6436.3 | 1 | 712    | 60   | 1  | R.GITGVDLFGTTDAVVK.H                                                |
| *           | HsSrcap_Ti_204.323 | 4.1993 | 0.369  | 2254.69 | 2255.556 | 8651.4 | 1 | 1125.6 | 36.2 | 4  | R.GVNWAAFHPTMPLIVSGADDR.Q                                           |
| *           | HsSrcap_Ti_204.322 | 4.2859 | 0.3631 | 2257.8  | 2255.556 | 4829.2 | 1 | 556.2  | 50   | 2  | R.GVNWAAFHPTMPLIVSGADDR.Q                                           |
| *           | HsFLAG-Lin9_Ti_20  | 4.4415 | 0.3817 | 1829.58 | 1830.001 | 8320.2 | 1 | 1526.1 | 66.7 | 2  | R.ASNLENSTYDLYTIPK.D                                                |
| *           | HsSrcap_Ti_204.304 | 4.2461 | 0.3784 | 2409.22 | 2408.726 | 4504.6 | 1 | 685.3  | 52.5 | 1  | K.KVQVPNCDEFYAGTGNLLLR.D                                            |
| *           | HsSrcap_Ti_202.019 | 2.2179 | 0.2881 | 1479.56 | 1480.615 | 5897.6 | 1 | 564.1  | 62.5 | 1  | R.DADSITLFDVQK.R                                                    |
| *           | HsSrcap_Ti_205.192 | 3.5661 | 0.144  | 1597.76 | 1596.793 | 9542.4 | 1 | 1078.6 | 66.7 | 2  | R.KLDALCNIHENIR.V                                                   |
| *           | HsSrcap_Ti_203.160 | 2.0707 | 0.1925 | 1302.63 | 1303.461 | 4712.4 | 3 | 297.3  | 50   | 1  | K.YAVTTGDHGIIR.T                                                    |
| *           | HsSrcap_Ti_203.288 | 3.8403 | 0.2878 | 1334.42 | 1333.614 | 6739.7 | 1 | 1563.9 | 86.4 | 2  | K.LVGQSIIAYLQK.K                                                    |
| *           | HsSrcap_Ti_206.241 | 3.7404 | 0.2195 | 1761.8  | 1761.031 | 6630.1 | 1 | 879.9  | 67.9 | 1  | K.KGYPEVALHFVKDEK.T                                                 |
| *           | HsSrcap_Ti_203.386 | 4.1851 | 0.3325 | 4161.47 | 4161.52  | 9917.8 | 1 | 755.3  | 21.6 | 1  | K.SLAYLTAATHGLDEEAESLKETFDPEKETIPDIDPNAK.L                          |
| *           | HsFlag-VPS71_Ti_1  | 2.8243 | 0.2387 | 2444.72 | 2445.966 | 3989.5 | 2 | 241.8  | 40.5 | 1  | K.LLQPPAPIMPLDTNWPLLTVSK.G                                          |
| *           | HsSrcap_Ti_205.250 | 4.6977 | 0.4372 | 1714.5  | 1715.005 | 5632.3 | 1 | 1311.3 | 75   | 10 | R.LLHDQVGVQFGPYK.Q                                                  |
| *           | HsSrcap_Ti_204.459 | 2.5546 | 0.0882 | 3165.19 | 3165.708 | 7842.8 | 2 | 327.3  | 27.8 | 1  | R.SILLSVPLLVDNKGIEAQAQQLITICR.E                                     |
| *           | HsFlag-VPS71_Ti_1  | 3.5339 | 0.4028 | 1679.85 | 1679.957 | 4443.6 | 1 | 768.1  | 71.4 | 3  | R.LLELGPKEVAQQR.K                                                   |
| *           | HsSrcap_Ti_204.307 | 3.8907 | 0.3599 | 3406.48 | 3407.707 | 9772.8 | 1 | 759.3  | 24.1 | 1  | K.NPTDAYQLNYDMHNPFDICAASYRPIYR.G                                    |
| gi 4507879  | re                 | 4      | 9      | 23.30%  | 283      | 30773  |   |        |      |    | 8.5 voltage-dependent anion channel 1 [Homo sapiens]                |

|             |                    |        |        |         |          |         |   |        |      |   |                                                                                   |
|-------------|--------------------|--------|--------|---------|----------|---------|---|--------|------|---|-----------------------------------------------------------------------------------|
| *           | HsFLAG-ARP6_Ti_1   | 3.739  | 0.4251 | 1960.84 | 1961.003 | 6045.9  | 1 | 877.2  | 55.6 | 2 | K.SENGLEFTSSGSANTETTK.V                                                           |
| *           | HsFLAG-ARP6_Ti_1   | 3.2695 | 0.3758 | 1528.35 | 1529.69  | 8495.5  | 1 | 1167.3 | 65.4 | 2 | K.LTFDSSFSPNTGKK.N                                                                |
| *           | HsFLAG-ARP6_Ti_1   | 3.2206 | 0.2895 | 1458.19 | 1457.629 | 7277.7  | 1 | 1100.3 | 75   | 1 | K.SRVTQSNFAVGKY.T                                                                 |
| *           | HsFLAG-ARP6_Ti_1   | 4.1017 | 0.3766 | 2103.7  | 2104.455 | 5099.5  | 1 | 532.2  | 47.4 | 4 | K.VNNSLIGLGYTQLKPGIK.L                                                            |
| gi 14150124 | r                  | 3      | 11     | 23.30%  | 129      | 15225   |   |        |      |   | 10.4 hypothetical protein LOC84298 [Homo sapiens]                                 |
| gi 88959164 | r                  | 3      | 11     | 23.30%  | 129      | 15441   |   |        |      |   | 10.1 PREDICTED: hypothetical protein XP_943746 [Homo sapiens]                     |
| gi 88953955 | r                  | 3      | 11     | 23.30%  | 129      | 15441   |   |        |      |   | 10.1 PREDICTED: hypothetical protein XP_934680 [Homo sapiens]                     |
|             | HsFLAG-ARP6_Ti_1   | 3.9978 | 0.3959 | 1523.34 | 1523.813 | 5935.7  | 1 | 1236.7 | 73.1 | 2 | K.DVQEIATVVVPPKPK.H                                                               |
|             | HsFlag-NUFIP_Ti_1C | 4.9091 | 0.4628 | 2000.67 | 2001.27  | 7398.6  | 1 | 1262.1 | 66.7 | 7 | K.TLLDQHGQYPIWMNQR.Q                                                              |
|             | HsFlag-NUFIP_Ti_1C | 4.4023 | 0.1295 | 2002.22 | 2001.27  | 5816    | 5 | 978.4  | 45   | 2 | K.TLLDQHGQYPIWMNQR.Q                                                              |
| gi 4557641  | re                 | 7      | 21     | 23.20%  | 488      | 55325   |   |        |      |   | 5.8 histone deacetylase 2 [Homo sapiens]                                          |
|             | HsFLAG-p53-DNA-D   | 4.2556 | 0.3406 | 1608.84 | 1608.899 | 9133.6  | 1 | 1844.7 | 79.2 | 3 | R.MTHNLLLNLYGLYR.K                                                                |
|             | HsH2AZ-FLAG_293_   | 3.9749 | 0.1887 | 1428.75 | 1427.572 | 6906    | 1 | 1117.8 | 72.7 | 3 | R.SIRPDNMSEYSK.Q                                                                  |
| *           | HsH2AZ-FLAG_293_   | 3.0291 | 0.3309 | 1863.28 | 1865.076 | 7357.4  | 1 | 852    | 53.1 | 4 | R.QQTDMAVNWAGGLHHAK.K                                                             |
|             | HsARP6-FLAG_Ti_1   | 2.7103 | 0.2598 | 1375.1  | 1375.48  | 4614.8  | 1 | 500.1  | 68.2 | 1 | K.YGEYFPGTGDLR.D                                                                  |
| *           | HsFlag-VPS71_Ti_1C | 4.5171 | 0.4227 | 2513.79 | 2514.794 | 5256.9  | 1 | 996    | 52.3 | 2 | K.VMEMYQPSAVVLQCGADSLSGDR.L                                                       |
| *           | HsFLAG-p53-DNA-D   | 4.8037 | 0.3953 | 1824.05 | 1824.191 | 7391.9  | 1 | 1467.1 | 71.9 | 3 | K.TFNLPLLMLGGGGYTIR.N                                                             |
| *           | HsFlag-VPS71_Ti_1C | 5.9957 | 0.4438 | 2235.2  | 2235.491 | 6953.5  | 1 | 1881.6 | 72.2 | 5 | K.LHISPSNMTNQNTPEYMEK.I                                                           |
| gi 4758394  | re                 | 6      | 16     | 23.20%  | 379      | 41685   |   |        |      |   | 5.3 flotillin 2 [Homo sapiens]                                                    |
| *           | HsFLAG-ARP6_Ti_1   | 4.0645 | 0.3115 | 1380.33 | 1379.602 | 8423.6  | 1 | 2179.7 | 86.4 | 4 | K.NVVLQTLLEGHLR.S                                                                 |
| *           | HsFLAG-ARP6_Ti_1   | 3.415  | 0.1022 | 1738.33 | 1736.963 | 10851.3 | 1 | 1055.7 | 57.1 | 1 | R.SILGTLTVEIQYQDR.D                                                               |
| *           | HsFLAG-ARP6_Ti_1   | 4.802  | 0.3652 | 1521.2  | 1521.67  | 8176.9  | 1 | 2262.1 | 80.8 | 2 | K.TAEAQLAYELQGAR.E                                                                |
| *           | HsFLAG-ARP6_Ti_1   | 4.0853 | 0.3537 | 1388.83 | 1389.607 | 7945.4  | 1 | 1770.7 | 73.1 | 2 | K.IGEAEEAAVIEAMGK.A                                                               |
| *           | HsFLAG-ARP6_Ti_1   | 4.6754 | 0.2933 | 1468.88 | 1468.838 | 5913.8  | 1 | 1759.9 | 80.8 | 3 | K.MALVLEALPQIAAK.I                                                                |
| *           | HsFLAG-ARP6_Ti_1   | 5.5499 | 0.5431 | 1934.46 | 1935.271 | 3874.3  | 1 | 835.4  | 63.9 | 4 | R.LLAELPASVHALTGVDLSK.I                                                           |
| gi 38045913 | r                  | 3      | 6      | 23.20%  | 177      | 19654   |   |        |      |   | 5.6 non-metastatic cells 1, protein (NM23A) expressed in isoform a [Homo sapiens] |
| gi 4557797  | re                 | 3      | 6      | 27.00%  | 152      | 17149   |   |        |      |   | 6.2 non-metastatic cells 1, protein (NM23A) expressed in isoform b [Homo sapiens] |
|             | HsFLAG-p53-DNA-D   | 2.7564 | 0.1325 | 1151.25 | 1150.366 | 8005    | 2 | 1179.8 | 83.3 | 1 | K.DRPFFAGLVK.Y                                                                    |
|             | HsFLAG-ARP6_Ti_1   | 4.4463 | 0.3575 | 1787.15 | 1787.041 | 6441.4  | 1 | 868.6  | 59.4 | 3 | R.VMLGETNPADSKPGTIR.G                                                             |
|             | HsFlag-FLJ90652_2  | 3.4402 | 0.3263 | 1486.14 | 1486.579 | 5218.9  | 1 | 794.1  | 73.1 | 2 | R.NIIHGSDSVESAEK.E                                                                |
| gi 21359867 | r                  | 9      | 28     | 23.10%  | 325      | 35390   |   |        |      |   | 9 cytochrome c-1 [Homo sapiens]                                                   |
| *           | HsSrcap_Ti_204.210 | 2.8328 | 0.3596 | 1298.6  | 1299.47  | 5065.7  | 1 | 325.3  | 54.5 | 2 | R.GLLSSLDHTSIR.R                                                                  |
| *           | HsSrcap_Ti_204.210 | 3.421  | 0.3621 | 1300.57 | 1299.47  | 8634.2  | 1 | 1216.9 | 68.2 | 5 | R.GLLSSLDHTSIR.R                                                                  |
| *           | HsSrcap_Ti_203.160 | 3.2245 | 0.3542 | 1520.53 | 1521.633 | 7006.1  | 1 | 981    | 62.5 | 2 | R.HLVGVCYTEDEAK.E                                                                 |
| *           | HsSrcap_Ti_203.161 | 3.8653 | 0.2576 | 1521.36 | 1521.633 | 4746.8  | 1 | 1106.4 | 83.3 | 2 | R.HLVGVCYTEDEAK.E                                                                 |
| *           | HsScrap_Ti_105.231 | 3.3517 | 0.3422 | 1915.48 | 1916.143 | 3876.5  | 1 | 568.4  | 60   | 2 | K.LFDYFPKYPNSEEAR.A                                                               |
| *           | HsSrcap_Ti_203.228 | 3.7137 | 0.2931 | 1916.5  | 1916.143 | 4832.9  | 1 | 707.6  | 40   | 1 | K.LFDYFPKYPNSEEAR.A                                                               |
| *           | HsSrcap_Ti_204.369 | 5.7456 | 0.2571 | 2655.38 | 2655.89  | 8689.2  | 1 | 1766.5 | 38   | 3 | R.HGGEDYVFSLLTGYCEPPTGVSLR.E                                                      |
| *           | HsSrcap_Ti_204.369 | 5.8755 | 0.485  | 2655.88 | 2655.89  | 7766.9  | 1 | 1655.1 | 54.3 | 9 | R.HGGEDYVFSLLTGYCEPPTGVSLR.E                                                      |
| *           | HsSrcap_Ti_203.122 | 2.7344 | 0.3054 | 1264.5  | 1264.299 | 5888.8  | 1 | 876.6  | 83.3 | 2 | R.WASEPEHHR.K                                                                     |
| gi 4506723  | re                 | 5      | 39     | 23.10%  | 264      | 29945   |   |        |      |   | 9.7 ribosomal protein S3a [Homo sapiens]                                          |
|             | HsFLAG-ARP6_Ti_1   | 2.6958 | 0.2261 | 919.73  | 920.117  | 4582    | 1 | 882    | 92.9 | 2 | K.APAMFNIR.N                                                                      |
|             | HsFLAG-ARP6_Ti_1   | 5.3162 | 0.3754 | 1954.19 | 1953.159 | 9005.6  | 1 | 1457.3 | 65.6 | 9 | R.VFEVSLADLQNDVAFR.K                                                              |

|             |                     |        |        |         |          |         |   |                                                                    |      |    |                                      |  |
|-------------|---------------------|--------|--------|---------|----------|---------|---|--------------------------------------------------------------------|------|----|--------------------------------------|--|
|             | HsFLAG-ARP6_Ti_1    | 2.4371 | 0.2371 | 1002.2  | 1003.141 | 6614.1  | 8 | 656.9                                                              | 75   | 2  | K.LITEDVQGK.N                        |  |
|             | HsFlag-NUFIP_Ti_1C  | 4.526  | 0.2731 | 1579.68 | 1579.737 | 7557    | 1 | 2218.3                                                             | 87.5 | 10 | K.NCLTNFHGMDLTR.D                    |  |
|             | HsFLAG-ARP6_Ti_1    | 4.4478 | 0.4012 | 1705.36 | 1705.92  | 4182.9  | 1 | 949.7                                                              | 76.9 | 16 | K.ACQSIYPLHDFVFR.K                   |  |
| gi 72534660 |                     | 5      | 54     | 23.10%  | 238      | 27367   |   | 11.8 splicing factor, arginine/serine-rich 7, 35kDa [Homo sapiens] |      |    |                                      |  |
| *           | HsFLAG-ARP6_Ti_1    | 4.2533 | 0.3437 | 1719.73 | 1720.923 | 7166.5  | 1 | 994.3                                                              | 59.4 | 15 | K.VYVGNLGTGAGKGELER.A                |  |
| *           | HsFLAG-ARP6_Ti_2    | 2.961  | 0.2818 | 1074.47 | 1074.224 | 5976.7  | 1 | 958.2                                                              | 87.5 | 1  | R.AFSYYGPLR.T                        |  |
|             | HsFLAG-ARP6_Ti_2    | 3.9808 | 0.2277 | 1621.89 | 1622.777 | 5591.6  | 1 | 1081.1                                                             | 76.9 | 35 | R.NPPGFAFVFEFEDPR.D                  |  |
| *           | HsFlag-NUFIP_Ti_1C  | 3.7728 | 0.3106 | 2378.86 | 2379.547 | 4898.2  | 4 | 317.5                                                              | 42.5 | 2  | R.NPPGFAFVFEFEDPRDAEDAVR.G           |  |
| *           | HsFLAG-UTX1_Ti_2    | 2.6091 | 0.1545 | 1017.15 | 1017.089 | 3366.7  | 9 | 648.3                                                              | 100  | 1  | R.RPFDPNDR.C                         |  |
| gi 5729875  |                     | 2      | 6      | 23.10%  | 195      | 21671   |   | 4.7 progesterone receptor membrane component 1 [Homo sapiens]      |      |    |                                      |  |
| *           | HsFLAG-ARP6_Ti_1    | 4.2895 | 0.4454 | 1518.99 | 1517.684 | 5745.1  | 1 | 1703.2                                                             | 88.5 | 4  | K.FYGPEGPYGVFAGR.D                   |  |
| *           | HsFLAG-ARP6_Ti_1    | 5.7667 | 0.4    | 3627.04 | 3625.835 | 8959.5  | 1 | 1418.9                                                             | 29.2 | 2  | K.EALKDEYDDLSDLTAAQQETLSDWESQFTFK.Y  |  |
| gi 15431306 |                     | 5      | 28     | 23.00%  | 257      | 28025   |   | 11 ribosomal protein L8 [Homo sapiens]                             |      |    |                                      |  |
| gi 4506663  |                     | 5      | 28     | 23.00%  | 257      | 28025   |   | 11 ribosomal protein L8 [Homo sapiens]                             |      |    |                                      |  |
|             | HsFLAG-TCF3_Ti_1    | 3.8273 | 0.2217 | 3396.71 | 3397.844 | 11958.2 | 1 | 888.7                                                              | 24.2 | 1  | K.KAQLNIGNVLPVGTMPPEGTIVCCLEEKPGDR.G |  |
|             | HsFLAG-ARP6_Ti_1    | 4.3435 | 0.3177 | 1691.74 | 1689.822 | 7282.8  | 1 | 1170.8                                                             | 63.3 | 14 | R.ASGNYATVISHNPETK.K                 |  |
|             | HsFLAG-ARP6_Ti_1    | 4.1795 | 0.359  | 1816.92 | 1817.996 | 8121.4  | 1 | 1098.4                                                             | 59.4 | 4  | R.ASGNYATVISHNPETKK.T                |  |
|             | HsFLAG-p53-DNA-D    | 3.1319 | 0.3564 | 941.43  | 942.106  | 6967    | 4 | 621.6                                                              | 70   | 3  | R.AVVGVVAGGGR.I                      |  |
|             | HsFlag-les6_293_Ti_ | 3.6954 | 0.3255 | 942.39  | 942.106  | 6292.5  | 1 | 1732.4                                                             | 85   | 6  | R.AVVGVVAGGGR.I                      |  |
| gi 15431290 |                     | 4      | 18     | 23.00%  | 178      | 20252   |   | 9.6 ribosomal protein L11 [Homo sapiens]                           |      |    |                                      |  |
| *           | HsFLAG-TCF3_Ti_1    | 3.2025 | 0.4065 | 1546.59 | 1547.792 | 4409.8  | 1 | 379                                                                | 61.5 | 1  | K.VLEQLTGQTPVFSK.A                   |  |
| *           | HsFlag-NUFIP_Ti_1C  | 4.1573 | 0.3317 | 1547.93 | 1547.792 | 8832.2  | 1 | 1468                                                               | 69.2 | 4  | K.VLEQLTGQTPVFSK.A                   |  |
| *           | HsFLAG-ARP6_Ti_1    | 4.036  | 0.4568 | 2047.2  | 2048.346 | 7344.2  | 1 | 1384                                                               | 64.7 | 11 | K.YDPSIGIYGLDFYVVLGR.P               |  |
| *           | HsFlag-les6_293_Ti_ | 3.0966 | 0.1225 | 976.2   | 976.161  | 4106.8  | 1 | 874.9                                                              | 87.5 | 2  | K.YDGIILPGK.-                        |  |
| gi 4507793  |                     | 2      | 3      | 23.00%  | 152      | 17138   |   | 6.6 ubiquitin-conjugating enzyme E2N [Homo sapiens]                |      |    |                                      |  |
| *           | HsFLAG-p53-DNA-D    | 4.1595 | 0.2133 | 2197.99 | 2197.455 | 7031.5  | 1 | 912.4                                                              | 52.6 | 1  | R.YFHVVIAGPQDSPFEGGTFK.L             |  |
| *           | HsFLAG-FLJ20729_    | 3.3242 | 0.2429 | 1748.34 | 1749.075 | 3808    | 1 | 582.4                                                              | 60.7 | 2  | K.LELFLPEEYPMAPK.V                   |  |
| gi 4507955  |                     | 9      | 38     | 22.90%  | 414      | 44713   |   | 6.3 YY1 transcription factor [Homo sapiens]                        |      |    |                                      |  |
| *           | HsFLAG-ARP5_Ti_1    | 4.1224 | 0.4295 | 1919.43 | 1921.077 | 7414.4  | 1 | 1228.5                                                             | 39.3 | 1  | K.KSYLSSGAGAAGGGGADPGNKK.W           |  |
| *           | Hs293Flag-les2_Ti_1 | 5.919  | 0.484  | 1664.15 | 1664.729 | 5467.2  | 1 | 1319.7                                                             | 68.4 | 14 | K.SYLSGGAGAAGGGGADPGNK.K             |  |
| *           | HsFLAG-ARP5_Ti_1    | 3.6711 | 0.2141 | 1793.21 | 1792.903 | 5006.9  | 1 | 376.5                                                              | 42.5 | 2  | K.SYLSGGAGAAGGGGADPGNKK.W            |  |
| *           | HsFlag-FLJ90652_2   | 2.5824 | 0.3777 | 3195.85 | 3197.408 | 7687.1  | 1 | 366.5                                                              | 29.6 | 1  | K.DIDHETVVEEQIIGENSPPDYSEYMTGK.K     |  |
|             | HsFLAG-ARP5_Ti_1    | 4.0803 | 0.427  | 2360.62 | 2361.551 | 7768    | 1 | 480.6                                                              | 42.1 | 1  | R.HQLVHTGEKPFQCTFEGCGK.R             |  |
|             | HsFLAG-ARP8_Ti_2    | 3.0856 | 0.2641 | 1331.33 | 1331.4   | 10549.1 | 1 | 1172.6                                                             | 75   | 1  | K.PFQCTFEGCGK.R                      |  |
| *           | HsFlag-FLJ90652_2   | 3.7893 | 0.3898 | 2036.67 | 2037.171 | 5707.4  | 1 | 626.1                                                              | 56.2 | 5  | R.IHTGDRPYVCPFDGCNK.K                |  |
| *           | HsFlag-FLJ90652_2   | 2.6186 | 0.0828 | 907.13  | 907.06   | 4683    | 8 | 724.6                                                              | 85.7 | 1  | K.SHILTHAK.A                         |  |
| *           | HsFLAG-Lin9_Ti_20   | 2.5003 | 0.2271 | 907.28  | 907.06   | 4643.9  | 3 | 392.7                                                              | 71.4 | 12 | K.SHILTHAK.A                         |  |
| gi 18426915 |                     | 8      | 10     | 22.80%  | 649      | 71439   |   | 4.5 drebrin 1 isoform a [Homo sapiens]                             |      |    |                                      |  |
| *           | HsFLAG-Lin9_Ti_20   | 4.9254 | 0.3819 | 3678.99 | 3679.97  | 12164.2 | 1 | 882.9                                                              | 22.6 | 1  | R.LELLAAYEEVIREESAADWALYTYEDGSDDLK.L |  |
| *           | HsFLAG-ARP6_Ti_1    | 2.5715 | 0.2161 | 2277.7  | 2279.332 | 7744.4  | 1 | 517.2                                                              | 42.1 | 1  | R.EESAADWALYTYEDGSDDLK.L             |  |
|             | HsFLAG-Lin9_Ti_20   | 5.4035 | 0.4495 | 2072.7  | 2073.227 | 9162.1  | 1 | 1441.1                                                             | 57.9 | 2  | K.LAASGEGGLQELSGHFENQK.V             |  |
|             | HsFLAG-Lin9_Ti_20   | 4.0594 | 0.2873 | 1748.3  | 1746.96  | 8676.9  | 1 | 1442.3                                                             | 71.4 | 1  | K.YVLINWVGEDVPDAR.K                  |  |
|             | HsFLAG-Lin9_Ti_20   | 2.7391 | 0.2196 | 909.18  | 909.076  | 6081.7  | 1 | 726.4                                                              | 85.7 | 1  | R.LSSPVLHR.L                         |  |

|               |                   |        |        |         |          |         |   |        |      |    |                                                                               |
|---------------|-------------------|--------|--------|---------|----------|---------|---|--------|------|----|-------------------------------------------------------------------------------|
|               | HsFLAG-ARP6_Ti_1  | 5.5983 | 0.4576 | 1851.55 | 1850.98  | 5489.5  | 1 | 1794.9 | 83.3 | 2  | R.LREDENAEPVGTTYQK.T                                                          |
|               | HsFLAG-Lin9_Ti_20 | 3.87   | 0.3008 | 2311.37 | 2311.514 | 5718.4  | 2 | 484.4  | 30   | 1  | K.KSESEVEEAAAIIAQRPNPR.E                                                      |
|               | HsFLAG-Lin9_Ti_20 | 3.5437 | 0.2159 | 3848.99 | 3849.197 | 5874.6  | 1 | 411.2  | 22.1 | 1  | R.ALDEVTSSQPPLPPPPPAQETQEPSPILDSEETR.A                                        |
| gi 23397427 r |                   | 10     | 35     | 22.60%  | 623      | 69633   |   |        |      |    | 8.6 synaptotagmin binding, cytoplasmic RNA interacting protein [Homo sapiens] |
| *             | HsFLAG-p53-DNA-D  | 5.3904 | 0.4517 | 2334.86 | 2335.662 | 8267.2  | 1 | 1740.4 | 60   | 2  | R.AIEALKEFNEDGALAVLQQFK.D                                                     |
| *             | HsFLAG-FLJ20729_  | 5.5711 | 0.3737 | 1710.51 | 1709.896 | 8411.2  | 1 | 1763.7 | 71.4 | 6  | K.EFNEDGALAVLQQFK.D                                                           |
| *             | HsFLAG-p53-DNA-D  | 3.0339 | 0.1662 | 1143.54 | 1143.199 | 9676.1  | 5 | 899.3  | 72.2 | 2  | K.DSDLSHVQNK.S                                                                |
| *             | HsFlag-VPS71_Ti_1 | 4.7602 | 0.457  | 2570.01 | 2567.814 | 6623.4  | 1 | 820.1  | 45.8 | 2  | K.YGGPPPSVYSGQQPSVGTEIFVGK.I                                                  |
| *             | HsARP6-FLAG_Ti_1  | 4.4061 | 0.1713 | 1595.65 | 1594.802 | 4095    | 3 | 975.8  | 79.2 | 8  | R.DLFEDELVPLFEK.A                                                             |
| *             | HsFLAG-p53-DNA-D  | 3.3671 | 0.134  | 1059.18 | 1059.17  | 6865    | 2 | 880.6  | 85.7 | 2  | K.LYNNHEIR.S                                                                  |
| *             | HsFLAG-Lin9_Ti_20 | 3.094  | 0.2787 | 1943.18 | 1944.149 | 11374.5 | 2 | 640.8  | 43.8 | 1  | K.VTEGLTDVILYHQPD DK.K                                                        |
| *             | HsFlag-VPS71_Ti_1 | 4.2859 | 0.3313 | 2654.91 | 2655.939 | 6821.7  | 1 | 833.5  | 43.5 | 1  | K.VWGNVGTVEWADPIEDPDPEVMAK.V                                                  |
| *             | HsFlag-VPS71_Ti_1 | 4.6721 | 0.3759 | 1474.69 | 1474.651 | 6224.2  | 1 | 1631.3 | 87.5 | 10 | R.NLANTVTEEILEK.A                                                             |
| *             | HsFLAG-p53-DNA-D  | 2.8463 | 0.2839 | 1183.25 | 1183.352 | 8178.9  | 3 | 939.5  | 72.2 | 1  | K.AFSQFGKLER.V                                                                |
| gi 4504733 re |                   | 18     | 52     | 22.50%  | 1257     | 133767  |   |        |      |    | 8.4 insulin receptor substrate 4 [Homo sapiens]                               |
| *             | HsFLAG-ARP6_Ti_1  | 4.8938 | 0.4472 | 2038.16 | 2039.034 | 4073.7  | 1 | 865.7  | 64.7 | 2  | R.SDSESEEDLPVGEEVCK.R                                                         |
| *             | HsFLAG-ARP6_Ti_1  | 2.9469 | 0.2228 | 1982.7  | 1983.145 | 5172.6  | 8 | 363.5  | 50   | 1  | K.LETADAPARLEYENAR.K                                                          |
| *             | HsFLAG-ARP6_Ti_1  | 5.26   | 0.3896 | 2056.53 | 2056.419 | 7968.8  | 1 | 1033.9 | 47.7 | 2  | R.AAAAAAAAAASGAIIPLIPRR.V                                                     |
| *             | HsFLAG-TCF3_Ti_1  | 3.1528 | 0.4038 | 2644.77 | 2645.895 | 7602.3  | 1 | 525.4  | 36.5 | 1  | R.CGTLGAQPDGEPALAAAAAAAAEPPFYK.D                                              |
| *             | HsFLAG-ARP6_Ti_1  | 3.1777 | 0.1439 | 1240.31 | 1240.491 | 6385.4  | 2 | 1115.3 | 83.3 | 2  | K.DVWQVIVKPR.G                                                                |
| *             | HsFLAG-ARP6_Ti_1  | 3.5484 | 0.3692 | 1742.22 | 1742.069 | 7988.3  | 1 | 791.5  | 56.7 | 2  | R.LNTEVASVVVQLLSIR.R                                                          |
| *             | HsFLAG-ARP6_Ti_1  | 4.257  | 0.4259 | 1802.66 | 1803.112 | 5387.4  | 1 | 917    | 65.6 | 1  | R.SYSISGAHLLTLLSAR.R                                                          |
| *             | HsFLAG-ARP6_Ti_1  | 3.5254 | 0.2234 | 1544.66 | 1544.84  | 3967.9  | 2 | 613.1  | 65.4 | 3  | R.HLGLVPLEPGWLR.R                                                             |
| *             | HsFLAG-ARP6_Ti_1  | 3.1682 | 0.2748 | 1327.27 | 1327.483 | 5278.3  | 1 | 645.6  | 72.7 | 4  | R.FVTPSEVAHSR.R                                                               |
| *             | HsFLAG-ARP6_Ti_1  | 3.9748 | 0.3689 | 1588.36 | 1588.762 | 5362.9  | 1 | 998.4  | 79.2 | 4  | K.SWSSYFSLPNPFR.S                                                             |
| *             | HsFLAG-ARP6_Ti_1  | 3.7712 | 0.4471 | 1710.37 | 1709.779 | 5715.9  | 1 | 825.1  | 64.3 | 4  | R.EADSSSDYVNMDFTK.R                                                           |
| *             | HsFLAG-ARP6_Ti_1  | 3.7816 | 0.1866 | 2578.82 | 2580.817 | 11166.7 | 1 | 1286   | 32.6 | 2  | K.RESNTPAPSTQGLPDSWGIIAEPR.Q                                                  |
| *             | HsFLAG-TCF3_Ti_1  | 4.0337 | 0.3298 | 2424.05 | 2424.629 | 5768.7  | 1 | 617.4  | 47.7 | 1  | R.ESNTPAPSTQGLPDSWGIIAEPR.Q                                                   |
| *             | HsFLAG-ARP6_Ti_1  | 4.4056 | 0.4837 | 2376.28 | 2376.616 | 6836.8  | 1 | 1013.4 | 57.9 | 2  | R.IYVVDPFSECCMDISLSPSR.C                                                      |
| *             | HsFLAG-ARP6_Ti_1  | 4.1661 | 0.3578 | 1646.56 | 1645.815 | 4095.4  | 1 | 1117.6 | 78.6 | 1  | R.WFQPVANAADA EAVR.G                                                          |
| *             | HsFLAG-ARP6_Ti_1  | 4.1491 | 0.245  | 2060.97 | 2062.166 | 4137    | 1 | 962.2  | 38.1 | 2  | R.GAQDVAGGSNPGAHNPSANLAR.G                                                    |
| *             | HsFLAG-ARP6_Ti_1  | 5.2227 | 0.4013 | 2061.72 | 2062.166 | 6777.7  | 1 | 1460.6 | 61.9 | 14 | R.GAQDVAGGSNPGAHNPSANLAR.G                                                    |
| *             | HsFLAG-ARP6_Ti_1  | 4.8476 | 0.5153 | 1789.45 | 1789.902 | 8042.3  | 1 | 1484.5 | 60.5 | 4  | R.GDNQAGGAAAAAAAAEPPPR.S                                                      |
| gi 89038911 r |                   | 4      | 30     | 22.50%  | 218      | 24802   |   |        |      |    | 8.9 PREDICTED: similar to ribosomal protein S3a isoform 1 [Homo sapiens]      |
| gi 89038917 r |                   | 4      | 30     | 22.50%  | 218      | 24802   |   |        |      |    | 8.9 PREDICTED: similar to ribosomal protein S3a isoform 7 [Homo sapiens]      |
| gi 89038915 r |                   | 4      | 30     | 22.50%  | 218      | 24802   |   |        |      |    | 8.9 PREDICTED: similar to ribosomal protein S3a isoform 6 [Homo sapiens]      |
| gi 89038913 r |                   | 4      | 30     | 22.50%  | 218      | 24802   |   |        |      |    | 8.9 PREDICTED: similar to ribosomal protein S3a isoform 5 [Homo sapiens]      |
|               | HsFLAG-ARP6_Ti_1  | 2.4371 | 0.2371 | 1002.2  | 1003.141 | 6614.1  | 8 | 656.9  | 75   | 2  | K.LITEDVQGK.N                                                                 |
|               | HsFlag-NUFIP_Ti_1 | 4.526  | 0.2731 | 1579.68 | 1579.737 | 7557    | 1 | 2218.3 | 87.5 | 10 | K.NCLTNFHGMDLTR.D                                                             |
|               | HsFLAG-ARP6_Ti_1  | 4.4478 | 0.4012 | 1705.36 | 1705.92  | 4182.9  | 1 | 949.7  | 76.9 | 16 | K.ACQSIYPLHDV FVR.K                                                           |
|               | HsFLAG-ARP6_Ti_1  | 2.9563 | 0.3967 | 1331.22 | 1332.471 | 5365.6  | 1 | 472.9  | 58.3 | 2  | R.LMELHGE GSSSGK.A                                                            |
| gi 5031877 re |                   | 10     | 19     | 22.40%  | 586      | 66408   |   |        |      |    | 5.2 lamin B1 [Homo sapiens]                                                   |
| *             | HsFLAG-ARP6_Ti_1  | 4.0778 | 0.187  | 1415.47 | 1415.589 | 7362.7  | 1 | 1405.9 | 77.3 | 2  | K.AEHDQ LLLNYAK.K                                                             |



|                |                    |        |        |         |          |         |   |        |      |                                                                                     |
|----------------|--------------------|--------|--------|---------|----------|---------|---|--------|------|-------------------------------------------------------------------------------------|
| *              | HsFLAG-ARP6_Ti_1   | 3.8174 | 0.136  | 1294.55 | 1294.45  | 7215.2  | 1 | 1406.6 | 85   | 1 K.LREYEAALNSK.D                                                                   |
| *              | HsFLAG-ARP6_Ti_1   | 5.6843 | 0.3429 | 2529.82 | 2529.804 | 8234.2  | 1 | 1915.1 | 56.5 | 4 K.SLEGDLEDLKDQIAQLEASLAAK.K                                                       |
| *              | HsFLAG-ARP6_Ti_1   | 4.0677 | 0.2912 | 1429.26 | 1429.613 | 7682.4  | 1 | 2204   | 84.6 | 1 K.DQIAQLEASLAAK.K                                                                 |
| *              | HsFLAG-p53-DNA-D   | 3.3569 | 0.3535 | 1069.06 | 1069.267 | 6225.9  | 1 | 1190.3 | 93.8 | 1 K.LAQALHEMR.E                                                                     |
| *              | HsFLAG-p53-DNA-D   | 4.6649 | 0.3001 | 1652.52 | 1652.844 | 8196.9  | 1 | 1713.3 | 79.2 | 1 R.LYKEELEQTYHAK.L                                                                 |
| *              | HsFLAG-ARP6_Ti_1   | 4.7391 | 0.3935 | 1734.55 | 1735.009 | 8111.6  | 1 | 1857.5 | 75   | 3 R.MRIESLSSQLSNLQK.E                                                               |
| *              | HsFLAG-ARP6_Ti_1   | 4.508  | 0.3365 | 1447.28 | 1447.629 | 10185.3 | 1 | 1909.4 | 79.2 | 1 R.IESLSSQLSNLQK.E                                                                 |
| *              | HsFLAG-p53-DNA-D   | 5.9542 | 0.3442 | 2110.14 | 2109.315 | 8716.9  | 1 | 3021.1 | 81.2 | 3 R.DMQQQQLNDYEQLLDVK.L                                                             |
| *              | HsFLAG-p53-DNA-D   | 4.0376 | 0.1858 | 3415.38 | 3413.587 | 4325.5  | 1 | 489.8  | 26.7 | 2 K.TTIPEEEEEEEEAAGVVVEELFHQQGTPR.A                                                 |
| gij 29789090 r |                    | 7      | 19     | 22.40%  | 522      | 56085   |   |        |      | 8.8 RCC1-like [Homo sapiens]                                                        |
| *              | HsMRGBP-FLAG_Ti_1  | 3.8156 | 0.2148 | 1480.95 | 1480.661 | 6523    | 2 | 963    | 64.3 | 3 K.AGGAAVVITEPEHTK.E                                                               |
| *              | HsFLAG-p53-DNA-D   | 4.7126 | 0.4255 | 1931.92 | 1932.147 | 9236.4  | 1 | 1614.9 | 58.3 | 3 R.TVSGSCAAHSLITTEGK.L                                                             |
| *              | HsFlag-VPS71_Ti_1  | 5.0936 | 0.4645 | 1811.8  | 1812.042 | 8892.7  | 1 | 2062.1 | 68.8 | 4 R.LIEGLSHEVIVSAAACGR.N                                                            |
| *              | HsFLAG-p53-DNA-D   | 3.0652 | 0.2194 | 2300.86 | 2301.4   | 6329.4  | 4 | 272.4  | 35   | 2 K.GNLYSFGCPEYQQLGHNSDGK.F                                                         |
| *              | HsFLAG-p53-DNA-D   | 2.8416 | 0.1225 | 1636.61 | 1635.947 | 5391.7  | 4 | 473.1  | 50   | 2 K.TKDGQILPVPNVVVR.D                                                               |
| *              | HsFLAG-p53-DNA-D   | 3.2246 | 0.3009 | 1884.81 | 1885.053 | 6904.1  | 1 | 679.7  | 53.1 | 1 R.DVACGANHTLVLDSQKR.V                                                             |
| *              | HsFlag-VPS71_Ti_1  | 4.3211 | 0.4074 | 1510.58 | 1510.708 | 8996.7  | 1 | 2030.9 | 79.2 | 4 R.LGHAEQKDEMVPR.L                                                                 |
| gij 4826734 re |                    | 9      | 27     | 22.40%  | 526      | 53426   |   |        |      | 9.4 fusion (involved in t(12;16) in malignant liposarcoma) isoform a [Homo sapiens] |
| *              | HsFLAG-p53-DNA-D   | 6.6134 | 0.344  | 3586.29 | 3587.748 | 7755.9  | 1 | 1595.5 | 33.1 | 13 R.HDSEQDNSDNTIFVQGLGENVTIESVADYFK.Q                                              |
| *              | HsFLAG-p53-DNA-D   | 3.9878 | 0.3135 | 1537.23 | 1537.774 | 4844.8  | 1 | 892    | 79.2 | 1 K.KTGQPMINLYTDR.E                                                                 |
| *              | HsFLAG-p53-DNA-D   | 3.5914 | 0.2673 | 1952.5  | 1953.221 | 6692.3  | 1 | 930.5  | 62.5 | 2 K.KTGQPMINLYTDRETGK.L                                                             |
| *              | HsFlag-VPS71_Ti_1  | 4.1712 | 0.4305 | 1421.9  | 1421.503 | 4776.8  | 1 | 1058.8 | 76.9 | 3 K.GEATVSFDDPPSAK.A                                                                |
| *              | HsFlag-VPS71_Ti_1  | 2.5337 | 0.1023 | 1022.72 | 1023.133 | 6069    | 2 | 567.1  | 68.8 | 1 K.AAIDWFDGK.E                                                                     |
| *              | HsFlag-VPS71_Ti_1  | 2.0633 | 0.208  | 891.59  | 891.999  | 3281.8  | 1 | 288.9  | 78.6 | 2 K.EFSGNPIK.V                                                                      |
| *              | HsFlag-VPS71_Ti_1  | 4.1462 | 0.3835 | 1814.79 | 1813.914 | 5646.5  | 1 | 907.4  | 73.1 | 2 K.CPNPTCENMNFSWR.N                                                                |
| *              | HsFLAG-p53-DNA-D   | 4.1091 | 0.4325 | 2253.84 | 2254.355 | 7114.1  | 1 | 941.5  | 52.2 | 2 K.APKPDGPGGGPGGSHMGGNYGDDR.R                                                      |
| *              | HsFlag-NUFIP_Ti_2  | 4.0827 | 0.3326 | 2254.04 | 2254.355 | 6174    | 1 | 782.1  | 33.7 | 1 K.APKPDGPGGGPGGSHMGGNYGDDR.R                                                      |
| gij 56676335 r |                    | 34     | 111    | 22.30%  | 2472     | 274464  |   |        |      | 5.5 RAP1 interacting factor 1 [Homo sapiens]                                        |
| *              | HsFLAG-UTX1_Ti_2   | 3.8311 | 0.3246 | 3327.11 | 3327.629 | 4441.2  | 1 | 355.6  | 25.8 | 1 R.QQSPLAPLLETLEDPSASHGGQTDAYLTLTSR.M                                              |
| *              | HsFlag-DPCD_Ti_20  | 3.6129 | 0.2922 | 1720.66 | 1718.942 | 6807.9  | 1 | 699    | 56.7 | 3 K.ITSELSEANALELLSK.L                                                              |
| *              | HsFlag-DPCD_Ti_20  | 3.7101 | 0.3024 | 1686.11 | 1684.948 | 4898.5  | 1 | 1135.7 | 78.6 | 1 R.LIEQAPIQMGEAAVR.W                                                               |
| *              | HsFlag-DPCD_Ti_20  | 3.6096 | 0.2996 | 1304.07 | 1304.619 | 4916.4  | 1 | 810.4  | 77.3 | 11 K.LVIPLVVHSAQK.V                                                                 |
| *              | HsARP6-FLAG_Ti_1   | 5.2159 | 0.3509 | 1909.98 | 1911.165 | 8975.5  | 1 | 2388.4 | 75   | 16 R.SGSFINSLLQLEELGFR.S                                                            |
| *              | HsFLAG-p53-DNA-D   | 4.82   | 0.2544 | 1892.14 | 1892.125 | 7056.8  | 1 | 1144.1 | 62.5 | 1 K.SLIDNFALNPDIILCSAK.R                                                            |
| *              | HsFLAG-UTX1_Ti_2   | 4.7101 | 0.4232 | 2340.49 | 2341.753 | 5395.8  | 1 | 773.8  | 52.5 | 11 K.LVLSLEPLEHPLISSPSFFSK.H                                                        |
| *              | HsFLAG-Lin9_Ti_20  | 3.7618 | 0.3366 | 2341.48 | 2341.753 | 5171    | 1 | 667.1  | 35   | 2 K.LVLSLEPLEHPLISSPSFFSK.H                                                         |
| *              | HsARP6-FLAG_Ti_1   | 3.9055 | 0.3421 | 1880    | 1881.142 | 8356.5  | 1 | 1240.7 | 58.8 | 2 K.HANTLITAVHDSFVAVGK.D                                                            |
| *              | HsFlag-NUFIP_Ti_2  | 2.6425 | 0.1709 | 1187.95 | 1188.285 | 5057.9  | 1 | 670.6  | 77.8 | 1 K.SPQRPSDWSK.K                                                                    |
| *              | HsFlag-NUFIP_Ti_2  | 3.4105 | 0.1497 | 1984.54 | 1985.334 | 10716.9 | 2 | 816.2  | 46.9 | 1 K.IFATLTRPLALFYENSK.L                                                             |
| *              | HsYL1_Ti_101.1334. | 2.8305 | 0.2658 | 1412.23 | 1411.431 | 5897.2  | 1 | 701    | 66.7 | 1 K.SSLSNNECGSLDK.T                                                                 |
| *              | HsFlag-DPCD_Ti_20  | 5.2795 | 0.3773 | 2593.6  | 2594.841 | 9004.8  | 1 | 1217.7 | 33.7 | 4 K.FDGSENRFSPSPLNISSTVTVK.N                                                        |
| *              | HsFlag-NUFIP_Ti_2  | 3.7816 | 0.269  | 1362.5  | 1362.612 | 5802.3  | 1 | 967.1  | 72.7 | 7 K.SPLHIKDDVLPK.Q                                                                  |
| *              | HsFlag-DPCD_Ti_20  | 4.3175 | 0.3206 | 1643.05 | 1642.89  | 9166    | 1 | 1737.4 | 73.1 | 4 K.LIAEQTLQENLIEK.G                                                                |

|                |                    |        |        |         |          |         |   |        |      |                                                                                                    |
|----------------|--------------------|--------|--------|---------|----------|---------|---|--------|------|----------------------------------------------------------------------------------------------------|
| *              | HsFlag-VPS71_Ti_10 | 4.8699 | 0.4866 | 1593.8  | 1593.645 | 8089.9  | 1 | 1500.1 | 71.4 | 4 K.TLGETSANAETEQNK.K                                                                              |
| *              | HsFLAG-ARP5_Ti_1   | 3.6882 | 0.4011 | 2590.62 | 2591.745 | 5478    | 1 | 405    | 28.3 | 1 K.KADPENIKSEGDGTQDIVDKSSEK.L                                                                     |
| *              | HsYL1_Ti_101.1312. | 2.8869 | 0.293  | 1263.98 | 1264.288 | 4577.1  | 1 | 837.4  | 81.8 | 2 K.SEGDGTQDIVDK.S                                                                                 |
| *              | HsYL1_Ti_101.1427. | 3.5563 | 0.2429 | 1521.02 | 1521.535 | 4469.5  | 1 | 860.6  | 75   | 2 K.SNESVDIQDQEEK.V                                                                                |
| *              | HsH2AZ-FLAG_293_   | 3.0364 | 0.2943 | 1973.51 | 1974.177 | 4061.3  | 1 | 261.7  | 43.8 | 4 K.YAEYSFTSLPVPESNLR.T                                                                            |
| *              | HsFLAG-ARP6_Ti_2   | 3.1089 | 0.2394 | 1248.7  | 1249.404 | 5463.4  | 1 | 964    | 77.3 | 1 K.IGISDISSLSEK.T                                                                                 |
| *              | HsFLAG-FLJ20309_   | 2.8869 | 0.1873 | 1292.31 | 1292.4   | 7969.8  | 2 | 848.2  | 72.2 | 1 K.TFQTLCEQHK.R                                                                                   |
| *              | HsFlag-VPS71_Ti_10 | 2.6217 | 0.1788 | 1495.83 | 1493.524 | 7718.8  | 2 | 612.8  | 62.5 | 2 K.NTENNDVEISETK.K                                                                                |
| *              | HsTIP60_Ti_102.195 | 3.3616 | 0.3929 | 1793.48 | 1793.879 | 7203.4  | 1 | 718    | 56.7 | 3 K.EDNDTINDSLIVSETK.S                                                                             |
| *              | HsFlag-DPCD_Ti_20  | 4.1796 | 0.3249 | 1391.12 | 1391.475 | 7718.2  | 1 | 1788.6 | 83.3 | 2 K.TGISEEAAIEENK.R                                                                                |
| *              | HsFLAG-Lin9_Ti_20  | 3.5345 | 0.3245 | 2296.11 | 2297.434 | 9330.1  | 1 | 687.6  | 45   | 2 K.EVATEEFNSDISLSDNTTPVK.L                                                                        |
| *              | HsFlag-DPCD_Ti_20  | 4.6817 | 0.3637 | 3561.16 | 3562.65  | 9548.4  | 1 | 1026.6 | 24.2 | 1 K.LNAQTEISEQTAAGELDGGNDVSDLHSSEETNTK.M                                                           |
| *              | HsARP6-FLAG_Ti_1   | 3.4665 | 0.1571 | 1647.31 | 1646.89  | 5981    | 1 | 1109.4 | 64.3 | 2 R.CVWSPLASPSTSILK.R                                                                              |
| *              | HsFlag-VPS71_Ti_10 | 3.5779 | 0.2328 | 1490.4  | 1489.582 | 7995.8  | 3 | 933.5  | 66.7 | 1 K.RSQEDEISSPVNK.V                                                                                |
| *              | HsH2AZ-FLAG_293_   | 4.6681 | 0.4029 | 1967.43 | 1967.142 | 5936.3  | 1 | 1865   | 73.5 | 5 R.VSFADPIYQAGLADDIDR.R                                                                           |
| *              | HsTIP60_Ti_106.348 | 4.3021 | 0.3097 | 3967.55 | 3969.517 | 6445.8  | 1 | 396.6  | 20.6 | 1 K.ESIPCPTESVYPLVNCVAPVDIILPQITSNMWAR.G                                                           |
| *              | HsARP6-FLAG_Ti_1   | 3.9062 | 0.3869 | 1449.22 | 1449.641 | 6360.3  | 1 | 1155.9 | 73.1 | 3 K.TIGDLSTLTASEIK.T                                                                               |
| *              | HsFLAG-ARP6_Ti_2   | 2.944  | 0.1703 | 1477.18 | 1476.667 | 2733.7  | 3 | 397.5  | 66.7 | 2 R.GLEEIPVFDISEK.T                                                                                |
| *              | HsH2AZ-FLAG_293_   | 5.8854 | 0.4286 | 1823.36 | 1823.18  | 5868.6  | 1 | 1697.7 | 75   | 6 R.LVSDIIDPVALEIPLSK.N                                                                            |
| gij 40254861 r |                    | 15     | 72     | 22.30%  | 1087     | 114543  |   |        |      | 7.1 ubiquitin associated protein 2-like [Homo sapiens]                                             |
| *              | HsFLAG-ARP6_Ti_1   | 3.174  | 0.2116 | 1837.3  | 1837.906 | 3911    | 2 | 292    | 53.6 | 2 R.GNWEQPQNQNQTQHK.Q                                                                              |
| *              | HsFLAG-ARP6_Ti_1   | 2.8249 | 0.1416 | 1298.05 | 1298.445 | 4624.4  | 2 | 482    | 70   | 1 K.QRPQATAEQIR.L                                                                                  |
| *              | HsFLAG-ARP6_Ti_1   | 5.5412 | 0.4255 | 2210.32 | 2211.497 | 5372.2  | 1 | 1277.1 | 63.2 | 5 R.AINVLLGNPDTHSWEMVGK.K                                                                          |
| *              | HsYL1_Ti_101.2372. | 4.3068 | 0.4272 | 2242.94 | 2242.271 | 4970.4  | 1 | 732.2  | 58.3 | 10 R.TATEEWGTEDWNEDLSETK.I                                                                         |
| *              | HsFLAG-ARP6_Ti_1   | 4.7121 | 0.3581 | 2473.14 | 2473.789 | 4168.9  | 1 | 412.5  | 43.5 | 2 K.IFTASNVSVPPLAENVITAGQR.I                                                                       |
| *              | HsARP6-FLAG_Ti_1   | 3.0649 | 0.2397 | 1487.15 | 1487.609 | 7445.7  | 1 | 761.5  | 57.7 | 2 K.GGSTTGSQFLEQFK.T                                                                               |
| *              | HsFLAG-ARP6_Ti_1   | 4.5521 | 0.3908 | 1387.44 | 1387.492 | 9341.6  | 1 | 2006.5 | 83.3 | 7 K.NPSDSAVHSPFTK.R                                                                                |
| *              | HsFLAG-ARP6_Ti_1   | 4.5013 | 0.371  | 2131.22 | 2131.469 | 8963.8  | 1 | 1556.5 | 64.7 | 3 K.RQAFTPSSTMMEVFLQEK.S                                                                           |
| *              | HsFLAG-ARP6_Ti_1   | 4.2069 | 0.4339 | 1974.67 | 1975.282 | 5627.1  | 1 | 544.4  | 53.1 | 2 R.QAFTPSSTMMEVFLQEK.S                                                                            |
| *              | HsFLAG-ARP6_Ti_1   | 4.4813 | 0.3983 | 1961.62 | 1961.222 | 3238.4  | 1 | 654.1  | 65   | 16 K.SPAVATSTAAPPPSSPLPSK.S                                                                        |
| *              | HsFLAG-ARP6_Ti_1   | 3.9135 | 0.2078 | 1337.15 | 1337.475 | 5847.3  | 1 | 886.2  | 77.3 | 4 R.RYPSSISSPQK.D                                                                                  |
| *              | HsFLAG-ARP6_Ti_1   | 4.8601 | 0.361  | 2597.05 | 2597.798 | 9003.5  | 1 | 1562.4 | 48   | 2 K.NGFSSVQATQLQTTQSVEGATGSAVK.S                                                                   |
| *              | HsYL1_Ti_103.3086. | 3.9362 | 0.3678 | 2283.99 | 2284.616 | 2737.6  | 1 | 315    | 50   | 8 R.FPLDYYSIFPPTPTPLTGR.D                                                                          |
| *              | HsYL1_Ti_101.1939. | 3.9772 | 0.3521 | 1527.62 | 1525.612 | 4257.8  | 3 | 734.5  | 67.9 | 5 R.DGSLASNYPYSGDLTK.F                                                                             |
| *              | HsFLAG-FLJ20309_   | 3.1694 | 0.2549 | 1544.64 | 1544.705 | 4032.3  | 1 | 389.8  | 61.5 | 3 R.SQTSSIPQKPQTNK.S                                                                               |
| gij 32189394 r |                    | 6      | 11     | 22.30%  | 529      | 56560   |   |        |      | 5.4 ATP synthase, H+ transporting, mitochondrial F1 complex, beta subunit precursor [Homo sapiens] |
| *              | HsFLAG-ARP6_Ti_1   | 3.6994 | 0.4105 | 1651.59 | 1651.903 | 8318.4  | 1 | 1133.9 | 64.3 | 4 R.LVLEVAQHLGESTVR.T                                                                              |
| *              | HsFLAG-ARP6_Ti_1   | 3.539  | 0.2492 | 1457.87 | 1458.8   | 10428.5 | 2 | 1281.2 | 66.7 | 1 K.TVLIMELINNVAK.A                                                                                |
| *              | HsFLAG-TCF3_Ti_10  | 5.09   | 0.4724 | 1923.6  | 1923.133 | 7762.3  | 1 | 1746   | 73.3 | 2 R.DQEQDVLFLFIDNIFR.F                                                                             |
| *              | HsFLAG-p53-DNA-D   | 4.9228 | 0.3061 | 3846    | 3845.298 | 10886.3 | 1 | 828.6  | 22.9 | 1 K.KGSITSVQAIYVPADDLTDPAPATTFHAHLDTTVLSR.A                                                        |
| *              | HsFLAG-TCF3_Ti_10  | 4.327  | 0.2819 | 1988.58 | 1989.233 | 4316.6  | 1 | 559.1  | 50   | 2 R.AIAELGIYPAVDPLDSTSR.I                                                                          |
| *              | HsFLAG-ARP6_Ti_1   | 3.1146 | 0.2579 | 2023.85 | 2024.345 | 7154.6  | 1 | 539.5  | 47.1 | 1 R.FLSQPFQVAEVFTGHMGK.L                                                                           |
| gij 4507231 re |                    | 2      | 4      | 22.30%  | 148      | 17260   |   |        |      | 9.6 single-stranded DNA binding protein 1 [Homo sapiens]                                           |

|               |                    |        |        |         |          |                                                                      |   |        |      |    |                                       |
|---------------|--------------------|--------|--------|---------|----------|----------------------------------------------------------------------|---|--------|------|----|---------------------------------------|
| *             | HsFLAG-ARP6_Ti_1   | 2.5296 | 0.3072 | 1780.39 | 1780.051 | 7215                                                                 | 3 | 552.9  | 53.6 | 1  | K.NPVTIFSLATNEMWR.S                   |
| *             | HsFLAG-ARP6_Ti_1   | 4.1756 | 0.3894 | 1993    | 1993.265 | 7305.3                                                               | 1 | 900.1  | 55.9 | 3  | R.QATTIADNIIFLSDQTK.E                 |
| gi 7705425 re | 1                  | 5      | 22.30% | 130     | 14502    | 9.8 mitochondrial ribosomal protein S17 [Homo sapiens]               |   |        |      |    |                                       |
| *             | HsFlag-NUFIP_Ti_1C | 6.4883 | 0.3867 | 3083.24 | 3081.41  | 7932.6                                                               | 1 | 1301.6 | 31.2 | 5  | K.VIDPVTGKPCAGTTYLESPLSSETTQLSK.N     |
| gi 5031863 re | 9                  | 40     | 22.20% | 585     | 65331    | 5.3 galectin 3 binding protein [Homo sapiens]                        |   |        |      |    |                                       |
| *             | HsFLAG-ARP6_Ti_1   | 6.0169 | 0.4795 | 2453.77 | 2453.603 | 8087.8                                                               | 1 | 2121.4 | 62.5 | 7  | R.GQWGTVCNDLWDLTASVVC.R.A             |
| *             | HsFLAG-ARP6_Ti_1   | 4.768  | 0.3465 | 1593.35 | 1593.734 | 6836.1                                                               | 1 | 1449.8 | 76.9 | 2  | R.ELSEALGQIFDSQR.G                    |
| *             | HsFLAG-ARP6_Ti_1   | 3.4387 | 0.2773 | 1132.28 | 1132.346 | 6753.5                                                               | 1 | 1366.1 | 88.9 | 2  | R.RIDITLSSVK.C                        |
| *             | HsFLAG-ARP6_Ti_1   | 3.5542 | 0.3404 | 1327.4  | 1327.434 | 6589.8                                                               | 1 | 1282.1 | 81.8 | 2  | R.ASHEEVEGLVEK.I                      |
| *             | HsFLAG-ARP6_Ti_1   | 5.2755 | 0.3369 | 1985.21 | 1985.337 | 6381.5                                                               | 1 | 1188   | 62.5 | 17 | K.TLQALEFHTVPFQLLAR.Y                 |
| *             | HsFLAG-ARP6_Ti_1   | 4.8758 | 0.286  | 1985.74 | 1985.337 | 5096.9                                                               | 1 | 1154.5 | 50   | 3  | K.TLQALEFHTVPFQLLAR.Y                 |
| *             | HsSrcap_Ti_204.280 | 3.1459 | 0.2445 | 2522.96 | 2522.778 | 8177.6                                                               | 1 | 364.7  | 36.8 | 1  | R.YYPYQSFQTPQHPSFLFQDK.R              |
| *             | HsFLAG-ARP6_Ti_1   | 3.6634 | 0.4312 | 2301.76 | 2302.613 | 9169.5                                                               | 1 | 1393.5 | 55.3 | 1  | K.ALMLCEGLFVADVTDFFEGWK.A             |
| *             | HsFLAG-ARP6_Ti_1   | 3.0025 | 0.3887 | 1769.21 | 1769.88  | 4055                                                                 | 1 | 542.8  | 60   | 5  | K.STSSFPCPAGHFNGFR.T                  |
| gi 51492636 r | 15                 | 82     | 22.10% | 1085    | 124025   | 8.6 PREDICTED: U2-associated SR140 protein [Homo sapiens]            |   |        |      |    |                                       |
| gi 88971174 r | 15                 | 82     | 22.10% | 1085    | 124025   | 8.6 PREDICTED: similar to U2-associated SR140 protein [Homo sapiens] |   |        |      |    |                                       |
|               | HsFLAG-Lin9_Ti_20  | 4.0055 | 0.3022 | 2238.84 | 2238.428 | 10251.6                                                              | 1 | 910.9  | 47.2 | 4  | R.ESLCDSPHQNLSRPLENK.L                |
|               | HsFLAG-FLJ20729_   | 4.3735 | 0.3939 | 2132.96 | 2133.276 | 9471.8                                                               | 1 | 1765.7 | 57.9 | 5  | K.AAAEIYEEFLAAFEGSDGNK.V              |
|               | HsFlag-VPS71_Ti_1C | 4.1013 | 0.4352 | 1713.68 | 1713.798 | 8987.2                                                               | 1 | 1203.3 | 60   | 4  | R.GGVVNAAKEEHETDEK.R                  |
|               | HsFLAG-Lin9_Ti_20  | 3.9826 | 0.2027 | 2220.63 | 2221.475 | 9177.7                                                               | 1 | 859.2  | 50   | 4  | K.NPPNQSSNERPPSLLVIETK.K              |
|               | HsFLAG-Lin9_Ti_20  | 2.9917 | 0.1366 | 1350.56 | 1350.555 | 12274.3                                                              | 6 | 999    | 70   | 1  | K.SNLELFKEELK.Q                       |
|               | HsFlag-NUFIP_Ti_11 | 3.0478 | 0.134  | 950.49  | 950.172  | 5702                                                                 | 6 | 1117.3 | 92.9 | 6  | R.NLLALIHR.M                          |
|               | HsFlag-NUFIP_Ti_1C | 4.8325 | 0.4681 | 1785.8  | 1785.999 | 5429.2                                                               | 1 | 969.5  | 73.1 | 16 | R.FLFENQTPAHVYYR.W                    |
|               | HsFlag-VPS71_Ti_1C | 5.9202 | 0.4005 | 3686.32 | 3685.067 | 8671.4                                                               | 1 | 1148.1 | 26.6 | 3  | R.KNDIGDAMVFCLNNAEAAEEIVDCITESLSILK.T |
|               | HsFLAG-Lin9_Ti_20  | 4.7387 | 0.4325 | 1571.53 | 1572.798 | 6700.1                                                               | 1 | 1544.4 | 76.9 | 4  | R.LYLVSDVLYNSSAK.V                    |
|               | HsFLAG-Lin9_Ti_20  | 4.6977 | 0.3946 | 1600.22 | 1601.766 | 8022.7                                                               | 1 | 1809.6 | 83.3 | 3  | K.LCQIFSDLNATYR.T                     |
|               | HsFLAG-Lin9_Ti_20  | 4.1032 | 0.261  | 1402.42 | 1402.55  | 7544.8                                                               | 1 | 1394.8 | 77.3 | 12 | R.TIQGHLQSENFK.Q                      |
|               | HsFLAG-p53-DNA-D   | 3.1841 | 0.2465 | 1878.69 | 1879.165 | 6164                                                                 | 1 | 731.7  | 60.7 | 2  | R.AWEDWAIYPEPFLIK.L                   |
|               | HsFLAG-Lin9_Ti_20  | 4.7698 | 0.3392 | 1744.37 | 1744.084 | 5878.6                                                               | 1 | 1216.1 | 71.4 | 12 | K.LQNIFLGLVNIIEK.E                    |
|               | HsFlag-DPCD_Ti_20  | 3.9656 | 0.4299 | 1905.86 | 1905.964 | 3426.9                                                               | 1 | 290.3  | 50   | 5  | K.SLDDDLGVPDATEDSK.K                  |
|               | HsFLAG-ARP5_Ti_1   | 3.3951 | 0.1256 | 1434.29 | 1434.592 | 10093.8                                                              | 1 | 1270.7 | 72.7 | 1  | K.FQDELESGKRPK.K                      |
| gi 32483374 r | 11                 | 47     | 22.10% | 594     | 66050    | 9.2 nucleolar protein 5A [Homo sapiens]                              |   |        |      |    |                                       |
| *             | HsH2AZ-FLAG_293_   | 3.7142 | 0.2401 | 2354.5  | 2354.66  | 4291                                                                 | 1 | 418.9  | 47.5 | 1  | K.EVEEISLLQPQVEESVLNLGK.F             |
| *             | HsFLAG-p53-DNA-D   | 3.6075 | 0.2499 | 1151.47 | 1151.392 | 7616.8                                                               | 1 | 1474.2 | 88.9 | 3  | R.LLLETHLPSK.K                        |
| *             | HsFLAG-Lin9_Ti_20  | 3.2553 | 0.2803 | 1189.16 | 1189.316 | 7331                                                                 | 1 | 1269.1 | 85   | 3  | K.AQLGLGHSYSR.A                       |
| *             | HsFLAG-p53-DNA-D   | 5.595  | 0.4394 | 1859.64 | 1858.163 | 5249.6                                                               | 1 | 1020.9 | 63.9 | 9  | K.MSQVAPSL SALIGEAVGAR.L              |
| *             | HsFLAG-Lin9_Ti_20  | 3.8246 | 0.388  | 1308.56 | 1309.552 | 5909.6                                                               | 1 | 987.2  | 75   | 3  | R.LIAHAGSLTNLAK.Y                     |
| *             | HsFlag-NUFIP_Ti_11 | 3.9592 | 0.3684 | 1309.48 | 1309.552 | 5722.1                                                               | 1 | 1583   | 87.5 | 12 | R.LIAHAGSLTNLAK.Y                     |
| *             | HsFLAG-Lin9_Ti_20  | 4.0049 | 0.3378 | 1376.98 | 1377.58  | 8805.2                                                               | 1 | 2385.4 | 87.5 | 3  | K.YPASTVQILGAEK.A                     |
| *             | HsH2AZ-FLAG_293_   | 3.7181 | 0.245  | 1716.26 | 1715.863 | 3033.6                                                               | 1 | 703.3  | 75   | 6  | R.IDCFSEVPTSVFGEK.L                   |
| *             | HsFLAG-Lin9_Ti_20  | 3.6252 | 0.2928 | 1313.87 | 1312.465 | 10881.9                                                              | 1 | 1697.3 | 80   | 1  | R.LSFYETGEIPR.K                       |
| *             | HsFLAG-p53-DNA-D   | 5.1113 | 0.4174 | 1905.7  | 1906.1   | 5885.3                                                               | 1 | 1007.6 | 64.7 | 2  | R.KFSKEEPVSSGPEEAVGK.S                |
| *             | HsFLAG-ARP6_Ti_1   | 4.7179 | 0.5277 | 1777.22 | 1777.926 | 4674                                                                 | 1 | 1081.6 | 71.9 | 4  | K.FSKEEPVSSGPEEAVGK.S                 |

|                      |        |        |         |          |         |                                                                       |        |      |   |                                 |
|----------------------|--------|--------|---------|----------|---------|-----------------------------------------------------------------------|--------|------|---|---------------------------------|
| gi 4506621 re        | 3      | 5      | 22.10%  | 145      | 17258   | 10.6 ribosomal protein L26 [Homo sapiens]                             |        |      |   |                                 |
| HsFlag-NUFIP_Ti_10   | 2.7663 | 0.2103 | 1082.53 | 1083.189 | 4620.4  | 7                                                                     | 658.6  | 87.5 | 1 | K.FNPFVTSR.S                    |
| HsFlag-NUFIP_Ti_11   | 2.6981 | 0.1226 | 1079.25 | 1079.206 | 4593.7  | 1                                                                     | 882.4  | 81.2 | 2 | R.HFNAPSHIR.R                   |
| HsFlag-NUFIP_Ti_11   | 4.0513 | 0.2987 | 1418.38 | 1418.596 | 7793.3  | 1                                                                     | 787.4  | 57.7 | 2 | K.ANGTTVHVGIHPSK.V              |
| gi 31543164 r        | 5      | 15     | 22.00%  | 341      | 37535   | 7.4 WD repeat domain 58 [Homo sapiens]                                |        |      |   |                                 |
| * HsARP6-FLAG_Ti_1   | 4.0326 | 0.1975 | 2038.48 | 2038.398 | 8477    | 1                                                                     | 1604.4 | 44.4 | 2 | R.AVPLAVPLGQTEVFQALQR.L         |
| * HsFLAG-ARP6_Ti_1   | 4.3836 | 0.3229 | 2038.89 | 2038.398 | 4377.5  | 1                                                                     | 1201.5 | 72.2 | 9 | R.AVPLAVPLGQTEVFQALQR.L         |
| * HsARP6-FLAG_Ti_1   | 3.6178 | 0.2825 | 3035.48 | 3034.35  | 7331    | 1                                                                     | 726.8  | 26.8 | 1 | K.FLAAGNNGQIAIFLSSALSSEAKEESK.K |
| * HsFLAG-Lin9_Ti_20  | 2.7878 | 0.2185 | 1126.26 | 1126.255 | 5746.2  | 2                                                                     | 675.8  | 70   | 1 | R.HLLSAGDGEVK.A                 |
| * HsFLAG-p53-DNA-D   | 3.1747 | 0.2657 | 1736.97 | 1737.09  | 4282.9  | 7                                                                     | 389.2  | 53.3 | 2 | R.TSLEVPEINALLLVPK.E            |
| gi 21361657 r        | 7      | 14     | 21.80%  | 505      | 56782   | 6.4 protein disulfide isomerase-associated 3 precursor [Homo sapiens] |        |      |   |                                 |
| * HsFlag-VPS71_Ti_10 | 4.087  | 0.4509 | 1348.83 | 1348.502 | 9054.2  | 1                                                                     | 1432.9 | 72.7 | 3 | K.RLAPEYEAATR.L                 |
| * HsFLAG-p53-DNA-D   | 4.6298 | 0.4737 | 2350.7  | 2349.515 | 8396.5  | 1                                                                     | 993.5  | 50   | 2 | K.DASIVGFFDSSFSEAHSEFLK.A       |
| * HsFlag-VPS71_Ti_10 | 5.7073 | 0.4393 | 2577.91 | 2576.866 | 9004.6  | 1                                                                     | 1662   | 52.2 | 1 | K.TFSHELSDFGLESTAGEIPVVAIR.T    |
| * HsFLAG-Lin9_Ti_20  | 3.8879 | 0.2372 | 1834.86 | 1833.993 | 9326.8  | 1                                                                     | 1228   | 60   | 1 | K.VVVAENFDEIVNENK.D             |
| * HsFLAG-p53-DNA-D   | 3.3929 | 0.253  | 1342.39 | 1342.537 | 4877    | 1                                                                     | 868.8  | 72.7 | 2 | R.GFPTIYFSPANK.K                |
| * HsFlag-VPS71_Ti_10 | 3.8715 | 0.3411 | 1372.55 | 1371.533 | 5559.1  | 1                                                                     | 1096.1 | 85   | 4 | R.ELSDFISYLQR.E                 |
| * HsFlag-VPS71_Ti_10 | 2.9907 | 0.1341 | 1580.51 | 1580.778 | 4690.2  | 1                                                                     | 519.9  | 65.4 | 1 | R.EATNPPVIQEEKPK.K              |
| gi 13128860 r        | 8      | 16     | 21.80%  | 482      | 55103   | 5.5 histone deacetylase 1 [Homo sapiens]                              |        |      |   |                                 |
| HsFLAG-p53-DNA-D     | 4.2556 | 0.3406 | 1608.84 | 1608.899 | 9133.6  | 1                                                                     | 1844.7 | 79.2 | 3 | R.MTHNLLNYGLYR.K                |
| HsH2AZ-FLAG_293_     | 3.9749 | 0.1887 | 1428.75 | 1427.572 | 6906    | 1                                                                     | 1117.8 | 72.7 | 3 | R.SIRPDNMSEYSK.Q                |
| * HsFLAG-Lin9_Ti_20  | 4.3572 | 0.341  | 2482.73 | 2483.874 | 10169.2 | 1                                                                     | 1233.8 | 47.6 | 1 | K.KSEASGFCYVNDIVLAILLELLK.Y     |
| * HsFLAG-Lin9_Ti_20  | 4.4237 | 0.4228 | 2355.85 | 2355.7   | 8361.2  | 1                                                                     | 1264.5 | 55   | 2 | K.SEASGFCYVNDIVLAILLELLK.Y      |
| HsARP6-FLAG_Ti_1     | 2.7103 | 0.2598 | 1375.1  | 1375.48  | 4614.8  | 1                                                                     | 500.1  | 68.2 | 1 | K.YGEYFPGTGLR.D                 |
| * HsFlag-VPS71_Ti_10 | 2.9281 | 0.3941 | 2045.38 | 2045.268 | 11005.9 | 1                                                                     | 984.5  | 52.9 | 2 | R.DGIDDESIEAIFKPVMSK.V          |
| * HsFlag-VPS71_Ti_10 | 5.8983 | 0.1142 | 2233.19 | 2234.445 | 5847.4  | 1                                                                     | 1862.4 | 75   | 3 | K.LHISPSNMTNQNTNEYLEK.I         |
| * HsH2AZ-FLAG_293_   | 3.0063 | 0.2607 | 1067.57 | 1066.166 | 5546.8  | 1                                                                     | 788.1  | 87.5 | 1 | K.RISICSSDK.R                   |
| gi 4506185 re        | 3      | 6      | 21.80%  | 261      | 29484   | 7.7 proteasome alpha 4 subunit [Homo sapiens]                         |        |      |   |                                 |
| * HsFlag-VPS71_Ti_10 | 3.4955 | 0.3535 | 2593.9  | 2594.819 | 7347.5  | 1                                                                     | 534    | 39.1 | 2 | K.LNEDMACSVAGITSDANVLTNELR.L    |
| * HsFLAG-FLJ20729_   | 3.5064 | 0.3351 | 1650.71 | 1651.949 | 6887.1  | 1                                                                     | 537.3  | 53.8 | 2 | K.RPFGVSLLYIGWDK.H              |
| * HsFlag-FLJ90652_2  | 3.4955 | 0.3173 | 2206.55 | 2205.35  | 5890.5  | 1                                                                     | 746.3  | 61.1 | 2 | K.HYGFQLYQSDPSGNYGGWK.A         |
| gi 55770864 r        | 4      | 15     | 21.80%  | 257      | 26888   | 11.2 THO complex 4 [Homo sapiens]                                     |        |      |   |                                 |
| * HsFlag-VPS71_Ti_10 | 5.287  | 0.4102 | 2843.16 | 2843.203 | 5484.8  | 1                                                                     | 993.6  | 48   | 7 | K.LLVSNDLDFGVSDADIQELFAEFGTLK.K |
| * HsFLAG-p53-DNA-D   | 3.6885 | 0.2149 | 2970.86 | 2971.377 | 5995.5  | 1                                                                     | 672.4  | 26.9 | 2 | K.LLVSNDLDFGVSDADIQELFAEFGTLK.K |
| * HsFLAG-Lin9_Ti_20  | 3.6094 | 0.3232 | 1232.08 | 1232.338 | 7744    | 1                                                                     | 1356.4 | 85   | 1 | R.SLGTADVHFER.K                 |
| * HsFLAG-p53-DNA-D   | 4.9006 | 0.4163 | 2035.75 | 2036.163 | 9307.1  | 1                                                                     | 1224.2 | 58.8 | 5 | K.QQLSAEELDAQLDAYNAR.M          |
| gi 29570791 r        | 7      | 18     | 21.70%  | 391      | 45144   | 7.7 casein kinase II alpha 1 subunit isoform a [Homo sapiens]         |        |      |   |                                 |
| gi 4503095 re        | 7      | 18     | 21.70%  | 391      | 45144   | 7.7 casein kinase II alpha 1 subunit isoform a [Homo sapiens]         |        |      |   |                                 |
| HsFlag-FLJ90652_2    | 2.9355 | 0.2391 | 1310.88 | 1311.564 | 5798.8  | 1                                                                     | 663.8  | 62.5 | 1 | R.GGPNITLADIVK.D                |
| HsFLAG-p53-DNA-D     | 5.275  | 0.4383 | 1865.6  | 1866.168 | 7781.5  | 1                                                                     | 1539.1 | 61.8 | 3 | R.GGPNITLADIVKDPVSR.T           |
| HsFLAG-p53-DNA-D     | 5.2552 | 0.3252 | 1732.51 | 1732.933 | 8768.9  | 1                                                                     | 2475.4 | 82.1 | 4 | R.TPALVFEHVNNTDFK.Q             |
| HsFlag-FLJ90652_2    | 4.1255 | 0.424  | 2307.93 | 2308.558 | 6527.1  | 1                                                                     | 790.2  | 55.6 | 4 | R.LIDWGLAEFYHPGQEYNVR.V         |
| HsFlag-FLJ90652_2    | 4.3431 | 0.4082 | 1543.69 | 1544.698 | 5678.7  | 1                                                                     | 1220.4 | 79.2 | 2 | K.VLGTEDLYDYIDK.Y               |

|               |                     |        |        |         |          |         |   |        |      |     |                                                                                                               |
|---------------|---------------------|--------|--------|---------|----------|---------|---|--------|------|-----|---------------------------------------------------------------------------------------------------------------|
|               | HsFlag-FLJ90652_2C  | 5.0431 | 0.4646 | 2325.43 | 2326.571 | 9077.7  | 1 | 1733.2 | 60.5 | 2   | R.FVHSENQHLVSPEALDFLDK.L                                                                                      |
|               | HsFLAG-p53-DNA-D    | 4.5539 | 0.3756 | 2329.04 | 2326.571 | 7712.5  | 1 | 1905.7 | 44.7 | 2   | R.FVHSENQHLVSPEALDFLDK.L                                                                                      |
| gi 5454024 re |                     | 3      | 3      | 21.60%  | 268      | 29321   |   |        |      |     | 8.9 ribonuclease P (30kD) [Homo sapiens]                                                                      |
| *             | HsSrcap_Ti_204.319  | 2.9913 | 0.2258 | 2558.35 | 2556.018 | 8241.8  | 1 | 523.5  | 38.6 | 1   | K.KQEIEKPVAVSELFTTLPIVQGK.S                                                                                   |
| *             | HsFlag-VPS71_Ti_1C  | 3.5737 | 0.2708 | 1669.13 | 1668.934 | 5547.6  | 1 | 717.9  | 64.3 | 1   | K.NVISSAAERPLEIR.G                                                                                            |
| *             | HsYL1_Ti_102.3386.  | 2.9703 | 0.3155 | 2068.15 | 2067.303 | 6934.5  | 1 | 578    | 44.7 | 1   | R.GPYDVANLGLLFGLESSEDAK.A                                                                                     |
| gi 27436929 r |                     | 14     | 487    | 21.50%  | 641      | 70405   |   |        |      |     | 6 heat shock 70kDa protein 1-like [Homo sapiens]                                                              |
|               | HsFlag-FLJ90652_2C  | 3.6517 | 0.3726 | 1487.89 | 1488.594 | 3812.9  | 1 | 610.4  | 75   | 34  | R.TTPSYVAFTDTER.L                                                                                             |
|               | Hs293Flag-les2_Ti_1 | 3.2174 | 0.4318 | 1488.58 | 1488.594 | 3710.2  | 1 | 167.1  | 54.2 | 6   | R.TTPSYVAFTDTER.L                                                                                             |
|               | HsFLAG-FLJ20729_    | 4.0267 | 0.3494 | 1616.65 | 1615.882 | 4580.3  | 1 | 846.5  | 76.9 | 19  | K.AFYPEEISSMVLTK.L                                                                                            |
|               | HsFlag-FLJ20643_Ti  | 2.8122 | 0.287  | 1197.73 | 1198.408 | 3228.1  | 7 | 262.1  | 59.1 | 5   | K.DAGVIAGLNVL.R.I                                                                                             |
|               | HsFLAG-ARP6_Ti_1    | 4.5976 | 0.2685 | 1198.23 | 1198.408 | 6316.9  | 1 | 2167   | 95.5 | 46  | K.DAGVIAGLNVL.R.I                                                                                             |
|               | HsFLAG-Lin9_Ti_20   | 5.2508 | 0.4465 | 1660.49 | 1660.908 | 5331.5  | 1 | 1768.4 | 80   | 50  | R.IINEPTAAAIAAYGLDK.G                                                                                         |
|               | HsFlag-ZnF-HIT2_Ti  | 4.6766 | 0.4075 | 1675.9  | 1676.696 | 6824.2  | 1 | 1767   | 76.7 | 48  | K.ATAGDTHLGGEDFDNR.L                                                                                          |
|               | HsFLAG-ARP6_Ti_1    | 6.6812 | 0.5227 | 2303.95 | 2305.608 | 7222.4  | 1 | 2114.5 | 63.6 | 124 | K.SINPDEAVAYGAAVQAAILMGDK.S                                                                                   |
|               | HsFLAG-ARP6_Ti_1    | 6.7971 | 0.4665 | 2304.11 | 2305.608 | 8353    | 1 | 2965.1 | 46.6 | 47  | K.SINPDEAVAYGAAVQAAILMGDK.S                                                                                   |
|               | HsFLAG-FLJ20309_    | 5.4572 | 0.4673 | 2788.6  | 2788.043 | 9884.1  | 1 | 1776.8 | 37   | 8   | K.QTQIFTTYSNQPGLVLIQVYEGE.R.A                                                                                 |
|               | HsFlag-ZnF-HIT2_Ti  | 4.6245 | 0.4536 | 2788.77 | 2788.043 | 6989.1  | 1 | 643    | 41.3 | 55  | K.QTQIFTTYSNQPGLVLIQVYEGE.R.A                                                                                 |
|               | HsFLAG-TCF3_Ti_1C   | 3.0245 | 0.244  | 1138.56 | 1138.222 | 3708.8  | 1 | 704.6  | 93.8 | 3   | K.YKAEDVQR.E                                                                                                  |
|               | HsFlag-FLJ90652_2C  | 4.362  | 0.2456 | 1288.02 | 1288.461 | 6806.6  | 1 | 1526.8 | 90   | 24  | K.NALESYAFNMK.S                                                                                               |
|               | HsFLAG-ARP6_Ti_1    | 3.1355 | 0.2732 | 1289.43 | 1288.461 | 4692.1  | 1 | 433.4  | 70   | 18  | K.NALESYAFNMK.S                                                                                               |
| gi 7662502 re |                     | 2      | 4      | 21.50%  | 181      | 20555   |   |        |      |     | 8.8 malignant T cell amplified sequence 1 [Homo sapiens]                                                      |
| *             | HsFlag-VPS71_Ti_1C  | 3.0141 | 0.1481 | 2396.35 | 2396.81  | 5545.7  | 1 | 404.8  | 42.1 | 2   | K.NQLIEQFPGIEPWLNQIMPK.K                                                                                      |
| *             | HsFlag-VPS71_Ti_1C  | 3.305  | 0.354  | 1921.85 | 1921.228 | 5927.9  | 1 | 516.9  | 47.2 | 2   | K.FVLSGANIMCPLTSPGAK.L                                                                                        |
| gi 88942850 r |                     | 5      | 23     | 21.40%  | 294      | 32601   |   |        |      |     | 4.8 PREDICTED: similar to 40S ribosomal protein SA (p40) (34/67 kDa laminin receptor) (Colon carcinoma lamini |
| gi 88951517 r |                     | 5      | 23     | 21.40%  | 294      | 32601   |   |        |      |     | 4.8 PREDICTED: similar to 40S ribosomal protein SA (p40) (34/67 kDa laminin receptor) (Colon carcinoma lamini |
| gi 88951515 r |                     | 5      | 23     | 21.40%  | 294      | 32601   |   |        |      |     | 4.8 PREDICTED: similar to 40S ribosomal protein SA (p40) (34/67 kDa laminin receptor) (Colon carcinoma lamini |
| gi 88951513 r |                     | 5      | 23     | 21.40%  | 294      | 32601   |   |        |      |     | 4.8 PREDICTED: similar to 40S ribosomal protein SA (p40) (34/67 kDa laminin receptor) (Colon carcinoma lamini |
| gi 88951511 r |                     | 5      | 23     | 21.40%  | 294      | 32601   |   |        |      |     | 4.8 PREDICTED: similar to 40S ribosomal protein SA (p40) (34/67 kDa laminin receptor) (Colon carcinoma lamini |
| gi 88951507 r |                     | 5      | 23     | 21.40%  | 294      | 32601   |   |        |      |     | 4.8 PREDICTED: similar to 40S ribosomal protein SA (p40) (34/67 kDa laminin receptor) (Colon carcinoma lamini |
| gi 88951505 r |                     | 5      | 23     | 21.40%  | 294      | 32601   |   |        |      |     | 4.8 PREDICTED: similar to 40S ribosomal protein SA (p40) (34/67 kDa laminin receptor) (Colon carcinoma lamini |
| gi 88942860 r |                     | 5      | 23     | 21.40%  | 294      | 32601   |   |        |      |     | 4.8 PREDICTED: similar to 40S ribosomal protein SA (p40) (34/67 kDa laminin receptor) (Colon carcinoma lamini |
| gi 88942858 r |                     | 5      | 23     | 21.40%  | 294      | 32601   |   |        |      |     | 4.8 PREDICTED: similar to 40S ribosomal protein SA (p40) (34/67 kDa laminin receptor) (Colon carcinoma lamini |
| gi 88942856 r |                     | 5      | 23     | 21.40%  | 294      | 32601   |   |        |      |     | 4.8 PREDICTED: similar to 40S ribosomal protein SA (p40) (34/67 kDa laminin receptor) (Colon carcinoma lamini |
| gi 88942854 r |                     | 5      | 23     | 21.40%  | 294      | 32601   |   |        |      |     | 4.8 PREDICTED: similar to 40S ribosomal protein SA (p40) (34/67 kDa laminin receptor) (Colon carcinoma lamini |
|               | HsFlag-NUFIP_Ti_1C  | 3.5193 | 0.3235 | 2616.14 | 2618.967 | 9326.7  | 1 | 632.1  | 36.4 | 3   | K.FLAAGTHLGGTNLDFQMEQYIYK.R                                                                                   |
|               | HsFlag-NUFIP_Ti_1C  | 4.6361 | 0.1686 | 2617.8  | 2618.967 | 11645.9 | 1 | 1168.9 | 31.8 | 1   | K.FLAAGTHLGGTNLDFQMEQYIYK.R                                                                                   |
|               | HsFlag-NUFIP_Ti_1C  | 3.2111 | 0.1384 | 1136.52 | 1136.334 | 3726.7  | 3 | 871.1  | 83.3 | 9   | K.SDGIYIINLK.R                                                                                                |
|               | HsFLAG-TCF3_Ti_1C   | 3.9474 | 0.3587 | 1742.78 | 1741.982 | 7911.5  | 1 | 1408.1 | 65.6 | 3   | R.AIVAIENPADVSVISSR.N                                                                                         |
|               | HsFlag-NUFIP_Ti_1C  | 4.2588 | 0.3692 | 1204.09 | 1204.371 | 8028.8  | 1 | 1826.1 | 83.3 | 7   | K.FAAATGATPIAGR.F                                                                                             |
| gi 9506651 re |                     | 3      | 7      | 21.40%  | 234      | 26093   |   |        |      |     | 6.2 potassium channel tetramerisation domain containing 5 [Homo sapiens]                                      |
| *             | HsFLAG-Lin9_Ti_20   | 4.1738 | 0.3362 | 1659.34 | 1659.849 | 8648.1  | 2 | 1227.3 | 59.4 | 1   | R.CSAGLGALAQRPQSVSK.W                                                                                         |
| *             | HsFLAG-Lin9_Ti_20   | 3.0599 | 0.2432 | 1343.72 | 1342.538 | 9104    | 1 | 995.8  | 68.2 | 1   | R.LNVGGTYFLTTR.Q                                                                                              |

|                    |                    |               |                  |                 |                    |             |                                                                        |                |      |    |                                    |
|--------------------|--------------------|---------------|------------------|-----------------|--------------------|-------------|------------------------------------------------------------------------|----------------|------|----|------------------------------------|
| *<br>gi 4507191 re | HsFLAG-FLJ20729_38 | 5.4786<br>156 | 0.4185<br>21.30% | 2385.61<br>2472 | 2384.642<br>284281 | 9155<br>5.3 | 1<br>spectrin, alpha, non-erythrocytic 1 (alpha-fodrin) [Homo sapiens] | 1739.8<br>57.5 | 57.5 | 5  | K.DLAEEGVLEEAIFYNITSLIK.L          |
| *                  | HsFLAG-p53-DNA-D   | 2.9142        | 0.2463           | 1870.09         | 1869.015           | 7925.9      | 1                                                                      | 552.2          | 53.6 | 1  | K.KFEEFQTDMAAHEER.V                |
| *                  | HsFLAG-ARP6_Ti_1   | 4.1049        | 0.2671           | 1606.28         | 1606.816           | 5769.7      | 2                                                                      | 1143.9         | 79.2 | 3  | K.LIQEQHPPEELIK.T                  |
| *                  | HsFLAG-FLJ20729_38 | 4.5952        | 0.2414           | 2565.6          | 2565.855           | 7780.9      | 1                                                                      | 1338.3         | 36.4 | 2  | K.ALCAEADRLQQSHPLSATQIQVK.R        |
| *                  | HsFLAG-ARP6_Ti_1   | 4.6341        | 0.2447           | 1678.28         | 1678.929           | 4843.4      | 1                                                                      | 872.4          | 71.4 | 4  | R.LQQSHPLSATQIQVK.R                |
| *                  | HsFLAG-ARP6_Ti_1   | 3.8995        | 0.3009           | 1679            | 1678.929           | 5396.2      | 1                                                                      | 1394.5         | 55.4 | 2  | R.LQQSHPLSATQIQVK.R                |
| *                  | HsARP6-FLAG_Ti_1   | 5.0792        | 0.2772           | 2127.29         | 2128.344           | 7209.9      | 1                                                                      | 1789.9         | 42.5 | 3  | K.ALINADELASDVAGAEALLDR.H          |
| *                  | HsFLAG-p53-DNA-D   | 6.1288        | 0.4757           | 2127.68         | 2128.344           | 10239.4     | 1                                                                      | 2738.1         | 65   | 9  | K.ALINADELASDVAGAEALLDR.H          |
| *                  | HsARP6-FLAG_Ti_1   | 3.693         | 0.1037           | 1214.28         | 1214.45            | 7335        | 1                                                                      | 1125.2         | 77.8 | 3  | R.AALLELWELR.R                     |
| *                  | HsFLAG-p53-DNA-D   | 4.9757        | 0.3897           | 1708.84         | 1708.917           | 8842.4      | 1                                                                      | 1935.8         | 76.9 | 4  | R.AQLADSFHLQQFFR.D                 |
| *                  | HsFlag-VPS71_Ti_1  | 3.9852        | 0.3281           | 1531.23         | 1532.659           | 8118.7      | 1                                                                      | 1401.9         | 81.8 | 1  | K.LREANQQQQFNR.N                   |
| *                  | HsFlag-VPS71_Ti_1  | 4.0659        | 0.3289           | 2696.62         | 2695.899           | 7549.5      | 1                                                                      | 1010           | 47.7 | 2  | R.NVEDIELWLYEVEGHASDDYGK.D         |
| *                  | HsFLAG-ARP6_Ti_1   | 3.5502        | 0.2097           | 1556.46         | 1557.709           | 5875.5      | 1                                                                      | 1082.1         | 50   | 1  | K.HQALQAEIAGHEPR.I                 |
| *                  | HsARP6-FLAG_Ti_1   | 3.5917        | 0.2527           | 1484.57         | 1484.689           | 7061.4      | 1                                                                      | 1023.3         | 72.7 | 5  | K.ELVLALYDYQEK.S                   |
| *                  | HsFLAG-ARP6_Ti_1   | 4.6436        | 0.3105           | 1417.42         | 1417.646           | 7949.6      | 1                                                                      | 1811.1         | 79.2 | 5  | K.KGDILTLLNSTNK.D                  |
| *                  | HsFLAG-FLJ20729_38 | 3.915         | 0.2444           | 1324.88         | 1325.467           | 6529.6      | 1                                                                      | 1188           | 77.3 | 17 | R.SQLLGSHEVQR.F                    |
| *                  | HsARP6-FLAG_Ti_1   | 2.8629        | 0.1877           | 1041.26         | 1041.109           | 8444.2      | 4                                                                      | 1126.2         | 81.2 | 3  | K.LGDSHDLQR.F                      |
| *                  | HsFlag-NUFIP_Ti_11 | 5.0216        | 0.2791           | 2877.43         | 2877.188           | 7145.6      | 1                                                                      | 1639           | 37   | 11 | R.AGTFQAFEQFGQQLLAHGHIASPEIK.Q     |
| *                  | HsFLAG-p53-DNA-D   | 5.3361        | 0.3718           | 1972.32         | 1973.282           | 5625.4      | 1                                                                      | 1424.3         | 47.2 | 13 | K.IAALQAFADQLIAAGHYAK.G            |
| *                  | HsFlag-VPS71_Ti_1  | 5.4127        | 0.3991           | 1972.94         | 1973.282           | 7017.1      | 1                                                                      | 1926.4         | 66.7 | 18 | K.IAALQAFADQLIAAGHYAK.G            |
| *                  | HsARP6-FLAG_Ti_1   | 3.8595        | 0.3349           | 1435.99         | 1434.543           | 6876.4      | 1                                                                      | 1635.2         | 86.4 | 1  | R.DVDEIEAWISEK.L                   |
| *                  | HsFLAG-ARP6_Ti_1   | 4.7021        | 0.3276           | 1633.39         | 1631.915           | 7722.8      | 1                                                                      | 2092.3         | 80.8 | 3  | R.LAALADQWQFLVQK.S                 |
| *                  | HsFLAG-ARP6_Ti_1   | 3.7236        | 0.4137           | 2245.69         | 2246.408           | 10052.4     | 1                                                                      | 832.7          | 45   | 1  | K.DLNSQADSLMTSSAFDTSQVK.D          |
| *                  | HsFLAG-ARP6_Ti_1   | 3.6753        | 0.1952           | 1268.52         | 1268.337           | 4364.9      | 4                                                                      | 841.8          | 83.3 | 3  | R.DMDDEESWIK.E                     |
| *                  | HsFlag-FLJ90652_29 | 2.8862        | 0.3465           | 2221.98         | 2219.503           | 3183.8      | 1                                                                      | 185.2          | 47.5 | 1  | K.RLEAELAAHEPAIQGVLDTGK.K          |
| *                  | HsFlag-FLJ90652_29 | 2.6923        | 0.1918           | 1876.5          | 1875.046           | 8795.8      | 2                                                                      | 686.5          | 56.7 | 1  | K.KLSDDNITIGKEEIQQR.L              |
| *                  | HsFLAG-ARP6_Ti_1   | 3.1776        | 0.0915           | 1158.25         | 1158.345           | 5974.3      | 1                                                                      | 1117.9         | 87.5 | 3  | R.LAQFVEHWK.E                      |
| *                  | HsMRGBP-FLAG_Ti_1  | 4.4062        | 0.4705           | 2212.3          | 2210.548           | 8456.3      | 1                                                                      | 1516.9         | 60   | 4  | K.MTLVASEDYGDTLAAIQGLLK.K          |
| *                  | HsARP6-FLAG_Ti_1   | 4.6427        | 0.3698           | 2495.38         | 2494.764           | 7303.2      | 1                                                                      | 1503.8         | 38.6 | 2  | K.QETFDAGLQAFQQEGIANITALK.D        |
| *                  | HsFLAG-p53-DNA-D   | 5.1793        | 0.4641           | 3234.51         | 3234.634           | 7586.8      | 1                                                                      | 701.5          | 25.9 | 2  | K.QETFDAGLQAFQQEGIANITALKDQLLAAK.H |
| *                  | HsARP6-FLAG_Ti_1   | 3.4416        | 0.3239           | 1373.29         | 1373.558           | 6464.6      | 1                                                                      | 933.5          | 72.7 | 2  | K.RWSQLLANSAAAR.K                  |
| *                  | HsFlag-VPS71_Ti_1  | 5.6268        | 0.4826           | 2300.35         | 2299.415           | 6786.8      | 1                                                                      | 1653           | 63.2 | 8  | K.ASAFNWSWFENAEEDLTPVR.C           |
| *                  | HsFlag-VPS71_Ti_1  | 4.769         | 0.2408           | 1953.16         | 1953.073           | 7003.2      | 1                                                                      | 1976.7         | 70.6 | 5  | R.SSLSSAQADFNQLAELDR.Q             |
| *                  | HsFlag-VPS71_Ti_1  | 4.5776        | 0.4923           | 2333.87         | 2332.592           | 7814.2      | 1                                                                      | 939.8          | 52.8 | 4  | R.VASNPTYWFTMEALEETWR.N            |
| *                  | HsFLAG-FLJ20729_38 | 5.8314        | 0.3679           | 2512.85         | 2511.765           | 8909.1      | 1                                                                      | 1753.7         | 40.8 | 2  | K.LRQEFAQHANAQHWIQWQTR.T           |
| *                  | HsFLAG-FLJ20729_38 | 3.9106        | 0.1991           | 1495.83         | 1496.684           | 8254.6      | 1                                                                      | 1523.9         | 81.8 | 2  | R.MQHNLEQQIQAR.N                   |
| *                  | HsARP6-FLAG_Ti_1   | 2.9771        | 0.1694           | 1280.4          | 1280.464           | 6693.1      | 1                                                                      | 963.8          | 72.7 | 2  | R.ALSSEGKPYVTK.E                   |
| *                  | HsFLAG-p53-DNA-D   | 4.4544        | 0.3079           | 2427.81         | 2427.717           | 8126.7      | 1                                                                      | 1336.9         | 36.2 | 2  | R.ALSSEGKPYVTKELYQNLTR.E           |
| *                  | HsFlag-DPCD_Ti_20  | 3.4629        | 0.3948           | 1800.87         | 1801.996           | 7430.6      | 1                                                                      | 1177.4         | 67.9 | 1  | K.GRELPTAFDYVEFTR.S                |
| gi 5031755 re      |                    | 11<br>41      | 21.30%           | 633             | 70943              | 8.1         | heterogeneous nuclear ribonucleoprotein R [Homo sapiens]               |                |      |    |                                    |
| *                  | HsFLAG-p53-DNA-D   | 2.8861        | 0.1519           | 1157.57         | 1157.225           | 7170.7      | 1                                                                      | 717.6          | 72.2 | 2  | K.ESDLSHVQNK.S                     |
| *                  | HsFLAG-p53-DNA-D   | 4.9671        | 0.3538           | 2636.47         | 2636.964           | 5383.5      | 1                                                                      | 793.7          | 34   | 2  | R.KYGGPPDVSVYSGVQPGIGTEVFGK.I      |

|                |                    |        |        |         |          |         |   |        |      |                                                                           |
|----------------|--------------------|--------|--------|---------|----------|---------|---|--------|------|---------------------------------------------------------------------------|
| *              | HsFLAG-p53-DNA-D   | 4.9364 | 0.2451 | 3002.78 | 3003.428 | 9472.8  | 1 | 1245.1 | 31.2 | 1 R.KYGGPPPPDSVYSGVQPGIGTEVFGKIPR.D                                       |
| *              | HsFLAG-Lin9_Ti_20  | 4.6609 | 0.4565 | 2506.89 | 2508.79  | 5769    | 1 | 1029.2 | 52.1 | 6 K.YGGPPPPDSVYSGVQPGIGTEVFGK.I                                           |
| *              | HsFLAG-FLJ20729_   | 4.0194 | 0.3263 | 1610.12 | 1610.801 | 4113.9  | 1 | 1350.3 | 83.3 | 4 R.DLYEDELVPLFEK.A                                                       |
| *              | HsFlag-VPS71_Ti_10 | 3.5731 | 0.2527 | 1338.84 | 1338.469 | 6782.9  | 2 | 1118.4 | 75   | 1 K.LCDSYEIRPGK.H                                                         |
| *              | HsFLAG-p53-DNA-D   | 3.1692 | 0.2731 | 1940.64 | 1942.176 | 10980.5 | 2 | 823.7  | 46.9 | 1 K.VTEGLVDVILYHQPD DK.K                                                  |
| *              | HsFLAG-p53-DNA-D   | 3.3551 | 0.1443 | 1445.06 | 1445.537 | 9198    | 1 | 1625.8 | 85   | 3 R.GFCFLEYEDHK.S                                                         |
| *              | HsFLAG-p53-DNA-D   | 4.6446 | 0.3541 | 1461.55 | 1461.653 | 7736.2  | 1 | 1930.8 | 83.3 | 13 R.NLATTVTTEEILEK.S                                                     |
| *              | HsFLAG-Lin9_Ti_20  | 5.0708 | 0.3153 | 1909.5  | 1910.172 | 7905.6  | 1 | 1142.7 | 59.4 | 5 K.EIEGEEIEIVLAKPPDK.K                                                   |
| *              | HsFLAG-p53-DNA-D   | 3.814  | 0.4035 | 1759.59 | 1759.872 | 5515.7  | 1 | 675.7  | 57.7 | 3 R.STAYEDYYYHPPPR.M                                                      |
| gij 6912494 re |                    | 3      | 7      | 21.30%  | 268      | 29999   |   |        |      | 5.1 microtubule-associated protein, RP/EB family, member 1 [Homo sapiens] |
| *              | HsFlag-VPS71_Ti_10 | 2.9071 | 0.3173 | 2020.39 | 2020.337 | 4747.7  | 1 | 468    | 50   | 2 R.QGQETAVAPSLVAPALNKPK.K                                                |
| *              | HsFLAG-p53-DNA-D   | 3.9308 | 0.2763 | 1925.86 | 1926.183 | 9480.4  | 1 | 1000.1 | 52.9 | 4 K.KPLTSSSAAPQRPISTQR.T                                                  |
| *              | HsFlag-VPS71_Ti_10 | 3.5032 | 0.38   | 2270.69 | 2271.412 | 6239.3  | 1 | 625.9  | 50   | 1 R.NIELICQENEGENDPVLQR.I                                                 |
| gij 14589953 r |                    | 3      | 5      | 21.30%  | 150      | 17143   |   |        |      | 4.7 PolII_Rpb8 (RNA polymerase II, polypeptide H) [Homo sapiens]          |
| *              | HsFlag-FLJ20643_Ti | 4.4042 | 0.2777 | 1800.04 | 1798.904 | 6764.6  | 1 | 1585.7 | 70   | 2 K.VYRIEGDETSTEAATR.L                                                    |
| *              | HsFlag-FLJ20643_Ti | 3.4803 | 0.309  | 1381.28 | 1380.408 | 5507.7  | 1 | 950.5  | 75   | 1 R.IEGDETSTEAATR.L                                                       |
| *              | HsFlag-NUFIP_Ti_10 | 4.7919 | 0.488  | 1772.28 | 1772.872 | 6850.6  | 1 | 1274   | 66.7 | 2 R.LQGDANNLHGFEVDSR.V                                                    |
| gij 21536320 r |                    | 9      | 28     | 21.20%  | 756      | 84794   |   |        |      | 8.8 E1B-55kDa-associated protein 5 isoform d [Homo sapiens]               |
| gij 21536326 r |                    | 9      | 28     | 18.70%  | 856      | 95739   |   |        |      | 6.9 E1B-55kDa-associated protein 5 isoform a [Homo sapiens]               |
| gij 21536322 r |                    | 9      | 28     | 19.90%  | 804      | 90292   |   |        |      | 6.9 E1B-55kDa-associated protein 5 isoform b [Homo sapiens]               |
|                | HsFlag-NUFIP_Ti_10 | 2.6735 | 0.2141 | 2039.68 | 2040.283 | 4667.1  | 3 | 251.3  | 41.7 | 1 K.QGAPTSFLPPEASQLKPD.R.Q                                                |
|                | HsFLAG-ARP6_Ti_10  | 4.3225 | 0.4554 | 2077.07 | 2076.316 | 8893.9  | 1 | 989.5  | 50   | 8 R.SSGYPLTIEGFAYLWSGAR.A                                                 |
|                | HsFlag-NUFIP_Ti_10 | 2.7949 | 0.1676 | 1484.52 | 1484.655 | 3848.9  | 2 | 478.7  | 66.7 | 2 K.HLPSTEPDPHVVR.I                                                       |
|                | HsFLAG-Lin9_Ti_20  | 3.1794 | 0.3315 | 2798    | 2797.958 | 6826.5  | 1 | 399.2  | 34   | 1 R.IGWSLDCSTQLGEEPFYSYGGTGTG.K                                           |
|                | HsFlag-NUFIP_Ti_10 | 4.395  | 0.389  | 1596.64 | 1595.882 | 7400.5  | 1 | 1299.3 | 71.4 | 10 K.EALGGQALYPHVLVK.N                                                    |
|                | HsFLAG-Lin9_Ti_20  | 2.581  | 0.1253 | 2561.85 | 2562.894 | 4948.5  | 3 | 235.9  | 33.3 | 1 R.AEPYCSVLPGFTFIQHLPLSER.I                                              |
|                | HsFLAG-ARP6_Ti_10  | 4.0166 | 0.4265 | 1742.29 | 1742.886 | 7779.1  | 1 | 1332.9 | 71.4 | 2 R.NYILDQTNVYGSAGR.R                                                     |
|                | HsFlag-NUFIP_Ti_11 | 2.7858 | 0.2086 | 1168.57 | 1168.359 | 4874.2  | 4 | 529.1  | 75   | 1 K.MRPFEGFQR.K                                                           |
|                | HsFLAG-Lin9_Ti_20  | 4.3236 | 0.3737 | 2555.43 | 2552.886 | 10312.9 | 1 | 891.1  | 42.9 | 2 K.ANFTLPDVGDFLDEVLFIELQR.E                                              |
| gij 12056468 r |                    | 11     | 31     | 21.20%  | 745      | 81745   |   |        |      | 6.1 junction plakoglobin [Homo sapiens]                                   |
| gij 4504811 re |                    | 11     | 31     | 21.20%  | 745      | 81745   |   |        |      | 6.1 junction plakoglobin [Homo sapiens]                                   |
|                | HsFLAG-ARP6_Ti_10  | 3.946  | 0.3141 | 1412.7  | 1412.734 | 5349.5  | 1 | 1214.8 | 76.9 | 2 R.ALMGSPQLVAAVVR.T                                                      |
|                | HsFLAG-ARP6_Ti_10  | 4.2396 | 0.3354 | 1808.87 | 1808.236 | 9688.3  | 1 | 770.8  | 50   | 3 K.LIILANGGPQALVQIMR.N                                                   |
|                | HsFLAG-ARP6_Ti_10  | 4.1129 | 0.2985 | 2328.55 | 2327.711 | 5526.2  | 1 | 864    | 34.1 | 1 K.VLSVCPSPNKPAIVEAGGMQALGK.H                                            |
|                | HsFLAG-ARP6_Ti_10  | 3.463  | 0.25   | 1303.54 | 1303.513 | 7930    | 1 | 1399.4 | 88.9 | 2 R.LVQNCLWTLR.N                                                          |
|                | HsFLAG-ARP6_Ti_10  | 4.1109 | 0.4276 | 1831.56 | 1832.061 | 8870.6  | 1 | 1457   | 65.6 | 2 R.NLSDVATKQEGLESVLK.I                                                   |
|                | HsFLAG-ARP6_Ti_10  | 4.5405 | 0.465  | 1935.73 | 1936.262 | 9628.6  | 1 | 1290.2 | 58.8 | 3 K.TLVTQNSGVEALIHAILR.A                                                  |
|                | HsFLAG-ARP6_Ti_10  | 3.1636 | 0.2769 | 1450.39 | 1450.724 | 4451.4  | 1 | 788    | 81.8 | 1 K.LLNQPNQWPLVK.A                                                        |
|                | HsFLAG-ARP6_Ti_10  | 4.666  | 0.378  | 2154.63 | 2156.459 | 6690.3  | 1 | 841.5  | 52.6 | 4 R.NLALCPANHAPLQEAIVIPR.L                                                |
|                | HsFLAG-ARP6_Ti_10  | 5.6947 | 0.4347 | 2156.55 | 2156.459 | 7322.6  | 1 | 1385.4 | 42.1 | 6 R.NLALCPANHAPLQEAIVIPR.L                                                |
|                | HsFLAG-ARP6_Ti_10  | 5.2619 | 0.4428 | 1599.86 | 1600.731 | 5023.8  | 1 | 1390.5 | 82.1 | 2 R.HVAAGTQQPYTDGVR.M                                                     |
|                | HsFLAG-ARP6_Ti_10  | 3.502  | 0.3672 | 1392.67 | 1393.626 | 7202.6  | 1 | 975.4  | 72.7 | 5 K.RVSVELTNSLFFK.H                                                       |
| gij 40217790 r |                    | 9      | 19     | 21.20%  | 567      | 64682   |   |        |      | 9.8 zinc finger protein 512 [Homo sapiens]                                |

|               |                    |        |        |         |          |         |                                                                       |        |      |    |                                             |
|---------------|--------------------|--------|--------|---------|----------|---------|-----------------------------------------------------------------------|--------|------|----|---------------------------------------------|
| *             | HsFLAG-ARP6_Ti_1   | 3.7281 | 0.1767 | 2147.3  | 2147.315 | 6042.5  | 1                                                                     | 815    | 37.5 | 1  | R.SEHGPISFFPESGQPECLK.E                     |
| *             | HsFLAG-ARP6_Ti_1   | 4.0258 | 0.4153 | 2149.91 | 2147.315 | 6482.9  | 1                                                                     | 810.4  | 58.3 | 2  | R.SEHGPISFFPESGQPECLK.E                     |
| *             | HsFLAG-Lin9_Ti_20  | 4.7171 | 0.3386 | 1756.63 | 1757.04  | 8556.6  | 1                                                                     | 1765.1 | 70   | 6  | K.IAVYHLQELASAEK.E                          |
| *             | HsFLAG-ARP6_Ti_1   | 3.5689 | 0.313  | 1873.74 | 1874.15  | 5901.6  | 1                                                                     | 425.7  | 50   | 1  | K.YTRPGLPTFSQEVHLK.W                        |
| *             | HsFLAG-ARP6_Ti_1   | 4.6606 | 0.4451 | 2098.26 | 2098.25  | 6556.1  | 1                                                                     | 1207   | 63.9 | 2  | R.IQCPNQGCEAVYSSVSLK.A                      |
| *             | HsFLAG-Lin9_Ti_20  | 2.9003 | 0.2827 | 1531.77 | 1532.706 | 5946.9  | 1                                                                     | 535.2  | 53.6 | 1  | K.AHLGSCTLGNFVAGK.Y                         |
| *             | HsFLAG-Lin9_Ti_20  | 4.072  | 0.4736 | 1532.06 | 1532.706 | 6848.7  | 1                                                                     | 1746.6 | 78.6 | 4  | K.AHLGSCTLGNFVAGK.Y                         |
| *             | HsFLAG-Lin9_Ti_20  | 4.3305 | 0.4374 | 2361.28 | 2359.603 | 9555.1  | 1                                                                     | 1103.7 | 50   | 1  | K.YHINSVHAEDWFFVNPPTTK.S                    |
| *             | HsFLAG-Lin9_Ti_20  | 2.6932 | 0.1498 | 1711.62 | 1710.925 | 7042.6  | 2                                                                     | 472.6  | 50   | 1  | R.QQPGIELPETELSLR.V                         |
| gi 4504511 re | 5                  | 30     | 21.20% | 397     | 44868    | 7.1     | DnaJ (Hsp40) homolog, subfamily A, member 1 [Homo sapiens]            |        |      |    |                                             |
| *             | HsFLAG-ARP8_Ti_2   | 3.6878 | 0.4721 | 2325.25 | 2324.547 | 8268.2  | 1                                                                     | 542.7  | 37   | 3  | K.EGGAGGGFGSPMDIFDMFFGGGGR.M                |
| *             | HsFlag-NUFIP_Ti_2  | 4.0869 | 0.2328 | 2720.97 | 2722.024 | 7721    | 1                                                                     | 1590.4 | 34.4 | 3  | K.ITFHGEGDQEPGLEPGDIIIVLDQK.D               |
| *             | HsSrcap_Ti_205.181 | 2.9398 | 0.261  | 1392.62 | 1393.67  | 6160.8  | 1                                                                     | 524.4  | 58.3 | 4  | R.TIVITSHPGQIVK.H                           |
| *             | HsFlag-NUFIP_Ti_2  | 3.8172 | 0.2649 | 1393.39 | 1393.67  | 7602.2  | 1                                                                     | 1243.8 | 75   | 17 | R.TIVITSHPGQIVK.H                           |
| *             | HsFLAG-ARP6_Ti_1   | 4.0696 | 0.3483 | 2666.18 | 2667.771 | 5849.2  | 1                                                                     | 795.4  | 47.6 | 3  | K.EVEETDEMDQVELVDFDPNQR.R                   |
| gi 4504983 re | 4                  | 9      | 21.20% | 250     | 26188    | 8.5     | galectin 3 [Homo sapiens]                                             |        |      |    |                                             |
| *             | HsARP6-FLAG_Ti_1   | 3.461  | 0.1409 | 1642.66 | 1642.013 | 6691.7  | 1                                                                     | 1036.7 | 64.3 | 3  | R.MLITILGTVKPNANR.I                         |
| *             | HsMRGBP-FLAG_Ti_1  | 2.9811 | 0.2675 | 1275.95 | 1274.381 | 6036.8  | 1                                                                     | 948.7  | 70   | 2  | R.GNDVAFHFNPR.F                             |
| *             | HsFlag-VPS71_Ti_1  | 3.5237 | 0.2553 | 1499.82 | 1498.722 | 4895.4  | 2                                                                     | 578.8  | 70.8 | 3  | R.QSVFPFESGKPKF.I                           |
| *             | HsFLAG-Lin9_Ti_20  | 2.9456 | 0.2105 | 1650.78 | 1650.837 | 9160.1  | 1                                                                     | 916.8  | 57.7 | 1  | K.VAVNDAHLLQYNHR.V                          |
| gi 4503531 re | 7                  | 19     | 21.10% | 407     | 46394    | 5.5     | eukaryotic translation initiation factor 4A, isoform 2 [Homo sapiens] |        |      |    |                                             |
| *             | HsFLAG-Lin9_Ti_20  | 2.3621 | 0.254  | 1047.39 | 1048.183 | 9240.5  | 1                                                                     | 837.8  | 75   | 2  | R.GIYAYGFEK.P                               |
| *             | HsFLAG-ARP6_Ti_1   | 4.6012 | 0.3935 | 1829.59 | 1829.065 | 4460.2  | 1                                                                     | 954.3  | 73.3 | 7  | R.GIYAYGFEKPSAIQQR.A                        |
| *             | HsFLAG-Lin9_Ti_20  | 2.8501 | 0.2821 | 1546.3  | 1545.782 | 10094.2 | 1                                                                     | 976.6  | 60.7 | 1  | K.LQAEAPHIVVGTGR.V                          |
| *             | HsFlag-VPS71_Ti_1  | 4.883  | 0.3827 | 1556.72 | 1556.789 | 7213.7  | 1                                                                     | 2553.4 | 91.7 | 2  | K.MFVLDEADEMLSR.G                           |
| *             | HsFLAG-Lin9_Ti_20  | 3.6979 | 0.2526 | 1115.19 | 1115.359 | 6528.4  | 1                                                                     | 1517.9 | 94.4 | 2  | R.VLITTDLLAR.G                              |
| *             | HsFLAG-Lin9_Ti_20  | 5.0028 | 0.364  | 2144.5  | 2145.42  | 8462.8  | 1                                                                     | 1564.8 | 58.3 | 3  | R.GIDVQQVSLVINYLPTNR.E                      |
| *             | HsFLAG-Lin9_Ti_20  | 3.6037 | 0.2739 | 1479.45 | 1478.645 | 7904.6  | 1                                                                     | 893.8  | 66.7 | 2  | K.GVAINFVTEEDKR.I                           |
| gi 24308261 r | 8                  | 15     | 20.90% | 536     | 60654    | 4.5     | mesoderm induction early response 1 [Homo sapiens]                    |        |      |    |                                             |
| *             | HsH2AZ-FLAG_293_   | 5.2252 | 0.4603 | 3477.38 | 3478.492 | 6647.2  | 1                                                                     | 957.5  | 28.2 | 1  | K.DSSGQEDETQSSNDPSQSVASQDAQEIRPR.R          |
| *             | HsH2AZ-FLAG_293_   | 5.3396 | 0.3698 | 2382.25 | 2382.542 | 6620.2  | 1                                                                     | 1229.1 | 58.3 | 3  | K.VYENDDQLLDWPEYLPEDK.V                     |
| *             | HsH2AZ-FLAG_293_   | 2.4859 | 0.224  | 1236.39 | 1237.398 | 4877.4  | 8                                                                     | 423.7  | 59.1 | 1  | K.GVEAIEGSHIK.D                             |
| *             | HsH2AZ-FLAG_293_   | 3.8778 | 0.1472 | 1322.21 | 1322.458 | 6242.3  | 1                                                                     | 1669.7 | 85   | 2  | K.DNEQALYELVK.C                             |
| *             | HsH2AZ-FLAG_293_   | 5.1138 | 0.3119 | 1865.32 | 1865.96  | 7236.6  | 1                                                                     | 1935.1 | 82.1 | 4  | K.AAREELSVWTEEECR.N                         |
| *             | HsH2AZ-FLAG_293_   | 2.9008 | 0.2561 | 1085.23 | 1086.236 | 6003.9  | 1                                                                     | 864.8  | 75   | 2  | K.DFHLIQANK.V                               |
| *             | HsH2AZ-FLAG_293_   | 2.9176 | 0.106  | 1088.16 | 1086.236 | 6409.7  | 5                                                                     | 1047.6 | 81.2 | 1  | K.DFHLIQANK.V                               |
| *             | HsH2AZ-FLAG_293_   | 4.0661 | 0.2715 | 1393.31 | 1393.542 | 6190.6  | 1                                                                     | 1143.8 | 73.1 | 1  | K.VEGLHINGPTGGNK.K                          |
| gi 5031573 re | 3                  | 12     | 20.80% | 418     | 47371    | 5.9     | ARP3 actin-related protein 3 homolog [Homo sapiens]                   |        |      |    |                                             |
| *             | HsFLAG-ARP6_Ti_1   | 4.0823 | 0.2946 | 2193.16 | 2193.514 | 4185.3  | 1                                                                     | 865.3  | 60.5 | 5  | K.LGYAGNTEPQFIIPSCIAIK.E                    |
| *             | HsFLAG-Lin9_Ti_20  | 6.5406 | 0.4366 | 3060.52 | 3060.438 | 7570.3  | 1                                                                     | 2052.8 | 37.9 | 3  | R.TLTGTVIDSGDGVTHVIPVAEGYVIGSCIK.H          |
| *             | HsFLAG-Lin9_Ti_20  | 4.5798 | 0.3345 | 4317.93 | 4318.795 | 9845.5  | 1                                                                     | 1158.3 | 23.6 | 4  | R.FLGPPEIFFHPEFANPFDFTQPISEVVDEVIQNCPIDVR.R |
| gi 5453842 re | 4                  | 9      | 20.80% | 394     | 43813    | 6.6     | proliferation-associated 2G4, 38kDa [Homo sapiens]                    |        |      |    |                                             |
| *             | HsFLAG-p53-DNA-D   | 4.1323 | 0.3596 | 2348.57 | 2349.624 | 7920.6  | 1                                                                     | 904.9  | 50   | 1  | K.GIAFPTSISVNNVCVHFSPLK.S                   |



|             |                     |        |        |         |          |         |   |        |      |   |                                                                                                              |
|-------------|---------------------|--------|--------|---------|----------|---------|---|--------|------|---|--------------------------------------------------------------------------------------------------------------|
| *           | HsFLAG-Lin9_Ti_20   | 3.6711 | 0.3643 | 3239.76 | 3237.643 | 10497.3 | 1 | 1105.8 | 25.8 | 1 | K.IDLGVHVDGFIANVAHTFVVDVAQGTQVTGR.K                                                                          |
| *           | HsFLAG-Lin9_Ti_20   | 3.5101 | 0.356  | 1927.85 | 1928.155 | 6049.1  | 1 | 770.9  | 56.2 | 2 | R.LVKPGNQNTQVTEAWNK.V                                                                                        |
| *           | HsFLAG-p53-DNA-D    | 4.4101 | 0.2686 | 1630.99 | 1630.884 | 5271.7  | 1 | 1227.9 | 83.3 | 5 | K.HELLQPFNVLYEK.E                                                                                            |
| gi 14702171 |                     | 3      | 9      | 20.70%  | 275      | 31441   |   |        |      |   | 4.9 PolII_Rpb3 {DNA directed RNA polymerase II polypeptide C; polymerase (RNA) II (DNA directed) polypeptide |
| gi 14702173 |                     | 3      | 9      | 20.70%  | 275      | 31441   |   |        |      |   | 4.9 PolII_Rpb3 {DNA directed RNA polymerase II polypeptide C; polymerase (RNA) II (DNA directed) polypeptide |
|             | HsFlag-NUFIP_Ti_1C  | 3.6888 | 0.2507 | 1511.58 | 1511.799 | 2757.5  | 1 | 577.4  | 76.9 | 4 | R.LGLIPLISDDIVDK.L                                                                                           |
|             | HsFLAG-p53-DNA-D    | 2.6792 | 0.2839 | 2038.84 | 2037.196 | 9328.4  | 1 | 684.8  | 47.1 | 1 | K.WNPAGVAFAEYDPDNALR.H                                                                                       |
|             | HsSrcap_Ti_204.422  | 4.9448 | 0.2903 | 2804.65 | 2805.166 | 7512.4  | 1 | 1314   | 33.3 | 4 | R.FYYNVESCGSLRPETIVLSALSGLK.K                                                                                |
| gi 38488718 |                     | 14     | 39     | 20.60%  | 878      | 98172   |   |        |      |   | 8.2 hypothetical protein LOC54891 [Homo sapiens]                                                             |
| *           | HsFLAG-ARP5_Ti_1    | 3.8602 | 0.3035 | 2158.45 | 2159.372 | 7441.5  | 1 | 528    | 44.1 | 2 | K.HIHFSEVDNKPLCSYSPK.L                                                                                       |
| *           | Hs293Flag-les2_Ti_1 | 4.0867 | 0.3439 | 1676.83 | 1676.922 | 5301    | 1 | 931    | 69.2 | 1 | R.YCNHLQVLGFIPK.K                                                                                            |
| *           | HsFLAG-ARP5_Ti_1    | 4.6532 | 0.2797 | 3007.95 | 3008.265 | 9318.4  | 1 | 1288.8 | 32.3 | 3 | R.VPLHYLETELEDPFAFNEEDDLKK.G                                                                                 |
| *           | HsFLAG-FLJ20309_    | 6.6047 | 0.3514 | 2632.49 | 2632.954 | 5992.6  | 1 | 1224.3 | 38.5 | 4 | K.SPQPQNTSLPMQGVAPTTHIAQAR.Q                                                                                 |
| *           | Hs293Flag-les2_Ti_1 | 3.5053 | 0.3054 | 1136.16 | 1136.383 | 4150.3  | 1 | 912.2  | 94.4 | 5 | K.RPLPLLSSR.A                                                                                                |
| *           | HsFLAG-ARP8_Ti_2    | 3.7844 | 0.3156 | 1483.26 | 1481.617 | 5278.8  | 1 | 629.1  | 66.7 | 7 | K.ATAFSPHFSCISR.L                                                                                            |
| *           | HsFLAG-ARP5_Ti_1    | 4.0309 | 0.2997 | 2484.86 | 2484.822 | 9850.2  | 1 | 1072.2 | 33.3 | 1 | R.KALLQAASKEPECTGQLIQELR.R                                                                                   |
| *           | HsFLAG-FLJ20309_    | 4.4145 | 0.3691 | 2354.58 | 2356.648 | 12141.7 | 1 | 1626.6 | 36.2 | 2 | K.ALLQAASKEPECTGQLIQELR.R                                                                                    |
| *           | HsFLAG-FLJ20309_    | 4.0495 | 0.3242 | 2355.76 | 2356.648 | 5244    | 1 | 327.6  | 42.5 | 1 | K.ALLQAASKEPECTGQLIQELR.R                                                                                    |
| *           | HsFLAG-FLJ20309_    | 3.5915 | 0.1157 | 1575.41 | 1573.709 | 6544    | 2 | 902.4  | 70.8 | 1 | K.EPECTGQLIQELR.R                                                                                            |
| *           | HsFLAG-FLJ20309_    | 4.5015 | 0.3045 | 1517.17 | 1517.689 | 5412.3  | 1 | 1236.4 | 76.9 | 6 | K.LREVEPAACSGTVK.G                                                                                           |
| *           | HsFLAG-FLJ20309_    | 3.0964 | 0.215  | 1248.41 | 1248.342 | 5216.6  | 4 | 535    | 63.6 | 1 | R.EVEPAACSGTVK.G                                                                                             |
| *           | HsFLAG-FLJ20309_    | 4.3856 | 0.2249 | 3016.04 | 3016.226 | 7859.4  | 1 | 762    | 29   | 2 | K.FADGQQCSVPVFDITHQTPLCEEHAK.K                                                                               |
| *           | HsFLAG-ARP5_Ti_1    | 3.7649 | 0.387  | 1685.98 | 1686.815 | 7917    | 1 | 1303.5 | 73.1 | 3 | R.LPDDLQDFDFEFGK.N                                                                                           |
| gi 4505895  |                     | 6      | 16     | 20.60%  | 514      | 57194   |   |        |      |   | 9.2 pleiotropic regulator 1 (PRL1 homolog, Arabidopsis) [Homo sapiens]                                       |
| *           | HsFlag-NUFIP_Ti_2C  | 3.5707 | 0.2244 | 2525    | 2523.783 | 8117.6  | 1 | 948.8  | 33.3 | 1 | K.RTHDMFVADNGKPVPLDEESHK.R                                                                                   |
| *           | HsFlag-NUFIP_Ti_2C  | 3.6807 | 0.237  | 1473.96 | 1473.687 | 7506.5  | 1 | 858.4  | 62.5 | 2 | R.NEYGPVLMPTSK.E                                                                                             |
| *           | HsFlag-VPS71_Ti_1C  | 3.343  | 0.23   | 1317.26 | 1317.401 | 7145.3  | 1 | 912    | 68.2 | 3 | K.GPQNATDSYVHK.Q                                                                                             |
| *           | HsFLAG-ARP6_Ti_1    | 3.8371 | 0.4074 | 1942.65 | 1943.266 | 10000.5 | 1 | 1467.6 | 58.3 | 3 | R.MPSESAAQSLAVALPLQTK.A                                                                                      |
| *           | HsFLAG-p53-DNA-D    | 3.8604 | 0.3599 | 1436.85 | 1437.552 | 5475.8  | 1 | 1127.8 | 79.2 | 5 | R.HYTFASGSPDNIK.Q                                                                                            |
| *           | HsFlag-NUFIP_Ti_2C  | 5.3795 | 0.4265 | 2866.38 | 2867.024 | 9658.7  | 1 | 1102.1 | 28.8 | 2 | R.VHAAVQPGSLDSESGIFACAFDQSES.R.L                                                                             |
| gi 7706322  |                     | 3      | 6      | 20.50%  | 244      | 28068   |   |        |      |   | 6.7 chromosome 14 open reading frame 166 [Homo sapiens]                                                      |
| *           | HsFLAG-p53-DNA-D    | 3.1266 | 0.2368 | 1813.76 | 1814.005 | 8958.1  | 1 | 720.8  | 53.3 | 2 | K.NAEPLINLDVNNPDFK.A                                                                                         |
| *           | HsFLAG-p53-DNA-D    | 4.2964 | 0.242  | 1498.53 | 1498.827 | 6441.6  | 1 | 1515.8 | 73.1 | 2 | K.AGVMALANLLQIQR.H                                                                                           |
| *           | HsFLAG-FLJ20729_    | 3.4462 | 0.3064 | 2153.97 | 2154.431 | 8325    | 1 | 773.7  | 47.4 | 2 | K.HILGFDTGDAVLNAAQILR.L                                                                                      |
| gi 4506713  |                     | 2      | 13     | 20.50%  | 156      | 17965   |   |        |      |   | 9.6 ubiquitin and ribosomal protein S27a precursor [Homo sapiens]                                            |
| gi 88952640 |                     | 2      | 13     | 20.50%  | 156      | 17967   |   |        |      |   | 9.5 PREDICTED: similar to ubiquitin and ribosomal protein S27a precursor [Homo sapiens]                      |
| gi 88943644 |                     | 2      | 13     | 20.50%  | 156      | 17967   |   |        |      |   | 9.5 PREDICTED: similar to ubiquitin and ribosomal protein S27a precursor [Homo sapiens]                      |
|             | HsFLAG-ARP6_Ti_1    | 3.7329 | 0.5119 | 2171.87 | 2173.25  | 8988.6  | 1 | 1026.7 | 52.8 | 9 | R.ECPSDECGAGVFMASHFDR.H                                                                                      |
|             | HsFlag-NUFIP_Ti_1C  | 4.3192 | 0.3503 | 1736.56 | 1735.829 | 8161.8  | 1 | 1281.1 | 70.8 | 4 | K.CCLTYCFNKPEDK.-                                                                                            |
| gi 24430155 |                     | 4      | 7      | 20.40%  | 387      | 43508   |   |        |      |   | 5.3 proteasome 26S ATPase subunit 4 isoform 2 [Homo sapiens]                                                 |
| gi 5729991  |                     | 4      | 7      | 18.90%  | 418      | 47366   |   |        |      |   | 5.2 proteasome 26S ATPase subunit 4 isoform 1 [Homo sapiens]                                                 |
|             | HsFlag-VPS71_Ti_1C  | 5.0933 | 0.3298 | 3632.48 | 3631.975 | 4176    | 1 | 406.1  | 25   | 3 | K.AQDEIPALSVSRPQTGLSFLGPEPEDLEDLYSR.Y                                                                        |
|             | HsFlag-FLJ90652_2   | 3.2742 | 0.1407 | 937.48  | 937.087  | 7372.2  | 1 | 1426   | 93.8 | 1 | K.PNASVALHK.H                                                                                                |

|               |                    |        |        |         |          |                                                              |   |        |      |    |                                        |
|---------------|--------------------|--------|--------|---------|----------|--------------------------------------------------------------|---|--------|------|----|----------------------------------------|
|               | HsFLAG-ARP6_Ti_1   | 3.2119 | 0.259  | 1944.94 | 1945.22  | 6809.3                                                       | 1 | 567    | 52.9 | 2  | K.ENAPAIIFIDEIDAIATK.R                 |
|               | HsFLAG-ARP6_Ti_1   | 3.2781 | 0.26   | 2204.73 | 2204.546 | 9235.4                                                       | 1 | 655.1  | 44.4 | 1  | R.ILLELLNQMDGFDQNVNVK.V                |
| gi 38569503 r | 6                  | 16     | 20.20% | 491     | 55217    | 9.7 ATP-dependent RNA helicase ROK1 isoform b [Homo sapiens] |   |        |      |    |                                        |
| gi 38569505 r | 6                  | 16     | 16.50% | 599     | 67498    | 9.7 ATP-dependent RNA helicase ROK1 isoform a [Homo sapiens] |   |        |      |    |                                        |
|               | HsFLAG-Lin9_Ti_20  | 5.9566 | 0.4572 | 2656.77 | 2657.94  | 9957.7                                                       | 1 | 1853.6 | 37.5 | 2  | K.IHVQGTDLDPDIATFQQLDQEYK.I            |
|               | HsARP6-FLAG_Ti_1   | 3.0485 | 0.1279 | 1474.47 | 1475.873 | 4974.9                                                       | 1 | 772.8  | 66.7 | 2  | K.TLAFSIPILMQLK.Q                      |
|               | HsFLAG-Lin9_Ti_20  | 3.4674 | 0.2361 | 1304.5  | 1304.532 | 6748.3                                                       | 5 | 1107   | 75   | 2  | K.KFDILVTPNR.L                         |
|               | HsFLAG-FLJ20309_   | 3.4778 | 0.374  | 2137.59 | 2138.336 | 8599.5                                                       | 1 | 622.1  | 44.7 | 1  | R.NSAVETVEQELLFVGSETGK.L               |
|               | HsFLAG-p53-DNA-D   | 4.1982 | 0.4386 | 1666.71 | 1666.915 | 8405.4                                                       | 1 | 1182.5 | 65.4 | 6  | K.AITFFTEDDKPLLR.S                     |
|               | HsFLAG-Lin9_Ti_20  | 4.6278 | 0.4202 | 1972.88 | 1974.23  | 7097.1                                                       | 1 | 1319.2 | 64.7 | 3  | R.SVANVIQQAGCPVEYIK.G                  |
| gi 31543831 r | 5                  | 7      | 20.20% | 451     | 51170    | 6.1 tubulin, gamma 1 [Homo sapiens]                          |   |        |      |    |                                        |
|               | HsFLAG-Lin9_Ti_20  | 3.2054 | 0.2966 | 1341.54 | 1342.581 | 6542.8                                                       | 1 | 626.6  | 63.6 | 2  | R.VIHSILNSPYAK.L                       |
|               | HsFLAG-ARP6_Ti_1   | 3.305  | 0.2505 | 1343.14 | 1342.581 | 7834                                                         | 3 | 944.7  | 68.2 | 2  | R.VIHSILNSPYAK.L                       |
|               | HsFLAG-Lin9_Ti_20  | 4.7909 | 0.4138 | 3256.62 | 3256.473 | 9755.1                                                       | 1 | 1039.3 | 25.8 | 1  | R.EADGSDSLEGFVLCHSIAGGTGSGGLGSYLLER.L  |
|               | HsSrcap_Ti_205.297 | 5.1965 | 0.4868 | 2338.53 | 2338.684 | 6263.4                                                       | 1 | 1314   | 55   | 1  | R.LHFLMTGYTPLTTDQSVASVR.K              |
|               | HsFLAG-Lin9_Ti_20  | 4.0816 | 0.233  | 3093.1  | 3092.348 | 9244                                                         | 6 | 629.7  | 25   | 1  | R.EIVQQQLIDEYHAATRPDYISWGTQEQ.-        |
| gi 15147219 r | 2                  | 3      | 20.20% | 312     | 33241    | 5.4 purine-rich element binding protein B [Homo sapiens]     |   |        |      |    |                                        |
| *             | HsFlag-NUFIP_Ti_1C | 5.2958 | 0.3298 | 3257.48 | 3257.454 | 9290                                                         | 1 | 1821.7 | 31.5 | 1  | R.DSLGDFIEHYAQLGPSSPEQLAAGAEEGGPR.R    |
| *             | HsFlag-NUFIP_Ti_1C | 3.5189 | 0.2767 | 2869.08 | 2869.209 | 6110.5                                                       | 1 | 473.2  | 33.3 | 2  | R.GGGGFAGPGPGGLQSGQTIALPAQGLIEFR.D     |
| gi 4506697 re | 7                  | 32     | 20.20% | 119     | 13373    | 9.9 ribosomal protein S20 [Homo sapiens]                     |   |        |      |    |                                        |
| *             | HsFlag-NUFIP_Ti_1C | 2.2873 | 0.1463 | 1247.65 | 1248.425 | 3431.7                                                       | 2 | 263.3  | 60   | 2  | K.TPVEPEVAIHR.I                        |
| *             | HsFlag-NUFIP_Ti_1C | 3.7125 | 0.2652 | 1248.28 | 1248.425 | 5086.8                                                       | 1 | 1353.4 | 90   | 8  | K.TPVEPEVAIHR.I                        |
| *             | HsFlag-NUFIP_Ti_1C | 4.336  | 0.234  | 1248.75 | 1248.425 | 7182.7                                                       | 1 | 2541.2 | 67.5 | 1  | K.TPVEPEVAIHR.I                        |
| *             | HsFlag-NUFIP_Ti_11 | 3.1041 | 0.2467 | 1507.75 | 1507.773 | 4287.3                                                       | 1 | 410.9  | 62.5 | 2  | K.RLIDLHSPSEIVK.Q                      |
| *             | HsFlag-NUFIP_Ti_11 | 3.9451 | 0.3339 | 1507.86 | 1507.773 | 7838                                                         | 1 | 1154.9 | 75   | 10 | K.RLIDLHSPSEIVK.Q                      |
| *             | HsFlag-NUFIP_Ti_1C | 3.9537 | 0.2723 | 1351.31 | 1351.586 | 7015.9                                                       | 1 | 1088.4 | 77.3 | 4  | R.LIDLHSPSEIVK.Q                       |
| *             | HsFlag-NUFIP_Ti_1C | 3.0778 | 0.2821 | 1351.57 | 1351.586 | 6212.5                                                       | 1 | 620.4  | 59.1 | 5  | R.LIDLHSPSEIVK.Q                       |
| gi 4504431 re | 1                  | 4      | 20.20% | 109     | 11832    | 10.6 high mobility group AT-hook 2 isoform a [Homo sapiens]  |   |        |      |    |                                        |
| gi 62912484 r | 1                  | 4      | 23.90% | 92      | 10063    | 11.9 high mobility group AT-hook 2 isoform c [Homo sapiens]  |   |        |      |    |                                        |
| gi 62912482 r | 1                  | 4      | 20.80% | 106     | 11456    | 12 high mobility group AT-hook 2 isoform b [Homo sapiens]    |   |        |      |    |                                        |
|               | HsFLAG-ARP6_Ti_1   | 4.7545 | 0.3628 | 2036.58 | 2036.166 | 6046.6                                                       | 1 | 1085.5 | 57.1 | 4  | R.GEGAGQPSTSAQQQPAAPAPQK.R             |
| gi 54112121 r | 15                 | 82     | 20.10% | 1217    | 135577   | 5.3 splicing factor 3b, subunit 3 [Homo sapiens]             |   |        |      |    |                                        |
| *             | HsFLAG-p53-DNA-D   | 2.5683 | 0.1839 | 959.34  | 960.078  | 6034                                                         | 1 | 501.2  | 71.4 | 4  | K.IHQETFGK.S                           |
| *             | HsARP6-FLAG_Ti_1   | 2.9235 | 0.2375 | 1196.54 | 1196.389 | 6632.5                                                       | 2 | 719.2  | 70   | 2  | R.LTISSPLEAHK.A                        |
| *             | HsFLAG-ARP6_Ti_2   | 4.2724 | 0.1837 | 1304.38 | 1304.532 | 5511.5                                                       | 1 | 1569.9 | 86.4 | 13 | R.FLAVGLVDNTR.I                        |
| *             | HsARP6-FLAG_Ti_1   | 3.6245 | 0.3358 | 1489.09 | 1489.623 | 5319.4                                                       | 1 | 1118.9 | 76.9 | 2  | R.TVLDPVTGDLSDTR.T                     |
| *             | HsFLAG-Lin9_Ti_20  | 4.6583 | 0.2577 | 3886.67 | 3888.289 | 8002.9                                                       | 1 | 623.5  | 22.1 | 1  | R.FHLTPLSYETLEFASGFASEQCPEGIVAISTNTR.I |
| *             | HsFlag-NUFIP_Ti_1C | 4.8307 | 0.4397 | 1921.74 | 1922.237 | 6168.2                                                       | 1 | 955    | 59.4 | 17 | K.LGAVFNQVAFPLQYTPR.K                  |
| *             | HsFLAG-p53-DNA-D   | 4.7603 | 0.2803 | 2998.18 | 2999.35  | 5802.8                                                       | 1 | 932.4  | 34   | 1  | R.KFVIHPESNNLIIETDHNAYTEATK.A          |
| *             | HsFlag-VPS71_Ti_1C | 5.9777 | 0.3355 | 2871.56 | 2871.176 | 4722.4                                                       | 1 | 1148.7 | 38.5 | 6  | K.FVIHPESNNLIIETDHNAYTEATK.A           |
| *             | HsFlag-VPS71_Ti_1C | 5.9559 | 0.4701 | 2535.09 | 2534.887 | 6087.6                                                       | 1 | 1179.8 | 52.2 | 9  | R.ELAAEMAAFLNENLPESIFGAPK.A            |
| *             | HsFLAG-FLJ20729_   | 3.767  | 0.4333 | 1786.27 | 1785.994 | 10366.2                                                      | 1 | 1130   | 56.7 | 2  | R.FSNTGEDWYVLVGVAK.D                   |
| *             | HsFLAG-UTX1_Ti_2   | 4.6572 | 0.4099 | 1683.65 | 1682.917 | 3625.5                                                       | 1 | 949.5  | 76.7 | 18 | K.TPVEEVPAIAPFQGR.V                    |

|                |                    |        |        |         |          |                                                          |   |        |      |                                               |
|----------------|--------------------|--------|--------|---------|----------|----------------------------------------------------------|---|--------|------|-----------------------------------------------|
| *              | HsFlag-NUFIP_Ti_11 | 5.2998 | 0.4298 | 1680.51 | 1680.907 | 6166.9                                                   | 1 | 2609.2 | 92.9 | 1 K.HIANYISGIQTIGHR.V                         |
| *              | HsFlag-VPS71_Ti_10 | 3.7027 | 0.33   | 1927.02 | 1927.118 | 5889.1                                                   | 1 | 987.2  | 58.8 | 1 R.WVTASLLDYDTVAGADK.F                       |
| *              | HsFLAG-ARP6_Ti_1   | 3.2    | 0.3271 | 2110.14 | 2111.254 | 9813.8                                                   | 1 | 531.1  | 47.1 | 1 K.NVIDGDLCEQFNSMEPNK.Q                      |
| *              | HsFLAG-UTX1_Ti_20  | 4.0555 | 0.2707 | 1700.22 | 1700.843 | 8037                                                     | 1 | 1613.4 | 71.4 | 4 K.NVSEELDRTPPEVSK.K                         |
| gij 31881687 r | 4                  | 11     | 20.10% | 363     | 39682    | 8 replication factor C 4 [Homo sapiens]                  |   |        |      |                                               |
| gij 4506491 re | 4                  | 11     | 20.10% | 363     | 39682    | 8 replication factor C 4 [Homo sapiens]                  |   |        |      |                                               |
|                | HsFlag-DPCD_Ti_20  | 3.0867 | 0.1338 | 1229.83 | 1230.447 | 7354.2                                                   | 1 | 1108.5 | 72.7 | 2 K.GTSISTKPPLTK.D                            |
|                | HsFlag-VPS71_Ti_10 | 4.8002 | 0.3743 | 2047.86 | 2047.315 | 4999.8                                                   | 1 | 852.4  | 55.3 | 4 K.SLEGADLPNLLFYGPPGTGK.T                    |
|                | HsFLAG-Lin9_Ti_20  | 3.6369 | 0.297  | 1326.36 | 1326.576 | 6153.7                                                   | 2 | 1252   | 75   | 1 K.VITDIAGVIPAEK.I                           |
|                | HsFLAG-p53-DNA-D   | 5.2275 | 0.4047 | 3088.32 | 3088.358 | 8734.5                                                   | 1 | 1252.6 | 31.5 | 4 K.DLIDEGHAATQLVNQLHDVVVENNLSDK.Q            |
| gij 4557032 re | 5                  | 6      | 20.10% | 334     | 36639    | 6.1 lactate dehydrogenase B [Homo sapiens]               |   |        |      |                                               |
| *              | HsFLAG-ARP6_Ti_1   | 4.3674 | 0.4121 | 1631.21 | 1630.833 | 7588.4                                                   | 1 | 1534.4 | 71.4 | 1 K.SLADELALVDVLEDK.L                         |
|                | HsFlag-VPS71_Ti_10 | 3.4513 | 0.3412 | 1249.89 | 1249.332 | 4382.8                                                   | 1 | 752.9  | 77.3 | 2 R.VIGSGCNLDSAR.F                            |
| *              | HsFLAG-ARP6_Ti_1   | 1.8333 | 0.2619 | 1012.23 | 1012.255 | 3583.5                                                   | 1 | 392.7  | 68.8 | 1 R.IHPVSTMVK.G                               |
| *              | HsFLAG-ARP6_Ti_1   | 3.0858 | 0.1392 | 2298.16 | 2297.64  | 8875.9                                                   | 1 | 653.3  | 42.1 | 1 K.GMYGIENEVFLSLPCILNAR.G                    |
| *              | HsFLAG-Lin9_Ti_20  | 2.9677 | 0.1146 | 1287.42 | 1287.499 | 8547.9                                                   | 3 | 1137.7 | 80   | 1 K.LKDDEVAQLKK.S                             |
| gij 20149643 r | 8                  | 25     | 20.00% | 470     | 53846    | 5.9 hypothetical protein LOC54680 [Homo sapiens]         |   |        |      |                                               |
| *              | HsFLAG-TIP49a_Ti_  | 3.6345 | 0.281  | 1226.62 | 1226.335 | 5667.8                                                   | 1 | 1153.9 | 79.2 | 3 K.SGGGLHSVAEGVR.L                           |
| *              | HsFLAG-TIP49a_Ti_  | 3.1253 | 0.2384 | 2012.72 | 2013.214 | 6182.3                                                   | 1 | 473.8  | 50   | 1 R.LAGQWVEQEVEDRPEVK.D                       |
| *              | HsFLAG-TIP49a_Ti_  | 5.2489 | 0.3088 | 3068.07 | 3068.367 | 7085.5                                                   | 9 | 619.4  | 26   | 3 R.LAGQWVEQEVEDRPEVKDENAGVLEVK.Q             |
| *              | HsFLAG-TIP49a_Ti_  | 3.8375 | 0.3091 | 1605.52 | 1604.813 | 4108.4                                                   | 1 | 818.9  | 76.9 | 5 K.VKEEPPINHPVGCK.R                          |
| *              | HsFLAG-TIP49a_Ti_  | 3.6575 | 0.2552 | 1581.76 | 1581.766 | 4638.4                                                   | 1 | 1167.4 | 83.3 | 1 K.LQFPQSQAEYIEK.R                           |
| *              | HsFlag-NUFIP_Ti_20 | 3.606  | 0.2622 | 1674.47 | 1673.947 | 5897.3                                                   | 1 | 1108.7 | 73.1 | 7 K.TINEILKPYIDPEK.S                          |
| *              | HsFLAG-TIP49a_Ti_  | 2.7575 | 0.1632 | 1524.47 | 1524.887 | 5222.2                                                   | 2 | 528.1  | 54.2 | 3 K.VIIEYPTLHVVLK.G                           |
| *              | HsFLAG-TIP49a_Ti_  | 3.2453 | 0.2331 | 1524.64 | 1524.887 | 4240.4                                                   | 1 | 964.5  | 79.2 | 2 K.VIIEYPTLHVVLK.G                           |
| gij 4557491 re | 3                  | 6      | 20.00% | 431     | 48358    | 6.6 cleavage stimulation factor subunit 1 [Homo sapiens] |   |        |      |                                               |
| gij 75709220 r | 3                  | 6      | 20.00% | 431     | 48358    | 6.6 cleavage stimulation factor subunit 1 [Homo sapiens] |   |        |      |                                               |
| gij 75709217 r | 3                  | 6      | 20.00% | 431     | 48358    | 6.6 cleavage stimulation factor subunit 1 [Homo sapiens] |   |        |      |                                               |
|                | HsFLAG-Lin9_Ti_20  | 5.0614 | 0.4014 | 4366.41 | 4367.095 | 8348.7                                                   | 1 | 838.9  | 23   | 2 K.LIISQLLYDGYISIANGLINEIKPQSVCAPSEQLLHLIK.L |
|                | HsFlag-VPS71_Ti_10 | 4.7282 | 0.3282 | 2961.31 | 2961.224 | 5669.8                                                   | 1 | 931.7  | 32   | 2 R.TLYDHVDEVTCLAFHPTEQILASGSR.D              |
|                | HsFLAG-p53-DNA-D   | 5.2043 | 0.473  | 2310.03 | 2310.618 | 6630.7                                                   | 1 | 1520.7 | 62.5 | 2 R.SISFHPSGDFILVGTQHPTLR.L                   |
| gij 21704261 r | 2                  | 3      | 20.00% | 160     | 18275    | 6.3 MAX protein isoform a [Homo sapiens]                 |   |        |      |                                               |
| gij 21704263 r | 2                  | 3      | 21.20% | 151     | 17202    | 6.5 MAX protein isoform b [Homo sapiens]                 |   |        |      |                                               |
|                | HsFlag-NUFIP_Ti_20 | 3.7095 | 0.1937 | 1357.01 | 1355.54  | 7836.6                                                   | 1 | 1319.4 | 80   | 2 K.RQNALLEQQVR.A                             |
|                | HsFLAG-Lin9_Ti_20  | 2.9508 | 0.3098 | 2289.99 | 2290.405 | 6338.9                                                   | 1 | 420.6  | 40   | 1 R.SSAQLQTNYPSSDNSLYTNAK.G                   |
| gij 16117794 r | 3                  | 5      | 20.00% | 105     | 12254    | 11.6 ribosomal protein L36 [Homo sapiens]                |   |        |      |                                               |
| gij 16117796 r | 3                  | 5      | 20.00% | 105     | 12254    | 11.6 ribosomal protein L36 [Homo sapiens]                |   |        |      |                                               |
|                | HsVPS71-FLAG_Ti_   | 2.0229 | 0.1047 | 992.53  | 993.209  | 3768.5                                                   | 3 | 375.4  | 68.8 | 2 R.YPMAVGLNK.G                               |
|                | HsFLAG-ARP6_Ti_1   | 3.8143 | 0.3767 | 1389.88 | 1389.613 | 6002.7                                                   | 1 | 811    | 72.7 | 2 K.REELSNVLAAMR.K                            |
|                | HsFLAG-ARP6_Ti_1   | 2.7247 | 0.1941 | 1233.48 | 1233.425 | 6213                                                     | 1 | 806.1  | 75   | 1 R.EELSNVLAAMR.K                             |
| gij 16753225 r | 5                  | 32     | 19.90% | 216     | 23503    | 10.9 ribosomal protein L14 [Homo sapiens]                |   |        |      |                                               |
|                | HsFLAG-ARP6_Ti_1   | 2.7312 | 0.2694 | 1232.42 | 1233.412 | 5953.7                                                   | 1 | 613.7  | 63.6 | 4 R.VAYVSFGPHAGK.L                            |
|                | HsFLAG-ARP6_Ti_1   | 3.5293 | 0.3627 | 1233.18 | 1233.412 | 5200.2                                                   | 1 | 903.9  | 77.3 | 4 R.VAYVSFGPHAGK.L                            |

|                |                    |        |        |         |          |                                                                          |   |        |      |    |                                  |
|----------------|--------------------|--------|--------|---------|----------|--------------------------------------------------------------------------|---|--------|------|----|----------------------------------|
|                | HsFLAG-ARP6_Ti_1   | 4.7851 | 0.2923 | 1355.35 | 1355.577 | 8307.7                                                                   | 1 | 2317.2 | 86.4 | 21 | K.LVAIVDVIDQNR.A                 |
|                | HsFLAG-Lin9_Ti_20  | 3.2918 | 0.3123 | 1217.15 | 1216.346 | 6769.9                                                                   | 1 | 936    | 75   | 2  | R.ALVDGPCTQVR.R                  |
| *              | HsFLAG-p53-DNA-D   | 1.8314 | 0.0896 | 951.48  | 952.06   | 3864.9                                                                   | 4 | 355.6  | 64.3 | 1  | K.FPHSAHQK.Y                     |
| gij 31542319 r | 4                  | 8      | 19.80% | 308     | 34482    | 5.1 epsilon subunit of coatomer protein complex isoform a [Homo sapiens] |   |        |      |    |                                  |
| gij 40805825 r | 4                  | 8      | 23.70% | 257     | 28797    | 5.3 epsilon subunit of coatomer protein complex isoform b [Homo sapiens] |   |        |      |    |                                  |
|                | HsSrcap_Ti_203.253 | 4.3121 | 0.1862 | 2155.65 | 2156.487 | 4024.6                                                                   | 1 | 466.6  | 47.4 | 2  | K.FGVVLDEIKPSSAPELQAVR.M         |
|                | HsSrcap_Ti_203.253 | 5.913  | 0.3301 | 2156.85 | 2156.487 | 7373.6                                                                   | 1 | 1820.5 | 44.7 | 4  | K.FGVVLDEIKPSSAPELQAVR.M         |
|                | HsFlag-VPS71_Ti_1  | 3.679  | 0.2498 | 1574.19 | 1573.743 | 6253.7                                                                   | 2 | 835.2  | 65.4 | 1  | R.WEAAEGLLQEALDK.D               |
|                | HsSrcap_Ti_204.404 | 3.5584 | 0.2792 | 2980.12 | 2978.375 | 3222.7                                                                   | 8 | 229.4  | 26.9 | 1  | K.DSGYPETLVNLIVLSQHLGKPPPEVTNR.Y |
| gij 5174745 re | 2                  | 16     | 19.80% | 91      | 10755    | 4.4 ubiquinol-cytochrome c reductase hinge protein [Homo sapiens]        |   |        |      |    |                                  |
| *              | HsSrcap_Ti_204.306 | 5.3125 | 0.3864 | 2236.88 | 2237.31  | 6994.1                                                                   | 1 | 1285.5 | 45.6 | 8  | R.SHTEEDCTEELDFDLHAR.D           |
| *              | HsSrcap_Ti_206.282 | 6.3792 | 0.4489 | 2238.37 | 2237.31  | 9828.9                                                                   | 1 | 2550.7 | 70.6 | 8  | R.SHTEEDCTEELDFDLHAR.D           |
| gij 19913406 r | 20                 | 67     | 19.70% | 1531    | 174384   | 8.7 DNA topoisomerase II, alpha isozyrne [Homo sapiens]                  |   |        |      |    |                                  |
|                | HsFLAG-Lin9_Ti_20  | 3.9805 | 0.1768 | 1462.4  | 1462.643 | 8120.4                                                                   | 1 | 1780.5 | 79.2 | 3  | K.IFDEILVNAADNK.Q                |
| *              | HsFLAG-Lin9_Ti_20  | 4.6434 | 0.3723 | 1927.47 | 1928.152 | 6897                                                                     | 1 | 1066.2 | 62.5 | 9  | R.VTIDPENNLISIWNGK.G             |
|                | HsFLAG-FLJ20729_   | 2.6641 | 0.3413 | 1234.61 | 1235.469 | 4339                                                                     | 5 | 421.9  | 70   | 1  | K.GIPVVEHKVEK.M                  |
| *              | HsFLAG-p53-DNA-D   | 5.8809 | 0.454  | 2519.43 | 2520.813 | 9032.2                                                                   | 1 | 1630.3 | 54.8 | 7  | K.MYVPALIFGQLLTSSNYDDDEK.K       |
| *              | HsFLAG-FLJ20729_   | 4.6343 | 0.3758 | 2519.72 | 2520.813 | 9413.1                                                                   | 1 | 1721.5 | 38.1 | 1  | K.MYVPALIFGQLLTSSNYDDDEK.K       |
| *              | HsFLAG-p53-DNA-D   | 3.9644 | 0.3189 | 1082.41 | 1082.202 | 7747.9                                                                   | 1 | 1528   | 88.9 | 2  | R.RAYDIAGSTK.D                   |
| *              | HsFLAG-FLJ20309_   | 2.6583 | 0.1129 | 1132.31 | 1132.267 | 4889.7                                                                   | 1 | 679.5  | 81.2 | 1  | K.VIHEQVNR.W                     |
| *              | HsFLAG-Lin9_Ti_20  | 4.1093 | 0.4761 | 1627.54 | 1627.838 | 5708.5                                                                   | 1 | 1051.3 | 67.9 | 2  | K.GFQQISFVNSIATSK.G              |
| *              | HsFLAG-Lin9_Ti_20  | 5.2859 | 0.4513 | 1730.12 | 1731.011 | 8014.9                                                                   | 1 | 1508.1 | 66.7 | 12 | K.AAIGCGIVESILNWVK.F             |
|                | HsFLAG-p53-DNA-D   | 3.7293 | 0.2984 | 1336.52 | 1336.614 | 7630.8                                                                   | 1 | 1623.8 | 85   | 2  | R.FLEEFITPIVK.V                  |
| *              | HsFLAG-p53-DNA-D   | 3.5972 | 0.3503 | 2176.38 | 2177.436 | 8428.3                                                                   | 1 | 862    | 53.1 | 1  | K.NKQEMAFYSLPEFEWV.K.S           |
| *              | HsFLAG-FLJ20729_   | 3.6398 | 0.3669 | 1672.42 | 1671.801 | 8452.5                                                                   | 1 | 1345.1 | 63.3 | 2  | K.YSGPEDDAAISLAFSK.K             |
| *              | HsFLAG-Lin9_Ti_20  | 3.683  | 0.3138 | 2956.41 | 2957.306 | 6943.5                                                                   | 1 | 624    | 35.4 | 2  | K.LLGLPEDYLYGQTTTTYLYNDFINK.E    |
| *              | HsFLAG-p53-DNA-D   | 3.8889 | 0.4031 | 1301.47 | 1302.574 | 7336                                                                     | 1 | 1543.7 | 85   | 1  | R.YIFTMLSSLAR.L                  |
| *              | HsFLAG-FLJ20729_   | 3.8677 | 0.3385 | 2764.73 | 2765.107 | 8593.3                                                                   | 1 | 837.4  | 39.1 | 4  | K.SDSVTDGPTFNLYLLDMLPLWYLT.K.E   |
| *              | HsFLAG-p53-DNA-D   | 4.9227 | 0.3837 | 2620.83 | 2621.901 | 8951                                                                     | 1 | 1098   | 45.5 | 5  | K.SPSDLWKEDLATFIEELEAVEAK.E      |
| *              | HsFLAG-FLJ20309_   | 4.021  | 0.3073 | 1807.69 | 1807.992 | 9769.3                                                                   | 1 | 1945.4 | 70   | 2  | K.EDLATFIEELEAVEAK.E             |
| *              | HsFLAG-Lin9_Ti_20  | 4.4745 | 0.4195 | 2044.79 | 2046.109 | 5318.2                                                                   | 1 | 888.4  | 61.1 | 1  | K.NENTEGSPQEDGVELEGLK.Q          |
| *              | HsFLAG-p53-DNA-D   | 3.2949 | 0.4441 | 2704.62 | 2705.981 | 9352.6                                                                   | 1 | 509.2  | 34   | 1  | K.GSVPLSSPPATHFPDETEITNPVVK.K    |
| *              | HsFLAG-p53-DNA-D   | 4.2004 | 0.3499 | 1780.63 | 1780.979 | 5936.8                                                                   | 1 | 956.8  | 65.6 | 8  | K.RDPALNSGVSQKPDPAK.T            |
| gij 4507677 re | 13                 | 43     | 19.70% | 803     | 92469    | 4.8 tumor rejection antigen (gp96) 1 [Homo sapiens]                      |   |        |      |    |                                  |
|                | HsFlag-VPS71_Ti_1  | 2.6074 | 0.2479 | 1275.61 | 1276.386 | 3329.6                                                                   | 2 | 220.6  | 59.1 | 1  | R.ELISNASDALDK.I                 |
| *              | HsFLAG-FLJ20729_   | 3.5658 | 0.2661 | 2046.46 | 2047.267 | 8170.2                                                                   | 1 | 624.8  | 44.4 | 1  | R.LISLTDENALSGNEELTVK.I          |
| *              | HsFLAG-p53-DNA-D   | 3.4944 | 0.3046 | 1513.89 | 1514.74  | 6958.1                                                                   | 4 | 561.8  | 53.8 | 2  | K.NLLHVTDTGVMTR.E                |
| *              | HsFlag-VPS71_Ti_1  | 3.8423 | 0.1142 | 2115.88 | 2113.437 | 6284.4                                                                   | 1 | 913.7  | 38.9 | 1  | K.NLLHVTDTGVMTREELVK.N           |
| *              | HsFLAG-p53-DNA-D   | 4.3139 | 0.3291 | 2006.8  | 2008.327 | 6914.8                                                                   | 1 | 1796.1 | 73.3 | 2  | K.KYSQFINFPIYVWSSK.T             |
| *              | HsFLAG-p53-DNA-D   | 4.839  | 0.3617 | 1879.47 | 1880.153 | 5945.1                                                                   | 1 | 1431.6 | 75   | 16 | K.YSQFINFPIYVWSSK.T              |
| *              | HsFLAG-ARP6_Ti_1   | 3.3014 | 0.3266 | 1866.91 | 1867.782 | 6626.6                                                                   | 1 | 730.1  | 56.7 | 2  | K.EESDDEAAVEEEEEK.K              |
| *              | HsFLAG-FLJ20729_   | 4.3079 | 0.273  | 1485.92 | 1486.622 | 5137.7                                                                   | 1 | 1227.4 | 73.1 | 2  | K.GVVDSDDLLPLNVS.R.E             |
| *              | HsFLAG-ARP6_Ti_1   | 5.3248 | 0.3087 | 2260.43 | 2261.412 | 9582.1                                                                   | 1 | 2102.3 | 45.8 | 6  | R.FQSSHPTDITSLDQYVER.M           |

|                |                    |        |        |         |          |                                                                                                               |   |        |      |                                     |
|----------------|--------------------|--------|--------|---------|----------|---------------------------------------------------------------------------------------------------------------|---|--------|------|-------------------------------------|
| *              | HsFLAG-ARP6_Ti_1   | 4.1683 | 0.3744 | 2260.63 | 2261.412 | 5242.4                                                                                                        | 1 | 597.3  | 52.8 | 6 R.FQSSHPTDITSLDQYVER.M            |
| *              | HsFLAG-Lin9_Ti_20  | 3.7747 | 0.2621 | 3077.59 | 3078.408 | 5737.3                                                                                                        | 1 | 849.1  | 32   | 2 K.KGYEVIYLTEPVDEYCIQALPEFDGK.R    |
| *              | HsFLAG-p53-DNA-D   | 4.5311 | 0.2731 | 3234.68 | 3234.596 | 9819.8                                                                                                        | 1 | 860.5  | 26.9 | 1 K.KGYEVIYLTEPVDEYCIQALPEFDGKR.F   |
| *              | HsFLAG-FLJ20729_   | 3.5806 | 0.3674 | 1762.5  | 1762.1   | 10963.1                                                                                                       | 1 | 1126   | 56.7 | 1 K.TVLDLAVVLFETATLR.S              |
| gij 17298690 r | 6                  | 18     | 19.70% | 542     | 58172    | 5.3 fuse-binding protein-interacting repressor isoform b [Homo sapiens]                                       |   |        |      |                                     |
| gij 17978512 r | 6                  | 18     | 19.10% | 559     | 59876    | 5.3 fuse-binding protein-interacting repressor isoform a [Homo sapiens]                                       |   |        |      |                                     |
|                | HsFLAG-p53-DNA-D   | 3.1578 | 0.3027 | 1763.59 | 1763.044 | 4523                                                                                                          | 1 | 545.8  | 60   | 2 K.LGLPPLTPEQQEALQK.A              |
|                | HsFlag-VPS71_Ti_10 | 4.2901 | 0.3964 | 2363.05 | 2363.636 | 3738.5                                                                                                        | 1 | 496.1  | 50   | 3 K.VGRPSNIGQAQPIIDQLAEAR.A         |
|                | HsFlag-VPS71_Ti_10 | 5.3917 | 0.375  | 2364.43 | 2363.636 | 6732.2                                                                                                        | 1 | 1260.2 | 36.9 | 4 K.VGRPSNIGQAQPIIDQLAEAR.A         |
|                | HsFlag-VPS71_Ti_10 | 4.6394 | 0.4738 | 2387.88 | 2388.614 | 5301                                                                                                          | 1 | 1114   | 57.1 | 3 K.AQSSQDAVSSMNLFDLGGQYLR.V        |
|                | HsFLAG-FLJ20729_   | 4.6017 | 0.2193 | 2796.35 | 2796.341 | 6431.5                                                                                                        | 1 | 912.6  | 30   | 2 K.AVTTPMPLLTATPGGLPPAAAIAAAATAK.I |
|                | HsFlag-DPCD_Ti_20  | 4.9181 | 0.4994 | 1824.29 | 1824.813 | 7453.9                                                                                                        | 1 | 2092.2 | 76.7 | 4 K.DIDDDLEGEVTEECGK.F              |
| gij 9910244 re | 4                  | 9      | 19.70% | 360     | 41280    | 7.9 mitochondrial ribosomal protein S22 [Homo sapiens]                                                        |   |        |      |                                     |
| *              | HsFlag-NUFIP_Ti_10 | 3.7527 | 0.2315 | 1385.51 | 1385.646 | 6701.8                                                                                                        | 1 | 1069.7 | 72.7 | 4 K.PAIQELKPPTYK.L                  |
| *              | HsFlag-NUFIP_Ti_10 | 4.7674 | 0.3782 | 2164.61 | 2165.51  | 11219.6                                                                                                       | 1 | 1545.3 | 58.3 | 1 K.MPPVLEERVPIINDVLAEDK.I          |
| *              | HsFlag-NUFIP_Ti_10 | 3.6605 | 0.3077 | 1588.08 | 1586.915 | 8442.8                                                                                                        | 1 | 972.4  | 66.7 | 2 K.ILTPPIIFKEENLR.T                |
| *              | HsFlag-NUFIP_Ti_10 | 5.0816 | 0.3623 | 2920.04 | 2920.208 | 7304.9                                                                                                        | 1 | 838.2  | 29.8 | 2 R.DLIDDATNLVQLYHVLHPDGQSAQGAK.D   |
| gij 41148736 r | 5                  | 17     | 19.70% | 295     | 32707    | 4.8 PREDICTED: similar to 40S ribosomal protein SA (p40) (34/67 kDa laminin receptor) (Colon carcinoma lamini |   |        |      |                                     |
| gij 89028699 r | 5                  | 17     | 19.70% | 295     | 32707    | 4.8 PREDICTED: similar to 40S ribosomal protein SA (p40) (34/67 kDa laminin receptor) (Colon carcinoma lamini |   |        |      |                                     |
| gij 89028697 r | 5                  | 17     | 19.70% | 295     | 32707    | 4.8 PREDICTED: similar to 40S ribosomal protein SA (p40) (34/67 kDa laminin receptor) (Colon carcinoma lamini |   |        |      |                                     |
| gij 89028693 r | 5                  | 17     | 21.70% | 267     | 29710    | 5.5 PREDICTED: similar to 40S ribosomal protein SA (p40) (34/67 kDa laminin receptor) (Colon carcinoma lamini |   |        |      |                                     |
| gij 89028091 r | 5                  | 17     | 19.70% | 295     | 32707    | 4.8 PREDICTED: similar to 40S ribosomal protein SA (p40) (34/67 kDa laminin receptor) (Colon carcinoma lamini |   |        |      |                                     |
| gij 89028089 r | 5                  | 17     | 19.70% | 295     | 32707    | 4.8 PREDICTED: similar to 40S ribosomal protein SA (p40) (34/67 kDa laminin receptor) (Colon carcinoma lamini |   |        |      |                                     |
| gij 89028084 r | 5                  | 17     | 21.70% | 267     | 29710    | 5.5 PREDICTED: similar to 40S ribosomal protein SA (p40) (34/67 kDa laminin receptor) (Colon carcinoma lamini |   |        |      |                                     |
|                | HsFlag-NUFIP_Ti_10 | 3.5193 | 0.3235 | 2616.14 | 2618.967 | 9326.7                                                                                                        | 1 | 632.1  | 36.4 | 3 K.FLAAGTHLGGTNLDFQMEQYIYK.R       |
|                | HsFlag-NUFIP_Ti_10 | 4.6361 | 0.1686 | 2617.8  | 2618.967 | 11645.9                                                                                                       | 1 | 1168.9 | 31.8 | 1 K.FLAAGTHLGGTNLDFQMEQYIYK.R       |
|                | HsFlag-NUFIP_Ti_10 | 3.2111 | 0.1384 | 1136.52 | 1136.334 | 3726.7                                                                                                        | 3 | 871.1  | 83.3 | 9 K.SDGIYIINLK.R                    |
|                | HsFLAG-TCF3_Ti_10  | 3.9474 | 0.3587 | 1742.78 | 1741.982 | 7911.5                                                                                                        | 1 | 1408.1 | 65.6 | 3 R.AIVAIENPADVSVISSR.N             |
|                | HsFlag-NUFIP_Ti_10 | 3.0509 | 0.2708 | 913.3   | 913.105  | 4232                                                                                                          | 2 | 978    | 92.9 | 1 R.LLVVTDPR.A                      |
| gij 57242798 r | 5                  | 12     | 19.60% | 455     | 50814    | 5.6 acid sphingomyelinase-like phosphodiesterase 3B isoform 1 [Homo sapiens]                                  |   |        |      |                                     |
| gij 57242800 r | 5                  | 12     | 23.90% | 373     | 41689    | 6.2 acid sphingomyelinase-like phosphodiesterase 3B isoform 2 [Homo sapiens]                                  |   |        |      |                                     |
|                | HsFLAG-ARP6_Ti_1   | 3.7254 | 0.4057 | 1470.2  | 1469.643 | 7517.6                                                                                                        | 1 | 1140.5 | 70.8 | 2 K.VYAALGNHDFHPK.N                 |
|                | HsFLAG-ARP6_Ti_1   | 3.8833 | 0.4186 | 2207.25 | 2208.438 | 6498.7                                                                                                        | 1 | 858    | 55.6 | 3 K.NQFPAGSNNIYNQIAELWK.P           |
|                | HsFLAG-ARP6_Ti_1   | 4.6514 | 0.4335 | 1963.3  | 1964.289 | 4932.2                                                                                                        | 1 | 1475.1 | 76.5 | 3 K.AGDMVYIVGHVPPGFFEK.T            |
|                | HsFLAG-ARP6_Ti_1   | 4.2575 | 0.4262 | 2509.1  | 2510.969 | 2994.5                                                                                                        | 1 | 507.2  | 52.3 | 2 R.MLYDDAGVPISAMFITPGVTPWK.T       |
|                | HsFLAG-ARP6_Ti_1   | 3.438  | 0.3269 | 1594.61 | 1594.811 | 5878.8                                                                                                        | 1 | 603.9  | 53.3 | 2 K.TTLPGVVNGANNPAIR.V              |
| gij 31742498 r | 10                 | 20     | 19.50% | 717     | 80311    | 6.7 unc-84 homolog B [Homo sapiens]                                                                           |   |        |      |                                     |
| *              | HsFLAG-ARP6_Ti_1   | 2.8711 | 0.1928 | 1302.03 | 1302.346 | 6962.5                                                                                                        | 1 | 924.8  | 75   | 1 R.DSSPHFQAEQR.V                   |
| *              | HsFLAG-ARP6_Ti_1   | 4.0541 | 0.4996 | 1750.32 | 1750.952 | 7646.7                                                                                                        | 1 | 837.5  | 60.7 | 2 R.RLEALAAEFSSNWQK.E               |
| *              | HsFLAG-ARP6_Ti_1   | 4.7236 | 0.2893 | 2081.19 | 2081.42  | 8412.6                                                                                                        | 1 | 1482.9 | 58.3 | 4 R.RLEDQLAGLQQELAAALK.Q            |
| *              | HsFLAG-TCF3_Ti_10  | 5.0036 | 0.387  | 2010.76 | 2010.213 | 4451.5                                                                                                        | 1 | 1032.5 | 68.8 | 1 R.DDVESQFFAWISQFLAR.G             |
| *              | HsFLAG-TCF3_Ti_10  | 2.9328 | 0.2506 | 1226.41 | 1227.464 | 6401.7                                                                                                        | 1 | 748.1  | 65   | 1 K.ILTHVAEMQGK.S                   |
| *              | HsFLAG-TCF3_Ti_10  | 3.1103 | 0.3414 | 1226.48 | 1227.464 | 5881                                                                                                          | 1 | 1231   | 85   | 3 K.ILTHVAEMQGK.S                   |

|               |                     |        |        |         |          |        |   |        |      |    |                                                                                 |
|---------------|---------------------|--------|--------|---------|----------|--------|---|--------|------|----|---------------------------------------------------------------------------------|
| *             | HsFLAG-ARP6_Ti_1    | 3.8956 | 0.3805 | 2186.96 | 2187.549 | 3873.9 | 1 | 454.4  | 50   | 3  | K.TALLSLFGIPLWYHSQSPR.V                                                         |
| *             | Hs293Flag-les2_Ti_1 | 2.9832 | 0.222  | 1462.58 | 1461.748 | 4364.1 | 3 | 573.4  | 66.7 | 1  | R.IRPTAVTLEHVPK.A                                                               |
| *             | HsFLAG-ARP6_Ti_1    | 4.896  | 0.5047 | 2244.65 | 2244.463 | 8138.9 | 1 | 1501.9 | 60.5 | 1  | K.DFAIFGFDEDLQQEGTLLGK.F                                                        |
| *             | HsFLAG-ARP6_Ti_1    | 4.2956 | 0.3072 | 1922.96 | 1924.132 | 4281.5 | 1 | 651.3  | 64.3 | 3  | R.ILTNWGHPEYTCIYR.F                                                             |
| gij4503249 re |                     | 7      | 18     | 19.50%  | 375      | 42674  |   |        |      |    | 8.6 DEK oncogene (DNA binding) [Homo sapiens]                                   |
| *             | HsFlag-VPS71_Ti_1   | 5.2357 | 0.3482 | 2134.85 | 2135.486 | 7150.1 | 1 | 1714.6 | 63.9 | 5  | R.LTMQVSSLQREPFTIAQGK.G                                                         |
| *             | HsFLAG-p53-DNA-D    | 4.0401 | 0.2236 | 1448.57 | 1448.706 | 9381.5 | 4 | 1159.1 | 66.7 | 1  | K.LLYNRPGTVSSLK.K                                                               |
| *             | HsFLAG-p53-DNA-D    | 2.9421 | 0.1057 | 1577.7  | 1576.88  | 6396.9 | 1 | 692.7  | 61.5 | 1  | K.LLYNRPGTVSSLK.K                                                               |
| *             | HsFLAG-Lin9_Ti_20   | 3.7392 | 0.3541 | 1358.53 | 1357.508 | 6794.6 | 1 | 1113.5 | 77.3 | 6  | K.NVGQFSGFPFEK.G                                                                |
| *             | HsFLAG-p53-DNA-D    | 3.5812 | 0.2915 | 1527.79 | 1528.743 | 4975.8 | 1 | 782.2  | 79.2 | 2  | K.KPPTDEELKETIK.K                                                               |
| *             | HsFLAG-p53-DNA-D    | 3.2607 | 0.1983 | 1656.6  | 1656.917 | 5881.9 | 1 | 869.3  | 73.1 | 2  | K.KPPTDEELKETIK.L                                                               |
| *             | HsFLAG-p53-DNA-D    | 3.6226 | 0.2529 | 1791.66 | 1791.955 | 5601   | 1 | 1257.4 | 73.1 | 1  | K.KVYENYPTYDLTER.K                                                              |
| gij89031528 r |                     | 5      | 30     | 19.50%  | 261      | 29663  |   |        |      |    | 9.5 PREDICTED: similar to ribosomal protein S3a isoform 2 [Homo sapiens]        |
| gij89033501 r |                     | 5      | 30     | 19.50%  | 261      | 29663  |   |        |      |    | 9.5 PREDICTED: similar to ribosomal protein S3a isoform 4 [Homo sapiens]        |
|               | HsFLAG-ARP6_Ti_1    | 5.3162 | 0.3754 | 1954.19 | 1953.159 | 9005.6 | 1 | 1457.3 | 65.6 | 9  | R.VFEVSLADLQNDVAFR.K                                                            |
|               | HsFLAG-ARP6_Ti_1    | 2.4371 | 0.2371 | 1002.2  | 1003.141 | 6614.1 | 8 | 656.9  | 75   | 2  | K.LITEDVQGK.N                                                                   |
|               | HsFLAG-TCF3_Ti_1    | 2.225  | 0.0948 | 1345.67 | 1346.489 | 4817.4 | 8 | 250.3  | 60   | 1  | R.KTSYAQQHQQVR.Q                                                                |
|               | HsFLAG-TCF3_Ti_1    | 3.5192 | 0.389  | 1346.3  | 1346.489 | 8913.7 | 1 | 1196.9 | 75   | 2  | R.KTSYAQQHQQVR.Q                                                                |
|               | HsFLAG-ARP6_Ti_1    | 4.4478 | 0.4012 | 1705.36 | 1705.92  | 4182.9 | 1 | 949.7  | 76.9 | 16 | K.ACQSIYPLHDVFR.K                                                               |
| gij5803111 re |                     | 5      | 11     | 19.30%  | 306      | 34820  |   |        |      |    | 10.1 EBNA1 binding protein 2 [Homo sapiens]                                     |
| *             | HsFLAG-ARP6_Ti_1    | 3.3451 | 0.3034 | 1536.24 | 1534.883 | 2417.5 | 1 | 496.7  | 75   | 2  | R.GLLKPGLNVVLEGPK.K                                                             |
| *             | HsFLAG-ARP6_Ti_1    | 3.4897 | 0.2749 | 1662.95 | 1663.057 | 2714.2 | 1 | 485.3  | 66.7 | 2  | R.GLLKPGLNVVLEGPK.K                                                             |
| *             | HsFLAG-ARP6_Ti_1    | 4.2629 | 0.3455 | 2189.74 | 2190.458 | 4924.3 | 1 | 480.8  | 45.2 | 4  | R.LDVTLGPVPEIGGSEAPAPQNK.D                                                      |
| *             | HsFLAG-ARP6_Ti_1    | 2.8466 | 0.3083 | 1237.6  | 1237.488 | 7382.1 | 3 | 1026.5 | 77.3 | 1  | R.QAQAVALVLP.L                                                                  |
| *             | HsFLAG-ARP6_Ti_1    | 2.7016 | 0.1134 | 1073.36 | 1073.278 | 5881.8 | 4 | 851.7  | 87.5 | 2  | K.KVQTEVLQK.R                                                                   |
| gij21735621 r |                     | 5      | 17     | 19.20%  | 338      | 35503  |   |        |      |    | 8.7 mitochondrial malate dehydrogenase precursor [Homo sapiens]                 |
| *             | HsFLAG-p53-DNA-D    | 6.1983 | 0.4626 | 1793.99 | 1794.188 | 6547.8 | 1 | 1681   | 69.4 | 10 | K.VAVLGASGGIGQPLSLLK.N                                                          |
| *             | HsFLAG-p53-DNA-D    | 4.6117 | 0.3055 | 2366.01 | 2366.676 | 6427.8 | 1 | 694.7  | 47.6 | 1  | R.LTLYDIAHTPGVAADLSHIETK.A                                                      |
| *             | HsFLAG-p53-DNA-D    | 6.2351 | 0.3804 | 2366.92 | 2366.676 | 8119.5 | 1 | 2313.9 | 45.2 | 3  | R.LTLYDIAHTPGVAADLSHIETK.A                                                      |
| *             | HsFlag-NUFIP_Ti_1   | 2.7436 | 0.3209 | 1149.33 | 1148.351 | 3833.4 | 1 | 638.3  | 77.3 | 1  | R.VNVPVIGGHAGK.T                                                                |
| *             | HsFLAG-p53-DNA-D    | 3.5851 | 0.2351 | 1371.52 | 1371.626 | 5237.4 | 1 | 671.8  | 72.7 | 2  | K.TIPLISQCTPK.V                                                                 |
| gij13027644 r |                     | 7      | 42     | 19.20%  | 240      | 24614  |   |        |      |    | 11.2 small nuclear ribonucleoprotein polypeptide N [Homo sapiens]               |
| gij4507135 re |                     | 7      | 42     | 19.20%  | 240      | 24614  |   |        |      |    | 11.2 small nuclear ribonucleoprotein polypeptide N [Homo sapiens]               |
| gij4507125 re |                     | 7      | 42     | 19.90%  | 231      | 23656  |   |        |      |    | 10.9 small nuclear ribonucleoprotein polypeptide B/B' isoform B [Homo sapiens]  |
| gij38150007 r |                     | 7      | 42     | 19.20%  | 240      | 24610  |   |        |      |    | 11.2 small nuclear ribonucleoprotein polypeptide B/B' isoform B' [Homo sapiens] |
| gij13027650 r |                     | 7      | 42     | 19.20%  | 240      | 24614  |   |        |      |    | 11.2 small nuclear ribonucleoprotein polypeptide N [Homo sapiens]               |
| gij13027648 r |                     | 7      | 42     | 19.20%  | 240      | 24614  |   |        |      |    | 11.2 small nuclear ribonucleoprotein polypeptide N [Homo sapiens]               |
| gij13027646 r |                     | 7      | 42     | 19.20%  | 240      | 24614  |   |        |      |    | 11.2 small nuclear ribonucleoprotein polypeptide N [Homo sapiens]               |
|               | HsFLAG-p53-DNA-D    | 2.9621 | 0.1557 | 1075.95 | 1076.259 | 3894.5 | 2 | 693.3  | 92.9 | 4  | K.MLQHIDYR.M                                                                    |
|               | HsFLAG-p53-DNA-D    | 4.4186 | 0.2476 | 1723.65 | 1723.873 | 7578.3 | 1 | 2143.8 | 87.5 | 2  | K.HMNLILCDCDEF.R.K                                                              |
|               | HsFlag-NUFIP_Ti_1   | 4.987  | 0.3526 | 1852.53 | 1852.047 | 9814.2 | 1 | 2360.3 | 84.6 | 9  | K.HMNLILCDCDEF.R.K.I                                                            |
|               | HsFlag-NUFIP_Ti_1   | 4.4276 | 0.2012 | 1852.57 | 1852.047 | 7293.7 | 1 | 1494.6 | 51.9 | 9  | K.HMNLILCDCDEF.R.K.I                                                            |
|               | HsFLAG-p53-DNA-D    | 3.439  | 0.1259 | 1039.43 | 1039.353 | 6219.5 | 2 | 1117.9 | 93.8 | 13 | K.RVLGLVLLR.G                                                                   |

|               |                    |        |        |         |          |         |                                                                    |        |      |                                 |
|---------------|--------------------|--------|--------|---------|----------|---------|--------------------------------------------------------------------|--------|------|---------------------------------|
|               | HsFLAG-p53-DNA-D   | 3.4075 | 0.1077 | 883.05  | 883.166  | 3444.4  | 4                                                                  | 848.7  | 92.9 | 2 R.VLGLVLLR.G                  |
|               | HsFLAG-ARP6_Ti_1   | 4.6    | 0.4766 | 1555.72 | 1555.786 | 6102.5  | 1                                                                  | 1160.6 | 67.9 | 3 R.GENLVSMTEVEGPPPK.D          |
| gi 30581135 r | 18                 | 38     | 19.10% | 1233    | 143233   | 7.6     | SMC1 structural maintenance of chromosomes 1-like 1 [Homo sapiens] |        |      |                                 |
| *             | HsFlag-VPS71_Ti_10 | 4.556  | 0.3153 | 1524.57 | 1524.772 | 6479.6  | 1                                                                  | 1784.8 | 80.8 | 6 K.SNLMDAISFVLGEK.T            |
| *             | HsARP6-FLAG_Ti_1   | 3.1182 | 0.2614 | 1516.56 | 1516.743 | 4885.8  | 2                                                                  | 443.9  | 57.1 | 1 R.DLIHGAPVKGPAANR.A           |
| *             | HsFlag-VPS71_Ti_10 | 2.5058 | 0.2609 | 1038.61 | 1039.174 | 6286.4  | 1                                                                  | 727.5  | 72.2 | 1 R.VIVGGSSEYK.I                |
| *             | HsFLAG-Lin9_Ti_20  | 3.7722 | 0.2299 | 1603.03 | 1603.769 | 9364.4  | 1                                                                  | 1158.5 | 70.8 | 1 K.VVQLHEYSEELEK.L             |
| *             | HsYL1_Ti_101.1795. | 2.7774 | 0.1412 | 1189.4  | 1189.308 | 4665.8  | 8                                                                  | 643.7  | 72.2 | 1 R.DLTLEENQVK.K                |
| *             | HsFlag-VPS71_Ti_10 | 2.9603 | 0.0933 | 1230.59 | 1230.407 | 6423.1  | 1                                                                  | 1411.4 | 90   | 1 K.RAATLAQELEK.F               |
| *             | HsFLAG-Lin9_Ti_20  | 2.8082 | 0.1962 | 1168.2  | 1168.341 | 9726.2  | 1                                                                  | 905.4  | 72.2 | 1 K.RLYPGSVYGR.L                |
| *             | HsFLAG-ARP6_Ti_1   | 4.5431 | 0.4053 | 2320.72 | 2321.586 | 4283.3  | 1                                                                  | 523.1  | 50   | 5 R.GEPETFLPLDYLEVKPTDEK.L      |
| *             | HsFlag-VPS71_Ti_10 | 2.5565 | 0.2308 | 1065.58 | 1066.246 | 5941.3  | 3                                                                  | 536.9  | 68.8 | 1 R.HLALNLQEK.S                 |
| *             | HsARP6-FLAG_Ti_1   | 3.0265 | 0.2073 | 1066.13 | 1066.246 | 4155    | 2                                                                  | 830.8  | 87.5 | 1 R.HLALNLQEK.S                 |
| *             | HsFLAG-p53-DNA-D   | 4.1869 | 0.2441 | 1448.47 | 1448.619 | 8444.9  | 1                                                                  | 1745.9 | 75   | 6 K.SKLESELANFGPR.I             |
| *             | HsFLAG-FLJ20729_   | 4.0029 | 0.1208 | 1518.91 | 1518.766 | 11949.9 | 5                                                                  | 1595.2 | 70.8 | 1 K.IIDETMAQLQDLK.N             |
| *             | HsYL1_Ti_101.1746. | 4.6697 | 0.434  | 2486.32 | 2487.482 | 7715.9  | 1                                                                  | 1687.4 | 54.3 | 3 K.GTMDDISQEEGSSSQGEDSVSGSQR.I |
| *             | HsFLAG-FLJ20729_   | 4.6908 | 0.3986 | 1618.48 | 1618.96  | 7244.8  | 1                                                                  | 1075.3 | 67.9 | 1 K.TVAALALLFAIHSYK.P           |
| *             | HsFLAG-FLJ20729_   | 4.5259 | 0.2474 | 2261.33 | 2261.536 | 5318.7  | 1                                                                  | 1079.4 | 40   | 3 K.PAPFFVLDEIDAALDNTNIGK.V     |
| *             | HsFlag-DPCD_Ti_20  | 3.1817 | 0.2962 | 1965.56 | 1966.161 | 5186.6  | 3                                                                  | 446    | 47.1 | 2 K.AESLIGVYPEQGDCVISK.V        |
| *             | HsFLAG-p53-DNA-D   | 3.3366 | 0.2221 | 2177.71 | 2177.375 | 7657.5  | 2                                                                  | 382.2  | 38.9 | 1 K.VLTFDLTKYPDANPNPNEQ.-       |
| *             | HsFLAG-FLJ20309_   | 2.8542 | 0.2364 | 1258.31 | 1259.274 | 8229.8  | 3                                                                  | 897.7  | 65   | 2 K.YPDANPNPNEQ.-               |
| gi 74136549 r | 16                 | 29     | 19.10% | 1188    | 132375   | 8.7     | AT rich interactive domain 5B (MRF1-like) [Homo sapiens]           |        |      |                                 |
| *             | HsH2AZ-FLAG_293_   | 3.616  | 0.2477 | 1330.52 | 1330.532 | 8428    | 1                                                                  | 1782.3 | 85   | 1 K.AFQFHLEGGKPR.I              |
| *             | HsH2AZ-FLAG_293_   | 3.6416 | 0.2511 | 1314.64 | 1314.57  | 4669.9  | 1                                                                  | 1126.8 | 90   | 3 R.ILSLGDFFFVR.C               |
| *             | HsH2AZ-FLAG_293_   | 5.1456 | 0.3975 | 1884.55 | 1886.121 | 6058    | 1                                                                  | 1748.9 | 78.6 | 6 K.DPICIAELQLLWEER.T           |
| *             | HsH2AZ-FLAG_293_   | 3.2116 | 0.3526 | 1629.24 | 1629.678 | 9903.3  | 1                                                                  | 803.8  | 57.1 | 1 R.NSDHGEDEVIAVSEK.V           |
| *             | HsH2AZ-FLAG_293_   | 3.2713 | 0.2065 | 1156.57 | 1156.451 | 6429.1  | 1                                                                  | 1450.4 | 88.9 | 1 K.VIVKLEDLVK.W                |
| *             | HsH2AZ-FLAG_293_   | 2.5441 | 0.1006 | 1006.35 | 1006.106 | 5162.1  | 4                                                                  | 586.6  | 85.7 | 1 K.WVHSDFSK.W                  |
| *             | HsH2AZ-FLAG_293_   | 3.0342 | 0.204  | 973.33  | 973.086  | 6044.6  | 1                                                                  | 1079.8 | 87.5 | 2 R.CGFHAGPVK.T                 |
| *             | HsH2AZ-FLAG_293_   | 3.577  | 0.3642 | 1368.24 | 1368.572 | 6718.9  | 1                                                                  | 1450.5 | 81.8 | 2 R.ADEQAFLVALYK.Y              |
| *             | HsH2AZ-FLAG_293_   | 6.0564 | 0.4727 | 2108.14 | 2108.195 | 5550.6  | 1                                                                  | 2626.2 | 84.2 | 1 K.HIYDELGGNPGSTSAATCTR.R      |
| *             | HsH2AZ-FLAG_293_   | 4.0225 | 0.2007 | 1865.9  | 1865.226 | 6965.5  | 1                                                                  | 1807.5 | 48.3 | 1 R.FIKGEEDKPLPPIKPR.K          |
| *             | HsH2AZ-FLAG_293_   | 2.7187 | 0.2892 | 1824.3  | 1825.075 | 8167.1  | 1                                                                  | 1178.8 | 63.3 | 1 K.KIEGYQEFSKPLASR.V           |
| *             | HsH2AZ-FLAG_293_   | 3.2891 | 0.4197 | 1474.01 | 1472.725 | 4393.8  | 1                                                                  | 578.7  | 67.9 | 4 K.GPTPLPSAPLAPEK.D            |
| *             | HsH2AZ-FLAG_293_   | 2.2438 | 0.3026 | 944.16  | 945.06   | 3117.9  | 4                                                                  | 377.5  | 66.7 | 1 K.DSALVPGASK.Q                |
| *             | HsH2AZ-FLAG_293_   | 4.3019 | 0.4794 | 2536.3  | 2536.885 | 7099.3  | 1                                                                  | 691.5  | 41.7 | 1 K.LLSQVSGASLSSSYPGSPPLISK.K   |
| *             | HsH2AZ-FLAG_293_   | 4.4308 | 0.3406 | 1927.27 | 1928.06  | 5045.7  | 1                                                                  | 911.4  | 61.1 | 1 K.SAAAEAPTDDQPTDLSLPK.N       |
| *             | HsH2AZ-FLAG_293_   | 4.4711 | 0.4484 | 1525.15 | 1525.702 | 7392    | 1                                                                  | 2099.8 | 82.1 | 2 K.VLGLAHSTTGPQESK.G           |
| gi 4506675 re | 6                  | 13     | 19.10% | 607     | 68569    | 6.4     | ribophorin I precursor [Homo sapiens]                              |        |      |                                 |
| *             | HsFLAG-ARP6_Ti_1   | 4.9743 | 0.5636 | 1654.5  | 1654.864 | 6299.1  | 1                                                                  | 1497.3 | 71.9 | 2 K.VTAEVVLHLGGGSTR.A           |
| *             | HsFLAG-p53-DNA-D   | 2.9926 | 0.1405 | 1660.56 | 1660.908 | 9256.3  | 2                                                                  | 837.6  | 53.6 | 1 R.ATSFLLALEPELEAR.L           |
| *             | HsFLAG-ARP6_Ti_1   | 5.9435 | 0.4267 | 2883.8  | 2884.302 | 6775.8  | 1                                                                  | 813.5  | 30.2 | 3 K.ISVIVETVYTHVLHPYPTQITQSEK.Q |
| *             | HsFLAG-ARP6_Ti_1   | 4.3329 | 0.3795 | 2010.51 | 2011.26  | 9294    | 1                                                                  | 1718.8 | 65.6 | 1 K.VHYENNSPFLTITSMTR.V         |

|               |                    |        |        |         |          |         |                                                                                         |        |      |    |                                       |
|---------------|--------------------|--------|--------|---------|----------|---------|-----------------------------------------------------------------------------------------|--------|------|----|---------------------------------------|
| *             | HsFLAG-ARP6_Ti_1   | 4.7308 | 0.3314 | 2998.99 | 2999.349 | 9375.4  | 1                                                                                       | 1050.5 | 29.2 | 3  | K.THYIVGYNLPSYEYLYNLGDQYALK.M         |
| *             | HsFLAG-ARP6_Ti_1   | 4.2853 | 0.3946 | 1992.53 | 1992.236 | 7226.6  | 1                                                                                       | 844.2  | 56.2 | 3  | R.FVDHVFDEQVIDSLTVK.I                 |
| gi 32454741 r | 5                  | 6      | 19.10% | 418     | 46441    | 8.7     | serine (or cysteine) proteinase inhibitor, clade H, member 1 precursor [Homo sapiens]   |        |      |    |                                       |
| *             | HsFLAG-ARP6_Ti_1   | 4.7946 | 0.4455 | 2407.77 | 2406.701 | 8088.4  | 1                                                                                       | 1550.7 | 38.1 | 1  | K.AVLSAEQLRDEEVHAGLGELLR.S            |
| *             | HsFLAG-p53-DNA-D   | 3.8427 | 0.405  | 1660.69 | 1660.824 | 5500.2  | 1                                                                                       | 1117.4 | 75   | 1  | R.LYGPSSVSFADDFVR.S                   |
| *             | HsFLAG-p53-DNA-D   | 3.841  | 0.3161 | 1984.63 | 1985.395 | 4891.1  | 1                                                                                       | 867.7  | 59.4 | 1  | K.LSSLILMPHHVEPLER.L                  |
| *             | HsFLAG-ARP6_Ti_1   | 3.761  | 0.2997 | 1338.11 | 1338.547 | 4661.5  | 1                                                                                       | 1124.4 | 83.3 | 1  | K.HLAGLGLTEAIDK.N                     |
| *             | HsFLAG-p53-DNA-D   | 3.6341 | 0.3768 | 1640.25 | 1638.952 | 4840.4  | 1                                                                                       | 881.8  | 75   | 2  | K.LFYADHPFFILVR.D                     |
| gi 5032087 re | 12                 | 59     | 19.00% | 793     | 88886    | 5.2     | splicing factor 3a, subunit 1, 120kDa isoform 1 [Homo sapiens]                          |        |      |    |                                       |
| *             | HsFlag-VPS71_Ti_1( | 3.859  | 0.3669 | 1932.93 | 1932.104 | 4165    | 1                                                                                       | 397.5  | 53.6 | 10 | K.FNFLNPNDPYHAYR.H                    |
| *             | HsFLAG-ARP6_Ti_2   | 4.3272 | 0.2092 | 1943.18 | 1943.185 | 6043.6  | 1                                                                                       | 1305.8 | 66.7 | 2  | K.VMQQQQTTQQQLPQK.V                   |
| *             | HsFlag-VPS71_Ti_1( | 3.0923 | 0.2869 | 2660.34 | 2660.98  | 3677.5  | 6                                                                                       | 241.3  | 34.8 | 4  | K.EPPPEFEFIADPPSISAFDLDVVK.L          |
| *             | HsFLAG-FLJ20729_   | 3.9498 | 0.1546 | 2662.47 | 2660.98  | 6468.4  | 2                                                                                       | 697.1  | 29.3 | 1  | K.EPPPEFEFIADPPSISAFDLDVVK.L          |
| *             | HsFLAG-p53-DNA-D   | 3.6132 | 0.3732 | 2465.63 | 2466.761 | 10276.1 | 1                                                                                       | 869.3  | 47.2 | 1  | R.NYQFDFLRPQHSLFNFTK.L                |
| *             | HsFLAG-UTX1_Ti_2(  | 4.7779 | 0.3889 | 2378.04 | 2378.728 | 6818.9  | 1                                                                                       | 970.2  | 34.1 | 10 | K.ASKPLPPAPAPDEYLVSPITGEK.I           |
| *             | HsFLAG-ARP6_Ti_1   | 4.7691 | 0.435  | 2378.48 | 2378.728 | 6011.4  | 1                                                                                       | 991.2  | 54.5 | 12 | K.ASKPLPPAPAPDEYLVSPITGEK.I           |
| *             | HsFLAG-ARP5_Ti_1   | 3.7554 | 0.2665 | 2874.65 | 2875.335 | 7088.5  | 1                                                                                       | 753.4  | 29.6 | 1  | K.ASKPLPPAPAPDEYLVSPITGEKIPASK.M      |
| *             | HsFlag-DPCD_Ti_20  | 3.114  | 0.1688 | 1966.3  | 1967.094 | 5247.9  | 2                                                                                       | 407.6  | 44.1 | 2  | K.QSDDEVYAPGLDISSLK.Q                 |
| *             | HsFlag-VPS71_Ti_1( | 3.8107 | 0.1954 | 2185.89 | 2185.612 | 5534.5  | 3                                                                                       | 428.7  | 44.7 | 10 | K.LNGQVLVFTLPLTDQVSVIK.V              |
| *             | HsFlag-VPS71_Ti_1( | 2.71   | 0.3374 | 1111.51 | 1112.289 | 4154.5  | 1                                                                                       | 557.8  | 70   | 4  | K.IHEATGMPAGK.Q                       |
| *             | HsFlag-VPS71_Ti_1( | 3.0433 | 0.3151 | 1112.52 | 1112.289 | 4427.2  | 1                                                                                       | 810.5  | 80   | 2  | K.IHEATGMPAGK.Q                       |
| gi 4504865 re | 12                 | 35     | 19.00% | 711     | 73161    | 7.3     | KH-type splicing regulatory protein (FUSE binding protein 2) [Homo sapiens]             |        |      |    |                                       |
| *             | HsFlag-DPCD_Ti_20  | 5.379  | 0.5419 | 2154.54 | 2155.285 | 7451.4  | 1                                                                                       | 1226.7 | 54.8 | 9  | K.IGGDAATTVNNSTPDFGFGGQK.R            |
| *             | HsFLAG-Lin9_Ti_20( | 5.0483 | 0.3783 | 2186.29 | 2186.476 | 7546.3  | 1                                                                                       | 1275   | 38.8 | 1  | K.KLASQGDSISSQLGPIHPPPR.T             |
| *             | HsFLAG-Lin9_Ti_20( | 4.0752 | 0.3558 | 2057.48 | 2058.302 | 5468    | 1                                                                                       | 554.2  | 47.4 | 2  | K.LASQGDSISSQLGPIHPPPR.T              |
| *             | HsFLAG-Lin9_Ti_20( | 4.4356 | 0.3411 | 2057.54 | 2058.302 | 6643.9  | 1                                                                                       | 920.6  | 39.5 | 1  | K.LASQGDSISSQLGPIHPPPR.T              |
| *             | HsFLAG-Lin9_Ti_20( | 4.1787 | 0.1359 | 1080.03 | 1080.272 | 6347.8  | 1                                                                                       | 1700.1 | 95   | 1  | R.IGGGIDVPVPR.H                       |
| *             | HsFLAG-Lin9_Ti_20( | 2.5466 | 0.1675 | 923.91  | 924.091  | 3957.1  | 1                                                                                       | 605.7  | 87.5 | 1  | R.HSVGVVIGR.S                         |
| *             | HsFLAG-Lin9_Ti_20( | 4.0373 | 0.1484 | 1185.22 | 1185.409 | 6036.5  | 1                                                                                       | 1465.2 | 94.4 | 3  | R.IINDLLQSLR.S                        |
| *             | HsFlag-DPCD_Ti_20  | 2.9382 | 0.2392 | 1534.33 | 1534.712 | 9747.8  | 1                                                                                       | 1075.9 | 61.5 | 1  | K.AINQQTGFVVEISR.Q                    |
| *             | HsFlag-VPS71_Ti_1( | 4.0208 | 0.2559 | 2109.85 | 2110.334 | 5959.6  | 1                                                                                       | 1092   | 61.1 | 4  | K.KIGQQPQQPGAPPQQDYTK.A               |
| *             | HsFLAG-Lin9_Ti_20( | 4.2504 | 0.2378 | 2111.35 | 2110.334 | 7750.4  | 1                                                                                       | 1854.6 | 45.8 | 1  | K.KIGQQPQQPGAPPQQDYTK.A               |
| *             | HsFlag-DPCD_Ti_20  | 4.3743 | 0.2261 | 1981.18 | 1982.16  | 6044.2  | 1                                                                                       | 2185.8 | 79.4 | 8  | K.IGQQPQQPGAPPQQDYTK.A                |
| *             | HsFLAG-Lin9_Ti_20( | 3.8498 | 0.3892 | 2953.9  | 2954.141 | 3858.1  | 1                                                                                       | 295.7  | 35.7 | 3  | K.QAQVATGGGPGAPPGSQPDYSAAWAEYYR.Q     |
| gi 46852398 r | 1                  | 2      | 19.00% | 142     | 15961    | 4.9     | biogenesis of lysosome-related organelles complex-1, subunit 2 isoform 1 [Homo sapiens] |        |      |    |                                       |
| gi 47717129 r | 1                  | 2      | 27.30% | 99      | 11489    | 8.7     | biogenesis of lysosome-related organelles complex-1, subunit 2 isoform 2 [Homo sapiens] |        |      |    |                                       |
| *             | HsFLAG-FLJ20729_   | 4.828  | 0.4089 | 3038.71 | 3039.412 | 8193.9  | 1                                                                                       | 943.2  | 28.8 | 2  | K.YAGLQPYLDQINVIEEQAALQAAYK.L         |
| gi 14141170 r | 7                  | 11     | 18.90% | 668     | 75023    | 9.7     | metastasis-associated protein 2 [Homo sapiens]                                          |        |      |    |                                       |
| *             | HsSrcap_Ti_202.257 | 4.8595 | 0.4336 | 2110.65 | 2110.287 | 10002.7 | 1                                                                                       | 1877.4 | 64.7 | 3  | R.VGDYVYFENSSSNPYLVR.R                |
| *             | HsSrcap_Ti_202.012 | 5.3455 | 0.4714 | 1551.97 | 1550.622 | 8666.8  | 1                                                                                       | 2051.5 | 78.6 | 1  | R.DISSLNSLADSNAR.E                    |
| *             | HsSrcap_Ti_205.584 | 3.8072 | 0.2453 | 4002.83 | 4003.424 | 10902.2 | 1                                                                                       | 774.1  | 22.7 | 2  | K.CSVTLLNETDILSQYLEKEDCFFYSLVFDPVQK.T |
| *             | HsFlag-VPS71_Ti_1( | 3.4422 | 0.3526 | 1562.52 | 1561.796 | 6103.4  | 1                                                                                       | 1004   | 70.8 | 1  | R.DITLFHAMDTLQR.N                     |
| *             | HsFlag-VPS71_Ti_1( | 3.7803 | 0.328  | 2173.87 | 2173.35  | 7682.6  | 1                                                                                       | 888    | 50   | 1  | R.GHLRPEAQSLSPYTTSANR.A               |



|             |                    |        |        |         |          |         |   |        |      |   |                                                                  |
|-------------|--------------------|--------|--------|---------|----------|---------|---|--------|------|---|------------------------------------------------------------------|
| *           | HsSrcap_Ti_203.162 | 3.2389 | 0.1097 | 1182.38 | 1180.433 | 7443.7  | 1 | 1433.8 | 85   | 2 | K.DLVAQAPLKPK.T                                                  |
| *           | HsSrcap_Ti_202.244 | 3.0934 | 0.357  | 1654.57 | 1653.919 | 5600.4  | 1 | 737.2  | 63.3 | 1 | K.LNPADAPNPVVFVATK.D                                             |
| gi 66346679 | r                  | 6      | 9      | 18.90%  | 408      | 44965   |   |        |      |   | 8.6 SERPINE1 mRNA binding protein 1 isoform 1 [Homo sapiens]     |
| gi 66346685 | r                  | 6      | 9      | 19.90%  | 387      | 42427   |   |        |      |   | 8.4 SERPINE1 mRNA binding protein 1 isoform 4 [Homo sapiens]     |
| gi 66346683 | r                  | 6      | 9      | 19.60%  | 393      | 43135   |   |        |      |   | 8.4 SERPINE1 mRNA binding protein 1 isoform 3 [Homo sapiens]     |
| gi 66346681 | r                  | 6      | 9      | 19.20%  | 402      | 44257   |   |        |      |   | 8.7 SERPINE1 mRNA binding protein 1 isoform 2 [Homo sapiens]     |
|             | HsFlag-NUFIP_Ti_1C | 5.0263 | 0.4505 | 1944.75 | 1945.089 | 7334.8  | 1 | 2405.7 | 83.3 | 2 | R.FDQLFDESDFEVLK.A                                               |
|             | HsFLAG-TCF3_Ti_1C  | 3.7444 | 0.3675 | 1460.46 | 1461.531 | 7805    | 1 | 958.6  | 56.7 | 1 | K.SAAQAAAQTNSNAAGK.Q                                             |
|             | HsFLAG-p53-DNA-D   | 3.4864 | 0.1871 | 1368.66 | 1368.616 | 5829.8  | 5 | 655    | 68.2 | 2 | K.KEETQPPVALKK.E                                                 |
|             | HsFlag-NUFIP_Ti_1C | 3.931  | 0.2295 | 1256.65 | 1256.361 | 8796.1  | 1 | 1329.7 | 80   | 2 | R.RPDQQLQGEGK.I                                                  |
|             | HsFLAG-p53-DNA-D   | 3.033  | 0.0895 | 1176.46 | 1176.358 | 6890.1  | 4 | 1003.9 | 87.5 | 1 | R.RFEKPLEEK.G                                                    |
|             | HsFLAG-Lin9_Ti_202 | 3.0367 | 0.1481 | 1518.6  | 1516.602 | 9491.4  | 3 | 675.3  | 54.2 | 1 | K.ENEVEEVKEEGPK.E                                                |
| gi 7705805  | re                 | 2      | 3      | 18.90%  | 296      | 33249   |   |        |      |   | 9.3 mitochondrial ribosomal protein S2 [Homo sapiens]            |
| *           | HsFlag-NUFIP_Ti_1C | 5.0343 | 0.5595 | 4186.35 | 4188.64  | 8238.9  | 1 | 793.1  | 24.3 | 2 | K.MNIPTVGIVDTNCNPCLITYVPGNDDSPHAVHLYCR.L                         |
| *           | HsFlag-NUFIP_Ti_1C | 3.8188 | 0.3452 | 1900.37 | 1901.017 | 5614.4  | 1 | 426.1  | 50   | 1 | K.EPGDQGPAPPPGADMSHSL.-                                          |
| gi 4505119  | re                 | 2      | 3      | 18.90%  | 291      | 32844   |   |        |      |   | 5.3 methyl-CpG binding domain protein 3 [Homo sapiens]           |
| *           | HsSrcap_Ti_204.362 | 3.7358 | 0.3286 | 1747.02 | 1748.029 | 8254.6  | 1 | 770.8  | 53.3 | 2 | K.KLSGLNAFDIAEELVK.T                                             |
| *           | HsSrcap_Ti_203.488 | 4.2047 | 0.2723 | 3884.17 | 3884.357 | 5862.5  | 1 | 489.6  | 21.1 | 1 | K.GLQGVGPGCTDETLLSAIASALHTSTMPITGQLSAAVEK.N                      |
| gi 4507127  | re                 | 3      | 12     | 18.90%  | 159      | 17394   |   |        |      |   | 9.7 small nuclear ribonucleoprotein polypeptide C [Homo sapiens] |
| *           | HsFlag-VPS71_Ti_1C | 4.8225 | 0.3963 | 2299.76 | 2300.375 | 7780.1  | 1 | 1880.4 | 67.6 | 7 | K.FYCDYCDTYLTHDSPSVR.K                                           |
| *           | HsSrcap_Ti_202.212 | 3.8683 | 0.3606 | 2300.74 | 2300.375 | 4077.2  | 1 | 672.9  | 41.2 | 2 | K.FYCDYCDTYLTHDSPSVR.K                                           |
| *           | HsFlag-VPS71_Ti_1C | 4.7551 | 0.2307 | 1479.6  | 1478.66  | 6411.8  | 1 | 2148   | 90.9 | 3 | K.WMEEQAQSLIDK.T                                                 |
| gi 88953190 | r                  | 3      | 13     | 18.90%  | 132      | 14501   |   |        |      |   | 7.2 PREDICTED: similar to ribosomal protein S12 [Homo sapiens]   |
| gi 88955046 | r                  | 3      | 13     | 18.90%  | 132      | 14502   |   |        |      |   | 6.8 PREDICTED: similar to ribosomal protein S12 [Homo sapiens]   |
|             | HsFLAG-ARP8_Ti_2   | 5.2084 | 0.0988 | 1752.53 | 1753.015 | 7995.1  | 1 | 1992.1 | 78.6 | 1 | K.LVEALCAEHQIDLIK.V                                              |
|             | HsFlag-NUFIP_Ti_1C | 3.2132 | 0.3059 | 1189.76 | 1190.394 | 5456.5  | 1 | 707    | 72.2 | 3 | K.KLGEWVGLCK.T                                                   |
|             | HsFlag-NUFIP_Ti_1C | 3.5234 | 0.3303 | 1190.63 | 1190.394 | 5208.3  | 1 | 1103.3 | 88.9 | 9 | K.KLGEWVGLCK.T                                                   |
| gi 10835165 | r                  | 2      | 9      | 18.80%  | 128      | 14177   |   |        |      |   | 6.5 CD59 antigen p18-20 [Homo sapiens]                           |
| gi 42761474 | r                  | 2      | 9      | 18.80%  | 128      | 14177   |   |        |      |   | 6.5 CD59 antigen p18-20 [Homo sapiens]                           |
| gi 42716302 | r                  | 2      | 9      | 18.80%  | 128      | 14177   |   |        |      |   | 6.5 CD59 antigen p18-20 [Homo sapiens]                           |
| gi 42716299 | r                  | 2      | 9      | 18.80%  | 128      | 14177   |   |        |      |   | 6.5 CD59 antigen p18-20 [Homo sapiens]                           |
|             | HsFLAG-ARP6_Ti_1C  | 4.111  | 0.3687 | 1540.38 | 1540.598 | 5767.8  | 1 | 1270.2 | 86.4 | 7 | K.FEHCNFDVTR.L                                                   |
|             | HsFLAG-ARP6_Ti_1C  | 4.6378 | 0.4188 | 1648.68 | 1649.773 | 8122.4  | 1 | 1987   | 86.4 | 2 | R.LRENELTYCCK.K                                                  |
| gi 38327634 | r                  | 8      | 33     | 18.70%  | 670      | 75407   |   |        |      |   | 9.5 DEAD (Asp-Glu-Ala-Asp) box polypeptide 18 [Homo sapiens]     |
| *           | HsFLAG-FLJ20309_   | 3.7297 | 0.2141 | 1527.44 | 1527.931 | 4644.9  | 4 | 696.5  | 69.2 | 6 | K.TLAFLIPAVELIVK.L                                               |
| *           | HsFLAG-Lin9_Ti_202 | 3.0875 | 0.0946 | 1395    | 1395.645 | 12131.1 | 5 | 1102.1 | 53.8 | 1 | K.LGNGINIIVATPGR.L                                               |
| *           | HsFLAG-FLJ20729_   | 4.0243 | 0.3072 | 1695.53 | 1695.992 | 9892.1  | 1 | 1413.2 | 69.2 | 2 | R.LLDHMQNTPGFMYK.N                                               |
| *           | HsFLAG-Lin9_Ti_202 | 3.9236 | 0.3429 | 1446.23 | 1446.566 | 9604.8  | 1 | 1793.1 | 81.8 | 3 | K.NLQCLVIDEADR.I                                                 |
| *           | HsFLAG-FLJ20729_   | 4.2422 | 0.2907 | 2311.33 | 2312.538 | 5294.6  | 1 | 647.6  | 50   | 4 | R.GLDIPEVDWIVQYDPPDDPK.E                                         |
| *           | HsFLAG-p53-DNA-D   | 4.0279 | 0.2418 | 1835.62 | 1835.203 | 8335.9  | 1 | 1188.4 | 60   | 8 | R.GHALLLRPEELGFLR.Y                                              |
| *           | HsFLAG-Lin9_Ti_202 | 5.283  | 0.4352 | 2265.33 | 2264.632 | 7882.2  | 1 | 1184.4 | 57.9 | 8 | K.QIFNVNLLNPQVALSFGFK.V                                          |
| *           | HsFLAG-FLJ20729_   | 2.9391 | 0.362  | 1630.94 | 1629.81  | 6536.2  | 1 | 953.8  | 64.3 | 1 | K.VPPFVDLNVNSNEGK.Q                                              |
| gi 46367787 | r                  | 8      | 33     | 18.70%  | 636      | 70671   |   |        |      |   | 9.5 poly(A) binding protein, cytoplasmic 1 [Homo sapiens]        |

|                |                    |        |        |         |          |         |   |        |      |    |                                                                                              |
|----------------|--------------------|--------|--------|---------|----------|---------|---|--------|------|----|----------------------------------------------------------------------------------------------|
|                | HsFLAG-ARP6_Ti_1   | 3.0589 | 0.308  | 1929.23 | 1930.084 | 9460.6  | 1 | 1041   | 53.1 | 1  | R.SLGYAYVNFQQPADAER.A                                                                        |
|                | HsFLAG-ARP6_Ti_1   | 3.0592 | 0.2797 | 1267.66 | 1267.483 | 5025.5  | 1 | 890.6  | 80   | 1  | R.ALDTMNFQVVIK.G                                                                             |
|                | HsFLAG-ARP6_Ti_1   | 4.5583 | 0.3978 | 1807.79 | 1808.007 | 7833.5  | 1 | 1601.2 | 70   | 1  | K.ALYDTFSAFGNLSCK.V                                                                          |
| *              | HsFLAG-ARP6_Ti_1   | 4.2223 | 0.4991 | 1741.53 | 1741.857 | 6700    | 1 | 1406.3 | 71.4 | 3  | K.GYGFVHFETQEAER.A                                                                           |
|                | HsFLAG-ARP6_Ti_1   | 3.6131 | 0.4405 | 1663.85 | 1663.79  | 5123.3  | 1 | 681.7  | 57.1 | 3  | K.GFGFVCFSSPEEATK.A                                                                          |
|                | HsFLAG-ARP6_Ti_1   | 4.0405 | 0.3767 | 1543.47 | 1543.893 | 2806.3  | 1 | 566.6  | 76.9 | 11 | R.IVATKPLYVALAQR.K                                                                           |
|                | HsFLAG-ARP6_Ti_1   | 4.7173 | 0.4431 | 1637.21 | 1638.024 | 5919.7  | 1 | 1882.9 | 85.7 | 6  | R.LFPLIQAMHPTLAGK.I                                                                          |
|                | HsFLAG-TCF3_Ti_1   | 5.1211 | 0.4253 | 1694.51 | 1694.928 | 8006.8  | 1 | 2427.4 | 80   | 7  | R.SKVDEAVAVLQAHQAK.E                                                                         |
| gij 14028877 r |                    | 2      | 4      | 18.50%  | 173      | 20116   |   |        |      |    | 8.8 mitochondrial ribosomal protein S25 [Homo sapiens]                                       |
| *              | HsFLAG-ARP6_Ti_1   | 3.5564 | 0.3569 | 1545    | 1544.836 | 7544.9  | 1 | 1536.6 | 86.4 | 2  | K.FVFFNIPQIQYK.N                                                                             |
| *              | HsFlag-NUFIP_Ti_1C | 4.4758 | 0.4166 | 2312.04 | 2312.564 | 4005.6  | 1 | 661.9  | 52.6 | 2  | R.ECICEVEGVQVPCPSLVPLPK.E                                                                    |
| gij 18105007 r |                    | 22     | 55     | 18.40%  | 2225     | 242981  |   |        |      |    | 6.5 carbamoylphosphate synthetase 2/aspartate transcarbamylase/dihydroorotase [Homo sapiens] |
| *              | HsSrcap_Ti_206.272 | 4.5749 | 0.4988 | 2286.83 | 2286.555 | 6434.3  | 1 | 860.9  | 55.3 | 1  | R.TLHEWLQQHGIPGLQGVDTR.E                                                                     |
| *              | HsSrcap_Ti_202.413 | 4.6951 | 0.4428 | 4449.92 | 4449.831 | 6656.3  | 1 | 448.8  | 19.5 | 2  | LSR.V                                                                                        |
| *              | HsFLAG-ARP6_Ti_1   | 3.7982 | 0.136  | 3023.18 | 3024.442 | 12652.1 | 1 | 1086.7 | 25.9 | 1  | K.ALKEENIQTLINPNIAIVQTSQGLADK.V                                                              |
| *              | HsFLAG-ARP6_Ti_1   | 3.4266 | 0.3399 | 1946.68 | 1947.331 | 4464.3  | 1 | 1131.3 | 76.7 | 3  | K.VYFLPITPHYVTQVIR.N                                                                         |
| *              | HsFLAG-ARP6_Ti_1   | 4.5793 | 0.3433 | 2681.19 | 2681.894 | 9006.4  | 1 | 1300.4 | 32   | 2  | R.MAEIGEHVAPSEAANSLEQAQAAAER.L                                                               |
| *              | HsFLAG-ARP6_Ti_1   | 5.8639 | 0.3482 | 3703.54 | 3704.177 | 4745.3  | 1 | 628.8  | 25   | 20 | R.AAFALGGLGSGFASNREELSALVAPAFHTSQVLVDK.S                                                     |
| *              | HsFLAG-ARP6_Ti_1   | 3.6646 | 0.3709 | 2103.32 | 2102.271 | 5493.4  | 1 | 634.4  | 52.6 | 1  | R.NSVTGGTAAFEPSVDYCVVK.I                                                                     |
| *              | HsFLAG-ARP6_Ti_1   | 4.1681 | 0.3792 | 1428.91 | 1429.665 | 9071.4  | 1 | 1613.6 | 77.3 | 1  | R.IIAHAQLLEQHR.G                                                                             |
| *              | HsFLAG-ARP6_Ti_1   | 3.1961 | 0.2408 | 1486.64 | 1484.779 | 5432.9  | 1 | 496.7  | 57.7 | 1  | K.QIALAVLSTELAVR.K                                                                           |
| *              | HsFLAG-ARP6_Ti_1   | 3.2615 | 0.2992 | 1398.9  | 1398.648 | 4128.9  | 1 | 1011   | 83.3 | 1  | R.TPHVLVLGSGVYR.I                                                                            |
| *              | HsFLAG-ARP6_Ti_1   | 4.6741 | 0.3106 | 1527.54 | 1527.764 | 6301.3  | 1 | 1755.2 | 87.5 | 2  | R.LLDTIGISQPQWR.E                                                                            |
| *              | HsSrcap_Ti_204.467 | 4.6331 | 0.2808 | 4384.87 | 4384.798 | 8819.6  | 1 | 760.7  | 18.6 | 1  | TAK.T                                                                                        |
| *              | HsSrcap_Ti_205.339 | 4.7069 | 0.4318 | 2446.49 | 2447.883 | 9715.8  | 1 | 1297.1 | 50   | 5  | K.AIVHAVGQELQVTGPFNLQLIAK.D                                                                  |
| *              | HsFLAG-ARP6_Ti_1   | 4.2987 | 0.1219 | 2447.93 | 2447.883 | 7530.3  | 1 | 1221.3 | 37.5 | 1  | K.AIVHAVGQELQVTGPFNLQLIAK.D                                                                  |
| *              | HsSrcap_Ti_205.331 | 4.5707 | 0.4083 | 3049.75 | 3047.525 | 8805.8  | 1 | 920.9  | 28.7 | 2  | K.AIVHAVGQELQVTGPFNLQLIAKDDQLK.V                                                             |
| *              | HsFLAG-ARP6_Ti_1   | 4.536  | 0.4527 | 2188.61 | 2188.603 | 4631.3  | 1 | 1285.3 | 66.7 | 2  | R.VIMGEEVPEVGLMTGSGVGVK.V                                                                    |
| *              | HsFLAG-ARP6_Ti_1   | 3.4896 | 0.3574 | 1651.44 | 1651.002 | 5813.7  | 1 | 1422   | 70   | 1  | K.LFVEALGQIGPAPPLK.V                                                                         |
| *              | HsFLAG-ARP6_Ti_1   | 2.8327 | 0.2738 | 1205.2  | 1205.337 | 3947    | 3 | 684.2  | 83.3 | 1  | K.VHVDCMYSQK.L                                                                               |
| *              | HsFLAG-ARP6_Ti_1   | 2.7569 | 0.2796 | 1201.25 | 1201.327 | 3704.4  | 1 | 729.9  | 83.3 | 3  | K.AHWTPFEGQK.V                                                                               |
| *              | HsFLAG-ARP6_Ti_1   | 3.2166 | 0.3173 | 1668.89 | 1669.899 | 8362.2  | 1 | 1342.9 | 69.2 | 1  | K.DQMSHLFNAHTLR.M                                                                            |
| *              | HsSrcap_Ti_205.161 | 2.6536 | 0.2488 | 1218.46 | 1218.398 | 5336.3  | 1 | 479.9  | 68.2 | 1  | R.HPQPGAVELAANK.H                                                                            |
| *              | HsFLAG-ARP6_Ti_1   | 4.0357 | 0.3145 | 1564.56 | 1562.775 | 6922.7  | 1 | 1856.6 | 83.3 | 2  | R.TVHSLACLLTQYR.V                                                                            |
| gij 6912542 re |                    | 12     | 42     | 18.40%  | 495      | 56369   |   |        |      |    | 9.2 nuclear fragile X mental retardation protein interacting protein 1 [Homo sapiens]        |
| *              | HsFlag-NUFIP_Ti_2C | 3.0368 | 0.1779 | 1167.23 | 1167.307 | 5026.9  | 1 | 857.2  | 88.9 | 1  | K.FTDFSLPPSR.K                                                                               |
| *              | HsFlag-NUFIP_Ti_2C | 2.6411 | 0.2124 | 1295.19 | 1295.481 | 3955.9  | 1 | 357.5  | 65   | 1  | K.FTDFSLPPSRK.Q                                                                              |
| *              | HsFlag-NUFIP_Ti_2C | 2.9498 | 0.3623 | 1729.8  | 1730.806 | 5769.2  | 1 | 500.4  | 62.5 | 3  | K.EPVFHFCDTCDR.G                                                                             |
| *              | HsFlag-NUFIP_Ti_2C | 4.6365 | 0.3035 | 1593.59 | 1594.65  | 7066.2  | 1 | 1180.8 | 75   | 7  | K.CPELDCSFTAHEK.I                                                                            |
| *              | HsFLAG-TIP49a_Ti_  | 2.1154 | 0.3154 | 885.25  | 886.075  | 3906.8  | 6 | 320.7  | 64.3 | 2  | R.NMHAPGMK.K                                                                                 |
| *              | HsFlag-NUFIP_Ti_2C | 2.6069 | 0.1296 | 1045.2  | 1044.15  | 5324.7  | 3 | 804.1  | 93.8 | 1  | K.LDTPPEIAR.W                                                                                |
| *              | HsFlag-NUFIP_Ti_2C | 2.2721 | 0.2914 | 1294.54 | 1295.481 | 3388.2  | 7 | 213.5  | 59.1 | 2  | K.RGAVLTTTQYGK.M                                                                             |
| *              | HsFlag-NUFIP_Ti_2C | 4.2133 | 0.3231 | 1297.17 | 1295.481 | 8452.1  | 1 | 1825   | 81.8 | 8  | K.RGAVLTTTQYGK.M                                                                             |

|               |                    |        |        |         |          |                                                                                        |   |        |      |   |                                        |
|---------------|--------------------|--------|--------|---------|----------|----------------------------------------------------------------------------------------|---|--------|------|---|----------------------------------------|
| *             | HsFLAG-TIP49a_Ti_  | 2.2468 | 0.1253 | 1344.26 | 1345.461 | 4480.6                                                                                 | 5 | 344.8  | 50   | 1 | R.AVTGSGSHLCDLK.L                      |
| *             | HsFLAG-TIP49a_Ti_  | 3.6492 | 0.2511 | 1346.17 | 1345.461 | 6231.3                                                                                 | 1 | 908.7  | 66.7 | 9 | R.AVTGSGSHLCDLK.L                      |
| *             | HsFLAG-TIP49a_Ti_  | 3.2442 | 0.2514 | 1582.56 | 1583.7   | 3813.5                                                                                 | 1 | 392.7  | 63.6 | 2 | K.DYHNYQTLFEPR.T                       |
| *             | HsFlag-NUFIP_Ti_2C | 4.0014 | 0.2576 | 1583.06 | 1583.7   | 8177.7                                                                                 | 1 | 1163.8 | 72.7 | 5 | K.DYHNYQTLFEPR.T                       |
| gi 5453539 re | 4                  | 6      | 18.40% | 425     | 47079    | 7.2 phosphoribosylaminoimidazole carboxylase [Homo sapiens]                            |   |        |      |   |                                        |
| *             | HsFLAG-ARP6_Ti_1   | 3.9152 | 0.256  | 1721.29 | 1722.001 | 8813.6                                                                                 | 1 | 1263.4 | 64.3 | 3 | K.ITSCIFQLLQEAGIK.T                    |
| *             | HsFLAG-ARP6_Ti_1   | 3.2707 | 0.3242 | 1733.36 | 1732.956 | 7281.4                                                                                 | 1 | 703.9  | 53.3 | 1 | R.VVFLMGSTSDLGHCCK.I                   |
| *             | HsFLAG-p53-DNA-D   | 3.0976 | 0.2708 | 1411.59 | 1411.558 | 4878.1                                                                                 | 2 | 417.3  | 54.2 | 1 | R.VTSAHKGPDETLR.I                      |
| *             | HsFLAG-ARP8_Ti_2   | 4.6424 | 0.1415 | 3562.78 | 3560.998 | 10741.7                                                                                | 1 | 938.9  | 22.7 | 1 | R.LPSGLGCSTVLSPEGSAQFAAQIFGLSNHLVWSK.L |
| gi 4885063 re | 5                  | 16     | 18.40% | 364     | 39456    | 6.9 fructose-bisphosphate aldolase C [Homo sapiens]                                    |   |        |      |   |                                        |
| *             | HsFlag-VPS71_Ti_1C | 5.5085 | 0.1357 | 2272.92 | 2274.447 | 5367.9                                                                                 | 1 | 699.8  | 52.3 | 1 | K.GVVPLAGTDGETTTQGLDGLSER.C            |
|               | HsFlag-VPS71_Ti_1C | 4.0335 | 0.3068 | 3022.16 | 3022.348 | 5181.6                                                                                 | 2 | 408.1  | 36.5 | 3 | R.YASICQQNGIVPIVEPEILPDGDHDLK.R        |
|               | HsFlag-VPS71_Ti_1C | 5.5709 | 0.2217 | 3022.85 | 3022.348 | 6479.9                                                                                 | 2 | 791.7  | 30.8 | 6 | R.YASICQQNGIVPIVEPEILPDGDHDLK.R        |
|               | HsH2AZ-FLAG_293_   | 1.9697 | 0.1264 | 763.69  | 763.955  | 6757.4                                                                                 | 3 | 659.4  | 75   | 4 | K.VLAAVYK.A                            |
|               | HsFlag-VPS71_Ti_1C | 3.5725 | 0.2934 | 1198.81 | 1198.367 | 5068.6                                                                                 | 1 | 1115.9 | 88.9 | 2 | R.PWALTFYSYGR.A                        |
| gi 4506609 re | 6                  | 18     | 18.40% | 196     | 23466    | 11.5 ribosomal protein L19 [Homo sapiens]                                              |   |        |      |   |                                        |
| *             | HsFLAG-ARP6_Ti_1   | 5.6615 | 0.4915 | 2070.48 | 2072.242 | 3782.6                                                                                 | 1 | 1121.4 | 76.5 | 1 | K.KVWLDPNETNEIANANSR.Q                 |
| *             | HsFLAG-ARP6_Ti_1   | 3.8022 | 0.2483 | 2072.4  | 2072.242 | 6850.1                                                                                 | 3 | 702.2  | 35.3 | 1 | K.KVWLDPNETNEIANANSR.Q                 |
| *             | HsFlag-NUFIP_Ti_1C | 4.6806 | 0.4358 | 1943.1  | 1944.068 | 6976.1                                                                                 | 1 | 1530.8 | 71.9 | 4 | K.VWLDPNETNEIANANSR.Q                  |
|               | HsFLAG-TCF3_Ti_1C  | 2.4383 | 0.1493 | 923.58  | 924.091  | 3542.2                                                                                 | 5 | 229.1  | 71.4 | 6 | R.KPVTVHSR.A                           |
|               | HsFLAG-TCF3_Ti_1C  | 2.4727 | 0.2212 | 1114.69 | 1115.275 | 6134.6                                                                                 | 2 | 495.8  | 66.7 | 3 | K.KLLADQAEAR.R                         |
|               | HsFlag-NUFIP_Ti_1C | 3.93   | 0.1888 | 1115.56 | 1115.275 | 7096.2                                                                                 | 1 | 1799.9 | 94.4 | 3 | K.KLLADQAEAR.R                         |
| gi 48928058 r | 2                  | 3      | 18.40% | 103     | 11637    | 5.5 small ubiquitin-like modifier protein 3 [Homo sapiens]                             |   |        |      |   |                                        |
| gi 89062887 r | 2                  | 3      | 20.00% | 95      | 10814    | 7.4 PREDICTED: similar to SMT3 suppressor of mif two 3 homolog 2 [Homo sapiens]        |   |        |      |   |                                        |
| gi 89060987 r | 2                  | 3      | 11.90% | 160     | 17755    | 6.3 PREDICTED: similar to SMT3 suppressor of mif two 3 homolog 2 [Homo sapiens]        |   |        |      |   |                                        |
| gi 89060008 r | 2                  | 3      | 11.90% | 160     | 17755    | 6.3 PREDICTED: similar to SMT3 suppressor of mif two 3 homolog 2 [Homo sapiens]        |   |        |      |   |                                        |
| gi 89026922 r | 2                  | 3      | 20.00% | 95      | 10814    | 7.4 PREDICTED: similar to SMT3 suppressor of mif two 3 homolog 2 [Homo sapiens]        |   |        |      |   |                                        |
| gi 89024911 r | 2                  | 3      | 20.00% | 95      | 10814    | 7.4 PREDICTED: similar to SMT3 suppressor of mif two 3 homolog 2 [Homo sapiens]        |   |        |      |   |                                        |
| gi 54792071 r | 2                  | 3      | 26.80% | 71      | 8111     | 5.4 small ubiquitin-like modifier 2 isoform b precursor [Homo sapiens]                 |   |        |      |   |                                        |
| gi 54792069 r | 2                  | 3      | 20.00% | 95      | 10871    | 5.5 small ubiquitin-like modifier 2 isoform a precursor [Homo sapiens]                 |   |        |      |   |                                        |
|               | HsFLAG-Lin9_Ti_20  | 2.9752 | 0.1648 | 1236.07 | 1235.382 | 7731.2                                                                                 | 2 | 973.8  | 68.2 | 1 | K.VAQDGSVVQFK.I                        |
|               | HsFLAG-Lin9_Ti_20  | 2.8395 | 0.087  | 838.91  | 838.985  | 7791.2                                                                                 | 2 | 1060   | 100  | 2 | K.RHTPLSK.L                            |
| gi 4502303 re | 2                  | 4      | 18.30% | 213     | 23277    | 10 mitochondrial ATP synthase, O subunit precursor [Homo sapiens]                      |   |        |      |   |                                        |
| *             | HsFLAG-ARP6_Ti_1   | 3.413  | 0.2906 | 1873.54 | 1874.147 | 7773.7                                                                                 | 1 | 692.3  | 50   | 2 | R.FSPLTTNLINLLAENGR.L                  |
| *             | HsFLAG-ARP6_Ti_1   | 2.7803 | 0.2958 | 2318.29 | 2319.534 | 5896.9                                                                                 | 1 | 407.4  | 38.1 | 2 | R.GEVPCVTVSASPLEEATLSELK.T             |
| gi 19913428 r | 6                  | 8      | 18.20% | 511     | 56501    | 5.8 ATPase, H+ transporting, lysosomal 56/58kD, V1 subunit B, isoform 2 [Homo sapiens] |   |        |      |   |                                        |
| *             | HsFLAG-ARP6_Ti_1   | 3.3263 | 0.2449 | 2000.45 | 2001.293 | 5536.4                                                                                 | 5 | 428.8  | 42.9 | 1 | R.GIVNGAAPELVPVTPGGPAVGAR.E            |
| *             | HsFLAG-ARP6_Ti_1   | 2.6947 | 0.2944 | 1649.63 | 1648.943 | 5265.4                                                                                 | 2 | 349.7  | 43.3 | 1 | K.TVSGVNGPLVILDHVK.F                   |
| *             | HsFLAG-ARP6_Ti_1   | 4.8506 | 0.2906 | 2410.54 | 2410.763 | 10063.1                                                                                | 1 | 1552.4 | 52.4 | 2 | R.IYPEEMIQTGISAIDGMNSIAR.G             |
|               | HsFLAG-ARP6_Ti_1   | 3.2549 | 0.2484 | 2180.28 | 2179.493 | 3727.4                                                                                 | 1 | 385.5  | 50   | 1 | K.IPIFSAAGLPHNEIAAQICR.Q               |
|               | HsFLAG-ARP6_Ti_1   | 4.6346 | 0.429  | 2180.59 | 2179.493 | 6682.9                                                                                 | 1 | 1722   | 47.4 | 2 | K.IPIFSAAGLPHNEIAAQICR.Q               |
| *             | HsFLAG-ARP6_Ti_1   | 2.8562 | 0.0972 | 1594.38 | 1594.811 | 6402                                                                                   | 1 | 745.4  | 58.3 | 1 | K.RIPQSTLSEFYPR.D                      |
| gi 42544123 r | 8                  | 21     | 18.10% | 548     | 59712    | 9.5 splicing factor 1 isoform 3 [Homo sapiens]                                         |   |        |      |   |                                        |

|             |                   |        |        |         |          |        |                                                                                                  |        |      |    |                                      |
|-------------|-------------------|--------|--------|---------|----------|--------|--------------------------------------------------------------------------------------------------|--------|------|----|--------------------------------------|
| gi 42544130 | r                 | 8      | 21     | 15.50%  | 639      | 68330  | 9 splicing factor 1 isoform 1 [Homo sapiens]                                                     |        |      |    |                                      |
| gi 42544125 | r                 | 8      | 21     | 15.50%  | 638      | 68633  | 9.2 splicing factor 1 isoform 2 [Homo sapiens]                                                   |        |      |    |                                      |
|             | HsFLAG-p53-DNA-D  | 2.93   | 0.3099 | 1649.51 | 1650.032 | 5042.6 | 1                                                                                                | 591.5  | 53.3 | 1  | K.TVIPGMPTVIPPLTR.E                  |
|             | HsARP6-FLAG_Ti_1  | 2.6753 | 0.1248 | 1562.38 | 1562.806 | 8780.7 | 3                                                                                                | 1078.1 | 66.7 | 1  | R.AYIVQLQIEDLTR.K                    |
|             | HsFlag-VPS71_Ti_1 | 5.9685 | 0.5456 | 2937.4  | 2937.386 | 7196   | 1                                                                                                | 1238.7 | 35   | 2  | R.HNLITEMVALNPDFKPPADYKPPATR.V       |
|             | HsFLAG-p53-DNA-D  | 4.9347 | 0.3723 | 2401.39 | 2401.826 | 5345.7 | 1                                                                                                | 879.7  | 57.5 | 3  | K.VMIPQDEYPEINFVGLLIGPR.G            |
|             | HsFlag-VPS71_Ti_1 | 5.1074 | 0.2923 | 2402.49 | 2401.826 | 8326.1 | 1                                                                                                | 2558.8 | 46.2 | 7  | K.VMIPQDEYPEINFVGLLIGPR.G            |
|             | HsFlag-VPS71_Ti_1 | 1.9711 | 0.2148 | 1124.44 | 1125.23  | 5709.3 | 7                                                                                                | 335.6  | 61.1 | 1  | R.SITNTTVCTK.C                       |
|             | HsFlag-VPS71_Ti_1 | 2.5483 | 0.1384 | 1125.38 | 1125.23  | 6062.2 | 3                                                                                                | 749.7  | 77.8 | 2  | R.SITNTTVCTK.C                       |
|             | HsFLAG-p53-DNA-D  | 4.2015 | 0.3738 | 1473.77 | 1474.573 | 3708.8 | 2                                                                                                | 657.7  | 75   | 4  | K.FQRPQDPQSAQDK.A                    |
| gi 42476281 | r                 | 3      | 6      | 18.00%  | 294      | 31566  | 7.6 voltage-dependent anion channel 2 [Homo sapiens]                                             |        |      |    |                                      |
| gi 88955151 | r                 | 3      | 6      | 18.10%  | 293      | 31445  | 7.6 PREDICTED: similar to voltage-dependent anion channel 2 [Homo sapiens]                       |        |      |    |                                      |
| gi 88953242 | r                 | 3      | 6      | 18.10%  | 293      | 31479  | 7.6 PREDICTED: similar to voltage-dependent anion channel 2 [Homo sapiens]                       |        |      |    |                                      |
|             | HsFLAG-TIP49b_Ti_ | 2.6608 | 0.2457 | 1908.24 | 1908.893 | 7701.3 | 7                                                                                                | 356.1  | 38.9 | 1  | K.SCSGVEFSTSGSSNTDTGK.V              |
|             | HsFLAG-ARP6_Ti_1  | 2.817  | 0.2873 | 1557.77 | 1557.744 | 6784.3 | 3                                                                                                | 634.4  | 57.7 | 1  | K.LTFDITTFSPNTGKK.S                  |
|             | HsFLAG-ARP6_Ti_1  | 4.0312 | 0.3206 | 2103.61 | 2104.414 | 5550.4 | 1                                                                                                | 487.2  | 42.1 | 4  | K.VNNSLIGVGYQTLRPGVK.L               |
| gi 89040213 | r                 | 1      | 2      | 18.00%  | 183      | 20343  | 5.6 PREDICTED: hypothetical protein XP_934593 [Homo sapiens]                                     |        |      |    |                                      |
| *           | HsFLAG-TCF3_Ti_1  | 4.2715 | 0.2447 | 3373.83 | 3374.744 | 6138.6 | 1                                                                                                | 564.6  | 24.2 | 2  | R.YSVEASSPGHGSPLSLLPSASVPESMTISELR.Q |
| gi 20070160 | r                 | 4      | 17     | 17.70%  | 372      | 40060  | 9.8 cold shock domain protein A [Homo sapiens]                                                   |        |      |    |                                      |
|             | HsFLAG-ARP6_Ti_1  | 3.925  | 0.3759 | 1745.19 | 1745.93  | 6667.6 | 1                                                                                                | 1504.7 | 75   | 2  | R.NDKEDVFVHQTAIK.K                   |
|             | HsFlag-NUFIP_Ti_1 | 3.8133 | 0.4608 | 1797.85 | 1796.882 | 6497.5 | 1                                                                                                | 815    | 59.4 | 9  | R.SVGGETVEFDVVEGEG.K                 |
| *           | HsFlag-NUFIP_Ti_1 | 3.8893 | 0.3622 | 1784.56 | 1783.893 | 7328   | 1                                                                                                | 986.4  | 55.6 | 2  | K.GAEANVTGPDGVPVEGSR.Y               |
| *           | HsFlag-NUFIP_Ti_1 | 3.3468 | 0.3039 | 1560.66 | 1560.71  | 5644   | 1                                                                                                | 602    | 60.7 | 4  | K.DGVPEGAQLQGPVHR.N                  |
| gi 4759098  | re                | 3      | 11     | 17.70%  | 288      | 33666  | 11.2 splicing factor, arginine/serine-rich 10 (transformer 2 homolog, Drosophila) [Homo sapiens] |        |      |    |                                      |
| *           | HsFLAG-Lin9_Ti_20 | 4.5982 | 0.4821 | 2383.76 | 2385.568 | 4774.7 | 1                                                                                                | 941.9  | 57.5 | 6  | R.ANPDPNCLGVFGLSLYTTER.D             |
| *           | HsFLAG-Lin9_Ti_20 | 3.5389 | 0.1814 | 1812.07 | 1811.989 | 8848.3 | 1                                                                                                | 1113.3 | 56.7 | 4  | K.YGPIADVSIYDQQSR.R                  |
| *           | HsFLAG-ARP6_Ti_1  | 2.5692 | 0.2786 | 1621.64 | 1622.774 | 7676.5 | 1                                                                                                | 863.6  | 61.5 | 1  | R.GFAFVYFENVDDAK.E                   |
| gi 19923466 | r                 | 32     | 144    | 17.60%  | 2752     | 299676 | 12.1 splicing coactivator subunit SRm300 [Homo sapiens]                                          |        |      |    |                                      |
| *           | HsFLAG-FLJ20309_  | 4.0953 | 0.2887 | 1734.18 | 1734.866 | 7688.5 | 1                                                                                                | 977.3  | 69.2 | 2  | R.RGERPDYKGEELR.R                    |
| *           | HsFLAG-p53-DNA-D  | 2.1001 | 0.0856 | 927.64  | 928.036  | 4137.2 | 9                                                                                                | 203.6  | 62.5 | 2  | K.THTTALAGR.S                        |
| *           | HsFLAG-Lin9_Ti_20 | 4.4592 | 0.4211 | 2792.41 | 2792.933 | 8607   | 2                                                                                                | 876.3  | 27.9 | 2  | R.RGEGDAPFSEPGTTSTQRPSPETATK.Q       |
| *           | HsMRGBP-FLAG_Ti_  | 3.7999 | 0.4457 | 1720.7  | 1720.92  | 4110.7 | 1                                                                                                | 545.1  | 62.5 | 9  | R.SSTGPEPPAPTPLLAER.H                |
| *           | HsFlag-NUFIP_Ti_2 | 4.8677 | 0.3426 | 2853.18 | 2854.106 | 8918.4 | 1                                                                                                | 1158.5 | 31.5 | 3  | R.HGGSPQPLATTPLSQEVPNPPSEASPTR.D     |
| *           | HsFlag-DPCD_Ti_20 | 4.4346 | 0.5054 | 1841.18 | 1841.97  | 6182   | 1                                                                                                | 1048.5 | 61.8 | 3  | K.LPQSSSESSPPSPQPTK.V                |
| *           | HsFLAG-FLJ20729_  | 3.0355 | 0.3726 | 1897.02 | 1898.045 | 7319.1 | 1                                                                                                | 624.8  | 47.2 | 1  | R.HASSSPESPKPAPAPGSHR.E              |
| *           | HsFLAG-FLJ20729_  | 4.6321 | 0.3672 | 1897.93 | 1898.045 | 6590.9 | 1                                                                                                | 2178.3 | 52.8 | 2  | R.HASSSPESPKPAPAPGSHR.E              |
| *           | HsFLAG-ARP6_Ti_2  | 2.5594 | 0.1798 | 1019.59 | 1020.094 | 4042.5 | 1                                                                                                | 590.2  | 77.8 | 1  | R.SLSGSSPCPK.Q                       |
| *           | HsARP6-FLAG_Ti_1  | 3.133  | 0.1733 | 1396.32 | 1396.46  | 8676.2 | 1                                                                                                | 810.8  | 63.6 | 2  | R.SCFESSPDELK.S                      |
| *           | HsFLAG-ARP6_Ti_2  | 4.8206 | 0.3454 | 1879.16 | 1879.05  | 4131.1 | 1                                                                                                | 1054.8 | 70.6 | 5  | K.DSLVQSCPGSLSLCAGVK.S               |
| *           | HsFLAG-ARP6_Ti_2  | 5.73   | 0.572  | 2274.58 | 2276.378 | 3589   | 1                                                                                                | 951.9  | 67.5 | 11 | R.FQSDSSSYPTVDSNLLGQSR.L             |
| *           | HsFLAG-Lin9_Ti_20 | 4.5951 | 0.4173 | 1981.64 | 1981.258 | 7215   | 1                                                                                                | 956.3  | 62.5 | 17 | K.FSPFPVQDRPESSLVFK.D                |
| *           | HsFlag-DPCD_Ti_20 | 2.9215 | 0.2339 | 2362.83 | 2364.54  | 3938.8 | 1                                                                                                | 229.3  | 37.5 | 1  | K.EQNSALPTSSQDEELMEVVEK.S            |
| *           | HsFLAG-ARP6_Ti_1  | 3.777  | 0.4414 | 1825.19 | 1826.013 | 6856.4 | 1                                                                                                | 1148.9 | 62.5 | 10 | K.SEEPAGQLSHLSSELK.E                 |

|               |                    |        |        |         |          |        |   |        |      |                                                                          |
|---------------|--------------------|--------|--------|---------|----------|--------|---|--------|------|--------------------------------------------------------------------------|
| *             | HsFLAG-ARP6_Ti_2   | 2.8484 | 0.267  | 1855.55 | 1856.014 | 9705.2 | 1 | 609.7  | 41.2 | 1 R.NSGPLGTEMNTGFSSEVK.E                                                 |
| *             | HsFLAG-ARP6_Ti_2   | 4.9985 | 0.3839 | 1616.93 | 1617.667 | 8700.7 | 1 | 1848.8 | 70   | 2 R.SSGHSSSELSPPDAVEK.A                                                  |
| *             | HsFLAG-ARP6_Ti_2   | 4.4278 | 0.5055 | 1916.54 | 1917.144 | 5907.1 | 1 | 762.1  | 52.8 | 3 K.AGMSSNQSISSPVLDAVPR.T                                                |
| *             | HsFLAG-Lin9_Ti_20  | 2.7127 | 0.1077 | 1035.71 | 1036.222 | 4636.7 | 1 | 641.4  | 81.2 | 2 K.ALPQTPRPR.S                                                          |
| *             | HsFLAG-ARP6_Ti_2   | 3.7094 | 0.3561 | 1901.9  | 1903.013 | 5402.1 | 1 | 928.7  | 58.8 | 2 R.SGSSQELDKPSASPQER.S                                                  |
| *             | HsFlag-NUFIP_Ti_2C | 2.7361 | 0.1153 | 1526.98 | 1526.896 | 4762.8 | 5 | 375    | 50   | 1 R.MSQVPAPVPLMSLR.T                                                     |
| *             | HsFlag-DPCD_Ti_20  | 5.3137 | 0.5086 | 1414.57 | 1415.651 | 8154.8 | 1 | 2525.6 | 85.7 | 9 R.IPAASAAAMNLASAR.T                                                    |
| *             | HsARP6-FLAG_Ti_1   | 3.4017 | 0.2499 | 1426.34 | 1426.613 | 3432.4 | 1 | 539.7  | 65.4 | 4 R.TPAIPTAVNLADSR.T                                                     |
| *             | HsFlag-VPS71_Ti_1C | 3.9352 | 0.51   | 1343.89 | 1342.556 | 5348.3 | 1 | 1642.3 | 88.5 | 2 R.TPAAAAAMNLASPR.T                                                     |
| *             | HsARP6-FLAG_Ti_1   | 3.1186 | 0.3243 | 1239.09 | 1239.417 | 4085.4 | 1 | 579.1  | 70.8 | 3 R.TPTAPAVNLAGAR.T                                                      |
| *             | HsFLAG-Lin9_Ti_20  | 3.6587 | 0.4761 | 2560.64 | 2560.823 | 5440   | 1 | 348.2  | 34.6 | 2 R.TPAALAALSLTGSGTPPTAANYPSSSR.T                                        |
| *             | HsFLAG-FLJ20309_   | 3.9074 | 0.2205 | 1380.51 | 1379.559 | 3763.1 | 1 | 836.5  | 76.9 | 20 R.TPQAPASANLVGPR.S                                                    |
| *             | HsFlag-VPS71_Ti_1C | 3.8854 | 0.3463 | 1351.66 | 1352.493 | 4459.9 | 1 | 373.6  | 57.7 | 3 R.SAHATAPVNIAGSR.T                                                     |
| *             | HsFLAG-FLJ20309_   | 3.3066 | 0.3289 | 1352.27 | 1352.493 | 6083.9 | 1 | 815.5  | 65.4 | 15 R.SAHATAPVNIAGSR.T                                                    |
| *             | HsFlag-DPCD_Ti_20  | 3.7562 | 0.3063 | 1385.72 | 1386.609 | 4959   | 1 | 1292   | 84.6 | 2 R.MAPALSGANLTSR.V                                                      |
| *             | HsFLAG-ARP6_Ti_2   | 2.1511 | 0.2435 | 934.45  | 935.068  | 2965.5 | 1 | 214.4  | 71.4 | 1 R.VPLSAYER.V                                                           |
| *             | HsFLAG-TIP49b_Ti_  | 3.1    | 0.1126 | 1021.78 | 1022.152 | 5728.6 | 6 | 610.9  | 75   | 1 R.RSPQPSR.D                                                            |
| gi 9966805 re |                    | 9      | 21     | 17.60%  | 859      | 96332  |   |        |      | 9.1 DEAD (Asp-Glu-Ala-Asp) box polypeptide 24 [Homo sapiens]             |
| *             | HsYL1_Ti_101.1202. | 2.8834 | 0.2548 | 1564.43 | 1564.557 | 5728.8 | 1 | 950.9  | 69.2 | 2 K.AQAVSEEEEEEGK.S                                                      |
| *             | HsFLAG-p53-DNA-D   | 2.6483 | 0.1503 | 1219.39 | 1217.365 | 6442   | 5 | 548.9  | 63.6 | 1 K.KGLEPSQSTAAK.V                                                       |
| *             | HsFLAG-p53-DNA-D   | 3.4715 | 0.1636 | 2356.56 | 2356.814 | 5954.4 | 1 | 388.8  | 38.6 | 3 R.ALSFLGFSAPTPIQALTLPAIR.D                                             |
| *             | HsFLAG-FLJ20729_   | 4.7659 | 0.43   | 1967.49 | 1968.411 | 3413.9 | 1 | 783.6  | 71.9 | 3 K.TLAFaipMIHAVLQWQK.R                                                  |
| *             | HsFlag-DPCD_Ti_20  | 4.3907 | 0.3077 | 1864.44 | 1862.997 | 9198.4 | 1 | 1342.3 | 61.8 | 1 K.RNAAPPSNTEAPPGETR.T                                                  |
| *             | HsFLAG-Lin9_Ti_20  | 4.005  | 0.3513 | 2578.16 | 2579.737 | 8338.2 | 1 | 1094.5 | 46   | 1 K.TGGTVSDQALLFGDDDDAGEGPSSLIR.E                                        |
| *             | HsFLAG-Lin9_Ti_20  | 3.1935 | 0.1681 | 1195.55 | 1195.407 | 5748   | 1 | 564.7  | 75   | 2 R.RPEIVVATPGR.L                                                        |
| *             | HsFLAG-Lin9_Ti_20  | 3.8602 | 0.3219 | 1528.46 | 1528.748 | 6367.6 | 1 | 1183   | 75   | 4 R.HLLSQPLFTESQK.T                                                      |
| *             | HsFLAG-Lin9_Ti_20  | 4.1469 | 0.3762 | 1770.89 | 1771.067 | 4826.9 | 1 | 851.8  | 62.5 | 4 K.YPTQSGKPLLVSAPSK.S                                                   |
| gi 41327771 r |                    | 9      | 18     | 17.60%  | 820      | 95583  |   |        |      | 9.6 DEAD (Asp-Glu-Ala-Asp) box polypeptide 23 [Homo sapiens]             |
| *             | HsARP6-FLAG_Ti_1   | 3.2055 | 0.2471 | 1312.5  | 1312.549 | 2756.6 | 1 | 482.4  | 77.3 | 2 K.AQPLSLEELLAK.K                                                       |
| *             | HsFlag-ZnF-HIT2_Ti | 2.7407 | 0.1611 | 1236.55 | 1236.42  | 5463   | 1 | 790.3  | 83.3 | 2 K.ERHQVQLLGR.G                                                         |
| *             | HsFLAG-FLJ20729_   | 4.7963 | 0.3309 | 1898.16 | 1898.382 | 4038   | 1 | 991.5  | 71.9 | 7 K.TAAFLIPLLWITTLPK.I                                                   |
| *             | HsFlag-VPS71_Ti_1C | 3.0528 | 0.1473 | 2258.48 | 2258.536 | 6813.4 | 4 | 507.2  | 44.7 | 1 K.IDRIEESDQGPYAILAPTR.E                                                |
| *             | HsFlag-ZnF-HIT2_Ti | 4.436  | 0.3386 | 2523.98 | 2523.731 | 6910.6 | 1 | 1662.8 | 42.9 | 1 K.ILEHMPVSNQKPDDEADPEK.M                                               |
| *             | HsARP6-FLAG_Ti_1   | 4.387  | 0.3418 | 2269.9  | 2269.732 | 7952.3 | 1 | 1551.6 | 42.1 | 2 K.LLAILEQGFDPPIIFVNQK.K                                                |
| *             | HsFlag-ZnF-HIT2_Ti | 2.9357 | 0.1974 | 2272.11 | 2269.733 | 5593.6 | 1 | 454    | 44.7 | 1 K.LLAILEQGFDPPIIFVNQK.K                                                |
| *             | HsFlag-VPS71_Ti_1C | 2.9199 | 0.3075 | 1308.66 | 1309.449 | 9571.8 | 1 | 947.5  | 68.2 | 1 K.MGYNACTLHGK.G                                                        |
| *             | HsFLAG-p53-DNA-D   | 3.6413 | 0.2264 | 3336.58 | 3337.723 | 5577.3 | 1 | 451.6  | 24.2 | 1 K.QAILESPVSSCPPELANHPDAQHKPGTILTK.K                                    |
| gi 21327708 r |                    | 3      | 9      | 17.60%  | 391      | 45374  |   |        |      | 4.5 nucleosome assembly protein 1-like 1 [Homo sapiens]                  |
| gi 4758756 re |                    | 3      | 9      | 17.60%  | 391      | 45374  |   |        |      | 4.5 nucleosome assembly protein 1-like 1 [Homo sapiens]                  |
|               | HsH2AZ-FLAG_293_   | 4.5432 | 0.4097 | 1860.25 | 1861.102 | 4916.5 | 1 | 1003.1 | 68.8 | 6 R.LDGLVETPTGYIESLPR.V                                                  |
|               | HsH2AZ-FLAG_293_   | 3.7752 | 0.2178 | 1358.75 | 1357.592 | 5528.8 | 1 | 1187.2 | 85   | 2 K.YAVLYQPLFDK.R                                                        |
|               | HsFLAG-TCF3_Ti_1C  | 3.564  | 0.4069 | 4516.85 | 4517.862 | 4304.2 | 1 | 543.8  | 22.5 | 1 .E                                                                     |
| gi 5453634 re |                    | 4      | 9      | 17.50%  | 492      | 54099  |   |        |      | 6.4 dynein, cytoplasmic, light intermediate polypeptide 2 [Homo sapiens] |

|               |                    |        |        |         |          |         |                                                    |        |      |    |                                         |
|---------------|--------------------|--------|--------|---------|----------|---------|----------------------------------------------------|--------|------|----|-----------------------------------------|
| *             | HsFLAG-ARP6_Ti_1   | 5.1326 | 0.4931 | 3630.37 | 3631.084 | 6958.9  | 1                                                  | 814.5  | 26.5 | 4  | R.GPLTSGSDEENVALPLGDNVLTHNLGIPVLVVCTK.C |
| *             | HsFLAG-p53-DNA-D   | 3.8521 | 0.28   | 1710.4  | 1710.97  | 6752.6  | 1                                                  | 1144.5 | 67.9 | 1  | K.TYGFHFTTPALVVEK.D                     |
| *             | HsFLAG-FLJ20729_   | 4.3622 | 0.4124 | 1969.53 | 1970.189 | 7851.8  | 1                                                  | 962    | 52.8 | 3  | K.NNAASEGVLASFFNSLLSK.K                 |
| *             | HsFLAG-ARP6_Ti_2   | 2.9241 | 0.2632 | 1459.31 | 1459.556 | 4131.5  | 1                                                  | 501.4  | 59.4 | 1  | K.TGSPGSPGAGGVQSTAK.K                   |
| gi 4506741 re | 3                  | 27     | 17.50% | 194     | 22127    | 10.1    | ribosomal protein S7 [Homo sapiens]                |        |      |    |                                         |
| *             | HsARP6-FLAG_Ti_1   | 3.6651 | 0.3402 | 1338.2  | 1338.72  | 4583.2  | 2                                                  | 756.2  | 72.7 | 11 | K.AIIIFVVPVQLK.S                        |
| *             | HsFLAG-TCF3_Ti_1   | 4.5887 | 0.1584 | 2368.22 | 2368.733 | 5082.2  | 1                                                  | 814.9  | 35.7 | 6  | R.TLTAVHDAILEDLVFPSEIVGK.R              |
| *             | HsFLAG-TCF3_Ti_1   | 5.5915 | 0.3068 | 2369.03 | 2368.733 | 8008.2  | 1                                                  | 1388.8 | 52.4 | 10 | R.TLTAVHDAILEDLVFPSEIVGK.R              |
| gi 71361682 r | 25                 | 84     | 17.40% | 2115    | 238257   | 5.8     | nuclear mitotic apparatus protein 1 [Homo sapiens] |        |      |    |                                         |
| *             | HsFLAG-Lin9_Ti_20  | 4.3673 | 0.3193 | 3396.47 | 3395.89  | 7129.2  | 1                                                  | 1258.1 | 31.7 | 2  | R.GAALLSWVNSLHVADPVEAVLQLQDCSIFIK.I     |
| *             | HsFLAG-FLJ20729_   | 2.9912 | 0.2523 | 1440.12 | 1440.562 | 5388.9  | 2                                                  | 415.9  | 62.5 | 2  | K.HPSSPECLVSAQK.V                       |
| *             | HsFLAG-Lin9_Ti_20  | 4.5141 | 0.377  | 2837.96 | 2838.106 | 9417.8  | 1                                                  | 1328   | 32.6 | 1  | K.LREFASHLQQLQDALNELTEEHSK.A            |
| *             | HsFLAG-p53-DNA-D   | 7.1502 | 0.3838 | 2567.15 | 2568.759 | 12002.2 | 1                                                  | 2326.8 | 39.3 | 2  | R.EFASHLQQLQDALNELTEEHSK.A              |
| *             | HsFLAG-Lin9_Ti_20  | 3.8991 | 0.2676 | 1515.01 | 1514.759 | 10363.8 | 1                                                  | 1371   | 69.2 | 1  | K.GEVLGDVQLQLETLK.Q                     |
| *             | HsARP6-FLAG_Ti_1   | 4.0714 | 0.3317 | 2262.61 | 2262.522 | 8877.1  | 1                                                  | 1192.4 | 36.2 | 1  | K.QQLSSLITDLQSSISNLSQAK.E               |
| *             | HsFlag-DPCD_Ti_20  | 3.7364 | 0.4273 | 2262.64 | 2262.522 | 7634.7  | 1                                                  | 510.7  | 40   | 1  | K.QQLSSLITDLQSSISNLSQAK.E               |
| *             | HsFlag-DPCD_Ti_20  | 5.6936 | 0.2952 | 3187.41 | 3187.572 | 11686.4 | 1                                                  | 1560   | 30.2 | 7  | R.LTAQVASLTSELTTLNATIQQQDQELAGLK.Q      |
| *             | HsFLAG-Lin9_Ti_20  | 5.5699 | 0.4418 | 2126.94 | 2127.322 | 11392.5 | 1                                                  | 2089.1 | 63.9 | 1  | K.QAQLAQTLLQQEQASQGLR.H                 |
| *             | HsARP6-FLAG_Ti_1   | 3.3941 | 0.3168 | 1257.44 | 1256.401 | 5880.4  | 1                                                  | 1072.1 | 85   | 8  | R.HQVEQLSSSLK.Q                         |
| *             | HsFLAG-p53-DNA-D   | 5.364  | 0.457  | 1871.79 | 1872.128 | 8231.9  | 1                                                  | 1955.5 | 71.9 | 9  | R.VEFATLQEALAHALTEK.E                   |
| *             | HsARP6-FLAG_Ti_1   | 3.902  | 0.2838 | 1872.05 | 1872.128 | 3953.6  | 1                                                  | 734.7  | 43.8 | 1  | R.VEFATLQEALAHALTEK.E                   |
| *             | HsYL1_Ti_103.1104. | 3.519  | 0.1933 | 1448.54 | 1448.582 | 5429.5  | 1                                                  | 951.5  | 77.3 | 2  | R.AEVSKLEQQCQK.Q                        |
| *             | HsFlag-VPS71_Ti_1  | 5.2739 | 0.4996 | 1654.32 | 1654.78  | 7438.4  | 1                                                  | 1892   | 76.7 | 11 | K.AQELGHSQSALASAQR.E                    |
| *             | HsFLAG-Lin9_Ti_20  | 4.595  | 0.3859 | 1803.48 | 1804.007 | 8417.5  | 1                                                  | 2249.6 | 73.3 | 1  | K.NSLISSEEEVSILNR.Q                     |
| *             | HsARP6-FLAG_Ti_1   | 3.9881 | 0.4178 | 1260.31 | 1261.377 | 9398.6  | 1                                                  | 1982.1 | 86.4 | 2  | R.LLQAETASNSAR.A                        |
| *             | HsMRGBP-FLAG_Ti_1  | 5.9266 | 0.3472 | 1725.74 | 1725.865 | 6371.3  | 1                                                  | 1794.5 | 82.1 | 10 | K.HLCQQLQAEQAAEK.R                      |
| *             | HsYL1_Ti_104.1398. | 3.1522 | 0.2007 | 1193.54 | 1194.376 | 4316.6  | 2                                                  | 592.9  | 70   | 2  | R.LGHQLQQAGLK.T                         |
| *             | HsFlag-NUFIP_Ti_20 | 3.068  | 0.121  | 1194.09 | 1194.376 | 7179.5  | 3                                                  | 847.8  | 70   | 5  | R.LGHQLQQAGLK.T                         |
| *             | HsFLAG-Lin9_Ti_20  | 4.4267 | 0.331  | 1566.57 | 1566.714 | 7061    | 1                                                  | 1469.8 | 76.9 | 6  | R.SLEAQVAHADQQLR.D                      |
| *             | HsFlag-DPCD_Ti_20  | 2.738  | 0.1884 | 1925.08 | 1925.062 | 4426.8  | 1                                                  | 527.8  | 55.6 | 1  | R.TQPDGTSVPGEPASPISQR.L                 |
| *             | HsYL1_Ti_105.2507. | 5.2305 | 0.4987 | 2158.85 | 2158.546 | 8998.5  | 1                                                  | 2334.6 | 69.4 | 3  | R.LPPKVESLESYFTPIPAR.S                  |
| *             | HsFlag-DPCD_Ti_20  | 4.1815 | 0.4507 | 2194.52 | 2194.36  | 9229.8  | 1                                                  | 1168.4 | 52.5 | 2  | R.SQAPLESSLDSLGDVFLDSGR.K               |
| *             | HsFLAG-Lin9_Ti_20  | 4.353  | 0.3551 | 2046.69 | 2046.155 | 4740.4  | 1                                                  | 627.3  | 55.9 | 2  | K.KLDVEEPDSANSSFYSTR.S                  |
| *             | HsFLAG-p53-DNA-D   | 3.8993 | 0.3935 | 1564.77 | 1563.707 | 7242    | 1                                                  | 1204.7 | 71.4 | 1  | R.VSLEPHQGPPTPEK.K                      |
| gi 8922789 re | 5                  | 32     | 17.40% | 357     | 41739    | 6.2     | paraspeckle protein 1 [Homo sapiens]               |        |      |    |                                         |
| *             | HsARP6-FLAG_Ti_1   | 4.4363 | 0.4019 | 1840    | 1839.052 | 3373    | 1                                                  | 603.2  | 70   | 7  | R.LFVGNLPTDITEEDFK.R                    |
| *             | HsARP6-FLAG_Ti_1   | 2.6053 | 0.26   | 1115.44 | 1116.305 | 4985.7  | 1                                                  | 563.9  | 65   | 3  | R.FATHGAALTVK.N                         |
| *             | HsFLAG-Lin9_Ti_20  | 5.1027 | 0.3989 | 2533.23 | 2533.841 | 9525.6  | 1                                                  | 1309.3 | 47.7 | 12 | K.NLSPVVSNELLEQAFSQFGPVEK.A             |
| *             | HsFLAG-FLJ20729_   | 5.0848 | 0.2917 | 2535.31 | 2533.841 | 9751.6  | 1                                                  | 1480.2 | 35.2 | 2  | K.NLSPVVSNELLEQAFSQFGPVEK.A             |
| *             | HsFlag-NUFIP_Ti_20 | 3.8033 | 0.2105 | 1290.4  | 1290.508 | 5702.6  | 1                                                  | 957.5  | 77.3 | 8  | K.GFVEFAAKPPAR.K                        |
| gi 4507521 re | 5                  | 5      | 17.30% | 623     | 67878    | 7.7     | transketolase [Homo sapiens]                       |        |      |    |                                         |
| *             | HsFLAG-p53-DNA-D   | 2.9249 | 0.216  | 2020.99 | 2021.278 | 4332.5  | 1                                                  | 375.7  | 50   | 1  | K.ILATPPQEDAPSVDIANIR.M                 |
| *             | HsH2AZ-FLAG_293_   | 4.139  | 0.4987 | 1886.48 | 1886.066 | 5439.2  | 1                                                  | 594.7  | 55.9 | 1  | R.SVPTSTVFYPSDGVATEK.A                  |

|             |                    |        |        |         |          |         |                         |                                                                                                          |      |                                             |  |
|-------------|--------------------|--------|--------|---------|----------|---------|-------------------------|----------------------------------------------------------------------------------------------------------|------|---------------------------------------------|--|
| *           | HsFlag-VPS71_Ti_1C | 4.315  | 0.387  | 2508.94 | 2509.695 | 5839.5  | 1                       | 889.7                                                                                                    | 52.4 | 1 R.TSRPENAIYYNNNEDFQVGQAK.V                |  |
| *           | HsFlag-VPS71_Ti_1C | 2.6051 | 0.1577 | 1542.85 | 1542.862 | 4808.3  | 4                       | 344.8                                                                                                    | 58.3 | 1 R.VLDPFTIKPLDRK.L                         |  |
| *           | HsFlag-VPS71_Ti_1C | 3.6418 | 0.2667 | 3756.88 | 3755.176 | 8123.3  | 1                       | 764.9                                                                                                    | 24.3 | 1 R.ILTVEDHYEYEGGIGEAVSSAVVGEPIGTVTHLAVNR.V |  |
| gi 56676330 | 7                  | 44     | 17.20% | 553     | 61207    | 9.7     | HP1-BP74 [Homo sapiens] |                                                                                                          |      |                                             |  |
| *           | HsFlag-NUFIP_Ti_1C | 5.0428 | 0.4266 | 1559.57 | 1559.892 | 6528    | 1                       | 1436.3                                                                                                   | 75   | 19 K.ALPLIVGAQLIHADK.L                      |  |
| *           | HsFLAG-p53-DNA-D   | 4.0934 | 0.3407 | 1730.01 | 1731.005 | 4687.4  | 1                       | 805.2                                                                                                    | 66.7 | 6 K.KTIPSWATLSASQLAR.A                      |  |
| *           | HsFLAG-ARP6_Ti_1   | 4.3757 | 0.4619 | 1602    | 1602.831 | 4501.9  | 1                       | 824.4                                                                                                    | 75   | 2 K.TIPSWATLSASQLAR.A                       |  |
| *           | HsFlag-VPS71_Ti_1C | 4.8071 | 0.2846 | 2393.1  | 2390.859 | 8714.4  | 1                       | 1468.5                                                                                                   | 35.2 | 1 K.PLLGGSLMEYAILSIAIAMNEPK.T               |  |
| *           | HsFlag-NUFIP_Ti_11 | 3.3467 | 0.1707 | 2258.84 | 2259.544 | 5617.6  | 4                       | 282.4                                                                                                    | 41.7 | 1 K.YVLENHPGTNSNYQMHLK.K                    |  |
| *           | HsFlag-NUFIP_Ti_11 | 3.7768 | 0.1786 | 2260.71 | 2259.544 | 4133.5  | 2                       | 538.6                                                                                                    | 36.1 | 1 K.YVLENHPGTNSNYQMHLK.K                    |  |
| *           | HsFLAG-p53-DNA-D   | 4.3587 | 0.4321 | 2508.83 | 2510.86  | 5563.4  | 1                       | 560.2                                                                                                    | 42.9 | 14 K.GFSGTFQLCFPPYPSGVLFPK.K                |  |
| gi 4505939  | re                 | 22     | 58     | 17.10%  | 1970     | 217204  | 7.4                     | PolII_Rpb1 {DNA directed RNA polymerase II polypeptide A; polymerase (RNA) II (DNA directed) polypeptide |      |                                             |  |
| *           | HsFlag-NUFIP_Ti_1C | 4.4352 | 0.37   | 1596.5  | 1596.724 | 5483.5  | 1                       | 1034.8                                                                                                   | 70   | 2 -.MHGGGPPSGDSACPLR.T                      |  |
| *           | HsFlag-NUFIP_Ti_1C | 4.0079 | 0.217  | 1488.85 | 1488.727 | 7112.6  | 1                       | 1436.1                                                                                                   | 75   | 5 K.RVQFGVLSPELKR.R                         |  |
| *           | HsFlag-NUFIP_Ti_1C | 3.5655 | 0.1773 | 1488.66 | 1488.727 | 6854.7  | 1                       | 1118.6                                                                                                   | 75   | 2 R.VQFGVLSPELKR.M                          |  |
| *           | HsFlag-NUFIP_Ti_1C | 6.2476 | 0.444  | 2527.42 | 2528.003 | 4903.9  | 1                       | 1570.5                                                                                                   | 44.3 | 5 R.MIVTPQSNRPVMGIVQDTLTAVR.K               |  |
| *           | HsFlag-NUFIP_Ti_1C | 3.1581 | 0.2137 | 2529.22 | 2528.003 | 5802.2  | 3                       | 274.5                                                                                                    | 34.1 | 1 R.MIVTPQSNRPVMGIVQDTLTAVR.K               |  |
| *           | HsFlag-NUFIP_Ti_11 | 3.293  | 0.1521 | 1119.48 | 1119.396 | 4485.9  | 1                       | 771.3                                                                                                    | 88.9 | 2 K.VPQPAILKPR.P                            |  |
| *           | HsFlag-NUFIP_Ti_11 | 3.1534 | 0.1143 | 1781.91 | 1782.105 | 3966.2  | 1                       | 472                                                                                                      | 60.7 | 1 K.QIFSLIIPGHINCIR.T                       |  |
| *           | HsFlag-NUFIP_Ti_1C | 4.665  | 0.4131 | 2445.43 | 2445.753 | 6801.8  | 1                       | 942.7                                                                                                    | 35.2 | 4 K.SLGTSAGSLVHISYLEMGHDITR.L               |  |
| *           | HsFlag-NUFIP_Ti_11 | 5.8363 | 0.4427 | 3433.11 | 3433.886 | 7908.4  | 1                       | 1423                                                                                                     | 30.8 | 3 R.LFYNSNIQTVINWLLIEGHTIGIGDSIADSK.T       |  |
| *           | HsFLAG-p53-DNA-D   | 4.7134 | 0.4161 | 1663.42 | 1663.787 | 5246.9  | 1                       | 1047.3                                                                                                   | 71.4 | 4 K.AHNNELEPTPGNTLR.Q                       |  |
| *           | HsFlag-NUFIP_Ti_1C | 4.3557 | 0.3519 | 1775.54 | 1775.958 | 6651.4  | 1                       | 1450                                                                                                     | 71.4 | 7 R.TLPHFIKDDYGPESR.G                       |  |
| *           | HsFlag-NUFIP_Ti_1C | 4.2462 | 0.3374 | 2649.38 | 2649.983 | 6732.5  | 1                       | 705.5                                                                                                    | 29.3 | 1 R.GFVENSYLAGLTPTEFFFHAMGGR.E              |  |
| *           | HsFlag-NUFIP_Ti_1C | 3.9607 | 0.299  | 2650.12 | 2649.983 | 6080.3  | 1                       | 491.9                                                                                                    | 39.1 | 3 R.GFVENSYLAGLTPTEFFFHAMGGR.E              |  |
| *           | HsFlag-NUFIP_Ti_1C | 2.0101 | 0.1919 | 1019.45 | 1020.217 | 4845.9  | 8                       | 446.5                                                                                                    | 68.8 | 1 R.LPSDLHPIK.V                             |  |
| *           | HsFlag-NUFIP_Ti_1C | 3.1165 | 0.2522 | 1020.39 | 1020.217 | 4552.6  | 1                       | 928.8                                                                                                    | 93.8 | 2 R.LPSDLHPIK.V                             |  |
| *           | HsFLAG-UTX1_Ti_2   | 4.7236 | 0.4523 | 1794.09 | 1794.999 | 7083.1  | 1                       | 2411.6                                                                                                   | 80   | 5 R.LSGEAFDWLLGEIESK.F                      |  |
| *           | HsFlag-NUFIP_Ti_11 | 5.1292 | 0.3778 | 4130.69 | 4131.67  | 7538.3  | 1                       | 1297.9                                                                                                   | 26.3 | 1 K.N                                       |  |
| *           | HsFLAG-p53-DNA-D   | 4.0103 | 0.3555 | 1490.37 | 1490.743 | 9593    | 1                       | 1618.7                                                                                                   | 73.1 | 4 K.TPSLTVFLLGQSAR.D                        |  |
| *           | HsFlag-NUFIP_Ti_1C | 5.1986 | 0.4084 | 2244.68 | 2243.314 | 8309.6  | 1                       | 1159.9                                                                                                   | 55.3 | 2 K.INAGFGDDLNCIFNDDNAEK.L                  |  |
| *           | HsFLAG-UTX1_Ti_2   | 3.0345 | 0.3536 | 2079.01 | 2078.37  | 10793.9 | 1                       | 761                                                                                                      | 47.2 | 1 R.TTSNDIVEIFTVLGIEAVR.K                   |  |
| *           | HsFlag-NUFIP_Ti_1C | 3.368  | 0.2251 | 1492.87 | 1491.678 | 9589    | 1                       | 1560.3                                                                                                   | 77.3 | 1 R.HLALLCDTMTCR.G                          |  |
| *           | HsFlag-FLJ20643_Ti | 4.494  | 0.3947 | 2258.95 | 2259.474 | 7030.3  | 1                       | 836                                                                                                      | 50   | 1 K.YSPTSPTYSPVYPTSPK.Y                     |  |
| gi 44889481 | r                  | 14     | 31     | 17.10%  | 1078     | 124951  | 9.2                     | myosin IB [Homo sapiens]                                                                                 |      |                                             |  |
| *           | HsFLAG-ARP6_Ti_1   | 2.793  | 0.3233 | 1710.23 | 1710.924 | 4783    | 1                       | 765.7                                                                                                    | 69.2 | 2 R.SLPIYSPEKVEEYR.N                        |  |
| *           | HsFLAG-ARP6_Ti_1   | 5.6172 | 0.4449 | 2172.29 | 2173.389 | 6982.7  | 1                       | 1915.6                                                                                                   | 76.5 | 2 R.NFYELSPHIFALSDEAYR.S                    |  |
| *           | HsFLAG-ARP6_Ti_1   | 3.5012 | 0.237  | 2175.92 | 2173.389 | 4543.5  | 1                       | 834.4                                                                                                    | 39.7 | 1 R.NFYELSPHIFALSDEAYR.S                    |  |
| *           | HsFLAG-Lin9_Ti_20  | 4.1894 | 0.306  | 1860.62 | 1859.089 | 6844    | 1                       | 882.5                                                                                                    | 59.4 | 2 K.EQLLQSNPVLEAFGNAK.T                     |  |
| *           | HsFLAG-BC014022_   | 4.5693 | 0.2081 | 2211.54 | 2210.494 | 9029.6  | 1                       | 2106.7                                                                                                   | 44.4 | 5 R.NFHVFYQLLSGASELLNK.L                    |  |
| *           | HsFLAG-ARP6_Ti_1   | 2.7631 | 0.0822 | 1290.8  | 1290.462 | 6512.2  | 1                       | 1177.7                                                                                                   | 80   | 1 K.LGNIEFKPESR.V                           |  |
| *           | HsVPS71-FLAG_Ti_   | 2.0694 | 0.1664 | 1102.6  | 1103.261 | 2226.3  | 3                       | 122.4                                                                                                    | 66.7 | 4 R.VNGLDESKIK.D                            |  |
| *           | HsMRGBP-FLAG_Ti    | 2.6079 | 0.1645 | 1103.32 | 1103.261 | 4972.4  | 3                       | 864.2                                                                                                    | 72.2 | 1 R.VNGLDESKIK.D                            |  |

|                |                     |        |        |         |          |         |   |        |      |                                                                        |
|----------------|---------------------|--------|--------|---------|----------|---------|---|--------|------|------------------------------------------------------------------------|
| *              | HsFLAG-ARP6_Ti_1    | 3.9177 | 0.4246 | 1594.34 | 1594.733 | 3958.9  | 1 | 655.3  | 75   | 2 R.FLNDSLPHSCFR.I                                                     |
| *              | HsFLAG-Lin9_Ti_20   | 2.5222 | 0.1512 | 1088.28 | 1089.239 | 10236.3 | 2 | 1204.1 | 77.8 | 1 K.RPPTAGSQFK.A                                                       |
| *              | HsFLAG-ARP6_Ti_1    | 4.2948 | 0.3468 | 2414.64 | 2414.674 | 4684.9  | 1 | 851.1  | 57.5 | 6 R.SGVEVLFNELEIPVEEYSFGR.S                                            |
| *              | HsFLAG-ARP6_Ti_1    | 2.9735 | 0.3234 | 1803.86 | 1804.015 | 7933.4  | 2 | 752.5  | 50   | 1 K.EAVTTIAAYWHGTQVR.R                                                 |
| *              | HsFLAG-ARP6_Ti_1    | 4.3965 | 0.352  | 2182.21 | 2183.469 | 5692.4  | 1 | 1627.1 | 71.1 | 2 K.ALYPSSVGQPFQGAYLEINK.N                                             |
| *              | HsFLAG-Lin9_Ti_20   | 4.1894 | 0.2854 | 1730    | 1731.045 | 12151.4 | 1 | 1680.9 | 67.9 | 1 R.IFLLTNNNLLLADQK.S                                                  |
| gij 4504895 re |                     | 5      | 11     | 17.10%  | 538      | 60307   |   |        |      | 5 karyopherin alpha 1 [Homo sapiens]                                   |
| *              | HsFlag-FLJ90652_2   | 3.7797 | 0.3161 | 2150.02 | 2149.501 | 4161.1  | 1 | 774.6  | 64.7 | 4 R.DYVLDNCNLPPLLQLFSK.Q                                               |
| *              | HsFLAG-Lin9_Ti_20   | 4.6445 | 0.2998 | 3507.17 | 3506.988 | 6230.4  | 1 | 807.4  | 28.1 | 3 R.AVGNIVTGDDIQTQVILNCSALQSLHLLSSPK.E                                 |
|                | HsFLAG-TIP49a_Ti_   | 3.4162 | 0.2619 | 1393.24 | 1392.617 | 5742.1  | 1 | 859.8  | 72.7 | 1 K.PLCDLLTMDSK.I                                                      |
|                | HsFLAG-Lin9_Ti_20   | 5.0013 | 0.2717 | 1553.05 | 1552.858 | 10861.1 | 1 | 2767   | 80.8 | 2 K.IVQVALNGLENILR.L                                                   |
|                | HsFlag-FLJ90652_2   | 4.8161 | 0.3707 | 1909.07 | 1907.09  | 9756.6  | 1 | 2054.1 | 75   | 1 K.IEFLQSHENQEIQK.A                                                   |
| gij 5803207 re |                     | 4      | 23     | 17.10%  | 240      | 27872   |   |        |      | 8.8 U2 small nuclear RNA auxiliary factor 1 isoform a [Homo sapiens]   |
| *              | HsFLAG-p53-DNA-D    | 3.1585 | 0.2502 | 1374.44 | 1374.41  | 6433.8  | 1 | 721.8  | 70.8 | 2 R.NPQNSSQSADGLR.C                                                    |
|                | HsFlag-NUFIP_Ti_1   | 5.3315 | 0.4411 | 2114.92 | 2115.356 | 7142.3  | 1 | 1334.7 | 64.7 | 14 R.WFNGQPIHAELSPVTDFR.E                                              |
|                | HsFlag-VPS71_Ti_1   | 4.8516 | 0.3722 | 2116.79 | 2115.356 | 5141.9  | 1 | 639.7  | 39.7 | 5 R.WFNGQPIHAELSPVTDFR.E                                               |
|                | HsFlag-NUFIP_Ti_11  | 3.1112 | 0.2405 | 1211.42 | 1211.39  | 7349.4  | 3 | 871.1  | 72.2 | 2 R.GGFCNFMHLK.P                                                       |
| gij 31563378 r |                     | 2      | 3      | 17.10%  | 245      | 26599   |   |        |      | 4.7 integrin beta 4 binding protein isoform a [Homo sapiens]           |
| gij 4504771 re |                     | 2      | 3      | 17.10%  | 245      | 26599   |   |        |      | 4.7 integrin beta 4 binding protein isoform a [Homo sapiens]           |
|                | HsFlag-NUFIP_Ti_11  | 4.171  | 0.4071 | 2086.21 | 2086.315 | 7569.1  | 1 | 1169.2 | 41.2 | 1 R.HGLLVNNTTDQELQHIR.N                                                |
|                | HsFLAG-Lin9_Ti_20   | 3.7703 | 0.3265 | 2584.75 | 2585.871 | 6813    | 1 | 535.1  | 39.1 | 2 K.TSIEDQDELSLLQVPLVAGTVNR.G                                          |
| gij 4506635 re |                     | 2      | 7      | 17.00%  | 135      | 15860   |   |        |      | 11.3 ribosomal protein L32 [Homo sapiens]                              |
| gij 89026739 r |                     | 2      | 7      | 17.00%  | 135      | 15751   |   |        |      | 10.9 PREDICTED: similar to 60S ribosomal protein L32 [Homo sapiens]    |
| gij 89025918 r |                     | 2      | 7      | 17.00%  | 135      | 15751   |   |        |      | 10.9 PREDICTED: similar to 60S ribosomal protein L32 [Homo sapiens]    |
| gij 89024761 r |                     | 2      | 7      | 17.00%  | 135      | 15751   |   |        |      | 10.9 PREDICTED: similar to 60S ribosomal protein L32 [Homo sapiens]    |
| gij 55743130 r |                     | 2      | 7      | 17.00%  | 135      | 15860   |   |        |      | 11.3 ribosomal protein L32 [Homo sapiens]                              |
| gij 55743128 r |                     | 2      | 7      | 17.00%  | 135      | 15860   |   |        |      | 11.3 ribosomal protein L32 [Homo sapiens]                              |
|                | HsFLAG-ARP6_Ti_1    | 3.0516 | 0.2325 | 1249.29 | 1249.474 | 7572.3  | 1 | 910.4  | 72.2 | 2 K.ELEVLLMCNK.S                                                       |
|                | HsFLAG-ARP6_Ti_1    | 4.8985 | 0.2369 | 1466.43 | 1466.557 | 7715.1  | 1 | 2179.8 | 87.5 | 5 K.SYCAEIAHNVSSK.N                                                    |
| gij 14110407 r |                     | 6      | 10     | 16.90%  | 420      | 46437   |   |        |      | 9.6 heterogeneous nuclear ribonucleoprotein D-like [Homo sapiens]      |
| gij 4885423 re |                     | 6      | 10     | 16.90%  | 420      | 46437   |   |        |      | 9.6 heterogeneous nuclear ribonucleoprotein D-like [Homo sapiens]      |
|                | HsFLAG-p53-DNA-D    | 3.6223 | 0.3153 | 1470.54 | 1470.727 | 6240.3  | 1 | 1070.9 | 75   | 3 K.MFIGGLSWDTSKK.D                                                    |
|                | HsFLAG-p53-DNA-D    | 2.9122 | 0.228  | 914.45  | 915.123  | 2938.3  | 3 | 645.5  | 85.7 | 3 R.GFGFVLFK.D                                                         |
|                | HsFLAG-p53-DNA-D    | 2.0301 | 0.1206 | 915.7   | 915.123  | 8175.2  | 7 | 803    | 78.6 | 1 R.GFGFVLFK.D                                                         |
|                | HsFLAG-FLJ20729_    | 2.8998 | 0.1693 | 1706.56 | 1706.89  | 5612.5  | 8 | 612.2  | 56.7 | 1 K.VFVGGLSPDTSEEQIK.E                                                 |
|                | HsFLAG-p53-DNA-D    | 4.1704 | 0.3201 | 2202.93 | 2204.456 | 11103   | 1 | 1002.2 | 50   | 1 K.EYFGAFGEIENIPLMDTK.T                                               |
|                | HsFLAG-Lin9_Ti_20   | 3.7759 | 0.2304 | 1862.74 | 1863.043 | 6623.9  | 1 | 807.5  | 60.7 | 1 R.RGFCFITYTDEEVPK.K                                                  |
| gij 6912618 re |                     | 4      | 9      | 16.90%  | 361      | 40877   |   |        |      | 6.6 glutaminyl-peptide cyclotransferase precursor [Homo sapiens]       |
| *              | HsFlag-DPCD_Ti_20   | 4.2244 | 0.272  | 1492.78 | 1493.7   | 6254.6  | 1 | 868.4  | 65.4 | 5 R.SFSNIISTLNPTAK.R                                                   |
| *              | HsFLAG-p53-DNA-D    | 2.9875 | 0.251  | 1746.43 | 1744.044 | 10475.6 | 1 | 1298.5 | 64.3 | 1 R.LQAIEHELHELGLLK.D                                                  |
| *              | Hs293Flag-les2_Ti_1 | 2.8927 | 0.3226 | 2433.59 | 2433.685 | 10521   | 1 | 824.4  | 47.4 | 1 R.YFQNYSYGGVIQDDHIPFLR.R                                             |
| *              | HsFLAG-RPB5MP_2     | 4.6145 | 0.3193 | 1488.6  | 1487.825 | 10272.9 | 1 | 1745   | 77.3 | 2 K.ILQVFVLEYLHL.-                                                     |
| gij 14110428 r |                     | 4      | 23     | 16.80%  | 303      | 33299   |   |        |      | 5.2 heterogeneous nuclear ribonucleoprotein C isoform a [Homo sapiens] |



|                      |        |        |         |          |         |                                                                        |        |      |    |                                         |
|----------------------|--------|--------|---------|----------|---------|------------------------------------------------------------------------|--------|------|----|-----------------------------------------|
| gi 4758544 re        | 4      | 23     | 17.60%  | 290      | 31966   | 5.2 heterogeneous nuclear ribonucleoprotein C isoform b [Homo sapiens] |        |      |    |                                         |
| HsFLAG-p53-DNA-D     | 3.8904 | 0.2855 | 1318.32 | 1317.615 | 5847.6  | 2                                                                      | 1082.2 | 77.3 | 10 | R.VFIGNLNTLVVK.K                        |
| HsFLAG-p53-DNA-D     | 4.4725 | 0.3306 | 1330.48 | 1330.486 | 7228.3  | 1                                                                      | 1555   | 85   | 7  | K.GFAFVQYVNER.N                         |
| HsFLAG-ARP6_Ti_1     | 4.1489 | 0.1617 | 1684.74 | 1684.004 | 6637.3  | 1                                                                      | 1515.6 | 73.3 | 4  | R.MIAGQVLDINLAAEPK.V                    |
| HsFLAG-ARP6_Ti_1     | 3.2624 | 0.2046 | 1415.91 | 1416.615 | 4012.8  | 1                                                                      | 313.1  | 63.6 | 2  | K.QKVDSLLENLEK.M                        |
| gi 4506411 re        | 5      | 8      | 16.70%  | 587      | 63542   | 4.7 Ran GTPase activating protein 1 [Homo sapiens]                     |        |      |    |                                         |
| * HsFLAG-Lin9_Ti_20  | 6.4994 | 0.458  | 4753.63 | 4751.431 | 7699.6  | 1                                                                      | 1085.9 | 23.3 | 2  | EALLK.S                                 |
| * HsFlag-VPS71_Ti_1  | 3.3712 | 0.2485 | 1255.53 | 1255.426 | 6882.6  | 2                                                                      | 963.5  | 75   | 2  | K.ILAAALTECHR.K                         |
| * HsFLAG-Lin9_Ti_20  | 3.7303 | 0.2224 | 1383.48 | 1383.6   | 11075.6 | 1                                                                      | 2147.2 | 81.8 | 1  | K.ILAAALTECHRK.S                        |
| * HsYL1_Ti_101.1718  | 2.5941 | 0.3101 | 1720.28 | 1719.843 | 6328.7  | 2                                                                      | 701    | 56.7 | 1  | K.SSVLIAQQTSDTSDPEK.V                   |
| * HsSrcap_Ti_206.311 | 4.4151 | 0.4039 | 2577.56 | 2577.993 | 4997.2  | 1                                                                      | 534.8  | 43.5 | 2  | K.ALAPLLAFVTKPNSALESCSFAR.H             |
| gi 16950609 r        | 4      | 5      | 16.70%  | 414      | 47669   | 6 mitochondrial ribosomal protein S27 [Homo sapiens]                   |        |      |    |                                         |
| * HsFlag-NUFIP_Ti_11 | 2.526  | 0.2382 | 1201.57 | 1201.452 | 3641.5  | 1                                                                      | 476.3  | 75   | 1  | R.KLPVSSLTISR.L                         |
| * HsFlag-NUFIP_Ti_1  | 2.7571 | 0.1583 | 1230.87 | 1230.493 | 9136.7  | 1                                                                      | 1251.5 | 72.7 | 1  | R.NFGASLLLPGLK.Q                        |
| * HsFlag-NUFIP_Ti_11 | 4.1788 | 0.4304 | 2073.31 | 2074.451 | 7332.4  | 1                                                                      | 1093.6 | 59.4 | 1  | R.AVYHNMPLIWKPGYLDR.A                   |
| * HsFlag-NUFIP_Ti_1  | 4.6418 | 0.4175 | 3516.23 | 3516.855 | 7412.8  | 1                                                                      | 864.5  | 26.8 | 2  | K.LSTCEAEDIATYEQNLQQWHLDLVQLIQR.E       |
| gi 19923935 r        | 2      | 2      | 16.70%  | 293      | 33238   | 8.1 hypothetical protein LOC112869 [Homo sapiens]                      |        |      |    |                                         |
| * HsFLAG-TCF3_Ti_1   | 4.3015 | 0.1974 | 1522.09 | 1521.841 | 6853.9  | 1                                                                      | 1233.3 | 75   | 1  | R.IAELLTELHQLIK.Q                       |
| * HsFLAG-TCF3_Ti_1   | 4.2913 | 0.2764 | 4033.54 | 4033.403 | 9177    | 1                                                                      | 655.7  | 21.4 | 1  | R.ALIHAPPQRQDDYSVLFEDTSYADGYSPPLNVAQR.Y |
| gi 5803036 re        | 3      | 12     | 16.70%  | 305      | 30841   | 9.3 heterogeneous nuclear ribonucleoprotein A0 [Homo sapiens]          |        |      |    |                                         |
| * HsFLAG-Lin9_Ti_20  | 5.3732 | 0.392  | 1691.42 | 1691.925 | 7672.2  | 1                                                                      | 2342.7 | 83.3 | 4  | K.LFIGGLNVQTSSEGLR.G                    |
| * HsFLAG-p53-DNA-D   | 5.5703 | 0.4512 | 2178.35 | 2179.348 | 9580.1  | 1                                                                      | 1372.4 | 55.3 | 3  | K.GDVAEGDLIEHFSQFGTVEK.A                |
| * HsFLAG-p53-DNA-D   | 4.4573 | 0.3648 | 1716.45 | 1716.85  | 7604.8  | 1                                                                      | 2086.5 | 82.1 | 5  | R.GFGFVYFQNHDAADK.A                     |
| gi 16306492 r        | 2      | 10     | 16.70%  | 240      | 27503   | 7.1 cell division cycle 2 protein isoform 2 [Homo sapiens]             |        |      |    |                                         |
| gi 4502709 re        | 2      | 10     | 13.50%  | 297      | 34095   | 8.4 cell division cycle 2 protein isoform 1 [Homo sapiens]             |        |      |    |                                         |
| HsSrcap_Ti_203.551   | 3.9631 | 0.3312 | 2213.18 | 2213.535 | 6186.4  | 1                                                                      | 674.6  | 44.7 | 8  | R.YSTPVDIWSIGTIFAELATK.K                |
| HsScrap_Ti_102.288   | 2.8432 | 0.3312 | 2289.3  | 2290.491 | 4294.8  | 1                                                                      | 276.9  | 39.5 | 2  | R.ALGTPNNEVWPEVESLQDYK.N                |
| gi 4504183 re        | 2      | 4      | 16.70%  | 210      | 23356   | 5.6 glutathione transferase [Homo sapiens]                             |        |      |    |                                         |
| * HsFLAG-ARP8_Ti_1   | 2.5811 | 0.1856 | 1884.57 | 1885.084 | 7681.7  | 1                                                                      | 924.8  | 56.7 | 1  | K.FQDGLTLTYSNTILR.H                     |
| * HsFLAG-ARP6_Ti_1   | 3.6829 | 0.2612 | 2117.47 | 2118.28  | 7107.6  | 1                                                                      | 972.9  | 55.6 | 3  | K.DQQAALVDMVNDGVEDLR.C                  |
| gi 4506711 re        | 2      | 8      | 16.70%  | 84       | 9461    | 9.5 ribosomal protein S27 [Homo sapiens]                               |        |      |    |                                         |
| gi 89035892 r        | 2      | 8      | 16.70%  | 84       | 9461    | 9.5 PREDICTED: similar to ribosomal protein S27 [Homo sapiens]         |        |      |    |                                         |
| gi 89035229 r        | 2      | 8      | 16.70%  | 84       | 9461    | 9.5 PREDICTED: similar to ribosomal protein S27 [Homo sapiens]         |        |      |    |                                         |
| gi 88952642 r        | 2      | 8      | 15.40%  | 91       | 10338   | 9.2 PREDICTED: similar to ribosomal protein S27 [Homo sapiens]         |        |      |    |                                         |
| gi 88948822 r        | 2      | 8      | 16.70%  | 84       | 9461    | 9.5 PREDICTED: similar to ribosomal protein S27 [Homo sapiens]         |        |      |    |                                         |
| gi 88943618 r        | 2      | 8      | 15.40%  | 91       | 10338   | 9.2 PREDICTED: similar to ribosomal protein S27 [Homo sapiens]         |        |      |    |                                         |
| gi 88942612 r        | 2      | 8      | 16.70%  | 84       | 9461    | 9.5 PREDICTED: similar to ribosomal protein S27 [Homo sapiens]         |        |      |    |                                         |
| gi 7705706 re        | 2      | 8      | 16.70%  | 84       | 9477    | 9.5 ribosomal protein S27-like [Homo sapiens]                          |        |      |    |                                         |
| HsFLAG-ARP6_Ti_1     | 4.4005 | 0.4347 | 1685.38 | 1684.951 | 5820.2  | 1                                                                      | 784.3  | 65.4 | 6  | K.RLVQSPNSYFMDVK.C                      |
| HsFLAG-ARP6_Ti_1     | 4.0078 | 0.2386 | 1528.3  | 1528.763 | 6360.4  | 1                                                                      | 1372.7 | 79.2 | 2  | R.LVQSPNSYFMDVK.C                       |
| gi 4506891 re        | 2      | 7      | 16.60%  | 277      | 32134   | 4.2 SET translocation (myeloid leukemia-associated) [Homo sapiens]     |        |      |    |                                         |
| * HsFLAG-p53-DNA-D   | 4.2229 | 0.1428 | 3729.93 | 3728.155 | 7078.9  | 1                                                                      | 527    | 23.4 | 1  | K.IPNFVWTFVNHQPQVSALLGEEDEEALHYLTR.V    |
| HsFlag-VPS71_Ti_1    | 4.6723 | 0.2036 | 1842.17 | 1841.971 | 7638.5  | 1                                                                      | 1833   | 76.9 | 6  | R.IDFYFDENPYFENK.V                      |

|               |                     |        |        |         |          |                                                                            |   |        |      |    |                                            |
|---------------|---------------------|--------|--------|---------|----------|----------------------------------------------------------------------------|---|--------|------|----|--------------------------------------------|
| gi 15431295 r | 5                   | 27     | 16.60% | 211     | 24261    | 11.7 ribosomal protein L13 [Homo sapiens]                                  |   |        |      |    |                                            |
| gi 15431297 r | 5                   | 27     | 16.60% | 211     | 24261    | 11.7 ribosomal protein L13 [Homo sapiens]                                  |   |        |      |    |                                            |
|               | HsFLAG-ARP6_Ti_1    | 3.7995 | 0.3286 | 1346.02 | 1346.534 | 6524.8                                                                     | 1 | 987.2  | 80   | 2  | R.RVATWFNQPAR.K                            |
|               | HsFlag-les6_293_Ti_ | 3.0108 | 0.2332 | 1190.59 | 1190.347 | 4958.9                                                                     | 5 | 664.6  | 77.8 | 2  | R.VATWFNQPAR.K                             |
|               | HsFLAG-TCF3_Ti_10   | 4.2455 | 0.3621 | 1232.9  | 1233.324 | 7060.5                                                                     | 1 | 1488.9 | 85   | 6  | K.STESLQANVQR.L                            |
|               | HsFLAG-TCF3_Ti_10   | 2.4416 | 0.2962 | 1382.64 | 1383.692 | 5796.7                                                                     | 3 | 239    | 54.2 | 2  | K.LATQLTGPVMPVR.N                          |
|               | HsFLAG-ARP6_Ti_10   | 3.9852 | 0.3167 | 1383.38 | 1383.692 | 7011.3                                                                     | 2 | 1304.2 | 75   | 15 | K.LATQLTGPVMPVR.N                          |
| gi 45446743 r | 9                   | 20     | 16.50% | 938     | 102975   | 7 DEAD box polypeptide 42 protein [Homo sapiens]                           |   |        |      |    |                                            |
| gi 45446747 r | 9                   | 20     | 16.50% | 938     | 102975   | 7 DEAD box polypeptide 42 protein [Homo sapiens]                           |   |        |      |    |                                            |
|               | HsFLAG-Lin9_Ti_20   | 5.1331 | 0.5017 | 1982.43 | 1982.117 | 8348                                                                       | 1 | 1563.7 | 63.2 | 2  | K.LPQQSHSAFGATSSSSGFGK.S                   |
|               | HsFlag-VPS71_Ti_10  | 3.2239 | 0.2496 | 2464.15 | 2464.821 | 6129.7                                                                     | 1 | 441    | 40   | 1  | K.KIIDPLPIDHSEIDYPPFEK.N                   |
|               | HsFLAG-FLJ20729_    | 4.2082 | 0.3397 | 2464.57 | 2464.821 | 8695.6                                                                     | 1 | 1316.2 | 36.2 | 2  | K.KIIDPLPIDHSEIDYPPFEK.N                   |
|               | HsFLAG-p53-DNA-D    | 4.4489 | 0.2166 | 2588.29 | 2588.836 | 7590.7                                                                     | 2 | 1171.3 | 37.5 | 1  | K.NFYNEHEEITNLTPQQLIDL.R                   |
|               | HsFlag-VPS71_Ti_10  | 4.9045 | 0.4981 | 2416.93 | 2417.69  | 5121.6                                                                     | 1 | 955.6  | 57.1 | 3  | R.KSEYQPTPIQCQGVVALSGR.D                   |
|               | HsFlag-NUFIP_Ti_20  | 4.2127 | 0.3211 | 2417.67 | 2417.69  | 6048.1                                                                     | 1 | 825.1  | 36.9 | 1  | R.KSEYQPTPIQCQGVVALSGR.D                   |
|               | HsFlag-DPCD_Ti_20   | 3.5569 | 0.3402 | 1823.99 | 1824.05  | 4040.6                                                                     | 1 | 516.5  | 56.2 | 5  | K.ELEPGDGPVAVIVCPTR.E                      |
|               | HsARP6-FLAG_Ti_10   | 4.2007 | 0.4392 | 1340.59 | 1340.563 | 6195.4                                                                     | 1 | 1454.2 | 83.3 | 2  | K.DIPVLVATDVAAR.G                          |
|               | HsFLAG-Lin9_Ti_20   | 4.4095 | 0.4394 | 3813.51 | 3814.975 | 5750                                                                       | 1 | 534.5  | 21.9 | 3  | AAK.G                                      |
| gi 8400738 re | 3                   | 5      | 16.50% | 393     | 43712    | 6.9 tumor protein p53 [Homo sapiens]                                       |   |        |      |    |                                            |
| *             | HsFLAG-Lin9_Ti_20   | 3.1495 | 0.3453 | 2750.63 | 2752.142 | 6382.4                                                                     | 2 | 393.1  | 33.9 | 2  | R.VAPAAPPTPAAPAPAPSWPLSSSVPSQK.T           |
| *             | HsFLAG-Lin9_Ti_20   | 3.7304 | 0.4139 | 1910.73 | 1912.119 | 6091.6                                                                     | 1 | 848.3  | 59.4 | 2  | K.TCPVQLWVDSTPPPGTR.V                      |
| *             | HsFLAG-p53-DNA-D    | 3.3678 | 0.3611 | 2069.54 | 2069.409 | 7335.4                                                                     | 1 | 856.2  | 55.6 | 1  | R.RPILTIITLEDSSGNLLGR.N                    |
| gi 4885371 re | 4                   | 19     | 16.50% | 194     | 20863    | 10.8 H1 histone family, member 0 [Homo sapiens]                            |   |        |      |    |                                            |
| *             | HsFLAG-ARP6_Ti_10   | 4.7507 | 0.296  | 1440.6  | 1439.667 | 5972.4                                                                     | 1 | 1757   | 87.5 | 11 | K.YSDMIVAAIQAEK.N                          |
| *             | HsFLAG-p53-DNA-D    | 2.8416 | 0.1223 | 1060.45 | 1061.137 | 7450.5                                                                     | 1 | 694.2  | 72.2 | 1  | K.VGENADSQIK.L                             |
| *             | HsFLAG-p53-DNA-D    | 3.2552 | 0.2584 | 1061.28 | 1061.137 | 8105.2                                                                     | 1 | 1559   | 88.9 | 2  | K.VGENADSQIK.L                             |
| *             | HsFlag-NUFIP_Ti_10  | 2.9542 | 0.1795 | 987.31  | 987.231  | 4392.9                                                                     | 7 | 1026.3 | 100  | 5  | K.RLVTTGVLK.Q                              |
| gi 10863997 r | 3                   | 6      | 16.40% | 531     | 57491    | 8.7 polypyrimidine tract binding protein 2 [Homo sapiens]                  |   |        |      |    |                                            |
| *             | HsFLAG-Lin9_Ti_20   | 4.2675 | 0.441  | 2101.76 | 2099.475 | 10544.5                                                                    | 1 | 1854.8 | 60.5 | 2  | R.KLPGEVTETEVIALGLPFGK.V                   |
| *             | HsFLAG-Lin9_Ti_20   | 5.5024 | 0.393  | 3668.11 | 3666.123 | 10107                                                                      | 2 | 878.2  | 22.2 | 2  | R.AQAVLQAVTAVQTANTPLSGTTVSES AVTPAQSPVLR.I |
| *             | HsFLAG-FLJ20729_    | 4.2807 | 0.3662 | 2689.01 | 2688.1   | 9043                                                                       | 1 | 1409.4 | 31   | 2  | K.ETSL LAVPGALSPLAIPNAAAAAAAAAAGR.V        |
| gi 21361350 r | 3                   | 4      | 16.40% | 354     | 39038    | 4.8 serologically defined colon cancer antigen 3 [Homo sapiens]            |   |        |      |    |                                            |
| *             | HsFLAG-TCF3_Ti_10   | 4.4819 | 0.5264 | 2311.75 | 2312.458 | 7099.4                                                                     | 1 | 1118.3 | 52.2 | 1  | R.VSPASPAGSPSADFAVHGESLGDR.H               |
| *             | HsFLAG-TCF3_Ti_10   | 4.0485 | 0.3191 | 2003.27 | 2003.309 | 6381.7                                                                     | 1 | 1092.7 | 42.2 | 2  | K.LKQEISLLQAQVSNFQR.E                      |
| *             | HsFLAG-TCF3_Ti_10   | 4.7245 | 0.3901 | 1799.42 | 1799.118 | 8082.4                                                                     | 1 | 1377.1 | 65.6 | 1  | K.QLVSGAETLNLVAEILK.S                      |
| gi 5453599 re | 3                   | 9      | 16.40% | 286     | 32949    | 5.8 capping protein (actin filament) muscle Z-line, alpha 2 [Homo sapiens] |   |        |      |    |                                            |
|               | HsFlag-FLJ90652_2   | 3.7224 | 0.1765 | 1199.09 | 1198.408 | 6513.5                                                                     | 1 | 1344.7 | 94.4 | 5  | R.LLLNNDNLLR.E                             |
| *             | HsFlag-FLJ90652_2   | 6.009  | 0.4242 | 2315.76 | 2316.585 | 8428.9                                                                     | 1 | 2162.4 | 47.4 | 2  | K.KIDGQQTIACIESHQFQAK.N                    |
|               | HsFlag-FLJ90652_2   | 4.9973 | 0.4721 | 2029.62 | 2030.247 | 9558.4                                                                     | 1 | 2401.2 | 75   | 2  | K.IQVHYEDGNVQLVSHK.D                       |
| gi 51100974 r | 11                  | 22     | 16.30% | 1006    | 116202   | 9.4 myosin ID [Homo sapiens]                                               |   |        |      |    |                                            |
| *             | HsFLAG-ARP6_Ti_10   | 2.6592 | 0.1029 | 2104.36 | 2105.401 | 7802.3                                                                     | 1 | 550.6  | 47.1 | 1  | R.ELYERPPHLFAIADAAYK.A                     |
| *             | HsFLAG-ARP6_Ti_10   | 3.4498 | 0.269  | 2130.36 | 2129.398 | 11402.8                                                                    | 1 | 843.3  | 44.1 | 1  | R.SFHSFYQLLQGGSEQMLR.S                     |
| *             | HsFLAG-Lin9_Ti_20   | 2.9098 | 0.3113 | 1680.57 | 1680.901 | 8104.7                                                                     | 1 | 984.3  | 60.7 | 1  | K.SLSSYNYIHVGAQLK.S                        |

|                |                    |        |        |         |          |         |   |        |      |   |                                                                      |
|----------------|--------------------|--------|--------|---------|----------|---------|---|--------|------|---|----------------------------------------------------------------------|
| *              | HsFLAG-ARP6_Ti_1   | 3.7705 | 0.3839 | 1651.44 | 1651.943 | 3665.8  | 1 | 719.8  | 76.9 | 4 | K.VIGFKPEEIQTVYK.I                                                   |
| *              | HsFLAG-ARP6_Ti_1   | 2.5693 | 0.1153 | 1422.52 | 1422.686 | 6700.5  | 5 | 561.8  | 59.1 | 1 | K.RLMYNSSNPVLK.N                                                     |
| *              | HsFLAG-ARP6_Ti_1   | 2.5835 | 0.1126 | 1118.82 | 1118.365 | 5241.9  | 6 | 548.8  | 72.2 | 1 | K.RPLTAATLFK.N                                                       |
| *              | HsFLAG-Lin9_Ti_20% | 4.025  | 0.3734 | 1570.53 | 1570.789 | 7027.7  | 1 | 1397.5 | 79.2 | 3 | R.HQVEYLGLLENVR.V                                                    |
| *              | HsFLAG-Lin9_Ti_20% | 4.3807 | 0.366  | 1524.86 | 1524.72  | 8695.9  | 1 | 1899   | 86.4 | 3 | R.RFEEALQTIFNR.W                                                     |
| *              | HsFLAG-ARP6_Ti_1   | 6.3534 | 0.4724 | 3021.65 | 3022.341 | 8096.9  | 1 | 2140.2 | 38   | 4 | R.AWEGNYLASKPDTPTSGTFVPVANELK.R                                      |
| *              | HsFLAG-ARP6_Ti_1   | 3.3469 | 0.1608 | 1426.51 | 1426.642 | 6067.1  | 3 | 764.3  | 70   | 1 | K.YMNVLFSCHVR.K                                                      |
| *              | HsFLAG-Lin9_Ti_20% | 4.1938 | 0.3697 | 1425.34 | 1425.714 | 5989    | 1 | 1089.8 | 75   | 2 | R.IGELVGVLVNHF.K.S                                                   |
| gij 21359884 r |                    | 8      | 12     | 16.30%  | 884      | 99992   |   |        |      |   | 9.2 calcium homeostasis endoplasmic reticulum protein [Homo sapiens] |
| *              | HsFlag-NUFIP_Ti_11 | 4.0654 | 0.4192 | 1504.71 | 1505.701 | 7284.3  | 1 | 1536   | 79.2 | 3 | K.SPPHCELMAGHLR.N                                                    |
| *              | HsFLAG-Lin9_Ti_20% | 3.56   | 0.39   | 1970.03 | 1970.236 | 4817.1  | 1 | 752.6  | 65.6 | 1 | K.VVPIYCTSFSAVEEDK.Q                                                 |
| *              | HsFlag-NUFIP_Ti_1C | 5.6584 | 0.4152 | 4084.5  | 4085.469 | 8277.6  | 1 | 1194   | 26.5 | 1 | K.TQHEEFVTSLAQQQQQQQQQQLQMPQMEAEVK.A                                 |
| *              | HsFlag-NUFIP_Ti_1C | 4.3608 | 0.3103 | 3888.95 | 3891.042 | 7600.8  | 1 | 902.4  | 26.5 | 1 | R.DAPWNNQPDAAWNSQFEGPWNSQHEQPPWGGGQR.E                               |
| *              | HsFlag-NUFIP_Ti_11 | 3.7234 | 0.25   | 2027.26 | 2027.29  | 4418.9  | 1 | 687.6  | 41.2 | 2 | R.LLAAVEAFYSPSHDRPR.N                                                |
| *              | HsFLAG-UTX1_Ti_20% | 2.6455 | 0.2155 | 2028.03 | 2027.29  | 8263.8  | 2 | 469.3  | 44.1 | 1 | R.LLAAVEAFYSPSHDRPR.N                                                |
| *              | HsFLAG-p53-DNA-D   | 5.0325 | 0.4758 | 1876.21 | 1876.979 | 8280.4  | 1 | 1542.8 | 71.4 | 2 | R.NSEGWEQNGLYEFFR.A                                                  |
| *              | HsFLAG-ARP5_Ti_1   | 2.8885 | 0.1831 | 1482.61 | 1483.726 | 9925.4  | 1 | 1176.7 | 66.7 | 1 | R.LGEENKGHQMLVK.M                                                    |
| gij 23110925 r |                    | 1      | 2      | 16.30%  | 239      | 25358   |   |        |      |   | 4.9 proteasome beta 6 subunit [Homo sapiens]                         |
| *              | HsFlag-VPS71_Ti_1C | 4.8525 | 0.3301 | 4058.11 | 4058.494 | 8066.2  | 1 | 852.3  | 21.7 | 2 | R.SGSAADTQAVADAVTYQLGFHSIELNEPPLVHTAASLFK.E                          |
| gij 7705320 re |                    | 2      | 6      | 16.30%  | 203      | 22620   |   |        |      |   | 8 hepatoma-derived growth factor, related protein 3 [Homo sapiens]   |
| *              | HsARP6-FLAG_Ti_1   | 4.2542 | 0.3495 | 1971.51 | 1973.281 | 5668.1  | 1 | 836.9  | 59.4 | 5 | K.YPIFFFGTHETAFLGPK.D                                                |
| *              | HsFLAG-Lin9_Ti_20% | 2.5886 | 0.2553 | 1803.29 | 1803.969 | 8622.8  | 1 | 422.4  | 46.7 | 1 | K.GFNEGLWEIENNPVK.F                                                  |
| gij 4507131 re |                    | 1      | 3      | 16.30%  | 86       | 9725    |   |        |      |   | 4.7 small nuclear ribonucleoprotein polypeptide F [Homo sapiens]     |
| *              | HsFLAG-p53-DNA-D   | 4.0158 | 0.2227 | 1501.49 | 1501.871 | 10130.3 | 1 | 2040.9 | 76.9 | 3 | K.PFLNGLTGKPVVMVK.L                                                  |
| gij 4885403 re |                    | 19     | 45     | 16.20%  | 1938     | 198471  |   |        |      |   | 7.3 host cell factor C1 (VP16-accessory protein) [Homo sapiens]      |
| *              | HsFLAG-FLJ20436_   | 3.2219 | 0.2499 | 1459.18 | 1459.555 | 5286.1  | 1 | 684.7  | 68.2 | 2 | K.YSNDLYELQASR.W                                                     |
| *              | HsFLAG-FLJ20436_   | 4.1291 | 0.4177 | 1686.31 | 1686.782 | 6458.8  | 1 | 1245.5 | 67.9 | 1 | K.CYLFGGGLANDEDPK.N                                                  |
| *              | HsFLAG-FLJ20729_   | 3.0285 | 0.2884 | 1906.01 | 1905.158 | 9699.7  | 1 | 1074.4 | 56.7 | 1 | R.LGDLWTLDIDTLTNK.P                                                  |
| *              | HsFlag-VPS71_Ti_1C | 5.3692 | 0.4394 | 2980.47 | 2980.434 | 4790.1  | 1 | 485    | 26.9 | 1 | R.LGDLWTLDIDTLTNKPSLSGVAPLPR.S                                       |
| *              | HsFLAG-FLJ20436_   | 2.7854 | 0.1788 | 1094.6  | 1094.299 | 5288.5  | 8 | 681.6  | 65   | 1 | K.PSLSGVAPLPR.S                                                      |
| *              | HsFLAG-p53-DNA-D   | 2.8377 | 0.2456 | 1128.48 | 1129.258 | 5494.9  | 1 | 714.5  | 75   | 6 | R.SLHSATTIGNK.M                                                      |
| *              | HsFlag-VPS71_Ti_1C | 4.9849 | 0.5343 | 1857.79 | 1857.236 | 5228.2  | 1 | 1316.7 | 76.7 | 6 | K.MYVFGGWVPLVMDDVK.V                                                 |
| *              | HsFLAG-FLJ20436_   | 2.3811 | 0.2304 | 1169.44 | 1170.28  | 4094.4  | 1 | 323    | 60   | 3 | R.AGHCAVAINTR.L                                                      |
| *              | HsFLAG-FLJ20436_   | 3.103  | 0.4336 | 2679.86 | 2680.974 | 6646.3  | 1 | 623.9  | 39.6 | 1 | R.ANTNSLEVSWGAVATADSYLLQLQK.Y                                        |
| *              | HsFLAG-Lin9_Ti_20% | 3.4936 | 0.3878 | 2675.34 | 2675.998 | 7755    | 1 | 586.9  | 36.5 | 2 | K.YDIPATAATATSPTPNPVPSPANPPK.S                                       |
| *              | HsFlag-VPS71_Ti_1C | 3.4428 | 0.3015 | 2270.48 | 2270.609 | 5799.1  | 1 | 386.8  | 36.4 | 1 | K.VTGPQATTGTPLVTRPASQAGK.A                                           |
| *              | HsFLAG-p53-DNA-D   | 3.6003 | 0.4127 | 1597.78 | 1597.852 | 3228.2  | 1 | 422    | 59.4 | 2 | K.SPISVPGGSALISNLGK.V                                                |
| *              | HsFLAG-FLJ20436_   | 4.4782 | 0.3394 | 1638.32 | 1636.892 | 8249.3  | 1 | 1375   | 66.7 | 7 | K.IATGHGQQGVTVVVK.G                                                  |
| *              | HsFLAG-FLJ20436_   | 3.3272 | 0.2404 | 1346.74 | 1345.582 | 6726.5  | 2 | 984.7  | 66.7 | 2 | R.SPAFVQLAPLSSK.V                                                    |
| *              | HsFLAG-Lin9_Ti_20% | 2.9097 | 0.151  | 2925.59 | 2926.296 | 5238.6  | 1 | 236.2  | 28.6 | 1 | R.AVTTVTQSTPVPGPSVPPPEELQVSPGPR.Q                                    |
| *              | HsFLAG-p53-DNA-D   | 4.4515 | 0.361  | 2916.07 | 2915.357 | 7540.1  | 1 | 852.7  | 26.8 | 1 | K.LQAAATLVEANGIESLGVKPDLPKPPSK.A                                     |
| *              | HsFlag-VPS71_Ti_1C | 3.1817 | 0.1127 | 1263.48 | 1263.436 | 8112.3  | 1 | 1289   | 80   | 2 | K.KQELQPGTAYK.F                                                      |
| *              | HsARP6-FLAG_Ti_1   | 3.1266 | 0.1452 | 1490.22 | 1489.687 | 4458.1  | 6 | 624.8  | 65.4 | 1 | K.TCLPGFPGAPCAIK.I                                                   |

|                    |                                                                |                            |                            |                              |                                  |                            |                                                      |                          |                      |                        |                                                                             |
|--------------------|----------------------------------------------------------------|----------------------------|----------------------------|------------------------------|----------------------------------|----------------------------|------------------------------------------------------|--------------------------|----------------------|------------------------|-----------------------------------------------------------------------------|
| *<br>gi 6677723 re | HsFlag-VPS71_Ti_10<br>3                                        | 3.9974<br>4                | 0.5024<br>16.20%           | 1866.7<br>340                | 1867.025<br>38497                | 5547.8<br>7.2              | 1<br>replication factor C 5 isoform 1 [Homo sapiens] | 880.7<br>55.9            | 4                    | K.SPDGAHLTWEPPSVTSGK.I |                                                                             |
| *<br>gi 66933016 r | HsFLAG-Lin9_Ti_200<br>HsFLAG-Lin9_Ti_200<br>HsFlag-VPS71_Ti_10 | 3.6483<br>3.8369<br>5.4382 | 0.3053<br>0.4142<br>0.4518 | 2236.5<br>1735.33<br>2389.23 | 2238.594<br>1735.898<br>2388.657 | 8354.2<br>5791.4<br>8339.1 | 1<br>1<br>1                                          | 804.3<br>541.4<br>1754.8 | 42.1<br>53.6<br>60.5 | 1<br>1<br>2            | K.FINEDRLPHLLLYGPPGTGK.T<br>K.VTEETVYTCTGHPLK.S<br>K.SDIANILDWMLNQDFTTAYR.N |
| *<br>gi 89030025 r | HsFlag-VPS71_Ti_10                                             | 3.0381                     | 0.259                      | 1822.43                      | 1822.111                         | 6527.7                     | 1                                                    | 644.7                    | 53.3                 | 1                      | K.KYEQGFITDPVVLSPK.D                                                        |
| *<br>gi 89030643 r | HsFlag-FLJ90652_200                                            | 2.7049                     | 0.156                      | 1432.14                      | 1431.557                         | 7572.7                     | 2                                                    | 729.2                    | 62.5                 | 1                      | R.HGFCGIPITDTGR.M                                                           |
| *<br>gi 89030641 r | HsFlag-VPS71_Ti_10                                             | 2.6203                     | 0.2131                     | 1480.23                      | 1482.764                         | 11214.2                    | 3                                                    | 901.2                    | 57.7                 | 1                      | K.REDLVVAPAGITLK.E                                                          |
| *<br>gi 89030027 r | HsFlag-FLJ90652_200                                            | 2.7468                     | 0.1511                     | 1064.34                      | 1064.186                         | 5710.3                     | 7                                                    | 642.7                    | 75                   | 1                      | K.NRDYPLASK.D                                                               |
| *<br>gi 89030025 r | HsFLAG-p53-DNA-D                                               | 4.8738                     | 0.507                      | 1892.78                      | 1893.196                         | 6978.9                     | 1                                                    | 1402.1                   | 63.9                 | 4                      | R.FGVPVIADGGIQNVGHIK.A                                                      |
| *<br>gi 89030643 r | HsFlag-VPS71_Ti_10                                             | 2.92                       | 0.3439                     | 1160.23                      | 1159.285                         | 5502.2                     | 1                                                    | 958.8                    | 77.3                 | 2                      | K.VAQQVSGAVQDK.G                                                            |
| *<br>gi 89030641 r | HsFLAG-p53-DNA-D                                               | 3.071                      | 0.2823                     | 1938.96                      | 1940.326                         | 8454                       | 3                                                    | 554.5                    | 47.1                 | 1                      | K.MVMIQDGLPTGADKPLR.I                                                       |
| *<br>gi 89030027 r | HsFlag-VPS71_Ti_10                                             | 3.5539                     | 0.376                      | 2247.9                       | 2248.454                         | 3782.6                     | 1                                                    | 469                      | 47.6                 | 2                      | R.GDWSVGAPGGVQEITYTVPADK.C                                                  |
| *<br>gi 6005854 r  | HsFLAG-FLJ20729_1                                              | 3.1778                     | 0.2306                     | 1567                         | 1567.702                         | 7095.6                     | 1                                                    | 580.2                    | 57.7                 | 2                      | K.SINQQSGAHVELQR.N                                                          |
| *<br>gi 4507357 r  | HsFLAG-Lin9_Ti_200                                             | 3.8672                     | 0.5558                     | 2219.35                      | 2220.363                         | 9502.7                     | 1                                                    | 851.1                    | 44.7                 | 1                      | R.QQVAFYQGTLGQAQAHSSEQ.-                                                    |
| *<br>gi 19923653 r | HsFLAG-ARP6_Ti_10                                              | 3.7083                     | 0.2361                     | 1724.83                      | 1725.043                         | 7442.7                     | 1                                                    | 1357.6                   | 75                   | 2                      | R.IPWFQYPIIYDIR.A                                                           |
| *<br>gi 77404397 r | HsFLAG-ARP6_Ti_10                                              | 4.5322                     | 0.2963                     | 1889.59                      | 1890.167                         | 6841.6                     | 2                                                    | 939.8                    | 60                   | 2                      | R.VLSRPNAQELPSMYQR.L                                                        |
| *<br>gi 5453595 re | HsFLAG-TCF3_Ti_10                                              | 3.6061                     | 0.337                      | 2226.35                      | 2226.491                         | 10500.8                    | 1                                                    | 752                      | 47.2                 | 1                      | R.IYLTADNLVNLQDESFTR.G                                                      |
| *<br>gi 5453595 re | HsFLAG-p53-DNA-D                                               | 4.6551                     | 0.3875                     | 2102.66                      | 2101.32                          | 6519.7                     | 1                                                    | 1298.9                   | 64.7                 | 6                      | R.YGINTTDIFQTVDLWEGK.N                                                      |
| *<br>gi 5453595 re | HsFLAG-p53-DNA-D                                               | 4.282                      | 0.353                      | 1596.44                      | 1595.708                         | 8697.8                     | 1                                                    | 1347.5                   | 69.2                 | 5                      | R.DDGLFSGDPNWFPK.K                                                          |
| *<br>gi 5453595 re | HsFLAG-Lin9_Ti_200                                             | 2.5212                     | 0.2536                     | 1251.4                       | 1251.468                         | 2960.5                     | 1                                                    | 380.7                    | 75                   | 2                      | R.DFKPGDLIFAK.M                                                             |
| *<br>gi 5453595 re | HsFLAG-Lin9_Ti_200                                             | 2.9228                     | 0.138                      | 1566.12                      | 1566.751                         | 5550.6                     | 8                                                    | 680.2                    | 60.7                 | 1                      | R.VDEVPDGAVKPPTNK.L                                                         |
| *<br>gi 5453595 re | HsFLAG-FLJ20729_1                                              | 5.2072                     | 0.5052                     | 1923.42                      | 1923.265                         | 5752.4                     | 1                                                    | 1632.1                   | 78.1                 | 17                     | K.LPIFFFGTHETAFLGPK.D                                                       |
| *<br>gi 5453595 re | HsFLAG-Lin9_Ti_200                                             | 3.463                      | 0.3436                     | 1633.82                      | 1633.758                         | 8029                       | 1                                                    | 881.1                    | 65.4                 | 2                      | K.GFNEGLWEIDNNPK.V                                                          |
| *<br>gi 5453595 re | HsFLAG-p53-DNA-D                                               | 1.9517                     | 0.1876                     | 1084.71                      | 1085.252                         | 3450.9                     | 8                                                    | 153.1                    | 55.6                 | 1                      | K.RGRPAATEVK.I                                                              |
| *<br>gi 5453595 re | HsFLAG-p53-DNA-D                                               | 5.3113                     | 0.3886                     | 1964.8                       | 1965.272                         | 9670.8                     | 1                                                    | 1726.5                   | 64.7                 | 4                      | K.NMFLVGEQDSVITQVLNK.S                                                      |
| *<br>gi 5453595 re | HsFlag-DPCD_Ti_200                                             | 4.6334                     | 0.387                      | 1961.28                      | 1961.093                         | 9999.2                     | 1                                                    | 2112.2                   | 63.9                 | 2                      | K.DTNGENIAESLVAEGLATR.R                                                     |
| *<br>gi 5453595 re | HsFlag-VPS71_Ti_10                                             | 3.6152                     | 0.3002                     | 1148.54                      | 1148.351                         | 5600                       | 1                                                    | 1183.1                   | 88.9                 | 3                      | K.PVNAIIEHVR.D                                                              |
| *<br>gi 5453595 re | HsFlag-VPS71_Ti_10                                             | 3.9986                     | 0.4247                     | 2011.19                      | 2010.483                         | 3649.2                     | 1                                                    | 534.1                    | 58.8                 | 2                      | R.ALLLPDYLLVTMLSGIK.C                                                       |
| *<br>gi 5453595 re | HsFLAG-FLJ20729_1                                              | 4.6376                     | 0.3809                     | 2306.39                      | 2307.562                         | 5338.1                     | 1                                                    | 760.6                    | 55                   | 8                      | R.NLPGLVQEGEPFSEEATLFTK.E                                                   |
| *<br>gi 5453595 re | HsFLAG-FLJ20729_1                                              | 3.4754                     | 0.4268                     | 1710.38                      | 1710.844                         | 3620.6                     | 1                                                    | 519.8                    | 63.3                 | 2                      | R.NDIASHPPVEGSYAPR.R                                                        |
| *<br>gi 5453595 re | HsFLAG-Lin9_Ti_200                                             | 4.0621                     | 0.4073                     | 3509.15                      | 3509.854                         | 6195.5                     | 1                                                    | 1241.1                   | 31.5                 | 1                      | R.VLPAQATEYAFAFIQVPQDDDDARTDAVDSVVR.D                                       |
| *<br>gi 5453595 re | HsFLAG-Lin9_Ti_200                                             | 3.9112                     | 0.214                      | 3299.88                      | 3297.581                         | 12429.3                    | 1                                                    | 778.4                    | 22.3                 | 1                      | R.DIQNTQCLLNVEHLSAGCPHVTLQFADSK.G                                           |
| *<br>gi 5453595 re | HsFlag-VPS71_Ti_10                                             | 3.9974                     | 0.5024                     | 1866.7                       | 1867.025                         | 5547.8                     | 1                                                    | 880.7                    | 55.9                 | 4                      | K.SPDGAHLTWEPPSVTSGK.I                                                      |
| *<br>gi 5453595 re | HsFlag-VPS71_Ti_10                                             | 3.0381                     | 0.259                      | 1822.43                      | 1822.111                         | 6527.7                     | 1                                                    | 644.7                    | 53.3                 | 1                      | K.KYEQGFITDPVVLSPK.D                                                        |
| *<br>gi 5453595 re | HsFlag-FLJ90652_200                                            | 2.7049                     | 0.156                      | 1432.14                      | 1431.557                         | 7572.7                     | 2                                                    | 729.2                    | 62.5                 | 1                      | R.HGFCGIPITDTGR.M                                                           |
| *<br>gi 5453595 re | HsFlag-VPS71_Ti_10                                             | 2.6203                     | 0.2131                     | 1480.23                      | 1482.764                         | 11214.2                    | 3                                                    | 901.2                    | 57.7                 | 1                      | K.REDLVVAPAGITLK.E                                                          |
| *<br>gi 5453595 re | HsFlag-FLJ90652_200                                            | 2.7468                     | 0.1511                     | 1064.34                      | 1064.186                         | 5710.3                     | 7                                                    | 642.7                    | 75                   | 1                      | K.NRDYPLASK.D                                                               |
| *<br>gi 5453595 re | HsFLAG-p53-DNA-D                                               | 4.8738                     | 0.507                      | 1892.78                      | 1893.196                         | 6978.9                     | 1                                                    | 1402.1                   | 63.9                 | 4                      | R.FGVPVIADGGIQNVGHIK.A                                                      |
| *<br>gi 5453595 re | HsFlag-VPS71_Ti_10                                             | 2.92                       | 0.3439                     | 1160.23                      | 1159.285                         | 5502.2                     | 1                                                    | 958.8                    | 77.3                 | 2                      | K.VAQQVSGAVQDK.G                                                            |
| *<br>gi 5453595 re | HsFLAG-p53-DNA-D                                               | 3.071                      | 0.2823                     | 1938.96                      | 1940.326                         | 8454                       | 3                                                    | 554.5                    | 47.1                 | 1                      | K.MVMIQDGLPTGADKPLR.I                                                       |
| *<br>gi 5453595 re | HsFlag-VPS71_Ti_10                                             | 3.5539                     | 0.376                      | 2247.9                       | 2248.454                         | 3782.6                     | 1                                                    | 469                      | 47.6                 | 2                      | R.GDWSVGAPGGVQEITYTVPADK.C                                                  |
| *<br>gi 5453595 re | HsFLAG-FLJ20729_1                                              | 3.1778                     | 0.2306                     | 1567                         | 1567.702                         | 7095.6                     | 1                                                    | 580.2                    | 57.7                 | 2                      | K.SINQQSGAHVELQR.N                                                          |
| *<br>gi 5453595 re | HsFLAG-Lin9_Ti_200                                             | 3.8672                     | 0.5558                     | 2219.35                      | 2220.363                         | 9502.7                     | 1                                                    | 851.1                    | 44.7                 | 1                      | R.QQVAFYQGTLGQAQAHSSEQ.-                                                    |
| *<br>gi 5453595 re | HsFLAG-ARP6_Ti_10                                              | 3.7083                     | 0.2361                     | 1724.83                      | 1725.043                         | 7442.7                     | 1                                                    | 1357.6                   | 75                   | 2                      | R.IPWFQYPIIYDIR.A                                                           |
| *<br>gi 5453595 re | HsFLAG-ARP6_Ti_10                                              | 4.5322                     | 0.2963                     | 1889.59                      | 1890.167                         | 6841.6                     | 2                                                    | 939.8                    | 60                   | 2                      | R.VLSRPNAQELPSMYQR.L                                                        |
| *<br>gi 5453595 re | HsFLAG-TCF3_Ti_10                                              | 3.6061                     | 0.337                      | 2226.35                      | 2226.491                         | 10500.8                    | 1                                                    | 752                      | 47.2                 | 1                      | R.IYLTADNLVNLQDESFTR.G                                                      |
| *<br>gi 5453595 re | HsFLAG-p53-DNA-D                                               | 4.6551                     | 0.3875                     | 2102.66                      | 2101.32                          | 6519.7                     | 1                                                    | 1298.9                   | 64.7                 | 6                      | R.YGINTTDIFQTVDLWEGK.N                                                      |
| *<br>gi 5453595 re | HsFLAG-p53-DNA-D                                               | 4.282                      | 0.353                      | 1596.44                      | 1595.708                         | 8697.8                     | 1                                                    | 1347.5                   | 69.2                 | 5                      | R.DDGLFSGDPNWFPK.K                                                          |
| *<br>gi 5453595 re | HsFLAG-Lin9_Ti_200                                             | 2.5212                     | 0.2536                     | 1251.4                       | 1251.468                         | 2960.5                     | 1                                                    | 380.7                    | 75                   | 2                      | R.DFKPGDLIFAK.M                                                             |
| *<br>gi 5453595 re | HsFLAG-Lin9_Ti_200                                             | 2.9228                     | 0.138                      | 1566.12                      | 1566.751                         | 5550.6                     | 8                                                    | 680.2                    | 60.7                 | 1                      | R.VDEVPDGAVKPPTNK.L                                                         |
| *<br>gi 5453595 re | HsFLAG-FLJ20729_1                                              | 5.2072                     | 0.5052                     | 1923.42                      | 1923.265                         | 5752.4                     | 1                                                    | 1632.1                   | 78.1                 | 17                     | K.LPIFFFGTHETAFLGPK.D                                                       |
| *<br>gi 5453595 re | HsFLAG-Lin9_Ti_200                                             | 3.463                      | 0.3436                     | 1633.82                      | 1633.758                         | 8029                       | 1                                                    | 881.1                    | 65.4                 | 2                      | K.GFNEGLWEIDNNPK.V                                                          |
| *<br>gi 5453595 re | HsFLAG-p53-DNA-D                                               | 1.9517                     | 0.1876                     | 1084.71                      | 1085.252                         | 3450.9                     | 8                                                    | 153.1                    | 55.6                 | 1                      | K.RGRPAATEVK.I                                                              |
| *<br>gi 5453595 re | HsFLAG-p53-DNA-D                                               | 5.3113                     | 0.3886                     | 1964.8                       | 1965.272                         | 9670.8                     | 1                                                    | 1726.5                   | 64.7                 | 4                      | K.NMFLVGEQDSVITQVLNK.S                                                      |
| *<br>gi 5453595 re | HsFlag-DPCD_Ti_200                                             | 4.6334                     | 0.387                      | 1961.28                      | 1961.093                         | 9999.2                     | 1                                                    | 2112.2                   | 63.9                 | 2                      | K.DTNGENIAESLVAEGLATR.R                                                     |
| *<br>gi 5453595 re | HsFlag-VPS71_Ti_10                                             | 3.6152                     | 0.3002                     | 1148.54                      | 1148.351                         | 5600                       | 1                                                    | 1183.1                   | 88.9                 | 3                      | K.PVNAIIEHVR.D                                                              |
| *<br>gi 5453595 re | HsFlag-VPS71_Ti_10                                             | 3.9986                     | 0.4247                     | 2011.19                      | 2010.483                         | 3649.2                     | 1                                                    | 534.1                    | 58.8                 | 2                      | R.ALLLPDYLLVTMLSGIK.C                                                       |
| *<br>gi 5453595 re | HsFLAG-FLJ20729_1                                              | 4.6376                     | 0.3809                     | 2306.39                      | 2307.562                         | 5338.1                     | 1                                                    | 760.6                    | 55                   | 8                      | R.NLPGLVQEGEPFSEEATLFTK.E                                                   |
| *<br>gi 5453595 re | HsFLAG-FLJ20729_1                                              | 3.4754                     | 0.4268                     | 1710.38                      | 1710.844                         | 3620.6                     | 1                                                    | 519.8                    | 63.3                 | 2                      | R.NDIASHPPVEGSYAPR.R                                                        |
| *<br>gi 5453595 re | HsFLAG-Lin9_Ti_200                                             | 4.0621                     | 0.4073                     | 3509.15                      | 3509.854                         | 6195.5                     | 1                                                    | 1241.1                   | 31.5                 | 1                      | R.VLPAQATEYAFAFIQVPQDDDDARTDAVDSVVR.D                                       |
| *<br>gi 5453595 re | HsFLAG-Lin9_Ti_200                                             | 3.9112                     | 0.214                      | 3299.88                      | 3297.581                         | 12429.3                    | 1                                                    | 778.4                    | 22.3                 | 1                      | R.DIQNTQCLLNVEHLSAGCPHVTLQFADSK.G                                           |
| *<br>gi 5453595 re | HsFlag-VPS71_Ti_10                                             | 3.9974                     | 0.5024                     | 1866.7                       | 1867.025                         | 5547.8                     | 1                                                    | 880.7                    | 55.9                 | 4                      | K.SPDGAHLTWEPPSVTSGK.I                                                      |
| *<br>gi 5453595 re | HsFlag-VPS71_Ti_10                                             | 3.0381                     | 0.259                      | 1822.43                      | 1822.111                         | 6527.7                     | 1                                                    | 644.7                    | 53.3                 | 1                      | K.KYEQGFITDPVVLSPK.D                                                        |
| *<br>gi 5453595 re | HsFlag-FLJ90652_200                                            | 2.7049                     | 0.156                      | 1432.14                      | 1431.557                         | 7572.7                     | 2                                                    | 729.2                    | 62.5                 | 1                      | R.HGFCGIPITDTGR.M                                                           |
| *<br>gi 5453595 re | HsFlag-VPS71_Ti_10                                             | 2.6203                     | 0.2131                     | 1480.23                      | 1482.764                         | 11214.2                    | 3                                                    | 901.2                    | 57.7                 | 1                      | K.REDLVVAPAGITLK.E                                                          |
| *<br>gi 5453595 re | HsFlag-FLJ90652_200                                            | 2.7468                     | 0.1511                     | 1064.34                      | 1064.186                         | 5710.3                     | 7                                                    | 642.7                    | 75                   | 1                      | K.NRDYPLASK.D                                                               |
| *<br>gi 5453595 re | HsFLAG-p53-DNA-D                                               | 4.8738                     | 0.507                      | 1892.78                      | 1893.196                         | 6978.9                     | 1                                                    | 1402.1                   | 63.9                 | 4                      | R.FGVPVIADGGIQNVGHIK.A                                                      |
| *<br>gi 5453595 re | HsFlag-VPS71_Ti_10                                             | 2.92                       | 0.3439                     | 1160.23                      | 1159.285                         | 5502.2                     | 1                                                    | 958.8                    | 77.3                 | 2                      | K.VAQQVSGAVQDK.G                                                            |
| *<br>gi 5453595 re | HsFLAG-p53-DNA-D                                               | 3.071                      | 0.2823                     | 1938.96                      | 1940.326                         | 8454                       | 3                                                    | 554.5                    | 47.1                 | 1                      | K.MVMIQDGLPTGADKPLR.I                                                       |
| *<br>gi 5453595 re | HsFlag-VPS71_Ti_10                                             | 3.5539                     | 0.376                      | 2247.9                       | 2248.454                         | 3782.6                     | 1                                                    | 469                      | 47.6                 | 2                      | R.GDWSVGAPGGVQEITYTVPADK.C                                                  |
| *<br>gi 5453595 re | HsFLAG-FLJ20729_1                                              | 3.1778                     | 0.2306                     | 1567                         | 1567.702                         | 7095.6                     | 1                                                    | 580.2                    | 57.7                 | 2                      | K.SINQQSGAHVELQR.N                                                          |
| *<br>gi 5453595 re | HsFLAG-Lin9_Ti_200                                             | 3.8672                     | 0.5558                     | 2219.35                      | 2220.363                         | 9502.7                     | 1                                                    | 851.1                    | 44.7                 | 1                      | R.QQVAFYQGTLGQAQAHSSEQ.-                                                    |
| *<br>gi 5453595 re | HsFLAG-ARP6_Ti_10                                              | 3.7083                     | 0.2361                     | 1724.83                      | 1725.043                         | 7442.7                     | 1                                                    | 1357.6                   | 75                   | 2                      | R.IPWFQYPIIYDIR.A                                                           |
| *<br>gi 5453595 re | HsFLAG-ARP6_Ti_10                                              | 4.5322                     | 0.2963                     | 1889.59                      | 1890.167                         | 6841.6                     | 2                                                    | 939.8                    | 60                   | 2                      | R.VLSRPNAQELPSMYQR.L                                                        |
| *<br>gi 5453595 re | HsFLAG-TCF3_Ti_10                                              | 3.6061                     | 0.337                      | 2226.35                      | 2226.491                         | 10500.8                    | 1                                                    | 752                      | 47.2                 | 1                      | R.IYLTADNLVNLQDESFTR.G                                                      |
| *<br>gi 5453595 re | HsFLAG-p53-DNA-D                                               | 4.6551                     | 0.3875                     | 2102.66                      | 2101.32                          | 6519.7                     | 1                                                    | 1298.9                   | 64.7                 | 6                      | R.YGINTTDIFQTVDLWEGK.N                                                      |
| *<br>gi 5453595 re | HsFLAG-p53-DNA-D                                               | 4.282                      | 0.353                      | 1596.44                      | 1595.708                         | 8697.8                     | 1                                                    | 1347.5                   | 69.2                 | 5                      | R.DDGLFSGDPNWFPK.K                                                          |
| *<br>gi 5453595 re | HsFLAG-Lin9_Ti_200                                             | 2.5212                     | 0.2536                     | 1251.4                       | 1251.468                         | 2960.5                     | 1                                                    | 380.7                    | 75                   | 2                      | R.DFKPGDLIFAK.M                                                             |
| *<br>gi 5453595 re | HsFLAG-Lin9_Ti_200                                             | 2.9228                     | 0.138                      | 1566.12                      | 1566.751                         | 5550.6                     | 8                                                    | 680.2                    | 60.7                 | 1                      | R.VDEVPDGAVKPPTNK.L                                                         |
| *<br>gi 5          |                                                                |                            |                            |                              |                                  |                            |                                                      |                          |                      |                        |                                                                             |

|                |                    |        |        |         |          |         |                                                                          |        |      |    |                              |
|----------------|--------------------|--------|--------|---------|----------|---------|--------------------------------------------------------------------------|--------|------|----|------------------------------|
| *              | HsFLAG-FLJ20729_   | 5.3109 | 0.4578 | 2353.52 | 2352.692 | 6947    | 1                                                                        | 1415.6 | 59.1 | 4  | K.AGAAPYVQAFDSLLAGPVAEYLK.I  |
| *              | HsFLAG-FLJ20729_   | 3.3533 | 0.2373 | 1758.36 | 1758.935 | 7472.6  | 1                                                                        | 703.2  | 53.3 | 1  | R.ALLVTASQCQQAENK.L          |
| *              | HsFLAG-FLJ20729_   | 2.8638 | 0.1788 | 1928.12 | 1929.183 | 10952.3 | 1                                                                        | 877.7  | 50   | 1  | R.SALFAQINQGESITHALK.H       |
| *              | HsFLAG-Lin9_Ti_20% | 2.9734 | 0.236  | 2075.62 | 2074.249 | 8457.6  | 1                                                                        | 661.3  | 47.1 | 1  | R.VENQENVSNLVIETELK.Q        |
| gij 8393159 re | 1                  | 3      | 15.80% | 146     | 15921    | 4.4     | calmodulin-like skin protein [Homo sapiens]                              |        |      |    |                              |
| *              | HsYL1-FLAG_Ti_20%  | 4.5624 | 0.439  | 2265.04 | 2264.454 | 7874.6  | 1                                                                        | 680.2  | 40.9 | 3  | K.AFSAVDTDNGNTINAQELGAALK.A  |
| gij 57164975 r | 22                 | 52     | 15.70% | 1411    | 144314   | 9       | Treacher Collins-Franceschetti syndrome 1 isoform b [Homo sapiens]       |        |      |    |                              |
|                | HsFLAG-p53-DNA-D   | 3.4659 | 0.2728 | 1517.6  | 1517.858 | 4878.9  | 1                                                                        | 930.6  | 81.8 | 4  | R.ELPLIYHLLR.A               |
|                | HsSrcap_Ti_205.461 | 4.6284 | 0.3437 | 2878.19 | 2878.223 | 4642.8  | 1                                                                        | 476.2  | 30.4 | 2  | K.CFLAQPVTLDDIYTHWQQTSELGR.K |
|                | HsFLAG-p53-DNA-D   | 2.8321 | 0.1301 | 1090.01 | 1088.206 | 6541.4  | 1                                                                        | 1022.8 | 72.7 | 3  | K.TSQVGAASAPAK.E             |
|                | HsFLAG-p53-DNA-D   | 2.7946 | 0.2215 | 1557.63 | 1557.704 | 6734.6  | 1                                                                        | 682    | 56.7 | 1  | K.TSQVGAASAPAKESPR.K         |
|                | HsFLAG-p53-DNA-D   | 3.339  | 0.2444 | 893.65  | 894.062  | 5100.3  | 1                                                                        | 1519.9 | 100  | 3  | R.KGAAPPPGK.T                |
|                | HsFLAG-p53-DNA-D   | 2.6671 | 0.2232 | 893.68  | 894.062  | 4322.4  | 1                                                                        | 708.9  | 72.2 | 2  | R.KGAAPPPGK.T                |
|                | HsFLAG-p53-DNA-D   | 2.4207 | 0.2025 | 864.71  | 865.023  | 5194.2  | 6                                                                        | 448.9  | 75   | 1  | R.KGAAPPPR.K                 |
|                | HsFLAG-p53-DNA-D   | 4.2051 | 0.2378 | 1613.35 | 1612.867 | 9721.1  | 6                                                                        | 818    | 53.3 | 13 | K.SLGNILQAKPTSSPAK.G         |
|                | HsFLAG-p53-DNA-D   | 2.1986 | 0.1507 | 868.56  | 869.052  | 6023.1  | 6                                                                        | 451.7  | 62.5 | 1  | K.AGPVAVQVK.A                |
|                | HsARP6-FLAG_Ti_1   | 3.2048 | 0.3615 | 1282.29 | 1282.483 | 7223    | 1                                                                        | 898.1  | 61.5 | 1  | K.GSLGQGTAPVLPKG.T           |
|                | HsFLAG-p53-DNA-D   | 2.1616 | 0.1628 | 930.5   | 931.077  | 6378.3  | 4                                                                        | 500.3  | 68.8 | 1  | K.TGPTVTQVK.A                |
|                | HsFlag-VPS71_Ti_1  | 2.8238 | 0.3319 | 931.48  | 931.077  | 4185.9  | 3                                                                        | 614.9  | 81.2 | 1  | K.TGPTVTQVK.A                |
|                | HsFLAG-p53-DNA-D   | 2.5064 | 0.1651 | 858.56  | 859.013  | 9432.8  | 7                                                                        | 754.3  | 68.8 | 1  | K.VVTAQAQAK.Q                |
|                | HsFLAG-p53-DNA-D   | 2.6336 | 0.0943 | 859.19  | 859.013  | 3747.6  | 2                                                                        | 521.4  | 81.2 | 1  | K.VVTAQAQAK.Q                |
|                | HsFLAG-p53-DNA-D   | 2.6389 | 0.1696 | 1099.57 | 1100.22  | 3109.7  | 3                                                                        | 214.3  | 72.2 | 1  | R.NPQNSTVLAR.G               |
|                | HsFLAG-p53-DNA-D   | 2.2368 | 0.1466 | 923.63  | 924.088  | 4292.4  | 3                                                                        | 565.3  | 72.2 | 2  | R.KGAAPPPGK.T                |
|                | HsFLAG-p53-DNA-D   | 4.7369 | 0.4991 | 1751.65 | 1750.909 | 4614.7  | 1                                                                        | 786.3  | 61.1 | 3  | R.SPAGPAATPAQAQAASPR.K       |
|                | HsFlag-VPS71_Ti_1  | 3.52   | 0.3591 | 1325.59 | 1324.541 | 4675.2  | 1                                                                        | 815.1  | 72.7 | 3  | R.TNVVTMPTAHPR.I             |
| *              | HsFlag-VPS71_Ti_1  | 3.2037 | 0.2691 | 1323.71 | 1324.563 | 5802.1  | 2                                                                        | 503.7  | 58.3 | 2  | K.NPASLPLTQAALK.V            |
| *              | HsFLAG-Lin9_Ti_20% | 3.3285 | 0.2885 | 1324.35 | 1324.563 | 4153    | 1                                                                        | 547.6  | 70.8 | 3  | K.NPASLPLTQAALK.V            |
|                | HsFLAG-FLJ20729_   | 3.1059 | 0.2714 | 1388.37 | 1388.474 | 6167.5  | 1                                                                        | 816.7  | 64.3 | 2  | K.LGAGEGGEASVSPEK.T          |
|                | HsFLAG-p53-DNA-D   | 2.9988 | 0.1156 | 1379.7  | 1377.469 | 8777.6  | 1                                                                        | 1110.9 | 65.4 | 1  | K.GMGTVEGGDQSNPK.S           |
| gij 42476130 r | 7                  | 12     | 15.70% | 719     | 79728    | 5.4     | retinoid x receptor interacting protein [Homo sapiens]                   |        |      |    |                              |
| *              | HsScrap_Ti_106.216 | 3.7549 | 0.4305 | 1710.43 | 1710.844 | 8128.1  | 1                                                                        | 887.5  | 60   | 3  | R.SRPLATGPSSQSHQEK.T         |
| *              | HsSrcap_Ti_202.451 | 3.3851 | 0.2571 | 2190.59 | 2190.501 | 4429.8  | 3                                                                        | 483.1  | 47.4 | 2  | K.TTDSGLTEGIWQLVPPSLFK.G     |
| *              | HsSrcap_Ti_204.167 | 2.2396 | 0.2677 | 1125.53 | 1126.264 | 6462.1  | 1                                                                        | 493.4  | 61.1 | 1  | R.HCLPTLADAK.G               |
| *              | HsSrcap_Ti_202.245 | 4.6924 | 0.3126 | 4229.63 | 4229.509 | 4641.1  | 1                                                                        | 420.2  | 21.9 | 1  | K.R                          |
| *              | HsSrcap_Ti_201.076 | 4.0224 | 0.3895 | 1509.31 | 1509.567 | 6513.3  | 1                                                                        | 1177.6 | 67.9 | 2  | K.SDSGTAQAQTSLEDIDK.N        |
| *              | HsSrcap_Ti_203.202 | 2.9025 | 0.1338 | 1330.49 | 1331.511 | 4871.8  | 8                                                                        | 382.6  | 65   | 1  | R.LLSFLEQSEHK.T              |
| *              | HsSrcap_Ti_203.202 | 3.1226 | 0.1585 | 1331.46 | 1331.511 | 8557    | 1                                                                        | 1186.9 | 80   | 2  | R.LLSFLEQSEHK.T              |
| gij 4502389 re | 1                  | 2      | 15.70% | 89      | 10059    | 6.1     | barrier to autointegration factor 1 [Homo sapiens]                       |        |      |    |                              |
| gij 88959141 r | 1                  | 2      | 16.30% | 86      | 9740     | 6.1     | PREDICTED: similar to barrier to autointegration factor 1 [Homo sapiens] |        |      |    |                              |
| gij 88953904 r | 1                  | 2      | 16.30% | 86      | 9740     | 6.1     | PREDICTED: similar to barrier to autointegration factor 1 [Homo sapiens] |        |      |    |                              |
|                | HsFlag-VPS71_Ti_1  | 4.7041 | 0.359  | 1297.67 | 1297.538 | 6028.1  | 1                                                                        | 1685.5 | 84.6 | 2  | K.PVGSLAGIGEVLGK.K           |
| gij 19923142 r | 8                  | 23     | 15.60% | 876     | 97170    | 4.8     | karyopherin beta 1 [Homo sapiens]                                        |        |      |    |                              |
| *              | HsFlag-FLJ90652_2  | 3.2663 | 0.1423 | 1557.97 | 1557.744 | 7128.2  | 5                                                                        | 633.4  | 61.5 | 1  | K.TVSPDRLELEAAQK.F           |

|                |                     |        |        |         |          |         |   |        |      |                                                                                             |
|----------------|---------------------|--------|--------|---------|----------|---------|---|--------|------|---------------------------------------------------------------------------------------------|
| *              | HsFLAG-p53-DNA-D    | 4.085  | 0.3033 | 1659.67 | 1659.923 | 4574.5  | 1 | 1141.1 | 75   | 8 R.AAVENLPTFLVELSR.V                                                                       |
| *              | HsFlag-DPCD_Ti_20   | 3.767  | 0.3816 | 2566.7  | 2566.744 | 8126.7  | 1 | 979.4  | 47.6 | 1 K.ESTLEAIGYICQDIDPEQLQDK.S                                                                |
| *              | HsFLAG-ARP6_Ti_1    | 4.7285 | 0.3513 | 1608.1  | 1606.86  | 7838.5  | 1 | 1962.6 | 78.6 | 4 K.LAATNALLNSLEFTK.A                                                                       |
| *              | HsFLAG-p53-DNA-D    | 3.4827 | 0.2163 | 1761.42 | 1760.127 | 3920.9  | 3 | 540.5  | 60   | 3 K.GALQYLVPILTQTLTK.Q                                                                      |
| *              | HsFLAG-ARP6_Ti_1    | 3.53   | 0.375  | 1766.17 | 1766.651 | 10410.5 | 1 | 1028.5 | 61.5 | 2 K.QDENDDDDWNPCK.A                                                                         |
| *              | HsFLAG-p53-DNA-D    | 3.5391 | 0.3946 | 2290.47 | 2290.708 | 10387   | 1 | 992.3  | 45.2 | 1 R.SVKPQILSVFGDIALAIGGEFK.K                                                                |
| *              | HsFLAG-Lin9_Ti_20   | 5.543  | 0.4555 | 2147.95 | 2148.421 | 11871   | 1 | 2349.3 | 63.9 | 3 K.YLEVVLNTLQQASQAQVDK.S                                                                   |
| gij 41872577 r |                     | 5      | 8      | 15.60%  | 578      | 63146   |   |        |      | 5.7 raft-linking protein [Homo sapiens]                                                     |
| *              | HsFLAG-ARP6_Ti_1    | 4.427  | 0.398  | 1997.98 | 1997.255 | 6065.8  | 1 | 959.1  | 61.1 | 1 R.FLEFTTLSAAELPGSSAVR.L                                                                   |
| *              | HsFLAG-ARP6_Ti_1    | 3.3342 | 0.229  | 1173.5  | 1173.355 | 6717.9  | 1 | 1261.4 | 80   | 2 K.KIQEAASQGLK.F                                                                           |
| *              | HsFLAG-ARP6_Ti_1    | 5.4422 | 0.361  | 3136.18 | 3137.346 | 5391.6  | 1 | 732.6  | 30.8 | 2 K.FVGVIPQYHSSVNSAGSSAPVSTANSTEDAR.D                                                       |
| *              | HsFLAG-ARP6_Ti_1    | 3.233  | 0.3634 | 1246.09 | 1245.301 | 6863.4  | 1 | 862.5  | 66.7 | 2 K.PGTGDVCSAPAGR.N                                                                         |
| *              | HsFLAG-ARP6_Ti_1    | 2.6011 | 0.1432 | 1761.94 | 1762.781 | 7437.4  | 2 | 678.1  | 53.3 | 1 R.DGDAEEVRELGTVEEN.-                                                                      |
| gij 7661920 re |                     | 5      | 21     | 15.60%  | 411      | 46871   |   |        |      | 6.7 DEAD (Asp-Glu-Ala-Asp) box polypeptide 48 [Homo sapiens]                                |
|                | HsFLAG-Lin9_Ti_20   | 2.3621 | 0.254  | 1047.39 | 1048.183 | 9240.5  | 1 | 837.8  | 75   | 2 R.GIYAYGFEK.P                                                                             |
|                | HsFLAG-ARP6_Ti_1    | 4.6012 | 0.3935 | 1829.59 | 1829.065 | 4460.2  | 1 | 954.3  | 73.3 | 7 R.GIYAYGFEKPSAIQQR.A                                                                      |
| *              | HsFLAG-ARP6_Ti_1    | 3.4378 | 0.2988 | 1404.24 | 1404.523 | 7366.4  | 1 | 650.6  | 61.5 | 3 K.GRDVIAQSQSGTGK.T                                                                        |
| *              | HsFLAG-Lin9_Ti_20   | 4.4609 | 0.3604 | 1598.38 | 1598.802 | 9859.5  | 1 | 1928.3 | 75   | 2 R.KLDYQGHHVAVGTPGR.V                                                                      |
| *              | HsFLAG-Lin9_Ti_20   | 4.6985 | 0.3577 | 2140.75 | 2141.432 | 9536    | 1 | 2016.8 | 61.1 | 7 R.GLDVPPVSLIINYDLPNNR.E                                                                   |
| gij 16554627 r |                     | 3      | 7      | 15.60%  | 334      | 36589   |   |        |      | 8.3 WD repeat domain 5 [Homo sapiens]                                                       |
| gij 16554629 r |                     | 3      | 7      | 15.60%  | 334      | 36589   |   |        |      | 8.3 WD repeat domain 5 [Homo sapiens]                                                       |
|                | HsFLAG-FLJ20436_    | 2.9323 | 0.3416 | 2279.4  | 2280.45  | 9468.2  | 1 | 519.9  | 35.7 | 1 K.LGISDVAWSSDSNLLVSASDDK.T                                                                |
|                | HsFLAG-Lin9_Ti_20   | 3.456  | 0.5083 | 1748.42 | 1748.939 | 5681.3  | 1 | 819    | 66.7 | 2 K.TLPAHSDPVSAVHFNR.D                                                                      |
|                | HsFLAG-FLJ20436_    | 4.0442 | 0.3787 | 1559.76 | 1560.744 | 5002.1  | 1 | 1211.2 | 76.9 | 4 K.TLIDDDNPPVSVFK.F                                                                        |
| gij 23308579 r |                     | 2      | 2      | 15.60%  | 160      | 18697   |   |        |      | 4.5 unactive progesterone receptor, 23 kD [Homo sapiens]                                    |
| gij 88950407 r |                     | 2      | 2      | 15.60%  | 160      | 18695   |   |        |      | 4.6 PREDICTED: similar to unactive progesterone receptor, 23 kD [Homo sapiens]              |
| gij 27481323 r |                     | 2      | 2      | 15.60%  | 160      | 18694   |   |        |      | 4.6 PREDICTED: similar to unactive progesterone receptor, 23 kD [Homo sapiens]              |
|                | HsFLAG-RPB5MP_2     | 2.7614 | 0.1706 | 1448.47 | 1446.566 | 8513    | 1 | 1210.9 | 70.8 | 1 K.LTFSCLLGGSDNFK.H                                                                        |
|                | HsFlag-FLJ90652_2   | 2.7645 | 0.1441 | 1538.65 | 1536.73  | 7438.5  | 9 | 508.8  | 54.5 | 1 K.LNWLVSVDVFNWV.K                                                                         |
| gij 46276893 r |                     | 1      | 5      | 15.50%  | 161      | 17911   |   |        |      | 6.1 elongin B isoform b [Homo sapiens]                                                      |
| gij 6005890 re |                     | 1      | 5      | 21.20%  | 118      | 13133   |   |        |      | 4.9 elongin B isoform a [Homo sapiens]                                                      |
|                | HsFlag-NUFIP_Ti_11  | 5.4914 | 0.4288 | 2637.65 | 2637.921 | 6981.7  | 1 | 1408.2 | 37.5 | 5 K.TLGECEGFTSQTARPQAPATVGLAFR.A                                                            |
| gij 46249412 r |                     | 12     | 38     | 15.40%  | 1396     | 152978  |   |        |      | 5.1 latent transforming growth factor beta binding protein 1 isoform LTBP-1S [Homo sapiens] |
| gij 46249414 r |                     | 12     | 38     | 12.50%  | 1722     | 186838  |   |        |      | 6 latent transforming growth factor beta binding protein 1 isoform LTBP-1L [Homo sapiens]   |
|                | Hs293Flag-les2_Ti_1 | 3.8279 | 0.2544 | 1406.41 | 1406.634 | 4178.3  | 1 | 723.6  | 75   | 7 K.LCQIPVHGASVPK.L                                                                         |
|                | HsFLAG-ARP6_Ti_1    | 3.2833 | 0.2383 | 1584.75 | 1585.763 | 3585.1  | 1 | 407    | 69.2 | 1 K.HPPEASVQIHQVSR.I                                                                        |
|                | HsFLAG-ARP6_Ti_1    | 4.8605 | 0.1708 | 2606.2  | 2606.944 | 8964    | 1 | 842.4  | 30.7 | 2 K.TQTIHSTYSHQQVIPHYVPAAK.T                                                                |
|                | HsFlag-NUFIP_Ti_10  | 3.7018 | 0.2608 | 2475.8  | 2476.708 | 4944.7  | 1 | 560.9  | 45.5 | 6 K.IGFGPDPTFSSCVDPPIVISEEK.G                                                               |
|                | HsFLAG-ARP6_Ti_1    | 3.7745 | 0.2397 | 2304.51 | 2304.608 | 5106.2  | 4 | 439    | 31.2 | 1 K.STHPPPLPAKEEPVEALTFSR.E                                                                 |
|                | Hs293Flag-les2_Ti_1 | 3.5202 | 0.4362 | 1815.22 | 1815.977 | 8026.1  | 1 | 947.1  | 55.9 | 3 R.EHGGVVAEPEVATAPPEK.E                                                                    |
|                | HsFLAG-ARP6_Ti_1    | 3.8508 | 0.2979 | 2038.76 | 2039.062 | 8190    | 1 | 1737.9 | 68.8 | 3 R.DIDECQQGNLCVNGQCK.N                                                                     |
|                | HsFLAG-Lin9_Ti_20   | 3.9637 | 0.2599 | 1819.06 | 1819.917 | 8909.8  | 2 | 1196.2 | 60   | 1 R.TSTDLDVDVDQPKKEK.K                                                                      |
|                | HsFLAG-TCF3_Ti_10   | 3.7096 | 0.428  | 1786.69 | 1786.849 | 6379.7  | 1 | 1245.6 | 67.6 | 4 K.GFVPAGESSEAGGENYK.D                                                                     |

|             |                     |        |        |         |          |        |   |        |      |   |                                                                                                    |
|-------------|---------------------|--------|--------|---------|----------|--------|---|--------|------|---|----------------------------------------------------------------------------------------------------|
|             | HsFLAG-RPB5MP_2     | 3.2069 | 0.2752 | 1698.29 | 1698.799 | 7334.1 | 1 | 1179.9 | 65.4 | 2 | K.DADECLLFGQEICK.N                                                                                 |
|             | Hs293Flag-Ies2_Ti_1 | 4.5331 | 0.4552 | 2039.23 | 2040.138 | 7626.4 | 1 | 850.9  | 60   | 2 | K.NGFCLNTRPGYECYCK.Q                                                                               |
|             | HsFLAG-ARP6_Ti_1    | 5.1086 | 0.4391 | 2620.27 | 2620.788 | 4962   | 1 | 928.6  | 54.8 | 6 | R.DALVDFSEQYTPEADPYFIQDR.F                                                                         |
| gi 17402900 |                     | 6      | 13     | 15.40%  | 644      | 67560  |   |        |      |   | 7.6 far upstream element-binding protein [Homo sapiens]                                            |
| *           | HsFlag-VPS71_Ti_1   | 4.2866 | 0.4116 | 1975.73 | 1975.036 | 6345.3 | 1 | 1342.5 | 57.9 | 3 | K.IGGDAGTSLNSNDYGYGGQK.R                                                                           |
| *           | HsFlag-VPS71_Ti_1   | 3.3498 | 0.3584 | 1261.81 | 1261.525 | 5887   | 1 | 1438.5 | 90.9 | 1 | K.VPDGMVGFIIGR.G                                                                                   |
| *           | HsFlag-VPS71_Ti_1   | 3.5228 | 0.2469 | 1354.94 | 1353.518 | 3943.9 | 2 | 745.6  | 70.8 | 1 | K.IQIAPDSGGLPER.S                                                                                  |
| *           | HsFlag-VPS71_Ti_1   | 3.8088 | 0.1738 | 1505.69 | 1504.64  | 3714   | 2 | 677.4  | 75   | 2 | R.IQFKPDDGTTPER.I                                                                                  |
| *           | HsFlag-VPS71_Ti_1   | 4.4256 | 0.3462 | 1540.68 | 1540.726 | 7611.8 | 1 | 1801.8 | 83.3 | 5 | R.CQHAAEITDLLR.S                                                                                   |
| *           | HsFlag-VPS71_Ti_1   | 3.9121 | 0.4022 | 2910.12 | 2910.19  | 4711.8 | 1 | 498.7  | 44.4 | 1 | K.MGQAVPAPTGAPPGGQPDYSAAWAEYYR.Q                                                                   |
| gi 4506031  |                     | 3      | 4      | 15.40%  | 306      | 34193  |   |        |      |   | 6.5 palmitoyl-protein thioesterase 1 (ceroid-lipofuscinosis, neuronal 1, infantile) [Homo sapiens] |
| *           | HsFLAG-ARP6_Ti_1    | 3.3587 | 0.3612 | 1530.75 | 1530.891 | 4402.9 | 1 | 889.4  | 76.9 | 1 | K.KIPGIYVLSLEIGK.T                                                                                 |
| *           | HsFLAG-ARP6_Ti_1    | 5.0171 | 0.4902 | 2003.75 | 2003.243 | 6182.2 | 1 | 1791.7 | 76.5 | 1 | K.LQQGYNAMGFSQGGQFLR.A                                                                             |
| *           | HsFLAG-ARP6_Ti_1    | 3.0879 | 0.2176 | 1794.49 | 1794.956 | 4840.5 | 1 | 579    | 60.7 | 2 | K.ETIPLQETSPLYTQDR.L                                                                               |
| gi 8922498  |                     | 2      | 2      | 15.30%  | 261      | 29988  |   |        |      |   | 7.1 pyridoxine 5'-phosphate oxidase [Homo sapiens]                                                 |
| *           | HsFLAG-ARP6_Ti_1    | 3.691  | 0.3573 | 2297.4  | 2298.56  | 7577.4 | 1 | 1034.1 | 52.8 | 1 | K.ELDSNPFASLVFYWEPLNR.Q                                                                            |
| *           | HsFLAG-ARP8_Ti_2    | 3.7284 | 0.4303 | 2546.66 | 2547.85  | 4319.8 | 1 | 336.2  | 40   | 1 | K.SWGGYVLYPQVMEFWQQTNR.L                                                                           |
| gi 11415026 |                     | 5      | 10     | 15.30%  | 176      | 20762  |   |        |      |   | 10.7 ribosomal protein L18a [Homo sapiens]                                                         |
| gi 88954764 |                     | 5      | 10     | 16.30%  | 166      | 19523  |   |        |      |   | 10.7 PREDICTED: similar to ribosomal protein L18a isoform 6 [Homo sapiens]                         |
| gi 88954757 |                     | 5      | 10     | 15.30%  | 176      | 20767  |   |        |      |   | 10.7 PREDICTED: similar to ribosomal protein L18a isoform 4 [Homo sapiens]                         |
| gi 88953058 |                     | 5      | 10     | 16.30%  | 166      | 19523  |   |        |      |   | 10.7 PREDICTED: similar to ribosomal protein L18a isoform 3 [Homo sapiens]                         |
| gi 27480190 |                     | 5      | 10     | 15.30%  | 176      | 20767  |   |        |      |   | 10.7 PREDICTED: similar to ribosomal protein L18a isoform 1 [Homo sapiens]                         |
|             | HsFLAG-ARP6_Ti_1    | 2.5593 | 0.0829 | 1095.4  | 1096.318 | 5570.4 | 2 | 792.6  | 77.8 | 1 | R.IFAPNHVAK.S                                                                                      |
|             | HsFLAG-ARP6_Ti_1    | 2.637  | 0.2489 | 1217.21 | 1218.44  | 8745.7 | 1 | 944.7  | 75   | 1 | R.FWYFVSQLK.K                                                                                      |
|             | HsFLAG-ARP6_Ti_1    | 3.0529 | 0.2647 | 1218.36 | 1218.44  | 3211.1 | 1 | 716.7  | 87.5 | 6 | R.FWYFVSQLK.K                                                                                      |
|             | HsFLAG-TCF3_Ti_1    | 2.4451 | 0.1928 | 927.46  | 928.138  | 5634.2 | 6 | 702.6  | 78.6 | 1 | R.AHSIQIMK.V                                                                                       |
|             | HsFLAG-ARP6_Ti_1    | 2.7211 | 0.1453 | 928.29  | 928.138  | 3776.4 | 2 | 519.4  | 85.7 | 1 | R.AHSIQIMK.V                                                                                       |
| gi 89052285 |                     | 10     | 14     | 15.20%  | 1278     | 138244 |   |        |      |   | 8.4 PREDICTED: hypothetical protein LOC57662 [Homo sapiens]                                        |
| gi 89057109 |                     | 10     | 14     | 15.20%  | 1278     | 138244 |   |        |      |   | 8.4 PREDICTED: similar to Protein KIAA1543 [Homo sapiens]                                          |
|             | HsARP6-FLAG_Ti_1    | 4.0941 | 0.4387 | 2216.15 | 2214.613 | 6698.6 | 1 | 1219.2 | 38.8 | 1 | R.QALPQLETPPNPSALLALLAR.R                                                                          |
|             | HsFLAG-Lin9_Ti_20   | 3.644  | 0.1595 | 3660.68 | 3661.094 | 10033  | 2 | 568.1  | 21.1 | 1 | R.RAPCFPTVTSLQDLASGAALAATIHCYCPQLLR.L                                                              |
|             | HsFLAG-p53-DNA-D    | 2.6436 | 0.1841 | 1446.77 | 1446.649 | 3241.5 | 1 | 350    | 65.4 | 1 | R.HPLLSSGGPQSPLR.G                                                                                 |
|             | HsFLAG-p53-DNA-D    | 3.5426 | 0.242  | 3037.1  | 3035.381 | 4367   | 2 | 358.8  | 27.8 | 1 | R.TPTQPPPEPGLPTIEEALQIIHSAEPR.L                                                                    |
|             | HsFLAG-ARP6_Ti_2    | 2.8946 | 0.3326 | 1332.12 | 1332.453 | 3651.1 | 1 | 485.4  | 65.4 | 3 | K.AVASSPAATNSEVK.M                                                                                 |
|             | HsFLAG-p53-DNA-D    | 4.0054 | 0.4408 | 2256.74 | 2256.48  | 5624.3 | 1 | 489.7  | 45   | 2 | K.AVTFSPDLGVPHEGLGEYNR.A                                                                           |
|             | HsFLAG-p53-DNA-D    | 3.553  | 0.341  | 1696.6  | 1696.947 | 4186.7 | 1 | 553.6  | 64.3 | 1 | R.VLTPPHDVDSLPHLR.K                                                                                |
|             | HsARP6-FLAG_Ti_1    | 2.5729 | 0.2878 | 1057.2  | 1055.133 | 8232.7 | 6 | 854.9  | 77.8 | 1 | R.APAEEEEVPR.K                                                                                     |
|             | HsFlag-VPS71_Ti_1   | 3.318  | 0.3609 | 2447.45 | 2447.707 | 8288.2 | 1 | 415.7  | 31.8 | 1 | K.IYSQSTLSLSTVANEAHNNLGVK.R                                                                        |
|             | HsFLAG-p53-DNA-D    | 3.6657 | 0.3019 | 1741.78 | 1741.963 | 9859.5 | 1 | 658.7  | 50   | 2 | K.FIIHNALSHCCLAGK.V                                                                                |
| gi 68509926 |                     | 8      | 20     | 15.20%  | 795      | 90933  |   |        |      |   | 7.5 DEAH (Asp-Glu-Ala-His) box polypeptide 15 [Homo sapiens]                                       |
| *           | HsFlag-NUFIP_Ti_1   | 3.2916 | 0.1637 | 1332.54 | 1332.588 | 4728.1 | 1 | 693.3  | 77.8 | 2 | K.RLQLPVWEYK.D                                                                                     |
| *           | HsFLAG-ARP6_Ti_1    | 3.6624 | 0.2988 | 1448.14 | 1446.603 | 7460.4 | 1 | 960.4  | 69.2 | 3 | R.HQSFVLVGETGSGK.T                                                                                 |
| *           | HsFLAG-ARP6_Ti_1    | 4.0161 | 0.3048 | 1275.93 | 1275.59  | 5368.4 | 2 | 1078.9 | 81.8 | 2 | R.TLATDILMGVLK.E                                                                                   |

|              |                      |        |        |         |          |         |   |                                                                                  |      |    |                                     |  |
|--------------|----------------------|--------|--------|---------|----------|---------|---|----------------------------------------------------------------------------------|------|----|-------------------------------------|--|
| *            | HsFLAG-Lin9_Ti_20%   | 4.4843 | 0.4076 | 1954.7  | 1955.23  | 8541.3  | 1 | 1494.2                                                                           | 66.7 | 5  | K.FQIYFDNCPLLTIPGR.T                |  |
| *            | HsARP6-FLAG_Ti_1     | 3.0881 | 0.2929 | 1430.32 | 1429.743 | 9565.2  | 1 | 1219.4                                                                           | 70.8 | 2  | R.IRVESLLVTAISK.A                   |  |
| *            | HsFLAG-ARP6_Ti_1     | 3.9616 | 0.3185 | 1158.38 | 1158.384 | 6707.8  | 1 | 1328                                                                             | 85   | 3  | R.SNLGSVVLQLK.K                     |  |
| *            | HsFLAG-ARP6_Ti_1     | 4.0309 | 0.3509 | 1735.4  | 1736.042 | 8206.7  | 1 | 1403.3                                                                           | 67.9 | 2  | K.ALVTGYFMQVAHLER.T                 |  |
| *            | HsFLAG-p53-DNA-D     | 4.6177 | 0.2047 | 3551.49 | 3552.024 | 7975.4  | 1 | 775.5                                                                            | 25   | 1  | K.DNQVVQLHPSTVLDHDKPEWVLYNEFVLTTK.N |  |
| gij 34419635 | r                    | 12     | 269    | 15.20%  | 643      | 71028   |   | 6.1 heat shock 70kDa protein 6 (HSP70B') [Homo sapiens]                          |      |    |                                     |  |
|              | HsFlag-FLJ90652_2%   | 3.6517 | 0.3726 | 1487.89 | 1488.594 | 3812.9  | 1 | 610.4                                                                            | 75   | 34 | R.TTPSYVAFTDTER.L                   |  |
|              | Hs293Flag-les2_Ti_1  | 3.2174 | 0.4318 | 1488.58 | 1488.594 | 3710.2  | 1 | 167.1                                                                            | 54.2 | 6  | R.TTPSYVAFTDTER.L                   |  |
|              | HsFlag-FLJ90652_2%   | 5.0718 | 0.2176 | 1688.21 | 1688.921 | 6740.8  | 1 | 1838.4                                                                           | 51.7 | 10 | R.IINEPTAAAIAYGLDR.R                |  |
|              | HsFLAG-ARP6_Ti_1     | 5.4263 | 0.43   | 1689.04 | 1688.921 | 5489.6  | 1 | 1548.3                                                                           | 80   | 52 | R.IINEPTAAAIAYGLDR.R                |  |
|              | HsFlag-ZnF-HIT2_Ti_1 | 4.6766 | 0.4075 | 1675.9  | 1676.696 | 6824.2  | 1 | 1767                                                                             | 76.7 | 48 | K.ATAGDTHLGGEDFDNR.L                |  |
|              | HsFLAG-ARP6_Ti_1     | 3.982  | 0.2027 | 1543.2  | 1543.686 | 7726    | 1 | 1819.5                                                                           | 56.8 | 8  | R.ARFEELCSDFR.S                     |  |
|              | HsFLAG-TIP49b_Ti_1   | 2.8901 | 0.2543 | 1543.7  | 1543.686 | 5209.7  | 8 | 240.3                                                                            | 54.5 | 1  | R.ARFEELCSDFR.S                     |  |
|              | HsFlag-FLJ90652_2%   | 4.4813 | 0.316  | 1544.45 | 1543.686 | 5279.2  | 1 | 1248.6                                                                           | 86.4 | 92 | R.ARFEELCSDFR.S                     |  |
|              | HsFLAG-TCF3_Ti_1     | 3.5157 | 0.2378 | 1316.78 | 1316.419 | 6306.6  | 3 | 1058.7                                                                           | 83.3 | 9  | R.FEELCSDFR.S                       |  |
|              | HsFLAG-ARP6_Ti_1     | 2.1699 | 0.1805 | 902.57  | 903.02   | 3454.5  | 4 | 265.1                                                                            | 64.3 | 2  | R.STLEPVEK.A                        |  |
|              | HsTIP60_Ti_105.226   | 2.8115 | 0.2224 | 1082.24 | 1082.244 | 4474.4  | 5 | 672.9                                                                            | 87.5 | 2  | K.LLQDFFNKG.E                       |  |
|              | HsFlag-NUFIP_Ti_11   | 4.3835 | 0.3141 | 2535.03 | 2532.81  | 10078.3 | 1 | 898.2                                                                            | 39.1 | 5  | R.GVPQIEVTFDIDANGILSVTATDR.S        |  |
| gij 31377603 | r                    | 5      | 15     | 15.20%  | 381      | 43563   |   | 9.8 HIV-1 rev binding protein 2 [Homo sapiens]                                   |      |    |                                     |  |
| *            | HsFlag-NUFIP_Ti_1    | 4.4459 | 0.2859 | 2552.59 | 2553.788 | 8342.3  | 1 | 1047.2                                                                           | 50   | 5  | R.NQKPKPENQDESELLTVPDGWK.E          |  |
| *            | HsFlag-NUFIP_Ti_1    | 4.5776 | 0.2758 | 2553.94 | 2553.788 | 8815.8  | 1 | 1510.7                                                                           | 36.9 | 2  | R.NQKPKPENQDESELLTVPDGWK.E          |  |
| *            | HsFlag-NUFIP_Ti_1    | 4.6369 | 0.4261 | 1538.75 | 1539.769 | 7997.1  | 1 | 1825.6                                                                           | 76.9 | 6  | R.GLLEESSFATLFPK.Y                  |  |
| *            | HsFlag-NUFIP_Ti_1    | 2.4208 | 0.1001 | 1111.54 | 1112.317 | 5047.6  | 8 | 524.4                                                                            | 75   | 1  | K.NIHPIYNIK.S                       |  |
| *            | HsFlag-NUFIP_Ti_1    | 3.7395 | 0.2091 | 1357.17 | 1357.634 | 8038.4  | 1 | 1787.7                                                                           | 83.3 | 1  | K.KLGALTAEEIALK.M                   |  |
| gij 10863889 | r                    | 7      | 13     | 15.10%  | 800      | 90255   |   | 6.1 squamous cell carcinoma antigen recognized by T cells 1 [Homo sapiens]       |      |    |                                     |  |
| *            | HsFlag-VPS71_Ti_1    | 3.9913 | 0.2494 | 1814.77 | 1814.907 | 6510.4  | 1 | 772.5                                                                            | 50   | 2  | K.EAAGTTAAAGTGGATEQPPR.H            |  |
| *            | HsFlag-VPS71_Ti_1    | 5.4884 | 0.4183 | 2104.99 | 2104.237 | 5911.7  | 1 | 1937.6                                                                           | 76.5 | 4  | K.TLGEDDPWLDDTAAWIER.S              |  |
| *            | HsFLAG-p53-DNA-D     | 4.1097 | 0.4359 | 1701.73 | 1701.877 | 9027.6  | 1 | 1662                                                                             | 67.9 | 2  | R.DLQGLTVEHAIDSFR.E                 |  |
| *            | HsFLAG-p53-DNA-D     | 2.7828 | 0.2665 | 2292.63 | 2293.498 | 11537.1 | 1 | 546.7                                                                            | 38.9 | 1  | R.SILSKYDEELEGEPHSFR.L              |  |
| *            | HsFlag-VPS71_Ti_1    | 2.8856 | 0.2975 | 2020.57 | 2021.105 | 4127.3  | 1 | 416.6                                                                            | 52.8 | 1  | R.ADDLLPLGDQTQDGFGRS.L              |  |
| *            | HsARP6-FLAG_Ti_1     | 4.4006 | 0.3439 | 1272.43 | 1272.497 | 7719.8  | 1 | 1641                                                                             | 81.8 | 2  | R.GLAAALLLCQNK.G                    |  |
| *            | HsFLAG-p53-DNA-D     | 4.7141 | 0.4894 | 1905.35 | 1906.202 | 6183.8  | 1 | 1370                                                                             | 67.6 | 1  | K.KMSSSDTPLGTVALLQEK.Q              |  |
| gij 5901928  | re                   | 6      | 53     | 15.10%  | 551      | 59209   |   | 7.4 cleavage and polyadenylation specific factor 6, 68 kD subunit [Homo sapiens] |      |    |                                     |  |
| *            | HsFlag-VPS71_Ti_1    | 2.5429 | 0.3915 | 1340.68 | 1341.506 | 8186.5  | 1 | 667.7                                                                            | 54.2 | 1  | K.GAAPNVVYTYTGK.R                   |  |
| *            | HsFLAG-Lin9_Ti_20%   | 4.3874 | 0.2815 | 1749.64 | 1749.933 | 8545    | 1 | 1086.4                                                                           | 60.7 | 4  | K.RELHGQNPVVTCPNK.Q                 |  |
| *            | HsFLAG-p53-DNA-D     | 4.6428 | 0.4379 | 1666.69 | 1666.843 | 8622    | 1 | 1797.2                                                                           | 76.9 | 1  | R.TPLSEAEFEEIMNR.N                  |  |
| *            | HsFLAG-p53-DNA-D     | 6.3787 | 0.5289 | 2451.93 | 2453.749 | 9126.1  | 1 | 2670.4                                                                           | 62.5 | 39 | R.AVSDASAGDYGSAIETLVTAISLIK.Q       |  |
| *            | HsFLAG-FLJ20729_1    | 4.7093 | 0.4179 | 2453.37 | 2453.749 | 7305.8  | 1 | 1539.4                                                                           | 37.5 | 2  | R.AVSDASAGDYGSAIETLVTAISLIK.Q       |  |
| *            | HsFLAG-p53-DNA-D     | 5.3452 | 0.4975 | 1799.32 | 1800.028 | 10404.7 | 1 | 2132                                                                             | 73.3 | 6  | K.VLISSLQDCLHGIESK.S                |  |
| gij 13540586 | r                    | 4      | 5      | 15.10%  | 518      | 57341   |   | 5.2 hypothetical protein LOC81556 [Homo sapiens]                                 |      |    |                                     |  |
|              | HsFlag-FLJ90652_2%   | 3.6699 | 0.38   | 2331.27 | 2331.637 | 7702.2  | 1 | 468.3                                                                            | 37.5 | 1  | R.LIDLNNGEGQIFTIDGPLCLK.N           |  |
|              | HsFlag-FLJ90652_2%   | 3.3922 | 0.3903 | 2243.97 | 2244.672 | 6122.7  | 1 | 603.6                                                                            | 47.4 | 1  | K.SNLMMSLFEPGPEPLPWLGK.M            |  |
|              | HsFlag-FLJ90652_2%   | 3.4517 | 0.3109 | 1279.42 | 1279.565 | 5055.7  | 1 | 1059.6                                                                           | 81.8 | 2  | K.AALAFGFLDLLK.G                    |  |



|               |                    |        |        |         |          |         |                                                                                    |        |      |                                         |
|---------------|--------------------|--------|--------|---------|----------|---------|------------------------------------------------------------------------------------|--------|------|-----------------------------------------|
|               | HsFlag-FLJ90652_20 | 2.7376 | 0.4166 | 2791.47 | 2792.087 | 6210.9  | 1                                                                                  | 278.6  | 33.3 | 1 R.ECTLLPETAHDPDAAFQLTHAAQQLK.L        |
| gi 5729730 re | 4                  | 21     | 15.10% | 504     | 56770    | 5.9     | apoptosis inhibitor 5 [Homo sapiens]                                               |        |      |                                         |
| *             | HsFLAG-p53-DNA-D   | 4.7445 | 0.3917 | 1744.82 | 1744.902 | 8600.9  | 1                                                                                  | 1550   | 70   | 3 R.NYGILADATEQVQGQHK.D                 |
| *             | HsFlag-VPS71_Ti_10 | 3.4126 | 0.1403 | 1472.27 | 1472.641 | 4666    | 4                                                                                  | 576.7  | 62.5 | 3 K.ELPQFATGENLPR.V                     |
| *             | HsFLAG-Lin9_Ti_20  | 3.8216 | 0.2932 | 3206.84 | 3207.648 | 10985.6 | 1                                                                                  | 929.1  | 25   | 4 R.VADILTQLLQTDSDAEFNLVNNALLSIFK.M     |
| *             | HsFLAG-p53-DNA-D   | 5.3073 | 0.3912 | 1904.38 | 1904.174 | 8968.1  | 1                                                                                  | 2199.4 | 70.6 | 11 K.GTLGGLFSQILQGEDIVR.E               |
| gi 29568103 r | 5                  | 8      | 15.10% | 437     | 51557    | 9.9     | U1 small nuclear ribonucleoprotein 70 kDa isoform a [Homo sapiens]                 |        |      |                                         |
|               | HsFLAG-p53-DNA-D   | 2.8374 | 0.231  | 1886.67 | 1887.229 | 4667.4  | 1                                                                                  | 378.4  | 53.3 | 1 R.DPIPYLPPLEKLPHEK.H                  |
|               | HsFlag-NUFIP_Ti_20 | 2.771  | 0.1414 | 1726.58 | 1726.901 | 6906.4  | 5                                                                                  | 434.4  | 53.8 | 1 K.HHNQPYCGIAPYIR.E                    |
|               | HsFlag-VPS71_Ti_10 | 1.9489 | 0.2275 | 1081.78 | 1082.241 | 2420.7  | 2                                                                                  | 204.9  | 68.8 | 1 R.EFEVYGPPIK.R                        |
| *             | HsFLAG-p53-DNA-D   | 3.3583 | 0.2381 | 958.41  | 958.065  | 5306    | 1                                                                                  | 995.9  | 93.8 | 4 R.RGGADVNIH.H                         |
| *             | HsFLAG-p53-DNA-D   | 4.022  | 0.3501 | 1660.3  | 1660.654 | 9792.2  | 1                                                                                  | 855    | 50   | 1 R.GGGGGQDNGLEGLGNSR.D                 |
| gi 5730027 re | 10                 | 53     | 15.10% | 443     | 48227    | 8.7     | KH domain containing, RNA binding, signal transduction associated 1 [Homo sapiens] |        |      |                                         |
| *             | HsFLAG-FLJ20309_   | 3.9825 | 0.3305 | 1385.08 | 1385.494 | 4742.2  | 1                                                                                  | 735.2  | 69.2 | 15 R.SGSMDPSGAHPSVR.Q                   |
|               | HsFlag-VPS71_Ti_10 | 2.1849 | 0.0959 | 1093.71 | 1094.311 | 3855.9  | 5                                                                                  | 409    | 62.5 | 2 K.YLPELMAEK.D                         |
| *             | HsFLAG-p53-DNA-D   | 4.1746 | 0.2053 | 3321.79 | 3322.813 | 7073.4  | 1                                                                                  | 705    | 27.7 | 2 K.YLPELMAEKDSLDPSTHAMQLLTAEIK.I       |
| *             | HsFLAG-FLJ20729_   | 3.9239 | 0.3297 | 2247.55 | 2247.525 | 4854    | 1                                                                                  | 552.1  | 35.5 | 6 K.DSLDPSFTHAMQLLTAEIK.I               |
| *             | HsFLAG-FLJ20729_   | 5.5552 | 0.4788 | 2248.36 | 2247.525 | 5634    | 1                                                                                  | 1006.1 | 60.5 | 16 K.DSLDPSFTHAMQLLTAEIK.I              |
| *             | HsFLAG-ARP5_Ti_10  | 4.3077 | 0.252  | 1753.15 | 1753.863 | 9463.5  | 1                                                                                  | 1868.8 | 76.9 | 7 K.KDDEENYLDLFSHK.N                    |
| *             | HsFLAG-Lin9_Ti_20  | 3.992  | 0.1469 | 1753.91 | 1753.863 | 6532.3  | 8                                                                                  | 1109.4 | 50   | 1 K.KDDEENYLDLFSHK.N                    |
| *             | HsFLAG-FLJ20729_   | 3.9398 | 0.2629 | 1626.14 | 1625.689 | 8757.2  | 1                                                                                  | 835.5  | 62.5 | 1 K.DDEENYLDLFSHK.N                     |
| *             | HsFLAG-p53-DNA-D   | 2.2212 | 0.1215 | 1040.6  | 1041.236 | 5803.5  | 1                                                                                  | 449.8  | 66.7 | 1 K.ILGPQGNTIK.R                        |
| *             | HsFLAG-p53-DNA-D   | 2.9817 | 0.2319 | 1041.32 | 1041.236 | 3815.7  | 2                                                                                  | 577    | 83.3 | 2 K.ILGPQGNTIK.R                        |
| gi 56118234 r | 2                  | 4      | 15.10% | 272     | 29731    | 9.7     | proline rich 6 [Homo sapiens]                                                      |        |      |                                         |
| *             | HsFLAG-ARP6_Ti_10  | 4.6485 | 0.3817 | 1926.3  | 1927.128 | 5390.1  | 1                                                                                  | 878.7  | 59.5 | 2 K.RSGASAAPAASAAAALAPSATR.T            |
| *             | HsFLAG-ARP6_Ti_10  | 4.5998 | 0.4725 | 1984.34 | 1985.13  | 5742.4  | 1                                                                                  | 1412.6 | 69.4 | 2 R.SNPGGFGIAPHCLDEGTVR.S               |
| gi 13775200 r | 1                  | 4      | 15.10% | 86      | 10135    | 6.4     | SF3b10 [Homo sapiens]                                                              |        |      |                                         |
| *             | HsFLAG-Lin9_Ti_20  | 4.2003 | 0.3297 | 1584.35 | 1584.772 | 10659.8 | 1                                                                                  | 1835.4 | 75   | 4 R.YTIHSQLEHLQSK.Y                     |
| gi 51599156 r | 15                 | 43     | 15.00% | 1912    | 218003   | 5.9     | chromodomain helicase DNA binding protein 4 [Homo sapiens]                         |        |      |                                         |
| *             | HsFLAG-p53-DNA-D   | 3.8052 | 0.2455 | 1448.86 | 1448.751 | 8337.7  | 1                                                                                  | 1274   | 70.8 | 2 K.AFSQFVRPLIAAK.N                     |
| *             | HsSrcap_Ti_205.215 | 3.0713 | 0.1063 | 1426.59 | 1426.574 | 6400.5  | 1                                                                                  | 1079.5 | 80   | 2 K.WREFSTNNPFK.G                       |
| *             | HsSrcap_Ti_206.354 | 6.9596 | 0.4306 | 3756.55 | 3757.337 | 8784.6  | 1                                                                                  | 1959.6 | 29.5 | 4 .A                                    |
| *             | HsSrcap_Ti_204.332 | 5.6905 | 0.4002 | 4267.6  | 4266.541 | 8491.3  | 1                                                                                  | 909.5  | 23.6 | 1 K.DGGELLCCDTCPSYHIHCLNPLPEIPNGEWLCP.R |
|               | HsFlag-VPS71_Ti_10 | 2.7171 | 0.3393 | 2040.89 | 2041.283 | 6293.3  | 1                                                                                  | 574.1  | 44.4 | 1 R.FSWAQGTDTILADEMGLGK.T               |
|               | HsSrcap_Ti_203.417 | 4.7188 | 0.4454 | 1902.17 | 1901.216 | 4477.5  | 1                                                                                  | 929.1  | 68.8 | 14 K.GPFLVSAPLSTIINWER.E                |
|               | HsFLAG-Lin9_Ti_20  | 4.5874 | 0.4438 | 3037.87 | 3037.529 | 4231.5  | 1                                                                                  | 517.6  | 30   | 2 K.LLLTGTPLQNNLEELFHLLNFLTPER.F        |
| *             | HsSrcap_Ti_205.264 | 4.441  | 0.3476 | 2007.19 | 2006.259 | 6637.9  | 1                                                                                  | 1232.5 | 65.6 | 3 K.CCNHPYLFPVAAMEAPK.M                 |
|               | HsSrcap_Ti_204.333 | 5.2483 | 0.5175 | 1857.91 | 1858.073 | 4627.8  | 1                                                                                  | 861.4  | 73.3 | 3 R.FNAPGAQQFCFLSTR.A                   |
|               | HsFLAG-ARP5_Ti_10  | 2.8267 | 0.2021 | 1554.29 | 1554.619 | 6562.7  | 3                                                                                  | 601.9  | 68.2 | 1 R.HHYEQQEDLAR.N                       |
| *             | HsSrcap_Ti_201.079 | 4.0155 | 0.4212 | 2303.52 | 2304.392 | 7021.5  | 1                                                                                  | 603.4  | 42.9 | 2 K.STAPETAIECTQAPAPASEDEK.V            |
| *             | HsFlag-VPS71_Ti_10 | 3.0932 | 0.1956 | 1176.44 | 1175.281 | 8517.5  | 4                                                                                  | 1040.8 | 70   | 1 K.GAADVEKVEEK.S                       |
|               | HsSrcap_Ti_203.304 | 3.709  | 0.2644 | 1554.79 | 1554.827 | 7815.9  | 1                                                                                  | 1364.1 | 75   | 1 K.LLEQALVIEEQLR.R                     |
| *             | HsSrcap_Ti_204.178 | 4.1667 | 0.4912 | 1885.72 | 1886.037 | 9484    | 1                                                                                  | 1726.8 | 66.7 | 1 R.FAEVECLAESHQHLK.E                   |

|             |                    |        |        |         |          |        |   |        |      |   |                                                             |
|-------------|--------------------|--------|--------|---------|----------|--------|---|--------|------|---|-------------------------------------------------------------|
| *           | HsSrcap_Ti_203.152 | 4.6379 | 0.4045 | 1876.74 | 1877.067 | 7857.4 | 1 | 1357.2 | 62.5 | 5 | R.LANRAPEPTPQQVAQQQ.-                                       |
| gi 56550051 | r                  | 5      | 9      | 14.90%  | 565      | 65381  |   |        |      |   | 8.9 ubiquitin specific protease 39 [Homo sapiens]           |
| *           | HsFLAG-p53-DNA-D   | 2.5052 | 0.2244 | 1908.98 | 1910.177 | 4474.7 | 3 | 326.9  | 41.2 | 1 | R.AYDGTTYLPGIVGLNNIK.A                                      |
| *           | HsFLAG-p53-DNA-D   | 4.7522 | 0.4446 | 2026.53 | 2027.288 | 5238.3 | 1 | 1121.3 | 66.7 | 5 | K.ANDYANAVLQALSINVPLR.N                                     |
| *           | HsARP6-FLAG_Ti_1   | 2.827  | 0.2489 | 1264.61 | 1264.56  | 4275   | 1 | 450.1  | 72.2 | 1 | K.LPPYLIFCIK.R                                              |
| *           | HsFLAG-p53-DNA-D   | 2.7646 | 0.2025 | 1713.44 | 1713.974 | 6898.6 | 1 | 488.8  | 53.6 | 1 | K.NPTIVNFPITNVDLR.E                                         |
| *           | HsFLAG-p53-DNA-D   | 3.6734 | 0.2491 | 2451.5  | 2451.655 | 7438.1 | 7 | 621.3  | 28.6 | 1 | K.NTTYDLIANIVHDGKPSEGSYR.I                                  |
| gi 4885661  | re                 | 4      | 7      | 14.90%  | 543      | 60801  |   |        |      |   | 6.7 viral oncogene yes-1 homolog 1 [Homo sapiens]           |
| *           | HsFLAG-ARP6_Ti_1   | 5.8741 | 0.4418 | 3520.71 | 3521.742 | 6495.6 | 1 | 811.9  | 27.3 | 1 | K.YRPENTPEPVSTSVSHYGAEPSTVSPCPSSSAK.G                       |
| *           | HsFLAG-ARP6_Ti_1   | 5.2404 | 0.4049 | 1881.24 | 1880.026 | 8078.2 | 1 | 1752.3 | 78.6 | 1 | R.FQIINTEGDWWEAR.S                                          |
| *           | HsFLAG-ARP6_Ti_1   | 3.5571 | 0.4259 | 1842.4  | 1843.14  | 4747.5 | 1 | 330.4  | 46.9 | 2 | K.LTTVCPTVKPQTQLAK.D                                        |
| *           | HsFLAG-ARP6_Ti_1   | 3.7758 | 0.3305 | 1823.12 | 1824.084 | 9176.6 | 1 | 1194.8 | 60   | 3 | K.SDVWSFGILQTELVTK.G                                        |
| gi 7705738  | re                 | 3      | 10     | 14.90%  | 242      | 28162  |   |        |      |   | 10 mitochondrial ribosomal protein S7 [Homo sapiens]        |
| *           | HsFlag-NUFIP_Ti_11 | 3.7302 | 0.2934 | 1332.58 | 1332.545 | 8340.4 | 1 | 1037.6 | 75   | 4 | R.NPYTIFHQALK.N                                             |
| *           | HsFlag-NUFIP_Ti_10 | 2.8154 | 0.2006 | 1488.51 | 1487.745 | 8291.4 | 1 | 798    | 63.6 | 2 | R.FYQVPVPLPDRR.R                                            |
| *           | HsFlag-NUFIP_Ti_10 | 3.9701 | 0.2867 | 1466.58 | 1466.723 | 9529.7 | 1 | 1161.2 | 70.8 | 4 | K.LLEAFHNQGPVIK.R                                           |
| gi 23397666 | r                  | 9      | 21     | 14.80%  | 1273     | 145175 |   |        |      |   | 7.3 transcriptional co-repressor Sin3A [Homo sapiens]       |
| *           | HsFlag-VPS71_Ti_10 | 3.4829 | 0.3983 | 2143.77 | 2144.45  | 3362.3 | 1 | 369.5  | 50   | 1 | K.LQFGSQPVYNDFLDIMK.E                                       |
| *           | HsFLAG-p53-DNA-D   | 3.7178 | 0.3865 | 2005.9  | 2005.342 | 8002.7 | 1 | 1358.8 | 61.8 | 1 | K.GHPDLIMGFNTFLPPGYK.I                                      |
| *           | HsFLAG-Lin9_Ti_20  | 3.9669 | 0.2655 | 4010.74 | 4011.486 | 8269.6 | 2 | 395.7  | 18.1 | 1 | R.SPPVQPHPTVTISLGTAPSLQNNQPVEFNHAINVYVK.I                   |
| *           | HsFlag-VPS71_Ti_10 | 4.4328 | 0.2569 | 1363.42 | 1363.599 | 7383.3 | 1 | 1620.5 | 85   | 5 | K.AFLEILHTYQK.E                                             |
| *           | HsScrap_Ti_102.244 | 4.2557 | 0.4367 | 2267.55 | 2268.445 | 3474.9 | 1 | 425.8  | 47.5 | 2 | K.EAGGNYTPALTEQEVYAQVAR.L                                   |
| *           | HsSrcap_Ti_202.452 | 5.277  | 0.4478 | 2652.66 | 2652.918 | 5957   | 1 | 872.1  | 47.8 | 6 | K.NQEDLLSEFGQLPDANSSVLLSK.T                                 |
| *           | HsScrap_Ti_103.239 | 3.0176 | 0.3206 | 1150.49 | 1151.435 | 5481.4 | 1 | 630.5  | 70   | 2 | K.NPSIAVPIVLK.R                                             |
| *           | HsSrcap_Ti_203.367 | 4.9783 | 0.345  | 4147.15 | 4146.468 | 5056.5 | 1 | 606    | 25   | 2 | K.SLLNEIESIYDERQEATEENAGVPVGPVPHLSLAYEDK.Q                  |
| *           | HsFLAG-p53-DNA-D   | 3.6746 | 0.1567 | 1434.93 | 1435.712 | 6369   | 1 | 955.1  | 72.7 | 1 | R.EHLAQKPVFLPR.N                                            |
| gi 17017991 | r                  | 6      | 19     | 14.80%  | 847      | 96576  |   |        |      |   | 8.2 FtsJ homolog 3 [Homo sapiens]                           |
| *           | HsFlag-NUFIP_Ti_11 | 5.6862 | 0.5012 | 3621.27 | 3622.298 | 6291.8 | 1 | 1057.4 | 29.7 | 1 | K.FMPVSSLIVGVDLVPIKPLPNVTLQEDITTER.C                        |
| *           | HsFlag-NUFIP_Ti_11 | 4.6933 | 0.4872 | 1867.7  | 1868.188 | 7262   | 1 | 1853.4 | 76.9 | 4 | R.DYQPLLWIFQQLFR.R                                          |
| *           | HsFLAG-TCF3_Ti_10  | 3.8404 | 0.3205 | 2839.94 | 2840.029 | 8862   | 1 | 797.8  | 38   | 1 | K.GSFAGIEDDADEALEISQAQLLFENR.R                              |
| *           | HsFLAG-ARP6_Ti_1   | 2.7454 | 0.2257 | 1747.22 | 1747.853 | 4567.9 | 1 | 549.7  | 50   | 3 | K.SDDDGFEIVPIEDPAK.H                                        |
| *           | HsFLAG-p53-DNA-D   | 4.8675 | 0.4607 | 1654.7  | 1654.944 | 7319.3 | 1 | 2085.6 | 78.1 | 5 | R.ILDPEGLALGAVIASSK.K                                       |
| *           | HsFLAG-TCF3_Ti_10  | 4.7098 | 0.4273 | 2389.71 | 2390.521 | 6430.6 | 1 | 723.2  | 52.8 | 5 | R.YTFNEDEGELPEWVQEEK.Q                                      |
| gi 4507241  | re                 | 6      | 9      | 14.80%  | 709      | 81075  |   |        |      |   | 6.9 structure specific recognition protein 1 [Homo sapiens] |
| *           | HsFLAG-p53-DNA-D   | 2.6385 | 0.2097 | 951.07  | 951.16   | 5577.4 | 1 | 1142.2 | 93.8 | 1 | R.RVALGHGLK.L                                               |
| *           | HsFLAG-Lin9_Ti_20  | 4.8964 | 0.258  | 3257.2  | 3256.603 | 6459.8 | 1 | 624.6  | 26.7 | 1 | K.FGGQLLSFDIGDQPVFEIPLSNVSCQTTGK.N                          |
| *           | HsFLAG-p53-DNA-D   | 3.0086 | 0.4045 | 2652.04 | 2651.932 | 3545   | 1 | 249.9  | 39.1 | 1 | R.FYVPPTQEDGVDPVEAFAQNVLSK.A                                |
| *           | HsFLAG-FLJ20729_   | 2.7188 | 0.3142 | 1325.84 | 1326.584 | 4322.1 | 1 | 450.4  | 75   | 3 | R.IYPTFLHLHGK.T                                             |
| *           | HsFLAG-p53-DNA-D   | 2.8064 | 0.2371 | 1267.31 | 1267.517 | 4667.8 | 2 | 844.6  | 83.3 | 2 | R.LFLLPHKDQR.Q                                              |
| *           | HsFLAG-Lin9_Ti_20  | 3.791  | 0.3094 | 2325.55 | 2326.503 | 5388.5 | 1 | 346    | 40   | 1 | K.ITVPGNFQGHSGAQICITCSYK.A                                  |
| gi 40217805 | r                  | 5      | 11     | 14.80%  | 702      | 79277  |   |        |      |   | 9.2 hypothetical protein LOC79707 [Homo sapiens]            |
| *           | HsFLAG-Lin9_Ti_20  | 4.0732 | 0.0958 | 3820.9  | 3820.334 | 4093.5 | 1 | 365.7  | 22   | 1 | K.TATVNFITSYPGSSYIFVQESPTPQIKPEYLALR.S                      |
| *           | HsH2AZ-FLAG_293_   | 3.8209 | 0.2938 | 1386.36 | 1385.516 | 6514.8 | 1 | 1369.7 | 90   | 2 | K.NNYENYIDIVK.Y                                             |

|               |                    |        |        |         |          |                                                                          |   |        |      |    |                                       |
|---------------|--------------------|--------|--------|---------|----------|--------------------------------------------------------------------------|---|--------|------|----|---------------------------------------|
| *             | HsH2AZ-FLAG_293_   | 4.2173 | 0.2522 | 2752.61 | 2752.994 | 6278.2                                                                   | 9 | 449.8  | 26   | 1  | R.LAAFADALEFADEEKESPVFTGHK.L          |
| *             | HsH2AZ-FLAG_293_   | 3.181  | 0.2536 | 1978.11 | 1979.346 | 7009.3                                                                   | 2 | 461.2  | 41.2 | 5  | R.TVNCLLVGAIAIPHCVLK.C                |
| *             | HsH2AZ-FLAG_293_   | 3.7285 | 0.3326 | 1804.28 | 1804.994 | 3020.7                                                                   | 1 | 652.4  | 76.7 | 2  | R.GIEGTVPYVTTDYNFK.L                  |
| gi 58535459 r | 5                  | 10     | 14.80% | 418     | 48758    | 8.6 cell division cycle 10 isoform 1 [Homo sapiens]                      |   |        |      |    |                                       |
| gi 58535461 r | 5                  | 10     | 14.90% | 417     | 48659    | 8.6 cell division cycle 10 isoform 2 [Homo sapiens]                      |   |        |      |    |                                       |
|               | HsFLAG-p53-DNA-D   | 2.5067 | 0.298  | 1954.13 | 1955.18  | 8925.3                                                                   | 1 | 490.8  | 43.8 | 1  | K.NLEGYVGFANLPNQVYR.K                 |
|               | HsFLAG-p53-DNA-D   | 4.1606 | 0.4343 | 2608    | 2608.91  | 8137                                                                     | 1 | 546.7  | 36.4 | 4  | K.STLINSFLTDLYSPEYGPGRSHR.I           |
|               | HsFlag-VPS71_Ti_1( | 4.3148 | 0.18   | 2611.12 | 2608.91  | 6126.2                                                                   | 1 | 730.9  | 29.5 | 3  | K.STLINSFLTDLYSPEYGPGRSHR.I           |
|               | HsFlag-VPS71_Ti_1( | 3.8122 | 0.3835 | 1524.12 | 1524.59  | 4946.9                                                                   | 1 | 931.2  | 77.3 | 1  | K.DVTNNVHYENYR.S                      |
|               | HsFLAG-p53-DNA-D   | 3.0314 | 0.2095 | 1189.24 | 1189.311 | 6819.8                                                                   | 1 | 893.1  | 83.3 | 1  | K.LKDSEAEQR.R                         |
| gi 89036402 r | 5                  | 189    | 14.80% | 229     | 25758    | 7.5 PREDICTED: similar to ubiquitin C isoform 5 [Homo sapiens]           |   |        |      |    |                                       |
| gi 89036412 r | 5                  | 126    | 12.80% | 266     | 29892    | 6.9 PREDICTED: similar to ubiquitin C isoform 10 [Homo sapiens]          |   |        |      |    |                                       |
| gi 89036410 r | 5                  | 189    | 14.80% | 229     | 25758    | 7.5 PREDICTED: similar to ubiquitin C isoform 9 [Homo sapiens]           |   |        |      |    |                                       |
| gi 89036408 r | 5                  | 315    | 8.90%  | 381     | 42851    | 7.6 PREDICTED: similar to CG11624-PA, isoform A isoform 8 [Homo sapiens] |   |        |      |    |                                       |
| gi 89036406 r | 5                  | 189    | 14.80% | 229     | 25758    | 7.5 PREDICTED: similar to ubiquitin C isoform 7 [Homo sapiens]           |   |        |      |    |                                       |
| gi 89036404 r | 5                  | 315    | 8.90%  | 381     | 42851    | 7.6 PREDICTED: similar to CG11624-PA, isoform A isoform 6 [Homo sapiens] |   |        |      |    |                                       |
|               | HsH2AZ-FLAG_293_   | 4.2324 | 0.2617 | 1788.49 | 1788.99  | 4419.2                                                                   | 1 | 862.9  | 70   | 78 | K.TITLEVEPSDTIENVK.A                  |
|               | HsFlag-VPS71_Ti_1( | 2.5095 | 0.1457 | 1081.52 | 1082.199 | 7176.1                                                                   | 4 | 468.2  | 68.8 | 3  | R.TLSDYNIQK.E                         |
|               | HsFlag-VPS71_Ti_1( | 2.5377 | 0.1147 | 1082.36 | 1082.199 | 2680.1                                                                   | 3 | 487.2  | 87.5 | 3  | R.TLSDYNIQK.E                         |
|               | HsFlag-VPS71_Ti_1( | 2.164  | 0.1434 | 1067.63 | 1068.261 | 3540.1                                                                   | 1 | 262.4  | 62.5 | 12 | K.ESTLHLVLR.L                         |
|               | HsFLAG-TCF3_Ti_1(  | 3.1021 | 0.3261 | 1068.54 | 1068.261 | 4839.9                                                                   | 3 | 563.2  | 81.2 | 93 | K.ESTLHLVLR.L                         |
| gi 19424130 r | 15                 | 27     | 14.70% | 1445    | 161719   | 5.8 CD109 [Homo sapiens]                                                 |   |        |      |    |                                       |
| *             | HsFLAG-ARP6_Ti_1(  | 3.7669 | 0.3034 | 2145.64 | 2146.445 | 3570.3                                                                   | 1 | 748.4  | 63.9 | 3  | K.TLTPLSLPLNSADEIYELR.V               |
| *             | HsFLAG-ARP6_Ti_1(  | 3.1576 | 0.1016 | 1207.21 | 1207.415 | 7500.2                                                                   | 4 | 963.4  | 77.8 | 1  | K.RISVFIQTDK.A                        |
| *             | HsFLAG-ARP6_Ti_1(  | 6.2851 | 0.4162 | 2145.82 | 2145.42  | 7882.4                                                                   | 1 | 1734.6 | 66.7 | 2  | K.SNLIQQWLSQQSDLGVISK.T               |
| *             | HsFLAG-ARP6_Ti_1(  | 2.8502 | 0.2285 | 1761.55 | 1762.01  | 6074.8                                                                   | 1 | 1209   | 71.4 | 1  | K.IEFPILDSSELQLK.A                    |
| *             | HsFLAG-ARP6_Ti_1(  | 3.0799 | 0.3637 | 1107.5  | 1107.313 | 5725.4                                                                   | 1 | 1233.3 | 88.9 | 1  | K.SSMVHSLFK.S                         |
| *             | HsFLAG-ARP6_Ti_1(  | 3.8226 | 0.319  | 1333.26 | 1333.527 | 7780.5                                                                   | 1 | 1686.4 | 83.3 | 1  | K.VGSPFELVVSGNK.R                     |
| *             | HsFLAG-ARP6_Ti_1(  | 4.5351 | 0.4141 | 2315.99 | 2315.589 | 10816.1                                                                  | 1 | 1499.7 | 55.3 | 6  | K.ACIVVYIEDDGEIISDVLK.I               |
| *             | HsFLAG-ARP6_Ti_1(  | 3.4567 | 0.3364 | 1743.14 | 1742.023 | 2821.6                                                                   | 1 | 345.6  | 50   | 1  | R.ISVTQPDSIVGIVAVDK.S                 |
| *             | HsFLAG-ARP6_Ti_1(  | 3.5511 | 0.3261 | 1794.17 | 1793.841 | 5234.2                                                                   | 1 | 1098   | 75   | 2  | K.DYIDGVYDNAEYER.F                    |
| *             | HsFLAG-ARP6_Ti_1(  | 3.4683 | 0.3088 | 1625.47 | 1625.776 | 7329                                                                     | 1 | 1200.1 | 69.2 | 2  | K.SYSQSILLDLTDNR.L                    |
| *             | HsFLAG-ARP6_Ti_1(  | 3.3914 | 0.2026 | 2208.47 | 2208.607 | 6053.3                                                                   | 1 | 468.8  | 38.1 | 2  | R.VQITAIGDVLGSPSINGLASLIR.M           |
| *             | HsFLAG-ARP6_Ti_1(  | 5.2067 | 0.4109 | 2209.52 | 2208.607 | 8400.1                                                                   | 1 | 1165   | 36.9 | 2  | R.VQITAIGDVLGSPSINGLASLIR.M           |
| *             | HsFLAG-ARP6_Ti_1(  | 3.8867 | 0.4616 | 1856.09 | 1855.185 | 8164.2                                                                   | 1 | 1264.8 | 65.6 | 1  | K.SPVTLTAYIVTSLLLGYR.K                |
| *             | HsFLAG-ARP6_Ti_1(  | 2.7072 | 0.2326 | 1982.09 | 1983.359 | 10646.5                                                                  | 3 | 453.2  | 35.3 | 1  | K.SPVTLTAYIVTSLLLGYR.K.Y              |
| *             | HsFLAG-ARP6_Ti_1(  | 2.7182 | 0.1988 | 2438.52 | 2439.643 | 7654.6                                                                   | 1 | 382.4  | 36.8 | 1  | K.YQPNIDVQESIHFLESEFSR.G              |
| gi 21327701 r | 5                  | 23     | 14.70% | 592     | 61830    | 8 TBP-associated factor 15 isoform 1 [Homo sapiens]                      |   |        |      |    |                                       |
| gi 4507353 re | 5                  | 23     | 14.80% | 589     | 61558    | 8 TBP-associated factor 15 isoform 2 [Homo sapiens]                      |   |        |      |    |                                       |
|               | HsFLAG-Lin9_Ti_20' | 5.3149 | 0.3497 | 3626.54 | 3624.72  | 9408.9                                                                   | 1 | 1256.5 | 27.3 | 7  | R.TDADSESDNSDNTIFVQGLGEGVSTDQVGEFFK.Q |
|               | HsFLAG-FLJ20309_   | 2.8393 | 0.2065 | 1381.81 | 1381.63  | 3911.7                                                                   | 1 | 431.3  | 68.2 | 1  | K.TGKPMINLYTDK.D                      |
|               | HsFlag-VPS71_Ti_1( | 4.1712 | 0.4305 | 1421.9  | 1421.503 | 4776.8                                                                   | 1 | 1058.8 | 76.9 | 3  | K.GEATVSFDDPPSAK.A                    |
|               | HsFlag-VPS71_Ti_1( | 2.5337 | 0.1023 | 1022.72 | 1023.133 | 6069                                                                     | 2 | 567.1  | 68.8 | 1  | K.AAIDWFDGK.E                         |

|               |                     |        |        |         |          |         |   |        |      |    |                                                                     |
|---------------|---------------------|--------|--------|---------|----------|---------|---|--------|------|----|---------------------------------------------------------------------|
| gi 4506623 re | HsFLAG-ARP6_Ti_2    | 4.5086 | 0.3845 | 2070.38 | 2070.176 | 4415.9  | 1 | 803.2  | 61.8 | 11 | K.SGDWVCPNPSCGNMNFAR.R                                              |
| *             | HsFLAG-TCF3_Ti_10   | 3.7499 | 0.2921 | 1408.76 | 1408.618 | 8324.4  | 1 | 1722.8 | 85   | 4  | K.VYNYNHLMPTR.Y                                                     |
| *             | HsFLAG-TCF3_Ti_10   | 2.1916 | 0.2589 | 1049.56 | 1050.197 | 4703.9  | 3 | 418.6  | 68.8 | 2  | R.YSVDIPLDK.T                                                       |
| gi 32189392 r |                     | 2      | 4      | 14.60%  | 198      | 21892   |   |        |      |    | 6 peroxiredoxin 2 isoform a [Homo sapiens]                          |
| gi 33188452 r |                     | 2      | 4      | 19.70%  | 147      | 15989   |   |        |      |    | 6.6 peroxiredoxin 2 isoform b [Homo sapiens]                        |
|               | HsFLAG-p53-DNA-D    | 5.194  | 0.5205 | 1863.47 | 1864.195 | 6725.6  | 1 | 1609.2 | 70.6 | 3  | R.KEGGLGPLNIPLLDVTR.R                                               |
|               | HsFLAG-KIAA0515_    | 2.9532 | 0.1804 | 1212.33 | 1212.392 | 5537    | 2 | 805.4  | 80   | 1  | R.QITVNDLPVGR.S                                                     |
| gi 22208973 r |                     | 1      | 2      | 14.60%  | 96       | 10679   |   |        |      |    | 10.3 high mobility group AT-hook 1 isoform b [Homo sapiens]         |
| gi 4504433 re |                     | 1      | 2      | 14.60%  | 96       | 10679   |   |        |      |    | 10.3 high mobility group AT-hook 1 isoform b [Homo sapiens]         |
| gi 22208979 r |                     | 1      | 2      | 14.60%  | 96       | 10679   |   |        |      |    | 10.3 high mobility group AT-hook 1 isoform b [Homo sapiens]         |
| gi 22208975 r |                     | 1      | 2      | 14.60%  | 96       | 10679   |   |        |      |    | 10.3 high mobility group AT-hook 1 isoform b [Homo sapiens]         |
|               | HsFLAG-p53-DNA-D    | 3.2926 | 0.3    | 1562.52 | 1562.806 | 4407.9  | 3 | 336.2  | 57.7 | 2  | R.KQPPKEPSEVPTPK.R                                                  |
| gi 28557709 r |                     | 3      | 9      | 14.50%  | 318      | 34839   |   |        |      |    | 6.4 phosphoribosyl pyrophosphate synthetase 1-like 1 [Homo sapiens] |
| gi 4506127 re |                     | 3      | 9      | 14.50%  | 318      | 34834   |   |        |      |    | 7 phosphoribosyl pyrophosphate synthetase 1 [Homo sapiens]          |
|               | HsFlag-FLJ90652_2   | 3.6906 | 0.2358 | 1434.09 | 1434.549 | 8568.7  | 1 | 1399.4 | 75   | 4  | K.IFSGSSHQDLSQK.I                                                   |
|               | HsFlag-FLJ90652_2   | 5.1766 | 0.4416 | 1802.79 | 1803.114 | 7236.7  | 1 | 2295.9 | 84.4 | 4  | R.VYAILTHGIFSGPAISR.I                                               |
|               | HsFLAG-TCF3_Ti_10   | 2.7646 | 0.2012 | 1788.05 | 1787.97  | 6945.4  | 1 | 540.5  | 53.3 | 1  | R.THNGESVSYLFSHVPL.-                                                |
| gi 7661806 re |                     | 3      | 5      | 14.50%  | 296      | 33420   |   |        |      |    | 10 mitochondrial ribosomal protein L15 [Homo sapiens]               |
| *             | HsFLAG-ARP6_Ti_1    | 3.4736 | 0.2291 | 1325.26 | 1325.551 | 5534.9  | 1 | 1077.8 | 75   | 1  | R.VSLANLKPNGSK.K                                                    |
| *             | HsFLAG-ARP6_Ti_10   | 4.8399 | 0.5058 | 1843.23 | 1843.985 | 7276.7  | 1 | 2089.7 | 75   | 3  | R.DYGVQLVEEGADTFTAK.V                                               |
| *             | HsFLAG-ARP6_Ti_10   | 2.7354 | 0.1185 | 1398.08 | 1397.53  | 8234.7  | 1 | 949.5  | 62.5 | 1  | K.NGGVVTTAFYDPR.S                                                   |
| gi 16117791 r |                     | 3      | 8      | 14.50%  | 110      | 12538   |   |        |      |    | 11.1 ribosomal protein L35a [Homo sapiens]                          |
|               | HsFLAG-TCF3_Ti_10   | 1.9154 | 0.1016 | 769.47  | 769.919  | 6868.4  | 4 | 538.9  | 75   | 3  | K.AIFAGYK.R                                                         |
| *             | HsFlag-les6_293_Ti_ | 1.8472 | 0.1999 | 1101.17 | 1102.186 | 6286    | 5 | 400    | 62.5 | 1  | R.DETEFYLGK.R                                                       |
| *             | HsFLAG-ARP6_Ti_10   | 2.7693 | 0.2309 | 1101.91 | 1102.186 | 4690.4  | 5 | 593.9  | 75   | 4  | R.DETEFYLGK.R                                                       |
| gi 14249398 r |                     | 1      | 2      | 14.50%  | 110      | 12405   |   |        |      |    | 8.4 PHD-finger 5A [Homo sapiens]                                    |
| *             | HsFLAG-Lin9_Ti_20   | 4.5782 | 0.4155 | 1806.3  | 1806.908 | 7904.4  | 1 | 1504.5 | 70   | 2  | R.CVICGGPGVSDAYYCK.E                                                |
| gi 7661606 re |                     | 5      | 8      | 14.40%  | 749      | 84878   |   |        |      |    | 5.5 nucleolar complex associated 2 homolog [Homo sapiens]           |
| *             | HsFLAG-ARP6_Ti_10   | 3.6071 | 0.2465 | 2839.26 | 2839.355 | 11375.2 | 1 | 784.5  | 25   | 1  | R.VLSTAGPSEALQPLVYPLAQVIIGCIK.L                                     |
| *             | HsFLAG-Lin9_Ti_20   | 6.2328 | 0.4135 | 4152.05 | 4152.786 | 8206    | 1 | 1568.4 | 28.6 | 1  | R.DGLVEQLYDLTLEYLHSAHCIGFPELVLPVVLQLK.S                             |
| *             | HsFLAG-p53-DNA-D    | 3.3471 | 0.3625 | 1752.61 | 1752.924 | 8302    | 1 | 562.8  | 50   | 1  | R.EEGPLTLTYSHWR.K                                                   |
| *             | HsFLAG-ARP6_Ti_10   | 3.782  | 0.2241 | 1503.89 | 1503.695 | 6623.5  | 1 | 1206.9 | 77.3 | 2  | K.ERLEDLNFPEIK.R                                                    |
| *             | HsFLAG-ARP6_Ti_10   | 4.8222 | 0.4815 | 2205.34 | 2206.194 | 10282.9 | 1 | 2548   | 66.7 | 3  | K.DLFDLNSSEEDDTEGFSEK.G                                             |
| gi 14141193 r |                     | 4      | 10     | 14.40%  | 194      | 22591   |   |        |      |    | 10.7 ribosomal protein S9 [Homo sapiens]                            |
| *             | HsFLAG-ARP6_Ti_10   | 4.205  | 0.198  | 1189.13 | 1189.403 | 6969.7  | 1 | 1239.2 | 83.3 | 7  | R.RLFEGNALLR.R                                                      |
| *             | HsFLAG-ARP6_Ti_10   | 3.0027 | 0.237  | 1034.05 | 1033.216 | 3129.2  | 8 | 602    | 87.5 | 1  | R.LFEGNALLR.R                                                       |
| *             | HsFLAG-ARP6_Ti_10   | 2.541  | 0.1    | 1022.16 | 1020.22  | 4135.8  | 1 | 700.2  | 92.9 | 1  | R.RLQTQVFK.L                                                        |
| *             | HsFlag-NUFIP_Ti_11  | 2.6881 | 0.2129 | 1004.52 | 1004.093 | 7052.2  | 2 | 713.9  | 72.2 | 1  | R.SPYGGGRPR.V                                                       |
| gi 16554609 r |                     | 2      | 6      | 14.40%  | 194      | 20616   |   |        |      |    | 10.8 mitochondrial ribosomal protein S11 isoform a [Homo sapiens]   |
| *             | HsFlag-NUFIP_Ti_10  | 3.4975 | 0.2181 | 1324.71 | 1325.594 | 6059.6  | 1 | 1107   | 85   | 4  | K.KFEEIPIAHK.A                                                      |
|               | HsFLAG-ARP6_Ti_10   | 3.531  | 0.2873 | 1530.54 | 1528.752 | 7999.2  | 1 | 1108.8 | 59.4 | 2  | K.KGTGIAAQTAGIAAAAR.A                                               |
| gi 27436904 r |                     | 1      | 3      | 14.40%  | 153      | 17811   |   |        |      |    | 9.7 mitochondrial ribosomal protein L23 [Homo sapiens]              |

|               |                    |        |        |         |          |         |   |        |      |    |                                                                           |
|---------------|--------------------|--------|--------|---------|----------|---------|---|--------|------|----|---------------------------------------------------------------------------|
| *             | HsFlag-NUFIP_Ti_1C | 4.1051 | 0.2683 | 2563.46 | 2563.919 | 8407.7  | 1 | 1276.3 | 33.3 | 3  | R.TNFFIQLVRPGVAQPEDTVQFR.I                                                |
| gi 4757880 re |                    | 2      | 5      | 14.30%  | 328      | 37155   |   |        |      |    | 6.8 BUB3 budding uninhibited by benzimidazoles 3 isoform a [Homo sapiens] |
| gi 56550081 r |                    | 2      | 5      | 14.40%  | 326      | 36955   |   |        |      |    | 6.8 BUB3 budding uninhibited by benzimidazoles 3 isoform b [Homo sapiens] |
|               | HsFLAG-p53-DNA-D   | 3.5054 | 0.2597 | 2172.02 | 2172.402 | 9851.7  | 1 | 646.1  | 41.7 | 2  | K.FSPNTSQFLLVSSWDTSVR.L                                                   |
|               | HsFLAG-Lin9_Ti_20  | 3.7197 | 0.1877 | 3189.72 | 3189.436 | 11202.4 | 1 | 790.7  | 25   | 3  | K.YQHTGAVLDCAFYDPHAWSGGLDHLK.M                                            |
| gi 4502281 re |                    | 3      | 4      | 14.30%  | 279      | 31513   |   |        |      |    | 8.3 Na+/K+ -ATPase beta 3 subunit [Homo sapiens]                          |
| *             | HsFLAG-ARP6_Ti_1   | 3.9637 | 0.3186 | 1628.72 | 1628.868 | 4807.4  | 1 | 754.9  | 69.2 | 2  | K.LFIYNPTTGEFLGR.T                                                        |
|               | HsFLAG-ARP6_Ti_1   | 2.8561 | 0.3412 | 1687.33 | 1687.844 | 5405.5  | 1 | 835.1  | 64.3 | 1  | R.SDPTSAGYIEDLKK.F                                                        |
|               | HsFLAG-ARP6_Ti_1   | 3.0223 | 0.2277 | 1179.13 | 1179.448 | 4700    | 2 | 963.5  | 85   | 1  | R.IIGLKPEGVPR.I                                                           |
| gi 15011916 r |                    | 2      | 2      | 14.30%  | 217      | 22348   |   |        |      |    | 10.9 nucleolar protein family A, member 1 [Homo sapiens]                  |
| gi 9506713 re |                    | 2      | 2      | 14.30%  | 217      | 22348   |   |        |      |    | 10.9 nucleolar protein family A, member 1 [Homo sapiens]                  |
|               | HsFLAG-FLJ20309_   | 2.5062 | 0.279  | 2143.83 | 2144.405 | 8978.4  | 4 | 363    | 38.2 | 1  | R.VVLLGEFLHPCEDDIVCK.C                                                    |
|               | HsFLAG-ARP6_Ti_1   | 3.8491 | 0.3009 | 1554.37 | 1554.786 | 7344.9  | 1 | 1763.6 | 83.3 | 1  | K.VPYFNAPVYLENK.E                                                         |
| gi 4507349 re |                    | 8      | 16     | 14.20%  | 1083     | 109944  |   |        |      |    | 9.9 TBP-associated factor 4 [Homo sapiens]                                |
| *             | HsFLAG-FLJ20729_   | 3.3736 | 0.2655 | 1354.35 | 1354.508 | 4998.6  | 1 | 877.6  | 68.8 | 2  | R.AGPGPGPGPGPGPGPK.P                                                      |
| *             | HsFLAG-FLJ20729_   | 4.6118 | 0.4534 | 1843.44 | 1844.035 | 5920.6  | 1 | 1018   | 68.8 | 4  | K.QVSAQTTVQPSATLQR.S                                                      |
| *             | HsFLAG-p53-DNA-D   | 3.72   | 0.3317 | 3064.33 | 3064.426 | 6800.7  | 1 | 494.4  | 23.4 | 1  | R.SPGVQPQLVLGGAAQTASLGTATAVQTGTPQR.T                                      |
| *             | HsFLAG-FLJ20729_   | 4.4    | 0.2899 | 2178.08 | 2178.404 | 10115.2 | 1 | 1358.2 | 37.5 | 1  | K.ELVQNLLDGKIEAEDFTSR.L                                                   |
| *             | HsFLAG-FLJ20729_   | 5.1723 | 0.395  | 1287.24 | 1287.459 | 8331.6  | 1 | 2359.1 | 84.6 | 4  | K.ALSAVSAQAAAAQK.N                                                        |
| *             | HsFLAG-Lin9_Ti_20  | 4.005  | 0.3725 | 1488.49 | 1488.725 | 6972    | 1 | 933.1  | 65.4 | 2  | R.ILATNSELVGTLTR.S                                                        |
| *             | HsFLAG-FLJ20729_   | 3.528  | 0.1138 | 1297.11 | 1297.45  | 7204.4  | 1 | 1558.8 | 88.9 | 1  | K.FFEQLDQIEK.Q                                                            |
| *             | HsFLAG-FLJ20729_   | 5.5294 | 0.3613 | 2867.42 | 2867.071 | 5736.8  | 1 | 1693.6 | 38.3 | 1  | K.RKVDCPGPGSGAEGSGPGSVVPGSSGVGTPR.Q                                       |
| gi 55749531 r |                    | 11     | 30     | 14.20%  | 895      | 100228  |   |        |      |    | 5.7 splicing factor 3B subunit 2 [Homo sapiens]                           |
| *             | HsFLAG-ARP6_Ti_2   | 2.8738 | 0.2865 | 1316.33 | 1315.423 | 6815.9  | 1 | 998.5  | 72.7 | 1  | R.VGEPVALSEEER.L                                                          |
| *             | HsFLAG-ARP6_Ti_2   | 4.6233 | 0.408  | 1758.6  | 1758.003 | 9987.1  | 1 | 1902.7 | 75   | 4  | K.LAQQAALLMQQEER.A                                                        |
| *             | HsFlag-NUFIP_Ti_2C | 3.8007 | 0.1741 | 1185.36 | 1185.369 | 7740.7  | 1 | 1198.9 | 83.3 | 5  | K.RAAVLLEQER.Q                                                            |
| *             | HsFLAG-Lin9_Ti_20  | 4.1721 | 0.4733 | 1941.67 | 1941.998 | 8229.8  | 1 | 1184.3 | 55.6 | 2  | R.SSLGQSASETEEDTVSVSK.K                                                   |
| *             | HsFlag-VPS71_Ti_1C | 4.4464 | 0.2812 | 1788.13 | 1787.112 | 8310.4  | 1 | 1235.8 | 67.9 | 4  | K.RGIEKPPFELPDFIKR.R                                                      |
| *             | HsFlag-NUFIP_Ti_11 | 2.7431 | 0.24   | 1788.24 | 1787.112 | 4717.8  | 1 | 314.4  | 50   | 1  | R.GIEKPPFELPDFIKR.T                                                       |
| *             | HsFlag-NUFIP_Ti_2C | 3.2977 | 0.1825 | 1130.14 | 1130.243 | 8801.9  | 1 | 1375.7 | 83.3 | 2  | K.KPGDLSDELRI                                                             |
| *             | HsFLAG-BC014022_   | 3.4398 | 0.3089 | 1321.05 | 1321.58  | 3752.1  | 1 | 486.6  | 70.8 | 4  | R.ISLGMPVGPNAHK.V                                                         |
| *             | HsFlag-NUFIP_Ti_1C | 2.5583 | 0.2254 | 1308.84 | 1308.627 | 3903.8  | 1 | 456.2  | 80   | 2  | K.VPPPWLAMQR.Y                                                            |
| *             | HsFLAG-FLJ20729_   | 3.9288 | 0.2705 | 2363.24 | 2363.685 | 8725.3  | 1 | 1103.9 | 36.2 | 1  | K.KIEEAMDGSETPQLFTVLPEK.R                                                 |
| *             | HsFlag-VPS71_Ti_1C | 5.504  | 0.3967 | 2364.12 | 2363.685 | 7015.8  | 1 | 2481.8 | 72.5 | 4  | K.KIEEAMDGSETPQLFTVLPEK.R                                                 |
| gi 14249678 r |                    | 4      | 13     | 14.20%  | 401      | 44962   |   |        |      |    | 6 RNA binding motif protein 17 [Homo sapiens]                             |
| *             | HsFlag-NUFIP_Ti_1C | 3.224  | 0.2096 | 1446.38 | 1446.69  | 5687.8  | 1 | 905.9  | 73.1 | 4  | R.QIVDTPPHVAAGLK.D                                                        |
| *             | HsFlag-VPS71_Ti_1C | 2.5755 | 0.2068 | 1146.64 | 1146.208 | 6346.8  | 3 | 737.8  | 77.8 | 1  | K.DRHEASGFAR.R                                                            |
| *             | HsFlag-NUFIP_Ti_11 | 4.099  | 0.1991 | 1685.57 | 1685.979 | 5622.7  | 2 | 1039.2 | 68.8 | 7  | K.RSMGGAIAAPPTSLVEK.D                                                     |
| *             | HsFlag-DPCD_Ti_20  | 4.0758 | 0.3198 | 1788.61 | 1788.961 | 3939.6  | 1 | 584.1  | 63.3 | 1  | K.CVIFEIPGAPDDEAVR.I                                                      |
| gi 5032069 re |                    | 3      | 22     | 14.20%  | 424      | 44386   |   |        |      |    | 8.6 splicing factor 3b, subunit 4 [Homo sapiens]                          |
| *             | HsFlag-VPS71_Ti_1C | 5.1939 | 0.3795 | 2607.66 | 2607.086 | 5614.2  | 1 | 1291.4 | 38.6 | 2  | K.VSEPLLWELFLQAGPVVNTHPK.D                                                |
| *             | HsFLAG-FLJ20729_   | 4.5297 | 0.3847 | 2186.94 | 2187.411 | 7692.2  | 1 | 1507.6 | 60.5 | 7  | K.NLDVGANIFIGNLDPEIDEK.L                                                  |
| *             | HsFLAG-p53-DNA-D   | 5.0847 | 0.4063 | 1913.71 | 1914.252 | 9495.7  | 1 | 1845.9 | 65.6 | 13 | K.LLYDTFSAFGVILQTPK.I                                                     |

|               |                    |        |        |         |          |                                                                                                        |   |        |      |                                          |
|---------------|--------------------|--------|--------|---------|----------|--------------------------------------------------------------------------------------------------------|---|--------|------|------------------------------------------|
| gij16950603 r | 2                  | 4      | 14.20% | 323     | 36844    | 8.2 mitochondrial ribosomal protein S35 [Homo sapiens]                                                 |   |        |      |                                          |
| *             | HsFlag-NUFIP_Ti_11 | 5.3148 | 0.4066 | 2938.41 | 2939.445 | 4192.7                                                                                                 | 1 | 588.7  | 30.8 | 3 K.MAVDQDWPSVYPVAAPFKPSAVPLPVR.M        |
| *             | HsFlag-NUFIP_Ti_10 | 3.5622 | 0.3956 | 2105.96 | 2107.284 | 6358                                                                                                   | 1 | 494    | 47.2 | 1 K.HFPIEIDSTDYVSSGSPVR.N                |
| gij89044285 r | 16                 | 36     | 14.10% | 1949    | 220240   | 7.7 PREDICTED: structural maintenance of chromosomes flexible hinge domain containing 1 [Homo sapiens] |   |        |      |                                          |
| gij89047296 r | 16                 | 36     | 14.10% | 1949    | 220240   | 7.7 PREDICTED: similar to SMC hinge domain containing 1 [Homo sapiens]                                 |   |        |      |                                          |
|               | HsFLAG-Lin9_Ti_20  | 4.7629 | 0.3821 | 2190.58 | 2191.573 | 8722.7                                                                                                 | 1 | 1207.8 | 52.6 | 6 K.DGVTLYLLQSVNQLLLTATK.E               |
|               | HsFLAG-Lin9_Ti_20  | 3.3712 | 0.3025 | 1747.19 | 1747.004 | 8879.7                                                                                                 | 1 | 671.6  | 57.7 | 2 K.ERIDFLPHYDTLVK.S                     |
|               | HsFLAG-FLJ20729_   | 4.0016 | 0.3685 | 3496.11 | 3496.827 | 10868.1                                                                                                | 1 | 845.2  | 25   | 1 K.SGMYEYYASEGQNPLPFALAEIDNLSATS.R.N    |
|               | HsFLAG-p53-DNA-D   | 4.5229 | 0.3546 | 2044.48 | 2044.315 | 5060.3                                                                                                 | 1 | 814.5  | 55.6 | 1 K.LLFDQEQGKPAVAVIDNGR.G                |
|               | HsARP6-FLAG_Ti_1   | 3.1224 | 0.2352 | 1444.44 | 1444.584 | 7878.2                                                                                                 | 5 | 596.7  | 57.7 | 2 R.SLNSDISYFGVGGK.Q                     |
|               | HsARP6-FLAG_Ti_1   | 2.9451 | 0.3973 | 1266.26 | 1266.526 | 3327.3                                                                                                 | 1 | 602.9  | 80   | 2 K.TLPLFYGSIVR.F                        |
|               | HsFLAG-p53-DNA-D   | 3.8069 | 0.2597 | 1311.71 | 1312.554 | 6971.6                                                                                                 | 1 | 1462.1 | 85   | 6 K.FSFGLLDLPFR.V                        |
|               | HsFLAG-p53-DNA-D   | 3.3661 | 0.1727 | 1541.75 | 1541.828 | 5235.6                                                                                                 | 1 | 530.5  | 61.5 | 2 K.VTLPGLKEDSILK.I                      |
|               | HsFLAG-Lin9_Ti_20  | 5.5994 | 0.3375 | 3746.69 | 3745.175 | 11210.7                                                                                                | 1 | 1302.2 | 25   | 1 K.VKPDSEILVIENGTAFPFQVEVLDESNDITAQPK.L |
|               | HsFLAG-Lin9_Ti_20  | 3.6004 | 0.1751 | 2829.51 | 2829.151 | 6481.8                                                                                                 | 1 | 633.1  | 29.3 | 1 R.DLQNPPIVQLCDQWDNPAPVQHV.K.I          |
|               | HsARP6-FLAG_Ti_1   | 3.8043 | 0.3203 | 1278.41 | 1278.497 | 6749.9                                                                                                 | 1 | 961.8  | 72.7 | 3 R.ANLGVFSVFAPR.G                       |
|               | HsFLAG-p53-DNA-D   | 2.2562 | 0.1178 | 911.56  | 912.034  | 4038.8                                                                                                 | 2 | 399.7  | 71.4 | 1 R.GEHTLQVK.A                           |
|               | HsFlag-DPCD_Ti_20  | 4.7208 | 0.3916 | 2051.01 | 2052.174 | 10507.8                                                                                                | 1 | 1049   | 50   | 4 K.LSTSGNRPPANAETFSCNK.I                |
|               | HsARP6-FLAG_Ti_1   | 2.8796 | 0.1477 | 1503.19 | 1503.651 | 10191.8                                                                                                | 1 | 1067   | 63.6 | 1 R.DSTEYFIVFEPR.L                       |
|               | HsFLAG-FLJ20729_   | 2.9639 | 0.2347 | 1989.77 | 1991.352 | 6577.3                                                                                                 | 4 | 512.3  | 50   | 1 R.TLEPYILPFMFYNDVK.K                   |
|               | HsARP6-FLAG_Ti_1   | 3.5718 | 0.2278 | 1639.17 | 1638.876 | 8814.1                                                                                                 | 1 | 1591.3 | 69.2 | 2 K.SLFEASQQLLNEMK.C                     |
| gij4506193 re | 2                  | 2      | 14.10% | 241     | 26489    | 8.1 proteasome beta 1 subunit [Homo sapiens]                                                           |   |        |      |                                          |
| *             | HsFlag-VPS71_Ti_10 | 3.9884 | 0.3143 | 2005.61 | 2005.296 | 4091.6                                                                                                 | 1 | 509.6  | 50   | 1 K.AGGSASAMLQPLLDNQVGFK.N               |
| *             | HsFlag-VPS71_Ti_10 | 3.5398 | 0.3399 | 1652.61 | 1652.866 | 5342.9                                                                                                 | 3 | 556.4  | 57.7 | 1 K.NMQNVEHVPLSLDR.A                     |
| gij4827071 re | 3                  | 4      | 14.10% | 177     | 19463    | 7.7 zinc finger protein 9 [Homo sapiens]                                                               |   |        |      |                                          |
| *             | HsMRGBP-FLAG_Ti_1  | 3.1711 | 0.3782 | 1486.43 | 1486.556 | 5730.3                                                                                                 | 1 | 871.7  | 72.7 | 1 K.CYSCGEFGHIQK.D                       |
| *             | HsFlag-VPS71_Ti_10 | 4.1862 | 0.4355 | 1433.29 | 1433.493 | 7649.4                                                                                                 | 1 | 1512.1 | 75   | 2 R.CGETHVAINCSK.T                       |
| *             | HsFlag-VPS71_Ti_10 | 2.542  | 0.0885 | 1434.46 | 1433.493 | 3224.9                                                                                                 | 1 | 313.2  | 62.5 | 1 R.CGETHVAINCSK.T                       |
| gij22202629 r | 5                  | 11     | 14.00% | 609     | 66295    | 8.9 programmed cell death 8 isoform 2 [Homo sapiens]                                                   |   |        |      |                                          |
| gij4757732 re | 5                  | 11     | 13.90% | 613     | 66901    | 9 programmed cell death 8 isoform 1 [Homo sapiens]                                                     |   |        |      |                                          |
|               | HsYL1_Ti_101.1586. | 3.6678 | 0.3074 | 1531.7  | 1531.616 | 4767.7                                                                                                 | 1 | 829.1  | 67.9 | 3 K.AALSASEGEEVPQDK.A                    |
|               | HsFLAG-ARP6_Ti_1   | 3.8461 | 0.3318 | 2026.87 | 2025.361 | 4535.6                                                                                                 | 1 | 679.6  | 52.5 | 1 K.APSHVPFLIGGGTAAFAAAR.S               |
|               | HsFLAG-ARP6_Ti_1   | 3.7574 | 0.3757 | 1992.07 | 1993.277 | 10767.7                                                                                                | 1 | 1164.6 | 52.6 | 3 K.SITIIGGGFLGSELACALGR.K               |
|               | HsFLAG-ARP6_Ti_1   | 3.4649 | 0.1792 | 1445.68 | 1445.699 | 6349.8                                                                                                 | 1 | 1178.9 | 75   | 2 R.ALGTEVIQLFPEK.G                      |
|               | HsFLAG-ARP6_Ti_1   | 4.2223 | 0.4904 | 1573.51 | 1573.848 | 3591                                                                                                   | 1 | 719.3  | 70   | 2 K.VMPNAIVQSVGVSSGK.L                   |
| gij20070125 r | 5                  | 12     | 14.00% | 508     | 57116    | 4.9 prolyl 4-hydroxylase, beta subunit [Homo sapiens]                                                  |   |        |      |                                          |
| *             | HsFLAG-Lin9_Ti_20  | 4.8872 | 0.3452 | 2937.35 | 2937.273 | 8311.1                                                                                                 | 1 | 1580   | 31.9 | 6 R.TGPAATLTPDGAAAESLVESSEVAVIGFFK.D     |
| *             | HsFLAG-p53-DNA-D   | 3.9054 | 0.2971 | 1965.58 | 1966.244 | 6118.4                                                                                                 | 1 | 461.8  | 46.9 | 3 K.HNQLPLVIEFTEQTAPK.I                  |
| *             | HsFLAG-p53-DNA-D   | 4.7819 | 0.2705 | 1966.39 | 1966.244 | 6162.4                                                                                                 | 1 | 1118.8 | 42.2 | 1 K.HNQLPLVIEFTEQTAPK.I                  |
| *             | HsFLAG-BC014022_   | 2.7465 | 0.1518 | 1081.95 | 1082.374 | 4933.9                                                                                                 | 1 | 942.1  | 81.2 | 1 K.THILLFLPK.S                          |
| *             | HsFlag-VPS71_Ti_10 | 3.6736 | 0.2682 | 1835.95 | 1835.026 | 7873.2                                                                                                 | 1 | 1021.3 | 60.7 | 1 K.ILFIFIDSHTDNQR.I                     |
| gij19913432 r | 2                  | 3      | 14.00% | 351     | 40329    | 5 ATPase, H+ transporting, lysosomal, V0 subunit D isoform 1 [Homo sapiens]                            |   |        |      |                                          |
| *             | HsFLAG-ARP6_Ti_1   | 5.104  | 0.4975 | 2479.54 | 2480.741 | 9060.4                                                                                                 | 1 | 1652.6 | 54.8 | 1 K.AGVLSQADYLNLVQCETLEDLK.L             |

|               |                    |        |        |         |          |        |                                                                                                             |        |      |                                    |
|---------------|--------------------|--------|--------|---------|----------|--------|-------------------------------------------------------------------------------------------------------------|--------|------|------------------------------------|
| *             | HsFLAG-ARP6_Ti_1   | 5.0435 | 0.4094 | 2975.5  | 2977.257 | 8105.8 | 1                                                                                                           | 795.5  | 29.8 | 2 K.LHLQSTDYGNFLANEASPLTVSVIDDR.L  |
| gi 4506619 re | 3                  | 13     | 14.00% | 157     | 17779    | 11.3   | ribosomal protein L24 [Homo sapiens]                                                                        |        |      |                                    |
| *             | HsFLAG-TCF3_Ti_1   | 2.8606 | 0.126  | 1193.59 | 1193.391 | 4808.5 | 1                                                                                                           | 584.5  | 87.5 | 2 R.QINWTVLYR.R                    |
| *             | HsYL1_Ti_102.2003. | 3.4261 | 0.3289 | 1261.63 | 1262.507 | 9858.5 | 3                                                                                                           | 813.8  | 58.3 | 5 R.AITGASLADIMAK.R                |
| *             | HsFLAG-ARP6_Ti_1   | 4.3862 | 0.362  | 1263.45 | 1262.507 | 7589.3 | 1                                                                                                           | 2066   | 87.5 | 6 R.AITGASLADIMAK.R                |
| gi 33469968 r | 6                  | 13     | 13.90% | 719     | 81308    | 6.5    | minichromosome maintenance protein 7 isoform 1 [Homo sapiens]                                               |        |      |                                    |
| *             | HsFLAG-p53-DNA-D   | 2.8816 | 0.2971 | 1635.6  | 1635.901 | 7067.7 | 1                                                                                                           | 776.3  | 61.5 | 1 K.LFADAVQELLPOKYK.E              |
|               | HsFlag-VPS71_Ti_1  | 4.2939 | 0.467  | 2034.39 | 2034.409 | 7484.1 | 1                                                                                                           | 1482.1 | 61.1 | 3 R.IAQPGDHVSVTGIFLPILR.T          |
|               | HsFLAG-TCF3_Ti_1   | 2.6046 | 0.1236 | 1553.37 | 1551.87  | 7035.3 | 1                                                                                                           | 592.5  | 53.6 | 1 K.ALLLLLVGVDQSPR.G               |
|               | HsFLAG-p53-DNA-D   | 3.9488 | 0.3654 | 1590.36 | 1590.785 | 6462.5 | 1                                                                                                           | 1447.4 | 79.2 | 2 R.LAQHITYVHQHSR.Q                |
|               | HsFlag-VPS71_Ti_1  | 3.4384 | 0.2839 | 1475.76 | 1474.703 | 6085.5 | 1                                                                                                           | 814.1  | 66.7 | 5 R.TQRPADVIFATVR.E                |
|               | HsSrcap_Ti_203.428 | 3.5219 | 0.4177 | 2986.92 | 2985.239 | 8074.5 | 1                                                                                                           | 648.5  | 36   | 1 R.GFTPAQFQAALDEYEELNVWQVNASR.T   |
| gi 5453994 re | 6                  | 14     | 13.90% | 631     | 71690    | 4.7    | RAD21 homolog [Homo sapiens]                                                                                |        |      |                                    |
| *             | HsARP6-FLAG_Ti_1   | 2.9608 | 0.194  | 1141.31 | 1140.33  | 4801.3 | 3                                                                                                           | 873.2  | 87.5 | 1 K.IWLAAHWDK.K                    |
| *             | HsFlag-VPS71_Ti_1  | 3.6304 | 0.3959 | 2147.78 | 2147.356 | 6714.1 | 1                                                                                                           | 518.3  | 52.8 | 1 K.AHVFEKNLESSVESIISPK.V          |
| *             | HsARP6-FLAG_Ti_1   | 3.495  | 0.1284 | 1458.06 | 1457.632 | 6555   | 1                                                                                                           | 1434.3 | 86.4 | 1 K.YLLADCNEAFIK.I                 |
| *             | HsFLAG-p53-DNA-D   | 3.2491 | 0.1851 | 1730.12 | 1730.979 | 5111.1 | 2                                                                                                           | 865.8  | 60.7 | 3 K.MAFRPGVVDLPEENR.E              |
| *             | HsFLAG-ARP6_Ti_2   | 4.8318 | 0.3119 | 2148.44 | 2149.403 | 6600.7 | 1                                                                                                           | 1301.2 | 57.9 | 3 R.AQLSDYSDIVTTLDLAPPTK.K         |
| *             | HsFlag-VPS71_Ti_1  | 3.4153 | 0.1762 | 1557.79 | 1556.808 | 4076.2 | 1                                                                                                           | 801.6  | 79.2 | 5 K.LFSLPAQPLWNNR.L                |
| gi 20270371 r | 2                  | 4      | 13.90% | 245     | 28048    | 7.2    | hypothetical protein LOC134147 [Homo sapiens]                                                               |        |      |                                    |
| *             | HsFLAG-RPB5MP_2    | 3.6158 | 0.2275 | 1970.46 | 1971.31  | 5222.1 | 1                                                                                                           | 778.1  | 56.2 | 2 K.AVIVIQDIFGWQLPNTR.Y            |
| *             | HsFLAG-RPB5MP_2    | 4.2714 | 0.3228 | 1929.45 | 1931.282 | 6129.1 | 1                                                                                                           | 987.8  | 59.4 | 2 K.NPTLFIFAENDVVIPLK.D            |
| gi 40254978 r | 4                  | 11     | 13.80% | 594     | 66526    | 5.6    | FIP1-like 1 [Homo sapiens]                                                                                  |        |      |                                    |
| *             | HsFLAG-Lin9_Ti_20  | 4.2339 | 0.4654 | 1951.99 | 1952.174 | 6018.1 | 1                                                                                                           | 474.2  | 47.2 | 3 K.TGAPQYGSYGTA PVNLNIK.T         |
| *             | HsFlag-VPS71_Ti_1  | 3.6543 | 0.4653 | 1811.82 | 1811.135 | 4788.7 | 1                                                                                                           | 861.7  | 65.6 | 6 R.RLPGAIDVIGQTITISR.V            |
| *             | HsFLAG-p53-DNA-D   | 4.3964 | 0.3826 | 2843.18 | 2844.199 | 4540.5 | 1                                                                                                           | 792.8  | 34.6 | 1 R.AFPYGNVAFPHLPGSAPSWPSLVDTSK.Q  |
| *             | HsFlag-VPS71_Ti_1  | 2.8091 | 0.2709 | 1931.31 | 1930.931 | 6144   | 2                                                                                                           | 362    | 44.4 | 1 K.EAGSEPAPEQESTEATPAE.-          |
| gi 27545326 r | 3                  | 4      | 13.80% | 385     | 44141    | 6.2    | SWI/SNF related, matrix associated, actin dependent regulator of chromatin, subfamily b, member 1 isoform a |        |      |                                    |
| gi 55956801 r | 3                  | 4      | 14.10% | 376     | 43158    | 5.7    | SWI/SNF related, matrix associated, actin dependent regulator of chromatin, subfamily b, member 1 isoform b |        |      |                                    |
|               | HsARP6-FLAG_Ti_1   | 3.1243 | 0.2982 | 1548.26 | 1548.601 | 7771.4 | 1                                                                                                           | 846.7  | 61.5 | 1 K.ASEVEEILDGNDEK.Y               |
|               | HsFLAG-p53-DNA-D   | 3.4103 | 0.3483 | 1921.73 | 1922.188 | 6776.6 | 1                                                                                                           | 897.8  | 59.4 | 1 K.TYAFSENPLPTVEIAIR.N            |
|               | HsFLAG-p53-DNA-D   | 3.6227 | 0.2844 | 2539.61 | 2538.708 | 7624.6 | 1                                                                                                           | 498.2  | 38.1 | 2 R.NTGADQWCPLLETLTDAEMEK.K        |
| gi 33350932 r | 42                 | 124    | 13.70% | 4646    | 532412   | 6.4    | dynein, cytoplasmic, heavy polypeptide 1 [Homo sapiens]                                                     |        |      |                                    |
| *             | HsFLAG-p53-DNA-D   | 4.8392 | 0.2055 | 2477.32 | 2477.858 | 7986.8 | 1                                                                                                           | 1456.8 | 34.8 | 1 R.KLVPLLEDGGEAPAALAALEEK.S       |
| *             | HsFLAG-p53-DNA-D   | 6.1956 | 0.5032 | 2477.91 | 2477.858 | 7211.2 | 1                                                                                                           | 1725.4 | 58.7 | 2 R.KLVPLLEDGGEAPAALAALEEK.S       |
| *             | HsFlag-VPS71_Ti_1  | 5.98   | 0.4768 | 2349.13 | 2349.684 | 5858.7 | 1                                                                                                           | 1618.4 | 63.6 | 9 K.LVPLLEDGGEAPAALAALEEK.S        |
| *             | HsFlag-VPS71_Ti_1  | 5.8743 | 0.4095 | 2349.93 | 2349.684 | 7900.2 | 1                                                                                                           | 2049.7 | 42   | 10 K.LVPLLEDGGEAPAALAALEEK.S       |
| *             | HsFLAG-p53-DNA-D   | 3.9172 | 0.4392 | 1640.59 | 1640.88  | 6419.8 | 1                                                                                                           | 1278.6 | 76.9 | 4 K.FLSDPQVHTV LVER.S              |
| *             | HsFLAG-p53-DNA-D   | 4.1226 | 0.2288 | 2914.17 | 2914.284 | 7034.1 | 1                                                                                                           | 608.6  | 27   | 4 R.VLTLSEDSPTYETLH SFISNAVAPFFK.S |
| *             | HsFlag-VPS71_Ti_1  | 3.429  | 0.3841 | 2914.69 | 2914.284 | 8926.5 | 1                                                                                                           | 680.9  | 34   | 2 R.VLTLSEDSPTYETLH SFISNAVAPFFK.S |
| *             | HsFLAG-FLJ20729_   | 4.3532 | 0.335  | 1816.94 | 1817.996 | 8835   | 1                                                                                                           | 1037.4 | 56.7 | 2 K.VEDPTFLNQLQSGVNR.W             |
| *             | HsARP6-FLAG_Ti_1   | 3.023  | 0.3218 | 1692.23 | 1691.876 | 4260.8 | 1                                                                                                           | 517.4  | 64.3 | 1 K.DFPLNDLLSATELDK.I              |
| *             | HsFLAG-ARP6_Ti_1   | 3.411  | 0.2694 | 1375.17 | 1374.663 | 3458.5 | 2                                                                                                           | 702.6  | 81.8 | 2 K.VNFLPEIITLSK.E                 |

|               |                    |        |        |         |          |                                                             |   |        |      |                                          |
|---------------|--------------------|--------|--------|---------|----------|-------------------------------------------------------------|---|--------|------|------------------------------------------|
| *             | HsFLAG-ARP6_Ti_1   | 4.4457 | 0.3093 | 2159.26 | 2158.465 | 10315.4                                                     | 4 | 1023.2 | 34.7 | 2 K.AHQANQLYPFAISLIESVR.T                |
| *             | HsFLAG-ARP6_Ti_2   | 3.4182 | 0.128  | 1462.37 | 1459.642 | 7472.8                                                      | 1 | 1651.6 | 83.3 | 1 R.AWTQVLLGQAEDK.A                      |
| *             | HsFLAG-p53-DNA-D   | 3.6596 | 0.1792 | 2530.45 | 2529.896 | 7779.2                                                      | 1 | 495    | 38.6 | 2 K.TKPVTGNLRPEEALQALTIYEGK.F            |
| *             | HsFlag-VPS71_Ti_1( | 4.382  | 0.38   | 1961.25 | 1960.191 | 8313                                                        | 1 | 1419.3 | 62.5 | 8 R.FYFVGDEDLLEIGNSK.N                   |
| *             | HsARP6-FLAG_Ti_1(  | 2.8558 | 0.1634 | 1580.42 | 1580.737 | 5911.8                                                      | 1 | 710.2  | 66.7 | 1 K.FNYGFEYLGVDK.L                       |
| *             | HsFLAG-ARP6_Ti_1(  | 2.7048 | 0.2264 | 1690.3  | 1690.894 | 7643.5                                                      | 2 | 478.1  | 41.2 | 1 R.LGGSPFGPAGTGKTESVK.A                 |
| *             | HsFLAG-ARP6_Ti_1(  | 4.2429 | 0.3506 | 1962.82 | 1962.238 | 9057.5                                                      | 1 | 1429.8 | 59.4 | 1 R.MLSAVSQVQCIQEALR.E                   |
| *             | HsFLAG-p53-DNA-D   | 4.1418 | 0.3839 | 1801.57 | 1801.997 | 4611.1                                                      | 1 | 779.2  | 63.3 | 2 K.AISKDHLYGTLDPNTR.E                   |
| *             | HsFLAG-p53-DNA-D   | 2.9145 | 0.278  | 1474.99 | 1474.659 | 7165.8                                                      | 1 | 618.4  | 63.6 | 1 R.EWTDGLFTHVLR.K                       |
| *             | HsFLAG-p53-DNA-D   | 4.7099 | 0.3353 | 1924.91 | 1925.213 | 10018.9                                                     | 1 | 1662.6 | 63.3 | 2 K.ALEHAFQLEHIMDLTR.L                   |
| *             | HsARP6-FLAG_Ti_1(  | 3.0491 | 0.2639 | 1552.53 | 1552.811 | 6248.9                                                      | 1 | 700.8  | 57.1 | 1 K.VAAPDVVPTLDTVR.H                     |
| *             | HsFlag-VPS71_Ti_1( | 5.4016 | 0.4642 | 2448.24 | 2446.862 | 8597                                                        | 1 | 1924.9 | 56.8 | 9 R.ALPMDEVVGLNFSSATTPELLLK.T            |
| *             | HsFlag-VPS71_Ti_1( | 2.6604 | 0.3272 | 2339.57 | 2339.64  | 8922.8                                                      | 1 | 705.4  | 44.7 | 1 R.TYAEPLTAAMVEFYTMSQER.F               |
| *             | HsFLAG-p53-DNA-D   | 4.9853 | 0.4186 | 1753.62 | 1753.911 | 4715.9                                                      | 1 | 1064.6 | 76.9 | 3 R.FTQDTQPHYIYSR.E                      |
| *             | HsFlag-VPS71_Ti_1( | 3.617  | 0.2814 | 2123.92 | 2124.531 | 5691.5                                                      | 1 | 847.5  | 52.8 | 7 R.GIFEALRPLETLPVEGLIR.I                |
| *             | HsFlag-VPS71_Ti_1( | 3.6049 | 0.1695 | 2125.05 | 2124.531 | 4090.4                                                      | 1 | 1218.8 | 50   | 1 R.GIFEALRPLETLPVEGLIR.I                |
| *             | HsFlag-VPS71_Ti_1( | 4.3667 | 0.4185 | 2789.49 | 2789.2   | 3642.4                                                      | 1 | 450.9  | 45.5 | 1 K.VFYEEELDVPVLFNEVDLHVLR.I             |
| *             | HsFlag-VPS71_Ti_1( | 4.6268 | 0.3369 | 2789.53 | 2789.2   | 6066.5                                                      | 2 | 887.6  | 31.8 | 3 K.VFYEEELDVPVLFNEVDLHVLR.I             |
| *             | HsFLAG-ARP6_Ti_1(  | 3.7456 | 0.4084 | 1774.2  | 1774.045 | 6601.1                                                      | 1 | 745.7  | 53.3 | 2 R.NLHVFTMNPSSEGLK.D                    |
| *             | HsFLAG-p53-DNA-D   | 5.2047 | 0.3916 | 2062.42 | 2062.294 | 10806.3                                                     | 1 | 2368.2 | 70   | 1 R.HYLDFINHYANLFHEK.R                   |
| *             | HsFLAG-p53-DNA-D   | 4.1367 | 0.399  | 2267.75 | 2266.513 | 5503                                                        | 1 | 676.8  | 52.6 | 2 R.ENFIPTIVNFSAEIISDAIR.E               |
| *             | HsFlag-VPS71_Ti_1( | 2.7636 | 0.2347 | 2264.44 | 2264.521 | 3337.2                                                      | 8 | 181.5  | 39.5 | 1 R.WQASSLPADDLCTENAIMLK.R               |
| *             | HsFlag-VPS71_Ti_1( | 5.1705 | 0.3061 | 2330.76 | 2330.658 | 3514.7                                                      | 1 | 832.1  | 65.8 | 3 R.YPLIIDPSGQATEFIMNEYK.D               |
| *             | HsFlag-VPS71_Ti_1( | 5.5741 | 0.4447 | 2599.11 | 2599.946 | 8198.2                                                      | 1 | 997.9  | 45.5 | 13 R.FGNPLLVDVESYDPLNPNVLR.E             |
| *             | HsFLAG-ARP6_Ti_2   | 3.2835 | 0.1147 | 1115.67 | 1115.315 | 6332.8                                                      | 2 | 1154.3 | 83.3 | 2 K.SLLQALNEVK.G                         |
| *             | HsFLAG-p53-DNA-D   | 5.0016 | 0.3061 | 1717.95 | 1717.954 | 7032.8                                                      | 1 | 1570.2 | 75   | 6 R.ILDDDTIITLENLK.R                     |
| *             | HsFLAG-p53-DNA-D   | 3.136  | 0.2345 | 1967.09 | 1968.133 | 7684.1                                                      | 1 | 677.6  | 53.1 | 2 K.GTVGEPTYDAEFQHFLR.G                  |
| *             | HsFLAG-p53-DNA-D   | 3.7042 | 0.2481 | 3326.17 | 3326.693 | 8684.6                                                      | 1 | 718.4  | 26.9 | 1 R.REEFVQWVELLPDTQTSPWGLPNNAER.V        |
| *             | HsFLAG-ARP6_Ti_2   | 2.8805 | 0.3887 | 1406.64 | 1405.693 | 8533.1                                                      | 1 | 849    | 62.5 | 1 R.VLLTTQGVDMISK.M                      |
| *             | HsFLAG-Lin9_Ti_20( | 3.7048 | 0.3701 | 2411.73 | 2412.797 | 6416.5                                                      | 1 | 577.5  | 45   | 1 R.TLHTTASNWLHLIPQTLSHLK.R              |
| *             | HsFLAG-ARP6_Ti_1(  | 3.9316 | 0.3699 | 1798.8  | 1799.121 | 5775.6                                                      | 1 | 655.9  | 56.2 | 2 K.LSLSNAISTALPLTLQLR.W                 |
| *             | HsFLAG-p53-DNA-D   | 3.5696 | 0.3172 | 1581.21 | 1580.867 | 3759.4                                                      | 2 | 424.1  | 61.5 | 3 K.ASVVTLPVYLNFR.A                      |
| gil7661686 re | 12                 | 35     | 13.70% | 1717    | 194190   | 7.2 polymerase (RNA) I polypeptide A, 194kDa [Homo sapiens] |   |        |      |                                          |
| *             | HsFlag-NUFIP_Ti_1( | 4.0452 | 0.2257 | 3953.33 | 3952.308 | 9161.1                                                      | 3 | 476.9  | 18.2 | 1 K.EVCSTCVQDFSNCSGHLGHIPLTVYNPLLLFDK.L  |
| *             | HsFlag-NUFIP_Ti_1( | 3.2139 | 0.2119 | 1286.02 | 1286.578 | 5232.6                                                      | 1 | 644.7  | 75   | 4 K.LTITFPAMVHR.T                        |
| *             | HsFlag-NUFIP_Ti_11 | 4.3107 | 0.3608 | 1981.82 | 1982.332 | 4131.7                                                      | 1 | 815.4  | 68.8 | 6 R.FNPSVFFLDFLVVPPSR.S                  |
| *             | HsFlag-NUFIP_Ti_1( | 3.1855 | 0.1813 | 2616.34 | 2615.041 | 9181.7                                                      | 2 | 629    | 36.4 | 1 R.SVICPDYINTNEIGIPMFATK.L              |
| *             | HsFLAG-p53-DNA-D   | 2.5614 | 0.2064 | 1941.15 | 1942.225 | 5995.4                                                      | 1 | 414.5  | 53.3 | 1 K.LTYPQPVTWVQELR.Q                     |
| *             | HsFlag-NUFIP_Ti_11 | 3.0019 | 0.2774 | 1608.09 | 1608.878 | 5051.1                                                      | 3 | 393.7  | 50   | 1 K.QLLTPATGAPKPGTK.I                    |
| *             | HsFLAG-TIP49b_Ti_  | 4.3758 | 0.3602 | 1596.62 | 1597.734 | 9156.4                                                      | 1 | 1468.2 | 69.2 | 9 R.IIEESTHCGPQAVR.A                     |
| *             | HsFLAG-ARP6_Ti_1(  | 3.2805 | 0.3149 | 2153.96 | 2155.323 | 7799.9                                                      | 1 | 731    | 44.7 | 3 R.DSDGSVVQFLYGEDGLDIPK.T               |
| *             | HsFlag-NUFIP_Ti_1( | 3.8875 | 0.2814 | 3591.45 | 3591.984 | 5738.3                                                      | 1 | 547.2  | 25.8 | 2 R.SLCEPGEAVGLLAAQSIGEPSTQMTLNTFFHAGR.G |
| *             | HsFlag-NUFIP_Ti_1( | 4.6338 | 0.1619 | 1700.8  | 1699.906 | 4620.8                                                      | 1 | 1552.6 | 91.7 | 5 R.FQFLPHAYYQQEK.C                      |



|               |                     |        |        |         |          |                                                                           |   |        |      |    |                                         |
|---------------|---------------------|--------|--------|---------|----------|---------------------------------------------------------------------------|---|--------|------|----|-----------------------------------------|
| *             | HsFlag-NUFIP_Ti_11  | 4.4921 | 0.4859 | 2337.21 | 2337.739 | 7350.6                                                                    | 1 | 797.9  | 45.2 | 1  | K.INFDMSSLVVS LAHGAVIYATK.G             |
| *             | HsFLAG-p53-DNA-D    | 4.0694 | 0.3755 | 1830.58 | 1830.131 | 8369.2                                                                    | 1 | 1449   | 66.7 | 1  | K.ELVLNTEGINLPELKF.Y                    |
| gi 4504715 re | 6                   | 13     | 13.70% | 644     | 70783    | 9.3 poly A binding protein, cytoplasmic 4 [Homo sapiens]                  |   |        |      |    |                                         |
| *             | HsFLAG-ARP6_Ti_1    | 3.0589 | 0.308  | 1929.23 | 1930.084 | 9460.6                                                                    | 1 | 1041   | 53.1 | 1  | R.SLGYAYVNFQQPADAER.A                   |
| *             | HsFLAG-ARP6_Ti_1    | 3.0592 | 0.2797 | 1267.66 | 1267.483 | 5025.5                                                                    | 1 | 890.6  | 80   | 1  | R.ALDTMNFVDVIK.G                        |
| *             | HsFLAG-ARP6_Ti_1    | 4.5583 | 0.3978 | 1807.79 | 1808.007 | 7833.5                                                                    | 1 | 1601.2 | 70   | 1  | K.ALYDTFSAFGNILSCK.V                    |
| *             | HsFLAG-ARP6_Ti_1    | 3.6131 | 0.4405 | 1663.85 | 1663.79  | 5123.3                                                                    | 1 | 681.7  | 57.1 | 3  | K.GFGFVCFSSPEEATK.A                     |
| *             | HsFLAG-ARP6_Ti_1    | 4.0483 | 0.2689 | 1515.47 | 1515.839 | 3303.3                                                                    | 1 | 807.6  | 76.9 | 2  | R.IVGSKPLYVALAQR.K                      |
| *             | HsFlag-NUFIP_Ti_11  | 4.9939 | 0.3372 | 1670.28 | 1671.01  | 6146.3                                                                    | 1 | 1228.5 | 78.6 | 5  | R.LFPLIQTMHSNLAGK.I                     |
| gi 5729933 re | 4                   | 5      | 13.70% | 568     | 63634    | 8.4 septin 9 [Homo sapiens]                                               |   |        |      |    |                                         |
| *             | HsFlag-NUFIP_Ti_20  | 3.0652 | 0.2609 | 1464.18 | 1464.659 | 3609.8                                                                    | 3 | 418.4  | 60.7 | 1  | K.VPEVPTAPATDAAPK.R                     |
| *             | HsFLAG-p53-DNA-D    | 4.5514 | 0.3161 | 3856.92 | 3857.331 | 8521.4                                                                    | 1 | 1128.3 | 26.4 | 1  | K.RVEIQMPKPAEAPTAPSPAQTLENSPAPVSQLQSR.L |
| *             | HsFlag-VPS71_Ti_10  | 4.8074 | 0.4573 | 2011.87 | 2011.3   | 4940.8                                                                    | 1 | 1033.9 | 64.7 | 2  | K.APVDFGYVIGDSILEQMR.R                  |
| *             | HsFlag-VPS71_Ti_10  | 2.744  | 0.2445 | 1072.26 | 1072.16  | 6670.9                                                                    | 4 | 832.1  | 75   | 1  | K.SITHDIEEK.G                           |
| gi 48526509 r | 5                   | 14     | 13.60% | 456     | 50465    | 9.4 translocase of inner mitochondrial membrane 50 homolog [Homo sapiens] |   |        |      |    |                                         |
| *             | HsFLAG-ARP6_Ti_1    | 3.7608 | 0.3119 | 1271.28 | 1271.376 | 5987.8                                                                    | 3 | 699.2  | 68.2 | 2  | R.RAPDQAAEIGSR.G                        |
| *             | HsFLAG-ARP6_Ti_1    | 4.2024 | 0.3399 | 1730.46 | 1730.831 | 4434.2                                                                    | 1 | 580.1  | 59.4 | 2  | K.AQGPPQQPGSEGPSYAK.K                   |
| *             | HsFLAG-ARP6_Ti_1    | 4.5545 | 0.3793 | 1913.42 | 1913.138 | 5884.5                                                                    | 1 | 1149.9 | 66.7 | 3  | K.IPDEFDNDPILVQQLR.R                    |
| *             | HsFLAG-ARP6_Ti_1    | 5.2204 | 0.4623 | 1932.47 | 1933.168 | 7497.3                                                                    | 1 | 1683   | 68.8 | 5  | R.TVLEHYALEDDPLAFAFK.Q                  |
| *             | HsFLAG-ARP6_Ti_1    | 4.2129 | 0.2971 | 1933.42 | 1933.168 | 5600.8                                                                    | 1 | 1160.3 | 48.4 | 2  | R.TVLEHYALEDDPLAFAFK.Q                  |
| gi 4504191 re | 12                  | 30     | 13.50% | 1360    | 152785   | 6.9 mutS homolog 6 [Homo sapiens]                                         |   |        |      |    |                                         |
| *             | HsYL1_Ti_102.2326.  | 4.0417 | 0.248  | 2179.09 | 2177.384 | 4783.6                                                                    | 1 | 377.3  | 45   | 4  | R.SVAPAAPTSCDFSPGDLVWAK.M               |
| *             | HsSrcap_Ti_206.229  | 3.2839 | 0.2406 | 1476.24 | 1475.69  | 7781.2                                                                    | 1 | 1159.7 | 66.7 | 1  | K.GGHFYSAPKPEILR.A                      |
| *             | HsFLAG-FLJ20729_    | 3.049  | 0.4167 | 1647.22 | 1646.805 | 8690.7                                                                    | 1 | 811.1  | 53.6 | 2  | K.GNWAHSGFPEIAFGR.Y                     |
| *             | HsYL1_Ti_101.1990.  | 3.9848 | 0.38   | 1975.9  | 1976.061 | 6663.4                                                                    | 1 | 1107.7 | 61.8 | 3  | K.GTQTYSVLEGDPSENYSK.Y                  |
| *             | HsYL1_Ti_105.2258.  | 3.5717 | 0.2676 | 1741.09 | 1742.071 | 2981.9                                                                    | 1 | 530.7  | 67.9 | 2  | R.TLVAHYPPVQVLFK.G                      |
| *             | HsYL1_Ti_102.2854.  | 3.1207 | 0.2416 | 2398.86 | 2398.598 | 3292.2                                                                    | 1 | 380.7  | 47.6 | 1  | K.SSLCSLQEGSLIPGSQFWDASK.T              |
| *             | HsYL1_Ti_106.1906.  | 2.5503 | 0.2711 | 964.68  | 965.14   | 4175.2                                                                    | 1 | 452.4  | 75   | 4  | K.IHNVGSPLK.S                           |
| *             | HsYL1_Ti_101.1780.  | 2.9954 | 0.2882 | 1336.44 | 1336.499 | 4819.6                                                                    | 1 | 769.3  | 75   | 1  | R.AIMYEETYSK.K                          |
| *             | HsYL1_Ti_102.3516.  | 2.0271 | 0.2293 | 1352.63 | 1353.601 | 7107.7                                                                    | 1 | 799.2  | 68.2 | 1  | K.IIDFLSALEGFK.V                        |
| *             | HsYL1_Ti_102.3506.  | 4.6855 | 0.1471 | 1355.07 | 1353.601 | 5026.3                                                                    | 1 | 1348.4 | 86.4 | 4  | K.IIDFLSALEGFK.V                        |
| *             | HsFLAG-FLJ20729_    | 5.2726 | 0.4174 | 3134.89 | 3134.337 | 8735.5                                                                    | 1 | 1836.3 | 33.7 | 6  | K.AGFSDSDYDQALADIRENEQSLLLEYLQ.K        |
| *             | HsFLAG-Lin9_Ti_20   | 3.5035 | 0.3395 | 2465.89 | 2467.7   | 14045.7                                                                   | 1 | 1280.2 | 45   | 1  | R.TLFSTHYHSLVEDYSQNVAVR.L               |
| gi 47271406 r | 4                   | 12     | 13.50% | 689     | 74355    | 9.6 bin3, bicoid-interacting 3 [Homo sapiens]                             |   |        |      |    |                                         |
| *             | HsFlag-VPS71_Ti_10  | 4.2264 | 0.4027 | 4019.7  | 4021.396 | 6804.2                                                                    | 1 | 760.9  | 25.7 | 2  | R.VNSDCDSVLPNFFLLGGNIFDPLNLSLLDEEVS.R.T |
| *             | HsSrcap_Ti_202.550  | 3.5765 | 0.2061 | 3864.99 | 3865.209 | 6055.2                                                                    | 2 | 445.2  | 20.6 | 1  | R.VNSDCDSVLPNFFLLGGNIFDPLNLSLLDEEVS.R.T |
| *             | HsFlag-NUFIP_Ti_10  | 4.9469 | 0.3648 | 2596.45 | 2596.86  | 7261.6                                                                    | 1 | 947.2  | 47.8 | 2  | K.DITDPLSLNCTDEGHVVLASPLK.T             |
| *             | HsFlag-NUFIP_Ti_10  | 5.97   | 0.3965 | 3671.92 | 3673.07  | 9624.9                                                                    | 1 | 1526.5 | 28.9 | 7  | R.IQLKPEQFSSYLTPDVGFFSSYELVATPHNTSK.G   |
| gi 13676857 r | 13                  | 176    | 13.50% | 639     | 70021    | 5.7 heat shock 70kDa protein 2 [Homo sapiens]                             |   |        |      |    |                                         |
| *             | HsFlag-FLJ90652_2   | 3.6517 | 0.3726 | 1487.89 | 1488.594 | 3812.9                                                                    | 1 | 610.4  | 75   | 34 | R.TTPSYVAFTDTER.L                       |
| *             | Hs293Flag-les2_Ti_1 | 3.2174 | 0.4318 | 1488.58 | 1488.594 | 3710.2                                                                    | 1 | 167.1  | 54.2 | 6  | R.TTPSYVAFTDTER.L                       |
| *             | HsYL1_Ti_103.1140.  | 2.546  | 0.195  | 1180.57 | 1181.331 | 4585.1                                                                    | 2 | 464.2  | 66.7 | 2  | K.VQVEYKGETK.T                          |
| *             | HsFLAG-ARP6_Ti_1    | 3.2097 | 0.268  | 1181.78 | 1181.331 | 4772.1                                                                    | 4 | 814.9  | 83.3 | 12 | K.VQVEYKGETK.T                          |

|             |                    |        |        |         |          |         |   |        |      |    |                                                                                                          |
|-------------|--------------------|--------|--------|---------|----------|---------|---|--------|------|----|----------------------------------------------------------------------------------------------------------|
| *           | HsFLAG-ARP6_Ti_1   | 3.4481 | 0.2614 | 1904.56 | 1905.12  | 4323.4  | 1 | 568.5  | 56.2 | 2  | K.VHSAVITVPAYFNDSQR.Q                                                                                    |
|             | HsFLAG-Lin9_Ti_20  | 5.2508 | 0.4465 | 1660.49 | 1660.908 | 5331.5  | 1 | 1768.4 | 80   | 50 | R.IINEPTAAAAIAYGLDK.K                                                                                    |
|             | HsFLAG-ARP5_Ti_1   | 3.8699 | 0.1778 | 1788.62 | 1789.082 | 4190.7  | 1 | 571.2  | 59.4 | 2  | R.IINEPTAAAAIAYGLDK.K                                                                                    |
|             | HsFlag-FLJ90652_2  | 2.0904 | 0.2727 | 1480.7  | 1481.651 | 2330.8  | 4 | 142.3  | 59.1 | 1  | R.ARFEELNADLFR.G                                                                                         |
|             | HsFLAG-ARP6_Ti_1   | 4.2068 | 0.2215 | 1481.81 | 1481.651 | 6808.7  | 1 | 1830.4 | 59.1 | 3  | R.ARFEELNADLFR.G                                                                                         |
|             | HsYL1_Ti_103.1942  | 4.6423 | 0.2622 | 1483.93 | 1481.651 | 4875.6  | 1 | 1115   | 86.4 | 58 | R.ARFEELNADLFR.G                                                                                         |
|             | HsFlag-FLJ90652_2  | 3.6003 | 0.2919 | 1254.46 | 1254.385 | 7777.4  | 2 | 1585.6 | 88.9 | 3  | R.FEELNADLFR.G                                                                                           |
|             | HsTIP60_Ti_105.226 | 2.8115 | 0.2224 | 1082.24 | 1082.244 | 4474.4  | 5 | 672.9  | 87.5 | 2  | K.LLQDFFNGK.E                                                                                            |
|             | HsFlag-FLJ90652_2  | 2.5343 | 0.1365 | 931.17  | 931.08   | 5013.8  | 4 | 875.8  | 100  | 1  | K.RNTTIPTK.Q                                                                                             |
| gi 89038196 | 22                 | 65     | 13.40% | 2855    | 315119   |         |   |        |      |    | 6.8 PREDICTED: MAX dimerization protein 5 isoform 1 [Homo sapiens]                                       |
| gi 89038895 | 22                 | 65     | 13.40% | 2855    | 315105   |         |   |        |      |    | 6.8 PREDICTED: similar to MAX-interacting protein isoform 6 [Homo sapiens]                               |
| gi 89038893 | 22                 | 65     | 13.40% | 2855    | 315105   |         |   |        |      |    | 6.8 PREDICTED: similar to MAX-interacting protein isoform 5 [Homo sapiens]                               |
| gi 89038198 | 22                 | 65     | 13.40% | 2855    | 315119   |         |   |        |      |    | 6.8 PREDICTED: MAX dimerization protein 5 isoform 2 [Homo sapiens]                                       |
|             | HsFlag-DPCD_Ti_20  | 3.7048 | 0.2784 | 2012.31 | 2013.169 | 5622.3  | 3 | 553.1  | 47.2 | 1  | R.LTEGQGSEIQPGDLPLSR.G                                                                                   |
|             | HsFlag-DPCD_Ti_20  | 4.2623 | 0.3371 | 1992.36 | 1993.187 | 8815.1  | 1 | 1444.7 | 70   | 2  | K.KLEYTICETEPEQPVR.H                                                                                     |
|             | HsFlag-VPS71_Ti_1  | 4.2291 | 0.3244 | 4039.19 | 4039.757 | 5720.9  | 1 | 592.2  | 24.3 | 1  | K.VEGEVDPEPVYIPTPSVIEPMKPLLLPQPEVLSPTVK.G                                                                |
|             | HsH2AZ-FLAG_293_   | 3.0861 | 0.3167 | 1278.2  | 1278.494 | 4331.2  | 1 | 552.1  | 66.7 | 1  | K.GLPFYAGLSPAGK.L                                                                                        |
|             | HsFlag-DPCD_Ti_20  | 4.7908 | 0.3411 | 3218.29 | 3217.69  | 6179.1  | 1 | 873    | 30.6 | 5  | K.ITYSSGGQPVGTASLIPLQSGSFALLQLPGQK.P                                                                     |
|             | HsARP6-FLAG_Ti_1   | 4.4752 | 0.484  | 1735.4  | 1736.083 | 5389.2  | 1 | 1033.7 | 70   | 4  | K.PVPSSILQHVASLQMK.R                                                                                     |
|             | HsFlag-DPCD_Ti_20  | 4.5004 | 0.3473 | 1926.62 | 1927.162 | 5482    | 1 | 1173.8 | 67.6 | 3  | K.KVLQSEGEAVDPEANVIK.Q                                                                                   |
|             | HsFlag-DPCD_Ti_20  | 5.0603 | 0.4001 | 1798.41 | 1798.988 | 6776.8  | 1 | 1803.8 | 75   | 2  | K.VLQSEGEAVDPEANVIK.Q                                                                                    |
|             | HsH2AZ-FLAG_293_   | 4.963  | 0.4677 | 2396.97 | 2397.524 | 6338.3  | 1 | 1158.1 | 57.5 | 5  | K.TCQENSDFVQQEQGISDLLGK.S                                                                                |
|             | HsH2AZ-FLAG_293_   | 3.6255 | 0.2295 | 1287.91 | 1288.489 | 5396.3  | 1 | 1255.3 | 81.8 | 4  | R.ISNPSAFSIVPR.R                                                                                         |
|             | HsFLAG-p53-DNA-D   | 2.8884 | 0.2818 | 1091.5  | 1092.197 | 5707    | 1 | 578.2  | 72.2 | 2  | K.TTAAHTQSFK.Q                                                                                           |
|             | HsH2AZ-FLAG_293_   | 5.1181 | 0.3302 | 1523.49 | 1523.64  | 5411.6  | 1 | 1693.6 | 84.6 | 3  | R.AFSEIQGLTDQADK.L                                                                                       |
|             | HsFLAG-p53-DNA-D   | 5.2647 | 0.3378 | 3578.65 | 3579.063 | 9328.8  | 1 | 1555.7 | 29.7 | 1  | R.KKDQATENTSPLNTPHTSANLVMTPQGQLLTLK.G                                                                    |
|             | HsFlag-DPCD_Ti_20  | 3.8662 | 0.2702 | 3321.09 | 3322.715 | 8532.9  | 1 | 670.3  | 23.3 | 3  | K.DQATENTSPLNTPHTSANLVMTPQGQLLTLK.G                                                                      |
|             | HsFlag-DPCD_Ti_20  | 3.5515 | 0.3308 | 2140.78 | 2141.469 | 6821.2  | 1 | 579    | 42.5 | 2  | K.GPLFSGPVVAVSPDLLESLDK.P                                                                                |
|             | HsFlag-NUFIP_Ti_1  | 5.5706 | 0.4292 | 4381.26 | 4382.046 | 8363.8  | 1 | 1141.3 | 23.2 | 2  | MPR.I                                                                                                    |
|             | HsFlag-DPCD_Ti_20  | 3.4058 | 0.4872 | 1947.54 | 1949.227 | 10467.8 | 1 | 963.4  | 47.4 | 2  | R.IVNVTSLATTEGGLVDMGGSK.Y                                                                                |
|             | HsFlag-DPCD_Ti_20  | 3.0496 | 0.2944 | 1749.43 | 1749.921 | 6818.8  | 1 | 820.4  | 64.3 | 2  | K.YPHEVPDSKPSDHLK.D                                                                                      |
|             | HsARP6-FLAG_Ti_1   | 3.7748 | 0.364  | 1388.3  | 1388.65  | 6527.4  | 1 | 1029.5 | 70.8 | 5  | R.VTLGPTQVFLANK.D                                                                                        |
|             | HsFlag-DPCD_Ti_20  | 3.6222 | 0.2564 | 1401.6  | 1401.605 | 7175.6  | 1 | 1228.3 | 75   | 8  | R.ATFQVEHLGTGLK.E                                                                                        |
|             | HsFlag-DPCD_Ti_20  | 4.1994 | 0.4007 | 2179.52 | 2180.438 | 4964.3  | 1 | 1069.2 | 62.5 | 5  | K.NTSGLPAEPESVSSPPTLHMK.T                                                                                |
|             | HsFlag-DPCD_Ti_20  | 3.3924 | 0.1149 | 2047.02 | 2048.278 | 9380.6  | 1 | 977.2  | 52.9 | 2  | K.TGLENSNSTDTLWRPMPK.L                                                                                   |
| gi 21237805 | 11                 | 49     | 13.40% | 1214    | 132879   |         |   |        |      |    | 5.7 SWI/SNF-related matrix-associated actin-dependent regulator of chromatin c2 isoform a [Homo sapiens] |
| gi 21237808 | 11                 | 49     | 14.40% | 1130    | 124841   |         |   |        |      |    | 5.6 SWI/SNF-related matrix-associated actin-dependent regulator of chromatin c2 isoform b [Homo sapiens] |
|             | HsFLAG-p53-DNA-D   | 4.1114 | 0.4749 | 1792.84 | 1792.899 | 7272.8  | 1 | 1239.1 | 71.4 | 1  | K.YYEAADTVTQFDNVR.L                                                                                      |
|             | HsFLAG-p53-DNA-D   | 3.7352 | 0.2449 | 1289.6  | 1289.474 | 6709.3  | 2 | 861    | 75   | 1  | K.KYIQAEPPTNK.S                                                                                          |
|             | HsFLAG-p53-DNA-D   | 5.9718 | 0.4547 | 2152.04 | 2152.496 | 8061.2  | 1 | 2200.4 | 69.4 | 22 | K.SLSSLVVQLLQFQEEVFGK.H                                                                                  |
|             | HsFLAG-p53-DNA-D   | 2.0841 | 0.2953 | 966.51  | 967.113  | 4711.4  | 1 | 402.8  | 62.5 | 2  | K.HVSNAPLTK.L                                                                                            |
|             | HsFLAG-Lin9_Ti_20  | 4.1184 | 0.4231 | 1432.23 | 1432.629 | 9494.1  | 1 | 1366.4 | 61.5 | 2  | K.AGGSLSCHILAAAYK.F                                                                                      |
|             | HsFLAG-p53-DNA-D   | 5.5115 | 0.4502 | 2894.72 | 2895.262 | 7963.5  | 1 | 1160   | 32.3 | 4  | K.NNASHVVYPVPGNLEEEEWVRPVMK.R                                                                            |

|                |                    |        |        |         |          |                                                                                |   |        |      |                                             |
|----------------|--------------------|--------|--------|---------|----------|--------------------------------------------------------------------------------|---|--------|------|---------------------------------------------|
|                | HsFlag-VPS71_Ti_1( | 3.4336 | 0.1859 | 2240.34 | 2240.573 | 8004.4                                                                         | 1 | 732.2  | 50   | 1 R.EWTEQETLLLLLEALEMYK.D                   |
|                | HsFlag-VPS71_Ti_1( | 4.0724 | 0.2671 | 1432.39 | 1432.585 | 6575.7                                                                         | 1 | 1169.4 | 80   | 6 R.TQDECILHFLR.L                           |
|                | HsFLAG-p53-DNA-D   | 6.743  | 0.4825 | 1885.3  | 1886.112 | 9907.1                                                                         | 1 | 2725.6 | 67.5 | 5 R.DIGEGNLSTAAAAALAAAVK.A                  |
|                | HsFLAG-p53-DNA-D   | 2.1902 | 0.198  | 924.5   | 925.032  | 4939.2                                                                         | 1 | 519.1  | 78.6 | 1 K.HLAAVEER.K                              |
|                | HsARP6-FLAG_Ti_1   | 4.2653 | 0.3252 | 1332.08 | 1332.642 | 7108.5                                                                         | 1 | 1762   | 86.4 | 4 K.SLVALLVETQMK.K                          |
| gij 24415383 r | 11                 | 27     | 13.40% | 1130    | 119624   | 4.3 proline-, glutamic acid-, leucine-rich protein 1 [Homo sapiens]            |   |        |      |                                             |
| *              | HsH2AZ-FLAG_293_   | 3.7257 | 0.2665 | 1538.65 | 1538.871 | 8385.3                                                                         | 1 | 1896.7 | 55.8 | 1 R.LLLESVSGLLQPR.T                         |
| *              | HsH2AZ-FLAG_293_   | 4.0044 | 0.1993 | 1539.54 | 1538.871 | 6318.4                                                                         | 1 | 998.9  | 69.2 | 5 R.LLLESVSGLLQPR.T                         |
| *              | HsH2AZ-FLAG_293_   | 2.8642 | 0.3242 | 1303.26 | 1303.464 | 4898.2                                                                         | 1 | 829.4  | 70.8 | 2 R.TGSAVAPVHPPNR.S                         |
| *              | HsH2AZ-FLAG_293_   | 4.1615 | 0.5634 | 2294.25 | 2293.588 | 7597                                                                           | 1 | 1098   | 54.3 | 1 R.LHGSGGAQNLGALVSLSNAR.L                  |
| *              | HsH2AZ-FLAG_293_   | 2.8692 | 0.1078 | 941.19  | 941.118  | 4288.8                                                                         | 1 | 778.5  | 92.9 | 1 K.LASFFLSR.V                              |
| *              | HsH2AZ-FLAG_293_   | 4.7807 | 0.4205 | 2138.3  | 2139.302 | 6881.8                                                                         | 1 | 1428.3 | 64.7 | 2 R.VDALSPQLQLACECYSR.L                     |
| *              | HsH2AZ-FLAG_293_   | 3.8216 | 0.271  | 1275.4  | 1275.491 | 4574.4                                                                         | 1 | 1236.8 | 87.5 | 1 R.LPSLGAGFSQGLK.H                         |
| *              | HsH2AZ-FLAG_293_   | 2.8555 | 0.1851 | 1179.56 | 1179.321 | 7575.8                                                                         | 1 | 930.3  | 70   | 2 K.NISLHGDGPLR.L                           |
| *              | HsH2AZ-FLAG_293_   | 3.3703 | 0.2726 | 1483.42 | 1483.754 | 3018.2                                                                         | 1 | 548.7  | 79.2 | 2 R.LLPQVLNSWSIGR.D                         |
| *              | HsH2AZ-FLAG_293_   | 4.0638 | 0.3574 | 1528.32 | 1527.674 | 6764.2                                                                         | 1 | 990    | 63.3 | 8 R.GSPDGLTQTKPSAPK.K                       |
| *              | HsH2AZ-FLAG_293_   | 3.6783 | 0.4085 | 2109.53 | 2110.285 | 4611.5                                                                         | 1 | 475.2  | 47.5 | 2 R.GADTAPTLAPEALPSQGEVER.E                 |
| gij 42558250 r | 4                  | 10     | 13.40% | 709     | 78366    | 5.2 membrane component chromosome 11 surface marker 1 isoform 1 [Homo sapiens] |   |        |      |                                             |
| gij 42734503 r | 4                  | 10     | 13.70% | 694     | 76862    | 5.1 membrane component chromosome 11 surface marker 1 isoform 2 [Homo sapiens] |   |        |      |                                             |
|                | HsFlag-VPS71_Ti_1( | 5.4964 | 0.3812 | 3704    | 3705.949 | 6633.7                                                                         | 1 | 1124.2 | 28   | 2 EAMK.Q                                    |
|                | HsFlag-VPS71_Ti_1( | 3.7015 | 0.2464 | 1456.72 | 1456.595 | 5638.3                                                                         | 1 | 1092.5 | 81.8 | 1 K.YQEVNLEFAK.E                            |
|                | HsFlag-VPS71_Ti_1( | 4.4994 | 0.3328 | 2495.78 | 2494.801 | 3404                                                                           | 1 | 418.9  | 47.6 | 4 K.QGLNGVPILSEELSLDEFYK.L                  |
|                | HsFlag-VPS71_Ti_1( | 3.7922 | 0.3854 | 2294.84 | 2296.544 | 9590.3                                                                         | 1 | 1179.6 | 52.8 | 3 R.LNEQYEHASIHLDLLEGGK.E                   |
| gij 24308207 r | 4                  | 7      | 13.40% | 583     | 63473    | 8.3 leucine rich repeat containing 47 [Homo sapiens]                           |   |        |      |                                             |
| *              | HsFLAG-Lin9_Ti_20( | 5.2652 | 0.4912 | 4159.06 | 4159.661 | 8523.5                                                                         | 1 | 1319.9 | 26.4 | 3 R.LQSLNLTGNCLDSFPAELFRPGALPLLELAAADNCLR.E |
| *              | HsFLAG-FLJ20729_   | 3.1777 | 0.1806 | 1561.45 | 1560.837 | 8740.1                                                                         | 2 | 886    | 57.7 | 1 R.VLHVSENPVPLTVR.V                        |
| *              | HsFLAG-FLJ20729_   | 2.7799 | 0.2243 | 1340.52 | 1340.525 | 6708                                                                           | 1 | 685.9  | 68.2 | 2 K.RTAATLATHELR.A                          |
| *              | HsFLAG-Lin9_Ti_20( | 3.1397 | 0.3507 | 1628.1  | 1628.878 | 7755.4                                                                         | 1 | 639.1  | 53.8 | 1 K.GPLLYCARPPQDLK.I                        |
| gij 19913408 r | 16                 | 36     | 13.30% | 1621    | 182661   | 8.1 DNA topoisomerase II, beta isozyme [Homo sapiens]                          |   |        |      |                                             |
|                | HsFLAG-Lin9_Ti_20( | 3.9805 | 0.1768 | 1462.4  | 1462.643 | 8120.4                                                                         | 1 | 1780.5 | 79.2 | 3 K.IFDEILVNAADNK.Q                         |
| *              | HsFLAG-FLJ20729_   | 3.385  | 0.3389 | 1886.51 | 1887.1   | 7747.4                                                                         | 1 | 628.1  | 50   | 1 K.VSIDPESNIISWNGGK.G                      |
|                | HsFLAG-FLJ20729_   | 2.6641 | 0.3413 | 1234.61 | 1235.469 | 4339                                                                           | 5 | 421.9  | 70   | 1 K.GIPVVEHKVEK.V                           |
| *              | HsFLAG-p53-DNA-D   | 5.6512 | 0.3568 | 2489.31 | 2488.753 | 8527.4                                                                         | 1 | 1891.8 | 59.5 | 8 K.VYVPALIFGQLLTSSNYDDDEK.K                |
| *              | HsFLAG-Lin9_Ti_20( | 4.0216 | 0.3752 | 2176.93 | 2174.294 | 9774.2                                                                         | 1 | 932.5  | 50   | 1 K.HFDGEDYTCITFQPDLSK.F                    |
| *              | HsFLAG-Lin9_Ti_20( | 2.9967 | 0.185  | 1160.24 | 1160.402 | 6083.8                                                                         | 8 | 707.7  | 70   | 1 K.AGVSVKPFQVK.N                           |
| *              | HsFLAG-FLJ20729_   | 3.567  | 0.2872 | 1761.17 | 1761.982 | 8557.9                                                                         | 1 | 1041   | 56.7 | 3 K.AASNCGIVESILNWKV.F                      |
| *              | HsFLAG-p53-DNA-D   | 4.8623 | 0.3512 | 1530.64 | 1530.807 | 6922.6                                                                         | 1 | 1633.3 | 79.2 | 3 K.HGFLEEFITPIVK.A                         |
| *              | HsFLAG-FLJ20729_   | 4.8096 | 0.4538 | 1833    | 1832.112 | 10496.5                                                                        | 1 | 1252.4 | 60   | 2 R.RLHGLPEQFLYGTATK.H                      |
| *              | HsFLAG-FLJ20729_   | 2.5229 | 0.1398 | 1675.1  | 1675.925 | 4644.9                                                                         | 1 | 397.3  | 50   | 1 R.LHGLPEQFLYGTATK.H                       |
| *              | HsFLAG-Lin9_Ti_20( | 2.7382 | 0.1771 | 1264.85 | 1265.411 | 6432.9                                                                         | 1 | 659.6  | 72.2 | 1 K.HLTYNDFINK.E                            |
| *              | HsFLAG-p53-DNA-D   | 3.105  | 0.3473 | 1501.44 | 1501.726 | 4375.4                                                                         | 2 | 378    | 57.7 | 2 R.SIPSLVDGFKPGQR.K                        |
| *              | HsFLAG-p53-DNA-D   | 3.773  | 0.2148 | 1109.02 | 1109.271 | 6445.4                                                                         | 1 | 1425   | 90   | 5 K.LAQAEAAAGLHK.V                          |
| *              | HsFLAG-p53-DNA-D   | 3.1166 | 0.315  | 1982.57 | 1981.172 | 7037.8                                                                         | 1 | 578.7  | 50   | 1 K.KSQDFGNLFSFSPYSQK.S                     |

|               |                    |        |        |         |          |         |   |        |      |    |                                                                                      |
|---------------|--------------------|--------|--------|---------|----------|---------|---|--------|------|----|--------------------------------------------------------------------------------------|
| *             | HsFLAG-FLJ20729_   | 3.8123 | 0.3829 | 1852.71 | 1852.998 | 7395.9  | 1 | 708.4  | 53.3 | 2  | K.SQDFGNLFSFPSYSQK.S                                                                 |
| *             | HsFLAG-Lin9_Ti_20  | 3.8954 | 0.1256 | 2939.52 | 2939.161 | 9149.9  | 5 | 784.9  | 27   | 1  | K.KTSFDQDSDVDIFPSDFPTEPPSLPR.T                                                       |
| gi 40807485 r | 10                 | 18     | 13.30% | 941     | 106925   |         |   |        |      |    | 8.3 U5 snRNP-associated 102 kDa protein [Homo sapiens]                               |
| *             | HsFLAG-p53-DNA-D   | 3.9817 | 0.4477 | 1591.53 | 1591.68  | 3162.8  | 1 | 464.8  | 69.2 | 4  | K.HLQTGENHTSVDPR.Q                                                                   |
| *             | HsFlag-DPCD_Ti_20  | 4.5338 | 0.4349 | 1746.33 | 1746.912 | 7189    | 1 | 1291.9 | 65.6 | 1  | R.LSQVSDSVSGQTVVDPK.G                                                                |
| *             | HsFlag-ZnF-HIT2_Ti | 3.0227 | 0.3073 | 1123.55 | 1122.269 | 4137.7  | 1 | 555.7  | 77.8 | 1  | K.ALEHVPNSVR.L                                                                       |
| *             | HsFLAG-Lin9_Ti_20  | 3.3061 | 0.4114 | 1977.47 | 1976.212 | 8326.1  | 1 | 569.8  | 46.9 | 1  | R.AVECCPTSVELWLALAR.L                                                                |
| *             | HsFlag-ZnF-HIT2_Ti | 2.6143 | 0.0976 | 1071.89 | 1072.166 | 5207.4  | 1 | 599    | 81.2 | 1  | K.ARENIPTDR.H                                                                        |
|               | HsFLAG-Lin9_Ti_20  | 3.565  | 0.2948 | 1599.41 | 1599.913 | 9168    | 1 | 1175.8 | 61.5 | 2  | R.AIYAYALQVFPSKK.S                                                                   |
|               | HsFlag-ZnF-HIT2_Ti | 3.0571 | 0.1797 | 1150.29 | 1150.28  | 6214.9  | 2 | 919.8  | 83.3 | 1  | K.AREAYNQGLK.K                                                                       |
|               | HsARP6-FLAG_Ti_1   | 3.6791 | 0.3541 | 1171.23 | 1171.341 | 7113.9  | 1 | 1479.4 | 94.4 | 4  | K.NPGLWLESVR.L                                                                       |
|               | HsSrcap_Ti_202.386 | 3.5181 | 0.3417 | 1648.26 | 1648.812 | 10176.3 | 2 | 920.5  | 57.7 | 2  | K.IDSDLGDAWAFFYK.F                                                                   |
|               | HsFlag-ZnF-HIT2_Ti | 3.5196 | 0.2513 | 1187.28 | 1187.307 | 7173.9  | 1 | 1400.9 | 88.9 | 1  | R.HGELWCAVSK.D                                                                       |
| gi 4758860 re | 11                 | 85     | 13.30% | 699     | 73720    |         |   |        |      |    | 9.5 nucleolar and coiled-body phosphoprotein 1 [Homo sapiens]                        |
| *             | HsFLAG-ARP6_Ti_1   | 4.8651 | 0.4637 | 1844.45 | 1845.238 | 4225.6  | 1 | 769.1  | 66.7 | 11 | R.RVVPDLYPLVLGFLR.D                                                                  |
| *             | HsFLAG-Lin9_Ti_20  | 3.4007 | 0.4776 | 1688.52 | 1689.051 | 3147.3  | 1 | 476.3  | 67.9 | 14 | R.VVPSDLYPLVLGFLR.D                                                                  |
| *             | HsFLAG-Lin9_Ti_20  | 3.9874 | 0.3468 | 1688.94 | 1689.051 | 6240.7  | 1 | 1108.5 | 46.4 | 3  | R.VVPSDLYPLVLGFLR.D                                                                  |
| *             | HsVPS71-FLAG_Ti_   | 3.0778 | 0.1649 | 1118.97 | 1118.189 | 6636.1  | 2 | 806.5  | 77.8 | 3  | R.DNQLSEVANK.F                                                                       |
| *             | HsFLAG-ARP6_Ti_1   | 6.184  | 0.4492 | 2502.23 | 2501.755 | 9030.3  | 1 | 2299.4 | 59.1 | 40 | K.ATGATQQDANASSLLDIYSFWLK.S                                                          |
| *             | HsFlag-DPCD_Ti_20  | 1.9876 | 0.098  | 1025.47 | 1026.224 | 5491    | 1 | 428.5  | 66.7 | 1  | R.KLQANGPVAK.K                                                                       |
| *             | HsFlag-DPCD_Ti_20  | 2.5952 | 0.1175 | 1025.96 | 1026.224 | 7821.6  | 4 | 760.1  | 72.2 | 1  | R.KLQANGPVAK.K                                                                       |
| *             | HsFLAG-p53-DNA-D   | 2.1379 | 0.1437 | 1036.64 | 1037.247 | 4644.9  | 9 | 428.7  | 60   | 5  | K.SPAVKPAAAPK.Q                                                                      |
| *             | HsFlag-DPCD_Ti_20  | 3.0715 | 0.2046 | 1037.29 | 1037.247 | 6216.7  | 8 | 976.1  | 80   | 3  | K.SPAVKPAAAPK.Q                                                                      |
| *             | HsFLAG-p53-DNA-D   | 2.7928 | 0.1491 | 1212.49 | 1212.392 | 5106.1  | 8 | 628.9  | 65.4 | 2  | K.VAGGAAPSKPASAK.K                                                                   |
| *             | HsFLAG-p53-DNA-D   | 2.4384 | 0.3294 | 966.31  | 967.023  | 7857.7  | 1 | 726.7  | 75   | 2  | R.VADNSFDAK.R                                                                        |
| gi 4758140 re | 3                  | 6      | 13.30% | 472     | 53216    |         |   |        |      |    | 8.7 DEAD (Asp-Glu-Ala-Asp) box polypeptide 6 [Homo sapiens]                          |
| *             | HsFLAG-FLJ20729_   | 4.2051 | 0.2296 | 2366.7  | 2367.642 | 10094.8 | 4 | 987.9  | 29.3 | 1  | R.GPVKPTGGPGGGGTQTQQQMNQLK.N                                                         |
| *             | HsFLAG-Lin9_Ti_20  | 3.2994 | 0.2376 | 2218.46 | 2217.669 | 8206.6  | 1 | 881    | 50   | 1  | K.LLSQDFVQIMEDIILTPK.N                                                               |
| *             | HsFLAG-FLJ20729_   | 5.4062 | 0.3618 | 2320.18 | 2321.684 | 11052.6 | 1 | 2478.2 | 63.2 | 4  | R.FGHLGLAINLITYDDRFNLK.S                                                             |
| gi 56237027 r | 5                  | 8      | 13.20% | 577     | 63481    |         |   |        |      |    | 9.2 insulin-like growth factor 2 mRNA binding protein 1 [Homo sapiens]               |
| *             | HsFLAG-p53-DNA-D   | 3.6698 | 0.3298 | 1876.13 | 1877.101 | 7266.6  | 1 | 1466.6 | 71.9 | 2  | K.LYIGNLNESVTPADLEK.V                                                                |
| *             | HsFLAG-p53-DNA-D   | 3.3702 | 0.2837 | 1472.34 | 1472.811 | 4125.6  | 1 | 620    | 69.2 | 2  | R.LLVPTQYVGAIGK.E                                                                    |
| *             | HsFLAG-p53-DNA-D   | 3.3998 | 0.3254 | 1692.24 | 1691.768 | 6286.7  | 2 | 561.6  | 53.3 | 2  | K.AISVHSTPEGCSSACK.M                                                                 |
| *             | HsFLAG-p53-DNA-D   | 2.8913 | 0.2637 | 1865.64 | 1864.106 | 9978.3  | 3 | 610.1  | 46.7 | 1  | K.ITISSLQDLTLYNPER.T                                                                 |
| *             | HsFLAG-ARP6_Ti_1   | 3.3671 | 0.1713 | 1500.73 | 1501.59  | 3865.7  | 1 | 691.1  | 75   | 1  | R.DQTPDENDQVIVK.I                                                                    |
| gi 4557493 re | 4                  | 15     | 13.20% | 577     | 60959    |         |   |        |      |    | 6.8 cleavage stimulation factor subunit 2 [Homo sapiens]                             |
|               | HsFLAG-p53-DNA-D   | 4.1486 | 0.4401 | 1923.83 | 1925.145 | 4061.6  | 1 | 467.9  | 56.2 | 7  | R.SVFGNIPYEATEEQLK.D                                                                 |
| *             | HsFlag-VPS71_Ti_1  | 4.3527 | 0.2865 | 1453.1  | 1452.65  | 5353.7  | 1 | 1243.4 | 79.2 | 5  | K.DIFSEVGPVVSFR.L                                                                    |
|               | HsFLAG-p53-DNA-D   | 3.2359 | 0.2699 | 2129.84 | 2127.256 | 7974.2  | 1 | 882.3  | 50   | 1  | K.GYGFCEYQDQETALSAMR.N                                                               |
| *             | HsFlag-VPS71_Ti_1  | 4.31   | 0.3491 | 2832.99 | 2833.075 | 7363.7  | 1 | 557.4  | 31.5 | 2  | K.SLGTGAPVIESPYGETISPEDAPESISK.A                                                     |
| gi 4503513 re | 3                  | 4      | 13.20% | 325     | 36502    |         |   |        |      |    | 5.6 eukaryotic translation initiation factor 3, subunit 2 beta, 36kDa [Homo sapiens] |
| *             | HsFlag-FLJ90652_2  | 2.7573 | 0.2517 | 1317.26 | 1317.367 | 5281.3  | 2 | 730.4  | 72.7 | 1  | K.HVLTGSADNSCR.L                                                                     |
| *             | HsFLAG-p53-DNA-D   | 4.1694 | 0.4099 | 1680.01 | 1680.863 | 8116.1  | 1 | 1318.6 | 66.7 | 2  | K.GHFGPINSVAFHPDGK.S                                                                 |

|               |                     |        |        |         |          |         |                                                                         |        |      |    |                                       |
|---------------|---------------------|--------|--------|---------|----------|---------|-------------------------------------------------------------------------|--------|------|----|---------------------------------------|
| *             | HsFLAG-Lin9_Ti_20   | 3.1779 | 0.3139 | 1983.63 | 1983.143 | 7677.5  | 1                                                                       | 766.8  | 57.1 | 1  | R.IHYFDPQYFEFEFEA.-                   |
| gi NTAP-BHD   | 11                  | 95     | 13.10% | 651     | 72628    | 6.2     | N-terminal TAP-tagged BHD Mutant [Homo sapiens]                         |        |      |    |                                       |
| gi NTAP-BHD   | 11                  | 95     | 11.10% | 768     | 85705    | 6.4     | N-terminal TAP-tagged BHD WT [Homo sapiens]                             |        |      |    |                                       |
|               | HsSrcap_Ti_202.368  | 4.3431 | 0.2429 | 2382.86 | 2382.61  | 6572.8  | 1                                                                       | 956.2  | 55.3 | 13 | K.DQQSAFYEILNMPNLNEAQR.N              |
|               | HsScrap_Ti_102.366  | 6.3388 | 0.3791 | 2384.55 | 2382.61  | 5229    | 1                                                                       | 1447.2 | 47.4 | 8  | K.DQQSAFYEILNMPNLNEAQR.N              |
|               | HsScrap_Ti_102.185  | 2.7054 | 0.1778 | 908.26  | 907.057  | 3615.2  | 8                                                                       | 763.3  | 92.9 | 2  | R.NGFIQSLK.D                          |
|               | HsScrap_Ti_103.247  | 5.2468 | 0.2521 | 2347.83 | 2349.56  | 7562.3  | 1                                                                       | 1687.4 | 41.7 | 15 | R.NGFIQSLKDDPSQSTNVLGEAK.K            |
|               | HsSrcap_Ti_202.220  | 5.1087 | 0.3311 | 2348.56 | 2349.56  | 4724.8  | 1                                                                       | 914.2  | 57.1 | 8  | R.NGFIQSLKDDPSQSTNVLGEAK.K            |
|               | HsScrap_Ti_102.167  | 3.9226 | 0.2787 | 1461.51 | 1461.525 | 4346.8  | 1                                                                       | 912.3  | 76.9 | 3  | K.DDPSQSTNVLGEAK.K                    |
|               | HsScrap_Ti_102.362  | 4.0728 | 0.2988 | 2480.5  | 2481.699 | 4673.1  | 1                                                                       | 521.5  | 50   | 11 | K.EQQNAFYEILNMPNLNEEQR.N              |
|               | HsSrcap_Ti_203.237  | 5.0704 | 0.3913 | 2362.75 | 2363.587 | 4433.1  | 3                                                                       | 505.7  | 47.6 | 16 | R.NGFIQSLKDDPSQSANLLSEAK.K            |
|               | HsScrap_Ti_104.246  | 5.6128 | 0.3933 | 2363.48 | 2363.587 | 6885.7  | 1                                                                       | 1475.4 | 41.7 | 16 | R.NGFIQSLKDDPSQSANLLSEAK.K            |
|               | HsSrcap_Ti_203.215  | 5.381  | 0.2702 | 2492.09 | 2491.761 | 8946.3  | 1                                                                       | 1419.6 | 35.2 | 1  | R.NGFIQSLKDDPSQSANLLSEAK.L            |
|               | HsScrap_Ti_102.182  | 2.8932 | 0.1625 | 1477.91 | 1475.552 | 7373.3  | 1                                                                       | 1128.3 | 73.1 | 2  | K.DDPSQSANLLSEAK.K                    |
| gi 14249500 r | 1                   | 2      | 13.10% | 260     | 29157    | 6.9     | transforming growth factor beta regulator 1 [Homo sapiens]              |        |      |    |                                       |
| *             | HsFLAG-TCF3_Ti_10   | 3.924  | 0.3051 | 3666.3  | 3666.903 | 4210.7  | 1                                                                       | 385.8  | 22.7 | 2  | K.DGGVQPQFEIVPEDDPQNAIVSSADACHAELLR.T |
| gi 47271443 r | 3                   | 15     | 13.10% | 221     | 25476    | 11.9    | splicing factor, arginine/serine-rich 2 [Homo sapiens]                  |        |      |    |                                       |
| *             | HsFLAG-FLJ20729_    | 3.0934 | 0.2926 | 1909.6  | 1909.053 | 7729.5  | 4                                                                       | 729.6  | 50   | 1  | K.RDAEDAMDAMDGAVLDGR.E                |
| *             | HsFLAG-p53-DNA-D    | 5.3012 | 0.3851 | 1753.24 | 1752.865 | 9310.6  | 1                                                                       | 2028.3 | 68.8 | 4  | R.DAEDAMDAMDGAVLDGR.E                 |
| *             | HsFLAG-ARP5_Ti_10   | 3.1604 | 0.2464 | 1309.53 | 1309.387 | 4568.6  | 1                                                                       | 584    | 70   | 10 | R.YGRPPDSHHSR.R                       |
| gi 13904866 r | 3                   | 8      | 13.10% | 137     | 15747    | 12      | ribosomal protein L28 [Homo sapiens]                                    |        |      |    |                                       |
| *             | HsFLAG-TCF3_Ti_10   | 1.9584 | 0.1619 | 872.54  | 873.002  | 4124.9  | 9                                                                       | 244.9  | 83.3 | 1  | R.YNGLIHR.K                           |
| *             | HsFLAG-ARP6_Ti_10   | 3.032  | 0.2917 | 873.81  | 873.002  | 5590    | 2                                                                       | 733.8  | 91.7 | 2  | R.YNGLIHR.K                           |
| *             | HsFLAG-ARP6_Ti_10   | 2.4184 | 0.1679 | 1043.38 | 1044.15  | 4775.2  | 1                                                                       | 609.4  | 70   | 5  | K.TVGVEPADGK.G                        |
| gi 4505257 re | 6                   | 11     | 13.00% | 577     | 67820    | 6.4     | moesin [Homo sapiens]                                                   |        |      |    |                                       |
| *             | HsFlag-VPS71_Ti_10  | 3.5815 | 0.3698 | 2082.51 | 2083.259 | 6009.5  | 1                                                                       | 804.4  | 59.4 | 1  | K.FYPEDVSEELIQDITQR.L                 |
| *             | HsFlag-VPS71_Ti_10  | 3.7341 | 0.3523 | 2868.55 | 2868.176 | 3637.9  | 1                                                                       | 495.1  | 44   | 2  | K.EGILNDDIYCPPETAVLLASYAVQSK.Y        |
|               | HsFLAG-p53-DNA-D    | 2.5927 | 0.1817 | 1105.13 | 1105.282 | 3983.4  | 2                                                                       | 598.4  | 87.5 | 1  | K.IGFPWSEIR.N                         |
|               | HsFLAG-p53-DNA-D    | 3.082  | 0.2462 | 1310.92 | 1311.526 | 4859.6  | 1                                                                       | 673.5  | 75   | 2  | K.KAPDFVFYAPR.L                       |
|               | HsFlag-VPS71_Ti_10  | 4.0952 | 0.4189 | 1184.54 | 1183.352 | 5649.2  | 1                                                                       | 979.7  | 83.3 | 2  | K.APDFVFYAPR.L                        |
|               | HsFlag-VPS71_Ti_10  | 3.4434 | 0.2393 | 1473.57 | 1473.731 | 4190    | 1                                                                       | 702.4  | 81.8 | 3  | R.RKPDTIEVQQMK.A                      |
| gi 4557809 re | 5                   | 13     | 13.00% | 439     | 48535    | 7       | ornithine aminotransferase precursor [Homo sapiens]                     |        |      |    |                                       |
| *             | Hs293Flag-les2_Ti_1 | 3.8204 | 0.2535 | 1956.4  | 1954.143 | 5945.2  | 1                                                                       | 699.8  | 60   | 3  | R.AFYNNVLGEYEEYITK.L                  |
| *             | HsFLAG-KIAA0515_    | 3.4431 | 0.2104 | 1238.41 | 1238.434 | 6204    | 1                                                                       | 1387.8 | 90   | 1  | K.IVFAAGNFWGR.T                       |
| *             | HsFLAG-TCF3_Ti_10   | 5.4684 | 0.4567 | 2142.27 | 2142.368 | 12061.5 | 1                                                                       | 2744.9 | 63.2 | 7  | R.VAIAALEVLEEEENLAENADK.L             |
| *             | HsFLAG-KIAA0515_    | 1.8843 | 0.1341 | 1056.45 | 1057.235 | 4284.5  | 8                                                                       | 247.3  | 61.1 | 1  | K.LPSDVVTAVR.G                        |
| *             | HsFLAG-KIAA0515_    | 3.2529 | 0.2732 | 1057.52 | 1057.235 | 4965.6  | 2                                                                       | 1041.2 | 88.9 | 1  | K.LPSDVVTAVR.G                        |
| gi 23238211 r | 2                   | 2      | 13.00% | 300     | 34333    | 7.3     | actin related protein 2/3 complex subunit 2 [Homo sapiens]              |        |      |    |                                       |
| gi 5031599 re | 2                   | 2      | 13.00% | 300     | 34333    | 7.3     | actin related protein 2/3 complex subunit 2 [Homo sapiens]              |        |      |    |                                       |
|               | HsFLAG-Lin9_Ti_20   | 4.2315 | 0.3375 | 3249.05 | 3246.644 | 8090.3  | 1                                                                       | 1213.1 | 30.4 | 1  | K.RVYGSFLVNPESGYNVSLLYDLENLPASK.D     |
|               | HsFLAG-ARP6_Ti_10   | 2.5474 | 0.1901 | 1217.27 | 1217.29  | 5897.8  | 1                                                                       | 662.2  | 72.2 | 1  | R.DDETMVYESK.K                        |
| gi 5031931 re | 2                   | 7      | 13.00% | 215     | 23384    | 4.6     | nascent-polypeptide-associated complex alpha polypeptide [Homo sapiens] |        |      |    |                                       |
| *             | HsFLAG-ARP6_Ti_10   | 4.3592 | 0.2101 | 1551.64 | 1550.882 | 6937.8  | 1                                                                       | 1249.4 | 75   | 6  | K.NILFVITKPDVYK.S                     |

|                    |                    |        |        |         |          |        |   |        |      |   |                                                                            |
|--------------------|--------------------|--------|--------|---------|----------|--------|---|--------|------|---|----------------------------------------------------------------------------|
| *<br>gi 7706499 re | HsFLAG-FLJ20729_1  | 4.7271 | 0.2213 | 1614.55 | 1615.781 | 9896.9 | 2 | 2393.6 | 78.6 | 1 | K.IEDLSQQAQLAAAEK.F                                                        |
|                    |                    | 1      | 2      | 13.00%  | 108      | 12320  |   |        |      |   | 7.8 DNA directed RNA polymerase III polypeptide K [Homo sapiens]           |
| *<br>gi 4885399 re | HsSrcap_Ti_205.181 | 4.2586 | 0.4263 | 1753.59 | 1753.887 | 4974.9 | 1 | 835    | 73.1 | 2 | R.FACNTCPYVHNITR.K                                                         |
|                    |                    | 11     | 27     | 12.90%  | 1217     | 141541 |   |        |      |   | 7.2 chondroitin sulfate proteoglycan 6 (bamacan) [Homo sapiens]            |
| *<br>*             | HsFlag-VPS71_Ti_10 | 2.0702 | 0.2147 | 794.68  | 794.932  | 5149.3 | 2 | 537.9  | 83.3 | 1 | K.HNVIVGR.N                                                                |
| *<br>*             | HsFLAG-ARP6_Ti_1   | 3.1646 | 0.274  | 1164.31 | 1164.35  | 4976.6 | 1 | 787.6  | 75   | 3 | R.LALLHEGTGPR.V                                                            |
| *<br>*             | HsARP6-FLAG_Ti_1   | 3.8063 | 0.3542 | 1553.34 | 1553.73  | 10954  | 1 | 1330   | 65.4 | 2 | K.NDVMNLLSESAGFSR.S                                                        |
| *<br>*             | HsFlag-DPCD_Ti_20  | 3.7853 | 0.3442 | 1857.69 | 1858.015 | 7505.8 | 1 | 1006.7 | 64.3 | 1 | R.ALEYTIYNQELNETR.A                                                        |
| *<br>*             | HsFLAG-FLJ20729_1  | 3.9217 | 0.4006 | 1760.27 | 1760.96  | 8004.6 | 1 | 997.2  | 63.3 | 3 | R.SLQSLEASLHAMESTR.E                                                       |
| *<br>*             | HsFLAG-FLJ20729_1  | 5.7336 | 0.4593 | 1860.4  | 1861.056 | 7445.3 | 1 | 1980.5 | 75   | 8 | K.AELGTDLLSLSLEDQK.R                                                       |
| *<br>*             | HsFlag-VPS71_Ti_10 | 3.6769 | 0.2906 | 2064.89 | 2065.239 | 8466.3 | 1 | 621.1  | 42.1 | 2 | R.ETEGGTVLTATTSELEINK.R                                                    |
| *<br>*             | HsFlag-VPS71_Ti_10 | 3.713  | 0.2668 | 1619.55 | 1617.842 | 8351.5 | 1 | 806.5  | 57.7 | 2 | K.IRELGSLPQEAFEK.Y                                                         |
| *<br>*             | HsFLAG-Lin9_Ti_20  | 3.6988 | 0.3818 | 1966.42 | 1966.115 | 3926   | 1 | 359.2  | 50   | 2 | R.GSGSQSSVPSVDQFTGVGIR.V                                                   |
| *<br>*             | HsARP6-FLAG_Ti_1   | 3.2402 | 0.2558 | 1387.93 | 1387.749 | 8489.5 | 1 | 1155.8 | 66.7 | 1 | K.SLVALALIFAIQK.C                                                          |
| *<br>gi 4758410 re | HsFLAG-ARP6_Ti_1   | 2.2757 | 0.2002 | 1135.22 | 1136.117 | 6053.2 | 4 | 454.8  | 61.1 | 2 | K.DFVEDDTHG.-                                                              |
|                    |                    | 6      | 18     | 12.90%  | 673      | 74128  |   |        |      |   | 6.1 fragile X mental retardation syndrome related protein 2 [Homo sapiens] |
| *<br>*             | HsARP6-FLAG_Ti_1   | 3.4906 | 0.313  | 1320.42 | 1320.578 | 7604.2 | 1 | 1124.5 | 72.7 | 6 | R.LRPVNPPLATK.G                                                            |
| *<br>*             | HsFLAG-ARP6_Ti_1   | 4.8261 | 0.3789 | 1996.31 | 1996.249 | 5795.8 | 1 | 945.8  | 58.3 | 3 | R.EDLMGLAIGTHGANIQQAR.K                                                    |
| *<br>*             | HsFLAG-ARP6_Ti_1   | 4.9606 | 0.4353 | 1879.36 | 1880.071 | 6191.9 | 1 | 1232.5 | 68.8 | 4 | K.VPGVTAIELGEETCTFR.I                                                      |
| *<br>*             | HsFLAG-ARP6_Ti_1   | 3.1526 | 0.3306 | 1656.28 | 1656.789 | 4783.8 | 1 | 818.4  | 73.1 | 2 | R.SYLEFSEDSVQVPR.N                                                         |
| *<br>*             | HsFLAG-FLJ20309_1  | 2.4912 | 0.0894 | 944.53  | 944.116  | 6753.9 | 7 | 655    | 71.4 | 1 | K.VIQEIVDK.S                                                               |
| *<br>gi 4503607 re | HsFLAG-ARP6_Ti_1   | 4.767  | 0.5311 | 1756.51 | 1756.78  | 8282.4 | 1 | 1279.1 | 59.4 | 2 | K.AGYSTDESSSSSLHATR.T                                                      |
|                    |                    | 2      | 3      | 12.90%  | 333      | 35080  |   |        |      |   | 8.4 electron transfer flavoprotein, alpha polypeptide [Homo sapiens]       |
| *<br>*             | HsFLAG-p53-DNA-D   | 3.8034 | 0.2288 | 2352.15 | 2352.841 | 6949.8 | 1 | 1213.8 | 50   | 1 | K.IVAPELYIAVGISGAIQHLAGMK.D                                                |
| *<br>gi 5454052 re | HsFLAG-ARP6_Ti_1   | 3.988  | 0.3608 | 2209.92 | 2209.503 | 8357.4 | 1 | 905.3  | 47.4 | 2 | K.DPEAPIFQVADYGIVADLFK.V                                                   |
|                    |                    | 2      | 3      | 12.90%  | 248      | 27774  |   |        |      |   | 4.7 stratifin [Homo sapiens]                                               |
| *<br>*             | HsFlag-VPS71_Ti_10 | 4.0381 | 0.3033 | 2441.1  | 2440.763 | 6228   | 1 | 857.4  | 33.3 | 1 | K.VETELQGVCDTVLGLLDSHLIK.E                                                 |
| *<br>gi 11321591 r | HsFLAG-FLJ20729_1  | 3.7624 | 0.1371 | 1189.5  | 1190.444 | 6163.6 | 5 | 1616.1 | 88.9 | 2 | K.DSTLIMQLLR.D                                                             |
|                    |                    | 3      | 6      | 12.90%  | 209      | 24034  |   |        |      |   | 7.8 high-mobility group box 2 [Homo sapiens]                               |
| *<br>*             | HsFLAG-p53-DNA-D   | 3.7878 | 0.3699 | 1553.62 | 1553.756 | 4959.5 | 1 | 762.2  | 67.9 | 3 | K.IKSEHPGLSIGDTAK.K                                                        |
| *<br>*             | HsFLAG-Lin9_Ti_20  | 3.5049 | 0.3665 | 1312.32 | 1312.422 | 4348.1 | 1 | 715.5  | 75   | 1 | K.SEHPGLSIGDTAK.K                                                          |
| *<br>gi 24432106 r | HsFLAG-p53-DNA-D   | 3.6653 | 0.3346 | 1394.37 | 1394.585 | 7357.2 | 1 | 1304.4 | 77.3 | 2 | K.KLGEMWSEQSAK.D                                                           |
|                    |                    | 8      | 22     | 12.80%  | 923      | 102902 |   |        |      |   | 5.2 p30 DBC protein [Homo sapiens]                                         |
| gi 40548408 r      |                    | 8      | 22     | 12.80%  | 923      | 102902 |   |        |      |   | 5.2 p30 DBC protein [Homo sapiens]                                         |
|                    | HsFLAG-FLJ20729_1  | 4.2135 | 0.4765 | 1499.51 | 1499.797 | 4189.3 | 1 | 860.1  | 78.6 | 7 | K.SPAPPLHVAALGQK.Q                                                         |
|                    | HsYL1_Ti_101.1814. | 4.9035 | 0.4677 | 2165.02 | 2164.244 | 4871.6 | 1 | 1556.6 | 71.4 | 2 | K.EAAPDAGAEPITADSDPAYSSK.V                                                 |
|                    | HsYL1_Ti_102.2591. | 2.5197 | 0.1255 | 1589.92 | 1589.872 | 4617.7 | 1 | 484.5  | 61.5 | 1 | K.VLLLSSPGLEELYR.C                                                         |
|                    | HsFLAG-FLJ20729_1  | 3.2922 | 0.4352 | 1610.04 | 1610.694 | 5217.9 | 1 | 503.5  | 64.3 | 2 | R.CAQAQTGIDLSGCTK.W                                                        |
|                    | HsFLAG-UTX1_Ti_20  | 3.7896 | 0.3791 | 1550.62 | 1550.757 | 4657.2 | 1 | 937    | 75   | 6 | R.FAEFQYLQPGPPR.R                                                          |
|                    | HsYL1_Ti_102.3568. | 3.9246 | 0.3942 | 2605.13 | 2605.948 | 4489.8 | 1 | 519.4  | 43.8 | 2 | R.QEGLDGGLPEEVFLGNLDLLPPPGK.S                                              |
|                    | HsFLAG-FLJ20729_1  | 3.5073 | 0.2648 | 2606.25 | 2605.948 | 7435.3 | 6 | 600.9  | 27.1 | 1 | R.QEGLDGGLPEEVFLGNLDLLPPPGK.S                                              |
|                    | HsYL1_Ti_101.1751. | 3.046  | 0.2123 | 1560.17 | 1559.629 | 4590.5 | 1 | 666.8  | 61.5 | 1 | K.ADSWVEKEEPAPSN.-                                                         |
| gi 11225260 r      |                    | 7      | 21     | 12.80%  | 765      | 90726  |   |        |      |   | 9.3 DNA topoisomerase I [Homo sapiens]                                     |

|               |                    |        |        |         |          |         |   |        |      |                                                                    |
|---------------|--------------------|--------|--------|---------|----------|---------|---|--------|------|--------------------------------------------------------------------|
| *             | HsFLAG-p53-DNA-D   | 3.4593 | 0.2418 | 1318.4  | 1318.467 | 7134.3  | 1 | 1356.9 | 90   | 1 R.KLEEEEDGKLK.K                                                  |
| *             | HsFLAG-p53-DNA-D   | 3.3553 | 0.26   | 1755.63 | 1755.023 | 4133.4  | 1 | 683.2  | 66.7 | 6 K.GPVFAPPYEPLPENVK.F                                             |
| *             | HsFLAG-p53-DNA-D   | 4.607  | 0.1481 | 2831.56 | 2829.138 | 9953.5  | 1 | 1560.6 | 34.8 | 1 R.VEHINLHPELDGQEYVVEFDLFGK.D                                     |
| *             | HsFlag-VPS71_Ti_10 | 3.9785 | 0.2856 | 1356.96 | 1356.58  | 5593.8  | 1 | 1143.2 | 81.8 | 3 K.HLQDLMEGLTAK.V                                                 |
| *             | HsFLAG-Lin9_Ti_20  | 3.6993 | 0.3266 | 1508.51 | 1508.715 | 7117.3  | 1 | 1006.5 | 70.8 | 1 R.TYNASITLQQQLK.E                                                |
| *             | HsFLAG-Lin9_Ti_20  | 3.6144 | 0.3025 | 1181.54 | 1182.334 | 6800.5  | 1 | 1354.7 | 88.9 | 7 R.AVAILCNHQR.A                                                   |
| *             | HsFLAG-p53-DNA-D   | 3.5534 | 0.1797 | 1432.28 | 1432.53  | 7327.7  | 3 | 853.3  | 72.7 | 2 K.LEVQATDREENK.Q                                                 |
| gij7662645 re |                    | 1      | 2      | 12.80%  | 258      | 29396   |   |        |      | 9.4 mitochondrial ribosomal protein S18B [Homo sapiens]            |
| *             | HsFlag-NUFIP_Ti_10 | 4.9038 | 0.357  | 3663.77 | 3665.012 | 5470.6  | 1 | 541.9  | 25.8 | 2 R.DLDFSTSHGAVSATPPAPTLVSGDPWYPWYNWK.Q                            |
| gij4506903 re |                    | 2      | 3      | 12.70%  | 221      | 25542   |   |        |      | 8.6 splicing factor, arginine/serine-rich 9 [Homo sapiens]         |
| *             | HsFLAG-ARP6_Ti_10  | 3.2952 | 0.4021 | 1683.57 | 1683.945 | 2902.6  | 2 | 368.5  | 63.3 | 1 R.VLVSGLPPSGSWQDLK.D                                             |
| *             | HsFlag-NUFIP_Ti_10 | 2.9403 | 0.2444 | 1455.36 | 1455.615 | 6035.7  | 1 | 812.8  | 72.7 | 2 R.GSPHYFSPFRPY.-                                                 |
| gij19923217 r |                    | 23     | 56     | 12.60%  | 3256     | 358747  |   |        |      | 9.4 antigen identified by monoclonal antibody Ki-67 [Homo sapiens] |
| *             | HsYL1_Ti_101.1210. | 2.9658 | 0.1927 | 1090.38 | 1090.175 | 4521.3  | 2 | 1023.2 | 77.8 | 2 R.DVESVQTPSK.A                                                   |
| *             | HsFLAG-ARP6_Ti_20  | 3.5275 | 0.3165 | 1632.45 | 1633.758 | 6615.4  | 1 | 894.2  | 69.2 | 4 K.TPVQYSQQQNSPQK.H                                               |
| *             | HsFLAG-FLJ20729_   | 3.7808 | 0.2431 | 2159.8  | 2160.343 | 8498.1  | 5 | 847.8  | 31.2 | 1 R.TPAKVEDAADSATKPENLSSK.T                                        |
| *             | HsYL1_Ti_102.3015. | 3.5812 | 0.2457 | 3681.24 | 3681.029 | 5219.1  | 4 | 365.2  | 22.9 | 1 K.LGTTAGQMC SGLPGLSSVDINNF GDSINESEGIPLK.R                       |
| *             | HsFlag-DPCD_Ti_20  | 3.7879 | 0.1938 | 1420.15 | 1420.652 | 5446.5  | 1 | 708    | 65.4 | 9 K.AQSLVISPPAPSPR.K                                               |
| *             | HsFLAG-FLJ20729_   | 5.0021 | 0.4042 | 2664.91 | 2665.975 | 10393   | 1 | 1273.5 | 32.3 | 2 K.KPVGEVHSQFSTGHANSPCTIIGK.A                                     |
| *             | HsFLAG-FLJ20309_   | 3.9919 | 0.3157 | 1666.27 | 1665.801 | 8430.6  | 1 | 1505.7 | 73.1 | 3 K.SEETNTEIVECILK.R                                               |
| *             | HsFLAG-FLJ20309_   | 3.2404 | 0.1184 | 1353.14 | 1353.478 | 8088.8  | 9 | 706.4  | 63.6 | 2 R.GQNLLQTQDHAK.A                                                 |
| *             | HsFLAG-UTX1_Ti_20  | 4.246  | 0.4207 | 1764.02 | 1763.942 | 5102.3  | 1 | 991.6  | 66.7 | 6 R.TPKEEAQSLEDLAGFK.E                                             |
| *             | HsFlag-VPS71_Ti_10 | 2.6802 | 0.1899 | 1316.37 | 1315.527 | 5072.2  | 2 | 570.1  | 70.8 | 1 K.AMLTPKPAGGDEK.D                                                |
| *             | HsFLAG-p53-DNA-D   | 4.1285 | 0.3245 | 2973.74 | 2972.324 | 7598.5  | 1 | 711.4  | 27.8 | 1 K.AQALEDLAGFKELFQTPGHTEELVAAGK.T                                 |
| *             | HsFLAG-UTX1_Ti_20  | 3.4576 | 0.3892 | 1828.04 | 1828.032 | 3310.8  | 1 | 419.6  | 59.4 | 2 K.ELFQTPGHTEELVAAGK.T                                            |
| *             | HsFLAG-Lin9_Ti_20  | 4.4054 | 0.3397 | 1945.69 | 1946.041 | 6898.2  | 1 | 1043.9 | 58.8 | 1 K.IPCDSPQSDPVDTPSTK.Q                                            |
| *             | HsFLAG-Lin9_Ti_20  | 3.901  | 0.3992 | 1785.42 | 1785.951 | 4586.1  | 1 | 687.2  | 62.5 | 4 K.ELFQTPGHTEELVAAGK.T                                            |
| *             | HsFlag-DPCD_Ti_20  | 3.3972 | 0.3806 | 1798.69 | 1799.932 | 6032.2  | 1 | 591.1  | 53.1 | 2 R.SQPDPVDTPSTSKPQSK.R                                            |
| *             | HsFLAG-p53-DNA-D   | 3.8382 | 0.332  | 2098.6  | 2099.175 | 10253.5 | 1 | 995.4  | 50   | 3 K.LTQTSGETTHTHTTEPTGDGK.S                                        |
| *             | HsFlag-VPS71_Ti_10 | 4.4211 | 0.4381 | 2347.59 | 2346.599 | 7295.6  | 1 | 1038.9 | 52.5 | 2 K.SEVPEDLAGFIELFQTPSHTK.E                                        |
| *             | HsFLAG-UTX1_Ti_20  | 2.9756 | 0.2722 | 1897.3  | 1897.092 | 7006.9  | 4 | 470.2  | 44.1 | 3 R.ASQPDLVDTPSTSKPQPK.R                                           |
| *             | HsFLAG-BC014022_   | 3.1056 | 0.2983 | 1395.16 | 1395.617 | 6301.2  | 1 | 718    | 66.7 | 1 K.AMHTPKPAVGEEK.D                                                |
| *             | HsFlag-DPCD_Ti_20  | 2.9315 | 0.2745 | 1268.11 | 1268.372 | 5240.7  | 4 | 707.7  | 72.7 | 1 K.LDQPGNLPGSNR.R                                                 |
| *             | HsYL1_Ti_105.1662. | 3.2944 | 0.4554 | 1925.15 | 1925.192 | 5127.1  | 1 | 606.9  | 55.9 | 2 R.SPQPDPVGTPTIFKPQSK.R                                           |
| *             | HsFlag-DPCD_Ti_20  | 3.403  | 0.2715 | 1945.82 | 1945.14  | 5223    | 1 | 534.6  | 50   | 1 K.IPCESPPELVDTTASTK.R                                            |
| *             | HsFLAG-Lin9_Ti_20  | 4.5761 | 0.3445 | 3758.12 | 3760.019 | 10225.4 | 1 | 905.5  | 22.1 | 2 K.AQPLEDLASFQELSQTPGHTEELANGAADSFTSAPK.Q                         |
| gij4503337 re |                    | 5      | 22     | 12.60%  | 514      | 57674   |   |        |      | 9.4 dyskerin [Homo sapiens]                                        |
| *             | HsFLAG-Lin9_Ti_20  | 3.9701 | 0.2446 | 2469    | 2468.775 | 6702.9  | 1 | 581.4  | 45.2 | 1 R.TGFINDKPSNPSSHEVVAWIR.R                                        |
| *             | HsFLAG-ARP6_Ti_10  | 2.9046 | 0.2578 | 1579.61 | 1579.756 | 10413.2 | 2 | 672.9  | 53.8 | 1 K.PSNPSSHEVVAWIR.R                                               |
| *             | HsFLAG-Lin9_Ti_20  | 3.7466 | 0.1229 | 1396.33 | 1396.546 | 7255.8  | 1 | 1244.5 | 75   | 6 R.LHNAIEGGTQLSR.A                                                |
| *             | HsFlag-NUFIP_Ti_11 | 5.5776 | 0.4127 | 2109.35 | 2110.548 | 6564.7  | 1 | 1121.7 | 57.9 | 10 R.ALETLTGALFQRPLIAAVK.R                                         |
| *             | HsFlag-VPS71_Ti_10 | 2.7651 | 0.3213 | 983.52  | 984.14   | 7434.2  | 1 | 844.3  | 72.2 | 4 K.APQVVAEAAK.T                                                   |
| gij55741709 r |                    | 6      | 15     | 12.50%  | 843      | 100186  |   |        |      | 6.3 RNA binding motif protein 25 [Homo sapiens]                    |

|               |                    |        |        |         |          |        |                                                                     |        |      |   |                                         |
|---------------|--------------------|--------|--------|---------|----------|--------|---------------------------------------------------------------------|--------|------|---|-----------------------------------------|
| *             | HsFlag-VPS71_Ti_1( | 3.6605 | 0.3787 | 2076.76 | 2076.279 | 7962.2 | 1                                                                   | 547.3  | 46.9 | 2 | K.LQAFGFCEYKEPESTLR.A                   |
| *             | HsFlag-VPS71_Ti_1( | 2.6884 | 0.1083 | 1165.65 | 1166.363 | 5916.1 | 7                                                                   | 638.2  | 66.7 | 1 | R.LLHDLQIGEK.K                          |
| *             | HsFLAG-Lin9_Ti_20% | 3.4653 | 0.314  | 2032.55 | 2034.06  | 5734.4 | 1                                                                   | 441    | 47.1 | 3 | R.EYSSELNAPSQESDShPR.K                  |
| *             | HsFlag-VPS71_Ti_1( | 3.3072 | 0.2638 | 1356.43 | 1356.478 | 5036.6 | 1                                                                   | 559.1  | 61.5 | 4 | K.LGASNSPGQPNSVK.R                      |
| *             | HsFLAG-p53-DNA-D   | 5.1448 | 0.4694 | 2451.73 | 2452.637 | 8096.2 | 1                                                                   | 1189.2 | 55   | 1 | K.KLPVDSVFNFKEDESDVPR.K                 |
| *             | HsFlag-VPS71_Ti_1( | 4.4809 | 0.2976 | 2909.37 | 2906.41  | 7395.1 | 1                                                                   | 1120.7 | 33.3 | 4 | K.IPTAKPELFAYPLDWSIVDSILMER.R           |
| gi 5031957 re | 1                  | 3      | 12.50% | 265     | 30472    | 6.3    | polyglutamine binding protein 1 isoform 1 [Homo sapiens]            |        |      |   |                                         |
| gi 74027259 r | 1                  | 3      | 22.10% | 149     | 17183    | 5.5    | polyglutamine binding protein 1 isoform 2 [Homo sapiens]            |        |      |   |                                         |
| gi 74027257 r | 1                  | 3      | 12.50% | 265     | 30472    | 6.3    | polyglutamine binding protein 1 isoform 1 [Homo sapiens]            |        |      |   |                                         |
| gi 74027255 r | 1                  | 3      | 12.50% | 265     | 30472    | 6.3    | polyglutamine binding protein 1 isoform 1 [Homo sapiens]            |        |      |   |                                         |
| gi 74027253 r | 1                  | 3      | 12.50% | 265     | 30472    | 6.3    | polyglutamine binding protein 1 isoform 1 [Homo sapiens]            |        |      |   |                                         |
| gi 74027247 r | 1                  | 3      | 12.50% | 265     | 30472    | 6.3    | polyglutamine binding protein 1 isoform 1 [Homo sapiens]            |        |      |   |                                         |
|               | HsFLAG-Lin9_Ti_20% | 4.3117 | 0.397  | 3782.01 | 3782.123 | 4239.3 | 1                                                                   | 479.9  | 25   | 3 | K.VFDPSCGLPYYWNADTDLVSWLSPHDPNSVVTK.S   |
| gi 5453555 re | 2                  | 5      | 12.50% | 216     | 24423    | 7.5    | ras-related nuclear protein [Homo sapiens]                          |        |      |   |                                         |
| *             | HsFLAG-FLJ20729_   | 2.7472 | 0.082  | 1516.42 | 1516.71  | 5103.3 | 7                                                                   | 536.8  | 62.5 | 1 | R.VCENIPIVLCGNK.V                       |
| *             | HsFLAG-p53-DNA-D   | 3.6988 | 0.3978 | 1785.53 | 1786.043 | 4801.9 | 1                                                                   | 599.4  | 61.5 | 4 | K.SNYNFEKPFLLWLAR.K                     |
| gi 18702323 r | 1                  | 2      | 12.50% | 96      | 10855    | 7.5    | dynein, cytoplasmic, light polypeptide 2B [Homo sapiens]            |        |      |   |                                         |
| gi 7661822 r  | 1                  | 2      | 12.50% | 96      | 10922    | 7.2    | Roadblock-1 [Homo sapiens]                                          |        |      |   |                                         |
| gi 29570775 r | 1                  | 2      | 19.00% | 63      | 7342     | 7.3    | cytoplasmic dynein light chain 2A isoform b [Homo sapiens]          |        |      |   |                                         |
|               | HsARP6-FLAG_Ti_1(  | 3.7978 | 0.3437 | 1447.38 | 1447.588 | 5986.7 | 1                                                                   | 969.6  | 81.8 | 2 | R.DIDPQNDLTFLR.I                        |
| gi 11321601 r | 6                  | 14     | 12.40% | 784     | 85596    | 7.6    | phosphofructokinase, platelet [Homo sapiens]                        |        |      |   |                                         |
| *             | HsFLAG-ARP6_Ti_1(  | 3.7781 | 0.2675 | 1822.05 | 1821.123 | 7523.2 | 1                                                                   | 810.2  | 60.7 | 1 | R.LPLMECVQMTQDVQK.A                     |
| *             | HsFLAG-FLJ20729_   | 3.9618 | 0.4113 | 2120.44 | 2120.326 | 9280.5 | 1                                                                   | 821.6  | 45   | 2 | K.EIGWTDVGGWTGQGGSSILGTK.R              |
| *             | HsFLAG-ARP6_Ti_1(  | 3.0837 | 0.1155 | 1255.04 | 1254.444 | 6935.5 | 1                                                                   | 1535.8 | 88.9 | 1 | K.YLEEIATQMR.T                          |
| *             | HsFLAG-ARP6_Ti_1(  | 5.3953 | 0.4058 | 2677.21 | 2678.745 | 8130.8 | 1                                                                   | 1119   | 47.6 | 1 | R.NESCSENYTTDFIYQLYSEEGK.G              |
| *             | HsFLAG-ARP6_Ti_1   | 4.7619 | 0.4345 | 1812.42 | 1812.013 | 8706.6 | 1                                                                   | 1546   | 68.8 | 5 | K.NVLGHMQGGGAPSPFDR.N                   |
| *             | HsFLAG-Lin9_Ti_20% | 3.9006 | 0.2864 | 1413.96 | 1414.691 | 5869.5 | 1                                                                   | 841    | 72.7 | 4 | K.RNVIFQPVAELK.K                        |
| gi 13654270 r | 4                  | 7      | 12.40% | 734     | 83065    | 4.7    | LAS1-like [Homo sapiens]                                            |        |      |   |                                         |
| *             | HsH2AZ-FLAG_293_   | 2.7013 | 0.3055 | 1955.94 | 1957.185 | 9728.2 | 1                                                                   | 697.8  | 50   | 1 | R.ELLSYEEEEQFTVLEK.F                    |
| *             | HsFLAG-Lin9_Ti_20% | 3.8275 | 0.3536 | 1614.53 | 1614.801 | 8692.4 | 1                                                                   | 1491.1 | 73.1 | 3 | R.GLHSQNFTQALLER.M                      |
| *             | HsH2AZ-FLAG_293_   | 4.322  | 0.3785 | 2607.79 | 2608.864 | 6608.8 | 1                                                                   | 1189.5 | 35.9 | 2 | K.SPYTLDSLWYVSKPASSSFGSEAK.A            |
| *             | HsH2AZ-FLAG_293_   | 4.2068 | 0.3121 | 3857.65 | 3857.071 | 7984.2 | 1                                                                   | 994.8  | 24.3 | 1 | K.TDTLGLSCGVGSGNCSNSSSNFEGLLWSQQLHGLK.T |
| gi 38195084 r | 3                  | 7      | 12.40% | 347     | 39899    | 5.7    | HMT1 hnRNP methyltransferase-like 2 isoform 2 [Homo sapiens]        |        |      |   |                                         |
| gi 38195089 r | 3                  | 7      | 11.90% | 361     | 41486    | 5.5    | HMT1 hnRNP methyltransferase-like 2 isoform 1 [Homo sapiens]        |        |      |   |                                         |
| gi 38195087 r | 3                  | 7      | 12.50% | 343     | 39572    | 5.7    | HMT1 hnRNP methyltransferase-like 2 isoform 3 [Homo sapiens]        |        |      |   |                                         |
|               | HsFLAG-p53-DNA-D   | 2.7019 | 0.195  | 1402.84 | 1400.62  | 6116.5 | 8                                                                   | 426    | 59.1 | 1 | K.WLAPDGLIFPDR.A                        |
|               | HsFLAG-TCF3_Ti_1(  | 2.9158 | 0.3156 | 1725.53 | 1725.855 | 4082   | 1                                                                   | 321.8  | 50   | 2 | R.TGFSTSPESPYTHWK.Q                     |
|               | HsFLAG-ARP6_Ti_1(  | 3.5727 | 0.3344 | 1721.25 | 1721.969 | 6598.3 | 1                                                                   | 906.6  | 60   | 4 | K.TGEEIFGTIGMRPNAK.N                    |
| gi 14141157 r | 2                  | 7      | 12.40% | 346     | 36926    | 6.9    | heterogeneous nuclear ribonucleoprotein H3 isoform a [Homo sapiens] |        |      |   |                                         |
| gi 14141159 r | 2                  | 7      | 13.00% | 331     | 35239    | 6.9    | heterogeneous nuclear ribonucleoprotein H3 isoform b [Homo sapiens] |        |      |   |                                         |
|               | HsFLAG-p53-DNA-D   | 4.6244 | 0.4565 | 1919.66 | 1920.132 | 8182.3 | 1                                                                   | 1280.7 | 62.5 | 6 | R.ATENDIANFFSPLNPIR.V                   |
|               | HsFLAG-p53-DNA-D   | 5.4823 | 0.4491 | 2522.46 | 2523.797 | 6810.8 | 1                                                                   | 1315.9 | 54   | 1 | R.YIELFLNSTPGGGSGMGGSGMGGYGR.D          |
| gi 8923444 re | 1                  | 4      | 12.40% | 153     | 17201    | 8.2    | nucleolar protein family A, member 2 isoform a [Homo sapiens]       |        |      |   |                                         |



|             |                     |        |        |         |          |         |   |        |      |     |                                                                                                             |
|-------------|---------------------|--------|--------|---------|----------|---------|---|--------|------|-----|-------------------------------------------------------------------------------------------------------------|
| *           | HsFLAG-p53-DNA-D    | 5.4911 | 0.4021 | 2156.77 | 2156.447 | 10017.4 | 1 | 1863.1 | 61.1 | 4   | R.TYQELLVNQNPQAQPLASR.R                                                                                     |
| gi 51479152 | r                   | 1      | 2      | 12.40%  | 137      | 15773   |   |        |      |     | 7.2 ATP synthase, H <sup>+</sup> transporting, mitochondrial F0 complex, subunit d isoform b [Homo sapiens] |
| gi 5453559  | re                  | 1      | 2      | 10.60%  | 161      | 18491   |   |        |      |     | 5.3 ATP synthase, H <sup>+</sup> transporting, mitochondrial F0 complex, subunit d isoform a [Homo sapiens] |
|             | HsFLAG-ARP6_Ti_1    | 2.6956 | 0.2604 | 1931.61 | 1933.214 | 3938    | 1 | 625.6  | 62.5 | 2   | R.LAALPENPPAIDWAYYK.A                                                                                       |
| gi 50592994 | r                   | 2      | 6      | 12.40%  | 105      | 11737   |   |        |      |     | 4.9 thioredoxin [Homo sapiens]                                                                              |
| *           | HsTIP60_Ti_103.196  | 3.1076 | 0.3549 | 1336.53 | 1337.429 | 10489.5 | 1 | 1192.9 | 62.5 | 2   | K.TAFQEALDAAGDK.L                                                                                           |
| *           | HsFLAG-RPB5MP_2     | 3.9899 | 0.2844 | 1337.06 | 1337.429 | 6833.5  | 1 | 1977.6 | 83.3 | 4   | K.TAFQEALDAAGDK.L                                                                                           |
| gi 48762920 | r                   | 5      | 10     | 12.30%  | 780      | 85018   |   |        |      |     | 7.5 liver phosphofructokinase isoform b [Homo sapiens]                                                      |
| gi 50346005 | r                   | 5      | 10     | 11.60%  | 827      | 90203   |   |        |      |     | 7.8 liver phosphofructokinase isoform a [Homo sapiens]                                                      |
|             | HsFLAG-ARP6_Ti_1    | 3.8002 | 0.2464 | 3103.5  | 3104.459 | 10889.2 | 1 | 1062.1 | 27.6 | 1   | R.AAAYNLVQHGITNLCVIGGDGSLTGANIFR.S                                                                          |
|             | HsFLAG-ARP6_Ti_1    | 4.6352 | 0.0801 | 1914.8  | 1915.172 | 7827.4  | 1 | 996.2  | 56.2 | 1   | R.IMEVIDAITTTAQSHQR.T                                                                                       |
|             | HsFLAG-ARP6_Ti_1    | 3.1065 | 0.2496 | 1008.67 | 1009.197 | 4599.2  | 1 | 1146.6 | 93.8 | 2   | R.VTVLGHVQR.G                                                                                               |
|             | HsFLAG-ARP6_Ti_1    | 4.3465 | 0.4415 | 2145.32 | 2145.485 | 5533.2  | 1 | 1207.5 | 57.1 | 1   | K.SNFSLAILNVGAPAAGMNAAVR.S                                                                                  |
|             | HsFLAG-ARP6_Ti_1    | 5.4219 | 0.3913 | 1908.42 | 1909.112 | 9832.4  | 1 | 2147.3 | 67.6 | 5   | R.TNVLGHLLQGGAPTFFDR.N                                                                                      |
| gi 13236583 | r                   | 3      | 4      | 12.30%  | 316      | 36072   |   |        |      |     | 5.9 BRCA1/BRCA2-containing complex subunit 36 isoform 1 [Homo sapiens]                                      |
| gi 64762484 | r                   | 3      | 4      | 13.40%  | 291      | 33150   |   |        |      |     | 6 BRCA1/BRCA2-containing complex subunit 36 isoform 2 [Homo sapiens]                                        |
|             | HsScrap_Ti_103.204  | 3.7511 | 0.3638 | 1588.4  | 1586.794 | 7656.7  | 1 | 1317.4 | 75   | 2   | R.VLYTCFQSIQAQK.S                                                                                           |
|             | HsScrap_Ti_206.262  | 4.5524 | 0.3616 | 1667.46 | 1667.048 | 7992.3  | 1 | 1034.5 | 64.3 | 1   | R.IEIPHIHVPHTIGK.V                                                                                          |
|             | HsScrap_Ti_102.212  | 2.1343 | 0.1282 | 1244.44 | 1245.425 | 7918.6  | 1 | 840.1  | 70   | 1   | K.VCLESAVELPK.I                                                                                             |
| gi 89058472 | r                   | 2      | 183    | 12.30%  | 106      | 11497   |   |        |      |     | 4.6 PREDICTED: similar to Ig kappa chain V-II region RPMI 6410 precursor [Homo sapiens]                     |
| gi 89066978 | r                   | 2      | 183    | 10.20%  | 127      | 13922   |   |        |      |     | 4.6 PREDICTED: similar to Ig kappa chain V-II region Cum [Homo sapiens]                                     |
| gi 89062133 | r                   | 2      | 183    | 10.30%  | 126      | 13837   |   |        |      |     | 8 PREDICTED: similar to Ig kappa chain V-II region RPMI 6410 precursor [Homo sapiens]                       |
| gi 89059101 | r                   | 2      | 183    | 12.30%  | 106      | 11497   |   |        |      |     | 4.6 PREDICTED: similar to Ig kappa chain V-II region RPMI 6410 precursor [Homo sapiens]                     |
|             | HsFlag-FLJ90652_2   | 4.4294 | 0.3826 | 1303.92 | 1304.399 | 8509.6  | 1 | 1977.6 | 87.5 | 127 | R.FSGSGSGTDFTLK.I                                                                                           |
|             | Hs293Flag-les2_Ti_1 | 3.2749 | 0.2984 | 1305.45 | 1304.399 | 4352.7  | 1 | 464.6  | 66.7 | 56  | R.FSGSGSGTDFTLK.I                                                                                           |
| gi 4503765  | re                  | 5      | 14     | 12.20%  | 632      | 71175   |   |        |      |     | 7.4 fragile X mental retardation 1 [Homo sapiens]                                                           |
| *           | HsFLAG-ARP6_Ti_1    | 4.4716 | 0.2715 | 1555.15 | 1555.595 | 8853.2  | 1 | 2105.4 | 83.3 | 2   | K.DINESDEVEVYSR.A                                                                                           |
|             | HsFLAG-ARP6_Ti_1    | 4.8261 | 0.3789 | 1996.31 | 1996.249 | 5795.8  | 1 | 945.8  | 58.3 | 3   | R.EDLMGLAIGTHGANIQQAR.K                                                                                     |
| *           | HsFLAG-p53-DNA-D    | 3.5632 | 0.3059 | 1650.54 | 1650.872 | 5775.1  | 2 | 641.6  | 57.7 | 4   | R.SFLEFAEDVIQVPR.N                                                                                          |
| *           | HsFLAG-p53-DNA-D    | 3.8648 | 0.3693 | 1477.58 | 1477.53  | 8417.3  | 1 | 1243.5 | 75   | 3   | K.ENSTHFSQPNSTK.V                                                                                           |
| *           | HsFLAG-UTX1_Ti_2    | 4.9636 | 0.4512 | 1841.45 | 1842.143 | 6901.7  | 1 | 1545.9 | 67.6 | 2   | R.VLVASSVVAGESQKPELK.A                                                                                      |
| gi 49472822 | r                   | 2      | 3      | 12.20%  | 320      | 35611   |   |        |      |     | 6.1 eukaryotic translation initiation factor 3, subunit 4 delta, 44kDa [Homo sapiens]                       |
| *           | HsScrap_Ti_103.276  | 3.9344 | 0.3721 | 2464.53 | 2465.849 | 6146.5  | 1 | 595    | 41.7 | 2   | K.GIPLATGDTSPPELLPGAPLPPPK.E                                                                                |
| *           | HsFLAG-ARP6_Ti_1    | 2.9167 | 0.1744 | 1526.03 | 1524.714 | 7471.5  | 2 | 761.4  | 65.4 | 1   | K.LPGELEPVQATQNK.T                                                                                          |
| gi 4502847  | re                  | 1      | 4      | 12.20%  | 172      | 18648   |   |        |      |     | 9.5 cold inducible RNA binding protein [Homo sapiens]                                                       |
| *           | HsFLAG-Lin9_Ti_20   | 5.1081 | 0.4066 | 2349.46 | 2346.599 | 7480.6  | 1 | 1541.5 | 60   | 4   | K.LFVGGLSFDTNEQSLEQVFSK.Y                                                                                   |
| gi 5174659  | re                  | 1      | 2      | 12.20%  | 98       | 11471   |   |        |      |     | 6.2 S100 calcium binding protein A13 [Homo sapiens]                                                         |
| gi 66737374 | r                   | 1      | 2      | 12.20%  | 98       | 11471   |   |        |      |     | 6.2 S100 calcium binding protein A13 [Homo sapiens]                                                         |
| gi 66737372 | r                   | 1      | 2      | 12.20%  | 98       | 11471   |   |        |      |     | 6.2 S100 calcium binding protein A13 [Homo sapiens]                                                         |
| gi 66737370 | r                   | 1      | 2      | 12.20%  | 98       | 11471   |   |        |      |     | 6.2 S100 calcium binding protein A13 [Homo sapiens]                                                         |
| gi 66737368 | r                   | 1      | 2      | 12.20%  | 98       | 11471   |   |        |      |     | 6.2 S100 calcium binding protein A13 [Homo sapiens]                                                         |
|             | HsFlag-VPS71_Ti_1   | 4.1083 | 0.1933 | 1419.61 | 1419.707 | 5686    | 1 | 958.4  | 77.3 | 2   | K.ELVTQQLPHLLK.D                                                                                            |
| gi 54607053 | r                   | 26     | 86     | 12.10%  | 2671     | 292708  |   |        |      |     | 7.4 GCN1 general control of amino-acid synthesis 1-like 1 [Homo sapiens]                                    |

|               |                    |        |        |         |          |         |   |                                                              |      |    |                                          |
|---------------|--------------------|--------|--------|---------|----------|---------|---|--------------------------------------------------------------|------|----|------------------------------------------|
| *             | HsFLAG-ARP6_Ti_1   | 3.7636 | 0.287  | 1441.9  | 1441.627 | 6158.7  | 1 | 1164.7                                                       | 76.9 | 2  | K.NLLHSLQSSGIGSK.A                       |
| *             | HsFlag-VPS71_Ti_1( | 3.6074 | 0.2277 | 2193.63 | 2194.617 | 6393.6  | 2 | 1021.5                                                       | 36.8 | 1  | R.GDTLLQALDLLPLLIQTVEK.A                 |
| *             | HsFLAG-FLJ20729_   | 3.1576 | 0.2072 | 2193.96 | 2194.617 | 4390.8  | 1 | 920.9                                                        | 57.9 | 2  | R.GDTLLQALDLLPLLIQTVEK.A                 |
| *             | HsFLAG-Lin9_Ti_20% | 4.2783 | 0.3673 | 2021.58 | 2022.396 | 7362.8  | 5 | 748.9                                                        | 36.1 | 2  | R.VLPQLISTITASVQNPALR.L                  |
| *             | HsFLAG-Lin9_Ti_20% | 4.5855 | 0.4092 | 2021.82 | 2022.396 | 8676.2  | 1 | 1245.9                                                       | 61.1 | 4  | R.VLPQLISTITASVQNPALR.L                  |
| *             | HsFLAG-Lin9_Ti_20% | 4.2037 | 0.2772 | 2240.34 | 2238.627 | 8375.1  | 1 | 1478.6                                                       | 55   | 8  | R.LQELDGELEAALGLLDIILAK.N                |
| *             | HsFLAG-FLJ20729_   | 4.3144 | 0.2571 | 2314.6  | 2315.758 | 8659.8  | 1 | 1227.9                                                       | 35   | 5  | K.NPSGLTQYIPVLVDSFPLLK.S                 |
| *             | HsFLAG-TCF3_Ti_1(  | 4.9102 | 0.3186 | 2315.9  | 2315.758 | 4286    | 1 | 981.8                                                        | 62.5 | 21 | K.NPSGLTQYIPVLVDSFPLLK.S                 |
| *             | HsYL1_Ti_106.2927. | 3.1428 | 0.4294 | 2401.36 | 2401.854 | 4020.4  | 1 | 374.5                                                        | 41.3 | 1  | R.VGKGEPGAAPLSAPAFSLVFPFLK.M             |
| *             | HsYL1_Ti_103.3774. | 3.7    | 0.2882 | 2118.88 | 2117.496 | 3998.2  | 1 | 723.3                                                        | 62.5 | 6  | K.GEPGAAPLSAPAFSLVFPFLK.M                |
| *             | HsFLAG-Lin9_Ti_20% | 3.5205 | 0.2633 | 1300.41 | 1300.544 | 11475.7 | 1 | 1522.2                                                       | 72.7 | 1  | R.LLTWVIGTGSPR.L                         |
| *             | HsFLAG-Lin9_Ti_20% | 2.8545 | 0.3068 | 1467.79 | 1467.754 | 4782.1  | 1 | 510.4                                                        | 58.3 | 2  | K.LYRPPPVLDALGR.V                        |
| *             | HsFLAG-FLJ20729_   | 3.5258 | 0.2451 | 1268.37 | 1268.409 | 7022.1  | 1 | 1496.7                                                       | 90   | 1  | K.LSQYLDSSQVK.P                          |
| *             | HsFlag-VPS71_Ti_1( | 3.4651 | 0.1899 | 1780.19 | 1779.043 | 3831.3  | 1 | 602.8                                                        | 71.4 | 3  | K.ENVNSELLPVFEEFLK.N                     |
| *             | HsFLAG-FLJ20729_   | 4.3467 | 0.3733 | 1826.58 | 1827.131 | 8682.8  | 1 | 1978.3                                                       | 73.3 | 9  | K.LVLPSLLAALEESWR.T                      |
| *             | HsFLAG-p53-DNA-D   | 3.5406 | 0.3927 | 2118.98 | 2119.466 | 7014.5  | 1 | 1136.7                                                       | 60.5 | 1  | R.NPEILAIAPVLLDALTDPSR.K                 |
| *             | HsFLAG-FLJ20729_   | 3.7037 | 0.1072 | 2246.81 | 2247.64  | 6003.5  | 1 | 789.5                                                        | 35   | 2  | R.NPEILAIAPVLLDALTDPSR.K                 |
| *             | HsFlag-DPCD_Ti_20  | 2.6567 | 0.1996 | 2249.7  | 2247.64  | 6438.7  | 2 | 455.7                                                        | 42.5 | 1  | R.NPEILAIAPVLLDALTDPSR.K                 |
| *             | HsYL1_Ti_101.1623. | 4.2758 | 0.4694 | 2047.56 | 2048.099 | 7256.7  | 1 | 1867.3                                                       | 66.7 | 2  | K.MTTETASEDDNFGTAQSNK.A                  |
| *             | HsFlag-VPS71_Ti_1( | 2.9965 | 0.1762 | 2652.07 | 2652.065 | 8815.2  | 2 | 379.6                                                        | 31.8 | 1  | K.TFEQLHSTIGHQALEDILPFLK.Q               |
| *             | HsFlag-VPS71_Ti_1( | 4.561  | 0.3614 | 2652.34 | 2652.065 | 8462.7  | 1 | 2503.9                                                       | 42   | 3  | K.TFEQLHSTIGHQALEDILPFLK.Q               |
| *             | HsFLAG-Lin9_Ti_20% | 2.8798 | 0.1809 | 1520.52 | 1520.769 | 10260.5 | 1 | 1017.3                                                       | 57.1 | 1  | R.VLAFSSVAGDALTR.H                       |
| *             | HsFLAG-p53-DNA-D   | 4.0377 | 0.2675 | 1475.42 | 1475.919 | 5578.6  | 1 | 1331.7                                                       | 76.9 | 4  | R.HLGVILPAVMLALK.E                       |
| *             | HsFlag-VPS71_Ti_1( | 3.051  | 0.3251 | 2449.67 | 2449.72  | 6334.2  | 1 | 542.5                                                        | 40.5 | 1  | R.LFNDSSPVVLEESWDALNAITK.K               |
| *             | HsYL1_Ti_106.2280. | 2.9577 | 0.1977 | 1184.5  | 1183.48  | 5766.3  | 1 | 1541.3                                                       | 85   | 1  | K.KGVTSILPVL.R.E                         |
| *             | HsFLAG-Lin9_Ti_20' | 3.368  | 0.1119 | 1487.07 | 1487.739 | 7752    | 2 | 1188.9                                                       | 70.8 | 1  | K.VDPLFTELLNGIR.A                        |
| gi 40807496 r |                    | 7      | 15     | 12.10%  | 1048     | 116954  |   | 6.7 OTU domain containing 4 protein isoform 1 [Homo sapiens] |      |    |                                          |
| *             | HsFLAG-ARP6_Ti_2   | 3.5371 | 0.1745 | 2724.98 | 2724.987 | 9547.3  | 1 | 1109.1                                                       | 34.1 | 1  | K.DFIIYREPNVSPSQVTENNPFK.V               |
| *             | HsFlag-FLJ90652_2% | 3.7187 | 0.3675 | 1838.24 | 1838.931 | 5823    | 1 | 823.6                                                        | 66.7 | 1  | K.KPSTSGQNFHSDVDYR.G                     |
| *             | HsFlag-FLJ20643_Ti | 5.3679 | 0.3936 | 3912.47 | 3913.172 | 6736.1  | 1 | 928.7                                                        | 27.2 | 3  | R.LLYEIQRNRDEQAFALSSSSVNSASQSSNPCVQR.K   |
| *             | HsFlag-FLJ20643_Ti | 4.9147 | 0.3666 | 1616.66 | 1615.737 | 7780.4  | 1 | 1739.4                                                       | 80.8 | 4  | R.RPEPSTLENITDDK.Y                       |
| *             | HsFlag-FLJ20643_Ti | 2.2174 | 0.1993 | 940.54  | 940.041  | 5867.5  | 1 | 490.1                                                        | 68.8 | 1  | K.YATVSSPSK.S                            |
| *             | HsFlag-FLJ20643_Ti | 3.3562 | 0.2142 | 1547.28 | 1546.715 | 9321.3  | 8 | 739.5                                                        | 57.7 | 1  | K.GELDLSLENLDLSK.D                       |
| *             | HsFlag-FLJ20643_Ti | 5.0941 | 0.3317 | 1568.86 | 1568.811 | 5847.6  | 1 | 1694.6                                                       | 80   | 4  | R.KADTALASIPPVAEGK.A                     |
| gi 27765083 r |                    | 3      | 3      | 12.10%  | 708      | 76573   |   | 5.1 calpastatin isoform a [Homo sapiens]                     |      |    |                                          |
| gi 27765085 r |                    | 3      | 3      | 12.50%  | 686      | 74067   |   | 5 calpastatin isoform b [Homo sapiens]                       |      |    |                                          |
| *             | HsFlag-VPS71_Ti_1( | 3.2066 | 0.3847 | 1838.62 | 1838.111 | 3972.7  | 4 | 263.6                                                        | 44.1 | 1  | K.SLTPAVPVESKPKPSGK.S                    |
| *             | HsFlag-VPS71_Ti_1( | 3.5517 | 0.1312 | 3605.56 | 3604.826 | 4251    | 1 | 465.3                                                        | 23.6 | 1  | K.EGITGPPADSSKPIGDDAIDALSSDFTCGSPTAAGK.K |
| *             | HsFlag-VPS71_Ti_1( | 3.8147 | 0.2048 | 3281.34 | 3279.372 | 5426.2  | 1 | 682.6                                                        | 26.7 | 1  | K.KPADDQPIDALSGDLSDSCPSTTETSQNTAK.D      |
| gi 8922712 re |                    | 3      | 4      | 12.10%  | 429      | 49398   |   | 6.8 septin 11 [Homo sapiens]                                 |      |    |                                          |
| *             | HsFLAG-p53-DNA-D   | 3.5914 | 0.3774 | 2142.47 | 2141.389 | 8638.6  | 3 | 467.7                                                        | 42.1 | 1  | R.NLSLSGHVGFDSLDPQLVNK.S                 |
| *             | HsFLAG-p53-DNA-D   | 4.1531 | 0.3229 | 1635.06 | 1635.814 | 9118.5  | 1 | 2129.3                                                       | 83.3 | 1  | K.KKELEEEVNNFQK.K                        |
| *             | HsFLAG-p53-DNA-D   | 4.813  | 0.2983 | 1957.7  | 1958.139 | 9289.3  | 1 | 1682.6                                                       | 61.1 | 2  | K.AAAQLLQSQAAQQSGAQQTK.K                 |

|                      |        |        |         |          |        |                                                                           |        |      |    |                                         |
|----------------------|--------|--------|---------|----------|--------|---------------------------------------------------------------------------|--------|------|----|-----------------------------------------|
| gi 4758356 re        | 2      | 2      | 12.10%  | 380      | 42593  | 8.6 flap structure-specific endonuclease 1 [Homo sapiens]                 |        |      |    |                                         |
| * HsFLAG-FLJ20729_   | 3.55   | 0.2862 | 2757.06 | 2758.168 | 9991   | 1                                                                         | 788.6  | 26   | 1  | K.HLLSLMGIPYLDAPSEAEASCAALVK.A          |
| * HsFLAG-FLJ20729_   | 2.9426 | 0.2892 | 2322.57 | 2323.605 | 5904.8 | 3                                                                         | 486.7  | 44.7 | 1  | K.EAHQLFLEPEVLDPESELVK.W                |
| gi 15147337 r        | 19     | 43     | 12.00%  | 2799     | 309352 | 5.8 E3 ubiquitin protein ligase, HECT domain containing, 1 [Homo sapiens] |        |      |    |                                         |
| * HsSrcap_Ti_204.245 | 3.609  | 0.3907 | 2051.94 | 2052.338 | 3834.2 | 1                                                                         | 486.8  | 58.8 | 2  | K.YNLNSHPPLNVLEQATIK.Q                  |
| HsSrcap_Ti_204.211   | 3.8332 | 0.3508 | 1883.47 | 1884.068 | 4965   | 1                                                                         | 375.2  | 50   | 3  | K.QCVVGNHAAFLLEDGR.V                    |
| HsSrcap_Ti_203.201   | 3.5332 | 0.2232 | 2387.73 | 2387.611 | 5265.6 | 1                                                                         | 711.3  | 47.6 | 1  | R.IGFSVQPDRLLELKGPDNNDGSK.L             |
| HsSrcap_Ti_205.516   | 6.8965 | 0.5039 | 3614.41 | 3613.149 | 7666.4 | 1                                                                         | 1397.4 | 28.7 | 7  | R.DRSGLLGSQPQPVIPASVIPEELISQAQVVLQGK.S  |
| HsSrcap_Ti_202.526   | 5.1069 | 0.3006 | 3341.77 | 3341.873 | 8312.7 | 1                                                                         | 1114.1 | 28.9 | 3  | R.GSGLLGSQPQPVIPASVIPEELISQAQVVLQGK.S   |
| HsSrcap_Ti_203.298   | 4.273  | 0.4006 | 2425.7  | 2425.703 | 8905.7 | 1                                                                         | 926    | 47.5 | 1  | K.KNTPVQSPVSLGEDLQWWPDK.D               |
| HsSrcap_Ti_203.155   | 4.2959 | 0.4652 | 1762.11 | 1762.874 | 9669.8 | 1                                                                         | 2341.3 | 82.1 | 2  | K.LEHTAQTYSSELQGER.I                    |
| HsSrcap_Ti_205.226   | 2.5641 | 0.2152 | 2058.3  | 2058.389 | 7384.2 | 2                                                                         | 344.9  | 44.1 | 1  | K.KLCIPEKTEILAVNVDSK.G                  |
| HsSrcap_Ti_203.357   | 5.4116 | 0.4112 | 3424.81 | 3422.698 | 8341.6 | 1                                                                         | 1029.2 | 29.3 | 1  | R.YCIFDLATGKAEQENNFPTSSIAFLGQNER.N      |
| HsScrap_Ti_103.279   | 3.5567 | 0.3784 | 1730.44 | 1730.017 | 7546.2 | 1                                                                         | 1000.9 | 60   | 3  | R.NVAIFTAGQESPIILR.D                    |
| HsSrcap_Ti_204.167   | 4.007  | 0.3901 | 1674.2  | 1674.739 | 5898.3 | 1                                                                         | 952.3  | 70.8 | 1  | K.RTSPTAYCDCWEK.C                       |
| HsScrap_Ti_103.240   | 3.2398 | 0.2866 | 1513.8  | 1513.778 | 6677.3 | 1                                                                         | 751.8  | 65.4 | 1  | R.LLTATNLVTL PNSR.G                     |
| HsSrcap_Ti_202.556   | 2.6525 | 0.2554 | 1860.02 | 1860.208 | 7917   | 2                                                                         | 700.1  | 56.2 | 1  | K.CTADILLDTLLGLTVK.E                    |
| HsSrcap_Ti_205.199   | 4.032  | 0.3372 | 1604.5  | 1603.861 | 6594.7 | 1                                                                         | 1028.3 | 65.4 | 4  | K.YNHLVYSQIPAAVK.L                      |
| HsSrcap_Ti_202.271   | 4.0855 | 0.2292 | 1927.94 | 1928.106 | 6450.3 | 1                                                                         | 1220.7 | 66.7 | 1  | K.LTYQDANLQNYVEEK.L                     |
| HsYL1_Ti_102.3468.   | 4.3753 | 0.2905 | 2426    | 2425.756 | 2886.1 | 1                                                                         | 844.9  | 59.1 | 2  | R.VFMEDVGAEPGSILTELGGEVFK.E             |
| HsSrcap_Ti_203.405   | 3.0423 | 0.3143 | 1690.42 | 1690.893 | 10272  | 2                                                                         | 999.6  | 53.6 | 1  | R.SFYTAIAQAFSLNEK.L                     |
| HsSrcap_Ti_203.411   | 4.7715 | 0.4124 | 2140.56 | 2141.491 | 7771.8 | 1                                                                         | 2004.9 | 70.6 | 4  | R.ILGLCLLQNELCPITLNR.H                  |
| HsSrcap_Ti_204.201   | 4.2297 | 0.2878 | 1495.32 | 1495.841 | 7061.5 | 1                                                                         | 1651.8 | 79.2 | 4  | R.MLVVAEQPLHAMR.K                       |
| gi 4757900 re        | 2      | 6      | 12.00%  | 417      | 48142  | 4.4 calreticulin precursor [Homo sapiens]                                 |        |      |    |                                         |
| * HsFlag-VPS71_Ti_10 | 4.5843 | 0.4158 | 1609.48 | 1608.791 | 7310.6 | 1                                                                         | 2392.3 | 88.5 | 2  | R.FYALSASFEPFSNK.G                      |
| * HsFLAG-p53-DNA-D   | 5.8593 | 0.4664 | 4150.76 | 4151.577 | 9567.9 | 1                                                                         | 1686.8 | 28.6 | 4  | K.GTWHPEIDNPEYSPDPSIYAYDNFVGLDLWQVK.S   |
| gi 8923092 re        | 2      | 3      | 12.00%  | 382      | 42864  | 9.8 glutaminyl-peptide cyclotransferase-like [Homo sapiens]               |        |      |    |                                         |
| * HsFLAG-TCF3_Ti_10  | 3.0057 | 0.2471 | 1126.41 | 1126.258 | 4874.2 | 2                                                                         | 564.2  | 75   | 2  | R.TPGSPGNLQVR.K                         |
| * HsFLAG-TCF3_Ti_10  | 3.6705 | 0.3221 | 3670.97 | 3671.191 | 9957.3 | 1                                                                         | 836.4  | 22.1 | 1  | K.LFPPGSTPFVGGATDSAVPCALLELAQALDLELSR.A |
| gi 27735029 r        | 2      | 3      | 12.00%  | 216      | 25091  | 6.7 MOB1, Mps One Binder kinase activator-like 1A [Homo sapiens]          |        |      |    |                                         |
| gi 8922671 re        | 2      | 3      | 12.00%  | 216      | 25008  | 7.2 Mob4B protein [Homo sapiens]                                          |        |      |    |                                         |
| HsFLAG-ARP5_Ti_10    | 2.8115 | 0.1609 | 1656.33 | 1656.879 | 6674.2 | 9                                                                         | 422    | 50   | 2  | K.KNIPEGSHQYELLK.H                      |
| HsARP6-FLAG_Ti_10    | 2.7569 | 0.2679 | 1498.54 | 1497.607 | 8868.5 | 1                                                                         | 730.9  | 59.1 | 1  | K.YEYHWADGTNIK.K                        |
| gi 4758950 re        | 2      | 2      | 12.00%  | 216      | 23743  | 9.4 peptidylprolyl isomerase B precursor [Homo sapiens]                   |        |      |    |                                         |
| * HsFLAG-Lin9_Ti_20  | 3.9357 | 0.2889 | 1365.04 | 1365.526 | 7713.5 | 1                                                                         | 1308   | 75   | 1  | K.TVDNFVALATGEK.G                       |
| * HsFLAG-ARP6_Ti_10  | 3.0073 | 0.2494 | 1459.62 | 1458.611 | 8178.6 | 1                                                                         | 1012.3 | 66.7 | 1  | K.DTNGSQFFITTVK.T                       |
| gi 6912292 re        | 3      | 29     | 12.00%  | 191      | 22225  | 5.9 chromobox homolog 5 (HP1 alpha homolog, Drosophila) [Homo sapiens]    |        |      |    |                                         |
| * HsFLAG-ARP6_Ti_10  | 2.6836 | 0.1469 | 1189.35 | 1190.293 | 7178.7 | 3                                                                         | 697.2  | 65   | 2  | K.DTDEADLVLAKE.E                        |
| * HsFLAG-ARP6_Ti_10  | 3.3583 | 0.2407 | 1190.32 | 1190.293 | 5953.4 | 1                                                                         | 1341.5 | 80   | 1  | K.DTDEADLVLAKE.E                        |
| HsFlag-NUFIP_Ti_10   | 4.4119 | 0.1679 | 1525.57 | 1525.711 | 7777.5 | 1                                                                         | 1543.6 | 77.3 | 26 | K.CPQIVIAFYEER.L                        |
| gi 8923269 re        | 8      | 29     | 11.90%  | 929      | 105693 | 9.4 testis expressed sequence 10 [Homo sapiens]                           |        |      |    |                                         |
| * HsH2AZ-FLAG_293_   | 3.7081 | 0.1847 | 1412.26 | 1412.759 | 4455.4 | 2                                                                         | 740    | 70.8 | 6  | R.LAAVQLLQFLAPK.I                       |
| * HsH2AZ-FLAG_293_   | 4.7019 | 0.3986 | 1815.31 | 1815.163 | 7220   | 1                                                                         | 1713.6 | 73.3 | 5  | K.VLDILLEQYPALITGR.S                    |

|               |                    |        |        |         |          |         |                                                                                                          |        |      |   |                                         |
|---------------|--------------------|--------|--------|---------|----------|---------|----------------------------------------------------------------------------------------------------------|--------|------|---|-----------------------------------------|
| *             | HsH2AZ-FLAG_293_   | 5.4766 | 0.44   | 1963.42 | 1964.229 | 9465.8  | 1                                                                                                        | 2214.6 | 70.6 | 7 | R.NPELSTQLIDIHTAAAR.A                   |
| *             | HsH2AZ-FLAG_293_   | 4.1533 | 0.2691 | 1964.35 | 1964.229 | 6666.6  | 1                                                                                                        | 1427.9 | 48.5 | 1 | R.NPELSTQLIDIHTAAAR.A                   |
| *             | HsH2AZ-FLAG_293_   | 4.6345 | 0.3726 | 2084.78 | 2086.309 | 5643.1  | 1                                                                                                        | 1593.9 | 66.7 | 3 | R.IYDPQEGAVVVLPADSQQR.L                 |
| *             | HsH2AZ-FLAG_293_   | 5.0445 | 0.3827 | 2045.49 | 2045.473 | 5093.5  | 1                                                                                                        | 888    | 58.8 | 4 | R.LVQLVYFLPSLPADLLSR.L                  |
| *             | HsH2AZ-FLAG_293_   | 4.6912 | 0.2428 | 1451.32 | 1451.619 | 7752.5  | 1                                                                                                        | 2170.2 | 87.5 | 1 | R.SQNFILQSAISK.H                        |
| *             | HsH2AZ-FLAG_293_   | 3.295  | 0.3049 | 1506.23 | 1506.786 | 3942    | 1                                                                                                        | 584.7  | 65.4 | 2 | R.VGPEELPVVGQLLR.L                      |
| gij4758556 re | 3                  | 4      | 11.90% | 683     | 77529    | 9.5     | PRP3 pre-mRNA processing factor 3 homolog [Homo sapiens]                                                 |        |      |   |                                         |
| *             | HsFLAG-p53-DNA-D   | 2.6611 | 0.1396 | 1699.47 | 1699.904 | 4688.1  | 3                                                                                                        | 496.4  | 53.6 | 1 | K.AADHLKPFLDDSTLR.F                     |
| *             | HsFlag-VPS71_Ti_1C | 5.5478 | 0.3682 | 3332.15 | 3330.694 | 5433.2  | 1                                                                                                        | 1138   | 33.3 | 2 | K.TPSSQPERLPIGNTIQPSQAATFMNDAIEK.A      |
| *             | HsFLAG-p53-DNA-D   | 5.2182 | 0.3488 | 3926.42 | 3928.39  | 8670.2  | 1                                                                                                        | 722.2  | 24.3 | 1 | K.REDFYGITNLVEHPAQLNPPVDNDTPVTLGVYLTK.K |
| gij5031571 re | 2                  | 6      | 11.90% | 394     | 44761    | 6.7     | actin-related protein 2 isoform b [Homo sapiens]                                                         |        |      |   |                                         |
| gij53692187 r | 2                  | 6      | 11.80% | 399     | 45377    | 7.2     | actin-related protein 2 isoform a [Homo sapiens]                                                         |        |      |   |                                         |
|               | HsFLAG-p53-DNA-D   | 3.7812 | 0.4132 | 1392.85 | 1393.541 | 4341.2  | 1                                                                                                        | 743.3  | 80   | 2 | K.HLWDYTFGPEK.L                         |
|               | HsFLAG-Lin9_Ti_20  | 6.3159 | 0.4039 | 3939.67 | 3940.445 | 7999.4  | 1                                                                                                        | 1432.5 | 27.9 | 4 | R.FEAPALFQPHLINVEGVGVAELLFNTIQAADIDTR.S |
| gij25777711 r | 1                  | 4      | 11.90% | 160     | 18063    | 4.5     | S-phase kinase-associated protein 1A isoform a [Homo sapiens]                                            |        |      |   |                                         |
| gij25777713 r | 1                  | 4      | 11.70% | 163     | 18658    | 4.5     | S-phase kinase-associated protein 1A isoform b [Homo sapiens]                                            |        |      |   |                                         |
|               | HsSrcap_Ti_204.523 | 4.8198 | 0.4189 | 2137.19 | 2137.481 | 8285.5  | 1                                                                                                        | 1576.1 | 61.1 | 4 | K.VDQGTFLFELILAAANYLDIK.G               |
| gij4505941 re | 10                 | 24     | 11.80% | 1174    | 133896   | 6.9     | PolII_Rpb2 {DNA directed RNA polymerase II polypeptide B; polymerase (RNA) II (DNA directed) polypeptide |        |      |   |                                         |
| *             | HsFlag-NUFIP_Ti_1C | 4.2966 | 0.4476 | 2798.3  | 2799.023 | 7184.3  | 1                                                                                                        | 791.9  | 42   | 2 | R.IVEDAPPIDLQAEAQHASGEVEEPPR.Y          |
| *             | HsFlag-NUFIP_Ti_11 | 3.7306 | 0.237  | 1834.91 | 1835.072 | 6140.5  | 1                                                                                                        | 611.4  | 57.7 | 3 | K.FEQIYLSKPTHWER.D                      |
| *             | HsFlag-NUFIP_Ti_11 | 3.4021 | 0.2651 | 1246.58 | 1246.452 | 7864.9  | 2                                                                                                        | 1086.2 | 80   | 4 | R.LTFASTLSHLR.R                         |
| *             | HsFlag-NUFIP_Ti_1C | 3.0466 | 0.1179 | 1242.83 | 1241.526 | 6762.1  | 4                                                                                                        | 1056   | 77.8 | 2 | R.ICRPLLIVEK.Q                          |
| *             | HsFlag-NUFIP_Ti_11 | 4.7095 | 0.4135 | 2245.99 | 2247.66  | 8615.8  | 1                                                                                                        | 1093   | 52.8 | 1 | R.MDTLAHVLYYPQKPLVTTR.S                 |
| *             | HsFlag-NUFIP_Ti_11 | 5.7943 | 0.4581 | 2247.31 | 2247.66  | 7905.4  | 1                                                                                                        | 2564.4 | 51.4 | 3 | R.MDTLAHVLYYPQKPLVTTR.S                 |
| *             | HsFlag-NUFIP_Ti_1C | 4.0032 | 0.3678 | 2212.99 | 2213.464 | 9209.3  | 1                                                                                                        | 554.1  | 42.1 | 1 | R.TSETGIVDQVMVTLNQEGYK.F                |
| *             | HsSrcap_Ti_205.314 | 3.9709 | 0.2457 | 1501.15 | 1500.763 | 7472    | 1                                                                                                        | 982.3  | 66.7 | 2 | R.MTIGHLIECLQGK.V                       |
| *             | HsFlag-NUFIP_Ti_1C | 4.2248 | 0.3757 | 1550.67 | 1551.742 | 6581.7  | 1                                                                                                        | 1224.2 | 75   | 2 | K.ISNLLSDYGYHLR.G                       |
| *             | HsFlag-NUFIP_Ti_1C | 3.9146 | 0.2907 | 1486.66 | 1487.624 | 7689.6  | 1                                                                                                        | 1786.4 | 83.3 | 4 | R.DCQIAHGAAQFLR.E                       |
| gij4759196 re | 5                  | 14     | 11.80% | 1142    | 126500   | 6.4     | symplekin [Homo sapiens]                                                                                 |        |      |   |                                         |
| *             | HsFLAG-p53-DNA-D   | 4.0245 | 0.3013 | 2499.34 | 2498.946 | 8810.6  | 1                                                                                                        | 1121.1 | 47.8 | 1 | K.FMVHPAISSINLTALGSLANIAR.Q             |
| *             | HsARP6-FLAG_Ti_1   | 2.6268 | 0.2173 | 1838.3  | 1839.183 | 6892.4  | 1                                                                                                        | 958.5  | 62.5 | 2 | K.VVLEAPLITESALEVVR.K                   |
| *             | HsFLAG-p53-DNA-D   | 4.5986 | 0.2819 | 3308.67 | 3309.747 | 9572.4  | 1                                                                                                        | 1070.7 | 26.6 | 2 | R.LLGTQHGEGNALSPLNPGELLIALHNIDSVK.C     |
| *             | HsFLAG-p53-DNA-D   | 3.8976 | 0.2419 | 3191.03 | 3191.586 | 8611.4  | 1                                                                                                        | 966.2  | 27.7 | 2 | R.SFTPHQQAHIPNSIMTILEASGKQPEAK.E        |
| *             | HsFLAG-p53-DNA-D   | 4.5966 | 0.3784 | 3460.19 | 3460.909 | 4404.3  | 1                                                                                                        | 368.9  | 23.4 | 7 | K.EAPAGPLEEDDLEPLTLAPAPAPRPPQDLIGLR.L   |
| gij5031579 re | 4                  | 8      | 11.80% | 692     | 76108    | 5.1     | A-kinase anchor protein 8 [Homo sapiens]                                                                 |        |      |   |                                         |
| *             | HsFlag-NUFIP_Ti_1C | 4.5848 | 0.3459 | 3292.1  | 3291.555 | 7658.1  | 1                                                                                                        | 625.5  | 23.4 | 1 | K.ANDGGLAAGAPAMHMASYGPEPCTDNSDSLIAK.I   |
| *             | HsYL1_Ti_101.1566  | 2.8748 | 0.1914 | 1111.68 | 1111.15  | 2884.3  | 4                                                                                                        | 561.7  | 87.5 | 2 | R.SFDDEEIQK.H                           |
| *             | HsFLAG-TCF3_Ti_1C  | 4.0209 | 0.2485 | 2084.12 | 2084.331 | 10386.1 | 4                                                                                                        | 1273.8 | 34.2 | 1 | K.ETPEEVAADVLAEVITA AVR.A               |
| *             | HsMRGBP-FLAG_Ti_1  | 4.3245 | 0.4559 | 1970.77 | 1971.085 | 5464.4  | 1                                                                                                        | 837.5  | 57.9 | 4 | R.VAPAPAAAADAEVEQTDAESK.D               |
| gij21450832 r | 1                  | 3      | 11.80% | 255     | 29484    | 7.1     | hypothetical protein LOC220134 [Homo sapiens]                                                            |        |      |   |                                         |
| *             | HsFLAG-Lin9_Ti_20  | 5.9662 | 0.3993 | 3516.16 | 3515.983 | 8283.4  | 1                                                                                                        | 1416.9 | 31   | 3 | K.IGDEIIVINELLNKLELEIQYQEQTNNSLK.E      |
| gij21361361 r | 5                  | 7      | 11.70% | 632     | 67868    | 8.1     | ilvB (bacterial acetolactate synthase)-like isoform 1 [Homo sapiens]                                     |        |      |   |                                         |
|               | HsFLAG-ARP6_Ti_1   | 5.183  | 0.4269 | 2104.19 | 2102.491 | 6786.1  | 1                                                                                                        | 1758.1 | 63.9 | 1 | R.FIFTLVGGHISPLLVACEK.L                 |

|                |                    |        |        |         |          |         |   |        |      |   |                                                                                     |
|----------------|--------------------|--------|--------|---------|----------|---------|---|--------|------|---|-------------------------------------------------------------------------------------|
| *              | HsSrcap_Ti_204.315 | 5.0971 | 0.4304 | 1916.43 | 1917.225 | 8734.6  | 1 | 1421.1 | 62.5 | 2 | R.GALQAVDQLSLFRPLCK.F                                                               |
| *              | HsSrcap_Ti_204.316 | 4.1846 | 0.2955 | 1917.67 | 1917.225 | 6731.8  | 2 | 978.7  | 43.8 | 1 | R.GALQAVDQLSLFRPLCK.F                                                               |
| *              | HsSrcap_Ti_206.261 | 4.7    | 0.3836 | 1998.88 | 1999.376 | 6283.1  | 1 | 897.5  | 61.1 | 1 | K.RPLMVLGSQLLTPTSADK.L                                                              |
| *              | HsSrcap_Ti_202.360 | 4.3714 | 0.4305 | 2227.8  | 2227.481 | 6425.4  | 1 | 952.6  | 58.3 | 2 | K.LVEGLQGQQTWAPDWVEELR.E                                                            |
| gij 41281398 r | 3                  | 3      | 11.70% | 582     | 64888    |         |   |        |      |   | 8.5 soc-2 suppressor of clear homolog [Homo sapiens]                                |
| *              | HsFLAG-Lin9_Ti_20  | 3.8361 | 0.1966 | 3696.96 | 3696.029 | 9228.8  | 1 | 715.6  | 22.7 | 1 | K.EIGNCTQITNLDLQHNELLDLPTIGNLSSLSR.L                                                |
| *              | HsFLAG-Lin9_Ti_20  | 3.2133 | 0.274  | 2367.41 | 2366.801 | 12034.1 | 1 | 810.4  | 40.5 | 1 | K.IPEDVSGLVSEVLILSNLLK.K                                                            |
| *              | HsFLAG-Lin9_Ti_20  | 3.1098 | 0.3462 | 1482.74 | 1483.751 | 9412.5  | 1 | 936.7  | 66.7 | 1 | K.LVLTNNQLTTLPR.G                                                                   |
| gij 24307981 r | 2                  | 2      | 11.70% | 291     | 31835    |         |   |        |      |   | 5.2 exosome component 7 [Homo sapiens]                                              |
| *              | HsFLAG-p53-DNA-D   | 3.8873 | 0.3883 | 1597.53 | 1595.706 | 10626.8 | 1 | 1282.2 | 64.3 | 1 | R.GGDDLGTIEIANTLYR.I                                                                |
| *              | HsFLAG-p53-DNA-D   | 3.5833 | 0.3958 | 2074.91 | 2073.4   | 9838.8  | 1 | 721.8  | 47.2 | 1 | K.VLHASLQSVLHKEESLGP.K.R                                                            |
| gij 44955910 r | 9                  | 24     | 11.60% | 911     | 99854    |         |   |        |      |   | 8.2 E2F transcription factor 7 [Homo sapiens]                                       |
| *              | HsARP6-FLAG_Ti_1   | 3.2526 | 0.378  | 1870.38 | 1871.187 | 7903.1  | 1 | 803    | 53.3 | 2 | R.IYDIVNVLESLHLVSR.V                                                                |
| *              | HsARP6-FLAG_Ti_1   | 4.0318 | 0.3371 | 1870.74 | 1871.187 | 3534.2  | 1 | 555.5  | 43.3 | 2 | R.IYDIVNVLESLHLVSR.V                                                                |
| *              | HsFLAG-FLJ20729_   | 4.8109 | 0.4281 | 1647.47 | 1647.996 | 6734.7  | 1 | 2028.3 | 82.1 | 4 | R.LYDIANVLTSLAIK.K                                                                  |
| *              | HsFlag-VPS71_Ti_1  | 3.738  | 0.4118 | 1333.8  | 1333.403 | 7335.2  | 1 | 1667.2 | 86.4 | 2 | R.HGSFNTVQASER.I                                                                    |
| *              | HsH2AZ-FLAG_293_   | 3.2687 | 0.3104 | 1760.51 | 1760.896 | 6603.9  | 1 | 626.8  | 47.1 | 1 | R.SSEAPATVELSSAPSAQK.R                                                              |
| *              | HsFlag-FLJ90652_2  | 3.5788 | 0.2118 | 1246.09 | 1246.36  | 5654.5  | 1 | 1159.4 | 81.8 | 5 | K.KPSDSTDLASPK.T                                                                    |
| *              | HsFlag-VPS71_Ti_1  | 6.297  | 0.5171 | 2362.7  | 2360.675 | 10168.4 | 1 | 2343.9 | 41.7 | 6 | R.SHSVQQPESPVYVGHVPSVVK.L                                                           |
| *              | HsFlag-VPS71_Ti_1  | 3.0403 | 0.3334 | 1202.66 | 1203.427 | 6454.7  | 1 | 745.7  | 75   | 1 | K.LHQSPVPVTPK.S                                                                     |
| *              | HsFlag-VPS71_Ti_1  | 2.5445 | 0.3077 | 1203.54 | 1203.427 | 6906.1  | 1 | 792.6  | 75   | 1 | K.LHQSPVPVTPK.S                                                                     |
| gij 21218438 r | 5                  | 10     | 11.60% | 593     | 65261    |         |   |        |      |   | 9.7 GATA zinc finger domain containing 2B [Homo sapiens]                            |
| *              | HsSrcap_Ti_205.196 | 4.7382 | 0.4169 | 2513.55 | 2514.844 | 5762.1  | 1 | 763.3  | 45.8 | 2 | K.TPVVQNAASIVQPSAHVGGQLSK.L                                                         |
| *              | HsSrcap_Ti_205.196 | 5.032  | 0.4057 | 2514.7  | 2514.844 | 7956.2  | 1 | 1450.2 | 35.4 | 3 | K.TPVVQNAASIVQPSAHVGGQLSK.L                                                         |
| *              | HsSrcap_Ti_206.220 | 3.2522 | 0.2238 | 1720.67 | 1719.941 | 5502.3  | 5 | 533    | 53.3 | 1 | K.LPSRPGAQGVQPQLNR.T                                                                |
| *              | HsSrcap_Ti_205.209 | 3.7031 | 0.3211 | 1687.92 | 1688.957 | 5017.5  | 1 | 505.3  | 57.1 | 3 | R.SATNTTLPHMLMSQR.V                                                                 |
| *              | HsFlag-VPS71_Ti_1  | 3.4226 | 0.3602 | 1394.04 | 1392.601 | 3523.5  | 1 | 831.7  | 83.3 | 1 | R.VIAPNPAQLQGQR.G                                                                   |
| gij 16905526 r | 4                  | 17     | 11.60% | 398     | 45566    |         |   |        |      |   | 8.9 death-associated protein 3 [Homo sapiens]                                       |
| gij 4758118 re | 4                  | 17     | 11.60% | 398     | 45566    |         |   |        |      |   | 8.9 death-associated protein 3 [Homo sapiens]                                       |
|                | HsFlag-NUFIP_Ti_11 | 3.9547 | 0.2409 | 1326.33 | 1325.637 | 8395.2  | 1 | 1223.2 | 80   | 2 | R.KPALELLHYLK.N                                                                     |
|                | HsFlag-NUFIP_Ti_1  | 4.5676 | 0.2974 | 1659.95 | 1659.926 | 5497.8  | 1 | 1157.5 | 50   | 3 | K.SPIAPEELALVHNL.R.K                                                                |
|                | HsFlag-NUFIP_Ti_1  | 5.4356 | 0.3554 | 1660.73 | 1659.926 | 6210.5  | 1 | 1596.9 | 78.6 | 7 | K.SPIAPEELALVHNL.R.K                                                                |
|                | HsFlag-NUFIP_Ti_1  | 4.4259 | 0.3438 | 2251.23 | 2250.556 | 4962.6  | 1 | 650.4  | 52.6 | 5 | K.EGFDALDPFIPILVSNYNPK.E                                                            |
| gij 56181387 r | 3                  | 3      | 11.60% | 303     | 34856    |         |   |        |      |   | 5.9 STIP1 homology and U-box containing protein 1 [Homo sapiens]                    |
| *              | HsFLAG-ARP6_Ti_1   | 3.5835 | 0.4053 | 1309.63 | 1310.495 | 8063.2  | 1 | 1253.7 | 75   | 1 | R.NPLVAVYYTNR.A                                                                     |
| *              | HsFLAG-ARP6_Ti_1   | 2.5645 | 0.2842 | 1028.59 | 1028.156 | 5016.3  | 1 | 717.2  | 81.2 | 1 | R.VGHFDPVTR.S                                                                       |
| *              | HsFLAG-ARP6_Ti_1   | 4.4706 | 0.3069 | 1684.51 | 1684.004 | 4466.4  | 1 | 1086   | 75   | 1 | R.SPLTQEQLIPNLAMK.E                                                                 |
| gij 5453880 re | 2                  | 4      | 11.60% | 249     | 28585    |         |   |        |      |   | 4.1 acidic (leucine-rich) nuclear phosphoprotein 32 family, member A [Homo sapiens] |
| *              | HsH2AZ-FLAG_293_   | 3.4269 | 0.3083 | 1467.96 | 1468.619 | 5410.5  | 1 | 553.6  | 66.7 | 1 | K.CPNLTHLNLNSGNK.I                                                                  |
|                | HsFLAG-p53-DNA-D   | 4.483  | 0.4382 | 1973.2  | 1974.1   | 7741.8  | 1 | 1183.4 | 63.3 | 3 | K.SLDLNFCEVTNLNDYR.E                                                                |
| gij 4758638 re | 2                  | 4      | 11.60% | 224     | 25035    |         |   |        |      |   | 6.4 peroxiredoxin 6 [Homo sapiens]                                                  |
| *              | HsFLAG-p53-DNA-D   | 4.8603 | 0.4294 | 2030.86 | 2032.268 | 9333    | 1 | 1795.8 | 68.8 | 1 | R.FHDFLGDSWGILFSHPR.D                                                               |
| *              | HsFlag-VPS71_Ti_1  | 2.4564 | 0.2461 | 1008.68 | 1008.205 | 5464.9  | 2 | 760.1  | 75   | 3 | R.VVVFVFGPK.K                                                                       |

|             |                    |        |        |         |          |         |                                                                                           |        |      |                                     |
|-------------|--------------------|--------|--------|---------|----------|---------|-------------------------------------------------------------------------------------------|--------|------|-------------------------------------|
| gi 27436901 | r                  | 2      | 5      | 11.60%  | 198      | 21348   | 8.9 mitochondrial ribosomal protein L12 [Homo sapiens]                                    |        |      |                                     |
| *           | HsFLAG-ARP6_Ti_1   | 4.0092 | 0.2609 | 1361.55 | 1361.584 | 8009.3  | 1                                                                                         | 1799   | 86.4 | 3 K.NYIQGINLVQAK.K                  |
| *           | HsFLAG-ARP6_Ti_1   | 3.9966 | 0.2321 | 1284.41 | 1284.539 | 5903.3  | 3                                                                                         | 1116.7 | 80   | 2 K.KLVESLPQEIK.A                   |
| gi 4502313  | re                 | 1      | 2      | 11.60%  | 155      | 15736   | 8.5 ATPase, H+ transporting, lysosomal, V0 subunit c [Homo sapiens]                       |        |      |                                     |
| gi 89040630 | r                  | 1      | 2      | 11.20%  | 160      | 16129   | 9.5 PREDICTED: similar to Vacuolar ATP synthase 16 kDa proteolipid subunit [Homo sapiens] |        |      |                                     |
|             | HsFLAG-ARP6_Ti_1   | 4.6228 | 0.4292 | 1907.59 | 1908.3   | 8264.8  | 1                                                                                         | 1013.9 | 52.9 | 2 K.SGTGIAAMSVMRPEQIMK.S            |
| gi 31377595 | r                  | 7      | 18     | 11.50%  | 953      | 106359  | 8.2 conserved nuclear protein NHN1 [Homo sapiens]                                         |        |      |                                     |
| *           | HsYL1_Ti_101.1551. | 3.2058 | 0.3527 | 1508.01 | 1507.511 | 7048    | 1                                                                                         | 727    | 58.3 | 1 K.SDQDSEVNELSR.G                  |
| *           | HsFlag-DPCD_Ti_20  | 3.7106 | 0.295  | 3255.96 | 3256.325 | 5729.6  | 1                                                                                         | 648.7  | 30.6 | 1 R.ELDEHELDYDEEVPEEPAPAVQEDEAEK.A  |
| *           | HsH2AZ-FLAG_293_   | 4.7191 | 0.391  | 2252.98 | 2252.395 | 4374.4  | 1                                                                                         | 1076.9 | 70.6 | 6 R.DTVLEPYADPYDYEIER.F             |
| *           | HsFLAG-FLJ20729_   | 3.1674 | 0.2794 | 1699.99 | 1700.805 | 7741.3  | 1                                                                                         | 635.8  | 58.3 | 2 R.VQYTETEPYHNYR.E                 |
| *           | HsFLAG-Lin9_Ti_20  | 2.9046 | 0.3215 | 1299.51 | 1300.544 | 4252.6  | 1                                                                                         | 700.3  | 70.8 | 2 K.KPAPPAPPQATK.T                  |
| *           | HsFLAG-Lin9_Ti_20  | 3.4249 | 0.2661 | 1301.1  | 1300.544 | 6887.9  | 1                                                                                         | 1245.9 | 79.2 | 3 K.KPAPPAPPQATK.T                  |
| *           | HsFlag-NUFIP_Ti_20 | 3.8242 | 0.3092 | 2632.56 | 2632.852 | 4404.7  | 1                                                                                         | 563.5  | 34.4 | 3 K.SSQQPSTPQQAPPQQGTFVAHK.E        |
| gi 4885281  | re                 | 4      | 11     | 11.50%  | 558      | 61398   | 7.8 glutamate dehydrogenase 1 [Homo sapiens]                                              |        |      |                                     |
|             | HsFLAG-ARP6_Ti_1   | 3.953  | 0.2706 | 1426.22 | 1426.482 | 8910    | 1                                                                                         | 1560.1 | 77.3 | 1 R.DDGSWEVIEGYR.A                  |
| *           | HsFLAG-ARP6_Ti_1   | 4.5743 | 0.433  | 2046.29 | 2045.318 | 6833    | 1                                                                                         | 969.8  | 55.3 | 4 K.KGFIGPGIDVPAPDMSTGER.E          |
|             | HsFLAG-ARP6_Ti_1   | 4.2461 | 0.4415 | 1749.2  | 1750.028 | 7602.2  | 1                                                                                         | 1450.8 | 70   | 2 K.TFVVQGFQNVGLHSMR.Y              |
| *           | HsFLAG-p53-DNA-D   | 3.7078 | 0.2532 | 1738.78 | 1738.941 | 4320    | 1                                                                                         | 407.9  | 53.3 | 4 K.HGGTIPIVPTAEFQDR.I              |
| gi 13375656 | r                  | 2      | 2      | 11.50%  | 244      | 27949   | 8 UL16 binding protein 3 [Homo sapiens]                                                   |        |      |                                     |
| *           | HsFLAG-ARP6_Ti_1   | 4.8543 | 0.4642 | 2148.78 | 2149.426 | 8924.7  | 1                                                                                         | 1642.9 | 61.1 | 1 K.VLSMGHLEEQLYATDAWGK.Q           |
| *           | HsFLAG-ARP6_Ti_1   | 2.8578 | 0.212  | 997.34  | 997.145  | 5629.9  | 1                                                                                         | 1019.1 | 93.8 | 1 K.WTVVHAGAR.R                     |
| gi 5454106  | re                 | 1      | 2      | 11.50%  | 218      | 21711   | 6.5 TBP-related factor 10 [Homo sapiens]                                                  |        |      |                                     |
| *           | HsFLAG-FLJ20309_   | 5.9292 | 0.5396 | 1964.63 | 1965.133 | 6924.2  | 1                                                                                         | 1831.7 | 62.5 | 2 K.ASPAGTAGGPGAGAAAGGTGPLAAR.A     |
| gi 61835148 | r                  | 7      | 29     | 11.40%  | 621      | 69721   | 6.2 fragile X mental retardation-related protein 1 isoform a [Homo sapiens]               |        |      |                                     |
| gi 61835172 | r                  | 7      | 29     | 13.20%  | 536      | 59920   | 6.8 fragile X mental retardation-related protein 1 isoform c [Homo sapiens]               |        |      |                                     |
| gi 61835164 | r                  | 7      | 29     | 13.20%  | 539      | 60792   | 6.4 fragile X mental retardation-related protein 1 isoform b [Homo sapiens]               |        |      |                                     |
|             | HsFLAG-ARP6_Ti_1   | 3.8108 | 0.1985 | 2379.89 | 2380.761 | 6520.1  | 1                                                                                         | 831.9  | 50   | 2 R.IFYHPETTQLMILSASEATVK.R         |
|             | HsARP6-FLAG_Ti_1   | 3.6123 | 0.136  | 2380.18 | 2380.761 | 10599.4 | 2                                                                                         | 1270.3 | 32.5 | 1 R.IFYHPETTQLMILSASEATVK.R         |
|             | HsFLAG-ARP6_Ti_1   | 3.0669 | 0.2374 | 1198.45 | 1198.426 | 5967.6  | 7                                                                                         | 925.6  | 77.8 | 1 R.VNILSDMHLR.S                    |
|             | HsFLAG-p53-DNA-D   | 4.2427 | 0.3276 | 1948.77 | 1949.168 | 5801    | 1                                                                                         | 1338.1 | 67.6 | 3 R.KVPGVTAIELDEDTGTFR.I            |
|             | HsFLAG-ARP6_Ti_1   | 4.5911 | 0.5043 | 1820.16 | 1820.994 | 6369.1  | 1                                                                                         | 1261.9 | 65.6 | 5 K.VPGVTAIELDEDTGTFR.I             |
|             | HsFLAG-FLJ20309_   | 4.1942 | 0.371  | 1697.19 | 1696.943 | 5158.4  | 1                                                                                         | 1126.5 | 73.1 | 16 R.GFLEFVEDFIQVPR.N               |
|             | HsFLAG-FLJ20309_   | 2.4912 | 0.0894 | 944.53  | 944.116  | 6753.9  | 7                                                                                         | 655    | 71.4 | 1 K.VIQEIVDK.S                      |
| gi 7657611  | re                 | 2      | 7      | 11.40%  | 264      | 30987   | 9.2 DnaJ (Hsp40) homolog, subfamily C, member 8 [Homo sapiens]                            |        |      |                                     |
| *           | HsFLAG-p53-DNA-D   | 5.5124 | 0.2211 | 3351.44 | 3352.722 | 9723.9  | 4                                                                                         | 812.7  | 24.1 | 5 R.LTRPGSSYFNLNPFVQLIDPEVTDEEIK.K  |
| *           | HsFlag-VPS71_Ti_10 | 4.9312 | 0.2823 | 3480.35 | 3480.896 | 5948.5  | 1                                                                                         | 599.1  | 25   | 2 R.LTRPGSSYFNLNPFVQLIDPEVTDEEIKK.R |
| gi 4826898  | re                 | 1      | 10     | 11.40%  | 140      | 15054   | 8.3 profilin 1 [Homo sapiens]                                                             |        |      |                                     |
| *           | HsFLAG-FLJ20729_   | 4.2004 | 0.2074 | 1643.99 | 1644.952 | 5501.7  | 1                                                                                         | 1377.8 | 73.3 | 10 K.TFVNITPAEVLVVGK.D              |
| gi 7661966  | re                 | 12     | 23     | 11.30%  | 2089     | 226690  | 5.5 mediator of DNA damage checkpoint 1 [Homo sapiens]                                    |        |      |                                     |
| *           | HsFlag-DPCD_Ti_20  | 3.1934 | 0.3629 | 1656.42 | 1656.846 | 9086.1  | 1                                                                                         | 1071.4 | 64.3 | 2 R.DCGSLNGTQILRPPK.V               |
| *           | HsFLAG-FLJ20729_   | 3.532  | 0.3919 | 1884.33 | 1885.084 | 5835.1  | 1                                                                                         | 490.8  | 50   | 2 K.SQLPAEGDAGAEEWAAAVLK.Q          |
| *           | HsFLAG-Lin9_Ti_20  | 4.1791 | 0.2302 | 2357.18 | 2356.6   | 10120.6 | 1                                                                                         | 1454.4 | 35.2 | 2 R.AHEVGAQQGPPVAQVEQDLPISR.E       |

|               |                    |        |        |         |          |         |   |        |      |                                                                                                |
|---------------|--------------------|--------|--------|---------|----------|---------|---|--------|------|------------------------------------------------------------------------------------------------|
| *             | HsFLAG-p53-DNA-D   | 3.7728 | 0.3051 | 3391.81 | 3391.78  | 6963.6  | 1 | 765.5  | 27.3 | 1 R.MTPFPATSAAPEHPSTSTAQPVTPKPTSQATR.S                                                         |
| *             | HsFlag-DPCD_Ti_20  | 4.0577 | 0.3719 | 3376.77 | 3378.715 | 6042.3  | 1 | 531.8  | 25.8 | 1 K.TPETLVPTAPKLEPSTSTDQPVTPPEPTSQATR.G                                                        |
| *             | HsSrcap_Ti_201.075 | 3.6944 | 0.215  | 2242.76 | 2243.389 | 6109.4  | 1 | 616.9  | 47.5 | 1 K.LEPSTSTDQPVTPPEPTSQATR.G                                                                   |
| *             | HsFLAG-UTX1_Ti_20  | 3.1948 | 0.2633 | 1922.28 | 1923.174 | 3318.3  | 1 | 236.1  | 44.1 | 2 K.TPESIVPIAPELQPSTSR.N                                                                       |
| *             | HsFLAG-Lin9_Ti_20  | 3.89   | 0.29   | 2624.67 | 2624.907 | 6275.6  | 1 | 681.5  | 31.2 | 1 K.TPEPVVPTAPEPHPTTSTDQPVTPK.L                                                                |
| *             | HsFlag-VPS71_Ti_10 | 4.2337 | 0.492  | 2166.73 | 2167.427 | 8265.8  | 1 | 890.2  | 47.7 | 3 R.AVLALGGSLAGSAAEASHLVTD.R.I                                                                 |
| *             | HsARP6-FLAG_Ti_1   | 3.1146 | 0.4148 | 1635.25 | 1635.907 | 5053    | 1 | 622.7  | 65.4 | 2 R.GIPILSLDWLHQSR.K                                                                           |
| *             | HsFLAG-FLJ20729_   | 3.3034 | 0.3498 | 2039.12 | 2040.302 | 6317.3  | 1 | 543.3  | 50   | 1 R.VVITCPQDFPHCSIPLR.V                                                                        |
| *             | HsFLAG-Lin9_Ti_20  | 3.5457 | 0.2972 | 1796.64 | 1797.232 | 5440.9  | 9 | 380.6  | 46.9 | 5 R.VGLPLLSPEFLLTGVLK.Q                                                                        |
| gi 5174559 re |                    | 5      | 8      | 11.20%  | 738      | 80242   |   |        |      | 6 melanoma-associated antigen p97 isoform 1, precursor [Homo sapiens]                          |
| *             | HsFLAG-ARP6_Ti_1   | 3.8415 | 0.4239 | 1733.44 | 1733.965 | 3700.6  | 1 | 889.7  | 73.3 | 1 R.TVGWNVPVGYLVESGR.L                                                                         |
| *             | HsFLAG-ARP6_Ti_1   | 5.33   | 0.4516 | 2234.79 | 2235.511 | 5229.2  | 1 | 1340.4 | 72.2 | 4 K.TLPSWGQALLSQDFELLCR.D                                                                      |
| *             | HsFLAG-ARP6_Ti_1   | 2.6872 | 0.1463 | 1273.52 | 1273.482 | 2480.8  | 1 | 434.5  | 80   | 1 R.LKPEIQCVSAK.S                                                                              |
| *             | HsFLAG-ARP6_Ti_1   | 4.1853 | 0.1778 | 2283.47 | 2283.517 | 4857.5  | 1 | 694    | 35.7 | 1 R.SCHAGFGSPAGWDVPVVALIQR.G                                                                   |
| *             | HsFLAG-ARP6_Ti_1   | 3.7065 | 0.3582 | 1802.05 | 1802.999 | 9257.8  | 1 | 1186.6 | 64.3 | 1 K.MFDSSNYHGQDLLFK.D                                                                          |
| gi 47174861 r |                    | 2      | 6      | 11.20%  | 473      | 53194   |   |        |      | 10.1 peter pan homolog [Homo sapiens]                                                          |
| *             | HsFLAG-ARP6_Ti_1   | 4.2431 | 0.2263 | 1838.38 | 1838.032 | 5723.7  | 1 | 1207.6 | 73.3 | 4 R.NLEAYAANPHSFVTR.G                                                                          |
| *             | HsFlag-NUFIP_Ti_10 | 5.7895 | 0.4874 | 3804.64 | 3806.089 | 9108.7  | 1 | 1432.8 | 27.1 | 2 R.LQDISELLATGAGLSESEAEPDGDHNITELPQAVAGR.G                                                    |
| gi 21264355 r |                    | 3      | 6      | 11.20%  | 411      | 46649   |   |        |      | 4.9 SWI/SNF-related matrix-associated actin-dependent regulator of chromatin e1 [Homo sapiens] |
| *             | HsARP6-FLAG_Ti_1   | 2.5838 | 0.2819 | 1833.22 | 1834.166 | 6364.4  | 1 | 372.2  | 41.2 | 1 R.VTASSGITIPKPPKPPDK.P                                                                       |
| *             | HsFLAG-Lin9_Ti_20  | 3.7274 | 0.3553 | 1696.32 | 1696.903 | 7874.5  | 1 | 1347.7 | 71.4 | 2 K.AYHNSPAYLAYINAK.S                                                                          |
| *             | HsFLAG-FLJ20729_   | 4.1894 | 0.2755 | 1400.14 | 1400.531 | 8209.4  | 1 | 1396.7 | 70.8 | 3 K.IAAEIAQAEQAR.K                                                                             |
| gi 5902078 re |                    | 2      | 3      | 11.20%  | 107      | 12528   |   |        |      | 10.1 splicing factor, arginine/serine-rich 5 [Homo sapiens]                                    |
| *             | HsFLAG-ARP6_Ti_1   | 2.9489 | 0.1783 | 1310.34 | 1311.345 | 6552.4  | 2 | 794    | 68.2 | 1 R.DADDAVYELDQK.E                                                                             |
| *             | HsFLAG-ARP6_Ti_1   | 4.2602 | 0.2114 | 1311.16 | 1311.345 | 4880.4  | 1 | 1357.3 | 86.4 | 2 R.DADDAVYELDQK.E                                                                             |
| gi 11559929 r |                    | 5      | 7      | 11.10%  | 874      | 97718   |   |        |      | 5.5 coatomer protein complex, subunit gamma 1 [Homo sapiens]                                   |
| *             | HsFLAG-ARP6_Ti_1   | 3.7627 | 0.3119 | 1847.87 | 1847.128 | 10363.1 | 1 | 812.4  | 50   | 2 K.ELAPAVSVLQLFCSSPK.A                                                                        |
| *             | HsFLAG-Lin9_Ti_20  | 4.1204 | 0.2722 | 1245.36 | 1245.546 | 7097.9  | 1 | 1806.1 | 86.4 | 2 R.SIATLAITLLK.T                                                                              |
| *             | HsFLAG-p53-DNA-D   | 3.0689 | 0.155  | 1903.46 | 1903.287 | 9626.6  | 1 | 766.3  | 50   | 1 K.FGAQNEEMLPSILVLLK.R                                                                        |
| *             | HsFLAG-Lin9_Ti_20  | 3.5468 | 0.3106 | 2023.94 | 2023.303 | 4220.1  | 1 | 359.1  | 52.9 | 1 R.SLPYNQPGTCYTLVALPK.E                                                                       |
| *             | HsFLAG-Lin9_Ti_20  | 3.7251 | 0.2514 | 3800.83 | 3802.869 | 6642.5  | 3 | 372.9  | 21.1 | 1 K.DCDPTTGETDDEGYEDEYVLEDLEVTVADHIQK.V                                                        |
| gi 19923485 r |                    | 3      | 8      | 11.10%  | 432      | 51466   |   |        |      | 9.8 cisplatin resistance-associated overexpressed protein [Homo sapiens]                       |
| gi 52426743 r |                    | 3      | 8      | 11.10%  | 432      | 51466   |   |        |      | 9.8 cisplatin resistance-associated overexpressed protein [Homo sapiens]                       |
| *             | HsFLAG-Lin9_Ti_20  | 4.2332 | 0.3618 | 2014.85 | 2013.189 | 6166.4  | 1 | 997.2  | 63.3 | 4 K.YYLCGFCPAELFTNTR.S                                                                         |
| *             | HsFLAG-FLJ20309_   | 4.2281 | 0.4551 | 1715.66 | 1715.861 | 8625.2  | 1 | 1222.8 | 58.8 | 2 R.LALSQNNQSSGAAGPTGK.N                                                                       |
| *             | HsFLAG-Lin9_Ti_20  | 3.6864 | 0.3633 | 1500.12 | 1500.602 | 7477.6  | 1 | 1088.2 | 65.4 | 2 R.STTSTIESFAAQEK.Q                                                                           |
| gi 39930469 r |                    | 2      | 2      | 11.10%  | 306      | 35583   |   |        |      | 10 brix domain containing 1 [Homo sapiens]                                                     |
| *             | HsFLAG-TCF3_Ti_10  | 2.9287 | 0.2152 | 2061.1  | 2060.271 | 5801.7  | 1 | 355.4  | 46.9 | 1 K.NITRPFEDQTSLEFFSK.K                                                                        |
| *             | HsFlag-FLJ20643_Ti | 2.9509 | 0.1536 | 2002.29 | 2005.206 | 7701.1  | 1 | 1002.2 | 59.4 | 1 K.PMLIFAGDDFDVTDYR.R                                                                         |
| gi 27764863 r |                    | 5      | 10     | 11.10%  | 298      | 32926   |   |        |      | 9.7 solute carrier family 25, member A6 [Homo sapiens]                                         |
| gi 4502099 re |                    | 5      | 10     | 11.10%  | 298      | 32895   |   |        |      | 9.7 solute carrier family 25, member 5 [Homo sapiens]                                          |
| *             | HsFLAG-TIP49b_Ti_  | 2.5219 | 0.292  | 1136.57 | 1137.368 | 5845.8  | 9 | 464.8  | 66.7 | 2 K.LLLQVQHASK.Q                                                                               |
| *             | HsFLAG-ARP6_Ti_1   | 2.6013 | 0.2171 | 1122.3  | 1122.269 | 4917    | 1 | 646.5  | 81.2 | 1 K.EQGVLFSWR.G                                                                                |

|               |                    |        |        |         |          |                                                                                                |   |        |      |                                                |
|---------------|--------------------|--------|--------|---------|----------|------------------------------------------------------------------------------------------------|---|--------|------|------------------------------------------------|
|               | HsFLAG-TCF3_Ti_10  | 2.9251 | 0.3102 | 1447.57 | 1447.676 | 5723.7                                                                                         | 1 | 451.2  | 54.5 | 2 R.YFPTQALNFAFK.D                             |
|               | HsFLAG-ARP6_Ti_1   | 3.3748 | 0.2596 | 1448.12 | 1447.676 | 4592.9                                                                                         | 1 | 871.3  | 81.8 | 4 R.YFPTQALNFAFK.D                             |
|               | HsSrcap_Ti_204.285 | 3.3103 | 0.3503 | 1691.17 | 1690.939 | 4362.7                                                                                         | 1 | 527.1  | 65.4 | 1 R.YFPTQALNFAFKDK.Y                           |
| gij38490531 r | 4                  | 6      | 11.00% | 1082    | 120237   | 7.3 splicing factor, arginine/serine-rich 14 [Homo sapiens]                                    |   |        |      |                                                |
| gij62859987 r | 4                  | 6      | 11.00% | 1082    | 120237   | 7.3 splicing factor, arginine/serine-rich 14 [Homo sapiens]                                    |   |        |      |                                                |
|               | HsFLAG-Lin9_Ti_20  | 6.2315 | 0.5049 | 3936.37 | 3937.1   | 10082.2                                                                                        | 1 | 1695.6 | 28.6 | 1 R.GSWEQDFGHPVQSQESSWSQEYSEYSGPSAVLGDGFGSSR.L |
|               | HsFLAG-ARP6_Ti_1   | 3.1168 | 0.1477 | 2203.51 | 2203.464 | 7629.2                                                                                         | 2 | 593.2  | 42.1 | 1 K.TLSNPLDLALALETNSLCR.K                      |
|               | HsFlag-NUFIP_Ti_10 | 4.6603 | 0.4006 | 2978.15 | 2977.343 | 5235.1                                                                                         | 1 | 485.9  | 37   | 2 K.ILEAVGLQDIAPSPAAPFNEDSTLFRG.E              |
|               | HsFLAG-Lin9_Ti_20  | 3.5337 | 0.1825 | 4013.1  | 4012.337 | 4841.5                                                                                         | 1 | 278.1  | 19.1 | 2 R.FVAQVGPETIEQFSIENSTDNPDWLWFLHDQNSSAFK.F    |
| gij6912478 re | 4                  | 6      | 11.00% | 536     | 60030    | 5 karyopherin alpha 6 [Homo sapiens]                                                           |   |        |      |                                                |
| *             | HsFlag-FLJ90652_2  | 5.0192 | 0.4673 | 2090.83 | 2091.462 | 7644.9                                                                                         | 1 | 1685.7 | 67.6 | 2 R.DYVLNCSILNPLLLTLTK.S                       |
|               | HsFLAG-TIP49a_Ti_  | 3.4162 | 0.2619 | 1393.24 | 1392.617 | 5742.1                                                                                         | 1 | 859.8  | 72.7 | 1 K.PLCDLLTVMDSK.I                             |
|               | HsFLAG-Lin9_Ti_20  | 5.0013 | 0.2717 | 1553.05 | 1552.858 | 10861.1                                                                                        | 1 | 2767   | 80.8 | 2 K.IVQVALNGLNLR.L                             |
|               | HsFlag-FLJ90652_2  | 4.8161 | 0.3707 | 1909.07 | 1907.09  | 9756.6                                                                                         | 1 | 2054.1 | 75   | 1 K.IEFLQSHENQEIQK.A                           |
| gij25777602 r | 7                  | 18     | 10.90% | 908     | 100200   | 5.2 proteasome 26S non-ATPase subunit 2 [Homo sapiens]                                         |   |        |      |                                                |
| *             | HsFLAG-ARP6_Ti_1   | 3.8778 | 0.2656 | 2218.74 | 2219.416 | 7186.5                                                                                         | 1 | 1252.9 | 36.4 | 2 K.APVQPQQSPAAPGGTDEKPSGK.E                   |
| *             | HsFLAG-TIP49b_Ti_  | 4.4283 | 0.3958 | 2218.85 | 2219.416 | 7381.6                                                                                         | 1 | 888.5  | 47.7 | 1 K.APVQPQQSPAAPGGTDEKPSGK.E                   |
| *             | HsFlag-VPS71_Ti_10 | 2.9699 | 0.3226 | 1960.86 | 1961.141 | 7346.4                                                                                         | 1 | 576.8  | 43.8 | 2 R.LVGSQEELASWGHEYVR.H                        |
| *             | HsFlag-FLJ90652_2  | 2.841  | 0.2702 | 1167.66 | 1168.208 | 7256                                                                                           | 1 | 986.2  | 77.3 | 2 R.FGGSGSQVDSAR.M                             |
| *             | HsFLAG-ARP6_Ti_1   | 3.5258 | 0.2868 | 1038.01 | 1038.235 | 5466.4                                                                                         | 1 | 1302.7 | 94.4 | 2 R.LAQGLTHLGK.G                               |
| *             | HsFlag-FLJ90652_2  | 4.8218 | 0.3492 | 1453.26 | 1453.682 | 7097                                                                                           | 1 | 1679.9 | 78.6 | 7 R.VGQAVDVVGQAGKPK.T                          |
| *             | HsFlag-VPS71_Ti_10 | 3.7639 | 0.3148 | 2460.21 | 2458.901 | 3355.5                                                                                         | 4 | 245.1  | 38.1 | 2 R.AELATEEFLPVTILEGFVILR.K                    |
| gij21614499 r | 6                  | 14     | 10.90% | 586     | 69413    | 6.3 villin 2 [Homo sapiens]                                                                    |   |        |      |                                                |
| *             | HsFlag-VPS71_Ti_10 | 5.1741 | 0.4016 | 2038.17 | 2039.246 | 6427.1                                                                                         | 1 | 1579.1 | 75   | 5 K.FYPEDVAEELIQDITQK.L                        |
|               | HsFLAG-p53-DNA-D   | 2.5927 | 0.1817 | 1105.13 | 1105.282 | 3983.4                                                                                         | 2 | 598.4  | 87.5 | 1 K.IGFPWSEIR.N                                |
|               | HsFLAG-p53-DNA-D   | 3.082  | 0.2462 | 1310.92 | 1311.526 | 4859.6                                                                                         | 1 | 673.5  | 75   | 2 K.KAPDFVIFYAPR.L                             |
|               | HsFlag-VPS71_Ti_10 | 4.0952 | 0.4189 | 1184.54 | 1183.352 | 5649.2                                                                                         | 1 | 979.7  | 83.3 | 2 K.APDFVIFYAPR.L                              |
|               | HsFlag-VPS71_Ti_10 | 3.4434 | 0.2393 | 1473.57 | 1473.731 | 4190                                                                                           | 1 | 702.4  | 81.8 | 3 R.RKPDTIEVQQMK.A                             |
| *             | HsFLAG-FLJ20729_   | 4.2273 | 0.4108 | 1652.6  | 1652.799 | 6881.1                                                                                         | 1 | 1491.1 | 71.4 | 1 K.SQEQLAAELAEYTAK.I                          |
| gij5729842 re | 1                  | 2      | 10.90% | 184     | 20720    | 5.5 glyoxalase I [Homo sapiens]                                                                |   |        |      |                                                |
| *             | HsFLAG-FLJ20729_   | 3.6793 | 0.325  | 2303.61 | 2304.607 | 5769.4                                                                                         | 1 | 652.9  | 52.6 | 2 K.GLAFIQDPDGYWIEILNPNK.M                     |
| gij23308577 r | 3                  | 5      | 10.70% | 533     | 56651    | 6.7 phosphoglycerate dehydrogenase [Homo sapiens]                                              |   |        |      |                                                |
| *             | HsFLAG-Lin9_Ti_20  | 3.2663 | 0.3423 | 2048.02 | 2049.257 | 8832.2                                                                                         | 1 | 901.2  | 50   | 1 R.ALVDHENVISCPHLGASTK.E                      |
| *             | HsFLAG-ARP6_Ti_1   | 3.9403 | 0.3677 | 1627.69 | 1626.903 | 5242.6                                                                                         | 2 | 722.8  | 60   | 3 K.NAGNCLSPAVIVGLLK.E                         |
| *             | HsFLAG-p53-DNA-D   | 3.4955 | 0.2113 | 2275.91 | 2273.668 | 8091                                                                                           | 1 | 729.7  | 47.6 | 1 R.TQSDPAMLPTMIGLLAEAGVR.L                    |
| gij21264351 r | 3                  | 5      | 10.70% | 475     | 54184    | 9.5 SWI/SNF-related matrix-associated actin-dependent regulator of chromatin d2 [Homo sapiens] |   |        |      |                                                |
| *             | HsFLAG-Lin9_Ti_20  | 4.1559 | 0.3608 | 2733.76 | 2734.128 | 8505.9                                                                                         | 1 | 750.5  | 28.1 | 1 K.LAGLLQHPDPIVINHVISVDPNDQK.K                |
| *             | HsFLAG-p53-DNA-D   | 3.5408 | 0.2051 | 1731.99 | 1731.911 | 4628.8                                                                                         | 2 | 696.1  | 64.3 | 2 R.AAFYHQPWAQEAAGR.H                          |
| *             | HsFLAG-Lin9_Ti_20  | 3.2849 | 0.2464 | 1341.14 | 1341.553 | 9785.7                                                                                         | 2 | 852.1  | 65   | 2 R.RQELEQVLGIR.L                              |
| gij4759100 re | 4                  | 13     | 10.70% | 484     | 53542    | 10.5 splicing factor p54 [Homo sapiens]                                                        |   |        |      |                                                |
| *             | HsFLAG-p53-DNA-D   | 3.9985 | 0.1503 | 2370.14 | 2369.599 | 9159.2                                                                                         | 1 | 745.2  | 45   | 1 K.FHDPDSAVVAQHLTNTVFVDR.A                    |
| *             | HsFlag-VPS71_Ti_10 | 3.8541 | 0.2992 | 1786.93 | 1785.09  | 3940.2                                                                                         | 1 | 724.7  | 62.5 | 3 R.ALIVVPYAEGVIPDEAK.A                        |
| *             | HsFlag-VPS71_Ti_10 | 3.8824 | 0.3346 | 1406.66 | 1406.668 | 5113.4                                                                                         | 1 | 900.5  | 73.1 | 2 K.LNHVAAGLVSPSLK.S                           |



|               |                    |        |        |         |          |                                                                                                      |   |        |      |                                     |
|---------------|--------------------|--------|--------|---------|----------|------------------------------------------------------------------------------------------------------|---|--------|------|-------------------------------------|
| *             | HsFlag-NUFIP_Ti_11 | 4.0343 | 0.3136 | 1407.28 | 1406.668 | 6103.1                                                                                               | 1 | 1007.4 | 69.2 | 7 K.LNHVAAGLVSPSLK.S                |
| gi 23397429 r | 3                  | 5      | 10.70% | 374     | 42503    | 5.6 B5 receptor [Homo sapiens]                                                                       |   |        |      |                                     |
| *             | HsARP6-FLAG_Ti_1   | 2.8413 | 0.2224 | 1517.38 | 1516.799 | 8786.1                                                                                               | 2 | 677.6  | 58.3 | 1 R.LQLLSNLFHGMDK.N                 |
| *             | HsFLAG-Lin9_Ti_20  | 5.0311 | 0.4646 | 2047    | 2046.414 | 6561.5                                                                                               | 1 | 1223.2 | 61.8 | 3 K.FLEGELIHDLITIFVSAK.L            |
| *             | HsFlag-VPS71_Ti_10 | 2.539  | 0.2525 | 1022.45 | 1022.152 | 4907.7                                                                                               | 1 | 779.9  | 81.2 | 1 K.VVVSHSTHR.T                     |
| gi 51479192 r | 3                  | 5      | 10.60% | 406     | 42429    | 5.6 ring finger protein 1 [Homo sapiens]                                                             |   |        |      |                                     |
| *             | HsFLAG-p53-DNA-D   | 3.5612 | 0.1582 | 1573.08 | 1573.789 | 5002.7                                                                                               | 4 | 434.1  | 53.8 | 3 R.SLRPDPNFDALISK.I                |
| *             | HsFLAG-TCF3_Ti_10  | 3.4395 | 0.3901 | 1783.22 | 1782.951 | 7154.1                                                                                               | 1 | 805.3  | 63.3 | 1 R.LHNQQALSSSIEEGLR.M              |
| *             | HsFLAG-TCF3_Ti_10  | 3.1131 | 0.1647 | 1534.15 | 1534.762 | 4224                                                                                                 | 1 | 427    | 58.3 | 1 K.VSRPLELCYAPTK.D                 |
| gi 22547136 r | 2                  | 4      | 10.60% | 311     | 34919    | 9.7 mitochondrial ribosomal protein L4 isoform a [Homo sapiens]                                      |   |        |      |                                     |
| gi 22547138 r | 2                  | 4      | 10.60% | 311     | 34919    | 9.7 mitochondrial ribosomal protein L4 isoform a [Homo sapiens]                                      |   |        |      |                                     |
| *             | HsFlag-NUFIP_Ti_10 | 4.0413 | 0.3419 | 1679.57 | 1679.916 | 4102                                                                                                 | 1 | 1045   | 73.3 | 2 R.VGLADLHPDVFATAPR.L              |
| *             | HsFLAG-ARP6_Ti_1   | 3.7272 | 0.2904 | 1926.02 | 1926.263 | 7065.9                                                                                               | 1 | 830.8  | 56.2 | 2 K.HQTLVLTLPVAFLEDK.L              |
| gi 21265084 r | 2                  | 2      | 10.60% | 303     | 34453    | 8.1 mitochondrial ribosomal protein L1 [Homo sapiens]                                                |   |        |      |                                     |
| *             | HsFLAG-ARP6_Ti_1   | 2.7848 | 0.2105 | 1325.01 | 1324.563 | 7324.2                                                                                               | 3 | 674.8  | 65   | 1 K.KFQILDFTSPK.Q                   |
| *             | HsFLAG-ARP6_Ti_1   | 3.0728 | 0.3147 | 2352.34 | 2353.677 | 5739.8                                                                                               | 1 | 383.7  | 40   | 1 K.NVEPFTSVLSLPYPFASEINK.V         |
| gi 4758788 re | 2                  | 2      | 10.60% | 264     | 30242    | 7.5 NADH dehydrogenase (ubiquinone) Fe-S protein 3, 30kDa (NADH-coenzyme Q reductase) [Homo sapiens] |   |        |      |                                     |
| *             | HsFLAG-ARP6_Ti_1   | 3.2611 | 0.4394 | 1554.03 | 1552.729 | 8127.5                                                                                               | 1 | 1180.8 | 66.7 | 1 R.ILTDYGFEGHPFR.K                 |
| *             | HsSrcap_Ti_204.327 | 2.9432 | 0.2699 | 1869.92 | 1870.117 | 8607.7                                                                                               | 3 | 476.1  | 46.4 | 1 R.KFDLNSPWEAFVYR.Q                |
| gi 56549119 r | 6                  | 12     | 10.50% | 866     | 97652    | 7.6 dynamin 2 isoform 3 [Homo sapiens]                                                               |   |        |      |                                     |
| gi 56549121 r | 6                  | 12     | 10.50% | 870     | 98064    | 7.5 dynamin 2 isoform 1 [Homo sapiens]                                                               |   |        |      |                                     |
| *             | HsFLAG-Lin9_Ti_20  | 5.4719 | 0.3074 | 2984.84 | 2985.29  | 9993.2                                                                                               | 1 | 1890.9 | 33   | 3 K.LQDAFSSIGQSCHLDLPQIAVVGQSAGK.S  |
| *             | HsFLAG-Lin9_Ti_20  | 3.1219 | 0.3454 | 1271.87 | 1272.369 | 6897.2                                                                                               | 1 | 779.9  | 72.2 | 1 K.TEHAFLHCK.S                     |
| *             | HsFLAG-Lin9_Ti_20  | 3.0938 | 0.3188 | 1698.37 | 1698.913 | 5841.8                                                                                               | 1 | 1047.5 | 67.9 | 1 K.VPVGDQPPDIEYQIK.D               |
| *             | HsFLAG-Lin9_Ti_20  | 3.2367 | 0.3029 | 1337.8  | 1338.509 | 7309.4                                                                                               | 1 | 873.8  | 75   | 2 K.TLNQQLTNHIR.E                   |
| *             | HsFLAG-Lin9_Ti_20  | 3.0271 | 0.3096 | 1623.38 | 1622.902 | 4172                                                                                                 | 1 | 538.5  | 64.3 | 1 R.TGLFTPDLAFEIVK.K                |
| *             | HsFLAG-Lin9_Ti_20  | 3.6557 | 0.2565 | 1362.44 | 1362.531 | 5007.3                                                                                               | 1 | 953.8  | 85   | 4 K.HVFAIFNTEQR.N                   |
| gi 5032067 re | 1                  | 2      | 10.50% | 153     | 17561    | 9.4 Sin3A-associated protein, 18kDa [Homo sapiens]                                                   |   |        |      |                                     |
| *             | HsFLAG-Lin9_Ti_20  | 3.6432 | 0.2977 | 1834.21 | 1834.082 | 7663.6                                                                                               | 1 | 1053.3 | 60   | 2 K.FQIGDYLDIAITPPNR.A              |
| gi 27597090 r | 8                  | 12     | 10.40% | 1726    | 199071   | 4.9 suppressor of Ty 6 homolog [Homo sapiens]                                                        |   |        |      |                                     |
| *             | HsFLAG-p53-DNA-D   | 4.3536 | 0.3686 | 2586    | 2586.725 | 10965.5                                                                                              | 1 | 1218.7 | 45.2 | 1 R.TSFDDRLEDDDFLIEENLGVK.V         |
| *             | HsFlag-NUFIP_Ti_10 | 2.5463 | 0.2336 | 3113.07 | 3112.33  | 9215.6                                                                                               | 3 | 315.2  | 25   | 1 K.LPGYDAAALQEAQEIFGVDFDYDEFEK.Y   |
| *             | HsFlag-NUFIP_Ti_10 | 3.2416 | 0.3497 | 1668.09 | 1668.895 | 7421.2                                                                                               | 1 | 1238.2 | 75   | 2 R.NQHFEVPIAFYR.K                  |
| *             | HsARP6-FLAG_Ti_1   | 4.807  | 0.4113 | 1537.35 | 1536.635 | 7420.4                                                                                               | 1 | 2171.2 | 87.5 | 2 K.DLDAFAEELER.Q                   |
| *             | HsFlag-NUFIP_Ti_10 | 3.1889 | 0.3412 | 1366.97 | 1367.601 | 8603.5                                                                                               | 1 | 1028.4 | 68.2 | 2 K.LIICNVTGIAHR.R                  |
| *             | HsFlag-NUFIP_Ti_10 | 5.2543 | 0.3866 | 4654.92 | 4656.877 | 8960.6                                                                                               | 1 | 960.8  | 23.1 | 2 VK.T                              |
| *             | HsFLAG-UTX1_Ti_20  | 3.8119 | 0.373  | 2211.56 | 2211.483 | 6055.4                                                                                               | 1 | 713    | 55   | 1 R.TRTPASINATPANINLADLTR.A         |
| *             | HsFlag-NUFIP_Ti_10 | 4.6752 | 0.3239 | 3327.81 | 3327.807 | 8406.3                                                                                               | 1 | 881.9  | 26.7 | 1 R.LTPRPSPMIESTPMSIAGDATPLLEDMDR.- |
| gi 21361368 r | 5                  | 9      | 10.40% | 795     | 87302    | 7.1 pyrroline-5-carboxylate synthetase isoform 1 [Homo sapiens]                                      |   |        |      |                                     |
| gi 62912457 r | 5                  | 9      | 10.50% | 793     | 87089    | 7.1 pyrroline-5-carboxylate synthetase isoform 2 [Homo sapiens]                                      |   |        |      |                                     |
| *             | HsFLAG-Lin9_Ti_20  | 4.4247 | 0.3317 | 2505.98 | 2504.75  | 8116.8                                                                                               | 1 | 938.5  | 43.5 | 4 K.TDLLIVLSDVEGLFDSPPGSDDAK.L      |
| *             | HsFLAG-FLJ20729_   | 3.5756 | 0.3643 | 2029.78 | 2030.285 | 4087.7                                                                                               | 1 | 626.3  | 58.8 | 2 K.LIDIFYPGDQQSVTFGTK.S            |
| *             | HsFLAG-Lin9_Ti_20  | 3.1775 | 0.3066 | 1355.72 | 1354.546 | 9254.3                                                                                               | 1 | 1029.9 | 62.5 | 1 K.VSGHVITDIVEGK.K                 |

|               |                    |        |        |         |          |                                                                                 |   |        |      |    |                                         |
|---------------|--------------------|--------|--------|---------|----------|---------------------------------------------------------------------------------|---|--------|------|----|-----------------------------------------|
|               | HsFLAG-FLJ20729_   | 5.0129 | 0.4178 | 1772.64 | 1773.129 | 7509.3                                                                          | 1 | 1724.2 | 73.3 | 1  | R.ILHLLTQEALSIHGK.E                     |
|               | HsFLAG-FLJ20729_   | 3.1173 | 0.1932 | 1462.41 | 1462.747 | 6377.1                                                                          | 1 | 677.3  | 63.6 | 1  | R.TPLFDQIIDMLR.V                        |
| gi 4757790 re | 4                  | 5      | 10.40% | 628     | 68683    | 5.7 ash2 (absent, small, or homeotic)-like [Homo sapiens]                       |   |        |      |    |                                         |
| *             | HsARP6-FLAG_Ti_1   | 2.8687 | 0.3707 | 2108.31 | 2109.3   | 5086.2                                                                          | 1 | 379.7  | 44.4 | 1  | K.FGLLDQDLSNIGPAYDNQK.Q                 |
| *             | HsFLAG-FLJ20729_   | 3.8066 | 0.2217 | 1474.36 | 1474.79  | 9276.4                                                                          | 1 | 1051.3 | 66.7 | 1  | R.VLLALHDRAPQLK.I                       |
| *             | HsScrap_Ti_103.290 | 3.6102 | 0.3697 | 1957.87 | 1958.224 | 4645.6                                                                          | 1 | 525.8  | 52.9 | 2  | R.LGWSQPLGNLQAPLGYDK.F                  |
| *             | HsFLAG-FLJ20729_   | 2.5013 | 0.3651 | 1762.41 | 1763.043 | 5665.6                                                                          | 1 | 594    | 57.1 | 1  | K.DIFEGVYFPAISLYK.S                     |
| gi 18201905 r | 4                  | 10     | 10.40% | 558     | 63147    | 8.3 glucose phosphate isomerase [Homo sapiens]                                  |   |        |      |    |                                         |
| *             | HsFlag-VPS71_Ti_10 | 5.11   | 0.4322 | 1833.97 | 1833.135 | 4104                                                                            | 1 | 1038.3 | 71.9 | 4  | K.TLAQLNPRESSLFIASK.T                   |
| *             | HsFlag-VPS71_Ti_10 | 3.2089 | 0.2735 | 1219.47 | 1219.383 | 6166.6                                                                          | 1 | 1195.5 | 85   | 3  | K.HFVALSTNTTK.V                         |
| *             | HsFlag-VPS71_Ti_10 | 4.2453 | 0.4023 | 1706.09 | 1705.069 | 7340.7                                                                          | 1 | 1211.6 | 67.9 | 1  | K.ILLANFLAQTEALMR.G                     |
| *             | HsFLAG-p53-DNA-D   | 3.1696 | 0.2595 | 1709.56 | 1709.943 | 6618.9                                                                          | 1 | 849.2  | 64.3 | 2  | K.VFEGNRPTNSIVFTK.L                     |
| gi 8923900 re | 3                  | 14     | 10.40% | 434     | 48379    | 7.9 cytidine 5'-monophosphate N-acetylneuraminic acid synthetase [Homo sapiens] |   |        |      |    |                                         |
| *             | HsFLAG-FLJ20729_   | 2.9876 | 0.2139 | 1585.09 | 1585.933 | 3559.5                                                                          | 1 | 470.6  | 60.7 | 3  | R.GVEKPPHLAALILAR.G                     |
| *             | HsFLAG-p53-DNA-D   | 3.8234 | 0.3455 | 1431.76 | 1431.767 | 4996.3                                                                          | 1 | 1207.5 | 87.5 | 4  | K.HLAGVPLIGWVLR.A                       |
| *             | HsFLAG-FLJ20729_   | 4.8034 | 0.4211 | 1690.26 | 1689.832 | 6784.4                                                                          | 1 | 1409.3 | 71.9 | 7  | K.RVGLSGAPADACSTAQK.A                   |
| gi 17158023 r | 1                  | 2      | 10.40% | 230     | 25456    | 11.1 hypothetical protein LOC85395 [Homo sapiens]                               |   |        |      |    |                                         |
| *             | HsYL1-FLAG_Ti_203  | 3.4849 | 0.4636 | 2109.96 | 2110.331 | 5062.1                                                                          | 1 | 434.9  | 43.5 | 2  | K.GEAAPGPAPPAPEATPPPASAAGK.D            |
| gi 4503747 re | 17                 | 42     | 10.30% | 2602    | 278193   | 5.7 filamin B, beta (actin binding protein 278) [Homo sapiens]                  |   |        |      |    |                                         |
|               | HsFLAG-p53-DNA-D   | 4.3406 | 0.3465 | 1227.4  | 1227.53  | 5275.5                                                                          | 1 | 1365.1 | 90   | 13 | R.LIALLEVLSQK.R                         |
|               | HsFLAG-p53-DNA-D   | 3.4629 | 0.0813 | 972.27  | 972.175  | 2910.7                                                                          | 4 | 584.7  | 92.9 | 2  | R.LLGWIQNK.I                            |
| *             | HsFlag-VPS71_Ti_10 | 4.6192 | 0.4871 | 2048.22 | 2049.293 | 4304.6                                                                          | 1 | 1004.8 | 71.9 | 3  | K.IPYLPITNFNQNWQDGK.A                   |
| *             | HsFlag-VPS71_Ti_10 | 3.3623 | 0.2905 | 1657.69 | 1657.654 | 8924                                                                            | 1 | 1444.5 | 69.2 | 1  | K.IEYNDQNDGSCDVK.Y                      |
| *             | HsARP6-FLAG_Ti_1   | 2.829  | 0.115  | 1563.24 | 1562.809 | 5048.8                                                                          | 1 | 458.6  | 53.8 | 2  | K.VLFASQEIPASPFR.V                      |
| *             | HsFlag-VPS71_Ti_10 | 3.5127 | 0.333  | 1502.89 | 1502.751 | 5467.9                                                                          | 1 | 762.8  | 60.7 | 1  | K.SPFTVGVAAPLDLSK.I                     |
| *             | HsFlag-VPS71_Ti_10 | 2.6752 | 0.2912 | 1150.65 | 1151.308 | 4981.9                                                                          | 1 | 374    | 59.1 | 1  | K.VVASGPGLEHGK.V                        |
| *             | HsFlag-VPS71_Ti_10 | 3.0844 | 0.2722 | 1151.54 | 1151.308 | 7903.2                                                                          | 1 | 1634.3 | 86.4 | 2  | K.VVASGPGLEHGK.V                        |
| *             | HsFlag-VPS71_Ti_10 | 4.3539 | 0.3557 | 2228.7  | 2227.522 | 7038.4                                                                          | 1 | 1346.9 | 57.9 | 2  | K.GLHVVEVYDDVPIPNPFK.V                  |
| *             | HsFlag-VPS71_Ti_10 | 3.9396 | 0.2999 | 2548.87 | 2548.855 | 4019.7                                                                          | 1 | 463.2  | 42   | 2  | K.VTASGPGGLSSYGVPASLPVDFDAIDAR.D        |
| *             | HsFLAG-ARP6_Ti_1   | 3.15   | 0.4221 | 1342.99 | 1343.476 | 7496                                                                            | 1 | 1011.6 | 68.2 | 2  | K.DGTYAVTYIPDK.T                        |
| *             | HsFlag-VPS71_Ti_10 | 2.6776 | 0.1757 | 2314.72 | 2314.604 | 4237.4                                                                          | 3 | 240.8  | 35   | 1  | K.DGTCTVTYLPDGLDYSILVK.Y                |
| *             | HsFlag-VPS71_Ti_10 | 4.1548 | 0.3337 | 2470.41 | 2468.761 | 6202.5                                                                          | 1 | 610.8  | 41.3 | 3  | K.LGSAADFLDISETDLSSLTASIK.A             |
| *             | HsFLAG-Lin9_Ti_203 | 3.5078 | 0.2965 | 1634.51 | 1634.925 | 9134.3                                                                          | 1 | 2127.1 | 84.6 | 2  | K.RLPNNHIGISFIPR.E                      |
| *             | HsFLAG-Lin9_Ti_203 | 4.715  | 0.4717 | 1645.64 | 1645.86  | 4993.5                                                                          | 1 | 797.2  | 63.3 | 1  | R.APSVATVGSICDLNLK.I                    |
| *             | HsFLAG-p53-DNA-D   | 5.2767 | 0.364  | 2309.51 | 2309.546 | 6714.6                                                                          | 1 | 1231.1 | 38.6 | 2  | R.GQHVTGSPFQFTVGPLGEGGAHK.V             |
| *             | HsFLAG-ARP6_Ti_1   | 3.0376 | 0.2058 | 2273.29 | 2273.427 | 6012.1                                                                          | 1 | 690.3  | 45   | 2  | K.NGSCGVSYIAQEPGNYEVSIFK.F              |
| gi 7656991 re | 2                  | 7      | 10.30% | 474     | 53249    | 7.1 coronin, actin binding protein, 1C [Homo sapiens]                           |   |        |      |    |                                         |
| *             | HsFlag-VPS71_Ti_10 | 3.2331 | 0.3686 | 2441.98 | 2441.656 | 6578.1                                                                          | 1 | 683.5  | 47.4 | 1  | R.YFEITDESPYVHYLNTFSSK.E                |
| *             | HsFLAG-p53-DNA-D   | 5.6925 | 0.3589 | 3272.05 | 3273.49  | 9159.8                                                                          | 1 | 1679.5 | 33   | 6  | R.KSDFQDDLYPDTAGPEAALEAEWFEK.N          |
| gi 7657647 re | 1                  | 3      | 10.30% | 351     | 39595    | 5.3 tropomodulin 2 (neuronal) [Homo sapiens]                                    |   |        |      |    |                                         |
| *             | HsFLAG-Lin9_Ti_203 | 5.2422 | 0.2601 | 3835.86 | 3837.273 | 6833.1                                                                          | 1 | 653.7  | 22.1 | 3  | K.VTLDPELEEALASASDTELYDLAAVLGVHLLNPNK.F |
| gi 8923405 re | 2                  | 4      | 10.30% | 252     | 29591    | 9.2 RNA (guanine-9-) methyltransferase domain containing 1 [Homo sapiens]       |   |        |      |    |                                         |
| *             | HsScrap_Ti_204.301 | 2.8934 | 0.4203 | 1667.29 | 1667.871 | 7709.3                                                                          | 1 | 1093.9 | 66.7 | 1  | R.NVDPFHIFCNLKI                         |

|               |                    |        |        |         |          |         |                                                                                                    |        |      |   |                                         |
|---------------|--------------------|--------|--------|---------|----------|---------|----------------------------------------------------------------------------------------------------|--------|------|---|-----------------------------------------|
| *             | HsSrcap_Ti_204.205 | 4.2104 | 0.2913 | 1543.53 | 1543.77  | 5382.2  | 1                                                                                                  | 1226.7 | 83.3 | 3 | K.RLNLATECLPLDK.Y                       |
| gi 4502787 re | 1                  | 2      | 10.30% | 116     | 13075    | 8.2     | glycoprotein hormones, alpha polypeptide precursor [Homo sapiens]                                  |        |      |   |                                         |
| *             | HsYL1_Ti_101.1286. | 3.1348 | 0.274  | 1357.36 | 1356.405 | 5565.1  | 1                                                                                                  | 1438.8 | 86.4 | 2 | K.NVTSESTCCVAK.S                        |
| gi 18034690 r | 2                  | 4      | 10.20% | 384     | 43472    | 6       | hypothetical protein LOC25980 [Homo sapiens]                                                       |        |      |   |                                         |
| *             | HsFlag-ZnF-HIT2_Ti | 5.9212 | 0.3971 | 2182.14 | 2182.481 | 5452.5  | 1                                                                                                  | 920.6  | 61.1 | 2 | R.ANLQELDQFLGPYPYATLK.K                 |
| *             | HsFlag-ZnF-HIT2_Ti | 4.7579 | 0.512  | 2194.86 | 2195.492 | 5376.2  | 1                                                                                                  | 884    | 57.9 | 2 | R.FSELPTQMFPEGATPAEITK.H                |
| gi 4505753 re | 3                  | 4      | 10.20% | 254     | 28804    | 7.2     | phosphoglycerate mutase 1 (brain) [Homo sapiens]                                                   |        |      |   |                                         |
| gi 89036296 r | 3                  | 4      | 11.40% | 228     | 25881    | 6.3     | PREDICTED: similar to Phosphoglycerate mutase 1 (Phosphoglycerate mutase isozyme B) (PGAM-B) (BPG- |        |      |   |                                         |
| gi 89036292 r | 3                  | 4      | 10.20% | 254     | 28804    | 7.2     | PREDICTED: similar to Phosphoglycerate mutase 1 (Phosphoglycerate mutase isozyme B) (PGAM-B) (BPG- |        |      |   |                                         |
| gi 89035672 r | 3                  | 4      | 10.20% | 254     | 28850    | 7.2     | PREDICTED: similar to Phosphoglycerate mutase 1 (Phosphoglycerate mutase isozyme B) (PGAM-B) (BPG- |        |      |   |                                         |
| gi 89035650 r | 3                  | 4      | 11.40% | 228     | 25881    | 6.3     | PREDICTED: similar to Phosphoglycerate mutase 1 (Phosphoglycerate mutase isozyme B) (PGAM-B) (BPG- |        |      |   |                                         |
| gi 89035644 r | 3                  | 4      | 10.20% | 254     | 28804    | 7.2     | PREDICTED: similar to Phosphoglycerate mutase 1 (Phosphoglycerate mutase isozyme B) (PGAM-B) (BPG- |        |      |   |                                         |
| gi 50593010 r | 3                  | 4      | 10.30% | 253     | 28766    | 8.9     | phosphoglycerate mutase 2 (muscle) [Homo sapiens]                                                  |        |      |   |                                         |
|               | HsFLAG-ARP6_Ti_1   | 3.1016 | 0.2069 | 1685.17 | 1684.976 | 5090.6  | 3                                                                                                  | 621    | 65.4 | 2 | R.ALPFWNEEIVPQIK.E                      |
|               | HsFLAG-FLJ20729_   | 3.2529 | 0.3346 | 1306.89 | 1307.542 | 7976.6  | 1                                                                                                  | 874.5  | 68.2 | 1 | K.RVLIAAHGNSLR.G                        |
|               | HsH2AZ-FLAG_293_   | 3.2734 | 0.2751 | 1151.29 | 1151.354 | 5397.7  | 1                                                                                                  | 1002.2 | 80   | 1 | R.VLIAAHGNSLR.G                         |
| gi 54112390 r | 6                  | 14     | 10.10% | 1091    | 123183   | 5.2     | calcium channel, voltage-dependent, alpha 2/delta subunit 1 [Homo sapiens]                         |        |      |   |                                         |
| *             | HsFLAG-ARP6_Ti_1   | 3.7728 | 0.3476 | 1537.77 | 1537.71  | 8588.7  | 1                                                                                                  | 1112.7 | 65.4 | 1 | K.TASGVNQLVDIYEK.Y                      |
| *             | HsFLAG-ARP6_Ti_1   | 3.325  | 0.3491 | 1506.25 | 1506.745 | 3505.4  | 1                                                                                                  | 754.7  | 79.2 | 3 | R.IKPVFIEDANFGR.Q                       |
| *             | HsFLAG-ARP6_Ti_1   | 3.5043 | 0.2891 | 2231.35 | 2233.588 | 11501.2 | 1                                                                                                  | 913.5  | 47.4 | 1 | R.INTQEYLDVLRPMVLAGDK.A                 |
| *             | HsFLAG-ARP6_Ti_1   | 3.3679 | 0.4651 | 1943.74 | 1944.294 | 9898.9  | 1                                                                                                  | 797.6  | 50   | 1 | K.NQLILGVMGVDVSLEDIK.R                  |
| *             | HsFLAG-ARP6_Ti_1   | 4.1009 | 0.2399 | 3153.52 | 3153.573 | 5077.8  | 1                                                                                                  | 444.6  | 25   | 2 | R.FTLCPNGYYFAIDPNGYVLLHPNLQPK.N         |
| *             | HsFLAG-ARP6_Ti_1   | 5.1105 | 0.3739 | 2098.03 | 2098.363 | 9210.6  | 1                                                                                                  | 1783.3 | 64.7 | 6 | R.VLLDAGFTNELVQNYWSK.Q                  |
| gi 33457332 r | 2                  | 3      | 10.10% | 606     | 63877    | 8.5     | RAVER1 [Homo sapiens]                                                                              |        |      |   |                                         |
| *             | HsFLAG-Lin9_Ti_20  | 3.8915 | 0.2974 | 4425.41 | 4425.992 | 6146.5  | 1                                                                                                  | 521.5  | 21.7 | 2 | C                                       |
| *             | HsFLAG-Lin9_Ti_20  | 5.3801 | 0.3446 | 2388.41 | 2389.603 | 8862.8  | 1                                                                                                  | 1938.1 | 41.7 | 1 | R.ALSAVHSPTFCQLACGQDGLK.G               |
| gi 7705284 re | 4                  | 6      | 10.10% | 565     | 63177    | 5.8     | anaphase-promoting complex subunit 7 [Homo sapiens]                                                |        |      |   |                                         |
| *             | HsSrcap_Ti_204.177 | 2.6163 | 0.217  | 2572.71 | 2573.786 | 8789.6  | 2                                                                                                  | 564.6  | 34.8 | 1 | K.VRPSTGNSASTPQSQCPLPSEIEVK.Y           |
| *             | HsFlag-VPS71_Ti_1  | 5.0016 | 0.1834 | 2573.29 | 2573.786 | 6478    | 1                                                                                                  | 920.1  | 31.5 | 2 | K.VRPSTGNSASTPQSQCPLPSEIEVK.Y           |
| *             | HsFlag-VPS71_Ti_1  | 3.2714 | 0.3953 | 1912.02 | 1912.287 | 8108.2  | 1                                                                                                  | 799.9  | 52.9 | 1 | R.QCPLALDAILGLLSLSVK.G                  |
| *             | HsFLAG-FLJ20729_   | 5.0869 | 0.4424 | 1711.52 | 1711.912 | 8616.3  | 1                                                                                                  | 2445.6 | 82.1 | 2 | R.DNVDLLGSLADLYFR.A                     |
| gi 38570081 r | 2                  | 3      | 10.10% | 483     | 51617    | 8.5     | CUG triplet repeat, RNA-binding protein 1 isoform 2 [Homo sapiens]                                 |        |      |   |                                         |
| gi 71164871 r | 2                  | 3      | 10.10% | 486     | 52063    | 8.5     | CUG triplet repeat, RNA-binding protein 1 isoform 3 [Homo sapiens]                                 |        |      |   |                                         |
| gi 5729794 re | 2                  | 3      | 10.20% | 482     | 51546    | 8.5     | CUG triplet repeat, RNA-binding protein 1 isoform 1 [Homo sapiens]                                 |        |      |   |                                         |
|               | HsFlag-VPS71_Ti_1  | 3.5842 | 0.2416 | 1411.36 | 1411.619 | 7731    | 1                                                                                                  | 1263.3 | 70.8 | 1 | K.AALEAQNALHNMK.V                       |
|               | HsFlag-VPS71_Ti_1  | 5.9255 | 0.3702 | 4040.47 | 4041.585 | 8185.6  | 1                                                                                                  | 1364.5 | 27.9 | 2 | K.EGPEGANLFIYHLPQEFGDQDLLQMFMPFNVVSAK.V |
| gi 13899231 r | 2                  | 3      | 10.10% | 267     | 30243    | 10.1    | mitochondrial ribosomal protein L9 [Homo sapiens]                                                  |        |      |   |                                         |
| *             | HsFLAG-ARP6_Ti_1   | 3.2047 | 0.3236 | 1601.13 | 1600.855 | 4270.2  | 1                                                                                                  | 570.2  | 67.9 | 1 | R.LLPQGLAVYASPENK.K                     |
| *             | HsFLAG-ARP6_Ti_1   | 3.5868 | 0.2441 | 1248.16 | 1248.511 | 5754    | 1                                                                                                  | 1038.5 | 77.3 | 2 | K.NLGVVVAPHTLK.L                        |
| gi 4505317 re | 6                  | 11     | 10.00% | 1030    | 115281   | 5.4     | protein phosphatase 1, regulatory (inhibitor) subunit 12A [Homo sapiens]                           |        |      |   |                                         |
| *             | HsSrcap_Ti_204.180 | 2.9233 | 0.2736 | 1440.02 | 1439.574 | 4992.9  | 1                                                                                                  | 519.7  | 68.2 | 1 | R.QWLNSGHINDVR.H                        |
| *             | HsFLAG-Lin9_Ti_20  | 2.7263 | 0.2685 | 1826.31 | 1825.98  | 7058.3  | 1                                                                                                  | 779.7  | 56.7 | 1 | K.DYDGWTPPLHAAAHWGK.E                   |
| *             | HsSrcap_Ti_202.497 | 6.5588 | 0.4051 | 2453.38 | 2454.693 | 8262.1  | 1                                                                                                  | 2419.8 | 64.3 | 4 | K.VGQTAFDVADEDILGYLEELQK.K              |

|             |                    |        |        |         |          |        |   |        |      |    |                                                                     |
|-------------|--------------------|--------|--------|---------|----------|--------|---|--------|------|----|---------------------------------------------------------------------|
| *           | HsSrcap_Ti_202.497 | 5.2552 | 0.279  | 2454.42 | 2454.693 | 7914.3 | 1 | 1139.2 | 34.5 | 2  | K.VGQTAFDVADEDILGYLEELQK.K                                          |
| *           | HsSrcap_Ti_205.202 | 5.2302 | 0.3044 | 3782.98 | 3784.213 | 6212.4 | 1 | 1063.9 | 27.6 | 2  | K.TKPLASVTNANTSSTQAAPVAVTTPTVSSGQATPTSPIK.K                         |
| *           | HsSrcap_Ti_202.007 | 2.1395 | 0.2403 | 1368.44 | 1369.514 | 6462.5 | 1 | 628.7  | 61.5 | 1  | K.TGSYGALAEITASK.E                                                  |
| gi 21361734 | r                  | 4      | 14     | 10.00%  | 791      | 83296  |   |        |      |    | 9.4 hypothetical protein LOC55683 [Homo sapiens]                    |
| *           | HsFLAG-FLJ20436_   | 3.5147 | 0.3112 | 1315.32 | 1315.553 | 6041.2 | 1 | 1373.6 | 80.8 | 8  | K.TGAAGAEALSLLLK.R                                                  |
| *           | HsFLAG-FLJ20436_   | 3.705  | 0.2601 | 2270.77 | 2271.619 | 6473.6 | 1 | 721.9  | 43.2 | 2  | K.LPGSPLILIASSGPPSSSVFPTSR.R                                        |
| *           | HsFLAG-FLJ20436_   | 5.5572 | 0.5482 | 2205.39 | 2205.337 | 7538   | 1 | 1539.2 | 56.8 | 1  | K.LPASPSGSEDLSVSSSPTSSPK.T                                          |
| *           | HsFLAG-FLJ20436_   | 2.637  | 0.2502 | 1856.57 | 1856.13  | 4010.5 | 2 | 311    | 44.4 | 3  | K.LASSLPGLAQISNQASGLK.V                                             |
| gi 4826686  | re                 | 6      | 27     | 10.00%  | 740      | 82432  |   |        |      |    | 7.2 DEAD (Asp-Glu-Ala-Asp) box polypeptide 1 [Homo sapiens]         |
| *           | HsFLAG-FLJ20309_   | 2.7305 | 0.2501 | 1881.44 | 1880.235 | 3573.5 | 1 | 405    | 56.2 | 2  | K.TGAFSIPVIQIVYETLK.D                                               |
| *           | HsFLAG-FLJ20729_   | 6.0273 | 0.4328 | 2372.56 | 2373.624 | 9257.3 | 1 | 2296.6 | 43.8 | 3  | R.FLVLDEADGLLSQGYSDFINR.M                                           |
| *           | HsFLAG-p53-DNA-D   | 5.1215 | 0.5067 | 2373.13 | 2373.624 | 9600.9 | 1 | 1580.2 | 57.5 | 12 | R.FLVLDEADGLLSQGYSDFINR.M                                           |
| *           | HsFlag-VPS71_Ti_1( | 3.9975 | 0.2691 | 1907.36 | 1905.202 | 3758.5 | 1 | 576.9  | 58.8 | 5  | K.GHVDILAPTQVELAALEK.E                                              |
| *           | HsFLAG-p53-DNA-D   | 4.0412 | 0.2181 | 2135.5  | 2135.43  | 5529.7 | 1 | 1107.3 | 44.1 | 1  | K.EAQTSFLHLGYLPNQLFR.T                                              |
| *           | HsFLAG-p53-DNA-D   | 4.6455 | 0.4424 | 2135.66 | 2135.43  | 7262   | 1 | 982.3  | 50   | 4  | K.EAQTSFLHLGYLPNQLFR.T                                              |
| gi 19923502 | r                  | 3      | 4      | 10.00%  | 490      | 52513  |   |        |      |    | 10.5 GATA zinc finger domain containing 2A [Homo sapiens]           |
| *           | HsSrcap_Ti_202.006 | 3.1678 | 0.2142 | 2738.13 | 2737.894 | 7971.4 | 2 | 421.3  | 32.1 | 1  | K.GTTATSAQANSTPTSVASVVTSAESPASR.Q                                   |
| *           | HsSrcap_Ti_205.267 | 4.064  | 0.4234 | 1983.77 | 1984.303 | 8272.6 | 1 | 870.8  | 47.4 | 2  | K.TPLSTGGTLAFVSPSLAVHK.S                                            |
| *           | HsSrcap_Ti_205.266 | 5.3011 | 0.3645 | 1984.84 | 1984.303 | 6197.3 | 1 | 1146.3 | 40.8 | 1  | K.TPLSTGGTLAFVSPSLAVHK.S                                            |
| gi 5453682  | re                 | 1      | 2      | 10.00%  | 359      | 40623  |   |        |      |    | 4.9 HMBA-inducible [Homo sapiens]                                   |
| *           | HsSrcap_Ti_204.224 | 4.8487 | 0.3027 | 3836.48 | 3837.127 | 6109.4 | 1 | 1001.1 | 28.6 | 2  | R.AFPQLGGRPGPEGEGSLESQPPPLQTQACPESSCLR.E                            |
| gi 16751921 | r                  | 1      | 2      | 10.00%  | 110      | 11284  |   |        |      |    | 6.5 dermcidin precursor [Homo sapiens]                              |
| *           | HsH2AZ-FLAG_293_   | 2.7978 | 0.2124 | 1129.3  | 1129.172 | 5168.7 | 1 | 895.4  | 80   | 2  | K.ENAGEDPGLAR.Q                                                     |
| gi 24308085 | r                  | 3      | 7      | 9.90%   | 545      | 62717  |   |        |      |    | 6.1 monooxygenase, DBH-like 1 isoform 2 [Homo sapiens]              |
| gi 72534688 | r                  | 3      | 7      | 8.80%   | 613      | 69653  |   |        |      |    | 6.3 monooxygenase, DBH-like 1 isoform 1 [Homo sapiens]              |
|             | HsFLAG-ARP6_Ti_1   | 5.0148 | 0.4776 | 2532.23 | 2532.896 | 3968.1 | 1 | 700.2  | 54.5 | 2  | K.TSVLSTALPYFDLVNQDVPINPK.D                                         |
|             | HsFLAG-ARP6_Ti_1   | 2.9767 | 0.2319 | 1949.88 | 1950.267 | 3622.2 | 1 | 493.7  | 59.4 | 1  | R.CASIPDIMEQLQFIGVK.E                                               |
|             | HsFLAG-ARP6_Ti_1   | 3.8403 | 0.2483 | 1764.11 | 1764.12  | 7029   | 1 | 1054   | 65.4 | 4  | K.EIYRPVTTWPFIK.S                                                   |
| gi 24308009 | r                  | 2      | 3      | 9.90%   | 272      | 30369  |   |        |      |    | 6.6 methionyl aminopeptidase 1 [Homo sapiens]                       |
| *           | HsFLAG-ARP6_Ti_1   | 2.697  | 0.3306 | 1777.13 | 1777.94  | 4005.4 | 1 | 525.4  | 61.5 | 1  | R.NCYPSPLNYYNFPK.S                                                  |
| *           | HsFLAG-ARP6_Ti_1   | 2.8307 | 0.13   | 1495.28 | 1495.724 | 5589.3 | 2 | 643.3  | 66.7 | 2  | K.LFHTAPNVPHYAK.N                                                   |
| gi 37544743 | r                  | 1      | 2      | 9.90%   | 101      | 11741  |   |        |      |    | 11.3 PREDICTED: similar to 60S ribosomal protein L35 [Homo sapiens] |
| gi 89057079 | r                  | 1      | 2      | 7.40%   | 136      | 15556  |   |        |      |    | 10.6 PREDICTED: similar to 60S ribosomal protein L35 [Homo sapiens] |
| gi 89050566 | r                  | 1      | 2      | 7.40%   | 136      | 15556  |   |        |      |    | 10.6 PREDICTED: similar to 60S ribosomal protein L35 [Homo sapiens] |
| gi 89037172 | r                  | 1      | 2      | 9.90%   | 101      | 11741  |   |        |      |    | 11.3 PREDICTED: similar to 60S ribosomal protein L35 [Homo sapiens] |
| gi 6005860  | re                 | 1      | 2      | 8.10%   | 123      | 14551  |   |        |      |    | 11 ribosomal protein L35 [Homo sapiens]                             |
|             | HsFLAG-ARP6_Ti_1   | 3.3496 | 0.1776 | 1144.39 | 1144.357 | 7264.4 | 1 | 1285.3 | 88.9 | 2  | R.VLTVINQTQK.E                                                      |
| gi 4507943  | re                 | 6      | 10     | 9.80%   | 1071     | 123386 |   |        |      |    | 6.1 exportin 1 [Homo sapiens]                                       |
| *           | HsFLAG-Lin9_Ti_20  | 4.0457 | 0.2733 | 2542.52 | 2542.777 | 5392.4 | 1 | 1422.9 | 44   | 1  | K.LDINLLDNVVNCLYHGEQAQQR.M                                          |
| *           | HsFlag-FLJ90652_2  | 3.1333 | 0.2112 | 1170.76 | 1170.412 | 8248.7 | 1 | 1459.1 | 88.9 | 1  | R.MAQEVLTHLK.E                                                      |
| *           | HsFlag-VPS71_Ti_1( | 4.7147 | 0.4991 | 2149.99 | 2149.513 | 3904.1 | 1 | 738.3  | 64.7 | 4  | K.YMLLPNQVWDSIIQQATK.N                                              |
| *           | HsFlag-VPS71_Ti_1( | 3.8225 | 0.303  | 2888.82 | 2888.293 | 6917.4 | 2 | 499.5  | 34   | 2  | K.ISTSLNPGNPVNNQIFLQEYVANLLK.S                                      |
| *           | HsFlag-VPS71_Ti_1( | 3.1547 | 0.1972 | 1341.67 | 1341.509 | 6439.3 | 1 | 980    | 72.7 | 1  | K.SAFPHLQDAQVK.L                                                    |

|                |                      |        |        |         |          |                                                                                                                |   |        |      |   |                                     |
|----------------|----------------------|--------|--------|---------|----------|----------------------------------------------------------------------------------------------------------------|---|--------|------|---|-------------------------------------|
| *              | HsFLAG-p53-DNA-D     | 3.2159 | 0.3267 | 1911.28 | 1911.251 | 6247.9                                                                                                         | 1 | 902.3  | 59.4 | 1 | K.LFVTGLFSLNQDIPAFK.E               |
| gij 21361181 r | 8                    | 13     | 9.80%  | 1023    | 112896   | 5.5 Na <sup>+</sup> /K <sup>+</sup> -ATPase alpha 1 subunit isoform a proprotein [Homo sapiens]                |   |        |      |   |                                     |
|                | HsFLAG-ARP6_Ti_1     | 3.1708 | 0.2909 | 1106.13 | 1106.267 | 7553.7                                                                                                         | 9 | 1098.3 | 77.8 | 1 | K.TSATWLALSR.I                      |
|                | HsFLAG-ARP6_Ti_1     | 4.1322 | 0.2809 | 1585.15 | 1585.844 | 5336.2                                                                                                         | 1 | 1170.4 | 76.9 | 3 | R.AVFQANQENLPILK.R                  |
|                | HsFLAG-ARP6_Ti_1     | 3.672  | 0.3231 | 1610.01 | 1608.853 | 5790.1                                                                                                         | 1 | 882.3  | 69.2 | 2 | K.NPNTSEPHLLVMK.G                   |
|                | HsFLAG-ARP6_Ti_1     | 3.8026 | 0.338  | 1753.08 | 1753.909 | 9046                                                                                                           | 1 | 1867.4 | 70   | 2 | K.DAFQNAVLELGLGER.V                 |
|                | HsFLAG-ARP6_Ti_1     | 3.8098 | 0.393  | 1382.25 | 1382.661 | 6390.6                                                                                                         | 1 | 1135.2 | 75   | 2 | K.VIMVTGDHPITAK.A                   |
|                | HsFLAG-ARP6_Ti_1     | 3.3556 | 0.3146 | 1239.06 | 1237.445 | 3331.7                                                                                                         | 1 | 702.3  | 85   | 1 | R.LNIPVSQVNPR.D                     |
|                | HsFLAG-ARP6_Ti_1     | 3.1901 | 0.1796 | 1086.34 | 1086.199 | 3516                                                                                                           | 3 | 648.9  | 77.8 | 1 | K.ACIVHGSCLK.D                      |
| *              | HsFLAG-ARP6_Ti_1     | 4.0016 | 0.2496 | 1408.11 | 1408.563 | 7982.1                                                                                                         | 1 | 1331.8 | 77.3 | 1 | K.DMTSEQLDDILK.Y                    |
| gij 42544159 r | 6                    | 18     | 9.80%  | 858     | 96865    | 5.4 heat shock 105kd [Homo sapiens]                                                                            |   |        |      |   |                                     |
| *              | HsFLAG-TCF3_Ti_1     | 5.3452 | 0.4229 | 1716.55 | 1716.851 | 8806.7                                                                                                         | 1 | 2406.1 | 82.1 | 9 | K.NQQITHANNTVSNFK.R                 |
| *              | HsFLAG-ARP6_Ti_1     | 2.6511 | 0.2296 | 1322.17 | 1322.547 | 7070.1                                                                                                         | 1 | 822.1  | 66.7 | 1 | K.VLGTAFDPFLGGK.N                   |
|                | HsFLAG-ARP6_Ti_1     | 5.0602 | 0.396  | 1537.59 | 1536.744 | 7693                                                                                                           | 1 | 1948.6 | 80.8 | 4 | R.GCALQCAILSPAFK.V                  |
|                | HsFlag-FLJ90652_2    | 2.0861 | 0.2198 | 871.37  | 871.971  | 2993.4                                                                                                         | 2 | 294.8  | 78.6 | 1 | R.NHAAPFSK.V                        |
| *              | HsFLAG-ARP6_Ti_1     | 3.2619 | 0.2894 | 2021.28 | 2022.395 | 4828.5                                                                                                         | 1 | 601.2  | 52.9 | 1 | K.VVNVLEPIEANLVWQLGK.D              |
| *              | HsFLAG-ARP6_Ti_1     | 3.9855 | 0.3175 | 1854.09 | 1855.064 | 6518.9                                                                                                         | 1 | 924.3  | 63.3 | 2 | K.ELNNTCEPVVTQPKPK.I                |
| gij 17388799 r | 2                    | 3      | 9.80%  | 326     | 36087    | 9.1 DnaJ (Hsp40) homolog, subfamily B, member 6 isoform a [Homo sapiens]                                       |   |        |      |   |                                     |
| gij 4885495 re | 2                    | 3      | 13.30% | 241     | 26900    | 7.6 DnaJ (Hsp40) homolog, subfamily B, member 6 isoform b [Homo sapiens]                                       |   |        |      |   |                                     |
|                | HsFlag-les6_293_Ti_1 | 3.1919 | 0.3696 | 1423.4  | 1423.563 | 3866.6                                                                                                         | 1 | 506.9  | 70.8 | 1 | K.QVAEAYEVLSDAK.K                   |
|                | HsFLAG-TCF3_Ti_1     | 5.2819 | 0.4197 | 2376.47 | 2376.499 | 6500.8                                                                                                         | 1 | 1470.6 | 63.9 | 2 | R.DPFSDFDFEDPFEDFFGNR.R             |
| gij 68160937 r | 4                    | 7      | 9.70%  | 630     | 70974    | 8.1 tripartite motif-containing 25 [Homo sapiens]                                                              |   |        |      |   |                                     |
| *              | HsFlag-VPS71_Ti_1    | 4.0825 | 0.3746 | 2091.1  | 2091.338 | 8765.3                                                                                                         | 1 | 753.5  | 52.9 | 2 | K.NTVLCNVVEQFLQADLAR.E              |
| *              | HsSrcap_Ti_203.474   | 5.3965 | 0.474  | 3407.41 | 3408.805 | 8387.2                                                                                                         | 1 | 1728.7 | 32.8 | 3 | K.NTVLCNVVEQFLQADLAREPPADVWTPPAR.A  |
| *              | HsSrcap_Ti_203.147   | 3.169  | 0.3677 | 1827.46 | 1826.936 | 6971.9                                                                                                         | 1 | 794.9  | 59.4 | 1 | R.ASAPSPNAQVACDHCLK.E               |
| *              | HsFlag-VPS71_Ti_1    | 2.7266 | 0.152  | 1528.65 | 1528.789 | 5532.7                                                                                                         | 1 | 892.4  | 65.4 | 1 | K.LPTFGAPEQLVDLK.Q                  |
| gij 64368880 r | 2                    | 2      | 9.70%  | 544     | 61475    | 7.7 zinc finger protein 498 [Homo sapiens]                                                                     |   |        |      |   |                                     |
| *              | HsFlag-NUFIP_Ti_1    | 4.4344 | 0.3631 | 2274.11 | 2274.628 | 7121.2                                                                                                         | 1 | 815.9  | 47.6 | 1 | R.AFQEQALPVLQAGPGLPAVNPR.D          |
| *              | HsFlag-NUFIP_Ti_1    | 4.0361 | 0.2761 | 3101.96 | 3103.425 | 4874                                                                                                           | 1 | 604.4  | 27.5 | 1 | R.VCEQEPGGPAGSAPGLPPPQHGAIPLPDEVK.T |
| gij 21361282 r | 5                    | 11     | 9.70%  | 494     | 56678    | 11.5 splicing factor, arginine/serine-rich 4 [Homo sapiens]                                                    |   |        |      |   |                                     |
| *              | HsFLAG-ARP6_Ti_1     | 3.5009 | 0.1095 | 1434.48 | 1432.532 | 6839.9                                                                                                         | 1 | 1239.3 | 77.3 | 6 | K.NGYGFVEFDDL.R                     |
|                | HsFLAG-ARP6_Ti_1     | 3.1669 | 0.2486 | 1309.13 | 1310.36  | 6762.5                                                                                                         | 1 | 593.7  | 59.1 | 1 | R.DADDAVYELNGK.D                    |
|                | HsFLAG-ARP6_Ti_1     | 4.2565 | 0.1753 | 1309.27 | 1310.36  | 4682.8                                                                                                         | 1 | 1253   | 86.4 | 2 | R.DADDAVYELNGK.D                    |
| *              | HsFlag-NUFIP_Ti_1    | 2.6215 | 0.1725 | 1618.24 | 1618.799 | 6266.2                                                                                                         | 1 | 483.9  | 61.5 | 1 | K.NEGVIEFVSYSMDK.R                  |
| *              | HsFlag-NUFIP_Ti_1    | 2.5587 | 0.1543 | 1114.89 | 1115.231 | 3435.1                                                                                                         | 3 | 434.5  | 72.2 | 1 | K.SKPNLPSESR.S                      |
| gij 4502801 re | 2                    | 2      | 9.70%  | 421     | 44969    | 7.5 regulator of chromosome condensation 1 [Homo sapiens]                                                      |   |        |      |   |                                     |
| *              | HsFLAG-p53-DNA-D     | 4.9627 | 0.4409 | 2864.58 | 2866.312 | 6216.9                                                                                                         | 1 | 1263.2 | 35.6 | 1 | R.KKPALVSIPEDVVQAEAGMHTVCLSK.S      |
| *              | HsFLAG-p53-DNA-D     | 2.6681 | 0.1266 | 1528.58 | 1528.807 | 8069.3                                                                                                         | 1 | 639    | 50   | 1 | R.DNNGVIGLLEPMKK.S                  |
| gij 21361454 r | 2                    | 2      | 9.70%  | 320     | 33637    | 7.8 pyrroline-5-carboxylate reductase family, member 2 [Homo sapiens]                                          |   |        |      |   |                                     |
| *              | HsFLAG-ARP6_Ti_1     | 2.5805 | 0.1697 | 1599.28 | 1599.808 | 3906                                                                                                           | 1 | 386.4  | 66.7 | 1 | K.MLLDSEQHPCQLK.D                   |
| *              | HsFLAG-p53-DNA-D     | 5.1471 | 0.4595 | 1828.64 | 1829.101 | 6911.4                                                                                                         | 1 | 1354.3 | 64.7 | 1 | R.VKLESPTVSTLTPSSPGK.L              |
| gij 27482992 r | 2                    | 13     | 9.70%  | 155     | 17219    | 11.1 PREDICTED: similar to 60S ribosomal protein L29 (Cell surface heparin binding protein HIP) [Homo sapiens] |   |        |      |   |                                     |
| gij 89042710 r | 2                    | 13     | 9.70%  | 155     | 17219    | 11.1 PREDICTED: similar to 60S ribosomal protein L29 (Cell surface heparin binding protein HIP) [Homo sapiens] |   |        |      |   |                                     |

|                           |        |        |         |          |         |                                                                                                                          |
|---------------------------|--------|--------|---------|----------|---------|--------------------------------------------------------------------------------------------------------------------------|
| gi 88999346 r             | 2      | 13     | 9.60%   | 157      | 17368   | 11.2 PREDICTED: similar to 60S ribosomal protein L29 (Cell surface heparin binding protein HIP) [Homo sapiens]           |
| gi 88997659 r             | 2      | 13     | 9.60%   | 157      | 17368   | 11.2 PREDICTED: similar to 60S ribosomal protein L29 (Cell surface heparin binding protein HIP) isoform 2 [Homo sapiens] |
| gi 88997656 r             | 2      | 13     | 9.60%   | 157      | 17368   | 11.2 PREDICTED: similar to 60S ribosomal protein L29 (Cell surface heparin binding protein HIP) isoform 1 [Homo sapiens] |
| gi 88987619 r             | 2      | 13     | 9.70%   | 155      | 17138   | 10.8 PREDICTED: similar to 60S ribosomal protein L29 (Cell surface heparin binding protein HIP) [Homo sapiens]           |
| gi 88982429 r             | 2      | 13     | 9.70%   | 155      | 17138   | 10.8 PREDICTED: similar to 60S ribosomal protein L29 (Cell surface heparin binding protein HIP) [Homo sapiens]           |
| gi 4506629 re             | 2      | 13     | 9.40%   | 159      | 17752   | 11.7 ribosomal protein L29 [Homo sapiens]                                                                                |
| HsTIP60_Ti_103.129        | 2.6712 | 0.3983 | 1377.55 | 1378.571 | 6754.6  | 2 619.2 53.6 6 K.AQAAAPASVPAQAPK.G                                                                                       |
| HsFLAG-ARP6_Ti_103.129    | 4.3209 | 0.3117 | 1378.57 | 1378.571 | 3297.4  | 1 658.3 71.4 7 K.AQAAAPASVPAQAPK.G                                                                                       |
| gi 56676371 r             | 8      | 12     | 9.60%   | 1443     | 160883  | 6.4 cleavage and polyadenylation specific factor 1, 160kDa [Homo sapiens]                                                |
| * HsFLAG-FLJ20729_1       | 3.6792 | 0.3061 | 1634.96 | 1634.829 | 6414.2  | 1 669.8 62.5 1 K.TLSLHYFEEPELR.D                                                                                         |
| * HsARP6-FLAG_Ti_103.129  | 3.2621 | 0.1384 | 1397.51 | 1397.614 | 3631.1  | 1 827.4 81.8 1 R.SSFLPSYIIDVR.A                                                                                          |
| * HsARP6-FLAG_Ti_103.129  | 3.005  | 0.2008 | 1245.32 | 1245.508 | 5976.4  | 2 1034.2 80 1 R.YIVQVSPLGIR.L                                                                                            |
| * HsFLAG-Lin9_Ti_203.129  | 4.4388 | 0.363  | 1792.8  | 1792.943 | 4647.6  | 1 916 68.8 2 R.VLVDSSFGQPTTQGEAR.R                                                                                       |
| * HsFLAG-ARP6_Ti_203.129  | 3.5117 | 0.3533 | 1948.53 | 1948.272 | 6418.2  | 1 806.6 56.2 4 R.ISVLPAYLSYDAPWPVR.K                                                                                     |
| * HsFLAG-Lin9_Ti_203.129  | 3.9246 | 0.1998 | 2997.45 | 2996.395 | 4444.4  | 2 480.1 30 1 R.YIHPQQEAFSISQLISPVSWEAIPNAR.I                                                                             |
| * HsFLAG-ARP6_Ti_103.129  | 2.7756 | 0.252  | 2093.49 | 2092.542 | 8514.4  | 2 538.3 41.7 1 R.ILIMDVIEVVPEPGQPLTK.N                                                                                   |
| * HsFlag-VPS71_Ti_103.129 | 3.6771 | 0.2226 | 2585.09 | 2584.929 | 7682.4  | 1 794.6 30.7 1 K.KIGTTPDIILDDLLETDRVTAHF.-                                                                               |
| gi 46852388 r             | 8      | 53     | 9.60%   | 1150     | 132821  | 5.8 cell-cycle and apoptosis regulatory protein 1 [Homo sapiens]                                                         |
| * HsFlag-VPS71_Ti_103.129 | 4.1032 | 0.3473 | 1951.71 | 1952.218 | 4494.7  | 1 590.6 62.5 10 R.IQTLPNQNSQTQPLLK.T                                                                                     |
| * HsFLAG-FLJ20729_1       | 3.5187 | 0.3611 | 1761.07 | 1761.935 | 3878.9  | 1 615.8 69.2 2 K.FSLDCPSCDMMELR.R                                                                                        |
| * HsFlag-DPCD_Ti_203.129  | 3.0911 | 0.1323 | 1196.95 | 1197.296 | 9439.5  | 4 984.1 75 3 R.YHRPEETHK.G                                                                                               |
| * HsFLAG-p53-DNA-D        | 4.7566 | 0.4026 | 2722.53 | 2722.128 | 7441.5  | 1 1612.9 39.8 5 R.TVPAHVETVVLFFPDVWHCLPTR.S                                                                              |
| * HsFLAG-FLJ20729_1       | 3.7656 | 0.3791 | 2049.19 | 2048.392 | 7012.1  | 1 949.8 55.9 5 R.YILPDEPAIIVHPNWAAK.S                                                                                    |
| * HsFLAG-Lin9_Ti_203.129  | 4.877  | 0.4001 | 1772.81 | 1773.039 | 6594.2  | 1 1226.9 71.4 20 K.DLEEILYTLGLHLSR.A                                                                                     |
| * HsARP6-FLAG_Ti_103.129  | 4.037  | 0.2956 | 1773.35 | 1773.039 | 5097.6  | 1 964.8 48.2 3 K.DLEEILYTLGLHLSR.A                                                                                       |
| * HsFLAG-p53-DNA-D        | 3.9885 | 0.3909 | 1601.22 | 1600.871 | 6480    | 1 1126.5 73.1 5 R.NLSTVMDEIHTVLK.K                                                                                       |
| gi 4501891 re             | 7      | 31     | 9.60%   | 892      | 103058  | 5.4 actinin, alpha 1 [Homo sapiens]                                                                                      |
| HsFLAG-ARP6_Ti_103.129    | 3.2973 | 0.3143 | 1392.39 | 1393.511 | 7905.9  | 1 1434.5 85 3 K.TFTAWCNSHLR.K                                                                                            |
| HsFLAG-FLJ20729_1         | 3.9341 | 0.4516 | 2007.79 | 2009.287 | 7496.6  | 1 1006 55.9 4 K.AIMTYVSSFYHAFSGAQK.A                                                                                     |
| HsFLAG-p53-DNA-D          | 3.8305 | 0.2522 | 1216.95 | 1216.423 | 7573.3  | 1 1642.6 94.4 1 K.LASDLLEWIR.R                                                                                           |
| HsFLAG-p53-DNA-D          | 4.1643 | 0.2635 | 1422.27 | 1422.58  | 8347.1  | 1 1715 85 2 K.GYEEWLLNEIR.R                                                                                              |
| * HsFLAG-p53-DNA-D        | 3.9626 | 0.1707 | 1294.34 | 1294.537 | 7619    | 1 1365.7 81.8 2 R.LAILGIHNEVSK.I                                                                                         |
| HsFLAG-Lin9_Ti_203.129    | 4.3758 | 0.2651 | 1387.59 | 1387.622 | 9291.5  | 1 1782.9 81.8 18 R.VGWEQLLTTIAR.T                                                                                        |
| HsFLAG-p53-DNA-D          | 3.8681 | 0.3006 | 1430.49 | 1430.601 | 7341.8  | 1 1291 81.8 1 R.TINEVENQILTR.D                                                                                           |
| gi 66529294 r             | 2      | 3      | 9.60%   | 354      | 39381   | 5.6 paraoxonase 2 isoform 1 [Homo sapiens]                                                                               |
| gi 66529396 r             | 2      | 3      | 9.90%   | 342      | 37980   | 5.7 paraoxonase 2 isoform 2 [Homo sapiens]                                                                               |
| HsFLAG-ARP6_Ti_103.129    | 3.3791 | 0.2082 | 1679.53 | 1679.1   | 7917.3  | 1 998.9 56.2 2 R.LVAVGLLGIALALLGER.L                                                                                     |
| HsFLAG-ARP6_Ti_103.129    | 3.1477 | 0.3032 | 2028.65 | 2027.371 | 10147.2 | 1 611.6 46.9 1 K.YIYVADILAHEIHVLEK.H                                                                                     |
| gi 7705855 re             | 2      | 4      | 9.60%   | 312      | 34324   | 9.3 steroid dehydrogenase homolog [Homo sapiens]                                                                         |
| * HsFLAG-ARP6_Ti_103.129  | 4.6609 | 0.3912 | 1978.44 | 1979.122 | 9440.2  | 1 1821.7 71.4 2 K.TFVDFFSQCLHEEYR.S                                                                                      |
| * HsFLAG-ARP6_Ti_103.129  | 3.1589 | 0.2186 | 1657.35 | 1655.977 | 5037.4  | 4 364.7 50 2 K.GVQVQSVLPYFVATK.L                                                                                         |
| gi 4502899 re             | 1      | 2      | 9.60%   | 218      | 23662   | 4.5 clathrin, light polypeptide A isoform a [Homo sapiens]                                                               |
| HsFlag-VPS71_Ti_103.129   | 2.8336 | 0.288  | 2352.84 | 2353.417 | 8337.6  | 1 1199.8 55 2 R.AAEEAFVNDIDESSPGTEWER.V                                                                                  |

|                      |        |        |         |          |         |                                                                                                                         |        |      |    |                              |
|----------------------|--------|--------|---------|----------|---------|-------------------------------------------------------------------------------------------------------------------------|--------|------|----|------------------------------|
| gi 52486999 r        | 9      | 22     | 9.50%   | 1478     | 169581  | 8.7 THO complex 2 [Homo sapiens]                                                                                        |        |      |    |                              |
| * HsFlag-VPS71_Ti_10 | 3.5939 | 0.1983 | 1415.78 | 1415.589 | 7328.9  | 8                                                                                                                       | 935.8  | 68.2 | 2  | K.NETYN SHPLLVK.V            |
| * HsFlag-VPS71_Ti_10 | 2.5686 | 0.3874 | 2218.68 | 2218.558 | 7421.6  | 2                                                                                                                       | 359.1  | 38.9 | 1  | K.LSHSNPTILFDYILSQIQK.Y      |
| * HsARP6-FLAG_Ti_10  | 3.0774 | 0.1425 | 1479.15 | 1477.698 | 5222.9  | 2                                                                                                                       | 689.6  | 66.7 | 2  | K.YDNLITPVVDSLK.Y            |
| * HsFLAG-Lin9_Ti_20  | 3.8189 | 0.3289 | 2676.55 | 2675.017 | 7929.3  | 1                                                                                                                       | 492.7  | 34.1 | 1  | K.YLTSLNYDVLAYCIIEALANPEK.E  |
| * HsARP6-FLAG_Ti_10  | 4.0183 | 0.115  | 1920.19 | 1920.259 | 6282    | 2                                                                                                                       | 1253.2 | 43.8 | 1  | K.YPIDLAGLLQYVANQLK.A        |
| * HsFlag-VPS71_Ti_10 | 5.0282 | 0.4424 | 1920.69 | 1920.259 | 5892.8  | 1                                                                                                                       | 1878.1 | 75   | 6  | K.YPIDLAGLLQYVANQLK.A        |
| * HsFlag-VPS71_Ti_10 | 4.0969 | 0.1564 | 2308.57 | 2307.68  | 6952.3  | 1                                                                                                                       | 1175.6 | 39.5 | 2  | K.DALLDHDLALPLCLLMAQQR.N     |
| * HsARP6-FLAG_Ti_10  | 2.8365 | 0.3401 | 1540.42 | 1540.725 | 4177.9  | 1                                                                                                                       | 362.3  | 58.3 | 2  | K.ECGNYPGFLTILR.A            |
| * HsFLAG-Lin9_Ti_20  | 5.797  | 0.5295 | 2116.72 | 2117.237 | 8777.3  | 1                                                                                                                       | 1486.1 | 54.3 | 5  | R.NAVASVQNGPGGGPSSSSIGSASK.S |
| gi 4505117 re        | 1      | 4      | 9.50%   | 411      | 43255   | 10 methyl-CpG binding domain protein 2 isoform 1 [Homo sapiens]                                                         |        |      |    |                              |
| * HsFlag-VPS71_Ti_10 | 5.1282 | 0.2605 | 3723.77 | 3722.101 | 4456.2  | 1                                                                                                                       | 454.1  | 21.7 | 4  | N                            |
| gi 41327764 r        | 2      | 4      | 9.50%   | 359      | 39589   | 7.2 aldo-keto reductase family 7, member A2 [Homo sapiens]                                                              |        |      |    |                              |
| * HsARP6-FLAG_Ti_10  | 4.2871 | 0.4645 | 1584.92 | 1585.843 | 6244.7  | 1                                                                                                                       | 1133.8 | 71.4 | 2  | R.FYAYNPLAGGLLTGK.Y          |
| * HsFLAG-ARP6_Ti_20  | 3.7573 | 0.3816 | 1805.68 | 1806.029 | 5877.3  | 1                                                                                                                       | 1144.4 | 63.9 | 2  | K.ALQAAYGASAPSVTSAALR.W      |
| gi 11034845 r        | 2      | 3      | 9.50%   | 326      | 36900   | 6 hypothetical protein LOC58490 [Homo sapiens]                                                                          |        |      |    |                              |
| * HsFLAG-p53-DNA-D   | 3.7147 | 0.4418 | 1706.66 | 1706.896 | 7148.8  | 1                                                                                                                       | 846.2  | 60.7 | 1  | R.EFESVLVDAF SHVAR.E         |
| * HsARP6-FLAG_Ti_10  | 2.6028 | 0.2704 | 1769.88 | 1770.033 | 4557.6  | 3                                                                                                                       | 255.9  | 43.3 | 2  | K.IASLPQEVQDVSLLEK.I         |
| gi 21237802 r        | 8      | 42     | 9.40%   | 1105     | 122721  | 5.8 SWI/SNF-related matrix-associated actin-dependent regulator of chromatin c1 [Homo sapiens]                          |        |      |    |                              |
| * HsFLAG-Lin9_Ti_20  | 6.2645 | 0.45   | 2078.89 | 2078.416 | 11722.4 | 1                                                                                                                       | 2719.6 | 66.7 | 25 | K.TLAGLVVQLLQFQEDAFGK.H      |
| * HsFLAG-Lin9_Ti_20  | 4.4275 | 0.3229 | 1401.68 | 1402.602 | 10566.5 | 1                                                                                                                       | 1623.2 | 69.2 | 1  | K.AGGALCHILGAAYK.Y           |
| * HsSrcap_Ti_204.322 | 3.9364 | 0.287  | 2613.96 | 2615.011 | 4563.5  | 3                                                                                                                       | 368.9  | 40.5 | 2  | K.TLVQNNCLTRPNYIPLIDILK.L    |
| * HsSrcap_Ti_204.321 | 4.4564 | 0.1512 | 2615.29 | 2615.011 | 9122.4  | 1                                                                                                                       | 1750.3 | 38.1 | 2  | K.TLVQNNCLTRPNYIPLIDILK.L    |
| HsFlag-VPS71_Ti_10   | 3.4336 | 0.1859 | 2240.34 | 2240.573 | 8004.4  | 1                                                                                                                       | 732.2  | 50   | 1  | R.EWTEQETLLLLLEALEMYK.D      |
| HsFlag-VPS71_Ti_10   | 4.0724 | 0.2671 | 1432.39 | 1432.585 | 6575.7  | 1                                                                                                                       | 1169.4 | 80   | 6  | R.TQDECILHFLR.L              |
| HsFLAG-p53-DNA-D     | 2.1902 | 0.198  | 924.5   | 925.032  | 4939.2  | 1                                                                                                                       | 519.1  | 78.6 | 1  | K.HLAAVEER.K                 |
| HsARP6-FLAG_Ti_10    | 4.2653 | 0.3252 | 1332.08 | 1332.642 | 7108.5  | 1                                                                                                                       | 1762   | 86.4 | 4  | K.SLVALLVETQMK.K             |
| gi 5803092 re        | 3      | 3      | 9.40%   | 478      | 52892   | 5.8 methionyl aminopeptidase 2 [Homo sapiens]                                                                           |        |      |    |                              |
| * HsFLAG-FLJ20729_   | 3.4627 | 0.2809 | 1694.96 | 1694.798 | 7220    | 1                                                                                                                       | 783.1  | 57.7 | 1  | K.ALDQASEEIWNDFR.E           |
| * HsFLAG-FLJ20729_   | 2.8753 | 0.229  | 1520.62 | 1520.778 | 4606.8  | 4                                                                                                                       | 258.1  | 54.2 | 1  | K.NFDVGHVPIRLPR.T            |
| * HsFLAG-FLJ20729_   | 3.2438 | 0.3398 | 2102.48 | 2103.352 | 7834.8  | 5                                                                                                                       | 533.4  | 44.1 | 1  | K.NLCDLGIVDPYPLCDIK.G        |
| gi 29731731 r        | 2      | 21     | 9.40%   | 361      | 37974   | 5.6 PREDICTED: similar to eukaryotic translation initiation factor 3, subunit 5 epsilon, 47kDa isoform 1 [Homo sapiens] |        |      |    |                              |
| gi 88954796 r        | 2      | 21     | 10.10%  | 336      | 35417   | 5.4 PREDICTED: similar to eukaryotic translation initiation factor 3, subunit 5 epsilon, 47kDa isoform 6 [Homo sapiens] |        |      |    |                              |
| gi 88954792 r        | 2      | 21     | 9.40%   | 361      | 37974   | 5.6 PREDICTED: similar to eukaryotic translation initiation factor 3, subunit 5 epsilon, 47kDa isoform 5 [Homo sapiens] |        |      |    |                              |
| gi 88954789 r        | 2      | 21     | 9.40%   | 361      | 37974   | 5.6 PREDICTED: similar to eukaryotic translation initiation factor 3, subunit 5 epsilon, 47kDa isoform 4 [Homo sapiens] |        |      |    |                              |
| gi 88953071 r        | 2      | 21     | 10.10%  | 336      | 35417   | 5.4 PREDICTED: similar to eukaryotic translation initiation factor 3, subunit 5 epsilon, 47kDa isoform 3 [Homo sapiens] |        |      |    |                              |
| gi 88953069 r        | 2      | 21     | 9.40%   | 361      | 37974   | 5.6 PREDICTED: similar to eukaryotic translation initiation factor 3, subunit 5 epsilon, 47kDa isoform 2 [Homo sapiens] |        |      |    |                              |
| gi 4503519 re        | 2      | 21     | 9.50%   | 357      | 37564   | 5.4 eukaryotic translation initiation factor 3, subunit 5 epsilon, 47kDa [Homo sapiens]                                 |        |      |    |                              |
| HsARP6-FLAG_Ti_10    | 2.5973 | 0.2924 | 1712.15 | 1712.987 | 5713.7  | 1                                                                                                                       | 478    | 53.6 | 1  | R.LHPVILASIVDSYER.R          |
| HsFlag-FLJ90652_2    | 6.5528 | 0.548  | 2050.63 | 2051.301 | 6746.8  | 1                                                                                                                       | 1863.9 | 72.2 | 20 | R.IQDALSTVLQYAEDVLSGK.V      |
| gi 22538431 r        | 2      | 6      | 9.40%   | 339      | 37822   | 6.3 cathepsin B preproprotein [Homo sapiens]                                                                            |        |      |    |                              |
| gi 4503139 re        | 2      | 6      | 9.40%   | 339      | 37822   | 6.3 cathepsin B preproprotein [Homo sapiens]                                                                            |        |      |    |                              |
| gi 22538437 r        | 2      | 6      | 9.40%   | 339      | 37822   | 6.3 cathepsin B preproprotein [Homo sapiens]                                                                            |        |      |    |                              |

|               |                    |        |        |         |          |                                                                                                |   |        |      |                                      |
|---------------|--------------------|--------|--------|---------|----------|------------------------------------------------------------------------------------------------|---|--------|------|--------------------------------------|
| gi 22538435 r | 2                  | 6      | 9.40%  | 339     | 37822    | 6.3 cathepsin B preproprotein [Homo sapiens]                                                   |   |        |      |                                      |
| gi 22538433 r | 2                  | 6      | 9.40%  | 339     | 37822    | 6.3 cathepsin B preproprotein [Homo sapiens]                                                   |   |        |      |                                      |
|               | HsFLAG-FLJ20729_   | 3.9594 | 0.4684 | 1635.19 | 1635.687 | 6351                                                                                           | 1 | 1278.6 | 76.9 | 1 K.HYGYNSYSVSNSEK.D                 |
|               | HsFLAG-ARP6_Ti_1   | 3.9686 | 0.4258 | 2006.6  | 2007.25  | 8678.8                                                                                         | 1 | 652.4  | 47.1 | 5 K.NGPVEGAFSVYSDFLLYK.S             |
| gi 40254924 r | 2                  | 3      | 9.40%  | 307     | 34930    | 9.6 hypothetical protein LOC55379 [Homo sapiens]                                               |   |        |      |                                      |
| *             | HsFLAG-ARP6_Ti_1   | 3.1973 | 0.3741 | 1802.59 | 1803.075 | 3599.3                                                                                         | 1 | 399.5  | 60   | 1 K.LTTLPSDFCGLTHLVK.L               |
| *             | HsFLAG-ARP6_Ti_1   | 4.6517 | 0.2921 | 1535.06 | 1534.799 | 7496.2                                                                                         | 1 | 1469.3 | 79.2 | 2 R.LVNLQHLDLLNKK.L                  |
| gi 21071006 r | 2                  | 4      | 9.40%  | 329     | 34326    | 5.2 tumor suppressing subtransferable candidate 4 [Homo sapiens]                               |   |        |      |                                      |
| *             | HsFlag-ZnF-HIT2_Ti | 5.134  | 0.4471 | 1850.76 | 1850.016 | 8950.9                                                                                         | 1 | 1572.6 | 64.7 | 2 R.RAPSSVAHTSMDNGGFK.R              |
| *             | HsFlag-ZnF-HIT2_Ti | 3.0573 | 0.444  | 1476.34 | 1476.675 | 5447                                                                                           | 1 | 926.3  | 75   | 2 R.VPPVPDYVAHPER.W                  |
| gi 21071056 r | 10                 | 20     | 9.30%  | 1647    | 184644   | 7.9 SWI/SNF-related matrix-associated actin-dependent regulator of chromatin a4 [Homo sapiens] |   |        |      |                                      |
| *             | HsFLAG-p53-DNA-D   | 3.7451 | 0.3554 | 1726.24 | 1725.94  | 4662.7                                                                                         | 1 | 560.4  | 66.7 | 2 R.IQELENLPGSLAGDLR.T               |
| *             | HsFLAG-p53-DNA-D   | 2.5679 | 0.3115 | 1232.14 | 1233.326 | 6173.3                                                                                         | 6 | 499.3  | 70   | 1 K.AVATYHANTER.E                    |
| *             | HsFlag-VPS71_Ti_1  | 3.1129 | 0.256  | 2353.32 | 2353.678 | 10246.1                                                                                        | 1 | 861.1  | 44.7 | 1 R.LAYLLQQTDEYVANLTELVR.Q           |
| *             | HsFLAG-p53-DNA-D   | 2.3471 | 0.2332 | 868.48  | 869.009  | 6177.2                                                                                         | 3 | 652.7  | 71.4 | 1 K.VIHVESGK.I                       |
| *             | HsFLAG-p53-DNA-D   | 4.0778 | 0.4407 | 1665.59 | 1665.846 | 7635.9                                                                                         | 1 | 1948.7 | 75   | 1 R.GLQSYAVAVHAVTER.V                |
| *             | HsFlag-VPS71_Ti_1  | 3.9075 | 0.3789 | 2639.02 | 2639.066 | 3455                                                                                           | 1 | 278.2  | 38.6 | 2 R.INGPFLIIVPLSTLSNWAYEFDK.W        |
|               | HsARP6-FLAG_Ti_1   | 4.3946 | 0.2088 | 1618.2  | 1617.926 | 5797.2                                                                                         | 1 | 1207.8 | 79.2 | 3 K.FNVLLTTYEYIIK.D                  |
|               | HsARP6-FLAG_Ti_1   | 3.4162 | 0.2719 | 1512.2  | 1512.752 | 7683.9                                                                                         | 1 | 1469.3 | 70.8 | 6 K.LTQVLNTHYVAPR.R                  |
|               | HsFLAG-Lin9_Ti_20  | 3.0111 | 0.1977 | 2028.36 | 2029.516 | 8605                                                                                           | 1 | 667.2  | 46.9 | 1 K.LPELWALLNFFLPTIFK.S              |
| *             | HsARP6-FLAG_Ti_1   | 2.6924 | 0.3089 | 2020.7  | 2022.265 | 5407.2                                                                                         | 1 | 850.7  | 62.5 | 2 K.TFNEPGSEYFIFLLSTR.A              |
| gi 24432016 r | 2                  | 16     | 9.30%  | 471     | 52050    | 8 pre-mRNA cleavage factor I, 59 kDa subunit [Homo sapiens]                                    |   |        |      |                                      |
| *             | HsFLAG-ARP6_Ti_1   | 3.1893 | 0.3215 | 2036.3  | 2037.203 | 7355.8                                                                                         | 1 | 629.5  | 50   | 1 R.DSGPPPSTVSEAEFEDIMK.R            |
| *             | HsFlag-VPS71_Ti_1  | 6.1295 | 0.4065 | 2437.03 | 2437.75  | 8341.3                                                                                         | 1 | 2345.2 | 58.3 | 15 K.AVSGASAGDYSDAIETLLTAIAVIK.Q     |
| gi 37588859 r | 1                  | 2      | 9.30%  | 246     | 27965    | 6.6 ring finger protein 41 isoform 2 [Homo sapiens]                                            |   |        |      |                                      |
| gi 5032071 re | 1                  | 2      | 7.30%  | 317     | 35905    | 6.1 ring finger protein 41 isoform 1 [Homo sapiens]                                            |   |        |      |                                      |
| gi 37588861 r | 1                  | 2      | 7.30%  | 317     | 35905    | 6.1 ring finger protein 41 isoform 1 [Homo sapiens]                                            |   |        |      |                                      |
|               | HsFlag-NUFIP_Ti_1  | 4.4989 | 0.324  | 2581.82 | 2581.811 | 12323.2                                                                                        | 4 | 816.2  | 26.1 | 2 K.RSLVESGCPASIVNELIENAHES.S        |
| gi 6005757 re | 5                  | 8      | 9.20%  | 1047    | 119914   | 5.7 chromatin-specific transcription elongation factor large subunit [Homo sapiens]            |   |        |      |                                      |
| *             | HsFLAG-Lin9_Ti_20  | 3.006  | 0.1605 | 1624.97 | 1624.837 | 7659                                                                                           | 2 | 695.8  | 53.3 | 1 K.GNENANGAPAITLLIR.E               |
| *             | HsFLAG-FLJ20729_   | 5.4652 | 0.2806 | 3122.71 | 3123.545 | 10192                                                                                          | 1 | 2552.1 | 38   | 1 R.TLMVDPSQEVQENYNFLQLQEELK.E       |
| *             | HsFLAG-p53-DNA-D   | 4.3661 | 0.4032 | 2476.74 | 2478.011 | 5628.8                                                                                         | 1 | 685.5  | 47.6 | 1 K.KYETVIMPVFIATPFHIATIK.N          |
| *             | HsH2AZ-FLAG_293_   | 3.8226 | 0.1939 | 1677.33 | 1677.854 | 4125.1                                                                                         | 2 | 869.1  | 75   | 1 R.NEGNIFPNPEATFVK.E                |
| *             | HsFLAG-p53-DNA-D   | 4.0876 | 0.4469 | 1826.87 | 1827.05  | 3432.1                                                                                         | 1 | 539.2  | 65.6 | 4 K.APGEQTVPALNLQNAFR.I              |
| gi 56788366 r | 3                  | 4      | 9.20%  | 652     | 70755    | 7.9 phosphatidylinositol-binding clathrin assembly protein isoform 1 [Homo sapiens]            |   |        |      |                                      |
| gi 56788368 r | 3                  | 4      | 9.80%  | 610     | 66393    | 8.8 phosphatidylinositol-binding clathrin assembly protein isoform 2 [Homo sapiens]            |   |        |      |                                      |
|               | HsFlag-VPS71_Ti_1  | 3.7644 | 0.4575 | 1456.62 | 1457.627 | 5394.8                                                                                         | 1 | 689.3  | 64.3 | 2 R.ITAAQHSVTGSAVSK.T                |
|               | HsFLAG-p53-DNA-D   | 2.8167 | 0.3322 | 1923.26 | 1923.171 | 9742.2                                                                                         | 1 | 522.7  | 39.5 | 1 R.ATTLNAVSSLASTGLSLTK.V            |
|               | HsYL1_Ti_102.3404. | 4.9209 | 0.4354 | 2474.62 | 2474.728 | 5651.5                                                                                         | 1 | 801    | 47.9 | 1 K.LVSDDLSSLANLVGNLIGINGTTK.N       |
| gi 25777617 r | 3                  | 5      | 9.20%  | 598     | 66482    | 9.5 chromodomain protein, Y chromosome-like isoform a [Homo sapiens]                           |   |        |      |                                      |
| gi 25777619 r | 3                  | 5      | 10.10% | 544     | 60609    | 9.2 chromodomain protein, Y chromosome-like isoform b [Homo sapiens]                           |   |        |      |                                      |
|               | HsH2AZ-FLAG_293_   | 2.744  | 0.2484 | 1197.93 | 1197.377 | 8264.2                                                                                         | 9 | 689.7  | 65   | 1 K.ALVIGKDHESK.N                    |
|               | HsH2AZ-FLAG_293_   | 3.6737 | 0.1345 | 3117.44 | 3116.681 | 5871.4                                                                                         | 1 | 695.7  | 25.9 | 1 K.KPIIVAVNGPAIGLGASILPLCDVVWANEK.A |



|             |                    |        |        |         |          |         |   |        |      |   |                                                                                             |
|-------------|--------------------|--------|--------|---------|----------|---------|---|--------|------|---|---------------------------------------------------------------------------------------------|
|             | HsH2AZ-FLAG_293_   | 4.5113 | 0.4108 | 1575.21 | 1575.722 | 7224.6  | 1 | 1512.3 | 76.9 | 3 | K.ELASCNPVVLEESK.A                                                                          |
| gi 20149629 | r                  | 3      | 8      | 9.20%   | 455      | 50647   |   |        |      |   | 9.1 DEAD (Asp-Glu-Ala-Asp) box polypeptide 47 isoform 1 [Homo sapiens]                      |
| gi 41327776 | r                  | 3      | 8      | 10.30%  | 406      | 45169   |   |        |      |   | 9.2 DEAD (Asp-Glu-Ala-Asp) box polypeptide 47 isoform 2 [Homo sapiens]                      |
|             | HsARP6-FLAG_Ti_1   | 3.8813 | 0.284  | 1423.25 | 1422.711 | 4408.8  | 1 | 1047.9 | 83.3 | 2 | K.IQIEAIPLALQGR.D                                                                           |
|             | HsFLAG-p53-DNA-D   | 3.735  | 0.3775 | 1926.14 | 1926.266 | 6176.7  | 1 | 935.9  | 58.8 | 4 | K.TGAFALPILNALLETPQR.L                                                                      |
|             | HsFLAG-Lin9_Ti_20  | 2.9088 | 0.2468 | 1203.48 | 1203.473 | 7177    | 1 | 941.3  | 75   | 2 | K.KPHIIIATPGR.L                                                                             |
| gi 38016127 | r                  | 2      | 6      | 9.20%   | 425      | 48063   |   |        |      |   | 10.1 RNA binding motif protein 34 [Homo sapiens]                                            |
| *           | HsFLAG-ARP6_Ti_1   | 4.5517 | 0.4101 | 2312.6  | 2313.742 | 4771.9  | 1 | 559.2  | 47.5 | 5 | R.LASLFSSLEPQIQPVVYVPVK.Q                                                                   |
| *           | HsFLAG-TCF3_Ti_1   | 3.6386 | 0.1445 | 2011.18 | 2010.295 | 5490    | 1 | 405.2  | 47.1 | 1 | R.SVFGNLPYKVEESAIEK.H                                                                       |
| gi 5032173  | re                 | 1      | 2      | 9.20%   | 423      | 46156   |   |        |      |   | 8.3 nuclear receptor subfamily 2, group F, member 1 [Homo sapiens]                          |
| *           | HsScrap_Ti_204.150 | 4.9655 | 0.4305 | 3481.4  | 3482.621 | 8665    | 1 | 1044.4 | 24.3 | 2 | DK.G                                                                                        |
| gi 5453706  | re                 | 2      | 3      | 9.20%   | 346      | 38926   |   |        |      |   | 7.9 SPFH domain family, member 1 [Homo sapiens]                                             |
| *           | HsFLAG-ARP6_Ti_1   | 2.6309 | 0.1325 | 1490.04 | 1491.687 | 5759.7  | 2 | 404.5  | 58.3 | 1 | K.RISEIEDAAFLAR.E                                                                           |
| *           | HsFLAG-ARP6_Ti_1   | 3.3604 | 0.2934 | 2163.87 | 2164.447 | 3449    | 1 | 351.1  | 47.2 | 2 | K.IYFGSNIPNMFVDSSCALK.Y                                                                     |
| gi 22538467 | r                  | 1      | 2      | 9.10%   | 264      | 29204   |   |        |      |   | 6 proteasome beta 4 subunit [Homo sapiens]                                                  |
| *           | HsFlag-VPS71_Ti_1  | 4.1615 | 0.362  | 2632.76 | 2633.889 | 7723.3  | 1 | 614.5  | 39.1 | 2 | K.GVEIEGPLSTETNWDIAHMISGFE.-                                                                |
| gi 21359860 | r                  | 1      | 2      | 9.10%   | 110      | 12016   |   |        |      |   | 3.8 prothymosin, alpha (gene sequence 28) [Homo sapiens]                                    |
| gi 89036005 | r                  | 1      | 2      | 8.50%   | 118      | 12983   |   |        |      |   | 3.9 PREDICTED: similar to prothymosin, alpha (gene sequence 28) isoform 2 [Homo sapiens]    |
| gi 89036003 | r                  | 1      | 2      | 8.50%   | 118      | 12983   |   |        |      |   | 3.9 PREDICTED: similar to prothymosin, alpha (gene sequence 28) isoform 1 [Homo sapiens]    |
| gi 89035371 | r                  | 1      | 2      | 8.50%   | 118      | 12983   |   |        |      |   | 3.9 PREDICTED: similar to prothymosin, alpha (gene sequence 28) isoform 2 [Homo sapiens]    |
| gi 89035369 | r                  | 1      | 2      | 8.50%   | 118      | 12983   |   |        |      |   | 3.9 PREDICTED: similar to prothymosin, alpha (gene sequence 28) isoform 1 [Homo sapiens]    |
|             | HsH2AZ-FLAG_293_   | 2.9302 | 0.1716 | 1132.46 | 1132.172 | 8126.7  | 3 | 999.3  | 77.8 | 2 | K.EVVEEAENGR.D                                                                              |
| gi 41872631 | r                  | 14     | 28     | 9.00%   | 2511     | 273424  |   |        |      |   | 6.4 fatty acid synthase [Homo sapiens]                                                      |
| *           | HsFLAG-ARP6_Ti_1   | 3.4681 | 0.3131 | 1253.21 | 1252.415 | 7053.2  | 1 | 1338.5 | 85   | 2 | R.FDASFFGVHPK.Q                                                                             |
| *           | HsFLAG-TCF3_Ti_1   | 3.3093 | 0.2698 | 2542.59 | 2543.749 | 5481    | 1 | 348.7  | 34.8 | 1 | R.SLYQSAGVAPESFEYIEAHGTGTK.V                                                                |
| *           | HsFLAG-ARP6_Ti_1   | 3.5849 | 0.2785 | 1651.32 | 1651.878 | 3618.4  | 1 | 610.7  | 62.5 | 2 | K.SNMGHPEPASGLAALAK.V                                                                       |
| *           | HsFLAG-TCF3_Ti_1   | 3.2581 | 0.3054 | 1970.5  | 1970.195 | 3362.3  | 3 | 217.4  | 46.9 | 2 | R.WLSTSIPEAQWHSSLAR.T                                                                       |
| *           | HsFlag-FLJ90652_2  | 4.4308 | 0.1392 | 2786.43 | 2787.315 | 5736.7  | 1 | 942.4  | 32   | 3 | R.ALGLGVEQLPVVFEDVVLHQATILPK.T                                                              |
| *           | HsFLAG-ARP6_Ti_1   | 5.6817 | 0.4503 | 2841.36 | 2842.177 | 5648.5  | 1 | 1124.5 | 36.5 | 2 | R.LFDHPESPTPNPTEPLFLAQAEVYK.E                                                               |
| *           | HsFLAG-ARP6_Ti_1   | 2.6811 | 0.2088 | 957.46  | 957.12   | 5833.6  | 1 | 990.9  | 85.7 | 1 | K.HGLYLPTR.V                                                                                |
| *           | HsFlag-FLJ90652_2  | 2.9416 | 0.1345 | 1495.91 | 1496.707 | 5287.3  | 1 | 779.8  | 72.7 | 1 | R.RQQEQQVPILEK.F                                                                            |
| *           | HsFLAG-ARP6_Ti_1   | 3.9563 | 0.4875 | 1870.26 | 1870.945 | 5812.8  | 1 | 828.7  | 71.4 | 2 | K.FCFTPHTEEGCLSER.A                                                                         |
| *           | HsFLAG-FLJ20729_   | 4.8714 | 0.4227 | 1778.64 | 1779.084 | 5991.7  | 1 | 1583   | 75   | 5 | K.LPEDPLLSGLLDSPALK.A                                                                       |
| *           | HsFLAG-ARP6_Ti_1   | 3.3129 | 0.2234 | 1470.33 | 1470.582 | 8664.1  | 1 | 1404.3 | 75   | 1 | R.FPQLDSTSFANSR.D                                                                           |
| *           | HsFLAG-ARP6_Ti_1   | 4.266  | 0.3293 | 2150.49 | 2150.405 | 8886.9  | 1 | 2046.3 | 43.1 | 1 | R.AAPLDSIHSLAAYYIDCIR.Q                                                                     |
| *           | HsFLAG-TCF3_Ti_1   | 3.8475 | 0.3967 | 2423.05 | 2423.769 | 10841.7 | 1 | 1029   | 45.5 | 3 | R.TLLEGSGLESIIIIHSSSLAEPR.V                                                                 |
| *           | HsFLAG-TCF3_Ti_1   | 3.8126 | 0.3199 | 2423.86 | 2423.769 | 4986.3  | 1 | 655.9  | 34.1 | 2 | R.TLLEGSGLESIIIIHSSSLAEPR.V                                                                 |
| gi 4503509  | re                 | 10     | 19     | 8.80%   | 1382     | 166569  |   |        |      |   | 6.8 eukaryotic translation initiation factor 3, subunit 10 theta, 150/170kDa [Homo sapiens] |
| *           | HsARP6-FLAG_Ti_1   | 3.0425 | 0.3229 | 1523.44 | 1523.856 | 4698.8  | 2 | 597.5  | 65.4 | 2 | R.VLLATLSIPITPER.T                                                                          |
| *           | HsScrap_Ti_104.235 | 2.4232 | 0.214  | 1350.53 | 1351.632 | 4394.5  | 6 | 218    | 58.3 | 1 | R.LATLLGLQAPPTR.I                                                                           |
| *           | HsFlag-VPS71_Ti_1  | 3.4955 | 0.267  | 1351.77 | 1351.632 | 4927.6  | 1 | 763    | 70.8 | 3 | R.LATLLGLQAPPTR.I                                                                           |
| *           | HsARP6-FLAG_Ti_1   | 3.8531 | 0.2891 | 1435.95 | 1435.706 | 6321.1  | 1 | 1640.1 | 86.4 | 2 | R.FNVLQYVPEVK.D                                                                             |
| *           | HsScrap_Ti_202.484 | 4.2721 | 0.2761 | 1781.55 | 1781.018 | 9229.7  | 2 | 1483.7 | 65.4 | 3 | K.DLYNWLEVEFNPLK.L                                                                          |

|                    |                    |        |        |         |          |         |   |                                                                                                     |      |                                      |
|--------------------|--------------------|--------|--------|---------|----------|---------|---|-----------------------------------------------------------------------------------------------------|------|--------------------------------------|
| *                  | HsSrcap_Ti_205.351 | 3.2651 | 0.1619 | 1941.64 | 1940.206 | 6101.9  | 1 | 671.5                                                                                               | 56.7 | 1 R.LLQQVVSQIQSIEFSR.L               |
| *                  | HsFLAG-p53-DNA-D   | 2.6556 | 0.1136 | 1735.04 | 1736.021 | 3193.6  | 1 | 246.5                                                                                               | 53.6 | 1 R.LTSLVPFVDAFQLER.A                |
| *                  | HsScrap_Ti_102.223 | 2.1515 | 0.3081 | 1262.36 | 1263.495 | 6514.2  | 1 | 377.7                                                                                               | 59.1 | 1 R.NQLTAMSSVLAK.A                   |
| *                  | HsFlag-FLJ90652_29 | 2.7478 | 0.1543 | 936.09  | 936.099  | 7082.6  | 1 | 928.9                                                                                               | 92.9 | 1 K.PAHILQEK.E                       |
| *                  | HsFLAG-FLJ20729_1  | 4.5952 | 0.4358 | 2121.53 | 2122.349 | 5264.7  | 1 | 1149.1                                                                                              | 67.6 | 4 K.DIDIEDLEELDPDFIMAK.Q             |
| gi 22094121 refseq |                    | 7      | 11     | 8.80%   | 1297     | 146610  |   | 8.1 SCC-112 protein [Homo sapiens]                                                                  |      |                                      |
| *                  | HsARP6-FLAG_Ti_10  | 3.7915 | 0.3843 | 1574.28 | 1573.833 | 10024.3 | 1 | 1289.3                                                                                              | 65.4 | 2 R.DLALVNDQLLGFVR.E                 |
| *                  | HsFLAG-p53-DNA-D   | 2.944  | 0.2251 | 1663.32 | 1663.955 | 6116.7  | 1 | 893.1                                                                                               | 60   | 2 R.IAPVHIDSEAISALVK.L               |
| *                  | HsFLAG-FLJ20729_1  | 3.3353 | 0.1738 | 1699.59 | 1699.898 | 9817.1  | 1 | 805.7                                                                                               | 53.6 | 1 K.LWSPDEEVSPEVLAK.V                |
| *                  | HsFlag-VPS71_Ti_10 | 4.7749 | 0.4426 | 1608.81 | 1608.881 | 7231.1  | 1 | 1502.5                                                                                              | 68.8 | 2 K.PAGVLGAVNKPLSATGR.K              |
| *                  | HsSrcap_Ti_201.072 | 4.8462 | 0.3396 | 2164.57 | 2163.173 | 6432.5  | 1 | 936.6                                                                                               | 55.3 | 1 R.EQSSEAAETGVSENEENPVR.I           |
| *                  | HsFlag-VPS71_Ti_10 | 3.9542 | 0.2582 | 1488.84 | 1487.656 | 8292.5  | 1 | 1542.3                                                                                              | 76.9 | 1 K.RTVTAAGAENIQK.T                  |
| *                  | HsFlag-VPS71_Ti_10 | 5.0513 | 0.4523 | 1712.61 | 1712.86  | 8649.9  | 1 | 1563.8                                                                                              | 64.7 | 2 K.RAAVGQESPGGLEAGNAK.A             |
| gi 4503403 refseq  |                    | 5      | 7      | 8.80%   | 1117     | 122385  |   | 5.3 desmoglein 2 preproprotein [Homo sapiens]                                                       |      |                                      |
| *                  | HsFLAG-ARP6_Ti_10  | 3.3073 | 0.223  | 1850.56 | 1851.196 | 3949.4  | 1 | 633.2                                                                                               | 60   | 2 R.IVSLEPAYPPVYFLNK.D               |
| *                  | HsFLAG-ARP6_Ti_10  | 4.5867 | 0.3615 | 1582.37 | 1582.794 | 5452.3  | 1 | 1491.2                                                                                              | 84.6 | 1 R.ILDVNDNIPVVENK.V                 |
| *                  | HsFLAG-ARP6_Ti_10  | 2.7825 | 0.2005 | 1727.84 | 1728.001 | 3619.3  | 1 | 809.3                                                                                               | 68.8 | 1 K.VVPSFLPVDQGGSLVGR.N              |
| *                  | HsFLAG-ARP6_Ti_10  | 4.8031 | 0.3661 | 2579.67 | 2580.854 | 5791.9  | 1 | 1460.7                                                                                              | 58.7 | 1 R.VYAPASTLVDQPYANEGTVVTER.V        |
| *                  | HsFLAG-ARP6_Ti_10  | 5.0432 | 0.4644 | 2930.09 | 2930.311 | 7680.9  | 1 | 1123.2                                                                                              | 32.7 | 2 R.VIQPHGGGSPLEGTQHLQDVPYVMVR.E     |
| gi 5454172 refseq  |                    | 5      | 8      | 8.80%   | 633      | 69526   |   | 6.4 X-ray repair cross complementing protein 1 [Homo sapiens]                                       |      |                                      |
| *                  | HsFLAG-p53-DNA-D   | 3.201  | 0.2374 | 1662.57 | 1662.97  | 4399    | 1 | 550.7                                                                                               | 63.3 | 1 K.KTPSKPPAQLSPSPVK.R               |
| *                  | HsFLAG-FLJ20729_1  | 3.1742 | 0.2697 | 1534.39 | 1534.796 | 3863.6  | 2 | 380.4                                                                                               | 57.1 | 1 K.TPSKPPAQLSPSPVK.R                |
| *                  | HsFLAG-p53-DNA-D   | 2.1459 | 0.2116 | 980.57  | 981.14   | 2311.4  | 2 | 127.2                                                                                               | 66.7 | 2 R.TPATAPVPAR.A                     |
| *                  | HsARP6-FLAG_Ti_10  | 3.3741 | 0.2791 | 1875.39 | 1874.236 | 7387.3  | 1 | 1390.8                                                                                              | 62.5 | 2 K.ILQGVVVVLSGFQNPFR.S              |
| *                  | HsFLAG-p53-DNA-D   | 4.4866 | 0.2919 | 1614.63 | 1614.757 | 7308.6  | 1 | 1703.5                                                                                              | 79.2 | 2 K.HFFLYGEFPGDER.R                  |
| gi 89062143 refseq |                    | 2      | 5      | 8.80%   | 430      | 47445   |   | 6.1 PREDICTED: similar to Ig gamma-4 chain C region [Homo sapiens]                                  |      |                                      |
|                    | HsFLAG-p53-DNA-D   | 4.8632 | 0.1415 | 1808.66 | 1809.118 | 7769    | 1 | 1530.5                                                                                              | 70   | 3 R.VVSVLTVLHQDWLNGK.E               |
|                    | HsFLAG-p53-DNA-D   | 4.9004 | 0.3252 | 2544.62 | 2545.681 | 8013.6  | 1 | 1240.8                                                                                              | 50   | 2 K.GFYPSDIAVEWESNGQPENNYK.T         |
| gi 14269586 refseq |                    | 1      | 2      | 8.80%   | 205      | 24212   |   | 10.4 mitochondrial ribosomal protein S26 [Homo sapiens]                                             |      |                                      |
| *                  | HsFlag-NUFIP_Ti_10 | 3.8711 | 0.3967 | 2064.07 | 2063.437 | 4360.9  | 1 | 622.6                                                                                               | 61.8 | 2 R.VNMPPAVDPAEFFVLMER.Y             |
| gi 89052386 refseq |                    | 4      | 10     | 8.70%   | 835      | 89356   |   | 9.5 PREDICTED: widely-interspaced zinc finger motifs isoform 1 [Homo sapiens]                       |      |                                      |
| gi 89057269 refseq |                    | 4      | 10     | 8.70%   | 835      | 89356   |   | 9.5 PREDICTED: similar to widely-interspaced zinc finger motifs isoform 1 isoform 10 [Homo sapiens] |      |                                      |
|                    | HsSrcap_Ti_202.448 | 5.6218 | 0.4861 | 2318.91 | 2319.614 | 5862.4  | 1 | 1015.3                                                                                              | 57.1 | 4 R.QLGVAESESSESSGAPIDLLYLKQ         |
|                    | HsSrcap_Ti_205.239 | 4.5287 | 0.4722 | 1456.72 | 1456.728 | 6473.2  | 1 | 1445.8                                                                                              | 75   | 2 K.GLPDAHLGLPPLAK.K                 |
|                    | HsMRGBP-FLAG_Ti_10 | 3.3799 | 0.279  | 1151.61 | 1153.364 | 7785.7  | 1 | 1617.5                                                                                              | 81.8 | 1 K.TPLALAGSPTPK.N                   |
|                    | HsSrcap_Ti_203.236 | 3.2728 | 0.3117 | 2332.71 | 2333.687 | 6242.7  | 1 | 373.4                                                                                               | 37   | 3 R.ELSLTPITGAKPSATGYLGSVAAK.R       |
| gi 76150623 refseq |                    | 4      | 7      | 8.70%   | 808      | 88973   |   | 9.2 nucleolar protein 1, 120kDa [Homo sapiens]                                                      |      |                                      |
| gi 76150625 refseq |                    | 4      | 7      | 8.70%   | 808      | 88973   |   | 9.2 nucleolar protein 1, 120kDa [Homo sapiens]                                                      |      |                                      |
|                    | HsFLAG-ARP6_Ti_10  | 3.6018 | 0.1883 | 1183.57 | 1183.44  | 5109.7  | 6 | 1009.8                                                                                              | 88.9 | 2 K.RIQDIVGILR.D                     |
|                    | HsFLAG-ARP6_Ti_10  | 4.119  | 0.3245 | 1546.42 | 1546.723 | 6860.4  | 1 | 1033.1                                                                                              | 65.4 | 2 R.LGVTNTIISHYDGR.Q                 |
|                    | HsFLAG-ARP6_Ti_10  | 5.5514 | 0.4183 | 3199.01 | 3200.53  | 6333.3  | 1 | 989.1                                                                                               | 30.2 | 2 K.KFSNSIPQSQTGNSETATPTNVDLPQVIPK.S |
|                    | HsH2AZ-FLAG_293_1  | 3.7209 | 0.3352 | 1626.45 | 1626.677 | 8549.2  | 1 | 1230.5                                                                                              | 63.3 | 1 K.TQASSSFQDSSQPAGK.A               |
| gi 45593130 refseq |                    | 2      | 6      | 8.70%   | 549      | 61993   |   | 9.2 guanine nucleotide binding protein-like 3 isoform 1 [Homo sapiens]                              |      |                                      |

|               |                    |        |        |         |          |                                                                         |   |        |      |                                         |
|---------------|--------------------|--------|--------|---------|----------|-------------------------------------------------------------------------|---|--------|------|-----------------------------------------|
| gij45643129 r | 2                  | 6      | 8.90%  | 537     | 60540    | 8.8 guanine nucleotide binding protein-like 3 isoform 2 [Homo sapiens]  |   |        |      |                                         |
| gij45643127 r | 2                  | 6      | 8.90%  | 537     | 60540    | 8.8 guanine nucleotide binding protein-like 3 isoform 2 [Homo sapiens]  |   |        |      |                                         |
|               | HsFLAG-ARP6_Ti_1   | 5.3037 | 0.416  | 2530.34 | 2530.924 | 5765.1                                                                  | 1 | 1474.3 | 56.5 | 5 K.QITIIDSPSFIVSPLNSSSALALR.S          |
|               | HsFLAG-TIP49b_Ti_  | 4.7979 | 0.492  | 2442.49 | 2442.79  | 3930.3                                                                  | 1 | 757    | 54.3 | 1 R.SPASIEVVKPMEASAILSQADAR.Q           |
| gij4557237 re | 2                  | 3      | 8.70%  | 427     | 45200    | 8.8 acetyl-Coenzyme A acetyltransferase 1 precursor [Homo sapiens]      |   |        |      |                                         |
| *             | HsFLAG-p53-DNA-D   | 3.2709 | 0.3215 | 1702.4  | 1703.032 | 7185.7                                                                  | 1 | 805.1  | 56.2 | 2 R.TPIGSFLGSLSLLPATK.L                 |
| *             | HsFlag-NUFIP_Ti_11 | 3.8107 | 0.4401 | 1907.43 | 1908.186 | 7826.9                                                                  | 1 | 1019.1 | 52.6 | 1 K.VNINGGAVSLGHPIGMSGAR.I              |
| gij5454004 re | 2                  | 3      | 8.70%  | 391     | 44156    | 6.3 D4, zinc and double PHD fingers family 2 [Homo sapiens]             |   |        |      |                                         |
| *             | HsFlag-VPS71_Ti_10 | 2.5964 | 0.3436 | 1509.41 | 1509.559 | 4873.9                                                                  | 1 | 426.7  | 68.2 | 1 K.DAMEQCCHNYNAR.L                     |
| *             | HsFLAG-p53-DNA-D   | 4.3918 | 0.2332 | 2642.06 | 2642.697 | 7649.7                                                                  | 1 | 876    | 45.2 | 2 R.ILEPDDFLDDLDEDEYEDTPK.R             |
| gij21361659 r | 7                  | 23     | 8.60%  | 1041    | 115963   | 4.8 importin 9 [Homo sapiens]                                           |   |        |      |                                         |
| *             | HsH2AZ-FLAG_293_   | 3.7578 | 0.3293 | 1940.25 | 1941.232 | 5315.4                                                                  | 1 | 1026.8 | 64.7 | 4 K.EALVDTLTGILSPVQEV.R.A               |
| *             | HsH2AZ-FLAG_293_   | 2.7213 | 0.1962 | 1133.53 | 1133.249 | 3944.4                                                                  | 1 | 714.5  | 81.2 | 1 K.FRPPETTER.A                         |
| *             | HsH2AZ-FLAG_293_   | 3.7384 | 0.3453 | 1768.5  | 1767.976 | 5563.1                                                                  | 1 | 1379.5 | 73.3 | 2 K.YSNDPVVASLAQDIFK.E                  |
| *             | HsH2AZ-FLAG_293_   | 5.8874 | 0.4734 | 1884.52 | 1885.221 | 8706.5                                                                  | 1 | 2129.4 | 67.6 | 13 K.IPAGLCATAIDILTTVVR.N               |
| *             | HsH2AZ-FLAG_293_   | 4.0004 | 0.234  | 1886.03 | 1885.221 | 8342.5                                                                  | 1 | 1338.3 | 42.6 | 1 K.IPAGLCATAIDILTTVVR.N                |
| *             | HsH2AZ-FLAG_293_   | 3.5313 | 0.2941 | 1224.05 | 1224.359 | 7033.2                                                                  | 2 | 1499.7 | 85   | 1 K.LLQHGINADDK.R                       |
| *             | HsH2AZ-FLAG_293_   | 3.9278 | 0.4438 | 2253.29 | 2254.189 | 7478.7                                                                  | 1 | 1655.8 | 64.7 | 1 K.YEEDYYEDEDDPDALK.D                  |
| gij4557761 re | 6                  | 32     | 8.60%  | 934     | 104743   | 5.8 mutS homolog 2 [Homo sapiens]                                       |   |        |      |                                         |
| *             | HsFLAG-ARP6_Ti_1   | 3.0937 | 0.4429 | 1638.93 | 1639.91  | 3587.9                                                                  | 1 | 394.6  | 61.5 | 3 R.FFQGMPEKPTTTVR.L                    |
| *             | HsFlag-VPS71_Ti_10 | 5.2991 | 0.373  | 2478.8  | 2478.762 | 7912.9                                                                  | 1 | 1359.9 | 52.2 | 5 R.ALNLFQGSVEDTTGSQSLAALLNK.C          |
| *             | HsFLAG-ARP6_Ti_1   | 5.5593 | 0.3939 | 1942.15 | 1942.266 | 4177.8                                                                  | 1 | 1234.6 | 78.1 | 10 R.LYQGINQLPNVIALEK.H                 |
| *             | HsARP6-FLAG_Ti_1   | 3.869  | 0.3427 | 1570.72 | 1571.944 | 6485.2                                                                  | 1 | 1276.6 | 76.9 | 12 K.LLLAVFVTPPLDRL.S                   |
| *             | HsYL1_Ti_105.1427. | 2.5585 | 0.1685 | 1205.61 | 1206.446 | 2958.7                                                                  | 2 | 249    | 70   | 1 K.KMQSTLISAAR.D                       |
| *             | HsYL1_Ti_105.1424. | 3.2396 | 0.1729 | 1207.61 | 1206.446 | 4890.7                                                                  | 8 | 975.9  | 85   | 1 K.KMQSTLISAAR.D                       |
| gij25777671 r | 4                  | 10     | 8.60%  | 940     | 99058    | 9.2 protein phosphatase 1, regulatory subunit 10 [Homo sapiens]         |   |        |      |                                         |
| *             | HsFlag-DPCD_Ti_20  | 3.1409 | 0.2855 | 1709.72 | 1709.856 | 7648.6                                                                  | 4 | 642.7  | 50   | 2 K.RQSNVAAPGDATPPAEK.K                 |
| *             | HsFLAG-FLJ20309_   | 2.8022 | 0.2107 | 1893.45 | 1892.162 | 7429                                                                    | 1 | 674.4  | 50   | 1 R.PLVLPSPVTPGSNSQER.Y                 |
| *             | HsFLAG-p53-DNA-D   | 6.0894 | 0.4917 | 3303.79 | 3302.684 | 10621.8                                                                 | 1 | 1459.3 | 28.1 | 3 K.GPQGGGGGGINVQEILTSIMGSPNSHPSEELLK.Q |
| *             | HsFLAG-Lin9_Ti_20  | 3.8634 | 0.3643 | 1197.99 | 1198.203 | 9301.2                                                                  | 1 | 2193.5 | 83.3 | 4 R.GHDGPGHGGGGHR.G                     |
| gij58761546 r | 5                  | 14     | 8.60%  | 852     | 92903    | 6.5 amine oxidase (flavin containing) domain 2 isoform b [Homo sapiens] |   |        |      |                                         |
| *             | HsFlag-VPS71_Ti_10 | 3.2256 | 0.3262 | 2322.4  | 2320.607 | 7454.1                                                                  | 1 | 753.1  | 47.4 | 1 R.LLEATSYLSHQDFNVLNKN.P               |
| *             | HsFLAG-ARP6_Ti_1   | 3.0835 | 0.3099 | 1808.09 | 1807.02  | 3278.8                                                                  | 1 | 378.1  | 56.2 | 2 R.NGYSCVPVALAEGLDIK.L                 |
| *             | HsARP6-FLAG_Ti_1   | 2.5271 | 0.2391 | 1431.44 | 1430.689 | 6515.5                                                                  | 5 | 530    | 60   | 1 R.GELFLFWNLYK.A                       |
| *             | HsFLAG-FLJ20729_   | 3.1685 | 0.0826 | 1191.18 | 1191.375 | 7506                                                                    | 1 | 1047.1 | 83.3 | 2 R.LFFAGEHTIR.N                        |
| *             | HsFlag-VPS71_Ti_10 | 3.6715 | 0.3605 | 1569.54 | 1569.804 | 4688                                                                    | 1 | 650.8  | 64.3 | 8 R.NYPATVHGALLSGLR.E                   |
| gij4507457 re | 5                  | 6      | 8.60%  | 760     | 84901    | 6.6 transferrin receptor [Homo sapiens]                                 |   |        |      |                                         |
| *             | HsFLAG-ARP6_Ti_1   | 3.8803 | 0.2233 | 1748.7  | 1746.917 | 8316.6                                                                  | 1 | 749.9  | 53.3 | 1 R.SAFSNLFGGEPLSYTR.F                  |
| *             | HsFlag-VPS71_Ti_10 | 3.4942 | 0.3859 | 1562.19 | 1562.587 | 9354.6                                                                  | 1 | 1214.7 | 65.4 | 2 K.LAVDEEENADNNTK.A                    |
| *             | HsFLAG-ARP6_Ti_1   | 2.4215 | 0.3074 | 986.24  | 987.147  | 5706.2                                                                  | 1 | 490.4  | 68.8 | 1 K.LVHANFGTK.K                         |
| *             | HsFlag-VPS71_Ti_10 | 3.0222 | 0.3009 | 1435.18 | 1434.716 | 4389.3                                                                  | 2 | 464.8  | 62.5 | 1 K.VSASPLLYTLIEK.T                     |
| *             | HsFlag-VPS71_Ti_10 | 4.0624 | 0.3105 | 1566.6  | 1566.797 | 6360.3                                                                  | 1 | 1114.7 | 75   | 1 R.VEYHFLSPYVSPK.E                     |
| gij56243583 r | 3                  | 10     | 8.60%  | 432     | 47405    | 6.7 WD repeat domain 18 [Homo sapiens]                                  |   |        |      |                                         |

|                |                    |        |        |         |          |                                                                             |   |        |      |                                    |
|----------------|--------------------|--------|--------|---------|----------|-----------------------------------------------------------------------------|---|--------|------|------------------------------------|
| *              | HsH2AZ-FLAG_293_   | 4.5152 | 0.4649 | 1745.33 | 1745.072 | 8187.1                                                                      | 1 | 1754.4 | 68.8 | 7 R.GLALLNGEYLLAAQLGK.N            |
| *              | HsH2AZ-FLAG_293_   | 4.1864 | 0.2799 | 1331.49 | 1331.431 | 5772.6                                                                      | 1 | 1209.9 | 81.8 | 2 K.HLLGAEHGDEPR.H                 |
| *              | HsH2AZ-FLAG_293_   | 2.8601 | 0.2258 | 1001.22 | 1001.084 | 3387.1                                                                      | 1 | 607.7  | 85.7 | 1 R.DLDFDFSTR.F                    |
| gij 4503097 re | 2                  | 5      | 8.60%  | 350     | 41213    | 8.6 casein kinase 2, alpha prime polypeptide [Homo sapiens]                 |   |        |      |                                    |
| *              | HsFlag-FLJ90652_29 | 2.7839 | 0.2806 | 1349.44 | 1347.535 | 4519.4                                                                      | 1 | 585.8  | 75   | 1 K.PHNVMIDHQK.K                   |
| *              | HsFlag-FLJ90652_29 | 4.2892 | 0.4363 | 2321.98 | 2322.585 | 8346.8                                                                      | 1 | 1162.7 | 58.3 | 4 R.LIDWGLAEFYHPAQEYNVR.V          |
| gij 13435356 r | 1                  | 2      | 8.60%  | 279     | 31621    | 4.9 HCLS1 associated protein X-1 isoform a [Homo sapiens]                   |   |        |      |                                    |
| gij 66363694 r | 1                  | 2      | 10.40% | 231     | 26100    | 5.2 HCLS1 associated protein X-1 isoform b [Homo sapiens]                   |   |        |      |                                    |
|                | HsFLAG-TCF3_Ti_10  | 4.7822 | 0.2159 | 2599.44 | 2599.903 | 8085.9                                                                      | 1 | 1330.6 | 33.7 | 2 R.GDPESPRPPALDDAFSILDFLGR.W      |
| gij 4507659 re | 14                 | 41     | 8.50%  | 2349    | 265598   | 5.1 translocated promoter region (to activated MET oncogene) [Homo sapiens] |   |        |      |                                    |
| *              | HsARP6-FLAG_Ti_10  | 3.1344 | 0.0863 | 1568.41 | 1567.733 | 7322.6                                                                      | 1 | 1078.4 | 66.7 | 3 R.LSQELEYLTEDVK.R                |
| *              | HsFlag-VPS71_Ti_10 | 4.2174 | 0.4379 | 2835.96 | 2836.255 | 3423.1                                                                      | 1 | 323.3  | 37   | 2 R.ILLSQTGTVAIPLHASSLDDVSLASTPK.R |
| *              | HsFLAG-p53-DNA-D   | 4.7857 | 0.4493 | 2836.08 | 2836.255 | 7057.2                                                                      | 1 | 1583.9 | 36.1 | 4 R.ILLSQTGTVAIPLHASSLDDVSLASTPK.R |
| *              | HsFLAG-p53-DNA-D   | 6.1986 | 0.4876 | 2696.1  | 2697.015 | 8167.5                                                                      | 1 | 1453.2 | 36   | 4 K.RPSTSQTVSTPAPVPVIESTEAEIAK.A   |
| *              | HsFLAG-p53-DNA-D   | 6.6144 | 0.5285 | 2024.8  | 2025.356 | 11049.1                                                                     | 1 | 3418.4 | 76.5 | 12 R.GQNLLLTNLQTIQGILER.S          |
| *              | HsARP6-FLAG_Ti_10  | 4.9281 | 0.3905 | 2025.25 | 2025.356 | 9448.6                                                                      | 1 | 1531.1 | 41.2 | 1 R.GQNLLLTNLQTIQGILER.S           |
| *              | HsFlag-VPS71_Ti_10 | 4.6183 | 0.3598 | 2461.05 | 2460.672 | 8179.6                                                                      | 1 | 1516.6 | 54.8 | 1 K.TSTSNVEQYQAMVTSLEESLNK.E       |
| *              | HsFlag-VPS71_Ti_10 | 3.2803 | 0.2567 | 1803.9  | 1803.921 | 8463.4                                                                      | 1 | 940.4  | 60.7 | 1 R.ELQELEDSLNAERЕК.V              |
| *              | HsFLAG-ARP6_Ti_10  | 4.6919 | 0.3476 | 2154.32 | 2154.466 | 3697.3                                                                      | 1 | 779.2  | 66.7 | 3 R.KLELDILPLQEANAELSEK.S          |
| *              | HsARP6-FLAG_Ti_10  | 3.6896 | 0.2558 | 2156.13 | 2154.466 | 6534.4                                                                      | 2 | 664.9  | 34.7 | 1 R.KLELDILPLQEANAELSEK.S          |
| *              | HsFlag-VPS71_Ti_10 | 3.5027 | 0.176  | 1343.52 | 1343.526 | 6519.8                                                                      | 1 | 931    | 75   | 2 K.RIQQLTEEIGR.L                  |
| *              | HsFLAG-p53-DNA-D   | 2.0164 | 0.1388 | 808.67  | 808.999  | 3891.4                                                                      | 2 | 474.8  | 78.6 | 2 K.IAHLAGVK.D                     |
| *              | HsFlag-VPS71_Ti_10 | 3.9117 | 0.103  | 2366.07 | 2366.674 | 4080.1                                                                      | 1 | 453.5  | 47.8 | 3 R.GIASTSDPPTANIKPTPVVSTPSK.V     |
| *              | HsFLAG-p53-DNA-D   | 2.9852 | 0.2762 | 1753.94 | 1754.042 | 3579.6                                                                      | 1 | 530.7  | 63.3 | 2 R.LTIHAPPQELGPPVQR.I             |
| gij 19924129 r | 8                  | 21     | 8.50%  | 1312    | 153892   | 6.9 RAD50 homolog isoform 1 [Homo sapiens]                                  |   |        |      |                                    |
| *              | HsFlag-VPS71_Ti_10 | 4.0932 | 0.4407 | 2074.93 | 2074.471 | 5867.5                                                                      | 1 | 811.3  | 52.6 | 6 K.QIITFFSPLTILVGPNGAGK.T         |
|                | HsFlag-VPS71_Ti_10 | 3.8304 | 0.3613 | 2036.84 | 2036.246 | 8886.2                                                                      | 1 | 1415.1 | 55.9 | 2 R.DSLIQSLATQLELDGFER.G           |
|                | HsFlag-VPS71_Ti_10 | 4.0794 | 0.3146 | 1512.67 | 1512.616 | 8129.3                                                                      | 1 | 1565.8 | 86.4 | 1 K.RKEEQQLSSYEDK.L                |
|                | HsFlag-VPS71_Ti_10 | 4.4925 | 0.3993 | 2064.96 | 2065.285 | 7139.6                                                                      | 1 | 1508.5 | 61.8 | 4 R.VFQTEAELQEVISDLQSK.L           |
|                | HsFlag-DPCD_Ti_20  | 5.3788 | 0.2867 | 2066.28 | 2065.285 | 7959.3                                                                      | 2 | 1627.4 | 45.6 | 1 R.VFQTEAELQEVISDLQSK.L           |
|                | HsFlag-DPCD_Ti_20  | 3.9081 | 0.4002 | 2377.89 | 2377.579 | 8671.5                                                                      | 1 | 746    | 45   | 1 K.NDIEEQETLLGTIMPEESAK.V         |
|                | HsFLAG-FLJ20729_   | 4.1175 | 0.2165 | 1621.22 | 1621.834 | 11041.2                                                                     | 1 | 1765.9 | 75   | 4 K.LIQDQQEQIQHLK.S                |
|                | HsFLAG-FLJ20729_   | 3.2146 | 0.2958 | 1051.27 | 1051.197 | 5841.8                                                                      | 1 | 822.7  | 87.5 | 2 K.RNHNLALGR.Q                    |
| gij 4758304 re | 3                  | 3      | 8.50%  | 645     | 72933    | 5.1 protein disulfide isomerase-associated 4 [Homo sapiens]                 |   |        |      |                                    |
| *              | HsFLAG-p53-DNA-D   | 2.9752 | 0.2611 | 2136.86 | 2137.437 | 3884.1                                                                      | 3 | 261.1  | 41.7 | 1 R.EVSQPDWTPPPPEVTLVLTK.E         |
| *              | HsFLAG-FLJ20729_   | 3.3432 | 0.2671 | 1737.28 | 1735.925 | 10803.9                                                                     | 1 | 936.5  | 53.3 | 1 R.SHMMDVQGSTQDSAИK.D             |
| *              | HsFLAG-ARP6_Ti_10  | 2.8022 | 0.3141 | 2310.04 | 2310.432 | 9042.4                                                                      | 1 | 602.8  | 42.1 | 1 K.DFPEYTFAIAD EEDYAGEVK.D        |
| gij 16117787 r | 1                  | 2      | 8.50%  | 117     | 13293    | 11.5 ribosomal protein L34 [Homo sapiens]                                   |   |        |      |                                    |
| gij 89036972 r | 1                  | 2      | 8.00%  | 125     | 14515    | 11.4 PREDICTED: similar to ribosomal protein L34 [Homo sapiens]             |   |        |      |                                    |
| gij 89036654 r | 1                  | 2      | 18.50% | 54      | 6255     | 10.9 PREDICTED: similar to ribosomal protein L34 [Homo sapiens]             |   |        |      |                                    |
| gij 16117789 r | 1                  | 2      | 8.50%  | 117     | 13293    | 11.5 ribosomal protein L34 [Homo sapiens]                                   |   |        |      |                                    |
|                | HsFLAG-ARP6_Ti_10  | 2.827  | 0.0908 | 1155.59 | 1154.268 | 7431.8                                                                      | 3 | 1035.4 | 77.8 | 2 R.RLSYNTASNK.T                   |
| gij 13435359 r | 5                  | 11     | 8.40%  | 1140    | 126988   | 5.3 damage-specific DNA binding protein 1 [Homo sapiens]                    |   |        |      |                                    |

|             |    |                    |        |        |         |          |        |                                                                                                             |
|-------------|----|--------------------|--------|--------|---------|----------|--------|-------------------------------------------------------------------------------------------------------------|
| gi 89034790 | r  | 5                  | 11     | 8.40%  | 1140    | 126968   | 5.3    | PREDICTED: similar to DNA damage binding protein 1 (Damage-specific DNA binding protein 1) (DDB p127 s      |
| gi 89034782 | r  | 5                  | 11     | 8.40%  | 1140    | 126968   | 5.3    | PREDICTED: similar to DNA damage binding protein 1 (Damage-specific DNA binding protein 1) (DDB p127 s      |
|             |    | HsFLAG-ARP6_Ti_1   | 2.8356 | 0.2085 | 1195.13 | 1195.401 | 4085.1 | 1 777.7 83.3 1 R.LEELHVIDVK.F                                                                               |
|             |    | HsFLAG-ARP6_Ti_1   | 3.5925 | 0.364  | 2420.86 | 2421.647 | 8036   | 1 1167.1 52.6 1 K.FLYGCQAPTICFVYQDPQGR.H                                                                    |
|             |    | HsFLAG-ARP6_Ti_1   | 4.3968 | 0.3842 | 2585.47 | 2585.799 | 5749.6 | 1 923.4 34.1 1 R.SLSTTNVFCSDRPTVIYSSNHK.L                                                                   |
|             |    | HsFlag-VPS71_Ti_1  | 3.5482 | 0.2356 | 2182.8  | 2181.555 | 3391.7 | 1 326.8 50 3 R.SVLLLAYKPMEGNFEEIAR.D                                                                        |
|             |    | HsFlag-VPS71_Ti_1  | 6.0234 | 0.3726 | 2651.33 | 2650.988 | 6654.5 | 1 1319.5 38 5 R.KTEPATGFIDGLIESFLDISRPK.M                                                                   |
| gi 38202257 | r  | 6                  | 19     | 8.40%  | 944     | 106874   | 6.1    | alpha glucosidase II alpha subunit isoform 2 [Homo sapiens]                                                 |
| gi 38230585 | r  | 6                  | 19     | 8.20%  | 963     | 109042   | 6.2    | alpha glucosidase II alpha subunit isoform 3 [Homo sapiens]                                                 |
|             |    | HsFLAG-ARP6_Ti_1   | 3.0581 | 0.1542 | 1105.24 | 1105.366 | 5537.2 | 2 1272.8 77.8 3 K.LVAIVDPHIK.V                                                                              |
|             |    | HsFLAG-ARP6_Ti_1   | 2.8057 | 0.2627 | 1320.39 | 1320.552 | 6949.9 | 1 913.9 72.7 1 R.SGGMERPFVLAR.A                                                                             |
|             |    | HsFlag-VPS71_Ti_1  | 2.6033 | 0.3021 | 977.59  | 978.055  | 5850.7 | 1 538.1 75 1 R.AHAHLDTGR.R                                                                                  |
|             |    | HsFLAG-ARP6_Ti_1   | 3.0657 | 0.2941 | 2072.82 | 2072.417 | 5019.1 | 1 391.5 50 1 R.YSLLPFWYTYLLYQHR.E                                                                           |
|             |    | HsFlag-VPS71_Ti_1  | 4.5714 | 0.4201 | 1666.56 | 1665.073 | 4977.3 | 1 1030.2 68.8 10 R.VVIIGAGKPAAVVLQTK.G                                                                      |
|             |    | HsFLAG-p53-DNA-D   | 3.5123 | 0.2661 | 1742.71 | 1741.985 | 5222.1 | 3 669.7 60.7 3 R.LSFQHPETSVLVLR.K                                                                           |
| gi 63252886 | r  | 4                  | 6      | 8.40%  | 534     | 60967    | 6      | prolyl 4-hydroxylase, alpha I subunit isoform 1 precursor [Homo sapiens]                                    |
| gi 63252888 | r  | 4                  | 6      | 8.40%  | 534     | 61049    | 6      | prolyl 4-hydroxylase, alpha I subunit isoform 2 precursor [Homo sapiens]                                    |
|             |    | HsFLAG-TIP49b_Ti_1 | 2.5955 | 0.176  | 1845.04 | 1845.106 | 8220.2 | 2 521.6 50 1 K.RLNTEWSELENLVLK.D                                                                            |
|             |    | HsFLAG-TCF3_Ti_1   | 3.393  | 0.3059 | 2179.22 | 2177.416 | 7189.7 | 1 638.6 47.2 1 K.VSVLDYLSYAVYQQGDLK.A                                                                       |
|             |    | HsFLAG-TIP49b_Ti_1 | 2.6091 | 0.2969 | 1165.54 | 1166.332 | 6268.6 | 1 572.5 60 2 R.HAACPVLVGNK.W                                                                                |
|             |    | HsFLAG-TIP49b_Ti_1 | 3.9774 | 0.4209 | 1166.14 | 1166.332 | 7022.2 | 1 1769.5 90 2 R.HAACPVLVGNK.W                                                                               |
| gi 6857818  | re | 1                  | 3      | 8.40%  | 178     | 19344    | 4.6    | nucleophosmin/nucleoplasmin 3 [Homo sapiens]                                                                |
| *           |    | HsFLAG-p53-DNA-D   | 4.5363 | 0.3628 | 1684.86 | 1685.88  | 6069   | 1 1266.9 75 3 R.NHDHQEIAVPVANLK.L                                                                           |
| gi 18104971 | r  | 1                  | 4      | 8.40%  | 167     | 19127    | 8.4    | protein tyrosine phosphatase type IVA, member 2 isoform 1 [Homo sapiens]                                    |
| gi 88947673 | r  | 1                  | 4      | 8.40%  | 167     | 19127    | 8.4    | PREDICTED: similar to Protein tyrosine phosphatase type IVA protein 2 (Protein-tyrosine phosphatase 4a2) (F |
| gi 88947671 | r  | 1                  | 4      | 8.40%  | 167     | 19127    | 8.4    | PREDICTED: similar to Protein tyrosine phosphatase type IVA protein 2 (Protein-tyrosine phosphatase 4a2) (F |
| gi 88947669 | r  | 1                  | 4      | 8.40%  | 167     | 19127    | 8.4    | PREDICTED: similar to Protein tyrosine phosphatase type IVA protein 2 (Protein-tyrosine phosphatase 4a2) (F |
| gi 88947667 | r  | 1                  | 4      | 8.40%  | 167     | 19127    | 8.4    | PREDICTED: similar to Protein tyrosine phosphatase type IVA protein 2 (Protein-tyrosine phosphatase 4a2) (F |
| gi 88947665 | r  | 1                  | 4      | 8.40%  | 167     | 19127    | 8.4    | PREDICTED: similar to Protein tyrosine phosphatase type IVA protein 2 (Protein-tyrosine phosphatase 4a2) (F |
| gi 88947663 | r  | 1                  | 4      | 8.40%  | 167     | 19127    | 8.4    | PREDICTED: similar to Protein tyrosine phosphatase type IVA protein 2 (Protein-tyrosine phosphatase 4a2) (F |
| gi 88947661 | r  | 1                  | 4      | 8.40%  | 167     | 19127    | 8.4    | PREDICTED: similar to Protein tyrosine phosphatase type IVA protein 2 (Protein-tyrosine phosphatase 4a2) (F |
| gi 88947659 | r  | 1                  | 4      | 8.40%  | 167     | 19127    | 8.4    | PREDICTED: similar to Protein tyrosine phosphatase type IVA protein 2 (Protein-tyrosine phosphatase 4a2) (F |
| gi 88947657 | r  | 1                  | 4      | 10.30% | 136     | 15669    | 8.5    | PREDICTED: similar to Protein tyrosine phosphatase type IVA protein 2 (Protein-tyrosine phosphatase 4a2) (F |
| gi 88947653 | r  | 1                  | 4      | 13.10% | 107     | 12071    | 5.8    | PREDICTED: similar to Protein tyrosine phosphatase type IVA protein 2 (Protein-tyrosine phosphatase 4a2) (F |
| gi 88947651 | r  | 1                  | 4      | 19.20% | 73      | 8167     | 6.5    | PREDICTED: similar to Protein tyrosine phosphatase type IVA protein 2 (Protein-tyrosine phosphatase 4a2) (F |
| gi 88947649 | r  | 1                  | 4      | 9.90%  | 142     | 16367    | 8.6    | PREDICTED: similar to Protein tyrosine phosphatase type IVA protein 2 (Protein-tyrosine phosphatase 4a2) (F |
| gi 88947647 | r  | 1                  | 4      | 13.10% | 107     | 12071    | 5.8    | PREDICTED: similar to Protein tyrosine phosphatase type IVA protein 2 (Protein-tyrosine phosphatase 4a2) (F |
| gi 88947645 | r  | 1                  | 4      | 21.20% | 66      | 7494     | 7.4    | PREDICTED: similar to Protein tyrosine phosphatase type IVA protein 2 (Protein-tyrosine phosphatase 4a2) (F |
| gi 4506285  | re | 1                  | 4      | 8.40%  | 167     | 19127    | 8.4    | protein tyrosine phosphatase type IVA, member 2 isoform 1 [Homo sapiens]                                    |
| gi 4506283  | re | 1                  | 4      | 8.10%  | 173     | 19815    | 9      | protein tyrosine phosphatase type IVA, member 1 [Homo sapiens]                                              |
| gi 18104973 | r  | 1                  | 4      | 17.10% | 82      | 9241     | 8.7    | protein tyrosine phosphatase type IVA, member 2 isoform 2 [Homo sapiens]                                    |
|             |    | HsFLAG-Lin9_Ti_20  | 3.405  | 0.1138 | 1584.44 | 1584.815 | 6967.8 | 1 1729.2 80.8 4 R.FLITHNPTNATLNK.F                                                                          |
| gi 7662238  | re | 7                  | 28     | 8.30%  | 1341    | 151887   | 6.4    | apoptotic chromatin condensation inducer 1 [Homo sapiens]                                                   |

|                |                    |        |        |         |          |         |   |        |      |    |                                                                                     |
|----------------|--------------------|--------|--------|---------|----------|---------|---|--------|------|----|-------------------------------------------------------------------------------------|
| *              | HsSrcap_Ti_201.061 | 5.2211 | 0.4327 | 2119.54 | 2119.117 | 4450.6  | 1 | 1021.3 | 66.7 | 2  | K.LSEGSQPAEEEEEDQETPSR.N                                                            |
| *              | HsFLAG-Lin9_Ti_20  | 3.2513 | 0.3371 | 1722.79 | 1722.078 | 5729.3  | 1 | 910.5  | 63.3 | 7  | R.SAQPLPLKIEELALAK.G                                                                |
| *              | HsFlag-NUFIP_Ti_1C | 3.7227 | 0.3504 | 2364.03 | 2364.581 | 3577.4  | 3 | 298.8  | 40.5 | 1  | K.DPSSGQEVATPPVPLQVCEPK.E                                                           |
| *              | HsFlag-NUFIP_Ti_2C | 3.3112 | 0.254  | 1304.33 | 1304.527 | 6593.2  | 1 | 833.5  | 72.7 | 5  | K.KPSISITTESLK.S                                                                    |
| *              | HsFLAG-FLJ20309_   | 3.6151 | 0.2805 | 1509.46 | 1509.699 | 7129.9  | 1 | 1094.9 | 66.7 | 1  | R.TGTLVEEAFWIDK.I                                                                   |
| *              | HsFlag-NUFIP_Ti_2C | 3.0485 | 0.2698 | 1215.41 | 1215.392 | 7278    | 2 | 915.2  | 70   | 2  | R.GLLVDRPSETK.T                                                                     |
| *              | HsFLAG-p53-DNA-D   | 4.6448 | 0.4005 | 2105.42 | 2104.42  | 4181.2  | 1 | 965.5  | 70.6 | 10 | K.AAPCIYWLPLTDSQIVQK.E                                                              |
| gij 13376202 r |                    | 4      | 23     | 8.30%   | 612      | 69449   |   |        |      |    | 7.8 hypothetical protein LOC79871 [Homo sapiens]                                    |
| *              | HsFlag-FLJ20643_Ti | 3.7019 | 0.3208 | 1520.67 | 1520.596 | 7740    | 1 | 1169.1 | 69.2 | 2  | K.VNTQSSSNSTLPER.L                                                                  |
| *              | HsFLAG-UTX1_Ti_2i  | 2.5378 | 0.0806 | 1676.56 | 1675.922 | 4509.1  | 4 | 451.5  | 56.7 | 1  | R.GSGTAIKPLPSYENLK.K                                                                |
| *              | HsFLAG-BC014022_   | 4.8512 | 0.432  | 2295.68 | 2295.811 | 8335.9  | 1 | 1236.4 | 37.5 | 3  | K.VLPGLLVPLQITLGDITYQLK.N                                                           |
| *              | HsFlag-NUFIP_Ti_1C | 4.9609 | 0.4539 | 2296.01 | 2295.811 | 4098.9  | 1 | 1021.7 | 65   | 17 | K.VLPGLLVPLQITLGDITYQLK.N                                                           |
| gij 31542539 r |                    | 2      | 2      | 8.30%   | 480      | 52538   |   |        |      |    | 9.3 DnaJ (Hsp40) homolog, subfamily A, member 3 [Homo sapiens]                      |
| *              | HsSrcap_Ti_205.214 | 3.3523 | 0.3037 | 1824.65 | 1825.136 | 6730.8  | 2 | 484.3  | 50   | 1  | K.RVMIPVPAGVEDGQTVR.M                                                               |
| *              | HsFLAG-TCF3_Ti_1i  | 2.5869 | 0.2193 | 2342.3  | 2342.614 | 12796.1 | 8 | 521.5  | 34.1 | 1  | R.DGADIHSDLFISIAQALLGGTAR.A                                                         |
| gij 11496885 r |                    | 1      | 2      | 8.30%   | 457      | 49845   |   |        |      |    | 8.4 enigma protein isoform 1 [Homo sapiens]                                         |
| gij 42741675 r |                    | 1      | 2      | 9.00%   | 423      | 46510   |   |        |      |    | 8.3 enigma protein isoform 2 [Homo sapiens]                                         |
|                | HsSrcap_Ti_203.280 | 4.1276 | 0.2647 | 3956.41 | 3956.32  | 8779.2  | 2 | 414    | 18.2 | 2  | Y                                                                                   |
| gij 4507499 re |                    | 2      | 2      | 8.30%   | 375      | 41591   |   |        |      |    | 7.8 TIA-1 related protein isoform 1 [Homo sapiens]                                  |
| *              | HsFLAG-Lin9_Ti_20  | 3.863  | 0.2107 | 2063.62 | 2061.392 | 9570.8  | 1 | 1471.5 | 55.9 | 1  | R.DVTEVLILQLFSQIGPCK.S                                                              |
|                | HsFlag-VPS71_Ti_1i | 2.8324 | 0.3193 | 1553.32 | 1554.804 | 6457.2  | 1 | 538.2  | 62.5 | 1  | R.QTFSPFGQIMEIR.V                                                                   |
| gij 6005747 re |                    | 2      | 4      | 8.30%   | 336      | 37655   |   |        |      |    | 6.8 ring finger protein 2 [Homo sapiens]                                            |
|                | HsFLAG-p53-DNA-D   | 3.5612 | 0.1582 | 1573.08 | 1573.789 | 5002.7  | 4 | 434.1  | 53.8 | 3  | R.SLRPDPNFDALISK.I                                                                  |
| *              | HsFLAG-Lin9_Ti_20  | 2.6233 | 0.2042 | 1794.17 | 1793.89  | 9231.7  | 4 | 476.2  | 46.2 | 1  | K.IYPSRDEYEAHQER.V                                                                  |
| gij 7705608 re |                    | 2      | 3      | 8.30%   | 314      | 34582   |   |        |      |    | 8.2 fumarylacetoacetate hydrolase domain containing 2A [Homo sapiens]               |
|                | HsFLAG-ARP8_Ti_2   | 2.7245 | 0.2273 | 1305.87 | 1305.61  | 8753.5  | 1 | 980.7  | 72.7 | 2  | R.RALAAQLPVLPR.S                                                                    |
| *              | HsFlag-NUFIP_Ti_2C | 2.9226 | 0.2235 | 1560.39 | 1560.791 | 6677.1  | 3 | 412    | 50   | 1  | R.SEVTFLAPVTRPDK.V                                                                  |
| gij 4503659 re |                    | 2      | 5      | 8.30%   | 133      | 14390   |   |        |      |    | 10.2 ubiquitin-like protein fubi and ribosomal protein S30 precursor [Homo sapiens] |
| *              | HsFlag-NUFIP_Ti_11 | 3.2691 | 0.1723 | 1265.28 | 1264.513 | 4535.3  | 1 | 811.9  | 85   | 4  | R.RFVNVVPTFGK.K                                                                     |
| *              | HsFLAG-TCF3_Ti_1i  | 2.3441 | 0.2169 | 1107.46 | 1108.326 | 4356.5  | 1 | 564.7  | 77.8 | 1  | R.FVNVVPTFGK.K                                                                      |
| gij 70166852 r |                    | 6      | 11     | 8.20%   | 1226     | 135967  |   |        |      |    | 8.6 adenosine deaminase, RNA-specific isoform a [Homo sapiens]                      |
| gij 70167113 r |                    | 6      | 11     | 10.80%  | 931      | 103642  |   |        |      |    | 8.7 adenosine deaminase, RNA-specific isoform d [Homo sapiens]                      |
| gij 70167032 r |                    | 6      | 11     | 8.60%   | 1181     | 131070  |   |        |      |    | 8.6 adenosine deaminase, RNA-specific isoform c [Homo sapiens]                      |
| gij 70166944 r |                    | 6      | 11     | 8.40%   | 1200     | 133175  |   |        |      |    | 8.5 adenosine deaminase, RNA-specific isoform b [Homo sapiens]                      |
|                | HsFlag-VPS71_Ti_1i | 4.1147 | 0.3686 | 2030.13 | 2031.236 | 7586.5  | 1 | 1155.2 | 64.7 | 1  | K.ICDYLFNVSDSSALNLA.N                                                               |
|                | HsFLAG-ARP6_Ti_1i  | 3.6525 | 0.455  | 1736.29 | 1737.044 | 3522.7  | 1 | 637.7  | 67.9 | 1  | R.AIMEMPSFYSHGLPR.C                                                                 |
|                | HsFLAG-ARP6_Ti_1i  | 3.6024 | 0.3849 | 1843.95 | 1844.973 | 5325.6  | 1 | 475.3  | 50   | 2  | K.TAESQTTPSATSFSGK.S                                                                |
|                | HsFLAG-p53-DNA-D   | 3.5229 | 0.3592 | 2144.46 | 2145.386 | 8174    | 1 | 806.4  | 50   | 1  | K.FQYCVAVGAQTFPSVSAPSK.K                                                            |
|                | HsFLAG-ARP6_Ti_1i  | 4.4553 | 0.362  | 1680.59 | 1680.901 | 4242.4  | 1 | 1080.6 | 82.1 | 2  | R.YLNTNPVGGLEYAR.S                                                                  |
|                | HsFLAG-ARP6_Ti_1   | 3.2001 | 0.4027 | 1678.97 | 1679.916 | 8229.2  | 1 | 587.3  | 50   | 4  | K.SVTLGYLFSQGHLTR.A                                                                 |
| gij 42734339 r |                    | 4      | 9      | 8.20%   | 906      | 102387  |   |        |      |    | 6.8 hypothetical protein LOC55215 [Homo sapiens]                                    |
| *              | HsYL1_Ti_103.3375. | 4.1551 | 0.379  | 1876.58 | 1876.178 | 8195.1  | 1 | 992.7  | 56.2 | 3  | R.NSQLANSVMQTLTLLSQLK.Q                                                             |
| *              | HsFLAG-Lin9_Ti_20  | 5.5926 | 0.4641 | 3897.89 | 3899.078 | 7936.3  | 1 | 1448   | 30.5 | 3  | K.NTVIPLQQGEEEEEEEFYEDLDDILESITNR.M                                                 |

|               |                    |        |        |         |          |        |   |        |      |   |                                                                                              |
|---------------|--------------------|--------|--------|---------|----------|--------|---|--------|------|---|----------------------------------------------------------------------------------------------|
| *             | HsARP6-FLAG_Ti_1   | 3.1896 | 0.323  | 1487.33 | 1487.82  | 8968.6 | 1 | 1194.5 | 65.4 | 1 | K.EALLLVTVLTSLSK.L                                                                           |
| *             | HsFLAG-ARP6_Ti_1   | 3.2476 | 0.3378 | 1185.43 | 1185.371 | 5895.2 | 1 | 1462.5 | 94.4 | 2 | K.TNHFAIVNLR.T                                                                               |
| gi 56118310 r |                    | 2      | 3      | 8.20%   | 243      | 27296  |   |        |      |   | 5.1 nuclear ubiquitous casein kinase and cyclin-dependent kinase substrate [Homo sapiens]    |
| *             | HsFLAG-p53-DNA-D   | 4.03   | 0.3807 | 2365.94 | 2367.401 | 7903.4 | 1 | 754    | 50   | 1 | R.KVVDYSQFQESDDADEDYGR.D                                                                     |
| *             | HsFLAG-ARP6_Ti_1   | 5.313  | 0.4866 | 2239.13 | 2239.227 | 7447.9 | 1 | 1337.8 | 61.1 | 2 | K.VVDYSQFQESDDADEDYGR.D                                                                      |
| gi 42544179 r |                    | 4      | 6      | 8.10%   | 898      | 100045 |   |        |      |   | 6.1 Cip1-interacting zinc finger protein [Homo sapiens]                                      |
| *             | HsSrcap_Ti_203.156 | 4.2277 | 0.2975 | 1980.57 | 1980.148 | 6577.4 | 1 | 898.6  | 58.8 | 3 | K.RTPEPEPECEASELPAK.R                                                                        |
| *             | HsScrap_Ti_104.163 | 3.2296 | 0.351  | 1836.98 | 1837.043 | 6009.9 | 1 | 592.6  | 56.7 | 1 | K.QAQTQTSPEHLVLQKQ.K                                                                         |
| *             | HsSrcap_Ti_204.203 | 3.415  | 0.37   | 2885.9  | 2887.216 | 7662.4 | 1 | 672.7  | 35.7 | 1 | R.AFSTVPLTPVPRPSDSVSSTPAATSTPSK.Q                                                            |
| *             | HsSrcap_Ti_204.169 | 2.61   | 0.1263 | 1172.43 | 1173.314 | 6927.4 | 3 | 609.7  | 66.7 | 1 | K.SLGHFENLQK.Y                                                                               |
| gi 33239445 r |                    | 4      | 16     | 8.10%   | 814      | 92482  |   |        |      |   | 5 eukaryotic translation initiation factor 3, subunit 9 eta, 116kDa isoform a [Homo sapiens] |
| *             | HsFlag-VPS71_Ti_10 | 4.5115 | 0.2286 | 3233.19 | 3232.719 | 5278.5 | 8 | 348.2  | 23.1 | 1 | R.YLVTFSPMLDQDDPQAIHWDLTGHK.K                                                                |
| *             | HsSrcap_Ti_202.463 | 4.7414 | 0.4246 | 2166.31 | 2166.397 | 6602.8 | 1 | 835.2  | 50   | 9 | K.DFSWSPGGNIIAFVWPEDK.D                                                                      |
| *             | HsFLAG-ARP6_Ti_1   | 3.1951 | 0.3167 | 1097.4  | 1097.262 | 6523.3 | 1 | 1139.5 | 77.8 | 5 | K.FAVLHGEAPR.I                                                                               |
| *             | HsFlag-FLJ90652_2  | 2.8308 | 0.2057 | 1080.3  | 1080.272 | 5733   | 2 | 722.3  | 81.2 | 1 | R.ISVSFYHVK.N                                                                                |
| gi 8922358 re |                    | 2      | 2      | 8.10%   | 546      | 64441  |   |        |      |   | 10.5 PRP38 pre-mRNA processing factor 38 (yeast) domain containing B [Homo sapiens]          |
| *             | HsFlag-VPS71_Ti_10 | 4.4158 | 0.3698 | 2199.28 | 2198.644 | 5653   | 1 | 1328.8 | 66.7 | 1 | K.TMNLNPMILTNILSSPYFK.V                                                                      |
| *             | HsFLAG-Lin9_Ti_20  | 3.8742 | 0.3758 | 3107.35 | 3105.294 | 4952.3 | 1 | 298.8  | 37.5 | 1 | R.YTQPPTDLWDFESFLDDEEDLDVK.A                                                                 |
| gi 31563334 r |                    | 2      | 2      | 8.10%   | 614      | 64256  |   |        |      |   | 9.6 forkhead box K2 isoform 2 [Homo sapiens]                                                 |
| gi 89043065 r |                    | 2      | 2      | 10.60%  | 471      | 49706  |   |        |      |   | 9.4 PREDICTED: similar to forkhead box K2 isoform 1 isoform 7 [Homo sapiens]                 |
| gi 89043061 r |                    | 2      | 2      | 10.10%  | 494      | 52411  |   |        |      |   | 9.2 PREDICTED: similar to forkhead box K2 isoform 2 isoform 5 [Homo sapiens]                 |
| gi 89043059 r |                    | 2      | 2      | 9.30%   | 540      | 57217  |   |        |      |   | 9.1 PREDICTED: similar to forkhead box K2 isoform 1 isoform 4 [Homo sapiens]                 |
| gi 31563338 r |                    | 2      | 2      | 7.60%   | 660      | 69062  |   |        |      |   | 9.5 forkhead box K2 isoform 1 [Homo sapiens]                                                 |
|               | HsFLAG-FLJ20436_   | 3.6795 | 0.3564 | 2185.32 | 2184.5   | 4407.8 | 1 | 553.5  | 50   | 1 | R.FAQSAPGSPLSSQPVLITVQR.Q                                                                    |
|               | HsFLAG-Lin9_Ti_20  | 4.5169 | 0.3038 | 3153.11 | 3153.693 | 6138.3 | 1 | 520    | 24.1 | 1 | R.IIQTATTPVQTVTIVQQAPLGQHQPLPIK.T                                                            |
| gi 5453629 re |                    | 2      | 12     | 8.10%   | 406      | 44820  |   |        |      |   | 5.2 dynactin 2 [Homo sapiens]                                                                |
| *             | HsFlag-NUFIP_Ti_20 | 4.8187 | 0.4127 | 1865.67 | 1866.122 | 8189   | 1 | 1295.9 | 58.3 | 9 | K.LLGPDAAINLTDPDGALAK.R                                                                      |
| *             | HsFLAG-p53-DNA-D   | 3.9745 | 0.3015 | 1597.26 | 1597.855 | 5931.3 | 1 | 1312.8 | 76.9 | 3 | R.WSPIASTLPELVQR.L                                                                           |
| gi 11321581 r |                    | 2      | 10     | 8.10%   | 333      | 35059  |   |        |      |   | 8.9 succinate-CoA ligase, GDP-forming, alpha subunit [Homo sapiens]                          |
| *             | HsFLAG-TIP49b_Ti_  | 4.1108 | 0.3213 | 1568.62 | 1568.816 | 6386.6 | 1 | 1321   | 71.4 | 6 | K.GGQTHLGLPVFNTVK.E                                                                          |
| *             | HsFLAG-TIP49b_Ti_  | 3.608  | 0.3045 | 1082.41 | 1083.294 | 6093.7 | 1 | 1044.6 | 72.7 | 4 | R.MGHAGAIAGGK.G                                                                              |
| gi 57164942 r |                    | 11     | 27     | 8.00%   | 2032     | 225493 |   |        |      |   | 7.8 colonic and hepatic tumor over-expressed protein isoform a [Homo sapiens]                |
| gi 57222563 r |                    | 11     | 27     | 8.30%   | 1972     | 218524 |   |        |      |   | 8.1 colonic and hepatic tumor over-expressed protein isoform b [Homo sapiens]                |
|               | HsFlag-VPS71_Ti_10 | 3.692  | 0.1783 | 1806.8  | 1807.103 | 7377.9 | 4 | 666.9  | 53.3 | 8 | R.DALRPPLQNINSVQLK.E                                                                         |
|               | HsFLAG-FLJ20729_   | 4.375  | 0.3544 | 1660.52 | 1659.926 | 6559   | 1 | 1551.7 | 75   | 3 | K.FGQYAGHVVTILEK.F                                                                           |
|               | HsFlag-VPS71_Ti_10 | 3.2304 | 0.23   | 1412.85 | 1412.589 | 4712   | 1 | 598.4  | 60   | 1 | K.KGKPAAPGGAGNTGTK.N                                                                         |
|               | HsFlag-DPCD_Ti_20  | 2.7074 | 0.1818 | 1803.1  | 1803.967 | 8875.6 | 4 | 535.8  | 46.4 | 1 | K.EIVEPELSIEVCEEK.A                                                                          |
|               | HsFlag-NUFIP_Ti_20 | 3.4111 | 0.219  | 1541.41 | 1541.831 | 4099.6 | 7 | 467.8  | 61.5 | 3 | K.FIQPNIGELPTALK.G                                                                           |
|               | HsFLAG-ARP6_Ti_2   | 3.2115 | 0.2182 | 1440.97 | 1440.723 | 2704.7 | 4 | 462.4  | 69.2 | 3 | K.NLGPIITVLGDSK.N                                                                            |
|               | HsFlag-DPCD_Ti_20  | 2.8165 | 0.334  | 1734.62 | 1733.98  | 8421.7 | 1 | 483.8  | 46.9 | 1 | R.AAALATVNAWAEQTMK.E                                                                         |
|               | HsFLAG-FLJ20729_   | 3.191  | 0.2324 | 1401.34 | 1401.598 | 3818.4 | 1 | 396.4  | 62.5 | 2 | R.SMSGHPEAAQMVR.R                                                                            |
|               | HsFLAG-ARP6_Ti_2   | 3.8378 | 0.3604 | 1625.43 | 1625.902 | 5859.9 | 1 | 1189.3 | 73.1 | 2 | K.LDDIFEPVLIPEPK.I                                                                           |
|               | HsARP6-FLAG_Ti_1   | 2.5007 | 0.1207 | 1484.4  | 1484.693 | 5665   | 1 | 624.3  | 66.7 | 1 | R.LLPDTINSINLDR.I                                                                            |

|             |                    |        |        |         |          |        |   |        |      |   |                                                                                             |
|-------------|--------------------|--------|--------|---------|----------|--------|---|--------|------|---|---------------------------------------------------------------------------------------------|
|             | HsFlag-DPCD_Ti_20  | 3.4939 | 0.3164 | 1641.48 | 1641.88  | 7104.1 | 1 | 903.3  | 60   | 2 | K.PAVPTVASSTDMLHSK.L                                                                        |
| gi 40786394 | r                  | 1      | 2      | 8.00%   | 314      | 34613  |   |        |      |   | 7.8 hypothetical protein DKFZp434N062 [Homo sapiens]                                        |
| gi 88956612 | r                  | 1      | 2      | 8.10%   | 307      | 33797  |   |        |      |   | 7.2 PREDICTED: similar to fumarylacetoacetate hydrolase domain containing 2A [Homo sapiens] |
|             | HsFLAG-ARP8_Ti_2   | 3.149  | 0.3619 | 2752.59 | 2751.241 | 7711.1 | 1 | 754.5  | 39.6 | 2 | R.ALAAQLPVLWPSEVTFAPVTWPK.V                                                                 |
| gi 33239451 | r                  | 1      | 2      | 8.00%   | 261      | 28769  |   |        |      |   | 4.7 proliferating cell nuclear antigen [Homo sapiens]                                       |
| gi 4505641  | re                 | 1      | 2      | 8.00%   | 261      | 28769  |   |        |      |   | 4.7 proliferating cell nuclear antigen [Homo sapiens]                                       |
|             | HsFlag-VPS71_Ti_10 | 3.2679 | 0.221  | 2465.76 | 2466.772 | 7420.2 | 1 | 535.8  | 40   | 2 | K.LMDLDVEQLGIPEQEYSCVVK.M                                                                   |
| gi 5032013  | re                 | 3      | 4      | 7.90%   | 890      | 100278 |   |        |      |   | 6.9 kinesin family member 20A [Homo sapiens]                                                |
| *           | HsFLAG-ARP6_Ti_10  | 3.3583 | 0.1984 | 2465.49 | 2465.811 | 9723.9 | 1 | 597.2  | 38.1 | 1 | R.FTFSQIFGPEVQGASFFNLTVK.E                                                                  |
| *           | HsFLAG-ARP6_Ti_10  | 4.5307 | 0.3545 | 3686.7  | 3689.29  | 8219.1 | 1 | 636.6  | 22.7 | 1 | R.SLALIFNSLQQLHPTDLKPLLSNEVIWLDK.Q                                                          |
| *           | HsFLAG-ARP6_Ti_10  | 4.2899 | 0.3533 | 1691.33 | 1691.757 | 7673.5 | 1 | 1249.3 | 67.9 | 2 | K.NQSFASHTLNQNSSR.S                                                                         |
| gi 7657671  | re                 | 5      | 8      | 7.90%   | 764      | 89406  |   |        |      |   | 5.8 upstream binding transcription factor, RNA polymerase I [Homo sapiens]                  |
| *           | HsFLAG-p53-DNA-D   | 3.6291 | 0.3756 | 1583.46 | 1583.744 | 7031.8 | 1 | 1494.6 | 79.2 | 2 | R.FREDHPDLIQNAK.K                                                                           |
| *           | HsFlag-VPS71_Ti_10 | 3.2213 | 0.2794 | 1432.03 | 1431.591 | 6363.5 | 1 | 915.7  | 75   | 1 | K.TPQQLWYTHEK.K                                                                             |
| *           | HsFLAG-p53-DNA-D   | 2.9623 | 0.2535 | 2035.92 | 2035.267 | 6510.9 | 1 | 474.5  | 50   | 1 | K.RAEEIWQQSVIGDYLAR.F                                                                       |
| *           | HsFLAG-p53-DNA-D   | 4.4565 | 0.2715 | 1939.27 | 1940.207 | 6472   | 1 | 1222.4 | 62.5 | 3 | K.FSQELLSNGELNHLPLK.E                                                                       |
| *           | HsFLAG-p53-DNA-D   | 3.0079 | 0.2643 | 2224.5  | 2225.509 | 7402.7 | 1 | 445.8  | 38.9 | 1 | K.FSQELLSNGELNHLPLKER.M                                                                     |
| gi 19913424 | r                  | 3      | 6      | 7.90%   | 617      | 68304  |   |        |      |   | 5.5 ATPase, H+ transporting, lysosomal 70kD, V1 subunit A, isoform 1 [Homo sapiens]         |
| *           | HsFLAG-ARP6_Ti_10  | 4.8241 | 0.4804 | 1672.46 | 1672.943 | 5966.7 | 1 | 917.1  | 63.3 | 2 | K.RTALVANTSMPVAAR.E                                                                         |
| *           | HsFLAG-ARP6_Ti_10  | 3.8701 | 0.3668 | 2055.11 | 2056.318 | 8261.9 | 1 | 863.1  | 50   | 2 | K.EILQEEEDLAEIVQLVGK.A                                                                      |
| *           | HsFLAG-ARP6_Ti_10  | 5.0863 | 0.4348 | 1802.15 | 1801.968 | 7812.1 | 1 | 1631.2 | 71.4 | 2 | K.SDYAQLLEDMQNAFR.S                                                                         |
| gi 4758958  | re                 | 2      | 4      | 7.90%   | 404      | 45518  |   |        |      |   | 5.1 cAMP-dependent protein kinase, regulatory subunit alpha 2 [Homo sapiens]                |
| *           | HsFLAG-ARP6_Ti_10  | 5.2557 | 0.499  | 2037.87 | 2037.252 | 9515.9 | 1 | 2070.6 | 68.8 | 2 | K.NLDQEQLSQVLDAMFER.I                                                                       |
|             | HsFLAG-ARP6_Ti_10  | 3.3438 | 0.3219 | 1694.28 | 1693.943 | 6147   | 1 | 599.6  | 57.1 | 2 | K.GQYFGELALVTNKPR.A                                                                         |
| gi 25470886 | r                  | 2      | 10     | 7.90%   | 407      | 43383  |   |        |      |   | 8.6 DAZ associated protein 1 isoform b [Homo sapiens]                                       |
| gi 25470890 | r                  | 2      | 10     | 8.50%   | 378      | 40530  |   |        |      |   | 8.3 DAZ associated protein 1 isoform a [Homo sapiens]                                       |
|             | HsFLAG-Lin9_Ti_20  | 3.9307 | 0.3098 | 1825.17 | 1824.043 | 8167.1 | 1 | 1936.2 | 76.7 | 2 | K.LFVGGLDWSTTQETLR.S                                                                        |
|             | HsFLAG-p53-DNA-D   | 3.8601 | 0.317  | 1799.99 | 1799.99  | 4066.6 | 1 | 552.3  | 66.7 | 8 | K.IFVGIPHNCGETELR.E                                                                         |
| gi 25777600 | r                  | 3      | 5      | 7.80%   | 953      | 105836 |   |        |      |   | 5.4 proteasome 26S non-ATPase subunit 1 [Homo sapiens]                                      |
| *           | HsFlag-VPS71_Ti_10 | 3.5254 | 0.2417 | 3871.52 | 3873.271 | 8318.6 | 4 | 425.8  | 18.8 | 1 | K.DTSPGSAYQEGGGLYALGLIHANHGDDIIDLNLQK.L                                                     |
| *           | HsFlag-VPS71_Ti_10 | 5.8636 | 0.4002 | 2400.48 | 2400.617 | 9215.9 | 1 | 2534.3 | 46.2 | 3 | R.TPEQCPSVVSLLSESYNPHVR.Y                                                                   |
| *           | HsFLAG-ARP6_Ti_10  | 2.9039 | 0.2617 | 1789.43 | 1788.227 | 3812.5 | 1 | 461.4  | 60   | 1 | R.YQPFKPLSIGIILK.D                                                                          |
| gi 4758032  | re                 | 3      | 7      | 7.80%   | 906      | 102487 |   |        |      |   | 5.3 coatomer protein complex, subunit beta 2 (beta prime) [Homo sapiens]                    |
| *           | HsFlag-VPS71_Ti_10 | 4.6073 | 0.318  | 3825.77 | 3826.144 | 6119.7 | 1 | 782    | 26.5 | 1 | K.TCVQTLEGHAQNVSCASFHPELPIITGSEDGTVR.I                                                      |
| *           | HsFLAG-Lin9_Ti_20  | 3.4442 | 0.1925 | 1738.34 | 1736.919 | 6018.5 | 1 | 903    | 59.4 | 1 | R.GSNNVALGYDEGSIVK.L                                                                        |
| *           | HsFlag-VPS71_Ti_10 | 5.2319 | 0.412  | 2066.7  | 2066.272 | 4880.2 | 1 | 1148.1 | 63.9 | 5 | K.AESLADPTEYENLFPGLK.E                                                                      |
| gi 7705437  | re                 | 1      | 2      | 7.80%   | 180      | 20463  |   |        |      |   | 8.5 60S ribosome subunit biogenesis protein NIP7 homolog [Homo sapiens]                     |
| *           | HsFLAG-ARP6_Ti_10  | 4.8018 | 0.3394 | 1575.59 | 1575.848 | 7235.9 | 1 | 1729.6 | 76.9 | 2 | R.LHVTALDYLPYAK.Y                                                                           |
| gi 62865879 | r                  | 1      | 2      | 7.80%   | 180      | 19325  |   |        |      |   | 8.7 Bcl-2 inhibitor of transcription isoform a [Homo sapiens]                               |
| gi 7706351  | re                 | 1      | 2      | 7.80%   | 179      | 19194  |   |        |      |   | 8.7 Bcl-2 inhibitor of transcription isoform b [Homo sapiens]                               |
|             | HsFLAG-ARP6_Ti_10  | 3.8402 | 0.3346 | 1463.65 | 1463.599 | 8555   | 1 | 1226.4 | 69.2 | 2 | K.VAAQCShAAVSAYK.Q                                                                          |
| gi 4505185  | re                 | 1      | 2      | 7.80%   | 115      | 12476  |   |        |      |   | 7.9 macrophage migration inhibitory factor (glycosylation-inhibiting factor) [Homo sapiens] |
| *           | HsH2AZ-FLAG_293_   | 3.7463 | 0.2139 | 1046.24 | 1045.233 | 4522.5 | 1 | 963.7  | 93.8 | 2 | K.LLCGLLAER.L                                                                               |



|               |                    |        |        |         |          |                                                                                                                   |   |        |      |                                   |
|---------------|--------------------|--------|--------|---------|----------|-------------------------------------------------------------------------------------------------------------------|---|--------|------|-----------------------------------|
| gi 70980549 r | 10                 | 17     | 7.70%  | 1871    | 208699   | 8.9 programmed cell death 11 [Homo sapiens]                                                                       |   |        |      |                                   |
| *             | HsFLAG-Lin9_Ti_20  | 4.5433 | 0.3712 | 1526.46 | 1526.73  | 5430.9                                                                                                            | 1 | 844.5  | 67.9 | 1 R.KPALVSTVEGGQDPK.N             |
| *             | HsFLAG-FLJ20729_   | 3.8503 | 0.3078 | 1802.68 | 1803.172 | 5129.3                                                                                                            | 1 | 733.8  | 63.3 | 1 K.NFSEIHPGMLLIGFVK.S            |
| *             | HsFLAG-FLJ20729_   | 4.1781 | 0.3793 | 1896.43 | 1897.181 | 6211                                                                                                              | 1 | 1287.4 | 64.7 | 1 K.DYGVFIQFPSGLSGLAPK.A          |
| *             | HsFLAG-FLJ20729_   | 4.4826 | 0.3798 | 1476.17 | 1476.632 | 9361.6                                                                                                            | 1 | 1871.1 | 79.2 | 2 K.GSEHQAIQHQHLEK.S              |
| *             | HsFLAG-Lin9_Ti_20  | 4.7765 | 0.3415 | 1824.48 | 1825.112 | 8809.4                                                                                                            | 1 | 2112.5 | 66.7 | 2 K.TTEPGVTGLLLAVEGPAAK.R         |
| *             | HsFLAG-p53-DNA-D   | 3.2174 | 0.0989 | 1233.19 | 1232.549 | 6327.7                                                                                                            | 3 | 1338.7 | 85   | 1 R.IPLLLTSLSFK.V                 |
| *             | HsFLAG-Lin9_Ti_20  | 3.3603 | 0.3352 | 1564.16 | 1564.787 | 5429.7                                                                                                            | 1 | 647    | 65.4 | 1 R.GYVGSIQPHGVFFR.L              |
| *             | HsFLAG-Lin9_Ti_20  | 2.7123 | 0.2384 | 2929.3  | 2930.325 | 8284.4                                                                                                            | 4 | 214.7  | 24.1 | 1 K.NLVLSFLPGDTGKPDVLSASLEGQLTK.Q |
| *             | HsFLAG-Lin9_Ti_20  | 5.3769 | 0.3097 | 2930.27 | 2930.325 | 6111.6                                                                                                            | 1 | 736.6  | 29.6 | 3 K.NLVLSFLPGDTGKPDVLSASLEGQLTK.Q |
| *             | HsFLAG-p53-DNA-D   | 3.6039 | 0.3391 | 1290.43 | 1290.548 | 7496.7                                                                                                            | 1 | 2187.1 | 90   | 4 K.VFLHLADIYAK.S                 |
| gi 4826806 re | 4                  | 7      | 7.70%  | 801     | 88061    | 9.1 bromodomain containing protein 2 [Homo sapiens]                                                               |   |        |      |                                   |
| *             | HsFlag-NUFIP_Ti_20 | 4.5353 | 0.4318 | 1888.64 | 1890.147 | 10041.3                                                                                                           | 1 | 928.9  | 50   | 2 K.LPGEAGNAGLLGLGPEAAAPGK.R      |
| *             | HsFLAG-Lin9_Ti_20  | 3.2822 | 0.1463 | 1254.16 | 1254.433 | 6148.2                                                                                                            | 1 | 1259   | 88.9 | 1 K.HAAYAWPFYK.P                  |
| *             | HsFLAG-FLJ20729_   | 5.4778 | 0.5032 | 1874.45 | 1875.178 | 9842.5                                                                                                            | 1 | 2230.4 | 70.6 | 2 R.AVHEQLAALSQGPISKPK.R          |
| *             | HsFLAG-FLJ20729_   | 3.648  | 0.3053 | 1447.14 | 1446.604 | 7584.8                                                                                                            | 1 | 841.9  | 62.5 | 2 K.RLQDVSGQLNSTK.K               |
| gi 20149709 r | 3                  | 4      | 7.70%  | 542     | 60083    | 7.7 heterogeneous nuclear ribonucleoprotein L-like [Homo sapiens]                                                 |   |        |      |                                   |
| *             | HsFLAG-Lin9_Ti_20  | 3.2991 | 0.3107 | 1079.16 | 1079.288 | 5067.7                                                                                                            | 1 | 845    | 88.9 | 1 K.VSVSPVVHVR.G                  |
| *             | HsFLAG-p53-DNA-D   | 4.4453 | 0.3883 | 1703.69 | 1703.898 | 8003                                                                                                              | 1 | 1713.5 | 73.3 | 2 R.HDGYGSHGPLLPLPSR.Y            |
| *             | HsFLAG-Lin9_Ti_20  | 4.3785 | 0.3437 | 1815.7  | 1816.024 | 8323.3                                                                                                            | 1 | 1727.1 | 70   | 1 K.TDAVEALTALNHYQIR.V            |
| gi 88953744 r | 2                  | 5      | 7.70%  | 429     | 50740    | 8.7 PREDICTED: formin binding protein 3 isoform 1 [Homo sapiens]                                                  |   |        |      |                                   |
| gi 88957856 r | 2                  | 5      | 8.30%  | 398     | 47130    | 9.2 PREDICTED: similar to Formin-binding protein 3 (Huntingtin yeast partner A) (Huntingtin-interacting protein H |   |        |      |                                   |
| gi 88957853 r | 2                  | 5      | 7.70%  | 429     | 50740    | 8.7 PREDICTED: similar to Formin-binding protein 3 (Huntingtin yeast partner A) (Huntingtin-interacting protein H |   |        |      |                                   |
| gi 88953746 r | 2                  | 5      | 8.30%  | 398     | 47130    | 9.2 PREDICTED: formin binding protein 3 isoform 2 [Homo sapiens]                                                  |   |        |      |                                   |
|               | HsFLAG-p53-DNA-D   | 4.0407 | 0.3935 | 1840.63 | 1841.132 | 4263.6                                                                                                            | 1 | 677.6  | 65.6 | 3 R.FTNMLGQPGSTALDLFK.F           |
|               | HsFLAG-p53-DNA-D   | 2.7692 | 0.1889 | 1823.91 | 1824.043 | 6168.9                                                                                                            | 1 | 353.8  | 50   | 2 K.QAAPPIELDAVWEDIR.E            |
| gi 56699409 r | 3                  | 5      | 7.70%  | 391     | 42332    | 10.1 RNA binding motif protein, X-linked [Homo sapiens]                                                           |   |        |      |                                   |
|               | HsARP6-FLAG_Ti_1   | 2.9816 | 0.0993 | 1488.09 | 1487.652 | 8463.9                                                                                                            | 2 | 822.3  | 57.7 | 1 R.GFAFVTFESPADAK.D              |
|               | HsFLAG-p53-DNA-D   | 4.5817 | 0.3147 | 1748.62 | 1748.977 | 6133.7                                                                                                            | 1 | 1134   | 66.7 | 2 K.AIKVEQATKPSFESGR.R            |
|               | HsFlag-DPCD_Ti_20  | 3.4139 | 0.2866 | 1435.23 | 1436.564 | 4755.1                                                                                                            | 1 | 530.5  | 62.5 | 2 K.VEQATKPSFESGR.R               |
| gi 4885079 re | 2                  | 3      | 7.70%  | 297     | 32881    | 9.3 ATP synthase, H+ transporting, mitochondrial F1 complex, gamma subunit isoform H (heart) precursor [Homo      |   |        |      |                                   |
| gi 50345988 r | 2                  | 3      | 7.70%  | 298     | 32996    | 9.2 ATP synthase, H+ transporting, mitochondrial F1 complex, gamma subunit isoform L (liver) precursor [Homo s    |   |        |      |                                   |
|               | HsFLAG-ARP6_Ti_1   | 3.2372 | 0.263  | 1214.08 | 1214.373 | 6501.4                                                                                                            | 1 | 1437.9 | 81.8 | 2 R.GLCGAIHSSIAK.Q                |
|               | HsFLAG-ARP6_Ti_1   | 2.7915 | 0.2886 | 1294.48 | 1293.465 | 5235                                                                                                              | 1 | 515.5  | 70   | 1 R.THSDQFLVAFK.E                 |
| gi 27597059 r | 1                  | 2      | 7.70%  | 260     | 29910    | 5.7 DnaJ homolog, subfamily C, member 9 [Homo sapiens]                                                            |   |        |      |                                   |
| *             | HsFLAG-ARP6_Ti_1   | 3.502  | 0.3499 | 2177.7  | 2178.45  | 5840.3                                                                                                            | 1 | 720.2  | 50   | 2 R.NIIQQAIDAGEVPSYNAFVK.E        |
| gi 19920317 r | 3                  | 5      | 7.60%  | 602     | 66023    | 5.9 cytoskeleton-associated protein 4 [Homo sapiens]                                                              |   |        |      |                                   |
| *             | HsFLAG-ARP6_Ti_1   | 3.4425 | 0.442  | 1797.48 | 1798.049 | 7388.5                                                                                                            | 1 | 820    | 56.7 | 2 K.VQSLQATFGTFESILR.S            |
| *             | HsFLAG-ARP6_Ti_1   | 2.8736 | 0.347  | 1773.64 | 1773.953 | 8877.3                                                                                                            | 1 | 1183.7 | 64.3 | 1 R.STLQTMESDIYTEVR.E             |
| *             | HsFLAG-ARP6_Ti_1   | 4.3037 | 0.3128 | 1630.76 | 1630.839 | 8260.5                                                                                                            | 1 | 1469   | 67.9 | 2 K.RSVGELPSTVESLQK.V             |
| gi 51092299 r | 1                  | 2      | 7.60%  | 223     | 25268    | 8.4 adenylate kinase 3-like 2 [Homo sapiens]                                                                      |   |        |      |                                   |
| gi 89035941 r | 1                  | 2      | 7.60%  | 223     | 25240    | 8.4 PREDICTED: similar to Adenylate kinase isoenzyme 4, mitochondrial (ATP-AMP transphosphorylase) [Homo          |   |        |      |                                   |
| gi 89035461 r | 1                  | 2      | 7.60%  | 223     | 25208    | 8.4 PREDICTED: similar to Adenylate kinase isoenzyme 4, mitochondrial (ATP-AMP transphosphorylase) [Homo          |   |        |      |                                   |

|                      |        |        |         |          |         |     |                                                                                                               |
|----------------------|--------|--------|---------|----------|---------|-----|---------------------------------------------------------------------------------------------------------------|
| gi 8051579 re        | 1      | 2      | 7.60%   | 223      | 25268   | 8.4 | adenylate kinase 3-like 1 [Homo sapiens]                                                                      |
| gi 53832003 r        | 1      | 2      | 7.60%   | 223      | 25268   | 8.4 | adenylate kinase 3-like 1 [Homo sapiens]                                                                      |
| gi 53832001 r        | 1      | 2      | 7.60%   | 223      | 25268   | 8.4 | adenylate kinase 3-like 1 [Homo sapiens]                                                                      |
| HsFLAG-FLJ20729_     | 2.8991 | 0.0939 | 1928.78 | 1926.188 | 8260.4  | 1   | 669 50 2 R.IAQNFGQLHLSSGHFLR.E                                                                                |
| gi 4507669 re        | 1      | 3      | 7.60%   | 172      | 19595   | 4.9 | tumor protein, translationally-controlled 1 [Homo sapiens]                                                    |
| gi 89030551 r        | 1      | 3      | 9.40%   | 138      | 15483   | 5.1 | PREDICTED: similar to Translationally-controlled tumor protein (TCTP) (p23) (Histamine-releasing factor) (HR) |
| gi 89029983 r        | 1      | 3      | 9.40%   | 138      | 15492   | 5.2 | PREDICTED: similar to Translationally-controlled tumor protein (TCTP) (p23) (Histamine-releasing factor) (HR) |
| gi 46409468 r        | 1      | 3      | 9.30%   | 140      | 15757   | 6.2 | hypothetical protein LOC392490 [Homo sapiens]                                                                 |
| HsFLAG-p53-DNA-D     | 2.9403 | 0.1099 | 1420.61 | 1420.71  | 3955.3  | 4   | 530.5 70.8 3 R.VKPFMTGAAEQIK.H                                                                                |
| gi 50582540 r        | 6      | 11     | 7.50%   | 1285     | 148698  | 8.5 | myosin VI [Homo sapiens]                                                                                      |
| * HsFLAG-ARP6_Ti_1   | 2.8678 | 0.2539 | 1922.33 | 1923.173 | 7226.5  | 2   | 685.8 46.9 1 K.TFLALINQVFPAAEDSK.K                                                                            |
| * HsFLAG-ARP6_Ti_1   | 3.4197 | 0.285  | 1608.98 | 1609.869 | 7448.3  | 1   | 786.4 57.1 2 K.SLGTRPPHVFAIADK.A                                                                              |
| * HsFLAG-ARP6_Ti_1   | 3.7595 | 0.3401 | 1622.52 | 1622.861 | 8082.6  | 1   | 1190.1 60.7 3 K.SSVVGGFVSHYLLEK.S                                                                             |
| * HsFLAG-ARP6_Ti_1   | 4.1266 | 0.3449 | 2645.07 | 2645.895 | 11865.9 | 1   | 1079.8 27 2 R.VVAGVLHLGNIDFEEAGSTSGGCNLK.N                                                                    |
| * HsFLAG-ARP6_Ti_1   | 2.9472 | 0.2436 | 1339.32 | 1339.538 | 6021.7  | 1   | 918.2 77.3 2 K.VPLKVEQANNAR.D                                                                                 |
| * HsFLAG-ARP6_Ti_1   | 2.6221 | 0.2689 | 1402.68 | 1403.595 | 8996.7  | 1   | 1203.9 70 1 R.ASFHELYNMYK.K                                                                                   |
| gi 21361794 r        | 6      | 11     | 7.50%   | 1230     | 136375  | 5.8 | TIP120 protein [Homo sapiens]                                                                                 |
| * HsFLAG-FLJ20729_   | 3.7294 | 0.2162 | 1484.76 | 1484.779 | 8891    | 1   | 1077.1 65.4 3 K.ISGSILNELIGLVR.S                                                                              |
| * HsFLAG-Lin9_Ti_20  | 2.7657 | 0.1991 | 1487.58 | 1487.696 | 6648.6  | 1   | 632.3 57.7 1 K.EGPAVVGGFIQDVK.N                                                                               |
| * HsFLAG-Lin9_Ti_20  | 5.0594 | 0.3537 | 3281.01 | 3281.73  | 8924.9  | 1   | 1096 29.2 2 K.SAASYALGSISVGNLPEYLPFVLQEITSQPK.R                                                               |
| * HsFLAG-p53-DNA-D   | 3.6234 | 0.1857 | 1938.9  | 1939.268 | 4321.3  | 1   | 691.9 39.7 1 R.VALVTFNSAAHNKPSLIR.D                                                                           |
| * HsFLAG-p53-DNA-D   | 4.8451 | 0.3916 | 1938.92 | 1939.268 | 10146.2 | 2   | 956.6 47.1 2 R.VALVTFNSAAHNKPSLIR.D                                                                           |
| * HsFLAG-FLJ20729_   | 3.907  | 0.3946 | 1772.29 | 1772.008 | 4592    | 1   | 690.1 60.7 2 R.DLLDTVLPPLYNETK.V                                                                              |
| gi 24307879 r        | 2      | 5      | 7.50%   | 638      | 71457   | 5.2 | dynein, cytoplasmic, intermediate polypeptide 2 [Homo sapiens]                                                |
| * HsFlag-VPS71_Ti_1  | 4.2965 | 0.4845 | 1951.5  | 1951.955 | 7129.7  | 1   | 890.1 52.5 4 K.SVSTPSEAGSQDSGDGAVGSR.T                                                                        |
| * HsFLAG-FLJ20729_   | 4.1953 | 0.3108 | 2953.26 | 2954.223 | 8328.4  | 4   | 608.2 25 1 R.LDLWNLNNDTEVPTASISVEGNPALNR.V                                                                    |
| gi 4508017 re        | 2      | 4      | 7.50%   | 478      | 50751   | 9.1 | zinc finger protein 207 isoform a [Homo sapiens]                                                              |
| gi 73808090 r        | 2      | 4      | 7.80%   | 463      | 49692   | 9.1 | zinc finger protein 207 isoform b [Homo sapiens]                                                              |
| HsFLAG-FLJ20729_     | 3.0502 | 0.315  | 1825.49 | 1826.133 | 11206.2 | 1   | 950.6 50 1 K.LYTGPLAIHCMQVHK.E                                                                                |
| HsFlag-VPS71_Ti_1    | 4.8467 | 0.4017 | 1935.68 | 1935.182 | 3467.2  | 1   | 942.9 68.4 3 K.PAASITSKPATLTTTSATSK.L                                                                         |
| gi 19923748 r        | 2      | 6      | 7.50%   | 453      | 48755   | 9   | dihydrolipoamide S-succinyltransferase (E2 component of 2-oxo-glutarate complex) [Homo sapiens]               |
| * HsFLAG-p53-DNA-D   | 2.777  | 0.1899 | 1192.71 | 1193.389 | 4280    | 4   | 605.1 66.7 2 K.AKPAEAPAAAAPK.A                                                                                |
| * HsFLAG-p53-DNA-D   | 5.5798 | 0.4439 | 2217.2  | 2218.469 | 6115.3  | 1   | 1036.6 55 4 K.ASAFALQEQPVVNAVIDDTTK.E                                                                         |
| gi 45505149 r        | 1      | 2      | 7.50%   | 428      | 47629   | 8.2 | nuclear factor I/C isoform 1 [Homo sapiens]                                                                   |
| gi 45505151 r        | 1      | 2      | 6.40%   | 499      | 54682   | 8.5 | nuclear factor I/C isoform 2 [Homo sapiens]                                                                   |
| HsFlag-VPS71_Ti_1    | 4.0132 | 0.3735 | 3284.14 | 3284.653 | 5353.9  | 1   | 471.8 23.4 2 R.TPVVTGTGPNFSLGELQGHLAYDLNPASTGLR.R                                                             |
| gi 4505775 re        | 2      | 13     | 7.50%   | 361      | 39959   | 9.4 | solute carrier family 25 member 3 isoform b precursor [Homo sapiens]                                          |
| gi 47132595 r        | 2      | 13     | 7.50%   | 361      | 39959   | 9.4 | solute carrier family 25 member 3 isoform b precursor [Homo sapiens]                                          |
| HsSrcap_Ti_205.423   | 3.353  | 0.4894 | 2910.89 | 2912.331 | 10420.5 | 1   | 865.4 36.5 1 K.YYALCGFGGVLSCGLTHTAVVPLDLVK.C                                                                  |
| HsSrcap_Ti_205.422   | 6.3471 | 0.5698 | 2911.66 | 2912.331 | 7982.4  | 1   | 1477.9 33.7 12 K.YYALCGFGGVLSCGLTHTAVVPLDLVK.C                                                                |
| gi 6006001 re        | 1      | 2      | 7.50%   | 226      | 25402   | 8.1 | plasma glutathione peroxidase 3 precursor [Homo sapiens]                                                      |
| * HsSrcap_Ti_206.277 | 4.1573 | 0.288  | 1956.72 | 1956.254 | 7633.6  | 1   | 786.8 56.2 2 K.YVRPGGGFVPNFQLFEK.G                                                                            |
| gi 8923579 re        | 1      | 3      | 7.50%   | 161      | 17745   | 5.1 | hypothetical protein LOC55004 [Homo sapiens]                                                                  |

|             |                    |        |        |         |          |        |   |        |      |   |                                                                                  |
|-------------|--------------------|--------|--------|---------|----------|--------|---|--------|------|---|----------------------------------------------------------------------------------|
| *           | HsFLAG-ARP6_Ti_1   | 3.5945 | 0.3206 | 1342.45 | 1342.581 | 5979.3 | 1 | 1382.6 | 81.8 | 3 | R.LAVLSSSLTHWK.K                                                                 |
| gi 23510338 | r                  | 4      | 8      | 7.40%   | 1058     | 117849 |   |        |      |   | 5.8 ubiquitin-activating enzyme E1 [Homo sapiens]                                |
| gi 23510340 | r                  | 4      | 8      | 7.40%   | 1058     | 117849 |   |        |      |   | 5.8 ubiquitin-activating enzyme E1 [Homo sapiens]                                |
|             | HsFlag-VPS71_Ti_1  | 5.4438 | 0.3325 | 2602.57 | 2601.745 | 8473.5 | 1 | 1917.1 | 56.8 | 3 | R.IYDDDFQNLGDGVANALDNVDAR.M                                                      |
|             | HsFLAG-ARP6_Ti_1   | 3.1642 | 0.2518 | 1243.91 | 1244.474 | 5445.1 | 1 | 700.6  | 72.7 | 2 | R.KPLLESGLTK.G                                                                   |
|             | HsFLAG-ARP6_Ti_1   | 2.5565 | 0.1102 | 2317.22 | 2317.781 | 9129.5 | 3 | 403.6  | 33.3 | 1 | K.IIPAIATTTAAVVLVLCLELYK.V                                                       |
|             | HsFLAG-p53-DNA-D   | 2.756  | 0.1668 | 2278.72 | 2279.646 | 5250.4 | 2 | 273.4  | 35   | 2 | K.NGFLNLALPFFGFSEPLAAPR.H                                                        |
| gi 18860916 | r                  | 5      | 8      | 7.40%   | 950      | 108583 |   |        |      |   | 7.5 5'-3' exoribonuclease 2 [Homo sapiens]                                       |
| *           | HsFLAG-FLJ20729_   | 5.2167 | 0.2983 | 2122.03 | 2122.392 | 6745.8 | 1 | 1079.5 | 40.8 | 1 | K.RDQPAFTPSGILTPHALGSR.N                                                         |
| *           | HsFlag-NUFIP_Ti_1  | 4.6737 | 0.4589 | 1965.66 | 1966.204 | 4820.7 | 1 | 669.4  | 58.3 | 4 | R.DQPAFTPSGILTPHALGSR.N                                                          |
| *           | HsFLAG-ARP6_Ti_1   | 2.732  | 0.1212 | 1763.88 | 1765.021 | 6416.2 | 1 | 770.4  | 57.1 | 1 | K.YAWQGVALLPFVDER.R                                                              |
| *           | HsFlag-VPS71_Ti_1  | 3.3393 | 0.2068 | 2530.45 | 2530.905 | 4017.8 | 1 | 484    | 47.6 | 1 | K.FSLDEEAILPDQIVCSPVPMR.D                                                        |
| *           | HsFLAG-Lin9_Ti_20  | 3.0392 | 0.2897 | 1470.04 | 1469.724 | 6351.1 | 1 | 752.9  | 70.8 | 1 | R.KPAAVLKPSDWEK.S                                                                |
| gi 45333883 | r                  | 4      | 4      | 7.40%   | 674      | 76138  |   |        |      |   | 6.1 kelch repeat and BTB (POZ) domain-containing 6 [Homo sapiens]                |
|             | HsFlag-FLJ90652_2  | 3.7114 | 0.1904 | 1339.65 | 1339.534 | 6758.8 | 1 | 1439.5 | 79.2 | 1 | K.DTAHSAALLAQLK.S                                                                |
| *           | HsFlag-FLJ90652_2  | 2.6272 | 0.1955 | 921.09  | 921.003  | 5987.7 | 1 | 992.2  | 85.7 | 1 | K.FADAFGHR.K                                                                     |
|             | HsFlag-FLJ90652_2  | 3.0677 | 0.2614 | 1869.66 | 1870.197 | 7970.7 | 1 | 820    | 56.2 | 1 | R.EETLADLTLAQLLAVLR.L                                                            |
| *           | HsFlag-FLJ90652_2  | 2.9014 | 0.2614 | 1353.27 | 1352.543 | 7470.6 | 1 | 888.2  | 72.7 | 1 | K.VPSPLTCLAHR.T                                                                  |
| gi 35493916 | r                  | 3      | 7      | 7.40%   | 631      | 69284  |   |        |      |   | 5.7 ribophorin II precursor [Homo sapiens]                                       |
| *           | HsFLAG-ARP6_Ti_1   | 4.3961 | 0.2174 | 1373.33 | 1373.546 | 8923.6 | 1 | 2087   | 86.4 | 2 | R.SIVEEIEDLVAR.L                                                                 |
| *           | HsFLAG-ARP6_Ti_1   | 4.3202 | 0.4194 | 1840.52 | 1841.158 | 5329   | 1 | 1096.3 | 65.6 | 2 | R.LQVTNVLSQPLTQATVK.L                                                            |
| *           | HsFLAG-ARP6_Ti_1   | 4.3688 | 0.4851 | 2045.92 | 2046.345 | 6110.5 | 1 | 1282.8 | 61.8 | 3 | K.TSFTPVGDVLFELNFMNVK.F                                                          |
| gi 5031815  | re                 | 2      | 2      | 7.40%   | 597      | 68048  |   |        |      |   | 6.4 lysyl-tRNA synthetase [Homo sapiens]                                         |
| *           | HsFlag-FLJ90652_2  | 3.0093 | 0.2195 | 1838.43 | 1839.058 | 5694.4 | 2 | 599.9  | 56.7 | 1 | K.YSHLQPGDHLTDITLK.V                                                             |
| *           | HsFlag-VPS71_Ti_1  | 3.7789 | 0.2024 | 3232.83 | 3231.707 | 5958.1 | 1 | 856.8  | 27.8 | 1 | K.LVGEFLEVTCINPTFCIDHPQIMSPLAK.W                                                 |
| gi 38569466 | r                  | 2      | 2      | 7.40%   | 552      | 59690  |   |        |      |   | 9 ROD1 regulator of differentiation 1 [Homo sapiens]                             |
| *           | HsFLAG-FLJ20729_   | 3.9819 | 0.3224 | 2517.29 | 2518.014 | 5576.9 | 1 | 628.1  | 36.2 | 1 | R.IIIENLFYPVTLEVLHQIFSK.F                                                        |
| *           | HsFLAG-Lin9_Ti_20  | 3.6136 | 0.2989 | 2306.68 | 2306.542 | 7768   | 1 | 471.3  | 42.1 | 1 | K.NNQFQALLQYADPVNAHYAK.M                                                         |
| gi 4503521  | re                 | 2      | 6      | 7.40%   | 445      | 52221  |   |        |      |   | 6 murine mammary tumor integration site 6 (oncogene homolog) [Homo sapiens]      |
| *           | HsFLAG-ARP6_Ti_1   | 3.4535 | 0.1741 | 1542.71 | 1542.905 | 4893.4 | 1 | 644.4  | 66.7 | 4 | R.HLVFPLLEFLSVK.E                                                                |
| *           | HsSrcap_Ti_205.209 | 5.4321 | 0.472  | 2183.85 | 2184.518 | 8999   | 1 | 2005.6 | 65.8 | 2 | K.LGHVVMGNNVSPYQQVIEK.T                                                          |
| gi 14719402 | r                  | 2      | 2      | 7.40%   | 365      | 41193  |   |        |      |   | 10.7 homolog of yeast ribosome biogenesis regulatory protein RRS1 [Homo sapiens] |
| *           | HsFLAG-ARP6_Ti_1   | 5.3066 | 0.452  | 2171.8  | 2172.399 | 3677.5 | 1 | 610.3  | 61.1 | 1 | K.EWLIEVPGNADPLEDQFAK.R                                                          |
| *           | HsFLAG-TCF3_Ti_1   | 2.0823 | 0.0995 | 956.3   | 957.118  | 3216.7 | 3 | 284.3  | 78.6 | 1 | K.KPQLDVTR.A                                                                     |
| gi 21536449 | r                  | 2      | 3      | 7.40%   | 122      | 14210  |   |        |      |   | 6.8 prefoldin 1 [Homo sapiens]                                                   |
| *           | HsFLAG-p53-DNA-D   | 2.6424 | 0.0939 | 1035.51 | 1036.216 | 5812.8 | 5 | 692.4  | 75   | 2 | K.KAFTELQAK.V                                                                    |
| *           | HsFLAG-p53-DNA-D   | 3.6705 | 0.1388 | 1036.39 | 1036.216 | 4591   | 1 | 1084.9 | 93.8 | 1 | K.KAFTELQAK.V                                                                    |
| gi 50428935 | r                  | 4      | 5      | 7.30%   | 1059     | 112211 |   |        |      |   | 7.3 BPY2 interacting protein 1 [Homo sapiens]                                    |
| *           | HsFLAG-Lin9_Ti_20  | 2.881  | 0.1648 | 2507.89 | 2507.887 | 9167.4 | 1 | 741.3  | 39.1 | 1 | R.GEDEAELALLAQLGITPLPLSR.G                                                       |
| *           | HsFLAG-Lin9_Ti_20  | 2.5014 | 0.2758 | 1986.71 | 1986.294 | 6036.3 | 8 | 259.5  | 41.2 | 1 | R.VLFPGCTPPACLLDGLVR.L                                                           |
| *           | HsFLAG-p53-DNA-D   | 3.9266 | 0.2772 | 1910.82 | 1911.168 | 9559.3 | 1 | 1043.8 | 59.4 | 1 | R.FLREPVVTPQDLEGPR.A                                                             |
| *           | HsFLAG-FLJ20729_   | 2.8745 | 0.2258 | 1639.76 | 1640.794 | 5747.7 | 1 | 607.2  | 52.9 | 2 | R.GPSGSASSRPGVSATPPK.S                                                           |
| gi 6912752  | re                 | 4      | 8      | 7.30%   | 895      | 96915  |   |        |      |   | 8.5 zinc finger protein 281 [Homo sapiens]                                       |

|                |                    |        |        |         |          |                                                                             |   |        |      |                                        |
|----------------|--------------------|--------|--------|---------|----------|-----------------------------------------------------------------------------|---|--------|------|----------------------------------------|
| *              | HsYL1_Ti_104.1359. | 3.1506 | 0.3146 | 1432.71 | 1431.591 | 7145.3                                                                      | 1 | 1040.4 | 69.2 | 1 K.KEPAASAAAFPSQR.T                   |
| *              | HsYL1_Ti_102.2774. | 2.5816 | 0.1577 | 1805.46 | 1805.084 | 3915.9                                                                      | 3 | 333.9  | 46.7 | 1 K.NYLNFSVPLPDIIVGQK.S                |
| *              | HsYL1_Ti_102.3314. | 4.1008 | 0.2755 | 2008.36 | 2007.205 | 6843.1                                                                      | 2 | 1018.1 | 58.8 | 4 K.SGIPDEVLQSIQSDQYSNK.S              |
| *              | HsH2AZ-FLAG_293_   | 2.9671 | 0.3432 | 1981    | 1981.172 | 10535.9                                                                     | 1 | 814.1  | 50   | 2 R.TTYQIENFAQAFGSQFK.S                |
| gij 56711248 r | 3                  | 4      | 7.30%  | 785     | 88802    | 6.5 hypothetical protein LOC23167 [Homo sapiens]                            |   |        |      |                                        |
| *              | HsFLAG-ARP6_Ti_1   | 4.3919 | 0.3547 | 2687.89 | 2687.889 | 4163.2                                                                      | 1 | 859    | 35.4 | 2 R.IGPPSSPSATDKEENPAVLAENCFR.E        |
| *              | HsFLAG-ARP6_Ti_1   | 4.8762 | 0.3571 | 1580.64 | 1580.952 | 10043.3                                                                     | 1 | 2256.4 | 70   | 1 R.AGIIQVLLLEAVIAIAAK.G               |
| *              | HsFLAG-ARP6_Ti_1   | 2.7761 | 0.227  | 1688.98 | 1689.005 | 4710.3                                                                      | 1 | 446.6  | 53.3 | 1 K.GSIGPTVLEVFNLLK.H                  |
| gij 4826882 re | 4                  | 7      | 7.30%  | 657     | 75627    | 5 nuclear matrix protein p84 [Homo sapiens]                                 |   |        |      |                                        |
| *              | HsFLAG-p53-DNA-D   | 4.6923 | 0.3119 | 2089.57 | 2089.353 | 6329.9                                                                      | 1 | 1138.6 | 61.1 | 2 K.NIKPLLSTFSQVPGSENEK.K              |
| *              | HsFLAG-Lin9_Ti_20  | 3.3637 | 0.4045 | 1733.41 | 1733.916 | 4116.5                                                                      | 1 | 662.9  | 63.3 | 1 K.PLLSTFSQVPGSENEK.K                 |
| *              | HsFLAG-Lin9_Ti_20  | 3.7433 | 0.2814 | 1705.66 | 1704.834 | 5392                                                                        | 1 | 712.8  | 60.7 | 3 K.SVYQLLENPPDGER.F                   |
| *              | HsFLAG-FLJ20729_   | 3.5827 | 0.3166 | 1762.55 | 1762.968 | 6578.5                                                                      | 1 | 782.6  | 65.4 | 1 R.RSPHFFQPTNQQFK.S                   |
| gij 10716563 r | 3                  | 5      | 7.30%  | 592     | 67568    | 4.6 calnexin precursor [Homo sapiens]                                       |   |        |      |                                        |
| gij 66933005 r | 3                  | 5      | 7.30%  | 592     | 67568    | 4.6 calnexin precursor [Homo sapiens]                                       |   |        |      |                                        |
|                | HsFlag-VPS71_Ti_1  | 2.9837 | 0.2912 | 1773.09 | 1771.924 | 5010.8                                                                      | 1 | 756.7  | 60   | 2 K.APVPTGEVYFADSFDR.G                 |
|                | HsFLAG-ARP6_Ti_1   | 4.1696 | 0.3261 | 1457.07 | 1457.583 | 7587                                                                        | 1 | 1149.8 | 72.7 | 2 K.TPELNLDQFHDK.T                     |
|                | HsFLAG-ARP6_Ti_1   | 2.8174 | 0.3169 | 1864.66 | 1865.095 | 5938.2                                                                      | 1 | 634.2  | 57.1 | 1 R.KIPNPDFFEDLEPFR.M                  |
| gij 15147335 r | 2                  | 4      | 7.30%  | 579     | 65536    | 9.6 nuclear receptor coactivator 5 [Homo sapiens]                           |   |        |      |                                        |
| *              | HsScrap_Ti_105.199 | 3.2314 | 0.3845 | 1777.48 | 1777.959 | 5164.2                                                                      | 1 | 838.8  | 64.3 | 3 R.SCTVNIMFGTPQEHR.N                  |
| *              | HsSrcap_Ti_204.195 | 3.1042 | 0.3836 | 2846.97 | 2848.16  | 10507                                                                       | 1 | 515    | 30.8 | 1 R.LAPASNMTSQRPVSSSTGINFDNPSVQK.A     |
| gij 21040255 r | 2                  | 5      | 7.30%  | 508     | 59380    | 10.4 splicing factor, arginine/serine-rich 12 [Homo sapiens]                |   |        |      |                                        |
| *              | HsFlag-VPS71_Ti_1  | 3.6534 | 0.3963 | 2490.56 | 2490.772 | 9352.1                                                                      | 1 | 674.8  | 40.5 | 3 R.TVYVGNLNSQTTTADQLLEFFK.Q           |
| *              | HsFLAG-p53-DNA-D   | 4.3172 | 0.3093 | 1637.43 | 1636.952 | 8778.3                                                                      | 1 | 1205.6 | 64.3 | 2 R.ALAFNGVMFGDRPLK.I                  |
| gij 4507903 re | 2                  | 3      | 7.30%  | 396     | 45476    | 8.9 vaccinia related kinase 1 [Homo sapiens]                                |   |        |      |                                        |
| *              | HsFLAG-Lin9_Ti_20  | 2.6627 | 0.0962 | 1547.8  | 1546.717 | 3420                                                                        | 5 | 340.1  | 61.5 | 1 K.VEPSDNGPLFTELK.F                   |
| *              | HsFLAG-FLJ20729_   | 4.2218 | 0.4204 | 1787.24 | 1786.982 | 7714.5                                                                      | 1 | 976.1  | 60.7 | 2 K.NPDQVYLVYGLAYR.Y                   |
| gij 22547114 r | 1                  | 4      | 7.30%  | 261     | 29283    | 9.6 mitochondrial ribosomal protein L10 isoform a [Homo sapiens]            |   |        |      |                                        |
| gij 22547125 r | 1                  | 4      | 7.00%  | 271     | 30307    | 9.2 mitochondrial ribosomal protein L10 isoform b [Homo sapiens]            |   |        |      |                                        |
|                | HsFLAG-ARP6_Ti_1   | 3.1963 | 0.3369 | 2089.22 | 2088.418 | 5159                                                                        | 1 | 483.8  | 50   | 4 R.TVPFLLGGCIDDITLSR.Q                |
| gij 34101286 r | 4                  | 8      | 7.20%  | 1074    | 117012   | 9 zinc finger RNA binding protein [Homo sapiens]                            |   |        |      |                                        |
| *              | HsFLAG-Lin9_Ti_20  | 5.6554 | 0.4395 | 3156.38 | 3156.438 | 10380.9                                                                     | 1 | 1441   | 29   | 1 R.PAPVAVAAAATAAAYGGYPTAHTATDYGYTQR.Q |
| *              | HsFLAG-p53-DNA-D   | 4.0165 | 0.3025 | 1601.48 | 1601.85  | 7887.5                                                                      | 1 | 1554.6 | 73.1 | 2 R.NVNLVLLCSEKPSK.T                   |
| *              | HsFLAG-p53-DNA-D   | 3.9452 | 0.3451 | 2135.76 | 2136.47  | 6160.7                                                                      | 1 | 712.9  | 52.9 | 4 R.VPTWSDFPWSWAMELLVEK.A              |
| *              | HsYL1_Ti_101.1715. | 2.986  | 0.1795 | 1327.58 | 1326.316 | 4090.3                                                                      | 1 | 719.9  | 70.8 | 1 R.DSDGVDGFEEAGK.K                    |
| gij 5031569 re | 2                  | 7      | 7.20%  | 376     | 42614    | 6.6 ARP1 actin-related protein 1 homolog A, centractin alpha [Homo sapiens] |   |        |      |                                        |
|                | HsFLAG-Lin9_Ti_20  | 3.0768 | 0.236  | 1401.09 | 1401.574 | 5265                                                                        | 1 | 506.3  | 65   | 1 K.YCFPNYVGRPK.H                      |
| *              | HsFLAG-p53-DNA-D   | 5.5537 | 0.4665 | 1684.66 | 1684.973 | 6760.4                                                                      | 1 | 1830.7 | 80   | 6 R.TLFSNIVLSGGSTLFLK.G                |
| gij 4506203 re | 1                  | 2      | 7.20%  | 277     | 29965    | 7.7 proteasome beta 7 subunit proprotein [Homo sapiens]                     |   |        |      |                                        |
| *              | HsFlag-VPS71_Ti_1  | 3.4504 | 0.392  | 2090.32 | 2088.441 | 7017.2                                                                      | 1 | 576.6  | 44.7 | 2 K.LPYVTMGSGSLAAMAVFEDK.F             |
| gij 4502171 re | 1                  | 2      | 7.20%  | 180     | 19608    | 6 adenine phosphoribosyltransferase isoform a [Homo sapiens]                |   |        |      |                                        |
| *              | HsH2AZ-FLAG_293_   | 2.8913 | 0.1389 | 1524.41 | 1524.8   | 3911.3                                                                      | 1 | 489.5  | 62.5 | 2 K.LAPVPFFSLLQYE.-                    |
| gij 89030031 r | 15                 | 98     | 7.10%  | 2229    | 242964   | 8.3 PREDICTED: hypothetical protein LOC84726 isoform 1 [Homo sapiens]       |   |        |      |                                        |

|               |                    |        |        |         |          |                                                                                             |   |        |      |    |                                          |
|---------------|--------------------|--------|--------|---------|----------|---------------------------------------------------------------------------------------------|---|--------|------|----|------------------------------------------|
| gi 89030655 r | 15                 | 98     | 7.10%  | 2229    | 242964   | 8.3 PREDICTED: similar to HLA-B associated transcript-2 isoform a isoform 15 [Homo sapiens] |   |        |      |    |                                          |
| gi 89030647 r | 15                 | 98     | 7.10%  | 2229    | 242964   | 8.3 PREDICTED: similar to HLA-B associated transcript-2 isoform a isoform 10 [Homo sapiens] |   |        |      |    |                                          |
| gi 89030045 r | 15                 | 98     | 7.10%  | 2229    | 242964   | 8.3 PREDICTED: hypothetical protein LOC84726 isoform 9 [Homo sapiens]                       |   |        |      |    |                                          |
| gi 89030039 r | 15                 | 98     | 7.10%  | 2229    | 242964   | 8.3 PREDICTED: hypothetical protein LOC84726 isoform 6 [Homo sapiens]                       |   |        |      |    |                                          |
|               | HsFLAG-KIAA0515_   | 2.391  | 0.2466 | 1073.61 | 1074.219 | 6657.1                                                                                      | 1 | 636.5  | 75   | 7  | K.YSTLSLFDK.Y                            |
|               | HsFLAG-KIAA0515_   | 3.0827 | 0.1453 | 840.29  | 839.97   | 3998.2                                                                                      | 1 | 991.8  | 100  | 1  | R.HGLQSLGK.V                             |
|               | HsFLAG-KIAA0515_   | 2.466  | 0.0825 | 1164.3  | 1165.436 | 5127.9                                                                                      | 9 | 530.4  | 65   | 2  | R.MPPPANLPSLK.S                          |
|               | HsFLAG-KIAA0515_   | 3.6077 | 0.1581 | 1168.37 | 1166.363 | 6498.3                                                                                      | 2 | 1325.2 | 85   | 1  | K.GNDPNIVIVPK.D                          |
|               | HsFLAG-KIAA0515_   | 3.3926 | 0.3814 | 2010.42 | 2011.196 | 3303.4                                                                                      | 1 | 372.1  | 50   | 4  | K.SSSATASQPPELPPGLQK.S                   |
|               | HsFLAG-KIAA0515_   | 4.3695 | 0.245  | 2598.44 | 2598.83  | 4752.8                                                                                      | 1 | 785    | 47.9 | 7  | K.SVSNLQKPTQSSISQENTNSVPGGPK.S           |
|               | HsFLAG-KIAA0515_   | 5.3966 | 0.2823 | 2598.52 | 2598.83  | 6457.6                                                                                      | 1 | 1407.9 | 38.5 | 2  | K.SVSNLQKPTQSSISQENTNSVPGGPK.S           |
|               | HsFLAG-KIAA0515_   | 4.8296 | 0.3679 | 1841.54 | 1841.973 | 5817.7                                                                                      | 1 | 1305.1 | 67.6 | 4  | K.PTQSSISQENTNSVPGGPK.S                  |
|               | HsFLAG-KIAA0515_   | 4.3862 | 0.2627 | 1843.34 | 1841.973 | 7585.6                                                                                      | 2 | 1078   | 41.2 | 1  | K.PTQSSISQENTNSVPGGPK.S                  |
|               | HsFLAG-KIAA0515_   | 2.4348 | 0.0813 | 903.46  | 904.013  | 4020.5                                                                                      | 8 | 315.1  | 71.4 | 1  | K.SWAQLNGK.P                             |
|               | HsFLAG-KIAA0515_   | 3.2516 | 0.2889 | 1896.38 | 1896.15  | 4673.3                                                                                      | 1 | 582.9  | 56.2 | 1  | R.GSSRLLSFSPEEFPTLK.A                    |
|               | HsFLAG-KIAA0515_   | 3.7032 | 0.0989 | 1509.55 | 1508.755 | 4468.6                                                                                      | 1 | 796.7  | 70.8 | 9  | R.LLSFSPEEFPTLK.A                        |
|               | HsFLAG-KIAA0515_   | 2.9535 | 0.2142 | 1431.48 | 1431.632 | 4961                                                                                        | 1 | 663.7  | 61.5 | 1  | K.GVLDLSYGGPGLR.P                        |
|               | HsFLAG-KIAA0515_   | 5.6894 | 0.4755 | 1857.7  | 1858.059 | 7413.6                                                                                      | 1 | 2156.5 | 76.5 | 56 | R.HIISATSLSTSPTELGSR.N                   |
|               | HsFLAG-KIAA0515_   | 2.7436 | 0.2778 | 1729.02 | 1729.675 | 3017.7                                                                                      | 1 | 377.2  | 55.9 | 1  | R.NSSTGDGAPSSACTSDSK.D                   |
| gi 14211540 r | 4                  | 6      | 7.10%  | 1003    | 113671   | 8.8 Mov10, Moloney leukemia virus 10, homolog [Homo sapiens]                                |   |        |      |    |                                          |
| *             | HsFLAG-ARP6_Ti_1   | 2.5105 | 0.1581 | 1901.57 | 1902.127 | 9034                                                                                        | 2 | 599.1  | 40.6 | 1  | R.NGGTQSVTLTHLFLPCR.T                    |
| *             | HsFlag-NUFIP_Ti_11 | 4.5612 | 0.3232 | 1537.63 | 1537.845 | 6362.5                                                                                      | 1 | 1966.4 | 85.7 | 2  | R.FLAAVAHSPLAQLK.P                       |
| *             | HsFlag-NUFIP_Ti_10 | 3.0118 | 0.1567 | 1966.46 | 1967.316 | 7917.4                                                                                      | 1 | 481.5  | 44.1 | 1  | R.LLTLEVPGVTESRPSVLR.G                   |
| *             | HsFLAG-ARP6_Ti_1   | 3.6191 | 0.228  | 2289.61 | 2289.46  | 5879.5                                                                                      | 1 | 532.5  | 45   | 2  | R.EGNSPSFFNPEEAATVTSYLK.L                |
| gi 7705433 re | 3                  | 3      | 7.10%  | 564     | 66727    | 6.3 eukaryotic translation initiation factor 3 subunit 6 interacting protein [Homo sapiens] |   |        |      |    |                                          |
| *             | HsFlag-FLJ90652_29 | 2.6951 | 0.1441 | 990.39  | 991.086  | 7004.8                                                                                      | 2 | 1053.6 | 81.2 | 1  | R.VSSDVIDQK.V                            |
| *             | HsScrap_Ti_102.272 | 2.5728 | 0.1717 | 1789.42 | 1788.951 | 5115.1                                                                                      | 1 | 561.5  | 53.8 | 1  | K.VYEIQDIYENSWTK.L                       |
| *             | HsFLAG-FLJ20729_   | 5.393  | 0.3282 | 1973.99 | 1974.313 | 5810.9                                                                                      | 1 | 1650.3 | 50   | 1  | K.IWNVHSLNVLHSLVDK.S                     |
| gi 25188179 r | 2                  | 3      | 7.10%  | 283     | 30659    | 8.6 voltage-dependent anion channel 3 [Homo sapiens]                                        |   |        |      |    |                                          |
| *             | HsFLAG-ARP6_Ti_1   | 3.9631 | 0.1959 | 2101.89 | 2102.442 | 6071.2                                                                                      | 1 | 821.7  | 35.5 | 1  | K.VNNASLIGLGYTQTLRPGVK.L                 |
| *             | HsFLAG-ARP6_Ti_1   | 3.7192 | 0.2164 | 2103.3  | 2102.442 | 5286.9                                                                                      | 1 | 682.9  | 52.6 | 2  | K.VNNASLIGLGYTQTLRPGVK.L                 |
| gi 5454158 re | 4                  | 12     | 7.00%  | 1264    | 140476   | 7.6 valyl-tRNA synthetase [Homo sapiens]                                                    |   |        |      |    |                                          |
|               | HsFLAG-FLJ20729_   | 3.5004 | 0.3427 | 1597.96 | 1598.674 | 6123.2                                                                                      | 1 | 910.7  | 66.7 | 1  | R.YGEAGEGPGWGGAHPR.I                     |
| *             | HsFLAG-ARP6_Ti_1   | 2.6719 | 0.2751 | 2188.25 | 2188.5   | 11876.4                                                                                     | 1 | 586.4  | 36.8 | 1  | R.SLPIVFDEFVDMDFGTGAVK.I                 |
| *             | HsFlag-VPS71_Ti_10 | 6.1766 | 0.4768 | 3907.32 | 3906.382 | 5247.5                                                                                      | 1 | 766    | 27.9 | 8  | K.SLGNVIDPLDVIYGISLQGLHNQLLNSNLDPSEVEK.A |
| *             | HsFLAG-ARP6_Ti_1   | 2.8099 | 0.3126 | 1953.67 | 1955.322 | 4360.8                                                                                      | 1 | 380.5  | 50   | 2  | R.LLSPFMPFVTEELFQR.L                     |
| gi 7661952 re | 3                  | 4      | 7.00%  | 963     | 109935   | 5.6 squamous cell carcinoma antigen recognized by T cells 3 [Homo sapiens]                  |   |        |      |    |                                          |
| *             | HsH2AZ-FLAG_293_   | 3.4633 | 0.2621 | 1779.82 | 1779.002 | 6151.7                                                                                      | 1 | 545    | 53.6 | 1  | K.YKPYEEALLQAEAPR.L                      |
| *             | HsFlag-VPS71_Ti_10 | 4.2041 | 0.3655 | 2402.91 | 2401.691 | 3974.9                                                                                      | 1 | 454.5  | 50   | 1  | K.LFISGLPFSCCKEELEEICK.A                 |
| *             | HsH2AZ-FLAG_293_   | 5.7648 | 0.3707 | 2968.21 | 2967.311 | 4181.9                                                                                      | 1 | 712.4  | 30.6 | 2  | R.ALQRPSAAAPQAENGPAAPAAVAAPAATEAPK.M     |
| gi 7705373 re | 5                  | 9      | 7.00%  | 759     | 85226    | 6.8 epithelial protein lost in neoplasm beta [Homo sapiens]                                 |   |        |      |    |                                          |
| *             | HsFLAG-Lin9_Ti_20  | 3.9068 | 0.3262 | 1174.33 | 1174.299 | 10397.5                                                                                     | 1 | 2228.4 | 90   | 2  | K.ISANENSLAVR.S                          |
| *             | HsFLAG-ARP6_Ti_1   | 4.0557 | 0.4193 | 1733.72 | 1733.977 | 6998.8                                                                                      | 1 | 1176   | 69.2 | 2  | R.LLANQQVFHISCFR.C                       |

|             |                    |        |        |         |          |         |   |        |      |   |                                                                                                                      |
|-------------|--------------------|--------|--------|---------|----------|---------|---|--------|------|---|----------------------------------------------------------------------------------------------------------------------|
| *           | HsFLAG-ARP6_Ti_1   | 2.5716 | 0.3032 | 1274.85 | 1275.45  | 8313.1  | 3 | 612.3  | 59.1 | 1 | K.LSLGTYASLHGR.I                                                                                                     |
| *           | HsFLAG-Lin9_Ti_20  | 4.7323 | 0.3499 | 1713.41 | 1713.931 | 9429.8  | 1 | 1792.5 | 70   | 2 | R.SRPFTVAASFQSTSVK.S                                                                                                 |
| *           | HsFLAG-ARP6_Ti_1   | 4.405  | 0.4113 | 1713.99 | 1713.931 | 11405.3 | 1 | 2379.6 | 48.3 | 2 | R.SRPFTVAASFQSTSVK.S                                                                                                 |
| gi 20070197 | r                  | 2      | 2      | 7.00%   | 456      | 50702   |   |        |      |   | 6.4 dolichyl-diphosphooligosaccharide-protein glycosyltransferase [Homo sapiens]                                     |
| *           | HsFLAG-ARP6_Ti_1   | 2.6196 | 0.228  | 1211.58 | 1211.406 | 5283.5  | 1 | 578.6  | 70   | 1 | K.PITQYPHAVGK.N                                                                                                      |
| *           | HsFLAG-ARP6_Ti_1   | 3.2805 | 0.3473 | 2346.02 | 2343.598 | 6554.2  | 1 | 547.9  | 47.5 | 1 | R.VIFSGSLDFFSDFSFFNSAVQK.A                                                                                           |
| gi 20127499 | r                  | 3      | 5      | 7.00%   | 344      | 39587   |   |        |      |   | 11.4 arginine/serine-rich splicing factor 6 [Homo sapiens]                                                           |
|             | HsFLAG-ARP6_Ti_1   | 3.3368 | 0.2897 | 1421.21 | 1420.478 | 6440.6  | 1 | 1207.5 | 77.3 | 2 | K.NGYGFVEFEDSR.D                                                                                                     |
|             | HsFLAG-ARP6_Ti_1   | 3.1669 | 0.2486 | 1309.13 | 1310.36  | 6762.5  | 1 | 593.7  | 59.1 | 1 | R.DADDAVYELNGK.E                                                                                                     |
|             | HsFLAG-ARP6_Ti_1   | 4.2565 | 0.1753 | 1309.27 | 1310.36  | 4682.8  | 1 | 1253   | 86.4 | 2 | R.DADDAVYELNGK.E                                                                                                     |
| gi 75709192 | r                  | 1      | 2      | 7.00%   | 329      | 36560   |   |        |      |   | 4.6 hypothetical protein LOC29086 [Homo sapiens]                                                                     |
| gi 75709194 | r                  | 1      | 2      | 7.00%   | 329      | 36560   |   |        |      |   | 4.6 hypothetical protein LOC29086 [Homo sapiens]                                                                     |
|             | HsSrcap_Ti_201.067 | 4.7952 | 0.4202 | 2107.6  | 2108.094 | 6235.3  | 1 | 1459.3 | 59.1 | 2 | R.SEGEGEAASADDGSLNTSGAGPK.S                                                                                          |
| gi 5453567  | re                 | 1      | 2      | 7.00%   | 299      | 33593   |   |        |      |   | 4.8 craniofacial development protein 1 [Homo sapiens]                                                                |
| *           | HsH2AZ-FLAG_293_   | 4.0732 | 0.4306 | 2062.46 | 2062.374 | 4078    | 1 | 462.7  | 52.5 | 2 | K.EKPQANVPSALPSLPAGSGLK.R                                                                                            |
| gi 71143137 | r                  | 1      | 2      | 7.00%   | 200      | 22980   |   |        |      |   | 8.4 high-mobility group box 3 [Homo sapiens]                                                                         |
| gi 89030313 | r                  | 1      | 2      | 6.20%   | 224      | 25484   |   |        |      |   | 8.8 PREDICTED: similar to high-mobility group box 3 [Homo sapiens]                                                   |
| gi 89029245 | r                  | 1      | 2      | 6.20%   | 224      | 25484   |   |        |      |   | 8.8 PREDICTED: similar to high-mobility group box 3 [Homo sapiens]                                                   |
|             | HsFLAG-p53-DNA-D   | 3.2159 | 0.1984 | 1606.53 | 1606.819 | 4034.3  | 3 | 523.5  | 65.4 | 2 | K.KNPEVPVNFAEFSK.K                                                                                                   |
| gi 50363217 | r                  | 2      | 3      | 6.90%   | 418      | 46737   |   |        |      |   | 5.6 serine (or cysteine) proteinase inhibitor, clade A (alpha-1 antipeptidase, antitrypsin), member 1 [Homo sapiens] |
| gi 50363221 | r                  | 2      | 3      | 6.90%   | 418      | 46737   |   |        |      |   | 5.6 serine (or cysteine) proteinase inhibitor, clade A (alpha-1 antipeptidase, antitrypsin), member 1 [Homo sapiens] |
| gi 50363219 | r                  | 2      | 3      | 6.90%   | 418      | 46737   |   |        |      |   | 5.6 serine (or cysteine) proteinase inhibitor, clade A (alpha-1 antipeptidase, antitrypsin), member 1 [Homo sapiens] |
|             | HsFLAG-p53-DNA-D   | 3.4401 | 0.3178 | 1780.45 | 1780.808 | 7687.4  | 1 | 721.1  | 53.6 | 2 | K.TDTSHHQDHPFNK.I                                                                                                    |
|             | HsFLAG-p53-DNA-D   | 2.7344 | 0.136  | 1642.21 | 1642.895 | 4497.1  | 1 | 382.3  | 57.7 | 1 | K.ITPNLAEFAFSLYR.Q                                                                                                   |
| gi 13899265 | r                  | 2      | 4      | 6.90%   | 390      | 43880   |   |        |      |   | 9 Ras association (RalGDS/AF-6) domain family 5 isoform D [Homo sapiens]                                             |
| gi 32996735 | r                  | 2      | 4      | 10.20%  | 265      | 30359   |   |        |      |   | 8.1 Ras association (RalGDS/AF-6) domain family 5 isoform C [Homo sapiens]                                           |
| gi 32996731 | r                  | 2      | 4      | 6.50%   | 418      | 47090   |   |        |      |   | 9.1 Ras association (RalGDS/AF-6) domain family 5 isoform A [Homo sapiens]                                           |
|             | HsFLAG-FLJ20729_   | 2.8225 | 0.134  | 1425.01 | 1424.683 | 6687    | 1 | 705.9  | 59.1 | 1 | K.RTSFYLPDLAIK.Q                                                                                                     |
|             | HsFLAG-FLJ20729_   | 3.6059 | 0.2429 | 1603.6  | 1602.912 | 9561.7  | 1 | 956    | 60.7 | 3 | R.LLAGPDTEVLSFVLK.E                                                                                                  |
| gi 4502101  | re                 | 2      | 2      | 6.90%   | 346      | 38714   |   |        |      |   | 7 annexin I [Homo sapiens]                                                                                           |
| *           | HsFlag-VPS71_Ti_1( | 3.4273 | 0.3246 | 2357.13 | 2357.585 | 4963.4  | 2 | 311.5  | 34.8 | 1 | K.GGPGSAVSPYPTFNPSDVAALHK.A                                                                                          |
| *           | HsFlag-VPS71_Ti_1( | 3.9151 | 0.2913 | 2358.8  | 2357.585 | 5543.3  | 1 | 538.9  | 28.3 | 1 | K.GGPGSAVSPYPTFNPSDVAALHK.A                                                                                          |
| gi 31795538 | r                  | 1      | 2      | 6.90%   | 202      | 22710   |   |        |      |   | 9 replication factor C 3 isoform 2 [Homo sapiens]                                                                    |
| gi 4506489  | re                 | 1      | 2      | 3.90%   | 356      | 40556   |   |        |      |   | 8.3 replication factor C 3 isoform 1 [Homo sapiens]                                                                  |
|             | HsFlag-VPS71_Ti_1( | 4.4431 | 0.4183 | 1590.48 | 1590.69  | 8330    | 1 | 2056.5 | 84.6 | 2 | K.TVAQSQLETNSQR.D                                                                                                    |
| gi 5032169  | re                 | 2      | 2      | 6.80%   | 500      | 55551   |   |        |      |   | 9.2 telomeric repeat binding factor 2 [Homo sapiens]                                                                 |
| *           | HsFLAG-Lin9_Ti_20  | 4.5523 | 0.414  | 2164.06 | 2165.413 | 5214.5  | 1 | 828.3  | 61.8 | 1 | K.NLAHPVIQNFYSYETFQQK.M                                                                                              |
| *           | HsFlag-NUFIP_Ti_2( | 3.2438 | 0.33   | 1634.35 | 1634.957 | 6527.8  | 1 | 844.9  | 63.3 | 1 | K.DLVLPTQALPASPALK.N                                                                                                 |
| gi 19923106 | r                  | 1      | 2      | 6.80%   | 355      | 39731   |   |        |      |   | 5.2 paraoxonase 1 [Homo sapiens]                                                                                     |
| *           | HsSrcap_Ti_202.433 | 4.6065 | 0.2315 | 2459.75 | 2461.772 | 4768.5  | 3 | 421.7  | 39.1 | 2 | K.GIETGSEDLEILPNGLAFISSGLK.Y                                                                                         |
| gi 4557495  | re                 | 3      | 10     | 6.70%   | 717      | 82922   |   |        |      |   | 8.1 cleavage stimulation factor subunit 3 isoform 1 [Homo sapiens]                                                   |
| *           | HsFlag-VPS71_Ti_1( | 3.6849 | 0.244  | 1731.65 | 1730.989 | 5765.9  | 1 | 860.7  | 65.4 | 1 | R.GCVNPMINIEQLWR.D                                                                                                   |
| *           | HsFLAG-FLJ20729_   | 3.5894 | 0.2226 | 2138.46 | 2139.555 | 7812.1  | 1 | 485.1  | 44.1 | 3 | R.LLAIEDIDPTLVYIQYMK.F                                                                                               |

|               |                     |        |        |         |          |         |   |        |      |   |                                                                                          |
|---------------|---------------------|--------|--------|---------|----------|---------|---|--------|------|---|------------------------------------------------------------------------------------------|
| *             | HsFLAG-p53-DNA-D    | 4.9358 | 0.3663 | 1739.31 | 1739.021 | 7831.9  | 1 | 1524.8 | 70   | 6 | R.FLAFESNIGDLASILK.V                                                                     |
| gij11024686 r |                     | 3      | 4      | 6.70%   | 706      | 80103   |   |        |      |   | 6.8 hypothetical protein LOC55726 [Homo sapiens]                                         |
| *             | HsFlag-VPS71_Ti_1(  | 2.6133 | 0.3421 | 2302.63 | 2303.54  | 10624.2 | 1 | 504.4  | 39.5 | 1 | K.CELVLIHTYPVGEDSLVSDR.S                                                                 |
| *             | HsFlag-FLJ90652_2(  | 4.0623 | 0.3291 | 1712.2  | 1712.825 | 7772.9  | 1 | 1212.2 | 69.2 | 1 | R.TNNIELHYCTGAYR.I                                                                       |
| *             | HsFlag-FLJ90652_2(  | 3.4726 | 0.2387 | 1398.33 | 1398.602 | 4595.6  | 1 | 806.3  | 75   | 2 | R.KNDPLPISTVGTR.G                                                                        |
| gij21359951 r |                     | 2      | 2      | 6.70%   | 480      | 50414   |   |        |      |   | 9.6 hypothetical protein LOC79171 [Homo sapiens]                                         |
| *             | HsFlag-DPCD_Ti_20   | 2.9846 | 0.135  | 1922.57 | 1922.068 | 11294.7 | 1 | 890.7  | 50   | 1 | R.IFCGDLGNEVNDDILAR.A                                                                    |
| *             | HsFLAG-p53-DNA-D    | 3.6691 | 0.2631 | 1739.58 | 1737.909 | 6124.5  | 2 | 527.3  | 53.6 | 1 | K.GYGFVSKDPSPDYVR.A                                                                      |
| gij4826762 re |                     | 2      | 2      | 6.70%   | 406      | 45205   |   |        |      |   | 6.6 haptoglobin [Homo sapiens]                                                           |
| *             | HsFLAG-p53-DNA-D    | 2.7682 | 0.2566 | 1835.57 | 1836.122 | 5002.7  | 1 | 694.8  | 60   | 1 | R.VMPICLPSKDYAEVGR.V                                                                     |
| *             | HsFLAG-p53-DNA-D    | 3.0994 | 0.1811 | 1275.4  | 1275.404 | 7500.2  | 2 | 971.9  | 75   | 1 | R.HYEGSTVPEKK.T                                                                          |
| gij4503609 re |                     | 1      | 2      | 6.70%   | 255      | 27844   |   |        |      |   | 8.1 electron-transfer-flavoprotein, beta polypeptide isoform 1 [Homo sapiens]            |
| gij62420877 r |                     | 1      | 2      | 4.90%   | 346      | 37434   |   |        |      |   | 7.2 electron-transfer-flavoprotein, beta polypeptide isoform 2 [Homo sapiens]            |
|               | HsFLAG-p53-DNA-D    | 4.8814 | 0.3907 | 1812.85 | 1813.145 | 5678.4  | 1 | 1152.8 | 68.8 | 2 | K.KIEVIKPGDLGVDLTSK.L                                                                    |
| gij4502013 re |                     | 1      | 2      | 6.70%   | 239      | 26478   |   |        |      |   | 7.8 adenylate kinase 2 isoform a [Homo sapiens]                                          |
| gij7524346 re |                     | 1      | 2      | 6.90%   | 232      | 25615   |   |        |      |   | 7.9 adenylate kinase 2 isoform b [Homo sapiens]                                          |
|               | HsFLAG-p53-DNA-D    | 4.8827 | 0.4047 | 1996.84 | 1998.246 | 9463.2  | 1 | 1745.9 | 70   | 2 | R.LQAYHTQTTPLIEYR.K                                                                      |
| gij6453818 re |                     | 3      | 5      | 6.60%   | 665      | 73262   |   |        |      |   | 9.5 kinesin family member 22 [Homo sapiens]                                              |
| *             | HsFLAG-ARP6_Ti_1(   | 4.3943 | 0.5014 | 1720.26 | 1720.984 | 7402.3  | 1 | 2049.2 | 76.7 | 2 | K.THTMLGSPEQPGVIPR.A                                                                     |
| *             | HsFLAG-ARP6_Ti_1(   | 5.4944 | 0.5034 | 1669.57 | 1668.931 | 6968.1  | 1 | 1749.9 | 75   | 2 | R.LLASQGSQGAPLLSTPK.R                                                                    |
| *             | HsFLAG-ARP6_Ti_1(   | 3.1746 | 0.2387 | 1084.17 | 1084.264 | 7669.9  | 2 | 1192.7 | 80   | 1 | K.ANILGLAAGQR.C                                                                          |
| gij21361399 r |                     | 2      | 2      | 6.60%   | 589      | 65309   |   |        |      |   | 5.1 alpha isoform of regulatory subunit A, protein phosphatase 2 [Homo sapiens]          |
| *             | HsFLAG-Lin9_Ti_20(  | 3.3167 | 0.3485 | 2213.34 | 2214.486 | 10591.3 | 1 | 722.8  | 44.7 | 1 | R.AISHEHSPDLEAHFVPLVK.R                                                                  |
| *             | HsFlag-VPS71_Ti_1(  | 2.6175 | 0.1426 | 2138.56 | 2139.342 | 6272.5  | 1 | 355    | 41.7 | 1 | K.SEIIPMFSNLASDEQDSVR.L                                                                  |
| gij29789415 r |                     | 1      | 5      | 6.60%   | 243      | 27021   |   |        |      |   | 8.5 juxtaposed with another zinc finger gene 1 [Homo sapiens]                            |
| *             | HsTIP60_Ti_105.252  | 4.5155 | 0.4206 | 1923.19 | 1924.164 | 4622.4  | 1 | 709.6  | 63.3 | 5 | K.QELQQPTYVALSYINR.F                                                                     |
| gij31543653 r |                     | 1      | 2      | 6.60%   | 136      | 14514   |   |        |      |   | 10 signal recognition particle 14kDa (homologous Alu RNA binding protein) [Homo sapiens] |
| *             | HsFLAG-p53-DNA-D    | 2.3228 | 0.1552 | 948.52  | 949.136  | 5436.8  | 1 | 562.9  | 75   | 2 | K.KISTVVSSK.E                                                                            |
| gij62241042 r |                     | 6      | 10     | 6.50%   | 1512     | 170590  |   |        |      |   | 7.3 glutamyl-prolyl tRNA synthetase [Homo sapiens]                                       |
| *             | HsFLAG-p53-DNA-D    | 3.6526 | 0.1421 | 1614.87 | 1614.885 | 7462.5  | 1 | 861    | 61.5 | 2 | K.NPEVGLKPVWYSPK.V                                                                       |
| *             | HsFLAG-ARP6_Ti_1(   | 4.2969 | 0.2592 | 3104.23 | 3105.342 | 8182.8  | 1 | 1038.5 | 29.3 | 1 | K.TGQEYKPGNPPAEIGQNISSNSASILESK.S                                                        |
| *             | HsFlag-FLJ90652_2(  | 2.603  | 0.2274 | 1864.53 | 1865.091 | 8007.9  | 2 | 383    | 41.2 | 1 | K.SLIGVEYKPVSATGAEDK.D                                                                   |
| *             | HsFLAG-ARP6_Ti_1(   | 3.3539 | 0.2257 | 1588.26 | 1588.631 | 6633.8  | 1 | 999.6  | 58.8 | 3 | K.NQGGGLSSSGAGEGQGP.K                                                                    |
| *             | HsFlag-VPS71_Ti_1(  | 2.8288 | 0.1962 | 1717.82 | 1716.805 | 7651.7  | 2 | 499.7  | 38.9 | 1 | K.NQGGGLSSSGAGEGQGP.K                                                                    |
| *             | HsFlag-VPS71_Ti_1(  | 3.0345 | 0.1887 | 1960.99 | 1959.268 | 4102.8  | 9 | 264    | 40.6 | 2 | K.SLCIPFKPLCELQPGAK.C                                                                    |
| gij42476022 r |                     | 3      | 9      | 6.50%   | 843      | 96632   |   |        |      |   | 5.6 hypothetical protein LOC55622 [Homo sapiens]                                         |
| *             | HsFlag-ZnF-HIT2_Ti_ | 3.1923 | 0.3087 | 2445.58 | 2443.602 | 8229.8  | 1 | 644.6  | 42.5 | 2 | K.ETPSLYCLLDVLDHSCYDK.A                                                                  |
| *             | HsFlag-ZnF-HIT2_Ti_ | 3.2074 | 0.2503 | 993.49  | 993.238  | 6389    | 1 | 1235.1 | 88.9 | 4 | R.ALGLAHVAIK.C                                                                           |
| *             | HsFlag-ZnF-HIT2_Ti_ | 5.6222 | 0.3932 | 2739.82 | 2740.011 | 7042.1  | 1 | 1303.8 | 52.2 | 3 | R.ELADDITAMDTLVTELQDLSNQFR.N                                                             |
| gij24475847 r |                     | 2      | 3      | 6.50%   | 642      | 71729   |   |        |      |   | 5.5 influenza virus NS1A binding protein isoform a [Homo sapiens]                        |
| gij54144642 r |                     | 2      | 3      | 19.00%  | 221      | 25381   |   |        |      |   | 5.1 influenza virus NS1A binding protein isoform b [Homo sapiens]                        |
|               | HsFLAG-TCF3_Ti_1(   | 4.2027 | 0.3339 | 2528.86 | 2527.833 | 10043.8 | 1 | 1010.6 | 45.2 | 2 | K.FDDLNPEAVEVLLNYAYTAQLK.A                                                               |
|               | HsFlag-FLJ90652_2(  | 3.6306 | 0.2842 | 2435.84 | 2434.705 | 9766.6  | 1 | 951.9  | 47.4 | 1 | K.VDAYIQEHLQLQISEEEFLK.L                                                                 |

|               |                    |        |        |         |          |                                                                                                 |   |        |      |    |                                       |
|---------------|--------------------|--------|--------|---------|----------|-------------------------------------------------------------------------------------------------|---|--------|------|----|---------------------------------------|
| gij42519916 r | 2                  | 2      | 6.50%  | 673     | 71277    | 5.2 forkhead box O3A [Homo sapiens]                                                             |   |        |      |    |                                       |
| gij4503739 re | 2                  | 2      | 6.50%  | 673     | 71277    | 5.2 forkhead box O3A [Homo sapiens]                                                             |   |        |      |    |                                       |
|               | HsMRGBP-FLAG_Ti_1  | 2.9775 | 0.4183 | 1916.67 | 1917.037 | 3948                                                                                            | 1 | 411.6  | 50   | 1  | K.AALQTAPESADDDSPSQLSK.W              |
|               | HsYL1_Ti_103.2423. | 3.4343 | 0.3838 | 2456.6  | 2457.659 | 5424.1                                                                                          | 1 | 514.8  | 39.6 | 1  | K.GSGLGSPTSSFNSTVFGPSSLNLSR.Q         |
| gij40556376 r | 2                  | 17     | 6.50%  | 553     | 60547    | 9.2 cytokine-like nuclear factor n-pac [Homo sapiens]                                           |   |        |      |    |                                       |
| *             | HsARP6-FLAG_Ti_1   | 4.3263 | 0.3848 | 1889.63 | 1890.335 | 7055                                                                                            | 1 | 1418.5 | 63.9 | 2  | K.IGFLGLGLMGSGIVSNLLK.M               |
| *             | HsFLAG-TCF3_Ti_1   | 4.7965 | 0.3943 | 1706.76 | 1707.026 | 8421                                                                                            | 1 | 2284.7 | 75   | 15 | K.DLVLGPSGVLQGIKIRPGK.C               |
| gij25777615 r | 2                  | 3      | 6.50%  | 324     | 37025    | 6.8 proteasome 26S non-ATPase subunit 7 [Homo sapiens]                                          |   |        |      |    |                                       |
| *             | HsFlag-FLJ90652_2  | 2.9983 | 0.2567 | 1011.17 | 1010.181 | 5799.2                                                                                          | 1 | 939.5  | 87.5 | 1  | R.ITNQVHGLK.G                         |
| *             | HsFLAG-ARP6_Ti_1   | 4.1248 | 0.2445 | 1322.3  | 1322.55  | 6703.2                                                                                          | 1 | 1592.4 | 86.4 | 2  | R.SVVALHNLINNK.I                      |
| gij4504195 re | 1                  | 2      | 6.50%  | 291     | 33044    | 9.7 general transcription factor IIE, polypeptide 2, beta 34kDa [Homo sapiens]                  |   |        |      |    |                                       |
| *             | HsSrcap_Ti_202.451 | 5.001  | 0.2084 | 1997.83 | 1997.253 | 7456.8                                                                                          | 1 | 1148.7 | 55.6 | 2  | R.GLGGILLEDIEEALPNSQK.A               |
| gij45643123 r | 3                  | 12     | 6.40%  | 856     | 95051    | 6.5 nuclear VCP-like isoform 1 [Homo sapiens]                                                   |   |        |      |    |                                       |
| gij45643125 r | 3                  | 12     | 7.30%  | 750     | 82746    | 6.4 nuclear VCP-like isoform 2 [Homo sapiens]                                                   |   |        |      |    |                                       |
|               | HsFLAG-TCF3_Ti_1   | 5.3939 | 0.5088 | 1788.52 | 1789.169 | 8398.4                                                                                          | 1 | 2138.1 | 71.9 | 3  | K.TLLAHAIAGELDLPIK.V                  |
|               | HsFLAG-ARP6_Ti_1   | 4.889  | 0.4578 | 1848.61 | 1849.19  | 5827.5                                                                                          | 1 | 922.3  | 55.3 | 7  | K.ALGLVTPAGVLLAGPPGCGK.T              |
|               | HsFLAG-ARP6_Ti_1   | 4.5849 | 0.4856 | 2110.65 | 2111.291 | 8147.6                                                                                          | 1 | 1260.4 | 61.8 | 2  | K.NSAPCVIFFDEVDAALCPR.R               |
| gij40018640 r | 2                  | 5      | 6.40%  | 531     | 60577    | 9.6 parafibromin [Homo sapiens]                                                                 |   |        |      |    |                                       |
| *             | HsFLAG-p53-DNA-D   | 4.0258 | 0.3385 | 2083.79 | 2083.578 | 4073.5                                                                                          | 1 | 655.2  | 55.3 | 3  | R.TPIIIIPAATTSITMLNAK.D               |
| *             | HsARP6-FLAG_Ti_1   | 3.7292 | 0.3833 | 1576.28 | 1576.882 | 8135.2                                                                                          | 1 | 1088.3 | 61.5 | 2  | R.VVAVFVQGPWQFK.G                     |
| gij10801345 r | 1                  | 2      | 6.40%  | 218     | 25060    | 4.9 eukaryotic translation initiation factor 3, subunit 12 [Homo sapiens]                       |   |        |      |    |                                       |
| *             | HsFlag-VPS71_Ti_1  | 3.3372 | 0.4548 | 1631.97 | 1631.835 | 3285                                                                                            | 2 | 312.1  | 57.7 | 2  | K.ALTNLPHTDFTLCK.C                    |
| gij13376623 r | 1                  | 2      | 6.40%  | 204     | 23671    | 5.8 Ngg1 interacting factor 3 like 1 binding protein 1 [Homo sapiens]                           |   |        |      |    |                                       |
| *             | HsFLAG-p53-DNA-D   | 3.2665 | 0.2917 | 1610.71 | 1610.816 | 7060.7                                                                                          | 1 | 854.4  | 66.7 | 2  | K.VIQHHPDRHETLK.E                     |
| gij17105400 r | 7                  | 13     | 6.30%  | 2044    | 231290   | 6.9 phosphatidylinositol 4-kinase, catalytic, alpha polypeptide isoform 2 [Homo sapiens]        |   |        |      |    |                                       |
| *             | HsFLAG-ARP6_Ti_1   | 3.5341 | 0.2737 | 1983.4  | 1983.315 | 6760.6                                                                                          | 1 | 1067.9 | 55.9 | 1  | R.DAVIALGIFLIESDLQHK.D                |
| *             | HsFLAG-ARP6_Ti_1   | 3.4597 | 0.3492 | 1874.75 | 1874.151 | 5666.9                                                                                          | 1 | 923.9  | 62.5 | 3  | R.SILPSNLLTVCQEGTLK.R                 |
| *             | HsFLAG-ARP6_Ti_1   | 3.0675 | 0.2146 | 1938.22 | 1939.306 | 7928.3                                                                                          | 1 | 885.4  | 50   | 1  | K.ASSSAGNLGVLIPVIAVLR.R               |
|               | HsFLAG-ARP6_Ti_1   | 3.322  | 0.3376 | 2118.86 | 2117.54  | 6795.3                                                                                          | 1 | 583    | 44.7 | 1  | K.LLTLGLSLLHADVVPNATIR.N              |
|               | HsFLAG-ARP6_Ti_1   | 2.877  | 0.2292 | 2188.44 | 2189.605 | 5847.4                                                                                          | 1 | 452    | 47.2 | 2  | R.SFPPDAILFYIPQIVQALR.Y               |
|               | HsFLAG-ARP6_Ti_1   | 4.2832 | 0.2978 | 1445.46 | 1444.757 | 6877                                                                                            | 1 | 1183.2 | 75   | 4  | K.ITNVSAIKPYPK.G                      |
|               | HsFLAG-ARP6_Ti_1   | 3.1988 | 0.3359 | 2391.64 | 2392.677 | 3842.4                                                                                          | 1 | 492.1  | 52.5 | 1  | K.VQPGCYLPSNPEAIVLDIDYK.S             |
| gij7657269 re | 4                  | 8      | 6.30%  | 1447    | 164666   | 8.5 androgen-induced prostate proliferative shutoff associated protein [Homo sapiens]           |   |        |      |    |                                       |
| gij7705288 re | 4                  | 8      | 6.50%  | 1391    | 158035   | 8.6 androgen-induced prostate proliferative shutoff associated protein isoform 2 [Homo sapiens] |   |        |      |    |                                       |
|               | HsFLAG-FLJ20729_1  | 3.0878 | 0.2252 | 2007.52 | 2008.368 | 10006.6                                                                                         | 1 | 928    | 53.1 | 1  | K.ELYLNALHLASDFFLK.H                  |
|               | HsFLAG-FLJ20729_2  | 4.538  | 0.3571 | 2735.53 | 2736.106 | 9261.8                                                                                          | 1 | 1085.5 | 31.5 | 1  | K.VLSFTHPISFHSAETFESLLACK.M           |
|               | HsFLAG-Lin9_Ti_20  | 5.293  | 0.4492 | 3505.74 | 3507.111 | 9598.1                                                                                          | 1 | 916.4  | 25   | 3  | K.SLDPSNLEHLITPLVTIGHIALLAPDQFAAPLK.S |
|               | HsFLAG-p53-DNA-D   | 4.3483 | 0.3753 | 1657.5  | 1657.908 | 6074.9                                                                                          | 1 | 981.3  | 62.5 | 3  | K.TTNVLGAVNKPLSSAGK.Q                 |
| gij32307148 r | 4                  | 7      | 6.30%  | 1046    | 116924   | 6.7 O-linked GlcNAc transferase isoform 1 [Homo sapiens]                                        |   |        |      |    |                                       |
| gij32307150 r | 4                  | 7      | 6.40%  | 1036    | 115706   | 6.7 O-linked GlcNAc transferase isoform 2 [Homo sapiens]                                        |   |        |      |    |                                       |
|               | HsFlag-FLJ90652_2  | 1.9168 | 0.1465 | 1074.29 | 1075.253 | 4102.2                                                                                          | 4 | 350.8  | 61.1 | 1  | R.SAHFSTLAIK.Q                        |
|               | HsH2AZ-FLAG_293_1  | 4.2258 | 0.3637 | 2191.58 | 2191.532 | 6652.9                                                                                          | 1 | 762.4  | 50   | 4  | K.AVTLDPNFLDAYINLGNVLK.E              |
|               | HsFlag-VPS71_Ti_1  | 3.0852 | 0.3199 | 1781.64 | 1781.973 | 6146.9                                                                                          | 1 | 869.4  | 63.3 | 1  | R.LCPHADSLNLANIK.R                    |



|                |                     |        |        |         |          |         |                                                                                     |        |      |    |                                           |
|----------------|---------------------|--------|--------|---------|----------|---------|-------------------------------------------------------------------------------------|--------|------|----|-------------------------------------------|
|                | HsFLAG-Lin9_Ti_20'  | 3.0803 | 0.3059 | 2423.56 | 2423.65  | 7279.6  | 4                                                                                   | 261.2  | 31.6 | 1  | R.SQYGLPEDAIVYCNFNQLYK.I                  |
| gij 21361918 r | 2                   | 3      | 6.30%  | 804     | 90544    | 5.8     | leucine proline-enriched proteoglycan (leprecan) 1 [Homo sapiens]                   |        |      |    |                                           |
| *              | HsFlag-VPS71_Ti_10' | 4.9696 | 0.454  | 4350.18 | 4351.658 | 9336.5  | 1                                                                                   | 704.8  | 21.4 | 2  | R.ALCEGPYDYDGYNYLEYNADLFQAITDHYIQLVNLCK.Q |
| *              | HsFlag-VPS71_Ti_10' | 3.8808 | 0.3912 | 1488.63 | 1487.612 | 7820.8  | 1                                                                                   | 1050.5 | 64.3 | 1  | R.AVGFSSTENPHGVK.A                        |
| gij 11863154 r | 1                   | 6      | 6.30%  | 511     | 57210    | 6.2     | archain [Homo sapiens]                                                              |        |      |    |                                           |
| *              | HsFLAG-FLJ20729_1   | 5.8393 | 0.3303 | 3086.13 | 3086.441 | 11732.2 | 1                                                                                   | 1426.7 | 28.2 | 6  | K.APGFGGFGSSAVSGSTAAMITETIETDKPK.V        |
| gij 4503735 re | 2                   | 2      | 6.30%  | 553     | 56788    | 8.6     | forkhead box C1 [Homo sapiens]                                                      |        |      |    |                                           |
| *              | HsFLAG-FLJ20729_1   | 3.5412 | 0.3937 | 1347.22 | 1347.513 | 4934    | 1                                                                                   | 544.5  | 68.2 | 1  | R.AYGPYTPQPQPK.D                          |
| *              | HsFLAG-Lin9_Ti_20'  | 2.5938 | 0.2781 | 2090.64 | 2090.255 | 7667.7  | 2                                                                                   | 394.2  | 36.4 | 1  | R.GSPQSAAEELSSGLLASAAASSR.A               |
| gij 22027516 r | 2                   | 9      | 6.30%  | 476     | 54192    | 5.6     | serine carboxypeptidase vitellogenic-like [Homo sapiens]                            |        |      |    |                                           |
| gij 22027518 r | 2                   | 9      | 6.30%  | 476     | 54192    | 5.6     | serine carboxypeptidase vitellogenic-like [Homo sapiens]                            |        |      |    |                                           |
|                | HsFLAG-p53-DNA-D    | 4.8072 | 0.3574 | 2124.41 | 2123.456 | 5762.5  | 1                                                                                   | 910.9  | 59.4 | 8  | R.DLYSALIQQFFQIFPEYK.N                    |
|                | HsFLAG-ARP6_Ti_10'  | 3.0068 | 0.1226 | 1423.23 | 1423.615 | 4095.3  | 1                                                                                   | 675.6  | 66.7 | 1  | R.GGGHILPYDQPLR.A                         |
| gij 88998579 r | 1                   | 5      | 6.30%  | 271     | 29390    | 8.2     | PREDICTED: similar to lactate dehydrogenase A-like 6B [Homo sapiens]                |        |      |    |                                           |
| gij 88999411 r | 1                   | 5      | 6.30%  | 271     | 29390    | 8.2     | PREDICTED: similar to lactate dehydrogenase A-like 6B [Homo sapiens]                |        |      |    |                                           |
| gij 88998821 r | 1                   | 5      | 6.30%  | 271     | 29390    | 8.2     | PREDICTED: similar to lactate dehydrogenase A-like 6B [Homo sapiens]                |        |      |    |                                           |
|                | HsFlag-VPS71_Ti_10' | 5.8428 | 0.1271 | 1944.84 | 1946.297 | 4268.8  | 1                                                                                   | 1346.3 | 81.2 | 5  | K.LIIVSNPVDNLTYVAWK.L                     |
| gij 27477134 r | 7                   | 9      | 6.20%  | 1887    | 205109   | 6.8     | nucleoporin 210 [Homo sapiens]                                                      |        |      |    |                                           |
| *              | HsFLAG-ARP6_Ti_10'  | 4.8836 | 0.4048 | 2772.54 | 2773.038 | 8886.5  | 1                                                                                   | 1366.6 | 35.9 | 2  | R.WLSTRPEVASIEPLGLDEQQCSQK.A              |
| *              | HsFLAG-ARP6_Ti_10'  | 3.3259 | 0.3126 | 1877.34 | 1878.176 | 8277.8  | 1                                                                                   | 558.3  | 46.9 | 1  | R.LTSIFAEDITTGQVLR.C                      |
| *              | HsFLAG-ARP6_Ti_10'  | 3.6785 | 0.24   | 1449.34 | 1449.641 | 5473.3  | 1                                                                                   | 1174.2 | 81.8 | 1  | R.ELYLEDSPLELK.I                          |
| *              | HsFLAG-ARP6_Ti_10'  | 3.7468 | 0.3138 | 2152.49 | 2153.4   | 7908.6  | 1                                                                                   | 654.6  | 44.4 | 2  | R.VSPEEVTIYNHPGIQAEI.R                    |
| *              | HsFLAG-ARP6_Ti_10'  | 3.0674 | 0.0984 | 2546.75 | 2544.966 | 9801.4  | 1                                                                                   | 1188   | 45.2 | 1  | K.LQLLNPEIEAEQILMSPNSYIK.L                |
| *              | HsFLAG-ARP6_Ti_10'  | 2.9911 | 0.3629 | 1021.71 | 1022.189 | 4419.9  | 1                                                                                   | 868    | 87.5 | 1  | K.VPVVHVDEK.G                             |
| *              | HsFLAG-ARP6_Ti_10'  | 4.1598 | 0.2214 | 1544.3  | 1544.788 | 3344.5  | 1                                                                                   | 1204.4 | 84.6 | 1  | R.VFGAPEVLENLEVK.S                        |
| gij 19923399 r | 2                   | 2      | 6.20%  | 482     | 54121    | 5.6     | Ras-GTPase activating protein SH3 domain-binding protein 2 isoform a [Homo sapiens] |        |      |    |                                           |
| gij 45359849 r | 2                   | 2      | 6.20%  | 482     | 54121    | 5.6     | Ras-GTPase activating protein SH3 domain-binding protein 2 isoform a [Homo sapiens] |        |      |    |                                           |
| gij 45359846 r | 2                   | 2      | 6.70%  | 449     | 50817    | 5.4     | Ras-GTPase activating protein SH3 domain-binding protein 2 isoform b [Homo sapiens] |        |      |    |                                           |
|                | HsFlag-VPS71_Ti_10' | 2.8053 | 0.3374 | 1465.34 | 1465.649 | 3423.6  | 1                                                                                   | 486.2  | 70.8 | 1  | R.VEAKPEVQSQPPR.V                         |
|                | HsFlag-VPS71_Ti_10' | 4.8442 | 0.472  | 1968.25 | 1967.188 | 6393.2  | 1                                                                                   | 1282.9 | 65.6 | 1  | K.LPNFGFVVDSEPVQR.I                       |
| gij 4502317 re | 1                   | 2      | 6.20%  | 226     | 26145    | 8       | ATPase, H+ transporting, lysosomal 31kD, V1 subunit E isoform 1 [Homo sapiens]      |        |      |    |                                           |
| *              | HsFLAG-ARP6_Ti_10'  | 4.6929 | 0.2731 | 1587.61 | 1587.77  | 6522.9  | 1                                                                                   | 2050.5 | 80.8 | 2  | R.ARDDLITDLLNEAK.Q                        |
| gij 4506331 re | 1                   | 5      | 6.20%  | 145     | 16386    | 6.7     | 6-pyruvoyltetrahydropterin synthase [Homo sapiens]                                  |        |      |    |                                           |
| *              | HsFLAG-FLJ20436_1   | 2.0017 | 0.1779 | 987.89  | 988.258  | 3539.8  | 1                                                                                   | 610.3  | 81.2 | 5  | K.VLPVGVLYK.V                             |
| gij 52630322 r | 7                   | 25     | 6.10%  | 1966    | 222859   | 7.5     | chromodomain helicase DNA binding protein 3 isoform 2 [Homo sapiens]                |        |      |    |                                           |
| gij 52630326 r | 7                   | 25     | 6.00%  | 2000    | 226590   | 7.3     | chromodomain helicase DNA binding protein 3 isoform 1 [Homo sapiens]                |        |      |    |                                           |
| gij 52630324 r | 7                   | 25     | 5.90%  | 2045    | 231360   | 6.4     | chromodomain helicase DNA binding protein 3 isoform 3 [Homo sapiens]                |        |      |    |                                           |
|                | HsFlag-VPS71_Ti_10' | 2.7171 | 0.3393 | 2040.89 | 2041.283 | 6293.3  | 1                                                                                   | 574.1  | 44.4 | 1  | R.FSWAQGTDTILADEMGLGK.T                   |
|                | HsSrcap_Ti_203.417  | 4.7188 | 0.4454 | 1902.17 | 1901.216 | 4477.5  | 1                                                                                   | 929.1  | 68.8 | 14 | K.GPFLVSAPLSTIINWER.E                     |
|                | HsFLAG-Lin9_Ti_20'  | 4.5874 | 0.4438 | 3037.87 | 3037.529 | 4231.5  | 1                                                                                   | 517.6  | 30   | 2  | K.LLLTGTPLQNNLEELFHLLNFLTPER.F            |
|                | HsFLAG-Lin9_Ti_20'  | 2.9889 | 0.1994 | 2022.9  | 2022.258 | 7243.5  | 1                                                                                   | 803.3  | 56.2 | 3  | K.CCNHPYLFVAAMESPK.L                      |
|                | HsSrcap_Ti_204.333  | 5.2483 | 0.5175 | 1857.91 | 1858.073 | 4627.8  | 1                                                                                   | 861.4  | 73.3 | 3  | R.FNAPGAQQFCFLSTR.A                       |
|                | HsFLAG-ARP5_Ti_10'  | 2.8267 | 0.2021 | 1554.29 | 1554.619 | 6562.7  | 3                                                                                   | 601.9  | 68.2 | 1  | R.HHYEQQEDLAR.N                           |

|             |                    |        |        |         |          |         |   |        |      |   |                                                                                                                   |
|-------------|--------------------|--------|--------|---------|----------|---------|---|--------|------|---|-------------------------------------------------------------------------------------------------------------------|
|             | HsSrcap_Ti_203.304 | 3.709  | 0.2644 | 1554.79 | 1554.827 | 7815.9  | 1 | 1364.1 | 75   | 1 | K.LLEQALVIEEQLR.R                                                                                                 |
| gi 39995084 | 4                  | 6      | 6.10%  | 1042    | 118013   |         |   |        |      |   | 5.8 hypothetical protein LOC65123 [Homo sapiens]                                                                  |
| *           | HsFLAG-FLJ20729_   | 3.9719 | 0.1821 | 1953.09 | 1954.026 | 7430.5  | 1 | 2510.8 | 40.7 | 1 | K.GAAAAAASGAAGGGGGGAGAGAPGGGR.L                                                                                   |
| *           | HsFLAG-FLJ20729_   | 4.5343 | 0.3789 | 1953.14 | 1954.026 | 5845.5  | 1 | 2009.1 | 61.1 | 1 | K.GAAAAAASGAAGGGGGGAGAGAPGGGR.L                                                                                   |
| *           | HsSrcap_Ti_204.285 | 3.7378 | 0.3162 | 2305.72 | 2306.587 | 5797.3  | 1 | 704.5  | 52.8 | 2 | R.LLCHLTPSIYTEFPDETLR.S                                                                                           |
| *           | HsFlag-VPS71_Ti_10 | 4.9794 | 0.3499 | 2020.71 | 2020.337 | 8298.6  | 1 | 1389.4 | 59.4 | 2 | K.LAQLTLEQILEHLDNLR.L                                                                                             |
| gi 7705369  | re                 | 4      | 7      | 6.10%   | 953      | 107142  |   |        |      |   | 6 coatomer protein complex, subunit beta [Homo sapiens]                                                           |
| *           | HsFLAG-Lin9_Ti_20  | 5.1285 | 0.4119 | 2491.35 | 2491.806 | 8316.1  | 1 | 1880.7 | 41.2 | 2 | R.NFEHLIPDAPELIHDFLVNEK.D                                                                                         |
| *           | HsFLAG-Lin9_Ti_20  | 4.1968 | 0.3469 | 1953.56 | 1954.185 | 4126.1  | 1 | 805.2  | 61.8 | 2 | K.EAGELKPEEEITVGPVQK.L                                                                                            |
| *           | HsFLAG-Lin9_Ti_20  | 4.0682 | 0.2115 | 2091.59 | 2091.458 | 6197.4  | 5 | 764.4  | 36.1 | 1 | K.LVEKPSPLTLAPHDFANIK.A                                                                                           |
| *           | HsFLAG-Lin9_Ti_20  | 4.0232 | 0.4227 | 2091.91 | 2091.458 | 5901.4  | 1 | 751.5  | 52.8 | 2 | K.LVEKPSPLTLAPHDFANIK.A                                                                                           |
| gi 7706427  | re                 | 2      | 4      | 6.10%   | 684      | 77486   |   |        |      |   | 5.6 cleavage and polyadenylation specific factor 3, 73kDa [Homo sapiens]                                          |
| *           | HsFlag-VPS71_Ti_10 | 2.766  | 0.3732 | 1375.35 | 1375.493 | 5704.3  | 2 | 617.7  | 70   | 1 | R.FCNTVHDIVNR.G                                                                                                   |
| *           | HsFlag-VPS71_Ti_10 | 5.5019 | 0.3361 | 3684.64 | 3685.171 | 6531    | 1 | 895.7  | 28.3 | 3 | R.AQELLLILDEYWNHPELHDIPIYYASSLAK.K                                                                                |
| gi 5032093  | re                 | 2      | 4      | 6.10%   | 541      | 56598   |   |        |      |   | 5.5 solute carrier family 1 (neutral amino acid transporter), member 5 [Homo sapiens]                             |
| *           | HsFLAG-ARP6_Ti_10  | 3.3911 | 0.3665 | 1436.38 | 1436.654 | 4427.8  | 1 | 617.3  | 70.8 | 2 | R.NIFPSNLVSAAFR.S                                                                                                 |
| *           | HsFLAG-ARP6_Ti_10  | 3.5872 | 0.3832 | 2158.29 | 2159.485 | 4872.3  | 1 | 735.6  | 57.9 | 2 | K.SELPLDPLVPTEEGNPLK.H                                                                                            |
| gi 50811883 | re                 | 2      | 2      | 6.10%   | 524      | 51391   |   |        |      |   | 12.4 decreased expression in renal and prostate [Homo sapiens]                                                    |
| gi 50811885 | re                 | 2      | 2      | 6.10%   | 524      | 51391   |   |        |      |   | 12.4 decreased expression in renal and prostate [Homo sapiens]                                                    |
|             | HsFLAG-ARP6_Ti_10  | 2.6458 | 0.2743 | 1654.9  | 1654.91  | 5933.1  | 1 | 465.7  | 47.1 | 1 | R.PGGLLPGPGPGPTLNPR.T                                                                                             |
|             | HsFLAG-ARP6_Ti_10  | 3.2386 | 0.1778 | 1334.07 | 1334.518 | 3899.2  | 2 | 651.1  | 69.2 | 1 | R.TGALPGPGPLSNPR.L                                                                                                |
| gi 42560246 | re                 | 1      | 4      | 6.10%   | 346      | 39250   |   |        |      |   | 5.5 RNA polymerase I subunit isoform 1 [Homo sapiens]                                                             |
| gi 4759046  | re                 | 1      | 4      | 6.10%   | 342      | 38647   |   |        |      |   | 6 RNA polymerase I subunit isoform 2 [Homo sapiens]                                                               |
|             | HsFlag-NUFIP_Ti_10 | 5.5614 | 0.3961 | 2294.64 | 2295.592 | 5071.6  | 1 | 911.2  | 57.5 | 4 | R.LLPDITLLEPVEGEAAEELSR.C                                                                                         |
| gi 16905517 | re                 | 1      | 7      | 6.10%   | 262      | 31301   |   |        |      |   | 11.3 FUS interacting protein (serine-arginine rich) 1 isoform 2 [Homo sapiens]                                    |
| gi 88952702 | re                 | 1      | 7      | 15.10%  | 106      | 12581   |   |        |      |   | 9.4 PREDICTED: similar to FUS interacting protein (serine-arginine rich) 1 [Homo sapiens]                         |
| gi 88944399 | re                 | 1      | 7      | 23.20%  | 69       | 8329    |   |        |      |   | 9.4 PREDICTED: similar to FUS interacting protein (serine-arginine rich) 1 isoform 10 [Homo sapiens]              |
| gi 88944397 | re                 | 1      | 7      | 6.10%   | 262      | 31301   |   |        |      |   | 11.3 PREDICTED: similar to FUS-interacting serine-arginine-rich protein 1 (TLS-associated protein with Ser-Arg re |
| gi 88944395 | re                 | 1      | 7      | 23.20%  | 69       | 8329    |   |        |      |   | 9.4 PREDICTED: similar to FUS interacting protein (serine-arginine rich) 1 isoform 9 [Homo sapiens]               |
| gi 88944389 | re                 | 1      | 7      | 8.70%   | 183      | 22222   |   |        |      |   | 10.3 PREDICTED: similar to FUS interacting protein (serine-arginine rich) 1 isoform 6 [Homo sapiens]              |
| gi 88944257 | re                 | 1      | 7      | 9.20%   | 173      | 21000   |   |        |      |   | 10.5 PREDICTED: similar to FUS interacting protein (serine-arginine rich) 1 isoform 4 [Homo sapiens]              |
| gi 88944255 | re                 | 1      | 7      | 23.20%  | 69       | 8329    |   |        |      |   | 9.4 PREDICTED: similar to FUS interacting protein (serine-arginine rich) 1 isoform 3 [Homo sapiens]               |
| gi 88944253 | re                 | 1      | 7      | 23.20%  | 69       | 8329    |   |        |      |   | 9.4 PREDICTED: similar to FUS interacting protein (serine-arginine rich) 1 isoform 2 [Homo sapiens]               |
| gi 5730079  | re                 | 1      | 7      | 8.70%   | 183      | 22222   |   |        |      |   | 10.3 FUS interacting protein (serine-arginine rich) 1 isoform 1 [Homo sapiens]                                    |
|             | HsFLAG-Lin9_Ti_20  | 3.9271 | 0.2452 | 1919.5  | 1918.199 | 7294.2  | 1 | 828.5  | 53.3 | 7 | R.YGPVIVVYVPLDFYTR.R                                                                                              |
| gi 7427519  | re                 | 3      | 4      | 6.00%   | 821      | 92889   |   |        |      |   | 5.4 minichromosome maintenance protein 6 [Homo sapiens]                                                           |
| *           | HsFlag-VPS71_Ti_10 | 3.2841 | 0.3474 | 2473.11 | 2473.714 | 10771.7 | 1 | 597.9  | 37.5 | 1 | K.NLYHNLCTSLFPTIHGNDEVK.R                                                                                         |
| *           | HsFLAG-ARP6_Ti_10  | 2.6864 | 0.3828 | 1686.11 | 1686.865 | 5590    | 1 | 451.6  | 50   | 1 | R.TSILAAANPISGHYDR.S                                                                                              |
| *           | HsFlag-VPS71_Ti_10 | 4.0241 | 0.2195 | 1406.42 | 1406.486 | 7460.9  | 1 | 1105.5 | 77.3 | 2 | R.KVEEEDEESALK.R                                                                                                  |
| gi 41148718 | re                 | 2      | 3      | 6.00%   | 752      | 85887   |   |        |      |   | 7.1 PREDICTED: v-myb myeloblastosis viral oncogene homolog (avian)-like 1 isoform 1 [Homo sapiens]                |
| gi 89028677 | re                 | 2      | 3      | 6.00%   | 752      | 85887   |   |        |      |   | 7.1 PREDICTED: similar to Myb-related protein A (A-Myb) isoform 7 [Homo sapiens]                                  |
| gi 89028675 | re                 | 2      | 3      | 6.50%   | 692      | 78951   |   |        |      |   | 6.7 PREDICTED: similar to Myb-related protein A (A-Myb) isoform 12 [Homo sapiens]                                 |
| gi 89028669 | re                 | 2      | 3      | 5.90%   | 765      | 87369   |   |        |      |   | 7 PREDICTED: similar to Myb-related protein A (A-Myb) isoform 9 [Homo sapiens]                                    |

|                      |        |        |         |          |         |      |                                                                                                |
|----------------------|--------|--------|---------|----------|---------|------|------------------------------------------------------------------------------------------------|
| gi 89028072 r        | 2      | 3      | 6.50%   | 692      | 78951   | 6.7  | PREDICTED: v-myb myeloblastosis viral oncogene homolog (avian)-like 1 isoform 6 [Homo sapiens] |
| gi 89028066 r        | 2      | 3      | 5.90%   | 765      | 87369   | 7    | PREDICTED: v-myb myeloblastosis viral oncogene homolog (avian)-like 1 isoform 3 [Homo sapiens] |
| HsFLAG-Lin9_Ti_20    | 3.2949 | 0.204  | 1274.15 | 1274.425 | 7167.9  | 1    | 997.5 77.8 2 R.WHNHLNPEVK.K                                                                    |
| HsFLAG-Lin9_Ti_20    | 5.097  | 0.411  | 3958.44 | 3960.278 | 10278   | 1    | 891 24.3 1 K.TLPFSPSQFFNTCPGNEQLNIENPSFTSTPICGQK.A                                             |
| gi 32483367 r        | 3      | 4      | 6.00%   | 711      | 82254   | 7.6  | origin recognition complex, subunit 3 isoform 2 [Homo sapiens]                                 |
| gi 32483369 r        | 3      | 4      | 6.00%   | 712      | 82325   | 7.6  | origin recognition complex, subunit 3 isoform 1 [Homo sapiens]                                 |
| HsFLAG-FLJ20729_     | 3.5932 | 0.3021 | 1496.55 | 1494.731 | 8823.1  | 2    | 1127 72.7 1 K.NLFDNLIEFLQK.S                                                                   |
| HsFLAG-FLJ20729_     | 3.0419 | 0.2227 | 1937.62 | 1937.159 | 8804.2  | 1    | 949.1 56.7 1 K.NIWDSEEYASVLQLLR.M                                                              |
| HsFLAG-Lin9_Ti_20    | 4.6468 | 0.3483 | 1794.31 | 1795.091 | 9681.2  | 1    | 2183 75 2 R.IALHTALNNPYYYYLK.N                                                                 |
| gi 7706485 re        | 2      | 2      | 6.00%   | 704      | 80011   | 8    | TNF receptor-associated protein 1 [Homo sapiens]                                               |
| * HsFLAG-ARP6_Ti_1   | 3.3326 | 0.2411 | 1493.5  | 1493.746 | 5126.1  | 3    | 561 62.5 1 R.AQLLQPTLEINPR.H                                                                   |
| * HsFLAG-FLJ20729_   | 4.0957 | 0.1609 | 3070.27 | 3071.472 | 8204.2  | 1    | 1084.2 28.6 1 R.ASEPGAQLLVQDIYENAMIAAGLVDDPR.A                                                 |
| gi 4503523 re        | 2      | 2      | 6.00%   | 548      | 63973   | 6    | eukaryotic translation initiation factor 3 subunit 7 [Homo sapiens]                            |
| * HsFLAG-p53-DNA-D   | 3.6011 | 0.2037 | 1617.15 | 1615.827 | 9392.1  | 1    | 1226 65.4 1 R.IFHTVTTTDDPVIR.K                                                                 |
| * HsFlag-VPS71_Ti_1  | 4.6106 | 0.4027 | 2310.12 | 2311.543 | 6491.9  | 1    | 1017 55.6 1 R.NLAMEATYINHNSFQQCLR.M                                                            |
| gi 31543419 r        | 2      | 2      | 6.00%   | 521      | 57076   | 8.5  | polynucleotide kinase 3'-phosphatase [Homo sapiens]                                            |
| * HsFLAG-p53-DNA-D   | 3.7446 | 0.2384 | 1429.54 | 1429.746 | 8258.3  | 6    | 785.1 57.7 1 K.LLVFTAAGVKPQGK.V                                                                |
| * HsFLAG-p53-DNA-D   | 3.6294 | 0.3438 | 1842.44 | 1842.194 | 6442.9  | 1    | 886.6 62.5 1 K.LGVPFQVLVATHAGLYR.K                                                             |
| gi 7706310 re        | 2      | 2      | 6.00%   | 402      | 47620   | 10   | LUC7-like 2 [Homo sapiens]                                                                     |
| * HsFLAG-FLJ20729_   | 4.1226 | 0.4106 | 1616.59 | 1617.71  | 6165.8  | 1    | 1225.1 71.4 1 K.VEQLGAEGNVEESQK.V                                                              |
| * HsFlag-NUFIP_Ti_11 | 2.7581 | 0.1777 | 1098.7  | 1098.334 | 5512.8  | 2    | 1016.7 87.5 1 K.LHLGFIEIR.E                                                                    |
| gi 38049014 r        | 2      | 3      | 6.00%   | 402      | 45297   | 9.3  | semenogelin I isoform b preproprotein [Homo sapiens]                                           |
| gi 4506883 re        | 2      | 5      | 5.20%   | 462      | 52131   | 9.3  | semenogelin I isoform a preproprotein [Homo sapiens]                                           |
| HsFLAG-TCF3_Ti_1     | 3.4235 | 0.22   | 1502.11 | 1502.67  | 10298.3 | 8    | 625.4 54.2 1 R.LPSEFSQFPHGQK.G                                                                 |
| HsFLAG-TCF3_Ti_1     | 3.1728 | 0.2791 | 1287.48 | 1287.326 | 6987.7  | 1    | 988.4 80 2 K.ISYQSSSTEER.R                                                                     |
| gi 4557321 re        | 1      | 2      | 6.00%   | 267      | 30778   | 5.8  | apolipoprotein A-I preproprotein [Homo sapiens]                                                |
| * HsFLAG-p53-DNA-D   | 3.9653 | 0.43   | 1934.3  | 1934.113 | 6113.2  | 1    | 725.3 60 2 R.EQLGPVTQEFWDNLEK.E                                                                |
| SHUFFLED_            | 1      | 3      | 6.00%   | 251      | 28638   | 7.8  | FALSE POSITIVE                                                                                 |
| SHUFFLED_            | 1      | 3      | 6.00%   | 251      | 28638   | 7.8  | FALSE POSITIVE                                                                                 |
| HsScrap_Ti_106.262   | 3.5195 | 0.1223 | 1770.67 | 1771.968 | 7974.3  | 6    | 630.5 50 3 K.LLEDQILGVDHNNYK.E                                                                 |
| SHUFFLED_            | 1      | 3      | 6.00%   | 151      | 16311   | 11.9 | FALSE POSITIVE                                                                                 |
| SHUFFLED_            | 1      | 3      | 6.00%   | 151      | 16311   | 11.9 | FALSE POSITIVE                                                                                 |
| SHUFFLED_            | 1      | 3      | 6.00%   | 151      | 16311   | 11.9 | FALSE POSITIVE                                                                                 |
| HsScrap_Ti_104.185   | 3.0961 | 0.1878 | 1064.06 | 1063.222 | 5825.2  | 3    | 1202.7 87.5 3 R.HMQPAVSHR.P                                                                    |
| gi 32528306 r        | 4      | 4      | 5.90%   | 1147     | 128183  | 9.4  | replication factor C large subunit [Homo sapiens]                                              |
| * HsYL1_Ti_101.1800  | 4.0441 | 0.3877 | 1934.25 | 1935.009 | 6808.9  | 1    | 1092.1 61.8 1 K.ELSQNTDESGLNDEAIAK.Q                                                           |
| * HsFLAG-Lin9_Ti_20  | 3.5438 | 0.1155 | 2863.1  | 2864.188 | 4773.9  | 1    | 524.8 29 1 K.GAENCLEGLIFITGVLESIERDEAK.S                                                       |
| * HsFLAG-Lin9_Ti_20  | 3.4535 | 0.2011 | 1384.15 | 1384.616 | 10347.8 | 4    | 1288.2 72.7 1 K.IIDEDGLLNLIR.T                                                                 |
| * HsFlag-DPCD_Ti_20  | 2.0462 | 0.2963 | 1067.71 | 1067.274 | 7256.3  | 6    | 399.2 50 1 K.AALLSGPPGVGK.T                                                                    |
| gi 47519639 r        | 4      | 5      | 5.90%   | 1152     | 121005  | 5.4  | microtubule-associated protein 4 isoform 1 [Homo sapiens]                                      |
| HsFLAG-p53-DNA-D     | 3.6318 | 0.3714 | 2228.54 | 2227.43  | 11156.7 | 1    | 1202.4 50 1 R.DFIATLEAEAFDDVVGETVGK.T                                                          |
| HsFLAG-FLJ20729_     | 4.6172 | 0.4658 | 1565.11 | 1564.927 | 6477.3  | 1    | 1829 80 2 K.KPMSLASGLVPAAPPK.R                                                                 |
| HsFlag-VPS71_Ti_1    | 3.2175 | 0.2257 | 1383.5  | 1383.55  | 7359.1  | 1    | 1124.1 73.1 1 K.RASPSKPASAPASR.S                                                               |

|              |                    |        |        |         |          |                                                                              |                                                                 |        |      |    |                                   |  |
|--------------|--------------------|--------|--------|---------|----------|------------------------------------------------------------------------------|-----------------------------------------------------------------|--------|------|----|-----------------------------------|--|
|              | HsFLAG-p53-DNA-D   | 3.3931 | 0.2771 | 1591.49 | 1591.808 | 7520                                                                         | 1                                                               | 838.5  | 53.1 | 1  | K.VGSLDNVGHLPAGGAVK.T             |  |
| gij 32698714 | 4                  | 7      | 5.90%  | 1105    | 120966   | 8.7 hypothetical protein LOC284058 [Homo sapiens]                            |                                                                 |        |      |    |                                   |  |
| *            | HsFLAG-FLJ20436_   | 2.8837 | 0.36   | 1710.37 | 1709.894 | 6882.6                                                                       | 1                                                               | 670.3  | 53.3 | 1  | K.SPLSSILFSALDSDTR.I              |  |
| *            | HsFLAG-FLJ20436_   | 3.9256 | 0.4441 | 1656.92 | 1656.787 | 7290.3                                                                       | 1                                                               | 1021.1 | 60   | 3  | K.AASETTTSEGLSNFLK.S              |  |
| *            | HsFLAG-FLJ20436_   | 4.1325 | 0.4583 | 1637.38 | 1637.753 | 5374.5                                                                       | 1                                                               | 1244.8 | 73.3 | 1  | R.LNLVSSSDGTCVAAR.T               |  |
| *            | HsFLAG-FLJ20436_   | 3.1738 | 0.4116 | 1773.47 | 1773.042 | 7191                                                                         | 1                                                               | 767    | 53.1 | 2  | R.SPISPELHSAPLTPVAR.D             |  |
| gij 21264343 | 3                  | 5      | 5.90%  | 915     | 102642   | 5.5 scaffold attachment factor B [Homo sapiens]                              |                                                                 |        |      |    |                                   |  |
|              | HsFLAG-Lin9_Ti_20  | 3.5115 | 0.2398 | 2976.68 | 2978.153 | 10104.6                                                                      | 1                                                               | 918.5  | 26.9 | 1  | K.SEPVKEESSELEQPFAQDTSSVGPDRK.L   |  |
|              | HsFlag-NUFIP_Ti_20 | 3.7156 | 0.2993 | 1736    | 1735.9   | 7129.6                                                                       | 1                                                               | 813.8  | 57.1 | 2  | R.KFDFDACNEVPPAPK.E               |  |
| *            | HsFLAG-p53-DNA-D   | 3.8017 | 0.2853 | 1355.55 | 1355.493 | 7409.5                                                                       | 1                                                               | 1541.5 | 77.3 | 2  | R.NFWVSGLSSTTR.A                  |  |
| gij 24234690 | 3                  | 4      | 5.90%  | 680     | 77642    | 5.8 meiotic recombination 11 homolog A isoform 2 [Homo sapiens]              |                                                                 |        |      |    |                                   |  |
| gij 5031923  | re                 | 3      | 4      | 5.60%   | 708      | 80593                                                                        | 5.9 meiotic recombination 11 homolog A isoform 1 [Homo sapiens] |        |      |    |                                   |  |
|              | HsARP6-FLAG_Ti_1   | 4.2987 | 0.2811 | 1494.16 | 1493.657 | 7544.6                                                                       | 1                                                               | 1921.3 | 83.3 | 1  | R.GNDTFVTLDEILR.L                 |  |
|              | HsARP6-FLAG_Ti_1   | 3.6193 | 0.3605 | 1404.57 | 1404.606 | 7512.4                                                                       | 1                                                               | 1462.8 | 70.8 | 2  | K.IALYGLGSPIDER.L                 |  |
|              | HsARP6-FLAG_Ti_1   | 4.0672 | 0.3421 | 1573.12 | 1573.745 | 5891.3                                                                       | 1                                                               | 1195.9 | 73.1 | 1  | R.VDYSGGFEPFSVLR.F                |  |
| gij 21614525 | 2                  | 5      | 5.90%  | 556     | 62412    | 6.7 glypican 4 [Homo sapiens]                                                |                                                                 |        |      |    |                                   |  |
| *            | HsFLAG-ARP6_Ti_1   | 4.6057 | 0.4227 | 1933.42 | 1933.097 | 11076.3                                                                      | 1                                                               | 1446.8 | 56.2 | 1  | K.SVVSEQC�NHLQAVFASR.Y            |  |
| *            | HsFLAG-ARP6_Ti_1   | 3.4842 | 0.3781 | 1737.93 | 1738.991 | 4184.1                                                                       | 1                                                               | 683.8  | 63.3 | 4  | K.VSVVNPTAQCTHALLK.M              |  |
| gij 24430160 | 2                  | 2      | 5.90%  | 389     | 44173    | 7.5 proteasome 26S ATPase subunit 6 [Homo sapiens]                           |                                                                 |        |      |    |                                   |  |
| *            | HsFlag-VPS71_Ti_1  | 2.5804 | 0.2099 | 1799.77 | 1799.077 | 4565.6                                                                       | 2                                                               | 365.1  | 53.6 | 1  | R.EVIELPLTNPELFQR.V               |  |
| *            | HsFlag-VPS71_Ti_1  | 2.0579 | 0.2085 | 836.56  | 837.01   | 5020                                                                         | 3                                                               | 573.3  | 78.6 | 1  | K.IHAGPITK.H                      |  |
| gij 6005721  | re                 | 2      | 3      | 5.90%   | 339      | 37840                                                                        | 5.6 SPFH domain family, member 2 isoform 1 [Homo sapiens]       |        |      |    |                                   |  |
| *            | HsFLAG-ARP6_Ti_1   | 5.5529 | 0.4365 | 2125.15 | 2125.535 | 4892.4                                                                       | 1                                                               | 1190   | 65.8 | 2  | K.LALQQDLTSMAPGLVIQAVR.V          |  |
| *            | HsFLAG-ARP6_Ti_1   | 3.9851 | 0.2572 | 2125.66 | 2125.535 | 7420.5                                                                       | 3                                                               | 1080.3 | 35.5 | 1  | K.LALQQDLTSMAPGLVIQAVR.V          |  |
| gij 13124875 | 7                  | 24     | 5.80%  | 1938    | 223575   | 5.5 smooth muscle myosin heavy chain 11 isoform SM2 [Homo sapiens]           |                                                                 |        |      |    |                                   |  |
| gij 13124879 | 7                  | 24     | 5.70%  | 1972    | 227337   | 5.5 smooth muscle myosin heavy chain 11 isoform SM1 [Homo sapiens]           |                                                                 |        |      |    |                                   |  |
|              | HsFLAG-Lin9_Ti_20  | 3.8076 | 0.3868 | 2125.48 | 2126.205 | 8110.7                                                                       | 1                                                               | 708    | 44.7 | 1  | R.EDQSILCTGESGAGKTENTK.K          |  |
|              | HsFLAG-ARP6_Ti_1   | 4.8327 | 0.3425 | 2373.85 | 2373.708 | 5896                                                                         | 1                                                               | 1097.7 | 55   | 5  | R.INFDVTGYIVGANIETYLLEK.S         |  |
|              | HsFLAG-ARP6_Ti_1   | 2.7773 | 0.2777 | 1592.1  | 1592.678 | 3561.8                                                                       | 1                                                               | 582.7  | 64.3 | 2  | R.NTDQASMPDNAAQK.V                |  |
|              | HsFLAG-ARP6_Ti_1   | 3.9279 | 0.1225 | 2468.62 | 2468.789 | 8469.2                                                                       | 1                                                               | 1635.8 | 41.7 | 1  | K.LQQLFNHTMFILEQEEYQR.E           |  |
|              | HsFLAG-ARP6_Ti_1   | 3.1298 | 0.1302 | 1258.36 | 1258.417 | 6831.5                                                                       | 4                                                               | 1016.2 | 80   | 1  | K.KEEELQAALAR.L                   |  |
|              | HsFLAG-Lin9_Ti_20  | 3.416  | 0.1163 | 1220.85 | 1221.396 | 6427.8                                                                       | 2                                                               | 1186.2 | 83.3 | 2  | R.KFDQLLAEEK.N                    |  |
|              | HsFLAG-ARP6_Ti_1   | 6.8581 | 0.5173 | 1962.21 | 1963.059 | 10191.7                                                                      | 1                                                               | 3429.4 | 81.2 | 12 | K.TQLEEELEDELQATEDAK.L            |  |
| gij 19913418 | 3                  | 8      | 5.80%  | 831     | 95756    | 6.7 ATPase, H+ transporting, lysosomal V0 subunit a isoform 1 [Homo sapiens] |                                                                 |        |      |    |                                   |  |
| *            | HsFLAG-ARP6_Ti_1   | 3.5701 | 0.3179 | 1998.09 | 1998.261 | 9713.3                                                                       | 1                                                               | 1082.5 | 52.9 | 1  | K.ANIPIMDTGENPEVPFPR.D            |  |
| *            | HsFLAG-ARP6_Ti_1   | 3.3582 | 0.2747 | 2051.49 | 2052.304 | 10598.2                                                                      | 1                                                               | 949.4  | 53.1 | 2  | R.DMIDLEANFEKIENELK.E             |  |
| *            | HsFLAG-ARP6_Ti_1   | 4.254  | 0.1953 | 1543.21 | 1542.818 | 5931.4                                                                       | 1                                                               | 1768.4 | 83.3 | 5  | K.SVFIIFFGDQLK.N                  |  |
| gij 31543212 | 3                  | 14     | 5.80%  | 711     | 80320    | 7.7 macrophage stimulating 1 (hepatocyte growth factor-like) [Homo sapiens]  |                                                                 |        |      |    |                                   |  |
| *            | HsSrcap_Ti_205.385 | 5.9827 | 0.473  | 3183.8  | 3186.431 | 4730.2                                                                       | 1                                                               | 1179   | 36.6 | 6  | R.GTELQHLLHAVVPGPWQEDVADAEECAGR.C |  |
| *            | HsSrcap_Ti_204.371 | 4.9719 | 0.4357 | 3183.97 | 3186.431 | 4682.6                                                                       | 1                                                               | 566.3  | 39.3 | 6  | R.GTELQHLLHAVVPGPWQEDVADAEECAGR.C |  |
| *            | HsSrcap_Ti_202.204 | 4.3913 | 0.344  | 1516.56 | 1516.573 | 7178.4                                                                       | 1                                                               | 1804.2 | 86.4 | 2  | K.FLDQGLDDNYCR.N                  |  |
| gij 9910242  | re                 | 2      | 2      | 5.80%   | 483      | 55816                                                                        | 4.9 hypothetical protein LOC57003 [Homo sapiens]                |        |      |    |                                   |  |
| *            | HsFLAG-ARP6_Ti_1   | 2.5603 | 0.2352 | 1243.49 | 1244.398 | 6658.3                                                                       | 1                                                               | 752.1  | 72.2 | 1  | R.LAQAWFNTHR.E                    |  |

|             |                    |        |        |         |          |         |   |        |      |   |                                                                                  |
|-------------|--------------------|--------|--------|---------|----------|---------|---|--------|------|---|----------------------------------------------------------------------------------|
| *           | HsSrcap_Ti_206.273 | 3.2253 | 0.2696 | 2014.1  | 2013.304 | 7851.1  | 1 | 613.1  | 47.1 | 1 | K.RTLTFTFNVPQSGNTYPK.D                                                           |
| gi 45006986 |                    | 1      | 3      | 5.80%   | 312      | 34353   |   |        |      |   | 8.4 small inducible cytokine subfamily E, member 1 [Homo sapiens]                |
| *           | HsFLAG-p53-DNA-D   | 3.8684 | 0.4326 | 2021.31 | 2022.33  | 7107.3  | 1 | 602    | 47.1 | 3 | R.TVVSGLVNHVPLEQMQNR.M                                                           |
| gi 44681484 |                    | 2      | 3      | 5.70%   | 1023     | 112676  |   |        |      |   | 8.4 cell division cycle associated 2 [Homo sapiens]                              |
| *           | HsYL1_Ti_101.2084. | 4.3674 | 0.4552 | 2653.81 | 2653.748 | 4293.4  | 1 | 454    | 41.7 | 1 | K.SSSSLGNATSDDEDPTNTNIMNINENK.N                                                  |
| *           | HsYL1_Ti_103.2436. | 5.2382 | 0.4169 | 3569.08 | 3569.876 | 8823.6  | 1 | 1445.9 | 28.1 | 2 | R.VASDSPKPALTLQQGQEFSSAGGQNAENLCQFFK.I                                           |
| gi 4504205  |                    | re 2   | 2      | 5.70%   | 911      | 100680  |   |        |      |   | 7.3 general transcription factor IIIC, polypeptide 2, beta 110kDa [Homo sapiens] |
| *           | HsFlag-DPCD_Ti_20  | 4.6185 | 0.3029 | 3266.25 | 3267.71  | 7163.5  | 1 | 1092.4 | 30.8 | 1 | R.AAQVALLYLQELAEELSTALPAPVSCPEGPK.V                                              |
| *           | HsFLAG-Lin9_Ti_20  | 4.3978 | 0.3659 | 2240.6  | 2240.48  | 8611.6  | 1 | 847.7  | 45   | 1 | R.FSPNLDSYGWLVSQGGQSGLV.R.I                                                      |
| gi 4506583  |                    | re 2   | 5      | 5.70%   | 616      | 68138   |   |        |      |   | 7.2 replication protein A1, 70kDa [Homo sapiens]                                 |
| *           | HsFLAG-p53-DNA-D   | 3.6488 | 0.4349 | 1486.68 | 1486.582 | 7212.2  | 1 | 939.2  | 60   | 1 | K.AAGPSLSHTSGGTQSK.V                                                             |
| *           | HsFLAG-p53-DNA-D   | 5.1414 | 0.304  | 2009.42 | 2009.18  | 9435.8  | 1 | 2075   | 63.9 | 4 | R.GWFDAEGQALDGVISDLK.S                                                           |
| gi 30795212 |                    | re 2   | 3      | 5.70%   | 579      | 63705   |   |        |      |   | 8.9 insulin-like growth factor 2 mRNA binding protein 3 [Homo sapiens]           |
| *           | HsFlag-NUFIP_Ti_10 | 3.081  | 0.191  | 2183.25 | 2182.435 | 5984.7  | 1 | 425.2  | 39.5 | 1 | K.LYIGNLSENAAPSDLESIFK.D                                                         |
| *           | HsFLAG-ARP6_Ti_1   | 2.7964 | 0.1003 | 1487.18 | 1487.563 | 4697.2  | 1 | 1064.7 | 75   | 2 | R.DQTPDENDQVVVK.I                                                                |
| gi 41146847 |                    | re 2   | 2      | 5.70%   | 581      | 62543   |   |        |      |   | 9.4 PREDICTED: hypothetical protein LOC57606 isoform 1 [Homo sapiens]            |
| gi 88979579 |                    | re 2   | 2      | 7.00%   | 469      | 51384   |   |        |      |   | 8.8 PREDICTED: hypothetical protein LOC57606 isoform 9 [Homo sapiens]            |
| gi 88979572 |                    | re 2   | 2      | 5.70%   | 581      | 62543   |   |        |      |   | 9.4 PREDICTED: hypothetical protein LOC57606 isoform 6 [Homo sapiens]            |
| gi 88974131 |                    | re 2   | 2      | 7.00%   | 469      | 51384   |   |        |      |   | 8.8 PREDICTED: hypothetical protein LOC57606 isoform 3 [Homo sapiens]            |
|             | HsFLAG-FLJ20309_   | 2.9673 | 0.2414 | 2057.61 | 2057.177 | 9627.5  | 1 | 818.1  | 50   | 1 | R.LSGWEEEEESWLYSSPK.K                                                            |
|             | HsFlag-DPCD_Ti_20  | 3.5811 | 0.3664 | 1738.38 | 1738.938 | 5903.9  | 5 | 352.4  | 43.3 | 1 | R.LSLQGHPTDLQTSNVK.N                                                             |
| gi 4507947  |                    | re 2   | 3      | 5.70%   | 528      | 59144   |   |        |      |   | 7 tyrosyl-tRNA synthetase [Homo sapiens]                                         |
| *           | HsFLAG-p53-DNA-D   | 3.7855 | 0.343  | 2044.86 | 2045.343 | 6192.6  | 1 | 661    | 52.9 | 2 | R.TVVSGLVQFVPKEELQDR.L                                                           |
| *           | HsFLAG-ARP6_Ti_1   | 3.6027 | 0.3188 | 1411.5  | 1411.737 | 8842.8  | 1 | 1615   | 81.8 | 1 | R.LVVVLCNLKPQK.M                                                                 |
| gi 40255127 |                    | re 2   | 3      | 5.70%   | 522      | 58510   |   |        |      |   | 4.6 hypothetical protein LOC166968 [Homo sapiens]                                |
| *           | HsH2AZ-FLAG_293_   | 3.4997 | 0.3724 | 2336.62 | 2337.554 | 4892.9  | 1 | 535.2  | 47.2 | 1 | K.VYENEDQLLWCPDVVLESK.V                                                          |
| *           | HsH2AZ-FLAG_293_   | 4.1209 | 0.1977 | 1338.74 | 1336.485 | 6458.7  | 2 | 1095.4 | 80   | 2 | R.DNEQALYELLK.C                                                                  |
| gi 68303639 |                    | re 2   | 2      | 5.70%   | 509      | 54365   |   |        |      |   | 8.7 CUG triplet repeat, RNA binding protein 2 isoform 2 [Homo sapiens]           |
| gi 68303647 |                    | re 2   | 2      | 5.70%   | 508      | 54285   |   |        |      |   | 8.8 CUG triplet repeat, RNA binding protein 2 isoform 3 [Homo sapiens]           |
| gi 68303645 |                    | re 2   | 2      | 5.90%   | 490      | 52268   |   |        |      |   | 8.6 CUG triplet repeat, RNA binding protein 2 isoform 1 [Homo sapiens]           |
|             | HsFLAG-p53-DNA-D   | 3.9234 | 0.3119 | 1913.63 | 1912.196 | 6578.1  | 1 | 962.7  | 63.3 | 1 | K.ELFEPYGAVYQINVL.R.D                                                            |
|             | HsFLAG-Lin9_Ti_20  | 3.1875 | 0.1983 | 1393.06 | 1393.586 | 11480.5 | 1 | 1312.4 | 66.7 | 1 | K.AALEAQNALHNIK.T                                                                |
| gi 22095347 |                    | re 1   | 2      | 5.70%   | 442      | 48537   |   |        |      |   | 5.1 immunoglobulin superfamily, member 4 [Homo sapiens]                          |
| *           | HsFLAG-ARP6_Ti_1   | 4.6532 | 0.4139 | 2476.23 | 2477.471 | 7658.2  | 1 | 1198.6 | 47.9 | 2 | K.GADDAADADTAIINAEGGQNNSEEK.K                                                    |
| gi 11125772 |                    | re 1   | 4      | 5.70%   | 332      | 31545   |   |        |      |   | 4.4 myristoylated alanine-rich protein kinase C substrate [Homo sapiens]         |
| *           | HsFLAG-ARP6_Ti_1   | 4.6834 | 0.3466 | 1786.44 | 1785.908 | 7488.6  | 1 | 1089.1 | 55.6 | 4 | K.GEAAAERPGEAAVASSPSK.A                                                          |
| gi 15431303 |                    | re 1   | 2      | 5.70%   | 192      | 21863   |   |        |      |   | 10 ribosomal protein L9 [Homo sapiens]                                           |
| gi 89039140 |                    | re 1   | 2      | 5.30%   | 207      | 23369   |   |        |      |   | 11.1 PREDICTED: similar to ribosomal protein L9 [Homo sapiens]                   |
| gi 89038445 |                    | re 1   | 2      | 5.30%   | 207      | 23369   |   |        |      |   | 11.1 PREDICTED: similar to ribosomal protein L9 [Homo sapiens]                   |
| gi 67944630 |                    | re 1   | 2      | 5.70%   | 192      | 21863   |   |        |      |   | 10 ribosomal protein L9 [Homo sapiens]                                           |
|             | HsFLAG-ARP6_Ti_1   | 3.2022 | 0.2214 | 1331.19 | 1331.539 | 7406.1  | 1 | 828    | 65   | 2 | R.TICSHVQNMNIK.G                                                                 |
| gi 5032189  |                    | re 5   | 7      | 5.60%   | 1972     | 213573  |   |        |      |   | 4.7 tumor protein p53 binding protein, 1 [Homo sapiens]                          |
| *           | HsFLAG-p53-DNA-D   | 3.3547 | 0.2973 | 1733.54 | 1734.006 | 6130.4  | 1 | 612.6  | 56.7 | 1 | K.DIPVTAQPSKDVHVVK.E                                                             |

|                |                    |        |        |         |          |         |   |                                                                             |      |   |                                          |
|----------------|--------------------|--------|--------|---------|----------|---------|---|-----------------------------------------------------------------------------|------|---|------------------------------------------|
| *              | HsFlag-VPS71_Ti_10 | 4.4474 | 0.3338 | 3762.42 | 3762.999 | 6593.8  | 1 | 1157.6                                                                      | 27.9 | 2 | K.TVSSDGCSTPSREEGGCSLASTPATTLHLLQLSGQR.S |
| *              | HsFLAG-p53-DNA-D   | 3.571  | 0.3801 | 2039.88 | 2040.411 | 4447.1  | 4 | 259.7                                                                       | 42.1 | 1 | K.EGDIIPPLTGATPPLIGHLK.L                 |
| *              | HsFlag-VPS71_Ti_10 | 3.6517 | 0.4284 | 1669.5  | 1669.761 | 6216.1  | 1 | 967                                                                         | 55.9 | 1 | R.TSSGTSLSAMHSSGSSGK.G                   |
| *              | HsFLAG-ARP6_Ti_2   | 4.0568 | 0.4384 | 2024.35 | 2024.106 | 4327    | 1 | 557.6                                                                       | 50   | 2 | R.SNVSSPATPTASSSSSTTPTR.K                |
| gij 42734325 r |                    | 4      | 7      | 5.60%   | 1190     | 132945  |   | 5.4 KIAA0261 [Homo sapiens]                                                 |      |   |                                          |
| *              | HsYL1_Ti_101.1439. | 3.5603 | 0.1933 | 1438.37 | 1438.497 | 5547    | 1 | 1039.3                                                                      | 75   | 2 | R.IVEDDASISSCNK.L                        |
| *              | HsYL1_Ti_103.1786. | 3.9093 | 0.2374 | 2305.25 | 2305.593 | 5021.7  | 1 | 682.5                                                                       | 52.6 | 2 | R.VLESVTVHNPENQSYLIAYK.D                 |
| *              | HsARP6-FLAG_Ti_10  | 3.5387 | 0.3322 | 1730.15 | 1731.089 | 7947.2  | 1 | 801.7                                                                       | 53.3 | 1 | R.VLGLGLLINLVEYSAR.N                     |
| *              | HsYL1_Ti_106.3060. | 4.5221 | 0.4122 | 1979.95 | 1979.333 | 7673.5  | 1 | 1626.9                                                                      | 61.8 | 2 | R.IGGQVHAVQALVQLFLER.E                   |
| gij 40255237 r |                    | 4      | 6      | 5.60%   | 1156     | 132195  |   | 6.8 leucine zipper protein 5 [Homo sapiens]                                 |      |   |                                          |
| *              | HsYL1_Ti_102.3671. | 3.2728 | 0.3106 | 1936.8  | 1936.083 | 7552.2  | 1 | 1078.7                                                                      | 56.2 | 2 | K.EASDPFSLNELLELSR.K                     |
| *              | HsYL1_Ti_106.2638. | 3.3136 | 0.222  | 1601.48 | 1600.945 | 4579.1  | 1 | 654                                                                         | 65.4 | 1 | K.LSHPLLEQLPALR.Y                        |
| *              | HsFlag-VPS71_Ti_10 | 2.7284 | 0.2374 | 1582.88 | 1582.797 | 6533.6  | 2 | 719.2                                                                       | 57.1 | 1 | K.ADLESLLQTPGGKPR.G                      |
| *              | HsYL1_Ti_105.3199. | 3.7152 | 0.4142 | 1990.41 | 1990.354 | 3766.3  | 1 | 576.1                                                                       | 50   | 2 | R.GVLSTLIAGPVVEISHQLR.K                  |
| gij 6912398 re |                    | 3      | 3      | 5.60%   | 886      | 101272  |   | 5.1 general transcription factor IIIC, polypeptide 3, 102kDa [Homo sapiens] |      |   |                                          |
| *              | HsFLAG-FLJ20309_   | 2.9693 | 0.3278 | 2350.95 | 2351.529 | 7267.6  | 1 | 269                                                                         | 32.5 | 1 | K.SYYEANDVTSAINIIDEAFSK.H                |
| *              | HsFLAG-Lin9_Ti_20  | 3.8912 | 0.1866 | 1671.79 | 1670.904 | 7624.7  | 1 | 1037.7                                                                      | 64.3 | 1 | R.ISLSTLQQQLGQPEK.A                      |
| *              | HsFLAG-FLJ20309_   | 2.9788 | 0.3022 | 1572.01 | 1569.795 | 9761.5  | 1 | 936.1                                                                       | 61.5 | 1 | K.ELEYFGLSAAILD.K                        |
| gij 13375885 r |                    | 2      | 2      | 5.60%   | 641      | 71086   |   | 6.5 chromosome 14 open reading frame 169 [Homo sapiens]                     |      |   |                                          |
| *              | HsFlag-NUFIP_Ti_20 | 3.4589 | 0.3768 | 1496.06 | 1496.666 | 8495.3  | 1 | 892.9                                                                       | 61.5 | 1 | R.LGHFAPVDAVADQR.A                       |
| *              | HsFLAG-TCF3_Ti_10  | 3.5491 | 0.3115 | 2442.95 | 2440.63  | 9191.4  | 1 | 642.3                                                                       | 38.1 | 1 | R.VGDLPCDSVEDQLSLATTLYDK.G               |
| gij 24497620 r |                    | 2      | 2      | 5.60%   | 627      | 70730   |   | 8.6 signal recognition particle 68kDa [Homo sapiens]                        |      |   |                                          |
| *              | HsFlag-VPS71_Ti_10 | 4.5686 | 0.2269 | 2570.12 | 2569.998 | 6560.3  | 1 | 1031.1                                                                      | 52.4 | 1 | R.LYDIIQLNLVELLQLPGLLEEDK.A              |
| *              | HsFLAG-FLJ20729_   | 4.125  | 0.2632 | 1526.27 | 1526.73  | 4893    | 1 | 774.8                                                                       | 70.8 | 1 | K.DLPDVQELITQVR.S                        |
| gij 21361499 r |                    | 3      | 4      | 5.60%   | 574      | 65010   |   | 8.6 SUMO1/sentrin/SMT3 specific protease 3 [Homo sapiens]                   |      |   |                                          |
| *              | HsH2AZ-FLAG_293_   | 4.1173 | 0.2692 | 1418.79 | 1418.679 | 8556.2  | 1 | 1462.4                                                                      | 72.7 | 2 | K.GLVLQLIQSYQR.M                         |
| *              | HsH2AZ-FLAG_293_   | 3.0551 | 0.3286 | 1451.45 | 1451.624 | 3462.7  | 1 | 539.3                                                                       | 80   | 1 | K.VHFFNSFFYDK.L                          |
| *              | HsH2AZ-FLAG_293_   | 2.618  | 0.1605 | 1049.98 | 1050.243 | 4706.1  | 4 | 929.5                                                                       | 93.8 | 1 | K.YLQAEAVKK.D                            |
| gij 34485722 r |                    | 1      | 2      | 5.60%   | 521      | 57811   |   | 4.9 karyopherin alpha 3 [Homo sapiens]                                      |      |   |                                          |
| *              | HsFLAG-Lin9_Ti_20  | 5.2136 | 0.4039 | 3023.8  | 3023.373 | 10436.9 | 1 | 1983.9                                                                      | 33.9 | 2 | K.AQNVTLLEAILQNATSDNPVVQLSAVQAAR.K       |
| gij 13399296 r |                    | 2      | 2      | 5.60%   | 497      | 51067   |   | 9.3 MYC-associated zinc finger protein [Homo sapiens]                       |      |   |                                          |
| *              | HsFLAG-p53-DNA-D   | 3.4864 | 0.3053 | 1552.3  | 1552.693 | 4277.8  | 1 | 618.9                                                                       | 70.8 | 1 | K.SFSRPDHLNLSHVR.Q                       |
| *              | HsFLAG-FLJ20729_   | 3.2649 | 0.3871 | 1804.07 | 1802.92  | 8792.6  | 1 | 1253.4                                                                      | 67.9 | 1 | K.VHSQGP HHVCELCKN.K                     |
| gij 38044290 r |                    | 2      | 2      | 5.50%   | 707      | 78577   |   | 4.9 zinc finger, CCHC domain containing 8 [Homo sapiens]                    |      |   |                                          |
| *              | HsFLAG-ARP6_Ti_10  | 3.1344 | 0.2856 | 2262.4  | 2263.555 | 8241    | 1 | 428.6                                                                       | 39.5 | 1 | K.LGQPLL NENPQLSEGWEIPK.Y                |
| *              | HsFLAG-ARP6_Ti_10  | 3.0552 | 0.2771 | 2047.42 | 2047.313 | 7057    | 1 | 626.5                                                                       | 52.8 | 1 | R.FKPGVISEELQDALGVTDK.S                  |
| gij 5454096 re |                    | 2      | 3      | 5.50%   | 487      | 55630   |   | 5.1 serine/threonine kinase 4 [Homo sapiens]                                |      |   |                                          |
| *              | HsARP6-FLAG_Ti_10  | 3.132  | 0.106  | 1338.68 | 1338.506 | 7770.6  | 1 | 992.6                                                                       | 66.7 | 2 | K.AGNILLNTEGHAK.L                        |
| *              | HsFLAG-ARP6_Ti_10  | 3.0064 | 0.1605 | 1727    | 1726.926 | 10660.3 | 1 | 1092.4                                                                      | 61.5 | 1 | R.KPELWSDNFTDFVK.Q                       |
| gij 4506783 re |                    | 1      | 2      | 5.50%   | 220      | 23306   |   | 9.2 sin3 associated polypeptide p30 [Homo sapiens]                          |      |   |                                          |
| *              | HsScrap_Ti_205.233 | 3.7674 | 0.3593 | 1431.22 | 1429.628 | 7400.6  | 1 | 1302.7                                                                      | 77.3 | 2 | K.AQLVEIVGCHFR.S                         |
| gij 6382079 re |                    | 12     | 28     | 5.40%   | 3224     | 358173  |   | 6.2 RAN binding protein 2 [Homo sapiens]                                    |      |   |                                          |
| *              | HsScrap_Ti_102.299 | 3.205  | 0.3291 | 1566.41 | 1565.764 | 6188.2  | 1 | 497.4                                                                       | 53.8 | 2 | R.ELLQSFDLSALQSVK.S                      |

|                |                    |        |        |         |          |        |                                                                     |        |      |                                     |
|----------------|--------------------|--------|--------|---------|----------|--------|---------------------------------------------------------------------|--------|------|-------------------------------------|
|                | HsFlag-VPS71_Ti_10 | 3.2897 | 0.217  | 1788.65 | 1786.936 | 8271.5 | 1                                                                   | 833.8  | 50   | 1 K.SGQSALYDALFSSQSPK.D             |
|                | HsScrap_Ti_105.186 | 2.7444 | 0.1612 | 1335.54 | 1336.577 | 4894.7 | 1                                                                   | 431.7  | 70   | 1 R.LLVQHEINTLR.A                   |
|                | HsFlag-VPS71_Ti_10 | 3.2882 | 0.2649 | 1336.77 | 1336.577 | 5684.3 | 1                                                                   | 918.2  | 80   | 2 R.LLVQHEINTLR.A                   |
|                | HsFlag-VPS71_Ti_10 | 3.1041 | 0.1631 | 2433.63 | 2433.707 | 8189.6 | 1                                                                   | 636.7  | 42.5 | 1 K.EMLNSVMQELEDYSEGGPLYK.N         |
| *              | HsFLAG-p53-DNA-D   | 5.5017 | 0.4409 | 2599.31 | 2599.949 | 8321.2 | 1                                                                   | 2317.6 | 45.2 | 4 R.SFVWHALDYADELPKPEQLAIR.F        |
| *              | HsFLAG-FLJ20729_   | 3.354  | 0.2935 | 1487.23 | 1487.674 | 6085.9 | 1                                                                   | 569.3  | 57.1 | 1 K.APGTNVAMASNQAVR.I               |
| *              | HsScrap_Ti_102.282 | 2.8716 | 0.3191 | 1598.82 | 1598.88  | 6280.7 | 1                                                                   | 727.9  | 57.1 | 2 K.ELVGPPLAETVFTPK.T               |
|                | HsFlag-VPS71_Ti_10 | 3.9782 | 0.4272 | 1824.48 | 1824.896 | 6290.8 | 1                                                                   | 725    | 55.9 | 10 K.QNQTTSAVSTPASSETSK.A           |
| *              | HsFlag-VPS71_Ti_10 | 4.7874 | 0.3993 | 2097.63 | 2096.301 | 3756   | 1                                                                   | 754.7  | 67.6 | 1 K.NLFASFPTTESSINYTFK.T            |
| *              | HsScrap_Ti_104.236 | 2.5791 | 0.2153 | 1172.42 | 1173.363 | 7167.8 | 3                                                                   | 607.7  | 62.5 | 2 K.LPPTFFCYK.N                     |
| *              | HsFlag-VPS71_Ti_10 | 3.4329 | 0.2266 | 1576.52 | 1576.626 | 9244.2 | 1                                                                   | 1084.4 | 70.8 | 1 K.CRPLEENTADNEK.E                 |
| gij 31621305 r | 5                  | 9      | 5.40%  | 1394    | 157904   | 6.1    | leucine-rich PPR motif-containing protein [Homo sapiens]            |        |      |                                     |
| *              | HsFLAG-ARP6_Ti_10  | 4.3896 | 0.3991 | 1664.38 | 1663.914 | 6720   | 1                                                                   | 1275.8 | 67.9 | 1 K.LGAVYDVSHYNALLK.V               |
| *              | HsFLAG-ARP6_Ti_10  | 2.6951 | 0.2783 | 1726.68 | 1725.939 | 8871.7 | 1                                                                   | 754.9  | 50   | 1 R.SEAANGNLDFVLSFLK.S              |
| *              | HsFLAG-ARP6_Ti_10  | 4.0353 | 0.3812 | 2323.4  | 2324.462 | 4056.9 | 1                                                                   | 426.1  | 50   | 2 R.EGNQVEVPFDVPELWYEDEK.H          |
| *              | HsFlag-FLJ90652_29 | 2.6785 | 0.1293 | 1273.53 | 1273.389 | 9439.9 | 7                                                                   | 795.2  | 65   | 1 K.TVLDQQQTPSR.L                   |
| *              | HsFLAG-p53-DNA-D   | 3.6668 | 0.4312 | 1717.49 | 1717.02  | 5680.1 | 1                                                                   | 923.7  | 73.1 | 4 K.VIEPQYFGLAYLFR.K                |
| gij 31563531 r | 4                  | 11     | 5.40%  | 1231    | 141326   | 5.4    | stromal antigen 2 [Homo sapiens]                                    |        |      |                                     |
| *              | HsFlag-VPS71_Ti_10 | 4.6495 | 0.2924 | 2126.78 | 2128.405 | 8245.6 | 1                                                                   | 1386.3 | 58.8 | 1 R.DIALLDLINFQICSGCK.G             |
|                | HsFlag-VPS71_Ti_10 | 1.8636 | 0.2099 | 959.5   | 960.136  | 5058.6 | 1                                                                   | 424.4  | 68.8 | 1 R.HTSTLAAMK.L                     |
| *              | HsFLAG-p53-DNA-D   | 3.9436 | 0.37   | 1628.6  | 1628.008 | 7406.5 | 1                                                                   | 1491   | 71.4 | 8 K.ITELFAVALPQLLAK.Y               |
| *              | HsARP6-FLAG_Ti_10  | 3.9846 | 0.4182 | 2899.1  | 2898.103 | 7970.8 | 1                                                                   | 685.9  | 28.1 | 1 R.LLEDFLQEGEEPDEDDAYQVLSTLK.R     |
| gij 14149627 r | 2                  | 3      | 5.40%  | 952     | 109297   | 5.2    | ubiquitin specific protease 15 [Homo sapiens]                       |        |      |                                     |
| *              | HsFlag-VPS71_Ti_10 | 4.7632 | 0.4534 | 3552.82 | 3554.863 | 4299   | 1                                                                   | 583.1  | 30.2 | 1 R.FAPQFSGYQQDCQELLAFLLDGLHEDLNR.I |
| *              | HsFLAG-FLJ20729_   | 3.7664 | 0.3477 | 2142.55 | 2143.452 | 9105.4 | 1                                                                   | 1123.2 | 50   | 2 K.IGNILDCTALSALSGIPADK.M          |
| gij 6631095 re | 3                  | 4      | 5.40%  | 808     | 90981    | 5.8    | minichromosome maintenance protein 3 [Homo sapiens]                 |        |      |                                     |
| *              | HsFLAG-ARP6_Ti_10  | 3.8657 | 0.2922 | 2192.81 | 2194.27  | 7442.1 | 1                                                                   | 1119   | 58.8 | 1 R.DYLDLDFDEEDQGIYQSK.V            |
| *              | HsFLAG-p53-DNA-D   | 2.5107 | 0.1223 | 1062.42 | 1063.164 | 6285.8 | 5                                                                   | 468.4  | 62.5 | 2 R.SVHYCPATK.K                     |
| *              | HsFLAG-ARP6_Ti_10  | 4.0064 | 0.4244 | 1837.8  | 1837.978 | 6578.2 | 1                                                                   | 946.8  | 62.5 | 1 R.DSEEPFSSVEIQAALSK.M             |
| gij 38683855 r | 3                  | 5      | 5.40%  | 689     | 78550    | 6.4    | hypothetical protein LOC55037 [Homo sapiens]                        |        |      |                                     |
| *              | HsFLAG-ARP6_Ti_10  | 3.973  | 0.3354 | 1342.68 | 1342.582 | 8067.5 | 1                                                                   | 1627.1 | 79.2 | 2 K.VAVLQALASTVNR.D                 |
| *              | HsFlag-NUFIP_Ti_11 | 3.9143 | 0.4584 | 1791.55 | 1792.091 | 5145.4 | 1                                                                   | 805.1  | 63.3 | 2 K.AIGIEPSLATYHHIIR.L              |
| *              | HsFlag-NUFIP_Ti_10 | 2.568  | 0.2269 | 970.2   | 970.076  | 3807.9 | 3                                                                   | 490.3  | 85.7 | 1 K.FIGPDQHR.N                      |
| gij 63003897 r | 2                  | 3      | 5.40%  | 690     | 77673    | 8.8    | transcription factor NRF [Homo sapiens]                             |        |      |                                     |
| *              | HsFLAG-ARP6_Ti_10  | 3.6403 | 0.2866 | 2892.53 | 2892.157 | 9416.1 | 2                                                                   | 813.5  | 28   | 1 K.HWTNFVITENANDAIGILNNSASFNK.M    |
| *              | HsFLAG-ARP6_Ti_10  | 2.8514 | 0.2082 | 1256.47 | 1256.488 | 5387.1 | 1                                                                   | 835.1  | 80   | 2 K.KTQPTVINNLK.K                   |
| gij 27734917 r | 2                  | 2      | 5.40%  | 589     | 65472    | 7      | hypothetical protein LOC196463 [Homo sapiens]                       |        |      |                                     |
| *              | HsFLAG-ARP6_Ti_10  | 3.4745 | 0.2237 | 1826.27 | 1826.245 | 8781.4 | 6                                                                   | 679.7  | 56.2 | 1 R.VLTILEQIPGMVVVADK.T             |
| *              | HsFLAG-ARP6_Ti_10  | 3.7186 | 0.3257 | 1601.1  | 1599.667 | 4924.1 | 1                                                                   | 890.6  | 75   | 1 K.ACNPQPNGENAIAR.S                |
| gij 22035692 r | 2                  | 2      | 5.40%  | 460     | 50838    | 8      | GDNF family receptor alpha 1 isoform b preproprotein [Homo sapiens] |        |      |                                     |
| *              | HsFLAG-ARP6_Ti_10  | 3.1533 | 0.1979 | 1364.66 | 1365.659 | 3365.8 | 1                                                                   | 463.2  | 72.7 | 1 R.VVPFISVEHIPK.G                  |
|                | HsFLAG-ARP6_Ti_10  | 3.2381 | 0.3419 | 1637.25 | 1637.799 | 7015.4 | 1                                                                   | 918.5  | 66.7 | 1 R.RQTIVPVCYSYEER.E                |
| gij 32698750 r | 3                  | 12     | 5.30%  | 1312    | 139265   | 9.2    | serine arginine-rich pre-mRNA splicing factor SR-A1 [Homo sapiens]  |        |      |                                     |

|                |                    |        |        |         |          |         |   |        |      |    |                                                                 |
|----------------|--------------------|--------|--------|---------|----------|---------|---|--------|------|----|-----------------------------------------------------------------|
| *              | HsFLAG-ARP6_Ti_1   | 4.3011 | 0.4616 | 1685.51 | 1684.892 | 5922.7  | 1 | 1509.5 | 69.4 | 10 | R.SPSPAPAPAPAAAAGPPTR.K                                         |
| *              | HsFlag-NUFIP_Ti_11 | 3.7929 | 0.3227 | 2195.35 | 2194.495 | 7102.7  | 1 | 1044.7 | 38.2 | 1  | R.RGAVPPSIQDLTDHDLFAIK.R                                        |
| *              | HsFlag-NUFIP_Ti_1C | 4.2283 | 0.4162 | 2822.86 | 2822.879 | 5643    | 1 | 696.5  | 29.3 | 1  | K.ESAPSSGPPPKPPVSSGSGSSSSSSSSCSSR.K                             |
| gij 4504035 re |                    | 2      | 2      | 5.30%   | 693      | 76715   |   |        |      |    | 6.9 guanine monophosphate synthetase [Homo sapiens]             |
| *              | HsFlag-VPS71_Ti_1C | 2.7395 | 0.2029 | 2182.99 | 2180.549 | 5035.1  | 9 | 296.1  | 38.9 | 1  | R.ELFVQSEIFPLETPAFAIK.E                                         |
| *              | HsFLAG-p53-DNA-D   | 3.2816 | 0.3616 | 2039.71 | 2040.515 | 9496.8  | 1 | 839.3  | 47.1 | 1  | K.LMQITSLHSLNAFLPIK.T                                           |
| gij 8922679 re |                    | 2      | 2      | 5.30%   | 513      | 57528   |   |        |      |    | 7.2 smu-1 suppressor of mec-8 and unc-52 homolog [Homo sapiens] |
| *              | HsFLAG-Lin9_Ti_20  | 4.6784 | 0.2826 | 2061.34 | 2060.439 | 9586.3  | 1 | 1377.1 | 62.5 | 1  | K.TLIDLYEQVVLELIELR.E                                           |
| *              | HsARP6-FLAG_Ti_1   | 2.5532 | 0.1851 | 1243.45 | 1242.464 | 5818.2  | 4 | 865.4  | 83.3 | 1  | R.YIHLENLLAR.S                                                  |
| gij 4505047 re |                    | 1      | 2      | 5.30%   | 338      | 38429   |   |        |      |    | 6.6 lumican precursor [Homo sapiens]                            |
| *              | HsFLAG-TCF3_Ti_1C  | 4.2948 | 0.3697 | 1959.71 | 1958.305 | 5610    | 1 | 404.4  | 50   | 2  | R.LPSGLPVSLLTLYLDNNK.I                                          |
| gij 13540523 r |                    | 1      | 2      | 5.30%   | 282      | 31525   |   |        |      |    | 4.6 nucleosomal binding protein 1 [Homo sapiens]                |
| *              | HsFlag-VPS71_Ti_1C | 3.2532 | 0.0951 | 1611.13 | 1610.008 | 2823.2  | 1 | 436.3  | 64.3 | 2  | R.LSAMLVPVTPEVKPK.R                                             |
| gij 4557385 re |                    | 6      | 13     | 5.20%   | 1663     | 187163  |   |        |      |    | 6.4 complement component 3 precursor [Homo sapiens]             |
|                | HsFLAG-p53-DNA-D   | 3.4222 | 0.2361 | 2445.09 | 2445.818 | 5589.5  | 1 | 482.8  | 42.9 | 1  | R.EPGQDLVVLPLSITTDIFPSFR.L                                      |
|                | HsSrcap_Ti_202.327 | 3.754  | 0.2305 | 2158.93 | 2158.431 | 6687.1  | 1 | 646.5  | 47.4 | 4  | R.ILLQGTPVAQMTEDAVER.L                                          |
|                | HsScrap_Ti_102.331 | 4.8672 | 0.3598 | 2160.98 | 2158.431 | 8508.7  | 1 | 1138.4 | 39.5 | 1  | R.ILLQGTPVAQMTEDAVER.L                                          |
|                | HsScrap_Ti_103.271 | 3.6074 | 0.3745 | 1339.08 | 1336.574 | 4321.9  | 1 | 920.9  | 81.8 | 4  | R.APSTWLTAYVVK.V                                                |
|                | HsSrcap_Ti_205.487 | 5.5296 | 0.5112 | 2217.68 | 2218.608 | 8028.6  | 1 | 1578.1 | 60   | 1  | K.VFSLAVNLIIDSQVLCGAVK.W                                        |
|                | HsScrap_Ti_102.175 | 2.4215 | 0.227  | 1300.28 | 1301.405 | 4096.5  | 1 | 480.4  | 65   | 2  | K.ACEPGVDYVYK.T                                                 |
| gij 30794372 r |                    | 5      | 6      | 5.20%   | 1602     | 183689  |   |        |      |    | 6.7 polybromo 1 isoform 1 [Homo sapiens]                        |
| gij 41281917 r |                    | 5      | 6      | 5.20%   | 1582     | 182117  |   |        |      |    | 6.8 polybromo 1 isoform 4 [Homo sapiens]                        |
|                | HsFLAG-FLJ20729_   | 3.4422 | 0.2419 | 2039.65 | 2040.295 | 8859.3  | 1 | 926.4  | 56.2 | 1  | R.NQPDYEVVVSQPIDLMK.I                                           |
|                | HsFLAG-Lin9_Ti_20  | 2.656  | 0.1819 | 2053.99 | 2053.364 | 11024.5 | 3 | 595.2  | 41.7 | 2  | K.EILEQLLEAIVVATNPSSGR.L                                        |
|                | HsFLAG-p53-DNA-D   | 3.6962 | 0.2699 | 1957.27 | 1957.196 | 7896.8  | 7 | 631.9  | 50   | 1  | R.NNQQQLIAEPFYHLPK.K                                            |
|                | HsARP6-FLAG_Ti_1   | 3.213  | 0.3778 | 1444.06 | 1444.501 | 8130.2  | 1 | 949.3  | 60.7 | 1  | K.SEDSSGAAGLSGLHR.T                                             |
|                | HsFLAG-p53-DNA-D   | 2.6361 | 0.1981 | 1703.45 | 1704.063 | 5494.2  | 4 | 381.3  | 53.6 | 1  | R.KPIVPQKEPSLLEK.K                                              |
| gij 47933339 r |                    | 3      | 7      | 5.20%   | 977      | 107188  |   |        |      |    | 10.1 RNA binding motif protein 15 [Homo sapiens]                |
| *              | HsFLAG-Lin9_Ti_20  | 3.6948 | 0.3238 | 2451.29 | 2451.649 | 8252.1  | 1 | 659.1  | 40.5 | 1  | K.ISELGSQLSDEAVEDGLFHEFK.R                                      |
| *              | HsFLAG-p53-DNA-D   | 4.2206 | 0.3653 | 1776.45 | 1777.165 | 6242    | 1 | 1009   | 68.8 | 5  | R.LWVGGLGPWWPLAALAR.E                                           |
| *              | HsScrap_Ti_106.296 | 1.8947 | 0.1431 | 1516.4  | 1515.672 | 2891.1  | 2 | 142.8  | 54.5 | 1  | R.RLRVDFADTEHR.Y                                                |
| gij 73623028 r |                    | 1      | 3      | 5.20%   | 756      | 86239   |   |        |      |    | 8.4 carnitine palmitoyltransferase 1A isoform 2 [Homo sapiens]  |
| gij 73623030 r |                    | 1      | 3      | 5.00%   | 773      | 88368   |   |        |      |    | 8.7 carnitine palmitoyltransferase 1A isoform 1 [Homo sapiens]  |
|                | HsSrcap_Ti_203.567 | 5.25   | 0.3945 | 4426.55 | 4424.876 | 3292.7  | 1 | 514.4  | 25   | 3  | R.LQWDIPGECQEVIELNTANLLANDVDFHSPFVAFGK.G                        |
| gij 15149476 r |                    | 2      | 3      | 5.20%   | 660      | 75379   |   |        |      |    | 6.7 arginyl-tRNA synthetase [Homo sapiens]                      |
| *              | HsFLAG-ARP6_Ti_1   | 4.3739 | 0.4038 | 2199.77 | 2200.539 | 4289.2  | 1 | 706.4  | 61.1 | 2  | K.FPDYLTVPPIGDLQVFK.E                                           |
| *              | HsFLAG-ARP6_Ti_1   | 3.0944 | 0.1462 | 1645.33 | 1644.017 | 3502.1  | 1 | 577.6  | 60.7 | 1  | K.IVFPVPGCSIPTIVK.S                                             |
| gij 45505163 r |                    | 2      | 2      | 5.20%   | 630      | 69558   |   |        |      |    | 8.1 LISCH protein isoform 1 [Homo sapiens]                      |
| gij 45593136 r |                    | 2      | 2      | 5.70%   | 581      | 64053   |   |        |      |    | 8.8 LISCH protein isoform 3 [Homo sapiens]                      |
| gij 45545424 r |                    | 2      | 2      | 5.10%   | 649      | 71439   |   |        |      |    | 8 LISCH protein isoform 2 [Homo sapiens]                        |
|                | HsFLAG-ARP6_Ti_1   | 2.8801 | 0.2108 | 2189.03 | 2190.461 | 4911.6  | 3 | 347.9  | 38.1 | 1  | K.AATSGVPSIYAPSTYAHLSPAK.T                                      |
|                | HsFLAG-ARP6_Ti_1   | 3.4292 | 0.3023 | 1166.41 | 1166.187 | 8658.2  | 1 | 1405.5 | 80   | 1  | R.DTSSVASEVR.S                                                  |
| gij 4758024 re |                    | 2      | 4      | 5.20%   | 576      | 62608   |   |        |      |    | 9.1 coilin [Homo sapiens]                                       |



|               |                    |        |        |         |          |         |   |        |      |   |                                                                                          |
|---------------|--------------------|--------|--------|---------|----------|---------|---|--------|------|---|------------------------------------------------------------------------------------------|
| *             | HsFLAG-Lin9_Ti_20  | 3.4906 | 0.259  | 1459.42 | 1459.637 | 10639.4 | 7 | 982.3  | 58.3 | 3 | K.LPTELSKEEPSTK.N                                                                        |
| *             | HsFLAG-FLJ20309_   | 2.5094 | 0.3363 | 1785.42 | 1786.078 | 8252.4  | 3 | 607.3  | 46.9 | 1 | K.DYSLPLLAAPQVGEK.I                                                                      |
| gi 14702169 r |                    | 2      | 4      | 5.20%   | 516      | 57371   |   |        |      |   | 7.5 plasminogen activator, tissue type isoform 3 precursor [Homo sapiens]                |
| gi 4505861 re |                    | 2      | 4      | 4.80%   | 562      | 62917   |   |        |      |   | 7.8 plasminogen activator, tissue type isoform 1 preproprotein [Homo sapiens]            |
|               | HsFLAG-KIAA0515_   | 4.8569 | 0.4492 | 1618.48 | 1618.83  | 4532.3  | 1 | 950.5  | 70   | 3 | K.VYTAQNPSAQALGLGK.H                                                                     |
|               | HsFlag-FLJ90652_2  | 3.006  | 0.1636 | 1338.67 | 1336.447 | 7017.7  | 7 | 634.5  | 65   | 1 | K.HEALSPFYSER.L                                                                          |
| gi 4507215 re |                    | 2      | 4      | 5.20%   | 504      | 55705   |   |        |      |   | 8.8 signal recognition particle 54kDa [Homo sapiens]                                     |
| gi 89061728 r |                    | 2      | 4      | 15.50%  | 168      | 18341   |   |        |      |   | 4.7 PREDICTED: similar to signal recognition particle 54kDa [Homo sapiens]               |
|               | HsFLAG-p53-DNA-D   | 4.1668 | 0.3098 | 2164.22 | 2163.434 | 10429.4 | 1 | 1474.6 | 55.6 | 2 | K.SPIIFIGTGEHIDDFEPFK.T                                                                  |
|               | HsFLAG-p53-DNA-D   | 4.7266 | 0.3728 | 2964.5  | 2965.375 | 7296.9  | 1 | 609    | 27   | 2 | K.SPIIFIGTGEHIDDFEPFKTQPFISK.L                                                           |
| gi 53759145 r |                    | 2      | 3      | 5.20%   | 424      | 47981   |   |        |      |   | 5.6 G-rich RNA sequence binding factor 1 [Homo sapiens]                                  |
| *             | HsFlag-NUFIP_Ti_1  | 5.2454 | 0.4914 | 2104.62 | 2105.444 | 5553.7  | 1 | 1127   | 63.9 | 2 | R.GLPFQANAQDIINFFAPLK.P                                                                  |
| *             | HsFlag-NUFIP_Ti_11 | 3.8071 | 0.2782 | 2456.93 | 2457.881 | 9484.9  | 1 | 1557.9 | 52.4 | 1 | R.GLPFQANAQDIINFFAPLKPV.R.I                                                              |
| gi 57863281 r |                    | 1      | 3      | 5.20%   | 421      | 46175   |   |        |      |   | 5.3 Meis1, myeloid ecotropic viral integration site 1 homolog 3 isoform 1 [Homo sapiens] |
| *             | HsFLAG-Lin9_Ti_20  | 3.7873 | 0.0865 | 2261.89 | 2262.537 | 7525.4  | 1 | 778.9  | 45.2 | 3 | R.RSEAPVLPDVCLGLGSPSPGPR.W                                                               |
| gi 39930353 r |                    | 4      | 4      | 5.10%   | 1042     | 117761  |   |        |      |   | 6.7 superkiller viralicidic activity 2-like 2 [Homo sapiens]                             |
| *             | HsARP6-FLAG_Ti_1   | 2.5793 | 0.2864 | 1400    | 1399.589 | 6496.3  | 4 | 557.6  | 65   | 1 | K.EYPFILDAFQR.E                                                                          |
| *             | HsARP6-FLAG_Ti_1   | 3.1378 | 0.1845 | 1429.76 | 1427.686 | 4220    | 5 | 506.8  | 68.2 | 1 | R.NFQPVIIFSFSK.K                                                                         |
| *             | HsFLAG-Lin9_Ti_20  | 2.615  | 0.3354 | 1275.32 | 1276.396 | 8131.5  | 1 | 814.6  | 75   | 1 | K.SFYQFQHYR.A                                                                            |
| *             | HsFlag-VPS71_Ti_1  | 5.11   | 0.3003 | 2342.87 | 2342.698 | 6823.7  | 1 | 1782.3 | 43.8 | 1 | K.SNVKPNSELDPLYVVEVLLR.C                                                                 |
| gi 13399322 r |                    | 2      | 3      | 5.10%   | 1025     | 115748  |   |        |      |   | 8.3 N-acetyltransferase-like protein [Homo sapiens]                                      |
| *             | HsFLAG-FLJ20729_   | 6.0984 | 0.4461 | 2746.62 | 2745.194 | 12112.6 | 1 | 2036.7 | 34.8 | 1 | R.FLALLSYQFSTFSPSLALNIIQNR.N                                                             |
| *             | HsFLAG-Lin9_Ti_20  | 5.051  | 0.3588 | 2968.68 | 2969.497 | 7135.2  | 1 | 1338.7 | 34.3 | 2 | R.IYFLNQLGDLALSAAQSALLLIGLQHK.S                                                          |
| gi 4503635 re |                    | 2      | 5      | 5.00%   | 622      | 70037   |   |        |      |   | 5.9 coagulation factor II precursor [Homo sapiens]                                       |
| *             | HsSrcap_Ti_202.254 | 3.9368 | 0.2789 | 1646.62 | 1646.804 | 7283.7  | 1 | 1095.7 | 67.9 | 1 | K.SPQELLCGASLISDR.W                                                                      |
| *             | HsSrcap_Ti_205.349 | 4.2451 | 0.2591 | 1970.57 | 1971.275 | 4386    | 1 | 1212.7 | 73.3 | 4 | R.WVLTAAHCLLYPPWDK.N                                                                     |
| gi 4885225 re |                    | 2      | 7      | 5.00%   | 656      | 68478   |   |        |      |   | 9.3 Ewing sarcoma breakpoint region 1 isoform EWS [Homo sapiens]                         |
| gi 7669490 re |                    | 2      | 7      | 5.70%   | 583      | 61287   |   |        |      |   | 9.1 Ewing sarcoma breakpoint region 1 isoform EWS-b [Homo sapiens]                       |
|               | HsYL1_Ti_101.1578. | 3.4892 | 0.3967 | 1451.79 | 1451.53  | 4322.6  | 1 | 751.6  | 69.2 | 2 | K.GDATVSYEDPPTAK.A                                                                       |
|               | HsFLAG-Lin9_Ti_20  | 4.3423 | 0.4127 | 2235.76 | 2236.3   | 6214.9  | 1 | 1363.8 | 66.7 | 5 | R.AGDWQCPNPGCGNQFAWR.T                                                                   |
| gi 17975755 r |                    | 1      | 2      | 5.00%   | 416      | 47950   |   |        |      |   | 8.4 male-specific lethal 3-like 1 isoform d [Homo sapiens]                               |
| gi 88959236 r |                    | 1      | 2      | 4.70%   | 447      | 51070   |   |        |      |   | 8.4 PREDICTED: similar to male-specific lethal 3-like 1 isoform a [Homo sapiens]         |
| gi 41126910 r |                    | 1      | 2      | 4.70%   | 447      | 51070   |   |        |      |   | 8.4 PREDICTED: similar to male-specific lethal 3-like 1 isoform a [Homo sapiens]         |
| gi 17975761 r |                    | 1      | 2      | 5.90%   | 355      | 40577   |   |        |      |   | 8.9 male-specific lethal 3-like 1 isoform c [Homo sapiens]                               |
| gi 17975759 r |                    | 1      | 2      | 4.50%   | 462      | 53043   |   |        |      |   | 8 male-specific lethal 3-like 1 isoform b [Homo sapiens]                                 |
| gi 17975757 r |                    | 1      | 2      | 4.00%   | 521      | 59808   |   |        |      |   | 8.3 male-specific lethal 3-like 1 isoform a [Homo sapiens]                               |
|               | HsFLAG-p53-DNA-D   | 3.376  | 0.1322 | 2579.32 | 2579.995 | 7461.1  | 1 | 527.7  | 40   | 2 | R.ITFDYTLPLVLLYPYEQAYK.K                                                                 |
| gi 5174429 re |                    | 1      | 2      | 5.00%   | 397      | 42039   |   |        |      |   | 8.3 acetyl-coenzyme A acyltransferase 2 [Homo sapiens]                                   |
| *             | HsFLAG-p53-DNA-D   | 4.8918 | 0.4702 | 1835.72 | 1836.018 | 7802    | 1 | 1395.9 | 60.5 | 2 | K.TNVNGGAIALGHPLGGSGSR.I                                                                 |
| gi 7662018 re |                    | 4      | 6      | 4.90%   | 2039     | 229479  |   |        |      |   | 7 PHD finger protein 3 [Homo sapiens]                                                    |
| *             | HsMRGBP-FLAG_Ti    | 2.6308 | 0.2778 | 2607.07 | 2607.804 | 3779.7  | 1 | 233.9  | 36.4 | 1 | K.TENSLVGLPSCVDEVTECNLELK.D                                                              |
| *             | HsFLAG-UTX1_Ti_2   | 3.2487 | 0.3426 | 2145.82 | 2146.448 | 4696.8  | 1 | 362.7  | 44.4 | 2 | K.SFSLDEPLFIPDNIAIR.R                                                                    |
| *             | HsMRGBP-FLAG_Ti    | 4.0087 | 0.2242 | 3742.66 | 3741.912 | 12092.2 | 1 | 1110.1 | 25.8 | 1 | K.HSDNEAESIADALSSTSNIASEFFEEEKQESPK.S                                                    |

|                |                    |        |        |         |          |        |   |        |      |   |                                                                        |
|----------------|--------------------|--------|--------|---------|----------|--------|---|--------|------|---|------------------------------------------------------------------------|
| *              | HsMRGBP-FLAG_Ti    | 4.3212 | 0.2884 | 2553.07 | 2551.769 | 6353.3 | 1 | 868.5  | 47.8 | 2 | K.AYPVSGSPEYLTEDLPDSIQVGGR.I                                           |
| gij 21361331 r |                    | 4      | 6      | 4.90%   | 1500     | 164939 |   |        |      |   | 6.7 carbamoyl-phosphate synthetase 1, mitochondrial [Homo sapiens]     |
| *              | HsSrcap_Ti_202.374 | 4.622  | 0.3998 | 1931.53 | 1931.24  | 5235.3 | 1 | 566.3  | 52.6 | 2 | K.EPLFGISTGNLITGLAAGAK.T                                               |
| *              | HsSrcap_Ti_202.452 | 2.8381 | 0.2094 | 2310.6  | 2310.695 | 3414.4 | 6 | 183.2  | 36.8 | 1 | K.QADTVYFLPITPQFVTEVIK.A                                               |
| *              | HsSrcap_Ti_202.354 | 3.9706 | 0.3946 | 1591.8  | 1590.814 | 4271.8 | 1 | 920.8  | 75   | 2 | K.IAPSFAVESIEDALK.A                                                    |
| *              | HsSrcap_Ti_206.265 | 4.0345 | 0.4575 | 2013.98 | 2014.375 | 7282   | 1 | 884.3  | 55.9 | 1 | K.HLPTLDHPIIPADYVAIK.A                                                 |
| gij 20806097 r |                    | 2      | 7      | 4.90%   | 800      | 92548  |   |        |      |   | 9.2 nucleolar complex associated 3 homolog [Homo sapiens]              |
| *              | HsFLAG-ARP6_Ti_1   | 4.9511 | 0.3325 | 2280.11 | 2280.589 | 6241.5 | 1 | 1517.1 | 42   | 6 | R.FAAHLIAGAPSEGSGALKPELSR.R                                            |
| *              | HsFLAG-UTX1_Ti_20  | 3.7293 | 0.3516 | 1830.75 | 1830.989 | 8704.1 | 1 | 1614.2 | 66.7 | 1 | K.RYSSEVATESPLDFTK.Y                                                   |
| gij 14211927 r |                    | 2      | 2      | 4.90%   | 817      | 89451  |   |        |      |   | 5 protein phosphatase 1, regulatory subunit 9B [Homo sapiens]          |
| *              | HsFLAG-Lin9_Ti_20  | 3.7604 | 0.3217 | 2081.51 | 2082.326 | 6102.6 | 1 | 663.4  | 34.2 | 1 | R.FDSKPAPSAQPAPPPHPPSR.L                                               |
| *              | HsFLAG-Lin9_Ti_20  | 4.0542 | 0.2592 | 2361.86 | 2362.527 | 5737.3 | 1 | 1235.3 | 42.1 | 1 | K.LEGYWGEAQLCQAVDEHLR.E                                                |
| gij 8922388 re |                    | 3      | 4      | 4.90%   | 759      | 85766  |   |        |      |   | 9.2 RNA binding motif protein 28 [Homo sapiens]                        |
| *              | HsFLAG-ARP6_Ti_1   | 3.4315 | 0.3843 | 1750.24 | 1749.979 | 8445.5 | 1 | 676.9  | 50   | 1 | R.GFGYVTFMSLEDVQR.A                                                    |
| *              | HsFLAG-p53-DNA-D   | 3.6367 | 0.2417 | 2556.6  | 2555.755 | 8230.4 | 1 | 781.2  | 45.2 | 2 | R.NLSFDSEEEELGELLQQFGELK.Y                                             |
| *              | HsFLAG-FLJ20729_   | 3.7504 | 0.2789 | 2556.63 | 2555.755 | 6789.2 | 1 | 1125.1 | 38.1 | 1 | R.NLSFDSEEEELGELLQQFGELK.Y                                             |
| gij 45331215 r |                    | 1      | 2      | 4.90%   | 669      | 72759  |   |        |      |   | 6.5 leucine zipper, putative tumor suppressor 2 [Homo sapiens]         |
| *              | HsFLAG-Lin9_Ti_20  | 4.5986 | 0.3128 | 3349.19 | 3348.691 | 5629.3 | 1 | 886.9  | 28.1 | 2 | K.AGQLDAEAAAGLREPPVPPATADPFLLAESDEAK.V                                 |
| gij 8922532 re |                    | 1      | 3      | 4.90%   | 470      | 52118  |   |        |      |   | 5.1 family with sequence similarity 82, member C [Homo sapiens]        |
| *              | HsSrcap_Ti_202.570 | 6.2825 | 0.5063 | 2405.81 | 2406.736 | 6819.2 | 1 | 1766.2 | 61.4 | 3 | K.TATALLESPLSATVEDALQSFLK.A                                            |
| gij 20149592 r |                    | 1      | 2      | 4.90%   | 350      | 38452  |   |        |      |   | 5.1 serine/threonine kinase receptor associated protein [Homo sapiens] |
|                | HsFLAG-ARP6_Ti_1   | 3.4928 | 0.45   | 1798.83 | 1799.978 | 7538.8 | 1 | 907.5  | 56.2 | 2 | K.SFEAPATINSASLHPEK.E                                                  |
| gij 18379334 r |                    | 1      | 4      | 4.90%   | 305      | 34208  |   |        |      |   | 11.8 RNA-binding protein S1, serine-rich domain [Homo sapiens]         |
| gij 6857826 re |                    | 1      | 4      | 4.90%   | 305      | 34208  |   |        |      |   | 11.8 RNA-binding protein S1, serine-rich domain [Homo sapiens]         |
|                | HsFlag-DPCD_Ti_20  | 4.2031 | 0.4649 | 1760.94 | 1761.839 | 7704.8 | 1 | 1604   | 71.4 | 4 | K.GYAYVEFENPDEAEK.A                                                    |
| gij 9506689 re |                    | 1      | 5      | 4.90%   | 245      | 26383  |   |        |      |   | 6.5 exosome component 4 [Homo sapiens]                                 |
| *              | HsFlag-VPS71_Ti_1  | 3.6042 | 0.3508 | 1325.33 | 1325.553 | 5748.1 | 1 | 1052.8 | 77.3 | 5 | K.ALAVVYGPHEIR.G                                                       |
| gij 22538465 r |                    | 1      | 4      | 4.90%   | 205      | 22949  |   |        |      |   | 6.5 proteasome beta 3 subunit [Homo sapiens]                           |
| *              | HsFlag-VPS71_Ti_1  | 3.3616 | 0.1904 | 1147.78 | 1146.258 | 6580.9 | 1 | 1229.3 | 88.9 | 4 | K.NCVAIAADRR.F                                                         |
| gij 21361861 r |                    | 3      | 3      | 4.80%   | 1471     | 166461 |   |        |      |   | 6.2 Fanconi anemia complementation group D2 isoform a [Homo sapiens]   |
| gij 66528888 r |                    | 3      | 3      | 4.90%   | 1451     | 164128 |   |        |      |   | 5.9 Fanconi anemia complementation group D2 isoform b [Homo sapiens]   |
|                | HsARP6-FLAG_Ti_1   | 4.347  | 0.3875 | 1520.2  | 1520.94  | 8354.5 | 1 | 2059   | 80.8 | 1 | K.LLLGIDILQPAIK.T                                                      |
|                | HsFLAG-Lin9_Ti_20  | 2.8824 | 0.1222 | 2643.11 | 2642.062 | 8319.9 | 7 | 284.6  | 28.3 | 1 | K.ELSDLLIENTSLTVPILDVLSLR.L                                            |
|                | HsFLAG-Lin9_Ti_20  | 3.6133 | 0.3269 | 3557.43 | 3560.038 | 4935.8 | 4 | 253.4  | 18   | 1 | K.YLAVTPDYVPPLGNFDVETLDITPHTVTAISAK.I                                  |
| gij 29029559 r |                    | 2      | 5      | 4.80%   | 971      | 110417 |   |        |      |   | 5.8 CSE1 chromosome segregation 1-like protein [Homo sapiens]          |
|                | HsFLAG-ARP8_Ti_2   | 3.6661 | 0.3851 | 2435.14 | 2434.835 | 7971.9 | 1 | 817.7  | 47.5 | 4 | K.FLESVEGNQNYPLLLLTLEK.S                                               |
| *              | HsFLAG-Lin9_Ti_20  | 4.0296 | 0.314  | 2806.6  | 2806.274 | 6799.3 | 1 | 687.1  | 40   | 1 | R.GPNNATLFTAAEIAFPVEILLTNLFK.A                                         |
| gij 20127460 r |                    | 3      | 5      | 4.80%   | 940      | 105953 |   |        |      |   | 8.9 xeroderma pigmentosum, complementation group C [Homo sapiens]      |
| *              | HsFLAG-p53-DNA-D   | 3.5698 | 0.3136 | 2120.7  | 2121.479 | 5091.5 | 1 | 487.2  | 50   | 2 | R.SLLPVKPVIEIETPEQAK.T                                                 |
| *              | HsH2AZ-FLAG_293_   | 4.1511 | 0.403  | 1431.14 | 1430.598 | 5873.9 | 1 | 1224.1 | 81.8 | 2 | R.DVDTYLNLVK.W                                                         |
| *              | HsFlag-FLJ90652_2  | 3.5821 | 0.292  | 1586.85 | 1584.874 | 8276.4 | 1 | 1168.7 | 69.2 | 1 | K.HMDQPLPTAIGLYK.N                                                     |
| gij 38327039 r |                    | 3      | 6      | 4.80%   | 840      | 94331  |   |        |      |   | 5.2 heat shock 70kDa protein 4 isoform a [Homo sapiens]                |
|                | HsFLAG-ARP6_Ti_1   | 3.0338 | 0.2211 | 1904.07 | 1904.214 | 5366.4 | 1 | 630    | 50   | 1 | K.SNLAYDIVQLPTGLTGIK.V                                                 |

|               |                    |        |        |         |          |        |   |        |      |   |                                                                                                                         |
|---------------|--------------------|--------|--------|---------|----------|--------|---|--------|------|---|-------------------------------------------------------------------------------------------------------------------------|
|               | HsFLAG-ARP6_Ti_1   | 5.0602 | 0.396  | 1537.59 | 1536.744 | 7693   | 1 | 1948.6 | 80.8 | 4 | R.GCALQCAILSPAFAK.V                                                                                                     |
|               | HsFlag-FLJ90652_2  | 2.0861 | 0.2198 | 871.37  | 871.971  | 2993.4 | 2 | 294.8  | 78.6 | 1 | K.NHAAPFSK.V                                                                                                            |
| gi 13129068 r |                    | 2      | 3      | 4.80%   | 516      | 58468  |   |        |      |   | 7.5 nucleolar complex associated 4 homolog [Homo sapiens]                                                               |
| gi 89036504 r |                    | 2      | 3      | 4.80%   | 520      | 58322  |   |        |      |   | 7.3 PREDICTED: similar to nucleolar complex associated 4 homolog isoform 2 [Homo sapiens]                               |
|               | HsFLAG-Lin9_Ti_20  | 3.3629 | 0.3043 | 1425.29 | 1425.671 | 6079   | 1 | 868.2  | 62.5 | 2 | R.LGELLGHPSFQVK.E                                                                                                       |
|               | HsFlag-NUFIP_Ti_20 | 3.7609 | 0.1683 | 1368.24 | 1368.575 | 6769.9 | 1 | 1456.2 | 81.8 | 1 | K.FVQLEGAPLEK.S                                                                                                         |
| gi 13540531 r |                    | 1      | 2      | 4.80%   | 392      | 42907  |   |        |      |   | 7.1 integrin-linked kinase-associated protein phosphatase 2C isoform 1 [Homo sapiens]                                   |
| *             | HsFlag-VPS71_Ti_10 | 3.2122 | 0.3851 | 2241.09 | 2241.466 | 6581.2 | 1 | 910.4  | 52.8 | 2 | K.VFTPEEAVNFILSCLEDEK.I                                                                                                 |
| gi 33598968 r |                    | 4      | 10     | 4.70%   | 1349     | 153670 |   |        |      |   | 7.8 LIM domain only 7 [Homo sapiens]                                                                                    |
| *             | HsFlag-VPS71_Ti_10 | 5.8219 | 0.3822 | 2741    | 2740.987 | 6107.6 | 1 | 1836.8 | 40.4 | 3 | K.RTPNNVVSTPAPSPDASQLASSLSSQK.E                                                                                         |
| *             | HsFlag-VPS71_Ti_10 | 3.2364 | 0.1871 | 1226.51 | 1226.418 | 7497.5 | 1 | 1464.4 | 94.4 | 3 | K.KPQDQLVIER.E                                                                                                          |
| *             | HsYL1_Ti_101.1526  | 2.9484 | 0.3208 | 1375.98 | 1374.401 | 5013   | 1 | 750.3  | 68.2 | 2 | R.STTELDYSTNK.N                                                                                                         |
| *             | HsFlag-VPS71_Ti_10 | 3.7875 | 0.4726 | 1505.69 | 1505.625 | 6935.8 | 1 | 1210.1 | 71.4 | 2 | K.TSTTGVAATQSPTR.S                                                                                                      |
| gi 57863269 r |                    | 2      | 3      | 4.70%   | 758      | 84428  |   |        |      |   | 9.8 hypothetical protein LOC23076 [Homo sapiens]                                                                        |
| *             | HsFLAG-Lin9_Ti_20  | 4.2128 | 0.2944 | 2335.53 | 2335.455 | 7295.5 | 1 | 969.9  | 52.6 | 1 | R.GRDDCGTFEDTGPLLQFDYK.A                                                                                                |
| *             | HsFLAG-FLJ20309_   | 3.1271 | 0.4    | 1605.52 | 1605.791 | 4423.5 | 2 | 331.6  | 46.7 | 2 | K.SSTATHPPGPAVQLNK.T                                                                                                    |
| gi 50959085 r |                    | 3      | 5      | 4.70%   | 683      | 78508  |   |        |      |   | 6.9 Fms-interacting protein [Homo sapiens]                                                                              |
| gi 50959115 r |                    | 3      | 5      | 4.70%   | 683      | 78508  |   |        |      |   | 6.9 Fms-interacting protein [Homo sapiens]                                                                              |
| gi 50959110 r |                    | 3      | 5      | 4.70%   | 683      | 78508  |   |        |      |   | 6.9 Fms-interacting protein [Homo sapiens]                                                                              |
| gi 50959102 r |                    | 3      | 5      | 4.70%   | 683      | 78508  |   |        |      |   | 6.9 Fms-interacting protein [Homo sapiens]                                                                              |
|               | HsFLAG-p53-DNA-D   | 2.5717 | 0.192  | 1221.42 | 1221.399 | 7630.7 | 2 | 695.5  | 72.2 | 1 | K.KEYLSSLQPR.L                                                                                                          |
|               | HsARP6-FLAG_Ti_1   | 3.8131 | 0.2736 | 2544.3  | 2544.996 | 5768.1 | 1 | 695.7  | 32.1 | 1 | K.VGILTLSDYVLELGHPLYLWVQK.L                                                                                             |
|               | HsFlag-VPS71_Ti_10 | 4.1432 | 0.3863 | 2546.07 | 2544.996 | 9428.9 | 1 | 1127.6 | 45.2 | 3 | K.VGILTLSDYVLELGHPLYLWVQK.L                                                                                             |
| gi 19923521 r |                    | 2      | 4      | 4.70%   | 682      | 76852  |   |        |      |   | 9.4 cytoskeleton associated protein 2 [Homo sapiens]                                                                    |
| *             | HsFLAG-ARP6_Ti_1   | 3.0249 | 0.3655 | 1556.9  | 1557.787 | 3927.2 | 1 | 447.8  | 60.7 | 2 | K.ATKPQPVNTSSVTVK.S                                                                                                     |
| *             | HsFLAG-ARP6_Ti_1   | 3.2235 | 0.3491 | 2003.94 | 2005.158 | 4868.7 | 1 | 567.3  | 56.2 | 2 | K.DHYPCVSSLEQLTELGR.E                                                                                                   |
| gi 61744475 r |                    | 2      | 4      | 4.70%   | 661      | 71123  |   |        |      |   | 5 solute carrier family 3 (activators of dibasic and neutral amino acid transport), member 2 isoform a [Homo sapiens]   |
| gi 65506891 r |                    | 2      | 4      | 4.90%   | 630      | 67994  |   |        |      |   | 5 solute carrier family 3 (activators of dibasic and neutral amino acid transport), member 2 isoform c [Homo sapiens]   |
| gi 61744483 r |                    | 2      | 4      | 5.90%   | 529      | 57945  |   |        |      |   | 5.3 solute carrier family 3 (activators of dibasic and neutral amino acid transport), member 2 isoform f [Homo sapiens] |
| gi 61744481 r |                    | 2      | 4      | 5.50%   | 568      | 61816  |   |        |      |   | 5.2 solute carrier family 3 (activators of dibasic and neutral amino acid transport), member 2 isoform e [Homo sapiens] |
| gi 61744479 r |                    | 2      | 4      | 5.20%   | 599      | 64873  |   |        |      |   | 5.1 solute carrier family 3 (activators of dibasic and neutral amino acid transport), member 2 isoform d [Homo sapiens] |
| gi 61744477 r |                    | 2      | 4      | 4.90%   | 631      | 68101  |   |        |      |   | 5 solute carrier family 3 (activators of dibasic and neutral amino acid transport), member 2 isoform b [Homo sapiens]   |
|               | HsFLAG-ARP6_Ti_1   | 3.561  | 0.3261 | 1866.76 | 1868.103 | 8456.4 | 1 | 902.8  | 50   | 1 | R.IGDLQAFQGHGAGNLAGLK.G                                                                                                 |
|               | HsFLAG-ARP6_Ti_1   | 3.0944 | 0.2796 | 1374.06 | 1372.694 | 4754.2 | 2 | 481.1  | 63.6 | 3 | R.LLTSFLPAQLLR.L                                                                                                        |
| gi 17402907 r |                    | 2      | 3      | 4.70%   | 570      | 63844  |   |        |      |   | 7 tripartite motif protein TRIM29 isoform beta [Homo sapiens]                                                           |
| gi 17402909 r |                    | 2      | 3      | 4.60%   | 588      | 65835  |   |        |      |   | 7.1 tripartite motif protein TRIM29 isoform alpha [Homo sapiens]                                                        |
|               | HsYL1_Ti_104.1343  | 2.6712 | 0.1219 | 1173.37 | 1172.327 | 5300.9 | 5 | 664.1  | 68.2 | 1 | K.SLGSALKPGEGR.S                                                                                                        |
|               | HsYL1_Ti_101.1790  | 4.3973 | 0.3318 | 1656.6  | 1655.688 | 4403.6 | 1 | 1119.9 | 71.4 | 2 | K.SGSEEVLCDSICGNK.Q                                                                                                     |
| gi 42475941 r |                    | 3      | 9      | 4.60%   | 1370     | 152379 |   |        |      |   | 6.4 zinc finger protein 261 [Homo sapiens]                                                                              |
| gi 4827067 re |                    | 3      | 9      | 4.60%   | 1370     | 152379 |   |        |      |   | 6.4 zinc finger protein 261 [Homo sapiens]                                                                              |
|               | HsFLAG-Lin9_Ti_20  | 2.9519 | 0.3485 | 2433.5  | 2434.708 | 5273.6 | 4 | 290.9  | 35.4 | 1 | R.GWAPPGPSPPSSGALDLLDTPAGLEK.D                                                                                          |
|               | HsFlag-VPS71_Ti_10 | 6.6424 | 0.4484 | 2003.78 | 2002.315 | 8005   | 1 | 3438.8 | 78.9 | 6 | K.DPGVLDGATELLGLGGLLYK.A                                                                                                |
|               | HsFLAG-Lin9_Ti_20  | 3.1668 | 0.3362 | 1750.07 | 1750.007 | 5577.7 | 1 | 835.5  | 61.8 | 2 | R.SAPTAPTPPPPPATPR.K                                                                                                    |

|                      |        |    |        |         |          |                                                                                                              |   |        |      |                                     |
|----------------------|--------|----|--------|---------|----------|--------------------------------------------------------------------------------------------------------------|---|--------|------|-------------------------------------|
| gij 21327715 r       | 4      | 7  | 4.60%  | 1098    | 123901   | 8.6 transcription elongation regulator 1 [Homo sapiens]                                                      |   |        |      |                                     |
| * HsFLAG-p53-DNA-D   | 4.0074 |    | 0.3667 | 2032.58 | 2033.164 | 8988                                                                                                         | 1 | 812.7  | 46.9 | 2 K.SDFFELLSNHHLDSQSR.W             |
| * HsFLAG-ARP6_Ti_1   | 2.9019 |    | 0.2609 | 1314.56 | 1315.512 | 7478.2                                                                                                       | 2 | 834.8  | 75   | 2 K.LFNEHIEALTK.K                   |
| * HsFLAG-p53-DNA-D   | 4.4975 |    | 0.2153 | 1338.96 | 1339.535 | 9720.4                                                                                                       | 1 | 1938.5 | 90   | 2 K.KLIQESDQHLK.D                   |
| * HsFlag-VPS71_Ti_1( | 3.6878 |    | 0.2387 | 1550.02 | 1549.733 | 5971.4                                                                                                       | 1 | 1444.3 | 86.4 | 1 K.RYLVLDVCPEER.R                  |
| gij 41327773 r       | 3      | 5  | 4.60%  | 1031    | 117362   | 9.3 DEAD (Asp-Glu-Ala-Asp) box polypeptide 46 [Homo sapiens]                                                 |   |        |      |                                     |
| * HsFLAG-FLJ20309_   | 1.8333 |    | 0.0844 | 846.64  | 847.043  | 7197.1                                                                                                       | 3 | 531.2  | 78.6 | 1 K.VVTVVTTK.K                      |
| * HsFLAG-FLJ20729_   | 5.2384 |    | 0.3437 | 2529.38 | 2529.783 | 5239.6                                                                                                       | 1 | 1386.2 | 44.7 | 3 K.HLILVNYSCPNHYEDYVHR.A           |
| * HsFlag-VPS71_Ti_1( | 2.9719 |    | 0.3699 | 2101.84 | 2102.37  | 10627.2                                                                                                      | 1 | 904.2  | 47.2 | 1 K.NLGIESQDVMQQATNAILR.G           |
| gij 23097292 r       | 3      | 3  | 4.60%  | 1024    | 114681   | 9.2 processing of precursor 1, ribonuclease P/MRP subunit [Homo sapiens]                                     |   |        |      |                                     |
| * HsYL1_Ti_106.2400. | 2.5402 |    | 0.2651 | 1594.2  | 1592.919 | 4982.8                                                                                                       | 2 | 456.6  | 60.7 | 1 R.LIGPLSHSILTEAIK.A               |
| * HsARP6-FLAG_Ti_1   | 3.187  |    | 0.1659 | 1221.08 | 1220.541 | 6584.9                                                                                                       | 1 | 800.1  | 75   | 1 K.IPILLIQPGK.V                    |
| * HsSrcap_Ti_202.425 | 2.5098 |    | 0.2242 | 2595.75 | 2595.803 | 7274                                                                                                         | 5 | 200.9  | 30   | 1 K.LGTLAPFCCPWEQLTQDWESR.V         |
| gij 7662128 re       | 2      | 4  | 4.60%  | 697     | 78292    | 7.6 zinc finger and BTB domain containing 24 [Homo sapiens]                                                  |   |        |      |                                     |
| * HsFLAG-ARP6_Ti_1   | 3.4308 |    | 0.3917 | 1755.97 | 1754.915 | 6594.9                                                                                                       | 1 | 966.1  | 69.2 | 3 K.KPFSCPECNLQFAR.L                |
| * HsFLAG-ARP6_Ti_2   | 5.0667 |    | 0.4901 | 1834.4  | 1834.851 | 6601.6                                                                                                       | 1 | 1398.1 | 70.6 | 1 K.HASDASSISGSSNTEEV.R             |
| gij 4506387 re       | 1      | 4  | 4.60%  | 409     | 43171    | 4.8 UV excision repair protein RAD23 homolog B [Homo sapiens]                                                |   |        |      |                                     |
| * HsFLAG-p53-DNA-D   | 4.9875 |    | 0.4735 | 2131.13 | 2131.526 | 6238                                                                                                         | 1 | 759.1  | 55.6 | 4 R.QIIQQNPSLLPALLQQIGR.E           |
| gij 5902060 re       | 1      | 2  | 4.60%  | 350     | 39642    | 5.1 XRP2 protein [Homo sapiens]                                                                              |   |        |      |                                     |
| * HsFLAG-ARP6_Ti_1   | 3.8258 |    | 0.3603 | 2131.08 | 2132.391 | 6249.8                                                                                                       | 1 | 1129.9 | 63.3 | 2 K.FGCFQWYYPELAFQFK.D              |
| gij 7661790 re       | 1      | 2  | 4.60%  | 241     | 28660    | 9.9 hypothetical protein LOC29080 [Homo sapiens]                                                             |   |        |      |                                     |
| * HsYL1_Ti_101.1504. | 3.5406 |    | 0.2732 | 1337.69 | 1337.429 | 5453                                                                                                         | 2 | 1300.3 | 80   | 2 K.AQEEYEQIQAK.R                   |
| gij 51493127 r       | 5      | 21 | 4.50%  | 2140    | 240735   | 6.6 PREDICTED: YLP motif containing 1 isoform 1 [Homo sapiens]                                               |   |        |      |                                     |
| gij 89037741 r       | 5      | 21 | 4.50%  | 2140    | 240735   | 6.6 PREDICTED: similar to YLP motif containing protein 1 (Nuclear protein ZAP3) (ZAP113) isoform 16 [Homo sa |   |        |      |                                     |
| gij 89037739 r       | 5      | 21 | 4.60%  | 2067    | 232369   | 6.5 PREDICTED: similar to YLP motif containing protein 1 (Nuclear protein ZAP3) (ZAP113) isoform 15 [Homo sa |   |        |      |                                     |
| gij 89037737 r       | 5      | 21 | 4.60%  | 2078    | 233330   | 6.6 PREDICTED: similar to YLP motif containing protein 1 (Nuclear protein ZAP3) (ZAP113) isoform 14 [Homo sa |   |        |      |                                     |
| gij 89037731 r       | 5      | 21 | 4.70%  | 2061    | 231704   | 6.5 PREDICTED: similar to YLP motif containing protein 1 (Nuclear protein ZAP3) (ZAP113) isoform 11 [Homo sa |   |        |      |                                     |
| gij 89037729 r       | 5      | 21 | 4.70%  | 2057    | 231141   | 6.6 PREDICTED: similar to YLP motif containing protein 1 (Nuclear protein ZAP3) (ZAP113) isoform 10 [Homo sa |   |        |      |                                     |
| gij 89037727 r       | 5      | 21 | 4.50%  | 2146    | 241643   | 6.6 PREDICTED: similar to YLP motif containing protein 1 (Nuclear protein ZAP3) (ZAP113) isoform 9 [Homo sap |   |        |      |                                     |
| gij 89037372 r       | 5      | 21 | 4.60%  | 2067    | 232369   | 6.5 PREDICTED: YLP motif containing 1 isoform 8 [Homo sapiens]                                               |   |        |      |                                     |
| gij 89037370 r       | 5      | 21 | 4.60%  | 2078    | 233330   | 6.6 PREDICTED: YLP motif containing 1 isoform 7 [Homo sapiens]                                               |   |        |      |                                     |
| gij 89037364 r       | 5      | 21 | 4.70%  | 2061    | 231704   | 6.5 PREDICTED: YLP motif containing 1 isoform 4 [Homo sapiens]                                               |   |        |      |                                     |
| gij 89037362 r       | 5      | 21 | 4.70%  | 2057    | 231141   | 6.6 PREDICTED: YLP motif containing 1 isoform 3 [Homo sapiens]                                               |   |        |      |                                     |
| gij 89037360 r       | 5      | 21 | 4.50%  | 2146    | 241643   | 6.6 PREDICTED: YLP motif containing 1 isoform 2 [Homo sapiens]                                               |   |        |      |                                     |
| HsFLAG-p53-DNA-D     | 4.1542 |    | 0.1735 | 1989.84 | 1989.26  | 10464.2                                                                                                      | 1 | 1049.5 | 56.7 | 1 R.EQHLAQLQLQQMHHQK.Q              |
| HsFLAG-ARP6_Ti_1     | 3.2123 |    | 0.2396 | 1570.97 | 1571.817 | 3098.8                                                                                                       | 2 | 547.9  | 60   | 4 K.SQLLAPPPPSAPPNGK.T              |
| HsFLAG-Lin9_Ti_20    | 4.0311 |    | 0.3954 | 2882.75 | 2884.126 | 6296.3                                                                                                       | 1 | 588.8  | 35.7 | 1 K.SALPYSSFSSDQGLGESSAAPSQPITAVK.D |
| HsFLAG-ARP6_Ti_1     | 2.865  |    | 0.2475 | 2060.13 | 2058.29  | 11436.4                                                                                                      | 2 | 442.8  | 37.5 | 1 R.VLSLDDYFITEVEKEEK.D             |
| HsFLAG-p53-DNA-D     | 4.2342 |    | 0.413  | 2082.66 | 2083.348 | 4649                                                                                                         | 1 | 796.5  | 61.8 | 14 K.TLDDGFFPFIILDAINDR.V           |
| gij 6005784 re       | 2      | 3  | 4.50%  | 644     | 72758    | 4.9 suppressor of <i>S. cerevisiae</i> gcr2 [Homo sapiens]                                                   |   |        |      |                                     |
| HsFlag-ZnF-HIT2_Ti   | 2.81   |    | 0.3114 | 1202.41 | 1201.429 | 4544.6                                                                                                       | 1 | 598.5  | 77.3 | 2 K.GGVPAMHFGVTK.F                  |
| * HsFlag-ZnF-HIT2_Ti | 2.9673 |    | 0.4048 | 1849.34 | 1850.165 | 6633.6                                                                                                       | 1 | 821.4  | 59.4 | 1 K.SLVTASPLWASFLESLK.K             |
| gij 7706501 re       | 2      | 4  | 4.50%  | 641     | 69998    | 8.4 WW domain binding protein 11 [Homo sapiens]                                                              |   |        |      |                                     |

|                  |                    |          |          |              |            |              |   |        |      |   |                                                                                                               |
|------------------|--------------------|----------|----------|--------------|------------|--------------|---|--------|------|---|---------------------------------------------------------------------------------------------------------------|
| *                | HsFLAG-p53-DNA-D   | 3.6912   | 0.3556   | 1430.81      | 1429.749   | 3528.9       | 1 | 847.4  | 80.8 | 2 | R.AVSILPLLGHGVPR.L                                                                                            |
| *                | HsFLAG-FLJ20729_   | 3.0693   | 0.1217   | 1541.21      | 1541.788   | 6535.8       | 1 | 662.5  | 57.1 | 2 | K.ATATISAKPQITNPK.A                                                                                           |
| gij13899354 r    |                    | 1        | 2        | 4.50%        | 359        | 40150        |   |        |      |   | 6.7 RNA binding motif protein 4B [Homo sapiens]                                                               |
| gij89034901 r    |                    | 1        | 2        | 11.20%       | 143        | 16173        |   |        |      |   | 6 PREDICTED: similar to RNA binding motif protein 4 isoform 4 [Homo sapiens]                                  |
| gij89034899 r    |                    | 1        | 2        | 9.00%        | 177        | 20044        |   |        |      |   | 7.8 PREDICTED: similar to RNA binding motif protein 4 isoform 3 [Homo sapiens]                                |
| gij89034897 r    |                    | 1        | 2        | 9.00%        | 177        | 20044        |   |        |      |   | 7.8 PREDICTED: similar to RNA binding motif protein 4 isoform 2 [Homo sapiens]                                |
| gij4506445 re    |                    | 1        | 2        | 4.40%        | 366        | 40940        |   |        |      |   | 8.2 RNA binding motif protein 4 [Homo sapiens]                                                                |
|                  | HsFLAG-ARP6_Ti_10  | 4.2613   | 0.4182   | 1898.57      | 1898.129   | 7115.7       | 1 | 1551.2 | 70   | 2 | R.AKFEEYGPVIECDIVK.D                                                                                          |
| gij29826335 r    |                    | 1        | 3        | 4.50%        | 333        | 38388        |   |        |      |   | 5.8 eukaryotic translation initiation factor 2 beta [Homo sapiens]                                            |
| *                | HsFlag-VPS71_Ti_10 | 3.7924   | 0.3597   | 1758.5       | 1757.808   | 8740.9       | 1 | 1955.7 | 75   | 3 | K.DASDDLDDLNFFNQK.K                                                                                           |
| gij5729939 re    |                    | 1        | 2        | 4.50%        | 269        | 30255        |   |        |      |   | 8.3 cleavage and polyadenylation specific factor 4, 30kD subunit [Homo sapiens]                               |
| *                | HsFLAG-Lin9_Ti_20  | 3.4613   | 0.1435   | 1447.97      | 1448.628   | 8192.7       | 1 | 1150.9 | 68.2 | 2 | R.GPRPLEQVTCYK.C                                                                                              |
| gij4507857 re    |                    | 3        | 3        | 4.40%        | 1102       | 128272       |   |        |      |   | 5.6 ubiquitin specific protease 7 (herpes virus-associated) [Homo sapiens]                                    |
| *                | HsFlag-VPS71_Ti_10 | 3.4297   | 0.3165   | 2489.17      | 2486.684   | 8276.3       | 1 | 614.8  | 42.1 | 1 | K.SFGWETLDSFMQHVDVQELCR.V                                                                                     |
| *                | HsFLAG-Lin9_Ti_20  | 3.4668   | 0.2101   | 1814.57      | 1813.98    | 7263.4       | 1 | 747.7  | 60.7 | 1 | R.SLNYCGHIYTPISCK.I                                                                                           |
| *                | HsFlag-VPS71_Ti_10 | 3.5354   | 0.2921   | 1498.62      | 1496.792   | 5439.5       | 1 | 496.1  | 62.5 | 1 | K.EVFGTFGIPFLLR.I                                                                                             |
| gij73747829 r    |                    | 3        | 6        | 4.40%        | 1009       | 112907       |   |        |      |   | 9 ligase III, DNA, ATP-dependent isoform alpha precursor [Homo sapiens]                                       |
| gij73747844 r    |                    | 3        | 6        | 4.60%        | 949        | 106018       |   |        |      |   | 9.2 ligase III, DNA, ATP-dependent isoform beta precursor [Homo sapiens]                                      |
|                  | HsFLAG-FLJ20729_   | 4.1116   | 0.3816   | 1702.92      | 1703.892   | 4872.2       | 1 | 984.2  | 71.4 | 1 | K.HVLDALDPNAYEAFK.A                                                                                           |
|                  | HsFLAG-p53-DNA-D   | 4.7876   | 0.3283   | 1734.51      | 1734.91    | 8936.5       | 1 | 1518   | 67.9 | 2 | R.VLHNAQEVEKEPQR.R                                                                                            |
|                  | HsFLAG-p53-DNA-D   | 3.802    | 0.3249   | 1453.43      | 1452.74    | 4274.8       | 1 | 855.5  | 73.1 | 3 | K.TGKPLPFGTLGVHK.K                                                                                            |
| <b>SHUFFLED_</b> | <b>g</b>           | <b>1</b> | <b>2</b> | <b>4.40%</b> | <b>641</b> | <b>68454</b> |   |        |      |   | <b>7.5 FALSE POSITIVE</b>                                                                                     |
| *                | HsFlag-ZnF-HIT2_Ti | 4.9199   | 0.1122   | 3016.47      | 3017.461   | 6901.9       | 6 | 559.1  | 27.8 | 2 | K.QQRPVVYFSGVVNLGAGALLSSNSPWLR.G                                                                              |
| gij16579828 r    |                    | 1        | 2        | 4.40%        | 570        | 63445        |   |        |      |   | 7.4 zinc finger protein 91 isoform 1 [Homo sapiens]                                                           |
| gij25777701 r    |                    | 1        | 2        | 4.70%        | 529        | 59571        |   |        |      |   | 8.2 zinc finger protein 91 isoform 2 [Homo sapiens]                                                           |
|                  | HsYL1_Ti_103.1375. | 3.0933   | 0.2031   | 2489.9       | 2490.692   | 4622.8       | 2 | 246.9  | 33.3 | 2 | K.AAPEEPQQRPEAVAAAPAGTTSSR.V                                                                                  |
| gij51477359 r    |                    | 1        | 2        | 4.40%        | 409        | 45080        |   |        |      |   | 7.4 PREDICTED: similar to Transcription factor Dp-1 (E2F dimerization partner 1) (DRTF1-polypeptide-1) (DRTF1 |
| gij89060602 r    |                    | 1        | 2        | 4.40%        | 409        | 45080        |   |        |      |   | 7.4 PREDICTED: similar to Transcription factor Dp-1 (E2F dimerization partner 1) (DRTF1-polypeptide-1) (DRTF1 |
| gij89060600 r    |                    | 1        | 2        | 4.40%        | 409        | 45080        |   |        |      |   | 7.4 PREDICTED: similar to Transcription factor Dp-1 (E2F dimerization partner 1) (DRTF1-polypeptide-1) (DRTF1 |
| gij89059461 r    |                    | 1        | 2        | 4.40%        | 409        | 45080        |   |        |      |   | 7.4 PREDICTED: similar to Transcription factor Dp-1 (E2F dimerization partner 1) (DRTF1-polypeptide-1) (DRTF1 |
| gij6005900 re    |                    | 1        | 2        | 4.40%        | 410        | 45070        |   |        |      |   | 6 transcription factor Dp-1 [Homo sapiens]                                                                    |
|                  | HsFLAG-Lin9_Ti_20  | 4.7989   | 0.4543   | 1774.72      | 1775.101   | 6618.8       | 1 | 1477.4 | 64.7 | 2 | K.GVVSLVAVHPSTVNPLGK.Q                                                                                        |
| gij73695475 r    |                    | 3        | 4        | 4.30%        | 2144       | 242368       |   |        |      |   | 6.5 protein BAP28 [Homo sapiens]                                                                              |
| *                | HsFLAG-Lin9_Ti_20  | 4.4778   | 0.3003   | 4475.35      | 4473.944   | 8135         | 1 | 769    | 21.2 | 1 | T                                                                                                             |
| *                | HsFLAG-Lin9_Ti_20  | 4.1357   | 0.1878   | 2830.24      | 2830.306   | 11378.2      | 1 | 1275.3 | 29   | 1 | R.AAIQCLQALSGVASPFYLIIDHLISK.A                                                                                |
| *                | HsFLAG-p53-DNA-D   | 6.2708   | 0.3776   | 2862.35      | 2863.37    | 5228.2       | 1 | 1181.4 | 39.6 | 2 | K.VVETLPHFISPYLEGILSQVHLEK.I                                                                                  |
| gij33946327 r    |                    | 4        | 11       | 4.30%        | 2090       | 213618       |   |        |      |   | 7.5 nucleoporin 214kDa [Homo sapiens]                                                                         |
| *                | HsFLAG-p53-DNA-D   | 3.5943   | 0.1412   | 1436.61      | 1436.654   | 6550.1       | 1 | 1127.8 | 77.3 | 1 | R.LNHLVDSLQQLR.L                                                                                              |
| *                | HsFLAG-p53-DNA-D   | 4.0847   | 0.2907   | 1775.72      | 1776.089   | 4764         | 1 | 728.3  | 62.5 | 3 | R.TPSIQPSLLPHAAPFAK.S                                                                                         |
| *                | HsFlag-VPS71_Ti_10 | 3.8087   | 0.4457   | 2252         | 2252.572   | 4175.4       | 1 | 521.4  | 50   | 4 | K.LGELLFPSSLAGETLGSFSGLR.V                                                                                    |
| *                | HsFlag-VPS71_Ti_10 | 4.9164   | 0.3919   | 3694.89      | 3693.921   | 10155.5      | 1 | 1301.2 | 24.3 | 3 | T                                                                                                             |
| gij40789229 r    |                    | 3        | 9        | 4.30%        | 1147       | 125869       |   |        |      |   | 9.6 splicing factor, arginine/serine-rich 15 [Homo sapiens]                                                   |
|                  | HsFLAG-Lin9_Ti_20  | 3.5924   | 0.3269   | 1332.43      | 1331.598   | 6349.2       | 1 | 1174.9 | 81.8 | 4 | K.VPGLYVIDSIVR.Q                                                                                              |

|               |                     |        |        |         |          |         |   |        |      |   |                                                                                                  |
|---------------|---------------------|--------|--------|---------|----------|---------|---|--------|------|---|--------------------------------------------------------------------------------------------------|
| *             | HsFLAG-Lin9_Ti_20   | 4.0909 | 0.3082 | 2063.5  | 2064.265 | 8634.8  | 1 | 1621.7 | 65.6 | 1 | K.NITATFQYLYLCPSEDK.S                                                                            |
| *             | HsFlag-DPCD_Ti_20   | 4.6013 | 0.4897 | 2113.73 | 2114.314 | 3605.9  | 1 | 712    | 63.2 | 4 | K.TVEPPISQVGNVDTASELEK.G                                                                         |
| gi 22027651 r |                     | 2      | 3      | 4.30%   | 949      | 104637  |   |        |      |   | 5.1 adaptor-related protein complex 1 beta 1 subunit isoform a [Homo sapiens]                    |
| gi 22027653 r |                     | 2      | 3      | 4.40%   | 942      | 103921  |   |        |      |   | 5.1 adaptor-related protein complex 1 beta 1 subunit isoform b [Homo sapiens]                    |
|               | HsFLAG-p53-DNA-D    | 2.2043 | 0.2471 | 947.45  | 948.117  | 6345.2  | 1 | 649.3  | 75   | 1 | R.KTAAVCVAK.L                                                                                    |
|               | HsFLAG-Lin9_Ti_20   | 5.2532 | 0.2541 | 3617.56 | 3618.032 | 10707.7 | 1 | 1633.5 | 28.2 | 2 | R.IDNADELLESFLEGFHDESTQVQLQLLTAIVK.L                                                             |
| gi 29826319 r |                     | 2      | 3      | 4.30%   | 737      | 80955   |   |        |      |   | 5.8 adducin 1 (alpha) isoform a [Homo sapiens]                                                   |
| gi 29826325 r |                     | 2      | 3      | 4.80%   | 662      | 73333   |   |        |      |   | 6.5 adducin 1 (alpha) isoform d [Homo sapiens]                                                   |
| gi 29826323 r |                     | 2      | 3      | 5.10%   | 631      | 69985   |   |        |      |   | 6.4 adducin 1 (alpha) isoform c [Homo sapiens]                                                   |
| gi 29826321 r |                     | 2      | 3      | 4.20%   | 768      | 84303   |   |        |      |   | 6 adducin 1 (alpha) isoform b [Homo sapiens]                                                     |
|               | HsFLAG-ARP6_Ti_1    | 2.6831 | 0.1224 | 1473.93 | 1474.7   | 4048.6  | 6 | 330.1  | 53.6 | 2 | R.AAVVTSPPTTAPHK.E                                                                               |
|               | HsFLAG-p53-DNA-D    | 3.1611 | 0.3588 | 1750.77 | 1750.035 | 7868.7  | 1 | 845.3  | 53.1 | 1 | K.CVVHIHTPAGAAVSAMK.C                                                                            |
| gi 4557871 re |                     | 2      | 3      | 4.30%   | 698      | 77050   |   |        |      |   | 7.1 transferrin [Homo sapiens]                                                                   |
| *             | HsFLAG-p53-DNA-D    | 4.7192 | 0.3972 | 2171.04 | 2172.455 | 4177.6  | 1 | 747.8  | 58.3 | 2 | R.SAGWNIPIGLLYCDLPEPR.K                                                                          |
| *             | HsFLAG-p53-DNA-D    | 3.6396 | 0.3432 | 1274.23 | 1274.419 | 8174.4  | 1 | 1345.9 | 85   | 1 | K.HSTIFENLANK.A                                                                                  |
| gi 4503971 re |                     | 1      | 8      | 4.30%   | 447      | 50583   |   |        |      |   | 5.1 GDP dissociation inhibitor 1 [Homo sapiens]                                                  |
| gi 6598323 re |                     | 1      | 8      | 4.30%   | 445      | 50663   |   |        |      |   | 6.5 GDP dissociation inhibitor 2 [Homo sapiens]                                                  |
|               | HsFLAG-ARP8_Ti_1    | 4.1773 | 0.5119 | 2142.57 | 2142.462 | 3891.3  | 1 | 662.7  | 58.3 | 8 | K.SPYLYPLYGLGELPQGFAR.L                                                                          |
| gi 21361144 r |                     | 1      | 2      | 4.30%   | 439      | 49204   |   |        |      |   | 5.2 proteasome 26S ATPase subunit 3 [Homo sapiens]                                               |
| *             | HsFLAG-ARP6_Ti_1    | 3.7723 | 0.22   | 2190.46 | 2190.519 | 7759.9  | 1 | 973.7  | 52.8 | 2 | R.TMLELLNQLDGFQPNQVK.V                                                                           |
| gi 41393554 r |                     | 1      | 3      | 4.30%   | 371      | 43728   |   |        |      |   | 9.9 LUC7-like isoform b [Homo sapiens]                                                           |
| gi 8922297 re |                     | 1      | 3      | 4.90%   | 325      | 38405   |   |        |      |   | 10 LUC7-like isoform a [Homo sapiens]                                                            |
|               | HsFlag-NUFIP_Ti_1   | 4.9638 | 0.4161 | 1865.98 | 1866.016 | 8362.3  | 1 | 2394   | 76.7 | 3 | K.SHLLDCCPHDILAGTR.M                                                                             |
| gi 42542392 r |                     | 2      | 3      | 4.20%   | 1054     | 120974  |   |        |      |   | 5.9 CCAAT/enhancer binding protein zeta [Homo sapiens]                                           |
| *             | HsYL1_Ti_102.3623.  | 3.7343 | 0.396  | 2400.67 | 2401.679 | 7580.5  | 1 | 810.1  | 42.9 | 2 | K.GAIDDLQQGELEAFIQLNLAK.Y                                                                        |
| *             | HsFLAG-p53-DNA-D    | 5.792  | 0.4088 | 2481.88 | 2481.852 | 10600.8 | 1 | 2161.3 | 57.1 | 1 | K.HLVAEFVQVLETLSHDTLVTTK.T                                                                       |
| gi 17999535 r |                     | 3      | 5      | 4.20%   | 1007     | 116973  |   |        |      |   | 10.3 serine/threonine-protein kinase PRP4K [Homo sapiens]                                        |
| gi 28872759 r |                     | 3      | 5      | 4.20%   | 1007     | 116973  |   |        |      |   | 10.3 serine/threonine-protein kinase PRP4K [Homo sapiens]                                        |
|               | HsFLAG-FLJ20729_    | 4.1927 | 0.2287 | 1386.98 | 1387.57  | 8747.6  | 1 | 1843.8 | 81.8 | 2 | K.LDDLALLEDEK.Q                                                                                  |
|               | HsFLAG-FLJ20729_    | 4.0917 | 0.3182 | 1484.98 | 1485.779 | 7322    | 1 | 1552.8 | 83.3 | 2 | K.DLLDQILMLDPAK.R                                                                                |
|               | HsFLAG-FLJ20729_    | 3.4577 | 0.2268 | 2010.53 | 2010.347 | 10127.6 | 1 | 842.9  | 50   | 1 | K.RISINQALQHAFIQEKI.-                                                                            |
| gi 29171734 r |                     | 3      | 3      | 4.20%   | 859      | 97208   |   |        |      |   | 9.2 eukaryotic translation initiation factor 2C, 2 [Homo sapiens]                                |
| *             | HsFLAG-TCF3_Ti_1    | 2.7288 | 0.286  | 1659.85 | 1659.794 | 5153.5  | 1 | 636.6  | 65.4 | 1 | K.SIEEQKPLTDSQR.V                                                                                |
| *             | HsFlag-FLJ90652_2   | 3.0476 | 0.2099 | 1408.27 | 1408.613 | 8706.6  | 2 | 769.5  | 63.6 | 1 | K.KLTDNQTSTMIR.A                                                                                 |
|               | HsFlag-les6_293_Ti_ | 3.2578 | 0.3108 | 1167.4  | 1167.31  | 5368.2  | 1 | 882.6  | 83.3 | 1 | K.AVQVHQDTLR.T                                                                                   |
| gi 33356174 r |                     | 2      | 7      | 4.20%   | 717      | 81614   |   |        |      |   | 7.2 pinin, desmosome associated protein [Homo sapiens]                                           |
| *             | HsFLAG-ARP6_Ti_1    | 3.7627 | 0.227  | 1316.57 | 1316.541 | 6608.2  | 1 | 1334.2 | 83.3 | 2 | K.KPALQSSVVATSK.E                                                                                |
| *             | HsFLAG-p53-DNA-D    | 3.7013 | 0.3663 | 1875.16 | 1875.172 | 5077.1  | 1 | 588.8  | 56.2 | 5 | K.LTEVPVEPVLTVHPESK.S                                                                            |
| gi 5902034 re |                     | 1      | 3      | 4.20%   | 501      | 55828   |   |        |      |   | 4.8 periodic tryptophan protein 1 [Homo sapiens]                                                 |
| *             | HsFLAG-TCF3_Ti_1    | 5.0388 | 0.3576 | 2410.59 | 2410.689 | 5291    | 1 | 931    | 57.5 | 3 | K.VQTLQFHPFEAQTLSIGSYDK.S                                                                        |
| gi 17511255 r |                     | 1      | 2      | 4.20%   | 479      | 53525   |   |        |      |   | 4.8 poly(A) binding protein interacting protein 1 isoform 1 [Homo sapiens]                       |
| gi 89062167 r |                     | 1      | 2      | 4.30%   | 461      | 51942   |   |        |      |   | 4.8 PREDICTED: similar to poly(A) binding protein interacting protein 1 isoform 1 [Homo sapiens] |
| gi 89041275 r |                     | 1      | 2      | 4.10%   | 488      | 54583   |   |        |      |   | 4.9 PREDICTED: similar to poly(A) binding protein interacting protein 1 isoform 1 [Homo sapiens] |

|                      |        |        |         |          |        |                                                                                                             |
|----------------------|--------|--------|---------|----------|--------|-------------------------------------------------------------------------------------------------------------|
| gij34452730 r        | 1      | 2      | 5.40%   | 367      | 42007  | 4.5 poly(A) binding protein interacting protein 1 isoform 3 [Homo sapiens]                                  |
| gij33386693 r        | 1      | 2      | 5.00%   | 400      | 45631  | 4.5 poly(A) binding protein interacting protein 1 isoform 2 [Homo sapiens]                                  |
| HsFLAG-ARP6_Ti_1     | 4.3212 | 0.3548 | 2277.97 | 2278.592 | 6905.4 | 1 857.2 52.6 2 R.ELLNALFSNPMDNLICAVK.L                                                                      |
| gij45356151 r        | 3      | 5      | 4.10%   | 1498     | 168890 | 7.5 KIAA0056 protein [Homo sapiens]                                                                         |
| * HsYL1_Ti_101.1860. | 3.89   | 0.3886 | 2107.56 | 2108.137 | 4643.5 | 1 660.8 55 2 R.SEPSGEINIDSSGETVGSGER.C                                                                      |
| * HsYL1_Ti_106.3087. | 3.1587 | 0.0992 | 1783.6  | 1784.195 | 3371.4 | 8 274.5 50 2 K.RNFIENIPIIISLK.T                                                                             |
| * HsYL1_Ti_105.2332. | 3.8513 | 0.2979 | 2891.16 | 2889.207 | 5865.7 | 2 509.3 26 1 R.SQGNDILCLSLPDKPPPQPPQWVNR.S                                                                  |
| gij42476127 r        | 2      | 3      | 4.10%   | 1133     | 127819 | 8.5 polymerase (RNA) III (DNA directed) polypeptide B [Homo sapiens]                                        |
| * HsFlag-NUFIP_Ti_1C | 3.5799 | 0.2956 | 1522.03 | 1521.841 | 9178.9 | 2 794.3 53.8 2 R.ELLASTILTHVPVK.E                                                                           |
| * HsFlag-NUFIP_Ti_1C | 3.5148 | 0.1731 | 3717.29 | 3718.132 | 5207.7 | 1 472.7 21.9 1 K.GVCGLIVPQEDMPFCDSGICPDIIMNPHGFPSR.M                                                        |
| gij24638454 r        | 3      | 5      | 4.10%   | 1042     | 114757 | 5.3 ATPase, Ca++ transporting, cardiac muscle, slow twitch 2 isoform 1 [Homo sapiens]                       |
| gij4502285 re        | 3      | 5      | 4.30%   | 997      | 109691 | 5.4 ATPase, Ca++ transporting, cardiac muscle, slow twitch 2 isoform 2 [Homo sapiens]                       |
| HsFLAG-ARP6_Ti_1     | 4.1977 | 0.4155 | 1541.59 | 1540.754 | 4644.2 | 1 1158.2 82.1 1 K.DIVPGDIVEIAVGDK.V                                                                         |
| HsFLAG-ARP6_Ti_1     | 4.513  | 0.4218 | 1621.54 | 1621.791 | 7846.3 | 1 1985 78.6 2 K.VGEATETALTCLVEK.M                                                                           |
| HsFLAG-ARP6_Ti_1     | 3.4603 | 0.3038 | 1527.03 | 1527.702 | 7300.2 | 1 867 66.7 2 K.SMSVYCTPNKPSR.T                                                                              |
| gij55769550 r        | 2      | 3      | 4.10%   | 948      | 106986 | 5.3 PHD finger protein 14 isoform 1 [Homo sapiens]                                                          |
| HsH2AZ-FLAG_293_     | 4.4668 | 0.413  | 2446.63 | 2447.623 | 9371.9 | 1 1692.4 57.1 2 K.EGLLSEAAAEEDIADPPFAYCK.Q                                                                  |
| * HsFLAG-TIP49b_Ti_  | 2.7116 | 0.1803 | 2063.67 | 2061.364 | 8942.6 | 9 371.5 43.8 1 R.LCYHFGCLDPPLKSPK.Q                                                                         |
| gij6912400 re        | 2      | 6      | 4.10%   | 822      | 92001  | 6.7 general transcription factor IIIC, polypeptide 4, 90kDa [Homo sapiens]                                  |
| * HsFlag-VPS71_Ti_1C | 4.9334 | 0.3643 | 2126.64 | 2126.371 | 8733.6 | 1 2009.1 63.9 5 K.TFEEAAQLLESSVQNLFK.Q                                                                      |
| * HsFLAG-p53-DNA-D   | 3.3846 | 0.2355 | 1726.63 | 1726.883 | 7794.4 | 1 990.2 64.3 1 K.TPSEALWKPTHEFSK.I                                                                          |
| gij13376204 r        | 2      | 4      | 4.10%   | 491      | 54503  | 8.3 Cas-Br-M (murine) ecotropic retroviral transforming sequence-like 1 [Homo sapiens]                      |
| * HsSrcap_Ti_204.207 | 3.7234 | 0.3131 | 2164.6  | 2165.454 | 5863.4 | 1 625.1 52.6 2 R.ASLNVHPPIAPPTEIPER.F                                                                       |
| * HsFLAG-UTX1_Ti_2i  | 4.1029 | 0.1439 | 2166.16 | 2165.454 | 6712.6 | 1 1421.7 42.1 2 R.ASLNVHPPIAPPTEIPER.F                                                                      |
| gij7661892 re        | 1      | 3      | 4.10%   | 482      | 53028  | 7 REST corepressor 1 [Homo sapiens]                                                                         |
| gij8922733 re        | 1      | 3      | 4.00%   | 495      | 55581  | 8.3 REST corepressor 3 [Homo sapiens]                                                                       |
| HsFlag-VPS71_Ti_1C   | 4.5966 | 0.4157 | 2321.92 | 2322.533 | 4602.7 | 1 802 60.5 3 K.SLADLPNFTFPFDEWTVEDK.V                                                                       |
| gij29727992 r        | 1      | 2      | 4.10%   | 315      | 35165  | 7.3 PREDICTED: similar to CG17293-PA [Homo sapiens]                                                         |
| gij88970733 r        | 1      | 2      | 4.10%   | 315      | 35165  | 7.3 PREDICTED: similar to CG17293-PA [Homo sapiens]                                                         |
| HsFLAG-FLJ20729_     | 3.2763 | 0.344  | 1513.18 | 1513.703 | 6715.6 | 1 865.1 70.8 2 K.HTGPITCLQFNPK.F                                                                            |
| gij28559039 r        | 3      | 4      | 4.00%   | 1581     | 168477 | 8.7 MEDIATOR_TRAP220 (peroxisome proliferator-activated receptor binding protein; PPARG binding protein; th |
| * HsFlag-VPS71_Ti_1C | 4.514  | 0.4495 | 2576.81 | 2576.874 | 7923.7 | 1 860.7 45.5 2 K.WTPSFSSITSANSVDLPACFFLK.F                                                                  |
| * HsFLAG-Lin9_Ti_20i | 4.1142 | 0.42   | 1745.38 | 1745.717 | 8332.6 | 1 1269 58.8 1 K.SHHSHSSSSSSASTSGK.M                                                                         |
| * HsFlag-VPS71_Ti_1C | 5.6551 | 0.4143 | 2013.69 | 2014.146 | 9548.6 | 1 1986.4 59.5 1 K.SPISSGSGGSHMSGTSSSSGMK.S                                                                  |
| gij15987121 r        | 3      | 11     | 4.00%   | 1297     | 143732 | 8.8 hypothetical protein LOC23223 [Homo sapiens]                                                            |
| * HsFLAG-Lin9_Ti_20i | 2.9323 | 0.2586 | 1272.45 | 1272.45  | 5087.7 | 1 693.4 66.7 2 K.APAHHPAAISTAK.F                                                                            |
| * HsFLAG-p53-DNA-D   | 3.5293 | 0.3265 | 1846.55 | 1847.207 | 6935.3 | 1 650.6 53.3 6 R.LGFFTTYFLPLANTLK.S                                                                         |
| * HsFLAG-p53-DNA-D   | 4.873  | 0.5093 | 2471.29 | 2472.849 | 6168.6 | 1 887.9 54.5 3 K.NFLPILFNLYGQPVAAGDTPAPR.R                                                                  |
| gij89037890 r        | 2      | 5      | 4.00%   | 600      | 64322  | 7.4 PREDICTED: similar to Ig gamma-1 chain C region [Homo sapiens]                                          |
| HsFLAG-p53-DNA-D     | 4.8632 | 0.1415 | 1808.66 | 1809.118 | 7769   | 1 1530.5 70 3 R.VVSVLTVLHQDWLNGK.E                                                                          |
| HsFLAG-p53-DNA-D     | 2.1089 | 0.1664 | 838.46  | 839.023  | 2475.3 | 8 276.6 71.4 2 K.ALPAPIEK.T                                                                                 |
| gij27363457 r        | 1      | 2      | 4.00%   | 544      | 60070  | 7.2 aarF domain containing kinase 4 [Homo sapiens]                                                          |
| * HsSrcap_Ti_202.566 | 4.1491 | 0.2063 | 2400.64 | 2399.793 | 8427.2 | 1 786.3 45.2 2 K.IQYPGIAQSIQSDVQNLAVLK.M                                                                    |

|                      |        |        |         |          |        |      |                                                                                    |
|----------------------|--------|--------|---------|----------|--------|------|------------------------------------------------------------------------------------|
| gi 48255889 r        | 1      | 3      | 4.00%   | 528      | 59425  | 4.4  | protein kinase C substrate 80K-H isoform 1 [Homo sapiens]                          |
| gi 48255891 r        | 1      | 3      | 4.00%   | 525      | 59178  | 4.4  | protein kinase C substrate 80K-H isoform 2 [Homo sapiens]                          |
| HsFlag-VPS71_Ti_10   | 4.0703 | 0.4669 | 2169.57 | 2169.358 | 6940.9 | 1    | 1133.5 55 3 K.LGGSPTSLGTWGSWIGPDHDK.F                                              |
| gi 21361875 r        | 1      | 2      | 4.00%   | 475      | 54855  | 4.9  | hypothetical protein LOC84946 [Homo sapiens]                                       |
| * HsFLAG-ARP6_Ti_1   | 4.0418 | 0.4325 | 2082.62 | 2082.315 | 9799.4 | 1    | 1266 55.6 2 K.LPSSVFASEFEEDVGLLNK.A                                                |
| gi 5031631 re        | 1      | 3      | 4.00%   | 478      | 54290  | 5.1  | scavenger receptor class B, member 2 [Homo sapiens]                                |
| * HsFLAG-ARP6_Ti_1   | 4.0263 | 0.3751 | 2266.59 | 2266.691 | 9076.6 | 1    | 920.2 50 3 R.TLNIPVLTVIEWSQVHFLR.E                                                 |
| gi 14861834 r        | 1      | 4      | 4.00%   | 423      | 46321  | 8.1  | cat eye syndrome chromosome region, candidate 5 isoform 2 precursor [Homo sapiens] |
| gi 21914862 r        | 1      | 4      | 4.30%   | 393      | 43588  | 6.9  | cat eye syndrome chromosome region, candidate 5 isoform 1 [Homo sapiens]           |
| HsFLAG-ARP6_Ti_1     | 5.3109 | 0.4387 | 1823.39 | 1824.133 | 7979.8 | 1    | 2369.5 78.1 4 R.VPVVFTNAGNILQHSK.A                                                 |
| gi 4506145 re        | 1      | 6      | 4.00%   | 247      | 26558  | 6.5  | protease, serine, 1 preproprotein [Homo sapiens]                                   |
| HsFLAG-ARP6_Ti_2     | 3.3391 | 0.1063 | 1175.49 | 1175.429 | 3327.3 | 1    | 569.8 83.3 6 K.TLNNDIMLIK.L                                                        |
| gi 24430146 r        | 3      | 6      | 3.90%   | 1475     | 153938 | 8.7  | nucleoporin 153kDa [Homo sapiens]                                                  |
| * HsYL1_Ti_106.1714. | 3.3796 | 0.2201 | 1372.13 | 1371.45  | 5821.6 | 3    | 642.3 66.7 2 R.SHLSQHTATSSK.K                                                      |
| * HsYL1_Ti_102.2444. | 4.034  | 0.3835 | 2515.86 | 2515.698 | 4404.7 | 1    | 475.3 42.3 2 R.ESGFSYPNFSLPAANGLSSGVGGGGGK.M                                       |
| * HsYL1_Ti_101.1638. | 4.9252 | 0.4481 | 1754.49 | 1754.761 | 7441.8 | 1    | 1630.7 67.6 2 K.GFDTSSSSNSAASSSFK.F                                                |
| gi 52630449 r        | 2      | 2      | 3.90%   | 1035     | 119032 | 6.1  | ubiquitin specific protease 48 isoform a [Homo sapiens]                            |
| HsFLAG-Lin9_Ti_20    | 4.4629 | 0.4232 | 1836.87 | 1836.953 | 9632.9 | 1    | 1247.4 59.4 1 K.ALGLDTGQQQDAQEFSK.L                                                |
| * HsFLAG-Lin9_Ti_20  | 3.1104 | 0.3886 | 2429.16 | 2428.835 | 8337.5 | 1    | 798.8 43.2 1 K.ILSDDCATLGLTGVIPESVILLK.A                                           |
| gi 41281437 r        | 1      | 2      | 3.90%   | 819      | 93557  | 5.8  | nucleoporin 93kDa [Homo sapiens]                                                   |
| * HsFLAG-p53-DNA-D   | 3.9649 | 0.3759 | 3414.67 | 3416.723 | 7352.4 | 1    | 778.2 25 2 R.ILHTLLASGEDALDFTQESEPSYISDVGPPGR.S                                    |
| gi 11496978 r        | 1      | 2      | 3.90%   | 335      | 37194  | 5    | nuclear transcription factor Y, gamma [Homo sapiens]                               |
| * HsFLAG-FLJ20729_   | 4.1382 | 0.3145 | 1625.77 | 1625.864 | 9532.9 | 1    | 1772.3 75 2 K.FDQFDFLIDIVPR.D                                                      |
| gi 41149143 r        | 1      | 3      | 3.90%   | 203      | 23619  | 10.9 | PREDICTED: similar to ribosomal protein L13a isoform 1 [Homo sapiens]              |
| gi 89037072 r        | 1      | 3      | 4.50%   | 178      | 20680  | 10.9 | PREDICTED: similar to ribosomal protein L13a isoform 3 [Homo sapiens]              |
| gi 89037070 r        | 1      | 3      | 3.90%   | 203      | 23443  | 10.8 | PREDICTED: similar to ribosomal protein L13a isoform 1 [Homo sapiens]              |
| gi 89037068 r        | 1      | 3      | 4.40%   | 181      | 21017  | 10.9 | PREDICTED: similar to ribosomal protein L13a isoform 2 [Homo sapiens]              |
| gi 89035384 r        | 1      | 3      | 3.90%   | 203      | 23299  | 10.3 | PREDICTED: similar to ribosomal protein L13a isoform 7 [Homo sapiens]              |
| gi 89035382 r        | 1      | 3      | 3.90%   | 203      | 23299  | 10.3 | PREDICTED: similar to ribosomal protein L13a isoform 6 [Homo sapiens]              |
| gi 89035380 r        | 1      | 3      | 3.90%   | 203      | 23299  | 10.3 | PREDICTED: similar to ribosomal protein L13a isoform 5 [Homo sapiens]              |
| gi 89035378 r        | 1      | 3      | 4.70%   | 171      | 20142  | 10.5 | PREDICTED: similar to ribosomal protein L13a isoform 4 [Homo sapiens]              |
| gi 89035375 r        | 1      | 3      | 4.40%   | 181      | 20847  | 10.4 | PREDICTED: similar to ribosomal protein L13a isoform 3 [Homo sapiens]              |
| gi 89035373 r        | 1      | 3      | 9.30%   | 86       | 10191  | 10.3 | PREDICTED: similar to ribosomal protein L13a isoform 2 [Homo sapiens]              |
| gi 89033544 r        | 1      | 3      | 5.60%   | 142      | 16773  | 10.8 | PREDICTED: similar to ribosomal protein L13a isoform 3 [Homo sapiens]              |
| gi 89033542 r        | 1      | 3      | 4.40%   | 181      | 21167  | 11.1 | PREDICTED: similar to ribosomal protein L13a isoform 2 [Homo sapiens]              |
| gi 89033540 r        | 1      | 3      | 3.90%   | 203      | 23619  | 10.9 | PREDICTED: similar to ribosomal protein L13a isoform 1 [Homo sapiens]              |
| gi 89031570 r        | 1      | 3      | 3.90%   | 203      | 23619  | 10.9 | PREDICTED: similar to ribosomal protein L13a isoform 5 [Homo sapiens]              |
| gi 89031568 r        | 1      | 3      | 5.60%   | 142      | 16773  | 10.8 | PREDICTED: similar to ribosomal protein L13a isoform 4 [Homo sapiens]              |
| gi 89031566 r        | 1      | 3      | 4.50%   | 178      | 20803  | 10.9 | PREDICTED: similar to ribosomal protein L13a isoform 3 [Homo sapiens]              |
| gi 89031563 r        | 1      | 3      | 4.40%   | 181      | 21167  | 11.1 | PREDICTED: similar to ribosomal protein L13a isoform 2 [Homo sapiens]              |
| gi 6912634 re        | 1      | 3      | 3.90%   | 203      | 23577  | 10.9 | ribosomal protein L13a [Homo sapiens]                                              |
| gi 41202038 r        | 1      | 3      | 3.90%   | 203      | 23299  | 10.3 | PREDICTED: similar to ribosomal protein L13a isoform 1 [Homo sapiens]              |
| HsFLAG-TCF3_Ti_10    | 2.1667 | 0.128  | 939.49  | 940.09   | 3537   | 2    | 439.2 71.4 3 R.LAHEVGWK.Y                                                          |



|                     |        |        |         |          |         |                                                                                                          |
|---------------------|--------|--------|---------|----------|---------|----------------------------------------------------------------------------------------------------------|
| gij32967603 r       | 3      | 3      | 3.80%   | 1556     | 178702  | 6.6 bromodomain adjacent to zinc finger domain, 1A isoform a [Homo sapiens]                              |
| * HsFLAG-Lin9_Ti_20 | 4.4348 | 0.3257 | 2367.54 | 2367.676 | 7733.8  | 1 1100.5 31.8 1 K.SALSAVASLAAAWPQLHQGCSLK.S                                                              |
| HsFlag-DPCD_Ti_20   | 3.1236 | 0.2924 | 1807.84 | 1806.889 | 6106.5  | 1 851.1 60 1 K.SANNTPENSPNFPNFR.V                                                                        |
| HsFlag-DPCD_Ti_20   | 4.0585 | 0.3315 | 2031.71 | 2032.304 | 7664.6  | 1 1268.8 57.9 1 K.LGLHVTPSNVDQVSTPPAAK.K                                                                 |
| gij18644728 r       | 2      | 2      | 3.80%   | 1146     | 127593  | 7.6 nucleolar RNA-associated protein alpha isoform [Homo sapiens]                                        |
| gij21218436 r       | 2      | 2      | 4.30%   | 1007     | 112304  | 7.7 nucleolar RNA-associated protein beta isoform [Homo sapiens]                                         |
| HsFLAG-Lin9_Ti_20   | 2.8461 | 0.1778 | 2164.95 | 2166.439 | 9645.5  | 3 454.6 39.5 1 R.VPSVPETELTDQAWLPAGVR.V                                                                  |
| HsFLAG-p53-DNA-D    | 4.1111 | 0.3054 | 2426.38 | 2427.895 | 4136.6  | 1 356.7 43.2 1 R.LLWGLEGLPLTVSAVQGAHPVLR.Y                                                               |
| gij20149524 r       | 3      | 3      | 3.80%   | 1087     | 121000  | 5.1 suppressor of Ty 5 homolog [Homo sapiens]                                                            |
| * HsFLAG-p53-DNA-D  | 3.2776 | 0.25   | 1135.5  | 1135.355 | 4997.3  | 1 1299.2 90 1 R.HLVLAGGSKPR.D                                                                            |
| * HsFLAG-FLJ20729_  | 2.5854 | 0.1617 | 1645.59 | 1645.776 | 7397.5  | 4 399.6 46.2 1 R.VELHSTCQTISVDR.Q                                                                        |
| * HsFlag-VPS71_Ti_1 | 4.2451 | 0.4388 | 1737.8  | 1737.991 | 7107.1  | 1 933.8 56.7 1 K.VVSISSEHLEPITPTK.N                                                                      |
| gij51873036 r       | 2      | 2      | 3.80%   | 1023     | 115935  | 6.9 oxoglutarate (alpha-ketoglutarate) dehydrogenase (lipoamide) isoform 1 precursor [Homo sapiens]      |
| HsFLAG-ARP6_Ti_1    | 3.5488 | 0.2591 | 2107.01 | 2106.343 | 5559.8  | 1 713.8 47.5 1 R.GSLAAVAHAQSLVEAQPNVDK.L                                                                 |
| * HsFLAG-p53-DNA-D  | 2.6482 | 0.2568 | 2155.99 | 2157.395 | 10594.9 | 1 674.4 47.1 1 K.HWLDSPWPGFFTLDGQPR.S                                                                    |
| gij7669501 re       | 1      | 2      | 3.80%   | 416      | 44773   | 9.1 lysosomal-associated membrane protein 1 [Homo sapiens]                                               |
| * HsFLAG-ARP6_Ti_1  | 4.393  | 0.316  | 1846.52 | 1847.167 | 6756.4  | 1 1009.5 63.3 2 R.FFLQGIQLNTILPDAR.D                                                                     |
| gij58761500 r       | 1      | 5      | 3.80%   | 396      | 44744   | 7.8 GTP-binding protein PTD004 isoform 1 [Homo sapiens]                                                  |
| * HsFLAG-ARP6_Ti_1  | 4.3156 | 0.3082 | 1569.11 | 1569.928 | 7454.6  | 1 1653 75 5 K.IPAFLNVVDIAGLVK.G                                                                          |
| gij18379349 r       | 1      | 2      | 3.80%   | 393      | 41920   | 6.3 vesicle amine transport protein 1 [Homo sapiens]                                                     |
| * HsFLAG-p53-DNA-D  | 3.6897 | 0.3123 | 1443.42 | 1443.689 | 3333.3  | 1 639.8 67.9 2 R.PAAPPAPGPGQLTLR.L                                                                       |
| gij5453591 re       | 3      | 3      | 3.70%   | 1197     | 135780  | 8.6 structural maintenance of chromosomes 2-like 1 [Homo sapiens]                                        |
| * HsFLAG-Lin9_Ti_20 | 3.3304 | 0.2734 | 2250.17 | 2250.566 | 9429.8  | 1 632.8 44.7 1 K.SNILDSICFLLGISNLSQVR.A                                                                  |
| * HsFLAG-Lin9_Ti_20 | 3.2252 | 0.3939 | 1624.97 | 1625.822 | 10538.3 | 1 1224 64.3 1 K.KITDGLHALQEASNK.D                                                                        |
| * HsYL1_Ti_101.1492 | 2.5129 | 0.16   | 1003.85 | 1003.097 | 3323    | 1 1050.3 93.8 1 K.DQEALEAVK.R                                                                            |
| gij24797086 r       | 3      | 4      | 3.70%   | 1115     | 125545  | 4.9 RAN binding protein 5 [Homo sapiens]                                                                 |
| * HsFLAG-p53-DNA-D  | 3.792  | 0.2986 | 1830.97 | 1831.125 | 8870.9  | 1 1248.5 59.4 2 R.ATAAFILANEHNVALFK.H                                                                    |
| * HsMRGBP-FLAG_Ti_1 | 3.3593 | 0.1398 | 1783.07 | 1783.124 | 7950    | 2 822.9 57.1 1 K.YLRPHLEATLQLSLK.L                                                                       |
| * HsFlag-FLJ90652_2 | 2.6538 | 0.181  | 1038.12 | 1038.192 | 5608.9  | 1 640.5 81.2 1 K.HIVENAVQK.E                                                                             |
| gij50980301 r       | 2      | 3      | 3.70%   | 1025     | 116533  | 6.2 myosin phosphatase-Rho interacting protein isoform 2 [Homo sapiens]                                  |
| gij50980307 r       | 2      | 3      | 3.70%   | 1038     | 118103  | 6.4 myosin phosphatase-Rho interacting protein isoform 1 [Homo sapiens]                                  |
| HsFLAG-Lin9_Ti_20   | 3.4661 | 0.299  | 1946.95 | 1946.124 | 6798.4  | 7 468.8 50 1 K.HVHPTTAPDVTSSLPEEK.N                                                                      |
| HsFLAG-Lin9_Ti_20   | 5.3448 | 0.5533 | 1830.57 | 1830.99  | 8940.1  | 1 1207.5 52.6 2 R.TLLTGDGGGEATGSPLAQGK.D                                                                 |
| gij73747799 r       | 1      | 2      | 3.70%   | 723      | 82221   | 6 suppressor of actin mutations 2-like [Homo sapiens]                                                    |
| * HsFLAG-TCF3_Ti_1  | 4.6043 | 0.3847 | 2760.18 | 2760.244 | 5347.6  | 1 914.6 46.2 2 K.LGELVDGLVVPSALVTAILEAPVTEPR.F                                                           |
| gij21361376 r       | 1      | 6      | 3.70%   | 464      | 49256   | 9.6 splicing factor 3a, subunit 2 [Homo sapiens]                                                         |
| * HsFLAG-p53-DNA-D  | 5.377  | 0.3406 | 2075.5  | 2075.43  | 9034.1  | 1 2068.8 71.9 6 R.WQYLLMAEPYETIAFK.V                                                                     |
| gij48255898 r       | 4      | 11     | 3.60%   | 1572     | 179280  | 7.3 SWI/SNF-related matrix-associated actin-dependent regulator of chromatin a2 isoform b [Homo sapiens] |
| gij48255900 r       | 4      | 11     | 3.60%   | 1590     | 181278  | 7.2 SWI/SNF-related matrix-associated actin-dependent regulator of chromatin a2 isoform a [Homo sapiens] |
| HsFLAG-FLJ20729_    | 3.1258 | 0.2775 | 1562.69 | 1563.8   | 6271.8  | 1 522.7 57.7 1 R.GPSPFPVQLHQLR.A                                                                         |
| HsARP6-FLAG_Ti_1    | 4.3946 | 0.2088 | 1618.2  | 1617.926 | 5797.2  | 1 1207.8 79.2 3 K.FNVLLTTYEYIIK.D                                                                        |
| HsARP6-FLAG_Ti_1    | 3.4162 | 0.2719 | 1512.2  | 1512.752 | 7683.9  | 1 1469.3 70.8 6 K.LTQVLNTHYVAPR.R                                                                        |
| HsFLAG-Lin9_Ti_20   | 3.0111 | 0.1977 | 2028.36 | 2029.516 | 8605    | 1 667.2 46.9 1 K.LPELWALLNFLTPTIFK.S                                                                     |

|                  |                          |               |               |                |                 |                                                                                     |
|------------------|--------------------------|---------------|---------------|----------------|-----------------|-------------------------------------------------------------------------------------|
| gi 4504555 re    | 3                        | 5             | 3.60%         | 1262           | 144480          | 6.1 isoleucine-tRNA synthetase [Homo sapiens]                                       |
| gi 7770072 re    | 3                        | 5             | 3.60%         | 1262           | 144480          | 6.1 isoleucine-tRNA synthetase [Homo sapiens]                                       |
|                  | HsFLAG-ARP6_Ti_1         | 3.3501        | 0.262         | 2165.87        | 2165.382        | 9384.8 1 795.6 50 1 K.ILEFWTEFNCFQECLK.Q                                            |
|                  | HsFLAG-ARP6_Ti_1         | 4.4777        | 0.532         | 1999.2         | 2000.273        | 6797 1 937.3 56.7 2 R.LLVATTFTHSYPFCWR.S                                            |
|                  | HsFLAG-ARP6_Ti_1         | 2.8649        | 0.2379        | 1399.26        | 1399.63         | 3839.3 3 437.7 62.5 2 K.APLKYPVSPSPDK.V                                             |
| gi 8923040 re    | 1                        | 3             | 3.60%         | 580            | 61125           | 9 collaborates/cooperates with ARF (alternate reading frame) protein [Homo sapiens] |
| *                | HsFLAG-FLJ20729_         | 4.7879        | 0.4971        | 1959.13        | 1959.031        | 6024.7 1 1397.6 60 3 R.SVSSQSSSSVSSQVTTAGSGK.A                                      |
| gi 7705853 re    | 1                        | 8             | 3.60%         | 523            | 56627           | 6.6 dynein light chain-A [Homo sapiens]                                             |
| *                | HsFLAG-TCF3_Ti_1         | 4.2695        | 0.4173        | 1927.74        | 1927.164        | 7230.7 1 766.8 50 8 K.AGATSEGVLANFFNSLLSK.K                                         |
| <b>SHUFFLED_</b> | <b>1</b>                 | <b>2</b>      | <b>3.60%</b>  | <b>364</b>     | <b>40315</b>    | <b>9.5 FALSE POSITIVE</b>                                                           |
| *                | <b>HsFLAG-TIP49b_Ti_</b> | <b>3.4627</b> | <b>0.1018</b> | <b>1414.64</b> | <b>1414.645</b> | <b>10380.8 3 1361 70.8 2 K.IERVPSAKELGSK.L</b>                                      |
| gi 33946282 r    | 5                        | 6             | 3.50%         | 1812           | 202023          | 5 hypothetical protein LOC25962 isoform 1 [Homo sapiens]                            |
|                  | HsARP6-FLAG_Ti_1         | 3.2212        | 0.2109        | 1396.51        | 1396.595        | 8028.9 1 984.1 70 1 R.FPCVVYINEVR.V                                                 |
|                  | HsARP6-FLAG_Ti_1         | 3.3777        | 0.2448        | 1613.08        | 1612.95         | 7728.7 1 1205 65.4 1 K.WVTALEEIPSLIIG                                               |
|                  | HsARP6-FLAG_Ti_1         | 4.3111        | 0.1876        | 1426.34        | 1426.74         | 8448.4 1 1961.6 86.4 1 K.LLELILLDQTVR.V                                             |
| *                | HsARP6-FLAG_Ti_1         | 3.2527        | 0.3396        | 1551.25        | 1551.826        | 5959.9 1 946.8 70.8 2 R.YAEIFQDLLALVR.S                                             |
| *                | HsARP6-FLAG_Ti_1         | 2.873         | 0.3019        | 1604.22        | 1603.787        | 9472.7 1 1239.8 65.4 1 K.DTGELASSFLEFMR.Q                                           |
| gi 20336290 r    | 2                        | 2             | 3.50%         | 1155           | 129438          | 8.5 DEAH (Asp-Glu-Ala-His) box polypeptide 30 isoform 2 [Homo sapiens]              |
| gi 20336294 r    | 2                        | 2             | 3.40%         | 1194           | 133938          | 8.8 DEAH (Asp-Glu-Ala-His) box polypeptide 30 isoform 1 [Homo sapiens]              |
|                  | HsFlag-NUFIP_Ti_1        | 4.0428        | 0.2401        | 2584.05        | 2583.898        | 8349 1 684.4 28.3 1 K.DSGPLSDPITGKPYVPLLEAEVLR.L                                    |
|                  | HsFlag-NUFIP_Ti_1        | 4.3429        | 0.2683        | 1900.84        | 1900.305        | 6756.3 1 1783.3 76.7 1 K.YLILPVHSNIPMMDQK.A                                         |
| gi 62244004 r    | 2                        | 2             | 3.50%         | 1016           | 115409          | 8.1 modulator of estrogen induced transcription isoform b [Homo sapiens]            |
| gi 63176611 r    | 2                        | 2             | 3.50%         | 1034           | 117149          | 7.9 modulator of estrogen induced transcription isoform a [Homo sapiens]            |
|                  | HsFLAG-Lin9_Ti_20        | 2.7849        | 0.2592        | 2273.5         | 2274.239        | 9379.7 3 485.5 44.4 1 K.DCELENQEAHEQDGNDELK.D                                       |
|                  | HsFLAG-p53-DNA-D         | 3.9914        | 0.2528        | 1979.79        | 1980.106        | 7650.1 1 656.1 53.1 1 R.KEWHGPPSQGPSYHDTR.R                                         |
| gi 31541941 r    | 2                        | 6             | 3.50%         | 839            | 94512           | 5.9 heat shock 70kDa protein 4-like [Homo sapiens]                                  |
| *                | HsFLAG-ARP6_Ti_1         | 4.062         | 0.4363        | 1913.1         | 1913.013        | 5146.7 1 1298.3 78.6 2 R.NFDEALVDYFCDEFK.T                                          |
|                  | HsFLAG-ARP6_Ti_1         | 5.0602        | 0.396         | 1537.59        | 1536.744        | 7693 1 1948.6 80.8 4 R.GCALQCAILSPAFAK.V                                            |
| gi 7705765 re    | 1                        | 2             | 3.50%         | 521            | 57708           | 7.5 WD repeat domain 50 [Homo sapiens]                                              |
| *                | HsFLAG-p53-DNA-D         | 4.3171        | 0.4184        | 1660.58        | 1660.83         | 5607.4 1 714.7 58.8 2 K.AGAGPGGPPQKAPSSQR.K                                         |
| gi 4503265 re    | 1                        | 3             | 3.50%         | 482            | 53487           | 8.5 dihydrolipoamide branched chain transacylase [Homo sapiens]                     |
| *                | HsFlag-NUFIP_Ti_1        | 3.2761        | 0.2627        | 1830.11        | 1830.236        | 6847.7 3 480.8 46.9 3 K.DMTVPILVSKPPVFTGK.D                                         |
| gi 4502005 re    | 2                        | 2             | 3.50%         | 367            | 39325           | 5.7 alpha-2-HS-glycoprotein [Homo sapiens]                                          |
| *                | HsFLAG-TCF3_Ti_1         | 3.9277        | 0.3722        | 1338.33        | 1338.293        | 5104.3 1 1187.1 86.4 1 K.CDSSPDSAEDVR.K                                             |
| *                | HsFLAG-TCF3_Ti_1         | 3.6924        | 0.2984        | 1466.3         | 1466.467        | 7544.7 1 1153.4 70.8 1 K.CDSSPDSAEDVRK.V                                            |
| gi 46430495 r    | 2                        | 2             | 3.40%         | 1021           | 113357          | 6.7 basonuclin 2 [Homo sapiens]                                                     |
| *                | HsFlag-NUFIP_Ti_2        | 3.632         | 0.2666        | 2562.77        | 2562.773        | 8372.3 1 736.5 29.8 1 K.VLMNSERPDENHSEPSHQDVIK.V                                    |
| *                | HsFlag-NUFIP_Ti_2        | 2.7356        | 0.0929        | 1457.31        | 1457.69         | 5881.2 1 1238.1 79.2 1 K.IYGAQHMPGLDVR.E                                            |
| gi 12746590 r    | 1                        | 2             | 3.40%         | 985            | 106208          | 8 C-terminal binding protein 2 isoform 2 [Homo sapiens]                             |
| gi 4557499 re    | 1                        | 2             | 7.40%         | 445            | 48945           | 6.9 C-terminal binding protein 2 isoform 1 [Homo sapiens]                           |
|                  | HsFLAG-Lin9_Ti_20        | 4.5245        | 0.2496        | 3532.05        | 3530.889        | 5511.2 1 484.5 23.4 2 K.AAGELGIAVCNIPSAAVEETADSTICHILNLYR.R                         |
| gi 11415036 r    | 2                        | 3             | 3.40%         | 794            | 88992           | 6.5 zinc finger protein 148 (pHZ-52) [Homo sapiens]                                 |
| *                | HsFLAG-Lin9_Ti_20        | 2.6254        | 0.1553        | 1740.59        | 1741.084        | 9447.1 7 466.6 43.3 1 R.LPQGLQYALNVPISVK.Q                                          |

|                 |                    |        |        |         |          |         |   |        |      |   |                                                                                                                   |
|-----------------|--------------------|--------|--------|---------|----------|---------|---|--------|------|---|-------------------------------------------------------------------------------------------------------------------|
| *               | HsYL1_Ti_105.1144. | 3.1649 | 0.3345 | 1282.5  | 1280.386 | 4391.9  | 1 | 824    | 80   | 2 | K.RYLQAASNNR.E                                                                                                    |
| gij 20149698 re |                    | 2      | 7      | 3.40%   | 705      | 79110   |   |        |      |   | 6.9 I(3)mbt-like 2 isoform a [Homo sapiens]                                                                       |
| *               | HsFLAG-TIP49b_Ti_  | 3.2666 | 0.302  | 1158.71 | 1159.219 | 6353.3  | 1 | 734.3  | 81.2 | 5 | K.RFCSVSCSR.S                                                                                                     |
| *               | HsFlag-DPCD_Ti_20  | 3.3245 | 0.2633 | 1596.15 | 1595.88  | 4692.4  | 8 | 491.4  | 57.1 | 2 | R.KISSEPVPEIIAVR.V                                                                                                |
| gij 21361171 re |                    | 1      | 3      | 3.40%   | 415      | 46974   |   |        |      |   | 6.1 brain and reproductive organ-expressed (TNFRSF1A modulator) isoform 1 [Homo sapiens]                          |
| gij 40353761 re |                    | 1      | 3      | 3.70%   | 383      | 43552   |   |        |      |   | 5.8 brain and reproductive organ-expressed (TNFRSF1A modulator) isoform 2 [Homo sapiens]                          |
| gij 40353759 re |                    | 1      | 3      | 3.70%   | 376      | 42697   |   |        |      |   | 5.4 brain and reproductive organ-expressed (TNFRSF1A modulator) isoform 3 [Homo sapiens]                          |
| gij 40353757 re |                    | 1      | 3      | 3.70%   | 383      | 43552   |   |        |      |   | 5.8 brain and reproductive organ-expressed (TNFRSF1A modulator) isoform 2 [Homo sapiens]                          |
| gij 40353755 re |                    | 1      | 3      | 3.70%   | 376      | 42697   |   |        |      |   | 5.4 brain and reproductive organ-expressed (TNFRSF1A modulator) isoform 3 [Homo sapiens]                          |
|                 | HsSrcap_Ti_202.366 | 4.2079 | 0.2955 | 1620.95 | 1620.929 | 6702.6  | 1 | 1239.5 | 73.1 | 3 | K.LPVDFSNIPTYLLK.D                                                                                                |
| gij 4759172 re  |                    | 2      | 6      | 3.30%   | 1148     | 128875  |   |        |      |   | 8.3 splicing factor, arginine/serine-rich 2, interacting protein [Homo sapiens]                                   |
| *               | HsYL1_Ti_101.1842. | 5.0637 | 0.4922 | 2326.62 | 2327.328 | 7585.5  | 1 | 1905.3 | 61.9 | 2 | K.SSSNDSVDEETAESDTPVLEK.E                                                                                         |
| *               | HsYL1_Ti_104.1178. | 3.6561 | 0.3952 | 1626.66 | 1626.72  | 5885.8  | 1 | 1182.4 | 73.3 | 4 | R.KPLSGNSNSGSESEFK.F                                                                                              |
| gij 4503525 re  |                    | 2      | 6      | 3.30%   | 913      | 105344  |   |        |      |   | 5.7 eukaryotic translation initiation factor 3, subunit 8, 110kDa [Homo sapiens]                                  |
| gij 89040127 re |                    | 2      | 6      | 3.30%   | 914      | 105473  |   |        |      |   | 5.6 PREDICTED: similar to eukaryotic translation initiation factor 3, subunit 8, 110kDa isoform 16 [Homo sapiens] |
| gij 89040125 re |                    | 2      | 6      | 3.30%   | 914      | 105473  |   |        |      |   | 5.6 PREDICTED: similar to eukaryotic translation initiation factor 3, subunit 8, 110kDa isoform 15 [Homo sapiens] |
| gij 89040121 re |                    | 2      | 6      | 3.80%   | 782      | 90161   |   |        |      |   | 5.7 PREDICTED: similar to eukaryotic translation initiation factor 3, subunit 8, 110kDa isoform 13 [Homo sapiens] |
| gij 89040101 re |                    | 2      | 6      | 3.30%   | 914      | 105473  |   |        |      |   | 5.6 PREDICTED: similar to eukaryotic translation initiation factor 3, subunit 8, 110kDa isoform 3 [Homo sapiens]  |
| gij 89040099 re |                    | 2      | 6      | 3.30%   | 914      | 105473  |   |        |      |   | 5.6 PREDICTED: similar to eukaryotic translation initiation factor 3, subunit 8, 110kDa isoform 2 [Homo sapiens]  |
| gij 89040097 re |                    | 2      | 6      | 3.30%   | 914      | 105473  |   |        |      |   | 5.6 PREDICTED: similar to eukaryotic translation initiation factor 3, subunit 8, 110kDa isoform 1 [Homo sapiens]  |
|                 | HsFlag-VPS71_Ti_10 | 5.5859 | 0.3467 | 1981.69 | 1980.179 | 7740.8  | 1 | 2796.1 | 80   | 5 | I.LADLEDYLNELWEDK.E                                                                                               |
|                 | HsARP6-FLAG_Ti_10  | 2.7713 | 0.1589 | 1496    | 1497.608 | 8345.9  | 1 | 839.2  | 57.7 | 1 | K.DAHNALLDIQSSGR.A                                                                                                |
| gij 4557469 re  |                    | 2      | 2      | 3.30%   | 937      | 104553  |   |        |      |   | 5.4 adaptor-related protein complex 2, beta 1 subunit isoform b [Homo sapiens]                                    |
| gij 71773106 re |                    | 2      | 2      | 3.30%   | 951      | 105692  |   |        |      |   | 5.3 adaptor-related protein complex 2, beta 1 subunit isoform a [Homo sapiens]                                    |
|                 | HsFLAG-p53-DNA-D   | 2.2043 | 0.2471 | 947.45  | 948.117  | 6345.2  | 1 | 649.3  | 75   | 1 | R.KTAAVCVAK.L                                                                                                     |
|                 | HsFlag-VPS71_Ti_10 | 2.7471 | 0.1869 | 2394.77 | 2394.86  | 8560.3  | 1 | 631.3  | 40.5 | 1 | K.KLAPPLVTLLSGEPEVQYVALR.N                                                                                        |
| gij 18201911 re |                    | 1      | 2      | 3.30%   | 478      | 54336   |   |        |      |   | 5.8 vitronectin precursor [Homo sapiens]                                                                          |
| *               | HsSrcap_Ti_204.188 | 2.6616 | 0.216  | 1666.58 | 1667.839 | 5348.9  | 9 | 369.1  | 46.7 | 2 | R.DWHGVPGQVDAAMAGR.I                                                                                              |
| gij 55769546 re |                    | 1      | 2      | 3.30%   | 392      | 43964   |   |        |      |   | 8.9 PAK1 interacting protein 1 [Homo sapiens]                                                                     |
| *               | HsFLAG-ARP6_Ti_10  | 3.2877 | 0.2217 | 1371.34 | 1371.579 | 8523.6  | 1 | 1307.8 | 70.8 | 2 | K.GQVTFLSIHPSGK.L                                                                                                 |
| gij 7706549 re  |                    | 2      | 4      | 3.20%   | 1490     | 164154  |   |        |      |   | 9.5 CDC2-related protein kinase 7 [Homo sapiens]                                                                  |
| *               | HsARP6-FLAG_Ti_10  | 3.4237 | 0.3057 | 1366.5  | 1365.616 | 7517.4  | 1 | 820.8  | 62.5 | 2 | K.TQVSVTAAIPLK.T                                                                                                  |
| *               | HsFlag-VPS71_Ti_10 | 4.1466 | 0.2425 | 3296.84 | 3295.506 | 4358.9  | 1 | 621    | 27.3 | 2 | K.LQNYGELGPGTTGASSGAGLHWGGPTQSSAYGK.L                                                                             |
| gij 89034039 re |                    | 2      | 2      | 3.20%   | 747      | 85105   |   |        |      |   | 4.9 PREDICTED: similar to heterogeneous nuclear ribonucleoprotein U [Homo sapiens]                                |
| gij 89034820 re |                    | 2      | 2      | 2.70%   | 904      | 101753  |   |        |      |   | 5.4 PREDICTED: similar to heterogeneous nuclear ribonucleoprotein U [Homo sapiens]                                |
|                 | HsFlag-NUFIP_Ti_11 | 2.715  | 0.2767 | 1051.28 | 1051.284 | 3470    | 4 | 411.7  | 75   | 1 | R.ALLPHVLCK.N                                                                                                     |
|                 | HsFLAG-p53-DNA-D   | 3.2236 | 0.3644 | 1733.44 | 1733.929 | 11543.9 | 1 | 924.3  | 57.1 | 1 | K.SRDLLVQQASQCLSK.L                                                                                               |
| gij 19923272 re |                    | 1      | 2      | 3.20%   | 696      | 81535   |   |        |      |   | 8.4 xenotropic and polytropic retrovirus receptor [Homo sapiens]                                                  |
| *               | HsFLAG-ARP6_Ti_10  | 3.2675 | 0.2059 | 2441.62 | 2442.611 | 4888.3  | 1 | 553.4  | 47.6 | 2 | K.DMLYSAQDQAPSVEVTDEDTVK.R                                                                                        |
| gij 7657013 re  |                    | 1      | 6      | 3.20%   | 560      | 63133   |   |        |      |   | 4.9 apoptosis antagonizing transcription factor [Homo sapiens]                                                    |
| *               | HsFLAG-UTX1_Ti_20  | 3.7131 | 0.2823 | 2045.02 | 2043.414 | 3704.6  | 1 | 388    | 52.9 | 6 | K.ALLTTNQLPQPDVFLFK.D                                                                                             |
| gij 26667180 re |                    | 1      | 2      | 3.20%   | 499      | 56369   |   |        |      |   | 7.2 calcium/calmodulin-dependent protein kinase II delta isoform 3 [Homo sapiens]                                 |
| gij 26667189 re |                    | 1      | 2      | 3.30%   | 478      | 54114   |   |        |      |   | 7.1 calcium/calmodulin-dependent protein kinase II delta isoform 2 [Homo sapiens]                                 |

|               |                     |        |        |         |          |         |                                                                               |
|---------------|---------------------|--------|--------|---------|----------|---------|-------------------------------------------------------------------------------|
| gi 26667186 r | 1                   | 2      | 3.30%  | 478     | 54128    | 7.3     | calcium/calmodulin-dependent protein kinase II delta isoform 1 [Homo sapiens] |
| gi 26667183 r | 1                   | 2      | 3.30%  | 478     | 54128    | 7.3     | calcium/calmodulin-dependent protein kinase II delta isoform 1 [Homo sapiens] |
|               | HsFLAG-ARP6_Ti_1    | 3.4073 | 0.3434 | 1783.83 | 1784.782 | 8700.6  | 1 994.1 56.7 2 K.ESTESSNTTIEDEDVK.A                                           |
| gi 88953910 r | 3                   | 3      | 3.10%  | 2354    | 265615   | 6.2     | PREDICTED: hypothetical protein LOC57683 [Homo sapiens]                       |
| gi 88959048 r | 3                   | 3      | 3.10%  | 2354    | 265615   | 6.2     | PREDICTED: hypothetical protein LOC57683 [Homo sapiens]                       |
|               | HsFLAG-p53-DNA-D    | 4.1873 | 0.2678 | 2711.96 | 2712.072 | 6322.6  | 2 608.7 29.2 1 K.SVFETSLDSDVPLQAATHKPEVIVK.E                                  |
|               | HsFLAG-TCF3_Ti_1    | 3.6087 | 0.3765 | 2423.37 | 2422.781 | 8745.7  | 1 660.2 40.5 1 K.GYVPSDSEIIVSNIPLQSVIK.Q                                      |
|               | HsFLAG-ARP6_Ti_1    | 4.9598 | 0.3905 | 2837.19 | 2837.158 | 8336.8  | 2 587.5 27 1 K.LGDFDVSYASHIPVQFVTDQSSVPVK.E                                   |
| gi 40807477 r | 2                   | 2      | 3.10%  | 1906    | 203350   | 8.8     | retinoic acid induced 1 [Homo sapiens]                                        |
| *             | HsFLAG-Lin9_Ti_20   | 4.0334 | 0.2822 | 3811.11 | 3812.35  | 11592.7 | 1 1207.2 24.3 1 K.LPENLLSDLSLQSLTALTSQVENISNTVQQLLSK.A                        |
| *             | HsH2AZ-FLAG_293_    | 3.8818 | 0.111  | 2303.52 | 2303.503 | 4737    | 5 466.5 30.4 1 K.GPECAAAATAGKPPRPDGPADPAK.Q                                   |
| gi 54124343 r | 2                   | 3      | 3.10%  | 1341    | 147183   | 4.8     | hypothetical protein LOC387680 [Homo sapiens]                                 |
| gi 89031067 r | 2                   | 3      | 3.60%  | 1148    | 125037   | 4.9     | PREDICTED: hypothetical protein LOC55747 isoform 1 [Homo sapiens]             |
| gi 89031065 r | 2                   | 3      | 5.80%  | 709     | 77846    | 6.6     | PREDICTED: hypothetical protein LOC55747 isoform 4 [Homo sapiens]             |
|               | HsFlag-VPS71_Ti_1   | 3.8375 | 0.4458 | 2458.12 | 2457.607 | 5107.6  | 1 654.1 47.7 2 K.LLEPSVGSFLGDEDDDLFSSAK.S                                     |
|               | HsFlag-VPS71_Ti_1   | 2.6276 | 0.1968 | 1959.05 | 1959.209 | 4972.2  | 8 265.6 41.2 1 K.GIWKPETPQDSSGLAPFK.T                                         |
| gi 5453998 re | 2                   | 3      | 3.10%  | 1038    | 119516   | 4.8     | importin 7 [Homo sapiens]                                                     |
| *             | HsFLAG-p53-DNA-D    | 4.9421 | 0.4179 | 1651.52 | 1652.051 | 6447.4  | 1 1319.5 71.4 2 R.SPLVAAMQHFLPVLK.D                                           |
| *             | HsSrcap_Ti_204.282  | 4.0146 | 0.389  | 2054.89 | 2056.245 | 6226.2  | 1 1246.3 68.8 1 R.NPVWYQALTHGLNEEQR.K                                         |
| gi 39725634 r | 2                   | 2      | 3.10%  | 1019    | 116465   | 9.1     | la related protein isoform 1 [Homo sapiens]                                   |
| gi 61102725 r | 2                   | 2      | 2.90%  | 1096    | 123510   | 8.8     | la related protein isoform 2 [Homo sapiens]                                   |
|               | HsFlag-NUFIP_Ti_1   | 3.6559 | 0.4626 | 2024.1  | 2025.228 | 6780.2  | 2 543.8 44.4 1 K.VGDFGDAINWPTPGEIAHK.S                                        |
|               | HsFLAG-ARP6_Ti_1    | 2.9295 | 0.3268 | 1487.75 | 1488.6   | 6715.8  | 1 640.1 62.5 1 K.WTSQHSNTQTLGK.-                                              |
| gi 7705365 re | 2                   | 2      | 3.10%  | 960     | 107305   | 6.4     | RNA binding motif protein 19 [Homo sapiens]                                   |
|               | HsFlag-NUFIP_Ti_11  | 2.9286 | 0.1659 | 1699.21 | 1699.108 | 4435.8  | 1 584.2 60.7 1 K.NVMEFLAPLKPVAIR.I                                            |
|               | HsFlag-NUFIP_Ti_11  | 2.9649 | 0.2782 | 1744.89 | 1743.076 | 7810.4  | 1 597.6 50 1 K.GFAFITFMFPEHAVK.A                                              |
| gi 14150171 r | 1                   | 4      | 3.10%  | 351     | 38772    | 6.1     | THO complex 3 [Homo sapiens]                                                  |
| gi 89071798 r | 1                   | 4      | 6.10%  | 179     | 19963    | 5       | PREDICTED: similar to THO complex subunit 3 (Tho3) [Homo sapiens]             |
|               | HsARP6-FLAG_Ti_1    | 3.8224 | 0.3585 | 1306.89 | 1306.471 | 5866.2  | 1 1320.9 90 4 K.RPLLAACDDK.D                                                  |
| gi 24415404 r | 10                  | 20     | 3.00%  | 5596    | 632827   | 5.7     | MDN1, midasin homolog [Homo sapiens]                                          |
| *             | HsSrcap_Ti_202.467  | 4.209  | 0.3603 | 1602.73 | 1602.878 | 6349    | 1 937.3 73.1 2 R.QCVLSTLAQLLLDK.D                                             |
| *             | HsH2AZ-FLAG_293_    | 4.4654 | 0.3327 | 1429.03 | 1429.61  | 9163.9  | 1 2592.7 90.9 2 R.LLEEALQLDLEK.A                                              |
| *             | HsH2AZ-FLAG_293_    | 3.3034 | 0.3162 | 1378.49 | 1378.624 | 4220.1  | 1 1010.1 77.3 1 K.LICQHIVPGNVK.S                                              |
| *             | HsSrcap_Ti_204.562  | 4.0416 | 0.3329 | 2529.63 | 2529.896 | 6627.1  | 1 1060.6 52.4 1 K.GYWIIDELNLAPTDVLEALNR.L                                     |
| *             | HsFLAG-ARP6_Ti_1    | 3.0266 | 0.2715 | 1295.28 | 1295.565 | 6835.9  | 1 838.5 70.8 1 K.KPILLEGSPGVGK.T                                              |
| *             | HsSrcap_Ti_202.373  | 4.7238 | 0.3223 | 2435.03 | 2433.675 | 10352.5 | 1 1505.4 50 1 R.INLSEQTDITDLFGADLPVEGGK.G                                     |
| *             | HsH2AZ-FLAG_293_    | 3.4513 | 0.2572 | 1682.59 | 1682.958 | 4373.2  | 1 535.7 60 1 R.LNALLEPGGVLTISER.G                                             |
| *             | HsSrcap_Ti_202.486  | 5.6453 | 0.4397 | 2478.75 | 2479.787 | 6714.3  | 1 1408.7 54.5 7 R.LVEGLDQFTGEVISSVSELQSLK.V                                   |
| *             | HsFLAG-ARP6_Ti_1    | 4.098  | 0.3717 | 2081.1  | 2082.142 | 5929.7  | 1 1277 64.7 2 K.DVSDQIGNEEQVEDTFQK.G                                          |
| *             | HsH2AZ-FLAG_293_    | 3.2633 | 0.2403 | 1514.34 | 1514.676 | 3189.4  | 3 468.4 69.2 2 R.DVNALPETLSDALR.Q                                             |
| gi 67782328 r | 2                   | 3      | 3.00%  | 1722    | 182686   | 7       | trinucleotide repeat containing 6B isoform 1 [Homo sapiens]                   |
|               | HsFlag-NUFIP_Ti_1   | 3.598  | 0.1211 | 3188.93 | 3187.534 | 9813.1  | 1 1133.4 26.6 1 K.VPEVTKPSLSQPTAASPIGSSPSPVNGGNAK.R                           |
| *             | Hs293Flag-les2_Ti_1 | 3.6958 | 0.3885 | 1990.62 | 1990.111 | 5322.4  | 1 763.8 58.8 2 K.GHPLPENQGNQAQPCWGR.S                                         |

|                      |        |        |         |          |        |                                                                                                |
|----------------------|--------|--------|---------|----------|--------|------------------------------------------------------------------------------------------------|
| gi 8923609 re        | 1      | 3      | 3.00%   | 608      | 68183  | 6.3 nuclear protein localization 4 [Homo sapiens]                                              |
| * HsFlag-VPS71_Ti_1( | 4.2854 | 0.4956 | 2024.61 | 2024.235 | 6022.3 | 1 1081.6 64.7 3 K.VFGAPNVVEDEIDQYLSK.Q                                                         |
| gi 24430149 r        | 2      | 3      | 2.90%   | 1391     | 155199 | 6.2 nucleoporin 155kDa isoform 1 [Homo sapiens]                                                |
| gi 4758844 re        | 2      | 3      | 3.00%   | 1332     | 149016 | 6.3 nucleoporin 155kDa isoform 2 [Homo sapiens]                                                |
| HsFLAG-Lin9_Ti_20(   | 3.3754 | 0.3353 | 1730.16 | 1728.946 | 9757.9 | 1 758.3 47.1 1 R.VASVSQNAIVSAAGNIAR.T                                                          |
| HsFlag-VPS71_Ti_1(   | 3.5335 | 0.3339 | 2488.97 | 2487.816 | 3020.9 | 2 223.3 40.5 2 R.EITAIESSVPCQLLESVLQELK.G                                                      |
| gi 38201619 r        | 3      | 7      | 2.90%   | 1403     | 154804 | 5.2 eukaryotic translation initiation factor 4 gamma, 1 isoform 4 [Homo sapiens]               |
| gi 38201627 r        | 3      | 7      | 2.70%   | 1512     | 166588 | 5.2 eukaryotic translation initiation factor 4 gamma, 1 isoform 2 [Homo sapiens]               |
| gi 38201625 r        | 3      | 7      | 2.90%   | 1435     | 158516 | 5.2 eukaryotic translation initiation factor 4 gamma, 1 isoform 3 [Homo sapiens]               |
| gi 38201623 r        | 3      | 7      | 2.60%   | 1599     | 175460 | 5.3 eukaryotic translation initiation factor 4 gamma, 1 isoform 1 [Homo sapiens]               |
| gi 38201621 r        | 3      | 7      | 2.60%   | 1599     | 175460 | 5.3 eukaryotic translation initiation factor 4 gamma, 1 isoform 1 [Homo sapiens]               |
| HsFlag-VPS71_Ti_1(   | 3.7941 | 0.2511 | 1478.3  | 1478.605 | 6431.5 | 1 1178.6 75 2 K.IHNAENIQPGEQK.Y                                                                |
| HsFLAG-FLJ20729_     | 2.9905 | 0.278  | 1589.71 | 1589.832 | 6173.6 | 4 509.1 57.7 2 K.VPTTEKPTVTVNFR.K                                                              |
| HsFlag-VPS71_Ti_1(   | 3.694  | 0.09   | 1515.54 | 1514.855 | 5990.4 | 1 1221.1 69.2 3 K.AASLLLEILGLLCK.S                                                             |
| gi 50658063 r        | 4      | 10     | 2.90%   | 1288     | 147182 | 6.8 SMC4 structural maintenance of chromosomes 4-like 1 isoform a [Homo sapiens]               |
| gi 50658067 r        | 4      | 10     | 4.00%   | 925      | 105722 | 8.6 SMC4 structural maintenance of chromosomes 4-like 1 isoform b [Homo sapiens]               |
| gi 50658065 r        | 4      | 10     | 2.90%   | 1288     | 147182 | 6.8 SMC4 structural maintenance of chromosomes 4-like 1 isoform a [Homo sapiens]               |
| HsSrcap_Ti_205.213   | 3.1936 | 0.3341 | 1758.6  | 1758.937 | 6771.6 | 1 644.1 62.5 1 K.NHVCQYYIYELQK.R                                                               |
| HsFlag-VPS71_Ti_1(   | 3.1418 | 0.2791 | 1098.58 | 1099.232 | 5149   | 1 644.5 77.8 4 R.HNTAVSQLTK.A                                                                  |
| HsYL1_Ti_104.1224.   | 3.0241 | 0.2609 | 1099.79 | 1099.232 | 5359.2 | 1 1088.7 83.3 4 R.HNTAVSQLTK.A                                                                 |
| HsYL1_Ti_105.2040.   | 4.5614 | 0.3988 | 1534.01 | 1532.783 | 7857.4 | 1 1808.2 80.8 1 K.RQNIGVATFIGLDK.M                                                             |
| gi 31083367 r        | 2      | 2      | 2.90%   | 974      | 110507 | 6.5 SEC8 protein [Homo sapiens]                                                                |
| * HsFlag-VPS71_Ti_1( | 3.6611 | 0.2581 | 1739.54 | 1738.759 | 9829.4 | 1 1578.7 67.9 1 R.TLSTSDDVEDRENEK.G                                                            |
| * HsFLAG-p53-DNA-D   | 2.7138 | 0.292  | 1551.13 | 1550.795 | 7880.6 | 1 900.4 70.8 1 K.HVLNLLDEIENIK.Q                                                               |
| gi 25777730 r        | 1      | 3      | 2.90%   | 517      | 57249  | 7 aldehyde dehydrogenase 1B1 precursor [Homo sapiens]                                          |
| * HsFLAG-TIP49b_Ti_  | 3.5126 | 0.2001 | 1716.96 | 1717.061 | 6959.7 | 1 765.7 57.1 3 R.IAKEEIFGPVQPLFK.F                                                             |
| gi 4753161 re        | 3      | 6      | 2.80%   | 2109     | 238417 | 7.4 general transcription factor IIIC, polypeptide 1, alpha 220kDa [Homo sapiens]              |
| * HsFLAG-p53-DNA-D   | 3.1665 | 0.128  | 2229.41 | 2227.577 | 6023.3 | 2 428 47.1 2 R.VPPFPLPLEPCTQEFLWR.A                                                            |
| * HsFLAG-Lin9_Ti_20( | 3.0388 | 0.1955 | 2121.31 | 2122.222 | 8813.5 | 2 536.8 42.5 1 R.AGVRPSSSGSAWEACSEAPSK.G                                                       |
| * HsFLAG-ARP6_Ti_1(  | 6.0039 | 0.4305 | 2238.3  | 2239.132 | 9156.8 | 1 2175.6 62.5 3 K.DGSLEDEDEEDDLDEGVGK.R                                                        |
| gi 18375626 r        | 4      | 6      | 2.80%   | 2157     | 228869 | 9.5 HLA-B associated transcript-2 isoform a [Homo sapiens]                                     |
| gi 18375628 r        | 4      | 6      | 2.80%   | 2145     | 227644 | 9.4 HLA-B associated transcript-2 isoform b [Homo sapiens]                                     |
| HsFLAG-KIAA0515_     | 3.0827 | 0.1453 | 840.29  | 839.97   | 3998.2 | 1 991.8 100 1 R.HGLQSLGK.V                                                                     |
| HsFLAG-KIAA0515_     | 2.466  | 0.0825 | 1164.3  | 1165.436 | 5127.9 | 9 530.4 65 2 R.MPPPANLPSLK.A                                                                   |
| HsFLAG-p53-DNA-D     | 4.1439 | 0.322  | 1730.64 | 1731.005 | 4287.1 | 2 561.3 62.5 2 K.RPPAAPENTPLVPSGVK.S                                                           |
| HsSrcap_Ti_205.224   | 2.5188 | 0.2269 | 2318.6  | 2319.666 | 4129.8 | 1 243 34.8 1 K.EGTLTQVPLAPPPPGAPPSPAPAR.F                                                      |
| gi 6005872 re        | 1      | 2      | 2.80%   | 760      | 87997  | 5.3 SEC63-like protein [Homo sapiens]                                                          |
| * HsSrcap_Ti_201.069 | 4.5549 | 0.3964 | 2291.37 | 2292.298 | 8923   | 1 719.4 45 2 K.EQSICAAEQPAEDGQGETNK.N                                                          |
| gi 21361437 r        | 2      | 3      | 2.80%   | 755      | 85853  | 4.4 HIV TAT specific factor 1 [Homo sapiens]                                                   |
| * HsFlag-VPS71_Ti_1( | 3.2171 | 0.1627 | 1714.27 | 1711.973 | 4188.2 | 1 426 53.8 1 K.FGIIMRDPQTEEFK.V                                                                |
| * HsFlag-VPS71_Ti_1( | 2.1066 | 0.0835 | 795.46  | 795.957  | 4078.7 | 7 453.8 75 2 K.LHVEVAK.F                                                                       |
| gi 29789006 r        | 1      | 2      | 2.80%   | 680      | 77861  | 6.7 pleckstrin homology domain containing, family C (with FERM domain) member 1 [Homo sapiens] |
| * HsFLAG-FLJ20729_   | 3.8096 | 0.3655 | 2051.44 | 2051.342 | 5120.2 | 1 609.2 52.8 2 K.TSTILGDITSIPELADYIK.V                                                         |

|                     |        |   |        |         |          |                                                                                                   |   |        |      |                                    |
|---------------------|--------|---|--------|---------|----------|---------------------------------------------------------------------------------------------------|---|--------|------|------------------------------------|
| gij71979932 r       | 1      | 2 | 2.80%  | 507     | 55010    | 7.7 solute carrier family 7 (cationic amino acid transporter, y+ system), member 5 [Homo sapiens] |   |        |      |                                    |
| * HsFLAG-ARP6_Ti_1  | 3.9493 |   | 0.4009 | 1456.27 | 1456.596 | 5326.1                                                                                            | 1 | 1227.7 | 80.8 | 2 R.ALAAPAAEEKEEAR.E               |
| gij33563340 r       | 4      | 5 | 2.70%  | 1995    | 228000   | 5.9 myosin, heavy polypeptide 14 [Homo sapiens]                                                   |   |        |      |                                    |
| HsFLAG-Lin9_Ti_20   | 3.8076 |   | 0.3868 | 2125.48 | 2126.205 | 8110.7                                                                                            | 1 | 708    | 44.7 | 1 R.EDQSILCTGESGAGKTENTK.K         |
| HsFLAG-ARP6_Ti_1    | 2.9294 |   | 0.2075 | 1543.17 | 1543.806 | 4525.3                                                                                            | 2 | 644.1  | 70.8 | 1 R.QRYEILTPNAIPK.G                |
| HsFLAG-ARP6_Ti_1    | 3.1298 |   | 0.1302 | 1258.36 | 1258.417 | 6831.5                                                                                            | 4 | 1016.2 | 80   | 1 R.KEEELQAALAR.A                  |
| HsFLAG-Lin9_Ti_20   | 3.416  |   | 0.1163 | 1220.85 | 1221.396 | 6427.8                                                                                            | 2 | 1186.2 | 83.3 | 2 R.KFDQLLAEEK.A                   |
| gij54112392 r       | 2      | 3 | 2.70%  | 1145    | 129269   | 5.7 calcium channel, voltage-dependent, alpha 2/delta subunit 2 isoform a [Homo sapiens]          |   |        |      |                                    |
| gij54112394 r       | 2      | 3 | 2.70%  | 1143    | 129085   | 5.7 calcium channel, voltage-dependent, alpha 2/delta subunit 2 isoform b [Homo sapiens]          |   |        |      |                                    |
| HsFLAG-ARP6_Ti_1    | 4.8294 |   | 0.4389 | 1690.12 | 1690.672 | 5790                                                                                              | 1 | 1896.3 | 82.1 | 1 K.ADAELDDPESEDVER.G              |
| HsFLAG-ARP6_Ti_1    | 3.783  |   | 0.4157 | 1828.62 | 1828.047 | 6286.4                                                                                            | 1 | 910.6  | 63.3 | 2 K.AQPVSCFTHLVQANVR.N             |
| gij13259508 r       | 2      | 2 | 2.70%  | 1144    | 127404   | 5.4 dynactin 1 isoform 2 [Homo sapiens]                                                           |   |        |      |                                    |
| gij13259510 r       | 2      | 2 | 2.40%  | 1278    | 141694   | 5.8 dynactin 1 isoform 1 [Homo sapiens]                                                           |   |        |      |                                    |
| HsFLAG-p53-DNA-D    | 4.2002 |   | 0.3398 | 1661.04 | 1660.914 | 8039.2                                                                                            | 1 | 1872.6 | 80.8 | 1 R.LHISQLQHENSILK.G               |
| HsFlag-VPS71_Ti_1   | 2.6181 |   | 0.1731 | 1753.58 | 1754.94  | 4832.1                                                                                            | 1 | 345.1  | 53.1 | 1 K.LSHEGPGSELPAALYR.K             |
| gij4505933 re       | 2      | 2 | 2.70%  | 1107    | 123635   | 7 polymerase (DNA directed), delta 1, catalytic subunit 125kDa [Homo sapiens]                     |   |        |      |                                    |
| * HsFLAG-FLJ20729_  | 2.8563 |   | 0.0924 | 1594.55 | 1594.948 | 8717.6                                                                                            | 2 | 887.5  | 57.1 | 1 R.LALTLRPCAPILGAK.V              |
| * HsMRGBP-FLAG_Ti   | 2.5744 |   | 0.0962 | 1924.87 | 1927.214 | 4151.3                                                                                            | 2 | 312.7  | 53.6 | 1 K.KVRKDLEDQEQLLR.F               |
| gij30181238 r       | 1      | 2 | 2.70%  | 733     | 81790    | 8 N2,N2-dimethylguanosine tRNA methyltransferase-like [Homo sapiens]                              |   |        |      |                                    |
| * HsFLAG-FLJ20729_  | 3.8968 |   | 0.3831 | 2182.27 | 2182.524 | 7281.8                                                                                            | 1 | 705.8  | 47.4 | 2 K.TAIELGPLWSSSLFNTGFLK.R         |
| gij24497603 r       | 1      | 3 | 2.70%  | 522     | 53255    | 5.3 nucleoporin 62kDa [Homo sapiens]                                                              |   |        |      |                                    |
| gij24497609 r       | 1      | 3 | 2.70%  | 522     | 53255    | 5.3 nucleoporin 62kDa [Homo sapiens]                                                              |   |        |      |                                    |
| gij24497607 r       | 1      | 3 | 2.70%  | 522     | 53255    | 5.3 nucleoporin 62kDa [Homo sapiens]                                                              |   |        |      |                                    |
| gij24497605 r       | 1      | 3 | 2.70%  | 522     | 53255    | 5.3 nucleoporin 62kDa [Homo sapiens]                                                              |   |        |      |                                    |
| HsFLAG-p53-DNA-D    | 4.1648 |   | 0.2086 | 1627.65 | 1627.872 | 4767.1                                                                                            | 1 | 1305.1 | 84.6 | 3 K.ELEDLLSPLEELVK.E               |
| gij17505234 r       | 1      | 2 | 2.70%  | 440     | 49324    | 9.9 nucleolar and spindle associated protein 1 isoform 2 [Homo sapiens]                           |   |        |      |                                    |
| gij7705951 re       | 1      | 2 | 5.30%  | 226     | 24980    | 10.8 nucleolar and spindle associated protein 1 isoform 1 [Homo sapiens]                          |   |        |      |                                    |
| HsFlag-VPS71_Ti_1   | 2.7546 |   | 0.3285 | 1140.55 | 1141.269 | 4969.7                                                                                            | 1 | 627.3  | 72.7 | 2 K.SAHVTVSGGTPK.G                 |
| gij89041101 r       | 1      | 3 | 2.70%  | 375     | 40778    | 8.7 PREDICTED: hypothetical protein XP_944530 [Homo sapiens]                                      |   |        |      |                                    |
| HsFLAG-TIP49b_Ti_   | 1.8805 |   | 0.159  | 1094.3  | 1094.256 | 3958.4                                                                                            | 1 | 310.5  | 66.7 | 3 R.SAYATQLALR.M                   |
| gij14790190 r       | 5      | 7 | 2.60%  | 3664    | 402251   | 7.6 spen homolog, transcriptional regulator [Homo sapiens]                                        |   |        |      |                                    |
| * HsFLAG-Lin9_Ti_20 | 4.0665 |   | 0.3964 | 1767.01 | 1767.079 | 8080.7                                                                                            | 1 | 945.6  | 56.2 | 2 K.TPVQAAAVSIVEKPVTR.K            |
| * HsFlag-NUFIP_Ti_2 | 3.5599 |   | 0.2618 | 1833.46 | 1833.996 | 4672                                                                                              | 4 | 350.7  | 46.9 | 2 K.NSAADLEHPEPSLPLSR.T            |
| * HsFlag-NUFIP_Ti_2 | 3.4112 |   | 0.3211 | 1968.38 | 1969.202 | 8348.9                                                                                            | 1 | 858.3  | 50   | 1 K.VDATRPEATTEVGPQIGVK.E          |
| * HsFLAG-Lin9_Ti_20 | 3.7595 |   | 0.3671 | 2775.22 | 2774.317 | 6243.4                                                                                            | 1 | 691.8  | 27.8 | 1 K.PAPQTLTGLVSALTGLVNVSLVPVNALK.G |
| * HsFLAG-ARP6_Ti_1  | 3.2327 |   | 0.1129 | 1478.22 | 1478.553 | 5942.5                                                                                            | 1 | 901.8  | 70.8 | 1 R.DQEDVVSQTESLK.A                |
| gij33620775 r       | 2      | 3 | 2.60%  | 1357    | 156275   | 5.6 kinectin 1 [Homo sapiens]                                                                     |   |        |      |                                    |
| * HsFLAG-ARP6_Ti_1  | 2.8752 |   | 0.2863 | 1512.06 | 1510.731 | 6093.8                                                                                            | 2 | 520.4  | 62.5 | 1 K.GELTTLIHQLEK.D                 |
| * HsFLAG-ARP6_Ti_1  | 4.6941 |   | 0.475  | 2266.33 | 2267.319 | 5538                                                                                              | 1 | 927.5  | 54.8 | 2 K.AAGDTTVIENS DVSPETESSEK.E      |
| gij15451892 r       | 2      | 5 | 2.60%  | 1220    | 138929   | 5.5 translation initiation factor IF2 [Homo sapiens]                                              |   |        |      |                                    |
| * HsFLAG-Lin9_Ti_20 | 2.6235 |   | 0.1442 | 1750.96 | 1750.061 | 8080.9                                                                                            | 1 | 545.3  | 53.3 | 1 K.LRAPIICVLGHVDTGK.T             |
| * HsFLAG-p53-DNA-D  | 4.5071 |   | 0.4003 | 1915.13 | 1916.227 | 7412.2                                                                                            | 1 | 1795.1 | 73.3 | 4 R.IFSAEIIYHLFDAFTK.Y             |
| gij24496789 r       | 2      | 2 | 2.60%  | 1176    | 134411   | 7.2 leucyl-tRNA synthetase [Homo sapiens]                                                         |   |        |      |                                    |

|               |                    |        |        |         |          |         |   |        |      |   |                                                                                                         |
|---------------|--------------------|--------|--------|---------|----------|---------|---|--------|------|---|---------------------------------------------------------------------------------------------------------|
| *             | HsFLAG-FLJ20729_   | 2.8876 | 0.1765 | 1926.11 | 1925.105 | 6277.2  | 3 | 426    | 46.7 | 1 | R.SFITTDVNPYYDSFVR.W                                                                                    |
| *             | HsARP6-FLAG_Ti_1   | 3.08   | 0.2217 | 1509.54 | 1509.7   | 7460.1  | 1 | 629.5  | 53.8 | 1 | K.STGNFLTTLQAIK.F                                                                                       |
| gi 8922557 re | 1                  | 2      | 2.60%  | 796     | 88945    |         |   |        |      |   | 5.2 solute carrier family 4 (anion exchanger), member 1, adaptor protein [Homo sapiens]                 |
| *             | HsFlag-VPS71_Ti_1  | 3.6743 | 0.3658 | 2155.75 | 2156.317 | 6366.3  | 2 | 369.8  | 40   | 2 | R.SLQEEQSRPTTAVSSPGGP.A                                                                                 |
| gi 4503131 re | 2                  | 3      | 2.60%  | 781     | 85497    |         |   |        |      |   | 5.9 catenin (cadherin-associated protein), beta 1, 88kDa [Homo sapiens]                                 |
| gi 88968770 r | 2                  | 3      | 2.80%  | 702     | 77207    |         |   |        |      |   | 6.6 PREDICTED: similar to Beta-catenin isoform 10 [Homo sapiens]                                        |
| gi 88968766 r | 2                  | 3      | 2.60%  | 770     | 84277    |         |   |        |      |   | 6 PREDICTED: similar to catenin (cadherin-associated protein), beta 1, 88kDa isoform 9 [Homo sapiens]   |
| gi 88968756 r | 2                  | 3      | 3.10%  | 653     | 71424    |         |   |        |      |   | 6.7 PREDICTED: similar to Beta-catenin isoform 6 [Homo sapiens]                                         |
| gi 88968752 r | 2                  | 3      | 2.60%  | 781     | 85497    |         |   |        |      |   | 5.9 PREDICTED: similar to catenin (cadherin-associated protein), beta 1, 88kDa isoform 5 [Homo sapiens] |
| gi 88968749 r | 2                  | 3      | 2.60%  | 781     | 85497    |         |   |        |      |   | 5.9 PREDICTED: similar to catenin (cadherin-associated protein), beta 1, 88kDa isoform 4 [Homo sapiens] |
| gi 88968746 r | 2                  | 3      | 2.60%  | 781     | 85497    |         |   |        |      |   | 5.9 PREDICTED: similar to catenin (cadherin-associated protein), beta 1, 88kDa isoform 2 [Homo sapiens] |
| gi 88968743 r | 2                  | 3      | 2.90%  | 694     | 75927    |         |   |        |      |   | 6.6 PREDICTED: similar to catenin (cadherin-associated protein), beta 1, 88kDa isoform 3 [Homo sapiens] |
|               | HsFLAG-ARP6_Ti_1   | 3.3002 | 0.271  | 1084.4  | 1084.322 | 5502.2  | 1 | 1307.5 | 83.3 | 1 | K.AAVMVHQLSK.K                                                                                          |
|               | HsFLAG-ARP6_Ti_1   | 3.463  | 0.25   | 1303.54 | 1303.513 | 7930    | 1 | 1399.4 | 88.9 | 2 | R.LVQNCLWTLR.N                                                                                          |
| gi 4758786 re | 1                  | 3      | 2.60%  | 463     | 52546    |         |   |        |      |   | 7.6 NADH dehydrogenase (ubiquinone) Fe-S protein 2, 49kDa (NADH-coenzyme Q reductase) [Homo sapiens]    |
| *             | HsFLAG-ARP6_Ti_1   | 3.8608 | 0.4233 | 1197.2  | 1197.379 | 7728    | 1 | 1952.6 | 86.4 | 3 | K.APGFAHLAQLDK.M                                                                                        |
| gi 55741641 r | 2                  | 4      | 2.50%  | 1771    | 196541   |         |   |        |      |   | 6.6 kinase D-interacting substance of 220 kDa [Homo sapiens]                                            |
| *             | HsFLAG-ARP6_Ti_1   | 3.7103 | 0.2967 | 2308.7  | 2307.445 | 10506.7 | 1 | 977.4  | 45   | 2 | K.NGANCNLEDLDNWTALISASK.E                                                                               |
| *             | HsFLAG-ARP6_Ti_1   | 2.8465 | 0.2986 | 2399.18 | 2398.611 | 10210.3 | 1 | 729.1  | 40.9 | 2 | R.LSSVGGETSLAEMIATLSDACER.E                                                                             |
| gi 32490572 r | 2                  | 3      | 2.50%  | 1087    | 120677   |         |   |        |      |   | 5.2 erythrocyte membrane protein band 4.1-like 3 [Homo sapiens]                                         |
| *             | HsFLAG-ARP6_Ti_1   | 2.5489 | 0.2137 | 1280.61 | 1280.428 | 10611.4 | 6 | 778.1  | 60   | 1 | R.SGAWHFSFNVK.F                                                                                         |
| *             | HsFLAG-ARP6_Ti_1   | 4.2028 | 0.403  | 1886.35 | 1886.114 | 7545.7  | 1 | 843.3  | 56.7 | 2 | K.IRPGEFEQFESTIGFK.L                                                                                    |
| gi 30410720 r | 1                  | 4      | 2.50%  | 894     | 101982   |         |   |        |      |   | 6.6 Sec3 isoform 1 [Homo sapiens]                                                                       |
| gi 67944634 r | 1                  | 4      | 2.50%  | 894     | 101982   |         |   |        |      |   | 6.6 Sec3 isoform 1 [Homo sapiens]                                                                       |
|               | HsFlag-VPS71_Ti_1  | 3.9547 | 0.4545 | 2413.42 | 2414.803 | 7284.4  | 1 | 1167.3 | 52.4 | 4 | K.VGILPFVAEFEEFAGLAESIFK.N                                                                              |
| gi 21361397 r | 1                  | 2      | 2.50%  | 632     | 71027    |         |   |        |      |   | 8.9 Rac GTPase activating protein 1 [Homo sapiens]                                                      |
| *             | HsFLAG-FLJ20729_   | 2.8565 | 0.3197 | 1733.07 | 1733.061 | 7249.1  | 1 | 440    | 43.3 | 2 | K.VSLLGPVTTPEHQLLK.T                                                                                    |
| gi 15150805 r | 1                  | 3      | 2.50%  | 522     | 56688    |         |   |        |      |   | 5.6 transducin beta-like 1Y [Homo sapiens]                                                              |
| gi 5032159 re | 1                  | 3      | 2.30%  | 577     | 62496    |         |   |        |      |   | 6.6 transducin beta-like 1X [Homo sapiens]                                                              |
| gi 19913371 r | 1                  | 3      | 2.50%  | 514     | 55595    |         |   |        |      |   | 5.6 nuclear receptor co-repressor/HDAC3 complex subunit [Homo sapiens]                                  |
| gi 19913367 r | 1                  | 3      | 2.50%  | 522     | 56688    |         |   |        |      |   | 5.6 transducin beta-like 1Y [Homo sapiens]                                                              |
| gi 19913365 r | 1                  | 3      | 2.50%  | 522     | 56688    |         |   |        |      |   | 5.6 transducin beta-like 1Y [Homo sapiens]                                                              |
|               | HsFlag-VPS71_Ti_1  | 3.6623 | 0.3194 | 1459.71 | 1459.602 | 9459.2  | 1 | 1484.1 | 70.8 | 3 | K.TFQGHTNEVNAIK.W                                                                                       |
| gi 61676188 r | 5                  | 8      | 2.40%  | 4374    | 481896   |         |   |        |      |   | 5.2 HECT, UBA and WWE domain containing 1 [Homo sapiens]                                                |
| *             | HsFLAG-ARP6_Ti_1   | 3.8769 | 0.4843 | 1960.42 | 1961.235 | 4726    | 1 | 354.9  | 47.1 | 3 | R.EVLGSLPNVFSALCLNAR.G                                                                                  |
| *             | HsFLAG-ARP6_Ti_1   | 3.7654 | 0.2935 | 1632.45 | 1631.875 | 7563.6  | 2 | 878    | 64.3 | 2 | K.LPGGVQNFQFSALR.F                                                                                      |
| *             | HsFLAG-ARP6_Ti_1   | 3.2818 | 0.361  | 1817.73 | 1818.207 | 3874.8  | 1 | 488.6  | 62.5 | 1 | K.TTPLKPSPLPVPIDTIK.E                                                                                   |
| *             | HsFLAG-ARP6_Ti_1   | 3.6156 | 0.2742 | 2238.55 | 2238.59  | 5113.3  | 1 | 760.5  | 38.1 | 1 | R.LLGPAAADILQLSSSLPLQSR.G                                                                               |
| *             | HsFLAG-ARP6_Ti_1   | 4.5921 | 0.2303 | 3544.17 | 3544.986 | 9250    | 1 | 747.7  | 23.4 | 1 | R.ESQLAHIKDEPPPLSPAPLTPATPSSLDPPFFSR.E                                                                  |
| gi 12229217 r | 1                  | 2      | 2.40%  | 1102    | 123563   |         |   |        |      |   | 7.3 activity-dependent neuroprotector [Homo sapiens]                                                    |
| gi 31563503 r | 1                  | 2      | 2.40%  | 1102    | 123563   |         |   |        |      |   | 7.3 activity-dependent neuroprotector [Homo sapiens]                                                    |
|               | HsSrcap_Ti_205.150 | 4.8169 | 0.4439 | 2439.81 | 2440.673 | 6143.8  | 1 | 690.5  | 42   | 2 | R.VLGQSSSKPAAAATGPPPGNTSSTQK.W                                                                          |
| gi 21071058 r | 2                  | 5      | 2.40%  | 1052    | 121933   |         |   |        |      |   | 8.1 SWI/SNF-related matrix-associated actin-dependent regulator of chromatin a5 [Homo sapiens]          |

|                  |                    |          |          |              |            |              |   |        |      |                                                                                           |
|------------------|--------------------|----------|----------|--------------|------------|--------------|---|--------|------|-------------------------------------------------------------------------------------------|
| *                | HsFLAG-p53-DNA-D   | 3.5544   | 0.2747   | 1729.16      | 1729.976   | 7398.2       | 1 | 955.3  | 67.9 | 3 K.QTELFAHFQIPAAQK.T                                                                     |
|                  | HsFLAG-Lin9_Ti_200 | 3.289    | 0.3611   | 1054.8       | 1055.181   | 9211.4       | 1 | 1677.8 | 88.9 | 2 R.HGATHVFASK.E                                                                          |
| gi 5453660 re    |                    | 1        | 7        | 2.40%        | 907        | 103571       |   |        |      | 8.1 spindle pole body protein [Homo sapiens]                                              |
| *                | HsFLAG-ARP6_Ti_1   | 5.2868   | 0.5067   | 2354.57      | 2355.477   | 8131.4       | 1 | 1985.8 | 61.9 | 7 K.SAESPQDAADLFTDLENAFQGK.I                                                              |
| gi 33356547 r    |                    | 1        | 4        | 2.40%        | 904        | 101896       |   |        |      | 5.5 minichromosome maintenance protein 2 [Homo sapiens]                                   |
| *                | HsFlag-VPS71_Ti_1  | 5.3056   | 0.3681   | 2539.52      | 2539.635   | 7238.8       | 1 | 1177   | 50   | 4 R.ATEDGEEDEEMIESIENLEDLK.G                                                              |
| gi 26051278 r    |                    | 1        | 2        | 2.40%        | 984        | 99037        |   |        |      | 9.8 nuclear pore membrane protein 121 [Homo sapiens]                                      |
| *                | HsSrcap_Ti_205.168 | 4.5321   | 0.4688   | 2363.91      | 2361.657   | 5646.3       | 1 | 787.6  | 52.2 | 2 K.APPTLQAETATKPQATSAPSPAPK.Q                                                            |
| gi 45439306 r    |                    | 1        | 2        | 2.40%        | 501        | 57136        |   |        |      | 6.5 aspartyl-tRNA synthetase [Homo sapiens]                                               |
| *                | HsFLAG-ARP6_Ti_1   | 3.4348   | 0.3779   | 1399.99      | 1400.725   | 6576.6       | 1 | 1183.1 | 77.3 | 2 R.VTMLFLGLHNVR.Q                                                                        |
| gi 22538461 r    |                    | 3        | 5        | 2.30%        | 2440       | 270207       |   |        |      | 7.1 nuclear receptor co-repressor 1 [Homo sapiens]                                        |
| *                | HsSrcap_Ti_204.202 | 3.7468   | 0.372    | 2564.13      | 2565.806   | 11078.6      | 1 | 1012.6 | 45.2 | 1 R.SSHLEVSQASQLLQQQQQQQLR.R                                                              |
| *                | HsYL1_Ti_106.2388. | 3.1003   | 0.2946   | 1769.92      | 1769.14    | 4027.8       | 4 | 342.2  | 46.9 | 3 R.VSAAVLPLVHPLPEGLR.A                                                                   |
| *                | HsYL1_Ti_104.3378. | 3.3388   | 0.3265   | 2129.14      | 2129.43    | 7347         | 1 | 1173.1 | 55.9 | 1 R.LITLADHICQIITQDFAR.N                                                                  |
| gi 88953403 r    |                    | 4        | 5        | 2.30%        | 1758       | 197486       |   |        |      | 6.3 PREDICTED: similar to RAN-binding protein 2-like 1 isoform 1 isoform 1 [Homo sapiens] |
| gi 88953419 r    |                    | 4        | 5        | 2.30%        | 1760       | 197624       |   |        |      | 6.5 PREDICTED: similar to RAN-binding protein 2-like 1 isoform 1 isoform 9 [Homo sapiens] |
| gi 88953417 r    |                    | 4        | 5        | 2.30%        | 1766       | 198381       |   |        |      | 6.5 PREDICTED: similar to RAN-binding protein 2-like 1 isoform 1 isoform 8 [Homo sapiens] |
| gi 88953415 r    |                    | 4        | 5        | 2.30%        | 1757       | 197284       |   |        |      | 6.4 PREDICTED: similar to RAN-binding protein 2-like 1 isoform 1 isoform 7 [Homo sapiens] |
| gi 88953409 r    |                    | 4        | 5        | 2.80%        | 1412       | 157861       |   |        |      | 6.2 PREDICTED: similar to RAN-binding protein 2-like 1 isoform 1 isoform 4 [Homo sapiens] |
|                  | HsFlag-VPS71_Ti_1  | 3.2897   | 0.217    | 1788.65      | 1786.936   | 8271.5       | 1 | 833.8  | 50   | 1 K.SGQSALYDALFSSSQSPK.D                                                                  |
|                  | HsScrap_Ti_105.186 | 2.7444   | 0.1612   | 1335.54      | 1336.577   | 4894.7       | 1 | 431.7  | 70   | 1 R.LLVQHEINTLR.A                                                                         |
|                  | HsFlag-VPS71_Ti_1  | 3.2882   | 0.2649   | 1336.77      | 1336.577   | 5684.3       | 1 | 918.2  | 80   | 2 R.LLVQHEINTLR.A                                                                         |
|                  | HsARP6-FLAG_Ti_1   | 3.1594   | 0.1779   | 1388.03      | 1388.693   | 4109.2       | 7 | 557    | 72.7 | 1 R.LLLDIPLQTPHK.L                                                                        |
| gi 42716280 r    |                    | 2        | 3        | 2.30%        | 1268       | 141439       |   |        |      | 6.9 high density lipoprotein binding protein [Homo sapiens]                               |
| gi 4885409 re    |                    | 2        | 3        | 2.30%        | 1268       | 141439       |   |        |      | 6.9 high density lipoprotein binding protein [Homo sapiens]                               |
|                  | HsFlag-VPS71_Ti_1  | 3.8773   | 0.3502   | 1727.81      | 1725.985   | 6091         | 1 | 809.4  | 57.1 | 2 K.ASVITQVFHVPLEER.K                                                                     |
|                  | HsFlag-NUFIP_Ti_2  | 3.8892   | 0.3095   | 1616.23      | 1615.869   | 8648.9       | 1 | 1041.5 | 65.4 | 1 K.FPEVIINFPDPAQK.S                                                                      |
| gi 28373117 r    |                    | 1        | 2        | 2.30%        | 1018       | 113320       |   |        |      | 5.9 contactin 1 isoform 1 precursor [Homo sapiens]                                        |
| gi 28373119 r    |                    | 1        | 2        | 2.30%        | 1007       | 111867       |   |        |      | 5.8 contactin 1 isoform 2 precursor [Homo sapiens]                                        |
|                  | HsFLAG-ARP6_Ti_1   | 4.6126   | 0.3638   | 2594.89      | 2595.865   | 6244.1       | 1 | 810.9  | 47.7 | 2 K.GFGPIFEEQPINTIYPEESLEGK.V                                                             |
| gi 48762926 r    |                    | 1        | 2        | 2.30%        | 919        | 102452       |   |        |      | 6.1 PWP2 periodic tryptophan protein homolog [Homo sapiens]                               |
| *                | HsFLAG-p53-DNA-D   | 3.4887   | 0.2029   | 2285.75      | 2285.629   | 12472.7      | 1 | 1117.6 | 45   | 2 R.LLDVLSGHEGPISGLCFNPMK.S                                                               |
| <b>SHUFFLED_</b> | <b>g</b>           | <b>1</b> | <b>2</b> | <b>2.30%</b> | <b>619</b> | <b>71527</b> |   |        |      | <b>5.9 FALSE POSITIVE</b>                                                                 |
| *                | HsFLAG-ARP5_Ti_1   | 4.4493   | 0.1137   | 1590.05      | 1591.684   | 8065.6       | 3 | 1581.3 | 51.9 | 2 K.DEQTLNTANGCLVR.E                                                                      |
| gi 4506787 re    |                    | 2        | 3        | 2.20%        | 1657       | 189251       |   |        |      | 6.5 IQ motif containing GTPase activating protein 1 [Homo sapiens]                        |
| *                | HsFLAG-ARP6_Ti_1   | 3.7948   | 0.4099   | 1883.15      | 1884.137   | 7964.7       | 1 | 720.3  | 50   | 2 R.ILAIGLINEALDEGDAQK.T                                                                  |
| *                | HsFLAG-ARP6_Ti_1   | 3.6512   | 0.1219   | 1970.28      | 1970.274   | 10403.5      | 1 | 1498.7 | 55.9 | 1 K.SKVDQIQEIVTGNPTVIK.M                                                                  |
| gi 38016947 r    |                    | 2        | 5        | 2.20%        | 1676       | 188304       |   |        |      | 6.5 complement component 5 [Homo sapiens]                                                 |
| *                | HsSrcap_Ti_204.183 | 2.7056   | 0.2583   | 1253.45      | 1253.528   | 5629.9       | 3 | 717.1  | 75   | 2 K.TLLPVSKPEIR.S                                                                         |
| *                | HsSrcap_Ti_202.489 | 4.7611   | 0.3852   | 2840.55      | 2841.144   | 9112         | 1 | 1198.3 | 44   | 3 R.YGGGFYSTQDTINAIEGLTEYSLLVK.Q                                                          |
| gi 21735569 r    |                    | 2        | 3        | 2.20%        | 1339       | 151093       |   |        |      | 4.8 claspin [Homo sapiens]                                                                |
| *                | HsSrcap_Ti_206.179 | 3.2349   | 0.2701   | 1368.45      | 1368.533   | 8708.9       | 1 | 1164.8 | 70.8 | 2 K.KLDGASHTKPGEK.L                                                                       |
| *                | HsSrcap_Ti_201.073 | 3.8992   | 0.3124   | 1683.33      | 1683.769   | 8357.1       | 1 | 912.7  | 60   | 1 K.FTSQDASTPASSELNK.Q                                                                    |



|             |                    |        |        |         |          |         |                                                                              |
|-------------|--------------------|--------|--------|---------|----------|---------|------------------------------------------------------------------------------|
| gi 53759103 | r                  | 1      | 2      | 2.20%   | 1037     | 119938  | 5.2 importin 8 [Homo sapiens]                                                |
| *           | HsFlag-FLJ90652_2  | 3.3739 | 0.3397 | 2537.73 | 2538.813 | 7927    | 1 623.4 38.6 2 K.FDIFEDYASPTTAAQTLLYTAAK.K                                   |
| gi 50582989 | r                  | 1      | 2      | 2.20%   | 963      | 108314  | 6.9 IQ motif and Sec7 domain 1 [Homo sapiens]                                |
| *           | HsFLAG-TCF3_Ti_1   | 5.0171 | 0.4955 | 2227.89 | 2227.346 | 7951.4  | 1 1294.8 57.5 2 K.SPAPSSDFADAITELEDAFSR.Q                                    |
| gi 50658082 | r                  | 1      | 2      | 2.20%   | 597      | 69752   | 5.7 centrosomal protein 70 kDa [Homo sapiens]                                |
| *           | HsFLAG-ARP6_Ti_1   | 3.8955 | 0.2464 | 1484.12 | 1484.779 | 3863.2  | 3 733.7 75 2 K.TLSAELVPWLNK.K                                                |
| gi 46358364 | r                  | 1      | 2      | 2.20%   | 498      | 56581   | 7.8 beta 3-glycosyltransferase-like [Homo sapiens]                           |
| *           | HsFLAG-UTX1_Ti_2   | 2.8914 | 0.1636 | 1324.7  | 1324.65  | 4678.3  | 7 456.8 65 2 R.IQIPKLETLR.R                                                  |
| gi 4557525  | re                 | 1      | 2      | 2.20%   | 509      | 54150   | 7.7 dihydrolipoamide dehydrogenase precursor [Homo sapiens]                  |
| *           | HsFLAG-ARP6_Ti_1   | 3.5707 | 0.404  | 1128.66 | 1128.36  | 7296.1  | 1 1190.9 80 2 K.ALTGGIAHLFK.Q                                                |
| gi 50233868 | r                  | 2      | 4      | 2.10%   | 1460     | 164341  | 5.4 hypothetical protein LOC22897 [Homo sapiens]                             |
| *           | HsFlag-FLJ90652_2  | 4.288  | 0.4014 | 2150.35 | 2151.434 | 9111.6  | 1 1104.1 52.6 3 R.ISEHLLDVLSPVLGGACR.Q                                       |
| *           | HsFlag-FLJ90652_2  | 2.8442 | 0.091  | 1259.84 | 1260.39  | 5916.9  | 5 623.6 72.2 1 K.LREELESQK.A                                                 |
| gi 62243696 | r                  | 2      | 2      | 2.10%   | 1258     | 144427  | 5.6 stromal antigen 1 [Homo sapiens]                                         |
| *           | HsFLAG-Lin9_Ti_20  | 2.5404 | 0.2239 | 2159.2  | 2156.419 | 11177.8 | 1 823.1 44.1 1 R.DIALLDLINFQICSGCR.G                                         |
|             | HsFlag-VPS71_Ti_1  | 1.8636 | 0.2099 | 959.5   | 960.136  | 5058.6  | 1 424.4 68.8 1 R.HTSTLAAMK.L                                                 |
| gi 42741679 | r                  | 1      | 2      | 2.10%   | 856      | 98082   | 6.6 ATPase, H+ transporting, lysosomal V0 subunit a isoform 2 [Homo sapiens] |
| *           | HsFLAG-ARP6_Ti_1   | 3.1214 | 0.3425 | 1800.37 | 1800.062 | 6523.2  | 2 647.9 52.9 2 R.ADIPLPEGEASPPAPPLK.Q                                        |
| gi 19743813 | r                  | 1      | 2      | 2.10%   | 798      | 88415   | 5.4 integrin beta 1 isoform 1A precursor [Homo sapiens]                      |
| gi 19743823 | r                  | 1      | 2      | 2.10%   | 798      | 88415   | 5.4 integrin beta 1 isoform 1A precursor [Homo sapiens]                      |
| gi 19743821 | r                  | 1      | 2      | 2.10%   | 819      | 91035   | 5.4 integrin beta 1 isoform 1C-2 precursor [Homo sapiens]                    |
| gi 19743819 | r                  | 1      | 2      | 2.10%   | 801      | 88884   | 5.5 integrin beta 1 isoform 1D precursor [Homo sapiens]                      |
| gi 19743817 | r                  | 1      | 2      | 2.10%   | 825      | 91620   | 5.4 integrin beta 1 isoform 1C-1 precursor [Homo sapiens]                    |
| gi 19743815 | r                  | 1      | 2      | 2.20%   | 789      | 87446   | 5.5 integrin beta 1 isoform 1B precursor [Homo sapiens]                      |
|             | HsFLAG-ARP6_Ti_1   | 4.6791 | 0.32   | 2020.52 | 2020.38  | 7086.8  | 1 1283.6 68.8 2 K.LKPEDITQIQPQLVLR.L                                         |
| gi 41281573 | r                  | 1      | 2      | 2.10%   | 780      | 84674   | 9.2 bromo adjacent homology domain containing 1 [Homo sapiens]               |
| *           | HsH2AZ-FLAG_293_   | 2.8426 | 0.3296 | 1709    | 1709.899 | 2981.4  | 7 236.2 53.3 2 K.TALVPPSADYSTPPHR.T                                          |
| gi 13376259 | r                  | 1      | 2      | 2.10%   | 656      | 75019   | 5.6 nucleoporin 85 [Homo sapiens]                                            |
| *           | HsFLAG-ARP6_Ti_1   | 2.8126 | 0.2381 | 1631.81 | 1631.875 | 9845.6  | 1 921.3 57.7 2 K.LFNESHGIFLGLQR.I                                            |
| gi 4505055  | re                 | 1      | 2      | 2.10%   | 512      | 58574   | 7.1 v-yes-1 Yamaguchi sarcoma viral related oncogene homolog [Homo sapiens]  |
| *           | HsFLAG-ARP6_Ti_1   | 3.2613 | 0.2637 | 1164.13 | 1164.211 | 4231.3  | 3 784.2 80 2 K.DSLSDDGVDLK.T                                                 |
| gi 56549668 | r                  | 2      | 4      | 2.00%   | 1835     | 197390  | 7.4 AT rich interactive domain 2 (ARID, RFX-like) [Homo sapiens]             |
| *           | HsFlag-NUFIP_Ti_2  | 3.5887 | 0.3161 | 2055.55 | 2057.354 | 5619.4  | 1 815.5 55.3 3 R.AVVAQHVA PPPGIVEIDSEK.F                                     |
| *           | HsFLAG-p53-DNA-D   | 2.8624 | 0.0905 | 1869.54 | 1870.029 | 7928.4  | 4 518.5 50 1 K.RPAEDTDRET VAGIPNK.V                                          |
| gi 54859722 | r                  | 2      | 2      | 2.00%   | 1436     | 162121  | 5.5 nucleoporin 160kDa [Homo sapiens]                                        |
| *           | HsFLAG-ARP6_Ti_1   | 3.6432 | 0.2529 | 1217.54 | 1217.5   | 5706.9  | 1 1357.2 95 1 R.NPIHAIGLLIR.E                                                |
| *           | HsFLAG-ARP6_Ti_1   | 3.5412 | 0.4218 | 2061.56 | 2062.314 | 10280.5 | 1 512.4 44.1 1 R.MNLTQLYGSNTAGYIVCR.G                                        |
| gi 44888822 | r                  | 2      | 4      | 2.00%   | 1424     | 152587  | 7.3 hypothetical protein LOC23248 [Homo sapiens]                             |
| *           | HsARP6-FLAG_Ti_1   | 2.9359 | 0.2481 | 1561.94 | 1560.788 | 4249.3  | 1 613.1 64.3 2 R.ESFADVLPEAAALVK.D                                           |
| *           | HsARP6-FLAG_Ti_1   | 4.2568 | 0.2642 | 1488.54 | 1487.734 | 3924.5  | 2 773.6 76.9 2 K.VEITPESILSALS.K.T                                           |
| gi 40254967 | r                  | 1      | 2      | 2.00%   | 1315     | 143709  | 6.6 hypothetical protein LOC79832 [Homo sapiens]                             |
| *           | HsYL1_Ti_102.3831. | 4.0061 | 0.3808 | 2664.63 | 2665.923 | 8975.7  | 1 913.2 40 2 R.NILSNVDDILAATAAACGVTPTDFSK.S                                  |
| gi 24308033 | r                  | 1      | 3      | 2.00%   | 1015     | 110064  | 4.7 formin binding protein 4 [Homo sapiens]                                  |

|             |                           |        |        |         |          |        |   |        |      |   |                                                                                    |
|-------------|---------------------------|--------|--------|---------|----------|--------|---|--------|------|---|------------------------------------------------------------------------------------|
| *           | HsYL1_Ti_101.1274.        | 4.4932 | 0.4801 | 2050.29 | 2050.017 | 5992.5 | 1 | 788.3  | 50   | 3 | K.TGTDSNSTESSETSTGSLCK.E                                                           |
| gi 17505907 | r                         | 1      | 2      | 2.00%   | 851      | 94087  |   |        |      |   | 10 DEAD (Asp-Glu-Ala-Asp) box polypeptide 31 isoform 1 [Homo sapiens]              |
| gi 20336298 | r                         | 1      | 2      | 2.90%   | 585      | 64137  |   |        |      |   | 9.9 DEAD (Asp-Glu-Ala-Asp) box polypeptide 31 isoform 2 [Homo sapiens]             |
|             | HsFlag-VPS71_Ti_101.1274. | 3.7851 | 0.2895 | 1823.21 | 1823.097 | 8343.9 | 1 | 588.5  | 46.9 | 2 | R.LADISLHDPVSISVLDK.S                                                              |
| gi 17999541 | r                         | 1      | 2      | 2.00%   | 796      | 91707  |   |        |      |   | 5.5 vacuolar protein sorting 35 [Homo sapiens]                                     |
| gi 89026254 | r                         | 1      | 2      | 4.40%   | 363      | 41504  |   |        |      |   | 6.2 PREDICTED: similar to vacuolar protein sorting 35 [Homo sapiens]               |
|             | HsFLAG-p53-DNA-D          | 2.9998 | 0.3548 | 1856.39 | 1855.233 | 5358.6 | 1 | 512.9  | 56.7 | 2 | R.FTLPLVFAAYQLAFR.Y                                                                |
| gi 41281612 | r                         | 1      | 2      | 2.00%   | 812      | 89099  |   |        |      |   | 8.4 hypothetical protein LOC283489 [Homo sapiens]                                  |
| *           | HsSrcap_Ti_203.235        | 3.1751 | 0.2642 | 1908.27 | 1910.18  | 9637.4 | 2 | 508.8  | 50   | 2 | K.SSFFIEPQKPVFPETR.K                                                               |
| gi 4504957  | re                        | 1      | 2      | 2.00%   | 410      | 44961  |   |        |      |   | 5.6 lysosomal-associated membrane protein 2 precursor [Homo sapiens]               |
| gi 7669503  | re                        | 1      | 2      | 2.00%   | 410      | 44956  |   |        |      |   | 5.7 lysosomal-associated membrane protein 2 precursor [Homo sapiens]               |
|             | HsFLAG-ARP6_Ti_101.1274.  | 3.0644 | 0.0943 | 988.28  | 988.175  | 2920.8 | 3 | 833.7  | 92.9 | 2 | R.IPLNDLFR.C                                                                       |
| gi 62955803 | r                         | 2      | 3      | 1.90%   | 1749     | 196041 |   |        |      |   | 6.7 nucleoporin 188kDa [Homo sapiens]                                              |
| *           | HsYL1_Ti_106.1807.        | 3.9435 | 0.2944 | 1541.98 | 1541.704 | 4473.7 | 1 | 690    | 63.3 | 2 | R.VQRPPSAASAAPSSSK.Q                                                               |
| *           | HsYL1_Ti_102.3914.        | 4.1494 | 0.4354 | 2013.4  | 2013.301 | 4633.3 | 1 | 889    | 64.7 | 1 | K.ASPESQEPLIQLVQAFVR.H                                                             |
| gi 4503351  | re                        | 2      | 3      | 1.90%   | 1616     | 183164 |   |        |      |   | 7.8 DNA (cytosine-5-)-methyltransferase 1 [Homo sapiens]                           |
| *           | HsFlag-VPS71_Ti_101.1274. | 4.3209 | 0.3427 | 1598.92 | 1598.883 | 6008.7 | 1 | 1136.8 | 75   | 1 | K.LNLLHEFLQTEIK.N                                                                  |
| *           | HsFlag-VPS71_Ti_101.1274. | 5.0571 | 0.4568 | 2035.06 | 2034.235 | 7458.8 | 1 | 1875   | 70.6 | 2 | K.NLGPINEWWITGFDGGEK.A                                                             |
| gi 28372493 | r                         | 1      | 2      | 1.90%   | 913      | 103982 |   |        |      |   | 7.4 cullin 4B [Homo sapiens]                                                       |
| *           | HsFLAG-ARP6_Ti_101.1274.  | 3.1573 | 0.3511 | 1655.77 | 1656.79  | 5958.8 | 1 | 562.1  | 50   | 2 | K.SSTTVSSFANSKPGSAK.K                                                              |
| gi 42476007 | r                         | 1      | 2      | 1.90%   | 901      | 102903 |   |        |      |   | 7.7 hypothetical protein FLJ34922 [Homo sapiens]                                   |
| *           | HsFLAG-Lin9_Ti_203.235    | 3.2086 | 0.2631 | 1826.25 | 1825.125 | 5553.7 | 7 | 437.8  | 46.9 | 2 | R.TADPAILPNVLICLASR.A                                                              |
| gi 4826960  | re                        | 1      | 2      | 1.90%   | 775      | 87799  |   |        |      |   | 7.2 glutaminyl-tRNA synthetase [Homo sapiens]                                      |
| *           | HsFLAG-FLJ20729_1         | 3.1097 | 0.3727 | 1756.61 | 1758.076 | 3409.9 | 1 | 580    | 67.9 | 2 | K.GFHQVPFAPIVFIER.T                                                                |
| gi 11079228 | r                         | 1      | 2      | 1.90%   | 744      | 82654  |   |        |      |   | 6.8 N-ethylmaleimide-sensitive factor [Homo sapiens]                               |
| gi 89042743 | r                         | 1      | 2      | 4.40%   | 315      | 34944  |   |        |      |   | 7.7 PREDICTED: similar to N-ethylmaleimide sensitive fusion protein [Homo sapiens] |
|             | HsFLAG-p53-DNA-D          | 5.2058 | 0.3663 | 1571.53 | 1571.987 | 5946.1 | 1 | 1564.9 | 80.8 | 2 | R.FSNLVLQALLVLLK.K                                                                 |
| gi 4504327  | re                        | 1      | 2      | 1.90%   | 474      | 51294  |   |        |      |   | 9.4 hydroxyacyl dehydrogenase, subunit B [Homo sapiens]                            |
| *           | HsFLAG-ARP6_Ti_101.1274.  | 3.0518 | 0.2616 | 953.14  | 952.145  | 6411.5 | 1 | 819    | 81.2 | 2 | R.AALTGLLHR.T                                                                      |
| gi 16753233 | r                         | 2      | 2      | 1.80%   | 2541     | 269665 |   |        |      |   | 6 talin 1 [Homo sapiens]                                                           |
| *           | HsFLAG-TCF3_Ti_101.1274.  | 3.3838 | 0.3299 | 2094.66 | 2092.403 | 9221.9 | 1 | 959.3  | 47.5 | 1 | R.GVGAAATAVTQALNELLQHVK.A                                                          |
| *           | HsFLAG-TCF3_Ti_101.1274.  | 2.8597 | 0.295  | 2470.15 | 2470.78  | 8829.7 | 2 | 332.3  | 31.2 | 1 | R.GVAALTSDDPAVQAIVLDTASDVLDK.A                                                     |
| gi 18497286 | r                         | 1      | 2      | 1.80%   | 1008     | 114776 |   |        |      |   | 7.7 DEAH (Asp-Glu-Ala-His) box polypeptide 36 [Homo sapiens]                       |
| *           | HsFLAG-ARP6_Ti_101.1274.  | 3.7297 | 0.3158 | 2094.15 | 2095.181 | 7218   | 2 | 925.9  | 55.9 | 2 | R.DSEYLLQENEPDGTLDQK.L                                                             |
| gi 14043022 | r                         | 1      | 2      | 1.80%   | 900      | 101116 |   |        |      |   | 6.2 methionine-tRNA synthetase [Homo sapiens]                                      |
| *           | HsFLAG-ARP6_Ti_101.1274.  | 2.5543 | 0.2895 | 1804.52 | 1805     | 3824.1 | 1 | 282.5  | 53.3 | 2 | R.TLPGSDWTPNAQFTR.S                                                                |
| gi 67782358 | r                         | 1      | 2      | 1.80%   | 764      | 85533  |   |        |      |   | 7.1 complement factor B preproprotein [Homo sapiens]                               |
| *           | HsSrcap_Ti_206.332        | 3.729  | 0.2563 | 1771.45 | 1771.115 | 6534.1 | 1 | 847.6  | 61.5 | 2 | R.DFHINLFQVLPWLK.E                                                                 |
| gi 11345460 | r                         | 1      | 3      | 1.80%   | 669      | 74266  |   |        |      |   | 8.5 hypothetical protein LOC60558 [Homo sapiens]                                   |
| *           | HsFLAG-Lin9_Ti_203.235    | 3.8091 | 0.3    | 1324.06 | 1324.482 | 7469.4 | 1 | 1118.8 | 77.3 | 3 | R.NFSIVAHVDHGK.S                                                                   |
| gi 67551265 | r                         | 2      | 3      | 1.70%   | 2266     | 252496 |   |        |      |   | 6.6 transcription factor ELYS [Homo sapiens]                                       |
| *           | HsYL1_Ti_103.2080.        | 3.2838 | 0.2319 | 1552.22 | 1549.851 | 5652.9 | 3 | 831.4  | 61.5 | 1 | R.ASELHLLLETPLVVK.K                                                                |
|             | HsYL1_Ti_102.2919.        | 2.93   | 0.257  | 2605.99 | 2606.935 | 4901.2 | 1 | 306.3  | 34.8 | 2 | K.AILLPDLSEPNNEPLFSPASEVPR.K                                                       |

|                      |        |        |         |          |         |                                                                              |        |      |   |                              |
|----------------------|--------|--------|---------|----------|---------|------------------------------------------------------------------------------|--------|------|---|------------------------------|
| gi 11496982 r        | 2      | 3      | 1.70%   | 2214     | 247704  | 7 supervillin isoform 2 [Homo sapiens]                                       |        |      |   |                              |
| gi 4507323 re        | 2      | 3      | 2.10%   | 1788     | 200820  | 6.9 supervillin isoform 1 [Homo sapiens]                                     |        |      |   |                              |
| HsFLAG-Lin9_Ti_20'   | 4.6328 | 0.3984 | 1992.17 | 1992.193 | 5336.1  | 1                                                                            | 1274   | 70.6 | 1 | R.YQTQPVTLGEVEQVQSGK.L       |
| HsFLAG-Lin9_Ti_20'   | 5.8107 | 0.4463 | 1842.6  | 1843.14  | 8199.6  | 1                                                                            | 2059.2 | 69.4 | 2 | K.KGLASPTAITPVASAIKCGK.T     |
| gi 44890068 r        | 2      | 2      | 1.70%   | 1548     | 172787  | 6.8 zinc finger protein 262 [Homo sapiens]                                   |        |      |   |                              |
| * HsFLAG-Lin9_Ti_20' | 3.7465 | 0.3041 | 1517.44 | 1516.778 | 8137.3  | 1                                                                            | 798.8  | 57.7 | 1 | K.KPIVTINTNSISTK.C           |
| * HsFLAG-Lin9_Ti_20' | 4.2075 | 0.3509 | 1285.21 | 1285.448 | 9001.1  | 1                                                                            | 1627   | 81.8 | 1 | R.LAAQSQHVGFAR.S             |
| gi 56243590 r        | 2      | 3      | 1.70%   | 1336     | 145891  | 9.2 WD repeat domain 33 isoform 1 [Homo sapiens]                             |        |      |   |                              |
| * HsARP6-FLAG_Ti_1'  | 3.3566 | 0.173  | 1472.02 | 1472.687 | 9137.2  | 3                                                                            | 890.9  | 62.5 | 2 | K.LNLNGNWLLTASR.D            |
| * HsFLAG-p53-DNA-D   | 3.1586 | 0.1541 | 1276.44 | 1276.478 | 6180.8  | 1                                                                            | 961.2  | 83.3 | 1 | R.NLKEELQVFR.G               |
| gi 4758084 re        | 1      | 2      | 1.70%   | 1321     | 142973  | 5.3 chondroitin sulfate proteoglycan 3 (neurocan) [Homo sapiens]             |        |      |   |                              |
| * HsFLAG-p53-DNA-D   | 2.9292 | 0.086  | 2234.18 | 2236.586 | 7962.9  | 2                                                                            | 577.5  | 40.5 | 2 | K.KGTVLCGPPPAVENASLIGARK.A   |
| gi 22748937 r        | 1      | 2      | 1.70%   | 1204     | 136311  | 5.8 exportin 5 [Homo sapiens]                                                |        |      |   |                              |
| * HsFLAG-TCF3_Ti_1'  | 3.5591 | 0.3358 | 2152.12 | 2152.539 | 4556.5  | 1                                                                            | 379.3  | 47.4 | 2 | K.SAILGLPQPLELNDSPVFK.T      |
| gi 41281518 r        | 2      | 4      | 1.70%   | 1159     | 134329  | 7.1 hypothetical protein LOC9897 [Homo sapiens]                              |        |      |   |                              |
| * HsFlag-VPS71_Ti_1' | 3.7534 | 0.2866 | 2229.18 | 2230.609 | 10562.8 | 1                                                                            | 1266.8 | 35.5 | 1 | K.IPEIPADVVGALLFLEDYVR.Y     |
| * HsFlag-VPS71_Ti_1' | 4.9696 | 0.4052 | 2231.6  | 2230.609 | 4451.7  | 1                                                                            | 1409.7 | 71.1 | 3 | K.IPEIPADVVGALLFLEDYVR.Y     |
| gi 30795220 r        | 1      | 2      | 1.70%   | 848      | 100551  | 8.1 crooked neck-like 1 protein [Homo sapiens]                               |        |      |   |                              |
| * HsFlag-NUFIP_Ti_2' | 3.2128 | 0.2888 | 1674.4  | 1674.938 | 5794.2  | 1                                                                            | 598.8  | 57.7 | 2 | K.ERELELLPPPPQKQ.I           |
| gi 4505917 re        | 1      | 2      | 1.70%   | 860      | 98089   | 8.4 exosome component 10 isoform 2 [Homo sapiens]                            |        |      |   |                              |
| gi 50301240 r        | 1      | 2      | 1.70%   | 885      | 100831  | 8.5 exosome component 10 isoform 1 [Homo sapiens]                            |        |      |   |                              |
| HsFLAG-Lin9_Ti_20'   | 2.9053 | 0.3435 | 1747.79 | 1747.827 | 3212.4  | 1                                                                            | 292.1  | 60.7 | 2 | R.SFPGFQAFQFCETQGDR.L        |
| gi 4503165 re        | 1      | 3      | 1.70%   | 768      | 88930   | 8.5 cullin 3 [Homo sapiens]                                                  |        |      |   |                              |
| * HsFLAG-ARP6_Ti_1'  | 3.0471 | 0.2271 | 1430.22 | 1430.613 | 6781.3  | 1                                                                            | 970.6  | 70.8 | 3 | R.ALQSLACGKPTQR.V            |
| gi 34101288 r        | 1      | 5      | 1.70%   | 782      | 88487   | 5.1 cleavage and polyadenylation specific factor 2 [Homo sapiens]            |        |      |   |                              |
| * HsFLAG-FLJ20729_'  | 4.4605 | 0.2529 | 1597.16 | 1597.898 | 8684.9  | 1                                                                            | 1978   | 79.2 | 5 | R.VLELAQLLDQIWR.T            |
| gi 61743954 r        | 5      | 16     | 1.60%   | 5890     | 629114  | 6.1 AHNAK nucleoprotein isoform 1 [Homo sapiens]                             |        |      |   |                              |
| HsSrcap_Ti_204.271   | 3.5963 | 0.4552 | 2178.29 | 2178.456 | 7266.5  | 2                                                                            | 403.1  | 39.5 | 1 | R.ELLLPNWQGSGLTIAQR.D        |
| * HsMRGBP-FLAG_Ti_1' | 3.9207 | 0.3516 | 1639.72 | 1638.778 | 6182.7  | 1                                                                            | 1240.3 | 61.8 | 3 | R.AGAISASGPELQAGHSL.L        |
| HsFlag-VPS71_Ti_1'   | 3.1039 | 0.2558 | 2028.43 | 2029.216 | 8360.6  | 1                                                                            | 848.1  | 52.9 | 5 | K.VDIDAPDQVHGPDPWHLK.M       |
| HsMRGBP-FLAG_Ti_1'   | 3.1504 | 0.2935 | 1268.4  | 1268.409 | 6684.2  | 2                                                                            | 1072.6 | 77.3 | 6 | K.AEGPEVDVNLPK.A             |
| * HsFlag-VPS71_Ti_1' | 4.2548 | 0.3444 | 2582.91 | 2582.865 | 3453.8  | 1                                                                            | 425.3  | 45.8 | 1 | K.SPSLDVTVPEALNLETPEISVGGK.G |
| gi 21626468 r        | 2      | 4      | 1.60%   | 1978     | 220623  | 6.4 zinc finger protein 638 [Homo sapiens]                                   |        |      |   |                              |
| gi 62526045 r        | 2      | 4      | 1.60%   | 1978     | 220623  | 6.4 zinc finger protein 638 [Homo sapiens]                                   |        |      |   |                              |
| HsFLAG-FLJ20309_'    | 4.0465 | 0.2626 | 1577.7  | 1577.775 | 4916.2  | 1                                                                            | 607.9  | 60   | 3 | K.TSSGTPKPSVKPTSATK.S        |
| HsFLAG-ARP6_Ti_1'    | 2.7597 | 0.3044 | 1884.31 | 1884.071 | 4380.8  | 1                                                                            | 673.7  | 60   | 1 | K.AGFFCICSLFYSGEK.A          |
| gi 18375673 r        | 1      | 2      | 1.60%   | 1118     | 123036  | 6.7 regulator of nonsense transcripts 1 [Homo sapiens]                       |        |      |   |                              |
| * HsFLAG-ARP6_Ti_1'  | 4.3971 | 0.3096 | 1862.67 | 1863.211 | 6818.7  | 1                                                                            | 767.6  | 52.9 | 2 | K.TVLQRPLSLIQPPGTGK.T        |
| gi 10835055 r        | 1      | 2      | 1.60%   | 795      | 92707   | 5.6 cell division cycle 2-like 1 (PITSLRE proteins) isoform 1 [Homo sapiens] |        |      |   |                              |
| gi 16357498 r        | 1      | 2      | 1.70%   | 777      | 90661   | 5.5 cell division cycle 2-like 2 isoform 1 [Homo sapiens]                    |        |      |   |                              |
| gi 16357488 r        | 1      | 2      | 3.30%   | 397      | 45229   | 9.2 cell division cycle 2-like 2 isoform 2 [Homo sapiens]                    |        |      |   |                              |
| gi 16357486 r        | 1      | 2      | 1.70%   | 780      | 91063   | 5.4 cell division cycle 2-like 2 isoform 5 [Homo sapiens]                    |        |      |   |                              |
| gi 16357484 r        | 1      | 2      | 1.70%   | 767      | 89688   | 5.4 cell division cycle 2-like 2 isoform 4 [Homo sapiens]                    |        |      |   |                              |

|                      |   |        |        |         |          |        |                                                                          |
|----------------------|---|--------|--------|---------|----------|--------|--------------------------------------------------------------------------|
| gj 16357482 r        | 1 | 2      | 1.70%  | 776     | 90698    | 5.4    | cell division cycle 2-like 2 isoform 3 [Homo sapiens]                    |
| gj 16357480 r        | 1 | 2      | 3.30%  | 397     | 45229    | 9.2    | cell division cycle 2-like 2 isoform 2 [Homo sapiens]                    |
| gj 16332372 r        | 1 | 2      | 1.70%  | 771     | 90047    | 5.4    | cell division cycle 2-like 1 (PITSLRE proteins) isoform 9 [Homo sapiens] |
| gj 16332370 r        | 1 | 2      | 1.70%  | 780     | 91009    | 5.4    | cell division cycle 2-like 1 (PITSLRE proteins) isoform 8 [Homo sapiens] |
| gj 16332366 r        | 1 | 2      | 2.30%  | 565     | 63937    | 4.7    | cell division cycle 2-like 1 (PITSLRE proteins) isoform 6 [Homo sapiens] |
| gj 16332364 r        | 1 | 2      | 1.70%  | 748     | 87138    | 5.4    | cell division cycle 2-like 1 (PITSLRE proteins) isoform 5 [Homo sapiens] |
| gj 16332362 r        | 1 | 2      | 1.80%  | 737     | 85906    | 5.3    | cell division cycle 2-like 1 (PITSLRE proteins) isoform 4 [Homo sapiens] |
| gj 16332360 r        | 1 | 2      | 2.50%  | 526     | 59273    | 4.6    | cell division cycle 2-like 1 (PITSLRE proteins) isoform 3 [Homo sapiens] |
| gj 16332358 r        | 1 | 2      | 1.70%  | 782     | 91332    | 5.5    | cell division cycle 2-like 1 (PITSLRE proteins) isoform 2 [Homo sapiens] |
| HsFLAG-Lin9_Ti_20    |   | 3.88   | 0.3287 | 1367.38 | 1367.632 | 6156.7 | 1 1246.8 75 2 K.TSNLLLSHAGILK.V                                          |
| gj 10947135 r        | 1 | 2      | 1.60%  | 807     | 91680    | 7.7    | ATP-binding cassette, sub-family F, member 1 isoform b [Homo sapiens]    |
| gj 69354671 r        | 1 | 2      | 1.50%  | 845     | 95926    | 6.8    | ATP-binding cassette, sub-family F, member 1 isoform a [Homo sapiens]    |
| HsFLAG-p53-DNA-D     |   | 4.1117 | 0.3403 | 1614.65 | 1614.801 | 9835.4 | 1 1472.2 70.8 2 K.IGFFNQYAEQLR.M                                         |
| SHUFFLED_ç           | 1 | 5      | 1.60%  | 492     | 53132    | 9.4    | FALSE POSITIVE                                                           |
| SHUFFLED_ç           | 1 | 5      | 1.60%  | 492     | 53132    | 9.4    | FALSE POSITIVE                                                           |
| HsFLAG-KIAA0515_     |   | 2.1559 | 0.1047 | 898.55  | 898.137  | 3680.8 | 9 439.6 71.4 5 K.PLTAVRLK.A                                              |
| gj 21264565 r        | 2 | 2      | 1.50%  | 2285    | 242042   | 6.7    | AT rich interactive domain 1A (SWI- like) isoform a [Homo sapiens]       |
| gj 21264575 r        | 2 | 2      | 1.70%  | 2068    | 218333   | 6.5    | AT rich interactive domain 1A (SWI- like) isoform b [Homo sapiens]       |
| HsFLAG-Lin9_Ti_20    |   | 4.3844 | 0.2367 | 2516.76 | 2516.637 | 7624.6 | 1 1077 34.4 1 K.HVTTAEGTPGTTDQEGPPDPPEK.R                                |
| HsFLAG-p53-DNA-D     |   | 2.4894 | 0.2871 | 1060.56 | 1061.356 | 4175.7 | 2 452.4 66.7 1 K.HPGLLLILGK.L                                            |
| gj 89047143 r        | 2 | 2      | 1.50%  | 1848    | 213671   | 7.2    | PREDICTED: myosin VB isoform 1 [Homo sapiens]                            |
| gj 89047438 r        | 2 | 2      | 1.50%  | 1848    | 213641   | 7.2    | PREDICTED: similar to Myosin-5B (Myosin Vb) isoform 5 [Homo sapiens]     |
| HsFLAG-ARP6_Ti_1     |   | 2.7468 | 0.1547 | 1791.91 | 1792.132 | 9797.7 | 2 638.6 43.8 1 K.IIASILHLGSVAIQAE.R.D                                    |
| HsFLAG-ARP6_Ti_1     |   | 3.1134 | 0.2114 | 1453.28 | 1451.622 | 8922.1 | 1 1314.6 80 1 R.YNISQLEEWLR.G                                            |
| gj 33620716 r        | 2 | 10     | 1.50%  | 1758    | 197286   | 9.6    | retinoblastoma-binding protein 6 isoform 2 [Homo sapiens]                |
| gj 33620769 r        | 2 | 10     | 1.50%  | 1792    | 201563   | 9.6    | retinoblastoma-binding protein 6 isoform 1 [Homo sapiens]                |
| HsFLAG-Lin9_Ti_20    |   | 2.6361 | 0.0889 | 1616.82 | 1617.854 | 8459.5 | 1 832.7 65.4 1 K.KPLGPPPSYTCFR.C                                         |
| HsFLAG-p53-DNA-D     |   | 3.7041 | 0.2846 | 1307.93 | 1308.52  | 5111   | 1 783 75 9 K.ILPAAALASEHSK.G                                             |
| gj 39652628 r        | 1 | 2      | 1.50%  | 1118    | 121888   | 8.9    | hypothetical protein LOC23196 [Homo sapiens]                             |
| * HsYL1_Ti_101.1190. |   | 3.443  | 0.3404 | 1568.22 | 1567.607 | 4304   | 1 595.1 56.2 2 K.AEGSSTASSGSQLAEGK.G                                     |
| gj 89040264 r        | 1 | 2      | 1.50%  | 869     | 96620    | 7.9    | PREDICTED: zinc finger protein 629 [Homo sapiens]                        |
| gj 89040817 r        | 1 | 2      | 1.50%  | 869     | 96620    | 7.9    | PREDICTED: similar to zinc finger protein 629 [Homo sapiens]             |
| HsFLAG-ARP6_Ti_1     |   | 3.644  | 0.1982 | 1489.41 | 1489.631 | 9214.7 | 1 1104.7 66.7 2 K.SFSVSSNLINHQR.I                                        |
| gj 10834990 r        | 1 | 2      | 1.50%  | 848     | 93361    | 4.9    | neural cell adhesion molecule 1 isoform 1 [Homo sapiens]                 |
| gj 41281937 r        | 1 | 2      | 1.50%  | 858     | 94601    | 4.9    | neural cell adhesion molecule 1 isoform 2 [Homo sapiens]                 |
| HsFLAG-ARP6_Ti_1     |   | 3.4493 | 0.177  | 1565.51 | 1564.513 | 5233   | 1 880.6 70.8 2 K.DGEQIEQEEDDEK.Y                                         |
| gj 24308177 r        | 1 | 2      | 1.50%  | 819     | 91969    | 4.7    | hypothetical protein LOC55677 [Homo sapiens]                             |
| * HsARP6-FLAG_Ti_1   |   | 3.5512 | 0.1828 | 1336.14 | 1335.734 | 3353.6 | 4 533.5 77.3 2 K.LTLLPAVVMHLK.K                                          |
| gj 21040314 r        | 2 | 3      | 1.40%  | 2303    | 250386   | 5.6    | SON DNA-binding protein isoform B [Homo sapiens]                         |
| gj 38146099 r        | 2 | 3      | 1.40%  | 2386    | 259619   | 5.7    | SON DNA-binding protein isoform G [Homo sapiens]                         |
| gj 21040326 r        | 2 | 3      | 1.40%  | 2426    | 263827   | 5.6    | SON DNA-binding protein isoform F [Homo sapiens]                         |
| gj 21040322 r        | 2 | 3      | 1.40%  | 2325    | 252251   | 5.4    | SON DNA-binding protein isoform C [Homo sapiens]                         |
| gj 21040320 r        | 2 | 3      | 1.50%  | 2140    | 232307   | 6      | SON DNA-binding protein isoform A [Homo sapiens]                         |

|                     |        |        |         |          |        |                                                                                                                 |
|---------------------|--------|--------|---------|----------|--------|-----------------------------------------------------------------------------------------------------------------|
| gij 21040318 r      | 2      | 3      | 1.60%   | 2108     | 228179 | 5.4 SON DNA-binding protein isoform E [Homo sapiens]                                                            |
| HsFLAG-ARP6_Ti_1    | 2.9701 | 0.152  | 1857.36 | 1858.229 | 4041.2 | 8 299.2 44.1 1 K.ILDSFAAAPVPTTTLVLK.S                                                                           |
| HsFLAG-ARP6_Ti_1    | 3.6099 | 0.1713 | 1680.54 | 1679.87  | 5443.5 | 1 997.8 71.4 2 K.DIHLDLPSNNNLVSK.D                                                                              |
| gij 26051235 r      | 1      | 2      | 1.40%   | 1156     | 128979 | 5.1 nucleoporin 133kDa [Homo sapiens]                                                                           |
| * HsFLAG-ARP6_Ti_1  | 4.2135 | 0.4261 | 1909.53 | 1910.221 | 6996.5 | 1 1419.1 70 2 R.FLLHQETLPEQLLAEK.Q                                                                              |
| gij 7662310 re      | 1      | 2      | 1.40%   | 1054     | 119888 | 8.8 FERM, RhoGEF and pleckstrin domain protein 2 [Homo sapiens]                                                 |
| * HsFLAG-ARP6_Ti_1  | 3.2771 | 0.2979 | 1614.34 | 1613.718 | 6402.6 | 2 891.5 60.7 2 K.DSSSSLTDPQVSYVK.S                                                                              |
| gij 31652264 r      | 1      | 2      | 1.40%   | 980      | 110666 | 9.1 cutaneous T-cell lymphoma tumor antigen se70-2 [Homo sapiens]                                               |
| * HsFlag-VPS71_Ti_1 | 3.3279 | 0.3377 | 1410.8  | 1410.533 | 6985.6 | 1 610.8 57.7 2 K.TRAEAEAAVHGAR.F                                                                                |
| gij 55770844 r      | 1      | 2      | 1.40%   | 906      | 100071 | 6.3 catenin, alpha 1 [Homo sapiens]                                                                             |
| gij 55770846 r      | 1      | 2      | 1.40%   | 905      | 100447 | 6 catenin, alpha 2 [Homo sapiens]                                                                               |
| HsFLAG-ARP6_Ti_1    | 3.1269 | 0.1791 | 1620.09 | 1620.821 | 5620.2 | 1 1060.4 79.2 2 R.IALYCHQLNICKS.V                                                                               |
| gij 55769587 r      | 1      | 4      | 1.40%   | 857      | 97668  | 7.6 hypothetical protein LOC8602 [Homo sapiens]                                                                 |
| * HsFLAG-ARP6_Ti_1  | 3.0579 | 0.3068 | 1300.62 | 1300.46  | 6173.3 | 2 585.9 59.1 4 K.ASQGSTLVHPFR.A                                                                                 |
| gij 7662142 re      | 1      | 2      | 1.30%   | 1584     | 175322 | 7.1 centrosomal protein 170kDa [Homo sapiens]                                                                   |
| gij 88980705 r      | 1      | 2      | 2.80%   | 719      | 78666  | 9.2 PREDICTED: similar to KARP-1-binding protein [Homo sapiens]                                                 |
| HsFLAG-FLJ20729_    | 3.5715 | 0.3437 | 1950.43 | 1951.098 | 8905.6 | 1 647.4 42.1 2 K.ASVASEVSTTSSTSKPPTGR.R                                                                         |
| gij 15559211 r      | 1      | 2      | 1.30%   | 1097     | 121888 | 6.7 RE1-silencing transcription factor [Homo sapiens]                                                           |
| * HsFLAG-ARP6_Ti_1  | 4.0973 | 0.2757 | 1543.05 | 1543.764 | 6358.7 | 1 1374.3 80.8 2 K.KPSNNVSVIQVTTR.T                                                                              |
| gij 13470086 r      | 1      | 3      | 1.30%   | 980      | 110042 | 6.2 retinoic acid induced 14 [Homo sapiens]                                                                     |
| * HsFLAG-Lin9_Ti_20 | 5.3136 | 0.2628 | 1597.05 | 1597.852 | 10612  | 1 2824.3 87.5 3 R.IQLQEILQDLQK.R                                                                                |
| gij 42542379 r      | 1      | 9      | 1.30%   | 904      | 102335 | 11.8 serine/arginine repetitive matrix 1 [Homo sapiens]                                                         |
| * HsFLAG-Lin9_Ti_20 | 4.012  | 0.2572 | 1439.62 | 1440.769 | 8241.3 | 1 1541 81.8 9 K.VNLEVIKPWITK.R                                                                                  |
| gij 4504951 re      | 1      | 2      | 1.20%   | 1786     | 198065 | 5 laminin, beta 1 precursor [Homo sapiens]                                                                      |
| * HsFLAG-TCF3_Ti_1  | 4.7361 | 0.4183 | 2393.03 | 2393.61  | 9409.4 | 1 1141.3 47.6 2 R.NFLTQDSADLDSIEAVANEVLK.M                                                                      |
| gij 31982941 r      | 1      | 2      | 1.20%   | 1564     | 184854 | 9.5 KIAA0853 [Homo sapiens]                                                                                     |
| * HsFLAG-FLJ20729_  | 4.8634 | 0.3999 | 2028.4  | 2029.374 | 8010.6 | 1 2071.9 70.6 2 K.MPDPLDVIDVDWSGLMPK.H                                                                          |
| gij 31543299 r      | 1      | 2      | 1.20%   | 1327     | 146269 | 7.8 neuropathy target esterase [Homo sapiens]                                                                   |
| * HsFLAG-ARP6_Ti_1  | 3.5518 | 0.3406 | 1578.48 | 1578.812 | 8054.3 | 1 1013.6 63.3 2 R.AQPSVLSAAHTVAAR.M                                                                             |
| gij 41281483 r      | 1      | 4      | 1.20%   | 1282     | 145821 | 6.4 BMS1-like, ribosome assembly protein [Homo sapiens]                                                         |
| * HsFLAG-p53-DNA-D  | 4.9204 | 0.3076 | 1609.91 | 1609.907 | 8108.2 | 1 1433.2 67.9 4 K.ILALLDALSTVHSQK.M                                                                             |
| gij 89056848 r      | 1      | 3      | 1.20%   | 1303     | 140256 | 6.3 PREDICTED: hypothetical protein LOC23211 isoform 1 [Homo sapiens]                                           |
| gij 89057535 r      | 1      | 3      | 1.20%   | 1303     | 140256 | 6.3 PREDICTED: similar to Zinc finger CCCH-type domain containing protein 6 isoform 4 [Homo sapiens]            |
| HsSrcap_Ti_202.446  | 3.9211 | 0.356  | 1846.13 | 1846.22  | 5839.7 | 1 734.8 56.7 3 R.TVLWNPEDLIPLPIK.Q                                                                              |
| gij 18375637 r      | 1      | 3      | 1.20%   | 1210     | 132383 | 5.5 HLA-B associated transcript 8 isoform a [Homo sapiens]                                                      |
| gij 18426879 r      | 1      | 3      | 1.20%   | 1176     | 129032 | 5.5 HLA-B associated transcript 8 isoform b [Homo sapiens]                                                      |
| HsSrcap_Ti_205.235  | 3.9156 | 0.3518 | 1708.72 | 1708.967 | 5805   | 1 811.8 61.5 3 R.FINHLCDPNIIIVR.V                                                                               |
| gij 21702733 r      | 1      | 2      | 1.10%   | 1962     | 210270 | 6.7 trinucleotide repeat containing 6A isoform 2 [Homo sapiens]                                                 |
| gij 21702742 r      | 1      | 2      | 1.20%   | 1709     | 182053 | 6.6 trinucleotide repeat containing 6A isoform 1 [Homo sapiens]                                                 |
| Hs293Flag-les2_Ti_1 | 4.0991 | 0.3719 | 2315.53 | 2314.522 | 6526.4 | 1 770.2 52.5 2 R.RGWGTPAQNTGTNLPSVEWNL.L                                                                        |
| gij 51467601 r      | 1      | 2      | 1.10%   | 1337     | 145904 | 5.5 PREDICTED: hypothetical protein LOC23307 [Homo sapiens]                                                     |
| gij 89030541 r      | 1      | 2      | 1.10%   | 1342     | 146529 | 5.6 PREDICTED: similar to Golgi autoantigen, golgin subfamily A member 6 (Golgin linked to PML) (Golgin-like pr |
| HsFlag-VPS71_Ti_1   | 4.8767 | 0.385  | 1705.92 | 1704.797 | 7109.2 | 1 1134.6 67.9 2 K.RNNSLQTATENTQAR.V                                                                             |

|                      |          |          |              |             |               |            |                                                                                           |
|----------------------|----------|----------|--------------|-------------|---------------|------------|-------------------------------------------------------------------------------------------|
| gi 19923597 r        | 1        | 2        | 1.10%        | 1048        | 110324        | 9.8        | mSin3A-associated protein 130 [Homo sapiens]                                              |
| * HsSrcap_Ti_205.154 | 3.0235   | 0.2831   | 1363.79      | 1363.56     | 3267          | 1          | 350.6 68.2 2 K.VVPQQITHTSPR.I                                                             |
| gi 19923790 r        | 1        | 4        | 1.00%        | 1393        | 155984        | 5.6        | rab3 GTPase-activating protein, non-catalytic subunit [Homo sapiens]                      |
| * HsFlag-FLJ90652_2  | 4.1532   | 0.4037   | 1397.14      | 1397.574    | 9655.3        | 1          | 1749.9 76.9 4 K.VVSAAVQAQHSATK.V                                                          |
| <b>SHUFFLED_</b>     | <b>1</b> | <b>2</b> | <b>1.00%</b> | <b>1147</b> | <b>124824</b> | <b>8.8</b> | <b>FALSE POSITIVE</b>                                                                     |
| * HsScrap_Ti_106.230 | 3.0242   | 0.1328   | 1167.57      | 1167.351    | 5709.4        | 2          | 1145.9 68.2 2 R.DPLATVAPGAVR.A                                                            |
| gi 33695086 r        | 1        | 2        | 1.00%        | 1086        | 113923        | 8          | nicotinamide nucleotide transhydrogenase [Homo sapiens]                                   |
| * HsFLAG-ARP6_Ti_1   | 3.3816   | 0.314    | 1155.41      | 1155.345    | 7264.2        | 1          | 1397 85 2 K.AVVLAANHFGR.F                                                                 |
| gi 32967601 r        | 2        | 2        | 0.90%        | 4377        | 480416        | 6.5        | ankyrin 3 isoform 1 [Homo sapiens]                                                        |
| * HsFLAG-Lin9_Ti_20  | 3.1592   | 0.2481   | 1676.85      | 1675.969    | 9353.6        | 3          | 885 53.1 1 K.VALLLLDQGASPHAAAK.N                                                          |
| HsFLAG-p53-DNA-D     | 4.2811   | 0.2189   | 2294.42      | 2294.61     | 9094.4        | 1          | 752.9 42.5 1 R.IDIVTLLEGPIFDYGNISGTR.S                                                    |
| gi 57634534 r        | 1        | 2        | 0.90%        | 2012        | 227918        | 6.2        | nucleoporin 205kDa [Homo sapiens]                                                         |
| * HsFLAG-ARP6_Ti_1   | 2.8582   | 0.2044   | 2164.71      | 2164.422    | 8621.8        | 8          | 473.9 41.2 2 R.TSQDFLFSQLQYLPFSNK.E                                                       |
| gi 32483416 r        | 1        | 2        | 0.90%        | 1020        | 111838        | 6.1        | neurofilament, heavy polypeptide 200kDa [Homo sapiens]                                    |
| HsH2AZ-FLAG_293_     | 3.083    | 0.0921   | 1134.32      | 1134.241    | 5037.5        | 1          | 845.6 81.2 2 R.KLLEGEECR.I                                                                |
| gi 89028962 r        | 1        | 2        | 0.80%        | 2951        | 322607        | 5.8        | PREDICTED: similar to epiplakin 1 [Homo sapiens]                                          |
| * HsFLAG-FLJ20729_   | 4.9785   | 0.2388   | 2514.57      | 2514.839    | 9228.9        | 1          | 2076.7 38.5 2 R.AGTLTVEELGATLTSLLAQAQAQAR.A                                               |
| gi 4506355 re        | 1        | 2        | 0.80%        | 1482        | 163835        | 6.4        | pregnancy-zone protein [Homo sapiens]                                                     |
| * HsFLAG-TCF3_Ti_1   | 3.7058   | 0.3403   | 1493.95      | 1492.684    | 5756.7        | 1          | 867.3 72.7 2 K.DLFHCVSFTLPR.I                                                             |
| gi 24430139 r        | 1        | 2        | 0.80%        | 1393        | 152754        | 6.4        | RNA polymerase II associated protein 1 [Homo sapiens]                                     |
| * HsFLAG-ARP6_Ti_1   | 3.1219   | 0.226    | 1167.24      | 1167.354    | 6280.7        | 1          | 1039.7 80 2 R.ASLASQALHR.G                                                                |
| gi 71044479 r        | 1        | 2        | 0.70%        | 2240        | 243840        | 7.9        | death inducer-obliterator 1 isoform c [Homo sapiens]                                      |
| * HsFlag-VPS71_Ti_1  | 4.1735   | 0.469    | 1656.21      | 1655.935    | 7375.4        | 1          | 1000.1 60.7 2 K.TASPLEHILQTLFGK.K                                                         |
| gi 67190748 r        | 1        | 2        | 0.70%        | 1744        | 192784        | 7.1        | complement component 4A preproprotein [Homo sapiens]                                      |
| * HsSrcap_Ti_202.391 | 3.5796   | 0.2062   | 1368.35      | 1368.572    | 6090.6        | 1          | 1343.1 81.8 2 R.DSSTWLTAFLVK.V                                                            |
| <b>SHUFFLED_</b>     | <b>1</b> | <b>2</b> | <b>0.70%</b> | <b>1036</b> | <b>113738</b> | <b>5.2</b> | <b>FALSE POSITIVE</b>                                                                     |
| * HsFLAG-FLJ20309_   | 2.2344   | 0.0829   | 755.43       | 755.933     | 3133          | 9          | 510.1 83.3 2 K.ELGVPLK.L                                                                  |
| gi 56550039 r        | 1        | 2        | 0.50%        | 3969        | 431768        | 9.1        | myeloid/lymphoid or mixed-lineage leukemia (trithorax homolog, Drosophila) [Homo sapiens] |
| * HsYL1_Ti_101.1778. | 4.1108   | 0.4658   | 1970.68      | 1970.054    | 5364.8        | 1          | 889.4 57.9 2 R.NNVSSVSTTGATDLESSAK.V                                                      |
| <b>SHUFFLED_</b>     | <b>1</b> | <b>2</b> | <b>0.50%</b> | <b>3677</b> | <b>383851</b> | <b>7.3</b> | <b>FALSE POSITIVE</b>                                                                     |
| * HsFLAG-TIP49b_Ti_  | 3.2565   | 0.1432   | 1852.8       | 1853.153    | 5644.9        | 3          | 440.8 46.9 2 R.VGRPSKSMADPRALNPR.S                                                        |
| gi 21361116 r        | 1        | 2        | 0.50%        | 3396        | 372821        | 4.5        | chondroitin sulfate proteoglycan 2 (versican) [Homo sapiens]                              |
| * HsFLAG-ARP6_Ti_1   | 3.5133   | 0.2168   | 1990.61      | 1991.047    | 9334.1        | 1          | 1203.9 56.2 2 R.NGFDQCXYGWLSDASVR.H                                                       |

|           | Proteins | Peptide IDs | Copies |
|-----------|----------|-------------|--------|
| Redundant | 1987     | 9657        | 69314  |
| Nonredund | 1287     | 8985        | 60474  |
