# Supplementary material
Source: PubMed Central journal article supplement (PMC2234165)
Supplement: pnas_0706983105_5.pdf [file pnas_0706983105_5.pdf]

**Supporting Table 2A. List of Proteins Detected in Negative Controls from HeLa and HEK293 Cells.  
pages 2-5**

**Supporting Table 2B. Detailed List of Proteins and Peptides Detected in the Combined Negative Control Dataset.  
pages 6-179**



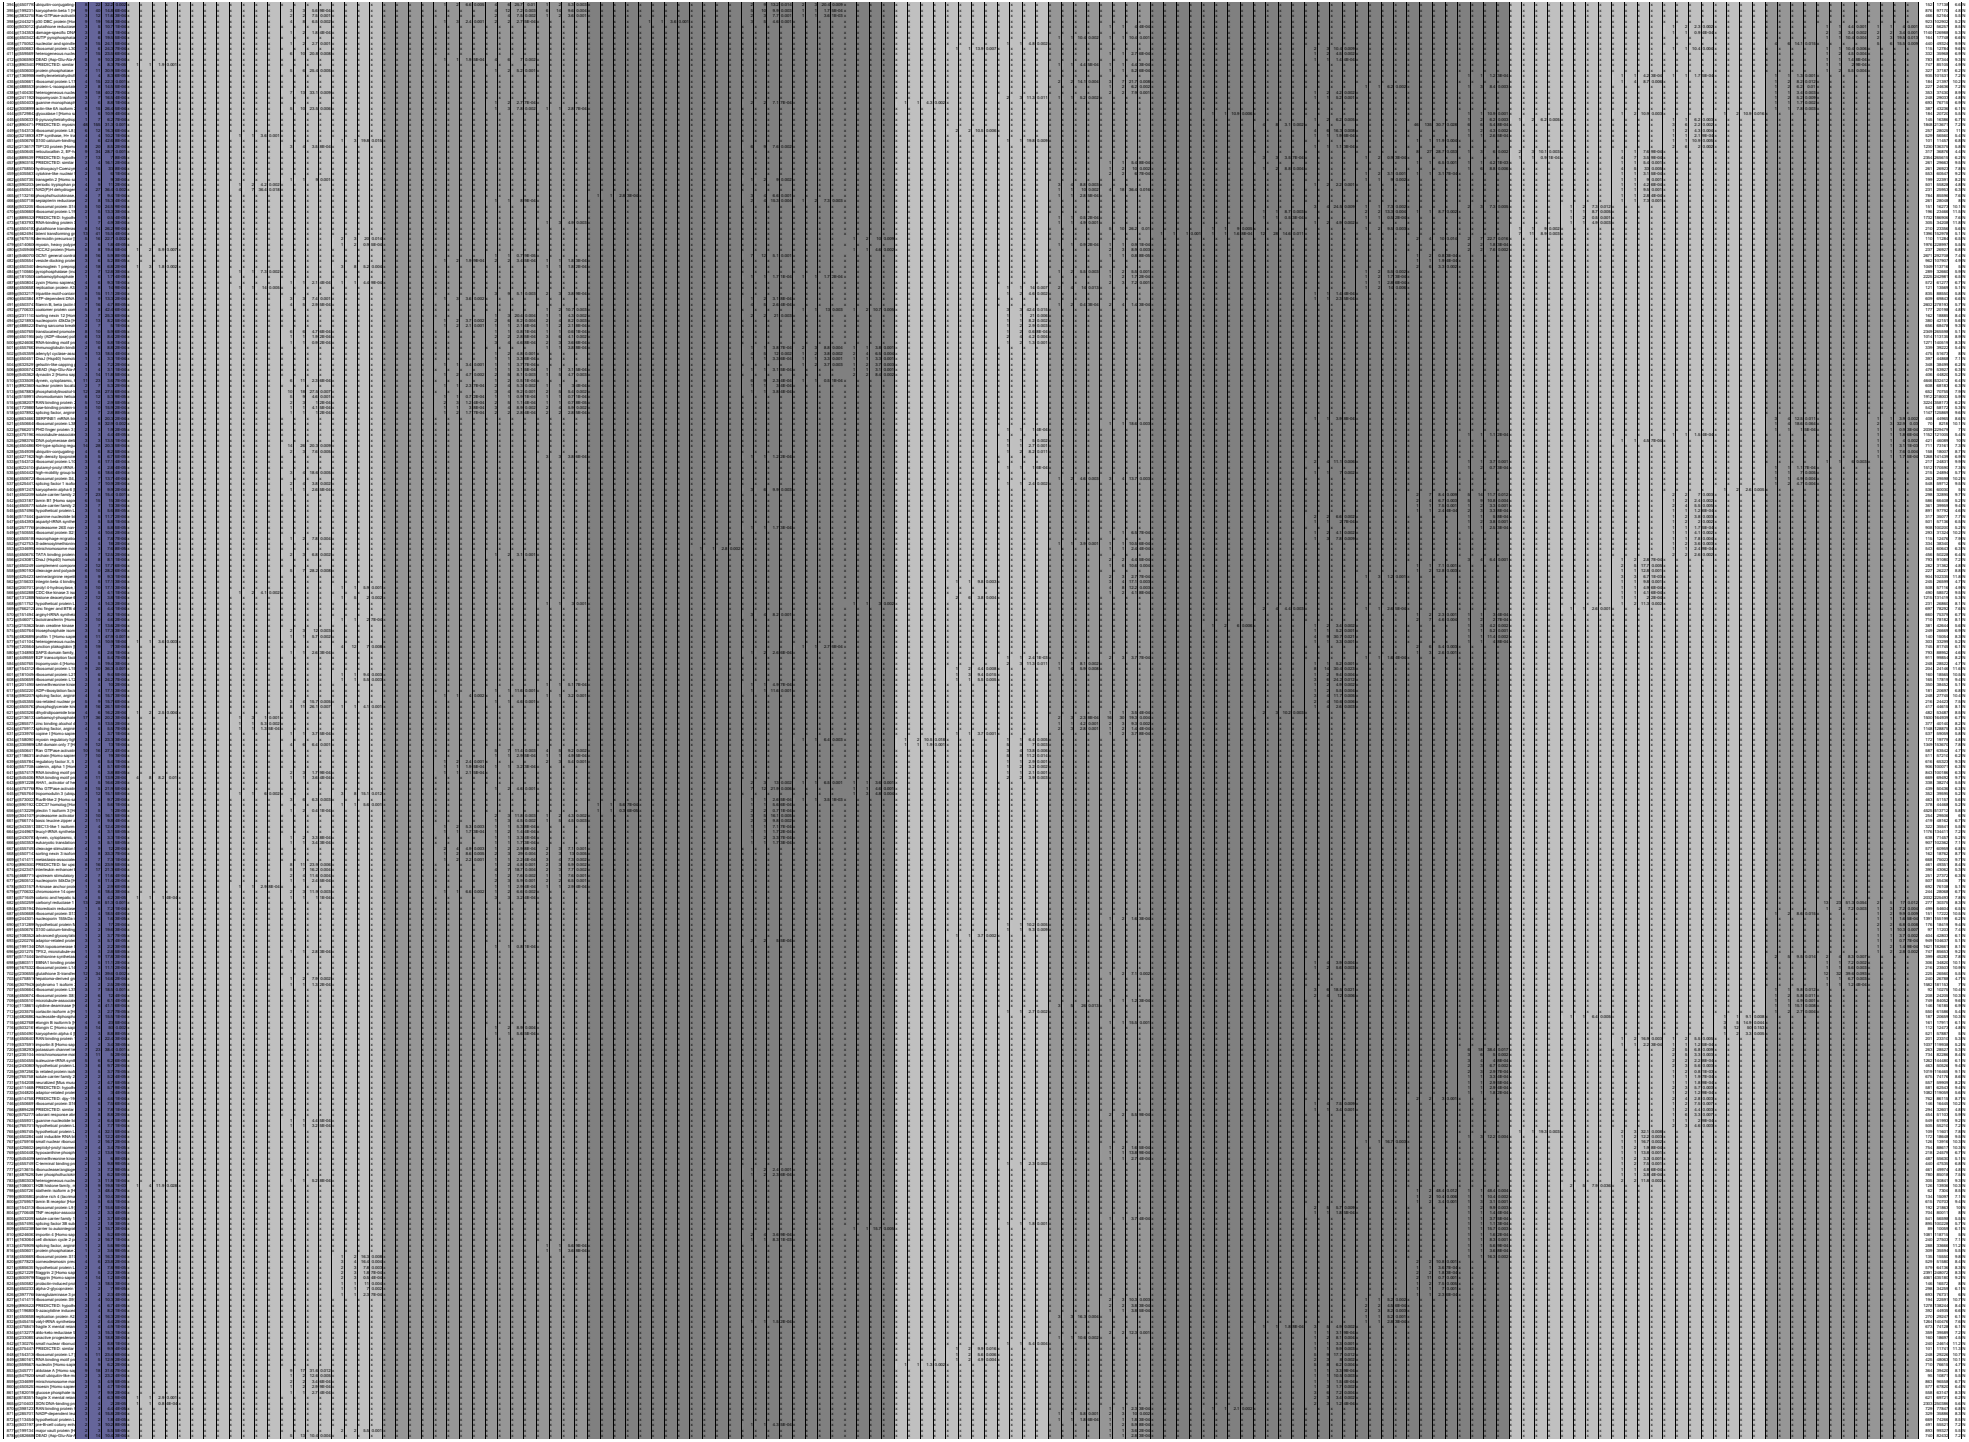





## Supporting Table 2B. Detailed List of Proteins and Peptides Detected in the Combined Negative Control Dataset.

Proteins with peptides passing the selection criteria described in the table below are listed by decreasing sequence coverage (percent of the protein sequence covered by the detected peptides).

| Criteria Set | Parameter                                | Value       |
|--------------|------------------------------------------|-------------|
|              | Minimum +1 XCorr                         | 1.8         |
|              | Minimum +2 XCorr                         | 2.5         |
|              | Minimum +3 XCorr                         | 3.5         |
|              | Minimum DeltCN                           | 0.08        |
|              | Minimum charge state                     | 1           |
|              | Maximum charge state                     | 3           |
|              | Minimum ion proportion                   | 0           |
|              | Maximum Sp rank                          | 10          |
|              | Minimum Sp score                         | -1          |
|              | Modified peptide inclusion               | Include     |
|              | Tryptic status requirement               | Full        |
|              | Multiple, ambiguous IDs allowed          | FALSE       |
|              | Minimum sequence length                  | 7           |
|              | Maximum sequence length                  | 100         |
|              | Sequence completeness required           | 0           |
|              | Purge duplicate peptides by protein      | XCorr       |
|              | Include only loci with unique peptide    | FALSE       |
|              | Remove subset proteins                   | TRUE        |
|              | Exclude protein names matching           | Contaminant |
|              | Exclude protein descriptions matching    | KERATIN     |
|              | Minimum modified peptides per locus      | 0           |
|              | Minimum redundancy for low coverage loci | 2           |
|              | Minimum peptides per locus               | 2           |

| Locus             | Sequence Count           | Spectrum Count | Sequence Coverage | Length  | MolWt    | pI             | Validation Status | Descriptive Name               |               |            |                                      |
|-------------------|--------------------------|----------------|-------------------|---------|----------|----------------|-------------------|--------------------------------|---------------|------------|--------------------------------------|
| Unique            | FileName                 | XCorr          | DeltCN            | M+H+    | CalcM+H+ | TotalIntensity | SpRank            | SpScore                        | IonProportion | Redundancy | Sequence                             |
| gi Flag_peptide   |                          | 3              | 31                | 1       | 8        | 1013           | 4.3 U             | [FLAG peptide]                 |               |            |                                      |
|                   | HsHeLa_Control_Ti_101.00 | 2.6722         | 0.0932            | 1013.73 | 1013.99  | 5017.2         | 5                 | 514.6                          | 71.4          | 5          | -.DYKDDDDK.-                         |
|                   | HsHeLa_Control-MG_Ti_10  | 2.682          | 0.1398            | 1013.82 | 1013.99  | 5124.1         | 5                 | 588.4                          | 71.4          | 24         | -.DYKDDDDK.-                         |
|                   | HsFLAG-Control_HeLa_NE   | 3.0205         | 0.1185            | 1014.29 | 1013.99  | 5542.3         | 8                 | 982.2                          | 92.9          | 2          | -.DYKDDDDK.-                         |
| gi 32455264 ref N |                          | 43             | 144               | 0.744   | 199      | 22110          | 8.1 U             | peroxiredoxin 1 [Homo sapiens] |               |            |                                      |
| gi 4505591 ref NF |                          | 43             | 144               | 0.744   | 199      | 22110          | 8.1 U             | peroxiredoxin 1 [Homo sapiens] |               |            |                                      |
| gi 32455266 ref N |                          | 43             | 144               | 0.744   | 199      | 22110          | 8.1 U             | peroxiredoxin 1 [Homo sapiens] |               |            |                                      |
|                   | HsFLAG-MOCK_300mM_T      | 2.2031         | 0.2368            | 980.6   | 981.142  | 4209.2         | 1                 | 374.8                          | 62.5          | 19         | K.IGHPAPNFK.A                        |
|                   | HsFLAG-MOCK_300mM_T      | 2.0955         | 0.3208            | 1164.37 | 1165.35  | 5596.2         | 4                 | 386.3                          | 55            | 2          | K.ATAVMPDGQFK.D                      |
|                   | HsHeLa_Control-MG_Ti_20  | 5.2246         | 0.4433            | 3095.93 | 3095.53  | 6416.5         | 1                 | 905                            | 45.8          | 3          | K.YVVFYPLDFTFVCPTEIIAFSDR.A          |
|                   | HsHeLa_Control-MG_Ti_20  | 5.0478         | 0.324             | 3097.25 | 3095.53  | 8398.6         | 1                 | 1831.3                         | 37.5          | 1          | K.YVVFYPLDFTFVCPTEIIAFSDR.A          |
|                   | HsHeLa_Control-MG_Ti_20  | 5.0651         | 0.495             | 2753.49 | 2755.04  | 7512.7         | 1                 | 1240.9                         | 52.2          | 2          | K.LNCQVIGASVDSHFCHLAWVNTPK.K         |
|                   | HsGST-MOCK_Ti_105.217    | 3.6616         | 0.2129            | 2755.75 | 2755.04  | 4902.9         | 3                 | 612.5                          | 31.5          | 1          | K.LNCQVIGASVDSHFCHLAWVNTPK.K         |
|                   | Hs293FLP_Ti_306.2691.26  | 4.023          | 0.3898            | 1753.15 | 1752.08  | 2715.2         | 1                 | 541.5                          | 65.6          | 1          | K.KQGGLGPMNIPLVSDPK.R                |
|                   | HsGST-MOCK_Ti_304.273    | 3.9108         | 0.3212            | 1622.89 | 1623.91  | 6549.5         | 1                 | 1467.3                         | 73.3          | 10         | K.QGGLGPMNIPLVSDPK.R                 |
|                   | Hs293FLP-MG_Ti_306.237   | 2.617          | 0.1722            | 1263.45 | 1264.47  | 3157.2         | 6                 | 277.8                          | 65            | 1          | K.RTIAQDYGVLK.A                      |
|                   | Hs293FLP-MG_Ti_204.178   | 3.1781         | 0.1557            | 1264.12 | 1264.47  | 5099.3         | 1                 | 1072.2                         | 85            | 6          | K.RTIAQDYGVLK.A                      |
|                   | Hs293FLP-MG_Ti_306.238   | 3.0703         | 0.1576            | 1264.94 | 1264.47  | 4744.6         | 1                 | 1041.1                         | 80            | 5          | K.RTIAQDYGVLK.A                      |
|                   | Hs293FLP-MG_Ti_202.210   | 2.0427         | 0.1032            | 1107.51 | 1108.28  | 9469.2         | 6                 | 755.6                          | 66.7          | 1          | R.TIAQDYGVLK.A                       |
|                   | HsFLAG-MOCK_300mM_T      | 2.9813         | 0.2931            | 1108.42 | 1108.28  | 2778           | 1                 | 627.2                          | 88.9          | 4          | R.TIAQDYGVLK.A                       |
|                   | Hs293FLP-MG_Ti_202.212   | 2.6848         | 0.2549            | 1108.43 | 1108.28  | 2869.9         | 1                 | 577.4                          | 83.3          | 1          | R.TIAQDYGVLK.A                       |
|                   | HsFLAG-MOCK_300mM_T      | 3.5927         | 0.4618            | 1984.93 | 1984.22  | 6468.7         | 1                 | 1153.3                         | 61.8          | 2          | R.TIAQDYGVLKADEGISFR.G               |
|                   | HsFLAG-MOCK_300mM_T      | 2.8872         | 0.1391            | 894.47  | 894.96   | 4120.3         | 1                 | 877.3                          | 92.9          | 2          | K.ADEGISFR.G                         |
|                   | Hs293FLP_TREX_Ti_102.1   | 3.0279         | 0.27              | 1212.5  | 1212.39  | 5952.5         | 1                 | 1083.6                         | 90            | 8          | R.QITVNDLPVGR.S                      |
|                   | HsHeLa_Control-MG_Ti_20  | 3.0729         | 0.2001            | 1196.33 | 1197.38  | 5817.7         | 3                 | 564.6                          | 72.2          | 2          | R.LVQAFQFTDK.H                       |
|                   | HsFLAG-Control_293_Ti_20 | 3.3774         | 0.2123            | 1196.35 | 1197.38  | 7910.3         | 1                 | 723                            | 72.2          | 4          | R.LVQAFQFTDK.H                       |
|                   | Hs293FLP-MG_Ti_202.237   | 2.6414         | 0.228             | 1196.49 | 1197.38  | 8302.4         | 3                 | 675.4                          | 66.7          | 4          | R.LVQAFQFTDK.H                       |
|                   | Hs293FLP_Ti_302.1968.19  | 3.2418         | 0.2584            | 1196.64 | 1197.38  | 7065.2         | 1                 | 754                            | 77.8          | 1          | R.LVQAFQFTDK.H                       |
|                   | HsGST-MOCK_Ti_403.239    | 3.3922         | 0.2225            | 1196.81 | 1197.38  | 6452.4         | 1                 | 945                            | 77.8          | 2          | R.LVQAFQFTDK.H                       |
|                   | HsFLAG-Control_293_Ti_20 | 3.5748         | 0.2081            | 1197.21 | 1197.38  | 6721.4         | 1                 | 1351.9                         | 88.9          | 5          | R.LVQAFQFTDK.H                       |
|                   | HsFLAG-MOCK_300mM_T      | 3.4805         | 0.3193            | 1197.31 | 1197.38  | 6183.1         | 1                 | 1274.2                         | 88.9          | 4          | R.LVQAFQFTDK.H                       |
|                   | HsHeLa_Control-MG_Ti_20  | 3.9172         | 0.2871            | 1197.43 | 1197.38  | 6133.9         | 1                 | 1309.7                         | 88.9          | 4          | R.LVQAFQFTDK.H                       |
|                   | Hs293FLP-MG_Ti_202.238   | 3.5969         | 0.2004            | 1197.48 | 1197.38  | 6621.3         | 1                 | 1248.7                         | 88.9          | 1          | R.LVQAFQFTDK.H                       |
|                   | HsFLAG-Control_MG_293    | 3.0269         | 0.2236            | 1197.54 | 1197.38  | 8776.2         | 2                 | 799                            | 72.2          | 2          | R.LVQAFQFTDK.H                       |
|                   | Hs293FLP_Ti_302.1967.19  | 3.6331         | 0.2333            | 1197.83 | 1197.38  | 5315.5         | 1                 | 1112.3                         | 88.9          | 2          | R.LVQAFQFTDK.H                       |
|                   | HsHeLa_Control_Ti_103.22 | 3.6438         | 0.2315            | 1198.06 | 1197.38  | 5374.1         | 1                 | 1111.5                         | 88.9          | 3          | R.LVQAFQFTDK.H                       |
|                   | HsFLAG-Control_HeLa_NE   | 2.7029         | 0.201             | 1198.55 | 1197.38  | 7491.3         | 1                 | 632.6                          | 72.2          | 1          | R.LVQAFQFTDK.H                       |
|                   | HsFLAG-MOCK_300mM_T      | 5.9345         | 0.364             | 3585.09 | 3586.01  | 8608.1         | 1                 | 912.2                          | 26.6          | 3          | R.LVQAFQFTDKHGEVCPAGWKPGSDTIKPDVQK.S |
|                   | HsHeLa_Control-MG_Ti_20  | 2.8933         | 0.2991            | 1140.68 | 1141.24  | 7169.4         | 1                 | 913.8                          | 77.8          | 3          | K.HGEVCPAGWK.P                       |
|                   | HsGST-MOCK_Ti_104.147    | 5.1791         | 0.3778            | 2406.71 | 2407.65  | 7436.1         | 1                 | 1142                           | 52.4          | 4          | K.HGEVCPAGWKPGSDTIKPDVQK.S           |
|                   | HsFLAG-MOCK_300mM_T      | 4.5815         | 0.2891            | 2406.98 | 2407.65  | 6657.6         | 1                 | 868                            | 50            | 2          | K.HGEVCPAGWKPGSDTIKPDVQK.S           |
|                   | Hs293FLP_Ti_306.2354.23  | 5.1329         | 0.3059            | 2407.24 | 2407.65  | 7230.9         | 1                 | 1504.8                         | 59.5          | 2          | K.HGEVCPAGWKPGSDTIKPDVQK.S           |
|                   | HsGST-MOCK_Ti_104.147    | 5.3094         | 0.3884            | 2407.36 | 2407.65  | 7793.5         | 1                 | 1904.9                         | 42.9          | 2          | K.HGEVCPAGWKPGSDTIKPDVQK.S           |

|                  |                          |        |        |         |         |         |   |                                          |      |    |                                |
|------------------|--------------------------|--------|--------|---------|---------|---------|---|------------------------------------------|------|----|--------------------------------|
|                  | HsFLAG-MOCK_300mM_T      | 5.2741 | 0.4359 | 2407.4  | 2407.65 | 7989.4  | 1 | 1533.5                                   | 57.1 | 4  | K.HGEVCPAGWKPGSDTIKPDVQK.S     |
|                  | HsHeLa_Control-MG_Ti_20  | 5.0675 | 0.3685 | 2407.6  | 2407.65 | 8247.9  | 1 | 1457.9                                   | 57.1 | 6  | K.HGEVCPAGWKPGSDTIKPDVQK.S     |
|                  | Hs293FLP_Ti_306.2355.23  | 5.0679 | 0.3312 | 2407.81 | 2407.65 | 7154.2  | 1 | 1497.8                                   | 40.5 | 3  | K.HGEVCPAGWKPGSDTIKPDVQK.S     |
|                  | HsHeLa_Control-MG_Ti_20  | 5.4248 | 0.4064 | 2408.09 | 2407.65 | 8569.4  | 1 | 1767.9                                   | 40.5 | 3  | K.HGEVCPAGWKPGSDTIKPDVQK.S     |
|                  | HsFLAG-MOCK_300mM_T      | 5.0147 | 0.2616 | 2408.67 | 2407.65 | 7629.3  | 1 | 1638.2                                   | 41.7 | 2  | K.HGEVCPAGWKPGSDTIKPDVQK.S     |
|                  | HsFLAG-MOCK_300mM_T      | 4.1506 | 0.1762 | 2409.55 | 2407.65 | 6661    | 2 | 786.5                                    | 33.3 | 1  | K.HGEVCPAGWKPGSDTIKPDVQK.S     |
|                  | HsHeLa_Control-MG_Ti_20  | 3.9564 | 0.1671 | 1285.31 | 1285.44 | 7908.9  | 1 | 1520.8                                   | 81.8 | 5  | K.PGSDTIKPDVQK.S               |
| gij 29788785 ref | 98                       | 648    | 0.707  | 444     | 49671   | 4.9     | U | tubulin, beta polypeptide [Homo sapiens] |      |    |                                |
| *                | HsFLAG-Control_HeLa_S1(  | 6.5234 | 0.3157 | 3102.49 | 3104.27 | 7959.4  | 1 | 1262.6                                   | 34.6 | 28 | K.FWEVISDEHGIDPTGTYHGSDQLQDR.I |
| *                | Hs293FLP-MG_Ti_204.283   | 5.5919 | 0.2892 | 3102.85 | 3104.27 | 6486.5  | 1 | 572.2                                    | 27.9 | 4  | K.FWEVISDEHGIDPTGTYHGSDQLQDR.I |
| *                | Hs293FLP-MG_Ti_203.297   | 3.9055 | 0.2996 | 3103.04 | 3104.27 | 4284.6  | 3 | 270.9                                    | 34.6 | 2  | K.FWEVISDEHGIDPTGTYHGSDQLQDR.I |
| *                | HsHeLa_Control-MG_Ti_10  | 2.7152 | 0.2812 | 3103.1  | 3104.27 | 3161.6  | 4 | 192.7                                    | 30.8 | 1  | K.FWEVISDEHGIDPTGTYHGSDQLQDR.I |
| *                | HsHeLa_Control-MG_Ti_20  | 5.7535 | 0.3132 | 3103.97 | 3104.27 | 5903    | 1 | 817.8                                    | 32.7 | 7  | K.FWEVISDEHGIDPTGTYHGSDQLQDR.I |
| *                | HsFLAG-Control_293_Ti_1( | 4.7657 | 0.2504 | 3105.41 | 3104.27 | 10089.4 | 2 | 895.9                                    | 27.9 | 3  | K.FWEVISDEHGIDPTGTYHGSDQLQDR.I |
| *                | HsFLAG-Control_293_Ti_1( | 3.2978 | 0.0863 | 3105.54 | 3104.27 | 5296.9  | 2 | 285.7                                    | 32.7 | 1  | K.FWEVISDEHGIDPTGTYHGSDQLQDR.I |
| *                | HsFLAG-Control_HeLa_S1(  | 2.6089 | 0.2408 | 1301.44 | 1302.43 | 7267.7  | 1 | 529.6                                    | 59.1 | 1  | R.ISVYYNEATGGK.Y               |
| *                | HsFLAG-Control_293_Ti_2( | 2.9076 | 0.2466 | 1301.48 | 1302.43 | 6252.1  | 1 | 662.5                                    | 68.2 | 6  | R.ISVYYNEATGGK.Y               |
| *                | HsHeLa_Control-MG_Ti_20  | 2.8028 | 0.2907 | 1301.6  | 1302.43 | 5328.6  | 1 | 452.5                                    | 63.6 | 2  | R.ISVYYNEATGGK.Y               |
| *                | HsFLAG-Control_HeLa_S1(  | 3.4511 | 0.3687 | 1301.74 | 1302.43 | 6610.2  | 1 | 978.9                                    | 72.7 | 23 | R.ISVYYNEATGGK.Y               |
| *                | Hs283FLP_Ti_102.1523.15  | 3.0796 | 0.2118 | 1302.41 | 1302.43 | 4736.5  | 1 | 813.3                                    | 72.7 | 1  | R.ISVYYNEATGGK.Y               |
| *                | HsFLAG-Control_HeLa_S1(  | 3.8701 | 0.3447 | 1302.45 | 1302.43 | 5644.6  | 1 | 1218.5                                   | 81.8 | 6  | R.ISVYYNEATGGK.Y               |
|                  | HsF-IP-293-MG_Ti_102.23  | 4.2116 | 0.3257 | 1617.72 | 1616.87 | 4090.1  | 1 | 901.5                                    | 75   | 15 | R.AILVDLEPGTMDSVR.S            |
|                  | HsFLAG-Control_293_Ti_1( | 4.3497 | 0.4199 | 2798.44 | 2800.07 | 7089.6  | 1 | 789.7                                    | 42   | 2  | R.SGPFQIFRPDNFVFGQSGAGNNWAK.G  |
|                  | HsFLAG-Control_Hela_Ti_1 | 7.086  | 0.3585 | 2798.77 | 2800.07 | 8023.8  | 1 | 2007.6                                   | 39   | 1  | R.SGPFQIFRPDNFVFGQSGAGNNWAK.G  |
|                  | HsHeLa_Control_Ti_106.35 | 3.3717 | 0.284  | 2799.08 | 2800.07 | 7040.2  | 1 | 509.9                                    | 34   | 1  | R.SGPFQIFRPDNFVFGQSGAGNNWAK.G  |
|                  | HsFLAG-Control_HeLa_NE   | 5.559  | 0.4744 | 2799.13 | 2800.07 | 8777.8  | 1 | 1234                                     | 44   | 3  | R.SGPFQIFRPDNFVFGQSGAGNNWAK.G  |
|                  | Hs293FLP_Ti_306.3134.31  | 4.4896 | 0.3405 | 2799.39 | 2800.07 | 5985.1  | 1 | 712.5                                    | 40   | 3  | R.SGPFQIFRPDNFVFGQSGAGNNWAK.G  |
|                  | HsFLAG-Control_HeLa_S1(  | 5.0217 | 0.2644 | 2799.44 | 2800.07 | 9812.3  | 1 | 1983                                     | 35   | 4  | R.SGPFQIFRPDNFVFGQSGAGNNWAK.G  |
|                  | HsFLAG-Control_Hela_Ti_1 | 4.9745 | 0.3403 | 2799.45 | 2800.07 | 9442    | 1 | 1330.7                                   | 46   | 2  | R.SGPFQIFRPDNFVFGQSGAGNNWAK.G  |
|                  | Hs293FLP-MG_Ti_206.324   | 5.6902 | 0.3542 | 2799.53 | 2800.07 | 9458.1  | 1 | 2291.7                                   | 38   | 3  | R.SGPFQIFRPDNFVFGQSGAGNNWAK.G  |
|                  | HsFLAG-Control_293_Ti_1( | 6.1007 | 0.3859 | 2799.74 | 2800.07 | 9348.5  | 1 | 3099.1                                   | 42   | 2  | R.SGPFQIFRPDNFVFGQSGAGNNWAK.G  |
|                  | HsFLAG-Control_HeLa_S1(  | 5.4454 | 0.3567 | 2799.89 | 2800.07 | 7677.5  | 1 | 1212.9                                   | 46   | 3  | R.SGPFQIFRPDNFVFGQSGAGNNWAK.G  |
|                  | HsHeLa_Control-MG_Ti_20  | 5.2597 | 0.3817 | 2799.92 | 2800.07 | 8298.5  | 1 | 1407.9                                   | 48   | 8  | R.SGPFQIFRPDNFVFGQSGAGNNWAK.G  |
|                  | HsFLAG-Control_HeLa_S1(  | 4.9984 | 0.3992 | 2799.99 | 2800.07 | 8366    | 1 | 1288.2                                   | 46   | 5  | R.SGPFQIFRPDNFVFGQSGAGNNWAK.G  |
|                  | HsHeLa_Control_Ti_106.35 | 5.7438 | 0.2886 | 2800.05 | 2800.07 | 8407.2  | 1 | 2280                                     | 38   | 3  | R.SGPFQIFRPDNFVFGQSGAGNNWAK.G  |
|                  | HsFLAG-Control_HeLa_S1(  | 6.1803 | 0.4125 | 2800.31 | 2800.07 | 9515.8  | 1 | 2575.2                                   | 39   | 10 | R.SGPFQIFRPDNFVFGQSGAGNNWAK.G  |
|                  | Hs293FLP-MG_Ti_206.324   | 4.0474 | 0.285  | 2800.79 | 2800.07 | 6819.9  | 1 | 693.4                                    | 38   | 4  | R.SGPFQIFRPDNFVFGQSGAGNNWAK.G  |
|                  | Hs293FLP_Ti_306.3122.31  | 5.4056 | 0.2637 | 2801.19 | 2800.07 | 8261.6  | 1 | 1963.1                                   | 38   | 2  | R.SGPFQIFRPDNFVFGQSGAGNNWAK.G  |
|                  | HsHeLa_Control-MG_Ti_20  | 6.5624 | 0.445  | 2801.2  | 2800.07 | 8704.9  | 1 | 2240.6                                   | 38   | 7  | R.SGPFQIFRPDNFVFGQSGAGNNWAK.G  |
|                  | HsFLAG-Control_HeLa_NE   | 6.3579 | 0.3994 | 2801.45 | 2800.07 | 8898.9  | 1 | 2491.9                                   | 40   | 3  | R.SGPFQIFRPDNFVFGQSGAGNNWAK.G  |
|                  | HsGST-MOCK_Ti_102.286    | 3.2049 | 0.3313 | 1958.45 | 1960.15 | 8017.5  | 1 | 762.8                                    | 52.9 | 1  | K.GHYTEGAELVDSVLDVVR.K         |
|                  | HsFLAG-Control_HeLa_S1(  | 4.1642 | 0.2955 | 1959.3  | 1960.15 | 8544.6  | 2 | 1215.8                                   | 38.2 | 2  | K.GHYTEGAELVDSVLDVVR.K         |
|                  | HsGST-MOCK_Ti_403.395    | 4.7164 | 0.3422 | 1959.33 | 1960.15 | 10548.9 | 1 | 1301.9                                   | 55.9 | 1  | K.GHYTEGAELVDSVLDVVR.K         |
|                  | HsFLAG-Control_HeLa_NE   | 5.3562 | 0.4242 | 1959.63 | 1960.15 | 11243.1 | 1 | 2825.8                                   | 70.6 | 3  | K.GHYTEGAELVDSVLDVVR.K         |
|                  | Hs293FLP_Ti_303.3357.33  | 4.1617 | 0.1819 | 1959.92 | 1960.15 | 7405    | 2 | 1468.9                                   | 42.6 | 6  | K.GHYTEGAELVDSVLDVVR.K         |
|                  | HsHeLa_Control-MG_Ti_10  | 6.1452 | 0.4266 | 1959.96 | 1960.15 | 8101.6  | 1 | 2856.7                                   | 79.4 | 5  | K.GHYTEGAELVDSVLDVVR.K         |
|                  | Hs293FLP-MG_Ti_205.353   | 4.315  | 0.1813 | 1959.98 | 1960.15 | 9417.8  | 1 | 1643                                     | 41.2 | 5  | K.GHYTEGAELVDSVLDVVR.K         |
|                  | Hs293FLP-MG_Ti_204.367   | 6.6846 | 0.431  | 1959.98 | 1960.15 | 10282.1 | 1 | 3961.5                                   | 82.4 | 8  | K.GHYTEGAELVDSVLDVVR.K         |
|                  | Hs293FLP_Ti_306.3198.31  | 6.98   | 0.3863 | 1960.01 | 1960.15 | 9148.7  | 1 | 3744.2                                   | 85.3 | 7  | K.GHYTEGAELVDSVLDVVR.K         |



|                          |        |        |         |         |         |   |        |      |                                                                 |
|--------------------------|--------|--------|---------|---------|---------|---|--------|------|-----------------------------------------------------------------|
| HsFLAG-Control_HeLa_S1(  | 4.5919 | 0.2553 | 1960.03 | 1960.15 | 7594.6  | 1 | 1242.3 | 41.2 | 2 K.GHYTEGAEVDSVLDVVR.K                                         |
| HsHeLa_Control-MG_Ti_10  | 3.5165 | 0.1922 | 1960.13 | 1960.15 | 6171.6  | 3 | 834.7  | 35.3 | 1 K.GHYTEGAEVDSVLDVVR.K                                         |
| HsHeLa_Control-MG_Ti_20  | 4.3353 | 0.2198 | 1960.22 | 1960.15 | 8005.9  | 1 | 1897.4 | 47.1 | 2 K.GHYTEGAEVDSVLDVVR.K                                         |
| HsFLAG-Control_HeLa_S1(  | 5.8707 | 0.417  | 1960.53 | 1960.15 | 9914.1  | 1 | 3928.7 | 82.4 | 2 K.GHYTEGAEVDSVLDVVR.K                                         |
| HsHeLa_Control-MG_Ti_20  | 6.9239 | 0.4578 | 1960.6  | 1960.15 | 10283.3 | 1 | 4222.7 | 85.3 | 8 K.GHYTEGAEVDSVLDVVR.K                                         |
| HsHeLa_Control_Ti_105.38 | 6.5934 | 0.4301 | 1960.92 | 1960.15 | 9241.8  | 1 | 3541.4 | 82.4 | 7 K.GHYTEGAEVDSVLDVVR.K                                         |
| HsFLAG-Control_HeLa_NE   | 4.632  | 0.1653 | 1961.1  | 1960.15 | 7796.1  | 7 | 1433.4 | 44.1 | 1 K.GHYTEGAEVDSVLDVVR.K                                         |
| HsHeLa_Control_Ti_105.38 | 3.9939 | 0.1774 | 1961.13 | 1960.15 | 6245.6  | 2 | 1192.6 | 45.6 | 2 K.GHYTEGAEVDSVLDVVR.K                                         |
| HsFLAG-Control_HeLa_S1(  | 4.764  | 0.2325 | 1961.21 | 1960.15 | 8029.8  | 1 | 1535   | 42.6 | 2 K.GHYTEGAEVDSVLDVVR.K                                         |
| HsFLAG-Control_HeLa_S1(  | 6.9041 | 0.4463 | 1961.25 | 1960.15 | 11475.7 | 1 | 4165.7 | 82.4 | 14 K.GHYTEGAEVDSVLDVVR.K                                        |
| HsFLAG-Control_HeLa_S1(  | 5.9828 | 0.4073 | 1961.57 | 1960.15 | 10193.9 | 1 | 3020.1 | 76.5 | 5 K.GHYTEGAEVDSVLDVVR.K                                         |
| HsGST-MOCK_Ti_102.285!   | 4.2626 | 0.1599 | 1962    | 1960.15 | 7062.2  | 4 | 1185.6 | 41.2 | 1 K.GHYTEGAEVDSVLDVVR.K                                         |
| Hs293FLP_Ti_306.3098.30! | 6.1016 | 0.4085 | 2088.19 | 2088.33 | 9030.4  | 1 | 2434   | 72.2 | 2 K.GHYTEGAEVDSVLDVVR.K.E                                       |
| HsHeLa_Control_Ti_106.36 | 2.6425 | 0.3564 | 2089.18 | 2088.33 | 10954.4 | 1 | 669    | 41.7 | 1 K.GHYTEGAEVDSVLDVVR.K.E                                       |
| HsFLAG-MOCK_300mM_T      | 4.8098 | 0.3951 | 2089.85 | 2088.33 | 6163.4  | 1 | 1098.1 | 41.7 | 3 K.GHYTEGAEVDSVLDVVR.K.E                                       |
| Hs293FLP_Ti_305.3017.30  | 5.121  | 0.3371 | 2090.41 | 2088.33 | 6587.3  | 1 | 1579.1 | 48.6 | 9 K.GHYTEGAEVDSVLDVVR.K.E                                       |
| HsFLAG-Control_HeLa_S1(  | 2.9498 | 0.2063 | 1077.69 | 1078.17 | 5287.5  | 3 | 749.1  | 85.7 | 5 K.IREEYPDR.I                                                  |
| HsFLAG-MOCK_300mM_T      | 2.7654 | 0.1191 | 2380.24 | 2379.74 | 5288.7  | 1 | 385.4  | 44.7 | 2 K.IREEYPDRIMNTFSVVPSPK.V                                      |
| HsFLAG-Control_MG_293_   | 4.3284 | 0.3282 | 1320.01 | 1320.59 | 8983.2  | 1 | 1855   | 86.4 | 18 R.IMNTFSVVPSPK.V<br>K.VSDTVVEPYNATLSVHQLVENTDETYCIDNEALYDICF |
| HsFLAG-Control_HeLa_S1(  | 5.2299 | 0.4574 | 4594.42 | 4595.9  | 5984.7  | 1 | 689.3  | 24.3 | 26 R.T                                                          |
| HsGST-MOCK_Ti_305.408!   | 4.8022 | 0.4628 | 2708.4  | 2710.04 | 7804.4  | 1 | 972    | 43.8 | 1 K.LTTPTYGDLNHLVSATMSGVTTCLR.F                                 |
| Hs293FLP-MG_Ti_204.386!  | 5.4701 | 0.3771 | 2708.64 | 2710.04 | 9092.1  | 1 | 1386.9 | 45.8 | 2 K.LTTPTYGDLNHLVSATMSGVTTCLR.F                                 |
| HsF-IP-293-MG_Ti_106.26! | 5.1039 | 0.31   | 2708.65 | 2710.04 | 6253.5  | 1 | 929.3  | 45.8 | 6 K.LTTPTYGDLNHLVSATMSGVTTCLR.F                                 |
| Hs293FLP-MG_Ti_204.386   | 3.7503 | 0.32   | 2709.13 | 2710.04 | 7710.2  | 1 | 762.9  | 29.2 | 1 K.LTTPTYGDLNHLVSATMSGVTTCLR.F                                 |
| HsHeLa_Control-MG_Ti_10  | 4.2137 | 0.4906 | 2709.32 | 2710.04 | 6602.6  | 1 | 706.6  | 39.6 | 1 K.LTTPTYGDLNHLVSATMSGVTTCLR.F                                 |
| HsFLAG-MOCK_300mM_T      | 3.5898 | 0.1924 | 2709.57 | 2710.04 | 8016.1  | 2 | 734.5  | 28.1 | 1 K.LTTPTYGDLNHLVSATMSGVTTCLR.F                                 |
| HsF-IP-293-MG_Ti_106.26! | 3.9395 | 0.217  | 2709.94 | 2710.04 | 7857.5  | 1 | 880.7  | 30.2 | 1 K.LTTPTYGDLNHLVSATMSGVTTCLR.F                                 |
| HsHeLa3_Ti_105.3722.372! | 4.5547 | 0.4711 | 2710.06 | 2710.04 | 7677.4  | 1 | 1059.3 | 43.8 | 3 K.LTTPTYGDLNHLVSATMSGVTTCLR.F                                 |
| HsHeLa_Control-MG_Ti_10  | 4.0048 | 0.2452 | 2712.04 | 2710.04 | 8274.3  | 1 | 1108.1 | 33.3 | 1 K.LTTPTYGDLNHLVSATMSGVTTCLR.F                                 |
| HsFLAG-Control_293_Ti_2( | 2.3562 | 0.2676 | 1130.49 | 1131.28 | 3790.3  | 1 | 334.2  | 72.2 | 1 R.FPGQLNADLR.K                                                |
| HsFLAG-Control_HeLa_S1(  | 3.3308 | 0.1729 | 1130.86 | 1131.28 | 4313.3  | 1 | 873.6  | 88.9 | 23 R.FPGQLNADLR.K                                               |
| HsFLAG-Control_MG_293_   | 3.206  | 0.113  | 1130.88 | 1131.28 | 3899.4  | 1 | 816.9  | 88.9 | 6 R.FPGQLNADLR.K                                                |
| HsFLAG-Control_HeLa_S1(  | 2.9598 | 0.1628 | 1259.33 | 1259.45 | 6893.9  | 1 | 1452.3 | 90   | 5 R.FPGQLNADLR.K.L                                              |
| HsHeLa_Control-MG_Ti_10  | 3.4275 | 0.2361 | 1272.73 | 1272.59 | 5940.6  | 2 | 973.4  | 75   | 2 R.KLAVNMVFPFR.L                                               |
| HsF-IP-293-MG_Ti_104.21! | 3.5921 | 0.3097 | 1145.56 | 1144.42 | 4625.3  | 1 | 875.9  | 88.9 | 19 K.LAVNMVFPFR.L                                               |
| HsGST-MOCK_Ti_102.257!   | 3.0182 | 0.4314 | 1621.6  | 1621.94 | 4033.6  | 1 | 699.6  | 69.2 | 2 R.LHFFMPGFAPLTSR.G                                            |
| HsFLAG-Control_HeLa_S1(  | 3.7113 | 0.3398 | 1660.48 | 1660.91 | 4103.1  | 1 | 587.1  | 64.3 | 4 R.ALTVPCLTQQVFDK.N                                            |
| HsF-IP-293-MG_Ti_102.26! | 4.0023 | 0.2995 | 1660.57 | 1660.91 | 3003.5  | 1 | 516.3  | 71.4 | 12 R.ALTVPCLTQQVFDK.N                                           |
| HsFLAG-Control_HeLa_S1(  | 3.5243 | 0.335  | 1661.25 | 1660.91 | 4187.5  | 1 | 667.9  | 67.9 | 8 R.ALTVPCLTQQVFDK.N                                            |
| HsFLAG-Control_HeLa_S1(  | 4.0003 | 0.3286 | 1661.47 | 1660.91 | 6963.9  | 2 | 1179.9 | 48.2 | 2 R.ALTVPCLTQQVFDK.N                                            |
| HsFlag1P_Ti_102.3255.325 | 4.1345 | 0.2164 | 1661.56 | 1660.91 | 3304    | 1 | 549.2  | 67.9 | 38 R.ALTVPCLTQQVFDK.N                                           |
| HsFLAG-Control_HeLa_S1(  | 3.9345 | 0.3293 | 1661.69 | 1660.91 | 6050.2  | 1 | 887    | 48.2 | 1 R.ALTVPCLTQQVFDK.N                                            |
| HsFLAG-Control_HeLa_S1(  | 3.5036 | 0.1847 | 1663.51 | 1660.91 | 6802.9  | 1 | 1027.4 | 48.2 | 1 R.ALTVPCLTQQVFDK.N                                            |
| HsHeLa-FLAG-IP_S100_Ti   | 2.9555 | 0.2199 | 1068.25 | 1066.2  | 7345.1  | 2 | 1221.1 | 81.2 | 2 K.NMMAACDPR.H                                                 |
| HsFLAG-Control_HeLa_NE   | 3.3095 | 0.3087 | 1040.83 | 1040.25 | 5846.9  | 1 | 1088.4 | 93.8 | 50 R.YLTVAVFR.G                                                 |
| HsGST-MOCK_Ti_402.200!   | 3.2807 | 0.1162 | 1445.58 | 1447.6  | 4353.1  | 1 | 621.9  | 77.3 | 1 K.EVDEQMLNVQNK.N                                              |
| HsFLAG-Control_293_Ti_2( | 3.0439 | 0.1965 | 1446.48 | 1447.6  | 5427.8  | 1 | 667.1  | 72.7 | 2 K.EVDEQMLNVQNK.N                                              |
| HsHeLa_Control_Ti_102.15 | 2.3866 | 0.11   | 1446.59 | 1447.6  | 3600.8  | 3 | 304.9  | 63.6 | 1 K.EVDEQMLNVQNK.N                                              |

|                   |                          |        |        |         |         |        |     |        |      |    |                                           |
|-------------------|--------------------------|--------|--------|---------|---------|--------|-----|--------|------|----|-------------------------------------------|
|                   | HsFLAG-Control_MG_293_   | 3.1945 | 0.1644 | 1447.26 | 1447.6  | 5122.2 | 1   | 556.1  | 68.2 | 1  | K.EVDEQMLNVQNK.N                          |
|                   | HsHeLa-FLAG-IP_S100_Ti   | 4.4378 | 0.162  | 1447.32 | 1447.6  | 7508.9 | 6   | 1453   | 77.3 | 14 | K.EVDEQMLNVQNK.N                          |
|                   | HsFLAG-Control_HeLa_S10  | 2.6394 | 0.1147 | 1447.42 | 1447.6  | 5226.8 | 1   | 438.1  | 63.6 | 2  | K.EVDEQMLNVQNK.N                          |
|                   | Hs293FLP-MG_Ti_102.177   | 3.6404 | 0.1591 | 1447.47 | 1447.6  | 6074.7 | 1   | 1112.2 | 72.7 | 2  | K.EVDEQMLNVQNK.N                          |
|                   | HsFLAG-Control_HeLa_S10  | 4.4307 | 0.2086 | 1449.29 | 1447.6  | 7304.9 | 1   | 1751.9 | 86.4 | 2  | K.EVDEQMLNVQNK.N                          |
|                   | HsFLAG-Control_HeLa_S10  | 4.2481 | 0.345  | 1697.72 | 1697.89 | 5597.6 | 1   | 913.8  | 69.2 | 79 | K.NSSYFVEWIPNNVK.T                        |
|                   | HsHeLa-FLAG-IP_S100_Ti   | 2.8782 | 0.1885 | 1029.7  | 1029.15 | 5615.6 | 1   | 1184.8 | 87.5 | 8  | K.TAVCDIPPR.G                             |
| *                 | HsGST-MOCK_Ti_403.422    | 5.0814 | 0.456  | 1870.76 | 1871.2  | 7723.1 | 1   | 1992.8 | 71.9 | 23 | K.MAVTFIGNSTAIQELFK.R                     |
|                   | HsHeLa_Control-MG_Ti_10  | 3.5998 | 0.3059 | 1388.48 | 1386.61 | 7275   | 1   | 1173.3 | 80   | 3  | K.RISEQFTAMFR.R                           |
| gi 6005814 ref NF |                          | 204    | 1626   | 0.684   | 465     | 54190  | 7.2 | U      |      |    | serine/threonine kinase 38 [Homo sapiens] |
| *                 | HsFLAG-Control_HeLa_S10  | 4.9334 | 0.3902 | 2062.85 | 2064.26 | 7844.9 | 1   | 1440.9 | 65.6 | 8  | K.VTLENFYSNLIAQHEER.E                     |
| *                 | HsFLAG-MOCK_150mM_T      | 4.3519 | 0.1851 | 2062.96 | 2064.26 | 4406.1 | 1   | 1017.9 | 50   | 5  | K.VTLENFYSNLIAQHEER.E                     |
| *                 | HsFLAG-MOCK_300mM_T      | 5.6916 | 0.4795 | 2063.56 | 2064.26 | 7180   | 1   | 1942.3 | 75   | 12 | K.VTLENFYSNLIAQHEER.E                     |
| *                 | HsFLAG-Control_HeLa_S10  | 5.14   | 0.429  | 2063.56 | 2064.26 | 8421.8 | 1   | 1218.7 | 62.5 | 17 | K.VTLENFYSNLIAQHEER.E                     |
| *                 | HsFlag1P_Ti_105.3138.313 | 5.2846 | 0.4385 | 2063.58 | 2064.26 | 7655   | 1   | 1760.6 | 71.9 | 7  | K.VTLENFYSNLIAQHEER.E                     |
| *                 | HsFLAG-Control_HeLa_NE   | 5.1143 | 0.4089 | 2063.66 | 2064.26 | 8101.1 | 1   | 1478.4 | 65.6 | 18 | K.VTLENFYSNLIAQHEER.E                     |
| *                 | HsFlag1P_Ti_105.3147.314 | 4.0704 | 0.199  | 2063.75 | 2064.26 | 6297.5 | 1   | 1759.8 | 54.7 | 2  | K.VTLENFYSNLIAQHEER.E                     |
| *                 | HsFLAG-Control_HeLa_S10  | 4.7778 | 0.4211 | 2063.79 | 2064.26 | 8072   | 1   | 1178.1 | 59.4 | 28 | K.VTLENFYSNLIAQHEER.E                     |
| *                 | HsFLAG-Control_HeLa_S10  | 4.0208 | 0.2775 | 2064.01 | 2064.26 | 5360.5 | 2   | 1092.5 | 46.9 | 1  | K.VTLENFYSNLIAQHEER.E                     |
| *                 | Hs293FLP-MG_Ti_203.327   | 3.6924 | 0.1638 | 2064.05 | 2064.26 | 4451.6 | 1   | 863.7  | 46.9 | 1  | K.VTLENFYSNLIAQHEER.E                     |
| *                 | HsHeLa_Control-MG_Ti_20  | 4.1787 | 0.2334 | 2064.1  | 2064.26 | 5075.6 | 1   | 1025   | 48.4 | 1  | K.VTLENFYSNLIAQHEER.E                     |
| *                 | HsF-IP-293-MG_Ti_106.24  | 5.4612 | 0.5032 | 2064.16 | 2064.26 | 6424.6 | 1   | 1383   | 68.8 | 20 | K.VTLENFYSNLIAQHEER.E                     |
| *                 | HsFLAG-Control_HeLa_NE   | 3.9943 | 0.244  | 2064.18 | 2064.26 | 5533.6 | 2   | 1249.3 | 48.4 | 3  | K.VTLENFYSNLIAQHEER.E                     |
| *                 | HsHeLa_Control-MG_Ti_20  | 5.6595 | 0.4541 | 2064.31 | 2064.26 | 7446.6 | 1   | 1578.6 | 68.8 | 6  | K.VTLENFYSNLIAQHEER.E                     |
| *                 | HsFLAG-MOCK_300mM_T      | 3.6345 | 0.123  | 2064.5  | 2064.26 | 4164.5 | 1   | 916.6  | 46.9 | 1  | K.VTLENFYSNLIAQHEER.E                     |
| *                 | HsFLAG-Control_HeLa_S10  | 3.9541 | 0.1355 | 2065.67 | 2064.26 | 5180.8 | 2   | 830.3  | 40.6 | 4  | K.VTLENFYSNLIAQHEER.E                     |
| *                 | HsHeLa_Control_Ti_105.34 | 5.1825 | 0.4029 | 2065.87 | 2064.26 | 7053.7 | 1   | 1437.6 | 65.6 | 42 | K.VTLENFYSNLIAQHEER.E                     |
| *                 | HsFLAG-Control_HeLa_Ti_1 | 4.1552 | 0.1588 | 2066.04 | 2064.26 | 4343.1 | 1   | 847.5  | 46.9 | 2  | K.VTLENFYSNLIAQHEER.E                     |
| *                 | HsFLAG-MOCK_300mM_T      | 4.3947 | 0.241  | 1436.4  | 1436.57 | 9062.4 | 1   | 2019.2 | 86.4 | 20 | K.VMEEEEGLKDEEK.R                         |
| *                 | HsFlag1P_Ti_102.1627.162 | 4.3785 | 0.2716 | 1593.28 | 1592.76 | 9261.9 | 1   | 2237.6 | 79.2 | 7  | K.VMEEEEGLKDEEK.R.L                       |
| *                 | HsFlag1P_Ti_105.2528.252 | 3.9601 | 0.2971 | 1409.61 | 1408.59 | 6077.5 | 1   | 1286.7 | 81.8 | 11 | R.TRLGLEDFESLK.V                          |
| *                 | HsFLAG-Control_HeLa_S10  | 2.4953 | 0.2388 | 1150.45 | 1151.3  | 8708.6 | 3   | 724.2  | 66.7 | 1  | R.LGLEDFESLK.V                            |
| *                 | HsFLAG-Control_HeLa_NE   | 2.769  | 0.1711 | 1150.49 | 1151.3  | 9603.8 | 1   | 930.3  | 72.2 | 2  | R.LGLEDFESLK.V                            |
| *                 | HsFlag1P_Ti_102.2890.289 | 2.9387 | 0.1798 | 1150.5  | 1151.3  | 8421.8 | 1   | 791    | 72.2 | 3  | R.LGLEDFESLK.V                            |
| *                 | HsFLAG-Control_HeLa_NE   | 2.5409 | 0.106  | 1150.52 | 1151.3  | 7149.5 | 1   | 686.1  | 72.2 | 3  | R.LGLEDFESLK.V                            |
| *                 | HsFLAG-MOCK_300mM_T      | 2.5861 | 0.1201 | 1150.52 | 1151.3  | 7006.4 | 4   | 590    | 66.7 | 2  | R.LGLEDFESLK.V                            |
| *                 | Hs283FLP_Ti_102.2438.24  | 2.8714 | 0.1487 | 1150.58 | 1151.3  | 7133.1 | 1   | 704.8  | 72.2 | 2  | R.LGLEDFESLK.V                            |
| *                 | HsFLAG-MOCK_150mM_T      | 2.6574 | 0.1761 | 1150.64 | 1151.3  | 8198.7 | 2   | 734.7  | 72.2 | 3  | R.LGLEDFESLK.V                            |
| *                 | Hs293FLP-MG_Ti_102.302   | 3.6038 | 0.2182 | 1150.67 | 1151.3  | 5377.8 | 2   | 1025.2 | 88.9 | 5  | R.LGLEDFESLK.V                            |
| *                 | Hs293FLP_Ti_302.2646.26  | 2.7967 | 0.1206 | 1150.71 | 1151.3  | 7667.1 | 3   | 719.5  | 72.2 | 2  | R.LGLEDFESLK.V                            |
| *                 | HsHeLa_Control-MG_Ti_10  | 2.6701 | 0.1897 | 1150.72 | 1151.3  | 6179.3 | 2   | 571.2  | 72.2 | 3  | R.LGLEDFESLK.V                            |
| *                 | Hs293FLP-MG_Ti_102.295   | 2.1544 | 0.1091 | 1150.73 | 1151.3  | 7427.9 | 2   | 581.1  | 66.7 | 1  | R.LGLEDFESLK.V                            |
| *                 | HsHeLa_Control-MG_Ti_20  | 3.4627 | 0.1766 | 1151.14 | 1151.3  | 6068.1 | 5   | 1006.5 | 83.3 | 4  | R.LGLEDFESLK.V                            |
| *                 | HsFLAG-Control_HeLa_S10  | 3.6234 | 0.1446 | 1151.19 | 1151.3  | 6336.9 | 1   | 1233.5 | 88.9 | 8  | R.LGLEDFESLK.V                            |
| *                 | HsFLAG-Control_HeLa_NE   | 3.3148 | 0.2925 | 1151.21 | 1151.3  | 6855.7 | 2   | 1076   | 83.3 | 16 | R.LGLEDFESLK.V                            |
| *                 | HsFLAG-Control_HeLa_NE   | 3.7265 | 0.235  | 1151.38 | 1151.3  | 5732.1 | 1   | 1196.7 | 88.9 | 7  | R.LGLEDFESLK.V                            |
| *                 | HsFLAG-MOCK_300mM_T      | 3.4432 | 0.2051 | 1151.4  | 1151.3  | 4724.1 | 3   | 947.4  | 83.3 | 3  | R.LGLEDFESLK.V                            |
| *                 | Hs283FLP_Ti_103.2279.22  | 3.1896 | 0.1636 | 1151.42 | 1151.3  | 4505.5 | 1   | 1002.3 | 88.9 | 4  | R.LGLEDFESLK.V                            |
| *                 | Hs293FLP_Ti_302.2642.26  | 3.247  | 0.1087 | 1151.5  | 1151.3  | 4357.1 | 2   | 928    | 83.3 | 2  | R.LGLEDFESLK.V                            |

|   |                          |        |        |         |         |         |   |        |      |    |                                     |
|---|--------------------------|--------|--------|---------|---------|---------|---|--------|------|----|-------------------------------------|
| * | HsFLAG-MOCK_150mM_T      | 3.5719 | 0.1926 | 1151.52 | 1151.3  | 4955.5  | 1 | 1138.4 | 88.9 | 2  | R.LGLEDFESLK.V                      |
| * | HsFLAG-Control_293_Ti_20 | 2.4831 | 0.1222 | 1152.61 | 1151.3  | 7451.1  | 2 | 582.4  | 66.7 | 1  | R.LGLEDFESLK.V                      |
| * | HsFLAG-Control_293_Ti_20 | 3.42   | 0.2484 | 1152.67 | 1151.3  | 5344    | 3 | 1092.9 | 88.9 | 25 | R.LGLEDFESLK.V                      |
| * | HsHeLa-FLAG-IP_S100_Ti_  | 3.6351 | 0.2162 | 1152.98 | 1151.3  | 4539.9  | 1 | 991.1  | 88.9 | 89 | R.LGLEDFESLK.V                      |
| * | HsFlag1P_Ti_106.2849.284 | 4.655  | 0.4147 | 1575.8  | 1576.83 | 8723.8  | 1 | 2206.7 | 80.8 | 4  | R.LGLEDFESLKVIGR.G                  |
| * | HsFLAG-Control_293_Ti_20 | 2.7915 | 0.3415 | 1149.57 | 1150.34 | 6569.7  | 1 | 683.8  | 66.7 | 6  | K.KDTGHVYAMK.I                      |
| * | HsF-IP-293-MG_Ti_103.118 | 2.2643 | 0.2318 | 1021.34 | 1022.16 | 5592.7  | 1 | 744.8  | 68.8 | 3  | K.DTGHVYAMK.I                       |
| * | HsHeLa-FLAG-IP_S100_Ti_  | 2.6361 | 0.1611 | 1022.23 | 1022.16 | 7088.3  | 2 | 899.8  | 87.5 | 1  | K.DTGHVYAMK.I                       |
| * | HsFLAG-Control_HeLa_NE   | 2.5583 | 0.2486 | 1023.38 | 1022.16 | 6372.7  | 1 | 792.7  | 68.8 | 7  | K.DTGHVYAMK.I                       |
| * | HsFlag1P_Ti_106.2276.227 | 4.9294 | 0.4106 | 1654.21 | 1654.93 | 8414.1  | 1 | 2336.4 | 84.6 | 1  | R.KADMLEKEQVGHIR.A                  |
| * | HsFlag1P_Ti_106.2120.212 | 2.5182 | 0.1345 | 1194.78 | 1195.32 | 5759.7  | 4 | 555.2  | 77.8 | 1  | K.EQVGHIRAER.D                      |
| * | HsFlag1P_Ti_106.2901.290 | 5.0794 | 0.3802 | 1844.61 | 1844.12 | 8415.4  | 1 | 2384.2 | 80   | 6  | R.AERDILVEADSLWVVK.M                |
| * | HsFlag1P_Ti_104.3539.353 | 5.2372 | 0.2624 | 1486.53 | 1487.74 | 8265.5  | 1 | 2564.1 | 87.5 | 11 | R.DILVEADSLWVVK.M                   |
| * | Hs283FLP_Ti_106.2641.26  | 2.8804 | 0.3221 | 1486.72 | 1487.74 | 9047.1  | 1 | 1340.2 | 70.8 | 1  | R.DILVEADSLWVVK.M                   |
| * | HsFLAG-Control_Hela_Ti_1 | 2.6063 | 0.239  | 1486.77 | 1487.74 | 7414.3  | 1 | 758.7  | 62.5 | 1  | R.DILVEADSLWVVK.M                   |
| * | HsFLAG-Control_HeLa_NE   | 5.6598 | 0.2186 | 1487.42 | 1487.74 | 7868.5  | 1 | 2550.6 | 87.5 | 65 | R.DILVEADSLWVVK.M                   |
| * | Hs283FLP_Ti_104.2787.27  | 5.4767 | 0.2557 | 1487.58 | 1487.74 | 6993    | 1 | 2191.4 | 87.5 | 14 | R.DILVEADSLWVVK.M                   |
| * | HsHeLa_Control-MG_Ti_10  | 2.3171 | 0.1532 | 1065.57 | 1066.22 | 6077.8  | 6 | 529.4  | 71.4 | 3  | K.MFYSFQDK.L                        |
| * | HsHeLa_Control-MG_Ti_20  | 7.3841 | 0.2715 | 3619.21 | 3620.05 | 10348.7 | 1 | 3165.6 | 37.5 | 16 | K.KDTLTEEETQFYIAETVLAIDSIHQLGFIHR.D |
| * | HsFLAG-MOCK_300mM_T      | 6.2328 | 0.3063 | 3491.37 | 3491.88 | 7147.5  | 1 | 962    | 27.6 | 35 | K.DTLTEEETQFYIAETVLAIDSIHQLGFIHR.D  |
| * | HsFLAG-Control_HeLa_S10  | 2.2427 | 0.1847 | 1370.45 | 1371.57 | 7138.4  | 3 | 535    | 59.1 | 1  | R.DIKPDNLLLLDSK.G                   |
| * | HsFLAG-Control_293_Ti_20 | 2.4949 | 0.2532 | 1370.49 | 1371.57 | 6485.7  | 1 | 678.9  | 63.6 | 2  | R.DIKPDNLLLLDSK.G                   |
| * | HsFLAG-Control_HeLa_NE   | 2.9936 | 0.243  | 1370.66 | 1371.57 | 6289.6  | 1 | 814.8  | 68.2 | 2  | R.DIKPDNLLLLDSK.G                   |
| * | HsFLAG-Control_HeLa_NE   | 2.8242 | 0.2634 | 1370.71 | 1371.57 | 7289.9  | 1 | 757.9  | 63.6 | 2  | R.DIKPDNLLLLDSK.G                   |
| * | HsFLAG-Control_HeLa_NE   | 2.4132 | 0.2248 | 1370.72 | 1371.57 | 7508.5  | 1 | 722.9  | 63.6 | 2  | R.DIKPDNLLLLDSK.G                   |
| * | HsHeLa_Control-MG_Ti_10  | 2.0152 | 0.1916 | 1370.74 | 1371.57 | 5548.3  | 3 | 490.7  | 54.5 | 1  | R.DIKPDNLLLLDSK.G                   |
| * | HsFLAG-Control_293_Ti_20 | 3.4334 | 0.1844 | 1371.08 | 1371.57 | 3413.3  | 2 | 502.1  | 72.7 | 31 | R.DIKPDNLLLLDSK.G                   |
| * | HsFlag1P_Ti_105.2216.221 | 3.2861 | 0.169  | 1371.38 | 1371.57 | 3851.5  | 2 | 810.7  | 81.8 | 5  | R.DIKPDNLLLLDSK.G                   |
| * | HsHeLa_Control-MG_Ti_20  | 3.3575 | 0.1683 | 1371.52 | 1371.57 | 3777.7  | 1 | 584.4  | 72.7 | 13 | R.DIKPDNLLLLDSK.G                   |
| * | HsFlag1P_Ti_102.2283.228 | 2.8374 | 0.1057 | 1371.64 | 1371.57 | 4945.8  | 1 | 648.1  | 68.2 | 2  | R.DIKPDNLLLLDSK.G                   |
| * | HsHeLa_Control_Ti_103.21 | 2.8054 | 0.1729 | 1371.67 | 1371.57 | 4863.6  | 1 | 601.8  | 68.2 | 2  | R.DIKPDNLLLLDSK.G                   |
| * | HsFLAG-Control_HeLa_S10  | 3.166  | 0.1906 | 1371.7  | 1371.57 | 3575.3  | 1 | 456    | 68.2 | 15 | R.DIKPDNLLLLDSK.G                   |
| * | HsFLAG-Control_HeLa_NE   | 3.5379 | 0.1499 | 1371.7  | 1371.57 | 3841.1  | 1 | 721.5  | 77.3 | 11 | R.DIKPDNLLLLDSK.G                   |
| * | HsFLAG-Control_HeLa_NE   | 3.3765 | 0.1747 | 1371.76 | 1371.57 | 3451.3  | 1 | 666.8  | 77.3 | 4  | R.DIKPDNLLLLDSK.G                   |
| * | HsFLAG-Control_Hela_Ti_1 | 2.8272 | 0.1721 | 1371.78 | 1371.57 | 3420.5  | 1 | 455.6  | 68.2 | 2  | R.DIKPDNLLLLDSK.G                   |
| * | HsFLAG-Control_HeLa_NE   | 3.6515 | 0.2182 | 1372.69 | 1371.57 | 3441.8  | 1 | 606.2  | 77.3 | 5  | R.DIKPDNLLLLDSK.G                   |
| * | HsFlag1P_Ti_106.2416.241 | 4.0489 | 0.3299 | 1793.46 | 1793.07 | 6149.6  | 1 | 861.2  | 60   | 2  | R.DIKPDNLLLLDSKGHVK.L               |
| * | HsFLAG-Control_HeLa_NE   | 2.7142 | 0.1639 | 1014.24 | 1015.15 | 8054.2  | 1 | 786.1  | 75   | 7  | K.PDNLLLLDSK.G                      |
| * | HsFLAG-Control_293_Ti_20 | 2.6151 | 0.2965 | 1210.33 | 1211.37 | 5258.2  | 1 | 695.6  | 70   | 4  | K.LSDFGLCTGLK.K                     |
| * | HsFLAG-Control_HeLa_NE   | 2.5471 | 0.2723 | 1210.38 | 1211.37 | 5294.4  | 1 | 605    | 65   | 5  | K.LSDFGLCTGLK.K                     |
| * | HsHeLa_Control-MG_Ti_20  | 2.5733 | 0.2852 | 1210.38 | 1211.37 | 4203.2  | 1 | 377.7  | 55   | 2  | K.LSDFGLCTGLK.K                     |
| * | HsFLAG-Control_MG_293_   | 2.5821 | 0.3547 | 1210.39 | 1211.37 | 5238.7  | 1 | 636.4  | 65   | 4  | K.LSDFGLCTGLK.K                     |
| * | Hs293FLP_TREX_Ti_102.2   | 2.6622 | 0.2892 | 1210.4  | 1211.37 | 4466    | 1 | 478.7  | 60   | 2  | K.LSDFGLCTGLK.K                     |
| * | Hs293FLP-MG_Ti_202.251   | 2.3237 | 0.2827 | 1210.45 | 1211.37 | 4990    | 1 | 490.7  | 60   | 1  | K.LSDFGLCTGLK.K                     |
| * | HsFLAG-MOCK_300mM_T      | 2.6108 | 0.361  | 1210.47 | 1211.37 | 4601.5  | 1 | 551.2  | 65   | 3  | K.LSDFGLCTGLK.K                     |
| * | HsF-IP-293-MG_Ti_102.19  | 2.4689 | 0.2527 | 1210.49 | 1211.37 | 4535    | 1 | 547.2  | 65   | 2  | K.LSDFGLCTGLK.K                     |
| * | HsHeLa-FLAG-IP_S100_Ti_  | 1.8467 | 0.1459 | 1210.53 | 1211.37 | 4890.3  | 1 | 392    | 55   | 1  | K.LSDFGLCTGLK.K                     |
| * | Hs283FLP_Ti_102.2003.20  | 2.6768 | 0.2557 | 1210.55 | 1211.37 | 4679.7  | 1 | 568.8  | 65   | 2  | K.LSDFGLCTGLK.K                     |
| * | HsFLAG-Control_HeLa_NE   | 2.5274 | 0.3029 | 1210.58 | 1211.37 | 5048.5  | 1 | 631.1  | 70   | 2  | K.LSDFGLCTGLK.K                     |

|   |                          |        |        |         |         |        |   |        |      |    |                               |
|---|--------------------------|--------|--------|---------|---------|--------|---|--------|------|----|-------------------------------|
|   | HsFLAG-Control_HeLa_S10  | 2.3076 | 0.2541 | 1210.58 | 1211.37 | 5353.8 | 2 | 480.4  | 60   | 2  | K.LSDFGLCTGLK.K               |
|   | HsFLAG-Control_Hela_Ti_1 | 2.1004 | 0.2798 | 1210.61 | 1211.37 | 5239.4 | 4 | 310.3  | 50   | 2  | K.LSDFGLCTGLK.K               |
|   | HsHeLa_Control_Ti_103.23 | 2.6092 | 0.2765 | 1210.62 | 1211.37 | 4162.2 | 1 | 422.2  | 60   | 2  | K.LSDFGLCTGLK.K               |
|   | HsFLAG-MOCK_150mM_T      | 2.5559 | 0.2977 | 1210.63 | 1211.37 | 4371.3 | 1 | 557.2  | 65   | 2  | K.LSDFGLCTGLK.K               |
|   | Hs293FLP_Ti_302.2103.21  | 2.4897 | 0.2237 | 1210.7  | 1211.37 | 4081.1 | 1 | 469.5  | 60   | 2  | K.LSDFGLCTGLK.K               |
|   | HsHeLa_Control-MG_Ti_10  | 2.4806 | 0.2699 | 1210.72 | 1211.37 | 3999.7 | 1 | 436.9  | 60   | 2  | K.LSDFGLCTGLK.K               |
|   | Hs293FLP-MG_Ti_102.243   | 2.2777 | 0.1812 | 1210.73 | 1211.37 | 4149.3 | 2 | 375.8  | 55   | 2  | K.LSDFGLCTGLK.K               |
|   | HsFLAG-Control_293_Ti_20 | 4.0226 | 0.2724 | 1211.17 | 1211.37 | 6036.8 | 1 | 1564.9 | 90   | 3  | K.LSDFGLCTGLK.K               |
|   | HsFLAG-Control_HeLa_NE   | 3.8264 | 0.3062 | 1211.23 | 1211.37 | 5545   | 2 | 1300   | 85   | 9  | K.LSDFGLCTGLK.K               |
|   | HsFLAG-Control_HeLa_NE   | 3.9803 | 0.2422 | 1211.24 | 1211.37 | 6010.2 | 1 | 1532.1 | 90   | 6  | K.LSDFGLCTGLK.K               |
|   | Hs293FLP_TREX_Ti_102.2   | 3.8489 | 0.3113 | 1211.25 | 1211.37 | 5383.6 | 1 | 1329.4 | 85   | 4  | K.LSDFGLCTGLK.K               |
|   | HsFLAG-Control_HeLa_S10  | 4.022  | 0.2854 | 1211.26 | 1211.37 | 5874   | 2 | 1516.2 | 90   | 11 | K.LSDFGLCTGLK.K               |
|   | HsHeLa-FLAG-IP_S100_Ti   | 4.1443 | 0.3235 | 1211.29 | 1211.37 | 5663.3 | 1 | 1567.1 | 90   | 52 | K.LSDFGLCTGLK.K               |
|   | HsF-IP-293-MG_Ti_102.197 | 3.8997 | 0.3475 | 1211.31 | 1211.37 | 5359.9 | 1 | 1521.9 | 90   | 4  | K.LSDFGLCTGLK.K               |
|   | Hs293FLP-MG_Ti_202.252   | 4.1153 | 0.3165 | 1211.32 | 1211.37 | 6077.1 | 1 | 1604.4 | 90   | 1  | K.LSDFGLCTGLK.K               |
|   | HsFLAG-Control_HeLa_NE   | 4.0494 | 0.2091 | 1211.32 | 1211.37 | 5901.1 | 1 | 1581.2 | 90   | 2  | K.LSDFGLCTGLK.K               |
|   | HsFLAG-MOCK_150mM_T      | 3.9522 | 0.2989 | 1211.44 | 1211.37 | 5985.5 | 1 | 1555.7 | 90   | 2  | K.LSDFGLCTGLK.K               |
|   | HsHeLa_Control-MG_Ti_20  | 3.9398 | 0.2841 | 1211.46 | 1211.37 | 7189.5 | 1 | 1564.6 | 85   | 2  | K.LSDFGLCTGLK.K               |
|   | Hs283FLP_Ti_102.2001.20  | 4.0562 | 0.3185 | 1211.48 | 1211.37 | 5413.7 | 1 | 1513.2 | 90   | 2  | K.LSDFGLCTGLK.K               |
|   | HsFlag1P_Ti_103.2474.247 | 2.3605 | 0.2426 | 1211.55 | 1211.37 | 5138.1 | 1 | 478.4  | 60   | 3  | K.LSDFGLCTGLK.K               |
|   | HsHeLa_Control-MG_Ti_10  | 3.9558 | 0.3415 | 1211.65 | 1211.37 | 5209.5 | 1 | 1430.3 | 90   | 2  | K.LSDFGLCTGLK.K               |
|   | HsHeLa_Control_Ti_103.23 | 3.7085 | 0.2509 | 1212.02 | 1211.37 | 5631.6 | 1 | 1225.4 | 85   | 2  | K.LSDFGLCTGLK.K               |
|   | HsFlag1P_Ti_102.2452.245 | 3.9867 | 0.2505 | 1212.23 | 1211.37 | 5494   | 1 | 1425.2 | 90   | 6  | K.LSDFGLCTGLK.K               |
|   | HsFLAG-MOCK_300mM_T      | 3.9448 | 0.2963 | 1212.46 | 1211.37 | 5598.4 | 1 | 1438.9 | 90   | 3  | K.LSDFGLCTGLK.K               |
|   | HsFLAG-Control_MG_293_   | 3.8678 | 0.3049 | 1212.47 | 1211.37 | 6343.4 | 1 | 1641.9 | 90   | 5  | K.LSDFGLCTGLK.K               |
|   | Hs293FLP-MG_Ti_102.242   | 3.5428 | 0.1193 | 1212.59 | 1211.37 | 5107.3 | 1 | 1225.1 | 85   | 3  | K.LSDFGLCTGLK.K               |
|   | Hs293FLP_Ti_302.2102.21  | 3.8678 | 0.244  | 1212.73 | 1211.37 | 5175.9 | 1 | 1388.9 | 90   | 4  | K.LSDFGLCTGLK.K               |
|   | HsFLAG-MOCK_300mM_T      | 2.772  | 0.2874 | 1338.65 | 1339.54 | 5388.3 | 1 | 426.2  | 59.1 | 1  | K.LSDFGLCTGLKK.A              |
|   | HsFlag1P_Ti_106.2458.245 | 2.8721 | 0.312  | 1338.78 | 1339.54 | 5464   | 1 | 449.3  | 59.1 | 1  | K.LSDFGLCTGLKK.A              |
|   | HsFlag1P_Ti_106.2456.245 | 3.7584 | 0.3281 | 1339.14 | 1339.54 | 6523.9 | 1 | 1077.5 | 81.8 | 6  | K.LSDFGLCTGLKK.A              |
|   | HsFLAG-MOCK_300mM_T      | 3.1443 | 0.2011 | 1339.66 | 1339.54 | 6422.2 | 1 | 903.1  | 77.3 | 7  | K.LSDFGLCTGLKK.A              |
|   | HsFlag1P_Ti_106.2201.220 | 3.0143 | 0.24   | 1079.47 | 1080.19 | 7686.1 | 3 | 798.5  | 78.6 | 1  | K.AHRTEFYR.N                  |
| * | HsFLAG-MOCK_300mM_T      | 5.0208 | 0.4079 | 2093.81 | 2095.29 | 5022.1 | 1 | 1162   | 67.6 | 4  | R.NLNHSLPSDFTFQNMNSK.R        |
| * | HsFlag1P_Ti_106.2554.255 | 4.9427 | 0.4438 | 2094.2  | 2095.29 | 4451.5 | 1 | 1100.9 | 70.6 | 6  | R.NLNHSLPSDFTFQNMNSK.R        |
| * | HsFLAG-MOCK_150mM_T      | 4.821  | 0.4031 | 2094.66 | 2095.29 | 4434.7 | 1 | 892.7  | 64.7 | 10 | R.NLNHSLPSDFTFQNMNSK.R        |
| * | HsHeLa_Control-MG_Ti_10  | 4.5128 | 0.4003 | 2095.02 | 2095.29 | 3969.5 | 1 | 805.5  | 64.7 | 3  | R.NLNHSLPSDFTFQNMNSK.R        |
| * | HsHeLa_Control-MG_Ti_10  | 4.3607 | 0.3463 | 2095.19 | 2095.29 | 7462.7 | 1 | 1542.5 | 44.1 | 2  | R.NLNHSLPSDFTFQNMNSK.R        |
| * | Hs293FLP-MG_Ti_205.226   | 5.3089 | 0.3427 | 2095.23 | 2095.29 | 7769.5 | 1 | 1316.8 | 41.2 | 1  | R.NLNHSLPSDFTFQNMNSK.R        |
| * | HsFLAG-MOCK_300mM_T      | 5.6252 | 0.3347 | 2095.29 | 2095.29 | 8235   | 1 | 1663.1 | 45.6 | 1  | R.NLNHSLPSDFTFQNMNSK.R        |
| * | HsFLAG-MOCK_150mM_T      | 4.6399 | 0.3646 | 2095.35 | 2095.29 | 9343.2 | 2 | 1342.9 | 41.2 | 1  | R.NLNHSLPSDFTFQNMNSK.R        |
| * | HsFLAG-Control_293_Ti_20 | 5.4474 | 0.4371 | 2095.42 | 2095.29 | 4796.3 | 1 | 1109.2 | 67.6 | 8  | R.NLNHSLPSDFTFQNMNSK.R        |
| * | HsHeLa_Control_Ti_105.27 | 4.1661 | 0.233  | 2095.47 | 2095.29 | 8825.1 | 1 | 1968.7 | 44.1 | 2  | R.NLNHSLPSDFTFQNMNSK.R        |
| * | HsFlag1P_Ti_106.2949.294 | 3.2234 | 0.3182 | 2777.6  | 2779.14 | 5870.1 | 1 | 388.3  | 35.4 | 2  | R.QLAFSTVGTPDYIAPEVFMQTGYNK.L |
| * | HsFlag1P_Ti_106.2950.295 | 4.2259 | 0.3193 | 2778.05 | 2779.14 | 9184   | 1 | 995.6  | 31.2 | 2  | R.QLAFSTVGTPDYIAPEVFMQTGYNK.L |
| * | HsFLAG-Control_293_Ti_20 | 3.3016 | 0.2179 | 2779.57 | 2779.14 | 5518.4 | 1 | 205.4  | 27.1 | 2  | R.QLAFSTVGTPDYIAPEVFMQTGYNK.L |
| * | HsFLAG-Control_293_Ti_20 | 5.1235 | 0.3577 | 2780.83 | 2779.14 | 9865   | 1 | 1762.4 | 35.4 | 1  | R.QLAFSTVGTPDYIAPEVFMQTGYNK.L |
| * | HsFlag1P_Ti_106.2769.276 | 4.2104 | 0.4544 | 2245.51 | 2246.63 | 4918.2 | 1 | 742.5  | 55.6 | 3  | K.VMNWKETLTFPEVPISEK.A        |
| * | HsFLAG-Control_Hela_Ti_1 | 2.4355 | 0.283  | 1586.67 | 1587.81 | 3936.9 | 1 | 292.7  | 53.8 | 5  | K.ETLTFPPEVPISEK.A            |
| * | HsFLAG-Control_HeLa_NE   | 3.6567 | 0.1966 | 1586.7  | 1587.81 | 3340.1 | 1 | 377.8  | 61.5 | 8  | K.ETLTFPPEVPISEK.A            |

|   |                           |        |        |         |         |        |   |        |      |     |                    |
|---|---------------------------|--------|--------|---------|---------|--------|---|--------|------|-----|--------------------|
| * | HsFLAG-MOCK_300mM_T       | 2.5034 | 0.2891 | 1587.48 | 1587.81 | 4148   | 2 | 225.8  | 50   | 1   | K.ETLTFPPEVPISEK.A |
| * | HsFlag1P_Ti_102.2859.285  | 3.7279 | 0.131  | 1587.54 | 1587.81 | 3283.6 | 1 | 453.6  | 65.4 | 4   | K.ETLTFPPEVPISEK.A |
| * | HsFLAG-Control_HeLa_NE    | 2.4856 | 0.1175 | 1587.65 | 1587.81 | 4488.8 | 4 | 245.4  | 46.2 | 2   | K.ETLTFPPEVPISEK.A |
| * | HsHeLa-FLAG-IP_S100_Ti    | 3.6116 | 0.1325 | 1588.07 | 1587.81 | 3437.3 | 2 | 435.1  | 65.4 | 111 | K.ETLTFPPEVPISEK.A |
| * | HsFLAG-Control_293_Ti_20  | 3.6365 | 0.2172 | 1588.25 | 1587.81 | 3828.4 | 1 | 663.4  | 73.1 | 21  | K.ETLTFPPEVPISEK.A |
| * | HsFLAG-Control_293_Ti_20  | 2.0557 | 0.1367 | 1223.42 | 1224.25 | 7285.9 | 4 | 370.4  | 64.3 | 1   | R.FCCEWEHR.I       |
| * | HsFLAG-Control_293_Ti_20  | 2.8071 | 0.1854 | 1225.25 | 1224.25 | 5488.4 | 1 | 947.6  | 92.9 | 4   | R.FCCEWEHR.I       |
| * | HsFLAG-MOCK_300mM_T       | 3.0809 | 0.2383 | 1226.81 | 1224.25 | 5239.4 | 1 | 977.3  | 92.9 | 14  | R.FCCEWEHR.I       |
| * | HsFLAG-Control_HeLa_Ti_1  | 2.3225 | 0.2183 | 1012.39 | 1013.18 | 4619   | 1 | 519.1  | 66.7 | 1   | R.IGAPGVVEIK.S     |
| * | HsF-IP-293-MG_Ti_102.154  | 1.8868 | 0.1867 | 1012.4  | 1013.18 | 4550.1 | 2 | 427.6  | 61.1 | 1   | R.IGAPGVVEIK.S     |
| * | HsFLAG-Control_HeLa_S10   | 2.0988 | 0.1736 | 1012.42 | 1013.18 | 5624.9 | 3 | 427.1  | 61.1 | 1   | R.IGAPGVVEIK.S     |
| * | HsFLAG-Control_293_Ti_20  | 2.3254 | 0.1615 | 1012.44 | 1013.18 | 5051.2 | 1 | 632.6  | 72.2 | 2   | R.IGAPGVVEIK.S     |
| * | HsFLAG-MOCK_300mM_T       | 1.9512 | 0.176  | 1012.44 | 1013.18 | 4680.4 | 1 | 505    | 66.7 | 1   | R.IGAPGVVEIK.S     |
| * | HsFLAG-Control_HeLa_NE    | 2.0855 | 0.1684 | 1012.45 | 1013.18 | 5219.8 | 1 | 651.6  | 72.2 | 3   | R.IGAPGVVEIK.S     |
| * | HsF-IP-293_Ti_103.1481.14 | 2.0787 | 0.1626 | 1012.46 | 1013.18 | 4576.2 | 1 | 514.1  | 66.7 | 1   | R.IGAPGVVEIK.S     |
| * | HsFLAG-Control_HeLa_S10   | 2.2144 | 0.1625 | 1012.48 | 1013.18 | 4236.2 | 9 | 350    | 55.6 | 1   | R.IGAPGVVEIK.S     |
| * | HsFLAG-Control_HeLa_S10   | 2.5374 | 0.2182 | 1012.48 | 1013.18 | 4482   | 1 | 480.7  | 66.7 | 1   | R.IGAPGVVEIK.S     |
| * | Hs293FLP-MG_Ti_302.140    | 2.0867 | 0.1935 | 1012.49 | 1013.18 | 4457.5 | 7 | 349.7  | 55.6 | 1   | R.IGAPGVVEIK.S     |
| * | HsFLAG-Control_HeLa_NE    | 2.4087 | 0.1421 | 1012.49 | 1013.18 | 4878.2 | 1 | 511.8  | 66.7 | 2   | R.IGAPGVVEIK.S     |
| * | HsHeLa-FLAG-IP_S100_Ti    | 1.8813 | 0.1292 | 1012.51 | 1013.18 | 3880.4 | 1 | 376.5  | 61.1 | 1   | R.IGAPGVVEIK.S     |
| * | HsFLAG-Control_MG_293_    | 2.2337 | 0.1937 | 1012.54 | 1013.18 | 4767.6 | 1 | 492.8  | 66.7 | 2   | R.IGAPGVVEIK.S     |
| * | HsFLAG-Control_HeLa_NE    | 2.2722 | 0.2151 | 1012.56 | 1013.18 | 4103.6 | 8 | 398.4  | 61.1 | 2   | R.IGAPGVVEIK.S     |
| * | HsFLAG-Control_HeLa_S10   | 2.5211 | 0.2113 | 1012.56 | 1013.18 | 5112.3 | 2 | 456.4  | 61.1 | 2   | R.IGAPGVVEIK.S     |
| * | HsHelaFlag1P_Ti_102.1527  | 2.2821 | 0.2326 | 1012.63 | 1013.18 | 3927.9 | 1 | 449.7  | 61.1 | 2   | R.IGAPGVVEIK.S     |
| * | HsFLAG-Control_HeLa_NE    | 2.4581 | 0.1755 | 1012.71 | 1013.18 | 5184.8 | 1 | 429.8  | 61.1 | 1   | R.IGAPGVVEIK.S     |
| * | Hs283FLP_Ti_102.1517.15   | 2.3896 | 0.2159 | 1012.74 | 1013.18 | 4582.6 | 1 | 507.4  | 66.7 | 1   | R.IGAPGVVEIK.S     |
| * | HsFLAG-MOCK_150mM_T       | 3.3017 | 0.3097 | 1013.11 | 1013.18 | 3291.3 | 1 | 953.8  | 94.4 | 5   | R.IGAPGVVEIK.S     |
| * | HsFLAG-Control_HeLa_NE    | 3.3913 | 0.299  | 1013.22 | 1013.18 | 3885.4 | 1 | 942.2  | 88.9 | 4   | R.IGAPGVVEIK.S     |
| * | HsFLAG-Control_HeLa_S10   | 3.2374 | 0.272  | 1013.24 | 1013.18 | 4099.3 | 1 | 906.8  | 88.9 | 3   | R.IGAPGVVEIK.S     |
| * | HsFLAG-Control_293_Ti_20  | 3.2737 | 0.3126 | 1013.27 | 1013.18 | 4114.8 | 1 | 1114.5 | 94.4 | 2   | R.IGAPGVVEIK.S     |
| * | Hs293FLP_TREX_Ti_102.1    | 3.3545 | 0.331  | 1013.29 | 1013.18 | 3234.2 | 1 | 919.9  | 94.4 | 3   | R.IGAPGVVEIK.S     |
| * | HsFLAG-Control_HeLa_NE    | 3.2549 | 0.3165 | 1013.3  | 1013.18 | 4312   | 1 | 961.2  | 88.9 | 2   | R.IGAPGVVEIK.S     |
| * | HsFLAG-Control_MG_293_    | 3.4436 | 0.3071 | 1013.32 | 1013.18 | 3937.6 | 1 | 813.8  | 83.3 | 1   | R.IGAPGVVEIK.S     |
| * | HsF-IP-293_Ti_103.1480.14 | 3.2435 | 0.2673 | 1013.32 | 1013.18 | 3051.8 | 1 | 916.3  | 94.4 | 3   | R.IGAPGVVEIK.S     |
| * | HsFLAG-Control_HeLa_Ti_1  | 3.3428 | 0.2726 | 1013.35 | 1013.18 | 3331.3 | 1 | 743.7  | 83.3 | 2   | R.IGAPGVVEIK.S     |
| * | HsFLAG-MOCK_300mM_T       | 3.5317 | 0.2917 | 1013.35 | 1013.18 | 3439.3 | 1 | 954.9  | 94.4 | 4   | R.IGAPGVVEIK.S     |
| * | HsHeLa-FLAG-IP_S100_Ti    | 3.3198 | 0.2995 | 1013.36 | 1013.18 | 3303.7 | 1 | 835.6  | 88.9 | 14  | R.IGAPGVVEIK.S     |
| * | HsHelaFlag1P_Ti_102.1531  | 2.8178 | 0.3099 | 1013.43 | 1013.18 | 2897.8 | 1 | 646.8  | 83.3 | 2   | R.IGAPGVVEIK.S     |
| * | HsFLAG-Control_HeLa_S10   | 3.072  | 0.2911 | 1013.43 | 1013.18 | 4136.9 | 1 | 740.5  | 83.3 | 2   | R.IGAPGVVEIK.S     |
| * | HsFLAG-Control_HeLa_NE    | 3.5715 | 0.2865 | 1013.47 | 1013.18 | 4057.1 | 1 | 1084.9 | 94.4 | 23  | R.IGAPGVVEIK.S     |
| * | HsFLAG-Control_HeLa_NE    | 3.2599 | 0.234  | 1013.67 | 1013.18 | 4009.3 | 1 | 916.2  | 88.9 | 2   | R.IGAPGVVEIK.S     |
| * | HsFLAG-Control_HeLa_S10   | 3.3693 | 0.3001 | 1014.49 | 1013.18 | 4368.1 | 1 | 890.7  | 88.9 | 2   | R.IGAPGVVEIK.S     |
| * | HsF-IP-293-MG_Ti_102.154  | 3.235  | 0.3032 | 1014.57 | 1013.18 | 3017   | 1 | 777.1  | 88.9 | 2   | R.IGAPGVVEIK.S     |
| * | HsFLAG-Control_HeLa_NE    | 3.6024 | 0.2732 | 1723.44 | 1723.84 | 5149.2 | 1 | 792.3  | 46.2 | 1   | K.SNSFFEGVDWEHIR.E |
| * | HsFlag1P_Ti_103.3074.307  | 4.517  | 0.4319 | 1723.48 | 1723.84 | 6566.9 | 1 | 1642   | 80.8 | 51  | K.SNSFFEGVDWEHIR.E |
| * | HsFLAG-Control_HeLa_S10   | 4.2447 | 0.4356 | 1723.61 | 1723.84 | 7136.3 | 1 | 1528.6 | 76.9 | 7   | K.SNSFFEGVDWEHIR.E |
| * | HsFLAG-MOCK_300mM_T       | 4.3497 | 0.4512 | 1723.75 | 1723.84 | 6862.8 | 1 | 1515.4 | 76.9 | 44  | K.SNSFFEGVDWEHIR.E |
| * | HsFLAG-Control_HeLa_S10   | 3.5274 | 0.3246 | 1723.86 | 1723.84 | 5442.8 | 1 | 821.6  | 46.2 | 1   | K.SNSFFEGVDWEHIR.E |
| * | HsFLAG-Control_HeLa_S10   | 4.3004 | 0.3587 | 1724.07 | 1723.84 | 6615.4 | 1 | 1144.9 | 73.1 | 10  | K.SNSFFEGVDWEHIR.E |

|                   |                          |        |        |         |         |         |   |        |      |     |                                          |
|-------------------|--------------------------|--------|--------|---------|---------|---------|---|--------|------|-----|------------------------------------------|
| *                 | HsFLAG-Control_HeLa_S1(  | 3.5031 | 0.2014 | 1724.8  | 1723.84 | 6102    | 2 | 723.6  | 42.3 | 1   | K.SNSFFEGVDWEHIR.E                       |
| *                 | HsFlag1P_Ti_105.2022.202 | 2.3156 | 0.1725 | 1226.58 | 1227.45 | 2922.3  | 1 | 282.2  | 65   | 1   | R.ERPAAISIEIK.S                          |
| *                 | HsFLAG-Control_HeLa_S1(  | 2.2275 | 0.1785 | 1226.63 | 1227.45 | 3366.2  | 1 | 368.5  | 70   | 1   | R.ERPAAISIEIK.S                          |
| *                 | HsFLAG-Control_HeLa_NE   | 2.4001 | 0.205  | 1226.64 | 1227.45 | 3912.9  | 8 | 297.3  | 60   | 2   | R.ERPAAISIEIK.S                          |
| *                 | HsFLAG-MOCK_300mM_T      | 2.3409 | 0.1904 | 1226.7  | 1227.45 | 2954.1  | 1 | 337.5  | 70   | 2   | R.ERPAAISIEIK.S                          |
| *                 | HsFLAG-Control_HeLa_S1(  | 3.1836 | 0.1437 | 1227.47 | 1227.45 | 5644.3  | 4 | 836    | 80   | 6   | R.ERPAAISIEIK.S                          |
| *                 | HsFLAG-Control_HeLa_NE   | 3.404  | 0.1655 | 1227.64 | 1227.45 | 5847.1  | 4 | 789.7  | 75   | 4   | R.ERPAAISIEIK.S                          |
| *                 | HsFLAG-Control_HeLa_NE   | 2.9378 | 0.1563 | 1227.7  | 1227.45 | 3398.1  | 1 | 365.6  | 70   | 1   | R.ERPAAISIEIK.S                          |
| *                 | HsFLAG-MOCK_150mM_T      | 3.3454 | 0.1913 | 1227.83 | 1227.45 | 4908.3  | 7 | 723.2  | 75   | 6   | R.ERPAAISIEIK.S                          |
| *                 | HsFlag1P_Ti_105.2021.202 | 3.0319 | 0.1382 | 1228.65 | 1227.45 | 5303.5  | 3 | 763.6  | 80   | 5   | R.ERPAAISIEIK.S                          |
| *                 | Hs283FLP_Ti_104.1552.15  | 3.0893 | 0.1368 | 1228.72 | 1227.45 | 4596.8  | 5 | 734.3  | 80   | 17  | R.ERPAAISIEIK.S                          |
| *                 | HsFLAG-Control_HeLa_NE   | 3.1797 | 0.3476 | 2072.48 | 2073.17 | 7106.4  | 5 | 357.9  | 38.2 | 1   | K.SIDDTSNFDEFPESEDILK.P                  |
| *                 | HsFLAG-Control_293_Ti_2( | 6.0631 | 0.4272 | 3613.27 | 3614.81 | 9910.5  | 1 | 1346.4 | 28.2 | 196 | K.SIDDTSNFDEFPESEDILKPTVATSNHPETDYK.N    |
| *                 | HsFlag1P_Ti_103.2789.278 | 5.6454 | 0.4279 | 3855.47 | 3857.09 | 10749.3 | 1 | 1649.2 | 27.3 | 3   | K.SIDDTSNFDEFPESEDILKPTVATSNHPETDYK.NK.D |
| *                 | HsFLAG-MOCK_300mM_T      | 4.518  | 0.2905 | 1590.76 | 1591.81 | 5924.4  | 1 | 1335.9 | 81.8 | 30  | K.NKDWWVFINYTYK.R                        |
| *                 | HsFLAG-Control_HeLa_NE   | 1.9742 | 0.1527 | 949.47  | 950.085 | 2705.8  | 4 | 271    | 71.4 | 1   | K.RFEGLTAR.G                             |
| *                 | HsFLAG-Control_HeLa_NE   | 3.3945 | 0.2032 | 950.31  | 950.085 | 8107.4  | 3 | 1154.5 | 92.9 | 7   | K.RFEGLTAR.G                             |
| *                 | HsHeLa_Control-MG_Ti_10  | 3.5432 | 0.1908 | 950.77  | 950.085 | 7704.4  | 1 | 1521.3 | 100  | 35  | K.RFEGLTAR.G                             |
| gi 4757756 ref NF | 26                       | 85     | 0.684  | 339     | 38604   | 7.8 U   |   |        |      |     | annexin A2 isoform 2 [Homo sapiens]      |
| gi 50845388 ref N | 26                       | 85     | 0.65   | 357     | 40411   | 8.4 U   |   |        |      |     | annexin A2 isoform 1 [Homo sapiens]      |
| gi 50845386 ref N | 26                       | 85     | 0.684  | 339     | 38604   | 7.8 U   |   |        |      |     | annexin A2 isoform 2 [Homo sapiens]      |
|                   | HsFLAG-MOCK_300mM_T      | 4.268  | 0.4276 | 1845.98 | 1846    | 3638.2  | 1 | 578.7  | 55.9 | 5   | K.LSLEGDHSTPPSAYGSVK.A                   |
|                   | HsFLAG-MOCK_300mM_T      | 4.2043 | 0.3048 | 2155.9  | 2156.36 | 8075.5  | 1 | 1062.5 | 50   | 11  | K.AYTNFDAERDALNIETAIK.T                  |
|                   | HsHeLa3_Ti_104.3283.328  | 4.825  | 0.3095 | 1543.18 | 1543.76 | 8832.7  | 1 | 2037.6 | 76.9 | 13  | K.GVDEVTIVNILTNR.S                       |
|                   | HsHeLa3_Ti_105.3252.325  | 2.433  | 0.3352 | 1543.78 | 1543.76 | 4183.5  | 1 | 350.4  | 57.7 | 1   | K.GVDEVTIVNILTNR.S                       |
|                   | HsFLAG-MOCK_300mM_T      | 4.5115 | 0.3113 | 1669.25 | 1668.81 | 5713.7  | 1 | 1014.8 | 65.4 | 2   | R.SNAQRQDIAFAYQR.R                       |
|                   | HsHeLa_Control-MG_Ti_20  | 4.4167 | 0.4638 | 1651.48 | 1651.99 | 7356.8  | 1 | 1398.8 | 70   | 1   | K.SALSGHLETVILGLLK.T                     |
|                   | HsHeLa3_Ti_106.3094.309  | 5.3085 | 0.3059 | 1652.2  | 1651.99 | 7224.2  | 1 | 1505.9 | 66.7 | 2   | K.SALSGHLETVILGLLK.T                     |
|                   | HsFLAG-MOCK_300mM_T      | 5.2665 | 0.3729 | 1653.51 | 1651.99 | 6072.3  | 1 | 1291.4 | 66.7 | 4   | K.SALSGHLETVILGLLK.T                     |
|                   | HsFLAG-MOCK_300mM_T      | 3.7196 | 0.2901 | 1653.62 | 1651.99 | 4379.5  | 4 | 647.2  | 45   | 1   | K.SALSGHLETVILGLLK.T                     |
|                   | HsHeLa3_Ti_106.3103.310  | 3.6224 | 0.2925 | 1654.15 | 1651.99 | 4328.2  | 2 | 705.3  | 43.3 | 1   | K.SALSGHLETVILGLLK.T                     |
|                   | HsHeLa3_Ti_102.1502.150  | 2.8318 | 0.2667 | 1222.62 | 1223.33 | 4581.5  | 2 | 346.8  | 65   | 2   | K.TPAQYDASELK.A                          |
|                   | HsHeLa3_Ti_102.1507.150  | 3.743  | 0.2367 | 1223.64 | 1223.33 | 4641.9  | 1 | 997.9  | 85   | 1   | K.TPAQYDASELK.A                          |
|                   | HsHeLa3_Ti_103.3348.335  | 4.5892 | 0.3586 | 1779.68 | 1778.92 | 8304.4  | 1 | 1140.3 | 56.7 | 13  | K.GLGTDEDSLIEIICSR.T                     |
|                   | HsHeLa3_Ti_103.1402.140  | 3.7777 | 0.1216 | 1246.49 | 1245.34 | 5277.9  | 8 | 873.8  | 83.3 | 2   | R.TNQELQEINR.V                           |
|                   | HsHeLa3_Ti_103.1787.178  | 2.6367 | 0.2559 | 1355.51 | 1354.46 | 5327.2  | 1 | 886.9  | 72.7 | 1   | K.DIIDTSGDFRK.L                          |
|                   | HsGST-MOCK_Ti_102.183    | 4.0785 | 0.3124 | 2066.51 | 2066.19 | 6064    | 1 | 801.8  | 55.9 | 1   | R.RAEDGVIDYELIDQDAR.D                    |
|                   | HsGST-MOCK_Ti_302.244    | 4.3545 | 0.2487 | 1909.12 | 1910    | 5571.9  | 1 | 943.8  | 65.6 | 6   | R.AEDGVIDYELIDQDAR.D                     |
|                   | HsHeLa3_Ti_102.1538.153  | 1.8449 | 0.1443 | 880.77  | 880.973 | 5062.1  | 9 | 550.8  | 71.4 | 1   | R.DLYDAGVK.R                             |
|                   | HsHeLa3_Ti_103.2136.213  | 2.5317 | 0.0893 | 1037.22 | 1036.23 | 3553.3  | 4 | 488.6  | 78.6 | 1   | K.WISIMTER.S                             |
|                   | HsHeLa3_Ti_103.2923.292  | 3.4501 | 0.2687 | 1463    | 1461.63 | 5905.1  | 1 | 1002.5 | 77.3 | 3   | K.SYSPYDMLIESIR.K                        |
|                   | HsGST-MOCK_Ti_403.483    | 5.0793 | 0.3331 | 1977.98 | 1977.19 | 8364.7  | 1 | 1635.2 | 65.6 | 6   | K.GDLENAFLNLVQCQCNK.P                    |
|                   | HsGST-MOCK_Ti_103.441    | 3.5664 | 0.1119 | 3577.16 | 3578.04 | 7791.8  | 1 | 499.7  | 23.3 | 1   | K.GDLENAFLNLVQCQCNKPLYFADRLYDSMK.G       |
|                   | HsHeLa3_Ti_103.2026.202  | 2.6086 | 0.286  | 1421.61 | 1422.58 | 5420.1  | 1 | 626.2  | 70   | 2   | K.SLYYYIQDQTK.G                          |
|                   | HsHeLa3_Ti_103.2027.202  | 4.2236 | 0.2887 | 1424.6  | 1422.58 | 7304.7  | 1 | 1586.8 | 85   | 2   | K.SLYYYIQDQTK.G                          |
|                   | HsFLAG-MOCK_300mM_T      | 2.8202 | 0.3575 | 2014.53 | 2014.2  | 5215.9  | 1 | 535.8  | 60   | 1   | K.SLYYYIQDQTKGDYQK.A                     |
|                   | HsHeLa3_Ti_102.2329.232  | 1.9477 | 0.2948 | 1096.47 | 1097.18 | 6430.5  | 3 | 617.9  | 61.1 | 1   | K.ALLYLCCGGDD.-                          |
| gi 13699824 ref N | 236                      | 1845   | 0.671  | 1056    | 119159  | 5.6 U   |   |        |      |     | kinesin family member 11 [Homo sapiens]  |
| *                 | Hs293FLP_Ti_306.2367.23  | 2.7675 | 0.1956 | 1164.66 | 1163.29 | 4415.4  | 7 | 476.6  | 75   | 8   | R.CRPFLAER.K                             |

|   |                          |        |        |         |         |         |   |        |      |                                    |
|---|--------------------------|--------|--------|---------|---------|---------|---|--------|------|------------------------------------|
| * | HsHeLa_Control-MG_Ti_20  | 4.2132 | 0.3683 | 1570.69 | 1569.72 | 4993.6  | 1 | 940.3  | 73.1 | 2 R.KASAHSIVECDPVR.K               |
| * | HsFLAG-Control_293_Ti_20 | 3.048  | 0.3599 | 1440.3  | 1441.55 | 6141.6  | 1 | 430.8  | 54.2 | 2 K.ASAHSIVECDPVR.K                |
| * | HsFLAG-Control_293_Ti_20 | 4.0562 | 0.3892 | 1441    | 1441.55 | 8686    | 1 | 1467.3 | 70.8 | 8 K.ASAHSIVECDPVR.K                |
| * | Hs293FLP_Ti_303.1390.13  | 3.9637 | 0.4261 | 1441.87 | 1441.55 | 7211.3  | 1 | 1125.6 | 66.7 | 4 K.ASAHSIVECDPVR.K                |
| * | HsHeLa_Control-MG_Ti_20  | 3.7186 | 0.3774 | 1569.42 | 1569.72 | 7537.4  | 1 | 906.7  | 61.5 | 19 K.ASAHSIVECDPVRK.E              |
| * | Hs293FLP_Ti_304.1395.13  | 3.5406 | 0.3469 | 1570.28 | 1569.72 | 5882.6  | 1 | 738.9  | 42.3 | 1 K.ASAHSIVECDPVRK.E               |
| * | Hs293FLP-MG_Ti_105.141   | 3.6323 | 0.2996 | 1570.45 | 1569.72 | 5713    | 1 | 884.7  | 65.4 | 28 K.ASAHSIVECDPVRK.E              |
| * | HsF-IP-293_Ti_206.2508.2 | 3.7693 | 0.3706 | 1468.6  | 1468.66 | 5843.3  | 1 | 927.6  | 75   | 13 K.TYTFDMVFGASTK.Q               |
| * | Hs293FLP-MG_Ti_203.493   | 4.3549 | 0.5216 | 3094.99 | 3095.47 | 8627.9  | 1 | 1052.2 | 40.7 | 2 R.SVVCILDEVIMGYNCTIFAYGQTGTGK.T  |
| * | HsF-IP-293-MG_Ti_106.28  | 3.8623 | 0.2042 | 3095.09 | 3095.47 | 9849.1  | 3 | 520.4  | 22.2 | 1 R.SVVCILDEVIMGYNCTIFAYGQTGTGK.T  |
| * | Hs293FLP-MG_Ti_204.459   | 5.9418 | 0.4457 | 3096.02 | 3095.47 | 10407.3 | 1 | 2080   | 32.4 | 6 R.SVVCILDEVIMGYNCTIFAYGQTGTGK.T  |
| * | HsFLAG-MOCK_300mM_T      | 3.969  | 0.3191 | 3169.22 | 3169.45 | 7275.8  | 1 | 851.8  | 29.8 | 3 K.TFTMEGERSPNEEYTWEEEDPLAGIIPR.T |
| * | HsFLAG-Control_293_Ti_20 | 4.0082 | 0.38   | 2216.26 | 2217.4  | 8365.8  | 1 | 1473   | 38.9 | 4 R.SPNEEYTWEEEDPLAGIIPR.T         |
| * | HsHeLa_Control-MG_Ti_20  | 4.5917 | 0.29   | 2217.56 | 2217.4  | 7651.2  | 1 | 1477.9 | 41.7 | 1 R.SPNEEYTWEEEDPLAGIIPR.T         |
| * | HsFLAG-Control_293_Ti_20 | 6.1181 | 0.4799 | 2217.85 | 2217.4  | 7752.3  | 1 | 2042.4 | 69.4 | 92 R.SPNEEYTWEEEDPLAGIIPR.T        |
| * | HsHeLa_Control-MG_Ti_20  | 5.7373 | 0.4912 | 2218.12 | 2217.4  | 8885.8  | 1 | 2058.9 | 66.7 | 23 R.SPNEEYTWEEEDPLAGIIPR.T        |
| * | HsF-IP-293-MG_Ti_102.33  | 5.5157 | 0.4774 | 2219.72 | 2217.4  | 8897.4  | 1 | 1457.9 | 58.3 | 26 R.SPNEEYTWEEEDPLAGIIPR.T        |
| * | HsFLAG-Control_293_Ti_20 | 2.199  | 0.1448 | 1015.42 | 1016.19 | 4753.3  | 6 | 494    | 71.4 | 2 R.TLHQIFEK.L                     |
| * | HsFLAG-Control_MG_293    | 2.1243 | 0.1608 | 1015.47 | 1016.19 | 4995    | 2 | 400.5  | 64.3 | 1 R.TLHQIFEK.L                     |
| * | Hs293FLP-MG_Ti_205.164   | 2.1995 | 0.1159 | 1015.49 | 1016.19 | 5937.6  | 3 | 524.6  | 71.4 | 1 R.TLHQIFEK.L                     |
| * | Hs283FLP_Ti_105.1401.14  | 1.8289 | 0.1237 | 1015.52 | 1016.19 | 5187.7  | 9 | 436.3  | 64.3 | 1 R.TLHQIFEK.L                     |
| * | HsF-IP-293-MG_Ti_104.15  | 2.095  | 0.1216 | 1015.52 | 1016.19 | 5008.8  | 3 | 422.3  | 64.3 | 2 R.TLHQIFEK.L                     |
| * | Hs293FLP_Ti_305.1501.15  | 2.2159 | 0.1357 | 1015.63 | 1016.19 | 4792.3  | 6 | 498.4  | 71.4 | 3 R.TLHQIFEK.L                     |
| * | HsHeLa_Control_Ti_106.27 | 2.19   | 0.1693 | 1015.89 | 1016.19 | 4875    | 7 | 489.6  | 71.4 | 1 R.TLHQIFEK.L                     |
| * | HsFLAG-Control_MG_293    | 2.5715 | 0.1225 | 1016.21 | 1016.19 | 4660.5  | 3 | 528.9  | 85.7 | 1 R.TLHQIFEK.L                     |
| * | Hs293FLP-MG_Ti_205.164   | 3.0191 | 0.1368 | 1016.27 | 1016.19 | 3644.6  | 1 | 567.5  | 92.9 | 1 R.TLHQIFEK.L                     |
| * | HsFLAG-Control_293_Ti_20 | 2.8404 | 0.1358 | 1016.3  | 1016.19 | 4983.7  | 1 | 575.9  | 85.7 | 1 R.TLHQIFEK.L                     |
| * | Hs283FLP_Ti_105.1409.14  | 2.8789 | 0.0892 | 1016.4  | 1016.19 | 4680    | 1 | 693.5  | 92.9 | 4 R.TLHQIFEK.L                     |
| * | HsF-IP-293-MG_Ti_104.15  | 2.8206 | 0.1396 | 1016.4  | 1016.19 | 4000.5  | 3 | 568.6  | 85.7 | 2 R.TLHQIFEK.L                     |
| * | HsFLAG-Control_HeLa_S10  | 2.8715 | 0.132  | 1016.53 | 1016.19 | 5211.7  | 2 | 727.9  | 92.9 | 9 R.TLHQIFEK.L                     |
| * | Hs293FLP_Ti_305.1502.15  | 2.6175 | 0.0845 | 1016.66 | 1016.19 | 4111.5  | 1 | 641.4  | 92.9 | 2 R.TLHQIFEK.L                     |
| * | HsFLAG-Control_293_Ti_20 | 2.3788 | 0.1652 | 1210.42 | 1211.31 | 5462.4  | 3 | 436.9  | 65   | 1 K.LTDNGTEFSVK.V                  |
| * | Hs293FLP-MG_Ti_202.188   | 2.1966 | 0.1928 | 1210.46 | 1211.31 | 6912.1  | 1 | 619    | 65   | 1 K.LTDNGTEFSVK.V                  |
| * | HsHeLa_Control_Ti_102.15 | 2.0332 | 0.1718 | 1210.6  | 1211.31 | 5608.1  | 1 | 428.4  | 60   | 1 K.LTDNGTEFSVK.V                  |
| * | HsFLAG-Control_MG_293    | 3.5267 | 0.1806 | 1210.87 | 1211.31 | 6064.9  | 5 | 829.9  | 75   | 2 K.LTDNGTEFSVK.V                  |
| * | HsFLAG-MOCK_300mM_T      | 3.2455 | 0.2909 | 1211.21 | 1211.31 | 5869.5  | 3 | 744.1  | 75   | 6 K.LTDNGTEFSVK.V                  |
| * | HsFLAG-Control_293_Ti_20 | 2.868  | 0.2528 | 1211.3  | 1211.31 | 6138    | 2 | 775.7  | 75   | 1 K.LTDNGTEFSVK.V                  |
| * | Hs283FLP_Ti_104.3965.39  | 3.998  | 0.1565 | 2781.87 | 2783.06 | 6293.1  | 6 | 476.5  | 27.2 | 4 K.VSLLEIYNEELFDLLNPSSDVSER.L     |
| * | HsHeLa_Control-MG_Ti_20  | 4.7897 | 0.2829 | 2782.59 | 2783.06 | 6874.6  | 2 | 880.4  | 45.7 | 18 K.VSLLEIYNEELFDLLNPSSDVSER.L    |
| * | HsFLAG-Control_HeLa_NE   | 3.8435 | 0.2578 | 2782.61 | 2783.06 | 8326.5  | 1 | 970.3  | 31.5 | 1 K.VSLLEIYNEELFDLLNPSSDVSER.L     |
| * | HsF-IP-293-MG_Ti_104.02  | 5.3498 | 0.3256 | 2782.96 | 2783.06 | 7800.1  | 1 | 1019.8 | 45.7 | 37 K.VSLLEIYNEELFDLLNPSSDVSER.L    |
| * | HsFLAG-Control_293_Ti_20 | 4.9199 | 0.3587 | 2783.09 | 2783.06 | 7200.8  | 1 | 1341.8 | 52.2 | 21 K.VSLLEIYNEELFDLLNPSSDVSER.L    |
| * | HsFLAG-Control_HeLa_S10  | 4.9425 | 0.2776 | 2783.21 | 2783.06 | 8529.8  | 3 | 940.9  | 43.5 | 7 K.VSLLEIYNEELFDLLNPSSDVSER.L     |
| * | HsFLAG-Control_HeLa_S10  | 4.4185 | 0.2831 | 2783.22 | 2783.06 | 7808.2  | 1 | 993.5  | 33.7 | 1 K.VSLLEIYNEELFDLLNPSSDVSER.L     |
| * | HsFLAG-MOCK_300mM_T      | 4.2828 | 0.2295 | 2783.37 | 2783.06 | 6442.5  | 1 | 751.7  | 43.5 | 8 K.VSLLEIYNEELFDLLNPSSDVSER.L     |
| * | HsHeLa_Control_Ti_102.48 | 5.1409 | 0.2741 | 2783.54 | 2783.06 | 7440    | 2 | 941.8  | 45.7 | 13 K.VSLLEIYNEELFDLLNPSSDVSER.L    |
| * | Hs293FLP-MG_Ti_204.492   | 5.0737 | 0.1861 | 2783.59 | 2783.06 | 8484.2  | 1 | 1192.6 | 32.6 | 3 K.VSLLEIYNEELFDLLNPSSDVSER.L     |
| * | HsFLAG-Control_293_Ti_20 | 5.4965 | 0.316  | 2784.33 | 2783.06 | 7360.8  | 1 | 1216.7 | 37   | 1 K.VSLLEIYNEELFDLLNPSSDVSER.L     |
| * | HsHeLa_Control-MG_Ti_10  | 3.7501 | 0.1935 | 2785.3  | 2783.06 | 6170.2  | 1 | 693.9  | 30.4 | 1 K.VSLLEIYNEELFDLLNPSSDVSER.L     |

|   |                           |        |        |         |         |        |   |        |      |    |                               |
|---|---------------------------|--------|--------|---------|---------|--------|---|--------|------|----|-------------------------------|
| * | HsFLAG-Control_293_Ti_20  | 3.0711 | 0.2175 | 1021.95 | 1022.16 | 3919   | 8 | 601    | 78.6 | 4  | R.LQMFD DPR.N                 |
| * | Hs293FLP-MG_Ti_204.262    | 5.0064 | 0.4074 | 2257.73 | 2258.53 | 7340.7 | 1 | 840.9  | 50   | 12 | K.GLEEITVHNKDEVYQILEK.G       |
| * | HsHeLa_Control-MG_Ti_20   | 5.1385 | 0.3859 | 2257.75 | 2258.53 | 7844   | 1 | 1294.2 | 58.3 | 6  | K.GLEEITVHNKDEVYQILEK.G       |
| * | HsFlag1P_Ti_103.2885.288  | 4.5502 | 0.3522 | 2257.87 | 2258.53 | 9411.4 | 1 | 1419.6 | 55.6 | 4  | K.GLEEITVHNKDEVYQILEK.G       |
| * | Hs293FLP-MG_Ti_203.282    | 4.829  | 0.4223 | 2258.55 | 2258.53 | 7527.3 | 1 | 1513.7 | 44.4 | 6  | K.GLEEITVHNKDEVYQILEK.G       |
| * | HsHeLa_Control-MG_Ti_10   | 4.9557 | 0.3975 | 2259.04 | 2258.53 | 6575.3 | 1 | 1159.6 | 58.3 | 1  | K.GLEEITVHNKDEVYQILEK.G       |
| * | HsHeLa_Control_Ti_105.30  | 4.8122 | 0.3953 | 2259.54 | 2258.53 | 8398.4 | 1 | 1103.5 | 36.1 | 2  | K.GLEEITVHNKDEVYQILEK.G       |
| * | HsHeLa_Control-MG_Ti_20   | 5.2707 | 0.4211 | 2259.54 | 2258.53 | 9390.7 | 1 | 1952.8 | 44.4 | 6  | K.GLEEITVHNKDEVYQILEK.G       |
| * | HsHeLa_Control-MG_Ti_10   | 4.2296 | 0.3014 | 2260.58 | 2258.53 | 8036.8 | 1 | 1568.6 | 43.1 | 2  | K.GLEEITVHNKDEVYQILEK.G       |
| * | HsF-IP-293_Ti_102.1728.17 | 3.0289 | 0.131  | 1137.23 | 1137.28 | 4654.8 | 4 | 899.2  | 81.2 | 2  | K.DEVYQILEK.G                 |
| * | HsF-IP-293-MG_Ti_106.209  | 4.8698 | 0.4607 | 1543.29 | 1543.74 | 6117.7 | 1 | 1207.9 | 76.9 | 11 | K.RTTAATLMNAYSSR.S            |
| * | HsFLAG-Control_293_Ti_20  | 2.4052 | 0.1818 | 1386.47 | 1387.55 | 3249.4 | 6 | 121.8  | 50   | 1  | R.TTAATLMNAYSSR.S             |
| * | HsFLAG-Control_293_Ti_20  | 4.2331 | 0.3317 | 1386.94 | 1387.55 | 6643.6 | 1 | 1296.5 | 79.2 | 6  | R.TTAATLMNAYSSR.S             |
| * | HsFlag1P_Ti_103.2197.219  | 4.2961 | 0.332  | 1387.02 | 1387.55 | 8275.5 | 1 | 1756.2 | 83.3 | 6  | R.TTAATLMNAYSSR.S             |
| * | HsFlag1P_Ti_106.2633.263  | 5.5472 | 0.4145 | 1770    | 1770.04 | 7819.9 | 1 | 2545.5 | 78.1 | 2  | K.IGKLNLDLAGSENIGR.S          |
| * | HsHeLa_Control-MG_Ti_20   | 2.1568 | 0.2076 | 1470.51 | 1471.65 | 3120.7 | 2 | 189.7  | 50   | 1  | K.LNLVDLAGSENIGR.S            |
| * | HsFLAG-Control_293_Ti_20  | 2.9849 | 0.0972 | 1470.62 | 1471.65 | 3824.2 | 1 | 318.7  | 57.7 | 1  | K.LNLVDLAGSENIGR.S            |
| * | HsFLAG-Control_HeLa_NE    | 5.1959 | 0.219  | 1470.62 | 1471.65 | 8447.9 | 1 | 2329.2 | 84.6 | 24 | K.LNLVDLAGSENIGR.S            |
| * | Hs293FLP_Ti_302.2543.25   | 2.4482 | 0.1117 | 1470.68 | 1471.65 | 2778.8 | 4 | 199.3  | 53.8 | 1  | K.LNLVDLAGSENIGR.S            |
| * | HsFlag1P_Ti_102.2790.279  | 5.5066 | 0.2119 | 1470.79 | 1471.65 | 9070.1 | 1 | 2724.8 | 88.5 | 3  | K.LNLVDLAGSENIGR.S            |
| * | HsHeLa_Control_Ti_103.27  | 2.6447 | 0.1578 | 1470.84 | 1471.65 | 2757.7 | 4 | 255.6  | 57.7 | 1  | K.LNLVDLAGSENIGR.S            |
| * | HsFlag1P_Ti_102.2795.279  | 2.6629 | 0.1484 | 1471.03 | 1471.65 | 3012.9 | 2 | 244.7  | 53.8 | 1  | K.LNLVDLAGSENIGR.S            |
| * | HsF-IP-293-MG_Ti_102.240  | 5.1081 | 0.2297 | 1471.18 | 1471.65 | 7574.3 | 1 | 1792.9 | 80.8 | 63 | K.LNLVDLAGSENIGR.S            |
| * | HsHeLa_Control-MG_Ti_20   | 5.4225 | 0.2225 | 1471.51 | 1471.65 | 7380.1 | 1 | 1955.2 | 84.6 | 13 | K.LNLVDLAGSENIGR.S            |
| * | Hs293FLP_Ti_302.2534.25   | 4.3326 | 0.1535 | 1471.79 | 1471.65 | 6846.6 | 1 | 1719.6 | 80.8 | 3  | K.LNLVDLAGSENIGR.S            |
| * | HsFLAG-Control_293_Ti_20  | 3.8419 | 0.3048 | 2028.62 | 2029.26 | 8061.7 | 1 | 902.4  | 52.6 | 3  | K.LNLVDLAGSENIGRSGAVDK.R      |
| * | HsFlag1P_Ti_106.2509.250  | 4.9416 | 0.3893 | 1714.37 | 1713.94 | 8492.2 | 1 | 2042.4 | 76.7 | 2  | R.AREAGNINQSLTLGR.V           |
| * | HsFLAG-Control_293_Ti_20  | 4.6518 | 0.4161 | 1485.81 | 1486.67 | 7641.8 | 1 | 1367.7 | 76.9 | 68 | R.EAGNINQSLTLGR.V             |
| * | HsF-IP-293_Ti_103.1529.15 | 3.0713 | 0.1626 | 901.35  | 901.094 | 3661.7 | 3 | 720.4  | 92.9 | 4  | R.VITALVER.T                  |
| * | Hs293FLP-MG_Ti_302.128    | 2.1533 | 0.1941 | 958.41  | 959.09  | 3726.6 | 2 | 348.8  | 75   | 2  | R.ILQDSLGGGR.T                |
| * | HsFLAG-Control_293_Ti_20  | 2.1698 | 0.2523 | 958.51  | 959.09  | 4446.2 | 2 | 312.4  | 62.5 | 2  | R.ILQDSLGGGR.T                |
| * | HsFLAG-Control_293_Ti_20  | 2.8034 | 0.1115 | 958.79  | 959.09  | 4606.4 | 1 | 1022.3 | 87.5 | 6  | R.ILQDSLGGGR.T                |
| * | HsF-IP-293_Ti_102.1316.13 | 3.1109 | 0.1888 | 959.39  | 959.09  | 4250.3 | 1 | 1007.2 | 93.8 | 2  | R.ILQDSLGGGR.T                |
| * | HsF-IP-293-MG_Ti_106.269  | 3.9262 | 0.3391 | 2831.33 | 2832.18 | 7406.2 | 1 | 609.7  | 36   | 20 | R.TSIATISPASLNLEETLSTLEYAHR.A |
| * | HsFLAG-Control_HeLa_S10   | 4.4265 | 0.3235 | 2833.12 | 2832.18 | 4946.1 | 2 | 433.9  | 26   | 3  | R.TSIATISPASLNLEETLSTLEYAHR.A |
| * | HsHeLa_Control_Ti_106.37  | 3.9567 | 0.3801 | 2833.29 | 2832.18 | 8061   | 1 | 695.5  | 36   | 4  | R.TSIATISPASLNLEETLSTLEYAHR.A |
| * | HsFLAG-Control_HeLa_NE    | 3.5761 | 0.183  | 1297.46 | 1297.5  | 6307.6 | 6 | 1000.4 | 80   | 8  | K.NILNKPEVNQK.L               |
| * | HsFlag1P_Ti_106.2418.241  | 4.0148 | 0.2916 | 1623.07 | 1622.86 | 6314.2 | 1 | 1497.5 | 83.3 | 1  | K.KALIKEYTEEIER.L             |
| * | HsFlag1P_Ti_103.2221.222  | 4.1641 | 0.3696 | 1494.22 | 1494.69 | 4860.3 | 1 | 1036.6 | 81.8 | 3  | K.ALIKEYTEEIER.L              |
| * | HsFLAG-Control_MG_293_    | 3.1114 | 0.207  | 1327.48 | 1328.42 | 3347   | 1 | 292.9  | 70   | 1  | K.NGVYISEENFR.V               |
| * | Hs293FLP_Ti_302.1771.17   | 2.7373 | 0.1362 | 1327.6  | 1328.42 | 2242.2 | 1 | 235.4  | 75   | 2  | K.NGVYISEENFR.V               |
| * | Hs293FLP-MG_Ti_102.203    | 1.8228 | 0.1737 | 1327.74 | 1328.42 | 2206.8 | 3 | 134.4  | 65   | 1  | K.NGVYISEENFR.V               |
| * | HsF-IP-293-MG_Ti_102.172  | 3.6064 | 0.3172 | 1328.12 | 1328.42 | 4622   | 1 | 1067.2 | 80   | 6  | K.NGVYISEENFR.V               |
| * | HsFLAG-Control_293_Ti_20  | 2.7315 | 0.1317 | 1328.28 | 1328.42 | 3107.9 | 6 | 182.1  | 60   | 4  | K.NGVYISEENFR.V               |
| * | HsFLAG-Control_MG_293_    | 3.6243 | 0.0901 | 1328.32 | 1328.42 | 4543.6 | 1 | 978.3  | 80   | 1  | K.NGVYISEENFR.V               |
| * | Hs293FLP-MG_Ti_202.214    | 3.4714 | 0.0967 | 1328.4  | 1328.42 | 6791.2 | 1 | 1353   | 80   | 1  | K.NGVYISEENFR.V               |
| * | HsF-IP-293_Ti_102.1603.16 | 3.4341 | 0.2018 | 1328.47 | 1328.42 | 4593.4 | 1 | 1056.2 | 80   | 14 | K.NGVYISEENFR.V               |
| * | HsFlag1P_Ti_102.2218.221  | 2.7759 | 0.2086 | 1328.63 | 1328.42 | 2644.7 | 1 | 249.4  | 65   | 1  | K.NGVYISEENFR.V               |
| * | Hs293FLP_Ti_302.1766.17   | 3.2331 | 0.1888 | 1328.79 | 1328.42 | 4148.8 | 1 | 1103.9 | 85   | 2  | K.NGVYISEENFR.V               |



|   |                           |        |        |         |         |         |   |        |      |                                       |
|---|---------------------------|--------|--------|---------|---------|---------|---|--------|------|---------------------------------------|
| * | HsHeLa_Control-MG_Ti_20   | 5.5676 | 0.2805 | 1672.46 | 1671.93 | 8984.1  | 1 | 2449   | 84.6 | 96 K.LTVQEEQIVELIEK.I                 |
| * | Hs293FLP-MG_Ti_302.139    | 2.4214 | 0.1589 | 1129.33 | 1130.24 | 3063.7  | 2 | 252.5  | 66.7 | 2 K.IGAVEEELNR.V                      |
| * | HsF-IP-293-MG_Ti_102.154  | 1.9857 | 0.1984 | 1129.47 | 1130.24 | 3700.6  | 3 | 279.9  | 66.7 | 1 K.IGAVEEELNR.V                      |
| * | HsFLAG-Control_MG_293_    | 2.6143 | 0.1874 | 1129.5  | 1130.24 | 4315.6  | 1 | 431.1  | 72.2 | 2 K.IGAVEEELNR.V                      |
| * | HsHeLa_Control-MG_Ti_20   | 2.4056 | 0.1491 | 1129.61 | 1130.24 | 2871    | 1 | 259.1  | 72.2 | 2 K.IGAVEEELNR.V                      |
| * | Hs293FLP-MG_Ti_202.187    | 2.3776 | 0.2118 | 1129.66 | 1130.24 | 4012.5  | 1 | 336.3  | 66.7 | 2 K.IGAVEEELNR.V                      |
| * | HsHeLa_Control_Ti_102.15  | 2.4344 | 0.217  | 1129.77 | 1130.24 | 3051.5  | 1 | 295.7  | 66.7 | 1 K.IGAVEEELNR.V                      |
| * | Hs293FLP_Ti_302.1536.15   | 1.9777 | 0.2645 | 1129.86 | 1130.24 | 2978.9  | 1 | 226.6  | 61.1 | 1 K.IGAVEEELNR.V                      |
| * | HsFLAG-Control_293_Ti_2(  | 3.7943 | 0.2692 | 1129.94 | 1130.24 | 5900.9  | 1 | 1272.5 | 88.9 | 4 K.IGAVEEELNR.V                      |
| * | HsFLAG-Control_MG_293_    | 3.7897 | 0.2201 | 1130.03 | 1130.24 | 5606.4  | 1 | 1322.5 | 94.4 | 2 K.IGAVEEELNR.V                      |
| * | Hs293FLP-MG_Ti_202.187(   | 3.1894 | 0.1307 | 1130.41 | 1130.24 | 6471.1  | 1 | 1143.1 | 83.3 | 2 K.IGAVEEELNR.V                      |
| * | HsFLAG-MOCK_300mM_T       | 3.674  | 0.2286 | 1130.42 | 1130.24 | 5296.6  | 1 | 1275.9 | 94.4 | 5 K.IGAVEEELNR.V                      |
| * | Hs293FLP-MG_Ti_102.173    | 3.8477 | 0.2596 | 1131.07 | 1130.24 | 4990.9  | 1 | 1236.2 | 94.4 | 3 K.IGAVEEELNR.V                      |
| * | HsHeLa_Control-MG_Ti_20   | 3.9001 | 0.1757 | 1131.35 | 1130.24 | 6363.2  | 1 | 1461.9 | 94.4 | 5 K.IGAVEEELNR.V                      |
| * | HsFLAG-MOCK_150mM_T       | 5.0839 | 0.3843 | 3096.24 | 3096.4  | 10648.5 | 1 | 1577.9 | 33   | 3 K.IGAVEEELNR/VTELFMDNKNELDQCK.S     |
| * | HsFLAG-Control_293_Ti_2(  | 2.8075 | 0.2367 | 1096.43 | 1097.27 | 5867.1  | 9 | 458.1  | 68.8 | 2 R.VTELFMDNK.N                       |
| * | HsFLAG-Control_MG_293_    | 3.5789 | 0.2141 | 1984.88 | 1985.18 | 10025.8 | 4 | 1021.9 | 38.3 | 1 R.VTELFMDNKNELDQCK.S                |
| * | Hs293FLP-MG_Ti_306.241(   | 4.9133 | 0.4539 | 1985.02 | 1985.18 | 6336.2  | 1 | 1270.5 | 70   | 2 R.VTELFMDNKNELDQCK.S                |
| * | HsFLAG-Control_293_Ti_2(  | 5.1145 | 0.4847 | 1985.79 | 1985.18 | 8353.1  | 1 | 1365   | 63.3 | 53 R.VTELFMDNKNELDQCK.S               |
| * | Hs293FLP-MG_Ti_206.316(   | 4.2227 | 0.3431 | 3670.45 | 3671.1  | 10037.2 | 1 | 629.6  | 21.8 | 1 K.HLQETKLQLVKEEYITSALESTEELHDAASK.L |
| * | HsFLAG-Control_293_Ti_2(  | 5.945  | 0.5211 | 2209.83 | 2211.47 | 7921.7  | 1 | 2527.4 | 75   | 4 K.LQLVKEEYITSALESTEEL.L             |
| * | Hs293FLP-MG_Ti_204.279    | 5.2603 | 0.4108 | 2210.32 | 2211.47 | 10203.6 | 1 | 1194.7 | 34.7 | 5 K.LQLVKEEYITSALESTEEL.L             |
| * | Hs293FLP-MG_Ti_203.292    | 6.0707 | 0.4811 | 2210.86 | 2211.47 | 9737.8  | 1 | 3585.2 | 77.8 | 5 K.LQLVKEEYITSALESTEEL.L             |
| * | HsHeLa_Control-MG_Ti_20   | 6.2662 | 0.4915 | 2210.91 | 2211.47 | 7651.9  | 1 | 1554   | 63.9 | 8 K.LQLVKEEYITSALESTEEL.L             |
| * | Hs283FLP_Ti_106.2387.23   | 6.6612 | 0.4623 | 2211.01 | 2211.47 | 7723.6  | 1 | 2680.5 | 75   | 4 K.LQLVKEEYITSALESTEEL.L             |
| * | Hs293FLP_Ti_303.2555.25   | 6.2866 | 0.4435 | 2211.06 | 2211.47 | 7726.9  | 1 | 2639.6 | 75   | 8 K.LQLVKEEYITSALESTEEL.L             |
| * | HsHeLa_Control-MG_Ti_10   | 5.3929 | 0.4987 | 2211.09 | 2211.47 | 7040.5  | 1 | 1776.4 | 66.7 | 6 K.LQLVKEEYITSALESTEEL.L             |
| * | HsHeLa_Control-MG_Ti_10   | 4.4045 | 0.3684 | 2211.38 | 2211.47 | 7386.6  | 1 | 1198.4 | 38.9 | 1 K.LQLVKEEYITSALESTEEL.L             |
| * | HsF-IP-293-MG_Ti_106.23(  | 4.893  | 0.3498 | 2211.47 | 2211.47 | 7914.7  | 1 | 1183.5 | 38.9 | 2 K.LQLVKEEYITSALESTEEL.L             |
| * | HsHeLa_Control-MG_Ti_20   | 5.5885 | 0.3812 | 2211.49 | 2211.47 | 8465.2  | 1 | 1499.8 | 43.1 | 5 K.LQLVKEEYITSALESTEEL.L             |
| * | Hs293FLP_Ti_303.2554.25   | 5.5633 | 0.2874 | 2211.76 | 2211.47 | 8180.4  | 1 | 1374.9 | 40.3 | 8 K.LQLVKEEYITSALESTEEL.L             |
| * | HsHeLa_Control_Ti_106.32  | 5.8934 | 0.4442 | 2212.85 | 2211.47 | 8704.8  | 1 | 2849.8 | 75   | 9 K.LQLVKEEYITSALESTEEL.L             |
| * | Hs283FLP_Ti_106.2392.23   | 5.0537 | 0.4115 | 2213.19 | 2211.47 | 7494.1  | 1 | 1076.5 | 38.9 | 2 K.LQLVKEEYITSALESTEEL.L             |
| * | HsHeLa_Control_Ti_105.31  | 5.6928 | 0.3351 | 2213.21 | 2211.47 | 7503.4  | 1 | 1320.5 | 41.7 | 5 K.LQLVKEEYITSALESTEEL.L             |
| * | Hs293FLP-MG_Ti_204.342    | 6.6876 | 0.4417 | 2934.07 | 2934.27 | 9093    | 1 | 1265.8 | 33   | 8 K.LQLVKEEYITSALESTEELHDAASK.L       |
| * | HsF-IP-293_Ti_102.1738.17 | 5.0592 | 0.3464 | 1630.45 | 1629.72 | 6874.9  | 1 | 1772.8 | 80.8 | 39 K.EEYITSALESTEEL.L                 |
| * | HsHeLa_Control-MG_Ti_20   | 2.3609 | 0.0934 | 1147.48 | 1148.3  | 6393.1  | 8 | 433.7  | 66.7 | 1 K.LLNTVEETTK.D                      |
| * | HsFLAG-Control_MG_293_    | 2.6737 | 0.1741 | 1147.52 | 1148.3  | 8159.6  | 5 | 542.6  | 66.7 | 2 K.LLNTVEETTK.D                      |
| * | Hs293FLP-MG_Ti_102.160    | 2.5442 | 0.255  | 1147.64 | 1148.3  | 6231.6  | 6 | 457.7  | 72.2 | 1 K.LLNTVEETTK.D                      |
| * | HsFLAG-Control_MG_293_    | 3.1493 | 0.2104 | 1148.21 | 1148.3  | 5012.6  | 4 | 821.6  | 83.3 | 1 K.LLNTVEETTK.D                      |
| * | HsFLAG-MOCK_300mM_T       | 3.4947 | 0.2445 | 1148.23 | 1148.3  | 5165.5  | 1 | 1067.6 | 88.9 | 1 K.LLNTVEETTK.D                      |
| * | HsHeLa_Control-MG_Ti_20   | 3.5594 | 0.289  | 1148.23 | 1148.3  | 4769.3  | 9 | 777.2  | 83.3 | 4 K.LLNTVEETTK.D                      |
| * | Hs293FLP-MG_Ti_202.176    | 3.1137 | 0.111  | 1148.41 | 1148.3  | 5398.5  | 5 | 913.5  | 83.3 | 1 K.LLNTVEETTK.D                      |
| * | HsFlag1P_Ti_105.2100.210  | 4.1778 | 0.4173 | 1971.32 | 1972.2  | 9629.9  | 1 | 1521.7 | 61.8 | 2 K.LLNTVEETTKDVSGLHSLK.L             |
| * | Hs293FLP-MG_Ti_205.146    | 2.0362 | 0.2243 | 1226.61 | 1227.36 | 4464.6  | 7 | 304.2  | 55   | 1 K.DVSGLHSLKDR.K                     |
| * | Hs293FLP-MG_Ti_205.146    | 3.2403 | 0.3825 | 1227.65 | 1227.36 | 8599.6  | 1 | 1353.5 | 85   | 1 K.DVSGLHSLKDR.K                     |
| * | Hs293FLP_Ti_304.1334.13   | 3.4089 | 0.3332 | 1227.78 | 1227.36 | 6992.2  | 1 | 1203.2 | 90   | 5 K.DVSGLHSLKDR.K                     |
| * | HsFlag1P_Ti_106.2329.232  | 5.2939 | 0.3914 | 1771.15 | 1771.93 | 9386.9  | 1 | 1902   | 70   | 1 K.KAVDQHNAAEQDIFGK.N                |
| * | HsF-IP-293-MG_Ti_103.16(  | 4.9912 | 0.4323 | 1643.39 | 1643.75 | 8457.1  | 1 | 2111.1 | 75   | 40 K.AVDQHNAAEQDIFGK.N                |

|   |                           |        |        |         |         |         |   |        |      |    |                                   |
|---|---------------------------|--------|--------|---------|---------|---------|---|--------|------|----|-----------------------------------|
| * | HsFLAG-Control_MG_293_    | 5.0854 | 0.395  | 1643.47 | 1643.75 | 8726.1  | 1 | 1697.4 | 67.9 | 52 | K.AVDQHNAEAQDIFGK.N               |
| * | Hs293FLP-MG_Ti_203.175    | 3.8252 | 0.1872 | 1645.52 | 1643.75 | 3876.3  | 1 | 773.3  | 46.4 | 1  | K.AVDQHNAEAQDIFGK.N               |
| * | Hs293FLP_Ti_302.3946.39   | 4.76   | 0.3238 | 1679.89 | 1679.93 | 5110.3  | 1 | 944.1  | 73.1 | 62 | K.NLNSLFNNMEELIK.D                |
| * | Hs293FLP-MG_Ti_203.461    | 4.5714 | 0.2302 | 1269.95 | 1270.56 | 7744    | 1 | 1625.2 | 85   | 54 | K.TVLQELINVLK.T                   |
| * | Hs293FLP-MG_Ti_205.008    | 3.5703 | 0.1215 | 2160.81 | 2160.62 | 5448.9  | 1 | 514.6  | 39.5 | 1  | K.TDLLSSLEMILSPTVVSILK.I          |
| * | HsFLAG-Control_293_Ti_2(  | 3.0618 | 0.2173 | 1447.64 | 1448.61 | 5382.7  | 1 | 681.7  | 66.7 | 3  | K.TSLTVADKIEDQK.K                 |
| * | HsFLAG-Control_293_Ti_2(  | 4.1341 | 0.2359 | 1448.3  | 1448.61 | 6053.7  | 1 | 1074.2 | 75   | 13 | K.TSLTVADKIEDQK.K                 |
| * | HsHeLa_Control-MG_Ti_20   | 4.0324 | 0.2349 | 1448.54 | 1448.61 | 5097.4  | 2 | 1114.4 | 79.2 | 1  | K.TSLTVADKIEDQK.K                 |
| * | Hs293FLP-MG_Ti_204.155    | 4.2392 | 0.1413 | 1576.54 | 1576.79 | 6566.7  | 2 | 1333.6 | 73.1 | 35 | K.TSLTVADKIEDQK.K                 |
| * | HsHeLa_Control-MG_Ti_20   | 5.7585 | 0.3909 | 3533.7  | 3533.89 | 7910.6  | 1 | 1126.8 | 28.4 | 7  | K.KELDGFLSILCNLHELQENTICSLVESQK.Q |
| * | Hs293FLP-MG_Ti_205.000    | 6.4379 | 0.4491 | 3406.37 | 3405.72 | 9862.6  | 1 | 1429.6 | 30.4 | 49 | K.ELDGFLSILCNLHELQENTICSLVESQK.Q  |
| * | HsFLAG-Control_293_Ti_2(  | 2.7063 | 0.2301 | 1177.81 | 1178.25 | 4779.8  | 1 | 692.3  | 88.9 | 3  | K.QCGNLTEDLK.T                    |
| * | HsFLAG-Control_MG_293_    | 2.1343 | 0.1663 | 1062.46 | 1063.26 | 4859.3  | 2 | 259.2  | 71.4 | 1  | K.LMNLWTER.F                      |
| * | Hs293FLP_Ti_302.1378.13   | 2.3117 | 0.0809 | 896.59  | 896.982 | 8004.7  | 5 | 895.9  | 83.3 | 3  | R.FCALEEK.C                       |
| * | HsF-IP-293-MG_Ti_102.14(  | 2.5679 | 0.0803 | 897.34  | 896.982 | 3336.4  | 1 | 685.1  | 100  | 1  | R.FCALEEK.C                       |
| * | HsFlag1P_Ti_105.2224.222  | 6.1771 | 0.4206 | 3022.08 | 3022.31 | 5527.6  | 1 | 1335.5 | 39.6 | 5  | R.FCALEEKCENIQKPLSSVQENIQK.S      |
| * | HsHeLa_Control-MG_Ti_20   | 5.666  | 0.3109 | 2143.38 | 2144.36 | 5239.5  | 1 | 1435.4 | 73.5 | 6  | K.CENIQKPLSSVQENIQK.S             |
| * | HsFLAG-Control_MG_293_    | 4.6153 | 0.2146 | 2143.49 | 2144.36 | 4892.7  | 1 | 780.5  | 61.8 | 5  | K.CENIQKPLSSVQENIQK.S             |
| * | HsF-IP-293-MG_Ti_104.15(  | 5.0989 | 0.3068 | 2143.65 | 2144.36 | 4560.6  | 1 | 1293.3 | 76.5 | 4  | K.CENIQKPLSSVQENIQK.S             |
| * | HsFLAG-Control_293_Ti_2(  | 5.3789 | 0.2339 | 2143.76 | 2144.36 | 5027.2  | 1 | 1296.4 | 70.6 | 7  | K.CENIQKPLSSVQENIQK.S             |
| * | Hs293FLP-MG_Ti_105.165    | 4.0264 | 0.2806 | 2143.94 | 2144.36 | 4009.7  | 1 | 693    | 64.7 | 1  | K.CENIQKPLSSVQENIQK.S             |
| * | HsHeLa_Control-MG_Ti_20   | 6.4512 | 0.3109 | 2144.06 | 2144.36 | 9266.4  | 1 | 3494.6 | 54.4 | 3  | K.CENIQKPLSSVQENIQK.S             |
| * | HsFLAG-Control_293_Ti_2(  | 6.1535 | 0.2842 | 2144.46 | 2144.36 | 8718.7  | 1 | 2925.5 | 52.9 | 2  | K.CENIQKPLSSVQENIQK.S             |
| * | HsF-IP-293-MG_Ti_104.15(  | 6.0556 | 0.3439 | 2144.89 | 2144.36 | 8627    | 1 | 2873.9 | 52.9 | 2  | K.CENIQKPLSSVQENIQK.S             |
| * | Hs293FLP-MG_Ti_105.166    | 5.4647 | 0.2965 | 2145.15 | 2144.36 | 6607.4  | 1 | 2734.8 | 55.9 | 2  | K.CENIQKPLSSVQENIQK.S             |
| * | HsF-IP-293_Ti_103.1378.1( | 3.3954 | 0.2816 | 1371.27 | 1371.53 | 7687.6  | 1 | 1184.1 | 77.3 | 1  | K.PLSSVQENIQK.S                   |
| * | HsFLAG-Control_293_Ti_2(  | 2.128  | 0.2044 | 1531.37 | 1532.57 | 3716.9  | 4 | 224.2  | 45.8 | 1  | K.FCADSDGFSQELR.N                 |
| * | Hs293FLP-MG_Ti_202.220    | 1.876  | 0.1539 | 1531.39 | 1532.57 | 4179.3  | 7 | 263    | 50   | 1  | K.FCADSDGFSQELR.N                 |
| * | HsFLAG-Control_MG_293_    | 1.9991 | 0.2202 | 1531.4  | 1532.57 | 4506.2  | 1 | 274.4  | 50   | 1  | K.FCADSDGFSQELR.N                 |
| * | HsF-IP-293-MG_Ti_102.17(  | 4.7453 | 0.5049 | 1532.39 | 1532.57 | 5741.6  | 1 | 1508.9 | 83.3 | 6  | K.FCADSDGFSQELR.N                 |
| * | HsHeLa_Control-MG_Ti_10   | 4.922  | 0.3685 | 1532.81 | 1532.57 | 5583.7  | 1 | 1626.6 | 87.5 | 23 | K.FCADSDGFSQELR.N                 |
| * | HsFLAG-Control_MG_293_    | 4.6077 | 0.4468 | 1533.06 | 1532.57 | 6490    | 1 | 1974.2 | 91.7 | 3  | K.FCADSDGFSQELR.N                 |
| * | Hs293FLP-MG_Ti_202.220    | 4.1554 | 0.383  | 1534.47 | 1532.57 | 6419.6  | 1 | 1321.5 | 79.2 | 2  | K.FCADSDGFSQELR.N                 |
| * | Hs293FLP-MG_Ti_203.254    | 2.8564 | 0.2351 | 2450.73 | 2451.53 | 8619.9  | 6 | 301.5  | 32.5 | 2  | K.FCADSDGFSQELRNFNQEGTK.L         |
| * | Hs293FLP-MG_Ti_203.395    | 4.7694 | 0.4167 | 3237.36 | 3236.44 | 9405.3  | 1 | 889.2  | 25.9 | 1  | K.FCADSDGFSQELRNFNQEGTKLVEESVK.H  |
| * | HsFlag1P_Ti_103.2206.220  | 5.0402 | 0.2835 | 1723.59 | 1722.89 | 8761.7  | 1 | 2065.2 | 78.6 | 6  | R.NFNQEGTKLVEESVK.H               |
| * | HsFlag1P_Ti_103.1694.169  | 3.5818 | 0.1442 | 1851.43 | 1851.93 | 7279.6  | 3 | 674    | 57.1 | 1  | K.ISQETEQRCELSNTR.T               |
| * | Hs293FLP-MG_Ti_204.301    | 4.9037 | 0.4363 | 1846.62 | 1846.01 | 8289.5  | 1 | 1657.5 | 75   | 32 | R.TVYFSEQWVSSLNER.E               |
| * | Hs293FLP-MG_Ti_203.321    | 4.5095 | 0.3855 | 2905.89 | 2907.05 | 7534.2  | 1 | 846.2  | 43.8 | 8  | R.EQELHNLLEVVSQCCEASSSDITEK.S     |
| * | HsHeLa_Control-MG_Ti_20   | 6.681  | 0.4644 | 2906.14 | 2907.05 | 7323.6  | 1 | 2238.7 | 42.7 | 7  | R.EQELHNLLEVVSQCCEASSSDITEK.S     |
| * | HsF-IP-293-MG_Ti_106.24(  | 5.0163 | 0.32   | 2906.31 | 2907.05 | 9906.1  | 1 | 2161.9 | 37.5 | 2  | R.EQELHNLLEVVSQCCEASSSDITEK.S     |
| * | Hs293FLP-MG_Ti_203.318    | 6.7841 | 0.4495 | 2906.55 | 2907.05 | 9533.1  | 1 | 2593.5 | 40.6 | 14 | R.EQELHNLLEVVSQCCEASSSDITEK.S     |
| * | HsFLAG-Control_293_Ti_2(  | 4.8282 | 0.2897 | 2906.56 | 2907.05 | 10380.2 | 2 | 705.8  | 37.5 | 2  | R.EQELHNLLEVVSQCCEASSSDITEK.S     |
| * | HsHeLa_Control_Ti_104.34  | 5.8576 | 0.3674 | 2907.01 | 2907.05 | 8318.3  | 1 | 1766.6 | 37.5 | 4  | R.EQELHNLLEVVSQCCEASSSDITEK.S     |
| * | HsHeLa_Control_Ti_105.33  | 3.8042 | 0.1598 | 2907.13 | 2907.05 | 6387.4  | 2 | 400.5  | 33.3 | 3  | R.EQELHNLLEVVSQCCEASSSDITEK.S     |
| * | HsHeLa_Control-MG_Ti_20   | 4.5113 | 0.3924 | 2907.29 | 2907.05 | 8114.9  | 1 | 808.5  | 39.6 | 6  | R.EQELHNLLEVVSQCCEASSSDITEK.S     |
| * | HsFLAG-Control_293_Ti_2(  | 4.0192 | 0.3179 | 1848.02 | 1848.04 | 8601.9  | 1 | 935.1  | 60.7 | 5  | K.QHNIFLDQMTIDEDK.L               |
| * | Hs293FLP-MG_Ti_205.349    | 4.8632 | 0.2992 | 3327.15 | 3328.76 | 8202.6  | 1 | 959.2  | 29.6 | 16 | K.QHNIFLDQMTIDEDKLIQNLELNETIK.I   |
| * | HsFLAG-Control_MG_293_    | 3.6538 | 0.1884 | 1498.51 | 1499.75 | 6621.7  | 2 | 631.2  | 62.5 | 4  | K.LIAQNLELNETIK.I                 |

|                    |                          |        |        |         |         |        |     |        |                                 |    |                                 |
|--------------------|--------------------------|--------|--------|---------|---------|--------|-----|--------|---------------------------------|----|---------------------------------|
| *                  | HsHeLa_Control-MG_Ti_20  | 3.2416 | 0.2145 | 1498.51 | 1499.75 | 5717.2 | 2   | 507.9  | 62.5                            | 2  | K.LIAQNLELNETIK.I               |
| *                  | HsFLAG-Control_293_Ti_20 | 3.6181 | 0.1419 | 1498.51 | 1499.75 | 6615.7 | 1   | 576.8  | 58.3                            | 4  | K.LIAQNLELNETIK.I               |
| *                  | Hs293FLP-MG_Ti_202.247   | 2.6663 | 0.1743 | 1498.53 | 1499.75 | 7825.1 | 2   | 636    | 58.3                            | 1  | K.LIAQNLELNETIK.I               |
| *                  | HsHeLa_Control_Ti_103.22 | 3.1666 | 0.1342 | 1498.68 | 1499.75 | 5062.6 | 1   | 480    | 62.5                            | 1  | K.LIAQNLELNETIK.I               |
| *                  | Hs293FLP_Ti_302.2060.20  | 3.0015 | 0.1211 | 1498.82 | 1499.75 | 4737.2 | 8   | 316    | 54.2                            | 2  | K.LIAQNLELNETIK.I               |
| *                  | HsFLAG-Control_MG_293_   | 4.5709 | 0.1881 | 1498.86 | 1499.75 | 7442.6 | 1   | 1817.5 | 83.3                            | 39 | K.LIAQNLELNETIK.I               |
| *                  | HsFLAG-Control_293_Ti_20 | 4.5816 | 0.1976 | 1499.23 | 1499.75 | 6865.5 | 1   | 1793.1 | 87.5                            | 42 | K.LIAQNLELNETIK.I               |
| *                  | Hs293FLP-MG_Ti_202.247   | 4.4361 | 0.1862 | 1499.56 | 1499.75 | 6734.8 | 1   | 1582.9 | 83.3                            | 4  | K.LIAQNLELNETIK.I               |
| *                  | HsFLAG-Control_HeLa_S10  | 4.4016 | 0.1738 | 1499.65 | 1499.75 | 6752.2 | 1   | 1328.7 | 79.2                            | 8  | K.LIAQNLELNETIK.I               |
| *                  | Hs293FLP_Ti_302.2058.20  | 4.2465 | 0.1623 | 1499.71 | 1499.75 | 6055.7 | 1   | 1523   | 83.3                            | 2  | K.LIAQNLELNETIK.I               |
| *                  | HsHeLa_Control-MG_Ti_20  | 4.5665 | 0.1684 | 1499.83 | 1499.75 | 7209.2 | 1   | 1672.1 | 83.3                            | 15 | K.LIAQNLELNETIK.I               |
| *                  | HsHeLa_Control-MG_Ti_10  | 3.4436 | 0.1248 | 1279.68 | 1280.43 | 6282   | 8   | 651.2  | 72.2                            | 1  | K.LNCFLEQDLK.L                  |
| *                  | HsFLAG-Control_HeLa_S10  | 3.7336 | 0.1439 | 1280.32 | 1280.43 | 7853.8 | 3   | 1441.5 | 88.9                            | 5  | K.LNCFLEQDLK.L                  |
| *                  | HsF-IP-293-MG_Ti_102.19  | 3.7523 | 0.1743 | 1280.45 | 1280.43 | 7463.9 | 3   | 1491.3 | 88.9                            | 18 | K.LNCFLEQDLK.L                  |
| *                  | HsFlag1P_Ti_106.2766.276 | 5.4534 | 0.3819 | 2459.78 | 2460.76 | 7683.4 | 1   | 1191.1 | 52.5                            | 4  | K.LNCFLEQDLKLDIPTGTTTPQR.K      |
| *                  | Hs293FLP-MG_Ti_205.273   | 3.6665 | 0.2414 | 2587.87 | 2588.93 | 7886.2 | 5   | 501.8  | 35.7                            | 1  | K.LNCFLEQDLKLDIPTGTTTPQRK.S     |
| *                  | Hs293FLP-MG_Ti_205.272   | 5.3142 | 0.3147 | 2588.17 | 2588.93 | 8538.1 | 1   | 1435.1 | 36.9                            | 2  | K.LNCFLEQDLKLDIPTGTTTPQRK.S     |
| *                  | HsFLAG-MOCK_300mM_T      | 3.1591 | 0.1522 | 1199.25 | 1199.35 | 4231.5 | 6   | 533.3  | 75                              | 1  | K.LDIPTGTTTPQR.K                |
| *                  | HsFlag1P_Ti_106.2440.244 | 3.0151 | 0.1486 | 1327.62 | 1327.57 | 4977.5 | 2   | 639.6  | 65                              | 2  | R.KSYLYPSTLVR.T                 |
| *                  | Hs283FLP_Ti_102.1923.19  | 2.8433 | 0.126  | 1199.69 | 1199.39 | 3471.9 | 7   | 491.6  | 72.2                            | 2  | K.SYLYPSTLVR.T                  |
| *                  | Hs293FLP-MG_Ti_206.293   | 3.5079 | 0.2132 | 2659.45 | 2660.05 | 5725.9 | 1   | 549.8  | 31                              | 1  | K.SYLYPSTLVRTEPREHLLDQLK.R      |
| *                  | HsHeLa_Control-MG_Ti_20  | 2.549  | 0.1902 | 995.37  | 996.152 | 2353.7 | 4   | 162.2  | 71.4                            | 3  | R.EHLLDQLK.R                    |
| *                  | Hs293FLP-MG_Ti_205.168   | 2.6317 | 0.1402 | 1151.64 | 1152.34 | 3513.9 | 3   | 246.2  | 68.8                            | 2  | R.EHLLDQLKR.K                   |
| *                  | Hs293FLP-MG_Ti_205.168   | 2.5472 | 0.1725 | 1151.66 | 1152.34 | 4809.9 | 2   | 573.7  | 81.2                            | 1  | R.EHLLDQLKR.K                   |
| *                  | HsFlag1P_Ti_106.2366.236 | 2.8849 | 0.2001 | 1151.94 | 1152.34 | 4669.8 | 1   | 574.9  | 81.2                            | 3  | R.EHLLDQLKR.K                   |
| *                  | Hs293FLP-MG_Ti_205.189   | 3.3845 | 0.2843 | 2285.76 | 2285.56 | 7912.3 | 3   | 358    | 39.5                            | 2  | R.GINTLERSKVEETTEHLVTK.S        |
| *                  | HsHeLa_Control-MG_Ti_20  | 2.5968 | 0.4073 | 1500.49 | 1501.68 | 3683.1 | 8   | 244.2  | 45.8                            | 2  | R.SKVEETTEHLVTK.S               |
| *                  | Hs293FLP-MG_Ti_204.147   | 2.0322 | 0.2589 | 1500.56 | 1501.68 | 5525.8 | 7   | 369.1  | 50                              | 1  | R.SKVEETTEHLVTK.S               |
| *                  | HsFLAG-Control_MG_293_   | 2.3703 | 0.2814 | 1500.57 | 1501.68 | 5874.6 | 2   | 435.3  | 54.2                            | 1  | R.SKVEETTEHLVTK.S               |
| *                  | HsFLAG-Control_293_Ti_20 | 4.9122 | 0.3104 | 1500.62 | 1501.68 | 7865   | 1   | 2079.7 | 87.5                            | 24 | R.SKVEETTEHLVTK.S               |
| *                  | HsFLAG-Control_293_Ti_20 | 3.0025 | 0.1337 | 1500.72 | 1501.68 | 4873.4 | 1   | 454.1  | 58.3                            | 2  | R.SKVEETTEHLVTK.S               |
| *                  | Hs293FLP-MG_Ti_204.147   | 4.8443 | 0.3004 | 1501.04 | 1501.68 | 8253.1 | 1   | 2222.4 | 87.5                            | 2  | R.SKVEETTEHLVTK.S               |
| *                  | Hs293FLP-MG_Ti_306.226   | 2.4665 | 0.239  | 1501.45 | 1501.68 | 3808   | 3   | 348.2  | 54.2                            | 1  | R.SKVEETTEHLVTK.S               |
| *                  | HsFlag1P_Ti_104.1798.179 | 4.7562 | 0.2566 | 1501.62 | 1501.68 | 8192.3 | 1   | 1906.2 | 83.3                            | 15 | R.SKVEETTEHLVTK.S               |
| *                  | Hs283FLP_Ti_105.1301.13  | 5.0565 | 0.2866 | 1501.67 | 1501.68 | 7311.4 | 1   | 1622   | 79.2                            | 11 | R.SKVEETTEHLVTK.S               |
| *                  | Hs293FLP-MG_Ti_204.147   | 4.3597 | 0.3706 | 1502.08 | 1501.68 | 5109.9 | 2   | 849.6  | 50                              | 2  | R.SKVEETTEHLVTK.S               |
| *                  | HsFLAG-Control_MG_293_   | 4.5572 | 0.2857 | 1502.27 | 1501.68 | 8181.7 | 1   | 1876.1 | 83.3                            | 23 | R.SKVEETTEHLVTK.S               |
| *                  | Hs293FLP-MG_Ti_306.225   | 4.548  | 0.3087 | 1503.17 | 1501.68 | 6703.3 | 1   | 1584.3 | 83.3                            | 1  | R.SKVEETTEHLVTK.S               |
| *                  | Hs293FLP-MG_Ti_103.124   | 3.8194 | 0.2674 | 1287.64 | 1286.43 | 7431.1 | 1   | 1373.3 | 80                              | 4  | K.VEETTEHLVTK.S                 |
| gij 5174735 ref NF |                          | 87     | 532    | 0.667   | 445     | 49831  | 4.9 | U      | tubulin, beta, 2 [Homo sapiens] |    |                                 |
| *                  | HsHeLa_Control-MG_Ti_10  | 3.167  | 0.2606 | 3117.27 | 3118.3  | 3315.1 | 1   | 242.8  | 32.7                            | 2  | K.FWEVISDEHGIDPTGTYHGDSDLQLER.I |
| *                  | Hs293FLP-MG_Ti_203.296   | 6.0012 | 0.2864 | 3117.83 | 3118.3  | 8093.8 | 1   | 1675.5 | 37.5                            | 7  | K.FWEVISDEHGIDPTGTYHGDSDLQLER.I |
| *                  | HsFLAG-Control_HeLa_S10  | 5.6644 | 0.367  | 3117.88 | 3118.3  | 8579.6 | 1   | 912.3  | 28.8                            | 15 | K.FWEVISDEHGIDPTGTYHGDSDLQLER.I |
| *                  | HsFLAG-Control_HeLa_S10  | 2.8883 | 0.2416 | 1328.42 | 1329.45 | 6895.9 | 1   | 497.7  | 59.1                            | 2  | R.INVYYNEATGGK.Y                |
| *                  | HsFLAG-Control_HeLa_S10  | 2.4601 | 0.2357 | 1328.45 | 1329.45 | 6448.3 | 1   | 497.3  | 59.1                            | 1  | R.INVYYNEATGGK.Y                |
| *                  | HsHeLa_Control-MG_Ti_10  | 1.8417 | 0.2504 | 1328.55 | 1329.45 | 5416.6 | 1   | 325    | 54.5                            | 1  | R.INVYYNEATGGK.Y                |
| *                  | HsFLAG-Control_HeLa_S10  | 3.5461 | 0.3202 | 1329.1  | 1329.45 | 5511.6 | 1   | 1202.8 | 81.8                            | 6  | R.INVYYNEATGGK.Y                |
| *                  | HsFLAG-Control_HeLa_S10  | 3.232  | 0.2695 | 1329.32 | 1329.45 | 5673.1 | 2   | 946    | 77.3                            | 2  | R.INVYYNEATGGK.Y                |
| *                  | HsFLAG-Control_HeLa_S10  | 3.4415 | 0.2029 | 1329.33 | 1329.45 | 5054.6 | 1   | 934.9  | 77.3                            | 10 | R.INVYYNEATGGK.Y                |

|                          |        |        |         |         |         |   |        |      |                                                    |
|--------------------------|--------|--------|---------|---------|---------|---|--------|------|----------------------------------------------------|
| HsHeLa-FLAG-IP_S100_Ti   | 3.8964 | 0.3342 | 1603.75 | 1602.84 | 4509.3  | 1 | 1068   | 75   | 18 R.AVLVDLEPGTMSVR.S                              |
| HsFLAG-Control_293_Ti_1( | 4.3497 | 0.4199 | 2798.44 | 2800.07 | 7089.6  | 1 | 789.7  | 42   | 2 R.SGPFQIFRPDNFVFGQSGAGNNWAK.G                    |
| HsFLAG-Control_HeLa_Ti_1 | 7.086  | 0.3585 | 2798.77 | 2800.07 | 8023.8  | 1 | 2007.6 | 39   | 1 R.SGPFQIFRPDNFVFGQSGAGNNWAK.G                    |
| HsHeLa_Control_Ti_106.35 | 3.3717 | 0.284  | 2799.08 | 2800.07 | 7040.2  | 1 | 509.9  | 34   | 1 R.SGPFQIFRPDNFVFGQSGAGNNWAK.G                    |
| HsFLAG-Control_HeLa_NE   | 5.559  | 0.4744 | 2799.13 | 2800.07 | 8777.8  | 1 | 1234   | 44   | 3 R.SGPFQIFRPDNFVFGQSGAGNNWAK.G                    |
| Hs293FLP_Ti_306.3134.31: | 4.4896 | 0.3405 | 2799.39 | 2800.07 | 5985.1  | 1 | 712.5  | 40   | 3 R.SGPFQIFRPDNFVFGQSGAGNNWAK.G                    |
| HsFLAG-Control_HeLa_S1(  | 5.0217 | 0.2644 | 2799.44 | 2800.07 | 9812.3  | 1 | 1983   | 35   | 4 R.SGPFQIFRPDNFVFGQSGAGNNWAK.G                    |
| HsFLAG-Control_HeLa_Ti_1 | 4.9745 | 0.3403 | 2799.45 | 2800.07 | 9442    | 1 | 1330.7 | 46   | 2 R.SGPFQIFRPDNFVFGQSGAGNNWAK.G                    |
| Hs293FLP-MG_Ti_206.324:  | 5.6902 | 0.3542 | 2799.53 | 2800.07 | 9458.1  | 1 | 2291.7 | 38   | 3 R.SGPFQIFRPDNFVFGQSGAGNNWAK.G                    |
| HsFLAG-Control_293_Ti_1( | 6.1007 | 0.3859 | 2799.74 | 2800.07 | 9348.5  | 1 | 3099.1 | 42   | 2 R.SGPFQIFRPDNFVFGQSGAGNNWAK.G                    |
| HsFLAG-Control_HeLa_S1(  | 5.4454 | 0.3567 | 2799.89 | 2800.07 | 7677.5  | 1 | 1212.9 | 46   | 3 R.SGPFQIFRPDNFVFGQSGAGNNWAK.G                    |
| HsHeLa_Control-MG_Ti_20  | 5.2597 | 0.3817 | 2799.92 | 2800.07 | 8298.5  | 1 | 1407.9 | 48   | 8 R.SGPFQIFRPDNFVFGQSGAGNNWAK.G                    |
| HsFLAG-Control_HeLa_S1(  | 4.9984 | 0.3992 | 2799.99 | 2800.07 | 8366    | 1 | 1288.2 | 46   | 5 R.SGPFQIFRPDNFVFGQSGAGNNWAK.G                    |
| HsHeLa_Control_Ti_106.35 | 5.7438 | 0.2886 | 2800.05 | 2800.07 | 8407.2  | 1 | 2280   | 38   | 3 R.SGPFQIFRPDNFVFGQSGAGNNWAK.G                    |
| HsFLAG-Control_HeLa_S1(  | 6.1803 | 0.4125 | 2800.31 | 2800.07 | 9515.8  | 1 | 2575.2 | 39   | 10 R.SGPFQIFRPDNFVFGQSGAGNNWAK.G                   |
| Hs293FLP-MG_Ti_206.324:  | 4.0474 | 0.285  | 2800.79 | 2800.07 | 6819.9  | 1 | 693.4  | 38   | 4 R.SGPFQIFRPDNFVFGQSGAGNNWAK.G                    |
| Hs293FLP_Ti_306.3122.31: | 5.4056 | 0.2637 | 2801.19 | 2800.07 | 8261.6  | 1 | 1963.1 | 38   | 2 R.SGPFQIFRPDNFVFGQSGAGNNWAK.G                    |
| HsHeLa_Control-MG_Ti_20  | 6.5624 | 0.445  | 2801.2  | 2800.07 | 8704.9  | 1 | 2240.6 | 38   | 7 R.SGPFQIFRPDNFVFGQSGAGNNWAK.G                    |
| HsFLAG-Control_HeLa_NE   | 6.3579 | 0.3994 | 2801.45 | 2800.07 | 8898.9  | 1 | 2491.9 | 40   | 3 R.SGPFQIFRPDNFVFGQSGAGNNWAK.G                    |
| HsGST-MOCK_Ti_102.286:   | 3.2049 | 0.3313 | 1958.45 | 1960.15 | 8017.5  | 1 | 762.8  | 52.9 | 1 K.GHYTEGAELVDSVLDVVR.K                           |
| HsFLAG-Control_HeLa_S1(  | 4.1642 | 0.2955 | 1959.3  | 1960.15 | 8544.6  | 2 | 1215.8 | 38.2 | 2 K.GHYTEGAELVDSVLDVVR.K                           |
| HsGST-MOCK_Ti_403.395:   | 4.7164 | 0.3422 | 1959.33 | 1960.15 | 10548.9 | 1 | 1301.9 | 55.9 | 1 K.GHYTEGAELVDSVLDVVR.K                           |
| HsFLAG-Control_HeLa_NE   | 5.3562 | 0.4242 | 1959.63 | 1960.15 | 11243.1 | 1 | 2825.8 | 70.6 | 3 K.GHYTEGAELVDSVLDVVR.K                           |
| Hs293FLP_Ti_303.3357.33: | 4.1617 | 0.1819 | 1959.92 | 1960.15 | 7405    | 2 | 1468.9 | 42.6 | 6 K.GHYTEGAELVDSVLDVVR.K                           |
| HsHeLa_Control-MG_Ti_10  | 6.1452 | 0.4266 | 1959.96 | 1960.15 | 8101.6  | 1 | 2856.7 | 79.4 | 5 K.GHYTEGAELVDSVLDVVR.K                           |
| Hs293FLP-MG_Ti_205.353:  | 4.315  | 0.1813 | 1959.98 | 1960.15 | 9417.8  | 1 | 1643   | 41.2 | 5 K.GHYTEGAELVDSVLDVVR.K                           |
| Hs293FLP-MG_Ti_204.367   | 6.6846 | 0.431  | 1959.98 | 1960.15 | 10282.1 | 1 | 3961.5 | 82.4 | 8 K.GHYTEGAELVDSVLDVVR.K                           |
| Hs293FLP_Ti_306.3198.31: | 6.98   | 0.3863 | 1960.01 | 1960.15 | 9148.7  | 1 | 3744.2 | 85.3 | 7 K.GHYTEGAELVDSVLDVVR.K                           |
| HsFLAG-Control_HeLa_S1(  | 4.5919 | 0.2553 | 1960.03 | 1960.15 | 7594.6  | 1 | 1242.3 | 41.2 | 2 K.GHYTEGAELVDSVLDVVR.K                           |
| HsHeLa_Control-MG_Ti_10  | 3.5165 | 0.1922 | 1960.13 | 1960.15 | 6171.6  | 3 | 834.7  | 35.3 | 1 K.GHYTEGAELVDSVLDVVR.K                           |
| HsHeLa_Control-MG_Ti_20  | 4.3353 | 0.2198 | 1960.22 | 1960.15 | 8005.9  | 1 | 1897.4 | 47.1 | 2 K.GHYTEGAELVDSVLDVVR.K                           |
| HsFLAG-Control_HeLa_S1(  | 5.8707 | 0.417  | 1960.53 | 1960.15 | 9914.1  | 1 | 3928.7 | 82.4 | 2 K.GHYTEGAELVDSVLDVVR.K                           |
| HsHeLa_Control-MG_Ti_20  | 6.9239 | 0.4578 | 1960.6  | 1960.15 | 10283.3 | 1 | 4222.7 | 85.3 | 8 K.GHYTEGAELVDSVLDVVR.K                           |
| HsHeLa_Control_Ti_105.38 | 6.5934 | 0.4301 | 1960.92 | 1960.15 | 9241.8  | 1 | 3541.4 | 82.4 | 7 K.GHYTEGAELVDSVLDVVR.K                           |
| HsFLAG-Control_HeLa_NE   | 4.632  | 0.1653 | 1961.1  | 1960.15 | 7796.1  | 7 | 1433.4 | 44.1 | 1 K.GHYTEGAELVDSVLDVVR.K                           |
| HsHeLa_Control_Ti_105.38 | 3.9939 | 0.1774 | 1961.13 | 1960.15 | 6245.6  | 2 | 1192.6 | 45.6 | 2 K.GHYTEGAELVDSVLDVVR.K                           |
| HsFLAG-Control_HeLa_S1(  | 4.764  | 0.2325 | 1961.21 | 1960.15 | 8029.8  | 1 | 1535   | 42.6 | 2 K.GHYTEGAELVDSVLDVVR.K                           |
| HsFLAG-Control_HeLa_S1(  | 6.9041 | 0.4463 | 1961.25 | 1960.15 | 11475.7 | 1 | 4165.7 | 82.4 | 14 K.GHYTEGAELVDSVLDVVR.K                          |
| HsFLAG-Control_HeLa_S1(  | 5.9828 | 0.4073 | 1961.57 | 1960.15 | 10193.9 | 1 | 3020.1 | 76.5 | 5 K.GHYTEGAELVDSVLDVVR.K                           |
| HsGST-MOCK_Ti_102.285:   | 4.2626 | 0.1599 | 1962    | 1960.15 | 7062.2  | 4 | 1185.6 | 41.2 | 1 K.GHYTEGAELVDSVLDVVR.K                           |
| Hs293FLP_Ti_306.3098.30: | 6.1016 | 0.4085 | 2088.19 | 2088.33 | 9030.4  | 1 | 2434   | 72.2 | 2 K.GHYTEGAELVDSVLDVVRK.E                          |
| HsHeLa_Control_Ti_106.36 | 2.6425 | 0.3564 | 2089.18 | 2088.33 | 10954.4 | 1 | 669    | 41.7 | 1 K.GHYTEGAELVDSVLDVVRK.E                          |
| HsFLAG-MOCK_300mM_T      | 4.8098 | 0.3951 | 2089.85 | 2088.33 | 6163.4  | 1 | 1098.1 | 41.7 | 3 K.GHYTEGAELVDSVLDVVRK.E                          |
| Hs293FLP_Ti_305.3017.30  | 5.121  | 0.3371 | 2090.41 | 2088.33 | 6587.3  | 1 | 1579.1 | 48.6 | 9 K.GHYTEGAELVDSVLDVVRK.E                          |
| HsFLAG-Control_HeLa_S1(  | 2.9498 | 0.2063 | 1077.69 | 1078.17 | 5287.5  | 3 | 749.1  | 85.7 | 5 K.IREEYPDR.I                                     |
| HsFLAG-MOCK_300mM_T      | 2.7654 | 0.1191 | 2380.24 | 2379.74 | 5288.7  | 1 | 385.4  | 44.7 | 2 K.IREEYPDRIMNTFSVVPSPK.V                         |
| HsFLAG-Control_MG_293_   | 4.3284 | 0.3282 | 1320.01 | 1320.59 | 8983.2  | 1 | 1855   | 86.4 | 18 R.IMNTFSVVPSPK.V                                |
| HsFLAG-Control_HeLa_S1(  | 5.2299 | 0.4574 | 4594.42 | 4595.9  | 5984.7  | 1 | 689.3  | 24.3 | K.VSDTVVEPYNATLSVHQLVENTDETYCIDNEALYDICF<br>26 R.T |



|                   |                          |        |        |         |         |        |     |        |                                           |    |                                    |
|-------------------|--------------------------|--------|--------|---------|---------|--------|-----|--------|-------------------------------------------|----|------------------------------------|
| *                 | HsHeLa3_Ti_103.2616.261  | 4.207  | 0.3451 | 1766.32 | 1764.89 | 7142.2 | 1   | 1227.8 | 69.2                                      | 2  | K.LISWYDNEFGYSNR.V                 |
| *                 | HsHeLa3_Ti_104.1797.179  | 2.7996 | 0.3241 | 1330.61 | 1331.59 | 5786.7 | 1   | 764.2  | 63.6                                      | 2  | R.VVDLMAHMASKE.-                   |
| *                 | HsHeLa3_Ti_104.1791.179  | 4.1343 | 0.399  | 1333    | 1331.59 | 8588.3 | 1   | 2065.5 | 86.4                                      | 3  | R.VVDLMAHMASKE.-                   |
| gi 5453854 ref NF |                          | 28     | 178    | 0.643   | 356     | 37526  | 7.1 | U      | poly(rC) binding protein 1 [Homo sapiens] |    |                                    |
| *                 | HsFLAG-MOCK_300mM_T      | 3.7768 | 0.4013 | 1482.96 | 1482.83 | 6028.7 | 1   | 1195.7 | 76.9                                      | 2  | R.LLMHGKEVGSIIIGK.K                |
| *                 | HsFLAG-Control_HeLa_NE   | 4.0721 | 0.1996 | 1289.32 | 1289.35 | 6636.7 | 1   | 1467.5 | 85                                        | 25 | R.INISEGNCPER.I                    |
| *                 | HsFLAG-Control_HeLa_Ti_1 | 3.6999 | 0.2829 | 1388.52 | 1389.68 | 6003   | 1   | 826.6  | 66.7                                      | 23 | R.IITLTGPTNAIFK.A                  |
| *                 | HsHeLa3_Ti_105.2578.257  | 2.6483 | 0.1456 | 1388.72 | 1389.68 | 6787.6 | 8   | 469.5  | 54.2                                      | 1  | R.IITLTGPTNAIFK.A                  |
| *                 | HsFlag1P_Ti_106.2705.270 | 3.5084 | 0.1563 | 1389.29 | 1389.68 | 6667.9 | 1   | 918.4  | 70.8                                      | 1  | R.IITLTGPTNAIFK.A                  |
| *                 | HsGST-MOCK_Ti_405.288    | 3.6479 | 0.2065 | 1389.44 | 1389.68 | 5710.3 | 4   | 586.7  | 62.5                                      | 2  | R.IITLTGPTNAIFK.A                  |
| *                 | HsGST-MOCK_Ti_405.288    | 3.204  | 0.3397 | 1389.61 | 1389.68 | 5200   | 1   | 417    | 58.3                                      | 2  | R.IITLTGPTNAIFK.A                  |
| *                 | HsFLAG-Control_HeLa_S1(  | 2.9727 | 0.1913 | 1389.76 | 1389.68 | 8626.4 | 9   | 574.8  | 54.2                                      | 1  | R.IITLTGPTNAIFK.A                  |
| *                 | HsFLAG-Control_HeLa_S1(  | 3.919  | 0.246  | 1390.67 | 1389.68 | 5321.7 | 1   | 557.4  | 62.5                                      | 25 | R.IITLTGPTNAIFK.A                  |
| *                 | HsFLAG-MOCK_300mM_T      | 3.6211 | 0.1013 | 3382.83 | 3380.86 | 7482.6 | 1   | 1361.9 | 30                                        | 1  | K.AFAMIDKLEEDINSSMTNSTAASRPPVTLR.L |
| *                 | HsFLAG-Control_HeLa_NE   | 3.4887 | 0.3209 | 1443.07 | 1443.69 | 4183.9 | 1   | 818.2  | 80.8                                      | 13 | R.LVVPATQCGSLIGK.G                 |
| *                 | HsFLAG-MOCK_300mM_T      | 2.9765 | 0.3942 | 1847.67 | 1846.11 | 4089.8 | 1   | 462.9  | 55.9                                      | 1  | R.LVVPATQCGSLIGKGGCK.I             |
| *                 | HsGST-MOCK_Ti_402.221    | 4.9595 | 0.4065 | 2090.84 | 2091.26 | 6640.2 | 1   | 1123.5 | 57.9                                      | 9  | R.ESSTAQAQVQVAGDMLPNSTER.A         |
| *                 | HsFLAG-Control_HeLa_NE   | 3.3786 | 0.2379 | 1675.77 | 1673.91 | 3331.3 | 1   | 525.3  | 66.7                                      | 6  | R.AITIAGVPSVTECVK.Q                |
| *                 | HsFlag1P_Ti_106.2868.286 | 3.9102 | 0.3213 | 1960.39 | 1961.25 | 9202.7 | 1   | 1851.1 | 68.8                                      | 4  | K.QICLVMLETSLSQSPQGR.V             |
| *                 | HsGST-MOCK_Ti_305.265    | 3.2328 | 0.1608 | 2476.73 | 2476.83 | 5640.9 | 3   | 317.7  | 38.6                                      | 5  | R.VMTIPYQMPASSPVICAGGQDR.C         |
| *                 | HsFLAG-MOCK_300mM_T      | 3.2162 | 0.2821 | 2607.96 | 2607.88 | 8553.2 | 1   | 527.7  | 35.4                                      | 2  | R.QQSHFAMMHGGTGFAGIDSSSPEVK.G      |
| *                 | HsFLAG-Control_HeLa_NE   | 2.6697 | 0.1274 | 1015.45 | 1015.11 | 4576.3 | 9   | 476.3  | 87.5                                      | 2  | R.QGANINEIR.Q                      |
| *                 | HsFLAG-Control_HeLa_NE   | 1.92   | 0.1222 | 1086.63 | 1087.18 | 6335.1 | 1   | 472.1  | 65                                        | 1  | K.IANPVEGSSGR.Q                    |
| *                 | HsFLAG-Control_HeLa_S1(  | 2.9209 | 0.1875 | 1087.22 | 1087.18 | 5252.7 | 1   | 856.7  | 80                                        | 9  | K.IANPVEGSSGR.Q                    |
| *                 | HsHeLa3_Ti_103.1324.132  | 2.5211 | 0.1814 | 1087.68 | 1087.18 | 4880.5 | 1   | 700.3  | 75                                        | 1  | K.IANPVEGSSGR.Q                    |
| *                 | HsFLAG-Control_HeLa_S1(  | 5.2006 | 0.443  | 2178.18 | 2178.49 | 8009.3 | 1   | 1216.5 | 37.5                                      | 2  | R.QVTITGSAASISLAQYLINAR.L          |
| *                 | HsFLAG-Control_HeLa_NE   | 5.3258 | 0.4747 | 2178.32 | 2178.49 | 8518.4 | 1   | 1324.6 | 55                                        | 9  | R.QVTITGSAASISLAQYLINAR.L          |
| *                 | HsFLAG-Control_HeLa_S1(  | 3.9746 | 0.3195 | 2179.03 | 2178.49 | 8915.3 | 9   | 791.5  | 31.2                                      | 1  | R.QVTITGSAASISLAQYLINAR.L          |
| *                 | HsFLAG-Control_HeLa_S1(  | 4.0234 | 0.386  | 2179.25 | 2178.49 | 8828   | 1   | 561.8  | 40                                        | 1  | R.QVTITGSAASISLAQYLINAR.L          |
| *                 | HsFLAG-Control_HeLa_NE   | 5.9485 | 0.4232 | 2179.68 | 2178.49 | 6692.3 | 1   | 1547.7 | 62.5                                      | 13 | R.QVTITGSAASISLAQYLINAR.L          |
| *                 | HsGST-MOCK_Ti_404.390    | 5.385  | 0.4275 | 2180.02 | 2178.49 | 7139.2 | 1   | 1240.6 | 57.5                                      | 10 | R.QVTITGSAASISLAQYLINAR.L          |
| *                 | HsFLAG-Control_HeLa_NE   | 5.4215 | 0.4277 | 2180.6  | 2178.49 | 9444.7 | 1   | 1696.7 | 40                                        | 6  | R.QVTITGSAASISLAQYLINAR.L          |
| gi 13129110 ref N |                          | 91     | 912    | 0.643   | 342     | 36724  | 5.2 | U      | methylosome protein 50 [Homo sapiens]     |    |                                    |
| *                 | HsHeLa_Control-MG_Ti_20  | 2.5695 | 0.3433 | 1372.56 | 1373.64 | 3555.4 | 1   | 355.5  | 58.3                                      | 1  | R.KETPPPLVPPAAR.E                  |
| *                 | HsFLAG-Control_293_Ti_2( | 2.3426 | 0.2261 | 1372.59 | 1373.64 | 5832   | 9   | 340.3  | 50                                        | 2  | R.KETPPPLVPPAAR.E                  |
| *                 | HsF-IP-293-MG_Ti_106.20  | 1.8225 | 0.1866 | 1372.63 | 1373.64 | 5070.9 | 2   | 357.4  | 54.2                                      | 1  | R.KETPPPLVPPAAR.E                  |
| *                 | HsFLAG-Control_293_Ti_2( | 3.3503 | 0.2436 | 1373.33 | 1373.64 | 7206.4 | 4   | 757.6  | 62.5                                      | 1  | R.KETPPPLVPPAAR.E                  |
| *                 | Hs293FLP-MG_Ti_206.256   | 2.9851 | 0.2265 | 1373.41 | 1373.64 | 7115.5 | 4   | 577.3  | 54.2                                      | 1  | R.KETPPPLVPPAAR.E                  |
| *                 | HsF-IP-293_Ti_206.2111.2 | 2.1987 | 0.2397 | 1373.59 | 1373.64 | 5722.6 | 7   | 401.5  | 54.2                                      | 1  | R.KETPPPLVPPAAR.E                  |
| *                 | HsHeLa_Control-MG_Ti_20  | 3.056  | 0.2335 | 1373.69 | 1373.64 | 6134.5 | 4   | 630.7  | 62.5                                      | 1  | R.KETPPPLVPPAAR.E                  |
| *                 | HsF-IP-293_Ti_206.2108.2 | 3.2839 | 0.1374 | 1375.71 | 1373.64 | 6560.4 | 9   | 605    | 58.3                                      | 4  | R.KETPPPLVPPAAR.E                  |
| *                 | HsFLAG-Control_MG_293_   | 2.4613 | 0.2512 | 1244.56 | 1245.46 | 2860.3 | 7   | 184.9  | 59.1                                      | 9  | K.ETPPPLVPPAAR.E                   |
| *                 | HsFLAG-Control_MG_293_   | 3.6616 | 0.1439 | 1685.65 | 1685.86 | 4335.9 | 2   | 428.7  | 61.5                                      | 24 | R.EWNLPPNAPACMER.Q                 |
| *                 | HsFLAG-Control_293_Ti_1( | 4.1659 | 0.3168 | 1723.46 | 1723.93 | 6145.2 | 1   | 1324.3 | 68.8                                      | 12 | R.YRSDGALLLGASSLSGR.C              |
| *                 | HsFLAG-Control_293_Ti_2( | 4.9156 | 0.3678 | 1723.48 | 1723.93 | 6103   | 1   | 2470   | 84.4                                      | 7  | R.YRSDGALLLGASSLSGR.C              |
| *                 | HsFLAG-Control_MG_293_   | 4.5491 | 0.3422 | 1723.59 | 1723.93 | 6450.1 | 1   | 2048.9 | 78.1                                      | 3  | R.YRSDGALLLGASSLSGR.C              |
| *                 | Hs283FLP_Ti_106.2193.21  | 4.8078 | 0.2991 | 1723.84 | 1723.93 | 5431   | 1   | 1902.8 | 81.2                                      | 11 | R.YRSDGALLLGASSLSGR.C              |
| *                 | Hs293FLP-MG_Ti_205.223   | 4.2603 | 0.2431 | 1724.03 | 1723.93 | 5783.3 | 1   | 1197.2 | 45.3                                      | 4  | R.YRSDGALLLGASSLSGR.C              |
| *                 | HsFLAG-Control_293_Ti_1( | 4.3961 | 0.2626 | 1724.19 | 1723.93 | 7096.2 | 1   | 1453.5 | 45.3                                      | 1  | R.YRSDGALLLGASSLSGR.C              |

|   |                           |        |        |         |         |         |   |        |      |     |                                    |
|---|---------------------------|--------|--------|---------|---------|---------|---|--------|------|-----|------------------------------------|
| * | HsHeLa_Control-MG_Ti_20   | 4.0451 | 0.2991 | 1724.22 | 1723.93 | 7750.8  | 1 | 1660.6 | 45.3 | 2   | R.YRSDGALLLGASSLSGR.C              |
| * | HsHeLa_Control-MG_Ti_20   | 4.5179 | 0.3268 | 1724.42 | 1723.93 | 5332.3  | 1 | 1475.7 | 75   | 6   | R.YRSDGALLLGASSLSGR.C              |
| * | Hs293FLP_Ti_304.2029.20   | 4.0697 | 0.1265 | 1724.91 | 1723.93 | 7606.5  | 4 | 1081.9 | 37.5 | 3   | R.YRSDGALLLGASSLSGR.C              |
| * | HsHeLa_Control-MG_Ti_10   | 4.1275 | 0.2227 | 1724.97 | 1723.93 | 6261.8  | 1 | 1281   | 42.2 | 2   | R.YRSDGALLLGASSLSGR.C              |
| * | HsHeLa_Control_Ti_105.27  | 5.0428 | 0.282  | 1725.14 | 1723.93 | 5257.6  | 1 | 1486   | 75   | 10  | R.YRSDGALLLGASSLSGR.C              |
| * | HsFLAG-Control_293_Ti_2(  | 1.9328 | 0.2005 | 1404.02 | 1404.56 | 2634.6  | 3 | 231.4  | 53.6 | 1   | R.SDGALLLGASSLSGR.C                |
| * | HsFLAG-Control_293_Ti_1(  | 5.3567 | 0.4425 | 1404.38 | 1404.56 | 6904.9  | 1 | 1885.5 | 82.1 | 9   | R.SDGALLLGASSLSGR.C                |
| * | HsFLAG-Control_293_Ti_1(  | 2.4155 | 0.1854 | 1404.68 | 1404.56 | 2537.2  | 1 | 236    | 57.1 | 1   | R.SDGALLLGASSLSGR.C                |
| * | HsHeLa_Control_Ti_103.23  | 4.9503 | 0.4005 | 1404.96 | 1404.56 | 5803    | 1 | 1402.9 | 75   | 73  | R.SDGALLLGASSLSGR.C                |
| * | HsFLAG-Control_293_Ti_2(  | 5.2513 | 0.4063 | 1405.34 | 1404.56 | 5942.2  | 1 | 1515.7 | 78.6 | 56  | R.SDGALLLGASSLSGR.C                |
| * | HsHeLa_Control-MG_Ti_10   | 2.4926 | 0.2297 | 1267.78 | 1268.47 | 3592.2  | 3 | 221.7  | 61.1 | 1   | R.CWAGSLWLFK.D                     |
| * | HsFLAG-Control_Hela_Ti_1  | 2.9653 | 0.0949 | 1268.18 | 1268.47 | 4530.7  | 1 | 781.2  | 83.3 | 4   | R.CWAGSLWLFK.D                     |
| * | Hs293FLP-MG_Ti_204.362    | 3.0286 | 0.153  | 1268.19 | 1268.47 | 4849.3  | 1 | 932.6  | 88.9 | 4   | R.CWAGSLWLFK.D                     |
| * | HsF-IP-293-MG_Ti_106.26(  | 2.512  | 0.1274 | 1268.55 | 1268.47 | 3880.8  | 6 | 215.9  | 61.1 | 2   | R.CWAGSLWLFK.D                     |
| * | Hs293FLP_Ti_304.3282.32   | 3.569  | 0.2116 | 1269.01 | 1268.47 | 4124.9  | 1 | 679.4  | 83.3 | 24  | R.CWAGSLWLFK.D                     |
| * | Hs293FLP-MG_Ti_203.330    | 4.9557 | 0.4059 | 3164.65 | 3166.32 | 7604.5  | 1 | 977    | 43.1 | 9   | K.DPCAAPNEGFCSAGVQTEAGVADLTWVGER.G |
| * | Hs293FLP-MG_Ti_205.306    | 3.8772 | 0.3632 | 3165.59 | 3166.32 | 10306.2 | 1 | 1006.3 | 27.6 | 1   | K.DPCAAPNEGFCSAGVQTEAGVADLTWVGER.G |
| * | HsFLAG-Control_293_Ti_2(  | 5.5596 | 0.4698 | 3165.88 | 3166.32 | 8768.7  | 1 | 1530.8 | 46.6 | 6   | K.DPCAAPNEGFCSAGVQTEAGVADLTWVGER.G |
| * | HsFLAG-Control_293_Ti_1(  | 5.0886 | 0.4506 | 3166.07 | 3166.32 | 8697.9  | 1 | 1121.4 | 41.4 | 56  | K.DPCAAPNEGFCSAGVQTEAGVADLTWVGER.G |
| * | HsFLAG-Control_293_Ti_2(  | 5.0908 | 0.3357 | 3166.34 | 3166.32 | 10361.7 | 1 | 1128.8 | 27.6 | 1   | K.DPCAAPNEGFCSAGVQTEAGVADLTWVGER.G |
| * | HsFLAG-Control_293_Ti_1(  | 4.7969 | 0.3433 | 3167.91 | 3166.32 | 9808    | 1 | 1021.6 | 26.7 | 1   | K.DPCAAPNEGFCSAGVQTEAGVADLTWVGER.G |
| * | Hs293FLP-MG_Ti_206.338    | 5.333  | 0.3742 | 2789.79 | 2789.11 | 8485.7  | 1 | 854.3  | 40   | 49  | R.GILVASDSGAVELWELDENETLIVSK.F     |
| * | Hs293FLP-MG_Ti_205.379    | 5.2763 | 0.4056 | 2790.95 | 2789.11 | 6449.4  | 1 | 876.5  | 31   | 1   | R.GILVASDSGAVELWELDENETLIVSK.F     |
| * | HsHeLa_Control-MG_Ti_20   | 4.816  | 0.3918 | 2901.95 | 2903.14 | 7952.5  | 1 | 1476.2 | 34.6 | 4   | K.FCKYEHDDIVSTVSVLSSGTQAVSGSK.D    |
| * | Hs293FLP_Ti_305.2273.22   | 4.9654 | 0.3444 | 2902.13 | 2903.14 | 6605.2  | 1 | 1348.5 | 46.2 | 4   | K.FCKYEHDDIVSTVSVLSSGTQAVSGSK.D    |
| * | HsHeLa_Control-MG_Ti_10   | 5.6784 | 0.4445 | 2902.29 | 2903.14 | 6648.8  | 1 | 1636.5 | 50   | 6   | K.FCKYEHDDIVSTVSVLSSGTQAVSGSK.D    |
| * | Hs293FLP-MG_Ti_205.249    | 4.9764 | 0.3045 | 2902.33 | 2903.14 | 8363.2  | 1 | 2062.2 | 39.4 | 5   | K.FCKYEHDDIVSTVSVLSSGTQAVSGSK.D    |
| * | Hs293FLP-MG_Ti_204.258    | 5.0079 | 0.4577 | 2902.7  | 2903.14 | 7131    | 1 | 1780.9 | 51.9 | 2   | K.FCKYEHDDIVSTVSVLSSGTQAVSGSK.D    |
| * | HsHeLa_Control_Ti_105.30  | 4.3129 | 0.2888 | 2903    | 2903.14 | 6844.5  | 1 | 872.5  | 31.7 | 2   | K.FCKYEHDDIVSTVSVLSSGTQAVSGSK.D    |
| * | Hs293FLP_Ti_305.2269.22   | 4.6182 | 0.2012 | 2903.69 | 2903.14 | 6483.5  | 1 | 1367.6 | 36.5 | 4   | K.FCKYEHDDIVSTVSVLSSGTQAVSGSK.D    |
| * | HsHeLa_Control-MG_Ti_20   | 5.5522 | 0.4382 | 2903.82 | 2903.14 | 7095.9  | 1 | 1668.8 | 51.9 | 7   | K.FCKYEHDDIVSTVSVLSSGTQAVSGSK.D    |
| * | HsHeLa_Control-MG_Ti_10   | 4.3906 | 0.2922 | 2904    | 2903.14 | 6498.4  | 1 | 1024.7 | 31.7 | 3   | K.FCKYEHDDIVSTVSVLSSGTQAVSGSK.D    |
| * | HsF-IP-293_Ti_202.0018.0( | 6.1762 | 0.5637 | 2466.69 | 2467.65 | 8078.3  | 1 | 1781.8 | 56.5 | 19  | K.YEHDDIVSTVSVLSSGTQAVSGSK.D       |
| * | HsF-IP-293-MG_Ti_106.23   | 6.6828 | 0.5114 | 2466.76 | 2467.65 | 8294.8  | 1 | 2246.4 | 63   | 22  | K.YEHDDIVSTVSVLSSGTQAVSGSK.D       |
| * | Hs293FLP_Ti_305.2297.22   | 6.1869 | 0.5108 | 2467.31 | 2467.65 | 7508.4  | 1 | 2039.8 | 60.9 | 15  | K.YEHDDIVSTVSVLSSGTQAVSGSK.D       |
| * | HsFLAG-Control_293_Ti_1(  | 4.7338 | 0.3916 | 2467.38 | 2467.65 | 11091.8 | 1 | 1480   | 32.6 | 6   | K.YEHDDIVSTVSVLSSGTQAVSGSK.D       |
| * | HsHeLa_Control-MG_Ti_20   | 6.8193 | 0.544  | 2467.69 | 2467.65 | 9064.9  | 1 | 2641.6 | 65.2 | 47  | K.YEHDDIVSTVSVLSSGTQAVSGSK.D       |
| * | HsF-IP-293-MG_Ti_105.24   | 3.5523 | 0.3613 | 2467.8  | 2467.65 | 9316.9  | 1 | 934.2  | 30.4 | 1   | K.YEHDDIVSTVSVLSSGTQAVSGSK.D       |
| * | Hs293FLP-MG_Ti_206.295    | 7.0252 | 0.5579 | 2467.83 | 2467.65 | 9396.7  | 1 | 3214.6 | 67.4 | 23  | K.YEHDDIVSTVSVLSSGTQAVSGSK.D       |
| * | Hs293FLP_Ti_305.2298.22   | 3.7286 | 0.2295 | 2467.99 | 2467.65 | 7513.3  | 1 | 780.7  | 29.3 | 1   | K.YEHDDIVSTVSVLSSGTQAVSGSK.D       |
| * | Hs283FLP_Ti_105.2089.20   | 4.6147 | 0.3891 | 2468.05 | 2467.65 | 8784.8  | 1 | 1065.7 | 31.5 | 2   | K.YEHDDIVSTVSVLSSGTQAVSGSK.D       |
| * | HsFLAG-Control_293_Ti_1(  | 6.3625 | 0.4656 | 2468.18 | 2467.65 | 11373.9 | 1 | 1983.1 | 54.3 | 41  | K.YEHDDIVSTVSVLSSGTQAVSGSK.D       |
| * | HsF-IP-293_Ti_202.0003.0( | 4.1796 | 0.3125 | 2468.37 | 2467.65 | 8745.3  | 1 | 927.2  | 29.3 | 2   | K.YEHDDIVSTVSVLSSGTQAVSGSK.D       |
| * | Hs283FLP_Ti_104.2095.20   | 6.0949 | 0.4904 | 2468.82 | 2467.65 | 6648.7  | 1 | 1619.9 | 58.7 | 6   | K.YEHDDIVSTVSVLSSGTQAVSGSK.D       |
| * | HsHeLa_Control-MG_Ti_20   | 3.7803 | 0.3151 | 2469.6  | 2467.65 | 9718.5  | 1 | 1049.5 | 30.4 | 1   | K.YEHDDIVSTVSVLSSGTQAVSGSK.D       |
| * | HsF-IP-293_Ti_202.0122.0  | 5.8109 | 0.2755 | 1665.53 | 1664.9  | 7326.3  | 1 | 2652.6 | 88.5 | 144 | K.VWDLAQQVVLSSYR.A                 |
| * | HsF-IP-293_Ti_206.1956.1  | 3.5097 | 0.4435 | 1547.48 | 1548.71 | 5334.2  | 1 | 773.3  | 64.3 | 2   | R.AHAAQVTCVAASPHK.D                |
| * | HsF-IP-293-MG_Ti_106.18   | 3.9482 | 0.4516 | 1547.54 | 1548.71 | 5069.6  | 1 | 662.4  | 60.7 | 2   | R.AHAAQVTCVAASPHK.D                |
| * | HsHeLa_Control-MG_Ti_20   | 2.6462 | 0.3069 | 1547.55 | 1548.71 | 3867.2  | 1 | 374.3  | 57.1 | 1   | R.AHAAQVTCVAASPHK.D                |

|                   |                           |        |        |         |         |         |   |        |      |                                        |
|-------------------|---------------------------|--------|--------|---------|---------|---------|---|--------|------|----------------------------------------|
| *                 | HsFLAG-Control_293_Ti_20  | 3.7486 | 0.3991 | 1547.7  | 1548.71 | 6165.5  | 1 | 814.6  | 64.3 | 3 R.AHAAQVTCVAASPHK.D                  |
| *                 | HsFLAG-Control_MG_293_    | 5.2403 | 0.4226 | 1547.89 | 1548.71 | 9747.9  | 1 | 2829.2 | 82.1 | 2 R.AHAAQVTCVAASPHK.D                  |
| *                 | HsHeLa_Control-MG_Ti_10   | 3.2046 | 0.2567 | 1547.96 | 1548.71 | 5980    | 2 | 464.8  | 53.6 | 2 R.AHAAQVTCVAASPHK.D                  |
| *                 | HsFLAG-Control_293_Ti_10  | 4.659  | 0.3733 | 1547.96 | 1548.71 | 9297.8  | 1 | 1973.9 | 75   | 3 R.AHAAQVTCVAASPHK.D                  |
| *                 | Hs283FLP_Ti_106.1795.17   | 5.3534 | 0.4751 | 1548.44 | 1548.71 | 8228.1  | 1 | 2421.8 | 82.1 | 7 R.AHAAQVTCVAASPHK.D                  |
| *                 | HsFLAG-Control_293_Ti_10  | 1.837  | 0.1604 | 1548.45 | 1548.71 | 6313.6  | 8 | 271.1  | 42.9 | 1 R.AHAAQVTCVAASPHK.D                  |
| *                 | HsFLAG-Control_293_Ti_20  | 5.0098 | 0.4273 | 1548.48 | 1548.71 | 9513.2  | 1 | 2848.5 | 82.1 | 2 R.AHAAQVTCVAASPHK.D                  |
| *                 | HsF-IP-293_Ti_206.1955.19 | 5.2774 | 0.4043 | 1548.49 | 1548.71 | 9082.8  | 1 | 2583.4 | 78.6 | 3 R.AHAAQVTCVAASPHK.D                  |
| *                 | HsFLAG-Control_MG_293_    | 4.1412 | 0.3208 | 1548.5  | 1548.71 | 6968.1  | 1 | 936.2  | 60.7 | 4 R.AHAAQVTCVAASPHK.D                  |
| *                 | HsFLAG-Control_Hela_Ti_1  | 3.0088 | 0.3227 | 1548.57 | 1548.71 | 6228.2  | 1 | 462    | 50   | 4 R.AHAAQVTCVAASPHK.D                  |
| *                 | HsF-IP-293-MG_Ti_106.18   | 5.3713 | 0.4146 | 1548.69 | 1548.71 | 8329.7  | 1 | 2815.6 | 85.7 | 2 R.AHAAQVTCVAASPHK.D                  |
| *                 | Hs293FLP-MG_Ti_306.215    | 4.4915 | 0.4381 | 1548.81 | 1548.71 | 7948.3  | 1 | 1933.3 | 82.1 | 2 R.AHAAQVTCVAASPHK.D                  |
| *                 | HsFLAG-MOCK_300mM_T       | 5.0209 | 0.4408 | 1548.93 | 1548.71 | 7546    | 1 | 2088   | 78.6 | 4 R.AHAAQVTCVAASPHK.D                  |
| *                 | HsHeLa_Control-MG_Ti_20   | 5.0364 | 0.3925 | 1549.15 | 1548.71 | 9577.1  | 1 | 2272.4 | 75   | 2 R.AHAAQVTCVAASPHK.D                  |
| *                 | HsF-IP-293_Ti_206.1960.19 | 4.3406 | 0.4479 | 1549.28 | 1548.71 | 6322.5  | 1 | 1514.3 | 51.8 | 1 R.AHAAQVTCVAASPHK.D                  |
| *                 | HsFLAG-Control_MG_293_    | 4.9973 | 0.3782 | 1549.54 | 1548.71 | 7627.3  | 1 | 1720.3 | 51.8 | 1 R.AHAAQVTCVAASPHK.D                  |
| *                 | HsF-IP-293-MG_Ti_106.18   | 4.8488 | 0.4245 | 1549.6  | 1548.71 | 6148.7  | 1 | 1660.8 | 55.4 | 2 R.AHAAQVTCVAASPHK.D                  |
| *                 | HsHeLa_Control-MG_Ti_10   | 5.0533 | 0.4544 | 1549.96 | 1548.71 | 7614.1  | 1 | 2410.8 | 82.1 | 2 R.AHAAQVTCVAASPHK.D                  |
| *                 | HsHeLa_Control-MG_Ti_20   | 4.2804 | 0.4139 | 1551.16 | 1548.71 | 8419.6  | 2 | 1035.9 | 41.1 | 2 R.AHAAQVTCVAASPHK.D                  |
| *                 | HsHeLa_Control-MG_Ti_10   | 4.5496 | 0.4174 | 2960.54 | 2959.13 | 5561.6  | 1 | 955.8  | 32.7 | 1 R.AHAAQVTCVAASPHKDSVFLSCSEDNR.I      |
| *                 | HsHeLa_Control-MG_Ti_20   | 2.621  | 0.1616 | 1428.39 | 1429.45 | 2354.8  | 7 | 140.5  | 59.1 | 2 K.DSVFLSCSEDNR.I                     |
| *                 | HsFLAG-Control_293_Ti_10  | 2.519  | 0.3027 | 1428.53 | 1429.45 | 3041.3  | 5 | 192.4  | 54.5 | 1 K.DSVFLSCSEDNR.I                     |
| *                 | HsF-IP-293-MG_Ti_102.16   | 4.1484 | 0.3546 | 1429.24 | 1429.45 | 5892.3  | 1 | 1067.2 | 77.3 | 14 K.DSVFLSCSEDNR.I                    |
| *                 | HsHeLa_Control_Ti_102.16  | 3.919  | 0.3475 | 1429.58 | 1429.45 | 4899.7  | 2 | 786.7  | 72.7 | 16 K.DSVFLSCSEDNR.I                    |
| *                 | HsHeLa_Control-MG_Ti_20   | 4.2038 | 0.4171 | 1431.05 | 1429.45 | 7712.5  | 1 | 1498.2 | 81.8 | 15 K.DSVFLSCSEDNR.I                    |
| *                 |                           |        |        |         |         |         |   |        |      | K.PASQIGCSAPGYLPTSLAWHPQQSEVFVFGDENGTV |
| *                 | Hs293FLP-MG_Ti_205.359    | 5.3897 | 0.378  | 4490.96 | 4492.91 | 7384.5  | 1 | 743.2  | 20.7 | 37 SLVDTK.S                            |
| gi 20070220 ref n | 178                       | 1423   | 0.641  | 637     | 72684   | 6.3 U   |   |        |      | SKB1 homolog [Homo sapiens]            |
| *                 | HsFlag1P_Ti_103.2910.291  | 4.6361 | 0.3047 | 2272.22 | 2273.52 | 7176.9  | 1 | 1520.8 | 54.8 | 5 R.VSSGRDLNCVPEIADTLGAVAK.Q           |
| *                 | Hs293FLP-MG_Ti_203.286    | 3.896  | 0.3434 | 2274    | 2273.52 | 8748.7  | 1 | 659.5  | 38.1 | 8 R.VSSGRDLNCVPEIADTLGAVAK.Q           |
| *                 | HsFlag1P_Ti_103.2935.293  | 4.208  | 0.2323 | 2274.75 | 2273.52 | 5942.7  | 1 | 1259.1 | 38.1 | 2 R.VSSGRDLNCVPEIADTLGAVAK.Q           |
| *                 | Hs293FLP-MG_Ti_302.278    | 2.9379 | 0.1918 | 1786.59 | 1786.99 | 2519.4  | 3 | 329.4  | 59.4 | 1 R.DLNCVPEIADTLGAVAK.Q                |
| *                 | Hs293FLP_Ti_303.2949.29   | 4.2351 | 0.2492 | 1786.78 | 1786.99 | 2558.4  | 1 | 581.2  | 71.9 | 7 R.DLNCVPEIADTLGAVAK.Q                |
| *                 | Hs293FLP-MG_Ti_202.348    | 3.0188 | 0.2174 | 1786.84 | 1786.99 | 3900    | 3 | 525.1  | 56.2 | 2 R.DLNCVPEIADTLGAVAK.Q                |
| *                 | HsF-IP-293-MG_Ti_102.27   | 4.7831 | 0.2725 | 1786.84 | 1786.99 | 8106.6  | 1 | 2416   | 56.2 | 2 R.DLNCVPEIADTLGAVAK.Q                |
| *                 | HsFLAG-Control_293_Ti_10  | 4.2693 | 0.22   | 1786.96 | 1786.99 | 10455.7 | 1 | 2377.4 | 48.4 | 2 R.DLNCVPEIADTLGAVAK.Q                |
| *                 | HsHeLa-FLAG-IP_S100_Ti    | 4.4005 | 0.3883 | 1787.09 | 1786.99 | 2879.2  | 1 | 651.8  | 71.9 | 51 R.DLNCVPEIADTLGAVAK.Q               |
| *                 | Hs293FLP-MG_Ti_202.354    | 4.1197 | 0.2063 | 1787.4  | 1786.99 | 9312.4  | 3 | 1179.8 | 42.2 | 1 R.DLNCVPEIADTLGAVAK.Q                |
| *                 | HsF-IP-293_Ti_202.0140.0  | 4.6834 | 0.224  | 1787.45 | 1786.99 | 7750.4  | 1 | 1678.8 | 48.4 | 1 R.DLNCVPEIADTLGAVAK.Q                |
| *                 | HsFLAG-Control_293_Ti_20  | 4.5563 | 0.4307 | 1787.61 | 1786.99 | 3607    | 1 | 974.6  | 81.2 | 15 R.DLNCVPEIADTLGAVAK.Q               |
| *                 | Hs293FLP_Ti_305.3193.31   | 3.5602 | 0.2322 | 1753.85 | 1752.01 | 5849.7  | 2 | 842.9  | 44.2 | 1 K.QGFDFLCMPVFHPR.F                   |
| *                 | HsHeLa_Control-MG_Ti_20   | 3.2485 | 0.164  | 1393.12 | 1393.63 | 4994.4  | 1 | 775.9  | 80   | 1 R.FKREFIQEPAK.N                      |
| *                 | Hs293FLP-MG_Ti_204.145    | 2.7255 | 0.1352 | 1118.25 | 1118.28 | 4401.9  | 1 | 833.1  | 93.8 | 2 K.REFIQEPAK.N                        |
| *                 | Hs293FLP-MG_Ti_202.173    | 2.668  | 0.0805 | 961.47  | 962.09  | 4058.9  | 9 | 374.5  | 78.6 | 1 R.EFIQEPAK.N                         |
| *                 | HsFlag1P_Ti_106.2829.282  | 5.4079 | 0.3255 | 1887.56 | 1888.17 | 7914.5  | 1 | 1910   | 71.9 | 16 R.SDLLLLSGRDWNTLIVGK.L              |
| *                 | HsF-IP-293-MG_Ti_106.24   | 4.7411 | 0.2808 | 1888.61 | 1888.17 | 7112.9  | 1 | 1418.1 | 65.6 | 5 R.SDLLLLSGRDWNTLIVGK.L               |
| *                 | Hs293FLP_Ti_304.2878.28   | 3.8518 | 0.2126 | 1889.34 | 1888.17 | 5213.2  | 3 | 904.2  | 43.8 | 2 R.SDLLLLSGRDWNTLIVGK.L               |
| *                 | HsHeLa_Control-MG_Ti_20   | 3.6325 | 0.1062 | 3427.18 | 3424.97 | 8949.9  | 2 | 711    | 25.9 | 1 R.SDLLLLSGRDWNTLIVGKLSWPWRPDSKVEK.I  |
| *                 | HsFLAG-Control_293_Ti_20  | 2.7879 | 0.1389 | 1045.48 | 1046.21 | 7300.1  | 1 | 939.2  | 81.2 | 18 R.DWNTLIVGK.L                       |



|   |                           |        |        |         |         |        |   |        |      |    |                                                             |
|---|---------------------------|--------|--------|---------|---------|--------|---|--------|------|----|-------------------------------------------------------------|
| * | Hs293FLP-MG_Ti_102.253    | 2.0933 | 0.0923 | 1046.02 | 1046.21 | 6254.7 | 2 | 808.5  | 81.2 | 2  | R.DWNTLIVGK.L                                               |
| * | HsF-IP-293-MG_Ti_102.205  | 3.2098 | 0.0978 | 1046.4  | 1046.21 | 4444.5 | 2 | 1073.9 | 87.5 | 1  | R.DWNTLIVGK.L                                               |
| * | Hs283FLP_Ti_106.2020.20   | 3.44   | 0.2711 | 1555.9  | 1555.82 | 6242.7 | 1 | 842    | 70.8 | 14 | K.LSPWIRPDSKVEK.I<br>R.RNSEAAMLQELNFGAYLGLPAFLPLNQEDNTNLAR. |
| * | HsHeLa_Control-MG_Ti_20   | 5.2777 | 0.3941 | 4005.21 | 4006.53 | 6679   | 1 | 572.2  | 25   | 3  | V                                                           |
| * | HsF-IP-293-MG_Ti_106.297  | 7.0087 | 0.3965 | 3851.71 | 3850.34 | 7559.5 | 1 | 1630.5 | 30.9 | 47 | R.NSEAAMLQELNFGAYLGLPAFLPLNQEDNTNLAR.V                      |
| * | Hs293FLP_TREX_Ti_102.1    | 2.198  | 0.2868 | 1108.47 | 1109.31 | 3818.4 | 1 | 293.5  | 66.7 | 1  | R.VPLVAPEDLR.D                                              |
| * | HsF-IP-293_Ti_203.1864.18 | 1.9096 | 0.3059 | 1108.54 | 1109.31 | 3857.4 | 1 | 260.2  | 61.1 | 1  | R.VPLVAPEDLR.D                                              |
| * | HsF-IP-293-MG_Ti_103.174  | 2.4503 | 0.322  | 1108.6  | 1109.31 | 3909.3 | 4 | 295.2  | 66.7 | 3  | R.VPLVAPEDLR.D                                              |
| * | Hs293FLP-MG_Ti_203.203    | 2.2247 | 0.201  | 1108.61 | 1109.31 | 4142.6 | 1 | 315.9  | 66.7 | 2  | R.VPLVAPEDLR.D                                              |
| * | HsFLAG-Control_293_Ti_20  | 2.8853 | 0.2252 | 1108.62 | 1109.31 | 4229.6 | 1 | 450.1  | 72.2 | 2  | R.VPLVAPEDLR.D                                              |
| * | HsFLAG-Control_MG_293_    | 2.6749 | 0.2386 | 1108.65 | 1109.31 | 4345   | 2 | 374.5  | 72.2 | 2  | R.VPLVAPEDLR.D                                              |
| * | HsHeLa_Control-MG_Ti_10   | 2.234  | 0.2723 | 1108.79 | 1109.31 | 3313.3 | 9 | 199.8  | 55.6 | 2  | R.VPLVAPEDLR.D                                              |
| * | Hs293FLP-MG_Ti_103.196    | 2.5694 | 0.2286 | 1108.83 | 1109.31 | 3148.7 | 2 | 255.4  | 66.7 | 1  | R.VPLVAPEDLR.D                                              |
| * | HsFlag1P_Ti_104.2187.218  | 3.0181 | 0.2474 | 1109.04 | 1109.31 | 7428.5 | 1 | 1198.2 | 83.3 | 4  | R.VPLVAPEDLR.D                                              |
| * | HsHeLa-FLAG-IP_S100_Ti_1  | 3.5232 | 0.2959 | 1109.38 | 1109.31 | 6517.3 | 1 | 1243   | 83.3 | 17 | R.VPLVAPEDLR.D                                              |
| * | HsF-IP-293_Ti_103.1698.16 | 3.2889 | 0.2344 | 1109.4  | 1109.31 | 6780.2 | 1 | 1350   | 83.3 | 2  | R.VPLVAPEDLR.D                                              |
| * | HsFLAG-Control_293_Ti_20  | 3.4333 | 0.2528 | 1109.41 | 1109.31 | 6306.1 | 1 | 1104.8 | 77.8 | 3  | R.VPLVAPEDLR.D                                              |
| * | HsFLAG-Control_MG_293_    | 3.3966 | 0.2774 | 1109.44 | 1109.31 | 8224.2 | 1 | 1890.3 | 94.4 | 4  | R.VPLVAPEDLR.D                                              |
| * | Hs293FLP_TREX_Ti_102.1    | 3.1688 | 0.2702 | 1109.44 | 1109.31 | 6998.7 | 1 | 1108.3 | 83.3 | 3  | R.VPLVAPEDLR.D                                              |
| * | HsFLAG-Control_Hela_Ti_1  | 2.2985 | 0.2357 | 1109.45 | 1109.31 | 3770.7 | 2 | 254.7  | 66.7 | 2  | R.VPLVAPEDLR.D                                              |
| * | Hs293FLP-MG_Ti_303.161    | 2.4961 | 0.3186 | 1109.48 | 1109.31 | 3016.5 | 2 | 248.2  | 72.2 | 1  | R.VPLVAPEDLR.D                                              |
| * | Hs293FLP-MG_Ti_203.203    | 3.0776 | 0.2246 | 1109.52 | 1109.31 | 6873.4 | 1 | 1086.5 | 77.8 | 2  | R.VPLVAPEDLR.D                                              |
| * | Hs293FLP-MG_Ti_103.196    | 2.86   | 0.2403 | 1109.53 | 1109.31 | 5336.8 | 2 | 777.8  | 72.2 | 2  | R.VPLVAPEDLR.D                                              |
| * | Hs283FLP_Ti_103.1675.16   | 3.2759 | 0.2589 | 1109.7  | 1109.31 | 6126.2 | 1 | 1286.1 | 88.9 | 6  | R.VPLVAPEDLR.D                                              |
| * | HsFLAG-Control_293_Ti_10  | 3.3445 | 0.2802 | 1110.33 | 1109.31 | 7798.3 | 1 | 1615.2 | 88.9 | 4  | R.VPLVAPEDLR.D                                              |
| * | HsF-IP-293-MG_Ti_103.174  | 3.3077 | 0.2151 | 1110.44 | 1109.31 | 6579.5 | 1 | 1601.3 | 94.4 | 4  | R.VPLVAPEDLR.D                                              |
| * | HsHeLa_Control-MG_Ti_20   | 2.0132 | 0.1449 | 1110.5  | 1109.31 | 2258.1 | 3 | 130.3  | 61.1 | 1  | R.VPLVAPEDLR.D                                              |
| * | HsHeLa_Control-MG_Ti_10   | 3.1675 | 0.2568 | 1110.69 | 1109.31 | 5718.8 | 2 | 883.3  | 77.8 | 3  | R.VPLVAPEDLR.D                                              |
| * | Hs293FLP_Ti_302.1826.18   | 2.4607 | 0.2543 | 1110.83 | 1109.31 | 3120.7 | 1 | 218.8  | 66.7 | 2  | R.VPLVAPEDLR.D                                              |
| * | Hs293FLP_Ti_305.2467.24   | 5.6747 | 0.3586 | 3369.25 | 3369.62 | 6804   | 1 | 1137.6 | 31.9 | 10 | R.VPLVAPEDLRDDIENAPTTHTTEEYSGEEK.T                          |
| * | HsFLAG-Control_MG_293_    | 5.6536 | 0.4799 | 2278.63 | 2279.33 | 4817.8 | 1 | 985.6  | 60.5 | 2  | R.DDIENAPTTHTTEEYSGEEK.T                                    |
| * | Hs293FLP-MG_Ti_202.189    | 4.0991 | 0.2478 | 2279.42 | 2279.33 | 5230.9 | 4 | 809.5  | 36.8 | 1  | R.DDIENAPTTHTTEEYSGEEK.T                                    |
| * | HsFLAG-Control_293_Ti_10  | 5.4054 | 0.433  | 2279.97 | 2279.33 | 5652.8 | 1 | 1123.7 | 60.5 | 97 | R.DDIENAPTTHTTEEYSGEEK.T                                    |
| * | HsFLAG-Control_MG_293_    | 3.9849 | 0.1401 | 2281.32 | 2279.33 | 5021.4 | 1 | 1010.9 | 43.4 | 3  | R.DDIENAPTTHTTEEYSGEEK.T                                    |
| * | Hs293FLP-MG_Ti_303.142    | 4.5343 | 0.3684 | 2282.16 | 2279.33 | 4428.3 | 1 | 931    | 60.5 | 1  | R.DDIENAPTTHTTEEYSGEEK.T                                    |
| * | HsHeLa_Control-MG_Ti_10   | 2.6985 | 0.3246 | 1364.73 | 1364.57 | 5764.1 | 1 | 821.8  | 81.2 | 1  | K.TMWWWHNFR.T                                               |
| * | HsHeLa_Control-MG_Ti_20   | 4.4653 | 0.1854 | 2160.89 | 2160.48 | 5636   | 1 | 1025.1 | 40.8 | 5  | K.RIAVALEIGADLPSNHVIDR.W                                    |
| * | HsFLAG-Control_293_Ti_10  | 5.014  | 0.2404 | 2003.4  | 2004.29 | 8051.3 | 2 | 1872.4 | 43.1 | 6  | R.IAVALAIGADLPSNHVIDR.W                                     |
| * | HsFLAG-Control_293_Ti_10  | 5.4232 | 0.363  | 2003.98 | 2004.29 | 8000.7 | 1 | 2004.3 | 69.4 | 51 | R.IAVALAIGADLPSNHVIDR.W                                     |
| * | Hs293FLP-MG_Ti_203.527    | 4.7032 | 0.1495 | 2004.76 | 2004.29 | 7750.3 | 6 | 1628.4 | 41.7 | 6  | R.IAVALAIGADLPSNHVIDR.W                                     |
| * | Hs283FLP_Ti_106.2355.23   | 5.418  | 0.4088 | 2004.79 | 2004.29 | 6096.4 | 1 | 1370.3 | 63.9 | 5  | R.IAVALAIGADLPSNHVIDR.W                                     |
| * | HsHeLa_Control-MG_Ti_20   | 4.4978 | 0.2469 | 2004.94 | 2004.29 | 7382.3 | 1 | 2038.5 | 47.2 | 6  | R.IAVALAIGADLPSNHVIDR.W                                     |
| * | HsF-IP-293-MG_Ti_106.257  | 5.6778 | 0.4361 | 2005.79 | 2004.29 | 5576.8 | 1 | 1265.4 | 63.9 | 33 | R.IAVALAIGADLPSNHVIDR.W                                     |
| * | Hs293FLP_Ti_305.2482.24   | 4.8741 | 0.2224 | 2006.2  | 2004.29 | 7133.8 | 5 | 1790.2 | 44.4 | 3  | R.IAVALAIGADLPSNHVIDR.W                                     |
| * | HsHeLa_Control-MG_Ti_20   | 4.8381 | 0.3558 | 2006.31 | 2004.29 | 6949.1 | 1 | 1321.8 | 61.1 | 26 | R.IAVALAIGADLPSNHVIDR.W                                     |
| * | HsF-IP-293-MG_Ti_103.263  | 4.1539 | 0.4045 | 1388.3  | 1389.68 | 3161.4 | 1 | 883.3  | 83.3 | 34 | K.AAILPTSIFLTNK.K                                           |
| * | HsFLAG-Control_Hela_Ti_1  | 2.3892 | 0.3618 | 1388.43 | 1389.68 | 7015.7 | 1 | 639.5  | 58.3 | 1  | K.AAILPTSIFLTNK.K                                           |

|   |                          |        |        |         |         |        |   |        |      |                                       |
|---|--------------------------|--------|--------|---------|---------|--------|---|--------|------|---------------------------------------|
| * | HsHeLa_Control-MG_Ti_20  | 2.5492 | 0.3214 | 1388.63 | 1389.68 | 5499.8 | 1 | 341.4  | 50   | 2 K.AAILPTSIFLTNK.K                   |
| * | HsF-IP-293-MG_Ti_103.258 | 1.978  | 0.2638 | 1388.64 | 1389.68 | 5358.4 | 1 | 421.6  | 54.2 | 2 K.AAILPTSIFLTNK.K                   |
| * | HsHeLa_Control_Ti_104.34 | 2.2752 | 0.1538 | 1388.8  | 1389.68 | 5080.8 | 2 | 274.6  | 45.8 | 1 K.AAILPTSIFLTNK.K                   |
| * | Hs293FLP_Ti_304.2829.28  | 2.2217 | 0.2821 | 1388.8  | 1389.68 | 5331.5 | 1 | 446.2  | 54.2 | 2 K.AAILPTSIFLTNK.K                   |
| * | HsHeLa-FLAG-IP_S100_Ti_  | 2.1511 | 0.2487 | 1388.83 | 1389.68 | 7377.9 | 1 | 528.7  | 54.2 | 1 K.AAILPTSIFLTNK.K                   |
| * | HsHeLa_Control_Ti_104.34 | 3.8316 | 0.3117 | 1389.4  | 1389.68 | 3248.8 | 1 | 638.8  | 75   | 3 K.AAILPTSIFLTNK.K                   |
| * | HsFlag1P_Ti_106.2828.282 | 4.0652 | 0.3943 | 1389.41 | 1389.68 | 3233   | 1 | 861.8  | 83.3 | 2 K.AAILPTSIFLTNK.K                   |
| * | HsFLAG-Control_293_Ti_2( | 2.8431 | 0.3204 | 1389.49 | 1389.68 | 7181.4 | 1 | 656.2  | 58.3 | 6 K.AAILPTSIFLTNK.K                   |
| * | HsFLAG-Control_HeLa_S1(  | 4.2497 | 0.4033 | 1389.51 | 1389.68 | 3095.1 | 1 | 757    | 83.3 | 17 K.AAILPTSIFLTNK.K                  |
| * | Hs293FLP-MG_Ti_204.314   | 4.1984 | 0.4206 | 1389.55 | 1389.68 | 3354.7 | 1 | 732.9  | 79.2 | 7 K.AAILPTSIFLTNK.K                   |
| * | HsFLAG-Control_Hela_Ti_1 | 4.0233 | 0.3455 | 1389.56 | 1389.68 | 3296.4 | 1 | 854.3  | 83.3 | 5 K.AAILPTSIFLTNK.K                   |
| * | Hs293FLP-MG_Ti_203.322   | 2.6651 | 0.3623 | 1389.63 | 1389.68 | 6492   | 1 | 456.7  | 54.2 | 1 K.AAILPTSIFLTNK.K                   |
| * | HsFLAG-Control_293_Ti_1( | 2.4494 | 0.3369 | 1389.75 | 1389.68 | 7548   | 1 | 516.9  | 54.2 | 4 K.AAILPTSIFLTNK.K                   |
| * | HsFLAG-Control_293_Ti_1( | 4.1074 | 0.3361 | 1390.05 | 1389.68 | 3914.3 | 1 | 883.2  | 79.2 | 6 K.AAILPTSIFLTNK.K                   |
| * | Hs293FLP_Ti_304.2825.28  | 3.8537 | 0.3951 | 1390.15 | 1389.68 | 2806.2 | 1 | 687    | 79.2 | 9 K.AAILPTSIFLTNK.K                   |
| * | HsFLAG-Control_293_Ti_2( | 4.3207 | 0.3987 | 1390.68 | 1389.68 | 4459.4 | 1 | 1004.7 | 79.2 | 70 K.AAILPTSIFLTNK.K                  |
| * | HsHeLa_Control-MG_Ti_20  | 4.0939 | 0.3621 | 1390.97 | 1389.68 | 3540.8 | 1 | 819.2  | 79.2 | 22 K.AAILPTSIFLTNK.K                  |
| * | HsHeLa_Control-MG_Ti_20  | 2.9322 | 0.2677 | 1516.64 | 1517.85 | 4474   | 3 | 353.3  | 53.8 | 2 K.AAILPTSIFLTNKK.G                  |
| * | HsF-IP-293-MG_Ti_106.237 | 3.0644 | 0.2403 | 1517.65 | 1517.85 | 4904.1 | 8 | 305.4  | 50   | 2 K.AAILPTSIFLTNKK.G                  |
| * | HsFLAG-Control_HeLa_S1(  | 3.0982 | 0.3536 | 1517.7  | 1517.85 | 3653.7 | 1 | 447.4  | 61.5 | 3 K.AAILPTSIFLTNKK.G                  |
| * | Hs293FLP_Ti_306.2827.28  | 2.7355 | 0.0899 | 1518.95 | 1517.85 | 4659.2 | 6 | 308.9  | 50   | 1 K.AAILPTSIFLTNKK.G                  |
| * | Hs293FLP_Ti_305.2401.24  | 2.8358 | 0.3104 | 1520.49 | 1517.85 | 3310.4 | 2 | 298.7  | 57.7 | 1 K.AAILPTSIFLTNKK.G                  |
| * | HsHeLa_Control-MG_Ti_20  | 3.6009 | 0.2589 | 1520.61 | 1517.85 | 3711   | 1 | 537    | 69.2 | 2 K.AAILPTSIFLTNKK.G                  |
| * | Hs293FLP_Ti_306.2376.23  | 2.0561 | 0.1153 | 874.86  | 876.087 | 3510.9 | 3 | 454.5  | 71.4 | 1 K.KGFPVLSK.M                        |
| * | HsF-IP-293_Ti_206.2158.2 | 1.9683 | 0.1441 | 875.4   | 876.087 | 3160.2 | 4 | 411.9  | 71.4 | 2 K.KGFPVLSK.M                        |
| * | HsHeLa_Control-MG_Ti_20  | 1.8244 | 0.1604 | 875.42  | 876.087 | 2934.9 | 7 | 290    | 64.3 | 1 K.KGFPVLSK.M                        |
| * | HsFLAG-Control_MG_293_   | 2.2148 | 0.1259 | 875.54  | 876.087 | 3762.5 | 3 | 467    | 71.4 | 1 K.KGFPVLSK.M                        |
| * | Hs293FLP-MG_Ti_206.261   | 1.8398 | 0.1513 | 875.57  | 876.087 | 4553.6 | 1 | 489.5  | 71.4 | 1 K.KGFPVLSK.M                        |
| * | HsFLAG-Control_293_Ti_2( | 2.1047 | 0.1681 | 875.58  | 876.087 | 3685.3 | 3 | 452.5  | 71.4 | 2 K.KGFPVLSK.M                        |
| * | Hs293FLP-MG_Ti_306.233   | 2.0188 | 0.1253 | 875.66  | 876.087 | 3493.1 | 2 | 429.5  | 71.4 | 2 K.KGFPVLSK.M                        |
| * | Hs283FLP_Ti_106.1991.19  | 2.0726 | 0.1207 | 875.67  | 876.087 | 3720.1 | 4 | 439.1  | 71.4 | 2 K.KGFPVLSK.M                        |
| * | HsHeLa_Control_Ti_106.27 | 2.4284 | 0.2036 | 875.88  | 876.087 | 3248.6 | 2 | 438.6  | 71.4 | 2 K.KGFPVLSK.M                        |
| * | HsHeLa_Control-MG_Ti_10  | 2.4254 | 0.1739 | 875.88  | 876.087 | 4025.3 | 5 | 456.8  | 71.4 | 3 K.KGFPVLSK.M                        |
| * | HsHeLa_Control-MG_Ti_20  | 3.2931 | 0.0976 | 876.23  | 876.087 | 4023.4 | 1 | 951.1  | 100  | 3 K.KGFPVLSK.M                        |
| * | HsFLAG-Control_MG_293_   | 3.1681 | 0.1046 | 876.32  | 876.087 | 4460.5 | 3 | 794.3  | 92.9 | 2 K.KGFPVLSK.M                        |
| * | HsFLAG-Control_293_Ti_2( | 3.2571 | 0.1165 | 876.32  | 876.087 | 3999.3 | 1 | 909    | 100  | 4 K.KGFPVLSK.M                        |
| * | HsHeLa_Control_Ti_106.27 | 3.0887 | 0.1012 | 876.36  | 876.087 | 3153.8 | 3 | 790.3  | 100  | 2 K.KGFPVLSK.M                        |
| * | HsF-IP-293_Ti_206.2159.2 | 3.2964 | 0.1038 | 876.36  | 876.087 | 3296.5 | 1 | 809.9  | 100  | 2 K.KGFPVLSK.M                        |
| * | Hs283FLP_Ti_106.1989.19  | 3.0123 | 0.1067 | 876.4   | 876.087 | 3318.8 | 1 | 691.5  | 92.9 | 1 K.KGFPVLSK.M                        |
| * | Hs293FLP-MG_Ti_206.261   | 3.0197 | 0.0987 | 876.49  | 876.087 | 4019.5 | 1 | 827.1  | 100  | 1 K.KGFPVLSK.M                        |
| * | HsHeLa_Control-MG_Ti_10  | 3.0852 | 0.0979 | 876.57  | 876.087 | 3092.1 | 1 | 835.5  | 100  | 2 K.KGFPVLSK.M                        |
| * | Hs293FLP_Ti_306.2379.23  | 3.2286 | 0.0915 | 876.8   | 876.087 | 3413.2 | 3 | 834.9  | 100  | 3 K.KGFPVLSK.M                        |
| * | Hs293FLP-MG_Ti_203.189   | 2.0294 | 0.0982 | 747.53  | 747.913 | 3241.3 | 4 | 379.1  | 75   | 2 K.GFPVLSK.M                         |
| * | HsHeLa_Control-MG_Ti_20  | 4.1801 | 0.2743 | 1855.11 | 1854.07 | 9829.9 | 6 | 749.8  | 50   | 7 K.LEVQFIITGTNHHSEK.E                |
| * | Hs293FLP-MG_Ti_205.403   | 5.795  | 0.4932 | 3343.9  | 3342.7  | 7511.6 | 1 | 723.7  | 26.9 | 53 K.EFCSYLQYLEYLSQNRPPPNAYELFAK.G    |
| * | HsFLAG-Control_293_Ti_2( | 5.2303 | 0.3998 | 3238.22 | 3238.55 | 8799.5 | 1 | 757.9  | 28.8 | 8 K.GYEDYLSQPLQLMDNLESQTYEVFEK.D      |
| * | Hs293FLP-MG_Ti_203.514   | 4.8306 | 0.2984 | 3690.57 | 3692.09 | 4931   | 1 | 585.7  | 26.7 | 4 K.GYEDYLSQPLQLMDNLESQTYEVFEKDIPIK.Y |
| * | HsHeLa_Control-MG_Ti_20  | 4.4715 | 0.3374 | 1744.88 | 1745.97 | 4471.2 | 1 | 782.7  | 76.9 | 6 K.DPIKYSQYQQAIYK.C                  |
| * | Hs293FLP-MG_Ti_302.135   | 3.0812 | 0.1932 | 1291.29 | 1292.43 | 7985.5 | 1 | 759.2  | 72.2 | 1 K.YSQYQQAIYK.C                      |

|   |                          |        |        |         |         |         |   |        |      |     |                                          |
|---|--------------------------|--------|--------|---------|---------|---------|---|--------|------|-----|------------------------------------------|
| * | HsFLAG-Control_293_Ti_20 | 2.7868 | 0.1666 | 1291.34 | 1292.43 | 9558.6  | 4 | 695.5  | 66.7 | 2   | K.YSQYQQAIYK.C                           |
| * | Hs293FLP_TREX_Ti_102.1   | 2.9034 | 0.1568 | 1291.39 | 1292.43 | 9758.5  | 1 | 1072.5 | 77.8 | 1   | K.YSQYQQAIYK.C                           |
| * | HsFLAG-Control_MG_293_   | 2.9198 | 0.0964 | 1291.39 | 1292.43 | 9874    | 7 | 742.1  | 66.7 | 2   | K.YSQYQQAIYK.C                           |
| * | HsF-IP-293-MG_Ti_102.149 | 3.0123 | 0.162  | 1291.4  | 1292.43 | 8586.4  | 8 | 620.1  | 66.7 | 2   | K.YSQYQQAIYK.C                           |
| * | HsFLAG-Control_293_Ti_10 | 2.4763 | 0.1621 | 1291.48 | 1292.43 | 8587.3  | 1 | 654.1  | 66.7 | 1   | K.YSQYQQAIYK.C                           |
| * | Hs293FLP-MG_Ti_202.181   | 3.3002 | 0.2631 | 1291.51 | 1292.43 | 8856.3  | 2 | 848.2  | 72.2 | 2   | K.YSQYQQAIYK.C                           |
| * | HsHeLa_Control-MG_Ti_10  | 2.7757 | 0.2108 | 1291.69 | 1292.43 | 7891.5  | 1 | 738.1  | 72.2 | 1   | K.YSQYQQAIYK.C                           |
| * | HsFLAG-Control_HeLa_S10  | 2.6849 | 0.2141 | 1291.84 | 1292.43 | 10039.7 | 1 | 738.9  | 66.7 | 3   | K.YSQYQQAIYK.C                           |
| * | HsFLAG-Control_293_Ti_20 | 3.8627 | 0.2582 | 1292.09 | 1292.43 | 6940.2  | 1 | 1365.8 | 88.9 | 3   | K.YSQYQQAIYK.C                           |
| * | HsHeLa_Control-MG_Ti_20  | 3.9965 | 0.2813 | 1292.17 | 1292.43 | 7213.4  | 1 | 1408.5 | 88.9 | 7   | K.YSQYQQAIYK.C                           |
| * | HsFLAG-Control_HeLa_S10  | 3.817  | 0.2602 | 1292.25 | 1292.43 | 7743.8  | 1 | 1355.2 | 88.9 | 3   | K.YSQYQQAIYK.C                           |
| * | Hs293FLP-MG_Ti_202.182   | 3.8954 | 0.2108 | 1292.39 | 1292.43 | 6824    | 1 | 1252.4 | 88.9 | 3   | K.YSQYQQAIYK.C                           |
| * | HsFLAG-Control_293_Ti_10 | 3.6182 | 0.3045 | 1292.39 | 1292.43 | 7172    | 1 | 1331.9 | 88.9 | 2   | K.YSQYQQAIYK.C                           |
| * | Hs293FLP-MG_Ti_302.135   | 3.4723 | 0.2277 | 1292.48 | 1292.43 | 5934.5  | 1 | 1134.9 | 88.9 | 1   | K.YSQYQQAIYK.C                           |
| * | HsFLAG-Control_Hela_Ti_1 | 3.1911 | 0.2357 | 1292.5  | 1292.43 | 8651.9  | 1 | 982    | 77.8 | 1   | K.YSQYQQAIYK.C                           |
| * | HsHeLa_Control-MG_Ti_20  | 2.8473 | 0.1677 | 1292.5  | 1292.43 | 7023.7  | 1 | 698    | 72.2 | 2   | K.YSQYQQAIYK.C                           |
| * | HsHelaFlag1P_Ti_102.147  | 3.086  | 0.2591 | 1292.87 | 1292.43 | 5077.5  | 1 | 931.1  | 88.9 | 2   | K.YSQYQQAIYK.C                           |
| * | HsHeLa_Control-MG_Ti_10  | 3.749  | 0.2948 | 1293.02 | 1292.43 | 6394    | 1 | 1268   | 88.9 | 4   | K.YSQYQQAIYK.C                           |
| * | HsFLAG-Control_MG_293_   | 3.8109 | 0.2533 | 1293.47 | 1292.43 | 6925.3  | 1 | 1252.2 | 88.9 | 2   | K.YSQYQQAIYK.C                           |
| * | Hs293FLP_Ti_302.1496.14  | 3.426  | 0.2723 | 1293.66 | 1292.43 | 6148.9  | 1 | 1163.8 | 88.9 | 2   | K.YSQYQQAIYK.C                           |
| * | Hs293FLP-MG_Ti_102.165   | 3.8265 | 0.2605 | 1293.8  | 1292.43 | 5696.5  | 1 | 1112.1 | 88.9 | 4   | K.YSQYQQAIYK.C                           |
| * | HsFLAG-Control_HeLa_NE   | 3.6841 | 0.3521 | 1294.06 | 1292.43 | 7696.8  | 1 | 1338.9 | 88.9 | 22  | K.YSQYQQAIYK.C                           |
| * | HsFLAG-Control_293_Ti_10 | 4.2991 | 0.1467 | 1388.2  | 1388.53 | 6562.3  | 3 | 1383.9 | 85   | 42  | K.CLLDRVPEEEK.D                          |
| * | Hs293FLP-MG_Ti_204.323   | 5.4671 | 0.336  | 2843.96 | 2843.23 | 9079    | 1 | 983.7  | 29.2 | 11  | K.CLLDRVPEEEKDTNVQVLMVLGAGR.G            |
| * | HsHeLa_Control-MG_Ti_10  | 2.9192 | 0.2186 | 2185.4  | 2185.5  | 7019    | 1 | 532.7  | 44.7 | 1   | R.VPEEEKDTNVQVLMVLGAGR.G                 |
| * | HsF-IP-293_Ti_206.2504.2 | 3.6218 | 0.3273 | 1472.52 | 1473.73 | 3958.6  | 1 | 318.4  | 57.7 | 1   | K.DTNVQVLMVLGAGR.G                       |
| * | HsFLAG-Control_293_Ti_20 | 3.2577 | 0.3519 | 1472.58 | 1473.73 | 4002.7  | 1 | 376.8  | 61.5 | 1   | K.DTNVQVLMVLGAGR.G                       |
| * | Hs293FLP_Ti_302.2863.28  | 5.2146 | 0.3683 | 1472.72 | 1473.73 | 6524.8  | 1 | 1989.1 | 84.6 | 12  | K.DTNVQVLMVLGAGR.G                       |
| * | HsF-IP-293-MG_Ti_104.25  | 5.1166 | 0.4174 | 1473.3  | 1473.73 | 6914.2  | 1 | 1639.4 | 80.8 | 40  | K.DTNVQVLMVLGAGR.G                       |
| * | HsHeLa_Control-MG_Ti_20  | 4.6194 | 0.3801 | 1473.36 | 1473.73 | 8064.4  | 1 | 2186.2 | 80.8 | 2   | K.DTNVQVLMVLGAGR.G                       |
| * | HsFLAG-Control_HeLa_S10  | 2.2063 | 0.1701 | 926.52  | 927.092 | 3556.8  | 3 | 230.4  | 75   | 1   | R.GPLVNASLR.A                            |
| * | HsFLAG-Control_HeLa_S10  | 3.1189 | 0.2736 | 927.3   | 927.092 | 5117.6  | 2 | 1000.5 | 87.5 | 6   | R.GPLVNASLR.A                            |
| * | Hs293FLP-MG_Ti_204.165   | 3.3187 | 0.2773 | 927.39  | 927.092 | 4857.1  | 4 | 807    | 81.2 | 31  | R.GPLVNASLR.A                            |
| * | HsFLAG-Control_293_Ti_10 | 1.9513 | 0.1931 | 858.49  | 858.969 | 3377.7  | 8 | 276.7  | 83.3 | 2   | R.EWVAPEK.A                              |
|   |                          |        |        |         |         |         |   |        |      |     | R.EWVAPEKADIIVSELLGSFADNELSPECLDGAQHFLK. |
| * | HsHeLa_Control-MG_Ti_10  | 4.2729 | 0.2038 | 4131.37 | 4130.56 | 5762    | 1 | 497.9  | 21.5 | 1   | D                                        |
| * | HsHeLa_Control-MG_Ti_20  | 6.112  | 0.4032 | 3289.45 | 3290.62 | 6778.1  | 1 | 1194.8 | 32.8 | 103 | K.ADIIVSELLGSFADNELSPECLDGAQHFLK.D       |
| * | HsHeLa-FLAG-IP_S100_Ti_  | 4.7584 | 0.5291 | 2173.47 | 2171.37 | 3808.2  | 1 | 658.1  | 57.5 | 113 | K.DDGVSIPGEYTSFLAPISSSK.L                |
| * | HsFlag1P_Ti_103.2505.250 | 3.0279 | 0.1609 | 2109.68 | 2110.35 | 5689.6  | 3 | 415.7  | 50   | 2   | R.EKDRDPEAQFEMPYVVR.L                    |
| * | Hs293FLP-MG_Ti_203.253   | 4.1426 | 0.3606 | 1852.46 | 1853.06 | 5656.9  | 1 | 793.4  | 67.9 | 2   | K.DRDPEAQFEMPYVVR.L                      |
| * | HsF-IP-293_Ti_206.2366.2 | 3.996  | 0.2957 | 1852.62 | 1853.06 | 5209.2  | 1 | 815    | 67.9 | 2   | K.DRDPEAQFEMPYVVR.L                      |
| * | Hs293FLP-MG_Ti_306.252   | 3.7747 | 0.3117 | 1852.65 | 1853.06 | 4732.1  | 1 | 660.2  | 64.3 | 2   | K.DRDPEAQFEMPYVVR.L                      |
| * | Hs293FLP-MG_Ti_203.254   | 3.8113 | 0.1445 | 1852.7  | 1853.06 | 5401.7  | 1 | 1056.5 | 48.2 | 1   | K.DRDPEAQFEMPYVVR.L                      |
| * | HsHeLa_Control-MG_Ti_10  | 4.0584 | 0.3554 | 1853.04 | 1853.06 | 4992.1  | 1 | 770.2  | 67.9 | 6   | K.DRDPEAQFEMPYVVR.L                      |
| * | HsHeLa_Control-MG_Ti_20  | 4.3383 | 0.1715 | 1853.05 | 1853.06 | 8070.7  | 5 | 1307.2 | 44.6 | 1   | K.DRDPEAQFEMPYVVR.L                      |
| * | HsF-IP-293_Ti_206.2379.2 | 3.9201 | 0.0917 | 1853.06 | 1853.06 | 6107.5  | 1 | 1362.9 | 51.8 | 1   | K.DRDPEAQFEMPYVVR.L                      |
| * | HsHeLa_Control-MG_Ti_10  | 4.0857 | 0.1115 | 1853.48 | 1853.06 | 5072.6  | 1 | 1305.4 | 53.6 | 2   | K.DRDPEAQFEMPYVVR.L                      |
| * | HsHeLa_Control-MG_Ti_20  | 3.9313 | 0.3333 | 1853.56 | 1853.06 | 5292.4  | 1 | 844.5  | 67.9 | 3   | K.DRDPEAQFEMPYVVR.L                      |
| * | Hs293FLP_Ti_302.2490.24  | 4.4171 | 0.3103 | 1853.99 | 1853.06 | 4804.3  | 1 | 796    | 71.4 | 48  | K.DRDPEAQFEMPYVVR.L                      |

|                    |                          |        |        |         |         |        |     |                                   |      |     |                                      |
|--------------------|--------------------------|--------|--------|---------|---------|--------|-----|-----------------------------------|------|-----|--------------------------------------|
| *                  | HsF-IP-293-MG_Ti_105.29f | 4.2399 | 0.1602 | 1854.53 | 1853.06 | 7466   | 1   | 1618.8                            | 53.6 | 4   | K.DRDPEAQFEMPYVVR.L                  |
| *                  | HsFLAG-Control_293_Ti_2( | 3.0653 | 0.2298 | 1580.64 | 1581.78 | 10996  | 3   | 814.6                             | 50   | 1   | R.DPEAQFEMPYVVR.L                    |
| *                  | Hs293FLP-MG_Ti_206.303:  | 2.998  | 0.2467 | 2543.77 | 2543.85 | 6806.7 | 1   | 429.2                             | 38.1 | 1   | K.KVWYEWAVTAPVCSAIHNPTGR.S           |
| *                  | Hs293FLP_Ti_306.2858.28: | 4.7647 | 0.4139 | 2544.16 | 2543.85 | 4740.3 | 1   | 1053.2                            | 59.5 | 4   | K.KVWYEWAVTAPVCSAIHNPTGR.S           |
| *                  | HsHeLa_Control-MG_Ti_10  | 5.0151 | 0.3899 | 2544.38 | 2543.85 | 4972.9 | 1   | 1152.5                            | 61.9 | 2   | K.KVWYEWAVTAPVCSAIHNPTGR.S           |
| *                  | Hs293FLP_Ti_306.2856.28: | 4.8388 | 0.3042 | 2544.43 | 2543.85 | 8344.7 | 1   | 1882.7                            | 39.3 | 2   | K.KVWYEWAVTAPVCSAIHNPTGR.S           |
| *                  | HsHeLa_Control-MG_Ti_10  | 5.3141 | 0.2506 | 2544.54 | 2543.85 | 8112.4 | 1   | 1970                              | 40.5 | 1   | K.KVWYEWAVTAPVCSAIHNPTGR.S           |
| *                  | HsFLAG-Control_293_Ti_1( | 4.4129 | 0.4244 | 2413.78 | 2415.68 | 4942.7 | 1   | 819.6                             | 55   | 7   | K.VWYEWAVTAPVCSAIHNPTGR.S            |
| *                  | Hs293FLP-MG_Ti_205.302:  | 3.5923 | 0.1879 | 2414.83 | 2415.68 | 6285.2 | 1   | 1064.2                            | 36.2 | 2   | K.VWYEWAVTAPVCSAIHNPTGR.S            |
| *                  | HsHeLa_Control-MG_Ti_20  | 4.7415 | 0.4154 | 2415.36 | 2415.68 | 5164.8 | 1   | 693                               | 52.5 | 17  | K.VWYEWAVTAPVCSAIHNPTGR.S            |
| *                  | HsFLAG-Control_293_Ti_1( | 3.9845 | 0.2774 | 2416.43 | 2415.68 | 8358.1 | 1   | 1307.5                            | 35   | 1   | K.VWYEWAVTAPVCSAIHNPTGR.S            |
| *                  | Hs293FLP-MG_Ti_205.302:  | 4.2435 | 0.3895 | 2416.44 | 2415.68 | 5849.6 | 1   | 697.8                             | 47.5 | 5   | K.VWYEWAVTAPVCSAIHNPTGR.S            |
| *                  | HsHeLa_Control-MG_Ti_20  | 4.4578 | 0.2642 | 2416.68 | 2415.68 | 6370.2 | 1   | 1014.6                            | 35   | 2   | K.VWYEWAVTAPVCSAIHNPTGR.S            |
| gij 17986283 ref N |                          | 39     | 745    | 0.641   | 451     | 50136  | 5.1 | U tubulin, alpha 3 [Homo sapiens] |      |     |                                      |
|                    | HsFLAG-Control_HeLa_S1(  | 5.6931 | 0.4653 | 2009.21 | 2009.09 | 9324.1 | 1   | 1749.3                            | 63.2 | 204 | K.TIGGGDDSFNTFFSETGAGK.H             |
|                    | HsF-IP-293-MG_Ti_102.27i | 5.0334 | 0.4399 | 1702.32 | 1702.95 | 4530   | 1   | 1284.8                            | 82.1 | 22  | R.AVFVDLEPTVIDEVR.T                  |
|                    | HsFLAG-Control_HeLa_S1(  | 4.9427 | 0.335  | 1702.54 | 1702.95 | 7851   | 1   | 1529.4                            | 50   | 5   | R.AVFVDLEPTVIDEVR.T                  |
|                    | HsFLAG-Control_HeLa_S1(  | 4.0389 | 0.2932 | 1703.03 | 1702.95 | 8687.1 | 1   | 1386.4                            | 46.4 | 2   | R.AVFVDLEPTVIDEVR.T                  |
|                    | HsHeLa-FLAG-IP_S100_Ti   | 5.2915 | 0.4169 | 1703.58 | 1702.95 | 4669.1 | 1   | 1294.9                            | 82.1 | 56  | R.AVFVDLEPTVIDEVR.T                  |
|                    | HsFLAG-Control_HeLa_S1(  | 4.7409 | 0.3371 | 1703.91 | 1702.95 | 5321.1 | 1   | 1259.1                            | 78.6 | 16  | R.AVFVDLEPTVIDEVR.T                  |
|                    | HsFLAG-Control_HeLa_NE   | 4.1691 | 0.3052 | 1704.24 | 1702.95 | 8886.6 | 1   | 1330.2                            | 44.6 | 1   | R.AVFVDLEPTVIDEVR.T                  |
|                    | HsHeLa_Control_Ti_102.30 | 5.091  | 0.2766 | 1704.76 | 1702.95 | 4122.7 | 1   | 1098.9                            | 82.1 | 19  | R.AVFVDLEPTVIDEVR.T                  |
|                    | HsFLAG-Control_HeLa_S1(  | 4.2449 | 0.3005 | 2415.72 | 2416.66 | 8163.2 | 1   | 1212.2                            | 36.2 | 4   | R.QLFHPEQLITGKEDAANNYAR.G            |
|                    | HsHeLa_Control-MG_Ti_10  | 3.4137 | 0.2652 | 2416.42 | 2416.66 | 7726.4 | 1   | 627.9                             | 45   | 8   | R.QLFHPEQLITGKEDAANNYAR.G            |
|                    | HsGST-MOCK_Ti_103.173i   | 4.1081 | 0.2897 | 2416.8  | 2416.66 | 6806.6 | 1   | 1048.6                            | 36.2 | 1   | R.QLFHPEQLITGKEDAANNYAR.G            |
|                    | HsFLAG-Control_HeLa_NE   | 3.5321 | 0.3633 | 2417.37 | 2416.66 | 8286.1 | 1   | 502                               | 42.5 | 3   | R.QLFHPEQLITGKEDAANNYAR.G            |
|                    | HsFLAG-Control_HeLa_S1(  | 3.3565 | 0.0828 | 1086.26 | 1086.27 | 6338.4 | 2   | 941.8                             | 87.5 | 18  | K.EIIDLVLDLDR.I                      |
|                    | Hs293FLP-MG_Ti_206.350:  | 4.9972 | 0.3758 | 3392.79 | 3392.78 | 9865.2 | 1   | 1364.1                            | 27.4 | 5   | K.LADQCTGLQGFLVFHSFGGGTSGSFTSLLMER.L |
|                    | HsFLAG-Control_MG_293    | 3.4903 | 0.1725 | 1719.53 | 1719.9  | 7713.5 | 1   | 803                               | 61.5 | 17  | R.NLDIERPTYTNLNR.L                   |
|                    | HsFLAG-Control_HeLa_NE   | 5.8208 | 0.383  | 2410.89 | 2410.69 | 6224.2 | 1   | 1491.8                            | 62.5 | 149 | R.FDGALNVDLTFEQTNLVPYPR.I            |
|                    | HsFLAG-Control_HeLa_S1(  | 3.7053 | 0.2052 | 1757.29 | 1758.07 | 4837.7 | 5   | 804.3                             | 45   | 1   | R.IHFPLATYAPVISAEEK.A                |
|                    | HsFLAG-Control_HeLa_NE   | 4.2732 | 0.3578 | 1757.6  | 1758.07 | 4681.9 | 1   | 893.2                             | 70   | 13  | R.IHFPLATYAPVISAEEK.A                |
|                    | HsHeLa_Control-MG_Ti_20  | 4.3621 | 0.4339 | 1757.74 | 1758.07 | 4584.4 | 1   | 1152                              | 76.7 | 16  | R.IHFPLATYAPVISAEEK.A                |
|                    | HsFLAG-Control_HeLa_S1(  | 4.2526 | 0.2613 | 1757.75 | 1758.07 | 5170.2 | 2   | 1162.9                            | 48.3 | 1   | R.IHFPLATYAPVISAEEK.A                |
|                    | HsFLAG-Control_HeLa_S1(  | 4.411  | 0.4766 | 1758.41 | 1758.07 | 4071.6 | 1   | 935.5                             | 73.3 | 3   | R.IHFPLATYAPVISAEEK.A                |
|                    | HsHeLa_Control-MG_Ti_10  | 4.4041 | 0.3426 | 2753.23 | 2752.04 | 7001.1 | 1   | 1357.7                            | 52.2 | 2   | K.AYHEQLSVAEITNACFEPANQMVK.C         |
|                    | Hs293FLP-MG_Ti_103.214i  | 3.0177 | 0.1953 | 1251.47 | 1250.43 | 4064.5 | 1   | 618.2                             | 81.2 | 2   | K.YMACCLLYR.G                        |
|                    | HsFLAG-Control_HeLa_S1(  | 2.3439 | 0.2742 | 1015.45 | 1016.18 | 7798   | 1   | 652.7                             | 72.2 | 2   | K.DVNAAIATIK.T                       |
|                    | HsFLAG-Control_293_Ti_2( | 2.4919 | 0.2722 | 1015.46 | 1016.18 | 6406.7 | 1   | 644.8                             | 77.8 | 4   | K.DVNAAIATIK.T                       |
|                    | HsFLAG-Control_HeLa_S1(  | 2.1932 | 0.1673 | 1015.48 | 1016.18 | 6826.5 | 6   | 502                               | 66.7 | 1   | K.DVNAAIATIK.T                       |
|                    | HsHeLa_Control_Ti_102.17 | 2.4787 | 0.2338 | 1015.71 | 1016.18 | 5846.2 | 1   | 557.5                             | 77.8 | 3   | K.DVNAAIATIK.T                       |
|                    | HsFLAG-Control_HeLa_S1(  | 3.6128 | 0.2873 | 1016.27 | 1016.18 | 5362.6 | 1   | 1163.9                            | 88.9 | 1   | K.DVNAAIATIK.T                       |
|                    | HsFLAG-Control_HeLa_S1(  | 3.5311 | 0.2771 | 1016.35 | 1016.18 | 5480.7 | 1   | 1193.4                            | 88.9 | 2   | K.DVNAAIATIK.T                       |
|                    | HsFLAG-Control_HeLa_S1(  | 3.5176 | 0.2784 | 1016.38 | 1016.18 | 5208.6 | 1   | 1029                              | 83.3 | 1   | K.DVNAAIATIK.T                       |
|                    | HsHeLa-FLAG-IP_S100_Ti   | 3.4285 | 0.2973 | 1016.56 | 1016.18 | 5657.7 | 1   | 925.2                             | 77.8 | 12  | K.DVNAAIATIK.T                       |
|                    | HsFLAG-Control_HeLa_S1(  | 2.1618 | 0.2038 | 1017.63 | 1016.18 | 6803   | 6   | 446.1                             | 66.7 | 2   | K.DVNAAIATIK.T                       |
|                    | HsHeLa_Control-MG_Ti_20  | 3.7919 | 0.422  | 1755.69 | 1755.98 | 6153.4 | 1   | 806.5                             | 65.4 | 7   | K.RTIQFVDWCPTGFK.V                   |
|                    | HsFLAG-Control_HeLa_S1(  | 4.5938 | 0.4395 | 1599.28 | 1599.79 | 7004.1 | 1   | 1203.6                            | 75   | 4   | R.TIQFVDWCPTGFK.V                    |
|                    | HsHeLa-FLAG-IP_S100_Ti   | 4.1491 | 0.409  | 1825.53 | 1826.1  | 3764.8 | 1   | 755.9                             | 64.7 | 121 | K.VGINYQPPTVVPGGDLAK.V               |

|                   |                          |        |        |         |         |         |     |        |                                                     |     |                            |
|-------------------|--------------------------|--------|--------|---------|---------|---------|-----|--------|-----------------------------------------------------|-----|----------------------------|
|                   | HsF-IP-293-MG_Ti_104.269 | 2.8488 | 0.3461 | 1865.28 | 1866.11 | 9656.2  | 1   | 1217.8 | 59.4                                                | 2   | R.AVCMLSNTTAIAEAWAR.L      |
|                   | HsGST-MOCK_Ti_404.302    | 2.6983 | 0.1597 | 2332.29 | 2331.52 | 9294.4  | 1   | 579.2  | 42.1                                                | 1   | R.AFVHWYVGEEMEEGFSEAR.E    |
|                   | HsFLAG-Control_HeLa_S10  | 2.1109 | 0.2465 | 906.43  | 907.026 | 5999.8  | 4   | 545.2  | 78.6                                                | 1   | R.EDMAALEK.D               |
|                   | HsGST-MOCK_Ti_402.032    | 5.1595 | 0.5167 | 2350.05 | 2350.28 | 9303.1  | 1   | 2231.4 | 65                                                  | 13  | K.DYEEVGVDSVEGEGEEEGEEY.-  |
| gi 57242777 ref N |                          | 31     | 111    | 0.641   | 103     | 11967   | 5.9 | U      | c-myc binding protein [Homo sapiens]                |     |                            |
| *                 | HsHeLa_Control-MG_Ti_10  | 1.8718 | 0.1038 | 932.77  | 934.078 | 6130.4  | 2   | 456.3  | 62.5                                                | 1   | K.SGVLDLTLK.V              |
| *                 | HsFLAG-Control_HeLa_NE   | 2.2287 | 0.1557 | 933.49  | 934.078 | 6953.2  | 4   | 570.9  | 68.8                                                | 3   | K.SGVLDLTLK.V              |
| *                 | Hs293FLP_Ti_302.1770.17  | 1.8315 | 0.11   | 933.84  | 934.078 | 6868.8  | 7   | 505.7  | 68.8                                                | 1   | K.SGVLDLTLK.V              |
| *                 | HsHeLa-FLAG-IP_S100_Ti_  | 2.8055 | 0.285  | 934.2   | 934.078 | 3315    | 2   | 1060.5 | 93.8                                                | 2   | K.SGVLDLTLK.V              |
| *                 | Hs283FLP_Ti_102.1718.17  | 2.6346 | 0.2574 | 934.28  | 934.078 | 3435.5  | 2   | 1116.1 | 93.8                                                | 1   | K.SGVLDLTLK.V              |
| *                 | HsF-IP-293-MG_Ti_102.172 | 2.8264 | 0.2854 | 934.42  | 934.078 | 3086.2  | 2   | 1044.3 | 93.8                                                | 1   | K.SGVLDLTLK.V              |
| *                 | HsF-IP-293-MG_Ti_106.252 | 4.6434 | 0.321  | 2275.03 | 2276.64 | 5195.1  | 1   | 591.4  | 52.6                                                | 5   | K.VLVALYEEPEKPNALSALDFLK.H |
| *                 | HsHeLa_Control-MG_Ti_20  | 4.1032 | 0.2697 | 2275.52 | 2276.64 | 6566.6  | 5   | 525.6  | 42.1                                                | 3   | K.VLVALYEEPEKPNALSALDFLK.H |
| *                 | HsHeLa_Control-MG_Ti_20  | 4.8105 | 0.3376 | 2275.63 | 2276.64 | 5431.5  | 1   | 824.6  | 39.5                                                | 4   | K.VLVALYEEPEKPNALSALDFLK.H |
| *                 | HsFlag1P_Ti_105.3196.319 | 3.7964 | 0.3032 | 2275.7  | 2276.64 | 5283.9  | 3   | 708.3  | 35.5                                                | 1   | K.VLVALYEEPEKPNALSALDFLK.H |
| *                 | HsHeLa_Control-MG_Ti_10  | 4.0297 | 0.2718 | 2276.28 | 2276.64 | 4858    | 6   | 315.2  | 39.5                                                | 5   | K.VLVALYEEPEKPNALSALDFLK.H |
| *                 | HsFlag1P_Ti_105.3182.318 | 4.9703 | 0.3337 | 2276.93 | 2276.64 | 5615.1  | 1   | 765.1  | 55.3                                                | 7   | K.VLVALYEEPEKPNALSALDFLK.H |
| *                 | HsHeLa_Control_Ti_103.32 | 4.4326 | 0.2926 | 2277    | 2276.64 | 4757.1  | 1   | 520.1  | 47.4                                                | 17  | K.VLVALYEEPEKPNALSALDFLK.H |
| *                 | Hs293FLP-MG_Ti_203.333   | 5.0189 | 0.3308 | 2277.15 | 2276.64 | 6442.8  | 1   | 1332.5 | 43.4                                                | 4   | K.VLVALYEEPEKPNALSALDFLK.H |
| *                 | Hs293FLP_Ti_305.2871.287 | 4.9835 | 0.2992 | 2277.61 | 2276.64 | 5090.9  | 1   | 888.8  | 39.5                                                | 6   | K.VLVALYEEPEKPNALSALDFLK.H |
| *                 | Hs293FLP_Ti_305.2869.287 | 4.712  | 0.3062 | 2277.78 | 2276.64 | 4528    | 1   | 592.2  | 55.3                                                | 6   | K.VLVALYEEPEKPNALSALDFLK.H |
| *                 | HsFLAG-MOCK_300mM_T      | 3.8829 | 0.288  | 2278.23 | 2276.64 | 4759.2  | 2   | 610.6  | 36.8                                                | 2   | K.VLVALYEEPEKPNALSALDFLK.H |
| *                 | HsHeLa_Control-MG_Ti_10  | 4.1419 | 0.2895 | 2278.69 | 2276.64 | 4335.2  | 1   | 682.9  | 39.5                                                | 1   | K.VLVALYEEPEKPNALSALDFLK.H |
| *                 | HsHeLa_Control-MG_Ti_20  | 3.7221 | 0.303  | 1897.15 | 1898.13 | 6623.8  | 1   | 1361.8 | 71.9                                                | 2   | K.HHLGAATPENPEIELLR.L      |
| *                 | Hs293FLP-MG_Ti_206.277   | 4.13   | 0.2925 | 1897.66 | 1898.13 | 6648.9  | 1   | 1156.2 | 65.6                                                | 6   | K.HHLGAATPENPEIELLR.L      |
| *                 | HsHeLa_Control-MG_Ti_20  | 4.481  | 0.2553 | 1897.98 | 1898.13 | 7663.2  | 1   | 1923.3 | 48.4                                                | 2   | K.HHLGAATPENPEIELLR.L      |
| *                 | Hs293FLP-MG_Ti_206.278   | 3.9915 | 0.1388 | 1898.15 | 1898.13 | 7573.5  | 1   | 1701.6 | 48.4                                                | 1   | K.HHLGAATPENPEIELLR.L      |
| *                 | HsHeLa_Control-MG_Ti_10  | 3.9586 | 0.1942 | 1898.76 | 1898.13 | 6063.7  | 1   | 1048.3 | 65.6                                                | 2   | K.HHLGAATPENPEIELLR.L      |
| *                 | HsHeLa_Control-MG_Ti_10  | 3.5319 | 0.1867 | 1899.4  | 1898.13 | 5851.6  | 1   | 1168.1 | 45.3                                                | 1   | K.HHLGAATPENPEIELLR.L      |
| *                 | Hs283FLP_Ti_102.1294.12  | 2.7832 | 0.1096 | 1094.49 | 1095.19 | 6645.8  | 2   | 736.7  | 75                                                  | 3   | K.YEAIVEENK.K              |
| *                 | HsHeLa_Control_Ti_102.12 | 2.5205 | 0.1896 | 1094.53 | 1095.19 | 6487.6  | 3   | 738.4  | 75                                                  | 2   | K.YEAIVEENK.K              |
| *                 | HsHeLa-FLAG-IP_S100_Ti_  | 2.591  | 0.1182 | 1095.11 | 1095.19 | 5670.3  | 1   | 956.5  | 87.5                                                | 1   | K.YEAIVEENK.K              |
| *                 | HsFLAG-Control_Hela_Ti_1 | 2.0223 | 0.2616 | 1331.47 | 1332.45 | 3973    | 3   | 390.3  | 65                                                  | 1   | K.LAQYEPPEEK.R             |
| *                 | Hs293FLP-MG_Ti_202.168   | 2.4056 | 0.1318 | 1331.58 | 1332.45 | 3981.4  | 6   | 296.3  | 55                                                  | 1   | K.LAQYEPPEEK.R             |
| *                 | HsHeLa_Control_Ti_102.13 | 3.0521 | 0.2152 | 1332.02 | 1332.45 | 3289.9  | 1   | 587.5  | 80                                                  | 1   | K.LAQYEPPEEK.R             |
| *                 | HsHeLa-FLAG-IP_S100_Ti_  | 3.5046 | 0.1803 | 1332.35 | 1332.45 | 3938.8  | 5   | 517.3  | 70                                                  | 18  | K.LAQYEPPEEK.R             |
| gi 4505813 ref NF |                          | 7      | 15     | 0.64    | 89      | 10366   | 7.4 | U      | cytoplasmic dynein light polypeptide [Homo sapiens] |     |                            |
| *                 | HsHeLa3_Ti_102.2402.240  | 4.4049 | 0.4002 | 2516.07 | 2515.65 | 9925.5  | 1   | 1374   | 50                                                  | 2   | K.NADMSEEMQQDSVECATQALEK.Y |
| *                 | HsFLAG-Control_HeLa_NE   | 1.8987 | 0.1463 | 767.53  | 767.903 | 3278.1  | 1   | 454.1  | 83.3                                                | 2   | K.DIAAHIK.K                |
| *                 | HsFLAG-MOCK_300mM_T      | 4.1091 | 0.3533 | 1417.72 | 1415.63 | 10275.7 | 1   | 1836   | 86.4                                                | 3   | K.DIAAHIKKFDK.K            |
|                   | HsGST-MOCK_Ti_106.215    | 2.9763 | 0.2661 | 1531.28 | 1531.72 | 5223.3  | 1   | 1038.2 | 81.8                                                | 1   | K.KYNPTWHCIVGR.N           |
|                   | HsFLAG-Control_HeLa_NE   | 2.7353 | 0.2141 | 1282.67 | 1283.38 | 5483    | 1   | 487.8  | 65                                                  | 2   | R.NFGSYVTHETK.H            |
|                   | HsFLAG-Control_HeLa_NE   | 3.2281 | 0.3104 | 1284.39 | 1283.38 | 6420.5  | 2   | 737.8  | 70                                                  | 2   | R.NFGSYVTHETK.H            |
|                   | HsFLAG-Control_HeLa_NE   | 2.9627 | 0.3019 | 1284.57 | 1283.38 | 6332    | 1   | 751.6  | 75                                                  | 3   | R.NFGSYVTHETK.H            |
| gi 57013276 ref N |                          | 45     | 852    | 0.636   | 451     | 50152   | 5.1 | U      | tubulin, alpha, ubiquitous [Homo sapiens]           |     |                            |
|                   | HsFLAG-Control_HeLa_S10  | 5.6931 | 0.4653 | 2009.21 | 2009.09 | 9324.1  | 1   | 1749.3 | 63.2                                                | 204 | K.TIGGGDDSFNTFFSETGAGK.H   |
|                   | HsF-IP-293-MG_Ti_102.277 | 5.0334 | 0.4399 | 1702.32 | 1702.95 | 4530    | 1   | 1284.8 | 82.1                                                | 22  | R.AVFVDLEPTVIDEVR.T        |
|                   | HsFLAG-Control_HeLa_S10  | 4.9427 | 0.335  | 1702.54 | 1702.95 | 7851    | 1   | 1529.4 | 50                                                  | 5   | R.AVFVDLEPTVIDEVR.T        |
|                   | HsFLAG-Control_HeLa_S10  | 4.0389 | 0.2932 | 1703.03 | 1702.95 | 8687.1  | 1   | 1386.4 | 46.4                                                | 2   | R.AVFVDLEPTVIDEVR.T        |

|                          |        |        |         |         |        |       |                                            |      |                                       |
|--------------------------|--------|--------|---------|---------|--------|-------|--------------------------------------------|------|---------------------------------------|
| HsHeLa-FLAG-IP_S100_Ti   | 5.2915 | 0.4169 | 1703.58 | 1702.95 | 4669.1 | 1     | 1294.9                                     | 82.1 | 56 R.AVFVDLEPTVIDEVR.T                |
| HsFLAG-Control_HeLa_S10  | 4.7409 | 0.3371 | 1703.91 | 1702.95 | 5321.1 | 1     | 1259.1                                     | 78.6 | 16 R.AVFVDLEPTVIDEVR.T                |
| HsFLAG-Control_HeLa_NE   | 4.1691 | 0.3052 | 1704.24 | 1702.95 | 8886.6 | 1     | 1330.2                                     | 44.6 | 1 R.AVFVDLEPTVIDEVR.T                 |
| HsHeLa_Control_Ti_102.30 | 5.091  | 0.2766 | 1704.76 | 1702.95 | 4122.7 | 1     | 1098.9                                     | 82.1 | 19 R.AVFVDLEPTVIDEVR.T                |
| HsFLAG-Control_HeLa_S10  | 4.2449 | 0.3005 | 2415.72 | 2416.66 | 8163.2 | 1     | 1212.2                                     | 36.2 | 4 R.QLFHPEQLITGKEDAANNYAR.G           |
| HsHeLa_Control-MG_Ti_10  | 3.4137 | 0.2652 | 2416.42 | 2416.66 | 7726.4 | 1     | 627.9                                      | 45   | 8 R.QLFHPEQLITGKEDAANNYAR.G           |
| HsGST-MOCK_Ti_103.173    | 4.1081 | 0.2897 | 2416.8  | 2416.66 | 6806.6 | 1     | 1048.6                                     | 36.2 | 1 R.QLFHPEQLITGKEDAANNYAR.G           |
| HsFLAG-Control_HeLa_NE   | 3.5321 | 0.3633 | 2417.37 | 2416.66 | 8286.1 | 1     | 502                                        | 42.5 | 3 R.QLFHPEQLITGKEDAANNYAR.G           |
| HsFLAG-Control_HeLa_S10  | 3.3565 | 0.0828 | 1086.26 | 1086.27 | 6338.4 | 2     | 941.8                                      | 87.5 | 18 K.EIIDLVLDLDR.I                    |
| Hs293FLP-MG_Ti_206.350   | 4.9972 | 0.3758 | 3392.79 | 3392.78 | 9865.2 | 1     | 1364.1                                     | 27.4 | 5 K.LADQCTGLQGFLVFHSGGGTSGSFTSLLMER.L |
| HsFLAG-Control_MG_293_   | 3.4903 | 0.1725 | 1719.53 | 1719.9  | 7713.5 | 1     | 803                                        | 61.5 | 17 R.NLDIERPTYTNLNR.L                 |
| HsFLAG-Control_HeLa_S10  | 4.6066 | 0.4074 | 1488.47 | 1488.77 | 7506.5 | 1     | 1467.1                                     | 76.9 | 9 R.LISQIVSSITASLR.F                  |
| HsFLAG-Control_HeLa_S10  | 4.684  | 0.43   | 1488.49 | 1488.77 | 7157.4 | 1     | 1312.2                                     | 73.1 | 22 R.LISQIVSSITASLR.F                 |
| HsHeLa_Control-MG_Ti_20  | 5.0495 | 0.4454 | 1488.53 | 1488.77 | 8030.6 | 1     | 1907.4                                     | 80.8 | 39 R.LISQIVSSITASLR.F                 |
| HsFLAG-Control_HeLa_S10  | 4.722  | 0.3946 | 1488.57 | 1488.77 | 8151.1 | 1     | 1172.8                                     | 69.2 | 9 R.LISQIVSSITASLR.F                  |
| HsFLAG-Control_HeLa_S10  | 4.3035 | 0.346  | 1488.75 | 1488.77 | 5615.6 | 1     | 1324.7                                     | 55.8 | 2 R.LISQIVSSITASLR.F                  |
| HsFLAG-Control_HeLa_S10  | 4.1471 | 0.2471 | 1489.29 | 1488.77 | 5256.5 | 3     | 867.3                                      | 50   | 2 R.LISQIVSSITASLR.F                  |
| HsFLAG-Control_HeLa_NE   | 4.6049 | 0.3537 | 1489.3  | 1488.77 | 6361.1 | 1     | 1211.5                                     | 73.1 | 15 R.LISQIVSSITASLR.F                 |
| HsFLAG-Control_HeLa_NE   | 4.3453 | 0.2295 | 1489.54 | 1488.77 | 5799.3 | 1     | 1231.8                                     | 53.8 | 2 R.LISQIVSSITASLR.F                  |
| HsFLAG-Control_HeLa_S10  | 3.7596 | 0.3173 | 1490.02 | 1488.77 | 5380.1 | 1     | 894.9                                      | 50   | 1 R.LISQIVSSITASLR.F                  |
| HsFLAG-Control_HeLa_NE   | 5.8208 | 0.383  | 2410.89 | 2410.69 | 6224.2 | 1     | 1491.8                                     | 62.5 | 149 R.FDGALNVDLTFEQTNLVPPYPR.I        |
| HsHeLa_Control-MG_Ti_10  | 4.4041 | 0.3426 | 2753.23 | 2752.04 | 7001.1 | 1     | 1357.7                                     | 52.2 | 2 K.AYHEQLSVAEITNACFEPANQMVK.C        |
| Hs293FLP-MG_Ti_103.214   | 3.0177 | 0.1953 | 1251.47 | 1250.43 | 4064.5 | 1     | 618.2                                      | 81.2 | 2 K.YMACCLLYR.G                       |
| HsFLAG-Control_HeLa_S10  | 2.3439 | 0.2742 | 1015.45 | 1016.18 | 7798   | 1     | 652.7                                      | 72.2 | 2 K.DVNAAIATIK.T                      |
| HsFLAG-Control_293_Ti_20 | 2.4919 | 0.2722 | 1015.46 | 1016.18 | 6406.7 | 1     | 644.8                                      | 77.8 | 4 K.DVNAAIATIK.T                      |
| HsFLAG-Control_HeLa_S10  | 2.1932 | 0.1673 | 1015.48 | 1016.18 | 6826.5 | 6     | 502                                        | 66.7 | 1 K.DVNAAIATIK.T                      |
| HsHeLa_Control_Ti_102.17 | 2.4787 | 0.2338 | 1015.71 | 1016.18 | 5846.2 | 1     | 557.5                                      | 77.8 | 3 K.DVNAAIATIK.T                      |
| HsFLAG-Control_HeLa_S10  | 3.6128 | 0.2873 | 1016.27 | 1016.18 | 5362.6 | 1     | 1163.9                                     | 88.9 | 1 K.DVNAAIATIK.T                      |
| HsFLAG-Control_HeLa_S10  | 3.5311 | 0.2771 | 1016.35 | 1016.18 | 5480.7 | 1     | 1193.4                                     | 88.9 | 2 K.DVNAAIATIK.T                      |
| HsFLAG-Control_HeLa_S10  | 3.5176 | 0.2784 | 1016.38 | 1016.18 | 5208.6 | 1     | 1029                                       | 83.3 | 1 K.DVNAAIATIK.T                      |
| HsHeLa-FLAG-IP_S100_Ti   | 3.4285 | 0.2973 | 1016.56 | 1016.18 | 5657.7 | 1     | 925.2                                      | 77.8 | 12 K.DVNAAIATIK.T                     |
| HsFLAG-Control_HeLa_S10  | 2.1618 | 0.2038 | 1017.63 | 1016.18 | 6803   | 6     | 446.1                                      | 66.7 | 2 K.DVNAAIATIK.T                      |
| HsFLAG-Control_HeLa_S10  | 4.2609 | 0.3792 | 1742.64 | 1741.95 | 6595.1 | 1     | 848.5                                      | 61.5 | 13 K.SIQFVDWCPTGFK.V                  |
| HsHeLa_Control-MG_Ti_10  | 2.0279 | 0.2794 | 1584.51 | 1585.77 | 5859.1 | 2     | 301.2                                      | 41.7 | 1 R.SIQFVDWCPTGFK.V                   |
| HsFLAG-Control_HeLa_S10  | 4.2773 | 0.4207 | 1585.41 | 1585.77 | 5673   | 1     | 1071.3                                     | 75   | 19 R.SIQFVDWCPTGFK.V                  |
| HsHeLa_Control-MG_Ti_10  | 4.2534 | 0.4251 | 1587.43 | 1585.77 | 4819.9 | 1     | 915.9                                      | 75   | 18 R.SIQFVDWCPTGFK.V                  |
| HsHeLa-FLAG-IP_S100_Ti   | 4.1491 | 0.409  | 1825.53 | 1826.1  | 3764.8 | 1     | 755.9                                      | 64.7 | 121 K.VGINYQPPTVPPGGDLAK.V            |
| HsF-IP-293-MG_Ti_104.26  | 2.8488 | 0.3461 | 1865.28 | 1866.11 | 9656.2 | 1     | 1217.8                                     | 59.4 | 2 R.AVCMLSNTTAAIEAWAR.L               |
| HsGST-MOCK_Ti_404.302    | 2.6983 | 0.1597 | 2332.29 | 2331.52 | 9294.4 | 1     | 579.2                                      | 42.1 | 1 R.AFVHWYVGEEMEEGEFSEAR.E            |
| HsFLAG-Control_HeLa_S10  | 2.1109 | 0.2465 | 906.43  | 907.026 | 5999.8 | 4     | 545.2                                      | 78.6 | 1 R.EDMAALEK.D                        |
| HsGST-MOCK_Ti_402.032    | 5.1595 | 0.5167 | 2350.05 | 2350.28 | 9303.1 | 1     | 2231.4                                     | 65   | 13 K.DYEEVGVDSVEGEGEEEGEEY.-          |
| gij 4885431 ref NF       | 119    | 605    | 0.635   | 641     | 70025  | 5.6 U | heat shock 70kDa protein 1B [Homo sapiens] |      |                                       |
| Hs293FLP-MG_Ti_204.283   | 3.2702 | 0.2947 | 2265.63 | 2266.53 | 8694.6 | 2     | 578.6                                      | 40.5 | 4 K.AAAIGIDLGTTYSCVGVFQHGK.V          |
| HsF-IP-293-MG_Ti_102.17  | 2.6315 | 0.2566 | 1487.66 | 1488.59 | 3419.2 | 1     | 176.5                                      | 58.3 | 2 R.TTPSYVAFTDTER.L                   |
| Hs293FLP-MG_Ti_202.217   | 3.2886 | 0.3043 | 1487.89 | 1488.59 | 4372.6 | 1     | 860.7                                      | 83.3 | 12 R.TTPSYVAFTDTER.L                  |
| HsFLAG-Control_HeLa_NE   | 3.2444 | 0.2808 | 1487.89 | 1488.59 | 4634.5 | 1     | 570.4                                      | 66.7 | 57 R.TTPSYVAFTDTER.L                  |
| HsHeLa_Control-MG_Ti_20  | 2.4813 | 0.2055 | 1488.47 | 1488.59 | 3249.8 | 1     | 121.1                                      | 50   | 1 R.TTPSYVAFTDTER.L                   |
| HsHeLa_Control-MG_Ti_20  | 3.6044 | 0.4296 | 1489.1  | 1488.59 | 3675.9 | 1     | 589.8                                      | 75   | 9 R.TTPSYVAFTDTER.L                   |
| HsFLAG-MOCK_300mM_T      | 3.2112 | 0.1491 | 2159.14 | 2157.39 | 6487.7 | 1     | 523.9                                      | 44.7 | 2 R.TTPSYVAFTDTERLIGDAAK.N            |

|                          |        |        |         |         |        |   |        |      |    |                                 |
|--------------------------|--------|--------|---------|---------|--------|---|--------|------|----|---------------------------------|
| HsFLAG-Control_HeLa_NE   | 4.9019 | 0.3489 | 1660.59 | 1659.84 | 5531   | 1 | 994.8  | 71.4 | 42 | K.NQVALNPQNTVFDK.R              |
| Hs293FLP_Ti_302.1600.16  | 3.5544 | 0.3409 | 1223.7  | 1223.39 | 4705   | 2 | 1008.8 | 85   | 2  | K.FGDPVVQSDMK.H                 |
| HsGST-MOCK_Ti_406.270    | 3.0808 | 0.2337 | 1681.64 | 1681.89 | 4124.2 | 1 | 538.8  | 65.4 | 2  | K.HWPFQVINDGDKPK.V              |
| HsHeLa_Control_Ti_106.31 | 2.769  | 0.2496 | 1681.82 | 1681.89 | 3194.8 | 1 | 355.5  | 57.7 | 1  | K.HWPFQVINDGDKPK.V              |
| HsGST-MOCK_Ti_103.166    | 4.5852 | 0.1849 | 1682.23 | 1681.89 | 5199.4 | 1 | 1240   | 53.8 | 1  | K.HWPFQVINDGDKPK.V              |
| HsHeLa_Control-MG_Ti_20  | 3.6708 | 0.2074 | 1682.59 | 1681.89 | 5824   | 2 | 990.2  | 48.1 | 1  | K.HWPFQVINDGDKPK.V              |
| HsFLAG-MOCK_300mM_T      | 4.3972 | 0.3004 | 1682.6  | 1681.89 | 4758.1 | 1 | 1009.5 | 51.9 | 2  | K.HWPFQVINDGDKPK.V              |
| Hs293FLP-MG_Ti_206.285   | 4.0055 | 0.3067 | 1682.73 | 1681.89 | 4323.9 | 1 | 887.7  | 76.9 | 7  | K.HWPFQVINDGDKPK.V              |
| HsHeLa_Control-MG_Ti_10  | 3.2443 | 0.2897 | 1682.79 | 1681.89 | 3614.5 | 1 | 510.4  | 65.4 | 3  | K.HWPFQVINDGDKPK.V              |
| HsFLAG-Control_MG_293_   | 2.676  | 0.2572 | 1138.42 | 1139.29 | 6100   | 3 | 519.3  | 66.7 | 1  | K.VQVSYKGETK.A                  |
| Hs293FLP-MG_Ti_104.114   | 3.1041 | 0.2251 | 1140.53 | 1139.29 | 4332.1 | 8 | 587.1  | 72.2 | 3  | K.VQVSYKGETK.A                  |
| HsGST-MOCK_Ti_302.323    | 3.467  | 0.4254 | 1615.76 | 1615.88 | 4904.2 | 1 | 879.9  | 76.9 | 1  | K.AFYPEEISSMVLTK.M              |
| HsFLAG-Control_HeLa_NE   | 2.6584 | 0.1973 | 3001.48 | 3003.34 | 6084.6 | 1 | 341.5  | 30.8 | 1  | K.EIAEAYLGYPVTNAVITVPAYFNDSQR.Q |
| Hs293FLP-MG_Ti_202.419   | 3.988  | 0.4419 | 3001.65 | 3003.34 | 4865   | 1 | 660.7  | 42.3 | 5  | K.EIAEAYLGYPVTNAVITVPAYFNDSQR.Q |
| HsHeLa_Control-MG_Ti_20  | 3.9441 | 0.314  | 3002.47 | 3003.34 | 4789.9 | 1 | 549.7  | 42.3 | 2  | K.EIAEAYLGYPVTNAVITVPAYFNDSQR.Q |
| HsFLAG-Control_HeLa_S1   | 3.7718 | 0.2522 | 3002.63 | 3003.34 | 4631.4 | 1 | 489.2  | 29.8 | 1  | K.EIAEAYLGYPVTNAVITVPAYFNDSQR.Q |
| Hs293FLP-MG_Ti_202.419   | 3.9208 | 0.3228 | 3003.18 | 3003.34 | 4032.5 | 1 | 421.3  | 29.8 | 2  | K.EIAEAYLGYPVTNAVITVPAYFNDSQR.Q |
| Hs283FLP_Ti_102.3387.33  | 3.3026 | 0.1464 | 3003.31 | 3003.34 | 4716.6 | 2 | 362.3  | 34.6 | 4  | K.EIAEAYLGYPVTNAVITVPAYFNDSQR.Q |
| HsGST-MOCK_Ti_302.395    | 3.5482 | 0.2999 | 3003.39 | 3003.34 | 5075   | 1 | 460.2  | 38.5 | 2  | K.EIAEAYLGYPVTNAVITVPAYFNDSQR.Q |
| HsGST-MOCK_Ti_403.415    | 4.0344 | 0.288  | 3003.52 | 3003.34 | 4580   | 1 | 578.1  | 31.7 | 1  | K.EIAEAYLGYPVTNAVITVPAYFNDSQR.Q |
| HsFLAG-Control_HeLa_NE   | 3.9805 | 0.2081 | 3003.55 | 3003.34 | 4327.2 | 2 | 391.5  | 28.8 | 2  | K.EIAEAYLGYPVTNAVITVPAYFNDSQR.Q |
| HsFLAG-Control_HeLa_S1   | 3.6967 | 0.2344 | 3003.74 | 3003.34 | 4957.1 | 2 | 329.7  | 32.7 | 4  | K.EIAEAYLGYPVTNAVITVPAYFNDSQR.Q |
| HsHeLa_Control-MG_Ti_20  | 4.0641 | 0.1086 | 3003.9  | 3003.34 | 4274.4 | 1 | 498    | 31.7 | 1  | K.EIAEAYLGYPVTNAVITVPAYFNDSQR.Q |
| HsFLAG-Control_HeLa_S1   | 3.444  | 0.306  | 3004.11 | 3003.34 | 5315.9 | 3 | 298.6  | 32.7 | 2  | K.EIAEAYLGYPVTNAVITVPAYFNDSQR.Q |
| HsFLAG-Control_293_Ti_2  | 4.0252 | 0.2246 | 3004.15 | 3003.34 | 4916.1 | 1 | 458.1  | 36.5 | 8  | K.EIAEAYLGYPVTNAVITVPAYFNDSQR.Q |
| HsFLAG-Control_HeLa_S1   | 3.966  | 0.2705 | 3004.53 | 3003.34 | 4838.8 | 1 | 590.9  | 32.7 | 1  | K.EIAEAYLGYPVTNAVITVPAYFNDSQR.Q |
| Hs283FLP_Ti_103.3091.30  | 4.383  | 0.2231 | 3005.21 | 3003.34 | 3917.1 | 1 | 461.2  | 29.8 | 3  | K.EIAEAYLGYPVTNAVITVPAYFNDSQR.Q |
| HsFLAG-Control_293_Ti_2  | 3.9403 | 0.1343 | 3006.04 | 3003.34 | 4464.8 | 5 | 413.7  | 28.8 | 1  | K.EIAEAYLGYPVTNAVITVPAYFNDSQR.Q |
| Hs293FLP-MG_Ti_202.302   | 2.4988 | 0.215  | 1197.55 | 1198.41 | 3227.7 | 3 | 256.7  | 59.1 | 2  | K.DAGVIAGLNVL.R.I               |
| HsFLAG-Control_HeLa_S1   | 4.4911 | 0.242  | 1198.36 | 1198.41 | 6241.2 | 1 | 1789.9 | 90.9 | 34 | K.DAGVIAGLNVL.R.I               |
| Hs293FLP-MG_Ti_202.302   | 4.3885 | 0.222  | 1198.53 | 1198.41 | 6626.9 | 1 | 1848   | 90.9 | 8  | K.DAGVIAGLNVL.R.I               |
| Hs293FLP-MG_Ti_202.294   | 4.8775 | 0.4462 | 1687.76 | 1688.92 | 5341.9 | 1 | 1731.2 | 83.3 | 3  | R.IINEPTAAAIAAYGLDR.T           |
| HsGST-MOCK_Ti_303.271    | 5.3019 | 0.4188 | 1687.89 | 1688.92 | 6005.7 | 1 | 1770   | 80   | 5  | R.IINEPTAAAIAAYGLDR.T           |
| HsFLAG-Control_293_Ti_2  | 4.1753 | 0.1988 | 1687.96 | 1688.92 | 6399   | 1 | 1885.4 | 51.7 | 1  | R.IINEPTAAAIAAYGLDR.T           |
| HsFLAG-Control_HeLa_S1   | 4.903  | 0.4088 | 1688.25 | 1688.92 | 7186.8 | 1 | 1733   | 73.3 | 10 | R.IINEPTAAAIAAYGLDR.T           |
| HsFLAG-Control_HeLa_S1   | 3.9936 | 0.1641 | 1688.33 | 1688.92 | 7417.7 | 1 | 1534   | 45   | 1  | R.IINEPTAAAIAAYGLDR.T           |
| HsFLAG-Control_HeLa_S1   | 5.0183 | 0.3954 | 1688.36 | 1688.92 | 5572.8 | 1 | 1466.9 | 76.7 | 6  | R.IINEPTAAAIAAYGLDR.T           |
| Hs283FLP_Ti_102.2353.23  | 3.8797 | 0.1309 | 1688.68 | 1688.92 | 7756.8 | 2 | 1564.1 | 46.7 | 1  | R.IINEPTAAAIAAYGLDR.T           |
| HsFLAG-Control_HeLa_NE   | 4.519  | 0.1849 | 1688.87 | 1688.92 | 8251.2 | 1 | 1695   | 48.3 | 2  | R.IINEPTAAAIAAYGLDR.T           |
| Hs293FLP_Ti_302.2512.25  | 5.4892 | 0.4056 | 1689.01 | 1688.92 | 4983.8 | 1 | 1547.6 | 80   | 6  | R.IINEPTAAAIAAYGLDR.T           |
| HsF-IP-293-MG_Ti_102.22  | 4.8927 | 0.3179 | 1689.03 | 1688.92 | 5477.4 | 1 | 1448.1 | 76.7 | 2  | R.IINEPTAAAIAAYGLDR.T           |
| HsF-IP-293-MG_Ti_102.23  | 4.2375 | 0.1806 | 1689.14 | 1688.92 | 8011.1 | 1 | 1686.5 | 46.7 | 1  | R.IINEPTAAAIAAYGLDR.T           |
| Hs293FLP-MG_Ti_202.294   | 5.0798 | 0.1684 | 1689.4  | 1688.92 | 8497.4 | 1 | 2183.9 | 51.7 | 2  | R.IINEPTAAAIAAYGLDR.T           |
| HsFLAG-Control_HeLa_S1   | 3.5964 | 0.1281 | 1689.42 | 1688.92 | 8134.2 | 1 | 1438.2 | 45   | 1  | R.IINEPTAAAIAAYGLDR.T           |
| HsFLAG-Control_HeLa_NE   | 5.5152 | 0.4246 | 1689.75 | 1688.92 | 5197.5 | 1 | 1487.3 | 76.7 | 18 | R.IINEPTAAAIAAYGLDR.T           |
| HsHeLa_Control-MG_Ti_10  | 5.0746 | 0.318  | 1689.79 | 1688.92 | 5333.8 | 1 | 1131.8 | 70   | 9  | R.IINEPTAAAIAAYGLDR.T           |
| HsFLAG-Control_293_Ti_2  | 4.5503 | 0.4103 | 1677.37 | 1676.7  | 7130.1 | 1 | 1456.7 | 70   | 19 | K.ATAGDTHLGGEDFDNR.L            |
| Hs293FLP-MG_Ti_204.200   | 2.4977 | 0.2506 | 1261.52 | 1262.45 | 5742.7 | 3 | 369.7  | 55.6 | 2  | R.LVNHFVEEFK.R                  |
| HsFLAG-Control_HeLa_NE   | 2.4484 | 0.2621 | 1261.58 | 1262.45 | 6474.4 | 2 | 519.7  | 61.1 | 2  | R.LVNHFVEEFK.R                  |

|                          |        |        |         |         |         |   |        |      |                                      |
|--------------------------|--------|--------|---------|---------|---------|---|--------|------|--------------------------------------|
| Hs283FLP_Ti_105.1687.16  | 2.3922 | 0.2357 | 1261.59 | 1262.45 | 5641.6  | 1 | 471.2  | 61.1 | 1 R.LVNHFVEEFK.R                     |
| HsFLAG-Control_MG_293_   | 2.5907 | 0.2398 | 1261.63 | 1262.45 | 5790.7  | 1 | 510.2  | 66.7 | 2 R.LVNHFVEEFK.R                     |
| Hs293FLP_Ti_304.1822.18  | 2.5334 | 0.2709 | 1261.64 | 1262.45 | 6628.4  | 1 | 523    | 61.1 | 2 R.LVNHFVEEFK.R                     |
| HsGST-MOCK_Ti_305.212    | 2.5835 | 0.1943 | 1261.66 | 1262.45 | 4109.2  | 3 | 355    | 61.1 | 1 R.LVNHFVEEFK.R                     |
| HsFLAG-Control_293_Ti_2  | 2.5369 | 0.2325 | 1261.67 | 1262.45 | 6890.5  | 3 | 474.8  | 55.6 | 2 R.LVNHFVEEFK.R                     |
| Hs293FLP-MG_Ti_204.199   | 3.6059 | 0.266  | 1262.13 | 1262.45 | 7431.6  | 1 | 1201.7 | 83.3 | 1 R.LVNHFVEEFK.R                     |
| HsGST-MOCK_Ti_305.211    | 3.5635 | 0.2773 | 1262.24 | 1262.45 | 6917.9  | 1 | 1154.1 | 83.3 | 4 R.LVNHFVEEFK.R                     |
| HsFLAG-Control_MG_293_   | 3.8991 | 0.2729 | 1262.43 | 1262.45 | 6976.8  | 1 | 1190.2 | 83.3 | 33 R.LVNHFVEEFK.R                    |
| Hs293FLP_TREX_Ti_105.1   | 3.7395 | 0.2763 | 1262.43 | 1262.45 | 7099.4  | 1 | 1398   | 88.9 | 6 R.LVNHFVEEFK.R                     |
| HsFLAG-Control_HeLa_NE   | 3.4435 | 0.2104 | 1262.57 | 1262.45 | 8132    | 1 | 1323.1 | 83.3 | 4 R.LVNHFVEEFK.R                     |
| HsFLAG-Control_HeLa_NE   | 3.8151 | 0.3148 | 1262.58 | 1262.45 | 8917.1  | 1 | 1383.3 | 83.3 | 10 R.LVNHFVEEFK.R                    |
| Hs293FLP_Ti_304.1818.18  | 3.4238 | 0.2773 | 1262.64 | 1262.45 | 6805.9  | 1 | 1174.1 | 83.3 | 2 R.LVNHFVEEFK.R                     |
| HsFLAG-Control_293_Ti_2  | 3.6997 | 0.2789 | 1262.73 | 1262.45 | 7600.5  | 1 | 1014.7 | 77.8 | 5 R.LVNHFVEEFK.R                     |
| Hs293FLP_Ti_305.1718.17  | 3.1455 | 0.3209 | 1420.05 | 1418.64 | 6349.5  | 1 | 760.9  | 70   | 6 R.LVNHFVEEFK.R                     |
| HsFLAG-Control_HeLa_NE   | 5.1596 | 0.3539 | 2982.25 | 2983.26 | 7427.5  | 1 | 1240.4 | 48.1 | 6 R.TLSSSTQASLEIDSLFEGIDFYTSITR.A    |
| HsFLAG-Control_HeLa_S1   | 4.5252 | 0.4278 | 2983.55 | 2983.26 | 9450.9  | 1 | 989.4  | 38.5 | 3 R.TLSSSTQASLEIDSLFEGIDFYTSITR.A    |
| HsFLAG-Control_HeLa_NE   | 5.2765 | 0.3259 | 2983.84 | 2983.26 | 10601.4 | 1 | 2210.9 | 34.6 | 1 R.TLSSSTQASLEIDSLFEGIDFYTSITR.A    |
| HsGST-MOCK_Ti_404.277    | 3.9207 | 0.2533 | 1543.5  | 1543.69 | 5188.1  | 1 | 843.1  | 72.7 | 4 R.ARFEELCSDLFR.S                   |
| HsGST-MOCK_Ti_102.200    | 3.7463 | 0.1191 | 1543.86 | 1543.69 | 7015    | 1 | 1515   | 52.3 | 1 R.ARFEELCSDLFR.S                   |
| Hs293FLP_Ti_303.2415.24  | 4.2742 | 0.302  | 1545.2  | 1543.69 | 4892.3  | 1 | 1270.4 | 86.4 | 21 R.ARFEELCSDLFR.S                  |
| HsFLAG-Control_HeLa_S1   | 3.4883 | 0.2705 | 1316.29 | 1316.42 | 7134.9  | 5 | 1058.9 | 77.8 | 8 R.FEELCSDLFR.S                     |
| HsFLAG-Control_HeLa_NE   | 2.0048 | 0.1567 | 902.47  | 903.02  | 4539.8  | 5 | 443.3  | 71.4 | 4 R.STLEPVEK.A                       |
| HsFLAG-Control_MG_293_   | 3.5139 | 0.1965 | 1110.11 | 1110.26 | 6808.4  | 1 | 1199.2 | 87.5 | 27 K.LLQDFFNGR.D                     |
| HsGST-MOCK_Ti_403.434    | 4.8873 | 0.4836 | 2303.72 | 2305.61 | 7751.9  | 1 | 1475.4 | 54.5 | 11 K.SINPDEAVAYGAAVQAAILMGDK.S       |
| HsGST-MOCK_Ti_403.436    | 5.5284 | 0.3617 | 2305.81 | 2305.61 | 9393.7  | 1 | 2713.4 | 44.3 | 1 K.SINPDEAVAYGAAVQAAILMGDK.S        |
| HsFLAG-Control_293_Ti_1  | 3.2967 | 0.3581 | 3181.76 | 3182.74 | 6743.4  | 1 | 554.7  | 33.3 | 3 K.SENVQDLLLDDVAPLSLGLTAGGVMTALIK.R |
| HsHeLa_Control-MG_Ti_20  | 6.3425 | 0.4536 | 3181.94 | 3182.74 | 10797.9 | 1 | 2183   | 31.7 | 7 K.SENVQDLLLDDVAPLSLGLTAGGVMTALIK.R |
| HsFLAG-Control_293_Ti_1  | 4.742  | 0.3629 | 3182.17 | 3182.74 | 10758.3 | 1 | 1110.1 | 26.7 | 1 K.SENVQDLLLDDVAPLSLGLTAGGVMTALIK.R |
| HsGST-MOCK_Ti_306.054    | 5.6551 | 0.3649 | 3182.29 | 3182.74 | 9743.4  | 1 | 1523.6 | 30.8 | 5 K.SENVQDLLLDDVAPLSLGLTAGGVMTALIK.R |
| HsF-IP-293-MG_Ti_106.33  | 4.4641 | 0.3484 | 3182.3  | 3182.74 | 4557.5  | 1 | 394.1  | 35   | 7 K.SENVQDLLLDDVAPLSLGLTAGGVMTALIK.R |
| HsHeLa_Control-MG_Ti_20  | 4.1527 | 0.4037 | 3182.72 | 3182.74 | 6057.5  | 1 | 702.4  | 38.3 | 4 K.SENVQDLLLDDVAPLSLGLTAGGVMTALIK.R |
| HsGST-MOCK_Ti_303.335    | 2.5776 | 0.2963 | 2786.6  | 2788.04 | 7450.8  | 1 | 473.9  | 37   | 1 K.QTQIFTTYSNQPGLIQQVYEGER.A        |
| Hs293FLP-MG_Ti_204.321   | 4.2945 | 0.5036 | 2787.69 | 2788.04 | 6064.2  | 1 | 769.6  | 45.7 | 4 K.QTQIFTTYSNQPGLIQQVYEGER.A        |
| Hs293FLP-MG_Ti_205.311   | 5.4004 | 0.3198 | 2788.58 | 2788.04 | 11083.1 | 1 | 1393.9 | 33.7 | 2 K.QTQIFTTYSNQPGLIQQVYEGER.A        |
| HsFLAG-Control_HeLa_S1   | 3.5026 | 0.3748 | 2788.84 | 2788.04 | 6443.9  | 1 | 586    | 41.3 | 2 K.QTQIFTTYSNQPGLIQQVYEGER.A        |
| HsFLAG-Control_HeLa_NE   | 3.9327 | 0.3083 | 2788.9  | 2788.04 | 14432.1 | 5 | 820.7  | 26.1 | 2 K.QTQIFTTYSNQPGLIQQVYEGER.A        |
| Hs293FLP_Ti_302.3136.31  | 4.1608 | 0.366  | 2789.84 | 2788.04 | 7098.1  | 1 | 800.1  | 31.5 | 1 K.QTQIFTTYSNQPGLIQQVYEGER.A        |
| HsFLAG-Control_MG_293_   | 2.37   | 0.1055 | 1183.56 | 1184.38 | 4415.4  | 2 | 447.5  | 65   | 2 R.FELSGIPPAPR.G                    |
| HsFLAG-Control_MG_293_   | 3.253  | 0.2405 | 1184.35 | 1184.38 | 3642.9  | 1 | 911.3  | 80   | 11 R.FELSGIPPAPR.G                   |
| HsFLAG-Control_MG_293_   | 3.8888 | 0.3065 | 1289.5  | 1288.46 | 6627.1  | 1 | 1451.2 | 85   | 5 K.NALESYAFNMK.S                    |
| HsFLAG-Control_HeLa_NE   | 2.1567 | 0.1434 | 947.4   | 948.018 | 9862.3  | 6 | 694    | 62.5 | 3 K.SAVEDEGLK.G                      |
| HsGST-MOCK_Ti_102.232    | 3.7854 | 0.3557 | 2663.49 | 2663.87 | 7161.2  | 1 | 876.9  | 47.6 | 2 K.CQEVISWLDANTLAEKDEFEHK.R         |
| Hs293FLP-MG_Ti_205.284   | 4.6951 | 0.3329 | 3185.32 | 3185.53 | 8783.5  | 1 | 1540   | 31.5 | 1 R.KELEQVCNPIISGLYQQAGGPGGGFQAQGP.K |
| HsGST-MOCK_Ti_405.327    | 4.7798 | 0.3593 | 3055.46 | 3057.36 | 7871.6  | 1 | 1607.6 | 34.2 | 1 K.ELEQVCNPIISGLYQQAGGPGGGFQAQGP.K  |
| HsHeLa_Control-MG_Ti_20  | 3.4944 | 0.4245 | 3055.59 | 3057.36 | 7975.4  | 1 | 838.4  | 35   | 1 K.ELEQVCNPIISGLYQQAGGPGGGFQAQGP.K  |
| HsF-IP-293_Ti_204.2917.2 | 2.8978 | 0.2397 | 3055.78 | 3057.36 | 7958.5  | 1 | 462.5  | 30   | 1 K.ELEQVCNPIISGLYQQAGGPGGGFQAQGP.K  |
| Hs293FLP-MG_Ti_203.336   | 4.3577 | 0.3974 | 3055.86 | 3057.36 | 9217.9  | 1 | 878.5  | 36.7 | 2 K.ELEQVCNPIISGLYQQAGGPGGGFQAQGP.K  |
| HsHeLa3_Ti_104.3109.31   | 3.8407 | 0.4989 | 3056.05 | 3057.36 | 5236.2  | 1 | 614.8  | 40   | 2 K.ELEQVCNPIISGLYQQAGGPGGGFQAQGP.K  |
| HsFLAG-Control_293_Ti_1  | 6.8367 | 0.4432 | 3056.18 | 3057.36 | 9398.5  | 1 | 1848.1 | 34.2 | 2 K.ELEQVCNPIISGLYQQAGGPGGGFQAQGP.K  |



|                          |        |        |         |         |         |     |        |                                                  |    |                                     |
|--------------------------|--------|--------|---------|---------|---------|-----|--------|--------------------------------------------------|----|-------------------------------------|
| Hs293FLP_Ti_303.2947.29  | 4.0835 | 0.4932 | 3056.26 | 3057.36 | 6503.7  | 1   | 820.1  | 40                                               | 2  | K.ELEQVCNPIISGLYQQAGGPGGGFGAQQGPK.G |
| HsFLAG-Control_293_Ti_10 | 5.1265 | 0.4028 | 3056.32 | 3057.36 | 6353.9  | 1   | 876.7  | 43.3                                             | 2  | K.ELEQVCNPIISGLYQQAGGPGGGFGAQQGPK.G |
| Hs293FLP-MG_Ti_203.336   | 6.9009 | 0.436  | 3056.42 | 3057.36 | 8440.5  | 1   | 2521.9 | 37.5                                             | 2  | K.ELEQVCNPIISGLYQQAGGPGGGFGAQQGPK.G |
| HsHeLa_Control-MG_Ti_20  | 6.5314 | 0.4244 | 3056.43 | 3057.36 | 8158.6  | 1   | 2297.5 | 38.3                                             | 2  | K.ELEQVCNPIISGLYQQAGGPGGGFGAQQGPK.G |
| HsFLAG-Control_293_Ti_20 | 4.7242 | 0.4588 | 3056.75 | 3057.36 | 7695.8  | 1   | 1186.7 | 43.3                                             | 1  | K.ELEQVCNPIISGLYQQAGGPGGGFGAQQGPK.G |
| Hs283FLP_Ti_104.2544.25  | 6.3147 | 0.4418 | 3056.86 | 3057.36 | 9055.8  | 1   | 2279.7 | 36.7                                             | 2  | K.ELEQVCNPIISGLYQQAGGPGGGFGAQQGPK.G |
| HsGST-MOCK_Ti_405.328    | 3.9418 | 0.3045 | 3056.9  | 3057.36 | 8303    | 1   | 624.7  | 31.7                                             | 1  | K.ELEQVCNPIISGLYQQAGGPGGGFGAQQGPK.G |
| HsFLAG-Control_HeLa_NE   | 7.2394 | 0.4746 | 3056.99 | 3057.36 | 10678.3 | 1   | 4070.1 | 41.7                                             | 14 | K.ELEQVCNPIISGLYQQAGGPGGGFGAQQGPK.G |
| HsF-IP-293-MG_Ti_103.27  | 4.3936 | 0.3195 | 3057.06 | 3057.36 | 8142.5  | 1   | 1078.8 | 30                                               | 3  | K.ELEQVCNPIISGLYQQAGGPGGGFGAQQGPK.G |
| Hs293FLP_Ti_303.2945.29  | 6.9596 | 0.3371 | 3057.08 | 3057.36 | 8400.8  | 1   | 2283.8 | 36.7                                             | 3  | K.ELEQVCNPIISGLYQQAGGPGGGFGAQQGPK.G |
| HsHeLa_Control-MG_Ti_10  | 5.8796 | 0.3096 | 3057.29 | 3057.36 | 8102.1  | 1   | 1828.9 | 35                                               | 2  | K.ELEQVCNPIISGLYQQAGGPGGGFGAQQGPK.G |
| HsHeLa_Control_Ti_104.35 | 6.6676 | 0.3746 | 3057.45 | 3057.36 | 9233.7  | 1   | 2250.6 | 36.7                                             | 2  | K.ELEQVCNPIISGLYQQAGGPGGGFGAQQGPK.G |
| HsHeLa_Control_Ti_104.35 | 4.4827 | 0.4406 | 3058    | 3057.36 | 5486.1  | 1   | 736.9  | 40                                               | 1  | K.ELEQVCNPIISGLYQQAGGPGGGFGAQQGPK.G |
| HsHeLa_Control-MG_Ti_10  | 4.4422 | 0.3802 | 3058.19 | 3057.36 | 5565    | 1   | 715.2  | 41.7                                             | 2  | K.ELEQVCNPIISGLYQQAGGPGGGFGAQQGPK.G |
| gi 29788768 ref          | 77     | 422    | 0.631   | 445     | 49953   | 4.9 | U      | tubulin, beta polypeptide paralog [Homo sapiens] |    |                                     |
| HsF-IP-293-MG_Ti_102.23  | 4.2116 | 0.3257 | 1617.72 | 1616.87 | 4090.1  | 1   | 901.5  | 75                                               | 15 | R.AILVDLEPGTMDSVR.S                 |
| HsFLAG-Control_293_Ti_10 | 4.3497 | 0.4199 | 2798.44 | 2800.07 | 7089.6  | 1   | 789.7  | 42                                               | 2  | R.SGPFQIFRPDNFVFGQSGAGNNWAK.G       |
| HsFLAG-Control_HeLa_Ti_1 | 7.086  | 0.3585 | 2798.77 | 2800.07 | 8023.8  | 1   | 2007.6 | 39                                               | 1  | R.SGPFQIFRPDNFVFGQSGAGNNWAK.G       |
| HsHeLa_Control_Ti_106.35 | 3.3717 | 0.284  | 2799.08 | 2800.07 | 7040.2  | 1   | 509.9  | 34                                               | 1  | R.SGPFQIFRPDNFVFGQSGAGNNWAK.G       |
| HsFLAG-Control_HeLa_NE   | 5.559  | 0.4744 | 2799.13 | 2800.07 | 8777.8  | 1   | 1234   | 44                                               | 3  | R.SGPFQIFRPDNFVFGQSGAGNNWAK.G       |
| Hs293FLP_Ti_306.3134.31  | 4.4896 | 0.3405 | 2799.39 | 2800.07 | 5985.1  | 1   | 712.5  | 40                                               | 3  | R.SGPFQIFRPDNFVFGQSGAGNNWAK.G       |
| HsFLAG-Control_HeLa_S10  | 5.0217 | 0.2644 | 2799.44 | 2800.07 | 9812.3  | 1   | 1983   | 35                                               | 4  | R.SGPFQIFRPDNFVFGQSGAGNNWAK.G       |
| HsFLAG-Control_HeLa_Ti_1 | 4.9745 | 0.3403 | 2799.45 | 2800.07 | 9442    | 1   | 1330.7 | 46                                               | 2  | R.SGPFQIFRPDNFVFGQSGAGNNWAK.G       |
| Hs293FLP-MG_Ti_206.324   | 5.6902 | 0.3542 | 2799.53 | 2800.07 | 9458.1  | 1   | 2291.7 | 38                                               | 3  | R.SGPFQIFRPDNFVFGQSGAGNNWAK.G       |
| HsFLAG-Control_293_Ti_10 | 6.1007 | 0.3859 | 2799.74 | 2800.07 | 9348.5  | 1   | 3099.1 | 42                                               | 2  | R.SGPFQIFRPDNFVFGQSGAGNNWAK.G       |
| HsFLAG-Control_HeLa_S10  | 5.4454 | 0.3567 | 2799.89 | 2800.07 | 7677.5  | 1   | 1212.9 | 46                                               | 3  | R.SGPFQIFRPDNFVFGQSGAGNNWAK.G       |
| HsHeLa_Control-MG_Ti_20  | 5.2597 | 0.3817 | 2799.92 | 2800.07 | 8298.5  | 1   | 1407.9 | 48                                               | 8  | R.SGPFQIFRPDNFVFGQSGAGNNWAK.G       |
| HsFLAG-Control_HeLa_S10  | 4.9984 | 0.3992 | 2799.99 | 2800.07 | 8366    | 1   | 1288.2 | 46                                               | 5  | R.SGPFQIFRPDNFVFGQSGAGNNWAK.G       |
| HsHeLa_Control_Ti_106.35 | 5.7438 | 0.2886 | 2800.05 | 2800.07 | 8407.2  | 1   | 2280   | 38                                               | 3  | R.SGPFQIFRPDNFVFGQSGAGNNWAK.G       |
| HsFLAG-Control_HeLa_S10  | 6.1803 | 0.4125 | 2800.31 | 2800.07 | 9515.8  | 1   | 2575.2 | 39                                               | 10 | R.SGPFQIFRPDNFVFGQSGAGNNWAK.G       |
| Hs293FLP-MG_Ti_206.324   | 4.0474 | 0.285  | 2800.79 | 2800.07 | 6819.9  | 1   | 693.4  | 38                                               | 4  | R.SGPFQIFRPDNFVFGQSGAGNNWAK.G       |
| Hs293FLP_Ti_306.3122.31  | 5.4056 | 0.2637 | 2801.19 | 2800.07 | 8261.6  | 1   | 1963.1 | 38                                               | 2  | R.SGPFQIFRPDNFVFGQSGAGNNWAK.G       |
| HsHeLa_Control-MG_Ti_20  | 6.5624 | 0.445  | 2801.2  | 2800.07 | 8704.9  | 1   | 2240.6 | 38                                               | 7  | R.SGPFQIFRPDNFVFGQSGAGNNWAK.G       |
| HsFLAG-Control_HeLa_NE   | 6.3579 | 0.3994 | 2801.45 | 2800.07 | 8898.9  | 1   | 2491.9 | 40                                               | 3  | R.SGPFQIFRPDNFVFGQSGAGNNWAK.G       |
| HsGST-MOCK_Ti_102.286    | 3.2049 | 0.3313 | 1958.45 | 1960.15 | 8017.5  | 1   | 762.8  | 52.9                                             | 1  | K.GHYTEGAELVDSVLDVVR.K              |
| HsFLAG-Control_HeLa_S10  | 4.1642 | 0.2955 | 1959.3  | 1960.15 | 8544.6  | 2   | 1215.8 | 38.2                                             | 2  | K.GHYTEGAELVDSVLDVVR.K              |
| HsGST-MOCK_Ti_403.395    | 4.7164 | 0.3422 | 1959.33 | 1960.15 | 10548.9 | 1   | 1301.9 | 55.9                                             | 1  | K.GHYTEGAELVDSVLDVVR.K              |
| HsFLAG-Control_HeLa_NE   | 5.3562 | 0.4242 | 1959.63 | 1960.15 | 11243.1 | 1   | 2825.8 | 70.6                                             | 3  | K.GHYTEGAELVDSVLDVVR.K              |
| Hs293FLP_Ti_303.3357.33  | 4.1617 | 0.1819 | 1959.92 | 1960.15 | 7405    | 2   | 1468.9 | 42.6                                             | 6  | K.GHYTEGAELVDSVLDVVR.K              |
| HsHeLa_Control-MG_Ti_10  | 6.1452 | 0.4266 | 1959.96 | 1960.15 | 8101.6  | 1   | 2856.7 | 79.4                                             | 5  | K.GHYTEGAELVDSVLDVVR.K              |
| Hs293FLP-MG_Ti_205.353   | 4.315  | 0.1813 | 1959.98 | 1960.15 | 9417.8  | 1   | 1643   | 41.2                                             | 5  | K.GHYTEGAELVDSVLDVVR.K              |
| Hs293FLP-MG_Ti_204.367   | 6.6846 | 0.431  | 1959.98 | 1960.15 | 10282.1 | 1   | 3961.5 | 82.4                                             | 8  | K.GHYTEGAELVDSVLDVVR.K              |
| Hs293FLP_Ti_306.3198.31  | 6.98   | 0.3863 | 1960.01 | 1960.15 | 9148.7  | 1   | 3744.2 | 85.3                                             | 7  | K.GHYTEGAELVDSVLDVVR.K              |
| HsFLAG-Control_HeLa_S10  | 4.5919 | 0.2553 | 1960.03 | 1960.15 | 7594.6  | 1   | 1242.3 | 41.2                                             | 2  | K.GHYTEGAELVDSVLDVVR.K              |
| HsHeLa_Control-MG_Ti_10  | 3.5165 | 0.1922 | 1960.13 | 1960.15 | 6171.6  | 3   | 834.7  | 35.3                                             | 1  | K.GHYTEGAELVDSVLDVVR.K              |
| HsHeLa_Control-MG_Ti_20  | 4.3353 | 0.2198 | 1960.22 | 1960.15 | 8005.9  | 1   | 1897.4 | 47.1                                             | 2  | K.GHYTEGAELVDSVLDVVR.K              |
| HsFLAG-Control_HeLa_S10  | 5.8707 | 0.417  | 1960.53 | 1960.15 | 9914.1  | 1   | 3928.7 | 82.4                                             | 2  | K.GHYTEGAELVDSVLDVVR.K              |
| HsHeLa_Control-MG_Ti_20  | 6.9239 | 0.4578 | 1960.6  | 1960.15 | 10283.3 | 1   | 4222.7 | 85.3                                             | 8  | K.GHYTEGAELVDSVLDVVR.K              |
| HsHeLa_Control_Ti_105.38 | 6.5934 | 0.4301 | 1960.92 | 1960.15 | 9241.8  | 1   | 3541.4 | 82.4                                             | 7  | K.GHYTEGAELVDSVLDVVR.K              |

|                            |        |        |         |         |         |     |        |      |    |                                          |
|----------------------------|--------|--------|---------|---------|---------|-----|--------|------|----|------------------------------------------|
| HsFLAG-Control_HeLa_NE     | 4.632  | 0.1653 | 1961.1  | 1960.15 | 7796.1  | 7   | 1433.4 | 44.1 | 1  | K.GHYTEGAEVDSVLDVVR.K                    |
| HsHeLa_Control_Ti_105.38   | 3.9939 | 0.1774 | 1961.13 | 1960.15 | 6245.6  | 2   | 1192.6 | 45.6 | 2  | K.GHYTEGAEVDSVLDVVR.K                    |
| HsFLAG-Control_HeLa_S10    | 4.764  | 0.2325 | 1961.21 | 1960.15 | 8029.8  | 1   | 1535   | 42.6 | 2  | K.GHYTEGAEVDSVLDVVR.K                    |
| HsFLAG-Control_HeLa_S10    | 6.9041 | 0.4463 | 1961.25 | 1960.15 | 11475.7 | 1   | 4165.7 | 82.4 | 14 | K.GHYTEGAEVDSVLDVVR.K                    |
| HsFLAG-Control_HeLa_S10    | 5.9828 | 0.4073 | 1961.57 | 1960.15 | 10193.9 | 1   | 3020.1 | 76.5 | 5  | K.GHYTEGAEVDSVLDVVR.K                    |
| HsGST-MOCK_Ti_102.285      | 4.2626 | 0.1599 | 1962    | 1960.15 | 7062.2  | 4   | 1185.6 | 41.2 | 1  | K.GHYTEGAEVDSVLDVVR.K                    |
| Hs293FLP_Ti_306.3098.30    | 6.1016 | 0.4085 | 2088.19 | 2088.33 | 9030.4  | 1   | 2434   | 72.2 | 2  | K.GHYTEGAEVDSVLDVVRK.E                   |
| HsHeLa_Control_Ti_106.36   | 2.6425 | 0.3564 | 2089.18 | 2088.33 | 10954.4 | 1   | 669    | 41.7 | 1  | K.GHYTEGAEVDSVLDVVRK.E                   |
| HsFLAG-MOCK_300mM_T        | 4.8098 | 0.3951 | 2089.85 | 2088.33 | 6163.4  | 1   | 1098.1 | 41.7 | 3  | K.GHYTEGAEVDSVLDVVRK.E                   |
| Hs293FLP_Ti_305.3017.30    | 5.121  | 0.3371 | 2090.41 | 2088.33 | 6587.3  | 1   | 1579.1 | 48.6 | 9  | K.GHYTEGAEVDSVLDVVRK.E                   |
| Hs293FLP_Ti_303.2883.28    | 4.8438 | 0.3042 | 3329.53 | 3329.59 | 8954.5  | 1   | 943.2  | 25   | 1  | K.ESESCDCLQGFLTHSLGGGTGSGMGTLLISK.I      |
| HsFLAG-Control_HeLa_S10    | 2.9498 | 0.2063 | 1077.69 | 1078.17 | 5287.5  | 3   | 749.1  | 85.7 | 5  | K.IREEYPDR.I                             |
| HsFLAG-Control_MG_293_     | 3.7383 | 0.2202 | 1352.31 | 1352.65 | 8028.9  | 1   | 1182   | 72.7 | 2  | R.IMNTFSVMPSPK.V                         |
|                            |        |        |         |         |         |     |        |      |    | K.VSDTVVEPYNATLSVHQLVENTDETYCIDNEALYDICF |
|                            |        |        |         |         |         |     |        |      |    | 26 R.T                                   |
| HsFLAG-Control_HeLa_S10    | 5.2299 | 0.4574 | 4594.42 | 4595.9  | 5984.7  | 1   | 689.3  | 24.3 | 26 | R.T                                      |
| HsGST-MOCK_Ti_305.408      | 4.8022 | 0.4628 | 2708.4  | 2710.04 | 7804.4  | 1   | 972    | 43.8 | 1  | K.LTTPTYGDLNHLVSATMSGVTTCLR.F            |
| Hs293FLP-MG_Ti_204.386     | 5.4701 | 0.3771 | 2708.64 | 2710.04 | 9092.1  | 1   | 1386.9 | 45.8 | 2  | K.LTTPTYGDLNHLVSATMSGVTTCLR.F            |
| HsF-IP-293-MG_Ti_106.26    | 5.1039 | 0.31   | 2708.65 | 2710.04 | 6253.5  | 1   | 929.3  | 45.8 | 6  | K.LTTPTYGDLNHLVSATMSGVTTCLR.F            |
| Hs293FLP-MG_Ti_204.386     | 3.7503 | 0.32   | 2709.13 | 2710.04 | 7710.2  | 1   | 762.9  | 29.2 | 1  | K.LTTPTYGDLNHLVSATMSGVTTCLR.F            |
| HsHeLa_Control-MG_Ti_10    | 4.2137 | 0.4906 | 2709.32 | 2710.04 | 6602.6  | 1   | 706.6  | 39.6 | 1  | K.LTTPTYGDLNHLVSATMSGVTTCLR.F            |
| HsFLAG-MOCK_300mM_T        | 3.5898 | 0.1924 | 2709.57 | 2710.04 | 8016.1  | 2   | 734.5  | 28.1 | 1  | K.LTTPTYGDLNHLVSATMSGVTTCLR.F            |
| HsF-IP-293-MG_Ti_106.26    | 3.9395 | 0.217  | 2709.94 | 2710.04 | 7857.5  | 1   | 880.7  | 30.2 | 1  | K.LTTPTYGDLNHLVSATMSGVTTCLR.F            |
| HsHeLa3_Ti_105.3722.372    | 4.5547 | 0.4711 | 2710.06 | 2710.04 | 7677.4  | 1   | 1059.3 | 43.8 | 3  | K.LTTPTYGDLNHLVSATMSGVTTCLR.F            |
| HsHeLa_Control-MG_Ti_10    | 4.0048 | 0.2452 | 2712.04 | 2710.04 | 8274.3  | 1   | 1108.1 | 33.3 | 1  | K.LTTPTYGDLNHLVSATMSGVTTCLR.F            |
| HsFLAG-Control_293_Ti_20   | 2.3562 | 0.2676 | 1130.49 | 1131.28 | 3790.3  | 1   | 334.2  | 72.2 | 1  | R.FPGQLNADLR.K                           |
| HsFLAG-Control_HeLa_S10    | 3.3308 | 0.1729 | 1130.86 | 1131.28 | 4313.3  | 1   | 873.6  | 88.9 | 23 | R.FPGQLNADLR.K                           |
| HsFLAG-Control_MG_293_     | 3.206  | 0.113  | 1130.88 | 1131.28 | 3899.4  | 1   | 816.9  | 88.9 | 6  | R.FPGQLNADLR.K                           |
| HsFLAG-Control_HeLa_S10    | 2.9598 | 0.1628 | 1259.33 | 1259.45 | 6893.9  | 1   | 1452.3 | 90   | 5  | R.FPGQLNADLRK.L                          |
| HsHeLa_Control-MG_Ti_10    | 3.4275 | 0.2361 | 1272.73 | 1272.59 | 5940.6  | 2   | 973.4  | 75   | 2  | R.KLAVNMVPPFR.L                          |
| HsF-IP-293-MG_Ti_104.21    | 3.5921 | 0.3097 | 1145.56 | 1144.42 | 4625.3  | 1   | 875.9  | 88.9 | 19 | K.LAVNMVPPFR.L                           |
| HsGST-MOCK_Ti_102.257      | 3.0182 | 0.4314 | 1621.6  | 1621.94 | 4033.6  | 1   | 699.6  | 69.2 | 2  | R.LHFFMPGFAPLTSR.G                       |
| HsFLAG-Control_HeLa_S10    | 3.2928 | 0.2951 | 1708.57 | 1708.97 | 4062.4  | 1   | 387.6  | 57.1 | 15 | R.ALTVPELTQQMFDSK.N                      |
| HsHeLa-FLAG-IP_S100_Ti     | 2.9555 | 0.2199 | 1068.25 | 1066.2  | 7345.1  | 2   | 1221.1 | 81.2 | 2  | K.NMMAACDPR.H                            |
| HsGST-MOCK_Ti_402.200      | 3.2807 | 0.1162 | 1445.58 | 1447.6  | 4353.1  | 1   | 621.9  | 77.3 | 1  | K.EVDEQMLNVQNK.N                         |
| HsFLAG-Control_293_Ti_20   | 3.0439 | 0.1965 | 1446.48 | 1447.6  | 5427.8  | 1   | 667.1  | 72.7 | 2  | K.EVDEQMLNVQNK.N                         |
| HsHeLa_Control_Ti_102.15   | 2.3866 | 0.11   | 1446.59 | 1447.6  | 3600.8  | 3   | 304.9  | 63.6 | 1  | K.EVDEQMLNVQNK.N                         |
| HsFLAG-Control_MG_293_     | 3.1945 | 0.1644 | 1447.26 | 1447.6  | 5122.2  | 1   | 556.1  | 68.2 | 1  | K.EVDEQMLNVQNK.N                         |
| HsHeLa-FLAG-IP_S100_Ti     | 4.4378 | 0.162  | 1447.32 | 1447.6  | 7508.9  | 6   | 1453   | 77.3 | 14 | K.EVDEQMLNVQNK.N                         |
| HsFLAG-Control_HeLa_S10    | 2.6394 | 0.1147 | 1447.42 | 1447.6  | 5226.8  | 1   | 438.1  | 63.6 | 2  | K.EVDEQMLNVQNK.N                         |
| Hs293FLP-MG_Ti_102.177     | 3.6404 | 0.1591 | 1447.47 | 1447.6  | 6074.7  | 1   | 1112.2 | 72.7 | 2  | K.EVDEQMLNVQNK.N                         |
| HsFLAG-Control_HeLa_S10    | 4.4307 | 0.2086 | 1449.29 | 1447.6  | 7304.9  | 1   | 1751.9 | 86.4 | 2  | K.EVDEQMLNVQNK.N                         |
| HsFLAG-Control_HeLa_S10    | 4.2481 | 0.345  | 1697.72 | 1697.89 | 5597.6  | 1   | 913.8  | 69.2 | 79 | K.NSSYFVEWIPNNVK.T                       |
| HsHeLa-FLAG-IP_S100_Ti     | 2.8782 | 0.1885 | 1029.7  | 1029.15 | 5615.6  | 1   | 1184.8 | 87.5 | 8  | K.TAVCDIPPR.G                            |
| HsHeLa_Control-MG_Ti_10    | 3.5998 | 0.3059 | 1388.48 | 1386.61 | 7275    | 1   | 1173.3 | 80   | 3  | K.RISEQFTAMFR.R                          |
|                            |        |        |         |         |         |     |        |      |    | thioredoxin [Homo sapiens]               |
| gi 50592994 ref N          | 21     | 60     | 0.629   | 105     | 11737   | 4.9 | U      |      |    |                                          |
| * HsHeLa_Control_Ti_102.20 | 3.3435 | 0.3901 | 1336.52 | 1337.43 | 8359.5  | 1   | 1164.5 | 66.7 | 2  | K.TAFQEALDAAGDK.L                        |
| * HsHeLa_Control-MG_Ti_10  | 2.9578 | 0.2839 | 1336.64 | 1337.43 | 6841    | 1   | 741.1  | 62.5 | 2  | K.TAFQEALDAAGDK.L                        |
| * HsHeLa_Control-MG_Ti_20  | 4.1492 | 0.324  | 1337.1  | 1337.43 | 7916.5  | 1   | 2193.2 | 83.3 | 9  | K.TAFQEALDAAGDK.L                        |
| * HsFLAG-Control_Hela_Ti_1 | 2.8875 | 0.3608 | 1337.32 | 1337.43 | 7862    | 1   | 847.8  | 62.5 | 4  | K.TAFQEALDAAGDK.L                        |

|                   |                          |        |        |         |         |         |     |        |      |    |                                          |
|-------------------|--------------------------|--------|--------|---------|---------|---------|-----|--------|------|----|------------------------------------------|
| *                 | HsFLAG-Control_HeLa_NE   | 3.889  | 0.3334 | 1338.25 | 1337.43 | 7944.9  | 1   | 2199.3 | 83.3 | 15 | K.TAFQEALDAAGDK.L                        |
| *                 | HsHeLa_Control_Ti_102.20 | 3.6903 | 0.3284 | 1338.87 | 1337.43 | 6440.1  | 1   | 1646.8 | 79.2 | 3  | K.TAFQEALDAAGDK.L                        |
| *                 | HsGST-MOCK_Ti_104.2311   | 3.5719 | 0.4214 | 1740.08 | 1739.94 | 6837.1  | 1   | 682.2  | 57.1 | 2  | K.LVVVDFSATWCGPCK.M                      |
| *                 | HsHeLa_Control-MG_Ti_20  | 2.6602 | 0.1892 | 1091.46 | 1092.24 | 3911.9  | 3   | 399.9  | 75   | 1  | K.PFFHSLSEK.Y                            |
| *                 | Hs283FLP_Ti_106.2047.20  | 2.5599 | 0.2203 | 1091.55 | 1092.24 | 5791.9  | 6   | 502.1  | 68.8 | 2  | K.PFFHSLSEK.Y                            |
| *                 | HsHeLa_Control-MG_Ti_10  | 2.9018 | 0.1683 | 1091.65 | 1092.24 | 6019.9  | 3   | 593.4  | 75   | 1  | K.PFFHSLSEK.Y                            |
| *                 | Hs293FLP_Ti_305.1634.16  | 2.6892 | 0.1889 | 1091.78 | 1092.24 | 6016.9  | 2   | 603.9  | 75   | 2  | K.PFFHSLSEK.Y                            |
| *                 | HsHeLa_Control_Ti_106.28 | 2.5456 | 0.1519 | 1091.84 | 1092.24 | 5102.4  | 1   | 512.9  | 75   | 1  | K.PFFHSLSEK.Y                            |
| *                 | Hs293FLP_TREX_Ti_105.1   | 3.0961 | 0.2806 | 1092.1  | 1092.24 | 5078.6  | 1   | 734.9  | 81.2 | 1  | K.PFFHSLSEK.Y                            |
| *                 | HsHeLa_Control-MG_Ti_20  | 2.9273 | 0.2509 | 1092.26 | 1092.24 | 5642.8  | 1   | 785.3  | 81.2 | 1  | K.PFFHSLSEK.Y                            |
| *                 | HsHeLa_Control-MG_Ti_10  | 2.8934 | 0.2602 | 1092.65 | 1092.24 | 4162.4  | 1   | 651.5  | 81.2 | 2  | K.PFFHSLSEK.Y                            |
| *                 | Hs293FLP_Ti_305.1633.16  | 2.9315 | 0.2394 | 1092.99 | 1092.24 | 4433.4  | 2   | 713.6  | 81.2 | 2  | K.PFFHSLSEK.Y                            |
| *                 | HsHeLa_Control_Ti_106.28 | 3.1852 | 0.2499 | 1094    | 1092.24 | 4151.8  | 1   | 761    | 87.5 | 3  | K.PFFHSLSEK.Y                            |
| *                 | HsGST-MOCK_Ti_405.3071   | 2.7162 | 0.3148 | 1206.15 | 1206.41 | 2803.2  | 1   | 510.4  | 81.2 | 1  | K.CMPTFQFFK.K                            |
| *                 | HsFLAG-Control_Hela_Ti_1 | 3.2113 | 0.1961 | 909.52  | 908.987 | 6888.4  | 1   | 1430.1 | 93.8 | 1  | K.VGEFSGANK.E                            |
| *                 | HsFlag1P_Ti_105.3223.322 | 2.6133 | 0.1474 | 2149.65 | 2149.41 | 10329.3 | 2   | 601.4  | 39.5 | 2  | K.VGEFSGANKEKLEATINELV.-                 |
| *                 | HsHeLa_Control-MG_Ti_20  | 3.877  | 0.1777 | 1260.57 | 1259.44 | 9965    | 3   | 1944.3 | 90   | 3  | K.EKLEATINELV.-                          |
| gij4501885 ref NF |                          | 44     | 365    | 0.627   | 375     | 41737   | 5.5 | U      |      |    | beta actin [Homo sapiens]                |
| gij4501887 ref NF |                          | 44     | 365    | 0.627   | 375     | 41793   | 5.5 | U      |      |    | actin, gamma 1 propeptide [Homo sapiens] |
|                   | HsFLAG-Control_HeLa_S10  | 2.2896 | 0.2133 | 976.42  | 977.021 | 5697.3  | 5   | 418.5  | 61.1 | 1  | K.AGFAGDDAPR.A                           |
|                   | HsFLAG-Control_Hela_Ti_1 | 3.0127 | 0.1884 | 976.63  | 977.021 | 5102.4  | 1   | 1237.5 | 88.9 | 9  | K.AGFAGDDAPR.A                           |
|                   | HsHeLa_Control_Ti_102.11 | 2.1727 | 0.108  | 976.67  | 977.021 | 4557.8  | 2   | 513.5  | 66.7 | 1  | K.AGFAGDDAPR.A                           |
|                   | HsFLAG-MOCK_150mM_T      | 3.2886 | 0.2636 | 978.67  | 977.021 | 5248.4  | 1   | 1406.5 | 88.9 | 20 | K.AGFAGDDAPR.A                           |
|                   | HsFLAG-Control_HeLa_S10  | 2.6516 | 0.2088 | 946.02  | 946.137 | 3258.8  | 2   | 623.5  | 87.5 | 1  | R.AVFPSIVGR.P                            |
|                   | HsFLAG-MOCK_300mM_T      | 3.5305 | 0.3215 | 1199.52 | 1199.44 | 7004.5  | 2   | 801.6  | 75   | 15 | R.AVFPSIVGRPR.H                          |
|                   | HsFLAG-MOCK_300mM_T      | 2.8034 | 0.3247 | 1171.52 | 1172.41 | 5485.7  | 1   | 609.4  | 65   | 3  | R.HQGVMVGMGQK.D                          |
|                   | HsHeLa3_Ti_106.1966.196  | 2.937  | 0.3448 | 1171.61 | 1172.41 | 5543.4  | 1   | 647.3  | 65   | 2  | R.HQGVMVGMGQK.D                          |
|                   | HsHeLa3_Ti_106.1967.196  | 3.1676 | 0.3309 | 1172.92 | 1172.41 | 4063.3  | 1   | 693.8  | 80   | 1  | R.HQGVMVGMGQK.D                          |
|                   | HsFLAG-MOCK_300mM_T      | 3.105  | 0.361  | 1173.72 | 1172.41 | 4167.5  | 1   | 841.2  | 85   | 2  | R.HQGVMVGMGQK.D                          |
|                   | HsFLAG-MOCK_300mM_T      | 5.2956 | 0.4824 | 2351.94 | 2352.6  | 7863.3  | 1   | 2199.1 | 66.7 | 2  | R.HQGVMVGMGQKDSYVGDEAQS.K.R              |
|                   | HsFLAG-Control_HeLa_S10  | 3.424  | 0.33   | 1199.08 | 1199.22 | 4776.6  | 2   | 971.4  | 85   | 4  | K.DSYVGDEAQS.K.R                         |
|                   | HsFLAG-Control_Hela_Ti_1 | 3.2795 | 0.3331 | 1515.45 | 1516.7  | 7777.5  | 1   | 997.2  | 75   | 12 | K.IWHHTFYNELR.V                          |
|                   | HsFLAG-MOCK_300mM_T      | 2.4013 | 0.1049 | 1515.69 | 1516.7  | 5047.5  | 1   | 338.5  | 60   | 1  | K.IWHHTFYNELR.V                          |
|                   | HsHeLa_Control-MG_Ti_10  | 3.3547 | 0.3682 | 1518.65 | 1516.7  | 5691.8  | 1   | 740.7  | 75   | 4  | K.IWHHTFYNELR.V                          |
|                   | HsFLAG-Control_Hela_Ti_1 | 3.8269 | 0.0974 | 1954.23 | 1955.26 | 7101.3  | 7   | 678.1  | 35.3 | 1  | R.VAPEEHPVLLTEAPLNPK.A                   |
|                   | HsFLAG-Control_Hela_Ti_1 | 4.4739 | 0.3418 | 1954.47 | 1955.26 | 5423.1  | 1   | 777.4  | 58.8 | 12 | R.VAPEEHPVLLTEAPLNPK.A                   |
|                   | HsFLAG-Control_HeLa_NE   | 4.4438 | 0.3998 | 1954.64 | 1955.26 | 5966.4  | 1   | 906.2  | 61.8 | 6  | R.VAPEEHPVLLTEAPLNPK.A                   |
|                   | HsGST-MOCK_Ti_405.2311   | 3.9785 | 0.3952 | 1954.64 | 1955.26 | 5779.6  | 1   | 1049.7 | 61.8 | 4  | R.VAPEEHPVLLTEAPLNPK.A                   |
|                   | HsFLAG-Control_MG_293_   | 4.2926 | 0.3247 | 1954.65 | 1955.26 | 5827.3  | 1   | 937    | 61.8 | 60 | R.VAPEEHPVLLTEAPLNPK.A                   |
|                   | HsFLAG-Control_HeLa_NE   | 4.4704 | 0.2283 | 1954.69 | 1955.26 | 5597.7  | 1   | 725.8  | 58.8 | 4  | R.VAPEEHPVLLTEAPLNPK.A                   |
|                   | Hs293FLP_TREX_Ti_105.1   | 4.5388 | 0.3216 | 1954.7  | 1955.26 | 4902.1  | 1   | 936.6  | 64.7 | 5  | R.VAPEEHPVLLTEAPLNPK.A                   |
|                   | HsFLAG-Control_HeLa_S10  | 4.6473 | 0.2961 | 1954.79 | 1955.26 | 5345.4  | 1   | 959.7  | 64.7 | 20 | R.VAPEEHPVLLTEAPLNPK.A                   |
|                   | HsFLAG-Control_MG_293_   | 3.6843 | 0.1385 | 1955.26 | 1955.26 | 5777.1  | 4   | 796.8  | 41.2 | 2  | R.VAPEEHPVLLTEAPLNPK.A                   |
|                   | HsFLAG-Control_HeLa_NE   | 3.7445 | 0.1366 | 1955.27 | 1955.26 | 6564.5  | 7   | 873.5  | 41.2 | 1  | R.VAPEEHPVLLTEAPLNPK.A                   |
|                   | Hs293FLP_TREX_Ti_104.1   | 3.6692 | 0.1216 | 1955.37 | 1955.26 | 5613.2  | 1   | 815.8  | 41.2 | 1  | R.VAPEEHPVLLTEAPLNPK.A                   |
|                   | HsHeLa_Control-MG_Ti_20  | 4.5848 | 0.3256 | 1955.51 | 1955.26 | 6431.6  | 1   | 1337.4 | 70.6 | 13 | R.VAPEEHPVLLTEAPLNPK.A                   |
|                   | Hs283FLP_Ti_105.1739.17  | 3.5091 | 0.1499 | 1955.54 | 1955.26 | 5622.7  | 5   | 612.3  | 36.8 | 1  | R.VAPEEHPVLLTEAPLNPK.A                   |
|                   | HsFLAG-Control_HeLa_S10  | 3.8414 | 0.1501 | 1956.46 | 1955.26 | 6047.5  | 7   | 626.7  | 38.2 | 2  | R.VAPEEHPVLLTEAPLNPK.A                   |
|                   | HsFLAG-Control_HeLa_NE   | 4.2177 | 0.1933 | 1956.92 | 1955.26 | 6916.3  | 2   | 647.7  | 39.7 | 1  | R.VAPEEHPVLLTEAPLNPK.A                   |

|                   |                          |        |        |         |         |        |     |        |      |    |                                        |
|-------------------|--------------------------|--------|--------|---------|---------|--------|-----|--------|------|----|----------------------------------------|
|                   | HsHeLa3_Ti_106.2603.260  | 4.5221 | 0.3038 | 3185.19 | 3185.62 | 3947.7 | 1   | 407.6  | 36.2 | 2  | R.TTGIVMDSGDGVTHTVPIYEGYALPHAILR.L     |
|                   | HsHeLa_Control-MG_Ti_20  | 5.6034 | 0.4079 | 3185.37 | 3185.62 | 8847.7 | 1   | 1345   | 31   | 8  | R.TTGIVMDSGDGVTHTVPIYEGYALPHAILR.L     |
|                   | HsHeLa_Control_Ti_105.33 | 6.0472 | 0.4346 | 3185.58 | 3185.62 | 9179.9 | 1   | 1261.4 | 29.3 | 2  | R.TTGIVMDSGDGVTHTVPIYEGYALPHAILR.L     |
|                   | HsFLAG-Control_293_Ti_20 | 2.3671 | 0.1397 | 1000.32 | 999.167 | 7387.7 | 9   | 624.4  | 71.4 | 2  | R.DLTDYLMK.I                           |
|                   | HsFLAG-Control_HeLa_S10  | 3.2887 | 0.3754 | 1132.75 | 1133.2  | 6769.6 | 1   | 1138.7 | 83.3 | 26 | R.GYSFTTTAER.E                         |
|                   | HsFLAG-MOCK_300mM_T      | 5.7804 | 0.3874 | 2551.51 | 2551.79 | 8558.6 | 1   | 2302.9 | 56.8 | 20 | K.LCYVALDFEQEMATAASSSSLEK.S            |
|                   | HsHeLa_Control-MG_Ti_20  | 5.1912 | 0.2593 | 1792.4  | 1791.96 | 5309.1 | 1   | 1957.5 | 86.7 | 61 | K.SYELPDGQVITIGNER.F                   |
|                   | HsFLAG-MOCK_300mM_T      | 5.6387 | 0.4443 | 3536.82 | 3536.97 | 6318.9 | 1   | 919.9  | 29.3 | 3  | R.FRCPEALFQPSFLGMESCGIHETTFFNSIMK.C    |
|                   | HsHeLa3_Ti_105.3498.349  | 4.399  | 0.2568 | 3233.57 | 3233.61 | 4293.9 | 1   | 705.7  | 31.5 | 1  | R.CPEALFQPSFLGMESCGIHETTFFNSIMK.C      |
|                   | HsFLAG-MOCK_300mM_T      | 4.9064 | 0.4874 | 2343.92 | 2344.65 | 6226.7 | 1   | 1722.2 | 64.3 | 2  | R.KDLYANTVLSGGTMYPGIADR.M              |
|                   | HsFLAG-MOCK_300mM_T      | 4.3364 | 0.3584 | 2346.26 | 2344.65 | 5622.9 | 2   | 591.4  | 33.3 | 1  | R.KDLYANTVLSGGTMYPGIADR.M              |
|                   | HsFLAG-MOCK_150mM_T      | 4.7935 | 0.5235 | 2215.81 | 2216.47 | 7675.6 | 1   | 763.5  | 50   | 14 | K.DLYANTVLSGGTMYPGIADR.M               |
|                   | HsHeLa_Control-MG_Ti_10  | 2.6274 | 0.294  | 1161.67 | 1162.39 | 4080.9 | 1   | 437    | 65   | 10 | K.EITALAPSTMK.I                        |
|                   | HsFLAG-Control_Hela_Ti_1 | 2.701  | 0.0863 | 1517.89 | 1517.6  | 5879.3 | 1   | 499.9  | 58.3 | 1  | K.QEYDESGSIVHR.K                       |
| gi 31742498 ref N |                          | 80     | 582    | 0.623   | 717     | 80311  | 6.7 | U      |      |    | unc-84 homolog B [Homo sapiens]        |
| *                 | HsF-IP-293_Ti_102.1500.1 | 6.142  | 0.4716 | 2512.37 | 2512.52 | 8480.2 | 1   | 1440.3 | 50   | 21 | R.YSQGDDDDGSSSSGGSSVAGSQSTLKF.D        |
| *                 | HsF-IP-293_Ti_206.2292.2 | 4.686  | 0.4006 | 1928.57 | 1929.01 | 6497.8 | 1   | 1632   | 71.9 | 11 | R.SSLEELHGDANWGEDLR.V                  |
| *                 | HsF-IP-293-MG_Ti_106.21  | 4.6737 | 0.3774 | 1928.71 | 1929.01 | 6103.8 | 1   | 2152   | 81.2 | 4  | R.SSLEELHGDANWGEDLR.V                  |
| *                 | Hs283FLP_Ti_105.1810.18  | 4.0428 | 0.1293 | 1930.33 | 1929.01 | 6252.9 | 1   | 978.3  | 39.1 | 1  | R.SSLEELHGDANWGEDLR.V                  |
| *                 | HsF-IP-293_Ti_206.2259.2 | 5.3197 | 0.515  | 3555.31 | 3555.57 | 7012.3 | 1   | 1102.7 | 28.1 | 3  | R.KATEDFLGSSSGYSSSEDDYVGYSVDVQQSSSSR.L |
| *                 | Hs283FLP_Ti_106.2743.27  | 4.0575 | 0.3243 | 1617.58 | 1616.86 | 7502.1 | 1   | 1253.5 | 72.7 | 2  | R.LLYWWAGTTWYR.L                       |
| *                 | Hs283FLP_Ti_104.3371.33  | 4.889  | 0.352  | 1621.74 | 1620.93 | 7726.9 | 1   | 1361.6 | 71.4 | 13 | R.LTTAASLLDVFLTR.R                     |
| *                 | Hs283FLP_Ti_103.1208.12  | 1.9266 | 0.2356 | 1115.56 | 1116.18 | 3152.7 | 1   | 211.3  | 56.2 | 1  | R.RPDEGWEAR.D                          |
| *                 | Hs293FLP_TREX_Ti_103.1   | 3.1    | 0.1815 | 1116.44 | 1116.18 | 5645.4 | 2   | 958.7  | 87.5 | 5  | R.RPDEGWEAR.D                          |
| *                 | HsHeLa_Control-MG_Ti_10  | 2.9958 | 0.1689 | 1117.13 | 1116.18 | 5686.2 | 1   | 897.7  | 81.2 | 2  | R.RPDEGWEAR.D                          |
| *                 | Hs283FLP_Ti_103.1110.11  | 2.5872 | 0.3508 | 1301.55 | 1302.35 | 2923.2 | 1   | 272.1  | 60   | 2  | R.DSSPHFQAEQR.V                        |
| *                 | Hs293FLP_TREX_Ti_102.1   | 3.1576 | 0.3374 | 1302.47 | 1302.35 | 6803.9 | 2   | 942    | 75   | 10 | R.DSSPHFQAEQR.V                        |
| *                 | HsHeLa_Control-MG_Ti_10  | 3.3076 | 0.2467 | 1302.61 | 1302.35 | 6148.4 | 1   | 786.4  | 70   | 2  | R.DSSPHFQAEQR.V                        |
| *                 | Hs283FLP_Ti_106.2360.23  | 5.5293 | 0.4717 | 1750.76 | 1750.95 | 9385.2 | 1   | 2144.9 | 78.6 | 6  | R.LEALAAEFSSNWQK.E                     |
| *                 | HsF-IP-293-MG_Ti_102.24  | 4.9074 | 0.3831 | 1594.64 | 1594.76 | 8466.4 | 1   | 2103   | 80.8 | 9  | R.LEALAAEFSSNWQK.E                     |
| *                 | HsF-IP-293-MG_Ti_106.25  | 3.5132 | 0.353  | 2576.86 | 2577.81 | 4989.7 | 1   | 270.9  | 32.7 | 2  | R.QGAPQGGGGGLSHEDTLALLEGLVSR.R         |
| *                 | Hs293FLP-MG_Ti_204.356   | 4.4306 | 0.2825 | 2577.25 | 2577.81 | 6066.1 | 1   | 580.9  | 26   | 2  | R.QGAPQGGGGGLSHEDTLALLEGLVSR.R         |
| *                 | Hs293FLP-MG_Ti_204.356   | 3.8706 | 0.4394 | 2578.08 | 2577.81 | 8229.7 | 1   | 429.9  | 32.7 | 2  | R.QGAPQGGGGGLSHEDTLALLEGLVSR.R         |
| *                 | HsF-IP-293-MG_Ti_106.25  | 4.642  | 0.2933 | 2578.24 | 2577.81 | 5397.2 | 1   | 864.7  | 32.7 | 2  | R.QGAPQGGGGGLSHEDTLALLEGLVSR.R         |
| *                 | HsHeLa_Control-MG_Ti_20  | 3.074  | 0.3302 | 2578.4  | 2577.81 | 2923.6 | 2   | 117.7  | 32.7 | 1  | R.QGAPQGGGGGLSHEDTLALLEGLVSR.R         |
| *                 | HsFLAG-Control_Hela_Ti_1 | 3.7546 | 0.3881 | 2578.41 | 2577.81 | 5918   | 1   | 619.1  | 26.9 | 1  | R.QGAPQGGGGGLSHEDTLALLEGLVSR.R         |
| *                 | HsHeLa_Control_Ti_104.38 | 3.7867 | 0.362  | 2578.47 | 2577.81 | 7156   | 1   | 418.2  | 32.7 | 3  | R.QGAPQGGGGGLSHEDTLALLEGLVSR.R         |
| *                 | HsFLAG-Control_Hela_Ti_1 | 3.0055 | 0.3391 | 2578.48 | 2577.81 | 9435.5 | 1   | 423.9  | 32.7 | 1  | R.QGAPQGGGGGLSHEDTLALLEGLVSR.R         |
| *                 | HsHeLa_Control_Ti_104.38 | 3.7384 | 0.2154 | 2579.16 | 2577.81 | 4968.5 | 1   | 589.6  | 27.9 | 1  | R.QGAPQGGGGGLSHEDTLALLEGLVSR.R         |
| *                 | Hs293FLP_Ti_303.3269.32  | 4.7609 | 0.2823 | 2580.12 | 2577.81 | 4303.5 | 3   | 464.4  | 26.9 | 7  | R.QGAPQGGGGGLSHEDTLALLEGLVSR.R         |
| *                 | Hs283FLP_Ti_106.2161.21  | 4.2075 | 0.3133 | 2487.93 | 2487.69 | 7128.9 | 1   | 614.7  | 42.5 | 1  | R.IQEELSALRAEHQQDSEDLFK.K              |
| *                 | HsF-IP-293-MG_Ti_106.22  | 4.5062 | 0.3187 | 2489.26 | 2487.69 | 5733.4 | 1   | 1123   | 40   | 1  | R.IQEELSALRAEHQQDSEDLFK.K              |
| *                 | Hs283FLP_Ti_102.1487.14  | 3.6156 | 0.3002 | 1447.61 | 1447.5  | 6499.5 | 1   | 1287.5 | 81.8 | 1  | R.AEHQQDSEDLFK.K                       |
| *                 | Hs283FLP_Ti_104.1277.12  | 3.9067 | 0.3724 | 1575.77 | 1575.68 | 9173.9 | 1   | 1690   | 79.2 | 4  | R.AEHQQDSEDLFK.I                       |
| *                 | HsF-IP-293-MG_Ti_104.18  | 4.7357 | 0.4502 | 2019.78 | 2019.15 | 7437.9 | 1   | 1185.7 | 62.5 | 13 | K.SEWQSMTQESFQESSVK.E                  |
| *                 | Hs293FLP-MG_Ti_204.425   | 5.185  | 0.3172 | 2079.65 | 2081.42 | 6746.3 | 1   | 1737.2 | 66.7 | 5  | R.LEDQLAGLQQELAALALK.Q                 |
| *                 | HsHeLa_Control-MG_Ti_20  | 4.8613 | 0.3997 | 2080.08 | 2081.42 | 7794.6 | 1   | 2433.6 | 72.2 | 3  | R.LEDQLAGLQQELAALALK.Q                 |
| *                 | Hs293FLP-MG_Ti_204.422   | 6.0426 | 0.3036 | 2080.7  | 2081.42 | 9532.4 | 1   | 3156   | 51.4 | 2  | R.LEDQLAGLQQELAALALK.Q                 |

|                   |                          |        |        |         |         |        |     |        |      |     |                                                                    |
|-------------------|--------------------------|--------|--------|---------|---------|--------|-----|--------|------|-----|--------------------------------------------------------------------|
| *                 | HsFLAG-Control_Hela_Ti_1 | 4.6457 | 0.4157 | 2080.74 | 2081.42 | 8299   | 1   | 1842.1 | 66.7 | 18  | R.RLEDQLAGLQQELAALALK.Q                                            |
| *                 | HsHeLa_Control_Ti_105.42 | 6.9015 | 0.2504 | 2080.92 | 2081.42 | 7879   | 1   | 2733.1 | 51.4 | 4   | R.RLEDQLAGLQQELAALALK.Q                                            |
| *                 | Hs293FLP_Ti_305.3695.36  | 5.2037 | 0.3459 | 2081.39 | 2081.42 | 6444   | 1   | 1923.5 | 69.4 | 5   | R.RLEDQLAGLQQELAALALK.Q                                            |
| *                 | HsHeLa_Control-MG_Ti_10  | 6.2679 | 0.2595 | 2081.46 | 2081.42 | 8023.4 | 1   | 3295.1 | 54.2 | 3   | R.RLEDQLAGLQQELAALALK.Q                                            |
| *                 | HsHeLa_Control_Ti_106.38 | 5.7375 | 0.337  | 2081.58 | 2081.42 | 8151.2 | 1   | 2673.8 | 75   | 8   | R.RLEDQLAGLQQELAALALK.Q                                            |
| *                 | HsHeLa_Control-MG_Ti_20  | 6.1532 | 0.2982 | 2081.87 | 2081.42 | 8425.1 | 1   | 2264.5 | 45.8 | 2   | R.RLEDQLAGLQQELAALALK.Q                                            |
| *                 | Hs293FLP_Ti_303.3857.38  | 6.909  | 0.3045 | 2083.56 | 2081.42 | 8066.1 | 1   | 2551.4 | 48.6 | 5   | R.RLEDQLAGLQQELAALALK.Q                                            |
| *                 | Hs293FLP_Ti_302.4004.40  | 5.3946 | 0.3503 | 1926.81 | 1925.23 | 4251.3 | 1   | 885.8  | 64.7 | 16  | R.LEDQLAGLQQELAALALK.Q                                             |
| *                 | HsF-IP-293_Ti_202.0114.0 | 3.8926 | 0.1987 | 2052.81 | 2053.32 | 4643.4 | 1   | 848.7  | 63.9 | 7   | K.QSSVAEEVGLLPQQIQAVR.D                                            |
| *                 | Hs293FLP-MG_Ti_202.324   | 3.7047 | 0.283  | 2052.96 | 2053.32 | 4975.9 | 1   | 697.2  | 55.6 | 2   | K.QSSVAEEVGLLPQQIQAVR.D                                            |
| *                 | Hs283FLP_Ti_102.2591.25  | 4.3656 | 0.2452 | 2053.67 | 2053.32 | 4247.9 | 1   | 787.4  | 40.3 | 1   | K.QSSVAEEVGLLPQQIQAVR.D                                            |
| *                 | HsF-IP-293-MG_Ti_102.25  | 4.4326 | 0.2753 | 2053.9  | 2053.32 | 4667.4 | 1   | 1104.8 | 66.7 | 2   | K.QSSVAEEVGLLPQQIQAVR.D                                            |
| *                 | HsF-IP-293-MG_Ti_102.25  | 4.5051 | 0.2453 | 2055.4  | 2053.32 | 4441.6 | 1   | 997.6  | 43.1 | 1   | K.QSSVAEEVGLLPQQIQAVR.D                                            |
| *                 |                          |        |        |         |         |        |     |        |      |     | K.QSSVAEEVGLLPQQIQAVRDDVESQFPWISQFLAR.                             |
| *                 | HsHeLa_Control-MG_Ti_20  | 4.9307 | 0.351  | 4045.21 | 4044.51 | 5995.5 | 1   | 531.2  | 21.4 | 4   | G                                                                  |
| *                 | Hs293FLP-MG_Ti_202.504   | 4.8808 | 0.4424 | 2009.22 | 2010.21 | 4736.7 | 1   | 1018.1 | 68.8 | 2   | R.DDVESQFPWISQFLAR.G                                               |
| *                 | HsHeLa_Control-MG_Ti_20  | 3.8701 | 0.2031 | 2009.49 | 2010.21 | 9415.8 | 1   | 1699.6 | 43.8 | 1   | R.DDVESQFPWISQFLAR.G                                               |
| *                 | Hs283FLP_Ti_104.3633.36  | 5.4705 | 0.2818 | 2009.5  | 2010.21 | 4144   | 1   | 980    | 68.8 | 14  | R.DDVESQFPWISQFLAR.G                                               |
| *                 | HsHeLa_Control-MG_Ti_20  | 4.8622 | 0.2937 | 2009.52 | 2010.21 | 5834.9 | 1   | 1047.7 | 65.6 | 7   | R.DDVESQFPWISQFLAR.G                                               |
| *                 | Hs283FLP_Ti_103.3743.37  | 4.1924 | 0.1796 | 2009.7  | 2010.21 | 8567.1 | 1   | 1229.8 | 43.8 | 2   | R.DDVESQFPWISQFLAR.G                                               |
| *                 | HsF-IP-293-MG_Ti_102.40  | 4.3393 | 0.2854 | 2010.66 | 2010.21 | 7677.8 | 2   | 1141.8 | 43.8 | 3   | R.DDVESQFPWISQFLAR.G                                               |
| *                 | Hs293FLP_Ti_302.4430.44  | 4.1678 | 0.281  | 2011.56 | 2010.21 | 3954.1 | 1   | 643.1  | 59.4 | 8   | R.DDVESQFPWISQFLAR.G                                               |
| *                 | HsF-IP-293-MG_Ti_104.14  | 2.9761 | 0.263  | 1226.45 | 1227.46 | 5541.2 | 1   | 857.3  | 70   | 2   | K.ILTHVAEMQ GK.S                                                   |
| *                 | HsF-IP-293_Ti_205.1567.1 | 2.4039 | 0.2839 | 1226.45 | 1227.46 | 6211.6 | 1   | 544.5  | 55   | 3   | K.ILTHVAEMQ GK.S                                                   |
| *                 | Hs293FLP-MG_Ti_105.145   | 3.0324 | 0.2682 | 1226.7  | 1227.46 | 6172.1 | 1   | 1000.8 | 70   | 2   | K.ILTHVAEMQ GK.S                                                   |
| *                 | HsFLAG-Control_293_Ti_2  | 2.9755 | 0.3764 | 1226.97 | 1227.46 | 8260.8 | 1   | 985.3  | 70   | 2   | K.ILTHVAEMQ GK.S                                                   |
| *                 | Hs293FLP_TREX_Ti_104.1   | 3.7987 | 0.4243 | 1227.33 | 1227.46 | 6375.9 | 1   | 1627.1 | 90   | 5   | K.ILTHVAEMQ GK.S                                                   |
| *                 | HsFLAG-Control_293_Ti_2  | 3.0711 | 0.2881 | 1227.42 | 1227.46 | 7340   | 1   | 957.9  | 70   | 4   | K.ILTHVAEMQ GK.S                                                   |
| *                 | HsF-IP-293-MG_Ti_104.14  | 2.9994 | 0.3643 | 1228.38 | 1227.46 | 6491   | 1   | 1538.1 | 90   | 2   | K.ILTHVAEMQ GK.S                                                   |
| *                 | Hs293FLP-MG_Ti_105.145   | 3.0333 | 0.2461 | 1229.3  | 1227.46 | 6089.4 | 1   | 1383.8 | 85   | 3   | K.ILTHVAEMQ GK.S                                                   |
| *                 | Hs283FLP_Ti_102.1799.17  | 3.5903 | 0.2835 | 1233.47 | 1232.42 | 6589.2 | 1   | 1393.4 | 86.4 | 9   | R.EAAASLSLTLQK.E                                                   |
| *                 | HsF-IP-293-MG_Ti_106.22  | 4.0328 | 0.3565 | 1774.72 | 1775.02 | 7714.2 | 1   | 657.6  | 50   | 14  | K.EGVIGVTEEQVHHIVK.Q                                               |
| *                 | Hs293FLP-MG_Ti_202.316   | 5.1113 | 0.4707 | 1880.23 | 1881.09 | 8616   | 1   | 1889.7 | 63.9 | 3   | R.IGLADYALESGGASVISTR.C                                            |
| *                 | HsF-IP-293-MG_Ti_102.26  | 5.2138 | 0.5069 | 1880.75 | 1881.09 | 8145.1 | 1   | 1849.7 | 66.7 | 34  | R.IGLADYALESGGASVISTR.C                                            |
| *                 | HsF-IP-293-MG_Ti_102.24  | 3.901  | 0.3255 | 1881.18 | 1881.09 | 5648   | 1   | 1210.4 | 44.4 | 1   | R.IGLADYALESGGASVISTR.C                                            |
| *                 | HsHeLa_Control-MG_Ti_20  | 5.5212 | 0.4364 | 1881.46 | 1881.09 | 9954.6 | 1   | 2422.7 | 66.7 | 39  | R.IGLADYALESGGASVISTR.C                                            |
| *                 | Hs283FLP_Ti_104.2236.22  | 4.2104 | 0.273  | 1882.11 | 1881.09 | 5673.4 | 1   | 1290   | 43.1 | 6   | R.IGLADYALESGGASVISTR.C                                            |
| *                 | HsHeLa_Control-MG_Ti_20  | 3.9111 | 0.3384 | 2186.94 | 2187.55 | 3943.6 | 1   | 311.2  | 44.4 | 4   | K.TALLSLFGIPLWYHSQSPR.V                                            |
| *                 | Hs293FLP-MG_Ti_206.355   | 3.31   | 0.3151 | 2187.18 | 2187.55 | 4151   | 1   | 366.9  | 44.4 | 1   | K.TALLSLFGIPLWYHSQSPR.V                                            |
| *                 | Hs293FLP_Ti_306.3495.34  | 3.3151 | 0.1938 | 2188.85 | 2187.55 | 3030.9 | 1   | 416.3  | 55.6 | 2   | K.TALLSLFGIPLWYHSQSPR.V                                            |
| *                 | Hs293FLP_Ti_306.3499.34  | 3.5735 | 0.2465 | 2189.01 | 2187.55 | 6115.6 | 1   | 1138.3 | 43.1 | 1   | K.TALLSLFGIPLWYHSQSPR.V                                            |
| *                 | HsHeLa_Control-MG_Ti_20  | 3.6716 | 0.2277 | 2189.05 | 2187.55 | 6699.3 | 3   | 855.8  | 37.5 | 1   | K.TALLSLFGIPLWYHSQSPR.V                                            |
| *                 | HsFLAG-Control_Hela_Ti_1 | 3.1362 | 0.3552 | 2793.12 | 2794.15 | 5698.8 | 1   | 347.2  | 33.3 | 1   | R.VILQPDVHPGNCWAFQGPQGFAVVR.L                                      |
| *                 | Hs293FLP_TREX_Ti_106.2   | 3.7183 | 0.2738 | 1461.78 | 1461.75 | 4249.6 | 3   | 510.6  | 62.5 | 12  | R.IRPTAVTLEHVPK.A                                                  |
| *                 | HsF-IP-293_Ti_206.2870.2 | 6.7284 | 0.486  | 2243.73 | 2244.46 | 9538.5 | 1   | 2681.8 | 71.1 | 153 | K.DFAIFGFDEDLQQEGTLLGK.F                                           |
| *                 | HsF-IP-293-MG_Ti_106.25  | 5.5466 | 0.4251 | 3435.12 | 3434.8  | 4401   | 1   | 691.1  | 32.1 | 6   | K.FTYDQDGEPIQTFHFQAPTMATYQVVELR.I                                  |
| *                 | HsHeLa_Control-MG_Ti_20  | 4.3931 | 0.3552 | 1923.44 | 1924.13 | 4394   | 1   | 598.2  | 64.3 | 10  | R.ILTNWGHPEYTCIYR.F                                                |
| *                 | Hs283FLP_Ti_106.1784.17  | 2.8277 | 0.1803 | 1051.8  | 1050.17 | 5153.2 | 2   | 852.2  | 87.5 | 3   | R.FRVHGEPAH.-                                                      |
| gij14165435 ref N |                          | 57     | 489    | 0.579   | 463     | 50976  | 5.5 | U      |      |     | heterogeneous nuclear ribonucleoprotein K isoform b [Homo sapiens] |

|                          |        |        |         |         |         |       |                                                                    |      |     |                                                                         |
|--------------------------|--------|--------|---------|---------|---------|-------|--------------------------------------------------------------------|------|-----|-------------------------------------------------------------------------|
| gij 14165439 ref N       | 57     | 489    | 0.578   | 464     | 51028   | 5.3 U | heterogeneous nuclear ribonucleoprotein K isoform a [Homo sapiens] |      |     |                                                                         |
| gij 14165437 ref N       | 57     | 489    | 0.578   | 464     | 51028   | 5.3 U | heterogeneous nuclear ribonucleoprotein K isoform a [Homo sapiens] |      |     |                                                                         |
| Hs293FLP_Ti_303.1398.13  | 4.125  | 0.4016 | 1581.63 | 1580.71 | 8342.4  | 1     | 1509.3                                                             | 75   | 2   | K.RPAEDMEEEQAFK.R                                                       |
| HsHeLa_Control-MG_Ti_10  | 1.8661 | 0.1184 | 729.7   | 729.855 | 4355.3  | 2     | 448.9                                                              | 71.4 | 1   | K.NAGAVIGK.G                                                            |
| HsFLAG-MOCK_300mM_T      | 4.6585 | 0.4487 | 2122.19 | 2122.26 | 4379.4  | 1     | 829.8                                                              | 63.2 | 3   | K.ALRTDYNASVSPDSSGPER.I                                                 |
| HsFLAG-Control_HeLa_S10  | 3.8982 | 0.3134 | 1783.58 | 1781.83 | 4744.9  | 1     | 749.1                                                              | 62.5 | 49  | R.TDYNASVSPDSSGPER.I                                                    |
| HsGST-MOCK_Ti_403.4931   | 5.5662 | 0.4069 | 1715.37 | 1716.03 | 8511.8  | 1     | 2870                                                               | 86.7 | 33  | R.ILSISADIETIGEILK.K                                                    |
| HsFlag1P_Ti_106.3252.325 | 4.5083 | 0.4231 | 1843.64 | 1844.2  | 7684.5  | 1     | 1191.7                                                             | 62.5 | 10  | R.ILSISADIETIGEILK.K<br>K.KIIPBLEEGLQLPSPTATSQPLPLESDAVEECLNYQHYK.<br>G |
| HsHeLa_Control-MG_Ti_20  | 6.1958 | 0.3966 | 4186.73 | 4185.68 | 10495.6 | 1     | 1614.6                                                             | 27.1 | 9   | G                                                                       |
| HsFLAG-Control_HeLa_NE   | 4.7403 | 0.2501 | 4058.44 | 4057.51 | 5222.2  | 1     | 722.3                                                              | 25.7 | 2   | K.IIPTLEEGLQLPSPTATSQPLPLESDAVEECLNYQHYK.G                              |
| HsFLAG-Control_HeLa_NE   | 3.3812 | 0.2918 | 1099.36 | 1099.11 | 6403.8  | 2     | 840                                                                | 81.2 | 4   | K.GSDFDCELR.L                                                           |
| HsFLAG-MOCK_300mM_T      | 4.0678 | 0.089  | 1520.07 | 1519.87 | 6386.5  | 1     | 1186.2                                                             | 71.4 | 1   | R.LLIHQSLAGIIGVK.G                                                      |
| HsFLAG-MOCK_300mM_T      | 3.9093 | 0.3144 | 1576.93 | 1574.82 | 8825.2  | 1     | 1003.8                                                             | 66.7 | 2   | K.IKELRENTQTTIK.L                                                       |
| HsFLAG-Control_HeLa_S10  | 3.3954 | 0.1969 | 1550.2  | 1550.6  | 8903.9  | 1     | 898.6                                                              | 63.6 | 8   | K.LFQECCPHSTDR.V                                                        |
| HsGST-MOCK_Ti_104.1551   | 4.7776 | 0.3436 | 2585.57 | 2585.86 | 8732.1  | 1     | 2149.3                                                             | 42.9 | 4   | K.LFQECCPHSTDRVVLIGGKPD.R.V                                             |
| HsGST-MOCK_Ti_105.1691   | 5.3324 | 0.3238 | 3313.39 | 3314.71 | 10946.8 | 1     | 1282.4                                                             | 29.6 | 1   | K.LFQECCPHSTDRVVLIGGKPD.R.V                                             |
| HsFLAG-Control_HeLa_NE   | 2.903  | 0.1272 | 1054.26 | 1054.28 | 4823.1  | 7     | 812.4                                                              | 77.8 | 7   | R.VVLIGGKPD.R.V                                                         |
| HsFLAG-Control_HeLa_NE   | 3.129  | 0.1936 | 1340.67 | 1341.63 | 7595.8  | 1     | 803.7                                                              | 68.2 | 2   | K.IILDISESPIK.G                                                         |
| HsHeLa3_Ti_103.3088.3091 | 3.2485 | 0.3183 | 1340.74 | 1341.63 | 5664.4  | 1     | 612.6                                                              | 68.2 | 1   | K.IILDISESPIK.G                                                         |
| HsFLAG-Control_HeLa_NE   | 4.6739 | 0.2464 | 1341.35 | 1341.63 | 8587.7  | 2     | 1790.9                                                             | 81.8 | 18  | K.IILDISESPIK.G                                                         |
| HsHeLa3_Ti_103.3098.3091 | 4.6155 | 0.253  | 1341.39 | 1341.63 | 8229.6  | 1     | 1821.8                                                             | 81.8 | 3   | K.IILDISESPIK.G                                                         |
| HsFLAG-Control_HeLa_NE   | 4.7883 | 0.2517 | 1341.5  | 1341.63 | 8184.8  | 1     | 2378                                                               | 90.9 | 7   | K.IILDISESPIK.G                                                         |
| HsFLAG-Control_HeLa_NE   | 3.4068 | 0.2917 | 1341.72 | 1341.63 | 8161.3  | 1     | 1046.2                                                             | 72.7 | 2   | K.IILDISESPIK.G                                                         |
| HsFlag1P_Ti_106.2756.275 | 4.9341 | 0.2674 | 1555.51 | 1554.87 | 6667.6  | 1     | 1614.5                                                             | 80.8 | 3   | K.IILDISESPIKGR.A                                                       |
| HsGST-MOCK_Ti_302.3971   | 3.3339 | 0.3087 | 3058.83 | 3060.25 | 5564.9  | 1     | 562.7                                                              | 41.7 | 1   | R.AQPYDPNFDYDYGGFTMMFDDR.R                                              |
| HsFLAG-Control_HeLa_NE   | 5.5832 | 0.4356 | 1918.46 | 1918.2  | 7846    | 1     | 1559.2                                                             | 63.9 | 150 | R.GSYGDLGGPIITQVITPK.D                                                  |
| HsFLAG-Control_HeLa_NE   | 1.9673 | 0.1718 | 873.4   | 874.025 | 6526.9  | 3     | 592.1                                                              | 68.8 | 1   | K.DLAGSIIGK.G                                                           |
| HsFLAG-Control_HeLa_NE   | 2.5195 | 0.0931 | 874.12  | 874.025 | 3318    | 4     | 566.2                                                              | 75   | 1   | K.DLAGSIIGK.G                                                           |
| HsFLAG-Control_HeLa_S10  | 2.272  | 0.1671 | 874.4   | 874.025 | 7075.2  | 1     | 668                                                                | 75   | 2   | K.DLAGSIIGK.G                                                           |
| HsFLAG-Control_HeLa_NE   | 4.5825 | 0.4231 | 2069.73 | 2070.18 | 6988.6  | 1     | 1409.6                                                             | 66.7 | 1   | R.HESGASIKIDEPLEGSEDR.I<br>R.HESGASIKIDEPLEGSEDR.IITITGTQDQIQNAQYLLQN   |
| HsFLAG-MOCK_300mM_T      | 4.1154 | 0.2853 | 4643.15 | 4642.09 | 8763.1  | 3     | 454.8                                                              | 17.7 | 3   | SVK.Q                                                                   |
| HsFLAG-MOCK_300mM_T      | 3.5682 | 0.2518 | 1260.91 | 1260.3  | 5151.1  | 1     | 1328.7                                                             | 90   | 10  | K.IDEPLGSEDR.I                                                          |
| HsFLAG-Control_HeLa_NE   | 5.1841 | 0.4623 | 3830.99 | 3832.21 | 9203.5  | 1     | 1030                                                               | 25   | 3   | K.IDEPLGSEDR.IITITGTQDQIQNAQYLLQNSVK.Q                                  |
| HsFLAG-Control_HeLa_NE   | 5.5052 | 0.455  | 2589.06 | 2590.94 | 8616.2  | 1     | 1540                                                               | 52.3 | 26  | R.IITITGTQDQIQNAQYLLQNSVK.Q                                             |
| HsFLAG-Control_HeLa_S10  | 4.6911 | 0.4184 | 2589.26 | 2590.94 | 11012.9 | 1     | 1112.6                                                             | 43.2 | 2   | R.IITITGTQDQIQNAQYLLQNSVK.Q                                             |
| HsFLAG-Control_HeLa_NE   | 5.9379 | 0.4364 | 2589.39 | 2590.94 | 8598.3  | 1     | 1220.1                                                             | 47.7 | 17  | R.IITITGTQDQIQNAQYLLQNSVK.Q                                             |
| HsFLAG-MOCK_300mM_T      | 5.4014 | 0.4145 | 2589.67 | 2590.94 | 9405.2  | 1     | 1228                                                               | 45.5 | 5   | R.IITITGTQDQIQNAQYLLQNSVK.Q                                             |
| Hs293FLP-MG_Ti_202.3731  | 4.969  | 0.3921 | 2589.79 | 2590.94 | 8402.9  | 1     | 1248.9                                                             | 50   | 3   | R.IITITGTQDQIQNAQYLLQNSVK.Q                                             |
| HsGST-MOCK_Ti_303.3541   | 5.2735 | 0.3229 | 2589.88 | 2590.94 | 8521.1  | 1     | 1597.1                                                             | 54.5 | 5   | R.IITITGTQDQIQNAQYLLQNSVK.Q                                             |
| HsFLAG-Control_HeLa_S10  | 5.7198 | 0.3938 | 2589.9  | 2590.94 | 8909.4  | 1     | 1626.4                                                             | 54.5 | 2   | R.IITITGTQDQIQNAQYLLQNSVK.Q                                             |
| HsFLAG-Control_HeLa_NE   | 5.576  | 0.3414 | 2589.96 | 2590.94 | 9026.4  | 1     | 1725.7                                                             | 54.5 | 8   | R.IITITGTQDQIQNAQYLLQNSVK.Q                                             |
| Hs283FLP_Ti_102.3029.301 | 5.8915 | 0.3684 | 2590    | 2590.94 | 10034.3 | 1     | 2403.9                                                             | 38.6 | 3   | R.IITITGTQDQIQNAQYLLQNSVK.Q                                             |
| HsFLAG-Control_HeLa_S10  | 5.5057 | 0.4653 | 2590.01 | 2590.94 | 11190.3 | 1     | 1848.3                                                             | 35.2 | 3   | R.IITITGTQDQIQNAQYLLQNSVK.Q                                             |
| HsFLAG-Control_HeLa_S10  | 5.6849 | 0.5239 | 2590.02 | 2590.94 | 11265.5 | 1     | 2437.3                                                             | 39.8 | 5   | R.IITITGTQDQIQNAQYLLQNSVK.Q                                             |
| HsFLAG-Control_HeLa_S10  | 3.5156 | 0.2385 | 2590.04 | 2590.94 | 8841    | 1     | 603.1                                                              | 38.6 | 2   | R.IITITGTQDQIQNAQYLLQNSVK.Q                                             |
| HsHeLa3_Ti_103.3274.3271 | 5.171  | 0.2764 | 2590.1  | 2590.94 | 8517.9  | 1     | 1125.8                                                             | 47.7 | 3   | R.IITITGTQDQIQNAQYLLQNSVK.Q                                             |

|                          |        |        |         |         |         |     |        |                                                     |    |                                 |
|--------------------------|--------|--------|---------|---------|---------|-----|--------|-----------------------------------------------------|----|---------------------------------|
| HsFLAG-Control_HeLa_NE   | 5.8708 | 0.4456 | 2590.24 | 2590.94 | 12528.2 | 1   | 2390.2 | 36.4                                                | 6  | R.IITITGTQDQIQNAQYLLQNSVK.Q     |
| HsGST-MOCK_Ti_403.364    | 4.8814 | 0.3598 | 2590.42 | 2590.94 | 12566.1 | 1   | 2070.6 | 35.2                                                | 1  | R.IITITGTQDQIQNAQYLLQNSVK.Q     |
| HsF-IP-293-MG_Ti_102.29  | 4.3221 | 0.313  | 2590.55 | 2590.94 | 9953.5  | 1   | 915.1  | 43.2                                                | 3  | R.IITITGTQDQIQNAQYLLQNSVK.Q     |
| Hs293FLP_Ti_302.3294.32  | 5.3785 | 0.3078 | 2590.57 | 2590.94 | 8567.8  | 1   | 1095.5 | 45.5                                                | 8  | R.IITITGTQDQIQNAQYLLQNSVK.Q     |
| Hs293FLP-MG_Ti_202.374   | 6.1841 | 0.4296 | 2590.6  | 2590.94 | 11582.4 | 1   | 2313.6 | 38.6                                                | 2  | R.IITITGTQDQIQNAQYLLQNSVK.Q     |
| HsFLAG-Control_HeLa_S1   | 5.9962 | 0.522  | 2590.64 | 2590.94 | 9169    | 1   | 1610.2 | 36.4                                                | 2  | R.IITITGTQDQIQNAQYLLQNSVK.Q     |
| Hs283FLP_Ti_102.3034.30  | 5.5693 | 0.309  | 2590.77 | 2590.94 | 7795.5  | 1   | 1233.6 | 50                                                  | 10 | R.IITITGTQDQIQNAQYLLQNSVK.Q     |
| HsFLAG-Control_293_Ti_2  | 4.5893 | 0.4092 | 2590.9  | 2590.94 | 11683   | 1   | 1309.9 | 30.7                                                | 1  | R.IITITGTQDQIQNAQYLLQNSVK.Q     |
| HsFLAG-Control_HeLa_NE   | 6.3998 | 0.4438 | 2591.14 | 2590.94 | 11931.7 | 1   | 2624.6 | 38.6                                                | 6  | R.IITITGTQDQIQNAQYLLQNSVK.Q     |
| HsF-IP-293-MG_Ti_102.29  | 4.9498 | 0.3334 | 2591.91 | 2590.94 | 13548.7 | 1   | 1719   | 31.8                                                | 1  | R.IITITGTQDQIQNAQYLLQNSVK.Q     |
| HsFLAG-Control_HeLa_NE   | 6.6576 | 0.4918 | 2592.01 | 2590.94 | 10530.5 | 1   | 2474.9 | 39.8                                                | 18 | R.IITITGTQDQIQNAQYLLQNSVK.Q     |
| HsHeLa3_Ti_103.3275.327  | 5.3202 | 0.4116 | 2592.12 | 2590.94 | 9207.4  | 1   | 1945.2 | 38.6                                                | 2  | R.IITITGTQDQIQNAQYLLQNSVK.Q     |
| HsFLAG-MOCK_300mM_T      | 5.7003 | 0.353  | 2593.14 | 2590.94 | 10676.5 | 1   | 1750.3 | 34.1                                                | 1  | R.IITITGTQDQIQNAQYLLQNSVK.Q     |
| gij 5729877 ref NF       | 94     | 552    | 0.567   | 646     | 70898   | 5.5 | U      | heat shock 70kDa protein 8 isoform 1 [Homo sapiens] |    |                                 |
| HsHeLa3_Ti_106.2448.244  | 4.4054 | 0.1675 | 2265.02 | 2264.51 | 7546.1  | 1   | 625.1  | 40.5                                                | 1  | K.GPAVGIDLGTTYSCVGVFQHGK.V      |
| HsHeLa_Control-MG_Ti_20  | 4.6995 | 0.211  | 2265.07 | 2264.51 | 10915.3 | 1   | 1590.6 | 54.8                                                | 4  | K.GPAVGIDLGTTYSCVGVFQHGK.V      |
| HsFLAG-Control_HeLa_S1   | 3.9247 | 0.2716 | 2265.96 | 2264.51 | 4306.6  | 1   | 618.7  | 33.3                                                | 2  | K.GPAVGIDLGTTYSCVGVFQHGK.V      |
| HsF-IP-293-MG_Ti_102.17  | 2.6315 | 0.2566 | 1487.66 | 1488.59 | 3419.2  | 1   | 176.5  | 58.3                                                | 2  | R.TTPSYVAFTDTER.L               |
| HsFLAG-Control_HeLa_NE   | 3.2444 | 0.2808 | 1487.89 | 1488.59 | 4634.5  | 1   | 570.4  | 66.7                                                | 57 | R.TTPSYVAFTDTER.L               |
| Hs293FLP-MG_Ti_202.217   | 3.2886 | 0.3043 | 1487.89 | 1488.59 | 4372.6  | 1   | 860.7  | 83.3                                                | 12 | R.TTPSYVAFTDTER.L               |
| HsHeLa_Control-MG_Ti_20  | 2.4813 | 0.2055 | 1488.47 | 1488.59 | 3249.8  | 1   | 121.1  | 50                                                  | 1  | R.TTPSYVAFTDTER.L               |
| HsHeLa_Control-MG_Ti_20  | 3.6044 | 0.4296 | 1489.1  | 1488.59 | 3675.9  | 1   | 589.8  | 75                                                  | 9  | R.TTPSYVAFTDTER.L               |
| HsFLAG-MOCK_300mM_T      | 3.2112 | 0.1491 | 2159.14 | 2157.39 | 6487.7  | 1   | 523.9  | 44.7                                                | 2  | R.TTPSYVAFTDTERLIGDAAK.N        |
| HsGST-MOCK_Ti_303.207    | 4.9627 | 0.4058 | 1650.02 | 1650.85 | 5724.7  | 1   | 1649.5 | 82.1                                                | 10 | K.NQVAMNPTNTVFDK.R              |
| HsFLAG-MOCK_300mM_T      | 3.7693 | 0.4006 | 1411.8  | 1411.57 | 5298.5  | 1   | 1194.1 | 81.8                                                | 3  | R.RFDDAVVQSDMK.H                |
| HsGST-MOCK_Ti_105.174    | 3.2636 | 0.4169 | 1654.63 | 1654.93 | 3707.1  | 1   | 650.1  | 73.1                                                | 2  | K.HWPFMVVNDAGRPK.V              |
| HsGST-MOCK_Ti_105.175    | 4.3692 | 0.3384 | 1655.25 | 1654.93 | 5147.8  | 1   | 1559.1 | 57.7                                                | 2  | K.HWPFMVVNDAGRPK.V              |
| Hs293FLP_TREX_Ti_103.1   | 3.1894 | 0.2192 | 1181.34 | 1181.33 | 4945.8  | 3   | 857.3  | 83.3                                                | 5  | K.VQVEYKGETK.S                  |
| HsGST-MOCK_Ti_302.287    | 4.164  | 0.3308 | 1617.96 | 1617.85 | 4190.6  | 1   | 927.1  | 80.8                                                | 6  | K.SFYPEEVSSMVLTK.M              |
| HsFLAG-Control_HeLa_NE   | 2.4761 | 0.1642 | 993.42  | 994.133 | 4988.2  | 5   | 428.3  | 68.8                                                | 5  | K.EIAEAYLGK.T                   |
| HsFLAG-Control_HeLa_NE   | 3.3552 | 0.2398 | 1981.96 | 1983.19 | 4191.9  | 1   | 456    | 52.9                                                | 13 | K.TVTNAVVTVPAYFNDSQR.Q          |
| HsGST-MOCK_Ti_403.272    | 3.2923 | 0.3398 | 1982.49 | 1983.19 | 4326.7  | 1   | 456.9  | 55.9                                                | 5  | K.TVTNAVVTVPAYFNDSQR.Q          |
| HsFLAG-Control_HeLa_S1   | 4.0683 | 0.3035 | 1982.58 | 1983.19 | 7541.4  | 1   | 1251.8 | 45.6                                                | 1  | K.TVTNAVVTVPAYFNDSQR.Q          |
| HsFLAG-Control_HeLa_S1   | 3.206  | 0.2753 | 1982.72 | 1983.19 | 4452.9  | 1   | 461.8  | 50                                                  | 2  | K.TVTNAVVTVPAYFNDSQR.Q          |
| HsFLAG-Control_HeLa_S1   | 3.8087 | 0.2803 | 1982.86 | 1983.19 | 7156.3  | 2   | 1073.8 | 41.2                                                | 2  | K.TVTNAVVTVPAYFNDSQR.Q          |
| HsFLAG-Control_HeLa_S1   | 3.2873 | 0.2476 | 1983.41 | 1983.19 | 4951.1  | 1   | 399.1  | 50                                                  | 4  | K.TVTNAVVTVPAYFNDSQR.Q          |
| HsFLAG-Control_HeLa_S1   | 3.9221 | 0.3572 | 1983.79 | 1983.19 | 6926.6  | 1   | 1016.7 | 42.6                                                | 1  | K.TVTNAVVTVPAYFNDSQR.Q          |
| HsHeLa_Control-MG_Ti_20  | 5.5061 | 0.3911 | 1661.88 | 1660.91 | 4282.5  | 1   | 1591.7 | 86.7                                                | 75 | R.IINEPTAAAAYGLDK.K             |
| HsFlag1P_Ti_105.2426.242 | 5.1147 | 0.1386 | 1787.95 | 1789.08 | 4898.2  | 1   | 1086.6 | 71.9                                                | 5  | R.IINEPTAAAAYGLDK.K             |
| HsHeLa_Control-MG_Ti_10  | 3.2344 | 0.2825 | 1236.5  | 1236.47 | 5739.6  | 1   | 870.4  | 72.2                                                | 4  | R.MVNHFAIEFK.R                  |
| HsFLAG-Control_HeLa_S1   | 3.5464 | 0.2955 | 2999.08 | 2999.26 | 8277.7  | 1   | 604    | 34.6                                                | 1  | R.TLSSSTQASIEIDSLYEGIDFYTSITR.A |
| HsGST-MOCK_Ti_102.194    | 4.0503 | 0.2122 | 1481.42 | 1481.65 | 6150.3  | 2   | 1322.4 | 54.5                                                | 2  | R.ARFEELNADLFR.G                |
| HsGST-MOCK_Ti_404.268    | 3.9815 | 0.2532 | 1481.49 | 1481.65 | 5240.4  | 1   | 1202.9 | 86.4                                                | 2  | R.ARFEELNADLFR.G                |
| HsHeLa_Control-MG_Ti_10  | 4.2431 | 0.2761 | 1483.66 | 1481.65 | 4363.8  | 1   | 928.3  | 81.8                                                | 24 | R.ARFEELNADLFR.G                |
| HsFLAG-Control_HeLa_S1   | 3.8164 | 0.214  | 1254.28 | 1254.39 | 7085    | 1   | 1542.2 | 88.9                                                | 7  | R.FEELNADLFR.G                  |
| HsFLAG-Control_293_Ti_2  | 3.8559 | 0.4528 | 1481.52 | 1482.68 | 5943.4  | 1   | 846.1  | 65.4                                                | 2  | K.SQIHDIVLVGGSTR.I              |
| HsFLAG-Control_MG_293_   | 3.1916 | 0.398  | 1481.61 | 1482.68 | 6462.3  | 1   | 617    | 53.8                                                | 1  | K.SQIHDIVLVGGSTR.I              |
| Hs293FLP-MG_Ti_204.184   | 3.3162 | 0.4067 | 1481.69 | 1482.68 | 6234.7  | 1   | 644.6  | 57.7                                                | 2  | K.SQIHDIVLVGGSTR.I              |
| HsFLAG-Control_HeLa_NE   | 3.7225 | 0.4672 | 1481.73 | 1482.68 | 6211.4  | 1   | 888    | 65.4                                                | 4  | K.SQIHDIVLVGGSTR.I              |

|                          |        |        |         |         |         |   |        |      |    |                                    |
|--------------------------|--------|--------|---------|---------|---------|---|--------|------|----|------------------------------------|
| Hs293FLP_Ti_304.1698.16  | 3.2524 | 0.4446 | 1481.82 | 1482.68 | 5265.7  | 1 | 766.2  | 65.4 | 2  | K.SQIHDIVLVGGSTR.I                 |
| HsFLAG-MOCK_300mM_T      | 3.041  | 0.3696 | 1481.86 | 1482.68 | 4795.5  | 1 | 703.9  | 65.4 | 1  | K.SQIHDIVLVGGSTR.I                 |
| HsHeLa_Control-MG_Ti_10  | 3.3098 | 0.3886 | 1481.89 | 1482.68 | 5062.8  | 1 | 824.4  | 69.2 | 2  | K.SQIHDIVLVGGSTR.I                 |
| HsHeLa_Control-MG_Ti_20  | 4.946  | 0.3344 | 1481.93 | 1482.68 | 7702.9  | 1 | 2340.2 | 84.6 | 11 | K.SQIHDIVLVGGSTR.I                 |
| HsFLAG-Control_HeLa_NE   | 4.5597 | 0.3068 | 1482.26 | 1482.68 | 8854.8  | 1 | 1742   | 69.2 | 9  | K.SQIHDIVLVGGSTR.I                 |
| HsFLAG-Control_HeLa_S1   | 4.7635 | 0.3224 | 1482.41 | 1482.68 | 8130.9  | 1 | 1893.2 | 73.1 | 18 | K.SQIHDIVLVGGSTR.I                 |
| Hs293FLP-MG_Ti_204.184   | 4.6886 | 0.312  | 1482.5  | 1482.68 | 8678.4  | 1 | 2057.2 | 76.9 | 1  | K.SQIHDIVLVGGSTR.I                 |
| HsFLAG-Control_293_Ti_2  | 4.2856 | 0.3071 | 1482.56 | 1482.68 | 8116.9  | 1 | 1808.6 | 73.1 | 2  | K.SQIHDIVLVGGSTR.I                 |
| HsGST-MOCK_Ti_405.205    | 2.287  | 0.322  | 1482.57 | 1482.68 | 3388.1  | 1 | 321.2  | 57.7 | 1  | K.SQIHDIVLVGGSTR.I                 |
| HsFLAG-Control_HeLa_S1   | 3.4799 | 0.3599 | 1482.7  | 1482.68 | 7228.3  | 4 | 606    | 53.8 | 3  | K.SQIHDIVLVGGSTR.I                 |
| HsHeLa3_Ti_105.1744.174  | 4.2829 | 0.4085 | 1482.73 | 1482.68 | 5309.1  | 1 | 1023.6 | 73.1 | 2  | K.SQIHDIVLVGGSTR.I                 |
| HsFLAG-Control_HeLa_NE   | 4.593  | 0.3103 | 1482.76 | 1482.68 | 8234.6  | 1 | 2366.9 | 80.8 | 5  | K.SQIHDIVLVGGSTR.I                 |
| HsFLAG-MOCK_300mM_T      | 4.0466 | 0.2571 | 1482.83 | 1482.68 | 7009.9  | 1 | 1435.8 | 69.2 | 3  | K.SQIHDIVLVGGSTR.I                 |
| HsGST-MOCK_Ti_101.080    | 4.6702 | 0.295  | 1482.99 | 1482.68 | 7872.8  | 1 | 2390.2 | 80.8 | 6  | K.SQIHDIVLVGGSTR.I                 |
| HsFLAG-Control_HeLa_S1   | 3.9658 | 0.3945 | 1483.02 | 1482.68 | 7100.2  | 1 | 1215.4 | 69.2 | 1  | K.SQIHDIVLVGGSTR.I                 |
| HsGST-MOCK_Ti_405.205    | 5.092  | 0.3507 | 1483.61 | 1482.68 | 8554.1  | 1 | 2381.3 | 80.8 | 2  | K.SQIHDIVLVGGSTR.I                 |
| Hs293FLP_Ti_305.1686.16  | 4.6099 | 0.2866 | 1483.98 | 1482.68 | 7164.7  | 1 | 2599.1 | 88.5 | 4  | K.SQIHDIVLVGGSTR.I                 |
| HsFLAG-Control_HeLa_S1   | 4.4395 | 0.2709 | 1485.01 | 1482.68 | 9405.6  | 1 | 1871.4 | 69.2 | 3  | K.SQIHDIVLVGGSTR.I                 |
| HsFLAG-Control_MG_293_   | 3.1449 | 0.1938 | 1082.22 | 1082.24 | 5278.9  | 5 | 835.3  | 87.5 | 7  | K.LLQDFFNGK.E                      |
| HsFLAG-MOCK_300mM_T      | 3.5405 | 0.2578 | 1568.26 | 1566.8  | 8502.8  | 1 | 1323.3 | 75   | 1  | K.LLQDFFNGKELNK.S                  |
| HsFLAG-Control_HeLa_S1   | 5.6097 | 0.5339 | 2260.52 | 2261.49 | 7975    | 1 | 1606.5 | 56.8 | 7  | K.SINPDEAVAYGAAVQAAILSGDK.S        |
| HsFLAG-Control_HeLa_NE   | 5.9557 | 0.404  | 2260.63 | 2261.49 | 8563.7  | 1 | 1874.8 | 39.8 | 5  | K.SINPDEAVAYGAAVQAAILSGDK.S        |
| Hs293FLP-MG_Ti_202.417   | 5.1297 | 0.5251 | 2260.66 | 2261.49 | 7167    | 1 | 1540.4 | 59.1 | 4  | K.SINPDEAVAYGAAVQAAILSGDK.S        |
| HsGST-MOCK_Ti_302.392    | 5.314  | 0.5256 | 2260.67 | 2261.49 | 7971.5  | 1 | 1811   | 63.6 | 5  | K.SINPDEAVAYGAAVQAAILSGDK.S        |
| HsFLAG-Control_HeLa_S1   | 5.818  | 0.3302 | 2260.73 | 2261.49 | 8332.9  | 1 | 1455.8 | 37.5 | 6  | K.SINPDEAVAYGAAVQAAILSGDK.S        |
| HsFLAG-Control_HeLa_S1   | 5.8344 | 0.5087 | 2260.74 | 2261.49 | 7587.2  | 1 | 1617.1 | 59.1 | 24 | K.SINPDEAVAYGAAVQAAILSGDK.S        |
| HsFLAG-Control_HeLa_S1   | 5.4821 | 0.4976 | 2260.84 | 2261.49 | 7522    | 1 | 2005.7 | 61.4 | 10 | K.SINPDEAVAYGAAVQAAILSGDK.S        |
| Hs293FLP_Ti_302.3692.36  | 4.5818 | 0.435  | 2260.97 | 2261.49 | 7687.7  | 1 | 1220.3 | 36.4 | 1  | K.SINPDEAVAYGAAVQAAILSGDK.S        |
| HsHeLa_Control_Ti_102.36 | 4.6448 | 0.4625 | 2261.06 | 2261.49 | 6095.4  | 1 | 1146.3 | 54.5 | 1  | K.SINPDEAVAYGAAVQAAILSGDK.S        |
| Hs293FLP-MG_Ti_202.419   | 5.2834 | 0.4054 | 2261.06 | 2261.49 | 8657.2  | 1 | 1434.6 | 36.4 | 1  | K.SINPDEAVAYGAAVQAAILSGDK.S        |
| HsFLAG-Control_HeLa_S1   | 6.5692 | 0.5503 | 2261.2  | 2261.49 | 9040.4  | 1 | 2484.3 | 44.3 | 5  | K.SINPDEAVAYGAAVQAAILSGDK.S        |
| HsGST-MOCK_Ti_302.393    | 6.0016 | 0.4796 | 2261.29 | 2261.49 | 8073.8  | 1 | 1980.4 | 40.9 | 1  | K.SINPDEAVAYGAAVQAAILSGDK.S        |
| HsHeLa_Control-MG_Ti_20  | 5.8931 | 0.4265 | 2261.32 | 2261.49 | 8329.3  | 1 | 1959.5 | 40.9 | 2  | K.SINPDEAVAYGAAVQAAILSGDK.S        |
| HsFLAG-Control_293_Ti_2  | 5.4368 | 0.5221 | 2261.5  | 2261.49 | 7200.9  | 1 | 1253.6 | 54.5 | 12 | K.SINPDEAVAYGAAVQAAILSGDK.S        |
| HsF-IP-293-MG_Ti_102.33  | 5.2435 | 0.407  | 2261.56 | 2261.49 | 8035.6  | 1 | 1825.5 | 39.8 | 2  | K.SINPDEAVAYGAAVQAAILSGDK.S        |
| HsFLAG-Control_HeLa_NE   | 6.0796 | 0.4577 | 2261.56 | 2261.49 | 9546.8  | 1 | 2193.2 | 42   | 2  | K.SINPDEAVAYGAAVQAAILSGDK.S        |
| HsFLAG-Control_HeLa_S1   | 6.0208 | 0.4435 | 2261.57 | 2261.49 | 10483.8 | 1 | 2409.7 | 39.8 | 2  | K.SINPDEAVAYGAAVQAAILSGDK.S        |
| Hs283FLP_Ti_102.3377.33  | 5.611  | 0.4086 | 2261.58 | 2261.49 | 8393.8  | 1 | 1711.1 | 37.5 | 2  | K.SINPDEAVAYGAAVQAAILSGDK.S        |
| HsFLAG-Control_HeLa_NE   | 6.2814 | 0.4759 | 2261.82 | 2261.49 | 6695.3  | 1 | 1432.4 | 59.1 | 17 | K.SINPDEAVAYGAAVQAAILSGDK.S        |
| Hs283FLP_Ti_103.3082.30  | 6.1923 | 0.5078 | 2261.93 | 2261.49 | 6939.7  | 1 | 1751.5 | 61.4 | 11 | K.SINPDEAVAYGAAVQAAILSGDK.S        |
| HsHeLa3_Ti_102.3815.381  | 4.9635 | 0.4367 | 2262.11 | 2261.49 | 7595.2  | 1 | 1422.2 | 37.5 | 2  | K.SINPDEAVAYGAAVQAAILSGDK.S        |
| Hs293FLP_Ti_302.3683.36  | 4.8028 | 0.425  | 2262.33 | 2261.49 | 5824.5  | 1 | 1116.1 | 56.8 | 1  | K.SINPDEAVAYGAAVQAAILSGDK.S        |
| HsHeLa_Control-MG_Ti_20  | 6.5278 | 0.5401 | 2262.51 | 2261.49 | 7263.9  | 1 | 1852.4 | 63.6 | 4  | K.SINPDEAVAYGAAVQAAILSGDK.S        |
| HsFLAG-Control_HeLa_NE   | 6.0978 | 0.5559 | 2262.55 | 2261.49 | 7942.2  | 1 | 2036.6 | 63.6 | 18 | K.SINPDEAVAYGAAVQAAILSGDK.S        |
| HsHeLa3_Ti_102.3785.378  | 3.555  | 0.3286 | 2263.04 | 2261.49 | 7709.2  | 1 | 714.7  | 45.5 | 2  | K.SINPDEAVAYGAAVQAAILSGDK.S        |
| HsHeLa_Control_Ti_102.36 | 5.71   | 0.4624 | 2263.38 | 2261.49 | 7211.4  | 1 | 1448   | 36.4 | 2  | K.SINPDEAVAYGAAVQAAILSGDK.S        |
| HsHeLa_Control-MG_Ti_20  | 4.5969 | 0.3942 | 3239.63 | 3240.82 | 11123.7 | 1 | 1384.5 | 27.5 | 2  | K.SENVQDLLLDVTPLSLGIETAGGVMVTLIK.R |
| HsFLAG-Control_HeLa_S1   | 3.9516 | 0.3796 | 2775.78 | 2775.99 | 5840.8  | 1 | 436.6  | 37   | 5  | K.QTQTFTTYSNQPGLIQVYEGER.A         |
| HsFLAG-Control_HeLa_NE   | 4.4446 | 0.2549 | 2775.86 | 2775.99 | 11162.9 | 1 | 1419.2 | 32.6 | 3  | K.QTQTFTTYSNQPGLIQVYEGER.A         |



|                   |                          |        |        |         |         |         |     |        |      |                                                                 |
|-------------------|--------------------------|--------|--------|---------|---------|---------|-----|--------|------|-----------------------------------------------------------------|
|                   | HsFLAG-Control_HeLa_NE   | 3.4583 | 0.3349 | 2775.88 | 2775.99 | 6152.6  | 1   | 471.2  | 37   | 2 K.QTQFTTYSNQPGLVLIQVYEGER.A                                   |
| *                 | HsFLAG-Control_HeLa_S10  | 3.215  | 0.0989 | 990.19  | 990.101 | 5523.5  | 3   | 856.7  | 92.9 | 4 R.LSKEDIER.M                                                  |
| *                 | HsFLAG-MOCK_300mM_T      | 3.8038 | 0.3146 | 1700.94 | 1698.89 | 5486    | 1   | 904.1  | 73.1 | 2 R.MVQEAKEYKADEK.Q                                             |
| *                 | HsHeLa3_Ti_103.2103.210  | 2.8767 | 0.3146 | 1303.5  | 1304.46 | 4220.9  | 1   | 263.2  | 60   | 1 K.NSLESYAFNMK.A                                               |
| *                 | HsGST-MOCK_Ti_403.248    | 3.8512 | 0.3573 | 1304.08 | 1304.46 | 6601.5  | 1   | 1373.6 | 85   | 4 K.NSLESYAFNMK.A                                               |
| *                 | HsHeLa3_Ti_103.2100.210  | 3.4534 | 0.2336 | 1304.51 | 1304.46 | 6123.1  | 1   | 1194.7 | 85   | 2 K.NSLESYAFNMK.A                                               |
| *                 | HsFLAG-Control_MG_293    | 2.4955 | 0.1493 | 1306.36 | 1304.46 | 4600    | 1   | 348.3  | 65   | 1 K.NSLESYAFNMK.A                                               |
| *                 | HsFLAG-Control_HeLa_NE   | 3.6803 | 0.2102 | 1305.94 | 1305.44 | 7123.7  | 2   | 1324.7 | 88.9 | 2 K.CNEIINWLDK.N                                                |
| *                 | HsFLAG-Control_HeLa_NE   | 5.0042 | 0.2718 | 1746.62 | 1746.83 | 10402.5 | 1   | 1560.6 | 65.4 | 10 K.NQTAEKEEFEHQKQ.E                                           |
| *                 | HsFLAG-MOCK_300mM_T      | 5.469  | 0.1038 | 2246.04 | 2246.4  | 8090.7  | 1   | 856.7  | 52.9 | 1 K.NQTAEKEEFEHQKQ.E                                            |
| gi 4503481 ref NF |                          | 29     | 144    | 0.563   | 437     | 50119   | 6.7 | U      |      | eukaryotic translation elongation factor 1 gamma [Homo sapiens] |
| *                 | HsGST-MOCK_Ti_404.196    | 4.9436 | 0.4465 | 1348.36 | 1348.55 | 9413.5  | 1   | 2236.6 | 79.2 | 32 K.ALIAAQYSGAQVR.V                                            |
|                   | HsGST-MOCK_Ti_106.217    | 3.3089 | 0.4209 | 1707.81 | 1708.92 | 5891.1  | 1   | 836.9  | 64.3 | 1 R.VLSAPPHFHFGQTNR.T                                           |
|                   | HsGST-MOCK_Ti_302.453    | 4.4819 | 0.4146 | 3198.69 | 3200.41 | 8401.2  | 1   | 994.2  | 40.7 | 9 K.VPAFEGDDGFCVFESNAIAYYSNEELR.G                               |
|                   | HsGST-MOCK_Ti_303.465    | 5.6216 | 0.4227 | 3199.39 | 3200.41 | 8508.2  | 1   | 1425.5 | 32.4 | 3 K.VPAFEGDDGFCVFESNAIAYYSNEELR.G                               |
|                   | HsGST-MOCK_Ti_103.240    | 3.3541 | 0.1422 | 1275.5  | 1275.58 | 5082.5  | 1   | 1165.5 | 85   | 5 R.RILGLLDAYLK.T                                               |
|                   | HsGST-MOCK_Ti_303.354    | 3.6319 | 0.0894 | 1119.22 | 1119.39 | 3738.1  | 3   | 868.4  | 88.9 | 2 R.ILGLLDAYLK.T                                                |
|                   | HsGST-MOCK_Ti_406.294    | 4.2496 | 0.3348 | 1610.4  | 1610.82 | 6506.5  | 1   | 1724.5 | 86.4 | 4 R.WFLTCINQPQFR.A                                              |
|                   | HsGST-MOCK_Ti_302.221    | 5.0408 | 0.4796 | 2357.34 | 2358.5  | 5515.7  | 1   | 984.6  | 59.5 | 6 K.AAAPAPEEEMDECEQALAAEPK.A                                    |
|                   | HsGST-MOCK_Ti_406.243    | 3.0281 | 0.0941 | 924.91  | 925.075 | 3427.9  | 6   | 632.1  | 92.9 | 1 K.DPFAHLPK.S                                                  |
|                   | Hs293FLP_TREX_Ti_102.2   | 2.185  | 0.1825 | 1085.38 | 1086.23 | 8062.3  | 2   | 610.5  | 68.8 | 1 K.STFVLDEFK.R                                                 |
|                   | HsGST-MOCK_Ti_302.232    | 2.7873 | 0.1742 | 1085.48 | 1086.23 | 5117.3  | 1   | 887.9  | 81.2 | 2 K.STFVLDEFK.R                                                 |
|                   | HsGST-MOCK_Ti_302.245    | 2.7543 | 0.1806 | 1085.49 | 1086.23 | 6792.6  | 1   | 675.9  | 75   | 1 K.STFVLDEFK.R                                                 |
|                   | HsGST-MOCK_Ti_402.265    | 2.8527 | 0.235  | 1086.18 | 1086.23 | 5825.1  | 4   | 894.9  | 81.2 | 2 K.STFVLDEFK.R                                                 |
|                   | Hs293FLP_TREX_Ti_102.2   | 2.7033 | 0.1174 | 1086.33 | 1086.23 | 5619.7  | 2   | 745.4  | 81.2 | 1 K.STFVLDEFK.R                                                 |
|                   | HsGST-MOCK_Ti_402.264    | 2.2858 | 0.1961 | 1086.52 | 1086.23 | 7087.3  | 8   | 457.6  | 62.5 | 1 K.STFVLDEFK.R                                                 |
|                   | HsGST-MOCK_Ti_303.233    | 2.636  | 0.1936 | 1242.21 | 1242.42 | 6208.1  | 3   | 826.9  | 72.2 | 1 K.STFVLDEFKR.K                                                |
|                   | HsGST-MOCK_Ti_305.386    | 4.9402 | 0.4168 | 2589.93 | 2590.85 | 6842.3  | 1   | 803.9  | 50   | 2 R.KYSNEDTLVALPYFWEHFDK.D                                      |
|                   | HsGST-MOCK_Ti_404.425    | 4.3908 | 0.4458 | 2460.38 | 2462.68 | 4712.3  | 1   | 902.6  | 57.9 | 10 K.YSNEDTLVALPYFWEHFDK.D                                      |
|                   | HsGST-MOCK_Ti_404.424    | 4.0327 | 0.2749 | 2462.15 | 2462.68 | 7335.1  | 1   | 1139.7 | 39.5 | 3 K.YSNEDTLVALPYFWEHFDK.D                                       |
|                   | HsGST-MOCK_Ti_303.411    | 4.7388 | 0.2994 | 2462.51 | 2462.68 | 7279.1  | 1   | 1411   | 43.4 | 1 K.YSNEDTLVALPYFWEHFDK.D                                       |
|                   | HsGST-MOCK_Ti_304.349    | 4.3676 | 0.3903 | 2463.73 | 2462.68 | 5110.5  | 1   | 581.4  | 44.7 | 11 K.YSNEDTLVALPYFWEHFDK.D                                      |
|                   | HsGST-MOCK_Ti_302.305    | 4.1212 | 0.3956 | 1462.22 | 1462.56 | 7513.3  | 1   | 1411.1 | 80   | 6 K.DGWSLWYSEYR.F                                               |
|                   | HsGST-MOCK_Ti_302.306    | 2.5435 | 0.1757 | 1462.58 | 1462.56 | 2757.8  | 1   | 219.8  | 60   | 1 K.DGWSLWYSEYR.F                                               |
|                   | HsGST-MOCK_Ti_102.457    | 3.7247 | 0.3748 | 3993.05 | 3995.44 | 12032   | 1   | 1518.1 | 29   | 1 K.DGWSLWYSEYR.FPEELTQTFMCSNLITGMFQR.L                         |
|                   | HsGST-MOCK_Ti_303.468    | 5.8493 | 0.4677 | 2552.37 | 2551.9  | 9621.9  | 1   | 1355.5 | 52.5 | 8 R.FPEELTQTFMCSNLITGMFQR.L                                     |
|                   | HsFLAG-Control_HeLa_S10  | 3.8355 | 0.3598 | 2575.52 | 2574.9  | 10533.5 | 1   | 717.5  | 39.1 | 1 K.NAFASVILFGTNNSSSISGVVWFR.G                                  |
|                   | HsGST-MOCK_Ti_302.398    | 4.9525 | 0.4169 | 2688.65 | 2688.91 | 7410.9  | 1   | 1184   | 54.8 | 18 R.GQELAFPLSPDWQVDYESYTW.R.K                                  |
| *                 | HsGST-MOCK_Ti_404.182    | 3.9437 | 0.3331 | 1573.59 | 1573.74 | 3508.2  | 1   | 971.3  | 88.5 | 3 R.KLDPGSEETQTLVR.E                                            |
|                   | HsGST-MOCK_Ti_404.299    | 4.0081 | 0.3533 | 1685.94 | 1685.84 | 9076.2  | 1   | 1278.6 | 65.4 | 7 R.EYFSWEGAFQHV.GK.A                                           |
| gi 4502891 ref NF |                          | 21     | 124    | 0.561   | 237     | 26215   | 4.1 | U      |      | chloride channel, nucleotide-sensitive, 1A [Homo sapiens]       |
| *                 | HsFlag1P_Ti_103.2305.230 | 4.4    | 0.4289 | 1338.37 | 1338.5  | 8016.3  | 1   | 1291.8 | 75   | 32 K.GLGTGLYIAESR.L                                             |
| *                 | Hs293FLP-MG_Ti_205.410   | 2.9104 | 0.3358 | 2719.84 | 2721.09 | 6556.6  | 1   | 319.8  | 29.2 | 2 R.LSWLDGSGGLGFSLEYPTISLHALSR.D                                |
| *                 | HsFLAG-Control_Hela_Ti_1 | 3.5721 | 0.4091 | 2720.45 | 2721.09 | 6642.6  | 1   | 548.5  | 35.4 | 1 R.LSWLDGSGGLGFSLEYPTISLHALSR.D                                |
| *                 | HsHeLa_Control-MG_Ti_20  | 5.7977 | 0.4083 | 2720.66 | 2721.09 | 7004.4  | 1   | 1496.7 | 37.5 | 7 R.LSWLDGSGGLGFSLEYPTISLHALSR.D                                |
| *                 | HsFLAG-Control_293_Ti_10 | 5.4751 | 0.3674 | 2720.93 | 2721.09 | 7389.6  | 1   | 1519.5 | 37.5 | 2 R.LSWLDGSGGLGFSLEYPTISLHALSR.D                                |
| *                 | Hs293FLP-MG_Ti_206.350   | 5.9236 | 0.4348 | 2720.95 | 2721.09 | 7612.8  | 1   | 1861.9 | 40.6 | 6 R.LSWLDGSGGLGFSLEYPTISLHALSR.D                                |
| *                 | HsHeLa_Control-MG_Ti_10  | 3.0996 | 0.4355 | 2721.17 | 2721.09 | 5886.9  | 1   | 500.9  | 37.5 | 1 R.LSWLDGSGGLGFSLEYPTISLHALSR.D                                |
| *                 | HsHeLa_Control-MG_Ti_20  | 4.6738 | 0.3949 | 2721.18 | 2721.09 | 8353.9  | 1   | 848.9  | 41.7 | 4 R.LSWLDGSGGLGFSLEYPTISLHALSR.D                                |

|                   |                          |        |        |         |         |        |      |        |      |    |                                                       |
|-------------------|--------------------------|--------|--------|---------|---------|--------|------|--------|------|----|-------------------------------------------------------|
| *                 | Hs293FLP_Ti_306.3455.34: | 3.8376 | 0.4276 | 2721.45 | 2721.09 | 5782.7 | 1    | 562.6  | 41.7 | 4  | R.LSWLDGSGGLGFSLEYPTISLHALSR.D                        |
| *                 | HsHeLa_Control_Ti_106.38 | 4.9922 | 0.4319 | 2721.5  | 2721.09 | 7131.4 | 1    | 1216.5 | 33.3 | 2  | R.LSWLDGSGGLGFSLEYPTISLHALSR.D                        |
| *                 | HsFLAG-Control_293_Ti_1( | 4.0698 | 0.3901 | 2721.64 | 2721.09 | 6741.9 | 1    | 654.1  | 39.6 | 3  | R.LSWLDGSGGLGFSLEYPTISLHALSR.D                        |
| *                 | HsHeLa_Control-MG_Ti_10  | 5.3233 | 0.3708 | 2721.75 | 2721.09 | 5393.1 | 1    | 1365.8 | 39.6 | 5  | R.LSWLDGSGGLGFSLEYPTISLHALSR.D                        |
| *                 | HsHeLa_Control_Ti_106.38 | 2.5935 | 0.4215 | 2721.86 | 2721.09 | 5891.1 | 1    | 331.6  | 33.3 | 1  | R.LSWLDGSGGLGFSLEYPTISLHALSR.D                        |
| *                 | Hs293FLP_Ti_306.3459.34: | 5.8601 | 0.4302 | 2722.27 | 2721.09 | 6257.5 | 1    | 1366.6 | 38.5 | 4  | R.LSWLDGSGGLGFSLEYPTISLHALSR.D                        |
| *                 | HsFLAG-MOCK_300mM_T      | 4.2541 | 0.372  | 2723.59 | 2721.09 | 5543.9 | 1    | 543.3  | 28.1 | 2  | R.LSWLDGSGGLGFSLEYPTISLHALSR.D                        |
| *                 | HsHeLa_Control-MG_Ti_10  | 3.7758 | 0.4268 | 2009.47 | 2008.22 | 9276.3 | 1    | 1283.9 | 62.5 | 2  | R.DRSDCLGEHLYVMVNAK.F                                 |
| *                 | Hs293FLP_Ti_304.2151.21: | 2.9273 | 0.276  | 1738.89 | 1736.95 | 6880.4 | 1    | 887.3  | 57.1 | 2  | R.SDCLGEHLYVMVNAK.F                                   |
| *                 | Hs283FLP_Ti_104.1825.18: | 6.3189 | 0.479  | 3315.79 | 3316.33 | 7291.3 | 1    | 1750.9 | 36.1 | 9  | K.FEESKEPVADEEEEDSDDDVEPITEFR.F                       |
| *                 | HsFLAG-Control_293_Ti_2( | 5.6155 | 0.4936 | 2057.41 | 2058.33 | 6835   | 1    | 1171.8 | 61.1 | 9  | R.LEGMLSQSVSSQYNMAGVR.T                               |
| *                 | Hs293FLP_Ti_303.2391.23: | 5.8136 | 0.3528 | 3458.98 | 3459.54 | 5067.5 | 1    | 951.5  | 32.5 | 15 | R.TEDSIRDYEDGMEVDTTPTVAGQFEDADVDH.-                   |
| *                 | Hs293FLP-MG_Ti_202.279:  | 4.5214 | 0.441  | 2756.59 | 2757.81 | 5441.1 | 1    | 619.9  | 43.8 | 11 | R.DYEDGMEVDTTPTVAGQFEDADVDH.-                         |
| gij10800130 ref N |                          | 6      | 41     | 0.546   | 130     | 14107  | 10.9 | U      |      |    | histone 1, H2ad [Homo sapiens]                        |
| gij4504243 ref Nf |                          | 6      | 41     | 0.546   | 130     | 14091  | 10.9 | U      |      |    | H2A histone family, member I [Homo sapiens]           |
| gij4504241 ref Nf |                          | 6      | 41     | 0.546   | 130     | 14091  | 10.9 | U      |      |    | H2A histone family, member D [Homo sapiens]           |
| gij4504239 ref Nf |                          | 6      | 41     | 0.546   | 130     | 14091  | 10.9 | U      |      |    | H2A histone family, member C [Homo sapiens]           |
| gij29553970 ref N |                          | 6      | 41     | 0.55    | 129     | 14019  | 10.9 | U      |      |    | H2A histone family, member J isoform 2 [Homo sapiens] |
| gij18105045 ref N |                          | 6      | 41     | 0.555   | 128     | 13906  | 10.9 | U      |      |    | H2A histone family member [Homo sapiens]              |
| gij10800144 ref N |                          | 6      | 41     | 0.555   | 128     | 13936  | 10.9 | U      |      |    | H2A histone family, member E [Homo sapiens]           |
| gij10800132 ref N |                          | 6      | 41     | 0.546   | 130     | 14091  | 10.9 | U      |      |    | H2A histone family, member P [Homo sapiens]           |
|                   | Hs293FLP-MG_Ti_104.190:  | 2.3447 | 0.1182 | 944.77  | 945.109 | 4092.1 | 5    | 353.2  | 68.8 | 1  | R.AGLQFPVGR.V                                         |
|                   | HsHeLa_Control-MG_Ti_10  | 2.6626 | 0.17   | 945.58  | 945.109 | 3921   | 2    | 699.4  | 81.2 | 1  | R.AGLQFPVGR.V                                         |
|                   | HsFLAG-Control_HeLa_NE   | 4.5014 | 0.4747 | 2916.07 | 2917.38 | 7823.6 | 1    | 640.8  | 32.1 | 1  | R.VGAGAPVYLAHVLEYLTAEILELAGNAAR.D                     |
|                   | HsFLAG-Control_HeLa_NE   | 6.3703 | 0.4516 | 2916.71 | 2917.38 | 9322.9 | 1    | 2302   | 36.6 | 3  | R.VGAGAPVYLAHVLEYLTAEILELAGNAAR.D                     |
|                   | HsHeLa_Control-MG_Ti_10  | 3.6354 | 0.3585 | 1693.91 | 1693.9  | 7274.3 | 1    | 861.3  | 65.4 | 1  | R.HLQLAIRNDEELNK.L                                    |
|                   | HsFLAG-Control_HeLa_NE   | 4.9834 | 0.3335 | 1934.26 | 1932.36 | 4934.3 | 1    | 762.8  | 58.3 | 34 | K.VTIAQGGVLPNIQAVLLPK.K                               |
| gij29558022 ref N |                          | 21     | 122    | 0.545   | 387     | 42771  | 5.2  | U      |      |    | protein phosphatase 1B isoform 2 [Homo sapiens]       |
|                   | HsFLAG-Control_293_Ti_2( | 2.6531 | 0.2112 | 1103.33 | 1104.17 | 4101.4 | 1    | 403.1  | 75   | 1  | K.HNAHGAGNGLR.Y                                       |
|                   | HsFLAG-Control_293_Ti_1( | 3.2339 | 0.3453 | 1103.74 | 1104.17 | 8861.2 | 1    | 2265.7 | 95   | 2  | K.HNAHGAGNGLR.Y                                       |
|                   | HsHeLa_Control-MG_Ti_10  | 4.8821 | 0.4005 | 2423.08 | 2421.6  | 8031.9 | 1    | 1254.5 | 52.6 | 6  | R.VANYCSTHLEHITTNEDFR.A                               |
|                   | HsFLAG-Control_MG_293_   | 2.9992 | 0.2103 | 1332.24 | 1333.48 | 7647.4 | 1    | 699    | 62.5 | 6  | K.SGSALELSVENVK.N                                     |
|                   | HsFLAG-Control_293_Ti_2( | 2.9318 | 0.2077 | 1332.57 | 1333.48 | 8414.3 | 2    | 667.2  | 54.2 | 4  | K.SGSALELSVENVK.N                                     |
|                   | HsFLAG-Control_MG_293_   | 4.1643 | 0.3777 | 1333.09 | 1333.48 | 7152.2 | 1    | 1787   | 83.3 | 6  | K.SGSALELSVENVK.N                                     |
|                   | HsFLAG-Control_293_Ti_2( | 4.9454 | 0.3704 | 1333.37 | 1333.48 | 6398.8 | 1    | 1435.5 | 79.2 | 6  | K.SGSALELSVENVK.N                                     |
|                   | HsFLAG-Control_293_Ti_2( | 2.4622 | 0.2138 | 1233.46 | 1234.45 | 8679   | 8    | 612.3  | 54.2 | 1  | R.SGSTAVGVMISPK.H                                     |
|                   | HsHeLa_Control-MG_Ti_20  | 3.7095 | 0.2212 | 1382.45 | 1382.49 | 4556.8 | 1    | 868.1  | 85   | 12 | K.HIYFINCDSR.A                                        |
|                   | HsFLAG-Control_293_Ti_2( | 3.3738 | 0.2339 | 2045.79 | 2046.14 | 6794.8 | 1    | 703    | 56.2 | 4  | R.NGQVCFSTQDHPKPCNPR.E                                |
|                   | HsFLAG-Control_MG_293_   | 2.5652 | 0.0862 | 1273.47 | 1274.48 | 5630   | 1    | 401.2  | 63.6 | 1  | R.IQNAGGSVMIQR.V                                      |
|                   | HsFLAG-Control_MG_293_   | 4.4413 | 0.3358 | 1273.86 | 1274.48 | 6627.4 | 1    | 1508.5 | 86.4 | 2  | R.IQNAGGSVMIQR.V                                      |
|                   | HsFLAG-Control_293_Ti_2( | 4.4046 | 0.2904 | 1275.28 | 1274.48 | 7129.4 | 1    | 1529.5 | 81.8 | 2  | R.IQNAGGSVMIQR.V                                      |
|                   | HsFLAG-Control_MG_293_   | 2.8295 | 0.1074 | 903.19  | 903.026 | 4555.8 | 1    | 951.5  | 93.8 | 2  | R.VNGSLAVSR.A                                         |
|                   | HsFLAG-Control_MG_293_   | 2.3432 | 0.1222 | 944.4   | 945.017 | 7578   | 5    | 674.3  | 71.4 | 4  | R.ALGDYDYK.C                                          |
|                   | HsFLAG-Control_293_Ti_2( | 3.7284 | 0.3198 | 2056.4  | 2057.31 | 5430.9 | 1    | 555.4  | 50   | 9  | K.GPTEQLVSPEPEVYEILR.A                                |
|                   | HsHeLa_Control-MG_Ti_20  | 4.4558 | 0.2567 | 2788.68 | 2789.99 | 9630.6 | 1    | 1342   | 36.4 | 1  | K.SRLEVSDDLNVCNWWVDTCLHK.G                            |
|                   | HsFLAG-Control_293_Ti_2( | 3.6227 | 0.3259 | 1528.53 | 1529.73 | 4073.7 | 1    | 564.8  | 65.4 | 5  | K.SGEEGMPDLAHVMR.I                                    |
|                   | HsFLAG-Control_293_Ti_2( | 4.1389 | 0.2668 | 1820.08 | 1819.11 | 4487.6 | 1    | 494.2  | 50   | 19 | R.ILSAENIPNLPPGGGLAGK.R                               |
|                   | HsFLAG-Control_MG_293_   | 3.8182 | 0.2893 | 1207.2  | 1207.38 | 6196.9 | 1    | 990.8  | 83.3 | 28 | K.RNVIEAVYSR.L                                        |
| *                 | HsFLAG-Control_293_Ti_2( | 2.637  | 0.1658 | 1348.18 | 1348.32 | 3746.8 | 2    | 321.7  | 58.3 | 1  | R.ESDGGAGDLEDPW.-                                     |

|                          |        |        |         |         |        |       |                                                                 |
|--------------------------|--------|--------|---------|---------|--------|-------|-----------------------------------------------------------------|
| gi 14389309 ref N        | 41     | 800    | 0.543   | 449     | 49895  | 5.1 U | tubulin alpha 6 [Homo sapiens]                                  |
| HsFLAG-Control_HeLa_S1(  | 5.6931 | 0.4653 | 2009.21 | 2009.09 | 9324.1 | 1     | 1749.3 63.2 204 K.TIGGGDDSFNTFFSETGAGK.H                        |
| HsF-IP-293-MG_Ti_102.27  | 5.0334 | 0.4399 | 1702.32 | 1702.95 | 4530   | 1     | 1284.8 82.1 22 R.AVFVDLEPTVIDEVR.T                              |
| HsFLAG-Control_HeLa_S1(  | 4.9427 | 0.335  | 1702.54 | 1702.95 | 7851   | 1     | 1529.4 50 5 R.AVFVDLEPTVIDEVR.T                                 |
| HsFLAG-Control_HeLa_S1(  | 4.0389 | 0.2932 | 1703.03 | 1702.95 | 8687.1 | 1     | 1386.4 46.4 2 R.AVFVDLEPTVIDEVR.T                               |
| HsHeLa-FLAG-IP_S100_Ti_  | 5.2915 | 0.4169 | 1703.58 | 1702.95 | 4669.1 | 1     | 1294.9 82.1 56 R.AVFVDLEPTVIDEVR.T                              |
| HsFLAG-Control_HeLa_S1(  | 4.7409 | 0.3371 | 1703.91 | 1702.95 | 5321.1 | 1     | 1259.1 78.6 16 R.AVFVDLEPTVIDEVR.T                              |
| HsFLAG-Control_HeLa_NE   | 4.1691 | 0.3052 | 1704.24 | 1702.95 | 8886.6 | 1     | 1330.2 44.6 1 R.AVFVDLEPTVIDEVR.T                               |
| HsHeLa_Control_Ti_102.30 | 5.091  | 0.2766 | 1704.76 | 1702.95 | 4122.7 | 1     | 1098.9 82.1 19 R.AVFVDLEPTVIDEVR.T                              |
| HsFLAG-Control_HeLa_S1(  | 4.2449 | 0.3005 | 2415.72 | 2416.66 | 8163.2 | 1     | 1212.2 36.2 4 R.QLFHPEQLITGKEDAANNYAR.G                         |
| HsHeLa_Control-MG_Ti_10  | 3.4137 | 0.2652 | 2416.42 | 2416.66 | 7726.4 | 1     | 627.9 45 8 R.QLFHPEQLITGKEDAANNYAR.G                            |
| HsGST-MOCK_Ti_103.173    | 4.1081 | 0.2897 | 2416.8  | 2416.66 | 6806.6 | 1     | 1048.6 36.2 1 R.QLFHPEQLITGKEDAANNYAR.G                         |
| HsFLAG-Control_HeLa_NE   | 3.5321 | 0.3633 | 2417.37 | 2416.66 | 8286.1 | 1     | 502 42.5 3 R.QLFHPEQLITGKEDAANNYAR.G                            |
| HsFLAG-Control_HeLa_S1(  | 3.3565 | 0.0828 | 1086.26 | 1086.27 | 6338.4 | 2     | 941.8 87.5 18 K.EIIDLVLDRI                                      |
| Hs293FLP-MG_Ti_206.350   | 4.9972 | 0.3758 | 3392.79 | 3392.78 | 9865.2 | 1     | 1364.1 27.4 5 K.LADQCTGLQGFLVFHSGGGTSGSFTSLLMER.L               |
| HsFLAG-Control_MG_293_   | 3.4903 | 0.1725 | 1719.53 | 1719.9  | 7713.5 | 1     | 803 61.5 17 R.NLDIERPTYTNLNR.L                                  |
| HsFLAG-Control_HeLa_S1(  | 4.6066 | 0.4074 | 1488.47 | 1488.77 | 7506.5 | 1     | 1467.1 76.9 9 R.LISQIVSSITASLR.F                                |
| HsFLAG-Control_HeLa_S1(  | 4.684  | 0.43   | 1488.49 | 1488.77 | 7157.4 | 1     | 1312.2 73.1 22 R.LISQIVSSITASLR.F                               |
| HsHeLa_Control-MG_Ti_20  | 5.0495 | 0.4454 | 1488.53 | 1488.77 | 8030.6 | 1     | 1907.4 80.8 39 R.LISQIVSSITASLR.F                               |
| HsFLAG-Control_HeLa_S1(  | 4.722  | 0.3946 | 1488.57 | 1488.77 | 8151.1 | 1     | 1172.8 69.2 9 R.LISQIVSSITASLR.F                                |
| HsFLAG-Control_HeLa_S1(  | 4.3035 | 0.346  | 1488.75 | 1488.77 | 5615.6 | 1     | 1324.7 55.8 2 R.LISQIVSSITASLR.F                                |
| HsFLAG-Control_HeLa_S1(  | 4.1471 | 0.2471 | 1489.29 | 1488.77 | 5256.5 | 3     | 867.3 50 2 R.LISQIVSSITASLR.F                                   |
| HsFLAG-Control_HeLa_NE   | 4.6049 | 0.3537 | 1489.3  | 1488.77 | 6361.1 | 1     | 1211.5 73.1 15 R.LISQIVSSITASLR.F                               |
| HsFLAG-Control_HeLa_NE   | 4.3453 | 0.2295 | 1489.54 | 1488.77 | 5799.3 | 1     | 1231.8 53.8 2 R.LISQIVSSITASLR.F                                |
| HsFLAG-Control_HeLa_S1(  | 3.7596 | 0.3173 | 1490.02 | 1488.77 | 5380.1 | 1     | 894.9 50 1 R.LISQIVSSITASLR.F                                   |
| HsFLAG-Control_HeLa_NE   | 5.8208 | 0.383  | 2410.89 | 2410.69 | 6224.2 | 1     | 1491.8 62.5 149 R.FDGALNVDLTEFQTNLVPYPR.I                       |
| Hs293FLP-MG_Ti_103.214   | 3.0177 | 0.1953 | 1251.47 | 1250.43 | 4064.5 | 1     | 618.2 81.2 2 K.YMACCLLYR.G                                      |
| HsFLAG-Control_HeLa_S1(  | 2.3439 | 0.2742 | 1015.45 | 1016.18 | 7798   | 1     | 652.7 72.2 2 K.DVNAAIATIK.T                                     |
| HsFLAG-Control_293_Ti_2( | 2.4919 | 0.2722 | 1015.46 | 1016.18 | 6406.7 | 1     | 644.8 77.8 4 K.DVNAAIATIK.T                                     |
| HsFLAG-Control_HeLa_S1(  | 2.1932 | 0.1673 | 1015.48 | 1016.18 | 6826.5 | 6     | 502 66.7 1 K.DVNAAIATIK.T                                       |
| HsHeLa_Control_Ti_102.17 | 2.4787 | 0.2338 | 1015.71 | 1016.18 | 5846.2 | 1     | 557.5 77.8 3 K.DVNAAIATIK.T                                     |
| HsFLAG-Control_HeLa_S1(  | 3.6128 | 0.2873 | 1016.27 | 1016.18 | 5362.6 | 1     | 1163.9 88.9 1 K.DVNAAIATIK.T                                    |
| HsFLAG-Control_HeLa_S1(  | 3.5311 | 0.2771 | 1016.35 | 1016.18 | 5480.7 | 1     | 1193.4 88.9 2 K.DVNAAIATIK.T                                    |
| HsFLAG-Control_HeLa_S1(  | 3.5176 | 0.2784 | 1016.38 | 1016.18 | 5208.6 | 1     | 1029 83.3 1 K.DVNAAIATIK.T                                      |
| HsHeLa-FLAG-IP_S100_Ti_  | 3.4285 | 0.2973 | 1016.56 | 1016.18 | 5657.7 | 1     | 925.2 77.8 12 K.DVNAAIATIK.T                                    |
| HsFLAG-Control_HeLa_S1(  | 2.1618 | 0.2038 | 1017.63 | 1016.18 | 6803   | 6     | 446.1 66.7 2 K.DVNAAIATIK.T                                     |
| HsHeLa_Control-MG_Ti_20  | 3.7919 | 0.422  | 1755.69 | 1755.98 | 6153.4 | 1     | 806.5 65.4 7 K.RTIQFVDWCPTGFK.V                                 |
| HsFLAG-Control_HeLa_S1(  | 4.5938 | 0.4395 | 1599.28 | 1599.79 | 7004.1 | 1     | 1203.6 75 4 R.TIQFVDWCPTGFK.V                                   |
| HsHeLa-FLAG-IP_S100_Ti_  | 4.1491 | 0.409  | 1825.53 | 1826.1  | 3764.8 | 1     | 755.9 64.7 121 K.VGINYPPTVPPGGDLAK.V                            |
| HsGST-MOCK_Ti_404.302    | 2.6983 | 0.1597 | 2332.29 | 2331.52 | 9294.4 | 1     | 579.2 42.1 1 R.AFVHWYVGEEMEEGFSEAR.E                            |
| HsFLAG-Control_HeLa_S1(  | 2.1109 | 0.2465 | 906.43  | 907.026 | 5999.8 | 4     | 545.2 78.6 1 R.EDMAALEK.D                                       |
| HsFLAG-Control_HeLa_S1(  | 4.5554 | 0.3766 | 2080.1  | 2079.95 | 6250.7 | 1     | 885 58.3 5 K.DYEEVGADSADGEDEGEEY.-                              |
| gi 14165464 ref N        | 59     | 263    | 0.542   | 550     | 59037  | 9.2 U | polypyrimidine tract-binding protein 1 isoform b [Homo sapiens] |
| gi 4506243 ref NF        | 59     | 263    | 0.535   | 557     | 59633  | 9.2 U | polypyrimidine tract-binding protein 1 isoform a [Homo sapiens] |
| gi 14165466 ref N        | 59     | 263    | 0.561   | 531     | 57221  | 9.2 U | polypyrimidine tract-binding protein 1 isoform c [Homo sapiens] |
| HsGST-MOCK_Ti_102.198    | 6.3264 | 0.3753 | 3451.63 | 3451.67 | 8131.1 | 1     | 1391.4 29.7 4 K.RGSDLEFSTCVTNGPFMSSNSASAANGNDSKK.F              |
| HsFLAG-Control_HeLa_NE   | 6.0654 | 0.5142 | 2112.79 | 2113.5  | 9098.1 | 1     | 3133 73.7 11 R.KLPIDVTEGEVISLGLPFGK.V                           |
| HsHeLa3_Ti_106.2910.291  | 5.716  | 0.478  | 2113.22 | 2113.5  | 7768.8 | 1     | 2103.1 65.8 4 R.KLPIDVTEGEVISLGLPFGK.V                          |
| HsFLAG-Control_HeLa_S1(  | 3.8182 | 0.1819 | 2113.52 | 2113.5  | 6081.1 | 1     | 825.3 35.5 1 R.KLPIDVTEGEVISLGLPFGK.V                           |

|                          |        |        |         |         |        |   |        |      |                                       |
|--------------------------|--------|--------|---------|---------|--------|---|--------|------|---------------------------------------|
| HsGST-MOCK_Ti_406.315    | 5.6388 | 0.5109 | 2113.8  | 2113.5  | 9176.1 | 1 | 2272.7 | 68.4 | 6 R.KLPIDVTEGEVISLGLPFGK.V            |
| HsFLAG-Control_HeLa_S10  | 4.9072 | 0.499  | 2114.57 | 2113.5  | 8297.8 | 1 | 1896.8 | 63.2 | 2 R.KLPIDVTEGEVISLGLPFGK.V            |
| HsHeLa3_Ti_105.3559.355  | 3.5469 | 0.1599 | 2115.25 | 2113.5  | 5872.6 | 1 | 733.9  | 34.2 | 1 R.KLPIDVTEGEVISLGLPFGK.V            |
| HsFLAG-Control_HeLa_NE   | 4.3717 | 0.3222 | 2115.48 | 2113.5  | 6576.7 | 1 | 1205.2 | 39.5 | 3 R.KLPIDVTEGEVISLGLPFGK.V            |
| HsFLAG-Control_HeLa_S10  | 5.7831 | 0.4791 | 1984.52 | 1985.33 | 10120  | 1 | 2833   | 72.2 | 32 K.LPIDVTEGEVISLGLPFGK.V            |
| HsFLAG-Control_HeLa_NE   | 3.0179 | 0.1332 | 1431.53 | 1432.62 | 5054.4 | 1 | 428.8  | 63.6 | 1 R.GQPIYQFSNHK.E                     |
| HsFLAG-Control_HeLa_NE   | 2.8591 | 0.0956 | 1431.57 | 1432.62 | 4754.1 | 1 | 426.2  | 63.6 | 1 R.GQPIYQFSNHK.E                     |
| HsGST-MOCK_Ti_406.253    | 3.1579 | 0.1749 | 1433.39 | 1432.62 | 4082.8 | 1 | 664.7  | 81.8 | 8 R.GQPIYQFSNHK.E                     |
| HsFLAG-Control_HeLa_NE   | 2.8596 | 0.2369 | 1433.83 | 1432.62 | 4876.8 | 1 | 673.5  | 72.7 | 3 R.GQPIYQFSNHK.E                     |
|                          |        |        |         |         |        |   |        |      | R.AQAALQAVNSVQSGNLALAASAAAVDAGMAMAGQS |
| HsGST-MOCK_Ti_404.488    | 5.1903 | 0.4524 | 3681.44 | 3683.19 | 6521.7 | 1 | 1101.5 | 26.3 | 7 PVLR.I                              |
| HsFLAG-Control_HeLa_NE   | 3.7235 | 0.3185 | 2488.6  | 2489.96 | 4847.8 | 1 | 327.9  | 37.5 | 5 R.IIVENLFYPVTLVDLHQIFSK.F           |
| HsFLAG-Control_HeLa_S10  | 3.9292 | 0.2219 | 2489.61 | 2489.96 | 4623.4 | 2 | 543.6  | 33.8 | 3 R.IIVENLFYPVTLVDLHQIFSK.F           |
| HsFLAG-Control_HeLa_S10  | 3.6305 | 0.3224 | 2490.21 | 2489.96 | 4379.8 | 1 | 380.9  | 42.5 | 2 R.IIVENLFYPVTLVDLHQIFSK.F           |
| HsFLAG-Control_HeLa_NE   | 4.3244 | 0.2846 | 2492.06 | 2489.96 | 4588.2 | 4 | 569.9  | 33.8 | 3 R.IIVENLFYPVTLVDLHQIFSK.F           |
| HsFLAG-Control_HeLa_NE   | 5.2787 | 0.3686 | 2243.72 | 2244.47 | 7263.1 | 1 | 1646.5 | 65.8 | 6 K.NNQFQALLQYADPVSAQHAK.L            |
| HsGST-MOCK_Ti_405.320    | 5.3317 | 0.4129 | 2243.73 | 2244.47 | 6065.1 | 1 | 1178.6 | 40.8 | 2 K.NNQFQALLQYADPVSAQHAK.L            |
| HsHeLa3_Ti_105.2894.289  | 4.6285 | 0.3915 | 2243.97 | 2244.47 | 6987.9 | 1 | 1158.7 | 57.9 | 2 K.NNQFQALLQYADPVSAQHAK.L            |
| HsFLAG-Control_HeLa_NE   | 4.9335 | 0.3289 | 2244.37 | 2244.47 | 7038.3 | 1 | 1177.2 | 39.5 | 6 K.NNQFQALLQYADPVSAQHAK.L            |
| HsFLAG-Control_HeLa_S10  | 3.6924 | 0.3342 | 2244.58 | 2244.47 | 8883.4 | 1 | 666.3  | 42.1 | 1 K.NNQFQALLQYADPVSAQHAK.L            |
| HsFLAG-Control_HeLa_S10  | 4.8845 | 0.2504 | 2244.61 | 2244.47 | 5886.4 | 2 | 860.1  | 38.2 | 3 K.NNQFQALLQYADPVSAQHAK.L            |
| HsFLAG-MOCK_300mM_T      | 4.4406 | 0.4435 | 2244.7  | 2244.47 | 5611.7 | 1 | 603.7  | 47.4 | 2 K.NNQFQALLQYADPVSAQHAK.L            |
| HsHeLa3_Ti_105.2895.289  | 4.6961 | 0.3277 | 2245.08 | 2244.47 | 7007.4 | 2 | 1014.5 | 39.5 | 2 K.NNQFQALLQYADPVSAQHAK.L            |
| HsGST-MOCK_Ti_405.321    | 4.684  | 0.3838 | 2245.21 | 2244.47 | 7069.5 | 1 | 964.5  | 52.6 | 2 K.NNQFQALLQYADPVSAQHAK.L            |
| HsFLAG-Control_HeLa_NE   | 3.8309 | 0.2629 | 2245.46 | 2244.47 | 7225.5 | 2 | 892.6  | 50   | 2 K.NNQFQALLQYADPVSAQHAK.L            |
| HsFLAG-MOCK_300mM_T      | 4.6577 | 0.318  | 2245.62 | 2244.47 | 6222.9 | 1 | 990.4  | 39.5 | 3 K.NNQFQALLQYADPVSAQHAK.L            |
| HsFLAG-Control_HeLa_NE   | 4.5737 | 0.2838 | 2247.14 | 2244.47 | 8476.6 | 1 | 1355.7 | 38.2 | 1 K.NNQFQALLQYADPVSAQHAK.L            |
| HsFLAG-Control_HeLa_NE   | 4.1714 | 0.222  | 1898.62 | 1899.04 | 6235   | 1 | 976.3  | 63.3 | 11 K.LSLDQNNIYNACCTLR.I               |
| HsFLAG-Control_HeLa_S10  | 4.2616 | 0.5106 | 2274.79 | 2276.64 | 5345.8 | 1 | 673.7  | 50   | 1 R.IAIPGLAGAGNSVLLVSNLNPER.V         |
| HsFLAG-Control_HeLa_NE   | 5.4401 | 0.478  | 2274.96 | 2276.64 | 5037   | 1 | 1131.8 | 61.4 | 8 R.IAIPGLAGAGNSVLLVSNLNPER.V         |
| HsFLAG-Control_HeLa_S10  | 5.7041 | 0.4789 | 2274.98 | 2276.64 | 5199.2 | 1 | 1263.9 | 63.6 | 5 R.IAIPGLAGAGNSVLLVSNLNPER.V         |
| HsFLAG-Control_HeLa_S10  | 4.3313 | 0.2651 | 2275.77 | 2276.64 | 7096.1 | 1 | 845.9  | 31.8 | 3 R.IAIPGLAGAGNSVLLVSNLNPER.V         |
| HsHeLa3_Ti_106.2844.284  | 4.27   | 0.3251 | 2276.09 | 2276.64 | 5081.2 | 1 | 663.6  | 52.3 | 3 R.IAIPGLAGAGNSVLLVSNLNPER.V         |
| HsFLAG-Control_HeLa_S10  | 4.842  | 0.3544 | 2276.23 | 2276.64 | 7322.2 | 1 | 980.9  | 34.1 | 2 R.IAIPGLAGAGNSVLLVSNLNPER.V         |
| HsFLAG-Control_293_Ti_20 | 5.1713 | 0.4578 | 2276.35 | 2276.64 | 5078.5 | 1 | 1058   | 61.4 | 6 R.IAIPGLAGAGNSVLLVSNLNPER.V         |
| HsFLAG-Control_HeLa_NE   | 5.4593 | 0.3685 | 2276.4  | 2276.64 | 8307.3 | 1 | 1800   | 40.9 | 6 R.IAIPGLAGAGNSVLLVSNLNPER.V         |
| HsHeLa3_Ti_105.3450.345  | 4.4179 | 0.3191 | 2276.54 | 2276.64 | 8470.3 | 1 | 1907   | 38.6 | 1 R.IAIPGLAGAGNSVLLVSNLNPER.V         |
| HsFLAG-Control_HeLa_NE   | 4.9192 | 0.2565 | 2276.79 | 2276.64 | 7287.8 | 1 | 1538.5 | 40.9 | 4 R.IAIPGLAGAGNSVLLVSNLNPER.V         |
| HsFLAG-Control_HeLa_NE   | 5.7103 | 0.4983 | 2279.21 | 2276.64 | 5363.6 | 1 | 1326.9 | 65.9 | 9 R.IAIPGLAGAGNSVLLVSNLNPER.V         |
| HsFLAG-Control_HeLa_NE   | 5.8826 | 0.4616 | 2039.65 | 2040.37 | 9127.6 | 1 | 3092.6 | 52.9 | 12 R.VTPQSLFILFGVYGDVQR.V             |
| HsGST-MOCK_Ti_406.336    | 5.5157 | 0.4752 | 2039.89 | 2040.37 | 9871   | 1 | 2122.8 | 64.7 | 11 R.VTPQSLFILFGVYGDVQR.V             |
| HsHeLa3_Ti_105.4199.419  | 4.5749 | 0.3467 | 2041.14 | 2040.37 | 7456.8 | 1 | 1520.9 | 44.1 | 1 R.VTPQSLFILFGVYGDVQR.V              |
| HsFLAG-Control_HeLa_NE   | 5.777  | 0.4778 | 2041.2  | 2040.37 | 9824.9 | 1 | 2275.2 | 67.6 | 11 R.VTPQSLFILFGVYGDVQR.V             |
| HsHeLa3_Ti_106.2370.237  | 2.9403 | 0.2629 | 2578.94 | 2578.88 | 8241.9 | 1 | 432.9  | 34.8 | 1 K.ENALVQMADGNQAQLAMSHLNHGK.L        |
| HsFLAG-MOCK_300mM_T      | 2.0774 | 0.1678 | 820.84  | 821.013 | 3876.8 | 3 | 258.6  | 75   | 4 K.LHGKPIR.I                         |
| HsFLAG-Control_HeLa_NE   | 1.9682 | 0.1179 | 991.56  | 992.126 | 6035.7 | 2 | 381    | 71.4 | 1 K.HQNVQLPR.E                        |
| HsFLAG-Control_HeLa_NE   | 1.9574 | 0.1291 | 991.58  | 992.126 | 6499.7 | 9 | 464.4  | 71.4 | 2 K.HQNVQLPR.E                        |
| HsFLAG-Control_HeLa_NE   | 2.7513 | 0.1339 | 992.25  | 992.126 | 5238   | 1 | 881.1  | 85.7 | 2 K.HQNVQLPR.E                        |
| HsFLAG-Control_HeLa_NE   | 2.816  | 0.1346 | 992.43  | 992.126 | 6125   | 1 | 884    | 85.7 | 7 K.HQNVQLPR.E                        |

|                    |                          |        |        |         |         |        |   |                                          |      |     |                                 |
|--------------------|--------------------------|--------|--------|---------|---------|--------|---|------------------------------------------|------|-----|---------------------------------|
|                    | HsHeLa3_Ti_106.1892.189: | 2.564  | 0.1768 | 992.74  | 992.126 | 5198.9 | 1 | 1066.3                                   | 92.9 | 1   | K.HQNVQLPR.E                    |
|                    | HsFLAG-MOCK_300mM_T      | 3.7069 | 0.3227 | 2078.2  | 2078.25 | 6710.2 | 1 | 752.8                                    | 55.9 | 3   | K.HQNVQLPREGQEDQGLTK.D          |
|                    | HsFLAG-Control_HeLa_NE   | 3.0439 | 0.3205 | 1059.33 | 1059.13 | 6276.8 | 2 | 614.7                                    | 75   | 10  | K.DYGNSPLHR.F                   |
|                    | HsFLAG-Control_HeLa_NE   | 2.6686 | 0.187  | 2995.46 | 2996.35 | 5965.1 | 1 | 301.5                                    | 30.8 | 1   | K.NFQNIFFPSATLHLSNIPPSVSEEDLK.V |
|                    | HsFLAG-MOCK_300mM_T      | 4.6391 | 0.154  | 2999.01 | 2996.35 | 3961.1 | 1 | 556.4                                    | 33.7 | 4   | K.NFQNIFFPSATLHLSNIPPSVSEEDLK.V |
|                    | HsFLAG-Control_HeLa_NE   | 3.281  | 0.176  | 1107.3  | 1107.3  | 3933.9 | 2 | 722                                      | 80   | 3   | K.VLFSSNGGVVK.G                 |
|                    | HsFLAG-Control_HeLa_NE   | 2.0293 | 0.2147 | 1107.67 | 1107.3  | 7132.6 | 6 | 444.1                                    | 60   | 1   | K.VLFSSNGGVVK.G                 |
| gij 17921989 ref N | 33                       | 503    | 0.538  | 448     | 49924   | 5.1    | U | tubulin, alpha 1 [Homo sapiens]          |      |     |                                 |
| *                  | HsFLAG-Control_HeLa_S1(  | 4.7739 | 0.4576 | 2070.76 | 2069.16 | 8343.4 | 1 | 1206.4                                   | 55.3 | 3   | K.TIGGGDDSFRTFFCETGAGK.H        |
| *                  | HsFLAG-Control_HeLa_S1(  | 2.7348 | 0.0824 | 1717.1  | 1716.97 | 5027.2 | 1 | 1172.5                                   | 71.4 | 1   | R.AVFVDLEPTVIDEIR.N             |
|                    | HsFLAG-Control_HeLa_S1(  | 4.2449 | 0.3005 | 2415.72 | 2416.66 | 8163.2 | 1 | 1212.2                                   | 36.2 | 4   | R.QLFHPEQLITGKEDAANNYAR.G       |
|                    | HsHeLa_Control-MG_Ti_10  | 3.4137 | 0.2652 | 2416.42 | 2416.66 | 7726.4 | 1 | 627.9                                    | 45   | 8   | R.QLFHPEQLITGKEDAANNYAR.G       |
|                    | HsGST-MOCK_Ti_103.173    | 4.1081 | 0.2897 | 2416.8  | 2416.66 | 6806.6 | 1 | 1048.6                                   | 36.2 | 1   | R.QLFHPEQLITGKEDAANNYAR.G       |
|                    | HsFLAG-Control_HeLa_NE   | 3.5321 | 0.3633 | 2417.37 | 2416.66 | 8286.1 | 1 | 502                                      | 42.5 | 3   | R.QLFHPEQLITGKEDAANNYAR.G       |
|                    | HsFLAG-Control_MG_293_   | 3.4903 | 0.1725 | 1719.53 | 1719.9  | 7713.5 | 1 | 803                                      | 61.5 | 17  | R.NLDIERPTYTNLNR.L              |
|                    | HsFLAG-Control_HeLa_S1(  | 4.6066 | 0.4074 | 1488.47 | 1488.77 | 7506.5 | 1 | 1467.1                                   | 76.9 | 9   | R.LISQIVSSITASLR.F              |
|                    | HsFLAG-Control_HeLa_S1(  | 4.684  | 0.43   | 1488.49 | 1488.77 | 7157.4 | 1 | 1312.2                                   | 73.1 | 22  | R.LISQIVSSITASLR.F              |
|                    | HsHeLa_Control-MG_Ti_20  | 5.0495 | 0.4454 | 1488.53 | 1488.77 | 8030.6 | 1 | 1907.4                                   | 80.8 | 39  | R.LISQIVSSITASLR.F              |
|                    | HsFLAG-Control_HeLa_S1(  | 4.722  | 0.3946 | 1488.57 | 1488.77 | 8151.1 | 1 | 1172.8                                   | 69.2 | 9   | R.LISQIVSSITASLR.F              |
|                    | HsFLAG-Control_HeLa_S1(  | 4.3035 | 0.346  | 1488.75 | 1488.77 | 5615.6 | 1 | 1324.7                                   | 55.8 | 2   | R.LISQIVSSITASLR.F              |
|                    | HsFLAG-Control_HeLa_S1(  | 4.1471 | 0.2471 | 1489.29 | 1488.77 | 5256.5 | 3 | 867.3                                    | 50   | 2   | R.LISQIVSSITASLR.F              |
|                    | HsFLAG-Control_HeLa_NE   | 4.6049 | 0.3537 | 1489.3  | 1488.77 | 6361.1 | 1 | 1211.5                                   | 73.1 | 15  | R.LISQIVSSITASLR.F              |
|                    | HsFLAG-Control_HeLa_NE   | 4.3453 | 0.2295 | 1489.54 | 1488.77 | 5799.3 | 1 | 1231.8                                   | 53.8 | 2   | R.LISQIVSSITASLR.F              |
|                    | HsFLAG-Control_HeLa_S1(  | 3.7596 | 0.3173 | 1490.02 | 1488.77 | 5380.1 | 1 | 894.9                                    | 50   | 1   | R.LISQIVSSITASLR.F              |
|                    | HsFLAG-Control_HeLa_NE   | 5.8208 | 0.383  | 2410.89 | 2410.69 | 6224.2 | 1 | 1491.8                                   | 62.5 | 149 | R.FDGALNVDLTFEQTNLVPYPR.I       |
|                    | HsFLAG-Control_HeLa_S1(  | 3.7053 | 0.2052 | 1757.29 | 1758.07 | 4837.7 | 5 | 804.3                                    | 45   | 1   | R.IHFPLATYAPVISAEEK.A           |
|                    | HsFLAG-Control_HeLa_NE   | 4.2732 | 0.3578 | 1757.6  | 1758.07 | 4681.9 | 1 | 893.2                                    | 70   | 13  | R.IHFPLATYAPVISAEEK.A           |
|                    | HsHeLa_Control-MG_Ti_20  | 4.3621 | 0.4339 | 1757.74 | 1758.07 | 4584.4 | 1 | 1152                                     | 76.7 | 16  | R.IHFPLATYAPVISAEEK.A           |
|                    | HsFLAG-Control_HeLa_S1(  | 4.2526 | 0.2613 | 1757.75 | 1758.07 | 5170.2 | 2 | 1162.9                                   | 48.3 | 1   | R.IHFPLATYAPVISAEEK.A           |
|                    | HsFLAG-Control_HeLa_S1(  | 4.411  | 0.4766 | 1758.41 | 1758.07 | 4071.6 | 1 | 935.5                                    | 73.3 | 3   | R.IHFPLATYAPVISAEEK.A           |
|                    | HsHeLa_Control-MG_Ti_10  | 4.4041 | 0.3426 | 2753.23 | 2752.04 | 7001.1 | 1 | 1357.7                                   | 52.2 | 2   | K.AYHEQLSVAEITNACFEPANQMVK.C    |
|                    | Hs293FLP-MG_Ti_103.214   | 3.0177 | 0.1953 | 1251.47 | 1250.43 | 4064.5 | 1 | 618.2                                    | 81.2 | 2   | K.YMACCLLYR.G                   |
| *                  | HsFLAG-Control_HeLa_S1(  | 2.5016 | 0.0892 | 985.51  | 986.156 | 6822.2 | 1 | 746.2                                    | 72.2 | 2   | K.DVNAIAAIK.T                   |
|                    | HsFLAG-Control_HeLa_S1(  | 4.2609 | 0.3792 | 1742.64 | 1741.95 | 6595.1 | 1 | 848.5                                    | 61.5 | 13  | K.RSIQFVDWCPTGFK.V              |
|                    | HsHeLa_Control-MG_Ti_10  | 2.0279 | 0.2794 | 1584.51 | 1585.77 | 5859.1 | 2 | 301.2                                    | 41.7 | 1   | R.SIQFVDWCPTGFK.V               |
|                    | HsFLAG-Control_HeLa_S1(  | 4.2773 | 0.4207 | 1585.41 | 1585.77 | 5673   | 1 | 1071.3                                   | 75   | 19  | R.SIQFVDWCPTGFK.V               |
|                    | HsHeLa_Control-MG_Ti_10  | 4.2534 | 0.4251 | 1587.43 | 1585.77 | 4819.9 | 1 | 915.9                                    | 75   | 18  | R.SIQFVDWCPTGFK.V               |
|                    | HsHeLa-FLAG-IP_S100_Ti_  | 4.1491 | 0.409  | 1825.53 | 1826.1  | 3764.8 | 1 | 755.9                                    | 64.7 | 121 | K.VGINYQPPTVPPGGDLAK.V          |
|                    | HsF-IP-293-MG_Ti_104.26  | 2.8488 | 0.3461 | 1865.28 | 1866.11 | 9656.2 | 1 | 1217.8                                   | 59.4 | 2   | R.AVCMLSNTTAAIEAWAR.L           |
|                    | HsGST-MOCK_Ti_404.302    | 2.6983 | 0.1597 | 2332.29 | 2331.52 | 9294.4 | 1 | 579.2                                    | 42.1 | 1   | R.AFVHWYVGEEMEEGFSEAR.E         |
|                    | HsFLAG-Control_HeLa_S1(  | 2.1109 | 0.2465 | 906.43  | 907.026 | 5999.8 | 4 | 545.2                                    | 78.6 | 1   | R.EDMAALEK.D                    |
| gij 32189392 ref N | 12                       | 37     | 0.535  | 198     | 21892   | 6      | U | peroxiredoxin 2 isoform a [Homo sapiens] |      |     |                                 |
|                    | Hs293FLP_Ti_305.1314.13  | 2.3118 | 0.3187 | 972.84  | 973.16  | 4399.8 | 1 | 585.8                                    | 75   | 3   | R.IGKPAPDFK.A                   |
|                    | Hs293FLP-MG_Ti_202.185   | 2.1917 | 0.2778 | 978.39  | 979.121 | 6657.5 | 6 | 421.1                                    | 61.1 | 3   | K.ATAVVDGAFK.E                  |
| *                  | HsHeLa_Control-MG_Ti_20  | 3.692  | 0.1258 | 2700.69 | 2701.02 | 6058.4 | 1 | 780.9                                    | 31.5 | 1   | K.LGCEVLGVSVDSQFTHLAWINTPR.K    |
|                    | Hs293FLP-MG_Ti_205.349   | 3.5756 | 0.3792 | 1863.67 | 1864.2  | 7361.9 | 1 | 1443.1                                   | 64.7 | 2   | R.KEGGLGPLNIPLLDVTR.R           |
|                    | HsHeLa_Control-MG_Ti_20  | 3.7201 | 0.2082 | 1864.11 | 1864.2  | 6037.1 | 9 | 895.9                                    | 39.7 | 2   | R.KEGGLGPLNIPLLDVTR.R           |
|                    | Hs293FLP-MG_Ti_205.347   | 4.6343 | 0.3016 | 1864.42 | 1864.2  | 5787.4 | 6 | 783.7                                    | 41.2 | 2   | R.KEGGLGPLNIPLLDVTR.R           |
|                    | HsHeLa_Control-MG_Ti_20  | 5.2909 | 0.4716 | 1864.53 | 1864.2  | 7147   | 1 | 1690.4                                   | 70.6 | 4   | R.KEGGLGPLNIPLLDVTR.R           |

|                    |                          |        |        |         |         |         |      |        |                                                           |     |                                        |
|--------------------|--------------------------|--------|--------|---------|---------|---------|------|--------|-----------------------------------------------------------|-----|----------------------------------------|
|                    | Hs293FLP_Ti_305.3187.31  | 4.5309 | 0.4623 | 1864.74 | 1864.2  | 4444    | 1    | 1316.5 | 73.5                                                      | 3   | R.KEGGLGPLNIPLLADVTR.R                 |
|                    | Hs293FLP_Ti_305.3189.31  | 3.691  | 0.2002 | 1864.84 | 1864.2  | 5349.6  | 1    | 1193.3 | 45.6                                                      | 1   | R.KEGGLGPLNIPLLADVTR.R                 |
|                    | HsGST-MOCK_Ti_404.421    | 4.5025 | 0.3843 | 1735.53 | 1736.02 | 5533.7  | 1    | 845.3  | 65.6                                                      | 4   | K.EGGLGPLNIPLLADVTR.R                  |
|                    | Hs293FLP_TREX_Ti_102.1   | 3.0279 | 0.27   | 1212.5  | 1212.39 | 5952.5  | 1    | 1083.6 | 90                                                        | 8   | R.QITVNDLPVGR.S                        |
|                    | Hs293FLP-MG_Ti_204.219   | 4.5058 | 0.2759 | 3790.83 | 3791.09 | 10898.8 | 1    | 1109.9 | 25                                                        | 4   | R.LVQAFQYTDEHGEVCPAGWKPGSDTIKPNVDDSK.E |
| gi 5031753 ref NF  |                          | 30     | 337    | 0.526   | 449     | 49229   | 6.3  | U      | heterogeneous nuclear ribonucleoprotein H1 [Homo sapiens] |     |                                        |
| *                  | HsHeLa3_Ti_103.1858.185  | 3.6518 | 0.3853 | 1505.66 | 1505.59 | 2651.7  | 1    | 462.4  | 79.2                                                      | 6   | R.GLPWSCSADEVQR.F                      |
| *                  | HsFLAG-Control_HeLa_NE   | 4.1456 | 0.1218 | 2108.07 | 2108.22 | 8088.5  | 1    | 1528.7 | 40.3                                                      | 1   | R.EGRPSGEAFVELESEDEVK.L                |
| *                  | HsFLAG-Control_293_Ti_20 | 5.8437 | 0.3308 | 2108.65 | 2108.22 | 10863.7 | 1    | 1674.2 | 61.1                                                      | 7   | R.EGRPSGEAFVELESEDEVK.L                |
| *                  | HsFLAG-Control_HeLa_NE   | 5.3875 | 0.3776 | 2108.7  | 2108.22 | 11194.7 | 1    | 1584.2 | 55.6                                                      | 5   | R.EGRPSGEAFVELESEDEVK.L                |
| *                  | HsFLAG-Control_MG_293_   | 4.0869 | 0.2013 | 1335.29 | 1335.52 | 4933    | 2    | 1053.6 | 85                                                        | 15  | K.SNNVEMDWVLK.H                        |
|                    | Hs293FLP-MG_Ti_204.147   | 3.8795 | 0.4268 | 1685.48 | 1685.75 | 7488.8  | 1    | 1436.6 | 70                                                        | 10  | K.HTGPNSPDTANDGFVR.L                   |
|                    | HsFLAG-Control_293_Ti_20 | 4.52   | 0.5046 | 1685.48 | 1685.75 | 8106.6  | 1    | 2099.2 | 80                                                        | 8   | K.HTGPNSPDTANDGFVR.L                   |
|                    | HsFLAG-Control_HeLa_NE   | 4.3166 | 0.4328 | 1686.3  | 1685.75 | 6792.2  | 1    | 914.4  | 63.3                                                      | 5   | K.HTGPNSPDTANDGFVR.L                   |
|                    | HsFLAG-Control_293_Ti_20 | 4.3669 | 0.2323 | 1686.72 | 1685.75 | 7063.6  | 3    | 1191.3 | 45                                                        | 1   | K.HTGPNSPDTANDGFVR.L                   |
|                    | HsFLAG-MOCK_300mM_T      | 4.0472 | 0.1915 | 1686.88 | 1685.75 | 5906.1  | 2    | 1316.5 | 48.3                                                      | 1   | K.HTGPNSPDTANDGFVR.L                   |
| *                  | HsGST-MOCK_Ti_105.400    | 5.3273 | 0.3492 | 3753.5  | 3753.26 | 4854    | 1    | 708.1  | 28                                                        | 12  | R.GLPFGCSKEEIVQFFSGLEIVPNGITLPVDFQGR.S |
| *                  | Hs293FLP-MG_Ti_203.501   | 3.6462 | 0.3545 | 2904.96 | 2906.31 | 4536.8  | 1    | 382.1  | 36                                                        | 9   | K.EEIVQFFSGLEIVPNGITLPVDFQGR.S         |
| *                  | Hs293FLP-MG_Ti_203.500   | 4.0783 | 0.278  | 2906.48 | 2906.31 | 7967.3  | 3    | 717.6  | 28                                                        | 2   | K.EEIVQFFSGLEIVPNGITLPVDFQGR.S         |
|                    | HsFlag1P_Ti_102.3107.310 | 5.4581 | 0.4545 | 1841.95 | 1843    | 8129.4  | 1    | 2087.4 | 71.9                                                      | 105 | R.STGEAFVQFASQIEAEK.A                  |
| *                  | Hs293FLP-MG_Ti_202.253   | 4.7384 | 0.5245 | 2717.6  | 2718.68 | 9239.1  | 1    | 1322.3 | 46                                                        | 10  | R.GAYGGGYGGYDDYNGYNDGYGFGSDR.F         |
|                    | HsFLAG-Control_293_Ti_20 | 3.8505 | 0.4656 | 1604.09 | 1602.68 | 9274.9  | 1    | 1651.1 | 79.2                                                      | 9   | R.DLNYCFSGMSDHR.Y                      |
| *                  | HsGST-MOCK_Ti_103.140    | 4.8165 | 0.4565 | 2099.34 | 2099.21 | 7000.7  | 1    | 867.5  | 50                                                        | 2   | R.YGDGGSTFQSTTGHCVHMR.G                |
|                    | HsFLAG-Control_HeLa_S10  | 3.9094 | 0.2338 | 1996.83 | 1998.2  | 9892.6  | 2    | 1192.3 | 40.6                                                      | 1   | R.ATENDIYNFFSPLNPVR.V                  |
|                    | HsFLAG-Control_HeLa_NE   | 4.6608 | 0.3601 | 1997.35 | 1998.2  | 7568.7  | 1    | 1568.7 | 68.8                                                      | 16  | R.ATENDIYNFFSPLNPVR.V                  |
|                    | HsFLAG-Control_293_Ti_20 | 4.7208 | 0.3986 | 1997.49 | 1998.2  | 7549.3  | 1    | 1676.5 | 71.9                                                      | 55  | R.ATENDIYNFFSPLNPVR.V                  |
|                    | HsGST-MOCK_Ti_403.397    | 4.7263 | 0.4323 | 1997.5  | 1998.2  | 7501    | 1    | 1361.2 | 65.6                                                      | 2   | R.ATENDIYNFFSPLNPVR.V                  |
|                    | HsFLAG-Control_HeLa_S10  | 4.3947 | 0.4897 | 1997.59 | 1998.2  | 7565.5  | 1    | 1326.5 | 65.6                                                      | 6   | R.ATENDIYNFFSPLNPVR.V                  |
|                    | HsFLAG-Control_HeLa_NE   | 4.2241 | 0.188  | 1998.1  | 1998.2  | 8148.8  | 8    | 882.3  | 35.9                                                      | 1   | R.ATENDIYNFFSPLNPVR.V                  |
|                    | HsFLAG-Control_HeLa_NE   | 5.2012 | 0.4834 | 1998.25 | 1998.2  | 8235.9  | 1    | 1839.9 | 68.8                                                      | 23  | R.ATENDIYNFFSPLNPVR.V                  |
|                    | Hs293FLP-MG_Ti_202.411   | 4.5072 | 0.2946 | 1998.27 | 1998.2  | 7716.3  | 1    | 1486.3 | 46.9                                                      | 2   | R.ATENDIYNFFSPLNPVR.V                  |
|                    | HsFLAG-Control_HeLa_NE   | 4.903  | 0.1706 | 1998.31 | 1998.2  | 8396.7  | 1    | 1484.8 | 43.8                                                      | 2   | R.ATENDIYNFFSPLNPVR.V                  |
|                    | HsFLAG-Control_HeLa_NE   | 2.6268 | 0.1908 | 1092.55 | 1093.23 | 6937.7  | 1    | 767.6  | 72.2                                                      | 2   | R.VHIEIGPDGR.V                         |
|                    | HsFLAG-Control_HeLa_NE   | 3.4554 | 0.2844 | 1093.46 | 1093.23 | 5275.7  | 1    | 1166.4 | 83.3                                                      | 16  | R.VHIEIGPDGR.V                         |
| *                  | HsFLAG-Control_HeLa_NE   | 5.218  | 0.3047 | 2178.77 | 2179.36 | 6666.4  | 1    | 839.3  | 52.5                                                      | 1   | R.VTGEADVEFATHEDAVAAMSK.D              |
| *                  | Hs293FLP-MG_Ti_204.237   | 3.7696 | 0.3407 | 2142.47 | 2143.32 | 9860.7  | 7    | 499.3  | 36.8                                                      | 2   | R.YVELFLNSTAGASGGAYEHR.Y               |
| gi 4504253 ref NF  |                          | 6      | 10     | 0.524   | 143     | 15145   | 10.7 | U      | H2A histone family, member X [Homo sapiens]               |     |                                        |
|                    | Hs293FLP-MG_Ti_104.190   | 2.3447 | 0.1182 | 944.77  | 945.109 | 4092.1  | 5    | 353.2  | 68.8                                                      | 1   | R.AGLQFPVGR.V                          |
|                    | HsHeLa_Control-MG_Ti_10  | 2.6626 | 0.17   | 945.58  | 945.109 | 3921    | 2    | 699.4  | 81.2                                                      | 1   | R.AGLQFPVGR.V                          |
|                    | HsFLAG-Control_HeLa_NE   | 4.5014 | 0.4747 | 2916.07 | 2917.38 | 7823.6  | 1    | 640.8  | 32.1                                                      | 1   | R.VGAGAPVYLAHVLEYLTAEILELAGNAAR.D      |
|                    | HsFLAG-Control_HeLa_NE   | 6.3703 | 0.4516 | 2916.71 | 2917.38 | 9322.9  | 1    | 2302   | 36.6                                                      | 3   | R.VGAGAPVYLAHVLEYLTAEILELAGNAAR.D      |
|                    | HsHeLa_Control-MG_Ti_10  | 3.6354 | 0.3585 | 1693.91 | 1693.9  | 7274.3  | 1    | 861.3  | 65.4                                                      | 1   | R.HLQLAIRNDEELNK.L                     |
|                    | Hs283FLP_Ti_106.2811.28  | 4.7386 | 0.3289 | 2273.16 | 2272.78 | 5689.3  | 1    | 869.1  | 50                                                        | 3   | K.LLGGVTIAQGGVLPNIQAVLLPK.K            |
| gi 29789090 ref NF |                          | 20     | 47     | 0.521   | 522     | 56085   | 8.8  | U      | RCC1-like [Homo sapiens]                                  |     |                                        |
| *                  | HsGST-MOCK_Ti_402.184    | 2.8898 | 0.207  | 1646.57 | 1646.71 | 6467.5  | 1    | 990.5  | 62.5                                                      | 2   | K.AAAAAWEEPSSGNGTAR.A                  |
| *                  | HsGST-MOCK_Ti_304.167    | 3.1528 | 0.3649 | 1479.5  | 1480.66 | 3588.5  | 1    | 531.3  | 60.7                                                      | 2   | K.AGGAVVITEPEHTK.E                     |
| *                  | HsGST-MOCK_Ti_405.402    | 5.0574 | 0.4111 | 1774.54 | 1775.06 | 7618    | 1    | 1663   | 70                                                        | 2   | K.GQLLIFGATNWDLIGR.K                   |
| *                  | HsGST-MOCK_Ti_405.217    | 5.0756 | 0.4468 | 1930.86 | 1932.15 | 9333.3  | 1    | 1708.3 | 61.1                                                      | 4   | R.TVVGSCAAHSLITTEGK.L                  |

|                    |                          |        |        |         |         |         |     |        |      |    |                                                                   |
|--------------------|--------------------------|--------|--------|---------|---------|---------|-----|--------|------|----|-------------------------------------------------------------------|
| *                  | HsGST-MOCK_Ti_102.180    | 4.4285 | 0.3943 | 1812.44 | 1812.04 | 8745.5  | 1   | 1634.9 | 62.5 | 2  | R.LIEGLSHEVIVSAACGR.N                                             |
| *                  | HsGST-MOCK_Ti_305.279    | 6.3428 | 0.5101 | 2036.16 | 2037.24 | 10365.5 | 1   | 3331.7 | 75   | 5  | R.NHTLALTETGSVFAFGENK.M                                           |
| *                  | HsGST-MOCK_Ti_304.295    | 3.4701 | 0.3277 | 2931.96 | 2931.35 | 3899.5  | 1   | 191.7  | 29.6 | 2  | K.MGQLGLGNQTDVPSPAQIMYNGQPITK.M                                   |
| *                  | HsGST-MOCK_Ti_404.233    | 3.7365 | 0.372  | 2301.81 | 2301.4  | 7496    | 1   | 838.7  | 50   | 3  | K.GNLYSFGCPEYQQLGHNSDGK.F                                         |
| *                  | HsFlag1P_Ti_104.2075.207 | 3.7798 | 0.3097 | 1649.53 | 1649.81 | 6249.9  | 1   | 951    | 70.8 | 1  | R.AQRIEYDCELVPR.R                                                 |
| *                  | HsGST-MOCK_Ti_402.222    | 3.1293 | 0.2058 | 1294.21 | 1294.41 | 5111.6  | 1   | 822.4  | 77.8 | 2  | R.IEYDCELVPR.R                                                    |
| *                  | HsGST-MOCK_Ti_303.268    | 2.4102 | 0.3025 | 1405.97 | 1406.67 | 2740.4  | 4   | 219.1  | 54.2 | 1  | K.DGQILPVPNVVVR.D                                                 |
| *                  | HsGST-MOCK_Ti_403.195    | 4.6763 | 0.3193 | 1727.77 | 1728.87 | 7949.8  | 1   | 1545.3 | 70   | 1  | R.DVACGANHTLVLDSSQK.R                                             |
| *                  | HsGST-MOCK_Ti_104.190    | 4.2867 | 0.4079 | 1390.62 | 1389.56 | 6783.2  | 1   | 1525.4 | 86.4 | 2  | K.RVFSWGFGGYGR.L                                                  |
| *                  | HsGST-MOCK_Ti_104.190    | 3.623  | 0.23   | 1391.17 | 1389.56 | 4849.7  | 1   | 1273.7 | 59.1 | 1  | K.RVFSWGFGGYGR.L                                                  |
| *                  | HsGST-MOCK_Ti_404.299    | 3.1485 | 0.3256 | 1233.21 | 1233.37 | 5594.9  | 1   | 1233.3 | 90   | 2  | R.VFSWGFGGYGR.L                                                   |
| *                  | HsGST-MOCK_Ti_103.121    | 2.4972 | 0.3418 | 1509.45 | 1510.71 | 4721.8  | 1   | 420.8  | 58.3 | 2  | R.LGHAEQKDEMVPR.L                                                 |
| *                  | HsGST-MOCK_Ti_103.122    | 4.8519 | 0.4212 | 1509.72 | 1510.71 | 9446.1  | 1   | 1631.2 | 75   | 2  | R.LGHAEQKDEMVPR.L                                                 |
| *                  | HsFLAG-MOCK_300mM_T      | 2.8123 | 0.2596 | 1512.67 | 1510.71 | 7010    | 3   | 568.2  | 54.2 | 1  | R.LGHAEQKDEMVPR.L                                                 |
| *                  | HsGST-MOCK_Ti_105.240    | 4.4888 | 0.4242 | 3248.64 | 3248.57 | 6476.2  | 2   | 510.3  | 23.3 | 6  | K.SSIIVAADESTISWGSPSTFGELGYGDHKKP.S                               |
| *                  | HsGST-MOCK_Ti_404.358    | 4.8221 | 0.4949 | 2395.08 | 2395.74 | 8174.8  | 1   | 946.3  | 47.6 | 4  | K.TLDGIFSEQVAMGYSHSLVIAR.D                                        |
| gi 4506669 ref NF  |                          | 2      | 16     | 0.518   | 114     | 11514   | 4.3 | U      |      |    | ribosomal protein P1 isoform 1 [Homo sapiens]                     |
|                    | HsFLAG-Control_293_Ti_10 | 3.9399 | 0.3506 | 1703.47 | 1703.98 | 3992.8  | 1   | 673.5  | 63.3 | 12 | K.AAGVNVPEPFWPGLFAK.A<br>K.ALANVNIIGSLICNVGAGGPAPAAGAAPAGGPAPSTAA |
|                    | HsFLAG-Control_293_Ti_10 | 7.3279 | 0.4978 | 3812.24 | 3811.21 | 10758.7 | 1   | 2253.2 | 28.6 | 4  | APAEEK.K                                                          |
| gi 4502599 ref NF  |                          | 13     | 28     | 0.513   | 277     | 30375   | 8.3 | U      |      |    | carbonyl reductase 1 [Homo sapiens]                               |
| *                  | HsGST-MOCK_Ti_303.230    | 3.8946 | 0.2466 | 1178.34 | 1178.37 | 6386.9  | 1   | 1462.3 | 90   | 2  | R.LFSGDVVLTAR.D                                                   |
| *                  | HsGST-MOCK_Ti_303.196    | 5.0904 | 0.2499 | 1654.31 | 1653.84 | 7891.5  | 1   | 1910.3 | 73.3 | 1  | R.GQAAVQQLQAEGLSPR.F                                              |
| *                  | HsGST-MOCK_Ti_304.242    | 4.7586 | 0.2392 | 1600.73 | 1600.77 | 9739.2  | 1   | 2194.6 | 83.3 | 1  | R.FHQLDIDDLQSIR.A                                                 |
| *                  | HsGST-MOCK_Ti_302.350    | 4.7012 | 0.2856 | 1780.53 | 1781.02 | 7479.8  | 1   | 1872.8 | 78.1 | 1  | K.EYGGDLVNVNAGIAFK.V                                              |
| *                  | HsGST-MOCK_Ti_302.317    | 2.8075 | 0.0893 | 1300.42 | 1301.53 | 6252.2  | 9   | 599.8  | 60   | 1  | R.DVCTELLPLIK.P                                                   |
| *                  | HsGST-MOCK_Ti_302.317    | 3.4093 | 0.1778 | 1301.07 | 1301.53 | 5216.7  | 2   | 1168.8 | 85   | 2  | R.DVCTELLPLIK.P                                                   |
| *                  | HsGST-MOCK_Ti_305.296    | 3.7947 | 0.2278 | 1739.3  | 1740.02 | 5609.3  | 1   | 634.6  | 57.1 | 2  | R.DVCTELLPLIKPQGR.V                                               |
| *                  | HsGST-MOCK_Ti_303.241    | 4.063  | 0.3569 | 1191.31 | 1191.43 | 6108.7  | 1   | 1306.2 | 85   | 2  | R.VNVSSIMSVR.A                                                    |
| *                  | HsGST-MOCK_Ti_304.291    | 5.4083 | 0.4569 | 1996.51 | 1997.27 | 5587.2  | 1   | 2030.9 | 84.4 | 3  | K.FRSETITEEELVGLMKN.F                                             |
| *                  | HsGST-MOCK_Ti_302.297    | 4.3491 | 0.3224 | 1693.51 | 1693.91 | 7965.2  | 1   | 2063.3 | 78.6 | 2  | R.SETITEEELVGLMKN.F                                               |
| *                  | HsGST-MOCK_Ti_302.191    | 2.0357 | 0.124  | 1281.36 | 1282.4  | 2795.4  | 1   | 230.7  | 63.6 | 1  | K.EGWSSAYGVTK.I                                                   |
| *                  | HsGST-MOCK_Ti_303.335    | 5.8876 | 0.4098 | 3164.36 | 3166.47 | 6329.5  | 1   | 1417.8 | 33.6 | 8  | K.SPEEGAETPVYLALLPPDAEGPHGQFVSEK.R                                |
| *                  | HsGST-MOCK_Ti_303.334    | 3.202  | 0.1586 | 3165.01 | 3166.47 | 3673.9  | 1   | 262.3  | 31   | 2  | K.SPEEGAETPVYLALLPPDAEGPHGQFVSEK.R                                |
| gi 23111018 ref NF |                          | 94     | 361    | 0.511   | 852     | 94370   | 6.7 | U      |      |    | RNA binding motif protein 10 isoform 2 [Homo sapiens]             |
|                    | HsFlag1P_Ti_106.2224.222 | 2.5407 | 0.2286 | 1630.04 | 1629.7  | 7053.6  | 4   | 440.5  | 59.1 | 1  | R.SRDHYRDMYR.S                                                    |
|                    | Hs293FLP_Ti_305.1079.10  | 2.0714 | 0.0834 | 1180.5  | 1181.3  | 4592    | 9   | 300.7  | 60   | 1  | R.GQLQSHGVQAR.E                                                   |
|                    | Hs293FLP-MG_Ti_205.125   | 3.6294 | 0.3232 | 1180.54 | 1181.3  | 8588.5  | 1   | 1165.7 | 75   | 8  | R.GQLQSHGVQAR.E                                                   |
|                    | HsHeLa_Control-MG_Ti_10  | 2.1742 | 0.0972 | 1180.87 | 1181.3  | 4327.4  | 5   | 317.3  | 60   | 1  | R.GQLQSHGVQAR.E                                                   |
|                    | Hs293FLP_TREX_Ti_105.1   | 3.6954 | 0.3178 | 1181.18 | 1181.3  | 6944    | 1   | 1068.5 | 75   | 19 | R.GQLQSHGVQAR.E                                                   |
|                    | HsFLAG-Control_MG_293_   | 3.6442 | 0.3241 | 1181.36 | 1181.3  | 6267.1  | 1   | 1113.3 | 85   | 2  | R.GQLQSHGVQAR.E                                                   |
|                    | HsFLAG-Control_MG_293_   | 2.4    | 0.155  | 1181.45 | 1181.3  | 5409.5  | 6   | 363.8  | 60   | 1  | R.GQLQSHGVQAR.E                                                   |
|                    | HsFLAG-Control_Hela_Ti_1 | 3.7211 | 0.2977 | 1182.21 | 1181.3  | 7236.5  | 1   | 1331.3 | 85   | 5  | R.GQLQSHGVQAR.E                                                   |
|                    | HsFLAG-Control_HeLa_NE   | 4.4983 | 0.428  | 1725.08 | 1725.9  | 9222    | 1   | 1748.1 | 71.4 | 6  | R.GFADFVEFSLQDATR.W                                               |
|                    | HsHeLa_Control-MG_Ti_20  | 5.1413 | 0.5023 | 1725.1  | 1725.9  | 7337.8  | 1   | 1979.5 | 82.1 | 5  | R.GFADFVEFSLQDATR.W                                               |
|                    | HsHeLa_Control-MG_Ti_20  | 3.5406 | 0.2981 | 1726.86 | 1725.9  | 5898.5  | 1   | 1256.7 | 48.2 | 1  | R.GFADFVEFSLQDATR.W                                               |
|                    | HsHeLa_Control-MG_Ti_10  | 3.7665 | 0.3034 | 1727.27 | 1725.9  | 5166.5  | 1   | 1323.2 | 50   | 1  | R.GFADFVEFSLQDATR.W                                               |
|                    | HsHeLa_Control_Ti_104.33 | 3.5384 | 0.185  | 1727.47 | 1725.9  | 5135.4  | 1   | 1320   | 50   | 1  | R.GFADFVEFSLQDATR.W                                               |
|                    | HsHeLa_Control_Ti_104.33 | 4.4451 | 0.446  | 1727.77 | 1725.9  | 5795.7  | 1   | 1557.3 | 78.6 | 5  | R.GFADFVEFSLQDATR.W                                               |

|                          |        |        |         |         |        |   |        |      |                                         |
|--------------------------|--------|--------|---------|---------|--------|---|--------|------|-----------------------------------------|
| Hs293FLP_Ti_304.2631.26  | 4.6098 | 0.3769 | 1727.85 | 1725.9  | 6756.5 | 1 | 2053   | 82.1 | 14 R.GFAFVEFSLQDATR.W                   |
| HsFlag1P_Ti_106.2548.254 | 5.4069 | 0.4044 | 1770.27 | 1770.02 | 9851.6 | 1 | 2367.9 | 78.6 | 9 R.WMEANQHSLNILGQK.V                   |
| HsFLAG-MOCK_300mM_T      | 2.2163 | 0.2357 | 1288.63 | 1289.49 | 3618.1 | 3 | 353.9  | 65   | 1 K.VSMHYSDPKPK.I                       |
| HsFlag1P_Ti_102.2178.217 | 2.5288 | 0.1476 | 1191.29 | 1192.28 | 6235.8 | 1 | 522.5  | 68.8 | 2 K.INEDWLCNK.C                         |
| HsHeLa_Control-MG_Ti_10  | 2.5844 | 0.2116 | 1191.58 | 1192.28 | 5788.1 | 5 | 514.7  | 68.8 | 2 K.INEDWLCNK.C                         |
| Hs293FLP-MG_Ti_102.206   | 2.5039 | 0.2577 | 1191.66 | 1192.28 | 6146.3 | 4 | 447.5  | 62.5 | 1 K.INEDWLCNK.C                         |
| HsHeLa_Control-MG_Ti_10  | 3.3874 | 0.219  | 1192.72 | 1192.28 | 6003.4 | 1 | 1106.1 | 87.5 | 4 K.INEDWLCNK.C                         |
| HsFLAG-Control_HeLa_NE   | 3.3236 | 0.2222 | 1193.33 | 1192.28 | 8126.2 | 1 | 1244.4 | 87.5 | 1 K.INEDWLCNK.C                         |
| HsHeLa_Control-MG_Ti_10  | 4.0826 | 0.1948 | 1329.89 | 1329.5  | 4900.3 | 3 | 1121.7 | 77.3 | 4 K.SEAQKPLPLGTR.L                      |
| HsHeLa_Control-MG_Ti_20  | 4.268  | 0.2497 | 1198.4  | 1198.37 | 5439.1 | 1 | 1362.7 | 95   | 11 R.LDQQTLPLGGR.E                      |
|                          |        |        |         |         |        |   |        |      | R.ELSQGLLPLPQPYQAQGVLASQALSQGSEPSSEANAN |
| Hs293FLP-MG_Ti_202.410   | 3.9939 | 0.3174 | 4422.41 | 4422.89 | 6400.9 | 1 | 450.6  | 18.3 | 2 DTIILR.N                              |
| HsHeLa_Control-MG_Ti_20  | 4.744  | 0.4219 | 2827.69 | 2829.2  | 7040   | 1 | 1139.3 | 46.2 | 2 R.NLNPHSTMDSILGALAPYAVLSSSNVR.V       |
| Hs293FLP-MG_Ti_205.408   | 4.6483 | 0.241  | 2827.95 | 2829.2  | 7557.1 | 1 | 1217.4 | 32.7 | 2 R.NLNPHSTMDSILGALAPYAVLSSSNVR.V       |
| HsHeLa_Control-MG_Ti_20  | 4.3762 | 0.3177 | 2828.64 | 2829.2  | 9567.3 | 1 | 1478.4 | 31.7 | 2 R.NLNPHSTMDSILGALAPYAVLSSSNVR.V       |
| Hs293FLP-MG_Ti_205.407   | 4.4509 | 0.338  | 2828.76 | 2829.2  | 6829.3 | 1 | 1296.6 | 48.1 | 1 R.NLNPHSTMDSILGALAPYAVLSSSNVR.V       |
| HsHeLa_Control-MG_Ti_10  | 3.6661 | 0.3442 | 2829.29 | 2829.2  | 5739.5 | 1 | 766.7  | 40.4 | 2 R.NLNPHSTMDSILGALAPYAVLSSSNVR.V       |
| Hs293FLP_Ti_306.3446.34  | 3.9379 | 0.2906 | 2829.35 | 2829.2  | 5898.9 | 1 | 721.8  | 40.4 | 2 R.NLNPHSTMDSILGALAPYAVLSSSNVR.V       |
| HsHeLa_Control-MG_Ti_10  | 4.3703 | 0.1372 | 2829.81 | 2829.2  | 6719   | 1 | 1090.2 | 30.8 | 1 R.NLNPHSTMDSILGALAPYAVLSSSNVR.V       |
| Hs293FLP_Ti_305.3753.37  | 4.3448 | 0.2356 | 2830    | 2829.2  | 6641.3 | 4 | 744.9  | 28.8 | 2 R.NLNPHSTMDSILGALAPYAVLSSSNVR.V       |
| HsFLAG-Control_HeLa_NE   | 4.5891 | 0.294  | 3348.99 | 3348.95 | 7749.5 | 1 | 835.3  | 25.8 | 1 R.GFAFIQLSTIEAAQLLQILQALHPPLTIDGK.T   |
| HsHeLa_Control-MG_Ti_20  | 2.2886 | 0.2035 | 921.4   | 922.069 | 5470.9 | 9 | 408.5  | 71.4 | 7 K.TINVEFAK.G                          |
| Hs293FLP-MG_Ti_202.201   | 2.7263 | 0.1106 | 922.33  | 922.069 | 2462.9 | 3 | 513.4  | 85.7 | 1 K.TINVEFAK.G                          |
|                          |        |        |         |         |        |   |        |      | K.GTKGPGITGKGDPTGAGPEASLEPGADSVSMQAFS   |
| Hs293FLP-MG_Ti_205.217   | 4.5107 | 0.2996 | 3533.36 | 3533.85 | 6108.9 | 2 | 464.7  | 21.5 | 1 R.A                                   |
| HsF-IP-293-MG_Ti_102.21  | 5.6979 | 0.3628 | 2534.89 | 2535.7  | 4435.1 | 1 | 791.4  | 52   | 15 K.GDPTGAGPEASLEPGADSVSMQAFSR.A       |
|                          |        |        |         |         |        |   |        |      | R.AQPGAAPGIYQQSAEASSSQGTAANSQSYSYTIMSPA |
| HsFlag1P_Ti_105.2566.256 | 8.1089 | 0.5995 | 3768.76 | 3770.12 | 8722.1 | 1 | 2327.2 | 33.1 | 27 LK.S                                 |
| Hs293FLP-MG_Ti_103.160   | 2.3072 | 0.2638 | 1515.64 | 1516.65 | 4750.8 | 1 | 419.4  | 61.5 | 2 R.TYVPALEQSADGHK.E                    |
| Hs293FLP_TREX_Ti_103.1   | 3.631  | 0.3802 | 1516.44 | 1516.65 | 4525.3 | 1 | 903.2  | 80.8 | 4 R.TYVPALEQSADGHK.E                    |
| Hs293FLP-MG_Ti_203.168   | 2.3773 | 0.2259 | 1516.6  | 1516.65 | 5973.5 | 1 | 317.8  | 50   | 2 R.TYVPALEQSADGHK.E                    |
| Hs283FLP_Ti_103.1435.14  | 2.5233 | 0.2224 | 1516.62 | 1516.65 | 4188.9 | 1 | 464.4  | 65.4 | 1 R.TYVPALEQSADGHK.E                    |
| HsHeLa_Control-MG_Ti_20  | 4.0518 | 0.3786 | 1517.43 | 1516.65 | 4765   | 1 | 782.5  | 73.1 | 6 R.TYVPALEQSADGHK.E                    |
| Hs293FLP-MG_Ti_203.168   | 3.4167 | 0.2487 | 1517.45 | 1516.65 | 4200   | 1 | 546.1  | 65.4 | 2 R.TYVPALEQSADGHK.E                    |
| Hs293FLP-MG_Ti_103.159   | 3.3858 | 0.3642 | 1517.82 | 1516.65 | 4231.1 | 1 | 747    | 76.9 | 2 R.TYVPALEQSADGHK.E                    |
| HsHeLa_Control-MG_Ti_10  | 4.4337 | 0.4303 | 2186.84 | 2187.37 | 6324.5 | 1 | 968.6  | 57.5 | 3 R.TYVPALEQSADGHKTKETGAPSK.E           |
| Hs293FLP-MG_Ti_203.199   | 2.0984 | 0.1654 | 1148.47 | 1149.29 | 2716.5 | 2 | 191.1  | 72.2 | 1 K.NSFQPISSLR.D                        |
| HsF-IP-293-MG_Ti_103.16  | 2.365  | 0.2641 | 1148.48 | 1149.29 | 2091.8 | 2 | 135.1  | 72.2 | 1 K.NSFQPISSLR.D                        |
| Hs283FLP_Ti_103.1627.16  | 2.9629 | 0.2357 | 1149.47 | 1149.29 | 4091.4 | 3 | 674.4  | 83.3 | 3 K.NSFQPISSLR.D                        |
| Hs293FLP-MG_Ti_203.199   | 2.7046 | 0.1925 | 1149.5  | 1149.29 | 4283.9 | 2 | 665.6  | 83.3 | 1 K.NSFQPISSLR.D                        |
| HsF-IP-293-MG_Ti_103.167 | 2.6274 | 0.166  | 1149.51 | 1149.29 | 3712.3 | 6 | 532.3  | 77.8 | 1 K.NSFQPISSLR.D                        |
| Hs283FLP_Ti_102.1766.17  | 2.3318 | 0.2714 | 1438.55 | 1439.56 | 2791.5 | 1 | 271.1  | 57.7 | 1 R.ESATADAGYAILEK.K                    |
| HsHeLa_Control-MG_Ti_10  | 2.316  | 0.3256 | 1438.7  | 1439.56 | 3518   | 1 | 413.2  | 65.4 | 1 R.ESATADAGYAILEK.K                    |
| Hs293FLP-MG_Ti_102.207   | 2.4671 | 0.2685 | 1438.74 | 1439.56 | 3187.7 | 1 | 338.2  | 61.5 | 2 R.ESATADAGYAILEK.K                    |
| HsFLAG-Control_HeLa_NE   | 4.2382 | 0.3887 | 1438.91 | 1439.56 | 7071.8 | 1 | 2220.1 | 84.6 | 14 R.ESATADAGYAILEK.K                   |
| HsF-IP-293-MG_Ti_102.17  | 4.35   | 0.3192 | 1439.56 | 1439.56 | 6814.5 | 1 | 2014.1 | 84.6 | 8 R.ESATADAGYAILEK.K                    |
| HsHeLa_Control-MG_Ti_10  | 4.2312 | 0.3601 | 1439.78 | 1439.56 | 6549.5 | 1 | 1890.2 | 84.6 | 6 R.ESATADAGYAILEK.K                    |
| Hs293FLP-MG_Ti_202.021   | 4.0079 | 0.3795 | 1441.63 | 1439.56 | 6912.8 | 1 | 1504   | 73.1 | 8 R.ESATADAGYAILEK.K                    |
| HsHeLa_Control-MG_Ti_10  | 2.5786 | 0.0966 | 1214.14 | 1211.32 | 5412.3 | 2 | 491.2  | 70   | 1 K.LASDDRSPPPR.G                       |



|                           |        |        |         |         |         |       |                                                            |      |                                    |
|---------------------------|--------|--------|---------|---------|---------|-------|------------------------------------------------------------|------|------------------------------------|
| HsF-IP-293-MG_Ti_106.184  | 2.4745 | 0.1137 | 1047.51 | 1048.19 | 4077    | 1     | 391.5                                                      | 75   | 1 R.HQQLSGLHK.Q                    |
| HsHeLa_Control-MG_Ti_10   | 2.4092 | 0.1628 | 1047.79 | 1048.19 | 4590    | 2     | 384.7                                                      | 68.8 | 1 R.HQQLSGLHK.Q                    |
| HsFLAG-Control_HeLa_NE    | 3.11   | 0.0924 | 1048.24 | 1048.19 | 6182.4  | 2     | 842.8                                                      | 81.2 | 1 R.HQQLSGLHK.Q                    |
| HsHeLa_Control-MG_Ti_10   | 3.0269 | 0.0993 | 1048.83 | 1048.19 | 5767    | 1     | 830                                                        | 87.5 | 2 R.HQQLSGLHK.Q                    |
| Hs293FLP-MG_Ti_205.181    | 4.0299 | 0.2007 | 1639.64 | 1639.81 | 9684.4  | 1     | 1669.7                                                     | 73.1 | 5 R.RAHLSENELEALEK.N               |
| HsHeLa_Control-MG_Ti_20   | 2.7825 | 0.2137 | 1482.46 | 1483.62 | 4364.5  | 1     | 524.8                                                      | 58.3 | 2 R.AHLSENELEALEK.N                |
| Hs293FLP-MG_Ti_203.192    | 3.0185 | 0.184  | 1482.55 | 1483.62 | 6558.5  | 1     | 832.2                                                      | 62.5 | 2 R.AHLSENELEALEK.N                |
| Hs293FLP_Ti_303.1679.16   | 3.2309 | 0.2489 | 1482.74 | 1483.62 | 4590.3  | 1     | 575.5                                                      | 58.3 | 1 R.AHLSENELEALEK.N                |
| HsHeLa_Control-MG_Ti_20   | 4.5638 | 0.392  | 1482.83 | 1483.62 | 5983    | 1     | 1394.1                                                     | 87.5 | 1 R.AHLSENELEALEK.N                |
| HsFLAG-Control_HeLa_NE    | 4.4097 | 0.3893 | 1482.85 | 1483.62 | 5190.9  | 1     | 1433.6                                                     | 87.5 | 10 R.AHLSENELEALEK.N               |
| HsF-IP-293-MG_Ti_104.167  | 4.1295 | 0.3485 | 1483.29 | 1483.62 | 5072.4  | 1     | 1215.8                                                     | 83.3 | 13 R.AHLSENELEALEK.N               |
| Hs293FLP-MG_Ti_203.191    | 4.5868 | 0.4135 | 1483.59 | 1483.62 | 5865.6  | 1     | 1531.2                                                     | 87.5 | 2 R.AHLSENELEALEK.N                |
| Hs283FLP_Ti_104.1561.15   | 3.0485 | 0.1979 | 1483.62 | 1483.62 | 5321.1  | 1     | 794.7                                                      | 66.7 | 1 R.AHLSENELEALEK.N                |
| Hs283FLP_Ti_104.1553.15   | 3.1976 | 0.1039 | 1484.25 | 1483.62 | 5841    | 1     | 1053.8                                                     | 83.3 | 1 R.AHLSENELEALEK.N                |
| HsHeLa_Control-MG_Ti_20   | 1.8126 | 0.082  | 1126.5  | 1127.28 | 3899.3  | 7     | 331.7                                                      | 55.6 | 1 K.YGIPEPPEPK.R                   |
| HsHeLa_Control-MG_Ti_10   | 5.1422 | 0.4216 | 1858.36 | 1857.03 | 5259.6  | 1     | 2001.7                                                     | 78.1 | 5 R.KYGGISTASVDFEQPTR.D            |
| HsFlag1P_Ti_105.2252.225  | 3.8658 | 0.2669 | 2928.17 | 2929.13 | 7617.4  | 1     | 979                                                        | 30.6 | 1 R.KYGGISTASVDFEQPTRDGLGSDNIGSR.M |
| HsHeLa_Control-MG_Ti_20   | 4.949  | 0.4651 | 1729.63 | 1728.86 | 7850.2  | 1     | 1414.2                                                     | 66.7 | 18 K.YGGISTASVDFEQPTR.D            |
| HsHeLa_Control-MG_Ti_10   | 3.6549 | 0.302  | 1091.59 | 1091.12 | 4011.7  | 1     | 771.8                                                      | 80   | 8 R.DGLGSDNIGSR.M                  |
| HsFlag1P_Ti_106.2481.248  | 1.9421 | 0.1137 | 964.4   | 965.217 | 6583.3  | 9     | 683.2                                                      | 78.6 | 1 R.MLQAMGWK.E                     |
| HsHeLa_Control-MG_Ti_20   | 3.5071 | 0.2445 | 1441.52 | 1441.67 | 7138.2  | 2     | 922.8                                                      | 66.7 | 5 K.KQGIVTPIEAQTR.V                |
| HsFlag1P_Ti_104.1989.198  | 2.9007 | 0.1916 | 1312.69 | 1313.5  | 4627.4  | 1     | 905.9                                                      | 86.4 | 5 K.QGIVTPIEAQTR.V                 |
| HsFLAG-Control_HeLa_NE    | 2.3634 | 0.3301 | 1365.35 | 1366.42 | 6452.2  | 1     | 485.8                                                      | 58.3 | 1 R.GSSYGVSTESYK.E                 |
| HsFLAG-Control_Hela_Ti_1  | 1.9639 | 0.2699 | 1365.46 | 1366.42 | 5462.4  | 1     | 384.5                                                      | 54.2 | 1 R.GSSYGVSTESYK.E                 |
| HsF-IP-293-MG_Ti_102.139  | 2.4856 | 0.1599 | 1365.47 | 1366.42 | 5114.6  | 7     | 231.4                                                      | 45.8 | 1 R.GSSYGVSTESYK.E                 |
| Hs283FLP_Ti_102.1346.13   | 2.5386 | 0.2461 | 1365.55 | 1366.42 | 4936.9  | 1     | 367.9                                                      | 54.2 | 1 R.GSSYGVSTESYK.E                 |
| HsHeLa_Control_Ti_102.13  | 2.2511 | 0.1992 | 1365.6  | 1366.42 | 5313.6  | 1     | 413.7                                                      | 54.2 | 1 R.GSSYGVSTESYK.E                 |
| HsHeLa_Control-MG_Ti_20   | 3.5419 | 0.3333 | 1366.19 | 1366.42 | 6111.3  | 1     | 1364.2                                                     | 79.2 | 8 R.GSSYGVSTESYK.E                 |
| HsF-IP-293-MG_Ti_102.139  | 3.6824 | 0.3676 | 1366.37 | 1366.42 | 4805.4  | 1     | 1076.5                                                     | 79.2 | 6 R.GSSYGVSTESYK.E                 |
| HsFLAG-Control_Hela_Ti_1  | 2.8624 | 0.2878 | 1366.45 | 1366.42 | 6229.7  | 1     | 878.7                                                      | 66.7 | 2 R.GSSYGVSTESYK.E                 |
| Hs293FLP_TREX_Ti_102.1    | 2.8776 | 0.2978 | 1366.45 | 1366.42 | 5552.4  | 1     | 747.8                                                      | 66.7 | 1 R.GSSYGVSTESYK.E                 |
| HsHelaFlag1P_Ti_102.1344  | 2.5134 | 0.3016 | 1367.41 | 1366.42 | 3939.1  | 2     | 358.8                                                      | 50   | 2 R.GSSYGVSTESYK.E                 |
| HsHeLa_Control_Ti_102.13  | 2.8562 | 0.29   | 1368.53 | 1366.42 | 4229.4  | 1     | 562.3                                                      | 62.5 | 2 R.GSSYGVSTESYK.E                 |
| HsFlag1P_Ti_105.1812.181  | 4.2098 | 0.5065 | 1974.1  | 1975.12 | 7301.3  | 1     | 778.5                                                      | 50   | 4 R.GSSYGVSTESYKETLHK.T            |
| gil 5174525 ref NF        | 136    | 566    | 0.507   | 2468    | 270618  | 4.8 U | microtubule-associated protein 1B isoform 1 [Homo sapiens] |      |                                    |
| * HsHeLa_Control-MG_Ti_20 | 6.0913 | 0.4531 | 2017.72 | 2017.38 | 6427.7  | 1     | 2433.7                                                     | 84.4 | 3 K.FYLLVVVGEIVTEEHLR.R            |
| * Hs293FLP-MG_Ti_203.229  | 4.0032 | 0.2013 | 1056.35 | 1056.25 | 5961    | 1     | 1138.9                                                     | 88.9 | 7 R.AIGNIELGIR.S                   |
| * Hs293FLP-MG_Ti_202.350  | 4.9865 | 0.4022 | 1979.25 | 1979.12 | 5732.8  | 1     | 1404.5                                                     | 76.7 | 8 R.SWDTNLIENLDQELK.L              |
| * Hs293FLP-MG_Ti_203.160  | 1.8871 | 0.1262 | 988.49  | 989.116 | 4637.5  | 5     | 438.3                                                      | 68.8 | 1 R.FSPEVPGQK.I                    |
| * HsHeLa_Control-MG_Ti_20 | 4.7432 | 0.3926 | 2372.1  | 2373.62 | 5621.2  | 1     | 914.4                                                      | 54.8 | 25 R.SDVLETVVLINPSDEAVSTEV.R.L     |
| * Hs293FLP-MG_Ti_203.342  | 3.5416 | 0.1604 | 2373.38 | 2373.62 | 6283.2  | 2     | 679.6                                                      | 32.1 | 1 R.SDVLETVVLINPSDEAVSTEV.R.L      |
| Hs293FLP-MG_Ti_202.318    | 3.2766 | 0.3084 | 1653.22 | 1653.8  | 5091.7  | 1     | 1156                                                       | 73.1 | 4 K.ASLTLFCPEEGDWK.N               |
| Hs293FLP-MG_Ti_205.226    | 3.5391 | 0.242  | 1942.27 | 1942.14 | 10707.4 | 1     | 964.5                                                      | 56.7 | 2 K.NSNLDRHNLQDFINIK.L             |
| Hs293FLP-MG_Ti_204.232    | 3.3554 | 0.2167 | 1241.44 | 1242.42 | 5780.4  | 3     | 597.7                                                      | 72.2 | 1 R.HNLQDFINIK.L                   |
| HsHeLa_Control-MG_Ti_20   | 4.05   | 0.2699 | 1242.44 | 1242.42 | 7267.4  | 1     | 1343.2                                                     | 83.3 | 3 R.HNLQDFINIK.L                   |
| Hs293FLP-MG_Ti_204.232    | 4.1106 | 0.2474 | 1242.47 | 1242.42 | 7042.5  | 1     | 1459.4                                                     | 88.9 | 2 R.HNLQDFINIK.L                   |
| HsF-IP-293-MG_Ti_104.319  | 2.6792 | 0.1203 | 2171.1  | 2170.41 | 12460.9 | 3     | 673.8                                                      | 40   | 2 R.GDSALFAVNGFNMLINGGSR.K         |
| Hs293FLP-MG_Ti_206.323    | 5.5237 | 0.4565 | 3044.02 | 3044.46 | 9958.3  | 1     | 2245.4                                                     | 38.5 | 1 R.HLDRVDSILLTHIGDDNLPINSMLQR.K   |
| HsHeLa_Control-MG_Ti_20   | 5.6005 | 0.3793 | 2082.98 | 2082.45 | 7399.5  | 1     | 1858.5                                                     | 69.4 | 58 K.NLISPDGLGVFLNVPENLK.N         |

|                          |        |        |         |         |         |   |        |      |                                             |
|--------------------------|--------|--------|---------|---------|---------|---|--------|------|---------------------------------------------|
| Hs293FLP-MG_Ti_203.427   | 3.5417 | 0.1097 | 2083.28 | 2082.45 | 6755.8  | 1 | 1284.7 | 41.7 | 1 K.NLISPDLGVVFLNVPENLK.N                   |
| Hs293FLP-MG_Ti_204.248   | 4.1818 | 0.4096 | 1872.11 | 1873.08 | 8665.5  | 1 | 1156.4 | 64.3 | 3 K.RSIEEACFTLQYLNK.L                       |
| Hs293FLP-MG_Ti_203.286   | 4.6785 | 0.4389 | 1716.63 | 1716.9  | 9676.1  | 1 | 1809.4 | 73.1 | 2 R.SIEEACFTLQYLNK.L                        |
| HsHeLa_Control-MG_Ti_20  | 4.9455 | 0.395  | 1531.36 | 1531.79 | 6385.7  | 1 | 1473.7 | 80.8 | 10 R.SVGNTIDPVILFQK.M                       |
| Hs293FLP-MG_Ti_202.329   | 4.0307 | 0.3855 | 1531.46 | 1531.79 | 6826.7  | 1 | 1107.4 | 69.2 | 2 R.SVGNTIDPVILFQK.M                        |
| Hs293FLP-MG_Ti_202.330   | 3.1329 | 0.3564 | 1531.58 | 1531.79 | 4917.5  | 1 | 516.8  | 57.7 | 1 R.SVGNTIDPVILFQK.M                        |
| HsHeLa_Control-MG_Ti_20  | 3.1108 | 0.4134 | 1531.67 | 1531.79 | 4271.8  | 1 | 348.1  | 53.8 | 2 R.SVGNTIDPVILFQK.M                        |
| HsHeLa_Control-MG_Ti_20  | 4.4383 | 0.4054 | 4081.77 | 4080.63 | 7622.1  | 1 | 897.1  | 25.7 | 1 K.DKAEFILPNGQEVDLPISYLTSSVSLIVWHPANPAEK.I |
| HsHeLa_Control-MG_Ti_20  | 4.3593 | 0.4006 | 3834.66 | 3837.36 | 3367.6  | 1 | 408.9  | 26.5 | 5 K.AEFILPNGQEVDLPISYLTSSVSLIVWHPANPAEK.I   |
| HsHeLa_Control-MG_Ti_20  | 4.821  | 0.3361 | 2023.32 | 2023.29 | 3476    | 1 | 702.4  | 73.5 | 18 R.VLFPGNSTQYNILEGLEK.L                   |
| Hs293FLP-MG_Ti_202.210   | 2.8485 | 0.1502 | 1253.67 | 1254.47 | 6646.3  | 9 | 415.7  | 54.5 | 1 K.DLTGQVPTPVVK.Q                          |
| HsF-IP-293-MG_Ti_102.168 | 3.768  | 0.2506 | 1254.26 | 1254.47 | 4024.1  | 1 | 864    | 81.8 | 2 K.DLTGQVPTPVVK.Q                          |
| Hs293FLP-MG_Ti_202.210   | 4.0403 | 0.1835 | 1254.46 | 1254.47 | 3762.9  | 1 | 693.5  | 77.3 | 2 K.DLTGQVPTPVVK.Q                          |
| HsFLAG-Control_293_Ti_20 | 2.18   | 0.1697 | 1254.66 | 1254.47 | 7295.5  | 9 | 459.4  | 54.5 | 1 K.DLTGQVPTPVVK.Q                          |
| Hs293FLP_Ti_302.1728.17  | 3.74   | 0.3025 | 1255.47 | 1254.47 | 3770.5  | 7 | 582    | 72.7 | 1 K.DLTGQVPTPVVK.Q                          |
| Hs293FLP_TREX_Ti_106.2   | 3.2972 | 0.2917 | 1366.47 | 1366.64 | 3827.9  | 2 | 412.2  | 62.5 | 2 R.ESLKPAAKPLPSK.S                         |
| HsHeLa_Control-MG_Ti_20  | 2.5746 | 0.2498 | 909.25  | 909.117 | 7902.6  | 1 | 919.2  | 81.2 | 1 K.PAAKPLPSK.S                             |
| HsHeLa_Control-MG_Ti_20  | 3.2545 | 0.3064 | 1490.61 | 1491.73 | 3327.7  | 1 | 366.3  | 66.7 | 3 K.VNHVEKPPKVESK.E                         |
| Hs293FLP_Ti_306.2087.20  | 2.8338 | 0.2662 | 1490.81 | 1491.73 | 4430.9  | 2 | 341.8  | 58.3 | 1 K.VNHVEKPPKVESK.E                         |
| HsHeLa_Control-MG_Ti_20  | 3.6274 | 0.1524 | 1491.54 | 1491.73 | 6653.4  | 2 | 828.2  | 70.8 | 2 K.VNHVEKPPKVESK.E                         |
| HsF-IP-293-MG_Ti_106.178 | 3.1272 | 0.2627 | 1491.68 | 1491.73 | 8463.5  | 5 | 585.9  | 54.2 | 3 K.VNHVEKPPKVESK.E                         |
| Hs293FLP-MG_Ti_203.129   | 2.6916 | 0.1887 | 1325.58 | 1326.49 | 3042    | 1 | 288.3  | 63.6 | 1 K.EVPSKEEPSVK.A                           |
| Hs293FLP-MG_Ti_203.129   | 2.6528 | 0.1342 | 1328.05 | 1326.49 | 4416.2  | 3 | 471    | 68.2 | 1 K.EVPSKEEPSVK.A                           |
| Hs293FLP-MG_Ti_203.146   | 2.934  | 0.2135 | 1953.74 | 1954.19 | 6375.6  | 5 | 428.2  | 50   | 1 K.EVPSKEEPSVKAEVAEK.Q                     |
| HsHeLa_Control-MG_Ti_20  | 2.8021 | 0.0894 | 854.01  | 853.096 | 3937.8  | 2 | 612.4  | 92.9 | 1 K.KPAALKPK.V                              |
| Hs293FLP-MG_Ti_203.463   | 5.5887 | 0.4507 | 2625.07 | 2626.04 | 10243   | 1 | 2409.9 | 48.3 | 2 K.AAEAVAAVGTGATTAAVMAAAGIAAIGPAK.E        |
| Hs293FLP-MG_Ti_204.435   | 4.8395 | 0.3771 | 2626.21 | 2626.04 | 10003.7 | 1 | 1484.9 | 31.7 | 1 K.AAEAVAAVGTGATTAAVMAAAGIAAIGPAK.E        |
| HsHeLa_Control-MG_Ti_20  | 5.2217 | 0.3419 | 1653.38 | 1652.8  | 7146.2  | 1 | 1959.7 | 84.6 | 10 K.DFEELKAEVDVTK.D                        |
| HsHeLa_Control-MG_Ti_20  | 3.079  | 0.2328 | 1699.34 | 1699.9  | 3754.1  | 1 | 505.4  | 69.2 | 1 K.DIKPQLELIEDEEK.L                        |
| HsHeLa_Control-MG_Ti_20  | 3.6628 | 0.1883 | 1940.77 | 1941.23 | 5160.9  | 1 | 845    | 46.7 | 1 K.DIKPQLELIEDEEKLK.E                      |
| Hs293FLP-MG_Ti_203.258   | 4.176  | 0.2461 | 1941.43 | 1941.23 | 5727    | 2 | 709.6  | 43.3 | 2 K.DIKPQLELIEDEEKLK.E                      |
| Hs293FLP-MG_Ti_203.257   | 4.4982 | 0.3744 | 1941.68 | 1941.23 | 5397.5  | 1 | 988.5  | 70   | 2 K.DIKPQLELIEDEEKLK.E                      |
| HsHeLa_Control-MG_Ti_20  | 3.295  | 0.1517 | 1942.35 | 1941.23 | 7154.3  | 1 | 988.9  | 66.7 | 2 K.DIKPQLELIEDEEKLK.E                      |
| HsHeLa_Control-MG_Ti_20  | 4.6306 | 0.3585 | 3327.38 | 3328.78 | 6204.8  | 1 | 1002.6 | 31.5 | 5 K.DIKPQLELIEDEEKLKETEPVEAYVIQK.E          |
| HsF-IP-293-MG_Ti_104.167 | 3.8506 | 0.3068 | 1647.39 | 1647.91 | 4259    | 1 | 1041.2 | 80.8 | 3 K.LKETEPVEAYVIQK.E                        |
| HsF-IP-293-MG_Ti_102.17  | 3.5296 | 0.4119 | 1405.74 | 1406.58 | 5875.1  | 1 | 1082.9 | 81.8 | 2 K.ETEPVEAYVIQK.E                          |
| Hs293FLP-MG_Ti_202.221   | 5.7341 | 0.4013 | 3346.71 | 3346.41 | 8442.8  | 1 | 1501.5 | 31.7 | 2 K.GPAESPDEGITTTEGECEQTPEELEPVEK.Q         |
| Hs293FLP-MG_Ti_202.292   | 3.3729 | 0.3168 | 3139.91 | 3141.15 | 7229.9  | 1 | 491.7  | 35.2 | 1 K.QGVDDIEKFEDEGAGFEESSETGDYEEK.A          |
| Hs293FLP-MG_Ti_202.291   | 5.7993 | 0.4486 | 3140.76 | 3141.15 | 9199.3  | 1 | 935.1  | 27.8 | 2 K.QGVDDIEKFEDEGAGFEESSETGDYEEK.A          |
| Hs293FLP_Ti_302.1440.14  | 4.5337 | 0.365  | 2563.38 | 2562.54 | 3838.5  | 1 | 629.4  | 47.7 | 1 K.AETEEAEEPEEDGEEHVCSASK.H                |
| HsF-IP-293-MG_Ti_106.208 | 4.722  | 0.4651 | 2120.34 | 2120.19 | 8811.5  | 1 | 2259.8 | 72.2 | 4 K.HSPTEDEESAKAEADAYIR.E                   |
| HsF-IP-293-MG_Ti_102.183 | 5.8851 | 0.3014 | 1943.22 | 1942.09 | 10288.5 | 1 | 2354   | 63.9 | 13 K.AAEAGGAEQYGFLLTPTK.Q                   |
| Hs293FLP-MG_Ti_202.276   | 3.5989 | 0.2187 | 2743.44 | 2744.85 | 10028   | 1 | 1087.7 | 30.4 | 1 R.DVMSDETNNETESPSQEFVNITK.Y               |
| Hs293FLP-MG_Ti_202.274   | 3.8077 | 0.2961 | 2744.39 | 2744.85 | 6520.2  | 1 | 500.6  | 39.1 | 2 R.DVMSDETNNETESPSQEFVNITK.Y               |
| Hs293FLP-MG_Ti_202.268   | 2.986  | 0.1182 | 2985.82 | 2985.19 | 7733.8  | 1 | 599    | 36.5 | 1 K.YESSLSQEYSKPADVTPLNGFSEGSK.T            |
| Hs293FLP-MG_Ti_203.229   | 4.9505 | 0.3241 | 3673.02 | 3673.88 | 10812.6 | 1 | 789.5  | 22.7 | 2 K.YESSLSQEYSKPADVTPLNGFSEGSKTDATDGK.D     |
| Hs293FLP_TREX_Ti_102.1   | 1.9175 | 0.1887 | 1022.32 | 1023.09 | 5618.7  | 1 | 564.5  | 72.2 | 1 K.DSISAVSSEK.V                            |

|                          |        |        |         |         |         |   |        |      |                                       |
|--------------------------|--------|--------|---------|---------|---------|---|--------|------|---------------------------------------|
| HsF-IP-293-MG_Ti_102.084 | 2.5174 | 0.1978 | 1023.15 | 1023.09 | 5482.3  | 2 | 746.8  | 77.8 | 1 K.DSISAVSSEK.V                      |
| Hs293FLP-MG_Ti_204.176   | 1.8427 | 0.3414 | 1422.48 | 1423.61 | 7080.3  | 1 | 712.3  | 57.7 | 1 K.SPSPSPSPSPLEK.T                   |
| HsF-IP-293-MG_Ti_104.154 | 3.7303 | 0.263  | 1423.54 | 1423.61 | 4139.4  | 1 | 493.8  | 61.5 | 4 K.SPSPSPSPSPLEK.T                   |
| Hs293FLP_TREX_Ti_102.1   | 3.4788 | 0.1807 | 1349.18 | 1349.53 | 6035.6  | 1 | 760.2  | 68.2 | 11 R.SVNFSLTPNEIK.V                   |
| Hs293FLP-MG_Ti_202.241   | 3.5683 | 0.39   | 3124.34 | 3124.31 | 9301.5  | 1 | 514.9  | 32.1 | 4 K.VSAEAEVAPVSPEVTQEVVEEHCASPEDK.T   |
| HsFLAG-Control_293_Ti_20 | 3.495  | 0.3285 | 2966.2  | 2967.17 | 6914.5  | 1 | 527.7  | 33.3 | 2 K.TLEVVSQSVTGSAGHTPPYQSPTDEK.S      |
| HsHeLa_Control-MG_Ti_20  | 4.4453 | 0.3273 | 2712.06 | 2713.06 | 5024.1  | 1 | 829.1  | 34.4 | 2 K.SSHLPTEVIEKPPAVPVSFESDAK.D        |
| Hs293FLP-MG_Ti_205.267   | 4.3935 | 0.2291 | 2712.17 | 2713.06 | 5795.1  | 1 | 1076.6 | 36.5 | 2 K.SSHLPTEVIEKPPAVPVSFESDAK.D        |
| Hs293FLP-MG_Ti_205.269   | 4.515  | 0.4085 | 2712.59 | 2713.06 | 5512.5  | 1 | 725.6  | 43.8 | 1 K.SSHLPTEVIEKPPAVPVSFESDAK.D        |
| HsHeLa_Control-MG_Ti_20  | 6.0498 | 0.4476 | 3356.64 | 3356.67 | 5200.7  | 1 | 1121.7 | 36.2 | 11 K.SSHLPTEVIEKPPAVPVSFESDAKDNENER.A |
| HsHeLa_Control-MG_Ti_20  | 3.3428 | 0.2968 | 2136.83 | 2135.3  | 10066.9 | 1 | 913.5  | 50   | 1 K.PPAVPVSFEFSDAKDNENER.A            |
| Hs293FLP-MG_Ti_202.213   | 3.8772 | 0.2858 | 2014.56 | 2015.2  | 5451.6  | 1 | 694    | 55.6 | 9 R.ASVSPMDEPVPDESPIEK.V              |
| Hs293FLP-MG_Ti_205.324   | 5.394  | 0.4147 | 2779.37 | 2780.1  | 8648.2  | 1 | 1451.3 | 32   | 2 K.VLSPLRSPPLIGSESAYESFLSADDK.A      |
| Hs293FLP-MG_Ti_202.331   | 5.847  | 0.549  | 2113.64 | 2114.27 | 7020.9  | 1 | 2692   | 78.9 | 10 R.SPPLIGSESAYESFLSADDK.A           |
| HsHeLa_Control-MG_Ti_20  | 2.1642 | 0.1037 | 993.43  | 994.046 | 4636.2  | 5 | 449.2  | 62.5 | 1 R.GAESPFEEK.S                       |
| Hs293FLP-MG_Ti_202.252   | 4.1864 | 0.4797 | 2385.22 | 2385.56 | 6708.1  | 1 | 810.4  | 50   | 7 K.QGSPDQVSPVSEMTSTSLYQDK.Q          |
| Hs293FLP_TREX_Ti_103.1   | 4.0883 | 0.4085 | 1712.5  | 1712.85 | 4292.2  | 1 | 660    | 67.9 | 15 K.STDFAPIKEDFGQEK.K                |
| HsF-IP-293-MG_Ti_104.175 | 4.5971 | 0.5103 | 2076.43 | 2077.27 | 8146.4  | 1 | 1740.9 | 66.7 | 5 K.KTDDVEAMSSQPALALDER.K             |
| Hs293FLP-MG_Ti_203.278   | 5.7718 | 0.3943 | 2054.19 | 2054.31 | 7791.5  | 1 | 2175.7 | 69.4 | 1 R.KLGDVSPQTQIDVQFGSFK.E             |
| Hs293FLP-MG_Ti_204.246   | 3.8277 | 0.2788 | 2527.32 | 2527.79 | 8643.1  | 1 | 813.5  | 45.5 | 2 R.KLGDVSPQTQIDVQFGSFKEDTK.M         |
| Hs293FLP-MG_Ti_202.314   | 4.1151 | 0.3444 | 1925.55 | 1926.13 | 5325    | 1 | 938.7  | 58.8 | 2 K.LGDVSPQTQIDVQFGSFK.E              |
| Hs293FLP-MG_Ti_102.157   | 2.0067 | 0.1397 | 1153.66 | 1154.28 | 5215.5  | 1 | 434.9  | 65   | 1 K.MSISEGTVSDK.S                     |
| Hs293FLP-MG_Ti_202.357   | 3.9324 | 0.3685 | 2808.41 | 2809.01 | 9101.1  | 1 | 769.5  | 37.5 | 2 R.SEQSSMSIEFGQESPEQSLAMDFSR.Q       |
| Hs293FLP_TREX_Ti_102.1   | 3.6887 | 0.3266 | 1905.24 | 1904.04 | 4150.9  | 1 | 350    | 44.1 | 10 R.ESSPLYSPTFSDSTSAVK.E             |
| Hs293FLP_TREX_Ti_104.1   | 5.2703 | 0.4954 | 2409.58 | 2410.53 | 5646.5  | 1 | 1475.6 | 61.4 | 7 K.TATCHSSSSPPIDAASAEPYGF.R.A        |
| Hs293FLP-MG_Ti_204.188   | 4.8385 | 0.3866 | 2409.73 | 2410.53 | 5968.4  | 1 | 1099.7 | 54.5 | 10 K.TATCHSSSSPPIDAASAEPYGF.R.A       |
| Hs293FLP_Ti_303.1701.17  | 4.977  | 0.4275 | 2410.18 | 2410.53 | 5199.3  | 1 | 1348.1 | 61.4 | 2 K.TATCHSSSSPPIDAASAEPYGF.R.A        |
| Hs293FLP_TREX_Ti_104.1   | 4.3066 | 0.2017 | 2410.46 | 2410.53 | 7284.9  | 1 | 1500.9 | 38.6 | 2 K.TATCHSSSSPPIDAASAEPYGF.R.A        |
| Hs293FLP_Ti_303.1699.16  | 3.74   | 0.1558 | 2410.64 | 2410.53 | 6842.4  | 3 | 778.5  | 31.8 | 1 K.TATCHSSSSPPIDAASAEPYGF.R.A        |
| Hs293FLP-MG_Ti_206.293   | 4.9721 | 0.4186 | 1853.68 | 1854.14 | 10806.3 | 1 | 2606.2 | 73.3 | 4 R.ASVLFDTMQHHLALNR.D                |
| Hs293FLP_TREX_Ti_103.1   | 4.7163 | 0.4524 | 1989.84 | 1991.12 | 7510.4  | 1 | 748.7  | 56.2 | 11 K.TPGDFSYAYQKPEETTR.S              |
| Hs293FLP-MG_Ti_203.176   | 3.7782 | 0.2819 | 1991.75 | 1991.12 | 5230.6  | 1 | 814.8  | 42.2 | 1 K.TPGDFSYAYQKPEETTR.S               |
| HsF-IP-293-MG_Ti_106.213 | 5.2283 | 0.3815 | 3740.92 | 3741.82 | 11204.4 | 1 | 1177.7 | 25.8 | 5 K.TPGDFSYAYQKPEETTRSPDEEDYDYESYEK.T |
| HsHeLa_Control-MG_Ti_20  | 5.1508 | 0.3791 | 1769.05 | 1769.73 | 7525.3  | 1 | 2038.4 | 80.8 | 5 R.SPDEEDYDYESYEK.T                  |
| Hs293FLP-MG_Ti_102.165   | 2.4642 | 0.3355 | 1281.57 | 1282.35 | 4644.9  | 1 | 396    | 60   | 2 R.TSDVGGYYEYK.I                     |
| HsF-IP-293-MG_Ti_102.149 | 3.4849 | 0.3758 | 1282.27 | 1282.35 | 3888.6  | 1 | 903.4  | 85   | 3 R.TSDVGGYYEYK.I                     |
| Hs293FLP-MG_Ti_102.165   | 3.0866 | 0.2944 | 1282.6  | 1282.35 | 3923.4  | 2 | 780.3  | 85   | 2 R.TSDVGGYYEYK.I                     |
| Hs293FLP-MG_Ti_204.182   | 2.9952 | 0.1974 | 2010.57 | 2011.2  | 7122    | 6 | 421.8  | 46.9 | 1 R.TSDVGGYYEYKIERTTK.S               |
| Hs293FLP_TREX_Ti_102.1   | 2.7389 | 0.3828 | 1490.28 | 1491.55 | 6667.5  | 1 | 654.8  | 57.7 | 1 K.SPDSGYSYETIGK.T                   |
| Hs293FLP-MG_Ti_202.189   | 2.8984 | 0.379  | 1490.54 | 1491.55 | 8672.3  | 1 | 600.4  | 53.8 | 1 K.SPDSGYSYETIGK.T                   |
| Hs293FLP-MG_Ti_202.190   | 3.6735 | 0.336  | 1491.25 | 1491.55 | 7784.1  | 1 | 1273.3 | 69.2 | 3 K.SPDSGYSYETIGK.T                   |
| HsHeLa_Control-MG_Ti_20  | 4.5721 | 0.4448 | 1491.45 | 1491.55 | 7917.8  | 1 | 1946.1 | 80.8 | 3 K.SPDSGYSYETIGK.T                   |
| HsF-IP-293-MG_Ti_102.154 | 3.9816 | 0.4209 | 1491.48 | 1491.55 | 6657.4  | 1 | 1501.8 | 76.9 | 2 K.SPDSGYSYETIGK.T                   |
| Hs293FLP_TREX_Ti_102.1   | 4.7213 | 0.3532 | 1659.26 | 1659.74 | 7644.7  | 1 | 2486.7 | 84.6 | 13 K.TPEDGDYSYEIIEK.T                 |
| HsHeLa_Control-MG_Ti_20  | 4.6301 | 0.2919 | 1575.33 | 1575.63 | 6294    | 1 | 1716.5 | 84.6 | 17 R.TPEEGGYSYDISEK.T                 |
| Hs293FLP_TREX_Ti_102.1   | 2.5508 | 0.3188 | 1544.36 | 1545.64 | 4845.3  | 1 | 645.3  | 65.4 | 1 K.TTSPPEVSGYSYEK.T                  |
| HsHeLa_Control-MG_Ti_20  | 3.7031 | 0.3492 | 1545.28 | 1545.64 | 4208.9  | 1 | 549.7  | 69.2 | 2 K.TTSPPEVSGYSYEK.T                  |
| Hs293FLP_TREX_Ti_102.1   | 3.0066 | 0.3474 | 1545.42 | 1545.64 | 4103.1  | 1 | 480.9  | 65.4 | 2 K.TTSPPEVSGYSYEK.T                  |
| Hs293FLP-MG_Ti_202.186   | 2.7061 | 0.3209 | 1545.44 | 1545.64 | 5787.4  | 1 | 408.1  | 50   | 4 K.TTSPPEVSGYSYEK.T                  |

|                    |                          |        |        |         |         |         |       |                                                            |      |    |                                                                      |
|--------------------|--------------------------|--------|--------|---------|---------|---------|-------|------------------------------------------------------------|------|----|----------------------------------------------------------------------|
|                    | HsHeLa_Control-MG_Ti_20  | 5.6851 | 0.4174 | 3551.2  | 3551.63 | 6920.6  | 1     | 679.7                                                      | 25.8 | 2  | R.RLLDDISNGYDSEDDGGHTLGDPSYSYETTEK.I                                 |
|                    | HsF-IP-293-MG_Ti_105.189 | 4.7621 | 0.4589 | 3395.85 | 3395.44 | 6514.5  | 1     | 823.3                                                      | 27.5 | 7  | R.LLDDISNGYDSEDDGGHTLGDPSYSYETTEK.I                                  |
|                    | Hs293FLP_TREX_Ti_102.1   | 4.3764 | 0.4478 | 1926.33 | 1927.03 | 4555.6  | 1     | 1014.3                                                     | 71.9 | 16 | K.ITSFPESEGYSYETSTK.T                                                |
|                    | Hs293FLP-MG_Ti_203.153   | 3.3669 | 0.1597 | 2024.93 | 2025.1  | 9076.3  | 2     | 633.5                                                      | 50   | 1  | K.TTRTPDTSTYCYETAEK.I                                                |
|                    | HsF-IP-293-MG_Ti_102.14  | 3.9483 | 0.4698 | 1666.43 | 1666.7  | 6574.9  | 1     | 1694.9                                                     | 80.8 | 3  | R.TPDTSTYCYETAEK.I                                                   |
|                    | HsF-IP-293-MG_Ti_102.17  | 4.9361 | 0.4454 | 2316.48 | 2316.4  | 5976.4  | 1     | 1354.5                                                     | 60.5 | 11 | R.TPQASTYSYETS DLCYTAEK.K                                            |
|                    | Hs293FLP-MG_Ti_203.184   | 4.2093 | 0.407  | 2443.09 | 2444.58 | 10320.5 | 1     | 858.3                                                      | 40   | 2  | R.TPQASTYSYETS DLCYTAEKK.S                                           |
|                    | HsF-IP-293-MG_Ti_105.15  | 4.8901 | 0.4566 | 2445.19 | 2444.58 | 7525.2  | 1     | 919.1                                                      | 36.2 | 1  | R.TPQASTYSYETS DLCYTAEKK.S                                           |
|                    | Hs293FLP-MG_Ti_203.227   | 3.5932 | 0.3836 | 1716.22 | 1716.82 | 8488.2  | 1     | 1280                                                       | 69.2 | 1  | R.QDVDLCLVSSCEYK.H                                                   |
|                    | Hs293FLP-MG_Ti_202.466   | 2.6954 | 0.2596 | 3107.78 | 3109.33 | 9301.4  | 1     | 441.3                                                      | 28.8 | 1  | K.TELSPSFINPNLEWFASEEPTSEK.P<br>K.TELSPSFINPNLEWFASEEPTSEKPLTQSGGAPP |
|                    | Hs293FLP-MG_Ti_203.413   | 5.5844 | 0.4315 | 4450.21 | 4451.84 | 7054    | 1     | 724.6                                                      | 21.3 | 8  | PPGGK.Q                                                              |
|                    | Hs293FLP_TREX_Ti_105.1   | 3.8535 | 0.3753 | 1361.31 | 1361.54 | 4427.3  | 1     | 840.6                                                      | 71.4 | 3  | K.PLQSGGAPPPGGK.Q                                                    |
|                    | HsHeLa_Control-MG_Ti_20  | 2.0067 | 0.0984 | 898.47  | 899.078 | 3837.7  | 2     | 363.3                                                      | 75   | 1  | K.SKPLAASPK.P                                                        |
|                    | HsHeLa_Control-MG_Ti_20  | 2.5809 | 0.3154 | 1364.56 | 1365.66 | 3800.9  | 1     | 301.9                                                      | 53.8 | 2  | K.SKPLAASPKPAGLK.E                                                   |
|                    | Hs293FLP_TREX_Ti_106.2   | 3.0003 | 0.3193 | 1365.57 | 1365.66 | 5166.3  | 1     | 575.4                                                      | 61.5 | 2  | K.SKPLAASPKPAGLK.E                                                   |
|                    | HsHeLa_Control-MG_Ti_20  | 2.6033 | 0.3402 | 1142.9  | 1143.33 | 2834.4  | 1     | 366.9                                                      | 70   | 1  | K.AAKPTTTPEVK.A                                                      |
|                    | HsHeLa_Control-MG_Ti_20  | 3.748  | 0.3775 | 2628.67 | 2629.94 | 3952.9  | 1     | 263.6                                                      | 39.1 | 5  | K.SSAVPPGLPVYLDLCYIPNHSNSK.N                                         |
|                    | HsHeLa_Control-MG_Ti_20  | 2.7448 | 0.2087 | 997.4   | 998.123 | 3870.1  | 7     | 426.9                                                      | 78.6 | 4  | K.NVDVEFFK.R                                                         |
|                    | HsFLAG-Control_293_Ti_2( | 5.5766 | 0.4756 | 1928.51 | 1929.01 | 7628.4  | 1     | 1703.4                                                     | 64.7 | 12 | R.SSYYVVGNDPAAEEPSR.A                                                |
|                    | Hs293FLP-MG_Ti_203.370   | 3.754  | 0.2574 | 2940.38 | 2939.21 | 6067    | 1     | 515.3                                                      | 25   | 1  | R.SSYYVVGNDPAAEEPSRAVL DALLEGK.A                                     |
|                    | Hs293FLP-MG_Ti_202.296   | 3.7575 | 0.1962 | 1028.41 | 1029.22 | 3886.9  | 1     | 1049                                                       | 88.9 | 5  | R.AVLDALLEGK.A                                                       |
|                    | Hs293FLP-MG_Ti_202.298   | 2.4687 | 0.2016 | 1028.5  | 1029.22 | 10995   | 1     | 852.2                                                      | 66.7 | 2  | R.AVLDALLEGK.A                                                       |
|                    | HsHeLa_Control-MG_Ti_20  | 2.2589 | 0.1799 | 1028.6  | 1029.22 | 3518.2  | 3     | 411.9                                                      | 66.7 | 1  | R.AVLDALLEGK.A                                                       |
|                    | HsF-IP-293-MG_Ti_102.22  | 3.7058 | 0.2483 | 1029.29 | 1029.22 | 3671.5  | 1     | 979.6                                                      | 88.9 | 4  | R.AVLDALLEGK.A                                                       |
|                    | HsHeLa_Control-MG_Ti_20  | 3.7959 | 0.1662 | 1029.34 | 1029.22 | 4447.9  | 1     | 924.2                                                      | 83.3 | 8  | R.AVLDALLEGK.A                                                       |
|                    | Hs293FLP_Ti_302.2467.24  | 2.5858 | 0.1814 | 1030.04 | 1029.22 | 8634.6  | 7     | 826.8                                                      | 66.7 | 3  | R.AVLDALLEGK.A                                                       |
| gij4503545 ref NF  |                          | 6      | 16     | 0.506   | 154     | 16832   | 5.2 U | eukaryotic translation initiation factor 5A [Homo sapiens] |      |    |                                                                      |
|                    | HsHeLa_Control_Ti_106.33 | 3.471  | 0.3788 | 1298.82 | 1299.56 | 6719.6  | 1     | 1188.7                                                     | 72.7 | 1  | K.VHLVGIDIFTGK.K                                                     |
|                    | HsHeLa_Control-MG_Ti_20  | 3.616  | 0.2903 | 1299.28 | 1299.56 | 5463.8  | 1     | 1286.8                                                     | 81.8 | 4  | K.VHLVGIDIFTGK.K                                                     |
|                    | HsGST-MOCK_Ti_304.193    | 2.8938 | 0.3003 | 2160.75 | 2162.39 | 8537.7  | 1     | 736.8                                                      | 50   | 1  | K.KYEDICPSTHNMDVPMK.R                                                |
| *                  | HsHeLa_Control-MG_Ti_20  | 5.8242 | 0.44   | 2739.29 | 2738.03 | 10171.3 | 1     | 2137                                                       | 38   | 1  | K.RNDFQLIGIQDGYLSLLQDSGEVR.E                                         |
| *                  | HsFLAG-Control_HeLa_NE   | 4.4789 | 0.3178 | 2580.7  | 2581.84 | 8733.2  | 1     | 1390.7                                                     | 50   | 3  | R.NDFQLIGIQDGYLSLLQDSGEVR.E                                          |
|                    | HsGST-MOCK_Ti_306.049    | 5.0622 | 0.4083 | 2627.07 | 2627.97 | 9107.5  | 1     | 1264.5                                                     | 47.8 | 6  | K.YDCGEEILITVLSAMTEEAVAIK.A                                          |
| gij5032161 ref NF  |                          | 5      | 14     | 0.5     | 112     | 12473   | 4.8 U | elongin C [Homo sapiens]                                   |      |    |                                                                      |
| *                  | Hs293FLP-MG_Ti_302.144   | 4.0127 | 0.3926 | 1549.33 | 1548.67 | 5498.3  | 1     | 1881.6                                                     | 88.5 | 2  | K.TYGGCEGPDAMYVK.L                                                   |
|                    | Hs293FLP-MG_Ti_306.238   | 2.748  | 0.0986 | 1344.52 | 1345.54 | 4997.1  | 6     | 461.5                                                      | 59.1 | 1  | K.LISSDGHEFIVK.R                                                     |
|                    | Hs293FLP-MG_Ti_306.238   | 3.7505 | 0.2283 | 1346.65 | 1345.54 | 4658.4  | 1     | 1040.7                                                     | 86.4 | 3  | K.LISSDGHEFIVK.R                                                     |
|                    | Hs293FLP-MG_Ti_303.119   | 2.8484 | 0.3758 | 1057.4  | 1057.19 | 3442.6  | 1     | 286.7                                                      | 72.2 | 6  | R.EHALTSGTIK.A                                                       |
| *                  | Hs293FLP-MG_Ti_304.202   | 2.6788 | 0.1928 | 2211.65 | 2212.4  | 8966.2  | 1     | 558.9                                                      | 42.1 | 2  | K.AMLSGPGQFAENETNEVNFR.E                                             |
| gij47604944 ref NF |                          | 72     | 366    | 0.498   | 929     | 103709  | 8.2 U | SCY1-like 2 protein [Homo sapiens]                         |      |    |                                                                      |
| *                  | HsFLAG-Control_293_Ti_2( | 4.9069 | 0.3367 | 1620.5  | 1618.85 | 7829    | 1     | 1626.2                                                     | 70   | 5  | K.VTADVTSAVMGNPVTR.E                                                 |
| *                  | HsFLAG-Control_293_Ti_1( | 2.2989 | 0.2942 | 1209.33 | 1211.37 | 5203    | 1     | 451.6                                                      | 63.6 | 2  | R.HIASGGNGLAWK.I                                                     |
| *                  | HsFLAG-Control_293_Ti_1( | 2.9682 | 0.3056 | 1210.14 | 1211.37 | 3256.3  | 1     | 491.6                                                      | 77.3 | 1  | R.HIASGGNGLAWK.I                                                     |
| *                  | HsFLAG-Control_MG_293_   | 2.9148 | 0.3301 | 1210.41 | 1211.37 | 5788.6  | 1     | 596.9                                                      | 63.6 | 2  | R.HIASGGNGLAWK.I                                                     |
| *                  | HsFLAG-Control_293_Ti_2( | 2.6718 | 0.2917 | 1210.56 | 1211.37 | 6059.4  | 1     | 529.1                                                      | 59.1 | 2  | R.HIASGGNGLAWK.I                                                     |
| *                  | HsFLAG-Control_MG_293_   | 3.9553 | 0.3135 | 1211.21 | 1211.37 | 3408.1  | 1     | 768.8                                                      | 86.4 | 2  | R.HIASGGNGLAWK.I                                                     |
| *                  | HsFLAG-Control_293_Ti_2( | 3.9323 | 0.3689 | 1211.23 | 1211.37 | 3362.3  | 1     | 870.6                                                      | 90.9 | 2  | R.HIASGGNGLAWK.I                                                     |
| *                  | HsFLAG-Control_293_Ti_2( | 3.1781 | 0.2539 | 1181.51 | 1182.36 | 2547.4  | 1     | 296.3                                                      | 77.8 | 6  | K.QEVAVFVFDK.K                                                       |

|   |                          |        |        |         |         |         |   |        |      |    |                                      |
|---|--------------------------|--------|--------|---------|---------|---------|---|--------|------|----|--------------------------------------|
| * | HsFLAG-Control_MG_293_   | 2.7212 | 0.2046 | 1184.31 | 1182.36 | 5132.5  | 2 | 542.7  | 77.8 | 1  | K.QEVAVFVFDK.K                       |
| * | HsFLAG-Control_293_Ti_1( | 2.9327 | 0.0983 | 958.61  | 958.109 | 7246.6  | 1 | 1163.8 | 100  | 3  | K.RGVQQLTR.L                         |
| * | HsFLAG-Control_293_Ti_2( | 3.0473 | 0.2505 | 1421.62 | 1422.62 | 5246.1  | 1 | 389.7  | 59.1 | 1  | R.LLTVQHPLEESR.D                     |
| * | HsFLAG-Control_MG_293_   | 2.8435 | 0.2088 | 1421.69 | 1422.62 | 7139.4  | 1 | 458.7  | 54.5 | 1  | R.LLTVQHPLEESR.D                     |
| * | HsFLAG-Control_293_Ti_1( | 3.214  | 0.1093 | 1421.91 | 1422.62 | 9295.1  | 1 | 1525.5 | 81.8 | 5  | R.LLTVQHPLEESR.D                     |
| * | HsFLAG-Control_293_Ti_2( | 4.0626 | 0.1563 | 1422.23 | 1422.62 | 6331.3  | 1 | 1099   | 77.3 | 5  | R.LLTVQHPLEESR.D                     |
| * | HsFLAG-Control_293_Ti_1( | 2.5241 | 0.1416 | 1422.4  | 1422.62 | 6276    | 3 | 348.4  | 59.1 | 1  | R.LLTVQHPLEESR.D                     |
| * | HsFLAG-Control_HeLa_S1(  | 3.7144 | 0.1882 | 1422.44 | 1422.62 | 6300.4  | 1 | 1146.4 | 81.8 | 4  | R.LLTVQHPLEESR.D                     |
| * | HsFLAG-Control_MG_293_   | 3.4146 | 0.2872 | 1422.57 | 1422.62 | 5514.9  | 1 | 900.4  | 77.3 | 3  | R.LLTVQHPLEESR.D                     |
| * | HsFLAG-Control_293_Ti_1( | 5.8458 | 0.4206 | 3676.59 | 3677.08 | 5975.4  | 1 | 1494.1 | 35.2 | 17 | R.DCLAFCTEPVFASLANVLGNWENLPSISPDIK.D |
| * | HsFLAG-Control_HeLa_S1(  | 4.9234 | 0.4197 | 1964.43 | 1965.26 | 7453.7  | 1 | 1580.3 | 67.6 | 3  | K.YGLLQVSEGLSFLHSSVK.M               |
| * | Hs293FLP-MG_Ti_205.343   | 5.1611 | 0.4239 | 1964.48 | 1965.26 | 8186.3  | 1 | 2133   | 70.6 | 2  | K.YGLLQVSEGLSFLHSSVK.M               |
| * | HsFLAG-Control_HeLa_S1(  | 4.6333 | 0.4082 | 1964.53 | 1965.26 | 7103.2  | 1 | 1216.6 | 61.8 | 4  | K.YGLLQVSEGLSFLHSSVK.M               |
| * | HsFLAG-Control_HeLa_S1(  | 5.029  | 0.3389 | 1964.77 | 1965.26 | 6120.7  | 1 | 1737.6 | 47.1 | 2  | K.YGLLQVSEGLSFLHSSVK.M               |
| * | HsFLAG-Control_HeLa_NE   | 4.4733 | 0.3584 | 1964.96 | 1965.26 | 6146.9  | 1 | 1011.3 | 61.8 | 5  | K.YGLLQVSEGLSFLHSSVK.M               |
| * | HsFLAG-Control_293_Ti_1( | 5.0528 | 0.3764 | 1965.16 | 1965.26 | 7206.8  | 1 | 1887.8 | 70.6 | 7  | K.YGLLQVSEGLSFLHSSVK.M               |
| * | Hs293FLP-MG_Ti_205.342   | 4.9663 | 0.3401 | 1965.23 | 1965.26 | 7982.1  | 1 | 2011.8 | 48.5 | 2  | K.YGLLQVSEGLSFLHSSVK.M               |
| * | HsFLAG-Control_293_Ti_1( | 4.5834 | 0.2898 | 1965.43 | 1965.26 | 7490.8  | 1 | 1840   | 47.1 | 2  | K.YGLLQVSEGLSFLHSSVK.M               |
| * | HsFLAG-Control_HeLa_S1(  | 4.3734 | 0.323  | 1965.66 | 1965.26 | 6463.9  | 1 | 1626.2 | 47.1 | 1  | K.YGLLQVSEGLSFLHSSVK.M               |
| * | HsFLAG-Control_HeLa_NE   | 4.6112 | 0.3219 | 1966.24 | 1965.26 | 5968.5  | 1 | 2433.7 | 54.4 | 2  | K.YGLLQVSEGLSFLHSSVK.M               |
| * | HsFLAG-Control_MG_293_   | 3.7807 | 0.2918 | 1693.41 | 1694    | 7215.5  | 1 | 984    | 64.3 | 2  | K.MVHGNITPENIILNK.S                  |
| * | HsFLAG-Control_293_Ti_2( | 5.0947 | 0.4652 | 2173.06 | 2174.35 | 7482.1  | 1 | 1297.8 | 61.1 | 7  | K.IMGFDFCVSSTNPSEQEPK.F              |
| * | HsFLAG-Control_MG_293_   | 2.773  | 0.1036 | 1031.65 | 1032.23 | 2950.1  | 1 | 430.3  | 87.5 | 2  | K.GKPIFEVVK.Q                        |
| * | HsFLAG-Control_HeLa_S1(  | 3.571  | 0.4378 | 1679.41 | 1679.96 | 4900.3  | 1 | 572.5  | 65.4 | 4  | K.GKPIFEVVKQDIYK.S                   |
| * | HsFLAG-Control_293_Ti_1( | 3.0123 | 0.3486 | 1501.72 | 1502.67 | 4416.6  | 1 | 382.6  | 57.7 | 2  | R.LGSSSLTNIPEEVR.E                   |
| * | HsFLAG-Control_MG_293_   | 4.3809 | 0.2803 | 1502.53 | 1502.67 | 5739.3  | 1 | 932.2  | 69.2 | 2  | R.LGSSSLTNIPEEVR.E                   |
| * | Hs293FLP-MG_Ti_202.230   | 4.1022 | 0.2556 | 1502.55 | 1502.67 | 4951.3  | 2 | 621.9  | 61.5 | 11 | R.LGSSSLTNIPEEVR.E                   |
| * | HsFLAG-Control_MG_293_   | 2.8066 | 0.2249 | 1502.6  | 1502.67 | 5294.7  | 5 | 205.7  | 42.3 | 1  | R.LGSSSLTNIPEEVR.E                   |
| * | HsFLAG-Control_HeLa_S1(  | 3.9151 | 0.3262 | 1502.65 | 1502.67 | 4401.9  | 3 | 603.2  | 65.4 | 12 | R.LGSSSLTNIPEEVR.E                   |
| * | HsFlag1P_Ti_106.2564.256 | 3.2467 | 0.3095 | 1995.55 | 1996.23 | 4557.5  | 1 | 391.4  | 47.1 | 1  | R.LGSSSLTNIPEEVR.HVK.L               |
| * | HsFLAG-Control_293_Ti_2( | 4.6159 | 0.3978 | 2013.99 | 2013.36 | 6152.1  | 1 | 998.7  | 61.8 | 6  | K.LLLNVTPTRPDADQMTK.I                |
| * | HsFLAG-Control_HeLa_S1(  | 5.612  | 0.3618 | 2492.6  | 2493.82 | 7203.3  | 1 | 1457.9 | 60   | 62 | K.IPFFDDVGAFTLQYFDTLFQR.D            |
| * | Hs293FLP-MG_Ti_206.033   | 4.0923 | 0.3309 | 2493.66 | 2493.82 | 8317.6  | 1 | 1282.2 | 37.5 | 1  | K.IPFFDDVGAFTLQYFDTLFQR.D            |
| * | HsFLAG-Control_293_Ti_2( | 2.5292 | 0.131  | 1225.62 | 1226.55 | 4627.4  | 1 | 594.6  | 70   | 1  | K.LILPELGPVFK.Q                      |
| * | HsFLAG-Control_HeLa_NE   | 3.2306 | 0.1516 | 1226.24 | 1226.55 | 3497.1  | 2 | 606.8  | 80   | 14 | K.LILPELGPVFK.Q                      |
| * | HsFLAG-Control_293_Ti_2( | 3.0342 | 0.0981 | 1226.37 | 1226.55 | 3747.1  | 2 | 622.9  | 75   | 3  | K.LILPELGPVFK.Q                      |
| * | HsFLAG-Control_293_Ti_1( | 4.0799 | 0.2539 | 1712.65 | 1712.09 | 8347.2  | 1 | 1259.9 | 76.9 | 17 | K.QQEPIQILLIFLQK.M                   |
| * | HsFLAG-Control_293_Ti_2( | 2.2744 | 0.276  | 1078.34 | 1079.3  | 3350.7  | 7 | 184.3  | 68.8 | 1  | K.NSVLPMVYR.A                        |
| * | HsFLAG-Control_293_Ti_1( | 4.0347 | 0.2956 | 1320.62 | 1320.46 | 8134.3  | 1 | 1844.6 | 81.8 | 19 | K.NACLQTSSLAVR.V                     |
| * | HsFLAG-Control_293_Ti_2( | 2.0402 | 0.082  | 989.42  | 990.154 | 8212.4  | 4 | 691.6  | 75   | 1  | R.VNSLVCLGK.I                        |
| * | HsFLAG-Control_MG_293_   | 3.2934 | 0.2019 | 989.72  | 990.154 | 6488.5  | 1 | 1081.1 | 87.5 | 3  | R.VNSLVCLGK.I                        |
| * | HsFLAG-Control_293_Ti_1( | 4.8206 | 0.3504 | 2060.7  | 2060.44 | 4624.2  | 1 | 787.2  | 65.6 | 5  | K.WFVLDLIPFLQQIPSK.E                 |
| * | HsFLAG-Control_293_Ti_2( | 3.5473 | 0.3124 | 1404.44 | 1404.75 | 4644.2  | 1 | 514.6  | 62.5 | 3  | K.EPAVLMGILGIYK.C                    |
| * | HsFLAG-Control_293_Ti_2( | 2.8762 | 0.2868 | 1404.48 | 1404.75 | 6457.7  | 1 | 1008.9 | 75   | 2  | K.EPAVLMGILGIYK.C                    |
| * | HsFLAG-Control_HeLa_S1(  | 4.7458 | 0.1919 | 3081.35 | 3078.63 | 11161.1 | 1 | 1683   | 30.8 | 3  | K.VLPHLIPLSIENNLNLNQFNSFISVIK.E      |
| * | HsFLAG-Control_MG_293_   | 4.7465 | 0.2621 | 1525.45 | 1525.76 | 7681.6  | 1 | 1289.2 | 77.3 | 7  | K.LEQLHIMQEQQK.S                     |
| * | HsFLAG-Control_293_Ti_2( | 4.5077 | 0.3448 | 1697.34 | 1695.9  | 7030.5  | 1 | 1209.5 | 67.9 | 1  | K.SLDIGNQMNVSSEEMK.V                 |
| * | HsFLAG-Control_MG_293_   | 2.9244 | 0.1884 | 1229.29 | 1230.36 | 8814.3  | 3 | 618.1  | 60   | 1  | K.VTNIGNQQIDK.V                      |
| * | HsFLAG-Control_293_Ti_2( | 2.7167 | 0.1805 | 1229.4  | 1230.36 | 6552.5  | 9 | 427.9  | 60   | 1  | K.VTNIGNQQIDK.V                      |

|                   |                          |        |        |         |         |        |     |        |      |    |                                                |
|-------------------|--------------------------|--------|--------|---------|---------|--------|-----|--------|------|----|------------------------------------------------|
| *                 | HsFLAG-Control_293_Ti_1( | 2.7929 | 0.1144 | 1229.53 | 1230.36 | 6635.7 | 9   | 416.4  | 60   | 1  | K.VTNIGNQQIDK.V                                |
| *                 | HsHeLa3_Ti_103.1327.132  | 2.6273 | 0.2166 | 1229.61 | 1230.36 | 5896.2 | 1   | 487.1  | 65   | 1  | K.VTNIGNQQIDK.V                                |
| *                 | HsFLAG-Control_293_Ti_2( | 4.0082 | 0.12   | 1230.24 | 1230.36 | 4879.4 | 1   | 1073.2 | 90   | 1  | K.VTNIGNQQIDK.V                                |
| *                 | HsFLAG-Control_293_Ti_1( | 4.0577 | 0.1353 | 1230.46 | 1230.36 | 4674.9 | 1   | 1045.2 | 90   | 5  | K.VTNIGNQQIDK.V                                |
| *                 | HsFLAG-Control_HeLa_NE   | 4.1508 | 0.1812 | 1230.63 | 1230.36 | 4329.3 | 1   | 1027.1 | 90   | 12 | K.VTNIGNQQIDK.V                                |
| *                 | HsFLAG-Control_293_Ti_1( | 4.8666 | 0.478  | 1908.16 | 1909.06 | 6667.6 | 1   | 1496.3 | 70.6 | 3  | K.VFNNIGADLLTGSESESENK.E                       |
| *                 | Hs293FLP-MG_Ti_203.267(  | 4.3044 | 0.3734 | 2692.72 | 2693.88 | 8887.3 | 1   | 719.8  | 37.5 | 24 | K.VFNNIGADLLTGSESESENKEDGLQNK.H                |
| *                 | HsFlag1P_Ti_102.2748.274 | 5.0897 | 0.3924 | 2692.74 | 2693.88 | 8641   | 1   | 985.8  | 43.8 | 4  | K.VFNNIGADLLTGSESESENKEDGLQNK.H                |
| *                 | HsFLAG-Control_HeLa_S1(  | 3.8716 | 0.392  | 2692.76 | 2693.88 | 8169   | 1   | 611.7  | 37.5 | 3  | K.VFNNIGADLLTGSESESENKEDGLQNK.H                |
| *                 | HsFLAG-Control_HeLa_NE   | 4.3497 | 0.2556 | 2694.87 | 2693.88 | 4398.9 | 1   | 634.3  | 31.2 | 1  | K.VFNNIGADLLTGSESESENKEDGLQNK.H                |
| *                 | HsFLAG-Control_HeLa_S1(  | 3.7416 | 0.1581 | 2695.29 | 2693.88 | 3661.9 | 1   | 463    | 31.2 | 1  | K.VFNNIGADLLTGSESESENKEDGLQNK.H                |
| *                 | HsFlag1P_Ti_106.2100.210 | 4.5819 | 0.1492 | 1414.4  | 1414.65 | 9689.4 | 1   | 1786.2 | 81.8 | 1  | K.LAKEQEQAQK.LK.S                              |
| *                 | HsFLAG-Control_293_Ti_1( | 3.4152 | 0.3815 | 1858.05 | 1859.18 | 5704.5 | 1   | 445.2  | 50   | 8  | K.SQQPLKPVHTPVATVK.Q                           |
| *                 | HsFLAG-Control_293_Ti_2( | 5.9749 | 0.4437 | 2357.58 | 2357.65 | 8798.3 | 1   | 1918.1 | 59.5 | 12 | K.DLDTLMDNMSSLTSLSVSTPK.S                      |
| *                 | HsFLAG-Control_293_Ti_2( | 3.265  | 0.3017 | 2294.94 | 2295.7  | 4233   | 1   | 446.4  | 43.2 | 1  | K.MTLGTPPTLPNFNALSVPAGAK.Q                     |
| gi 24307971 ref N |                          | 69     | 330    | 0.498   | 464     | 54003  | 6.8 | U      |      |    | serine/threonine kinase 38 like [Homo sapiens] |
| *                 | HsHeLa_Control_Ti_105.36 | 4.5352 | 0.3458 | 2119.73 | 2120.37 | 6657.8 | 1   | 1396.5 | 65.6 | 8  | K.LTLENFYSNLILQHEER.E                          |
| *                 | HsHeLa_Control-MG_Ti_10  | 4.6058 | 0.4289 | 2120.26 | 2120.37 | 7104.2 | 1   | 1625.8 | 68.8 | 10 | K.LTLENFYSNLILQHEER.E                          |
| *                 | HsHeLa_Control-MG_Ti_20  | 4.6795 | 0.2392 | 2120.48 | 2120.37 | 4735.5 | 1   | 797.4  | 43.8 | 3  | K.LTLENFYSNLILQHEER.E                          |
| *                 | HsFLAG-Control_HeLa_NE   | 4.0023 | 0.1453 | 2120.7  | 2120.37 | 6494.2 | 1   | 1090.1 | 45.3 | 1  | K.LTLENFYSNLILQHEER.E                          |
| *                 | Hs293FLP-MG_Ti_203.362   | 4.5047 | 0.4095 | 2120.76 | 2120.37 | 9482.2 | 1   | 1607.3 | 62.5 | 6  | K.LTLENFYSNLILQHEER.E                          |
| *                 | Hs293FLP_Ti_303.3155.31: | 3.867  | 0.2941 | 2121.15 | 2120.37 | 4415.1 | 1   | 807.1  | 43.8 | 1  | K.LTLENFYSNLILQHEER.E                          |
| *                 | Hs293FLP_Ti_303.3153.31: | 4.426  | 0.3666 | 2122.54 | 2120.37 | 6430.5 | 1   | 981.9  | 56.2 | 7  | K.LTLENFYSNLILQHEER.E                          |
| *                 | HsF-IP-293-MG_Ti_105.16: | 4.5688 | 0.5195 | 1820.14 | 1821.01 | 9184.8 | 1   | 2557.6 | 80   | 4  | K.KLEVAMEEEGLADEEK.K                           |
| *                 | HsFlag1P_Ti_104.2542.254 | 4.3493 | 0.3267 | 1393.89 | 1394.57 | 6858   | 1   | 1722.6 | 86.4 | 2  | R.TRLGLDDFESLK.V                               |
| *                 | HsHeLa_Control-MG_Ti_20  | 2.2071 | 0.1872 | 1136.45 | 1137.28 | 5475.6 | 7   | 469.1  | 66.7 | 1  | R.LGLDDFESLK.V                                 |
| *                 | Hs283FLP_Ti_102.2387.23: | 2.6124 | 0.1468 | 1136.51 | 1137.28 | 6595.6 | 1   | 650    | 72.2 | 2  | R.LGLDDFESLK.V                                 |
| *                 | HsF-IP-293-MG_Ti_102.23: | 3.1966 | 0.1292 | 1137.45 | 1137.28 | 4745.1 | 4   | 1061.7 | 88.9 | 8  | R.LGLDDFESLK.V                                 |
| *                 | HsHeLa_Control-MG_Ti_20  | 3.5567 | 0.0911 | 1137.49 | 1137.28 | 6585   | 4   | 1135.6 | 88.9 | 2  | R.LGLDDFESLK.V                                 |
| *                 | HsFLAG-Control_HeLa_NE   | 3.3633 | 0.1906 | 1137.68 | 1137.28 | 6078.1 | 5   | 1197.1 | 88.9 | 10 | R.LGLDDFESLK.V                                 |
| *                 | HsHeLa_Control-MG_Ti_10  | 2.3171 | 0.1532 | 1065.57 | 1066.22 | 6077.8 | 6   | 529.4  | 71.4 | 3  | K.MFYSFQDK.R                                   |
| *                 | HsFLAG-MOCK_300mM_T      | 3.5567 | 0.1127 | 3494    | 3491.88 | 8099.1 | 7   | 426    | 19   | 1  | K.DTLTEETQFYISETVLAIDAIHQLGFIHR.D              |
| *                 | HsFLAG-Control_HeLa_NE   | 3.2661 | 0.2602 | 1355.56 | 1355.57 | 3733.2 | 1   | 534.5  | 77.3 | 15 | R.DIKPDNLLLDK.G                                |
| *                 | HsFLAG-Control_293_Ti_2( | 2.6151 | 0.2965 | 1210.33 | 1211.37 | 5258.2 | 1   | 695.6  | 70   | 4  | K.LSDFGLCTGLK.K                                |
| *                 | HsFLAG-Control_HeLa_NE   | 2.5471 | 0.2723 | 1210.38 | 1211.37 | 5294.4 | 1   | 605    | 65   | 5  | K.LSDFGLCTGLK.K                                |
| *                 | HsHeLa_Control-MG_Ti_20  | 2.5733 | 0.2852 | 1210.38 | 1211.37 | 4203.2 | 1   | 377.7  | 55   | 2  | K.LSDFGLCTGLK.K                                |
| *                 | HsFLAG-Control_MG_293_   | 2.5821 | 0.3547 | 1210.39 | 1211.37 | 5238.7 | 1   | 636.4  | 65   | 4  | K.LSDFGLCTGLK.K                                |
| *                 | Hs293FLP_TREX_Ti_102.2   | 2.6622 | 0.2892 | 1210.4  | 1211.37 | 4466   | 1   | 478.7  | 60   | 2  | K.LSDFGLCTGLK.K                                |
| *                 | Hs293FLP-MG_Ti_202.251(  | 2.3237 | 0.2827 | 1210.45 | 1211.37 | 4990   | 1   | 490.7  | 60   | 1  | K.LSDFGLCTGLK.K                                |
| *                 | HsFLAG-MOCK_300mM_T      | 2.6108 | 0.361  | 1210.47 | 1211.37 | 4601.5 | 1   | 551.2  | 65   | 3  | K.LSDFGLCTGLK.K                                |
| *                 | HsF-IP-293-MG_Ti_102.19: | 2.4689 | 0.2527 | 1210.49 | 1211.37 | 4535   | 1   | 547.2  | 65   | 2  | K.LSDFGLCTGLK.K                                |
| *                 | HsHeLa-FLAG-IP_S100_Ti_  | 1.8467 | 0.1459 | 1210.53 | 1211.37 | 4890.3 | 1   | 392    | 55   | 1  | K.LSDFGLCTGLK.K                                |
| *                 | Hs283FLP_Ti_102.2003.20: | 2.6768 | 0.2557 | 1210.55 | 1211.37 | 4679.7 | 1   | 568.8  | 65   | 2  | K.LSDFGLCTGLK.K                                |
| *                 | HsFLAG-Control_HeLa_NE   | 2.5274 | 0.3029 | 1210.58 | 1211.37 | 5048.5 | 1   | 631.1  | 70   | 2  | K.LSDFGLCTGLK.K                                |
| *                 | HsFLAG-Control_HeLa_S1(  | 2.3076 | 0.2541 | 1210.58 | 1211.37 | 5353.8 | 2   | 480.4  | 60   | 2  | K.LSDFGLCTGLK.K                                |
| *                 | HsFLAG-Control_Hela_Ti_1 | 2.1004 | 0.2798 | 1210.61 | 1211.37 | 5239.4 | 4   | 310.3  | 50   | 2  | K.LSDFGLCTGLK.K                                |
| *                 | HsHeLa_Control_Ti_103.23 | 2.6092 | 0.2765 | 1210.62 | 1211.37 | 4162.2 | 1   | 422.2  | 60   | 2  | K.LSDFGLCTGLK.K                                |
| *                 | HsFLAG-MOCK_150mM_T      | 2.5559 | 0.2977 | 1210.63 | 1211.37 | 4371.3 | 1   | 557.2  | 65   | 2  | K.LSDFGLCTGLK.K                                |
| *                 | Hs293FLP_Ti_302.2103.21( | 2.4897 | 0.2237 | 1210.7  | 1211.37 | 4081.1 | 1   | 469.5  | 60   | 2  | K.LSDFGLCTGLK.K                                |

|                    |                          |        |        |         |         |         |   |        |      |    |                                                       |
|--------------------|--------------------------|--------|--------|---------|---------|---------|---|--------|------|----|-------------------------------------------------------|
|                    | HsHeLa_Control-MG_Ti_10  | 2.4806 | 0.2699 | 1210.72 | 1211.37 | 3999.7  | 1 | 436.9  | 60   | 2  | K.LSDFGLCTGLK.K                                       |
|                    | Hs293FLP-MG_Ti_102.243   | 2.2777 | 0.1812 | 1210.73 | 1211.37 | 4149.3  | 2 | 375.8  | 55   | 2  | K.LSDFGLCTGLK.K                                       |
|                    | HsFLAG-Control_293_Ti_20 | 4.0226 | 0.2724 | 1211.17 | 1211.37 | 6036.8  | 1 | 1564.9 | 90   | 3  | K.LSDFGLCTGLK.K                                       |
|                    | HsFLAG-Control_HeLa_NE   | 3.8264 | 0.3062 | 1211.23 | 1211.37 | 5545    | 2 | 1300   | 85   | 9  | K.LSDFGLCTGLK.K                                       |
|                    | HsFLAG-Control_HeLa_NE   | 3.9803 | 0.2422 | 1211.24 | 1211.37 | 6010.2  | 1 | 1532.1 | 90   | 6  | K.LSDFGLCTGLK.K                                       |
|                    | Hs293FLP_TREX_Ti_102.2   | 3.8489 | 0.3113 | 1211.25 | 1211.37 | 5383.6  | 1 | 1329.4 | 85   | 4  | K.LSDFGLCTGLK.K                                       |
|                    | HsFLAG-Control_HeLa_S10  | 4.022  | 0.2854 | 1211.26 | 1211.37 | 5874    | 2 | 1516.2 | 90   | 11 | K.LSDFGLCTGLK.K                                       |
|                    | HsHeLa-FLAG-IP_S100_Ti   | 4.1443 | 0.3235 | 1211.29 | 1211.37 | 5663.3  | 1 | 1567.1 | 90   | 52 | K.LSDFGLCTGLK.K                                       |
|                    | HsF-IP-293-MG_Ti_102.197 | 3.8997 | 0.3475 | 1211.31 | 1211.37 | 5359.9  | 1 | 1521.9 | 90   | 4  | K.LSDFGLCTGLK.K                                       |
|                    | Hs293FLP-MG_Ti_202.252   | 4.1153 | 0.3165 | 1211.32 | 1211.37 | 6077.1  | 1 | 1604.4 | 90   | 1  | K.LSDFGLCTGLK.K                                       |
|                    | HsFLAG-Control_HeLa_NE   | 4.0494 | 0.2091 | 1211.32 | 1211.37 | 5901.1  | 1 | 1581.2 | 90   | 2  | K.LSDFGLCTGLK.K                                       |
|                    | HsFLAG-MOCK_150mM_T      | 3.9522 | 0.2989 | 1211.44 | 1211.37 | 5985.5  | 1 | 1555.7 | 90   | 2  | K.LSDFGLCTGLK.K                                       |
|                    | HsHeLa_Control-MG_Ti_20  | 3.9398 | 0.2841 | 1211.46 | 1211.37 | 7189.5  | 1 | 1564.6 | 85   | 2  | K.LSDFGLCTGLK.K                                       |
|                    | Hs283FLP_Ti_102.2001.20  | 4.0562 | 0.3185 | 1211.48 | 1211.37 | 5413.7  | 1 | 1513.2 | 90   | 2  | K.LSDFGLCTGLK.K                                       |
|                    | HsFlag1P_Ti_103.2474.247 | 2.3605 | 0.2426 | 1211.55 | 1211.37 | 5138.1  | 1 | 478.4  | 60   | 3  | K.LSDFGLCTGLK.K                                       |
|                    | HsHeLa_Control-MG_Ti_10  | 3.9558 | 0.3415 | 1211.65 | 1211.37 | 5209.5  | 1 | 1430.3 | 90   | 2  | K.LSDFGLCTGLK.K                                       |
|                    | HsHeLa_Control_Ti_103.23 | 3.7085 | 0.2509 | 1212.02 | 1211.37 | 5631.6  | 1 | 1225.4 | 85   | 2  | K.LSDFGLCTGLK.K                                       |
|                    | HsFlag1P_Ti_102.2452.245 | 3.9867 | 0.2505 | 1212.23 | 1211.37 | 5494    | 1 | 1425.2 | 90   | 6  | K.LSDFGLCTGLK.K                                       |
|                    | HsFLAG-MOCK_300mM_T      | 3.9448 | 0.2963 | 1212.46 | 1211.37 | 5598.4  | 1 | 1438.9 | 90   | 3  | K.LSDFGLCTGLK.K                                       |
|                    | HsFLAG-Control_MG_293_   | 3.8678 | 0.3049 | 1212.47 | 1211.37 | 6343.4  | 1 | 1641.9 | 90   | 5  | K.LSDFGLCTGLK.K                                       |
|                    | Hs293FLP-MG_Ti_102.242   | 3.5428 | 0.1193 | 1212.59 | 1211.37 | 5107.3  | 1 | 1225.1 | 85   | 3  | K.LSDFGLCTGLK.K                                       |
|                    | Hs293FLP_Ti_302.2102.21  | 3.8678 | 0.244  | 1212.73 | 1211.37 | 5175.9  | 1 | 1388.9 | 90   | 4  | K.LSDFGLCTGLK.K                                       |
|                    | HsFLAG-MOCK_300mM_T      | 2.772  | 0.2874 | 1338.65 | 1339.54 | 5388.3  | 1 | 426.2  | 59.1 | 1  | K.LSDFGLCTGLK.K.A                                     |
|                    | HsFlag1P_Ti_106.2458.245 | 2.8721 | 0.312  | 1338.78 | 1339.54 | 5464    | 1 | 449.3  | 59.1 | 1  | K.LSDFGLCTGLK.K.A                                     |
|                    | HsFlag1P_Ti_106.2456.245 | 3.7584 | 0.3281 | 1339.14 | 1339.54 | 6523.9  | 1 | 1077.5 | 81.8 | 6  | K.LSDFGLCTGLK.K.A                                     |
|                    | HsFLAG-MOCK_300mM_T      | 3.1443 | 0.2011 | 1339.66 | 1339.54 | 6422.2  | 1 | 903.1  | 77.3 | 7  | K.LSDFGLCTGLK.K.A                                     |
|                    | HsFlag1P_Ti_106.2201.220 | 3.0143 | 0.24   | 1079.47 | 1080.19 | 7686.1  | 3 | 798.5  | 78.6 | 1  | K.AHRTEFYR.N                                          |
| *                  | HsF-IP-293-MG_Ti_106.214 | 4.7908 | 0.5162 | 2078.48 | 2079.25 | 3977.5  | 1 | 741.4  | 64.7 | 17 | R.NLTHNPPSDFSFQNMNSK.R                                |
| *                  | HsF-IP-293-MG_Ti_102.237 | 2.8437 | 0.2186 | 1585.45 | 1585.84 | 3317.3  | 1 | 453.4  | 61.5 | 2  | K.ETLVFPPEVPISEK.A                                    |
| *                  | HsFLAG-MOCK_300mM_T      | 3.5404 | 0.2999 | 1046.31 | 1046.17 | 7664.1  | 2 | 1246.9 | 83.3 | 9  | R.IGNSGVVEEIK.G                                       |
| *                  | HsHeLa_Control-MG_Ti_20  | 4.8318 | 0.2766 | 2756.02 | 2754.03 | 11037.6 | 1 | 1437.1 | 32.6 | 3  | R.IGNSGVVEEIKGHPFFEGVDWEHIR.E                         |
| *                  | HsHeLa_Control-MG_Ti_20  | 4.8305 | 0.4663 | 1726.45 | 1726.89 | 4941.5  | 1 | 899.9  | 73.1 | 5  | K.GHPFFEGVDWEHIR.E                                    |
| *                  | HsFLAG-Control_HeLa_NE   | 3.4702 | 0.221  | 1237.41 | 1237.49 | 6128.6  | 1 | 1005.8 | 80   | 13 | R.ERPAAPIEIK.S                                        |
| *                  | HsFLAG-Control_HeLa_NE   | 4.6684 | 0.1504 | 3301.48 | 3301.46 | 7496.8  | 2 | 533    | 24.1 | 6  | K.SIDDTSNFDDFPESDILQPVPNTTEPDYK.S                     |
| *                  | HsFlag1P_Ti_106.2704.270 | 4.3558 | 0.3136 | 1564.46 | 1564.78 | 5857.8  | 1 | 1325.4 | 81.8 | 5  | K.SKDWVFLNYTYK.R                                      |
| *                  | Hs293FLP-MG_Ti_205.151   | 3.0237 | 0.0912 | 1007.01 | 1007.14 | 7222.4  | 1 | 1414.3 | 100  | 2  | K.RFEGTLTQR.G                                         |
| gij 20127479 ref n |                          | 101    | 380    | 0.496   | 930     | 103533  | 6 | U      |      |    | RNA binding motif protein 10 isoform 1 [Homo sapiens] |
|                    | HsFlag1P_Ti_106.2224.222 | 2.5407 | 0.2286 | 1630.04 | 1629.7  | 7053.6  | 4 | 440.5  | 59.1 | 1  | R.SRDHDYRDMDYR.S                                      |
| *                  | HsHeLa_Control-MG_Ti_10  | 5.4866 | 0.4749 | 3799.26 | 3799.69 | 8647.1  | 1 | 777.1  | 22.7 | 2  | R.EYGSQEGKHVDYDSSSEEQSAEDSYEASPGSETQR.R               |
| *                  | HsHeLa_Control_Ti_102.15 | 5.2572 | 0.4648 | 2920.44 | 2920.8  | 6919    | 1 | 1367.5 | 50   | 2  | K.HDYDSSSEEQSAEDSYEASPGSETQR.R                        |
| *                  | HsHeLa_Control_Ti_102.13 | 3.6239 | 0.0891 | 2904.02 | 2904.75 | 5289.3  | 1 | 578.1  | 45.5 | 1  | R.DQDYRTEQGEEEEEEEEEEEEEEK.A                          |
| *                  | Hs283FLP_Ti_102.1363.13  | 4.3744 | 0.2995 | 2904.23 | 2904.75 | 8935.9  | 1 | 1686.4 | 36.4 | 1  | R.DQDYRTEQGEEEEEEEEEEEEEEK.A                          |
| *                  | HsHeLa_Control-MG_Ti_10  | 4.4496 | 0.1763 | 2904.4  | 2904.75 | 5703.6  | 1 | 806.1  | 50   | 1  | R.DQDYRTEQGEEEEEEEEEEEEEEK.A                          |
| *                  | Hs293FLP_Ti_302.1375.13  | 3.7909 | 0.1445 | 2904.85 | 2904.75 | 6122.9  | 1 | 796.4  | 47.7 | 1  | R.DQDYRTEQGEEEEEEEEEEEEEEK.A                          |
| *                  | HsHeLa_Control_Ti_102.14 | 5.7004 | 0.3293 | 2905.24 | 2904.75 | 8060.5  | 1 | 2058.5 | 40.9 | 1  | R.DQDYRTEQGEEEEEEEEEEEEEEK.A                          |
| *                  | Hs293FLP-MG_Ti_201.040   | 5.7663 | 0.3236 | 2226.88 | 2227.08 | 9662.6  | 1 | 2252.8 | 67.6 | 11 | R.TEQGEEEEEEEEEEEEEEK.A                               |
|                    | Hs293FLP_Ti_305.1079.10  | 2.0714 | 0.0834 | 1180.5  | 1181.3  | 4592    | 9 | 300.7  | 60   | 1  | R.GQLQSHGVQAR.E                                       |
|                    | Hs293FLP-MG_Ti_205.125   | 3.6294 | 0.3232 | 1180.54 | 1181.3  | 8588.5  | 1 | 1165.7 | 75   | 8  | R.GQLQSHGVQAR.E                                       |

|                          |        |        |         |         |        |   |        |      |                                         |
|--------------------------|--------|--------|---------|---------|--------|---|--------|------|-----------------------------------------|
| HsHeLa_Control-MG_Ti_10  | 2.1742 | 0.0972 | 1180.87 | 1181.3  | 4327.4 | 5 | 317.3  | 60   | 1 R.GQLQSHGVQAR.E                       |
| Hs293FLP_TREX_Ti_105.1   | 3.6954 | 0.3178 | 1181.18 | 1181.3  | 6944   | 1 | 1068.5 | 75   | 19 R.GQLQSHGVQAR.E                      |
| HsFLAG-Control_MG_293_   | 3.6442 | 0.3241 | 1181.36 | 1181.3  | 6267.1 | 1 | 1113.3 | 85   | 2 R.GQLQSHGVQAR.E                       |
| HsFLAG-Control_MG_293_   | 2.4    | 0.155  | 1181.45 | 1181.3  | 5409.5 | 6 | 363.8  | 60   | 1 R.GQLQSHGVQAR.E                       |
| HsFLAG-Control_Hela_Ti_1 | 3.7211 | 0.2977 | 1182.21 | 1181.3  | 7236.5 | 1 | 1331.3 | 85   | 5 R.GQLQSHGVQAR.E                       |
| HsFLAG-Control_HeLa_NE   | 4.4983 | 0.428  | 1725.08 | 1725.9  | 9222   | 1 | 1748.1 | 71.4 | 6 R.GFAFVEFSLQDATR.W                    |
| HsHeLa_Control-MG_Ti_20  | 5.1413 | 0.5023 | 1725.1  | 1725.9  | 7337.8 | 1 | 1979.5 | 82.1 | 5 R.GFAFVEFSLQDATR.W                    |
| HsHeLa_Control-MG_Ti_20  | 3.5406 | 0.2981 | 1726.86 | 1725.9  | 5898.5 | 1 | 1256.7 | 48.2 | 1 R.GFAFVEFSLQDATR.W                    |
| HsHeLa_Control-MG_Ti_10  | 3.7665 | 0.3034 | 1727.27 | 1725.9  | 5166.5 | 1 | 1323.2 | 50   | 1 R.GFAFVEFSLQDATR.W                    |
| HsHeLa_Control_Ti_104.33 | 3.5384 | 0.185  | 1727.47 | 1725.9  | 5135.4 | 1 | 1320   | 50   | 1 R.GFAFVEFSLQDATR.W                    |
| HsHeLa_Control_Ti_104.33 | 4.4451 | 0.446  | 1727.77 | 1725.9  | 5795.7 | 1 | 1557.3 | 78.6 | 5 R.GFAFVEFSLQDATR.W                    |
| Hs293FLP_Ti_304.2631.26  | 4.6098 | 0.3769 | 1727.85 | 1725.9  | 6756.5 | 1 | 2053   | 82.1 | 14 R.GFAFVEFSLQDATR.W                   |
| HsFlag1P_Ti_106.2548.254 | 5.4069 | 0.4044 | 1770.27 | 1770.02 | 9851.6 | 1 | 2367.9 | 78.6 | 9 R.WMEANQHSLNILGQK.V                   |
| HsFLAG-MOCK_300mM_T      | 2.2163 | 0.2357 | 1288.63 | 1289.49 | 3618.1 | 3 | 353.9  | 65   | 1 K.VSMHYSDPKPK.I                       |
| HsFlag1P_Ti_102.2178.217 | 2.5288 | 0.1476 | 1191.29 | 1192.28 | 6235.8 | 1 | 522.5  | 68.8 | 2 K.INEDWLCNK.C                         |
| HsHeLa_Control-MG_Ti_10  | 2.5844 | 0.2116 | 1191.58 | 1192.28 | 5788.1 | 5 | 514.7  | 68.8 | 2 K.INEDWLCNK.C                         |
| Hs293FLP-MG_Ti_102.206   | 2.5039 | 0.2577 | 1191.66 | 1192.28 | 6146.3 | 4 | 447.5  | 62.5 | 1 K.INEDWLCNK.C                         |
| HsHeLa_Control-MG_Ti_10  | 3.3874 | 0.219  | 1192.72 | 1192.28 | 6003.4 | 1 | 1106.1 | 87.5 | 4 K.INEDWLCNK.C                         |
| HsFLAG-Control_HeLa_NE   | 3.3236 | 0.2222 | 1193.33 | 1192.28 | 8162.2 | 1 | 1244.4 | 87.5 | 1 K.INEDWLCNK.C                         |
| HsHeLa_Control-MG_Ti_10  | 4.0826 | 0.1948 | 1329.89 | 1329.5  | 4900.3 | 3 | 1121.7 | 77.3 | 4 K.SEAQKPLPLGTR.L                      |
| HsHeLa_Control-MG_Ti_20  | 4.268  | 0.2497 | 1198.4  | 1198.37 | 5439.1 | 1 | 1362.7 | 95   | 11 R.LDQQTLPLGGR.E                      |
|                          |        |        |         |         |        |   |        |      | R.ELSQGLLPLPQPYQAQGVLASQALSQSGSEPSSENAN |
| Hs293FLP-MG_Ti_202.410   | 3.9939 | 0.3174 | 4422.41 | 4422.89 | 6400.9 | 1 | 450.6  | 18.3 | 2 DTIILR.N                              |
| HsHeLa_Control-MG_Ti_20  | 4.744  | 0.4219 | 2827.69 | 2829.2  | 7040   | 1 | 1139.3 | 46.2 | 2 R.NLNPHSTMDSILGALAPYAVLSSSNVR.V       |
| Hs293FLP-MG_Ti_205.408   | 4.6483 | 0.241  | 2827.95 | 2829.2  | 7557.1 | 1 | 1217.4 | 32.7 | 2 R.NLNPHSTMDSILGALAPYAVLSSSNVR.V       |
| HsHeLa_Control-MG_Ti_20  | 4.3762 | 0.3177 | 2828.64 | 2829.2  | 9567.3 | 1 | 1478.4 | 31.7 | 2 R.NLNPHSTMDSILGALAPYAVLSSSNVR.V       |
| Hs293FLP-MG_Ti_205.407   | 4.4509 | 0.338  | 2828.76 | 2829.2  | 6829.3 | 1 | 1296.6 | 48.1 | 1 R.NLNPHSTMDSILGALAPYAVLSSSNVR.V       |
| HsHeLa_Control-MG_Ti_10  | 3.6661 | 0.3442 | 2829.29 | 2829.2  | 5739.5 | 1 | 766.7  | 40.4 | 2 R.NLNPHSTMDSILGALAPYAVLSSSNVR.V       |
| Hs293FLP_Ti_306.3446.34  | 3.9379 | 0.2906 | 2829.35 | 2829.2  | 5898.9 | 1 | 721.8  | 40.4 | 2 R.NLNPHSTMDSILGALAPYAVLSSSNVR.V       |
| HsHeLa_Control-MG_Ti_10  | 4.3703 | 0.1372 | 2829.81 | 2829.2  | 6719   | 1 | 1090.2 | 30.8 | 1 R.NLNPHSTMDSILGALAPYAVLSSSNVR.V       |
| Hs293FLP_Ti_305.3753.37  | 4.3448 | 0.2356 | 2830    | 2829.2  | 6641.3 | 4 | 744.9  | 28.8 | 2 R.NLNPHSTMDSILGALAPYAVLSSSNVR.V       |
| HsHeLa_Control-MG_Ti_20  | 2.2886 | 0.2035 | 921.4   | 922.069 | 5470.9 | 9 | 408.5  | 71.4 | 7 K.TINVEFAK.G                          |
| Hs293FLP-MG_Ti_202.201   | 2.7263 | 0.1106 | 922.33  | 922.069 | 2462.9 | 3 | 513.4  | 85.7 | 1 K.TINVEFAK.G                          |
|                          |        |        |         |         |        |   |        |      | K.GTKGPGITGKGDPTGAGPEASLEPGADSVSMQAFS   |
| Hs293FLP-MG_Ti_205.217   | 4.5107 | 0.2996 | 3533.36 | 3533.85 | 6108.9 | 2 | 464.7  | 21.5 | 1 R.A                                   |
| HsF-IP-293-MG_Ti_102.21  | 5.6979 | 0.3628 | 2534.89 | 2535.7  | 4435.1 | 1 | 791.4  | 52   | 15 K.GDPTGAGPEASLEPGADSVSMQAFSR.A       |
|                          |        |        |         |         |        |   |        |      | R.AQPGAAPGIYQQSAEASSSQGTAANSQSYTIMSPA   |
| HsFlag1P_Ti_105.2566.256 | 8.1089 | 0.5995 | 3768.76 | 3770.12 | 8722.1 | 1 | 2327.2 | 33.1 | 27 LK.S                                 |
| Hs293FLP-MG_Ti_103.160   | 2.3072 | 0.2638 | 1516.64 | 1516.65 | 4750.8 | 1 | 419.4  | 61.5 | 2 R.TYVPALEQSADGHK.E                    |
| Hs293FLP_TREX_Ti_103.1   | 3.631  | 0.3802 | 1516.44 | 1516.65 | 4525.3 | 1 | 903.2  | 80.8 | 4 R.TYVPALEQSADGHK.E                    |
| Hs293FLP-MG_Ti_203.168   | 2.3773 | 0.2259 | 1516.6  | 1516.65 | 5973.5 | 1 | 317.8  | 50   | 2 R.TYVPALEQSADGHK.E                    |
| Hs283FLP_Ti_103.1435.14  | 2.5233 | 0.2224 | 1516.62 | 1516.65 | 4188.9 | 1 | 464.4  | 65.4 | 1 R.TYVPALEQSADGHK.E                    |
| HsHeLa_Control-MG_Ti_20  | 4.0518 | 0.3786 | 1517.43 | 1516.65 | 4765   | 1 | 782.5  | 73.1 | 6 R.TYVPALEQSADGHK.E                    |
| Hs293FLP-MG_Ti_203.168   | 3.4167 | 0.2487 | 1517.45 | 1516.65 | 4200   | 1 | 546.1  | 65.4 | 2 R.TYVPALEQSADGHK.E                    |
| Hs293FLP-MG_Ti_103.159   | 3.3858 | 0.3642 | 1517.82 | 1516.65 | 4231.1 | 1 | 747    | 76.9 | 2 R.TYVPALEQSADGHK.E                    |
| HsHeLa_Control-MG_Ti_10  | 4.4337 | 0.4303 | 2186.84 | 2187.37 | 6324.5 | 1 | 968.6  | 57.5 | 3 R.TYVPALEQSADGHKETGAPSK.E             |
| Hs293FLP-MG_Ti_203.199   | 2.0984 | 0.1654 | 1148.47 | 1149.29 | 2716.5 | 2 | 191.1  | 72.2 | 1 K.NSFQPISSLR.D                        |
| HsF-IP-293-MG_Ti_103.168 | 2.365  | 0.2641 | 1148.48 | 1149.29 | 2091.8 | 2 | 135.1  | 72.2 | 1 K.NSFQPISSLR.D                        |
| Hs283FLP_Ti_103.1627.16  | 2.9629 | 0.2357 | 1149.47 | 1149.29 | 4091.4 | 3 | 674.4  | 83.3 | 3 K.NSFQPISSLR.D                        |



|                          |        |        |         |         |        |       |                         |      |                                    |
|--------------------------|--------|--------|---------|---------|--------|-------|-------------------------|------|------------------------------------|
| Hs293FLP-MG_Ti_203.199   | 2.7046 | 0.1925 | 1149.5  | 1149.29 | 4283.9 | 2     | 665.6                   | 83.3 | 1 K.NSFQPISSLR.D                   |
| HsF-IP-293-MG_Ti_103.167 | 2.6274 | 0.166  | 1149.51 | 1149.29 | 3712.3 | 6     | 532.3                   | 77.8 | 1 K.NSFQPISSLR.D                   |
| Hs283FLP_Ti_102.1766.17  | 2.3318 | 0.2714 | 1438.55 | 1439.56 | 2791.5 | 1     | 271.1                   | 57.7 | 1 R.ESATADAGYAILEK.K               |
| HsHeLa_Control-MG_Ti_10  | 2.316  | 0.3256 | 1438.7  | 1439.56 | 3518   | 1     | 413.2                   | 65.4 | 1 R.ESATADAGYAILEK.K               |
| Hs293FLP-MG_Ti_102.207   | 2.4671 | 0.2685 | 1438.74 | 1439.56 | 3187.7 | 1     | 338.2                   | 61.5 | 2 R.ESATADAGYAILEK.K               |
| HsFLAG-Control_HeLa_NE   | 4.2382 | 0.3887 | 1438.91 | 1439.56 | 7071.8 | 1     | 2220.1                  | 84.6 | 14 R.ESATADAGYAILEK.K              |
| HsF-IP-293-MG_Ti_102.175 | 4.35   | 0.3192 | 1439.56 | 1439.56 | 6814.5 | 1     | 2014.1                  | 84.6 | 8 R.ESATADAGYAILEK.K               |
| HsHeLa_Control-MG_Ti_10  | 4.2312 | 0.3601 | 1439.78 | 1439.56 | 6549.5 | 1     | 1890.2                  | 84.6 | 6 R.ESATADAGYAILEK.K               |
| Hs293FLP-MG_Ti_202.021   | 4.0079 | 0.3795 | 1441.63 | 1439.56 | 6912.8 | 1     | 1504                    | 73.1 | 8 R.ESATADAGYAILEK.K               |
| HsHeLa_Control-MG_Ti_10  | 2.5786 | 0.0966 | 1214.14 | 1211.32 | 5412.3 | 2     | 491.2                   | 70   | 1 K.LASDDRSPPPR.G                  |
| HsF-IP-293-MG_Ti_106.184 | 2.4745 | 0.1137 | 1047.51 | 1048.19 | 4077   | 1     | 391.5                   | 75   | 1 R.HQQLSGLHK.Q                    |
| HsHeLa_Control-MG_Ti_10  | 2.4092 | 0.1628 | 1047.79 | 1048.19 | 4590   | 2     | 384.7                   | 68.8 | 1 R.HQQLSGLHK.Q                    |
| HsFLAG-Control_HeLa_NE   | 3.11   | 0.0924 | 1048.24 | 1048.19 | 6182.4 | 2     | 842.8                   | 81.2 | 1 R.HQQLSGLHK.Q                    |
| HsHeLa_Control-MG_Ti_10  | 3.0269 | 0.0993 | 1048.83 | 1048.19 | 5767   | 1     | 830                     | 87.5 | 2 R.HQQLSGLHK.Q                    |
| Hs293FLP-MG_Ti_205.181   | 4.0299 | 0.2007 | 1639.64 | 1639.81 | 9684.4 | 1     | 1669.7                  | 73.1 | 5 R.RAHLSENELEALEK.N               |
| HsHeLa_Control-MG_Ti_20  | 2.7825 | 0.2137 | 1482.46 | 1483.62 | 4364.5 | 1     | 524.8                   | 58.3 | 2 R.AHLSENELEALEK.N                |
| Hs293FLP-MG_Ti_203.192   | 3.0185 | 0.184  | 1482.55 | 1483.62 | 6558.5 | 1     | 832.2                   | 62.5 | 2 R.AHLSENELEALEK.N                |
| Hs293FLP_Ti_303.1679.16  | 3.2309 | 0.2489 | 1482.74 | 1483.62 | 4590.3 | 1     | 575.5                   | 58.3 | 1 R.AHLSENELEALEK.N                |
| HsHeLa_Control-MG_Ti_20  | 4.5638 | 0.392  | 1482.83 | 1483.62 | 5983   | 1     | 1394.1                  | 87.5 | 1 R.AHLSENELEALEK.N                |
| HsFLAG-Control_HeLa_NE   | 4.4097 | 0.3893 | 1482.85 | 1483.62 | 5190.9 | 1     | 1433.6                  | 87.5 | 10 R.AHLSENELEALEK.N               |
| HsF-IP-293-MG_Ti_104.167 | 4.1295 | 0.3485 | 1483.29 | 1483.62 | 5072.4 | 1     | 1215.8                  | 83.3 | 13 R.AHLSENELEALEK.N               |
| Hs293FLP-MG_Ti_203.191   | 4.5868 | 0.4135 | 1483.59 | 1483.62 | 5865.6 | 1     | 1531.2                  | 87.5 | 2 R.AHLSENELEALEK.N                |
| Hs283FLP_Ti_104.1561.15  | 3.0485 | 0.1979 | 1483.62 | 1483.62 | 5321.1 | 1     | 794.7                   | 66.7 | 1 R.AHLSENELEALEK.N                |
| Hs283FLP_Ti_104.1553.15  | 3.1976 | 0.1039 | 1484.25 | 1483.62 | 5841   | 1     | 1053.8                  | 83.3 | 1 R.AHLSENELEALEK.N                |
| HsHeLa_Control-MG_Ti_20  | 1.8126 | 0.082  | 1126.5  | 1127.28 | 3899.3 | 7     | 331.7                   | 55.6 | 1 K.YGIPEPPEPK.R                   |
| HsHeLa_Control-MG_Ti_10  | 5.1422 | 0.4216 | 1858.36 | 1857.03 | 5259.6 | 1     | 2001.7                  | 78.1 | 5 R.KYGGISTASVDFEQPTR.D            |
| HsFlag1P_Ti_105.2252.225 | 3.8658 | 0.2669 | 2928.17 | 2929.13 | 7617.4 | 1     | 979                     | 30.6 | 1 R.KYGGISTASVDFEQPTRDGLGSDNIGSR.M |
| HsHeLa_Control-MG_Ti_20  | 4.949  | 0.4651 | 1729.63 | 1728.86 | 7850.2 | 1     | 1414.2                  | 66.7 | 18 R.KYGGISTASVDFEQPTR.D           |
| HsHeLa_Control-MG_Ti_10  | 3.6549 | 0.302  | 1091.59 | 1091.12 | 4011.7 | 1     | 771.8                   | 80   | 8 R.DGLGSDNIGSR.M                  |
| HsFlag1P_Ti_106.2481.248 | 1.9421 | 0.1137 | 964.4   | 965.217 | 6583.3 | 9     | 683.2                   | 78.6 | 1 R.MLQAMGWK.E                     |
| HsHeLa_Control-MG_Ti_20  | 3.5071 | 0.2445 | 1441.52 | 1441.67 | 7138.2 | 2     | 922.8                   | 66.7 | 5 K.KQGIVTPIEAQTR.V                |
| HsFlag1P_Ti_104.1989.198 | 2.9007 | 0.1916 | 1312.69 | 1313.5  | 4627.4 | 1     | 905.9                   | 86.4 | 5 K.QGIVTPIEAQTR.V                 |
| HsFLAG-Control_HeLa_NE   | 2.3634 | 0.3301 | 1365.35 | 1366.42 | 6452.2 | 1     | 485.8                   | 58.3 | 1 R.GSSYGVSTESYK.E                 |
| HsFLAG-Control_Hela_Ti_1 | 1.9639 | 0.2699 | 1365.46 | 1366.42 | 5462.4 | 1     | 384.5                   | 54.2 | 1 R.GSSYGVSTESYK.E                 |
| HsF-IP-293-MG_Ti_102.135 | 2.4856 | 0.1599 | 1365.47 | 1366.42 | 5114.6 | 7     | 231.4                   | 45.8 | 1 R.GSSYGVSTESYK.E                 |
| Hs283FLP_Ti_102.1346.13  | 2.5386 | 0.2461 | 1365.55 | 1366.42 | 4936.9 | 1     | 367.9                   | 54.2 | 1 R.GSSYGVSTESYK.E                 |
| HsHeLa_Control_Ti_102.13 | 2.2511 | 0.1992 | 1365.6  | 1366.42 | 5313.6 | 1     | 413.7                   | 54.2 | 1 R.GSSYGVSTESYK.E                 |
| HsHeLa_Control-MG_Ti_20  | 3.5419 | 0.3333 | 1366.19 | 1366.42 | 6111.3 | 1     | 1364.2                  | 79.2 | 8 R.GSSYGVSTESYK.E                 |
| HsF-IP-293-MG_Ti_102.135 | 3.6824 | 0.3676 | 1366.37 | 1366.42 | 4805.4 | 1     | 1076.5                  | 79.2 | 6 R.GSSYGVSTESYK.E                 |
| HsFLAG-Control_Hela_Ti_1 | 2.8624 | 0.2878 | 1366.45 | 1366.42 | 6229.7 | 1     | 878.7                   | 66.7 | 2 R.GSSYGVSTESYK.E                 |
| Hs293FLP_TREX_Ti_102.1   | 2.8776 | 0.2978 | 1366.45 | 1366.42 | 5552.4 | 1     | 747.8                   | 66.7 | 1 R.GSSYGVSTESYK.E                 |
| HsHelaFlag1P_Ti_102.1344 | 2.5134 | 0.3016 | 1367.41 | 1366.42 | 3939.1 | 2     | 358.8                   | 50   | 2 R.GSSYGVSTESYK.E                 |
| HsHeLa_Control_Ti_102.13 | 2.8562 | 0.29   | 1368.53 | 1366.42 | 4229.4 | 1     | 562.3                   | 62.5 | 2 R.GSSYGVSTESYK.E                 |
| HsFlag1P_Ti_105.1812.181 | 4.2098 | 0.5065 | 1974.1  | 1975.12 | 7301.3 | 1     | 778.5                   | 50   | 4 R.GSSYGVSTESYKETLHK.T            |
| gij 21626466 ref N       | 50     | 189    | 0.492   | 847     | 94623  | 6.3 U | matrin 3 [Homo sapiens] |      |                                    |
| gij 62750354 ref N       | 50     | 189    | 0.492   | 847     | 94623  | 6.3 U | matrin 3 [Homo sapiens] |      |                                    |
| HsFLAG-Control_HeLa_NE   | 2.7045 | 0.1913 | 1040.27 | 1040.12 | 6703.4 | 2     | 1063.3                  | 87.5 | 4 K.SFQQSSLSR.D                    |
| HsHeLa3_Ti_103.4678.467  | 2.7763 | 0.2188 | 2372.97 | 2372.74 | 8352.7 | 1     | 431.7                   | 33.3 | 1 R.DLSAAGIGLLAAATQSLSPASLGR.M     |
| HsHeLa3_Ti_103.4659.465  | 5.4666 | 0.4164 | 2373.68 | 2372.74 | 6627.4 | 1     | 1162.6                  | 35.4 | 2 R.DLSAAGIGLLAAATQSLSPASLGR.M     |

|                          |        |        |         |         |        |   |        |      |    | R.LASLMNLGMSSSLNQQGAHSALSSASTSSHNLQSFN   |
|--------------------------|--------|--------|---------|---------|--------|---|--------|------|----|------------------------------------------|
| HsFLAG-MOCK_300mM_T      | 4.9348 | 0.3569 | 4205.54 | 4206.65 | 6896.5 | 1 | 764.4  | 22.5 | 2  | IGSR.G                                   |
| HsFLAG-Control_HeLa_NE   | 3.1146 | 0.2376 | 1092.91 | 1092.24 | 4479.7 | 1 | 586.4  | 77.8 | 4  | R.GPLPLSSQHR.G                           |
| HsFLAG-MOCK_300mM_T      | 5.8236 | 0.3016 | 2870    | 2867.15 | 8033   | 1 | 1978.6 | 36.1 | 3  | R.GPLPLSSQHRGDADQASNILASFGLSAR.D         |
| HsFLAG-Control_HeLa_NE   | 5.9665 | 0.414  | 1794.59 | 1793.93 | 7621.5 | 1 | 1856.5 | 70.6 | 18 | R.GDADQASNILASFGLSAR.D                   |
| HsFLAG-Control_HeLa_NE   | 4.2488 | 0.2124 | 1481.01 | 1480.57 | 8784.5 | 1 | 1375.1 | 77.3 | 3  | R.DLDELSRYPEDK.I                         |
| HsFLAG-Control_HeLa_NE   | 4.4869 | 0.1992 | 3081.59 | 3082.52 | 7448.9 | 1 | 881    | 29   | 3  | R.DLDELSRYPEDKITPENLPQILLQLK.R           |
| HsFLAG-Control_HeLa_NE   | 3.1688 | 0.1607 | 1620.43 | 1620.97 | 4256.1 | 1 | 564.5  | 69.2 | 10 | K.ITPENLPQILLQLK.R                       |
| HsFLAG-Control_HeLa_NE   | 3.254  | 0.1807 | 1366.07 | 1366.47 | 7409.3 | 1 | 834.5  | 68.2 | 1  | R.RTEEGPTLSYGR.D                         |
| HsFLAG-Control_HeLa_NE   | 3.5052 | 0.2862 | 1210.28 | 1210.29 | 6300.8 | 1 | 1674.3 | 90   | 12 | R.TEEGPTLSYGR.D                          |
| HsFLAG-Control_HeLa_NE   | 4.7108 | 0.2587 | 2363.46 | 2363.46 | 7509.9 | 1 | 1480.2 | 43.8 | 2  | R.DSFDDRGPVSLNPVLDYDHGSR.S               |
| HsFLAG-Control_HeLa_NE   | 3.8331 | 0.3735 | 1627.69 | 1627.75 | 4710.9 | 1 | 643.8  | 64.3 | 4  | R.GPSLNPVLDYDHGSR.S                      |
| HsFLAG-MOCK_300mM_T      | 4.2044 | 0.3972 | 2929.02 | 2927.98 | 5947.3 | 1 | 582.1  | 29.5 | 1  | R.CRDDSFGETSHNYHKFDSEYER.M               |
| HsFLAG-MOCK_300mM_T      | 3.197  | 0.2557 | 1198.75 | 1198.39 | 5476.3 | 1 | 810.9  | 75   | 2  | R.MGRGPGPLQER.S                          |
| HsHeLa3_Ti_106.2202.220  | 5.239  | 0.4421 | 1998.13 | 1998.18 | 8477.2 | 1 | 1847.9 | 68.8 | 5  | K.GYPHLCSDLPVHSNK.E                      |
| HsHeLa3_Ti_106.1926.192  | 3.2418 | 0.4125 | 1509.68 | 1509.58 | 5716.3 | 1 | 728.5  | 70.8 | 2  | K.EWSQHINGASHSR.R                        |
| HsFLAG-Control_HeLa_NE   | 2.1549 | 0.1797 | 1324.73 | 1325.43 | 3828.8 | 7 | 144.7  | 46.2 | 1  | R.GNLGAGNGNLQGPR.H                       |
| HsFLAG-Control_HeLa_NE   | 3.2401 | 0.3705 | 1324.91 | 1325.43 | 9351.1 | 1 | 1091.2 | 65.4 | 4  | R.GNLGAGNGNLQGPR.H                       |
| HsFLAG-Control_HeLa_NE   | 3.3749 | 0.4203 | 1325.26 | 1325.43 | 9941.4 | 1 | 1568.3 | 73.1 | 3  | R.GNLGAGNGNLQGPR.H                       |
| HsFLAG-MOCK_300mM_T      | 1.8975 | 0.1429 | 1144.68 | 1145.37 | 4957.8 | 1 | 500.4  | 62.5 | 1  | R.VVHIMDFQR.G                            |
| HsHeLa3_Ti_106.2188.218  | 2.5793 | 0.3219 | 1145.87 | 1145.37 | 4264   | 2 | 924.9  | 87.5 | 2  | R.VVHIMDFQR.G                            |
| HsFLAG-Control_HeLa_NE   | 5.1828 | 0.3867 | 2438.84 | 2439.9  | 5033.7 | 1 | 651.6  | 52.5 | 4  | R.YQLLQVLEPFGVISNHLILNK.I                |
| HsHeLa3_Ti_106.3174.317  | 4.7847 | 0.3334 | 2439.53 | 2439.9  | 4434.5 | 1 | 725.3  | 57.5 | 2  | R.YQLLQVLEPFGVISNHLILNK.I                |
| HsFLAG-Control_HeLa_NE   | 4.8382 | 0.3174 | 2440.38 | 2439.9  | 6700.3 | 1 | 755.6  | 32.5 | 2  | R.YQLLQVLEPFGVISNHLILNK.I                |
| HsFLAG-MOCK_300mM_T      | 4.4277 | 0.3504 | 2440.97 | 2439.9  | 3716.4 | 1 | 645.2  | 60   | 2  | R.YQLLQVLEPFGVISNHLILNK.I                |
| HsFLAG-MOCK_300mM_T      | 4.1433 | 0.2313 | 2441.37 | 2439.9  | 5767.5 | 1 | 775.3  | 36.2 | 3  | R.YQLLQVLEPFGVISNHLILNK.I                |
| HsHeLa3_Ti_106.3175.317  | 4.2146 | 0.2672 | 2442.35 | 2439.9  | 5570.8 | 1 | 772.9  | 35   | 1  | R.YQLLQVLEPFGVISNHLILNK.I                |
| HsFLAG-Control_HeLa_NE   | 4.8231 | 0.3059 | 2037.7  | 2038.31 | 5095.3 | 1 | 800.4  | 61.1 | 4  | R.VIHLNLPVPHSGYSDSAVLK.L                 |
| HsGST-MOCK_Ti_104.163    | 3.6396 | 0.3401 | 2037.8  | 2038.31 | 6117.7 | 1 | 1123.1 | 41.7 | 1  | R.VIHLNLPVPHSGYSDSAVLK.L                 |
| HsHeLa3_Ti_106.2174.217  | 5.1147 | 0.3317 | 2038.05 | 2038.31 | 4735.7 | 1 | 1143.4 | 69.4 | 2  | R.VIHLNLPVPHSGYSDSAVLK.L                 |
| HsFLAG-Control_HeLa_NE   | 3.852  | 0.2592 | 2038.29 | 2038.31 | 7449.1 | 1 | 711.6  | 33.3 | 2  | R.VIHLNLPVPHSGYSDSAVLK.L                 |
| HsFLAG-MOCK_300mM_T      | 5.465  | 0.351  | 2039.39 | 2038.31 | 4801.2 | 1 | 1077.5 | 69.4 | 6  | R.VIHLNLPVPHSGYSDSAVLK.L                 |
| HsHeLa3_Ti_106.2191.219  | 3.5847 | 0.2824 | 2039.59 | 2038.31 | 5497.2 | 1 | 656    | 36.1 | 1  | R.VIHLNLPVPHSGYSDSAVLK.L                 |
| HsFLAG-MOCK_300mM_T      | 3.4657 | 0.301  | 2442.39 | 2442.55 | 5794.6 | 1 | 408.4  | 42.9 | 1  | K.KSKTDGSQKTESSTEGKEQEEK.S               |
| HsFLAG-Control_HeLa_NE   | 4.2771 | 0.3663 | 1916.76 | 1916.05 | 9544.1 | 2 | 1222.9 | 56.2 | 8  | K.IEELDQENEAALENGIK.N                    |
|                          |        |        |         |         |        |   |        |      |    | K.IEELDQENEAALENGIKNEENTEPGAESSENADDPNK. |
| HsFLAG-Control_HeLa_NE   | 4.7778 | 0.3404 | 4044.26 | 4045.1  | 6046.5 | 1 | 806.9  | 26.4 | 2  | D                                        |
| HsHeLa3_Ti_102.0813.081  | 3.8301 | 0.2046 | 2148.3  | 2148.07 | 3355   | 1 | 458.7  | 55.3 | 3  | K.NEENTEPGAESSENADDPNK.D                 |
| HsGST-MOCK_Ti_402.208    | 4.1158 | 0.4151 | 2777.9  | 2778.73 | 9302.9 | 1 | 1244   | 47.8 | 1  | K.DTSENADGQSDENKDDYIPDEYR.I              |
| HsFLAG-Control_HeLa_NE   | 3.7166 | 0.2737 | 2778.37 | 2778.73 | 6765   | 1 | 764    | 30.4 | 1  | K.DTSENADGQSDENKDDYIPDEYR.I              |
| HsFlag1P_Ti_106.2761.276 | 4.2086 | 0.3428 | 1969.83 | 1970.32 | 4303.6 | 1 | 637.3  | 58.8 | 18 | R.IGPYQPNVPVGDYVIPK.T                    |
| HsFLAG-Control_HeLa_NE   | 4.4376 | 0.3049 | 1970.24 | 1970.32 | 6972.6 | 1 | 1693.7 | 47.1 | 1  | R.IGPYQPNVPVGDYVIPK.T                    |
| HsFLAG-Control_HeLa_NE   | 4.6731 | 0.3271 | 1972.03 | 1970.32 | 4294.9 | 1 | 819.2  | 64.7 | 22 | R.IGPYQPNVPVGDYVIPK.T                    |
| HsHeLa3_Ti_103.2062.206  | 3.2572 | 0.3673 | 1574.56 | 1574.74 | 6239.6 | 1 | 433.7  | 54.2 | 3  | K.LCSLFYTNNEEVAK.N                       |
| HsFLAG-Control_HeLa_NE   | 3.0936 | 0.0991 | 1574.64 | 1574.74 | 5894.8 | 1 | 611.4  | 62.5 | 2  | K.LCSLFYTNNEEVAK.N                       |
| HsGST-MOCK_Ti_105.123    | 3.0794 | 0.3567 | 1472.43 | 1472.57 | 6396.3 | 1 | 611.5  | 63.6 | 4  | K.NTHCSSLPHYQK.L                         |
| HsHeLa3_Ti_106.1922.192  | 3.1028 | 0.4483 | 1472.63 | 1472.57 | 6470.9 | 1 | 1046.4 | 77.3 | 1  | K.NTHCSSLPHYQK.L                         |
| HsFLAG-MOCK_300mM_T      | 3.1818 | 0.32   | 1472.63 | 1472.57 | 5075.7 | 1 | 497.4  | 68.2 | 1  | K.NTHCSSLPHYQK.L                         |
| HsFLAG-MOCK_300mM_T      | 3.303  | 0.3136 | 1715.05 | 1713.9  | 5624.7 | 1 | 768.2  | 65.4 | 1  | K.NTHCSSLPHYQK.LK.K                      |

| gi 74136883 ref N         | 80     | 431    | 0.49    | 825     | 90585   | 6 U | heterogeneous nuclear ribonucleoprotein U isoform a [Homo sapiens] |      |    |                                         |
|---------------------------|--------|--------|---------|---------|---------|-----|--------------------------------------------------------------------|------|----|-----------------------------------------|
| HsHeLa_Control-MG_Ti_10   | 3.3075 | 0.1768 | 1075.64 | 1075.25 | 5672.7  | 8   | 1041.8                                                             | 87.5 | 5  | K.VSELKEELK.K                           |
| Hs293FLP-MG_Ti_204.137    | 3.4889 | 0.1285 | 1204.81 | 1203.42 | 8856    | 2   | 1642.3                                                             | 88.9 | 10 | K.VSELKEELKK.R                          |
| HsF-IP-293-MG_Ti_105.17f  | 4.4598 | 0.3869 | 3127.32 | 3128.31 | 6481    | 1   | 1022.5                                                             | 29.8 | 5  | R.LQAALDDEEAGGRPAMEPGNGSLDLGGDSAGR.S    |
| HsFLAG-Control_HeLa_NE    | 3.7425 | 0.3796 | 1716.91 | 1715.95 | 5707.3  | 1   | 782.8                                                              | 52.9 | 25 | K.SSGPSTSLFAVTVAPPGAR.Q                 |
| HsHeLa_Control-MG_Ti_20   | 4.2753 | 0.3828 | 1667.43 | 1667.78 | 4910.5  | 1   | 629.8                                                              | 57.9 | 2  | K.KAEGGGGGGRPGAPAAGDGK.T                |
| HsHeLa_Control-MG_Ti_10   | 3.9062 | 0.3406 | 2153.67 | 2154.3  | 4711.3  | 1   | 466.3                                                              | 45.7 | 2  | K.KAEGGGGGGRPGAPAAGDGKTEQK.G            |
| HsHeLa_Control-MG_Ti_10   | 3.3363 | 0.3618 | 2025.77 | 2026.13 | 4687.9  | 2   | 333.4                                                              | 38.6 | 2  | K.AEGGGGGGRPGAPAAGDGKTEQK.G             |
| Hs293FLP_TREX_Ti_102.1    | 2.8767 | 0.2358 | 1291.35 | 1292.39 | 6870.2  | 2   | 645.9                                                              | 66.7 | 2  | R.GYFEYIEENK.Y                          |
| Hs293FLP-MG_Ti_202.246    | 3.04   | 0.1985 | 1291.43 | 1292.39 | 11084.1 | 9   | 768.7                                                              | 61.1 | 1  | R.GYFEYIEENK.Y                          |
| Hs293FLP-MG_Ti_102.236    | 2.5721 | 0.3291 | 1291.43 | 1292.39 | 7214.4  | 9   | 457.2                                                              | 55.6 | 2  | R.GYFEYIEENK.Y                          |
| HsHeLa_Control-MG_Ti_20   | 2.749  | 0.1121 | 1291.44 | 1292.39 | 7730.2  | 4   | 713.8                                                              | 66.7 | 2  | R.GYFEYIEENK.Y                          |
| Hs283FLP_Ti_102.1985.19   | 3.1821 | 0.2169 | 1291.48 | 1292.39 | 6858.4  | 6   | 567.6                                                              | 66.7 | 2  | R.GYFEYIEENK.Y                          |
| HsHeLa_Control_Ti_102.21  | 3.0385 | 0.2029 | 1291.55 | 1292.39 | 7051.6  | 2   | 631.3                                                              | 66.7 | 1  | R.GYFEYIEENK.Y                          |
| HsHeLa_Control-MG_Ti_10   | 2.9665 | 0.3189 | 1291.57 | 1292.39 | 5600.2  | 8   | 406.3                                                              | 61.1 | 2  | R.GYFEYIEENK.Y                          |
| HsHeLa3_Ti_103.2074.207   | 2.7078 | 0.1868 | 1291.6  | 1292.39 | 6982.5  | 8   | 537.7                                                              | 61.1 | 1  | R.GYFEYIEENK.Y                          |
| Hs293FLP_Ti_302.2063.20   | 3.0591 | 0.2034 | 1291.63 | 1292.39 | 6423.6  | 4   | 564                                                                | 66.7 | 2  | R.GYFEYIEENK.Y                          |
| Hs293FLP_TREX_Ti_102.1    | 4.127  | 0.3764 | 1291.84 | 1292.39 | 7930.9  | 1   | 1378.8                                                             | 83.3 | 4  | R.GYFEYIEENK.Y                          |
| HsF-IP-293_Ti_102.1815.1f | 3.9319 | 0.3396 | 1292.11 | 1292.39 | 8835.8  | 1   | 1491                                                               | 83.3 | 4  | R.GYFEYIEENK.Y                          |
| Hs293FLP-MG_Ti_202.246    | 4.216  | 0.3211 | 1292.4  | 1292.39 | 7891.5  | 1   | 1276.2                                                             | 83.3 | 1  | R.GYFEYIEENK.Y                          |
| HsHeLa_Control_Ti_102.21  | 4.119  | 0.3647 | 1292.41 | 1292.39 | 7406.4  | 1   | 1411.9                                                             | 83.3 | 3  | R.GYFEYIEENK.Y                          |
| Hs293FLP-MG_Ti_102.236    | 4.2724 | 0.2835 | 1292.59 | 1292.39 | 7393.2  | 1   | 1321.7                                                             | 83.3 | 3  | R.GYFEYIEENK.Y                          |
| HsF-IP-293-MG_Ti_102.19f  | 4.1818 | 0.3727 | 1293.23 | 1292.39 | 7184.8  | 1   | 1355                                                               | 83.3 | 5  | R.GYFEYIEENK.Y                          |
| HsHeLa3_Ti_102.2177.217   | 3.7851 | 0.3449 | 1293.45 | 1292.39 | 7620.7  | 1   | 1359.3                                                             | 83.3 | 1  | R.GYFEYIEENK.Y                          |
| HsHeLa_Control-MG_Ti_10   | 4.1738 | 0.3325 | 1293.82 | 1292.39 | 7642.6  | 1   | 1411                                                               | 83.3 | 3  | R.GYFEYIEENK.Y                          |
| Hs283FLP_Ti_102.1978.19   | 4.2509 | 0.3298 | 1294.07 | 1292.39 | 7551.1  | 1   | 1363.6                                                             | 83.3 | 3  | R.GYFEYIEENK.Y                          |
| Hs293FLP-MG_Ti_205.214    | 2.8502 | 0.2793 | 1698.44 | 1698.83 | 10672.4 | 1   | 1051.1                                                             | 66.7 | 1  | R.GYFEYIEENKYSR.A                       |
| Hs293FLP-MG_Ti_204.294    | 5.4064 | 0.388  | 3639.06 | 3637.78 | 6667    | 1   | 756.2                                                              | 28.4 | 23 | K.SPQPPVEEEDHFDTTVCLDTYNCDLHFK.I        |
| HsHeLa3_Ti_106.3246.324   | 4.9886 | 0.3563 | 2033.7  | 2032.32 | 9191.6  | 1   | 2219.1                                                             | 63.9 | 3  | R.LSASLTMESFAFLWAGGR.A                  |
| Hs293FLP-MG_Ti_202.181    | 1.9633 | 0.1137 | 996.52  | 997.096 | 3370.9  | 9   | 362.7                                                              | 71.4 | 1  | K.DIDIHEVR.I                            |
| Hs293FLP-MG_Ti_103.151    | 2.9258 | 0.0852 | 997.58  | 997.096 | 5546.9  | 3   | 943.1                                                              | 85.7 | 2  | K.DIDIHEVR.I                            |
|                           |        |        |         |         |         |     |                                                                    |      |    | K.TCNCETEDYGEKFDENDVITCFANFESDEVELSYAK. |
| HsHeLa_Control-MG_Ti_20   | 6.4821 | 0.486  | 4331.3  | 4331.41 | 11204.4 | 1   | 1389.6                                                             | 26.4 | 16 | N                                       |
| Hs293FLP-MG_Ti_205.405    | 4.5498 | 0.4245 | 2843.75 | 2843.98 | 9317.3  | 1   | 834.6                                                              | 30.4 | 1  | K.FDENDVITCFANFESDEVELSYAK.N            |
| HsHeLa_Control-MG_Ti_20   | 4.8945 | 0.3959 | 2844.27 | 2843.98 | 10254.7 | 1   | 1234                                                               | 45.7 | 24 | K.FDENDVITCFANFESDEVELSYAK.N            |
| Hs293FLP-MG_Ti_202.200    | 3.3884 | 0.2424 | 1049.12 | 1049.17 | 7509.3  | 1   | 1133.1                                                             | 88.9 | 2  | K.NGQDLGVAFK.I                          |
| Hs293FLP-MG_Ti_202.200    | 2.3829 | 0.2893 | 1049.52 | 1049.17 | 4569.3  | 5   | 244.1                                                              | 61.1 | 2  | K.NGQDLGVAFK.I                          |
| HsHeLa_Control-MG_Ti_10   | 3.1491 | 0.2973 | 1049.57 | 1049.17 | 6408.2  | 1   | 967.3                                                              | 83.3 | 4  | K.NGQDLGVAFK.I                          |
| HsGST-MOCK_Ti_106.239     | 3.563  | 0.3934 | 2416.03 | 2415.69 | 8091.6  | 1   | 1450.8                                                             | 38.2 | 1  | R.PLFPHVLCHNCAVEFNFGQK.E                |
| HsHeLa_Control-MG_Ti_20   | 2.7708 | 0.1698 | 2724.52 | 2726.06 | 4328    | 1   | 410                                                                | 45.2 | 1  | K.EKPYFPIPEEYTFIQNVPLEDR.V              |
| Hs293FLP-MG_Ti_203.367    | 2.7874 | 0.1797 | 2726.08 | 2726.06 | 5002.8  | 1   | 421.7                                                              | 42.9 | 1  | K.EKPYFPIPEEYTFIQNVPLEDR.V              |
| Hs293FLP-MG_Ti_205.339    | 5.1679 | 0.3486 | 2726.46 | 2726.06 | 7800    | 1   | 1035                                                               | 36.9 | 5  | K.EKPYFPIPEEYTFIQNVPLEDR.V              |
| HsHeLa_Control-MG_Ti_20   | 5.7    | 0.2332 | 2727.21 | 2726.06 | 6750.4  | 1   | 1538.3                                                             | 42.9 | 12 | K.EKPYFPIPEEYTFIQNVPLEDR.V              |
| HsFLAG-Control_HeLa_NE    | 5.1043 | 0.2648 | 2727.6  | 2726.06 | 8757.3  | 1   | 1221                                                               | 36.9 | 9  | K.EKPYFPIPEEYTFIQNVPLEDR.V              |
| HsHeLa_Control_Ti_103.36  | 4.9563 | 0.4235 | 2468.94 | 2468.77 | 4345.2  | 1   | 847                                                                | 57.9 | 27 | K.PYFPIPEEYTFIQNVPLEDR.V                |
| HsHeLa_Control-MG_Ti_10   | 5.0575 | 0.3561 | 1705.89 | 1706.04 | 5749.2  | 1   | 1884                                                               | 80   | 10 | K.KDCEVMMIGLPGAGK.T                     |
| HsHeLa3_Ti_103.2868.286   | 3.0346 | 0.3574 | 1577.64 | 1577.86 | 6662.1  | 1   | 774.6                                                              | 57.1 | 3  | K.DCEVMMIGLPGAGK.T                      |
| HsHeLa3_Ti_103.2866.286   | 4.0198 | 0.2727 | 1578.57 | 1577.86 | 6284.8  | 1   | 1534.2                                                             | 71.4 | 4  | K.DCEVMMIGLPGAGK.T                      |
| HsHeLa3_Ti_103.2174.217   | 3.7587 | 0.2331 | 1383.4  | 1383.6  | 4609.5  | 1   | 1426.1                                                             | 86.4 | 14 | K.YNILGTNTIMDK.M                        |

|                          |        |        |         |         |         |     |        |      |                                            |
|--------------------------|--------|--------|---------|---------|---------|-----|--------|------|--------------------------------------------|
| Hs293FLP-MG_Ti_103.173   | 2.0434 | 0.1715 | 783.81  | 784.022 | 7243.9  | 2   | 725.3  | 83.3 | 3 K.MMVAGFK.K                              |
| Hs283FLP_Ti_103.1494.14  | 2.2845 | 0.1199 | 819.65  | 819.979 | 4092.1  | 3   | 450.5  | 83.3 | 3 K.FIEIAAR.K                              |
| HsGST-MOCK_Ti_102.159    | 5.0237 | 0.3539 | 1804.62 | 1805    | 4413.9  | 1   | 1134   | 80   | 13 K.RNFILDQTNVSAQAQR.R                    |
| HsFLAG-Control_HeLa_NE   | 5.1378 | 0.3582 | 1648.42 | 1648.82 | 7710.9  | 1   | 3208.1 | 89.3 | 21 R.NFILDQTNVSAQAQR.R                     |
| HsHeLa_Control-MG_Ti_10  | 3.257  | 0.2808 | 1130.67 | 1130.32 | 4873.4  | 1   | 1226.8 | 93.8 | 9 K.MCLFAGFQR.K                            |
| HsHeLa_Control-MG_Ti_10  | 2.012  | 0.1156 | 772.82  | 772.929 | 5737.5  | 9   | 555.7  | 75   | 2 K.AVVVCPK.D                              |
| Hs293FLP_Ti_303.1293.12  | 3.2142 | 0.2915 | 1423.61 | 1423.57 | 5262.4  | 1   | 968.1  | 77.3 | 4 K.AVVVCPKDEDYK.Q                         |
| HsHeLa_Control-MG_Ti_20  | 4.1405 | 0.3942 | 1763.63 | 1764.03 | 7697.4  | 1   | 1140.1 | 63.3 | 2 K.KAEVEGKDLPEHAVLK.M                     |
| Hs293FLP-MG_Ti_205.156   | 5.0793 | 0.4086 | 1763.67 | 1764.03 | 8951.3  | 1   | 1563   | 66.7 | 1 K.KAEVEGKDLPEHAVLK.M                     |
| Hs293FLP-MG_Ti_205.156   | 5.3414 | 0.2418 | 1764.14 | 1764.03 | 6585    | 1   | 2048.6 | 56.7 | 1 K.KAEVEGKDLPEHAVLK.M                     |
| HsHeLa_Control-MG_Ti_20  | 3.5373 | 0.1138 | 1764.4  | 1764.03 | 7882.8  | 2   | 1083.4 | 41.7 | 1 K.KAEVEGKDLPEHAVLK.M                     |
| HsHeLa_Control-MG_Ti_20  | 2.0396 | 0.2094 | 1021.4  | 1022.19 | 4556.9  | 3   | 405.4  | 62.5 | 1 K.DLPEHAVLK.M                            |
| Hs293FLP-MG_Ti_205.426   | 4.2451 | 0.431  | 2603.19 | 2603.85 | 5708.4  | 1   | 720.6  | 34.5 | 3 K.GNFTLPEVAECFDEITYVELQK.E               |
| Hs283FLP_Ti_106.2919.29  | 4.9586 | 0.5231 | 2603.41 | 2603.85 | 6185.4  | 1   | 1380.9 | 59.5 | 26 K.GNFTLPEVAECFDEITYVELQK.E              |
| HsHeLa_Control-MG_Ti_20  | 3.8181 | 0.3042 | 3187.83 | 3189.47 | 6842.7  | 1   | 651    | 38.5 | 10 K.GNFTLPEVAECFDEITYVELQKEEAQK.L         |
| HsHeLa_Control-MG_Ti_10  | 2.7595 | 0.1518 | 1266.64 | 1267.42 | 6576.1  | 7   | 560.5  | 61.1 | 2 K.LLEQYKEESK.K                           |
| Hs283FLP_Ti_103.1263.12  | 3.1573 | 0.1517 | 1266.64 | 1267.42 | 6508.3  | 2   | 674    | 72.2 | 1 K.LLEQYKEESK.K                           |
| HsHeLa_Control-MG_Ti_20  | 3.4914 | 0.2436 | 1267.33 | 1267.42 | 7614.3  | 1   | 1334.4 | 88.9 | 4 K.LLEQYKEESK.K                           |
| Hs293FLP-MG_Ti_203.149   | 3.5304 | 0.2609 | 1267.49 | 1267.42 | 7320.6  | 2   | 1238.7 | 83.3 | 2 K.LLEQYKEESK.K                           |
| Hs293FLP-MG_Ti_203.149   | 2.8656 | 0.1645 | 1267.53 | 1267.42 | 7519.5  | 2   | 611.1  | 66.7 | 1 K.LLEQYKEESK.K                           |
| Hs293FLP-MG_Ti_103.138   | 3.9008 | 0.1988 | 1267.91 | 1267.42 | 6796.9  | 2   | 1237.3 | 88.9 | 10 K.LLEQYKEESK.K                          |
| Hs293FLP_TREX_Ti_104.1   | 4.1162 | 0.2288 | 1395.55 | 1395.6  | 9590    | 1   | 1407.2 | 80   | 8 K.LLEQYKEESK.A                           |
| Hs293FLP-MG_Ti_104.215   | 4.7149 | 0.396  | 2212.95 | 2213.33 | 8653    | 1   | 1118.6 | 55.9 | 15 K.NQSQGYNQWQQGFQWQK.P                   |
| HsF-IP-293-MG_Ti_103.19  | 5.1759 | 0.3691 | 2213.35 | 2213.33 | 9114.5  | 1   | 2530.1 | 47.1 | 3 K.NQSQGYNQWQQGFQWQK.P                    |
| HsF-IP-293-MG_Ti_103.19  | 4.7816 | 0.3407 | 2214.27 | 2213.33 | 10143.6 | 1   | 1627.2 | 61.8 | 14 K.NQSQGYNQWQQGFQWQK.P                   |
| HsHeLa3_Ti_106.2052.205  | 1.9245 | 0.3063 | 1465.52 | 1466.56 | 6109.5  | 3   | 308.2  | 50   | 1 K.PWSQHYHQGY.-                           |
| HsHeLa_Control-MG_Ti_10  | 2.9373 | 0.4155 | 1465.55 | 1466.56 | 5204.7  | 1   | 563.8  | 65   | 1 K.PWSQHYHQGY.-                           |
| Hs283FLP_Ti_106.1960.19  | 2.7555 | 0.3079 | 1465.61 | 1466.56 | 5258.6  | 1   | 547.7  | 65   | 1 K.PWSQHYHQGY.-                           |
| Hs293FLP_Ti_306.2339.23  | 2.2248 | 0.3076 | 1465.81 | 1466.56 | 4624.2  | 1   | 385.1  | 55   | 1 K.PWSQHYHQGY.-                           |
| Hs283FLP_Ti_106.1961.19  | 3.5593 | 0.3783 | 1466.53 | 1466.56 | 6642.4  | 1   | 863.3  | 75   | 1 K.PWSQHYHQGY.-                           |
| HsHeLa_Control-MG_Ti_10  | 3.5408 | 0.3313 | 1466.72 | 1466.56 | 7113.1  | 1   | 879.4  | 70   | 2 K.PWSQHYHQGY.-                           |
| HsHeLa3_Ti_106.2040.204  | 3.0972 | 0.2061 | 1466.97 | 1466.56 | 7988.7  | 1   | 1240.7 | 80   | 2 K.PWSQHYHQGY.-                           |
| Hs293FLP_Ti_306.2338.23  | 3.258  | 0.2866 | 1467.49 | 1466.56 | 6890    | 1   | 756.5  | 70   | 3 K.PWSQHYHQGY.-                           |
| gi 33286418 ref          | 24     | 84     | 0.49    | 531     | 57937   | 7.8 | U      |      | pyruvate kinase 3 isoform 1 [Homo sapiens] |
| HsFLAG-Control_293_Ti_20 | 2.3982 | 0.1991 | 1359.56 | 1360.52 | 3229.2  | 6   | 121.5  | 54.2 | 1 R.NTGIICTIGPASR.S                        |
| HsFLAG-Control_MG_293_   | 4.0255 | 0.423  | 1360.02 | 1360.52 | 8653.2  | 1   | 1697.2 | 79.2 | 7 R.NTGIICTIGPASR.S                        |
| Hs293FLP_TREX_Ti_103.1   | 4.3777 | 0.379  | 1360.53 | 1360.52 | 7199.6  | 1   | 1466.6 | 79.2 | 7 R.NTGIICTIGPASR.S                        |
| HsHeLa_Control-MG_Ti_10  | 4.3449 | 0.3785 | 1886.31 | 1885.05 | 7791.9  | 1   | 1114.8 | 60   | 2 R.LNFSHGTHEYHAETIK.N                     |
| Hs293FLP-MG_Ti_203.329   | 3.5234 | 0.3518 | 2466.02 | 2466.79 | 7016.6  | 1   | 744.4  | 30.7 | 1 R.TATESFASDPILYRPVAVALDTK.G              |
| HsHeLa_Control_Ti_103.31 | 3.7761 | 0.3277 | 2466.48 | 2466.79 | 3598.2  | 1   | 341.2  | 40.9 | 3 R.TATESFASDPILYRPVAVALDTK.G              |
| HsHeLa_Control-MG_Ti_20  | 3.591  | 0.2193 | 2467.5  | 2466.79 | 7178.6  | 1   | 983.8  | 33   | 1 R.TATESFASDPILYRPVAVALDTK.G              |
| Hs293FLP_Ti_303.2873.28  | 3.4613 | 0.3052 | 2467.89 | 2466.79 | 3557    | 1   | 313.2  | 40.9 | 2 R.TATESFASDPILYRPVAVALDTK.G              |
| HsFLAG-Control_Hela_Ti_1 | 3.0361 | 0.2205 | 990.83  | 991.086 | 3929.7  | 1   | 749.9  | 83.3 | 1 K.GSGTAEVELK.K                           |
| HsHeLa_Control-MG_Ti_10  | 3.9352 | 0.2636 | 1469.43 | 1469.6  | 5656.1  | 1   | 976.5  | 80   | 1 K.CDENILWLDYK.N                          |
| HsHeLa_Control-MG_Ti_10  | 2.4999 | 0.3242 | 1462.77 | 1463.71 | 5926.6  | 1   | 659.3  | 58.3 | 1 K.IYVDDGLISLQVK.Q                        |
| HsFLAG-Control_HeLa_S10  | 4.1166 | 0.2629 | 1463.77 | 1463.71 | 10472.4 | 2   | 2258.6 | 83.3 | 4 K.IYVDDGLISLQVK.Q                        |
| HsHeLa_Control-MG_Ti_10  | 4.6588 | 0.3686 | 1463.85 | 1463.71 | 7271.8  | 1   | 2519.5 | 91.7 | 2 K.IYVDDGLISLQVK.Q                        |
| Hs293FLP-MG_Ti_202.304   | 4.9547 | 0.3263 | 1780.64 | 1780.93 | 7725    | 1   | 1531.4 | 64.7 | 7 K.GADFLVTEVENGGSLGSK.K                   |
| HsHeLa_Control-MG_Ti_10  | 5.3421 | 0.443  | 1766.03 | 1766.05 | 4302.5  | 1   | 930.4  | 67.6 | 12 K.KGVNLPAAVDLPAVSEK.D                   |

|                   |                          |        |        |         |         |         |   |                                               |      |    |                                        |
|-------------------|--------------------------|--------|--------|---------|---------|---------|---|-----------------------------------------------|------|----|----------------------------------------|
|                   | HsFLAG-Control_HeLa_S1(  | 5.4174 | 0.4441 | 1639.21 | 1637.87 | 4697.5  | 1 | 1201.1                                        | 78.1 | 5  | K.GVNLPGAAVDLPVASEK.D                  |
|                   | HsHeLa3_Ti_105.4487.448  | 2.5804 | 0.4226 | 1860.64 | 1861.12 | 7324.9  | 1 | 784.8                                         | 56.7 | 1  | K.FGVEQDVDMVFASFIR.K                   |
|                   | HsHeLa3_Ti_102.1989.198  | 2.5626 | 0.1797 | 1142.65 | 1142.29 | 4023    | 1 | 464                                           | 65   | 1  | R.GDLGIEIPAEEK.V                       |
|                   | HsHeLa3_Ti_106.2763.276  | 3.1805 | 0.434  | 1879.44 | 1878.26 | 5230.1  | 1 | 927.6                                         | 62.5 | 1  | R.AGKPVICATQMLESMIK.K                  |
|                   | HsHeLa3_Ti_103.3842.384  | 4.8198 | 0.3904 | 3498.36 | 3496.79 | 5418.8  | 1 | 707.5                                         | 26.5 | 2  | R.AEGSDVANAVLDGADCIMLSGETAKGDYPLEAVR.M |
| *                 | HsHeLa_Control-MG_Ti_20  | 4.1018 | 0.4534 | 1932.66 | 1933.17 | 7261.9  | 1 | 1326.4                                        | 70   | 1  | R.EEAAIYHLQLFEELR.R                    |
| *                 | HsFLAG-Control_Hela_Ti_1 | 5.151  | 0.4713 | 2175.79 | 2176.43 | 5558    | 1 | 1212.3                                        | 61.9 | 17 | R.LAPITSDPTEATAVGAVEASF.K              |
|                   | HsFLAG-Control_293_Ti_2( | 1.848  | 0.0898 | 840.43  | 841.041 | 3488.3  | 2 | 200.6                                         | 64.3 | 1  | R.APIAVTR.N                            |
|                   | HsFLAG-Control_HeLa_S1(  | 4.3487 | 0.3263 | 1644.51 | 1643.75 | 6866    | 1 | 1542.4                                        | 76.9 | 3  | K.DPVQEAWAEDVDLR.V                     |
| gi 4506701 ref NF | 6                        | 11     | 0.49   | 143     | 15808   | 10.5    | U | ribosomal protein S23 [Homo sapiens]          |      |    |                                        |
| *                 | Hs293FLP_Ti_305.1221.12  | 2.0585 | 0.1282 | 810.68  | 810.972 | 4541.7  | 1 | 471.6                                         | 71.4 | 2  | K.AHLGTALK.A                           |
| *                 | HsHeLa_Control-MG_Ti_20  | 2.5683 | 0.192  | 1056.52 | 1057.15 | 3933.5  | 1 | 451.8                                         | 65   | 2  | K.ANPFGGASHAK.G                        |
|                   | HsGST-MOCK_Ti_405.401    | 4.5054 | 0.2742 | 3128.42 | 3126.46 | 9924.3  | 1 | 1001.1                                        | 28.7 | 1  | K.KITAFVNDGCLNFIENDEVLVAGFGR.K         |
|                   | HsGST-MOCK_Ti_105.136    | 3.6945 | 0.3876 | 1207.78 | 1206.39 | 5559.8  | 1 | 1091.6                                        | 81.8 | 4  | R.KGHAVGDIPGVR.F                       |
|                   | HsHeLa_Control-MG_Ti_20  | 2.9965 | 0.2963 | 1078.39 | 1078.22 | 4712.1  | 1 | 581.2                                         | 70   | 1  | K.GHAVGDIPGVR.F                        |
|                   | HsFLAG-Control_MG_293_   | 2.6733 | 0.1319 | 1190.58 | 1191.46 | 8571.5  | 8 | 676                                           | 65   | 1  | K.VANVSLALYK.G                         |
| gi 5031635 ref NF | 9                        | 30     | 0.488  | 166     | 18502   | 8.1     | U | cofilin 1 (non-muscle) [Homo sapiens]         |      |    |                                        |
| *                 | Hs293FLP_TREX_Ti_104.2   | 2.7828 | 0.2517 | 1183.2  | 1182.33 | 5858.8  | 1 | 856.6                                         | 77.8 | 3  | K.AVLFCLSEDK.K                         |
| *                 | Hs293FLP_TREX_Ti_104.1   | 3.0748 | 0.3602 | 1311.32 | 1310.5  | 7320.5  | 1 | 853.2                                         | 70   | 1  | K.AVLFCLSEDK.N                         |
| *                 | HsFLAG-Control_HeLa_NE   | 1.9629 | 0.1058 | 915.62  | 916.062 | 5822    | 7 | 425.8                                         | 71.4 | 1  | K.NIILEEGK.E                           |
| *                 | HsFLAG-MOCK_300mM_T      | 5.4778 | 0.2892 | 3065.53 | 3064.46 | 11813.5 | 1 | 1228.2                                        | 26.9 | 3  | K.NIILEEGKEILVGDVGQTVDDPYATFVK.M       |
| *                 | HsFLAG-Control_HeLa_S1(  | 5.7222 | 0.4867 | 2167.17 | 2167.42 | 6948.5  | 1 | 1966.3                                        | 68.4 | 11 | K.EILVGDVGQTVDDPYATFVK.M               |
|                   | HsHeLa_Control-MG_Ti_20  | 2.0894 | 0.2159 | 1337.29 | 1338.46 | 6860.2  | 1 | 421.3                                         | 55   | 2  | R.YALYDATYETK.E                        |
|                   | HsHeLa_Control_Ti_102.17 | 3.658  | 0.2187 | 1338.44 | 1338.46 | 5164.4  | 1 | 1292.9                                        | 90   | 1  | R.YALYDATYETK.E                        |
|                   | HsHeLa_Control-MG_Ti_20  | 5.4254 | 0.3379 | 1990.65 | 1991.34 | 7681.4  | 1 | 2123                                          | 75   | 5  | K.KEDLVFIFWAPESAPLK.S                  |
|                   | HsFLAG-Control_Hela_Ti_1 | 4.2464 | 0.2505 | 1341.09 | 1341.59 | 4564.9  | 1 | 964.5                                         | 73.1 | 3  | K.LGGSAVISLEGKPL.-                     |
| gi 20270371 ref N | 31                       | 255    | 0.486  | 245     | 28048   | 7.2     | U | hypothetical protein LOC134147 [Homo sapiens] |      |    |                                        |
| *                 | HsFLAG-Control_HeLa_NE   | 2.2226 | 0.0979 | 981.59  | 982.125 | 4547.5  | 2 | 385.7                                         | 71.4 | 2  | R.EVQVEHIK.A                           |
| *                 | HsFLAG-MOCK_300mM_T      | 4.8983 | 0.413  | 1970.96 | 1971.31 | 5103.5  | 1 | 1232.4                                        | 68.8 | 22 | K.AVIVIQDIFGWQLPNTR.Y                  |
| *                 | HsFLAG-Control_HeLa_S1(  | 5.1553 | 0.2805 | 1971    | 1971.31 | 6854.5  | 1 | 1928.2                                        | 51.6 | 1  | K.AVIVIQDIFGWQLPNTR.Y                  |
| *                 | HsFLAG-Control_HeLa_S1(  | 5.3027 | 0.3622 | 1972.02 | 1971.31 | 6306    | 1 | 1485                                          | 71.9 | 61 | K.AVIVIQDIFGWQLPNTR.Y                  |
| *                 | HsFLAG-Control_HeLa_S1(  | 3.3402 | 0.203  | 993.1   | 993.191 | 4979    | 1 | 1136.9                                        | 88.9 | 8  | R.AGVSVMGIVK.D                         |
| *                 | HsFlag1P_Ti_105.3227.322 | 5.6314 | 0.4223 | 2071.17 | 2071.34 | 9233.8  | 1 | 2059.9                                        | 63.9 | 8  | R.AGVSVMGIVKDSEDIYNLK.N                |
| *                 | HsHeLa-FLAG-IP_S100_Ti_  | 2.6938 | 0.1985 | 1096.33 | 1097.17 | 5282    | 2 | 581.5                                         | 75   | 1  | K.DSEDIYNLK.N                          |
| *                 | HsFLAG-Control_HeLa_S1(  | 2.3984 | 0.1589 | 1096.47 | 1097.17 | 7609.8  | 3 | 736.5                                         | 75   | 1  | K.DSEDIYNLK.N                          |
| *                 | HsFLAG-Control_HeLa_S1(  | 2.9119 | 0.2764 | 1096.49 | 1097.17 | 7648.4  | 1 | 773.2                                         | 75   | 2  | K.DSEDIYNLK.N                          |
| *                 | HsHeLa_Control_Ti_102.16 | 2.8039 | 0.2064 | 1096.6  | 1097.17 | 5450.4  | 4 | 584.2                                         | 75   | 3  | K.DSEDIYNLK.N                          |
| *                 | HsFLAG-Control_HeLa_S1(  | 2.6686 | 0.2266 | 1096.63 | 1097.17 | 6510.5  | 8 | 716.9                                         | 75   | 1  | K.DSEDIYNLK.N                          |
| *                 | HsFLAG-Control_HeLa_S1(  | 3.6667 | 0.2277 | 1096.68 | 1097.17 | 5893.3  | 4 | 890.4                                         | 81.2 | 1  | K.DSEDIYNLK.N                          |
| *                 | HsHeLa-FLAG-IP_S100_Ti_  | 3.0325 | 0.265  | 1097.04 | 1097.17 | 5973.2  | 2 | 854.1                                         | 81.2 | 2  | K.DSEDIYNLK.N                          |
| *                 | HsFLAG-Control_HeLa_NE   | 2.8827 | 0.1964 | 1097.2  | 1097.17 | 6500.1  | 1 | 873                                           | 81.2 | 2  | K.DSEDIYNLK.N                          |
| *                 | HsFLAG-Control_HeLa_S1(  | 3.3657 | 0.2899 | 1097.29 | 1097.17 | 5465.6  | 2 | 913.6                                         | 81.2 | 2  | K.DSEDIYNLK.N                          |
| *                 | HsFLAG-Control_HeLa_S1(  | 5.6934 | 0.3708 | 1932.81 | 1931.28 | 5575.4  | 1 | 1607.2                                        | 75   | 86 | K.NPTLFIFAENDVVIPLK.D                  |
| *                 | HsFLAG-Control_HeLa_S1(  | 5.5231 | 0.3683 | 2816.4  | 2816.31 | 5945.4  | 1 | 1325.6                                        | 36.5 | 8  | K.NPTLFIFAENDVVIPLKDVSLLTQK.L          |
| *                 | HsHeLa_Control-MG_Ti_20  | 2.6136 | 0.1982 | 903.46  | 904.051 | 4029.7  | 3 | 414.6                                         | 78.6 | 10 | K.DVSLLTQK.L                           |
| *                 | HsFLAG-MOCK_300mM_T      | 3.54   | 0.2833 | 1576.49 | 1575.81 | 9405.2  | 1 | 1117.2                                        | 72.7 | 1  | K.LKEHCKVEYQIK.T                       |
| *                 | HsHeLa_Control-MG_Ti_20  | 2.0966 | 0.2532 | 1373.52 | 1374.5  | 3234.8  | 2 | 119.8                                         | 40.9 | 1  | K.TFSGQTHGFVHR.K                       |
| *                 | HsFLAG-Control_HeLa_NE   | 2.303  | 0.2285 | 1373.66 | 1374.5  | 6172.5  | 3 | 317.8                                         | 54.5 | 1  | K.TFSGQTHGFVHR.K                       |

|                   |                          |        |        |         |         |        |   |        |      |    |                                                                   |
|-------------------|--------------------------|--------|--------|---------|---------|--------|---|--------|------|----|-------------------------------------------------------------------|
| *                 | HsFLAG-Control_HeLa_S1(  | 2.5667 | 0.3678 | 1373.77 | 1374.5  | 5823.9 | 1 | 369    | 59.1 | 2  | K.TFSGQTHGFVHR.K                                                  |
| *                 | HsFLAG-Control_HeLa_S1(  | 3.9357 | 0.5195 | 1373.86 | 1374.5  | 9952.6 | 1 | 1942.9 | 81.8 | 9  | K.TFSGQTHGFVHR.K                                                  |
| *                 | HsFLAG-Control_HeLa_NE   | 3.7551 | 0.4253 | 1374.48 | 1374.5  | 8585.3 | 1 | 1171.5 | 68.2 | 6  | K.TFSGQTHGFVHR.K                                                  |
| *                 | HsFLAG-Control_HeLa_S1(  | 2.8387 | 0.2571 | 1374.65 | 1374.5  | 5625.5 | 1 | 367.2  | 59.1 | 1  | K.TFSGQTHGFVHR.K                                                  |
| *                 | HsFLAG-Control_HeLa_S1(  | 3.6607 | 0.4101 | 1374.84 | 1374.5  | 8604.2 | 1 | 1167.1 | 68.2 | 2  | K.TFSGQTHGFVHR.K                                                  |
| *                 | Hs293FLP_Ti_306.2258.22  | 3.3587 | 0.3911 | 1376.61 | 1374.5  | 6858.4 | 1 | 1024.1 | 72.7 | 1  | K.TFSGQTHGFVHR.K                                                  |
| *                 | HsFLAG-Control_Hela_Ti_1 | 3.8805 | 0.2527 | 2050.91 | 2051.19 | 4996   | 1 | 406.6  | 50   | 5  | R.KREDCSPADKPYIDEAR.R                                             |
| *                 | HsHeLa_Control-MG_Ti_20  | 4.1386 | 0.2636 | 2051.4  | 2051.19 | 5797.2 | 4 | 1223.3 | 48.4 | 2  | R.KREDCSPADKPYIDEAR.R                                             |
| *                 | HsFLAG-Control_HeLa_S1(  | 3.3092 | 0.3123 | 1767.3  | 1766.83 | 6502.7 | 1 | 935.1  | 64.3 | 1  | R.EDCSPADKPYIDEAR.R                                               |
| *                 | HsHeLa_Control-MG_Ti_20  | 3.3368 | 0.1183 | 1186.22 | 1186.4  | 6408.5 | 7 | 881.1  | 81.2 | 2  | R.RNLIEWLNK.Y                                                     |
| gi 4503471 ref NF |                          | 57     | 295    | 0.485   | 462     | 50141  | 9 | U      |      |    | eukaryotic translation elongation factor 1 alpha 1 [Homo sapiens] |
|                   | HsGST-MOCK_Ti_105.161(   | 5.0627 | 0.3697 | 1589.75 | 1589.84 | 7575.5 | 1 | 2410.8 | 82.1 | 28 | K.THINIVVIGHVDSGK.S                                               |
|                   | HsHeLa_Control-MG_Ti_20  | 2.1168 | 0.0805 | 1120.6  | 1121.28 | 4071.8 | 2 | 445.4  | 66.7 | 1  | K.STTTGHLIYK.C                                                    |
|                   | HsFLAG-Control_HeLa_NE   | 3.2571 | 0.3469 | 1121.08 | 1121.28 | 8100.5 | 1 | 1088.6 | 72.2 | 19 | K.STTTGHLIYK.C                                                    |
|                   | HsFLAG-Control_293_Ti_2( | 3.0545 | 0.334  | 1121.22 | 1121.28 | 8815.4 | 1 | 1167   | 77.8 | 9  | K.STTTGHLIYK.C                                                    |
|                   | HsFLAG-Control_MG_293_   | 3.8503 | 0.3494 | 1405.35 | 1405.6  | 6125.7 | 1 | 986    | 72.7 | 62 | K.YYVTIIDAPGHR.D                                                  |
| *                 | HsFLAG-MOCK_300mM_T      | 3.9997 | 0.3257 | 1909.83 | 1909.2  | 4709.1 | 1 | 633.2  | 60   | 1  | K.YYVTIIDAPGHRDFIK.N                                              |
|                   | HsGST-MOCK_Ti_102.404(   | 3.739  | 0.3542 | 2910.16 | 2911.26 | 7190.7 | 1 | 546.8  | 32.1 | 2  | K.NMITGTSQADCAVLIVAAGVGEFEAGISK.N                                 |
|                   | HsGST-MOCK_Ti_303.534(   | 4.7274 | 0.3861 | 2912.77 | 2911.26 | 8229.7 | 1 | 1623.9 | 33   | 4  | K.NMITGTSQADCAVLIVAAGVGEFEAGISK.N                                 |
|                   | HsGST-MOCK_Ti_405.245(   | 2.884  | 0.275  | 1314.28 | 1315.56 | 3797.5 | 1 | 422.1  | 63.6 | 2  | R.EHALLAYTLGVK.Q                                                  |
|                   | Hs293FLP-MG_Ti_204.231(  | 3.1474 | 0.3715 | 1314.52 | 1315.56 | 6113   | 1 | 627.9  | 63.6 | 1  | R.EHALLAYTLGVK.Q                                                  |
|                   | HsFLAG-Control_HeLa_NE   | 3.8894 | 0.3764 | 1314.54 | 1315.56 | 7099.1 | 1 | 843.2  | 68.2 | 1  | R.EHALLAYTLGVK.Q                                                  |
|                   | HsFLAG-Control_HeLa_S1(  | 3.3633 | 0.3249 | 1314.54 | 1315.56 | 6442.6 | 1 | 682.8  | 63.6 | 1  | R.EHALLAYTLGVK.Q                                                  |
|                   | HsHeLa3_Ti_105.2226.222( | 3.7276 | 0.3842 | 1314.65 | 1315.56 | 5432.8 | 1 | 771    | 68.2 | 6  | R.EHALLAYTLGVK.Q                                                  |
|                   | HsGST-MOCK_Ti_405.244(   | 3.0462 | 0.2235 | 1314.83 | 1315.56 | 6532.9 | 2 | 861.4  | 72.7 | 2  | R.EHALLAYTLGVK.Q                                                  |
|                   | HsHeLa_Control-MG_Ti_10  | 3.4703 | 0.3478 | 1314.83 | 1315.56 | 5679.7 | 1 | 655    | 63.6 | 2  | R.EHALLAYTLGVK.Q                                                  |
|                   | HsFLAG-Control_HeLa_S1(  | 4.0957 | 0.3505 | 1315.1  | 1315.56 | 6796.4 | 1 | 1542.9 | 86.4 | 7  | R.EHALLAYTLGVK.Q                                                  |
|                   | HsFLAG-Control_HeLa_S1(  | 3.3605 | 0.3219 | 1315.28 | 1315.56 | 7637   | 1 | 1057.6 | 72.7 | 3  | R.EHALLAYTLGVK.Q                                                  |
|                   | HsGST-MOCK_Ti_305.236(   | 3.3426 | 0.261  | 1315.47 | 1315.56 | 3468.6 | 1 | 431.4  | 68.2 | 3  | R.EHALLAYTLGVK.Q                                                  |
|                   | HsGST-MOCK_Ti_305.236(   | 3.4506 | 0.2703 | 1315.48 | 1315.56 | 5538.1 | 1 | 959.1  | 81.8 | 7  | R.EHALLAYTLGVK.Q                                                  |
|                   | HsFLAG-Control_HeLa_NE   | 3.1986 | 0.3053 | 1315.53 | 1315.56 | 6457.5 | 2 | 1086.8 | 77.3 | 2  | R.EHALLAYTLGVK.Q                                                  |
|                   | HsFLAG-Control_HeLa_S1(  | 3.6587 | 0.3109 | 1315.58 | 1315.56 | 6360.4 | 2 | 555.9  | 59.1 | 3  | R.EHALLAYTLGVK.Q                                                  |
|                   | HsHeLa3_Ti_105.2218.221( | 3.3286 | 0.2525 | 1316.68 | 1315.56 | 6114.4 | 2 | 1130.5 | 81.8 | 2  | R.EHALLAYTLGVK.Q                                                  |
|                   | HsHeLa_Control-MG_Ti_10  | 3.3203 | 0.2631 | 1316.86 | 1315.56 | 6340.9 | 1 | 1163.7 | 81.8 | 6  | R.EHALLAYTLGVK.Q                                                  |
|                   | HsGST-MOCK_Ti_102.183(   | 2.8304 | 0.2663 | 1317.2  | 1315.56 | 6447.2 | 1 | 1041.9 | 77.3 | 1  | R.EHALLAYTLGVK.Q                                                  |
| *                 | HsGST-MOCK_Ti_102.024(   | 5.5659 | 0.4436 | 3696.32 | 3698.21 | 6354   | 1 | 1315.9 | 32   | 7  | K.KIGYNPDTVAFVPIISGWNGDNMLEPSANMPWFK.G                            |
|                   | HsGST-MOCK_Ti_102.288(   | 4.727  | 0.4142 | 2785.5  | 2785.09 | 5899.5 | 1 | 490.2  | 28   | 2  | R.KDGNASGTTLEALDCILPPTRPTDK.P                                     |
|                   | HsF-IP-293-MG_Ti_106.26( | 3.9296 | 0.1716 | 2655.77 | 2656.92 | 6529.7 | 3 | 445.9  | 35.4 | 3  | K.DGNASGTTLEALDCILPPTRPTDK.P                                      |
|                   | Hs293FLP-MG_Ti_203.417(  | 3.8732 | 0.2516 | 2655.81 | 2656.92 | 7487.7 | 1 | 495.8  | 35.4 | 1  | K.DGNASGTTLEALDCILPPTRPTDK.P                                      |
|                   | HsHeLa_Control-MG_Ti_20  | 4.4261 | 0.341  | 2656.31 | 2656.92 | 5408.6 | 1 | 773.3  | 33.3 | 2  | K.DGNASGTTLEALDCILPPTRPTDK.P                                      |
|                   | Hs283FLP_Ti_106.2780.27( | 3.9835 | 0.2415 | 2656.91 | 2656.92 | 6341.3 | 1 | 544.5  | 39.6 | 3  | K.DGNASGTTLEALDCILPPTRPTDK.P                                      |
|                   | HsHeLa3_Ti_104.3859.385( | 3.7273 | 0.2886 | 2656.97 | 2656.92 | 7063.1 | 1 | 502.4  | 37.5 | 11 | K.DGNASGTTLEALDCILPPTRPTDK.P                                      |
|                   | HsFLAG-Control_293_Ti_1( | 3.9548 | 0.2565 | 2657.21 | 2656.92 | 4899.5 | 2 | 421    | 28.1 | 1  | K.DGNASGTTLEALDCILPPTRPTDK.P                                      |
|                   | HsGST-MOCK_Ti_404.425(   | 4.0974 | 0.2737 | 2657.25 | 2656.92 | 5198.4 | 1 | 593.3  | 30.2 | 2  | K.DGNASGTTLEALDCILPPTRPTDK.P                                      |
|                   | HsHeLa3_Ti_103.4042.404( | 4.9245 | 0.3211 | 2657.5  | 2656.92 | 4177.2 | 1 | 533    | 33.3 | 2  | K.DGNASGTTLEALDCILPPTRPTDK.P                                      |
|                   | HsHeLa_Control-MG_Ti_20  | 4.2834 | 0.3028 | 2657.7  | 2656.92 | 6635.7 | 2 | 574.6  | 39.6 | 5  | K.DGNASGTTLEALDCILPPTRPTDK.P                                      |
|                   | Hs293FLP-MG_Ti_203.416(  | 4.1604 | 0.3362 | 2657.77 | 2656.92 | 5933.7 | 1 | 778.9  | 32.3 | 1  | K.DGNASGTTLEALDCILPPTRPTDK.P                                      |
|                   | HsF-IP-293-MG_Ti_106.26( | 4.4562 | 0.204  | 2658.01 | 2656.92 | 4518.3 | 1 | 714.8  | 35.4 | 1  | K.DGNASGTTLEALDCILPPTRPTDK.P                                      |
|                   | HsGST-MOCK_Ti_303.412(   | 4.7498 | 0.2542 | 2658.05 | 2656.92 | 6564.7 | 1 | 447.9  | 35.4 | 5  | K.DGNASGTTLEALDCILPPTRPTDK.P                                      |

|                   |                           |        |        |         |         |        |   |        |      |    |                                                                      |
|-------------------|---------------------------|--------|--------|---------|---------|--------|---|--------|------|----|----------------------------------------------------------------------|
| *                 | HsFLAG-Control_HeLa_S1(   | 4.7477 | 0.256  | 3025.02 | 3023.38 | 9881.3 | 4 | 606    | 22.2 | 3  | K.DGNASGTTLLEALDCILPPTRPTDKPLR.L                                     |
| *                 | HsHeLa_Control-MG_Ti_20   | 4.4221 | 0.2834 | 3978.86 | 3980.52 | 9399.8 | 6 | 465.8  | 17.9 | 2  | K.DGNASGTTLLEALDCILPPTRPTDKPLRLPLQDVYK.I                             |
|                   | Hs293FLP-MG_Ti_204.174:   | 1.8645 | 0.2129 | 1025.5  | 1026.22 | 4916.9 | 7 | 205.7  | 55   | 1  | K.IGGIGTVPVGR.V                                                      |
|                   | Hs293FLP-MG_Ti_304.147:   | 1.8582 | 0.2752 | 1025.51 | 1026.22 | 4087.8 | 7 | 177.1  | 55   | 1  | K.IGGIGTVPVGR.V                                                      |
|                   | HsFLAG-Control_HeLa_Ti_1  | 1.9211 | 0.1678 | 1025.52 | 1026.22 | 5051.1 | 4 | 266.3  | 60   | 1  | K.IGGIGTVPVGR.V                                                      |
|                   | HsFLAG-Control_293_Ti_2(  | 2.1086 | 0.236  | 1025.57 | 1026.22 | 5224.8 | 4 | 263.8  | 60   | 2  | K.IGGIGTVPVGR.V                                                      |
|                   | HsFLAG-Control_293_Ti_2(  | 3.6738 | 0.3122 | 1026.38 | 1026.22 | 5169   | 4 | 914.7  | 85   | 3  | K.IGGIGTVPVGR.V                                                      |
|                   | HsFLAG-Control_MG_293_    | 3.7743 | 0.2639 | 1026.42 | 1026.22 | 5236.3 | 5 | 894.4  | 80   | 1  | K.IGGIGTVPVGR.V                                                      |
|                   | HsFLAG-Control_HeLa_S1(   | 3.4654 | 0.1423 | 1026.43 | 1026.22 | 4798.2 | 8 | 804.6  | 80   | 13 | K.IGGIGTVPVGR.V                                                      |
|                   | HsHeLa3_Ti_105.1615.161:  | 3.0073 | 0.2554 | 1027.39 | 1026.22 | 4582.7 | 6 | 778.6  | 80   | 1  | K.IGGIGTVPVGR.V                                                      |
| *                 | HsFLAG-MOCK_300mM_T       | 4.8307 | 0.3105 | 3525.45 | 3524.2  | 5667   | 1 | 437.5  | 22.8 | 2  | K.IGGIGTVPVGRVETGVLKPGMVVTFAPVNVTTTEVK.S                             |
|                   | HsGST-MOCK_Ti_406.291:    | 4.7347 | 0.3369 | 2516.71 | 2517    | 4730.5 | 1 | 514.8  | 45.7 | 26 | R.VETGVLKPGMVVTFAPVNVTTTEVK.S                                        |
|                   | HsHeLa3_Ti_104.2667.266:  | 4.7234 | 0.2826 | 1789.14 | 1790.13 | 5522.4 | 1 | 922.6  | 62.5 | 6  | K.PGMVVTFAPVNVTTTEVK.S                                               |
|                   | HsHeLa3_Ti_102.1954.195:  | 2.5375 | 0.2376 | 1259.61 | 1260.45 | 5698.3 | 2 | 538.9  | 58.3 | 2  | K.SGDAAIVDMVPGK.P                                                    |
| *                 | HsGST-MOCK_Ti_404.343(    | 4.9192 | 0.4679 | 2995.81 | 2997.37 | 6706.2 | 1 | 755.6  | 28.7 | 2  | K.SGDAAIVDMVPGKPMCYESFSYDYPPLGR.F                                    |
| *                 | HsHeLa3_Ti_104.3113.311:  | 3.5765 | 0.4775 | 2996.87 | 2997.37 | 4418.1 | 1 | 505.4  | 38.9 | 3  | K.SGDAAIVDMVPGKPMCYESFSYDYPPLGR.F                                    |
| *                 | HsGST-MOCK_Ti_303.340:    | 3.3785 | 0.3745 | 2997.1  | 2997.37 | 6139.8 | 1 | 307.8  | 29.6 | 2  | K.SGDAAIVDMVPGKPMCYESFSYDYPPLGR.F                                    |
| *                 | HsHeLa3_Ti_103.3290.329:  | 4.2001 | 0.1736 | 2999.22 | 2997.37 | 6238.1 | 1 | 883    | 29.6 | 2  | K.SGDAAIVDMVPGKPMCYESFSYDYPPLGR.F                                    |
|                   | HsFLAG-Control_293_Ti_1(  | 2.1166 | 0.1645 | 914.48  | 915.121 | 2775.6 | 1 | 178.6  | 75   | 1  | R.QTVAVGVIA                                                          |
| gi 4507261 ref NF |                           | 1      | 3      | 0.484   | 62      | 7304   |   |        |      |    | statherin isoform a [Homo sapiens]                                   |
| *                 | HsFLAG-Control_293_Ti_2(  | 4.9182 | 0.3385 | 3646.4  | 3646.01 | 5973.4 | 2 | 504.2  | 25   | 3  | R.FGYGYGPYQPVEQPLYPQYQPYQQYQYTF.-                                    |
| gi 9506651 ref NF |                           | 7      | 81     | 0.483   | 234     | 26093  |   |        |      |    | potassium channel tetramerisation domain containing 5 [Homo sapiens] |
| *                 | HsFLAG-Control_MG_293_    | 3.5665 | 0.296  | 1145.31 | 1145.27 | 6203   | 1 | 1452.4 | 83.3 | 7  | R.GGIGAGLGGGLCR.R                                                    |
| *                 | HsFLAG-Control_293_Ti_2(  | 4.2281 | 0.3229 | 1660.49 | 1659.85 | 8676.1 | 1 | 1208.3 | 56.2 | 8  | R.CSAGLGALAQRPGSVSK.W                                                |
| *                 | HsFLAG-Control_293_Ti_2(  | 3.1586 | 0.2587 | 1343.36 | 1342.54 | 5285   | 1 | 550.7  | 68.2 | 3  | R.LNVGGTYFLTR.Q                                                      |
| *                 | HsFLAG-Control_293_Ti_2(  | 3.1912 | 0.387  | 1555.38 | 1555.77 | 6536.1 | 1 | 986.3  | 70.8 | 3  | R.DPTYFGPVLNLYR.H                                                    |
| *                 | HsFlag1P_Ti_105.4312.431: | 6.2354 | 0.4145 | 2383.01 | 2384.64 | 8771.6 | 1 | 2004.5 | 60   | 45 | K.DLAEEGVLEEAFFYNITSLIK.L                                            |
|                   | HsFLAG-Control_293_Ti_2(  | 5.2966 | 0.4718 | 2499.55 | 2500.76 | 8109.8 | 1 | 1506.2 | 57.5 | 3  | R.VLQCQEEELTQMVSTMSDQGWK.F                                           |
| *                 | HsFLAG-Control_HeLa_NE    | 3.5971 | 0.4414 | 1760.14 | 1760.86 | 5335   | 1 | 624.1  | 60   | 12 | K.ELHNTPYGTASEPSEK.A                                                 |
| gi 14141166 ref N |                           | 18     | 106    | 0.481   | 362     | 38222  |   |        |      |    | poly(rC)-binding protein 2 isoform b [Homo sapiens]                  |
| gi 14141168 ref N |                           | 18     | 106    | 0.475   | 366     | 38651  |   |        |      |    | poly(rC)-binding protein 2 isoform a [Homo sapiens]                  |
|                   | HsFLAG-MOCK_300mM_T       | 3.7768 | 0.4013 | 1482.96 | 1482.83 | 6028.7 | 1 | 1195.7 | 76.9 | 2  | R.LLMHGKEVGSIIK.K                                                    |
|                   | HsFLAG-Control_HeLa_NE    | 4.0721 | 0.1996 | 1289.32 | 1289.35 | 6636.7 | 1 | 1467.5 | 85   | 25 | R.INISEGNCPER.I                                                      |
|                   | HsHeLa3_Ti_105.2595.259:  | 2.8512 | 0.1912 | 1358.64 | 1359.65 | 7780.8 | 8 | 655.7  | 58.3 | 1  | R.IITLAGPTNAIFK.A                                                    |
|                   | HsFLAG-Control_293_Ti_1(  | 2.2998 | 0.1553 | 1358.72 | 1359.65 | 8425   | 4 | 529.7  | 54.2 | 1  | R.IITLAGPTNAIFK.A                                                    |
|                   | HsFLAG-MOCK_300mM_T       | 3.6084 | 0.3079 | 1359.24 | 1359.65 | 4255.9 | 1 | 744.8  | 75   | 15 | R.IITLAGPTNAIFK.A                                                    |
|                   | HsFLAG-Control_HeLa_NE    | 3.9964 | 0.2824 | 1359.54 | 1359.65 | 4776.6 | 1 | 907.8  | 79.2 | 7  | R.IITLAGPTNAIFK.A                                                    |
|                   | HsFLAG-Control_HeLa_S1(   | 2.9877 | 0.2325 | 1359.66 | 1359.65 | 7669.2 | 1 | 843.1  | 62.5 | 2  | R.IITLAGPTNAIFK.A                                                    |
|                   | HsFLAG-Control_HeLa_NE    | 3.2645 | 0.2955 | 1359.71 | 1359.65 | 7897.5 | 1 | 896.6  | 66.7 | 1  | R.IITLAGPTNAIFK.A                                                    |
|                   | HsFLAG-Control_HeLa_NE    | 3.9073 | 0.2638 | 1359.81 | 1359.65 | 5197.3 | 1 | 1021.2 | 79.2 | 7  | R.IITLAGPTNAIFK.A                                                    |
|                   | HsFLAG-Control_293_Ti_2(  | 3.3617 | 0.202  | 1360.12 | 1359.65 | 6340.4 | 1 | 824.2  | 66.7 | 7  | R.IITLAGPTNAIFK.A                                                    |
|                   | HsHeLa_Control_Ti_105.31  | 2.9389 | 0.1942 | 1361.02 | 1359.65 | 4237   | 1 | 713.7  | 75   | 1  | R.IITLAGPTNAIFK.A                                                    |
|                   | HsFLAG-MOCK_300mM_T       | 4.3252 | 0.2965 | 3353.65 | 3353.83 | 6029.2 | 1 | 997.7  | 29.2 | 3  | K.AFAMIIDKLEEDISSMTNSTAASRPPVTLR.L                                   |
|                   | HsHeLa3_Ti_104.1799.180:  | 3.2137 | 0.3342 | 1431.5  | 1429.67 | 4003.3 | 1 | 487.1  | 65.4 | 3  | R.LVVPASQCGSLIGK.G                                                   |
|                   | HsGST-MOCK_Ti_402.221:    | 4.9595 | 0.4065 | 2090.84 | 2091.26 | 6640.2 | 1 | 1123.5 | 57.9 | 9  | R.ESTGAQVQVAGDMLPNSTER.A                                             |
|                   | HsFLAG-Control_HeLa_NE    | 3.5682 | 0.3328 | 1713.61 | 1714.02 | 3516.5 | 1 | 629.9  | 70   | 14 | R.AITIAGIPQSIIECVK.Q                                                 |
|                   | HsFLAG-Control_HeLa_S1(   | 4.0863 | 0.2965 | 2431.88 | 2430.77 | 4417.4 | 1 | 458.6  | 31.8 | 1  | K.GVTIPYRPKPSSSPVIFAGGQDR.Y                                          |
|                   | HsHeLa3_Ti_103.1363.136:  | 3.1173 | 0.2554 | 1159.84 | 1159.24 | 4475.6 | 1 | 832    | 80   | 4  | K.IANPVEGSTDR.Q                                                      |

|                    |                          |        |        |         |         |         |     |        |      |    |                                                                  |
|--------------------|--------------------------|--------|--------|---------|---------|---------|-----|--------|------|----|------------------------------------------------------------------|
|                    | HsFLAG-Control_HeLa_S10  | 5.1229 | 0.464  | 2206.92 | 2206.55 | 6455.7  | 1   | 899.6  | 52.5 | 3  | R.QVTITGSAASISLAQYLINVR.L                                        |
| gij 11136628 ref N |                          | 16     | 71     | 0.48    | 225     | 24764   | 4.7 | U      |      |    | eukaryotic translation elongation factor 1 beta 2 [Homo sapiens] |
| gij 4503477 ref N  |                          | 16     | 71     | 0.48    | 225     | 24764   | 4.7 | U      |      |    | eukaryotic translation elongation factor 1 beta 2 [Homo sapiens] |
|                    | HsGST-MOCK_Ti_303.306    | 5.634  | 0.4033 | 1604.36 | 1604.8  | 7386.7  | 1   | 2350.2 | 85.7 | 15 | K.SPAGLQVLNDYLADK.S                                              |
|                    | HsFLAG-Control_MG_293_   | 2.0266 | 0.1299 | 726.64  | 726.938 | 3702.4  | 1   | 463.1  | 83.3 | 3  | K.KPALVAK.S                                                      |
|                    | HsGST-MOCK_Ti_404.354    | 6.0939 | 0.1355 | 2849.27 | 2851.16 | 5904.8  | 1   | 886.6  | 34.8 | 6  | K.SSILLDVKPWDEETDMAKLEECVR.S                                     |
|                    | HsGST-MOCK_Ti_303.348    | 3.7755 | 0.1478 | 2851.07 | 2851.16 | 7026.4  | 1   | 613.2  | 41.3 | 1  | K.SSILLDVKPWDEETDMAKLEECVR.S                                     |
|                    | HsGST-MOCK_Ti_302.251    | 5.09   | 0.236  | 1996.66 | 1995.13 | 8875.4  | 1   | 2571.4 | 80   | 2  | K.PWDEETDMAKLEECVR.S                                             |
|                    | HsGST-MOCK_Ti_303.224    | 3.1548 | 0.2948 | 1347.39 | 1348.5  | 4834.9  | 1   | 348.9  | 50   | 3  | R.SIQADGLVWGSSK.L                                                |
|                    | HsGST-MOCK_Ti_403.240    | 4.552  | 0.4393 | 1348.09 | 1348.5  | 5859.7  | 1   | 1463.5 | 83.3 | 4  | R.SIQADGLVWGSSK.L                                                |
|                    | HsGST-MOCK_Ti_304.187    | 1.8821 | 0.2503 | 945.42  | 946.178 | 3098.6  | 4   | 332.3  | 68.8 | 1  | K.LVPVGYGIK.K                                                    |
|                    | HsGST-MOCK_Ti_304.189    | 2.9994 | 0.3378 | 1474.47 | 1475.65 | 4272.6  | 2   | 535    | 63.6 | 3  | K.KLQIQCVVEDDK.V                                                 |
|                    | HsGST-MOCK_Ti_404.199    | 4.8653 | 0.3375 | 1474.84 | 1475.65 | 7647.6  | 1   | 2151.3 | 90.9 | 5  | K.KLQIQCVVEDDK.V                                                 |
|                    | HsGST-MOCK_Ti_101.077    | 4.8945 | 0.3341 | 1475.3  | 1475.65 | 7192.3  | 1   | 1660.3 | 86.4 | 2  | K.KLQIQCVVEDDK.V                                                 |
|                    |                          |        |        |         |         |         |     |        |      |    | K.LQIQCVVEDDKVGTDMLEEQITAFEDYVQSM DVAAFN                         |
|                    | HsGST-MOCK_Ti_304.023    | 5.9751 | 0.5591 | 4493.24 | 4494.99 | 8950.3  | 1   | 1459.1 | 25.7 | 6  | KI.-                                                             |
|                    | HsGST-MOCK_Ti_302.545    | 4.9342 | 0.453  | 3053.77 | 3053.38 | 7726.2  | 1   | 1034   | 42.3 | 3  | K.VGTDMLLEEQITAFEDYVQSM DVAAFNK.I                                |
|                    | HsGST-MOCK_Ti_303.570    | 5.3471 | 0.4711 | 3054    | 3053.38 | 7194.5  | 1   | 1032.1 | 31.7 | 3  | K.VGTDMLLEEQITAFEDYVQSM DVAAFNK.I                                |
|                    | HsGST-MOCK_Ti_305.006    | 5.5284 | 0.4282 | 3165.29 | 3166.54 | 6653.4  | 1   | 1467.3 | 36.1 | 3  | K.VGTDMLLEEQITAFEDYVQSM DVAAFNK.I.-                              |
|                    | HsGST-MOCK_Ti_303.008    | 4.8588 | 0.4737 | 3165.49 | 3166.54 | 7011.9  | 1   | 780.2  | 38.9 | 11 | K.VGTDMLLEEQITAFEDYVQSM DVAAFNK.I.-                              |
| gij 4826898 ref N  |                          | 6      | 11     | 0.479   | 140     | 15054   | 8.3 | U      |      |    | profilin 1 [Homo sapiens]                                        |
| *                  | HsFLAG-Control_293_Ti_20 | 4.6381 | 0.3605 | 1646.1  | 1644.95 | 5749.6  | 1   | 820.7  | 60   | 1  | K.TFVNITPAEVLVVGK.D                                              |
| *                  | Hs293FLP_TREX_Ti_106.2   | 5.139  | 0.414  | 1742.56 | 1742.93 | 6561.5  | 1   | 1705   | 80   | 3  | K.DRSSFYVNGLTGGQK.C                                              |
| *                  | Hs293FLP_TREX_Ti_103.2   | 4.4816 | 0.4099 | 1471.45 | 1471.65 | 6303.7  | 1   | 1382.7 | 76.9 | 4  | R.SSFYVNGLTGGQK.C                                                |
| *                  | Hs293FLP_TREX_Ti_104.1   | 3.5899 | 0.3914 | 1724.58 | 1724.91 | 4470    | 1   | 448.2  | 56.2 | 1  | K.STGGAPTFNVTVTKTDK.T                                            |
| *                  | HsHeLa3_Ti_104.2177.217  | 2.5574 | 0.2319 | 874.76  | 875.158 | 8094.3  | 2   | 713.9  | 71.4 | 1  | K.TLVLLMGK.E                                                     |
| *                  | Hs293FLP_TREX_Ti_104.1   | 1.9463 | 0.184  | 1023.46 | 1024.17 | 2502.5  | 7   | 153.1  | 55.6 | 1  | K.EGVHGGLINK.K                                                   |
| gij 62414289 ref N |                          | 21     | 223    | 0.476   | 466     | 53652   | 5.1 | U      |      |    | vimentin [Homo sapiens]                                          |
| *                  | HsHeLa-FLAG-IP_S100_Ti_  | 4.461  | 0.2322 | 1429.43 | 1429.57 | 6542.7  | 1   | 1672.2 | 80.8 | 8  | R.SLYASSPGGVYATR.S                                               |
| *                  | HsHeLa-FLAG-IP_S100_Ti_  | 6.0232 | 0.481  | 2127.72 | 2127.36 | 8683.4  | 1   | 2603.5 | 72.2 | 56 | R.LLQDSVDFSLADAINTEFK.N                                          |
| *                  | HsHeLa-FLAG-IP_S100_Ti_  | 2.7269 | 0.1253 | 871.14  | 870.981 | 3016.7  | 3   | 725.4  | 100  | 2  | R.FANYIDK.V                                                      |
| *                  | HsHeLa-FLAG-IP_S100_Ti_  | 3.935  | 0.1468 | 1170.43 | 1170.44 | 5070.1  | 1   | 1168.4 | 88.9 | 18 | K.ILLAELEQLK.G                                                   |
| *                  | HsFlag1P_Ti_106.2638.263 | 2.9915 | 0.182  | 1540.18 | 1540.84 | 10157.7 | 2   | 837.7  | 57.7 | 1  | K.ILLAELEQLKGQK.S                                                |
| *                  | HsHeLa-FLAG-IP_S100_Ti_  | 3.6077 | 0.2183 | 1256.06 | 1255.39 | 5756.6  | 1   | 1136.1 | 83.3 | 9  | R.LGDLYEEEMR.E                                                   |
| *                  | HsHeLa-FLAG-IP_S100_Ti_  | 3.7179 | 0.2051 | 1217.25 | 1217.32 | 6174.2  | 1   | 1242.3 | 88.9 | 6  | R.RQVDQLTNDK.A                                                   |
| *                  | HsHeLa-FLAG-IP_S100_Ti_  | 2.9394 | 0.2377 | 1076.88 | 1077.2  | 6080.9  | 8   | 770.8  | 81.2 | 2  | R.DNLAEDIMR.L                                                    |
| *                  | HsFLAG-Control_HeLa_S10  | 3.3434 | 0.2942 | 1325.75 | 1324.39 | 8302.5  | 1   | 1217.5 | 80   | 8  | R.EEAENTLQSFR.Q                                                  |
| *                  | HsFLAG-Control_HeLa_S10  | 3.1421 | 0.2626 | 1088.98 | 1089.15 | 5302.3  | 1   | 837.6  | 83.3 | 7  | R.QDVDNASLAR.L                                                   |
| *                  | HsFLAG-Control_HeLa_S10  | 3.7411 | 0.248  | 1535.14 | 1534.79 | 9285    | 1   | 1292.5 | 70.8 | 5  | R.KVESLQEEIAFLK.K                                                |
| *                  | HsFLAG-Control_HeLa_S10  | 2.5514 | 0.1421 | 1309.34 | 1310.41 | 5869.4  | 1   | 439.7  | 66.7 | 1  | K.NLQEAEEWYK.S                                                   |
| *                  | HsHeLa-FLAG-IP_S100_Ti_  | 3.9546 | 0.1201 | 1310.13 | 1310.41 | 6762.9  | 3   | 1198.2 | 83.3 | 13 | K.NLQEAEEWYK.S                                                   |
| *                  | HsFLAG-Control_HeLa_S10  | 3.4526 | 0.0868 | 1310.27 | 1310.41 | 6168.1  | 1   | 1134   | 83.3 | 3  | K.NLQEAEEWYK.S                                                   |
| *                  | HsHeLa-FLAG-IP_S100_Ti_  | 4.3357 | 0.2135 | 1093.95 | 1094.17 | 6197.5  | 1   | 1509.1 | 94.4 | 6  | K.FADLSEAANR.N                                                   |
| *                  | HsHeLa-FLAG-IP_S100_Ti_  | 3.7295 | 0.2714 | 1491.22 | 1491.65 | 5760    | 1   | 694.7  | 70.8 | 26 | R.QVQSLTCEVDALK.G                                                |
| *                  | HsHeLa-FLAG-IP_S100_Ti_  | 5.8107 | 0.4715 | 2186.94 | 2188.33 | 8128.1  | 1   | 2201.4 | 69.4 | 19 | R.EMEENFAVEAANYQDTIGR.L                                          |
| *                  | HsHeLa-FLAG-IP_S100_Ti_  | 2.8382 | 0.1203 | 932.36  | 933.006 | 3007.7  | 7   | 641.4  | 92.9 | 1  | K.LLEGEESR.I                                                     |
| *                  | HsFLAG-Control_HeLa_S10  | 3.2663 | 0.1628 | 1571.88 | 1571.86 | 4780    | 1   | 675.6  | 65.4 | 13 | R.ISLPLPNFSSLNLR.E                                               |
| *                  | HsFLAG-Control_HeLa_S10  | 3.4999 | 0.2712 | 1669.73 | 1669.83 | 4759.9  | 1   | 578.9  | 60.7 | 11 | R.ETNLDLPLVDTHSK.R                                               |
| *                  | HsFLAG-Control_HeLa_S10  | 3.4606 | 0.2526 | 1838.2  | 1837.85 | 8947.6  | 1   | 1088.1 | 60   | 8  | R.DGQVINETSQHHDDLE.-                                             |



|                          |        |        |         |         |         |     |        |                                                                           |    |                                                                                                    |
|--------------------------|--------|--------|---------|---------|---------|-----|--------|---------------------------------------------------------------------------|----|----------------------------------------------------------------------------------------------------|
| gi 29294624 ref NF       | 8      | 48     | 0.475   | 118     | 13527   | 9.9 | U      | small nuclear ribonucleoprotein polypeptide D2 [Homo sapiens]             |    |                                                                                                    |
| gi 4759158 ref NF        | 8      | 48     | 0.475   | 118     | 13527   | 9.9 | U      | small nuclear ribonucleoprotein polypeptide D2 [Homo sapiens]             |    |                                                                                                    |
| HsHeLa_Control-MG_Ti_20  | 3.9346 | 0.3147 | 2164.02 | 2164.38 | 9913.2  | 2   | 1395.7 | 38.9                                                                      | 1  | K.R.E.E.E.E.F.N.T.G.P.L.S.V.L.T.Q.S.V.K.N                                                          |
| Hs293FLP-MG_Ti_203.315   | 4.4264 | 0.2982 | 2164.57 | 2164.38 | 9045.8  | 1   | 1438.5 | 38.9                                                                      | 1  | K.R.E.E.E.E.F.N.T.G.P.L.S.V.L.T.Q.S.V.K.N                                                          |
| HsF-IP-293-MG_Ti_106.24  | 3.707  | 0.2306 | 2165.99 | 2164.38 | 11547.5 | 1   | 1379.1 | 52.8                                                                      | 9  | K.R.E.E.E.E.F.N.T.G.P.L.S.V.L.T.Q.S.V.K.N                                                          |
| HsF-IP-293_Ti_202.0174.0 | 4.2379 | 0.4554 | 2006.59 | 2008.19 | 6443.9  | 1   | 716.5  | 52.9                                                                      | 19 | R.E.E.E.E.F.N.T.G.P.L.S.V.L.T.Q.S.V.K.N                                                            |
| HsFLAG-Control_Hela_Ti_1 | 2.8197 | 0.2817 | 1232.37 | 1232.35 | 6582.5  | 2   | 658.5  | 72.2                                                                      | 1  | K.N.N.T.Q.V.L.I.N.C.R.N                                                                            |
| HsHeLa3_Ti_105.1559.155  | 3.3352 | 0.3013 | 1245.36 | 1244.42 | 7642.1  | 1   | 942.6  | 72.2                                                                      | 1  | R.H.C.N.M.V.L.E.N.V.K.E                                                                            |
| Hs283FLP_Ti_102.1831.18  | 2.8572 | 0.0875 | 1329.18 | 1329.6  | 4649.7  | 2   | 757.6  | 72.2                                                                      | 4  | K.D.R.Y.I.S.K.M.F.L.R.G                                                                            |
| HsF-IP-293-MG_Ti_103.12  | 2.4795 | 0.1107 | 712.45  | 712.867 | 3804.6  | 7   | 424.9  | 75                                                                        | 12 | R.N.P.L.I.A.G.K.-                                                                                  |
| gi 10863927 ref NF       | 11     | 36     | 0.461   | 165     | 18012   | 7.8 | U      | peptidylprolyl isomerase A isoform 1 [Homo sapiens]                       |    |                                                                                                    |
| gi 89058333 ref NF       | 11     | 36     | 0.342   | 222     | 24517   | 7.4 | U      | PREDICTED: similar to peptidylprolyl isomerase A isoform 1 [Homo sapiens] |    |                                                                                                    |
| gi 89058151 ref NF       | 11     | 36     | 0.342   | 222     | 24517   | 7.4 | U      | PREDICTED: similar to peptidylprolyl isomerase A isoform 1 [Homo sapiens] |    |                                                                                                    |
| Hs293FLP_TREX_Ti_105.2   | 2.1541 | 0.151  | 1055.28 | 1056.2  | 8290.5  | 3   | 582.3  | 68.8                                                                      | 2  | R.V.S.F.E.L.F.A.D.K.V                                                                              |
| HsHeLa3_Ti_103.2434.243  | 2.5598 | 0.2327 | 1055.73 | 1056.2  | 8561    | 1   | 990.3  | 75                                                                        | 2  | R.V.S.F.E.L.F.A.D.K.V                                                                              |
| Hs293FLP_TREX_Ti_104.2   | 3.1958 | 0.1307 | 1056.23 | 1056.2  | 3545.6  | 2   | 775.3  | 87.5                                                                      | 2  | R.V.S.F.E.L.F.A.D.K.V                                                                              |
| HsHeLa3_Ti_103.2431.243  | 3.1848 | 0.1273 | 1056.99 | 1056.2  | 4330.5  | 1   | 923.6  | 87.5                                                                      | 3  | R.V.S.F.E.L.F.A.D.K.V                                                                              |
| HsFlag1P_Ti_105.2688.268 | 3.7239 | 0.2131 | 1381.39 | 1380.63 | 6124.7  | 1   | 1064.6 | 77.3                                                                      | 3  | R.V.S.F.E.L.F.A.D.K.V.P.K.T                                                                        |
| Hs293FLP_Ti_303.2326.23  | 4.7457 | 0.4024 | 1833.59 | 1833.05 | 5532.2  | 1   | 1136.4 | 71.4                                                                      | 12 | K.S.I.Y.G.E.K.F.E.D.E.N.F.I.L.K.H                                                                  |
| HsFLAG-Control_HeLa_NE   | 3.0165 | 0.0863 | 1156.01 | 1155.29 | 3596.6  | 7   | 683.1  | 87.5                                                                      | 5  | K.F.E.D.E.N.F.I.L.K.H                                                                              |
| HsHeLa3_Ti_106.2531.253  | 2.8541 | 0.1606 | 2793.81 | 2793.09 | 7093.5  | 1   | 670.5  | 38.5                                                                      | 1  | K.H.T.G.P.G.I.L.S.M.A.N.A.G.P.N.T.N.G.S.Q.F.F.I.C.T.A.K.T                                          |
| HsHeLa3_Ti_102.2319.231  | 1.9789 | 0.3177 | 1278.76 | 1279.47 | 2429.2  | 2   | 135.6  | 60                                                                        | 1  | K.E.G.M.N.I.V.E.A.M.E.R.F                                                                          |
| HsHeLa3_Ti_103.1678.167  | 2.6585 | 0.1596 | 1247.65 | 1248.39 | 4897.8  | 1   | 486.1  | 65                                                                        | 2  | K.K.I.T.I.A.D.C.G.Q.L.E.-                                                                          |
| HsHeLa3_Ti_103.1688.168  | 3.5669 | 0.2195 | 1248.57 | 1248.39 | 5702.4  | 1   | 964.8  | 75                                                                        | 3  | K.K.I.T.I.A.D.C.G.Q.L.E.-                                                                          |
| gi 4503117 ref NF        | 6      | 18     | 0.459   | 98      | 11140   | 7.6 | U      | cystatin B [Homo sapiens]                                                 |    |                                                                                                    |
| HsGST-MOCK_Ti_403.231    | 4.1033 | 0.3264 | 1327.36 | 1327.52 | 6810.5  | 1   | 1763.9 | 90.9                                                                      | 3  | K.S.Q.V.V.A.G.T.N.Y.F.I.K.V                                                                        |
| HsGST-MOCK_Ti_305.204    | 4.3874 | 0.3823 | 1424.75 | 1423.57 | 5805.8  | 1   | 1332.4 | 86.4                                                                      | 4  | K.V.H.V.G.D.E.D.F.V.H.L.R.V                                                                        |
| Hs293FLP-MG_Ti_206.268   | 5.1887 | 0.416  | 2458.64 | 2459.76 | 7826.9  | 1   | 1633   | 60                                                                        | 5  | R.V.F.Q.S.L.P.H.E.N.K.P.L.T.L.S.N.Y.Q.T.N.K.A                                                      |
| HsGST-MOCK_Ti_104.159    | 4.1621 | 0.3439 | 2458.7  | 2459.76 | 3869.9  | 1   | 529.7  | 35                                                                        | 1  | R.V.F.Q.S.L.P.H.E.N.K.P.L.T.L.S.N.Y.Q.T.N.K.A                                                      |
| HsHeLa_Control-MG_Ti_20  | 4.0992 | 0.36   | 2459.4  | 2459.76 | 4332.3  | 1   | 833.2  | 41.2                                                                      | 2  | R.V.F.Q.S.L.P.H.E.N.K.P.L.T.L.S.N.Y.Q.T.N.K.A                                                      |
| HsHeLa_Control-MG_Ti_20  | 5.2511 | 0.3882 | 2459.44 | 2459.76 | 8357.3  | 1   | 1660.4 | 57.5                                                                      | 3  | R.V.F.Q.S.L.P.H.E.N.K.P.L.T.L.S.N.Y.Q.T.N.K.A                                                      |
| gi 4504517 ref NF        | 6      | 57     | 0.449   | 205     | 22783   | 6.4 | U      | heat shock 27kDa protein 1 [Homo sapiens]                                 |    |                                                                                                    |
| HsFLAG-Control_HeLa_NE   | 4.144  | 0.2464 | 1164.72 | 1164.35 | 7284.6  | 1   | 1694.1 | 94.4                                                                      | 10 | R.L.F.D.Q.A.F.G.L.P.R.L<br>R.L.P.E.E.W.S.Q.W.L.G.G.S.S.W.P.G.Y.V.R.P.L.P.P.A.A.I.E.S.P.A.V.A.A.P.A |
| HsFLAG-Control_HeLa_S1   | 5.6318 | 0.5139 | 4095.03 | 4095.61 | 7340.2  | 1   | 1264.2 | 27.7                                                                      | 2  | Y.S.R.A                                                                                            |
| HsHeLa_Control-MG_Ti_10  | 4.7682 | 0.4144 | 1785.96 | 1785.01 | 7050    | 1   | 1281.8 | 66.7                                                                      | 17 | R.V.S.L.D.V.N.H.F.A.P.E.L.T.V.K.T                                                                  |
| HsFLAG-Control_HeLa_S1   | 3.5619 | 0.2437 | 1147.11 | 1147.31 | 5508.1  | 1   | 980.8  | 80                                                                        | 1  | K.T.K.D.G.V.V.E.I.T.G.K.H                                                                          |
| HsFLAG-Control_HeLa_NE   | 2.6002 | 0.2355 | 917.65  | 918.035 | 6402    | 1   | 681.6  | 75                                                                        | 5  | K.D.G.V.V.E.I.T.G.K.H                                                                              |
| HsFLAG-Control_HeLa_S1   | 3.66   | 0.3224 | 1907.13 | 1907.13 | 5046.9  | 1   | 381.8  | 50                                                                        | 22 | K.L.A.T.Q.S.N.E.I.T.I.P.V.T.F.E.S.R.A                                                              |
| gi 4885165 ref NF        | 4      | 15     | 0.449   | 98      | 11006   | 5.5 | U      | cystatin A [Homo sapiens]                                                 |    |                                                                                                    |
| HsFLAG-Control_293_Ti_2  | 4.6179 | 0.3953 | 1644.28 | 1644.82 | 7184.5  | 1   | 1579.2 | 76.9                                                                      | 5  | K.T.N.E.T.Y.G.K.L.E.A.V.Q.Y.K.T                                                                    |
| HsFLAG-Control_Hela_Ti_1 | 3.953  | 0.3048 | 1357.27 | 1357.55 | 6677.7  | 1   | 1688.1 | 86.4                                                                      | 1  | K.T.Q.V.V.A.G.T.N.Y.Y.I.K.V                                                                        |
| HsFLAG-Control_Hela_Ti_1 | 2.477  | 0.1487 | 1357.44 | 1357.55 | 6324.8  | 2   | 419.3  | 59.1                                                                      | 1  | K.T.Q.V.V.A.G.T.N.Y.Y.I.K.V                                                                        |
| HsFLAG-Control_HeLa_S1   | 3.9093 | 0.5003 | 1976.25 | 1977.18 | 3839.6  | 1   | 413.5  | 55.9                                                                      | 8  | K.S.L.P.G.Q.N.E.D.L.V.L.T.G.Y.Q.V.D.K.N                                                            |
| gi 34098946 ref NF       | 10     | 28     | 0.448   | 324     | 35924   | 9.9 | U      | nuclease sensitive element binding protein 1 [Homo sapiens]               |    |                                                                                                    |
| Hs293FLP_TREX_Ti_104.1   | 4.6707 | 0.3218 | 1745.58 | 1745.93 | 7523.4  | 1   | 1699.8 | 75                                                                        | 4  | R.N.D.T.K.E.D.V.F.V.H.Q.T.A.I.K.K                                                                  |
| HsHeLa_Control-MG_Ti_10  | 3.2281 | 0.3251 | 1875.08 | 1874.1  | 8473.9  | 1   | 1219.1 | 60                                                                        | 1  | R.N.D.T.K.E.D.V.F.V.H.Q.T.A.I.K.K.N                                                                |
| HsHeLa_Control_Ti_102.21 | 4.3285 | 0.3574 | 1796.81 | 1796.88 | 4791    | 1   | 826.4  | 62.5                                                                      | 11 | R.S.V.G.D.G.E.T.V.E.F.D.V.V.E.G.E.K.G                                                              |
| HsFLAG-MOCK_300mM_T      | 3.6248 | 0.1333 | 1696.96 | 1696.86 | 5052.5  | 1   | 1372.3 | 63.9                                                                      | 4  | K.G.A.E.A.A.N.V.T.G.P.G.G.V.P.V.Q.G.S.K.Y                                                          |

|                    |                          |        |        |         |         |         |   |        |      |    |                                                                     |
|--------------------|--------------------------|--------|--------|---------|---------|---------|---|--------|------|----|---------------------------------------------------------------------|
| *                  | Hs293FLP_TREX_Ti_102.0   | 3.5023 | 0.2744 | 1690    | 1689.69 | 9441.2  | 1 | 1136.7 | 69.2 | 2  | R.NYQQNYQNSESGEK.N                                                  |
| *                  | HsHeLa_Control-MG_Ti_10  | 3.6852 | 0.3588 | 3258.58 | 3259.26 | 7773.5  | 1 | 1101.6 | 29.5 | 2  | R.NYQQNYQNSESGEKNEGSESAPEGQAQQR.R                                   |
| *                  | Hs293FLP_Ti_305.1594.15  | 3.6679 | 0.3186 | 3225.81 | 3225.48 | 5449.1  | 1 | 402.7  | 25.9 | 1  | R.RPQYSNPPVQGEVMEGADNQGAGEQGRPVR.Q                                  |
| *                  | HsFLAG-Control_MG_293_   | 3.5119 | 0.1741 | 1265.97 | 1266.4  | 7349.2  | 6 | 622.3  | 70   | 1  | R.RPENPKPQDGK.E                                                     |
| *                  | HsHeLa_Control-MG_Ti_10  | 2.6819 | 0.2502 | 1624.65 | 1624.79 | 6991.7  | 1 | 680.8  | 61.5 | 1  | R.RPENPKPQDGKETK.A                                                  |
| *                  | Hs293FLP_TREX_Ti_101.0   | 2.9319 | 0.2638 | 1899.5  | 1898.89 | 3481.4  | 1 | 497.4  | 52.6 | 1  | K.AADPPAENS SAPEAEQGGAE.-                                           |
| gi 39930523 ref NF | 10                       | 45     | 0.446  | 381     | 41037   | 5 U     |   |        |      |    | hypothetical protein LOC144097 [Homo sapiens]                       |
| *                  | HsFLAG-Control_HeLa_NE   | 3.5594 | 0.2499 | 2122.45 | 2122.26 | 5016.1  | 1 | 676.8  | 36.8 | 1  | K.TPPRPRSPLEAGSDGCEEPK.Q                                            |
| *                  | Hs293FLP-MG_Ti_205.155   | 2.7509 | 0.1808 | 2123.35 | 2122.26 | 9271.2  | 1 | 492.1  | 42.1 | 2  | K.TPPRPRSPLEAGSDGCEEPK.Q                                            |
| *                  | HsHeLa_Control-MG_Ti_10  | 5.3968 | 0.4873 | 2070.26 | 2069.28 | 6208.3  | 1 | 1235.4 | 64.7 | 5  | R.SHILEQHPHTLDLSPSEK.S                                              |
| *                  | HsF-IP-293-MG_Ti_106.28  | 4.7378 | 0.2521 | 2000.86 | 2001.25 | 6919.3  | 1 | 2628   | 73.5 | 12 | K.SNILEAWSEGVALLDQDVR.A                                             |
| *                  | HsFlag1P_Ti_105.3226.322 | 4.8866 | 0.2977 | 2223.8  | 2224.58 | 8349.8  | 1 | 944.4  | 47.4 | 3  | R.MPAEIVVLLDSEDNPSLPKR.S                                            |
| *                  | HsFLAG-Control_HeLa_NE   | 4.6533 | 0.4181 | 1861    | 1860.16 | 5963.8  | 1 | 731.3  | 55.9 | 16 | R.GLRPLELPAVPATEPGNK.K                                              |
| *                  | HsHeLa_Control_Ti_102.22 | 3.1104 | 0.2893 | 2650.06 | 2650.82 | 5128.4  | 1 | 386.5  | 41.7 | 2  | K.NLDPPEPPSPDPTETFAAPAEVR.H                                         |
| *                  | HsFLAG-Control_HeLa_NE   | 3.4066 | 0.0907 | 1200.68 | 1199.31 | 4779.5  | 1 | 1303.2 | 90   | 1  | K.DREVAEGGLPR.A                                                     |
| *                  | HsFLAG-Control_HeLa_S10  | 2.8146 | 0.201  | 1276.26 | 1276.44 | 7104.8  | 1 | 999.2  | 75   | 2  | R.AESPPAPPGLR.G                                                     |
| *                  | Hs293FLP-MG_Ti_204.223   | 4.1652 | 0.2434 | 2776.7  | 2777.02 | 10900.3 | 3 | 803    | 26   | 1  | K.RVGAGDTSDWPTVLSESSTTVAGKPEK.G                                     |
| gi 5730065 ref NF  | 19                       | 122    | 0.445  | 247     | 28152   | 6 U     |   |        |      |    | spindlin [Homo sapiens]                                             |
| *                  | HsFLAG-Control_HeLa_S10  | 2.5524 | 0.1523 | 1325.71 | 1326.5  | 4833.5  | 1 | 343    | 58.3 | 3  | R.SSVGPSKPVSQPR.R                                                   |
| *                  | HsFLAG-Control_HeLa_S10  | 3.0744 | 0.2231 | 1326.44 | 1326.5  | 3809.5  | 1 | 445.3  | 62.5 | 9  | R.SSVGPSKPVSQPR.R                                                   |
| *                  | HsFLAG-Control_HeLa_NE   | 2.7414 | 0.1165 | 1326.73 | 1326.5  | 4846.4  | 1 | 301.8  | 54.2 | 2  | R.SSVGPSKPVSQPR.R                                                   |
| *                  | HsHeLa-FLAG-IP_S100_Ti   | 2.8836 | 0.2659 | 1326.84 | 1326.5  | 3917.3  | 1 | 420.7  | 62.5 | 3  | R.SSVGPSKPVSQPR.R                                                   |
| *                  | HsFLAG-Control_HeLa_NE   | 4.2609 | 0.2746 | 1857.68 | 1857.2  | 3271.9  | 1 | 643.8  | 68.8 | 43 | K.GTVLDQVPVNPSLYLIK.Y                                               |
| *                  | HsFLAG-Control_HeLa_S10  | 5.5151 | 0.4336 | 1694.69 | 1693.82 | 8717.1  | 1 | 2522.1 | 88.5 | 9  | K.YDGFDCVYGLELNK.D                                                  |
| *                  | HsFLAG-Control_HeLa_NE   | 3.7966 | 0.4115 | 2094.79 | 2094.21 | 7482.3  | 1 | 721.1  | 50   | 8  | K.YDGFDCVYGLELNKDER.V                                               |
| *                  | HsFLAG-Control_HeLa_S10  | 3.7772 | 0.1609 | 1098.99 | 1099.27 | 5421.4  | 1 | 1539.3 | 94.4 | 3  | R.VSALEVLPDR.V                                                      |
| *                  | HsFlag1P_Ti_103.2093.209 | 4.4117 | 0.382  | 1371.51 | 1372.58 | 7864.1  | 1 | 2387.5 | 87.5 | 6  | R.ISDAHLADTMIGK.A                                                   |
| *                  | HsHeLa_Control-MG_Ti_10  | 4.0915 | 0.3401 | 1777.54 | 1777.04 | 6757.4  | 1 | 1720   | 76.9 | 1  | K.DPVLYMYQLLDDYK.E                                                  |
| *                  | HsFlag1P_Ti_106.3196.319 | 5.5281 | 0.375  | 2346.24 | 2347.65 | 10130.9 | 1 | 2660   | 66.7 | 4  | K.DPVLYMYQLLDDYKEGDLR.I                                             |
| *                  | HsFLAG-Control_HeLa_S10  | 4.5343 | 0.3515 | 2347.02 | 2347.65 | 4881.8  | 1 | 856.9  | 38.9 | 1  | K.DPVLYMYQLLDDYKEGDLR.I                                             |
| *                  | HsF-IP-293-MG_Ti_106.27  | 5.0438 | 0.2755 | 2347.34 | 2347.65 | 9931.9  | 1 | 2671.7 | 66.7 | 2  | K.DPVLYMYQLLDDYKEGDLR.I                                             |
| *                  | HsFLAG-Control_HeLa_NE   | 2.7657 | 0.1821 | 854.29  | 854.037 | 3938.9  | 1 | 651.2  | 91.7 | 2  | K.PSVYFIK.F                                                         |
| *                  | HsFLAG-Control_HeLa_NE   | 4.0442 | 0.3492 | 1789.83 | 1789.98 | 4977.2  | 1 | 817.4  | 46.2 | 1  | K.FDDDFHIYVYDLVK.T                                                  |
| *                  | HsFLAG-Control_HeLa_S10  | 3.9146 | 0.3163 | 1790.12 | 1789.98 | 4844.5  | 1 | 1279.7 | 55.8 | 3  | K.FDDDFHIYVYDLVK.T                                                  |
| *                  | HsFLAG-Control_HeLa_NE   | 4.7853 | 0.4088 | 1790.36 | 1789.98 | 8202.8  | 1 | 2020.3 | 80.8 | 5  | K.FDDDFHIYVYDLVK.T                                                  |
| *                  | HsFLAG-Control_HeLa_S10  | 5.8606 | 0.4583 | 1790.46 | 1789.98 | 8612.6  | 1 | 2552   | 84.6 | 10 | K.FDDDFHIYVYDLVK.T                                                  |
| gi 4504445 ref NF  | 12                       | 43     | 0.441  | 320     | 34196   | 9.2 U   |   |        |      |    | heterogeneous nuclear ribonucleoprotein A1 isoform a [Homo sapiens] |
| *                  | HsHeLa3_Ti_105.3090.309  | 4.5282 | 0.3687 | 1785.58 | 1785.99 | 6082.7  | 2 | 1780.4 | 76.7 | 9  | K.LFIGGLSFETTDESLR.S                                                |
| *                  | HsHeLa3_Ti_105.2447.244  | 3.5625 | 0.3412 | 2522.75 | 2522.76 | 8940.5  | 1 | 486.1  | 37.5 | 3  | R.SHFEQWGTLDTCVVMRDPNTK.R                                           |
| *                  | HsHeLa3_Ti_104.3921.392  | 4.7467 | 0.4889 | 2150.92 | 2149.38 | 6734.3  | 1 | 1128.1 | 57.9 | 2  | R.GFGFVYATVEEVDAAMNAR.P                                             |
| *                  | HsHeLa3_Ti_106.2811.281  | 2.9572 | 0.358  | 2510.83 | 2511.81 | 7747.7  | 1 | 557.5  | 36.4 | 1  | R.GFGFVYATVEEVDAAMNARPHK.V                                          |
| *                  | HsHeLa3_Ti_103.0754.075  | 2.9209 | 0.2546 | 1166.16 | 1166.19 | 5370.5  | 1 | 597.6  | 81.2 | 2  | K.EDTEEHLR.D                                                        |
| *                  | HsHeLa3_Ti_105.2479.247  | 3.8073 | 0.2837 | 1219.53 | 1219.44 | 6699.7  | 2 | 1625   | 88.9 | 3  | K.IEVIEIMTDR.G                                                      |
| *                  | HsHeLa3_Ti_105.2430.243  | 4.4011 | 0.3524 | 1859.16 | 1856.99 | 8999.6  | 1 | 1872.5 | 48.3 | 2  | K.RGFAFVTFDDHDSVDK.I                                                |
| *                  | HsHeLa3_Ti_103.2474.247  | 3.6882 | 0.1837 | 1703.05 | 1700.8  | 4900.1  | 1 | 751.7  | 64.3 | 3  | R.GFAFVTFDDHDSVDK.I                                                 |
| *                  | HsHeLa3_Ti_106.1843.184  | 3.5117 | 0.3068 | 1486.8  | 1486.55 | 7334.6  | 1 | 1683.9 | 86.4 | 3  | K.YHTVNGHNCEVR.K                                                    |
| *                  | HsHeLa3_Ti_103.1590.159  | 3.791  | 0.3621 | 1376.88 | 1376.47 | 5034.1  | 1 | 785.5  | 69.2 | 2  | R.SSGPYGGGGQYFAK.P                                                  |
| *                  | Hs293FLP_TREX_Ti_105.1   | 4.0307 | 0.3919 | 1629.49 | 1629.77 | 7357.3  | 1 | 1190.7 | 66.7 | 9  | R.SSGPYGGGGQYFAKPR.N                                                |

|                         |                         |        |         |         |         |        |                                                                              |        |      |                           |                          |
|-------------------------|-------------------------|--------|---------|---------|---------|--------|------------------------------------------------------------------------------|--------|------|---------------------------|--------------------------|
| gij 16507237 ref N      | HsHeLa3_Ti_103.1150.115 | 4.8554 | 0.4695  | 1695.06 | 1695.66 | 6014.4 | 1                                                                            | 1222.4 | 64.7 | 4                         | R.NQGGYGGSSSSSSSYGSGR.R  |
|                         | 23                      | 196    | 0.431   | 654     | 72333   | 5.2 U  | heat shock 70kDa protein 5 (glucose-regulated protein, 78kDa) [Homo sapiens] |        |      |                           |                          |
|                         | HsHeLa_Control-MG_Ti_10 | 3.4607 | 0.2799  | 1567.62 | 1567.74 | 4879.5 | 1                                                                            | 759.3  | 69.2 | 10                        | R.ITPSYVAFTPEGER.L       |
|                         | HsFLAG-Control_HeLa_NE  | 4.4809 | 0.4059  | 1678.36 | 1678.8  | 5144.1 | 1                                                                            | 1285.4 | 78.6 | 13                        | K.NQLTSNPENTVFDK.R       |
|                         | HsGST-MOCK_Ti_302.184   | 3.5871 | 0.2384  | 1430.92 | 1431.55 | 4722.9 | 1                                                                            | 948.6  | 77.3 | 1                         | R.TWNDPSVQQDIK.F         |
|                         | HsFLAG-MOCK_300mM_T     | 4.0908 | 0.2379  | 1735.37 | 1734.01 | 4901.4 | 1                                                                            | 1002.7 | 70   | 1                         | K.KTKPYIQVDIGGGQTK.T     |
|                         | HsHeLa_Control-MG_Ti_10 | 3.604  | 0.3826  | 1537.55 | 1537.81 | 4462   | 1                                                                            | 1221.7 | 84.6 | 4                         | K.TFAPEEISAMVLTK.M       |
|                         | HsHeLa_Control-MG_Ti_20 | 4.5532 | 0.2999  | 2016.65 | 2017.3  | 5160.4 | 1                                                                            | 995    | 67.6 | 3                         | K.KVTHAVVTVPAYFNDAQR.Q   |
|                         | HsHeLa3_Ti_106.2239.223 | 3.1075 | 0.2958  | 1889.76 | 1889.12 | 4775.1 | 1                                                                            | 677.5  | 62.5 | 1                         | K.VTHAVVTVPAYFNDAQR.Q    |
|                         | HsHeLa_Control-MG_Ti_20 | 5.5061 | 0.3911  | 1661.88 | 1660.91 | 4282.5 | 1                                                                            | 1591.7 | 86.7 | 75                        | R.IINEPTAAAAYGLDK.R      |
|                         | HsGST-MOCK_Ti_404.258   | 4.3238 | 0.4122  | 1816.51 | 1817.1  | 7746.6 | 1                                                                            | 1218.8 | 65.6 | 4                         | R.IINEPTAAAAYGLDKR.E     |
|                         | HsHeLa_Control-MG_Ti_20 | 2.8374 | 0.16    | 1154.61 | 1154.27 | 6652.3 | 1                                                                            | 746.9  | 77.8 | 5                         | K.RALSSQHQAR.I           |
|                         | HsFLAG-Control_HeLa_NE  | 4.5787 | 0.4475  | 2165.87 | 2166.3  | 6386.8 | 1                                                                            | 2002.9 | 76.5 | 5                         | R.IEIESFYEGEDFSETLTR.A   |
|                         | HsHeLa_Control-MG_Ti_10 | 3.6824 | 0.3009  | 1513.9  | 1513.75 | 5270.9 | 1                                                                            | 859.3  | 72.7 | 2                         | R.AKFEELNMDLFR.S         |
|                         | HsHeLa_Control-MG_Ti_20 | 5.2951 | 0.3175  | 1589.73 | 1589.79 | 9908   | 1                                                                            | 2657.9 | 78.6 | 8                         | K.KSDIDEIVLVGGSTR.I      |
|                         | HsHeLa_Control-MG_Ti_10 | 5.2164 | 0.435   | 1839.48 | 1838.02 | 6885.8 | 1                                                                            | 1962.2 | 78.1 | 11                        | K.SQIFSTASDNQPTVTIK.V    |
|                         | HsHeLa_Control-MG_Ti_20 | 3.0232 | 0.1851  | 1192.44 | 1192.36 | 7161   | 4                                                                            | 972.2  | 77.8 | 5                         | K.VYEGERPLTK.D           |
|                         | HsHeLa_Control-MG_Ti_20 | 3.9198 | 0.4359  | 1934.78 | 1935.19 | 6040.8 | 1                                                                            | 1490.3 | 70.6 | 7                         | K.DNHLLGTFDLTGIPPAPR.G   |
|                         | HsHeLa_Control-MG_Ti_20 | 2.7247 | 0.0837  | 1075.23 | 1075.17 | 7406.4 | 3                                                                            | 1089.1 | 87.5 | 1                         | K.ITITNDQNR.L            |
|                         | HsHeLa_Control-MG_Ti_10 | 3.6831 | 0.1824  | 1318.13 | 1317.44 | 4961.8 | 5                                                                            | 1216.9 | 90   | 3                         | R.NELESYAYSLK.N          |
| HsGST-MOCK_Ti_102.210   | 4.7365                  | 0.5019 | 2532.2  | 2532.72 | 8513.4  | 1      | 1319.3                                                                       | 55     | 3    | K.AVEEKIEWLESHQDADIEDFK.A |                          |
| HsHeLa_Control-MG_Ti_20 | 5.0625                  | 0.4038 | 1975.83 | 1976.11 | 9296.7  | 1      | 2667                                                                         | 80     | 6    | K.IEWLESHQDADIEDFK.A      |                          |
| HsFLAG-MOCK_300mM_T     | 4.1686                  | 0.3084 | 1656.02 | 1654.99 | 7985.2  | 1      | 1570.6                                                                       | 73.1   | 2    | K.KKELEEIVQPIISK.L        |                          |
| HsHeLa_Control-MG_Ti_20 | 4.2721                  | 0.2365 | 1398.4  | 1398.64 | 7233.7  | 1      | 1246                                                                         | 77.3   | 4    | K.ELEEIVQPIISK.L          |                          |
| HsFLAG-Control_HeLa_NE  | 4.9602                  | 0.515  | 2176.45 | 2177.28 | 8025.7  | 1      | 974.4                                                                        | 50     | 22   | K.LYGSAGPPPTGEEDTAEKDEL.- |                          |
| gij 20149594 ref N      | 53                      | 253    | 0.427   | 724     | 83264   | 5 U    | heat shock 90kDa protein 1, beta [Homo sapiens]                              |        |      |                           |                          |
|                         | HsFLAG-Control_HeLa_S1( | 3.2249 | 0.2813  | 1275.53 | 1276.39 | 5305.9 | 2                                                                            | 360.7  | 59.1 | 1                         | R.ELISNASDALDK.I         |
|                         | HsHeLa3_Ti_102.1735.173 | 2.3869 | 0.3371  | 1275.7  | 1276.39 | 3254.4 | 1                                                                            | 203.8  | 59.1 | 1                         | R.ELISNASDALDK.I         |
|                         | HsFLAG-Control_HeLa_NE  | 3.9623 | 0.3066  | 1276.13 | 1276.39 | 6399.8 | 1                                                                            | 1082.8 | 77.3 | 9                         | R.ELISNASDALDK.I         |
|                         | HsFLAG-Control_HeLa_S1( | 3.9813 | 0.2935  | 1276.45 | 1276.39 | 6438.2 | 1                                                                            | 1279.8 | 81.8 | 5                         | R.ELISNASDALDK.I         |
|                         | HsFLAG-Control_HeLa_S1( | 3.5279 | 0.3649  | 1545.79 | 1545.73 | 8298.4 | 1                                                                            | 1425.9 | 73.1 | 2                         | R.ELISNASDALDKIR.Y       |
|                         | HsFLAG-Control_HeLa_NE  | 4.3103 | 0.339   | 1809.78 | 1810.01 | 3724.2 | 1                                                                            | 845    | 73.3 | 7                         | K.IRYESLTDPSKLDLDSGK.E   |
|                         | HsFLAG-Control_HeLa_S1( | 2.678  | 0.2106  | 1039.44 | 1040.12 | 6287.3 | 3                                                                            | 663.1  | 75   | 4                         | R.YESLTDPSK.L            |
|                         | HsFLAG-Control_HeLa_NE  | 2.7149 | 0.2011  | 1039.45 | 1040.12 | 6815.8 | 1                                                                            | 815.2  | 81.2 | 4                         | R.YESLTDPSK.L            |
|                         | HsFLAG-Control_HeLa_NE  | 3.4808 | 0.2474  | 1040.52 | 1040.12 | 3725.7 | 4                                                                            | 589.2  | 87.5 | 2                         | R.YESLTDPSK.L            |
|                         | HsFLAG-Control_HeLa_NE  | 3.3925 | 0.3111  | 1542.17 | 1540.67 | 6161.9 | 1                                                                            | 885.9  | 69.2 | 3                         | R.YESLTDPSKLDLDSGK.E     |
|                         | HsFLAG-Control_HeLa_NE  | 4.4034 | 0.1007  | 1243.05 | 1243.45 | 5205.6 | 1                                                                            | 1215   | 86.4 | 20                        | K.ADLINNLGTIAK.S         |
|                         | HsFLAG-Control_HeLa_S1( | 5.634  | 0.452   | 2257.72 | 2257.29 | 8942.2 | 1                                                                            | 2330.1 | 65.8 | 16                        | K.HNDDEQYAWESSAGGSFTVR.A |
|                         | HsFLAG-Control_HeLa_S1( | 3.3042 | 0.2832  | 1312.18 | 1312.33 | 6777.7 | 1                                                                            | 777.6  | 77.8 | 15                        | K.EDQTEYLEER.R           |
|                         | HsFLAG-Control_HeLa_S1( | 3.5901 | 0.1509  | 1151.58 | 1152.25 | 8718.8 | 6                                                                            | 968.9  | 75   | 4                         | K.YIDQEELNK.T            |
|                         | HsFLAG-Control_HeLa_S1( | 5.789  | 0.4676  | 1847.93 | 1848.92 | 7437.7 | 1                                                                            | 1906.9 | 82.1 | 55                        | R.NPDDITQEEYGEFYK.S      |
|                         | HsFLAG-Control_HeLa_NE  | 4.7198 | 0.3685  | 1528.53 | 1528.66 | 7778.9 | 1                                                                            | 1591.3 | 79.2 | 15                        | K.SLTNDWEDHLAVK.H        |
|                         | HsFLAG-Control_HeLa_S1( | 3.1275 | 0.2534  | 1349.94 | 1349.49 | 5003.1 | 1                                                                            | 677    | 75   | 4                         | K.HFSVEGQLEFR.A          |
|                         | HsFLAG-Control_HeLa_NE  | 3.3786 | 0.1271  | 1237.49 | 1237.4  | 6036.8 | 3                                                                            | 1275.4 | 88.9 | 2                         | R.RAPFDLFENK.K           |
|                         | HsFLAG-Control_HeLa_S1( | 3.3884 | 0.178   | 1365.24 | 1365.58 | 8028.5 | 9                                                                            | 1119.5 | 75   | 1                         | R.RAPFDLFENKK.K          |
| Hs293FLP_TREX_Ti_104.1  | 2.2479                  | 0.1466 | 1020.64 | 1020.17 | 5697.7  | 6      | 461.6                                                                        | 71.4   | 1    | K.KFYEAFSK.N              |                          |
| HsFLAG-Control_HeLa_S1( | 2.191                   | 0.2143 | 1141.7  | 1142.21 | 5626.3  | 1      | 407                                                                          | 66.7   | 2    | K.LGIHEDSTNR.R            |                          |
| HsFLAG-Control_HeLa_NE  | 2.6341                  | 0.3242 | 1141.71 | 1142.21 | 5894.3  | 1      | 503.1                                                                        | 66.7   | 1    | K.LGIHEDSTNR.R            |                          |
| HsFLAG-Control_HeLa_NE  | 3.1679                  | 0.3528 | 1142.22 | 1142.21 | 6405.5  | 1      | 903.6                                                                        | 83.3   | 2    | K.LGIHEDSTNR.R            |                          |

|                    |                          |        |        |         |         |        |    |        |      |    |                                       |
|--------------------|--------------------------|--------|--------|---------|---------|--------|----|--------|------|----|---------------------------------------|
| *                  | HsFLAG-Control_HeLa_S1(  | 3.0058 | 0.3562 | 1142.84 | 1142.21 | 5931.7 | 1  | 1053.2 | 88.9 | 4  | K.LGIHEDSTNR.R                        |
|                    | HsFLAG-Control_HeLa_NE   | 2.5769 | 0.1754 | 1160.35 | 1161.3  | 7541.9 | 1  | 863.9  | 72.2 | 3  | K.SIYYITGESK.E                        |
|                    | HsFLAG-Control_HeLa_S1(  | 2.5148 | 0.221  | 1160.47 | 1161.3  | 6813.7 | 1  | 754.9  | 72.2 | 1  | K.SIYYITGESK.E                        |
|                    | HsFLAG-Control_HeLa_S1(  | 2.3138 | 0.1998 | 1160.52 | 1161.3  | 6133.2 | 1  | 537.6  | 66.7 | 2  | K.SIYYITGESK.E                        |
|                    | HsFLAG-Control_HeLa_NE   | 2.084  | 0.0823 | 1160.54 | 1161.3  | 9000.5 | 5  | 555.8  | 55.6 | 1  | K.SIYYITGESK.E                        |
|                    | HsFLAG-Control_HeLa_S1(  | 2.6506 | 0.2133 | 1160.58 | 1161.3  | 7847.6 | 1  | 879.2  | 72.2 | 1  | K.SIYYITGESK.E                        |
|                    | HsFLAG-Control_HeLa_S1(  | 2.9858 | 0.1922 | 1160.7  | 1161.3  | 8757.7 | 1  | 1028   | 72.2 | 2  | K.SIYYITGESK.E                        |
|                    | HsFLAG-Control_HeLa_S1(  | 3.2439 | 0.2195 | 1161.09 | 1161.3  | 4948   | 1  | 1060.4 | 83.3 | 2  | K.SIYYITGESK.E                        |
|                    | HsFLAG-Control_HeLa_S1(  | 2.7454 | 0.2521 | 1161.11 | 1161.3  | 5562.6 | 1  | 811.9  | 77.8 | 1  | K.SIYYITGESK.E                        |
|                    | HsFLAG-Control_HeLa_S1(  | 3.1987 | 0.2268 | 1161.16 | 1161.3  | 6138.1 | 1  | 1075.3 | 77.8 | 2  | K.SIYYITGESK.E                        |
|                    | HsFLAG-Control_HeLa_NE   | 3.2065 | 0.2692 | 1161.17 | 1161.3  | 4925.4 | 1  | 949.4  | 83.3 | 2  | K.SIYYITGESK.E                        |
|                    | HsFLAG-Control_HeLa_S1(  | 3.2209 | 0.2532 | 1161.46 | 1161.3  | 4530.4 | 1  | 961.4  | 83.3 | 2  | K.SIYYITGESK.E                        |
|                    | HsFLAG-Control_HeLa_S1(  | 2.625  | 0.2281 | 1161.56 | 1161.3  | 7341.6 | 1  | 676.9  | 66.7 | 2  | K.SIYYITGESK.E                        |
|                    | HsFLAG-Control_HeLa_NE   | 2.7698 | 0.2498 | 1161.93 | 1161.3  | 4283.3 | 1  | 897.3  | 83.3 | 1  | K.SIYYITGESK.E                        |
|                    | HsFLAG-Control_HeLa_S1(  | 2.9252 | 0.1111 | 1163.49 | 1161.3  | 4686.9 | 1  | 848.7  | 77.8 | 1  | K.SIYYITGESK.E                        |
|                    | HsFLAG-Control_HeLa_S1(  | 3.0728 | 0.3189 | 1251.13 | 1250.35 | 8877.3 | 1  | 1052.9 | 75   | 5  | K.EQVANSAFVER.V                       |
|                    | HsHeLa3_Ti_103.3231.323  | 3.1593 | 0.4305 | 2449.84 | 2449.74 | 4448.7 | 1  | 226.5  | 34.2 | 1  | R.GFEVVMTEPIDEYCVQQLK.E               |
|                    | HsFLAG-Control_HeLa_S1(  | 2.5834 | 0.3358 | 1416.47 | 1417.47 | 3338.4 | 1  | 318    | 63.6 | 2  | K.EGLELPEDEEEK.K                      |
|                    | HsFLAG-Control_HeLa_NE   | 2.8612 | 0.171  | 1417.26 | 1417.47 | 2994.8 | 7  | 388    | 68.2 | 6  | K.EGLELPEDEEEK.K                      |
|                    | HsFLAG-Control_HeLa_S1(  | 2.6126 | 0.0994 | 1010.16 | 1010.14 | 3542.1 | 5  | 518.3  | 85.7 | 1  | K.AKFENLCK.L                          |
| *                  | HsHeLa3_Ti_103.2956.295  | 2.7087 | 0.286  | 2433.38 | 2433.67 | 6914.6 | 2  | 351.7  | 32.5 | 1  | R.LVSSPCCIVTSTYGWTANMER.I             |
| *                  | HsFLAG-MOCK_300mM_T      | 4.1596 | 0.2568 | 1912.31 | 1912.2  | 6388.9 | 3  | 1328.9 | 70   | 1  | K.KHLEINPDHPIVETLR.Q                  |
| *                  | HsFLAG-Control_HeLa_S1(  | 4.1255 | 0.1738 | 1783.09 | 1784.03 | 7228.6 | 1  | 1746.9 | 78.6 | 3  | K.HLEINPDHPIVETLR.Q                   |
| *                  | HsFLAG-Control_HeLa_NE   | 4.4675 | 0.2901 | 1783.71 | 1784.03 | 6328.2 | 1  | 1390.7 | 75   | 11 | K.HLEINPDHPIVETLR.Q                   |
| *                  | HsFLAG-Control_HeLa_S1(  | 3.5668 | 0.2018 | 1784.68 | 1784.03 | 6557.3 | 2  | 1094.2 | 44.6 | 1  | K.HLEINPDHPIVETLR.Q                   |
| *                  | HsFLAG-MOCK_300mM_T      | 3.683  | 0.2081 | 3290.72 | 3288.73 | 6480.2 | 1  | 1160.1 | 30.2 | 1  | K.AVKDLVLLFETALLSSGFSLEDQPQTHSNR.I    |
| *                  | HsFLAG-Control_HeLa_S1(  | 5.8762 | 0.3863 | 2989.72 | 2990.34 | 9786.5 | 1  | 2002.2 | 35.6 | 4  | K.DLVLLFETALLSSGFSLEDQPQTHSNR.I       |
| *                  | HsFLAG-Control_HeLa_S1(  | 4.6037 | 0.4103 | 2990.16 | 2990.34 | 6256.4 | 1  | 767.9  | 40.4 | 4  | K.DLVLLFETALLSSGFSLEDQPQTHSNR.I       |
| *                  | HsFLAG-Control_HeLa_NE   | 5.1025 | 0.4334 | 2990.62 | 2990.34 | 7851.1 | 1  | 1532.4 | 33.7 | 2  | K.DLVLLFETALLSSGFSLEDQPQTHSNR.I       |
| *                  | HsFLAG-Control_HeLa_S1(  | 4.556  | 0.29   | 3534.29 | 3534.72 | 6727.8 | 1  | 621    | 25   | 7  | K.LGLGIDEVEVAEEPNAAVPDEIPPLEGDEDASR.M |
| gij 4506625 ref NF |                          | 20     | 51     | 0.426   | 148     | 16561  | 11 | U      |      |    | ribosomal protein L27a [Homo sapiens] |
| *                  | HsHeLa_Control-MG_Ti_10  | 2.0269 | 0.2256 | 943.53  | 944     | 4085.8 | 3  | 300.2  | 68.8 | 1  | R.GHVSHGHGR.I                         |
| *                  | HsHeLa_Control-MG_Ti_20  | 2.7813 | 0.2337 | 943.79  | 944     | 5133.3 | 1  | 991.6  | 87.5 | 1  | R.GHVSHGHGR.I                         |
|                    | HsHeLa_Control-MG_Ti_20  | 3.7612 | 0.3273 | 1586.23 | 1586.79 | 7246.6 | 1  | 934.2  | 66.7 | 2  | R.INFDKYHPGYFGK.V                     |
|                    | Hs293FLP_TREX_Ti_105.1   | 4.2859 | 0.2959 | 1579.51 | 1579.72 | 7288.4 | 1  | 1527.2 | 79.2 | 14 | K.RNQSFCTVNLDK.L                      |
|                    | Hs293FLP-MG_Ti_202.208   | 3.3477 | 0.1714 | 1422.94 | 1423.53 | 6221.8 | 1  | 1091.2 | 77.3 | 3  | R.NQSFCTVNLDK.L                       |
|                    | HsHeLa_Control-MG_Ti_20  | 4.5425 | 0.3747 | 2637.79 | 2637.92 | 6614.4 | 1  | 1247.8 | 39.3 | 1  | R.NQSFCTVNLDKLVTLVSEQTR.V             |
|                    | HsHeLa_Control-MG_Ti_10  | 2.4712 | 0.3148 | 1232.69 | 1233.41 | 3612.1 | 1  | 184.9  | 66.7 | 1  | K.LWTLVSEQTR.V                        |
|                    | Hs293FLP_Ti_302.2094.20  | 2.3419 | 0.233  | 1232.77 | 1233.41 | 3467.3 | 1  | 230.8  | 72.2 | 1  | K.LWTLVSEQTR.V                        |
|                    | HsGST-MOCK_Ti_403.250    | 3.3623 | 0.2492 | 1233.32 | 1233.41 | 6497.9 | 1  | 985.2  | 83.3 | 4  | K.LWTLVSEQTR.V                        |
|                    | HsHeLa_Control-MG_Ti_20  | 3.3591 | 0.1513 | 1233.5  | 1233.41 | 6031.9 | 1  | 975.7  | 83.3 | 7  | K.LWTLVSEQTR.V                        |
|                    | HsHeLa_Control_Ti_103.23 | 2.8413 | 0.185  | 1233.54 | 1233.41 | 7322.7 | 1  | 1095.5 | 83.3 | 1  | K.LWTLVSEQTR.V                        |
|                    | HsHeLa_Control-MG_Ti_20  | 3.358  | 0.2335 | 1354.58 | 1354.59 | 7382.3 | 2  | 1014.4 | 70.8 | 1  | K.NKTGAAPIIDVVR.S                     |
|                    | Hs293FLP_TREX_Ti_102.1   | 2.5364 | 0.2295 | 1111.44 | 1112.32 | 4427   | 3  | 277.2  | 60   | 2  | K.TGAAPIIDVVR.S                       |
|                    | Hs293FLP-MG_Ti_202.230   | 1.8274 | 0.186  | 1111.57 | 1112.32 | 5165.5 | 8  | 239.4  | 55   | 1  | K.TGAAPIIDVVR.S                       |
|                    | Hs293FLP-MG_Ti_202.230   | 4.0214 | 0.2665 | 1112.31 | 1112.32 | 3097.7 | 1  | 862    | 95   | 3  | K.TGAAPIIDVVR.S                       |
|                    | Hs293FLP-MG_Ti_102.221   | 2.9264 | 0.2592 | 1112.4  | 1112.32 | 3747   | 3  | 788.6  | 85   | 1  | K.TGAAPIIDVVR.S                       |
|                    | Hs293FLP-MG_Ti_102.222   | 2.4207 | 0.3054 | 1112.92 | 1112.32 | 4216.9 | 4  | 262.7  | 60   | 1  | K.TGAAPIIDVVR.S                       |
|                    | HsHeLa_Control-MG_Ti_20  | 3.3483 | 0.2642 | 1114.07 | 1112.32 | 3934.6 | 2  | 762.3  | 90   | 3  | K.TGAAPIIDVVR.S                       |

|                     |                                |        |        |         |         |         |     |        |      |    |                                                                                 |
|---------------------|--------------------------------|--------|--------|---------|---------|---------|-----|--------|------|----|---------------------------------------------------------------------------------|
|                     | Hs293FLP_TREX_Ti_102.1         | 3.0671 | 0.2844 | 1114.38 | 1112.32 | 3329.7  | 2   | 787.7  | 90   | 1  | K.TGAAPIIDVVR.S                                                                 |
|                     | Hs293FLP-MG_Ti_204.242         | 3.656  | 0.3221 | 1710.64 | 1710.97 | 7981.4  | 1   | 1109   | 63.3 | 2  | K.TGAAPIIDVVRSGYYK.V                                                            |
| gij 4506769 ref NF  |                                | 4      | 6      | 0.426   | 101     | 11457   | 6.8 | U      |      |    | S100 calcium-binding protein A7 [Homo sapiens]                                  |
|                     | HsFLAG-Control_293_Ti_10       | 2.1402 | 0.2399 | 1442.41 | 1442.53 | 4824    | 1   | 287.9  | 59.1 | 1  | K.ENFPNFLSACDK.K                                                                |
| *                   | HsFLAG-Control_MG_293_Ti_10    | 2.5991 | 0.1554 | 1257.36 | 1257.39 | 7390.8  | 8   | 794.6  | 70   | 1  | K.GTNYLADVFEK.K                                                                 |
| *                   | HsFLAG-Control_Hela_Ti_10      | 5.1539 | 0.4344 | 2312.75 | 2313.61 | 10264.6 | 1   | 1519.3 | 55.3 | 3  | K.KIDFSEFLSLLGDIATDYHK.Q                                                        |
| *                   | HsFLAG-MOCK_300mM_Ti_10        | 5.0005 | 0.3437 | 2314.36 | 2313.61 | 5667.1  | 1   | 1055.7 | 40.8 | 1  | K.KIDFSEFLSLLGDIATDYHK.Q                                                        |
| gij 7706337 ref NF  |                                | 5      | 8      | 0.424   | 177     | 20198   | 4.8 | U      |      |    | coatomer protein complex, subunit zeta 1 [Homo sapiens]                         |
| *                   | HsFLAG-MOCK_300mM_Ti_10        | 3.5959 | 0.2533 | 1674.57 | 1674.94 | 7679.9  | 1   | 1420.6 | 67.9 | 1  | K.AILILDNDGDRLF.AK.Y                                                            |
| *                   | HsFLAG-MOCK_300mM_Ti_10        | 3.965  | 0.3389 | 3609.82 | 3608.1  | 6219.2  | 1   | 652.5  | 25   | 1  | R.ALLENMEGLFLAVDEIVDGGVILESDPQQVVHR.V                                           |
| *                   | HsFLAG-Control_HeLa_S100_Ti_10 | 3.9879 | 0.2953 | 2469.63 | 2469.8  | 7809.9  | 4   | 652    | 28.4 | 1  | R.VALRGEDVPLTEQTVSQVLQSAK.E                                                     |
| *                   | HsFLAG-MOCK_300mM_Ti_10        | 4.0796 | 0.3561 | 2970.07 | 2968.38 | 7202.8  | 1   | 963.8  | 30.8 | 1  | R.VALRGEDVPLTEQTVSQVLQSAKEQIK.W                                                 |
| *                   | HsFLAG-Control_HeLa_S100_Ti_10 | 4.8599 | 0.4759 | 2029.98 | 2030.24 | 5546.1  | 1   | 1128.4 | 66.7 | 4  | R.GEDVPLTEQTVSQVLQSAK.E                                                         |
| gij 17986258 ref NF |                                | 6      | 18     | 0.424   | 151     | 16930   | 4.7 | U      |      |    | smooth muscle and non-muscle myosin alkali light chain isoform 1 [Homo sapiens] |
| gij 17986264 ref NF |                                | 6      | 18     | 0.408   | 157     | 17557   | 4.6 | U      |      |    | smooth muscle and non-muscle myosin alkali light chain isoform 3 [Homo sapiens] |
| gij 17986262 ref NF |                                | 6      | 18     | 0.552   | 116     | 12939   | 4.9 | U      |      |    | smooth muscle and non-muscle myosin alkali light chain isoform 4 [Homo sapiens] |
| gij 17986260 ref NF |                                | 6      | 18     | 0.552   | 116     | 12970   | 4.7 | U      |      |    | smooth muscle and non-muscle myosin alkali light chain isoform 2 [Homo sapiens] |
|                     | HsFLAG-MOCK_150mM_Ti_10        | 3.9347 | 0.3169 | 1355.23 | 1355.53 | 4693.6  | 1   | 1052.5 | 79.2 | 5  | R.ALGQNPTNAEVLK.V                                                               |
|                     | HsFLAG-MOCK_300mM_Ti_10        | 2.8889 | 0.2903 | 1431.99 | 1431.65 | 5480.3  | 1   | 695.5  | 66.7 | 1  | K.VLGNPKSDEMNVK.V                                                               |
|                     | HsFLAG-MOCK_150mM_Ti_10        | 3.7269 | 0.3471 | 1888.68 | 1889.26 | 4645    | 1   | 996.1  | 66.7 | 1  | K.VLDFEHFLPMLQTVAK.N                                                            |
|                     | HsFLAG-Control_HeLa_NE         | 4.1888 | 0.4122 | 1545.31 | 1545.6  | 8559.4  | 1   | 1553.4 | 75   | 8  | K.DQGTIEDYVEGLR.V                                                               |
|                     | HsHeLa_Control-MG_Ti_10        | 2.7952 | 0.2864 | 995.92  | 996.195 | 5082.8  | 2   | 789.5  | 75   | 1  | R.HVLVTLGEK.M                                                                   |
|                     | HsFLAG-MOCK_150mM_Ti_10        | 3.0925 | 0.2235 | 996.3   | 996.195 | 3156.8  | 6   | 737.7  | 93.8 | 2  | R.HVLVTLGEK.M                                                                   |
| gij 6678271 ref NF  |                                | 11     | 34     | 0.423   | 414     | 44740   | 6.2 | U      |      |    | TAR DNA binding protein [Homo sapiens]                                          |
| *                   | HsFLAG-Control_HeLa_NE         | 3.5922 | 0.2004 | 3878.98 | 3877.13 | 8708.6  | 3   | 426.4  | 18.6 | 1  | R.VTEDENDIEIPSEDDGTVLLSTVTAQFPGACGLR.Y                                          |
| *                   | HsHeLa3_Ti_106.1956.195        | 3.0358 | 0.3403 | 1311.67 | 1311.47 | 5737.9  | 1   | 559.3  | 66.7 | 2  | R.YRNPVSQCMR.G                                                                  |
| *                   | HsFLAG-Control_HeLa_NE         | 4.0612 | 0.2213 | 2625.49 | 2626.03 | 9140.9  | 6   | 656.8  | 27.2 | 1  | R.LVEGILHAPDAGWGNLVVVVNYPK.D                                                    |
| *                   | HsHeLa3_Ti_105.3511.351        | 4.8758 | 0.3716 | 2627    | 2626.03 | 4184    | 1   | 786.7  | 52.2 | 3  | R.LVEGILHAPDAGWGNLVVVVNYPK.D                                                    |
| *                   | HsHeLa3_Ti_103.3411.341        | 4.3562 | 0.368  | 1342.77 | 1342.62 | 6778.8  | 1   | 1604.2 | 81.8 | 4  | K.TSDLIVLGLPWK.T                                                                |
| *                   | HsHeLa3_Ti_102.1495.149        | 2.5122 | 0.0933 | 1145.48 | 1145.25 | 4300.7  | 2   | 688.7  | 75   | 1  | R.FTEYETQVK.V                                                                   |
| *                   | HsGST-MOCK_Ti_103.415          | 5.6939 | 0.4638 | 3702.85 | 3704.08 | 9339.2  | 1   | 1343   | 30.2 | 2  | R.CTEDMTEDELREFFSQYGDVMDVFIPKPF.R.A                                             |
| *                   | HsHeLa3_Ti_105.4090.409        | 2.9484 | 0.2666 | 2324.77 | 2323.67 | 8860.2  | 1   | 724.5  | 44.4 | 1  | R.EFFSQYGDVMDVFIPKPF.R.A                                                        |
| *                   | HsHeLa3_Ti_106.3274.327        | 4.5157 | 0.4575 | 2673.96 | 2673.99 | 6529.5  | 1   | 897    | 47.8 | 1  | R.AFAFVTFADDQIAQSLCGEDLI.K.G                                                    |
| *                   | HsHeLa3_Ti_105.1515.151        | 2.8922 | 0.2159 | 1254.47 | 1252.41 | 5236.5  | 1   | 1010.5 | 77.3 | 1  | K.GISVHISNAEPK.H                                                                |
| *                   | HsFLAG-Control_HeLa_NE         | 4.8408 | 0.3829 | 1728.77 | 1727.79 | 7798.1  | 1   | 1941.1 | 70.6 | 17 | R.FGGNPGGFGNQQGGFGNSR.G                                                         |
| gij 40807496 ref NF |                                | 57     | 281    | 0.421   | 1048    | 116954  | 6.7 | U      |      |    | OTU domain containing 4 protein isoform 1 [Homo sapiens]                        |
|                     | HsHeLa_Control-MG_Ti_10        | 2.7398 | 0.1852 | 1064.55 | 1064.26 | 4932.8  | 1   | 965.6  | 92.9 | 1  | -.MACIHYLR.E                                                                    |
|                     | Hs283FLP_Ti_105.2811.28        | 4.5662 | 0.3562 | 1711.28 | 1709.89 | 4837.9  | 1   | 1506   | 88.5 | 1  | K.FEAFIEGSFEEYLK.R                                                              |
|                     | HsHeLa_Control-MG_Ti_20        | 5.5435 | 0.3195 | 2852.31 | 2853.16 | 8571.7  | 1   | 1906.7 | 38   | 4  | R.KDFIYREPNVSPSQVTENNPF.K.V                                                     |
|                     | Hs293FLP-MG_Ti_203.265         | 4.5094 | 0.4619 | 2723.61 | 2724.99 | 10002.6 | 1   | 1185.9 | 47.7 | 2  | K.DFIYREPNVSPSQVTENNPF.K.V                                                      |
|                     | Hs293FLP-MG_Ti_203.264         | 5.5313 | 0.3917 | 2724.75 | 2724.99 | 6590.2  | 1   | 1206.4 | 37.5 | 2  | K.DFIYREPNVSPSQVTENNPF.K.V                                                      |
|                     | Hs283FLP_Ti_106.2255.22        | 4.4146 | 0.3525 | 2725.34 | 2724.99 | 8994.2  | 1   | 989.3  | 47.7 | 3  | K.DFIYREPNVSPSQVTENNPF.K.V                                                      |
|                     | Hs283FLP_Ti_106.2259.22        | 4.9365 | 0.2948 | 2727.63 | 2724.99 | 6145    | 1   | 1259   | 39.8 | 3  | K.DFIYREPNVSPSQVTENNPF.K.V                                                      |
|                     | HsHeLa-FLAG-IP_S100_Ti_10      | 2.8022 | 0.3616 | 1917.32 | 1917.04 | 5104    | 1   | 275.1  | 40.6 | 1  | R.EPNVSPSQVTENNPF.K.V                                                           |
|                     | HsHeLa_Control-MG_Ti_20        | 4.6751 | 0.4264 | 2152.54 | 2153.45 | 9288.9  | 1   | 1796.3 | 64.7 | 6  | K.VLLCFSGNGHYDIVYPIK.Y                                                          |
|                     | Hs293FLP-MG_Ti_202.423         | 4.7272 | 0.3424 | 2065.57 | 2065.31 | 8056.4  | 1   | 1709.5 | 65.6 | 15 | K.ESSAMCQSLLYELLYEK.V                                                           |
| *                   | Hs283FLP_Ti_104.1659.16        | 4.6078 | 0.4296 | 1974.74 | 1975.21 | 5963    | 1   | 649.9  | 50   | 12 | K.TAAAAADVNGFKPLSGNELK.N                                                        |
| *                   | HsF-IP-293-MG_Ti_102.14        | 3.198  | 0.1344 | 1261.25 | 1260.35 | 5382.1  | 1   | 868.8  | 77.3 | 2  | K.NNGNSTSLPLSR.K                                                                |

|                    |                          |        |        |         |         |        |       |                                                            |      |                                            |
|--------------------|--------------------------|--------|--------|---------|---------|--------|-------|------------------------------------------------------------|------|--------------------------------------------|
| *                  | Hs283FLP_Ti_102.2330.23  | 3.2622 | 0.1388 | 1194.39 | 1194.37 | 3228.1 | 1     | 637.7                                                      | 87.5 | 5 R.NVEYEIWLK.S                            |
| *                  | Hs293FLP-MG_Ti_203.228   | 3.4103 | 0.4081 | 1784.36 | 1785.95 | 6312.2 | 1     | 614.4                                                      | 63.3 | 1 K.RDYISIAAGLQYEVGDK.C                    |
| *                  | HsHeLa_Control-MG_Ti_10  | 4.4468 | 0.371  | 2466.01 | 2466.75 | 6090.6 | 1     | 835                                                        | 47.7 | 3 K.FLNADVQGIHSENGPVLVEELGK.K              |
| *                  | Hs293FLP-MG_Ti_203.288   | 4.5276 | 0.393  | 2466.48 | 2466.75 | 8750.5 | 1     | 1457.6                                                     | 52.3 | 2 K.FLNADVQGIHSENGPVLVEELGK.K              |
| *                  | Hs293FLP-MG_Ti_203.289   | 5.22   | 0.38   | 2466.65 | 2466.75 | 4542.9 | 1     | 1475.8                                                     | 45.5 | 2 K.FLNADVQGIHSENGPVLVEELGK.K              |
| *                  | HsHeLa_Control-MG_Ti_20  | 5.4819 | 0.449  | 2467.15 | 2466.75 | 4855.5 | 1     | 1533.6                                                     | 45.5 | 2 K.FLNADVQGIHSENGPVLVEELGK.K              |
| *                  | HsHeLa_Control-MG_Ti_10  | 4.9153 | 0.3775 | 2594.35 | 2594.93 | 6537.4 | 1     | 989.1                                                      | 50   | 2 K.FLNADVQGIHSENGPVLVEELGKK.H             |
| *                  | Hs293FLP_Ti_304.2311.23  | 5.222  | 0.4767 | 2594.57 | 2594.93 | 5237.6 | 1     | 1164.6                                                     | 38   | 7 K.FLNADVQGIHSENGPVLVEELGKK.H             |
| *                  | Hs293FLP_TREX_Ti_105.1   | 4.1628 | 0.3551 | 1839.34 | 1838.93 | 5477.2 | 1     | 1079.9                                                     | 73.3 | 5 K.KPSTSGQNFHSDVDYR.G                     |
| *                  | Hs283FLP_Ti_105.1333.13  | 3.5743 | 0.2821 | 1839.8  | 1838.93 | 4188.4 | 2     | 831.3                                                      | 48.3 | 1 K.KPSTSGQNFHSDVDYR.G                     |
| *                  | Hs283FLP_Ti_105.1325.13  | 4.677  | 0.4081 | 1839.96 | 1838.93 | 5729.2 | 1     | 1153.5                                                     | 73.3 | 8 K.KPSTSGQNFHSDVDYR.G                     |
| *                  | HsHeLa_Control-MG_Ti_20  | 3.1878 | 0.3513 | 1603.27 | 1603.65 | 2553   | 1     | 328.7                                                      | 64.3 | 3 R.QHAFSSHSSGSQSQK.F                      |
| *                  | HsHeLa_Control-MG_Ti_20  | 2.7293 | 0.1852 | 1391.28 | 1391.44 | 5615.2 | 5     | 660.6                                                      | 70   | 1 R.ERVEDFDHTSR.E                          |
| *                  | HsHeLa_Control-MG_Ti_10  | 2.9839 | 0.3008 | 1107.62 | 1106.14 | 5918.6 | 2     | 919.3                                                      | 87.5 | 2 R.VEDFDHTSR.E                            |
| *                  | Hs293FLP_TREX_Ti_102.1   | 3.5379 | 0.282  | 1428.46 | 1428.5  | 6344.6 | 1     | 985.7                                                      | 77.3 | 13 R.ESNYFGLSPEER.R                        |
| *                  | HsHeLa_Control-MG_Ti_20  | 6.4409 | 0.4332 | 3913.69 | 3913.17 | 7268.7 | 1     | 1473.7                                                     | 30.9 | 15 R.LLYEIQRNDEQAFFALSSSSVNSQASQSSNPCVQR.K |
| *                  | Hs293FLP-MG_Ti_202.222   | 4.135  | 0.4617 | 2882.1  | 2882.98 | 8362.9 | 1     | 1282.6                                                     | 46.2 | 3 R.DEQAFFALSSSSVNSQASQSSNPCVQR.K          |
| *                  | Hs293FLP-MG_Ti_204.115   | 3.0374 | 0.2495 | 1236.47 | 1237.32 | 5705.2 | 4     | 528.3                                                      | 65   | 5 K.DSIHGHSQLDK.R                          |
| *                  | HsHeLa_Control-MG_Ti_20  | 2.244  | 0.358  | 1236.47 | 1237.32 | 3578.2 | 1     | 244.5                                                      | 55   | 1 K.DSIHGHSQLDK.R                          |
| *                  | Hs293FLP-MG_Ti_204.117   | 3.2737 | 0.2817 | 1237.16 | 1237.32 | 6010.5 | 8     | 709.9                                                      | 70   | 3 K.DSIHGHSQLDK.R                          |
| *                  | HsHeLa_Control-MG_Ti_10  | 2.7689 | 0.2173 | 1237.65 | 1237.32 | 5595.5 | 3     | 678.4                                                      | 70   | 1 K.DSIHGHSQLDK.R                          |
| *                  | HsHeLa_Control-MG_Ti_20  | 2.758  | 0.1907 | 1237.73 | 1237.32 | 5559.4 | 6     | 587.9                                                      | 70   | 2 K.DSIHGHSQLDK.R                          |
| *                  | HsHeLa_Control-MG_Ti_10  | 3.0561 | 0.3165 | 1237.73 | 1237.32 | 4442.5 | 1     | 482.8                                                      | 70   | 1 K.DSIHGHSQLDK.R                          |
| *                  | HsFLAG-Control_HeLa_NE   | 5.2543 | 0.3451 | 1615.31 | 1615.74 | 8101.8 | 1     | 2628.9                                                     | 88.5 | 12 K.RPEPSTLENITDDK.Y                      |
| *                  | Hs293FLP-MG_Ti_204.183   | 5.9717 | 0.4364 | 2536.41 | 2536.76 | 9013.4 | 1     | 1676.4                                                     | 39.8 | 2 K.RPEPSTLENITDDKYATVSSPSK.S              |
| *                  | Hs283FLP_Ti_105.1737.17  | 3.7477 | 0.2837 | 2131.85 | 2132.38 | 3646.9 | 1     | 452.9                                                      | 58.3 | 7 R.AIVPPYSLCQTGEDLPKDK.N                  |
| *                  | Hs283FLP_Ti_105.2415.24  | 1.8529 | 0.1275 | 971.55  | 972.175 | 3919.5 | 3     | 355.4                                                      | 78.6 | 1 R.FFFNLGVK.A                             |
| *                  | Hs293FLP-MG_Ti_202.379   | 3.0321 | 0.3044 | 2669.77 | 2670.97 | 7062.4 | 1     | 244.1                                                      | 32.6 | 1 R.QNIVLPSDEKGEGLDLSLENLDLSK.D            |
| *                  | Hs283FLP_Ti_106.2488.24  | 3.3996 | 0.2764 | 2671.93 | 2670.97 | 8215.5 | 1     | 533.5                                                      | 37   | 3 R.QNIVLPSDEKGEGLDLSLENLDLSK.D            |
| *                  | HsF-IP-293-MG_Ti_106.24  | 4.0771 | 0.3918 | 2672.9  | 2670.97 | 4988.7 | 1     | 375.8                                                      | 28.3 | 2 R.QNIVLPSDEKGEGLDLSLENLDLSK.D            |
| *                  | Hs283FLP_Ti_102.2661.26  | 5.1598 | 0.359  | 1545.82 | 1546.72 | 6886.4 | 1     | 1555.9                                                     | 76.9 | 17 K.GELDLSLENLDLSK.D                      |
| *                  | Hs293FLP-MG_Ti_202.209   | 5.3644 | 0.4781 | 1669.36 | 1669.71 | 6162.9 | 1     | 1799.6                                                     | 85.7 | 22 K.DCGSVSTVDEFPEAR.G                     |
| *                  | Hs293FLP-MG_Ti_205.147   | 5.5247 | 0.3896 | 2117.81 | 2119.26 | 5280.2 | 1     | 1054                                                       | 63.2 | 5 R.GEHVHSLPEASVSSKPDEGR.T                 |
| *                  | HsHeLa_Control-MG_Ti_20  | 5.1877 | 0.4334 | 2118.94 | 2119.26 | 7729.3 | 1     | 2098.4                                                     | 48.7 | 1 R.GEHVHSLPEASVSSKPDEGR.T                 |
| *                  | HsHeLa_Control-MG_Ti_20  | 4.5442 | 0.3672 | 2119.44 | 2119.26 | 7039.7 | 1     | 1046.8                                                     | 60.5 | 1 R.GEHVHSLPEASVSSKPDEGR.T                 |
| *                  | Hs293FLP-MG_Ti_205.147   | 5.2588 | 0.2662 | 2119.58 | 2119.26 | 7562.5 | 1     | 1852.4                                                     | 46.1 | 1 R.GEHVHSLPEASVSSKPDEGR.T                 |
| *                  | HsHeLa_Control-MG_Ti_20  | 3.9833 | 0.3479 | 3036.37 | 3037.19 | 7259.6 | 1     | 671.5                                                      | 26.9 | 1 R.GEHVHSLPEASVSSKPDEGRTEQSSQTR.K         |
| *                  | HsHeLa_Control-MG_Ti_20  | 2.9412 | 0.2894 | 1567.59 | 1568.81 | 5351.9 | 1     | 911.4                                                      | 63.3 | 1 R.KADTALASIPPVAEGK.A                     |
| *                  | HsFlag1P_Ti_105.2013.201 | 5.0761 | 0.4361 | 1568.44 | 1568.81 | 5418.4 | 1     | 1711.8                                                     | 80   | 8 R.KADTALASIPPVAEGK.A                     |
| *                  | Hs293FLP_Ti_303.1635.16  | 3.0745 | 0.3587 | 1568.77 | 1568.81 | 5263   | 1     | 910.2                                                      | 63.3 | 1 R.KADTALASIPPVAEGK.A                     |
| *                  | Hs293FLP_Ti_303.1627.16  | 4.7038 | 0.3812 | 1568.75 | 1568.81 | 4376.1 | 1     | 1459                                                       | 80   | 13 R.KADTALASIPPVAEGK.A                    |
| *                  | Hs283FLP_Ti_104.1517.15  | 5.0318 | 0.4162 | 1568.87 | 1568.81 | 4516.6 | 1     | 1258.2                                                     | 76.7 | 7 R.KADTALASIPPVAEGK.A                     |
| *                  | HsF-IP-293-MG_Ti_102.14  | 4.8903 | 0.3991 | 1546.65 | 1546.63 | 5001.1 | 1     | 1214.4                                                     | 76.7 | 31 K.TAADVVSPGANSVDSR.V                    |
| *                  | HsHeLa_Control-MG_Ti_10  | 4.7565 | 0.4098 | 2360.24 | 2359.51 | 6237.1 | 1     | 936.9                                                      | 55.3 | 1 R.VQRPKEESSEDENEVSNILR.S                 |
| *                  | HsHeLa_Control-MG_Ti_20  | 3.4331 | 0.2524 | 1311.92 | 1311.36 | 8510.2 | 1     | 1055.3                                                     | 77.8 | 3 R.SRDEGYQYHR.N                           |
| gij 50053795 ref N |                          | 49     | 329    | 0.421   | 611     | 69151  | 5.7 U | eukaryotic translation initiation factor 4B [Homo sapiens] |      |                                            |
| *                  | Hs283FLP_Ti_104.2507.25  | 5.7692 | 0.5059 | 2278.14 | 2277.45 | 6944.4 | 1     | 1351.5                                                     | 56.8 | 15 K.TISLTDFLAEDGGTGGGSTYVSK.P             |
| *                  | HsHeLa_Control-MG_Ti_20  | 5.6496 | 0.4064 | 3226.89 | 3226.26 | 7621.2 | 1     | 1217                                                       | 31.5 | 7 K.PVSWADETDDLEGDVSTTWHNSNDDVYR.A         |

|                   |                           |        |        |         |         |         |     |        |      |    |                                     |
|-------------------|---------------------------|--------|--------|---------|---------|---------|-----|--------|------|----|-------------------------------------|
| *                 | HsHeLa_Control-MG_Ti_20   | 5.8178 | 0.4607 | 2340.32 | 2342.61 | 6469.7  | 1   | 1400.1 | 62.5 | 7  | K.SPPYTAFLGNLPYDVTEESIK.E           |
| *                 | HsF-IP-293_Ti_205.3410.34 | 5.233  | 0.4817 | 2340.73 | 2342.61 | 5356.4  | 1   | 1027   | 60   | 37 | K.SPPYTAFLGNLPYDVTEESIK.E           |
| *                 | HsF-IP-293-MG_Ti_102.344  | 4.8066 | 0.4031 | 2340.83 | 2342.61 | 5223.8  | 1   | 996.1  | 60   | 24 | K.SPPYTAFLGNLPYDVTEESIK.E           |
| *                 | HsFLAG-Control_HeLa_NE    | 4.6212 | 0.4063 | 2341.66 | 2342.61 | 6614.1  | 1   | 842.5  | 50   | 23 | K.SPPYTAFLGNLPYDVTEESIK.E           |
| *                 | HsF-IP-293-MG_Ti_102.324  | 5.7263 | 0.3338 | 2342.06 | 2342.61 | 5372.1  | 1   | 1277.9 | 43.8 | 2  | K.SPPYTAFLGNLPYDVTEESIK.E           |
| *                 | Hs293FLP-MG_Ti_202.4064   | 3.9763 | 0.279  | 2342.09 | 2342.61 | 6538.7  | 1   | 642.7  | 45   | 5  | K.SPPYTAFLGNLPYDVTEESIK.E           |
| *                 | Hs293FLP-MG_Ti_202.4137   | 5.3127 | 0.2303 | 2342.14 | 2342.61 | 7799.7  | 1   | 1510.1 | 40   | 1  | K.SPPYTAFLGNLPYDVTEESIK.E           |
| *                 | Hs283FLP_Ti_102.3301.334  | 4.2878 | 0.187  | 2342.59 | 2342.61 | 5413.1  | 6   | 869.2  | 38.8 | 1  | K.SPPYTAFLGNLPYDVTEESIK.E           |
| *                 | HsGST-MOCK_Ti_403.4071    | 2.9562 | 0.3052 | 2342.6  | 2342.61 | 6920.3  | 1   | 675.5  | 47.5 | 2  | K.SPPYTAFLGNLPYDVTEESIK.E           |
| *                 | HsHeLa_Control-MG_Ti_20   | 4.2741 | 0.2694 | 2342.76 | 2342.61 | 6315.9  | 1   | 1209   | 41.2 | 1  | K.SPPYTAFLGNLPYDVTEESIK.E           |
| *                 | HsHeLa_Control-MG_Ti_10   | 3.5693 | 0.2058 | 2343.23 | 2342.61 | 4874.3  | 3   | 542.4  | 32.5 | 1  | K.SPPYTAFLGNLPYDVTEESIK.E           |
| *                 | HsHeLa_Control-MG_Ti_20   | 3.738  | 0.3532 | 2920.82 | 2922.26 | 5277.5  | 1   | 379.1  | 37.5 | 4  | K.SPPYTAFLGNLPYDVTEESIKEFFR.G       |
| *                 | HsHeLa_Control-MG_Ti_20   | 4.5319 | 0.3365 | 2921.76 | 2922.26 | 8031.1  | 2   | 642.2  | 26   | 5  | K.SPPYTAFLGNLPYDVTEESIKEFFR.G       |
| *                 | HsHeLa_Control-MG_Ti_10   | 4.1955 | 0.2616 | 2922.72 | 2922.26 | 5147.4  | 1   | 694.3  | 33.3 | 4  | K.SPPYTAFLGNLPYDVTEESIKEFFR.G       |
| *                 | Hs283FLP_Ti_103.1448.144  | 2.9941 | 0.1446 | 830.34  | 829.975 | 4592    | 1   | 925.1  | 85.7 | 2  | R.GLNISAVR.L                        |
| *                 | Hs283FLP_Ti_103.1450.144  | 1.9013 | 0.1525 | 830.63  | 829.975 | 3624.1  | 5   | 212.7  | 71.4 | 1  | R.GLNISAVR.L                        |
| *                 | HsF-IP-293-MG_Ti_106.294  | 3.7623 | 0.2783 | 2947.08 | 2948.17 | 9360.1  | 1   | 912.8  | 28.8 | 1  | K.GFGYAEFEDLDSLLSALSLSLNEESLGNR.R   |
| *                 | Hs293FLP-MG_Ti_205.4874   | 5.6655 | 0.4802 | 2947.56 | 2948.17 | 12358.5 | 1   | 2678.3 | 37.5 | 4  | K.GFGYAEFEDLDSLLSALSLSLNEESLGNR.R   |
| *                 | HsF-IP-293_Ti_206.3102.37 | 5.1124 | 0.4269 | 2947.89 | 2948.17 | 7201.5  | 1   | 1037.6 | 44.2 | 12 | K.GFGYAEFEDLDSLLSALSLSLNEESLGNR.R   |
| *                 | Hs293FLP-MG_Ti_205.4864   | 5.5193 | 0.4976 | 2947.9  | 2948.17 | 7586.4  | 1   | 1325.9 | 48.1 | 13 | K.GFGYAEFEDLDSLLSALSLSLNEESLGNR.R   |
| *                 | HsF-IP-293-MG_Ti_106.294  | 5.8379 | 0.3712 | 2948.17 | 2948.17 | 7100.4  | 1   | 1202.8 | 46.2 | 20 | K.GFGYAEFEDLDSLLSALSLSLNEESLGNR.R   |
| *                 | HsHeLa_Control-MG_Ti_20   | 5.3347 | 0.4353 | 2948.3  | 2948.17 | 8936.1  | 1   | 1235.7 | 44.2 | 26 | K.GFGYAEFEDLDSLLSALSLSLNEESLGNR.R   |
| *                 | HsHeLa_Control-MG_Ti_20   | 6.7576 | 0.4246 | 2949    | 2948.17 | 9140.7  | 1   | 1553.7 | 35.6 | 4  | K.GFGYAEFEDLDSLLSALSLSLNEESLGNR.R   |
| *                 | Hs283FLP_Ti_105.4083.404  | 6.9287 | 0.4098 | 2949.43 | 2948.17 | 9028.5  | 1   | 1919.1 | 35.6 | 7  | K.GFGYAEFEDLDSLLSALSLSLNEESLGNR.R   |
| *                 | Hs293FLP-MG_Ti_205.4644   | 4.225  | 0.3772 | 3103.85 | 3104.36 | 6326.1  | 2   | 621.5  | 24.1 | 7  | K.GFGYAEFEDLDSLLSALSLSLNEESLGNRR.I  |
| *                 | HsHeLa_Control-MG_Ti_20   | 1.9277 | 0.218  | 1357.47 | 1358.49 | 3621.4  | 7   | 206.2  | 45.5 | 1  | R.IRVADVADQAQDK.D                   |
| *                 | Hs293FLP_TREX_Ti_103.1    | 4.3476 | 0.2835 | 1358.54 | 1358.49 | 5398.8  | 1   | 1432.5 | 86.4 | 15 | R.IRVADVADQAQDK.D                   |
| *                 | HsHeLa_Control-MG_Ti_10   | 4.2372 | 0.3066 | 1359.75 | 1358.49 | 5345.4  | 1   | 1433.2 | 86.4 | 4  | R.IRVADVADQAQDK.D                   |
| *                 | HsHeLa_Control-MG_Ti_10   | 3.0468 | 0.2241 | 1509.87 | 1509.53 | 3998.1  | 2   | 694.6  | 77.3 | 2  | R.NRSDKTDTDWR.A                     |
| *                 | HsHeLa_Control-MG_Ti_10   | 2.3967 | 0.3049 | 1239.59 | 1239.24 | 3773    | 1   | 325.2  | 55.6 | 1  | R.DSDKTDTDWR.A                      |
| *                 | HsHeLa_Control-MG_Ti_20   | 3.7084 | 0.2757 | 1610.56 | 1608.71 | 4292.4  | 1   | 690.7  | 69.2 | 13 | R.ARPATDSFDDYPPR.R                  |
| *                 | HsHeLa_Control-MG_Ti_20   | 2.728  | 0.2542 | 914.35  | 914.012 | 5469.5  | 1   | 933.2  | 100  | 2  | R.RAFGSGYR.R                        |
| *                 | HsHeLa_Control-MG_Ti_20   | 2.5395 | 0.2107 | 1531.5  | 1532.74 | 4073.1  | 8   | 232    | 46.7 | 2  | R.AASIFGGAKPVDTAAR.E                |
| *                 | HsHeLa_Control-MG_Ti_20   | 4.3197 | 0.3449 | 1532.07 | 1532.74 | 7292.4  | 2   | 926.6  | 63.3 | 13 | R.AASIFGGAKPVDTAAR.E                |
| *                 | HsFLAG-Control_HeLa_S10   | 3.8316 | 0.2185 | 1533.4  | 1532.74 | 7185.3  | 4   | 679.6  | 53.3 | 10 | R.AASIFGGAKPVDTAAR.E                |
| *                 | HsFlag1P_Ti_106.1958.195  | 3.3734 | 0.0988 | 1300.44 | 1300.5  | 9340    | 1   | 1180.4 | 77.8 | 1  | R.LQKEQEKLR.Q                       |
| *                 | HsF-IP-293-MG_Ti_102.124  | 3.1447 | 0.1388 | 1049.16 | 1048.14 | 4157.5  | 4   | 595    | 81.2 | 5  | K.SLENETLNK.E                       |
| *                 | HsHeLa_Control-MG_Ti_20   | 5.7495 | 0.4263 | 3220.02 | 3220.48 | 7338.1  | 1   | 1240.3 | 32.4 | 9  | K.SLENETLNKEEDCHSPTSKPPKPDQPLK.V    |
| *                 | HsHeLa_Control-MG_Ti_20   | 3.879  | 0.3358 | 2190.58 | 2191.37 | 7318.1  | 1   | 614.8  | 52.8 | 4  | K.EEDCHSPTSKPPKPDQPLK.V             |
| *                 | HsF-IP-293-MG_Ti_106.184  | 2.9151 | 0.1527 | 2190.62 | 2191.37 | 7768.7  | 2   | 363    | 38.9 | 1  | K.EEDCHSPTSKPPKPDQPLK.V             |
| *                 | Hs293FLP-MG_Ti_205.1394   | 2.8528 | 0.2023 | 2190.68 | 2191.37 | 8939.4  | 3   | 526.2  | 44.4 | 1  | K.EEDCHSPTSKPPKPDQPLK.V             |
| *                 | HsF-IP-293-MG_Ti_106.184  | 4.1344 | 0.2635 | 2190.98 | 2191.37 | 9671.7  | 1   | 991.7  | 33.3 | 1  | K.EEDCHSPTSKPPKPDQPLK.V             |
| *                 | HsHeLa_Control-MG_Ti_20   | 3.5284 | 0.1394 | 2191.7  | 2191.37 | 9469.2  | 2   | 1119.2 | 37.5 | 1  | K.EEDCHSPTSKPPKPDQPLK.V             |
| *                 | HsHeLa_Control-MG_Ti_10   | 3.5459 | 0.2349 | 2192.67 | 2191.37 | 8330.2  | 1   | 1072.6 | 36.1 | 1  | K.EEDCHSPTSKPPKPDQPLK.V             |
| *                 | HsHeLa_Control-MG_Ti_20   | 2.7585 | 0.2571 | 1295.25 | 1295.4  | 3804    | 7   | 430.7  | 62.5 | 2  | K.VAPAQPSEEGPGR.K                   |
| *                 | HsHeLa_Control-MG_Ti_20   | 3.7948 | 0.1945 | 1446.2  | 1446.62 | 8756.5  | 1   | 1746.9 | 79.2 | 2  | R.KDENKVDGMNAPK.G                   |
| *                 | HsHeLa-FLAG-IP_S100_Ti_   | 5.8837 | 0.4864 | 2076.24 | 2077.03 | 7955    | 1   | 1379.5 | 61.1 | 2  | K.YAALSVDGEDENEGEDYAE.-             |
| gi 4506671 ref NF |                           | 5      | 14     | 0.417   | 115     | 11665   | 4.5 | U      |      |    | ribosomal protein P2 [Homo sapiens] |
| *                 | HsFLAG-Control_293_Ti_10  | 3.6283 | 0.2844 | 1869.45 | 1870.11 | 10083.1 | 1   | 1600.3 | 58.3 | 4  | R.YVASYLLAALGGNSSPSAK.D             |

|                   |                          |        |        |         |         |         |      |        |      |    |                                                                         |
|-------------------|--------------------------|--------|--------|---------|---------|---------|------|--------|------|----|-------------------------------------------------------------------------|
| *                 | Hs293FLP_TREX_Ti_106.2   | 4.9181 | 0.3805 | 1901.62 | 1902.11 | 8949    | 1    | 1601.3 | 65.6 | 2  | K.KILDSVGEADDDRLNK.V                                                    |
| *                 | Hs293FLP_TREX_Ti_106.2   | 5.0486 | 0.3724 | 1902.41 | 1902.11 | 5535    | 1    | 1646.1 | 53.1 | 1  | K.KILDSVGEADDDRLNK.V                                                    |
| *                 | Hs293FLP_TREX_Ti_104.1   | 4.7723 | 0.3584 | 1772.74 | 1773.94 | 6348.3  | 1    | 1432.9 | 73.3 | 6  | K.ILDSVGEADDDRLNK.V                                                     |
| *                 | HsFLAG-Control_HeLa_NE   | 3.4757 | 0.1721 | 1259.29 | 1257.43 | 7985.5  | 1    | 1421.5 | 81.8 | 1  | K.NIEDVIAQGIGK.L                                                        |
| gi 11386157 ref N |                          | 4      | 6      | 0.411   | 146     | 16185   | 6.9  | U      |      |    | cytidine deaminase [Homo sapiens]                                       |
| *                 | HsGST-MOCK_Ti_104.178    | 3.6255 | 0.2543 | 2618.9  | 2616.92 | 10064.6 | 1    | 959.7  | 31   | 1  | K.RPACTLKPECVQQLLVCSQEAK.K                                              |
| *                 | HsHeLa_Control-MG_Ti_10  | 3.938  | 0.3859 | 2325.24 | 2325.55 | 4513.4  | 1    | 1144.4 | 60   | 2  | K.SAYCPYSHFPVGAALLTQEGR.I                                               |
| *                 | HsHeLa_Control-MG_Ti_10  | 3.8298 | 0.2113 | 2326.8  | 2325.55 | 7491.1  | 6    | 798.4  | 31.2 | 1  | K.SAYCPYSHFPVGAALLTQEGR.I                                               |
| *                 | HsHeLa_Control-MG_Ti_10  | 4.1741 | 0.4166 | 1999.83 | 1998.1  | 5805.2  | 1    | 848.1  | 59.4 | 2  | K.GCNIENACYPLGICAER.T                                                   |
| gi 38201714 ref N |                          | 11     | 50     | 0.408   | 326     | 36092   | 9.2  | U      |      |    | ELAV-like 1 [Homo sapiens]                                              |
| *                 | HsGST-MOCK_Ti_303.325    | 4.6197 | 0.4296 | 2162.45 | 2163.45 | 4938.9  | 1    | 524.9  | 55.9 | 4  | R.TNLIVNYLPQNMTQDEL.R.S                                                 |
| *                 | HsFLAG-Control_HeLa_NE   | 2.8571 | 0.2381 | 1353.62 | 1354.5  | 6877.2  | 1    | 594.7  | 58.3 | 2  | R.SLFSSIGEVESAK.L                                                       |
| *                 | HsHeLa3_Ti_103.2380.238  | 3.8203 | 0.111  | 1354.67 | 1354.5  | 5191.5  | 1    | 1358.7 | 83.3 | 2  | R.SLFSSIGEVESAK.L                                                       |
| *                 | HsFLAG-Control_HeLa_NE   | 4.1273 | 0.356  | 1355.1  | 1354.5  | 5530.6  | 1    | 1448.4 | 87.5 | 11 | R.SLFSSIGEVESAK.L                                                       |
| *                 | HsHeLa3_Ti_106.2359.235  | 3.3085 | 0.3442 | 1783.86 | 1784.02 | 7597.3  | 2    | 837.6  | 53.1 | 2  | K.VAGHSLGYGFVNYVTAK.D                                                   |
| *                 | HsFLAG-Control_HeLa_NE   | 2.8005 | 0.1551 | 1336.21 | 1336.53 | 5824.5  | 5    | 905.9  | 72.7 | 2  | K.VSYARPSSEVIK.D                                                        |
| *                 | HsFLAG-Control_HeLa_NE   | 4.3168 | 0.2589 | 1220.44 | 1219.38 | 8941.3  | 1    | 2057   | 90   | 8  | K.DANLYISGLPR.T                                                         |
| *                 | HsFLAG-Control_HeLa_NE   | 3.8937 | 0.3256 | 1190.48 | 1189.35 | 6751.5  | 1    | 1289.7 | 85   | 5  | R.VLVDQTTGLSR.G                                                         |
| *                 | HsGST-MOCK_Ti_104.160    | 5.1227 | 0.2868 | 2769.13 | 2770.03 | 4336.6  | 1    | 604.8  | 31   | 2  | K.RSEAEAITSFNGHKPPGSSEPITVK.F                                           |
| *                 | HsFLAG-Control_HeLa_NE   | 4.7549 | 0.322  | 1569.16 | 1569.8  | 8282.6  | 1    | 1550.3 | 73.1 | 10 | K.NVALLSPLYHSPAR.R                                                      |
| *                 | HsFLAG-MOCK_300mM_T      | 3.1125 | 0.177  | 1234.9  | 1234.36 | 5255.9  | 1    | 743.3  | 70   | 2  | R.FGGPVHHQAQR.F                                                         |
| gi 17933772 ref N |                          | 4      | 39     | 0.408   | 103     | 11801   | 6.8  | U      |      |    | S100 calcium binding protein A16 [Homo sapiens]                         |
| *                 | HsFlag1P_Ti_103.3159.315 | 3.0832 | 0.2595 | 1294.61 | 1295.57 | 6419.6  | 1    | 724.1  | 70   | 2  | K.AVIVLVENFYK.Y                                                         |
| *                 | HsHeLa_Control-MG_Ti_20  | 4.3422 | 0.3002 | 1296.29 | 1295.57 | 6899.7  | 1    | 1394.8 | 80   | 12 | K.AVIVLVENFYK.Y                                                         |
| *                 | HsHeLa_Control-MG_Ti_20  | 4.0196 | 0.3002 | 1366.25 | 1366.48 | 8749.4  | 1    | 1914.2 | 86.4 | 7  | K.LIQNLNDANHDGR.I                                                       |
| *                 | HsHeLa_Control-MG_Ti_20  | 6.2635 | 0.3721 | 2083.35 | 2082.4  | 7819.3  | 1    | 1720.2 | 63.9 | 18 | R.ISFDEYWTLIGGITGPIAK.L                                                 |
| gi 4504255 ref NF |                          | 4      | 9      | 0.406   | 128     | 13553   | 10.6 | U      |      |    | H2A histone family, member Z [Homo sapiens]                             |
| *                 | Hs293FLP-MG_Ti_104.190   | 2.3447 | 0.1182 | 944.77  | 945.109 | 4092.1  | 5    | 353.2  | 68.8 | 1  | R.AGLQFPVGR.I                                                           |
| *                 | HsHeLa_Control-MG_Ti_10  | 2.6626 | 0.17   | 945.58  | 945.109 | 3921    | 2    | 699.4  | 81.2 | 1  | R.AGLQFPVGR.I                                                           |
| *                 | HsFLAG-Control_HeLa_NE   | 6.262  | 0.4089 | 2896.59 | 2897.3  | 10111.4 | 1    | 2090.8 | 33.9 | 5  | R.VGATAAVYSAAILEYLTAEVLELAGNASK.D                                       |
| *                 | HsGST-MOCK_Ti_105.150    | 4.106  | 0.3691 | 1371.5  | 1371.63 | 5944    | 1    | 1177.2 | 73.1 | 2  | K.ATIAGGGVIPHIK.S                                                       |
| gi 52632383 ref N |                          | 15     | 42     | 0.404   | 589     | 64133   | 8.2  | U      |      |    | heterogeneous nuclear ribonucleoprotein L isoform a [Homo sapiens]      |
| *                 | HsFLAG-Control_HeLa_NE   | 3.4832 | 0.2697 | 1077.4  | 1077.27 | 4737.5  | 1    | 847.4  | 88.9 | 5  | K.TPASPVVHIR.G                                                          |
| *                 | HsGST-MOCK_Ti_305.060    | 3.9791 | 0.403  | 3088.4  | 3089.61 | 7363    | 1    | 796.4  | 28.6 | 1  | R.GLIDGVVEADLVEALQFPGPISYVVVMPK.K                                       |
| *                 | HsGST-MOCK_Ti_306.057    | 3.8237 | 0.3292 | 3091.03 | 3089.61 | 7557.4  | 1    | 670.7  | 33.9 | 2  | R.GLIDGVVEADLVEALQFPGPISYVVVMPK.K                                       |
| *                 | HsFLAG-Control_HeLa_NE   | 4.5273 | 0.2853 | 3868.89 | 3870.41 | 8281.9  | 1    | 640.4  | 21.2 | 1  | R.SVNSVLLFTILNPIYSITTDVLYTICNPGCPVQR.I                                  |
| *                 | HsFLAG-MOCK_300mM_T      | 3.263  | 0.3709 | 1731.3  | 1730.85 | 5455.1  | 1    | 705.4  | 53.3 | 1  | K.ASLNGADIYSGCCTLK.I                                                    |
| *                 | HsFLAG-Control_HeLa_NE   | 3.9114 | 0.4111 | 2734.86 | 2735.75 | 6787.8  | 1    | 769    | 43.8 | 3  | K.NDQDTWDYTNPNLSGGDPPGSNPNK.R                                           |
| *                 | HsFLAG-MOCK_150mM_T      | 5.1825 | 0.3722 | 1589.66 | 1589.8  | 5629.3  | 1    | 1644.3 | 87.5 | 11 | R.VFNVFLYGNVEK.V                                                        |
| *                 | HsHeLa3_Ti_104.2032.203  | 3.2022 | 0.3524 | 1870.18 | 1869.12 | 7314.6  | 1    | 651    | 50   | 2  | K.SKPGAAMVEMADGYAVDR.A                                                  |
| *                 | HsHeLa3_Ti_106.2255.225  | 3.0603 | 0.3915 | 1636.59 | 1635.88 | 5630    | 1    | 707.6  | 65.4 | 1  | R.AITHLNNNFMGQK.L                                                       |
| *                 | HsFLAG-Control_HeLa_NE   | 4.1363 | 0.337  | 2188.29 | 2189.37 | 5534    | 1    | 807.1  | 52.6 | 2  | K.QPAIMPQSYGLEDGSCSYK.D                                                 |
| *                 | HsHeLa_Control-MG_Ti_20  | 6.4121 | 0.421  | 3775.45 | 3775.18 | 10892.9 | 1    | 1561.7 | 27.4 | 4  | R.IQHPSNVLHFFNAPLEVTENFFEICDELGVK.R                                     |
| *                 | HsHeLa3_Ti_103.1980.198  | 2.3341 | 0.33   | 1222.65 | 1223.33 | 8016.8  | 3    | 545.2  | 55   | 2  | R.SSSGILLEWESK.S                                                        |
| *                 | HsFLAG-Control_HeLa_NE   | 3.0914 | 0.288  | 1224.37 | 1223.33 | 6900.4  | 1    | 904.4  | 70   | 2  | R.SSSGILLEWESK.S                                                        |
| *                 | HsFLAG-MOCK_300mM_T      | 4.3559 | 0.3246 | 3072.51 | 3072.42 | 5977.2  | 1    | 746.6  | 29.8 | 1  | R.SSSGILLEWESKSDALETGLFNHYQMK.N                                         |
| *                 | HsHeLa3_Ti_104.2912.291  | 3.8858 | 0.3268 | 1869.39 | 1868.11 | 5633.8  | 1    | 707.5  | 60   | 4  | K.SDALETGLFNHYQMK.N                                                     |
| gi 14043072 ref N |                          | 9      | 18     | 0.402   | 353     | 37430   | 8.9  | U      |      |    | heterogeneous nuclear ribonucleoprotein A2/B1 isoform B1 [Homo sapiens] |
| gi 4504447 ref NF |                          | 9      | 18     | 0.416   | 341     | 36006   | 8.6  | U      |      |    | heterogeneous nuclear ribonucleoprotein A2/B1 isoform A2 [Homo sapiens] |



|                   |                          |        |        |         |         |         |   |        |      |    |                                                      |
|-------------------|--------------------------|--------|--------|---------|---------|---------|---|--------|------|----|------------------------------------------------------|
|                   | HsHeLa3_Ti_105.3159.315  | 4.553  | 0.3655 | 1800.75 | 1800.02 | 5947.5  | 1 | 1544   | 73.3 | 2  | K.LFIGGLSFETTEESLR.N                                 |
|                   | HsHeLa3_Ti_103.1642.164  | 2.7474 | 0.191  | 1087.61 | 1088.16 | 4587.5  | 2 | 353.3  | 71.4 | 2  | R.NYYEQWGK.L                                         |
|                   | HsHeLa_Control-MG_Ti_20  | 3.3233 | 0.223  | 1339.58 | 1339.49 | 5135.1  | 1 | 854.6  | 79.2 | 1  | R.EESGKPGAHVTVK.K                                    |
|                   | HsHeLa3_Ti_103.2483.248  | 2.7629 | 0.3388 | 1697.8  | 1696.81 | 6087.8  | 1 | 658.5  | 53.6 | 1  | R.GFGFVTFDDHDPVDK.I                                  |
|                   | HsGST-MOCK_Ti_104.117    | 3.0895 | 0.2491 | 1412.34 | 1411.52 | 8280.6  | 1 | 1218.3 | 72.7 | 1  | K.YHTINGHNAEVR.K                                     |
|                   | HsHeLa3_Ti_103.1612.161  | 2.7018 | 0.2095 | 1015.43 | 1014.04 | 4520.8  | 1 | 1088.8 | 77.8 | 1  | R.GGNFGFGDSR.G                                       |
|                   | HsHeLa_Control-MG_Ti_20  | 2.8652 | 0.2294 | 1377.98 | 1378.45 | 7120.5  | 1 | 656.1  | 57.1 | 4  | R.GGGGNFGPGPGSNFR.G                                  |
|                   | HsHeLa3_Ti_103.1934.193  | 5.1977 | 0.4321 | 2495.67 | 2496.53 | 7494.7  | 1 | 959.8  | 40.7 | 2  | R.GFGDGYNGYGGGPGGGNFGGSPGYGGGR.G                     |
|                   | HsHeLa3_Ti_104.1560.156  | 5.3917 | 0.5792 | 2191.57 | 2191.26 | 6203    | 1 | 1267.6 | 56.2 | 4  | R.NMGOPYGGGNYGPGGSGGSGGYGGR.S                        |
| gi 7657532 ref NF |                          | 10     | 26     | 0.4     | 90      | 10180   |   |        |      |    | S100 calcium-binding protein A6 [Homo sapiens]       |
| *                 | HsHeLa_Control-MG_Ti_10  | 2.0948 | 0.0927 | 915.77  | 916.022 | 3257.9  | 7 | 364.7  | 64.3 | 2  | K.LQDAEIAR.L                                         |
| *                 | HsFLAG-Control_HeLa_NE   | 4.157  | 0.2398 | 3188.81 | 3189.59 | 6247.8  | 1 | 666.2  | 25.9 | 1  | R.NKDQEVNFQEYVTFGLGALALIYNEALKG.-                    |
| *                 | HsHeLa_Control-MG_Ti_20  | 4.0177 | 0.4028 | 3189.64 | 3189.59 | 8712.7  | 1 | 778.3  | 37   | 2  | R.NKDQEVNFQEYVTFGLGALALIYNEALKG.-                    |
| *                 | HsFLAG-Control_Hela_Ti_1 | 5.0855 | 0.3347 | 2890.28 | 2890.26 | 9206.3  | 1 | 1377.9 | 45.8 | 1  | K.DQEVNFQEYVTFGLGALALIYNEALK.G                       |
| *                 | HsHeLa_Control-MG_Ti_20  | 5.3663 | 0.4812 | 2945.85 | 2947.31 | 8724.6  | 1 | 1127.8 | 42   | 6  | K.DQEVNFQEYVTFGLGALALIYNEALKG.-                      |
| *                 | HsFLAG-Control_HeLa_S1   | 4.4149 | 0.3394 | 2946.32 | 2947.31 | 7422.5  | 1 | 992.4  | 44   | 5  | K.DQEVNFQEYVTFGLGALALIYNEALKG.-                      |
| *                 | HsFLAG-Control_Hela_Ti_1 | 4.0052 | 0.3411 | 2947.06 | 2947.31 | 6771.5  | 1 | 780.1  | 40   | 5  | K.DQEVNFQEYVTFGLGALALIYNEALKG.-                      |
| *                 | HsFLAG-Control_Hela_Ti_1 | 3.5091 | 0.1953 | 2948.46 | 2947.31 | 6824.5  | 5 | 447.4  | 24   | 1  | K.DQEVNFQEYVTFGLGALALIYNEALKG.-                      |
| *                 | HsFLAG-Control_HeLa_S1   | 4.4613 | 0.2475 | 2948.8  | 2947.31 | 9823.6  | 2 | 917.3  | 29   | 2  | K.DQEVNFQEYVTFGLGALALIYNEALKG.-                      |
| *                 | HsHeLa_Control-MG_Ti_20  | 4.1594 | 0.3854 | 2948.82 | 2947.31 | 6116.8  | 3 | 416.3  | 24   | 1  | K.DQEVNFQEYVTFGLGALALIYNEALKG.-                      |
| gi 40254869 ref N |                          | 21     | 100    | 0.397   | 499     | 55442   |   |        |      |    | pre-mRNA processing factor 31 homolog [Homo sapiens] |
| *                 | HsFlag1P_Ti_106.3130.313 | 4.837  | 0.2662 | 2390.6  | 2391.73 | 10149.5 | 1 | 736.9  | 42.5 | 6  | R.VIVDANNLTVEIENELNIIHK.F                            |
| *                 | Hs293FLP-MG_Ti_206.341   | 3.5674 | 0.2577 | 2390.65 | 2391.73 | 9502.5  | 2 | 621.8  | 40   | 2  | R.VIVDANNLTVEIENELNIIHK.F                            |
| *                 | HsHeLa_Control-MG_Ti_20  | 3.8113 | 0.1109 | 2391.73 | 2391.73 | 2695.8  | 2 | 491.6  | 37.5 | 1  | R.VIVDANNLTVEIENELNIIHK.F                            |
| *                 | Hs293FLP_Ti_304.3534.35  | 4.5854 | 0.4048 | 2035.11 | 2033.34 | 5554.1  | 1 | 808.6  | 62.5 | 17 | K.RFPELESVLPNALDYIR.T                                |
| *                 | Hs293FLP-MG_Ti_203.437   | 3.6057 | 0.3179 | 1878.01 | 1877.15 | 4757.8  | 1 | 596.4  | 63.3 | 1  | R.FPELESVLPNALDYIR.T                                 |
| *                 | HsHeLa3_Ti_105.3704.370  | 4.2583 | 0.3256 | 1905.81 | 1906.29 | 3216.3  | 1 | 839.8  | 61.1 | 6  | R.MSFIAPNLSIIIGASTAAK.I                              |
| *                 | HsFlag1P_Ti_106.2501.250 | 2.7714 | 0.2981 | 1260.52 | 1261.52 | 5000.2  | 1 | 347.6  | 54.2 | 4  | K.IMGVAGGLTNLSK.M                                    |
| *                 | HsF-IP-293-MG_Ti_103.187 | 3.8308 | 0.3479 | 1260.71 | 1261.52 | 4891.2  | 1 | 1327.1 | 87.5 | 2  | K.IMGVAGGLTNLSK.M                                    |
| *                 | HsF-IP-293-MG_Ti_104.208 | 4.0638 | 0.2999 | 1476.45 | 1475.77 | 7362.5  | 1 | 964.6  | 66.7 | 2  | K.MPACNIMLLGAQR.K                                    |
| *                 | HsHeLa_Control-MG_Ti_20  | 4.8656 | 0.3537 | 3516.8  | 3517.96 | 7984.3  | 1 | 927.9  | 26.6 | 1  | R.KTLSGFSSTSVPHTGYIYHSDIVQSLPPDLR.R                  |
| *                 | Hs293FLP-MG_Ti_206.310   | 6.0708 | 0.4877 | 3388.91 | 3389.79 | 7537.6  | 1 | 1423.4 | 31.7 | 9  | K.TLSGFSSTSVPHTGYIYHSDIVQSLPPDLR.R                   |
| *                 | HsHeLa_Control-MG_Ti_10  | 2.2422 | 0.1934 | 1235.49 | 1236.28 | 5945.1  | 1 | 460.2  | 55   | 1  | R.VDSFHESTEKG.V                                      |
| *                 | HsHeLa_Control-MG_Ti_10  | 3.7165 | 0.3967 | 1236.78 | 1236.28 | 6635.7  | 1 | 1165.7 | 85   | 5  | R.VDSFHESTEKG.V                                      |
| *                 | Hs293FLP-MG_Ti_203.179   | 3.2931 | 0.2223 | 1351.69 | 1351.5  | 7035.9  | 1 | 966.6  | 75   | 7  | K.VGYELKDEIER.K                                      |
| *                 | HsFlag1P_Ti_106.3038.303 | 3.6883 | 0.3446 | 2672.63 | 2673.91 | 10537.8 | 1 | 1208.8 | 45.7 | 1  | R.MSFGEIEEDAYQEDLGFSLGHLGK.S                         |
| *                 | Hs293FLP-MG_Ti_202.369   | 4.7723 | 0.342  | 2602.66 | 2603.89 | 9164.8  | 1 | 1177.9 | 32   | 1  | R.SSGTASSVAFTPLQGLEIVNPQAAEK.K                       |
| *                 | Hs293FLP-MG_Ti_202.368   | 4.0686 | 0.3967 | 2602.71 | 2603.89 | 5873.1  | 1 | 568.1  | 40   | 3  | R.SSGTASSVAFTPLQGLEIVNPQAAEK.K                       |
| *                 | HsHeLa_Control-MG_Ti_20  | 5.4629 | 0.3499 | 2604.23 | 2603.89 | 6335.6  | 1 | 726    | 42   | 27 | R.SSGTASSVAFTPLQGLEIVNPQAAEK.K                       |
| *                 | HsF-IP-293-MG_Ti_102.288 | 4.3067 | 0.3113 | 2604.84 | 2603.89 | 9656.6  | 1 | 894.7  | 27   | 1  | R.SSGTASSVAFTPLQGLEIVNPQAAEK.K                       |
| *                 | HsFlag1P_Ti_106.2820.282 | 3.9399 | 0.3129 | 2730.7  | 2732.06 | 5958.3  | 1 | 648.2  | 27.9 | 2  | R.SSGTASSVAFTPLQGLEIVNPQAAEK.V                       |
| *                 | HsFlag1P_Ti_103.3027.303 | 2.4395 | 0.0968 | 1222.44 | 1223.43 | 9422.8  | 2 | 569.9  | 61.1 | 1  | K.YFSSMAEFLK.V                                       |
| gi 23065552 ref N |                          | 12     | 34     | 0.396   | 225     | 26560   |   |        |      |    | glutathione S-transferase M3 [Homo sapiens]          |
| *                 | HsGST-MOCK_Ti_302.259    | 2.8339 | 0.2629 | 1587.45 | 1588.75 | 6604.8  | 1 | 577.6  | 58.3 | 2  | R.LLLEFTDTSYEEK.R                                    |
| *                 | HsGST-MOCK_Ti_302.259    | 4.996  | 0.3194 | 1587.88 | 1588.75 | 7966.9  | 1 | 2126.7 | 87.5 | 4  | R.LLLEFTDTSYEEK.R                                    |
| *                 | HsGST-MOCK_Ti_306.353    | 5.1627 | 0.3343 | 2008.09 | 2009.35 | 7000.3  | 1 | 1749.7 | 71.9 | 5  | K.FKLDLDFPNLPYLLDGK.N                                |
| *                 | HsGST-MOCK_Ti_305.440    | 4.1504 | 0.2147 | 2008.52 | 2009.35 | 6210.4  | 1 | 1447.8 | 48.4 | 2  | K.FKLDLDFPNLPYLLDGK.N                                |
| *                 | HsGST-MOCK_Ti_305.313    | 3.7789 | 0.3255 | 1747.97 | 1749.04 | 3285.2  | 1 | 772.8  | 76.9 | 3  | K.IRVDIENQVMDFR.T                                    |
| *                 | HsGST-MOCK_Ti_302.263    | 3.9817 | 0.2208 | 1479.72 | 1479.69 | 8275.8  | 1 | 2074.2 | 81.8 | 1  | R.VDIENQVMDFR.T                                      |

|                   |                           |        |        |         |         |         |      |        |      |    |                                                                         |
|-------------------|---------------------------|--------|--------|---------|---------|---------|------|--------|------|----|-------------------------------------------------------------------------|
| *                 | HsGST-MOCK_Ti_303.241     | 2.34   | 0.1086 | 971.33  | 972.088 | 5780.8  | 4    | 602.4  | 78.6 | 2  | K.FSWFAGEK.L                                                            |
| *                 | HsGST-MOCK_Ti_302.492     | 4.4458 | 0.3609 | 1972.62 | 1974.22 | 7996.5  | 1    | 1758.8 | 51.7 | 1  | K.LTFVDFLTYDILDQNR.I                                                    |
| *                 | HsGST-MOCK_Ti_303.506     | 5.2859 | 0.3785 | 1973.45 | 1974.22 | 11972.2 | 1    | 2992.3 | 76.7 | 8  | K.LTFVDFLTYDILDQNR.I                                                    |
| *                 | HsGST-MOCK_Ti_303.221     | 1.9342 | 0.1427 | 1135.43 | 1136.26 | 2727.6  | 9    | 235.4  | 75   | 1  | K.CLDEFNLK.A                                                            |
| *                 | HsGST-MOCK_Ti_303.205     | 4.4065 | 0.333  | 1443.97 | 1444.59 | 7713.7  | 1    | 1754.4 | 81.8 | 3  | K.IAAYLQSDQFCK.M                                                        |
| *                 | HsGST-MOCK_Ti_303.203     | 3.3042 | 0.298  | 1443.99 | 1444.59 | 5782.4  | 1    | 633.8  | 68.2 | 2  | K.IAAYLQSDQFCK.M                                                        |
| gi 4758638 ref Nf |                           | 10     | 59     | 0.393   | 224     | 25035   | 6.4  | U      |      |    | peroxiredoxin 6 [Homo sapiens]                                          |
| *                 | Hs293FLP_Ti_306.3302.33   | 5.8201 | 0.4931 | 2032.03 | 2032.27 | 6707.5  | 1    | 1944.8 | 75   | 1  | R.FHDFLGDSWGILFSHPR.D                                                   |
| *                 | HsHeLa_Control-MG_Ti_20   | 6.6002 | 0.5203 | 2032.05 | 2032.27 | 8665.1  | 1    | 2976   | 81.2 | 5  | R.FHDFLGDSWGILFSHPR.D                                                   |
| *                 | HsHeLa_Control-MG_Ti_20   | 4.3749 | 0.2671 | 2032.1  | 2032.27 | 6063.5  | 1    | 1044.1 | 43.8 | 1  | R.FHDFLGDSWGILFSHPR.D                                                   |
| *                 | HsHeLa_Control-MG_Ti_20   | 3.278  | 0.2092 | 1396.6  | 1396.51 | 6491.9  | 2    | 652.5  | 68.2 | 6  | R.DFTPVCTTELGR.A                                                        |
| *                 | HsHeLa_Control-MG_Ti_20   | 4.659  | 0.4499 | 1899.74 | 1898.17 | 7341.9  | 1    | 1645.9 | 71.9 | 6  | K.LIALSIDSVEDHLAWSK.D                                                   |
| *                 | HsFLAG-Control_HeLa_NE    | 3.6344 | 0.3086 | 1583.3  | 1583.62 | 7486.2  | 1    | 922.4  | 66.7 | 7  | K.DINAYNCEEPTEK.L                                                       |
| *                 | HsHeLa_Control-MG_Ti_10   | 3.1344 | 0.1706 | 2650.18 | 2650.87 | 5651.7  | 4    | 334.5  | 35.7 | 1  | K.DINAYNCEEPTEKLPFPIIDDR.N                                              |
| *                 | HsFLAG-Control_293_Ti_20  | 3.3854 | 0.2231 | 1085.86 | 1086.28 | 4655.2  | 1    | 1018.9 | 93.8 | 22 | K.LPFPIIDDR.N                                                           |
| *                 | HsFLAG-Control_Hela_Ti_1  | 2.6125 | 0.2628 | 1008.56 | 1008.21 | 6069.5  | 3    | 696.8  | 75   | 8  | R.VVVFVGPDK.K                                                           |
| *                 | HsFLAG-Control_MG_293     | 2.7943 | 0.1423 | 1193.03 | 1192.4  | 4202.6  | 1    | 463.7  | 70   | 2  | K.LSILYPATTGR.N                                                         |
| gi 30795231 ref N |                           | 6      | 10     | 0.392   | 227     | 22693   | 4.6  | U      |      |    | brain abundant, membrane attached signal protein 1 [Homo sapiens]       |
| *                 | HsHeLa3_Ti_102.1065.106   | 3.1136 | 0.2415 | 1428.65 | 1428.5  | 6575.6  | 1    | 1095.1 | 69.2 | 2  | K.ESEFQAAAEPAAEK.E                                                      |
| *                 | HsHeLa3_Ti_103.1230.123   | 4.3073 | 0.3355 | 1776.69 | 1776.9  | 3679.2  | 2    | 567.1  | 58.3 | 2  | K.APEQEQAAPGAAGGEAPK.A                                                  |
| *                 | HsHeLa3_Ti_103.1395.139   | 3.1435 | 0.1884 | 2636.65 | 2637.77 | 4690.3  | 1    | 310.9  | 33.3 | 1  | K.AAEAAAAPAESAAPAAGEEPSKEEGEPK.K                                        |
| *                 | HsHeLa3_Ti_104.0951.095   | 4.3061 | 0.297  | 1413.66 | 1413.57 | 4110.8  | 1    | 974.6  | 80.8 | 2  | K.KTEAPAAPAAQETK.S                                                      |
| *                 | HsHeLa3_Ti_102.1161.116   | 1.9824 | 0.3301 | 1386.83 | 1387.49 | 3334.3  | 2    | 200.6  | 50   | 1  | K.ETPAATEAPSSTPK.A                                                      |
| *                 | HsHeLa3_Ti_102.1133.113   | 3.0187 | 0.2926 | 1387.63 | 1387.49 | 4414.8  | 5    | 499.4  | 61.5 | 2  | K.ETPAATEAPSSTPK.A                                                      |
| gi 30410792 ref N |                           | 6      | 43     | 0.389   | 239     | 27402   | 5.7  | U      |      |    | proteasome activator subunit 2 [Homo sapiens]                           |
| *                 | HsFLAG-Control_HeLa_NE    | 4.6085 | 0.2171 | 1688.55 | 1687.85 | 6900.8  | 1    | 1434.3 | 83.3 | 6  | R.QNLFQEAEEFLYR.F                                                       |
| *                 | HsFLAG-Control_HeLa_S10   | 6.7549 | 0.3018 | 2532.63 | 2532.9  | 9795.3  | 1    | 2914   | 66.7 | 19 | K.IYLNQLLQEDSLNVADLTSLR.A                                               |
| *                 | HsFLAG-Control_HeLa_S10   | 4.1824 | 0.2375 | 1809.95 | 1810.27 | 8165.1  | 1    | 843.7  | 53.3 | 4  | K.VLSLLALVKPEVWTLK.E                                                    |
| *                 | HsFLAG-Control_HeLa_S10   | 4.2115 | 0.2798 | 1535.44 | 1535.65 | 8645.6  | 1    | 1612.6 | 76.9 | 2  | K.IEDGNDFGVAIQEK.V                                                      |
| *                 | HsFLAG-Control_HeLa_S10   | 3.98   | 0.3578 | 1354.42 | 1353.56 | 5463.1  | 1    | 1087   | 77.3 | 4  | K.TKVEAFQTTISK.Y                                                        |
| *                 | HsFLAG-Control_HeLa_S10   | 5.1172 | 0.4601 | 1900.52 | 1899.15 | 6348.9  | 1    | 1609.3 | 73.3 | 8  | R.AFYAELYHISSNLEK.I                                                     |
| gi 11415030 ref N |                           | 5      | 14     | 0.388   | 103     | 11367   | 11.4 | U      |      |    | H4 histone family, member E [Homo sapiens]                              |
| gi 89066445 ref X |                           | 5      | 14     | 0.388   | 103     | 11367   | 11.4 | U      |      |    | PREDICTED: similar to germinal histone H4 gene isoform 4 [Homo sapiens] |
| gi 89066443 ref X |                           | 5      | 14     | 0.388   | 103     | 11367   | 11.4 | U      |      |    | PREDICTED: similar to germinal histone H4 gene isoform 3 [Homo sapiens] |
| gi 89066441 ref X |                           | 5      | 14     | 0.388   | 103     | 11367   | 11.4 | U      |      |    | PREDICTED: similar to germinal histone H4 gene isoform 2 [Homo sapiens] |
| gi 89066439 ref X |                           | 5      | 14     | 0.388   | 103     | 11367   | 11.4 | U      |      |    | PREDICTED: similar to germinal histone H4 gene isoform 1 [Homo sapiens] |
| gi 4504323 ref Nf |                           | 5      | 14     | 0.388   | 103     | 11367   | 11.4 | U      |      |    | histone 2, H4 [Homo sapiens]                                            |
| gi 4504321 ref Nf |                           | 5      | 14     | 0.388   | 103     | 11367   | 11.4 | U      |      |    | H4 histone family, member M [Homo sapiens]                              |
| gi 4504317 ref Nf |                           | 5      | 14     | 0.388   | 103     | 11367   | 11.4 | U      |      |    | H4 histone family, member K [Homo sapiens]                              |
| gi 4504315 ref Nf |                           | 5      | 14     | 0.388   | 103     | 11367   | 11.4 | U      |      |    | H4 histone family, member J [Homo sapiens]                              |
| gi 4504313 ref Nf |                           | 5      | 14     | 0.388   | 103     | 11367   | 11.4 | U      |      |    | H4 histone family, member I [Homo sapiens]                              |
| gi 4504311 ref Nf |                           | 5      | 14     | 0.388   | 103     | 11367   | 11.4 | U      |      |    | H4 histone family, member H [Homo sapiens]                              |
| gi 4504309 ref Nf |                           | 5      | 14     | 0.388   | 103     | 11367   | 11.4 | U      |      |    | H4 histone family, member G [Homo sapiens]                              |
| gi 4504307 ref Nf |                           | 5      | 14     | 0.388   | 103     | 11367   | 11.4 | U      |      |    | H4 histone family, member D [Homo sapiens]                              |
| gi 4504305 ref Nf |                           | 5      | 14     | 0.388   | 103     | 11367   | 11.4 | U      |      |    | H4 histone family, member C [Homo sapiens]                              |
| gi 4504303 ref Nf |                           | 5      | 14     | 0.388   | 103     | 11367   | 11.4 | U      |      |    | H4 histone family, member B [Homo sapiens]                              |
| gi 4504301 ref Nf |                           | 5      | 14     | 0.388   | 103     | 11367   | 11.4 | U      |      |    | H4 histone family, member A [Homo sapiens]                              |
| gi 28173560 ref N |                           | 5      | 14     | 0.388   | 103     | 11367   | 11.4 | U      |      |    | histone H4 [Homo sapiens]                                               |
|                   | HsF-IP-293_Ti_204.1623.16 | 3.2717 | 0.1446 | 1325.85 | 1326.54 | 6521.7  | 4    | 896.4  | 72.7 | 6  | R.DNIQGITKPAIR.R                                                        |

|                    |                          |        |        |         |         |         |   |        |      |    |                                                                      |
|--------------------|--------------------------|--------|--------|---------|---------|---------|---|--------|------|----|----------------------------------------------------------------------|
|                    | Hs293FLP_TREX_Ti_104.1   | 3.5105 | 0.2807 | 1338.43 | 1337.52 | 5787.5  | 1 | 897.9  | 80   | 1  | K.RISGLIYEETR.G                                                      |
|                    | Hs293FLP-MG_Ti_102.201   | 3.8695 | 0.171  | 1181.77 | 1181.33 | 4482.4  | 4 | 961.8  | 88.9 | 3  | R.ISGLIYEETR.G                                                       |
|                    | Hs293FLP-MG_Ti_102.114   | 3.1154 | 0.2712 | 1134.03 | 1135.22 | 3841.8  | 1 | 703.3  | 83.3 | 3  | R.DAVTYTEHAK.R                                                       |
|                    | HsGST-MOCK_Ti_402.232    | 1.8862 | 0.1231 | 714.31  | 714.796 | 3574.9  | 7 | 264.9  | 66.7 | 1  | R.TLYGFGG.-                                                          |
| gi 4502969 ref NF  | 6                        | 14     | 0.387  | 271     | 30037   | 5.5 U   |   |        |      |    | catechol-O-methyltransferase isoform MB-COMT [Homo sapiens]          |
| gi 6466450 ref NF  | 6                        | 14     | 0.475  | 221     | 24449   | 5.3 U   |   |        |      |    | catechol-O-methyltransferase isoform S-COMT [Homo sapiens]           |
|                    | HsHeLa_Control-MG_Ti_20  | 6.2596 | 0.429  | 3178.7  | 3179.48 | 10975.8 | 1 | 2298   | 36.1 | 2  | R.ILNHVLQHAEPGNAQSVLEAIDTYCEQK.E                                     |
|                    | Hs293FLP-MG_Ti_202.305   | 4.036  | 0.384  | 1828.09 | 1829.07 | 6225.6  | 1 | 802.7  | 60   | 2  | R.LITIEINPDCAAITQR.M                                                 |
|                    | HsFLAG-Control_HeLa_S10  | 4.3422 | 0.3282 | 1681.99 | 1682.01 | 4932.4  | 1 | 855.6  | 63.3 | 4  | K.VTLVVGASQDIIPQLK.K                                                 |
|                    | Hs293FLP-MG_Ti_202.401   | 4.0895 | 0.3638 | 1804.9  | 1806.08 | 7538    | 1 | 1688.4 | 78.6 | 3  | R.YLPDTLLLEECGLLR.K                                                  |
|                    | Hs293FLP-MG_Ti_204.330   | 4.2665 | 0.2214 | 2335.47 | 2336.66 | 8618.4  | 1 | 1317.9 | 36.9 | 2  | K.GTVLLADNVICPGAPDFLAHVR.G                                           |
|                    | HsHeLa-FLAG-IP_S100_Ti   | 1.8273 | 0.1729 | 888.22  | 888.993 | 2751.5  | 7 | 188    | 64.3 | 1  | R.EVVDGLEK.A                                                         |
| gi 53829365 ref NF | 7                        | 23     | 0.384  | 263     | 28527   | 5.3 U   |   |        |      |    | potassium channel tetramerisation domain containing 2 [Homo sapiens] |
|                    | HsFLAG-Control_MG_293_   | 4.6879 | 0.3807 | 1754.52 | 1754.98 | 4931.4  | 1 | 843.4  | 61.8 | 6  | R.PAAAVAQPLEPGPPPER.A                                                |
|                    | HsFLAG-Control_MG_293_   | 3.7058 | 0.224  | 1754.95 | 1754.98 | 5872.9  | 2 | 1114.3 | 42.6 | 1  | R.PAAAVAQPLEPGPPPER.A                                                |
|                    | HsFLAG-Control_293_Ti_20 | 3.7157 | 0.2647 | 1328.38 | 1328.51 | 6697.8  | 1 | 949.1  | 72.7 | 2  | R.LNVGGTYFVTTR.Q                                                     |
|                    | HsFLAG-Control_293_Ti_20 | 3.4701 | 0.3739 | 1569.49 | 1569.8  | 6856.6  | 1 | 1172.7 | 75   | 1  | R.DPTYFGPILNYLR.H                                                    |
|                    | HsFLAG-Control_293_Ti_20 | 5.6566 | 0.3954 | 2385.36 | 2382.63 | 10826   | 1 | 1909.5 | 55   | 9  | K.ELAEEGVLEEAFFYNIASLVR.L                                            |
|                    | HsFLAG-Control_293_Ti_20 | 5.2966 | 0.4718 | 2499.55 | 2500.76 | 8109.8  | 1 | 1506.2 | 57.5 | 3  | R.VLQCQEELTQMVSTMSDGWK.F                                             |
| *                  | HsFLAG-Control_293_Ti_20 | 2.5914 | 0.2248 | 1744.57 | 1744.9  | 11877.6 | 2 | 674.9  | 46.7 | 1  | R.ELNNSTNGIVIEPSEK.A                                                 |
| gi 18375623 ref NF | 20                       | 74     | 0.383  | 428     | 48991   | 5.7 U   |   |        |      |    | HLA-B associated transcript 1 [Homo sapiens]                         |
| gi 4758112 ref NF  | 20                       | 74     | 0.383  | 428     | 48991   | 5.7 U   |   |        |      |    | HLA-B associated transcript 1 [Homo sapiens]                         |
|                    | HsFLAG-Control_HeLa_NE   | 2.9102 | 0.2152 | 1296.6  | 1297.41 | 4190.9  | 1 | 218.6  | 54.5 | 2  | K.GSYVSIHSSGFR.D                                                     |
|                    | HsFLAG-Control_HeLa_NE   | 3.3999 | 0.3467 | 1297.35 | 1297.41 | 6239.4  | 1 | 1014.2 | 72.7 | 2  | K.GSYVSIHSSGFR.D                                                     |
|                    | HsFLAG-Control_HeLa_NE   | 3.1536 | 0.356  | 1297.62 | 1297.41 | 5696.1  | 1 | 730.8  | 68.2 | 3  | K.GSYVSIHSSGFR.D                                                     |
|                    | HsFLAG-MOCK_300mM_T      | 5.1172 | 0.3001 | 3653.38 | 3654.03 | 4854.3  | 1 | 730.6  | 28.2 | 2  | R.AIVDCGFEHPSEVQHECIPQAILGMDVLCQAK.S                                 |
|                    | HsFLAG-Control_HeLa_NE   | 2.6266 | 0.1728 | 1137.6  | 1138.4  | 7730.1  | 2 | 726    | 70   | 2  | K.VAVFFGGLSIK.K                                                      |
|                    | HsFLAG-Control_HeLa_NE   | 3.3902 | 0.3183 | 1138.55 | 1138.4  | 5384.7  | 1 | 977.9  | 85   | 1  | K.VAVFFGGLSIK.K                                                      |
|                    | HsFLAG-MOCK_300mM_T      | 3.4773 | 0.2859 | 1436.68 | 1435.64 | 5678.4  | 1 | 1005   | 75   | 2  | K.KNCPHIVGTPGR.I                                                     |
|                    | HsFLAG-MOCK_300mM_T      | 3.4991 | 0.3177 | 1308.04 | 1307.46 | 5987.5  | 1 | 1276.7 | 81.8 | 2  | K.KNCPHIVGTPGR.I                                                     |
|                    | HsFLAG-MOCK_300mM_T      | 2.8673 | 0.2384 | 1176.53 | 1177.27 | 4683    | 1 | 715.7  | 75   | 2  | K.HFILDECDK.M                                                        |
|                    | HsFLAG-MOCK_300mM_T      | 2.9461 | 0.1885 | 1177.45 | 1177.27 | 3721.6  | 6 | 751.1  | 81.2 | 1  | K.HFILDECDK.M                                                        |
|                    | HsFLAG-Control_HeLa_NE   | 3.4418 | 0.3925 | 1463.16 | 1463.72 | 5746.5  | 1 | 821.1  | 72.7 | 4  | K.LTLHGLQQYYVK.L                                                     |
|                    | HsFLAG-Control_HeLa_NE   | 3.6145 | 0.3768 | 1464    | 1463.72 | 6104.4  | 1 | 861.3  | 72.7 | 2  | K.LTLHGLQQYYVK.L                                                     |
|                    | HsFLAG-Control_HeLa_S10  | 2.7595 | 0.1186 | 2277.94 | 2278.67 | 9889.4  | 1 | 685.4  | 42.1 | 1  | R.CIALAQLLVEQNFPFAIAHR.G                                             |
|                    | HsFLAG-MOCK_300mM_T      | 4.3223 | 0.3571 | 2279.93 | 2278.67 | 3959.7  | 1 | 967.1  | 44.7 | 1  | R.CIALAQLLVEQNFPFAIAHR.G                                             |
|                    | HsFLAG-Control_HeLa_NE   | 5.0318 | 0.336  | 2280.39 | 2278.67 | 5361.7  | 1 | 1206.4 | 43.4 | 2  | R.CIALAQLLVEQNFPFAIAHR.G                                             |
|                    | HsFLAG-Control_HeLa_NE   | 3.7388 | 0.3438 | 1260.68 | 1260.53 | 7837.1  | 1 | 1712.5 | 90   | 1  | R.RILVATNLFGR.G                                                      |
|                    | HsFLAG-Control_HeLa_S10  | 3.8361 | 0.2249 | 1104.14 | 1104.34 | 5719.5  | 1 | 1117.8 | 83.3 | 14 | R.ILVATNLFGR.G                                                       |
|                    | HsFLAG-Control_HeLa_NE   | 4.782  | 0.4338 | 1480.11 | 1480.62 | 6927.2  | 1 | 1731.5 | 80.8 | 16 | K.GLAITFVSDENDAK.I                                                   |
|                    | HsFLAG-Control_HeLa_NE   | 4.2776 | 0.2765 | 3551.8  | 3552.87 | 10571.7 | 1 | 645.6  | 22.4 | 5  | K.ILNDVQDRFEVNISELPEIDISSYIEQTR.-                                    |
|                    | HsFLAG-Control_HeLa_NE   | 4.6289 | 0.3115 | 2596.92 | 2598.82 | 4850.5  | 1 | 746.4  | 52.4 | 9  | R.FEVNISELPDEIDISSYIEQTR.-                                           |
| gi 4507555 ref NF  | 19                       | 69     | 0.379  | 694     | 75492   | 7.7 U   |   |        |      |    | thymopoietin isoform alpha [Homo sapiens]                            |
|                    | Hs283FLP_Ti_102.1671.16  | 4.8223 | 0.4195 | 1699.67 | 1698.87 | 4311.7  | 1 | 785.6  | 70   | 4  | K.SELVANNVTLPAGEQR.K                                                 |
|                    | HsFLAG-Control_HeLa_NE   | 4.0695 | 0.272  | 1826.55 | 1827.05 | 5640.8  | 2 | 506.9  | 50   | 2  | K.SELVANNVTLPAGEQRK.D                                                |
|                    | HsFLAG-Control_HeLa_NE   | 3.2736 | 0.338  | 1720.37 | 1719.98 | 8982.6  | 1 | 793.9  | 57.7 | 1  | K.DVYVQLYLQHLTAR.N                                                   |
|                    | HsFLAG-Control_HeLa_NE   | 3.6445 | 0.3427 | 1252.35 | 1252.42 | 6377.2  | 1 | 1343.9 | 77.3 | 13 | R.NRPPLPAGTNSK.G                                                     |
|                    | HsFLAG-Control_HeLa_NE   | 4.3441 | 0.3386 | 2571.7  | 2571.72 | 6972.6  | 1 | 1615.3 | 37   | 2  | K.GPPDFSSDEEREPTVLGSGAAAAGR.S                                        |
|                    | HsFLAG-Control_HeLa_NE   | 4.949  | 0.2151 | 2689.91 | 2689.89 | 9766.4  | 1 | 905.9  | 38.6 | 4  | R.QEDKDDLDVTELTNEDLLDQLVK.Y                                          |

|                   |                           |        |        |         |         |        |        |                                                                                                         |      |                                            |
|-------------------|---------------------------|--------|--------|---------|---------|--------|--------|---------------------------------------------------------------------------------------------------------|------|--------------------------------------------|
|                   | HsF-IP-293_Ti_203.3434.34 | 3.5692 | 0.1968 | 2190.44 | 2189.38 | 6699.7 | 1      | 659.9                                                                                                   | 47.2 | 1 K.DDLVTELTNEDLLDQLVK.Y                   |
|                   | HsFLAG-Control_HeLa_NE    | 3.2365 | 0.2587 | 1331.53 | 1331.51 | 4823.4 | 1      | 929.4                                                                                                   | 70.8 | 5 K.YGVNPGPIVGTR.K                         |
|                   | HsFLAG-Control_HeLa_NE    | 3.1144 | 0.2369 | 1650.66 | 1648.77 | 5132.5 | 1      | 918.7                                                                                                   | 73.3 | 5 R.SSTPLPTISSAENTR.Q                      |
| *                 | HsFLAG-Control_HeLa_NE    | 2.9906 | 0.2659 | 1705.48 | 1705.96 | 5283.9 | 1      | 641.5                                                                                                   | 60   | 1 K.GDLPREPLVATNLPGR.G                     |
| *                 | HsFLAG-Control_HeLa_NE    | 3.2559 | 0.2952 | 1285.58 | 1286.38 | 7274.7 | 1      | 765.7                                                                                                   | 63.6 | 1 R.SHISDQSPLSSK.R                         |
| *                 | HsFLAG-Control_HeLa_NE    | 3.529  | 0.2761 | 1286.39 | 1286.38 | 5930.4 | 1      | 1044.2                                                                                                  | 77.3 | 2 R.SHISDQSPLSSK.R                         |
| *                 | HsFLAG-Control_HeLa_NE    | 4.0345 | 0.3    | 1286.53 | 1286.38 | 5353.3 | 1      | 1152.8                                                                                                  | 81.8 | 4 R.SHISDQSPLSSK.R                         |
| *                 | HsFLAG-Control_HeLa_NE    | 3.9276 | 0.3073 | 2140.49 | 2140.4  | 4508.4 | 2      | 459.2                                                                                                   | 47.4 | 8 K.ALEEESESSLISPLAQAIR.D                  |
| *                 | HsFLAG-Control_HeLa_NE    | 4.1363 | 0.2945 | 1433.02 | 1431.55 | 10147  | 1      | 1980.3                                                                                                  | 85   | 2 K.VIEEEWQQVDR.Q                          |
|                   | HsFLAG-Control_HeLa_NE    | 4.4482 | 0.3332 | 3895.34 | 3894.21 | 7603.1 | 1      | 688.3                                                                                                   | 22.9 | 1 K.VDDEILGFISEATPLGGIQAASTESCQNQLDLALCR.A |
| *                 | HsFLAG-Control_HeLa_NE    | 5.7224 | 0.3664 | 2035.09 | 2035.31 | 9000.2 | 1      | 2352.9                                                                                                  | 68.4 | 7 R.AYEAASALQIATHAFVAK.A                   |
| *                 | HsFLAG-Control_HeLa_NE    | 3.1321 | 0.2947 | 1067.58 | 1068.26 | 6136.8 | 1      | 918.5                                                                                                   | 77.8 | 4 R.THQALGILSK.T                           |
| *                 | HsFLAG-Control_HeLa_NE    | 4.5537 | 0.4999 | 1954    | 1954.06 | 7665.9 | 1      | 1113.1                                                                                                  | 59.4 | 2 K.TYDAASYICEAAFDEVK.M                    |
| gi 4506773 ref NF |                           | 3      | 10     | 0.377   | 114     | 13242  | 6.1 U  | S100 calcium-binding protein A9 [Homo sapiens]                                                          |      |                                            |
| *                 | HsFLAG-Control_HeLa_Ti_1  | 4.1882 | 0.3665 | 1807.61 | 1808.04 | 7655.4 | 1      | 823.2                                                                                                   | 60.7 | 8 R.NIETIINTFHQYSVK.L                      |
| *                 | HsFLAG-Control_293_Ti_20  | 2.9402 | 0.1742 | 1456.21 | 1456.6  | 4445   | 1      | 490.4                                                                                                   | 66.7 | 1 K.LGHPDTLNQGEFK.E                        |
| *                 | HsFLAG-Control_MG_293     | 3.4238 | 0.1828 | 1745.47 | 1743.93 | 8157.7 | 1      | 924.3                                                                                                   | 57.1 | 1 K.VIEHIMEDLDTNADK.Q                      |
| gi 10835063 ref N |                           | 5      | 22     | 0.374   | 294     | 32575  | 4.8 U  | nucleophosmin 1 isoform 1 [Homo sapiens]                                                                |      |                                            |
| gi 40353734 ref N |                           | 5      | 22     | 0.415   | 265     | 29465  | 4.6 U  | nucleophosmin 1 isoform 2 [Homo sapiens]                                                                |      |                                            |
|                   | Hs293FLP_TREX_Ti_102.1    | 3.4085 | 0.2927 | 1569.34 | 1569.63 | 7824.4 | 1      | 716.8                                                                                                   | 62.5 | 2 K.VDNDENEHQLSLR.T                        |
|                   | HsGST-MOCK_Ti_102.259     | 5.905  | 0.5076 | 2930.39 | 2931.29 | 11478  | 1      | 1757.1                                                                                                  | 29.6 | 2 R.TVSLGAGAKDELHIVEAEAMNYEGSPIK.V         |
|                   | HsGST-MOCK_Ti_305.385     | 4.675  | 0.4054 | 2227.52 | 2228.66 | 7439.5 | 1      | 1475                                                                                                    | 60   | 11 K.MSVQPTVSLGGFEITPPVVLRL.L              |
|                   | HsFLAG-MOCK_300mM_T       | 6.1708 | 0.5274 | 3952.6  | 3952.6  | 8486.1 | 1      | 1313.2                                                                                                  | 28   | 1 K.VKLAAEDDDDDDEEDDDDDDDDFDDEEAEEK.A      |
|                   | HsGST-MOCK_Ti_302.369     | 4.1804 | 0.3153 | 1820.34 | 1821.02 | 6548.5 | 1      | 1826.2                                                                                                  | 73.1 | 6 R.MTDQEAIQDLWQWR.K                       |
| gi 4827040 ref NF |                           | 120    | 448    | 0.371   | 955     | 108694 | 10.2 U | thyroid hormone receptor associated protein 3 [Homo sapiens]<br>K.KSSSKDSRPSQAAGDNQGGDEVKEQTFSGGTSQDTK. |      |                                            |
| *                 | Hs293FLP-MG_Ti_205.143    | 3.7609 | 0.1168 | 3659.29 | 3659.77 | 8130.5 | 1      | 652.3                                                                                                   | 22.1 | 1 A                                        |
| *                 | HsF-IP-293-MG_Ti_102.07   | 2.9695 | 0.2666 | 1773.88 | 1774.8  | 6813.9 | 1      | 651.4                                                                                                   | 56.2 | 1 K.DSRPSQAAGDNQGGDEVK.E                   |
| *                 | Hs293FLP-MG_Ti_103.137    | 4.9164 | 0.2795 | 3142.56 | 3142.19 | 7606.1 | 3      | 767.1                                                                                                   | 26.7 | 3 K.DSRPSQAAGDNQGGDEVKEQTFSGGTSQDTK.A      |
| *                 | HsFLAG-Control_HeLa_NE    | 3.0702 | 0.3885 | 1386.27 | 1386.42 | 6300   | 1      | 855                                                                                                     | 70.8 | 7 K.EQTFSGGTSQDTK.A                        |
| *                 | HsFlag1P_Ti_103.1977.197  | 4.6199 | 0.3877 | 2055.29 | 2056.15 | 3379.4 | 1      | 715.7                                                                                                   | 63.2 | 5 K.ASESSKPWPDPATYGTGSASR.A                |
| *                 | HsHeLa_Control-MG_Ti_20   | 4.97   | 0.2366 | 2055.73 | 2056.15 | 4045.4 | 1      | 847.3                                                                                                   | 60.5 | 14 K.ASESSKPWPDPATYGTGSASR.A               |
| *                 | HsFLAG-Control_HeLa_NE    | 4.2094 | 0.4155 | 2057.39 | 2056.15 | 7243.9 | 1      | 1136.4                                                                                                  | 38.2 | 2 K.ASESSKPWPDPATYGTGSASR.A                |
| *                 | HsHeLa_Control-MG_Ti_20   | 1.946  | 0.2152 | 1016.44 | 1017.13 | 2203.9 | 1      | 134.3                                                                                                   | 66.7 | 1 R.ASAVSELSPR.E                           |
| *                 | Hs283FLP_Ti_102.1379.13   | 3.7861 | 0.2807 | 1017.5  | 1017.13 | 4929.5 | 2      | 1073.5                                                                                                  | 83.3 | 9 R.ASAVSELSPR.E                           |
| *                 | HsHeLa_Control-MG_Ti_10   | 3.4624 | 0.2811 | 1018.63 | 1017.13 | 4818.6 | 1      | 1129                                                                                                    | 88.9 | 1 R.ASAVSELSPR.E                           |
| *                 | Hs293FLP_TREX_Ti_103.1    | 2.3934 | 0.2462 | 984.5   | 985.172 | 3988.1 | 3      | 176.6                                                                                                   | 62.5 | 2 K.SPLQSVVVR.R                            |
| *                 | HsFlag1P_Ti_106.2356.235  | 2.5306 | 0.275  | 984.56  | 985.172 | 3364.2 | 1      | 207.7                                                                                                   | 68.8 | 2 K.SPLQSVVVR.R                            |
| *                 | HsHeLa_Control-MG_Ti_20   | 1.9429 | 0.2428 | 984.57  | 985.172 | 2231.4 | 1      | 122                                                                                                     | 68.8 | 1 K.SPLQSVVVR.R                            |
| *                 | HsFLAG-Control_HeLa_NE    | 2.4094 | 0.225  | 984.6   | 985.172 | 3987.9 | 2      | 233                                                                                                     | 68.8 | 3 K.SPLQSVVVR.R                            |
| *                 | Hs283FLP_Ti_103.1474.14   | 2.3896 | 0.2298 | 984.61  | 985.172 | 3211.9 | 1      | 198.7                                                                                                   | 68.8 | 1 K.SPLQSVVVR.R                            |
| *                 | HsFlag1P_Ti_106.2358.235  | 3.1465 | 0.2033 | 984.64  | 985.172 | 5792.3 | 2      | 1055.5                                                                                                  | 87.5 | 1 K.SPLQSVVVR.R                            |
| *                 | HsF-IP-293-MG_Ti_103.15   | 2.5373 | 0.2418 | 984.66  | 985.172 | 3726.6 | 1      | 210.1                                                                                                   | 68.8 | 2 K.SPLQSVVVR.R                            |
| *                 | Hs293FLP_Ti_303.1538.15   | 2.1818 | 0.2618 | 984.67  | 985.172 | 4103.4 | 1      | 206.1                                                                                                   | 68.8 | 1 K.SPLQSVVVR.R                            |
| *                 | Hs293FLP-MG_Ti_103.167    | 2.1788 | 0.2826 | 984.74  | 985.172 | 3013.2 | 1      | 229.2                                                                                                   | 75   | 2 K.SPLQSVVVR.R                            |
| *                 | HsFLAG-Control_HeLa_NE    | 3.2559 | 0.1604 | 985.38  | 985.172 | 5474.1 | 1      | 1091                                                                                                    | 93.8 | 3 K.SPLQSVVVR.R                            |
| *                 | Hs293FLP_TREX_Ti_103.1    | 3.3204 | 0.1629 | 985.47  | 985.172 | 5503   | 1      | 1164                                                                                                    | 93.8 | 1 K.SPLQSVVVR.R                            |

|   |                           |        |        |         |         |        |   |        |      |    |                                  |
|---|---------------------------|--------|--------|---------|---------|--------|---|--------|------|----|----------------------------------|
| * | HsF-IP-293_Ti_103.1526.14 | 3.0542 | 0.1222 | 985.47  | 985.172 | 5491.4 | 2 | 1078.7 | 93.8 | 2  | K.SPLQSVVVR.R                    |
| * | Hs293FLP-MG_Ti_203.177    | 3.1764 | 0.1803 | 985.49  | 985.172 | 6746.6 | 1 | 1302.3 | 93.8 | 4  | K.SPLQSVVVR.R                    |
| * | Hs283FLP_Ti_103.1479.14   | 3.1023 | 0.2232 | 985.61  | 985.172 | 5503.3 | 2 | 962.8  | 87.5 | 2  | K.SPLQSVVVR.R                    |
| * | Hs293FLP_Ti_303.1539.15   | 3.2348 | 0.1981 | 985.7   | 985.172 | 4988.3 | 1 | 913.2  | 87.5 | 1  | K.SPLQSVVVR.R                    |
| * | HsF-IP-293-MG_Ti_103.15   | 3.1306 | 0.1428 | 986.41  | 985.172 | 5725.4 | 1 | 1152.1 | 93.8 | 2  | K.SPLQSVVVR.R                    |
| * | HsF-IP-293-MG_Ti_103.13   | 5.1043 | 0.2947 | 2606.63 | 2607.7  | 4160.7 | 1 | 678.9  | 34.6 | 2  | K.SPPSTGSTYGSSQKEESAASGGAAYTK.R  |
| * | Hs293FLP-MG_Ti_203.146    | 4.4203 | 0.3726 | 2606.65 | 2607.7  | 8642.3 | 1 | 1058.3 | 42.3 | 2  | K.SPPSTGSTYGSSQKEESAASGGAAYTK.R  |
| * | Hs283FLP_Ti_103.1248.12   | 4.7703 | 0.4509 | 2606.91 | 2607.7  | 9659.8 | 1 | 1185.6 | 40.4 | 2  | K.SPPSTGSTYGSSQKEESAASGGAAYTK.R  |
| * | Hs293FLP_Ti_303.1269.12   | 4.5834 | 0.4868 | 2607.07 | 2607.7  | 8514.6 | 1 | 1158.2 | 44.2 | 2  | K.SPPSTGSTYGSSQKEESAASGGAAYTK.R  |
| * | HsFLAG-Control_HeLa_NE    | 4.8012 | 0.4453 | 2607.19 | 2607.7  | 5365.2 | 2 | 477.9  | 27.9 | 2  | K.SPPSTGSTYGSSQKEESAASGGAAYTK.R  |
| * | HsHeLa_Control-MG_Ti_20   | 3.9977 | 0.3955 | 2607.3  | 2607.7  | 5098.8 | 1 | 748.7  | 30.8 | 2  | K.SPPSTGSTYGSSQKEESAASGGAAYTK.R  |
| * | HsF-IP-293-MG_Ti_103.13   | 4.5348 | 0.388  | 2607.47 | 2607.7  | 7718.5 | 1 | 1192.5 | 46.2 | 1  | K.SPPSTGSTYGSSQKEESAASGGAAYTK.R  |
| * | Hs293FLP-MG_Ti_103.134    | 4.412  | 0.4574 | 2607.6  | 2607.7  | 7393.9 | 1 | 986.2  | 42.3 | 2  | K.SPPSTGSTYGSSQKEESAASGGAAYTK.R  |
| * | Hs283FLP_Ti_103.1250.12   | 3.8978 | 0.3742 | 2607.78 | 2607.7  | 3622.2 | 5 | 282.7  | 25   | 1  | K.SPPSTGSTYGSSQKEESAASGGAAYTK.R  |
| * | HsHeLa_Control-MG_Ti_20   | 5.5219 | 0.4757 | 2607.92 | 2607.7  | 9583.9 | 1 | 1415.3 | 46.2 | 4  | K.SPPSTGSTYGSSQKEESAASGGAAYTK.R  |
| * | Hs293FLP-MG_Ti_103.135    | 3.7523 | 0.2478 | 2608.07 | 2607.7  | 3556.6 | 1 | 328.3  | 25   | 2  | K.SPPSTGSTYGSSQKEESAASGGAAYTK.R  |
| * | Hs293FLP_Ti_303.1270.12   | 4.1387 | 0.2962 | 2608.44 | 2607.7  | 3612   | 4 | 289.1  | 25   | 1  | K.SPPSTGSTYGSSQKEESAASGGAAYTK.R  |
| * | Hs293FLP-MG_Ti_205.144    | 4.1703 | 0.2905 | 2763.11 | 2763.89 | 5640   | 1 | 546    | 25.9 | 3  | K.SPPSTGSTYGSSQKEESAASGGAAYTKR.Y |
| * | HsHeLa_Control-MG_Ti_10   | 3.8506 | 0.2921 | 1495.81 | 1495.63 | 7214.7 | 1 | 1428.6 | 81.8 | 5  | K.RYLEEQKTENGD                   |
| * | HsF-IP-293_Ti_102.1258.1  | 2.393  | 0.3398 | 1140.33 | 1141.18 | 5646.6 | 5 | 401.8  | 54.5 | 2  | K.GSFSDTGLGDGK.M                 |
| * | HsF-IP-293-MG_Ti_102.14   | 2.3555 | 0.2746 | 1140.35 | 1141.18 | 5017.4 | 1 | 511.6  | 63.6 | 2  | K.GSFSDTGLGDGK.M                 |
| * | Hs293FLP-MG_Ti_202.179    | 2.4046 | 0.2176 | 1140.4  | 1141.18 | 6674.1 | 1 | 679.5  | 68.2 | 2  | K.GSFSDTGLGDGK.M                 |
| * | HsFLAG-Control_HeLa_NE    | 2.4659 | 0.3559 | 1140.4  | 1141.18 | 6925.8 | 1 | 519.2  | 59.1 | 1  | K.GSFSDTGLGDGK.M                 |
| * | Hs283FLP_Ti_102.1405.14   | 1.8518 | 0.1935 | 1140.4  | 1141.18 | 5592.3 | 4 | 304.5  | 50   | 1  | K.GSFSDTGLGDGK.M                 |
| * | Hs293FLP-MG_Ti_102.158    | 2.4192 | 0.3102 | 1140.46 | 1141.18 | 5799.9 | 1 | 594.3  | 59.1 | 2  | K.GSFSDTGLGDGK.M                 |
| * | HsHeLa_Control-MG_Ti_20   | 2.5461 | 0.3045 | 1140.46 | 1141.18 | 4608.2 | 1 | 638    | 68.2 | 2  | K.GSFSDTGLGDGK.M                 |
| * | HsHeLa_Control-MG_Ti_10   | 2.1526 | 0.3859 | 1140.6  | 1141.18 | 4611.9 | 1 | 436.3  | 59.1 | 2  | K.GSFSDTGLGDGK.M                 |
| * | HsHeLa_Control_Ti_102.14  | 2.401  | 0.4198 | 1140.68 | 1141.18 | 5359.9 | 1 | 500.8  | 59.1 | 2  | K.GSFSDTGLGDGK.M                 |
| * | HsF-IP-293_Ti_102.1254.1  | 3.384  | 0.3968 | 1141.23 | 1141.18 | 6825.5 | 1 | 1625.6 | 81.8 | 2  | K.GSFSDTGLGDGK.M                 |
| * | HsHeLa_Control-MG_Ti_20   | 3.2799 | 0.3722 | 1141.26 | 1141.18 | 7319.4 | 1 | 1661.8 | 81.8 | 1  | K.GSFSDTGLGDGK.M                 |
| * | Hs293FLP-MG_Ti_202.180    | 3.4632 | 0.377  | 1141.28 | 1141.18 | 7331.7 | 1 | 1430.3 | 77.3 | 2  | K.GSFSDTGLGDGK.M                 |
| * | Hs283FLP_Ti_102.1406.14   | 3.3013 | 0.3908 | 1141.34 | 1141.18 | 6868.3 | 1 | 1471   | 77.3 | 1  | K.GSFSDTGLGDGK.M                 |
| * | HsFLAG-Control_HeLa_NE    | 3.4528 | 0.2892 | 1141.35 | 1141.18 | 7711   | 1 | 1791.8 | 81.8 | 4  | K.GSFSDTGLGDGK.M                 |
| * | HsF-IP-293-MG_Ti_102.14   | 3.5747 | 0.4187 | 1141.38 | 1141.18 | 7372.9 | 1 | 1690.8 | 81.8 | 2  | K.GSFSDTGLGDGK.M                 |
| * | HsFLAG-Control_HeLa_NE    | 3.4815 | 0.3596 | 1141.51 | 1141.18 | 7188.9 | 1 | 1508.3 | 77.3 | 2  | K.GSFSDTGLGDGK.M                 |
| * | HsHeLa_Control-MG_Ti_10   | 3.3025 | 0.3392 | 1141.62 | 1141.18 | 7365.5 | 1 | 1771.5 | 81.8 | 2  | K.GSFSDTGLGDGK.M                 |
| * | Hs293FLP-MG_Ti_102.159    | 3.2562 | 0.3371 | 1141.7  | 1141.18 | 5636.1 | 1 | 1339.4 | 77.3 | 1  | K.GSFSDTGLGDGK.M                 |
| * | Hs293FLP-MG_Ti_205.169    | 4.0054 | 0.2693 | 1930.73 | 1931.13 | 6809.9 | 1 | 638.6  | 53.3 | 1  | K.GRKESEFDDEPKFMSK.V             |
| * | HsHeLa_Control-MG_Ti_20   | 3.3029 | 0.1991 | 1223.54 | 1224.27 | 5939.6 | 1 | 870.5  | 83.3 | 2  | R.KESEFDDEPK.F                   |
| * | Hs293FLP-MG_Ti_205.195    | 2.4881 | 0.3918 | 1488.57 | 1489.71 | 4080.7 | 1 | 360.4  | 53.8 | 2  | K.SGKWEGLVYAPPGK.E               |
| * | HsHeLa_Control-MG_Ti_10   | 2.8142 | 0.3144 | 1488.76 | 1489.71 | 2987.3 | 5 | 226.7  | 50   | 2  | K.SGKWEGLVYAPPGK.E               |
| * | Hs293FLP_Ti_304.1830.18   | 2.2295 | 0.2839 | 1488.8  | 1489.71 | 3346.8 | 1 | 245.6  | 50   | 1  | K.SGKWEGLVYAPPGK.E               |
| * | HsFLAG-Control_HeLa_NE    | 4.2603 | 0.3251 | 1489.1  | 1489.71 | 6806.1 | 1 | 1293.9 | 73.1 | 3  | K.SGKWEGLVYAPPGK.E               |
| * | HsHeLa_Control-MG_Ti_20   | 4.3519 | 0.3911 | 1489.31 | 1489.71 | 4937.3 | 1 | 1382.2 | 80.8 | 12 | K.SGKWEGLVYAPPGK.E               |
| * | Hs293FLP-MG_Ti_205.195    | 4.2534 | 0.3865 | 1489.51 | 1489.71 | 6979.1 | 1 | 1526.6 | 76.9 | 3  | K.SGKWEGLVYAPPGK.E               |
| * | Hs293FLP_Ti_304.1817.18   | 4.1541 | 0.4478 | 1489.9  | 1489.71 | 5156.8 | 1 | 1257.2 | 76.9 | 8  | K.SGKWEGLVYAPPGK.E               |
| * | Hs293FLP-MG_Ti_206.268    | 4.402  | 0.3444 | 1746.66 | 1747    | 7099.2 | 1 | 1426.4 | 66.7 | 2  | K.SGKWEGLVYAPPGKEK.Q             |
| * | HsHeLa_Control-MG_Ti_10   | 3.5939 | 0.1956 | 1747.55 | 1747    | 3860.8 | 3 | 529.5  | 41.7 | 1  | K.SGKWEGLVYAPPGKEK.Q             |
| * | HsHeLa_Control-MG_Ti_10   | 3.9319 | 0.3213 | 1748.92 | 1747    | 6968.1 | 1 | 971.2  | 60   | 2  | K.SGKWEGLVYAPPGKEK.Q             |

|   |                           |        |        |         |         |         |   |        |      |    |                            |
|---|---------------------------|--------|--------|---------|---------|---------|---|--------|------|----|----------------------------|
| * | Hs293FLP-MG_Ti_202.241    | 4.0325 | 0.3477 | 1217.42 | 1217.41 | 6535.7  | 1 | 1778.1 | 95   | 13 | K.WEGLVYAPPGK.E            |
| * | HsHeLa_Control-MG_Ti_20   | 4.0589 | 0.3418 | 1217.49 | 1217.41 | 7101.1  | 1 | 1577   | 85   | 9  | K.WEGLVYAPPGK.E            |
| * | Hs283FLP_Ti_103.1823.18   | 2.0666 | 0.1293 | 1217.61 | 1217.41 | 5574.2  | 1 | 501.7  | 60   | 1  | K.WEGLVYAPPGK.E            |
| * | HsHeLa_Control-MG_Ti_10   | 3.4182 | 0.3386 | 1475.86 | 1474.7  | 5230.3  | 3 | 929.2  | 75   | 2  | K.WEGLVYAPPGKEK.Q          |
| * | Hs293FLP-MG_Ti_203.168    | 4.7046 | 0.3563 | 1623.52 | 1623.71 | 7328.3  | 1 | 1757.2 | 83.3 | 20 | R.KTEEEEEESFPER.S          |
| * | HsFLAG-Control_HeLa_NE    | 4.6299 | 0.3112 | 1495.34 | 1495.54 | 10530.9 | 1 | 1936.8 | 77.3 | 58 | K.TEEEEESFPER.S            |
| * | HsF-IP-293_Ti_106.1937.19 | 2.6606 | 0.102  | 999.29  | 999.158 | 3868    | 4 | 519.3  | 85.7 | 1  | K.NFRVTAYK.A               |
| * | Hs293FLP-MG_Ti_204.144    | 2.0305 | 0.2452 | 1090.56 | 1091.25 | 6051.4  | 7 | 450.9  | 60   | 1  | K.LGAKGDFPTGK.S            |
| * | Hs293FLP-MG_Ti_204.145    | 3.1458 | 0.3011 | 1091.22 | 1091.25 | 5951.8  | 1 | 1040.6 | 85   | 2  | K.LGAKGDFPTGK.S            |
| * | HsHeLa_Control_Ti_102.17  | 2.8932 | 0.3313 | 1201.47 | 1199.28 | 5515.1  | 1 | 1384.6 | 94.4 | 1  | R.MDSFDEDLAR.P             |
| * | HsF-IP-293-MG_Ti_106.229  | 2.7979 | 0.1897 | 2150.67 | 2151.36 | 3733.1  | 2 | 251.1  | 44.4 | 1  | R.MDSFDEDLARPSGLLAQER.K    |
| * | HsF-IP-293-MG_Ti_106.229  | 4.0949 | 0.3171 | 2151.56 | 2151.36 | 5477    | 1 | 1087.4 | 41.7 | 6  | R.MDSFDEDLARPSGLLAQER.K    |
| * | HsF-IP-293-MG_Ti_103.137  | 3.4607 | 0.1258 | 972.37  | 971.101 | 5690.3  | 1 | 1309.4 | 93.8 | 3  | R.PSGLLAQER.K              |
| * | HsFlag1P_Ti_106.2220.222  | 4.0761 | 0.3326 | 1629.99 | 1630.8  | 7756.5  | 1 | 1114.5 | 70.8 | 1  | R.DLVHSNKKEQEFR.S          |
| * | HsFLAG-Control_HeLa_NE    | 3.5187 | 0.331  | 1529.63 | 1530.68 | 6130.7  | 1 | 395.3  | 54.2 | 2  | R.SIFQHIQSAQSQR.S          |
| * | HsFLAG-Control_HeLa_NE    | 3.3859 | 0.313  | 1529.66 | 1530.68 | 6290.4  | 1 | 535.7  | 62.5 | 2  | R.SIFQHIQSAQSQR.S          |
| * | HsHeLa_Control-MG_Ti_10   | 3.3067 | 0.2927 | 1529.79 | 1530.68 | 5053.1  | 1 | 418.6  | 62.5 | 2  | R.SIFQHIQSAQSQR.S          |
| * | Hs283FLP_Ti_106.2008.20   | 3.289  | 0.4105 | 1529.8  | 1530.68 | 5115.2  | 1 | 397.4  | 58.3 | 2  | R.SIFQHIQSAQSQR.S          |
| * | HsHeLa_Control_Ti_106.27  | 3.2527 | 0.2828 | 1529.91 | 1530.68 | 5331.4  | 1 | 395.9  | 58.3 | 2  | R.SIFQHIQSAQSQR.S          |
| * | Hs293FLP_TREX_Ti_106.2    | 4.3389 | 0.39   | 1529.97 | 1530.68 | 7088.8  | 1 | 1499.1 | 79.2 | 5  | R.SIFQHIQSAQSQR.S          |
| * | Hs293FLP_Ti_306.2395.23   | 3.2702 | 0.3318 | 1530.03 | 1530.68 | 4760.5  | 1 | 363.1  | 58.3 | 4  | R.SIFQHIQSAQSQR.S          |
| * | HsF-IP-293_Ti_106.2026.20 | 4.2995 | 0.3884 | 1530.38 | 1530.68 | 7268.7  | 1 | 1281   | 75   | 11 | R.SIFQHIQSAQSQR.S          |
| * | Hs293FLP-MG_Ti_206.262    | 3.8863 | 0.2627 | 1530.54 | 1530.68 | 9279.7  | 1 | 1781.6 | 79.2 | 2  | R.SIFQHIQSAQSQR.S          |
| * | HsF-IP-293-MG_Ti_106.207  | 3.4929 | 0.2971 | 1530.58 | 1530.68 | 5005.7  | 1 | 363.9  | 58.3 | 2  | R.SIFQHIQSAQSQR.S          |
| * | Hs293FLP-MG_Ti_206.263    | 3.469  | 0.3495 | 1530.62 | 1530.68 | 5569.5  | 1 | 293.9  | 50   | 3  | R.SIFQHIQSAQSQR.S          |
| * | HsF-IP-293-MG_Ti_106.207  | 4.1803 | 0.2958 | 1530.64 | 1530.68 | 7144    | 1 | 1594.4 | 83.3 | 3  | R.SIFQHIQSAQSQR.S          |
| * | HsFLAG-Control_HeLa_NE    | 3.8996 | 0.22   | 1530.67 | 1530.68 | 7639.2  | 1 | 1176.8 | 70.8 | 3  | R.SIFQHIQSAQSQR.S          |
| * | HsHeLa_Control_Ti_106.27  | 3.8887 | 0.3332 | 1530.85 | 1530.68 | 6685.3  | 1 | 1333.8 | 79.2 | 2  | R.SIFQHIQSAQSQR.S          |
| * | Hs293FLP-MG_Ti_206.262    | 3.835  | 0.284  | 1531.07 | 1530.68 | 2934.2  | 1 | 805.2  | 62.5 | 1  | R.SIFQHIQSAQSQR.S          |
| * | HsFLAG-Control_HeLa_NE    | 3.8648 | 0.3106 | 1531.09 | 1530.68 | 8072.2  | 1 | 1373.1 | 75   | 3  | R.SIFQHIQSAQSQR.S          |
| * | Hs293FLP_Ti_306.2394.23   | 3.7315 | 0.3348 | 1531.61 | 1530.68 | 6987.5  | 1 | 1077.2 | 70.8 | 2  | R.SIFQHIQSAQSQR.S          |
| * | HsHeLa_Control-MG_Ti_10   | 3.4903 | 0.419  | 1625.99 | 1625.76 | 6884.7  | 1 | 990.1  | 73.1 | 5  | K.EHHFGSSGMTLHER.F         |
| * | Hs293FLP-MG_Ti_205.184    | 3.5693 | 0.197  | 1192.25 | 1192.36 | 6197.5  | 1 | 959.9  | 83.3 | 6  | R.RIDISPSTFR.K             |
| * | Hs293FLP_Ti_305.0975.09   | 2.5917 | 0.2493 | 1037.28 | 1038.17 | 5884.2  | 1 | 952.7  | 81.2 | 1  | K.HGLAHDEM.K.S             |
| * | HsF-IP-293-MG_Ti_105.079  | 1.8778 | 0.2606 | 1037.36 | 1038.17 | 3435.5  | 3 | 283.2  | 62.5 | 1  | K.HGLAHDEM.K.S             |
| * | HsHeLa_Control-MG_Ti_20   | 2.0917 | 0.2729 | 1037.36 | 1038.17 | 3158    | 7 | 183.9  | 56.2 | 1  | K.HGLAHDEM.K.S             |
| * | HsHeLa_Control-MG_Ti_10   | 2.0047 | 0.1973 | 1037.43 | 1038.17 | 4067    | 1 | 322.5  | 56.2 | 1  | K.HGLAHDEM.K.S             |
| * | Hs293FLP-MG_Ti_205.128    | 3.0616 | 0.2865 | 1037.97 | 1038.17 | 7908    | 1 | 1151.9 | 81.2 | 2  | K.HGLAHDEM.K.S             |
| * | HsHeLa_Control-MG_Ti_10   | 3.3271 | 0.323  | 1039.43 | 1038.17 | 7061.7  | 1 | 1318   | 87.5 | 1  | K.HGLAHDEM.K.S             |
| * | Hs293FLP-MG_Ti_203.159    | 3.327  | 0.2023 | 1121.39 | 1121.24 | 5083.1  | 1 | 1056.4 | 87.5 | 19 | K.YKDDPVDLR.L              |
| * | Hs293FLP-MG_Ti_104.148    | 5.1026 | 0.362  | 2381.08 | 2381.38 | 7869.3  | 1 | 989    | 52.6 | 22 | K.AEEYTEETEEREESTTGFDK.S   |
| * | HsHeLa_Control-MG_Ti_20   | 2.7496 | 0.2304 | 1849.51 | 1849.95 | 4433    | 8 | 338.5  | 53.8 | 1  | K.RNREEEWDPEYTPK.S         |
| * | Hs293FLP-MG_Ti_203.174    | 3.387  | 0.2196 | 1693.66 | 1693.77 | 4095.3  | 1 | 662.5  | 75   | 2  | R.NREEEWDPEYTPK.S          |
| * | HsF-IP-293_Ti_102.1526.19 | 3.5091 | 0.2765 | 1422.83 | 1423.48 | 4814.6  | 1 | 767.9  | 80   | 7  | R.EEEWDPEYTPK.S            |
| * | HsHeLa_Control-MG_Ti_20   | 2.9838 | 0.1236 | 1111.36 | 1110.21 | 4792.9  | 1 | 1016.1 | 92.9 | 2  | K.KYYLHDDR.E               |
| * | HsHeLa_Control-MG_Ti_10   | 3.931  | 0.2925 | 1812.77 | 1812.89 | 6539    | 1 | 877.9  | 67.9 | 5  | K.KYYLHDDREGEESDK.W        |
| * | Hs293FLP_Ti_303.1193.11   | 4.3255 | 0.422  | 1684.77 | 1684.72 | 9564.7  | 1 | 1560.3 | 73.1 | 14 | K.YYLHDDREGEESDK.W         |
| * | HsHeLa_Control_Ti_102.14  | 5.4707 | 0.4387 | 2000.65 | 2000.94 | 5744.7  | 1 | 1243.2 | 67.6 | 6  | K.FSGEEGEIEDDESGETENR.E    |
| * | HsHeLa_Control_Ti_102.14  | 4.5626 | 0.4085 | 2386.93 | 2387.34 | 6536.5  | 1 | 628.6  | 45   | 4  | K.FSGEEGEIEDDESGETENREEK.D |

|                   |                          |        |        |         |         |         |      |        |      |    |                                                                     |
|-------------------|--------------------------|--------|--------|---------|---------|---------|------|--------|------|----|---------------------------------------------------------------------|
| *                 | HsFLAG-Control_HeLa_NE   | 4.5681 | 0.303  | 3285.07 | 3286.27 | 6109.8  | 1    | 584.8  | 26.8 | 1  | K.FSGEEGIEEDDESGTENREEKDNIQPTE.-                                    |
| gi 4503571 ref NF |                          | 14     | 44     | 0.371   | 434     | 47169   | 7.4  | U      |      |    | enolase 1 [Homo sapiens]                                            |
| *                 | HsFLAG-Control_MG_293_   | 2.634  | 0.1939 | 1406.61 | 1407.56 | 8800.8  | 1    | 689    | 54.2 | 2  | R.GNPTVEVDLFTSK.G                                                   |
| *                 | Hs293FLP_TREX_Ti_105.2   | 3.3026 | 0.2212 | 1407.3  | 1407.56 | 4235.1  | 2    | 568.8  | 66.7 | 2  | R.GNPTVEVDLFTSK.G                                                   |
| *                 | HsHeLa3_Ti_103.2746.274  | 4.6445 | 0.3922 | 1807.02 | 1806.03 | 3246.1  | 1    | 666.5  | 70.6 | 4  | R.AAVPSGASTGIYEALELR.D                                              |
| *                 | HsFLAG-Control_Hela_Ti_1 | 1.9043 | 0.1313 | 899.5   | 900.106 | 6729.3  | 5    | 587.8  | 68.8 | 1  | K.TIAPALVSK.K                                                       |
| *                 | Hs293FLP_TREX_Ti_104.1   | 4.0197 | 0.2032 | 1445.11 | 1445.66 | 7653.7  | 1    | 1036.7 | 77.3 | 2  | K.KLNVTEQEIKD.K                                                     |
| *                 | HsHeLa3_Ti_105.3739.373  | 4.1285 | 0.1425 | 1911.19 | 1909.32 | 5761.3  | 5    | 1231.9 | 46.9 | 1  | K.LAMQEFMILPVGAANFR.E                                               |
| *                 | HsHeLa3_Ti_105.3734.373  | 3.9726 | 0.2495 | 1912.01 | 1909.32 | 5364.6  | 1    | 676.9  | 59.4 | 1  | K.LAMQEFMILPVGAANFR.E                                               |
| *                 | HsFLAG-Control_293_Ti_2( | 3.677  | 0.1949 | 1144.28 | 1144.32 | 7822.9  | 1    | 1284.6 | 83.3 | 7  | R.IGAEVYHNLK.N                                                      |
| *                 | HsFLAG-Control_293_Ti_2( | 4.8602 | 0.4265 | 1963.37 | 1962.08 | 7963.5  | 1    | 1833.8 | 66.7 | 7  | K.DATNVGDEGGFAPNILENK.E                                             |
| *                 | HsHeLa3_Ti_102.2637.263  | 2.107  | 0.2947 | 1426.53 | 1426.61 | 10923.1 | 4    | 636    | 50   | 1  | R.YISPDQLADLYK.S                                                    |
| *                 | HsHeLa3_Ti_102.2606.260  | 2.8566 | 0.2164 | 1426.7  | 1426.61 | 3227.1  | 1    | 550.9  | 72.7 | 1  | R.YISPDQLADLYK.S                                                    |
| *                 | HsHeLa3_Ti_102.3841.384  | 5.5501 | 0.3811 | 2511.01 | 2511.66 | 5992.6  | 1    | 1752.4 | 67.5 | 10 | K.DYPVVSIEDPFDQDDWGAWQK.F                                           |
| *                 | HsHeLa3_Ti_105.4294.429  | 4.94   | 0.5174 | 2356.24 | 2354.58 | 6378.9  | 1    | 1105.2 | 52.4 | 4  | R.SGETEDTFIADLVVGLCTGQIK.T                                          |
| *                 | Hs293FLP_TREX_Ti_102.1   | 1.9797 | 0.1482 | 904.37  | 904.993 | 5724.7  | 2    | 503.1  | 71.4 | 1  | R.IEEELGSK.A                                                        |
| gi 4885379 ref NF |                          | 31     | 68     | 0.37    | 219     | 21865   | 11   | U      |      |    | H1 histone family, member 4 [Homo sapiens]                          |
| *                 | Hs293FLP_TREX_Ti_106.2   | 4.2447 | 0.2855 | 1483.62 | 1483.75 | 6765.2  | 1    | 1180.6 | 76.9 | 2  | K.RKASGPPVSELITK.A                                                  |
| *                 | Hs293FLP_TREX_Ti_105.1   | 3.0697 | 0.3063 | 1326.44 | 1327.56 | 5625.4  | 1    | 525.1  | 54.2 | 2  | R.KASGPPVSELITK.A                                                   |
| *                 | HsFLAG-MOCK_300mM_T      | 4.3832 | 0.346  | 1327.6  | 1327.56 | 7311.6  | 1    | 1540.1 | 79.2 | 4  | R.KASGPPVSELITK.A                                                   |
| *                 | Hs293FLP_TREX_Ti_105.1   | 4.5528 | 0.2867 | 1327.6  | 1327.56 | 6535    | 1    | 1711.1 | 83.3 | 3  | R.KASGPPVSELITK.A                                                   |
| *                 | Hs293FLP_TREX_Ti_105.1   | 4.1842 | 0.2215 | 1327.89 | 1327.56 | 4082.6  | 1    | 1092.6 | 58.3 | 2  | R.KASGPPVSELITK.A                                                   |
| *                 | Hs293FLP-MG_Ti_302.158   | 2.2832 | 0.2134 | 1198.39 | 1199.39 | 5448.6  | 5    | 377.6  | 59.1 | 1  | K.ASGPPVSELITK.A                                                    |
| *                 | HsHeLa3_Ti_103.1780.178  | 2.1262 | 0.1215 | 1198.67 | 1199.39 | 7333.6  | 3    | 598.9  | 59.1 | 1  | K.ASGPPVSELITK.A                                                    |
| *                 | HsFLAG-MOCK_300mM_T      | 3.2152 | 0.232  | 1198.92 | 1199.39 | 6681.5  | 1    | 820.6  | 72.7 | 7  | K.ASGPPVSELITK.A                                                    |
| *                 | HsGST-MOCK_Ti_303.200    | 2.7091 | 0.2074 | 1199.13 | 1199.39 | 6241.3  | 1    | 738.8  | 72.7 | 1  | K.ASGPPVSELITK.A                                                    |
| *                 | Hs293FLP_TREX_Ti_106.2   | 4.5743 | 0.2973 | 1658.55 | 1658.94 | 11004.9 | 1    | 2292.6 | 71.9 | 2  | K.AVAASKERSGVSLAALK.K                                               |
| *                 | Hs293FLP_TREX_Ti_106.2   | 4.2131 | 0.1736 | 1786.63 | 1787.11 | 8881.8  | 2    | 1187.9 | 58.8 | 1  | K.AVAASKERSGVSLAALK.K.A                                             |
| *                 | Hs293FLP_TREX_Ti_106.2   | 3.0895 | 0.171  | 1259.61 | 1259.49 | 4520.5  | 3    | 723    | 77.3 | 1  | K.ERSGVSLAALK.K.A                                                   |
| *                 | Hs293FLP_TREX_Ti_102.1   | 3.0132 | 0.1626 | 846.13  | 846.015 | 3355.5  | 2    | 954.3  | 93.8 | 2  | R.SGVSLAALK.K                                                       |
| *                 | HsFLAG-MOCK_300mM_T      | 3.4949 | 0.1712 | 974.56  | 974.189 | 4235.3  | 2    | 983.5  | 94.4 | 2  | R.SGVSLAALK.K.A                                                     |
| *                 | HsFLAG-MOCK_300mM_T      | 3.3324 | 0.347  | 1235.45 | 1236.41 | 7986.8  | 1    | 1354.2 | 72.7 | 1  | K.KALAAAGYDVEK.N                                                    |
| *                 | Hs293FLP_TREX_Ti_103.1   | 3.8244 | 0.3765 | 1235.5  | 1236.41 | 5633.7  | 1    | 876.3  | 72.7 | 2  | K.KALAAAGYDVEK.N                                                    |
| *                 | Hs293FLP_TREX_Ti_103.1   | 4.2764 | 0.2988 | 1236.31 | 1236.41 | 8294.8  | 1    | 2277.5 | 90.9 | 5  | K.KALAAAGYDVEK.N                                                    |
| *                 | Hs293FLP-MG_Ti_302.133   | 2.9735 | 0.2799 | 1107.49 | 1108.24 | 9558.8  | 1    | 1210.9 | 70   | 4  | K.ALAAAGYDVEK.N                                                     |
| *                 | HsHeLa3_Ti_102.1555.155  | 2.8055 | 0.3679 | 1107.57 | 1108.24 | 8392.9  | 2    | 806    | 65   | 1  | K.ALAAAGYDVEK.N                                                     |
| *                 | Hs293FLP_TREX_Ti_102.1   | 3.2612 | 0.3612 | 1107.6  | 1108.24 | 9082.9  | 1    | 1240   | 70   | 4  | K.ALAAAGYDVEK.N                                                     |
| *                 | Hs293FLP_TREX_Ti_102.1   | 3.37   | 0.2203 | 1108.28 | 1108.24 | 5059.1  | 1    | 1168.4 | 85   | 2  | K.ALAAAGYDVEK.N                                                     |
| *                 | HsHeLa3_Ti_102.1562.156  | 3.2598 | 0.2416 | 1108.48 | 1108.24 | 4781.3  | 1    | 1268.8 | 90   | 1  | K.ALAAAGYDVEK.N                                                     |
| *                 | HsGST-MOCK_Ti_402.186    | 3.2664 | 0.1912 | 1109.14 | 1108.24 | 6550.6  | 1    | 1106.2 | 80   | 2  | K.ALAAAGYDVEK.N                                                     |
| *                 | Hs293FLP_TREX_Ti_103.1   | 4.3703 | 0.3994 | 1579.29 | 1579.71 | 6540.5  | 1    | 1574.4 | 75   | 2  | K.ALAAAGYDVEKNNSR.I                                                 |
| *                 | Hs293FLP_TREX_Ti_105.1   | 3.0205 | 0.2991 | 1260.42 | 1261.51 | 5067.2  | 1    | 605.7  | 68.2 | 1  | K.SLVSKGTLVQTK.G                                                    |
| *                 | Hs293FLP_TREX_Ti_105.1   | 3.7512 | 0.3731 | 1261.67 | 1261.51 | 5381.4  | 1    | 1225.2 | 86.4 | 1  | K.SLVSKGTLVQTK.G                                                    |
| *                 | Hs293FLP_TREX_Ti_106.2   | 4.968  | 0.4135 | 2055.48 | 2054.35 | 10342.6 | 1    | 1603   | 57.5 | 1  | K.SLVSKGTLVQTKGTGASGSFK.L                                           |
| *                 | Hs293FLP_TREX_Ti_105.1   | 4.0346 | 0.3258 | 1539.48 | 1539.73 | 6063.8  | 1    | 1084   | 70   | 4  | K.GTLVQTKGTGASGSFK.L                                                |
| *                 | Hs293FLP_TREX_Ti_105.1   | 3.2555 | 0.1904 | 1167.28 | 1167.31 | 8367.3  | 1    | 1260.1 | 72.7 | 2  | K.GTGASGSFKLNK.K                                                    |
| *                 | Hs293FLP_TREX_Ti_106.2   | 3.5403 | 0.2379 | 1295.64 | 1295.48 | 8182.4  | 9    | 845    | 62.5 | 2  | K.GTGASGSFKLNKK.A                                                   |
| *                 | HsGST-MOCK_Ti_102.066    | 2.2499 | 0.1004 | 784.55  | 784.934 | 3732.6  | 3    | 296.6  | 62.5 | 2  | K.KPAAAAGAK.K                                                       |
| gi 5902102 ref NF |                          | 18     | 209    | 0.37    | 119     | 13282   | 11.6 | U      |      |    | small nuclear ribonucleoprotein D1 polypeptide 16kDa [Homo sapiens] |

|                    |                          |        |        |         |         |        |      |        |      |    |                                                                      |
|--------------------|--------------------------|--------|--------|---------|---------|--------|------|--------|------|----|----------------------------------------------------------------------|
| *                  | HsFLAG-Control_293_Ti_10 | 2.5471 | 0.1761 | 1269.74 | 1270.47 | 6835   | 2    | 623.4  | 70   | 1  | K.LSHETVTIELK.N                                                      |
| *                  | Hs283FLP_Ti_105.1486.14  | 2.5422 | 0.2211 | 1270.63 | 1270.47 | 4912   | 1    | 787.9  | 80   | 1  | K.LSHETVTIELK.N                                                      |
| *                  | Hs293FLP-MG_Ti_204.204   | 4.3126 | 0.2488 | 1555.39 | 1555.78 | 7087.7 | 1    | 1602.8 | 56.2 | 1  | K.NREPVQLETLSIR.G                                                    |
| *                  | HsFLAG-Control_MG_293_   | 3.8284 | 0.3156 | 1555.47 | 1555.78 | 8824.5 | 1    | 1225.2 | 70.8 | 27 | K.NREPVQLETLSIR.G                                                    |
| *                  | HsHeLa3_Ti_105.1958.195  | 3.9255 | 0.3656 | 1555.84 | 1555.78 | 6140.3 | 1    | 1179.7 | 79.2 | 6  | K.NREPVQLETLSIR.G                                                    |
| *                  | Hs293FLP_Ti_304.1881.18  | 4.6008 | 0.2855 | 1556.2  | 1555.78 | 6212   | 1    | 1354.7 | 52.1 | 2  | K.NREPVQLETLSIR.G                                                    |
| *                  | Hs283FLP_Ti_105.1699.16  | 4.0616 | 0.3743 | 1556.26 | 1555.78 | 6424   | 1    | 1156.1 | 79.2 | 7  | K.NREPVQLETLSIR.G                                                    |
| *                  | HsFLAG-Control_293_Ti_20 | 4.1111 | 0.3386 | 1556.45 | 1555.78 | 7330.4 | 1    | 1448.1 | 79.2 | 9  | K.NREPVQLETLSIR.G                                                    |
| *                  | HsHeLa_Control-MG_Ti_10  | 4.6141 | 0.293  | 1556.85 | 1555.78 | 7111.6 | 1    | 1524.5 | 54.2 | 1  | K.NREPVQLETLSIR.G                                                    |
| *                  | Hs293FLP-MG_Ti_203.514   | 4.7048 | 0.4281 | 2287.77 | 2288.69 | 4543.1 | 1    | 972.8  | 63.2 | 9  | R.YFILPDSLPLDTHLLVDVEPK.V                                            |
| *                  | HsF-IP-293_Ti_204.4677.4 | 4.7171 | 0.4051 | 2287.82 | 2288.69 | 4154.4 | 1    | 1007.4 | 68.4 | 78 | R.YFILPDSLPLDTHLLVDVEPK.V                                            |
| *                  | Hs293FLP-MG_Ti_202.534   | 5.5985 | 0.3502 | 2288.33 | 2288.69 | 7056.1 | 1    | 1445.5 | 42.1 | 2  | R.YFILPDSLPLDTHLLVDVEPK.V                                            |
| *                  | HsFLAG-Control_293_Ti_20 | 5.2219 | 0.3592 | 2288.35 | 2288.69 | 6619.3 | 2    | 984.2  | 36.8 | 2  | R.YFILPDSLPLDTHLLVDVEPK.V                                            |
| *                  | HsHeLa_Control-MG_Ti_20  | 4.9572 | 0.3738 | 2288.36 | 2288.69 | 7166.5 | 1    | 1260.7 | 39.5 | 2  | R.YFILPDSLPLDTHLLVDVEPK.V                                            |
| *                  | HsF-IP-293-MG_Ti_102.46  | 4.9436 | 0.4529 | 2288.65 | 2288.69 | 4384.5 | 1    | 709.1  | 57.9 | 15 | R.YFILPDSLPLDTHLLVDVEPK.V                                            |
| *                  | HsFLAG-Control_HeLa_S10  | 4.9066 | 0.3861 | 2288.67 | 2288.69 | 4787.2 | 1    | 891.6  | 63.2 | 38 | R.YFILPDSLPLDTHLLVDVEPK.V                                            |
| *                  | HsF-IP-293-MG_Ti_102.43  | 3.945  | 0.3364 | 2289.02 | 2288.69 | 8285.5 | 3    | 991.9  | 35.5 | 1  | R.YFILPDSLPLDTHLLVDVEPK.V                                            |
| *                  | HsGST-MOCK_Ti_403.533    | 5.2978 | 0.4457 | 2289.04 | 2288.69 | 5334.1 | 1    | 1220.6 | 68.4 | 7  | R.YFILPDSLPLDTHLLVDVEPK.V                                            |
| gi 4506681 ref NF  |                          | 5      | 17     | 0.367   | 158     | 18431  | 10.3 | U      |      |    | ribosomal protein S11 [Homo sapiens]                                 |
| *                  | HsGST-MOCK_Ti_103.115    | 3.3044 | 0.2115 | 1231.7  | 1230.45 | 6754.4 | 1    | 1276.4 | 85   | 3  | K.RVLLGETGKEK.L                                                      |
| *                  | HsGST-MOCK_Ti_402.189    | 2.605  | 0.2842 | 1138.77 | 1139.25 | 7203.5 | 1    | 881.9  | 83.3 | 1  | K.EAIEGTYIDK.K                                                       |
| *                  | HsGST-MOCK_Ti_104.149    | 3.3523 | 0.2202 | 1136.59 | 1136.3  | 7148.1 | 1    | 1154.1 | 92.9 | 2  | R.RDYLYHIR.K                                                         |
| *                  | HsGST-MOCK_Ti_406.254    | 3.2736 | 0.1953 | 1349.19 | 1348.53 | 5290.6 | 2    | 565.1  | 65   | 1  | K.NMSVHLSPCFR.D                                                      |
| *                  | Hs293FLP-MG_Ti_203.262   | 4.5515 | 0.4632 | 1986.4  | 1987.23 | 6809.1 | 1    | 965.1  | 58.8 | 10 | R.DVQIGDIVTVGECRPLSK.T                                               |
| gi 4505417 ref NF  |                          | 4      | 27     | 0.364   | 231     | 25953  | 6.3  | U      |      |    | NAD(P)H dehydrogenase, quinone 2 [Homo sapiens]                      |
| *                  | HsHeLa_Control-MG_Ti_20  | 4.2992 | 0.4118 | 2583.79 | 2585.79 | 5564.3 | 1    | 923.9  | 52.3 | 6  | K.DITGTLNPEVFNHYGVETHEAYK.Q                                          |
| *                  | HsHeLa_Control-MG_Ti_20  | 5.4137 | 0.3586 | 2498.1  | 2497.98 | 7484.2 | 1    | 1609.2 | 55   | 11 | R.EADLVIFQFPLYWFSVPAILK.G                                            |
| *                  | HsHeLa_Control-MG_Ti_20  | 5.381  | 0.3994 | 2434.49 | 2433.73 | 3806.6 | 1    | 736    | 57.1 | 7  | R.VLCQGFAFDIPGFYDSGLLQGK.L                                           |
| *                  | HsHeLa_Control-MG_Ti_20  | 4.1052 | 0.4013 | 1986.45 | 1987.22 | 5555.4 | 1    | 1116.7 | 67.6 | 3  | K.VLAPQISFAPEIASEEER.K                                               |
| gi 14211889 ref NF |                          | 7      | 21     | 0.364   | 99      | 11250  | 4.9  | U      |      |    | dpy-30-like protein [Homo sapiens]                                   |
| *                  | HsGST-MOCK_Ti_304.005    | 4.5309 | 0.3482 | 2125.76 | 2126.59 | 4492.3 | 1    | 987.5  | 65.8 | 2  | R.AYLDQTVVPILLQGLAVLAK.E                                             |
| *                  | HsFLAG-Control_HeLa_NE   | 4.5554 | 0.3746 | 2125.8  | 2126.59 | 3974.2 | 1    | 587.8  | 55.3 | 4  | R.AYLDQTVVPILLQGLAVLAK.E                                             |
| *                  | HsHeLa3_Ti_104.0027.002  | 6.2807 | 0.3965 | 2126.46 | 2126.59 | 7790.5 | 1    | 2195.2 | 48.7 | 4  | R.AYLDQTVVPILLQGLAVLAK.E                                             |
| *                  | HsFLAG-Control_HeLa_NE   | 5.7461 | 0.3563 | 2126.8  | 2126.59 | 8982.6 | 1    | 2224.4 | 44.7 | 4  | R.AYLDQTVVPILLQGLAVLAK.E                                             |
| *                  | HsHeLa3_Ti_104.0014.001  | 4.041  | 0.3103 | 2127.02 | 2126.59 | 3512.7 | 1    | 505.9  | 55.3 | 3  | R.AYLDQTVVPILLQGLAVLAK.E                                             |
| *                  | HsFLAG-MOCK_300mM_T      | 4.643  | 0.1872 | 1889.55 | 1888.22 | 6998.1 | 1    | 1702.4 | 48.3 | 2  | K.ERPPNPIEFASYLLK.N                                                  |
| *                  | HsHeLa3_Ti_106.3420.342  | 3.7671 | 0.3853 | 1889.7  | 1888.22 | 6501.8 | 1    | 575    | 50   | 2  | K.ERPPNPIEFASYLLK.N                                                  |
| gi 15431293 ref NF |                          | 9      | 20     | 0.363   | 204     | 24146  | 11.6 | U      |      |    | ribosomal protein L15 [Homo sapiens]                                 |
| gi 88998872 ref X  |                          | 9      | 20     | 0.363   | 204     | 24174  | 11.6 | U      |      |    | PREDICTED: similar to ribosomal protein L15 isoform 6 [Homo sapiens] |
| gi 88998870 ref X  |                          | 9      | 20     | 0.363   | 204     | 24174  | 11.6 | U      |      |    | PREDICTED: similar to ribosomal protein L15 isoform 5 [Homo sapiens] |
| gi 88998868 ref X  |                          | 9      | 20     | 0.363   | 204     | 24174  | 11.6 | U      |      |    | PREDICTED: similar to ribosomal protein L15 isoform 4 [Homo sapiens] |
| gi 88998866 ref X  |                          | 9      | 20     | 0.363   | 204     | 24174  | 11.6 | U      |      |    | PREDICTED: similar to ribosomal protein L15 isoform 3 [Homo sapiens] |
| gi 88998864 ref X  |                          | 9      | 20     | 0.363   | 204     | 24174  | 11.6 | U      |      |    | PREDICTED: similar to ribosomal protein L15 isoform 1 [Homo sapiens] |
| gi 88992466 ref X  |                          | 9      | 20     | 0.363   | 204     | 24174  | 11.6 | U      |      |    | PREDICTED: similar to ribosomal protein L15 isoform 5 [Homo sapiens] |
| gi 88992463 ref X  |                          | 9      | 20     | 0.363   | 204     | 24174  | 11.6 | U      |      |    | PREDICTED: similar to ribosomal protein L15 isoform 4 [Homo sapiens] |
| gi 88992460 ref X  |                          | 9      | 20     | 0.363   | 204     | 24174  | 11.6 | U      |      |    | PREDICTED: similar to ribosomal protein L15 isoform 3 [Homo sapiens] |
| gi 88992455 ref X  |                          | 9      | 20     | 0.363   | 204     | 24174  | 11.6 | U      |      |    | PREDICTED: similar to ribosomal protein L15 isoform 1 [Homo sapiens] |
| *                  | Hs293FLP_TREX_Ti_106.2   | 4.4638 | 0.4114 | 1706.58 | 1706.95 | 5016.1 | 1    | 684.4  | 60   | 2  | K.GATYGKPVHGHVNLK.F                                                  |
| *                  | Hs293FLP_TREX_Ti_106.2   | 2.7548 | 0.2742 | 1128.42 | 1129.31 | 4058.8 | 2    | 467.5  | 72.2 | 1  | K.PVHHGVNLK.F                                                        |



|                    |                         |        |        |         |         |         |   |                                            |      |    |                                       |
|--------------------|-------------------------|--------|--------|---------|---------|---------|---|--------------------------------------------|------|----|---------------------------------------|
|                    | Hs293FLP_TREX_Ti_102.1  | 3.2226 | 0.1131 | 1019.35 | 1019.1  | 5655.2  | 1 | 975.4                                      | 87.5 | 4  | R.SLQSVAEER.A                         |
|                    | Hs293FLP_TREX_Ti_102.1  | 4.6107 | 0.3627 | 1661.4  | 1661.81 | 5142.6  | 1 | 1037.3                                     | 73.1 | 3  | R.VLNSYWVGEDSTYK.F                    |
|                    | HsHeLa_Control-MG_Ti_10 | 3.6586 | 0.2761 | 1506.91 | 1505.8  | 6236.2  | 1 | 1175.1                                     | 72.7 | 4  | K.FFEVILIDPFHK.A                      |
|                    | Hs293FLP_TREX_Ti_104.1  | 3.3    | 0.2305 | 1259.38 | 1259.41 | 5834    | 1 | 902                                        | 77.8 | 2  | R.RNPDTQWITK.P                        |
|                    | Hs293FLP_TREX_Ti_106.2  | 3.544  | 0.3343 | 1720.53 | 1720.97 | 5980.7  | 1 | 845.3                                      | 69.2 | 1  | R.RNPDTQWITKPVHK.H                    |
|                    | Hs293FLP_TREX_Ti_106.2  | 3.5201 | 0.3645 | 1564.6  | 1564.78 | 7642.3  | 1 | 805.9                                      | 62.5 | 1  | R.NPDTQWITKPVHK.H                     |
|                    | Hs293FLP_TREX_Ti_106.2  | 2.8404 | 0.25   | 1011.44 | 1012.12 | 4749.1  | 2 | 368.4                                      | 75   | 2  | K.FHHTIGGSR.R                         |
| gij 4885375 ref NF | 31                      | 68     | 0.362  | 213     | 21365   | 10.9    | U | H1 histone family, member 2 [Homo sapiens] |      |    |                                       |
| *                  | Hs293FLP_TREX_Ti_106.2  | 4.0392 | 0.4308 | 1865.9  | 1867.16 | 10474.1 | 1 | 1062.3                                     | 52.8 | 2  | K.AGGTPRKASGPPVSELITK.A               |
| *                  | Hs293FLP_TREX_Ti_106.2  | 4.9301 | 0.4712 | 1867.35 | 1867.16 | 7196.7  | 1 | 1479.3                                     | 44.4 | 2  | K.AGGTPRKASGPPVSELITK.A               |
|                    | Hs293FLP_TREX_Ti_105.1  | 3.0697 | 0.3063 | 1326.44 | 1327.56 | 5625.4  | 1 | 525.1                                      | 54.2 | 2  | R.KASGPPVSELITK.A                     |
|                    | HsFLAG-MOCK_300mM_T     | 4.3832 | 0.346  | 1327.6  | 1327.56 | 7311.6  | 1 | 1540.1                                     | 79.2 | 4  | R.KASGPPVSELITK.A                     |
|                    | Hs293FLP_TREX_Ti_105.1  | 4.5528 | 0.2867 | 1327.6  | 1327.56 | 6535    | 1 | 1711.1                                     | 83.3 | 3  | R.KASGPPVSELITK.A                     |
|                    | Hs293FLP_TREX_Ti_105.1  | 4.1842 | 0.2215 | 1327.89 | 1327.56 | 4082.6  | 1 | 1092.6                                     | 58.3 | 2  | R.KASGPPVSELITK.A                     |
|                    | Hs293FLP-MG_Ti_302.158  | 2.2832 | 0.2134 | 1198.39 | 1199.39 | 5448.6  | 5 | 377.6                                      | 59.1 | 1  | K.ASGPPVSELITK.A                      |
|                    | HsHeLa3_Ti_103.1780.178 | 2.1262 | 0.1215 | 1198.67 | 1199.39 | 7333.6  | 3 | 598.9                                      | 59.1 | 1  | K.ASGPPVSELITK.A                      |
|                    | HsFLAG-MOCK_300mM_T     | 3.2152 | 0.232  | 1198.92 | 1199.39 | 6681.5  | 1 | 820.6                                      | 72.7 | 7  | K.ASGPPVSELITK.A                      |
|                    | HsGST-MOCK_Ti_303.200   | 2.7091 | 0.2074 | 1199.13 | 1199.39 | 6241.3  | 1 | 738.8                                      | 72.7 | 1  | K.ASGPPVSELITK.A                      |
|                    | Hs293FLP_TREX_Ti_106.2  | 4.5743 | 0.2973 | 1658.55 | 1658.94 | 11004.9 | 1 | 2292.6                                     | 71.9 | 2  | K.AVAASKERSGVSLAALK.K                 |
|                    | Hs293FLP_TREX_Ti_106.2  | 4.2131 | 0.1736 | 1786.63 | 1787.11 | 8881.8  | 2 | 1187.9                                     | 58.8 | 1  | K.AVAASKERSGVSLAALK.K.A               |
|                    | Hs293FLP_TREX_Ti_106.2  | 3.0895 | 0.171  | 1259.61 | 1259.49 | 4520.5  | 3 | 723                                        | 77.3 | 1  | K.ERSGVSLAALK.K.A                     |
|                    | Hs293FLP_TREX_Ti_102.1  | 3.0132 | 0.1626 | 846.13  | 846.015 | 3355.5  | 2 | 954.3                                      | 93.8 | 2  | R.SGVSLAALK.K                         |
|                    | HsFLAG-MOCK_300mM_T     | 3.4949 | 0.1712 | 974.56  | 974.189 | 4235.3  | 2 | 983.5                                      | 94.4 | 2  | R.SGVSLAALK.K.A                       |
|                    | HsFLAG-MOCK_300mM_T     | 3.3324 | 0.347  | 1235.45 | 1236.41 | 7986.8  | 1 | 1354.2                                     | 72.7 | 1  | K.KALAAAGYDVEK.N                      |
|                    | Hs293FLP_TREX_Ti_103.1  | 3.8244 | 0.3765 | 1235.5  | 1236.41 | 5633.7  | 1 | 876.3                                      | 72.7 | 2  | K.KALAAAGYDVEK.N                      |
|                    | Hs293FLP_TREX_Ti_103.1  | 4.2764 | 0.2988 | 1236.31 | 1236.41 | 8294.8  | 1 | 2277.5                                     | 90.9 | 5  | K.KALAAAGYDVEK.N                      |
|                    | Hs293FLP-MG_Ti_302.133  | 2.9735 | 0.2799 | 1107.49 | 1108.24 | 9558.8  | 1 | 1210.9                                     | 70   | 4  | K.ALAAAGYDVEK.N                       |
|                    | HsHeLa3_Ti_102.1555.155 | 2.8055 | 0.3679 | 1107.57 | 1108.24 | 8392.9  | 2 | 806                                        | 65   | 1  | K.ALAAAGYDVEK.N                       |
|                    | Hs293FLP_TREX_Ti_102.1  | 3.2612 | 0.3612 | 1107.6  | 1108.24 | 9082.9  | 1 | 1240                                       | 70   | 4  | K.ALAAAGYDVEK.N                       |
|                    | Hs293FLP_TREX_Ti_102.1  | 3.37   | 0.2203 | 1108.28 | 1108.24 | 5059.1  | 1 | 1168.4                                     | 85   | 2  | K.ALAAAGYDVEK.N                       |
|                    | HsHeLa3_Ti_102.1562.156 | 3.2598 | 0.2416 | 1108.48 | 1108.24 | 4781.3  | 1 | 1268.8                                     | 90   | 1  | K.ALAAAGYDVEK.N                       |
|                    | HsGST-MOCK_Ti_402.186   | 3.2664 | 0.1912 | 1109.14 | 1108.24 | 6550.6  | 1 | 1106.2                                     | 80   | 2  | K.ALAAAGYDVEK.N                       |
|                    | Hs293FLP_TREX_Ti_103.1  | 4.3703 | 0.3994 | 1579.29 | 1579.71 | 6540.5  | 1 | 1574.4                                     | 75   | 2  | K.ALAAAGYDVEKNNSR.I                   |
|                    | Hs293FLP_TREX_Ti_105.1  | 3.0205 | 0.2991 | 1260.42 | 1261.51 | 5067.2  | 1 | 605.7                                      | 68.2 | 1  | K.SLVSKGTLVQTK.G                      |
|                    | Hs293FLP_TREX_Ti_105.1  | 3.7512 | 0.3731 | 1261.67 | 1261.51 | 5381.4  | 1 | 1225.2                                     | 86.4 | 1  | K.SLVSKGTLVQTK.G                      |
|                    | Hs293FLP_TREX_Ti_106.2  | 4.968  | 0.4135 | 2055.48 | 2054.35 | 10342.6 | 1 | 1603                                       | 57.5 | 1  | K.SLVSKGTLVQTKGTGASGSFK.L             |
|                    | Hs293FLP_TREX_Ti_105.1  | 4.0346 | 0.3258 | 1539.48 | 1539.73 | 6063.8  | 1 | 1084                                       | 70   | 4  | K.GTLVQTKGTGASGSFK.L                  |
|                    | Hs293FLP_TREX_Ti_105.1  | 3.2555 | 0.1904 | 1167.28 | 1167.31 | 8367.3  | 1 | 1260.1                                     | 72.7 | 2  | K.GTGASGSFKLNK.K                      |
|                    | Hs293FLP_TREX_Ti_106.2  | 3.5403 | 0.2379 | 1295.64 | 1295.48 | 8182.4  | 9 | 845                                        | 62.5 | 2  | K.GTGASGSFKLNKK.A                     |
| gij 5729730 ref NF | 12                      | 60     | 0.361  | 504     | 56770   | 5.9     | U | apoptosis inhibitor 5 [Homo sapiens]       |      |    |                                       |
| *                  | HsFLAG-Control_HeLa_NE  | 5.1207 | 0.4493 | 1744.59 | 1744.9  | 7396.2  | 1 | 2044.2                                     | 80   | 12 | R.NYGILADATEQVQGQHK.D                 |
| *                  | HsFLAG-Control_HeLa_NE  | 3.9787 | 0.195  | 1221.28 | 1221.4  | 6518    | 2 | 1344.7                                     | 80   | 7  | K.DAYQVILDGVK.G                       |
| *                  | HsFLAG-Control_HeLa_NE  | 3.9989 | 0.2818 | 1472.09 | 1472.64 | 4050    | 1 | 842.6                                      | 79.2 | 6  | K.ELPQFATGENLPR.V                     |
| *                  | HsFLAG-Control_HeLa_NE  | 5.9578 | 0.3983 | 3207.5  | 3207.65 | 8503.7  | 1 | 1410.1                                     | 30.4 | 5  | R.VADILTQLLQTDSDAEFNLVNNALLSIFK.M     |
| *                  | HsFLAG-Control_HeLa_NE  | 5.3931 | 0.4178 | 1905.66 | 1904.17 | 9473.8  | 1 | 2185.1                                     | 70.6 | 13 | K.GTLGGLFSQILQGEDIVR.E                |
| *                  | HsFLAG-Control_HeLa_NE  | 4.0427 | 0.148  | 1291.43 | 1290.45 | 5967.6  | 1 | 1180.1                                     | 85   | 4  | K.EVEELILTESK.K                       |
| *                  | HsFLAG-Control_HeLa_NE  | 3.3972 | 0.1957 | 1419.43 | 1418.63 | 7019.2  | 1 | 1088.9                                     | 81.8 | 1  | K.EVEELILTESK.V                       |
| *                  | HsFLAG-MOCK_300mM_T     | 3.7438 | 0.3101 | 3892.23 | 3890.19 | 6736.3  | 1 | 815.7                                      | 25   | 1  | R.QQLVELVAEQADLEQTFNPSDPDCVDRLLQCTR.Q |
| *                  | HsFLAG-Control_HeLa_NE  | 3.7828 | 0.172  | 1142.47 | 1142.38 | 7690.7  | 1 | 1308.1                                     | 88.9 | 5  | K.ITNNINVLK.D                         |

|                   |                          |        |        |         |         |         |     |        |      |    |                                                                             |
|-------------------|--------------------------|--------|--------|---------|---------|---------|-----|--------|------|----|-----------------------------------------------------------------------------|
| *                 | HsFLAG-Control_HeLa_NE   | 2.8992 | 0.173  | 1217.54 | 1217.41 | 4572.3  | 1   | 645.8  | 72.2 | 1  | K.DLFHIPPSYK.S                                                              |
| *                 | HsFLAG-MOCK_300mM_T      | 3.0866 | 0.2359 | 2030.91 | 2029.39 | 3858.6  | 1   | 357.7  | 47.1 | 1  | K.STVTLSWKPVQKVEIGQK.R                                                      |
| *                 | HsFLAG-Control_HeLa_NE   | 3.5192 | 0.3605 | 1464.64 | 1464.53 | 5064.4  | 1   | 910.3  | 81.8 | 4  | K.YSSNLGNFNYSR.S                                                            |
| gi 4506185 ref NF |                          | 5      | 11     | 0.36    | 261     | 29484   | 7.7 | U      |      |    | proteasome alpha 4 subunit [Homo sapiens]                                   |
| *                 | HsFLAG-Control_293_Ti_20 | 4.6652 | 0.3363 | 2594.29 | 2594.82 | 7165.4  | 1   | 700.3  | 41.3 | 2  | K.LNEDMACSVAGITSDANVLTNELR.L                                                |
| *                 | HsHeLa_Control-MG_Ti_20  | 4.8627 | 0.2987 | 2696.06 | 2696.05 | 5770.6  | 1   | 926.8  | 52.4 | 2  | R.YLLQYQEPIPCQLVTALCDIK.Q                                                   |
| *                 | HsHeLa_Control-MG_Ti_10  | 4.3827 | 0.4818 | 2205.89 | 2205.35 | 4395.1  | 1   | 1197.7 | 72.2 | 3  | K.HYGFQLYQSDPSGNYGGWK.A                                                     |
| *                 | HsFLAG-Control_293_Ti_20 | 3.3765 | 0.2719 | 1609.32 | 1608.82 | 7031.7  | 1   | 818.6  | 56.7 | 1  | K.ATCIGNNSAAAASVSMK.Q                                                       |
| *                 | HsFLAG-Control_MG_293_   | 2.9645 | 0.1698 | 1432.37 | 1431.67 | 6075.5  | 3   | 641.1  | 58.3 | 3  | K.LSAEKVEIATLTR.E                                                           |
| gi 7705696 ref NF |                          | 9      | 27     | 0.36    | 172     | 19206   | 5.4 | U      |      |    | endoplasmic reticulum thioredoxin superfamily member, 18 kDa [Homo sapiens] |
| *                 | Hs293FLP_Ti_306.2459.24  | 3.5281 | 0.3229 | 1125.62 | 1125.24 | 5669.9  | 1   | 1107.2 | 87.5 | 4  | K.GFGDHIHWR.T                                                               |
| *                 | Hs293FLP_Ti_304.2619.26  | 4.1859 | 0.3719 | 1552.49 | 1550.9  | 3021.6  | 1   | 563.1  | 71.4 | 5  | K.EAAASGLPLMVIHK.S                                                          |
| *                 | Hs293FLP_Ti_302.2294.22  | 2.1774 | 0.1985 | 989.92  | 990.188 | 3286.2  | 3   | 501.1  | 75   | 1  | R.IFLDPSGK.V                                                                |
| *                 | HsFLAG-MOCK_300mM_T      | 2.9818 | 0.2823 | 2682.07 | 2683.04 | 4778.9  | 1   | 487.9  | 43.5 | 2  | R.IFLDPSGKVHPEIINENGNPSYK.Y                                                 |
| *                 | Hs293FLP_Ti_305.2338.23  | 3.2088 | 0.2388 | 2682.08 | 2683.04 | 5246.6  | 1   | 512.3  | 43.5 | 2  | R.IFLDPSGKVHPEIINENGNPSYK.Y                                                 |
| *                 | Hs293FLP-MG_Ti_205.259   | 4.0189 | 0.2096 | 2682.89 | 2683.04 | 5481.3  | 1   | 649.8  | 31.5 | 1  | R.IFLDPSGKVHPEIINENGNPSYK.Y                                                 |
| *                 | HsHeLa_Control-MG_Ti_10  | 4.7688 | 0.2098 | 2685.75 | 2683.04 | 4832.8  | 1   | 721.9  | 34.8 | 3  | R.IFLDPSGKVHPEIINENGNPSYK.Y                                                 |
| *                 | HsHeLa_Control-MG_Ti_20  | 4.2752 | 0.4686 | 1710.67 | 1711.87 | 3639.8  | 1   | 985.5  | 82.1 | 8  | K.VHPEIINENGNPSYK.Y                                                         |
| *                 | Hs293FLP-MG_Ti_203.299   | 3.2298 | 0.3328 | 1649.63 | 1649.9  | 10870.4 | 1   | 1769   | 73.1 | 1  | K.YFYVSAEQVVQGMK.E                                                          |
| gi 7661958 ref NF |                          | 74     | 346    | 0.354   | 920     | 106122  | 10  | U      |      |    | BCL2-associated transcription factor 1 [Homo sapiens]                       |
|                   | Hs293FLP-MG_Ti_103.116   | 4.2686 | 0.2971 | 1442.85 | 1442.57 | 4496.5  | 2   | 911.5  | 75   | 9  | K.KAEGEPQEE SPLK.S                                                          |
|                   | HsF-IP-293-MG_Ti_105.15  | 4.2602 | 0.2754 | 2608.4  | 2609.68 | 4613.8  | 1   | 427    | 42.9 | 3  | K.SQECPKDTFEHDPSESIDFNK.S                                                   |
|                   | Hs293FLP-MG_Ti_306.237   | 3.692  | 0.4131 | 2608.41 | 2609.68 | 4254.9  | 1   | 519.8  | 47.6 | 1  | K.SQECPKDTFEHDPSESIDFNK.S                                                   |
|                   | Hs293FLP-MG_Ti_203.190   | 4.7394 | 0.2621 | 2608.75 | 2609.68 | 7028.8  | 1   | 1057.3 | 36.9 | 1  | K.SQECPKDTFEHDPSESIDFNK.S                                                   |
|                   | Hs293FLP-MG_Ti_203.190   | 4.0194 | 0.4754 | 2608.86 | 2609.68 | 4719.7  | 1   | 683.3  | 52.4 | 2  | K.SQECPKDTFEHDPSESIDFNK.S                                                   |
|                   | Hs283FLP_Ti_105.1581.15  | 4.0195 | 0.3453 | 2608.88 | 2609.68 | 4522.5  | 1   | 351.3  | 40.5 | 5  | K.SQECPKDTFEHDPSESIDFNK.S                                                   |
|                   | HsFLAG-Control_HeLa_NE   | 3.8143 | 0.3422 | 2608.92 | 2609.68 | 5472.9  | 1   | 396.8  | 40.5 | 1  | K.SQECPKDTFEHDPSESIDFNK.S                                                   |
|                   | HsF-IP-293-MG_Ti_105.18  | 4.8778 | 0.3121 | 2609.15 | 2609.68 | 5020.4  | 1   | 769.3  | 35.7 | 5  | K.SQECPKDTFEHDPSESIDFNK.S                                                   |
|                   | HsHeLa_Control_Ti_103.20 | 3.6894 | 0.2965 | 2609.65 | 2609.68 | 4258.9  | 1   | 715.4  | 39.3 | 1  | K.SQECPKDTFEHDPSESIDFNK.S                                                   |
|                   | HsFLAG-Control_HeLa_NE   | 4.4793 | 0.2928 | 2609.78 | 2609.68 | 5503.5  | 1   | 994.4  | 39.3 | 2  | K.SQECPKDTFEHDPSESIDFNK.S                                                   |
|                   | Hs283FLP_Ti_104.2388.23  | 4.4679 | 0.2976 | 2609.93 | 2609.68 | 4879.3  | 1   | 929.9  | 39.3 | 4  | K.SQECPKDTFEHDPSESIDFNK.S                                                   |
|                   | Hs293FLP-MG_Ti_105.200   | 3.5827 | 0.2809 | 2610.54 | 2609.68 | 4295.5  | 1   | 410.6  | 42.9 | 4  | K.SQECPKDTFEHDPSESIDFNK.S                                                   |
|                   | Hs293FLP-MG_Ti_105.200   | 3.8551 | 0.2815 | 2611.6  | 2609.68 | 4440.2  | 1   | 544.1  | 34.5 | 1  | K.SQECPKDTFEHDPSESIDFNK.S                                                   |
|                   | HsHeLa_Control_Ti_103.21 | 3.6537 | 0.3622 | 2612.16 | 2609.68 | 4472.1  | 1   | 539.3  | 47.6 | 4  | K.SQECPKDTFEHDPSESIDFNK.S                                                   |
|                   | HsFLAG-Control_HeLa_NE   | 5.0441 | 0.3677 | 1910.23 | 1910.95 | 5038.6  | 1   | 1211.9 | 73.3 | 5  | K.DTFEHPSESIDFNK.S                                                          |
|                   | Hs293FLP-MG_Ti_202.289   | 4.8623 | 0.4437 | 2081.58 | 2082.19 | 4344.8  | 1   | 1036   | 63.2 | 16 | K.SSATSGDIWPGLSAYDNSPR.S                                                    |
|                   | HsHeLa_Control-MG_Ti_20  | 3.6063 | 0.4059 | 1843.57 | 1842.93 | 6122.5  | 1   | 906.8  | 63.3 | 2  | K.NTPSQSHSHIQHSPER.S                                                        |
|                   | Hs293FLP_Ti_306.2264.22  | 3.4083 | 0.2608 | 1721.99 | 1720.89 | 6373.3  | 1   | 727.9  | 57.1 | 4  | R.YSPSQNSPIHHIPSR.R                                                         |
|                   | Hs283FLP_Ti_102.1419.14  | 2.3846 | 0.4217 | 1501.45 | 1502.53 | 6003.2  | 1   | 511.6  | 53.8 | 1  | R.SSFYPDGGDQETAK.T                                                          |
|                   | HsHeLa_Control_Ti_102.14 | 2.3205 | 0.185  | 1501.61 | 1502.53 | 5733    | 3   | 363.9  | 46.2 | 2  | R.SSFYPDGGDQETAK.T                                                          |
|                   | Hs293FLP-MG_Ti_102.160   | 2.0577 | 0.285  | 1501.68 | 1502.53 | 5072.4  | 3   | 309.8  | 42.3 | 2  | R.SSFYPDGGDQETAK.T                                                          |
|                   | HsF-IP-293_Ti_102.1268.1 | 3.085  | 0.2893 | 1502.22 | 1502.53 | 2840.5  | 1   | 554.7  | 76.9 | 1  | R.SSFYPDGGDQETAK.T                                                          |
|                   | HsF-IP-293-MG_Ti_102.14  | 2.4381 | 0.266  | 1502.35 | 1502.53 | 5606.8  | 1   | 399.1  | 50   | 2  | R.SSFYPDGGDQETAK.T                                                          |
|                   | HsF-IP-293-MG_Ti_102.14  | 3.0554 | 0.2523 | 1502.37 | 1502.53 | 2747.5  | 1   | 404.6  | 65.4 | 2  | R.SSFYPDGGDQETAK.T                                                          |
|                   | HsHeLa_Control-MG_Ti_10  | 2.3845 | 0.2616 | 1502.55 | 1502.53 | 5796.6  | 1   | 489.2  | 53.8 | 1  | R.SSFYPDGGDQETAK.T                                                          |
|                   | Hs293FLP-MG_Ti_102.161   | 2.7868 | 0.2594 | 1502.6  | 1502.53 | 2467.8  | 1   | 354.4  | 65.4 | 1  | R.SSFYPDGGDQETAK.T                                                          |
|                   | Hs283FLP_Ti_102.1417.14  | 2.6933 | 0.235  | 1502.68 | 1502.53 | 2778.5  | 1   | 458.9  | 69.2 | 2  | R.SSFYPDGGDQETAK.T                                                          |
|                   | HsFLAG-Control_HeLa_NE   | 3.0327 | 0.3137 | 1503    | 1502.53 | 3285.7  | 1   | 495.9  | 69.2 | 4  | R.SSFYPDGGDQETAK.T                                                          |
|                   | Hs293FLP-MG_Ti_202.172   | 3.7527 | 0.499  | 1788.52 | 1788.87 | 5741.7  | 1   | 1215.2 | 71.9 | 1  | R.SSFYPDGGDQETAKTGK.F                                                       |

|                    |                           |        |        |         |         |         |   |        |      |    |                                                                                       |
|--------------------|---------------------------|--------|--------|---------|---------|---------|---|--------|------|----|---------------------------------------------------------------------------------------|
|                    | HsF-IP-293-MG_Ti_106.229  | 5.3436 | 0.3611 | 2245.89 | 2246.31 | 5886.4  | 1 | 1606.5 | 69.4 | 10 | K.GRAEGEWEDQEALDYFSDK.E                                                               |
|                    | Hs293FLP-MG_Ti_105.253    | 4.6412 | 0.468  | 2033.75 | 2033.07 | 7949.2  | 1 | 2032.6 | 75   | 10 | R.AEGEWEDQEALDYFSDK.E                                                                 |
|                    | Hs283FLP_Ti_102.1357.13   | 5.838  | 0.4935 | 1922.53 | 1922.82 | 6981.6  | 1 | 2089.5 | 80   | 22 | K.FNDSEGDDTEETEDYR.Q                                                                  |
| *                  | HsHeLa_Control-MG_Ti_20   | 4.1149 | 0.4    | 1776.87 | 1777.89 | 7495.1  | 1 | 1082.7 | 66.7 | 6  | K.SFATASHRNTEEEGLK.Y                                                                  |
| *                  | HsHeLa_Control-MG_Ti_20   | 4.4539 | 0.3954 | 1708.44 | 1708.95 | 8859.1  | 1 | 1827.5 | 67.9 | 6  | K.LKETGYVVERPSTTK.D                                                                   |
|                    | HsHeLa_Control-MG_Ti_20   | 3.8031 | 0.4708 | 1951.61 | 1952.22 | 7662.2  | 1 | 822.2  | 59.4 | 2  | K.LKETGYVVERPSTTKDK.H                                                                 |
|                    | Hs293FLP_Ti_303.1251.12   | 2.0747 | 0.0942 | 1466.85 | 1467.62 | 2740    | 1 | 222.5  | 54.2 | 1  | K.ETGYVVERPSTTK.D                                                                     |
|                    | HsFLAG-Control_HeLa_NE    | 4.0119 | 0.3318 | 1467.43 | 1467.62 | 7006.1  | 1 | 904.1  | 70.8 | 20 | K.ETGYVVERPSTTK.D                                                                     |
|                    | Hs293FLP-MG_Ti_203.146    | 2.5808 | 0.1428 | 1467.49 | 1467.62 | 3517    | 1 | 306.8  | 58.3 | 2  | K.ETGYVVERPSTTK.D                                                                     |
|                    | Hs293FLP-MG_Ti_303.121    | 3.8984 | 0.3154 | 1467.56 | 1467.62 | 5823    | 1 | 926.4  | 75   | 4  | K.ETGYVVERPSTTK.D                                                                     |
|                    | HsFLAG-Control_293_Ti_20  | 3.0228 | 0.2083 | 1467.57 | 1467.62 | 8359.9  | 1 | 553.9  | 58.3 | 2  | K.ETGYVVERPSTTK.D                                                                     |
|                    | HsHeLa_Control-MG_Ti_20   | 3.6018 | 0.2921 | 1710.03 | 1710.88 | 6504.2  | 1 | 707.8  | 60.7 | 1  | K.ETGYVVERPSTTKDK.H                                                                   |
|                    | HsHeLa_Control-MG_Ti_20   | 3.4975 | 0.2166 | 1573.57 | 1573.83 | 7924.3  | 1 | 1333   | 75   | 2  | K.LKDLFDYSPPLHK.N                                                                     |
|                    | HsFLAG-Control_HeLa_NE    | 2.2798 | 0.1683 | 1332.18 | 1332.5  | 5588.9  | 8 | 369    | 55   | 1  | K.DLFDYSPPLHK.N                                                                       |
|                    | Hs283FLP_Ti_105.1871.18   | 3.4646 | 0.2425 | 1332.32 | 1332.5  | 6364.4  | 2 | 1002   | 75   | 11 | K.DLFDYSPPLHK.N                                                                       |
|                    | HsHeLa_Control_Ti_103.23  | 2.8874 | 0.2104 | 1332.55 | 1332.5  | 5500.6  | 1 | 944.3  | 75   | 2  | K.DLFDYSPPLHK.N                                                                       |
|                    | HsHeLa_Control-MG_Ti_10   | 3.3112 | 0.0852 | 1222.98 | 1222.34 | 6714.1  | 4 | 787.4  | 72.2 | 11 | K.STFREESPLR.I                                                                        |
|                    | HsFlag1P_Ti_106.2169.216  | 4.0871 | 0.3181 | 1369.95 | 1370.57 | 7811    | 1 | 1066   | 72.7 | 10 | K.MIASDSHRPEVK.L                                                                      |
|                    | HsFlag1P_Ti_106.2364.236  | 3.6088 | 0.3892 | 1812.35 | 1813.08 | 5930.8  | 1 | 790.6  | 65.6 | 14 | K.MAPVPLDDSNRPASLTK.D                                                                 |
|                    | Hs283FLP_Ti_106.2095.20   | 3.1316 | 0.2854 | 1439.69 | 1439.7  | 5682.1  | 1 | 896.3  | 75   | 11 | K.DRLLASTLVHSV.K                                                                      |
|                    | HsF-IP-293-MG_Ti_105.169  | 2.4818 | 0.2632 | 1167.54 | 1168.42 | 4506.2  | 1 | 365.5  | 60   | 3  | R.LLASTLVHSV.K                                                                        |
|                    | HsFLAG-Control_HeLa_NE    | 2.5169 | 0.3168 | 1167.62 | 1168.42 | 5843.7  | 1 | 497.1  | 65   | 1  | R.LLASTLVHSV.K                                                                        |
|                    | HsFLAG-Control_MG_293_    | 2.1901 | 0.222  | 1167.65 | 1168.42 | 5958.2  | 9 | 371.3  | 55   | 1  | R.LLASTLVHSV.K                                                                        |
|                    | HsFLAG-Control_HeLa_NE    | 2.68   | 0.2024 | 1167.67 | 1168.42 | 5487.1  | 4 | 425.6  | 60   | 2  | R.LLASTLVHSV.K                                                                        |
|                    | Hs283FLP_Ti_106.2063.20   | 2.3436 | 0.2039 | 1167.67 | 1168.42 | 4435.6  | 3 | 465    | 70   | 2  | R.LLASTLVHSV.K                                                                        |
|                    | HsHeLa_Control-MG_Ti_10   | 2.281  | 0.1774 | 1167.72 | 1168.42 | 4403.9  | 7 | 321    | 55   | 1  | R.LLASTLVHSV.K                                                                        |
|                    | HsF-IP-293-MG_Ti_105.17   | 3.7119 | 0.3023 | 1167.77 | 1168.42 | 5656.8  | 1 | 1443.5 | 90   | 9  | R.LLASTLVHSV.K                                                                        |
|                    | HsFLAG-Control_HeLa_NE    | 3.5225 | 0.2403 | 1168.4  | 1168.42 | 5524    | 1 | 1141.3 | 85   | 2  | R.LLASTLVHSV.K                                                                        |
|                    | HsFLAG-Control_HeLa_NE    | 3.4651 | 0.2726 | 1168.41 | 1168.42 | 5303.9  | 1 | 1092.6 | 85   | 2  | R.LLASTLVHSV.K                                                                        |
|                    | HsHeLa_Control_Ti_106.28  | 3.1839 | 0.2792 | 1168.53 | 1168.42 | 5034.1  | 1 | 1106.1 | 85   | 2  | R.LLASTLVHSV.K                                                                        |
|                    | Hs283FLP_Ti_106.2060.20   | 3.5571 | 0.2799 | 1168.53 | 1168.42 | 5104.5  | 1 | 852    | 75   | 7  | R.LLASTLVHSV.K                                                                        |
|                    | HsHeLa_Control-MG_Ti_10   | 3.4683 | 0.2555 | 1168.55 | 1168.42 | 4937.9  | 1 | 1048.5 | 85   | 8  | R.LLASTLVHSV.K                                                                        |
|                    | HsHeLa_Control_Ti_106.28  | 3.8897 | 0.3442 | 1297.34 | 1296.6  | 7805.9  | 1 | 1502.1 | 77.3 | 1  | R.LLASTLVHSV.K.E                                                                      |
|                    | Hs293FLP_Ti_306.3180.31   | 4.2947 | 0.3775 | 2049.47 | 2049.34 | 9191.7  | 1 | 977.1  | 50   | 3  | K.STSEFIQHIVSLVHHVK.E                                                                 |
|                    | Hs293FLP-MG_Ti_206.326    | 4.6544 | 0.4146 | 2049.64 | 2049.34 | 10764.5 | 1 | 1393.5 | 55.9 | 2  | K.STSEFIQHIVSLVHHVK.E                                                                 |
|                    | Hs293FLP-MG_Ti_206.326    | 3.8436 | 0.3622 | 2049.97 | 2049.34 | 5190.3  | 1 | 983.8  | 44.1 | 1  | K.STSEFIQHIVSLVHHVK.E                                                                 |
|                    | Hs293FLP_Ti_306.3178.31   | 3.9343 | 0.3553 | 2050.54 | 2049.34 | 4792.1  | 1 | 768.2  | 39.7 | 2  | K.STSEFIQHIVSLVHHVK.E                                                                 |
| *                  | HsF-IP-293-MG_Ti_102.129  | 2.982  | 0.1898 | 993.39  | 993.123 | 6805.8  | 3 | 1325.6 | 87.5 | 7  | K.SAAMLNER.F                                                                          |
|                    | Hs293FLP-MG_Ti_205.173    | 3.7302 | 0.2231 | 1158.39 | 1158.34 | 5834    | 1 | 1464.2 | 94.4 | 5  | R.RIDISPSTLR.K                                                                        |
| *                  | HsFlag1P_Ti_105.1870.187  | 3.7664 | 0.3621 | 1805.64 | 1804.95 | 4761.8  | 1 | 687.9  | 69.2 | 3  | K.RPKEEWDPEYTPK.S                                                                     |
|                    | HsF-IP-293_Ti_102.1526.15 | 3.5091 | 0.2765 | 1422.83 | 1423.48 | 4814.6  | 1 | 767.9  | 80   | 7  | K.EEEWDPEYTPK.S                                                                       |
| *                  | Hs293FLP-MG_Ti_205.215    | 3.2776 | 0.3433 | 2143.63 | 2144.31 | 9684.1  | 1 | 704.8  | 50   | 2  | K.KYFLHDDRDDGVYWAK.R                                                                  |
| *                  | Hs283FLP_Ti_106.2196.21   | 4.5978 | 0.4075 | 2015.99 | 2016.13 | 6664.5  | 1 | 1084.4 | 63.3 | 15 | K.YFLHDDRDDGVYWAK.R                                                                   |
|                    | HsHeLa_Control-MG_Ti_10   | 5.7904 | 0.3491 | 2358.89 | 2359.39 | 6813.3  | 1 | 1730.2 | 63.2 | 13 | K.YQGDGIVEDEEETMENNEEK.K                                                              |
|                    | HsF-IP-293-MG_Ti_103.17   | 4.0181 | 0.3086 | 2486.6  | 2487.57 | 9684.8  | 1 | 872.7  | 45   | 8  | K.YQGDGIVEDEEETMENNEEKK.D                                                             |
| gij 40254816 ref N |                           | 38     | 221    | 0.35    | 732     | 84674   | 5 | U      |      |    | heat shock protein 90kDa alpha (cytosolic), class A member 1 isoform 2 [Homo sapiens] |
|                    | HsFLAG-Control_HeLa_S10   | 2.4492 | 0.1648 | 1291.51 | 1292.39 | 4628.6  | 1 | 302.8  | 59.1 | 1  | R.ELISNSSDALDK.I                                                                      |
|                    | HsFLAG-Control_HeLa_S10   | 3.2785 | 0.2502 | 1292.15 | 1292.39 | 6546.2  | 1 | 726.9  | 68.2 | 10 | R.ELISNSSDALDK.I                                                                      |
|                    | HsFLAG-Control_HeLa_S10   | 3.3867 | 0.2554 | 1292.42 | 1292.39 | 5189    | 5 | 656.4  | 68.2 | 3  | R.ELISNSSDALDK.I                                                                      |

|                    |                          |        |        |         |         |         |     |        |      |    |                                                                                           |
|--------------------|--------------------------|--------|--------|---------|---------|---------|-----|--------|------|----|-------------------------------------------------------------------------------------------|
| *                  | HsFLAG-Control_HeLa_S1(  | 3.2975 | 0.1427 | 1192.37 | 1191.42 | 7693.8  | 3   | 1304.4 | 88.9 | 6  | K.ELHINLIPNK.Q                                                                            |
|                    | HsFLAG-Control_HeLa_S1(  | 3.4575 | 0.2103 | 1591.54 | 1590.82 | 5913.8  | 2   | 662.3  | 62.5 | 2  | K.ELHINLIPNKQDR.T                                                                         |
|                    | HsFLAG-Control_HeLa_NE   | 4.4034 | 0.1007 | 1243.05 | 1243.45 | 5205.6  | 1   | 1215   | 86.4 | 20 | K.ADLINNLGTIAK.S                                                                          |
|                    | HsFLAG-Control_HeLa_S1(  | 5.634  | 0.452  | 2257.72 | 2257.29 | 8942.2  | 1   | 2330.1 | 65.8 | 16 | K.HNDDEQYAWESSAGGSFTVR.T                                                                  |
|                    | HsFLAG-Control_HeLa_S1(  | 3.3042 | 0.2832 | 1312.18 | 1312.33 | 6777.7  | 1   | 777.6  | 77.8 | 15 | K.EDQTEYLEER.R                                                                            |
|                    | HsFLAG-Control_HeLa_S1(  | 3.9401 | 0.3021 | 1779.66 | 1780.08 | 5732.9  | 1   | 1407.9 | 51.8 | 1  | K.HSQFIGYPITLFVEK.E                                                                       |
|                    | HsFLAG-Control_HeLa_S1(  | 4.6022 | 0.3566 | 1780.14 | 1780.08 | 7627    | 1   | 1659.1 | 75   | 6  | K.HSQFIGYPITLFVEK.E                                                                       |
|                    | HsFLAG-Control_HeLa_S1(  | 5.013  | 0.4458 | 1780.42 | 1780.08 | 6666.5  | 1   | 1717.5 | 82.1 | 8  | K.HSQFIGYPITLFVEK.E                                                                       |
|                    | HsFLAG-Control_HeLa_S1(  | 3.5901 | 0.1509 | 1151.58 | 1152.25 | 8718.8  | 6   | 968.9  | 75   | 4  | K.YIDQEELNK.T                                                                             |
|                    | HsFLAG-Control_HeLa_S1(  | 5.4991 | 0.3687 | 1834.65 | 1834.89 | 6758.2  | 1   | 2036.9 | 85.7 | 32 | R.NPDDITNEEYGEFYK.S                                                                       |
|                    | HsFLAG-Control_HeLa_NE   | 4.7198 | 0.3685 | 1528.53 | 1528.66 | 7778.9  | 1   | 1591.3 | 79.2 | 15 | K.SLTNDWEDHLAVK.H                                                                         |
|                    | HsFLAG-Control_HeLa_S1(  | 3.1275 | 0.2534 | 1349.94 | 1349.49 | 5003.1  | 1   | 677    | 75   | 4  | K.HFSVEGQLEFR.A                                                                           |
|                    | HsFLAG-Control_HeLa_NE   | 3.7466 | 0.2381 | 1264.71 | 1265.41 | 6070.2  | 1   | 1041.7 | 83.3 | 10 | R.RAPFDLFENR.K                                                                            |
|                    | HsFLAG-Control_HeLa_NE   | 2.4384 | 0.1143 | 948.48  | 949.051 | 8413.3  | 8   | 681.8  | 75   | 1  | K.FYEQFSK.N                                                                               |
|                    | HsFLAG-Control_HeLa_S1(  | 2.5696 | 0.1448 | 1168.59 | 1169.24 | 5147.3  | 2   | 436.5  | 66.7 | 3  | K.LGIHEDSQNR.K                                                                            |
|                    | HsFLAG-Control_HeLa_NE   | 2.8368 | 0.2315 | 1169.2  | 1169.24 | 6356.4  | 7   | 602.8  | 66.7 | 3  | K.LGIHEDSQNR.K                                                                            |
|                    | HsFLAG-Control_HeLa_S1(  | 2.8613 | 0.2441 | 1169.35 | 1169.24 | 6648.7  | 1   | 820.8  | 72.2 | 5  | K.LGIHEDSQNR.K                                                                            |
|                    | HsFLAG-Control_HeLa_NE   | 2.6665 | 0.1841 | 1297.57 | 1297.41 | 8151.2  | 1   | 940.5  | 70   | 1  | K.LGIHEDSQNRK.K                                                                           |
|                    | HsFLAG-Control_HeLa_S1(  | 3.73   | 0.4072 | 1551.39 | 1551.71 | 7872.1  | 1   | 1334.4 | 73.1 | 1  | R.YYTSASGDEMVSJK.D                                                                        |
|                    | HsFLAG-Control_HeLa_NE   | 3.403  | 0.3361 | 1224.51 | 1225.39 | 6426    | 2   | 721.8  | 66.7 | 5  | K.HIYYITGETK.D                                                                            |
|                    | HsFLAG-Control_HeLa_S1(  | 3.2831 | 0.3573 | 1224.53 | 1225.39 | 6930.1  | 1   | 843.9  | 72.2 | 6  | K.HIYYITGETK.D                                                                            |
|                    | Hs283FLP_Ti_105.1393.13  | 3.1232 | 0.3785 | 1224.58 | 1225.39 | 5786.9  | 1   | 754.6  | 72.2 | 2  | K.HIYYITGETK.D                                                                            |
|                    | HsFLAG-Control_HeLa_S1(  | 3.2689 | 0.4124 | 1224.59 | 1225.39 | 6192.5  | 1   | 931.4  | 77.8 | 1  | K.HIYYITGETK.D                                                                            |
|                    | HsFLAG-Control_HeLa_S1(  | 3.3338 | 0.3832 | 1224.82 | 1225.39 | 3650.2  | 1   | 668.6  | 77.8 | 1  | K.HIYYITGETK.D                                                                            |
|                    | HsFLAG-Control_HeLa_NE   | 3.3596 | 0.3489 | 1225.24 | 1225.39 | 3715.7  | 1   | 927.2  | 88.9 | 4  | K.HIYYITGETK.D                                                                            |
|                    | HsFLAG-Control_HeLa_S1(  | 3.247  | 0.3207 | 1225.56 | 1225.39 | 3672.2  | 1   | 869.1  | 88.9 | 1  | K.HIYYITGETK.D                                                                            |
|                    | HsFLAG-Control_HeLa_S1(  | 3.7466 | 0.3254 | 1236.22 | 1236.33 | 7080.7  | 2   | 1140   | 80   | 13 | K.DQVANSASFVER.L                                                                          |
|                    | HsFLAG-Control_HeLa_S1(  | 2.5834 | 0.3358 | 1416.47 | 1417.47 | 3338.4  | 1   | 318    | 63.6 | 2  | K.EGLELPEDEEEK.K                                                                          |
|                    | HsFLAG-Control_HeLa_NE   | 2.8612 | 0.171  | 1417.26 | 1417.47 | 2994.8  | 7   | 388    | 68.2 | 6  | K.EGLELPEDEEEK.K                                                                          |
|                    | HsFLAG-MOCK_300mM_T      | 2.8099 | 0.2341 | 1167.72 | 1168.35 | 4413.6  | 1   | 487.2  | 75   | 2  | K.KTKFENLCK.I                                                                             |
|                    | HsFLAG-MOCK_300mM_T      | 2.911  | 0.2179 | 1168.94 | 1168.35 | 5882.8  | 1   | 1050.9 | 87.5 | 2  | K.KTKFENLCK.I                                                                             |
|                    | HsFLAG-Control_HeLa_S1(  | 4.3051 | 0.3302 | 1787.57 | 1788.01 | 9266.6  | 1   | 2131.5 | 51.8 | 1  | K.HLEINPDHSIETLR.Q                                                                        |
|                    | HsFLAG-Control_HeLa_NE   | 4.5439 | 0.4176 | 1789.92 | 1788.01 | 6445.5  | 1   | 1222.4 | 71.4 | 4  | K.HLEINPDHSIETLR.Q                                                                        |
|                    | HsFLAG-Control_HeLa_S1(  | 4.5087 | 0.3244 | 3003.82 | 3004.37 | 8897.8  | 1   | 1496.7 | 30.8 | 3  | K.DLVILLYETALLSSGFSLEDQPQTHANR.I                                                          |
|                    | HsFLAG-Control_HeLa_S1(  | 4.0636 | 0.3203 | 3004.79 | 3004.37 | 7082.1  | 1   | 715.8  | 38.5 | 1  | K.DLVILLYETALLSSGFSLEDQPQTHANR.I                                                          |
| gij 5803225 ref NF |                          | 10     | 33     | 0.349   | 255     | 29174   | 4.7 | U      |      |    | tyrosine 3/tryptophan 5 -monooxygenase activation protein, epsilon polypeptide [Homo sa   |
| *                  | HsFLAG-MOCK_300mM_T      | 2.5416 | 0.2887 | 1237.59 | 1238.39 | 4153.5  | 2   | 394.9  | 54.5 | 1  | K.HLIPAANTGESK.V                                                                          |
| *                  | HsHeLa3_Ti_106.1935.193  | 3.206  | 0.3518 | 1237.6  | 1238.39 | 4525.7  | 1   | 806.4  | 77.3 | 2  | K.HLIPAANTGESK.V                                                                          |
| *                  | HsFLAG-Control_293_Ti_2( | 3.1003 | 0.2777 | 1238.19 | 1238.39 | 3501.1  | 1   | 875.5  | 81.8 | 6  | K.HLIPAANTGESK.V                                                                          |
| *                  | HsFLAG-Control_HeLa_NE   | 2.9473 | 0.196  | 1238.35 | 1238.39 | 3739.8  | 1   | 960.2  | 81.8 | 3  | K.HLIPAANTGESK.V                                                                          |
| *                  | HsHeLa3_Ti_102.1598.159  | 2.6098 | 0.2372 | 1194.68 | 1195.32 | 3865.9  | 1   | 301.8  | 65   | 2  | K.EAENSLVAYK.A                                                                            |
| *                  | HsHeLa3_Ti_105.1866.186  | 3.4293 | 0.3151 | 1822.34 | 1821.1  | 4207.1  | 1   | 658.5  | 62.5 | 2  | K.AASDIAMTELPPHTPIR.L                                                                     |
| *                  | HsFLAG-Control_HeLa_S1(  | 5.0871 | 0.4949 | 2088.4  | 2089.22 | 6566.8  | 1   | 2164.1 | 75   | 13 | K.AAFDDAIAELDTLSEESYK.D                                                                   |
|                    | HsHeLa3_Ti_102.2409.240  | 5.4964 | 0.4395 | 2181.77 | 2182.28 | 6994.4  | 1   | 1369.3 | 63.9 | 2  | R.DNLTWTSMDMQGDGEEQNK.E                                                                   |
| *                  | HsFLAG-Control_293_Ti_2( | 2.3856 | 0.1179 | 1289.26 | 1290.28 | 10240.8 | 9   | 771.2  | 60   | 1  | K.EALQDVEDENQ.-                                                                           |
| *                  | Hs293FLP_TREX_Ti_101.0   | 2.8756 | 0.2038 | 1289.99 | 1290.28 | 5483.3  | 2   | 701    | 70   | 1  | K.EALQDVEDENQ.-                                                                           |
| gij 89061489 ref x |                          | 68     | 315    | 0.345   | 869     | 100139  | 9.9 | U      |      |    | PREDICTED: similar to Bcl-2-associated transcription factor 1 (Btf) isoform 1 [Homo sapie |
|                    | Hs293FLP-MG_Ti_103.116   | 4.2686 | 0.2971 | 1442.85 | 1442.57 | 4496.5  | 2   | 911.5  | 75   | 9  | K.KAEGEPQEE SPLK.S                                                                        |
|                    | HsF-IP-293-MG_Ti_105.15  | 4.2602 | 0.2754 | 2608.4  | 2609.68 | 4613.8  | 1   | 427    | 42.9 | 3  | K.SQEEP KDTFEHDPSESIDEFNK.S                                                               |

|                          |        |        |         |         |        |   |        |      |    |                            |
|--------------------------|--------|--------|---------|---------|--------|---|--------|------|----|----------------------------|
| Hs293FLP-MG_Ti_306.237   | 3.692  | 0.4131 | 2608.41 | 2609.68 | 4254.9 | 1 | 519.8  | 47.6 | 1  | K.SQEEPKDTFEHDPSESIDEFNK.S |
| Hs293FLP-MG_Ti_203.190   | 4.7394 | 0.2621 | 2608.75 | 2609.68 | 7028.8 | 1 | 1057.3 | 36.9 | 1  | K.SQEEPKDTFEHDPSESIDEFNK.S |
| Hs293FLP-MG_Ti_203.190   | 4.0194 | 0.4754 | 2608.86 | 2609.68 | 4719.7 | 1 | 683.3  | 52.4 | 2  | K.SQEEPKDTFEHDPSESIDEFNK.S |
| Hs283FLP_Ti_105.1581.15  | 4.0195 | 0.3453 | 2608.88 | 2609.68 | 4522.5 | 1 | 351.3  | 40.5 | 5  | K.SQEEPKDTFEHDPSESIDEFNK.S |
| HsFLAG-Control_HeLa_NE   | 3.8143 | 0.3422 | 2608.92 | 2609.68 | 5472.9 | 1 | 396.8  | 40.5 | 1  | K.SQEEPKDTFEHDPSESIDEFNK.S |
| HsF-IP-293-MG_Ti_105.18  | 4.8778 | 0.3121 | 2609.15 | 2609.68 | 5020.4 | 1 | 769.3  | 35.7 | 5  | K.SQEEPKDTFEHDPSESIDEFNK.S |
| HsHeLa_Control_Ti_103.20 | 3.6894 | 0.2965 | 2609.65 | 2609.68 | 4258.9 | 1 | 715.4  | 39.3 | 1  | K.SQEEPKDTFEHDPSESIDEFNK.S |
| HsFLAG-Control_HeLa_NE   | 4.4793 | 0.2928 | 2609.78 | 2609.68 | 5503.5 | 1 | 994.4  | 39.3 | 2  | K.SQEEPKDTFEHDPSESIDEFNK.S |
| Hs283FLP_Ti_104.2388.23  | 4.4679 | 0.2976 | 2609.93 | 2609.68 | 4879.3 | 1 | 929.9  | 39.3 | 4  | K.SQEEPKDTFEHDPSESIDEFNK.S |
| Hs293FLP-MG_Ti_105.200   | 3.5827 | 0.2809 | 2610.54 | 2609.68 | 4295.5 | 1 | 410.6  | 42.9 | 4  | K.SQEEPKDTFEHDPSESIDEFNK.S |
| Hs293FLP-MG_Ti_105.200   | 3.8551 | 0.2815 | 2611.6  | 2609.68 | 4440.2 | 1 | 544.1  | 34.5 | 1  | K.SQEEPKDTFEHDPSESIDEFNK.S |
| HsHeLa_Control_Ti_103.21 | 3.6537 | 0.3622 | 2612.16 | 2609.68 | 4472.1 | 1 | 539.3  | 47.6 | 4  | K.SQEEPKDTFEHDPSESIDEFNK.S |
| HsFLAG-Control_HeLa_NE   | 5.0441 | 0.3677 | 1910.23 | 1910.95 | 5038.6 | 1 | 1211.9 | 73.3 | 5  | K.DTFEHDPSSEIDEFNK.S       |
| Hs293FLP-MG_Ti_202.289   | 4.8623 | 0.4437 | 2081.58 | 2082.19 | 4344.8 | 1 | 1036   | 63.2 | 16 | K.SSATSGDIWPGLSAYDNSPR.S   |
| HsHeLa_Control-MG_Ti_20  | 3.6063 | 0.4059 | 1843.57 | 1842.93 | 6122.5 | 1 | 906.8  | 63.3 | 2  | K.NTPSQSHSHIQHSPER.S       |
| Hs293FLP_Ti_306.2264.22  | 3.4083 | 0.2608 | 1721.99 | 1720.89 | 6373.3 | 1 | 727.9  | 57.1 | 4  | R.YSPSQNSPIHHIPSR.R        |
| Hs283FLP_Ti_102.1419.14  | 2.3846 | 0.4217 | 1501.45 | 1502.53 | 6003.2 | 1 | 511.6  | 53.8 | 1  | R.SSFYPDGGDQETAK.T         |
| HsHeLa_Control_Ti_102.14 | 2.3205 | 0.185  | 1501.61 | 1502.53 | 5733   | 3 | 363.9  | 46.2 | 2  | R.SSFYPDGGDQETAK.T         |
| Hs293FLP-MG_Ti_102.160   | 2.0577 | 0.285  | 1501.68 | 1502.53 | 5072.4 | 3 | 309.8  | 42.3 | 2  | R.SSFYPDGGDQETAK.T         |
| HsF-IP-293_Ti_102.1268.1 | 3.085  | 0.2893 | 1502.22 | 1502.53 | 2840.5 | 1 | 554.7  | 76.9 | 1  | R.SSFYPDGGDQETAK.T         |
| HsF-IP-293-MG_Ti_102.14  | 2.4381 | 0.266  | 1502.35 | 1502.53 | 5606.8 | 1 | 399.1  | 50   | 2  | R.SSFYPDGGDQETAK.T         |
| HsF-IP-293-MG_Ti_102.14  | 3.0554 | 0.2523 | 1502.37 | 1502.53 | 2747.5 | 1 | 404.6  | 65.4 | 2  | R.SSFYPDGGDQETAK.T         |
| HsHeLa_Control-MG_Ti_10  | 2.3845 | 0.2616 | 1502.55 | 1502.53 | 5796.6 | 1 | 489.2  | 53.8 | 1  | R.SSFYPDGGDQETAK.T         |
| Hs293FLP-MG_Ti_102.161   | 2.7868 | 0.2594 | 1502.6  | 1502.53 | 2467.8 | 1 | 354.4  | 65.4 | 1  | R.SSFYPDGGDQETAK.T         |
| Hs283FLP_Ti_102.1417.14  | 2.6933 | 0.235  | 1502.68 | 1502.53 | 2778.5 | 1 | 458.9  | 69.2 | 2  | R.SSFYPDGGDQETAK.T         |
| HsFLAG-Control_HeLa_NE   | 3.0327 | 0.3137 | 1503    | 1502.53 | 3285.7 | 1 | 495.9  | 69.2 | 4  | R.SSFYPDGGDQETAK.T         |
| Hs293FLP-MG_Ti_202.172   | 3.7527 | 0.499  | 1788.52 | 1788.87 | 5741.7 | 1 | 1215.2 | 71.9 | 1  | R.SSFYPDGGDQETAKTKG.F      |
| HsF-IP-293-MG_Ti_106.22  | 5.3436 | 0.3611 | 2245.89 | 2246.31 | 5886.4 | 1 | 1606.5 | 69.4 | 10 | K.GRAEGEWEDQEALDYFSDK.E    |
| Hs293FLP-MG_Ti_105.253   | 4.6412 | 0.468  | 2033.75 | 2033.07 | 7949.2 | 1 | 2032.6 | 75   | 10 | R.AEGEWEDQEALDYFSDK.E      |
| Hs283FLP_Ti_102.1357.13  | 5.838  | 0.4935 | 1922.53 | 1922.82 | 6981.6 | 1 | 2089.5 | 80   | 22 | K.FNDSEGGDTEETEDYR.K       |
| HsHeLa_Control-MG_Ti_20  | 4.1149 | 0.4    | 1776.87 | 1777.89 | 7495.1 | 1 | 1082.7 | 66.7 | 6  | K.SFATASHRNTEEEGLK.Y       |
| Hs293FLP_Ti_303.1251.12  | 2.0747 | 0.0942 | 1466.85 | 1467.62 | 2740   | 1 | 222.5  | 54.2 | 1  | K.ETGYVVERPSTTK.D          |
| HsFLAG-Control_HeLa_NE   | 4.0119 | 0.3318 | 1467.43 | 1467.62 | 7006.1 | 1 | 904.1  | 70.8 | 20 | K.ETGYVVERPSTTK.D          |
| Hs293FLP-MG_Ti_203.146   | 2.5808 | 0.1428 | 1467.49 | 1467.62 | 3517   | 1 | 306.8  | 58.3 | 2  | K.ETGYVVERPSTTK.D          |
| Hs293FLP-MG_Ti_303.121   | 3.8984 | 0.3154 | 1467.56 | 1467.62 | 5823   | 1 | 926.4  | 75   | 4  | K.ETGYVVERPSTTK.D          |
| HsFLAG-Control_293_Ti_20 | 3.0228 | 0.2083 | 1467.57 | 1467.62 | 8359.9 | 1 | 553.9  | 58.3 | 2  | K.ETGYVVERPSTTK.D          |
| HsHeLa_Control-MG_Ti_20  | 3.6018 | 0.2921 | 1710.03 | 1710.88 | 6504.2 | 1 | 707.8  | 60.7 | 1  | K.ETGYVVERPSTTKDK.H        |
| HsHeLa_Control-MG_Ti_20  | 3.4975 | 0.2166 | 1573.57 | 1573.83 | 7924.3 | 1 | 1333   | 75   | 2  | K.LKDLFDYSPPLHK.N          |
| HsFLAG-Control_HeLa_NE   | 2.2798 | 0.1683 | 1332.18 | 1332.5  | 5588.9 | 8 | 369    | 55   | 1  | K.DLFDYSPPLHK.N            |
| Hs283FLP_Ti_105.1871.18  | 3.4646 | 0.2425 | 1332.32 | 1332.5  | 6364.4 | 2 | 1002   | 75   | 11 | K.DLFDYSPPLHK.N            |
| HsHeLa_Control_Ti_103.23 | 2.8874 | 0.2104 | 1332.55 | 1332.5  | 5500.6 | 1 | 944.3  | 75   | 2  | K.DLFDYSPPLHK.N            |
| HsHeLa_Control-MG_Ti_10  | 3.3112 | 0.0852 | 1222.98 | 1222.34 | 6714.1 | 4 | 787.4  | 72.2 | 11 | K.STFREESPLR.I             |
| HsFlag1P_Ti_106.2169.216 | 4.0871 | 0.3181 | 1369.95 | 1370.57 | 7811   | 1 | 1066   | 72.7 | 10 | K.MIASDSHRPEVK.L           |
| HsFlag1P_Ti_106.2364.236 | 3.6088 | 0.3892 | 1812.35 | 1813.08 | 5930.8 | 1 | 790.6  | 65.6 | 14 | K.MAPVPLDDSNRPASLTK.D      |
| Hs283FLP_Ti_106.2095.20  | 3.1316 | 0.2854 | 1439.69 | 1439.7  | 5682.1 | 1 | 896.3  | 75   | 11 | K.DRLLASTLVHSV.K           |
| HsF-IP-293-MG_Ti_105.16  | 2.4818 | 0.2632 | 1167.54 | 1168.42 | 4506.2 | 1 | 365.5  | 60   | 3  | R.LLASTLVHSV.K             |
| HsFLAG-Control_HeLa_NE   | 2.5169 | 0.3168 | 1167.62 | 1168.42 | 5843.7 | 1 | 497.1  | 65   | 1  | R.LLASTLVHSV.K             |
| HsFLAG-Control_MG_293_   | 2.1901 | 0.222  | 1167.65 | 1168.42 | 5958.2 | 9 | 371.3  | 55   | 1  | R.LLASTLVHSV.K             |
| HsFLAG-Control_HeLa_NE   | 2.68   | 0.2024 | 1167.67 | 1168.42 | 5487.1 | 4 | 425.6  | 60   | 2  | R.LLASTLVHSV.K             |

|                    |                          |        |        |         |         |         |   |        |      |    |                                                                       |
|--------------------|--------------------------|--------|--------|---------|---------|---------|---|--------|------|----|-----------------------------------------------------------------------|
|                    | Hs283FLP_Ti_106.2063.20  | 2.3436 | 0.2039 | 1167.67 | 1168.42 | 4435.6  | 3 | 465    | 70   | 2  | R.LLASTLVHSVK.K                                                       |
|                    | HsHeLa_Control-MG_Ti_10  | 2.281  | 0.1774 | 1167.72 | 1168.42 | 4403.9  | 7 | 321    | 55   | 1  | R.LLASTLVHSVK.K                                                       |
|                    | HsF-IP-293-MG_Ti_105.17  | 3.7119 | 0.3023 | 1167.77 | 1168.42 | 5656.8  | 1 | 1443.5 | 90   | 9  | R.LLASTLVHSVK.K                                                       |
|                    | HsFLAG-Control_HeLa_NE   | 3.5225 | 0.2403 | 1168.4  | 1168.42 | 5524    | 1 | 1141.3 | 85   | 2  | R.LLASTLVHSVK.K                                                       |
|                    | HsFLAG-Control_HeLa_NE   | 3.4651 | 0.2726 | 1168.41 | 1168.42 | 5303.9  | 1 | 1092.6 | 85   | 2  | R.LLASTLVHSVK.K                                                       |
|                    | HsHeLa_Control_Ti_106.28 | 3.1839 | 0.2792 | 1168.53 | 1168.42 | 5034.1  | 1 | 1106.1 | 85   | 2  | R.LLASTLVHSVK.K                                                       |
|                    | Hs283FLP_Ti_106.2060.20  | 3.5571 | 0.2799 | 1168.53 | 1168.42 | 5104.5  | 1 | 852    | 75   | 7  | R.LLASTLVHSVK.K                                                       |
|                    | HsHeLa_Control-MG_Ti_10  | 3.4683 | 0.2555 | 1168.55 | 1168.42 | 4937.9  | 1 | 1048.5 | 85   | 8  | R.LLASTLVHSVK.K                                                       |
|                    | HsHeLa_Control_Ti_106.28 | 3.8897 | 0.3442 | 1297.34 | 1296.6  | 7805.9  | 1 | 1502.1 | 77.3 | 1  | R.LLASTLVHSVK.K.E                                                     |
|                    | Hs293FLP_Ti_306.3180.31  | 4.2947 | 0.3775 | 2049.47 | 2049.34 | 9191.7  | 1 | 977.1  | 50   | 3  | K.STSEFIQHIVSLVHHVK.E                                                 |
|                    | Hs293FLP-MG_Ti_206.326   | 4.6544 | 0.4146 | 2049.64 | 2049.34 | 10764.5 | 1 | 1393.5 | 55.9 | 2  | K.STSEFIQHIVSLVHHVK.E                                                 |
|                    | Hs293FLP-MG_Ti_206.326   | 3.8436 | 0.3622 | 2049.97 | 2049.34 | 5190.3  | 1 | 983.8  | 44.1 | 1  | K.STSEFIQHIVSLVHHVK.E                                                 |
|                    | Hs293FLP_Ti_306.3178.31  | 3.9343 | 0.3553 | 2050.54 | 2049.34 | 4792.1  | 1 | 768.2  | 39.7 | 2  | K.STSEFIQHIVSLVHHVK.E                                                 |
|                    | Hs293FLP-MG_Ti_205.173   | 3.7302 | 0.2231 | 1158.39 | 1158.34 | 5834    | 1 | 1464.2 | 94.4 | 5  | R.RIDISPSTLR.K                                                        |
|                    | HsHeLa_Control-MG_Ti_20  | 4.2638 | 0.3814 | 1897.7  | 1897.96 | 7641.9  | 1 | 1155.2 | 63.3 | 11 | R.GTFHDDRDDGVDYWAK.R                                                  |
|                    | HsHeLa_Control-MG_Ti_10  | 5.7904 | 0.3491 | 2358.89 | 2359.39 | 6813.3  | 1 | 1730.2 | 63.2 | 13 | K.YQGDGIVEDEEETMENNEEK.K                                              |
|                    | HsF-IP-293-MG_Ti_103.17  | 4.0181 | 0.3086 | 2486.6  | 2487.57 | 9684.8  | 1 | 872.7  | 45   | 8  | K.YQGDGIVEDEEETMENNEEKK.D                                             |
| gij 4503529 ref NF |                          | 9      | 0.345  | 406     | 46154   | 5.5 U   |   |        |      |    | eukaryotic translation initiation factor 4A, isoform 1 [Homo sapiens] |
|                    | HsFLAG-Control_HeLa_NE   | 4.3475 | 0.477  | 1828.66 | 1829.07 | 5470.9  | 1 | 956.4  | 66.7 | 13 | R.GIYAYGFEEKPSAIQQR.A                                                 |
|                    | HsFLAG-Control_HeLa_NE   | 4.8509 | 0.4125 | 1396.71 | 1395.51 | 5929.6  | 1 | 1620.3 | 84.6 | 3  | K.GYDVIAQAQSGTGK.T                                                    |
| *                  | HsFLAG-Control_HeLa_S1   | 5.1355 | 0.3741 | 1905.93 | 1905.24 | 8122.7  | 1 | 1580.9 | 65.6 | 7  | K.TATFAISILQQIELDLK.A                                                 |
|                    | HsFLAG-Control_HeLa_NE   | 3.5644 | 0.2417 | 1142.43 | 1141.36 | 5618.9  | 1 | 1590.1 | 85   | 7  | K.ATQALVLAPTR.E                                                       |
|                    | HsFLAG-Control_HeLa_NE   | 2.9952 | 0.1609 | 1170.29 | 1170.31 | 4761    | 2 | 738.5  | 81.2 | 3  | K.DQIYDIFQK.L                                                         |
| *                  | HsHeLa3_Ti_103.3368.336  | 2.6614 | 0.214  | 2460.08 | 2460.85 | 7317.9  | 6 | 368.6  | 31.8 | 1  | K.LNSNTQVVLLSATMPSDVLEVTK.K                                           |
|                    | HsFLAG-Control_HeLa_NE   | 3.3775 | 0.2405 | 1115.66 | 1115.36 | 4998.5  | 2 | 1015   | 88.9 | 15 | R.VLITDILLAR.G                                                        |
|                    | HsFLAG-Control_HeLa_S1   | 5.2214 | 0.4321 | 2146.44 | 2145.42 | 9669.9  | 1 | 1812.5 | 61.1 | 22 | R.GIDVQQVSLVINYLPTNR.E                                                |
| *                  | HsFLAG-Control_HeLa_S1   | 3.6339 | 0.3506 | 2427.95 | 2428.71 | 6410.6  | 3 | 425.2  | 40   | 1  | R.DIETFYNTSIEEMPLNVADLI.-                                             |
| gij 13514813 ref N |                          | 26     | 0.344  | 662     | 73272   | 7.2 U   |   |        |      |    | DEAD/H (Asp-Glu-Ala-Asp/His) box polypeptide 3 [Homo sapiens]         |
| gij 13514817 ref N |                          | 26     | 0.344  | 662     | 73272   | 7.2 U   |   |        |      |    | DEAD/H (Asp-Glu-Ala-Asp/His) box polypeptide 3 [Homo sapiens]         |
|                    | HsGST-MOCK_Ti_102.272    | 4.8053 | 0.4074 | 3624.15 | 3623.87 | 6156.7  | 1 | 783.2  | 27.4 | 2  | K.SDEDDWSKPLPPSERLEQELFSGGNTGINFEK.Y                                  |
|                    | HsFLAG-Control_HeLa_S1   | 5.3353 | 0.4903 | 1883.37 | 1884.05 | 7684.1  | 1 | 1935.1 | 75   | 3  | R.LEQELFSGGNTGINFEK.Y                                                 |
|                    | HsGST-MOCK_Ti_405.487    | 6.0723 | 0.4615 | 2332.19 | 2333.69 | 9106.9  | 1 | 2019.5 | 41.7 | 1  | K.TAAFLLPILSQIYSDGPGALR.A                                             |
|                    | HsHeLa_Control-MG_Ti_20  | 5.4106 | 0.447  | 2332.6  | 2333.69 | 8756.4  | 1 | 2295.4 | 44   | 2  | K.TAAFLLPILSQIYSDGPGALR.A                                             |
|                    | HsGST-MOCK_Ti_304.481    | 6.1656 | 0.4572 | 2332.76 | 2333.69 | 6759.1  | 1 | 1721.7 | 64.3 | 11 | K.TAAFLLPILSQIYSDGPGALR.A                                             |
|                    | HsFLAG-Control_HeLa_NE   | 5.8579 | 0.4604 | 2333.32 | 2333.69 | 8356.7  | 1 | 2154.7 | 44   | 2  | K.TAAFLLPILSQIYSDGPGALR.A                                             |
|                    | HsHeLa_Control-MG_Ti_20  | 5.3027 | 0.4394 | 2333.53 | 2333.69 | 8010.1  | 1 | 1560.5 | 57.1 | 4  | K.TAAFLLPILSQIYSDGPGALR.A                                             |
|                    | HsHeLa3_Ti_104.4623.462  | 4.6618 | 0.3988 | 2333.76 | 2333.69 | 7437.9  | 1 | 1356.7 | 39.3 | 1  | K.TAAFLLPILSQIYSDGPGALR.A                                             |
|                    | HsFLAG-Control_HeLa_NE   | 5.3776 | 0.3583 | 2333.94 | 2333.69 | 5423.6  | 1 | 1068.7 | 57.1 | 6  | K.TAAFLLPILSQIYSDGPGALR.A                                             |
|                    | HsHeLa3_Ti_105.4551.455  | 4.8978 | 0.4303 | 2334.59 | 2333.69 | 6231.3  | 1 | 1310.8 | 57.1 | 3  | K.TAAFLLPILSQIYSDGPGALR.A                                             |
|                    | HsGST-MOCK_Ti_305.288    | 3.3787 | 0.181  | 1358.41 | 1358.62 | 6011.2  | 5 | 809.5  | 72.7 | 5  | K.QYPISLVAPTR.E                                                       |
|                    | HsGST-MOCK_Ti_102.159    | 4.31   | 0.3866 | 1889.78 | 1889.13 | 3983.7  | 1 | 931.3  | 65.6 | 5  | R.VRPCVVYGGADIGQQIR.D                                                 |
|                    | HsGST-MOCK_Ti_102.143    | 3.4108 | 0.2907 | 1181.52 | 1181.35 | 6575.9  | 2 | 1213   | 85   | 2  | R.GCHLLVATPGR.L                                                       |
|                    | HsGST-MOCK_Ti_303.267    | 3.1278 | 0.2572 | 1337.33 | 1337.6  | 5377.8  | 1 | 865.1  | 80   | 2  | R.MLDMGFEPQIR.R                                                       |
|                    | HsHeLa_Control_Ti_103.42 | 4.0259 | 0.2653 | 1560.87 | 1558.77 | 7756.3  | 1 | 1819.1 | 83.3 | 2  | R.DFLDEYIFLAVGR.V                                                     |
|                    | HsFLAG-Control_HeLa_S1   | 2.5499 | 0.1769 | 1163.05 | 1164.26 | 9379.1  | 1 | 1254.5 | 75   | 1  | R.VGSTSENITQK.V                                                       |
|                    | HsHeLa_Control_Ti_106.37 | 4.5524 | 0.2611 | 1448.71 | 1448.71 | 5559.7  | 1 | 1429.6 | 83.3 | 3  | K.RSFLDLLLNATGK.D                                                     |
|                    | HsGST-MOCK_Ti_102.271    | 4.4398 | 0.1874 | 1449.05 | 1448.71 | 5808.4  | 4 | 1760   | 58.3 | 2  | K.RSFLDLLLNATGK.D                                                     |
|                    | HsHeLa_Control_Ti_103.37 | 4.62   | 0.3021 | 1293.29 | 1292.52 | 7028    | 1 | 1921.9 | 86.4 | 4  | R.SFLDLLLNATGK.D                                                      |
|                    | HsGST-MOCK_Ti_102.226    | 3.6    | 0.2792 | 2614.27 | 2614.71 | 7170.3  | 1 | 1056.5 | 35.2 | 1  | K.GADSLEDFLYHEGYACTSIHGDR.S                                           |

|                    |                           |        |        |         |         |         |     |        |      |    |                                                                    |
|--------------------|---------------------------|--------|--------|---------|---------|---------|-----|--------|------|----|--------------------------------------------------------------------|
|                    | HsGST-MOCK_Ti_103.134i    | 3.4856 | 0.286  | 1301.78 | 1301.4  | 4049.4  | 1   | 491.1  | 77.8 | 3  | R.DREEALHQFR.S                                                     |
|                    | HsGST-MOCK_Ti_405.217i    | 4.4769 | 0.4241 | 1169.52 | 1169.41 | 7969.3  | 1   | 2001   | 86.4 | 16 | K.SPILVATAVAAR.G                                                   |
|                    | HsGST-MOCK_Ti_103.249i    | 2.9633 | 0.3145 | 2083.82 | 2084.3  | 6082    | 4   | 410.8  | 46.9 | 1  | K.HVINFDLPSDIEEYVHR.I                                              |
|                    | HsGST-MOCK_Ti_103.247i    | 4.8039 | 0.3748 | 2085.22 | 2084.3  | 6002.3  | 1   | 1189.1 | 45.3 | 2  | K.HVINFDLPSDIEEYVHR.I                                              |
|                    | HsGST-MOCK_Ti_404.319i    | 3.989  | 0.393  | 1525.26 | 1525.7  | 8108.9  | 1   | 1203.9 | 69.2 | 19 | R.VGNLGLATSFNER.N                                                  |
|                    | HsGST-MOCK_Ti_302.390i    | 2.6522 | 0.2065 | 1128.46 | 1129.34 | 7594.7  | 2   | 867.9  | 72.2 | 1  | K.DLLDLLVEAK.Q                                                     |
| gij 4826760 ref Nf |                           | 16     | 160    | 0.34    | 415     | 45672   | 5.6 | U      |      |    | heterogeneous nuclear ribonucleoprotein F [Homo sapiens]           |
| *                  | HsHeLa3_Ti_106.3082.308i  | 4.0915 | 0.3212 | 3755.52 | 3754.04 | 6864.5  | 1   | 630.6  | 25   | 2  | R.GLPWSCSVEDVQNFLSDCTIHDGAAGVHFIYTR.E                              |
| *                  | HsFLAG-Control_HeLa_NE    | 3.0634 | 0.3552 | 1710.28 | 1710.79 | 6719.6  | 1   | 870.3  | 60   | 2  | R.QSGEAFVELGSEDDVK.M                                               |
| *                  | HsFLAG-MOCK_300mM_T       | 3.9191 | 0.4346 | 1633.51 | 1631.66 | 6511.9  | 1   | 1450.7 | 73.3 | 4  | K.HSGPNSADSANDGFVR.L                                               |
| *                  | HsFLAG-Control_HeLa_NE    | 5.6087 | 0.3785 | 1868.59 | 1869.08 | 6985.5  | 1   | 2352   | 78.1 | 24 | K.ITGEAFVQFASQELAEK.A                                              |
| *                  | HsGST-MOCK_Ti_102.279i    | 4.2549 | 0.3983 | 3475    | 3476.71 | 9180.6  | 1   | 1122.4 | 26.6 | 2  | R.MRPGAYSTGYGGYEEYSGLSDGYGFTTDLFGR.D                               |
|                    | HsFLAG-Control_HeLa_S1i   | 3.9094 | 0.2338 | 1996.83 | 1998.2  | 9892.6  | 2   | 1192.3 | 40.6 | 1  | K.ATENDIYNFFSPLNPVR.V                                              |
|                    | HsFLAG-Control_HeLa_NE    | 4.6608 | 0.3601 | 1997.35 | 1998.2  | 7568.7  | 1   | 1568.7 | 68.8 | 16 | K.ATENDIYNFFSPLNPVR.V                                              |
|                    | HsFLAG-Control_293_Ti_2i  | 4.7208 | 0.3986 | 1997.49 | 1998.2  | 7549.3  | 1   | 1676.5 | 71.9 | 55 | K.ATENDIYNFFSPLNPVR.V                                              |
|                    | HsGST-MOCK_Ti_403.397i    | 4.7263 | 0.4323 | 1997.5  | 1998.2  | 7501    | 1   | 1361.2 | 65.6 | 2  | K.ATENDIYNFFSPLNPVR.V                                              |
|                    | HsFLAG-Control_HeLa_S1i   | 4.3947 | 0.4897 | 1997.59 | 1998.2  | 7565.5  | 1   | 1326.5 | 65.6 | 6  | K.ATENDIYNFFSPLNPVR.V                                              |
|                    | HsFLAG-Control_HeLa_NE    | 4.2241 | 0.188  | 1998.1  | 1998.2  | 8148.8  | 8   | 882.3  | 35.9 | 1  | K.ATENDIYNFFSPLNPVR.V                                              |
|                    | HsFLAG-Control_HeLa_NE    | 5.2012 | 0.4834 | 1998.25 | 1998.2  | 8235.9  | 1   | 1839.9 | 68.8 | 23 | K.ATENDIYNFFSPLNPVR.V                                              |
|                    | Hs293FLP-MG_Ti_202.411i   | 4.5072 | 0.2946 | 1998.27 | 1998.2  | 7716.3  | 1   | 1486.3 | 46.9 | 2  | K.ATENDIYNFFSPLNPVR.V                                              |
|                    | HsFLAG-Control_HeLa_NE    | 4.903  | 0.1706 | 1998.31 | 1998.2  | 8396.7  | 1   | 1484.8 | 43.8 | 2  | K.ATENDIYNFFSPLNPVR.V                                              |
|                    | HsFLAG-Control_HeLa_NE    | 2.6268 | 0.1908 | 1092.55 | 1093.23 | 6937.7  | 1   | 767.6  | 72.2 | 2  | R.VHIEIGPDGR.V                                                     |
|                    | HsFLAG-Control_HeLa_NE    | 3.4554 | 0.2844 | 1093.46 | 1093.23 | 5275.7  | 1   | 1166.4 | 83.3 | 16 | R.VHIEIGPDGR.V                                                     |
| gij 54291727 ref N |                           | 13     | 47     | 0.337   | 258     | 29135   | 7   | U      |      |    | spindlin family, member 2 [Homo sapiens]                           |
| gij 56682949 ref N |                           | 13     | 47     | 0.337   | 258     | 29158   | 7.2 | U      |      |    | spindlin-like protein 2 [Homo sapiens]                             |
| gij 56682947 ref N |                           | 13     | 47     | 0.337   | 258     | 29158   | 7.2 | U      |      |    | spindlin-like protein 2 [Homo sapiens]                             |
| gij 56682945 ref N |                           | 13     | 47     | 0.337   | 258     | 29158   | 7.2 | U      |      |    | spindlin-like protein 2 [Homo sapiens]                             |
|                    | HsFLAG-Control_HeLa_NE    | 3.0838 | 0.1501 | 1430.22 | 1430.47 | 8322.8  | 2   | 872.4  | 62.5 | 1  | K.TPNAQEAEGQQR.A                                                   |
|                    | HsHeLa_Control-MG_Ti_10   | 4.7712 | 0.4162 | 1912.73 | 1912.11 | 8148.4  | 1   | 1643   | 70   | 2  | R.ISHGWKEGDEPITQWK.G                                               |
|                    | HsHeLa_Control-MG_Ti_10   | 5.1045 | 0.4244 | 1813    | 1812.03 | 4668.3  | 1   | 1150.5 | 67.6 | 8  | R.VASSHISANLANTIIGK.A                                              |
|                    | HsHeLa_Control-MG_Ti_10   | 4.0915 | 0.3401 | 1777.54 | 1777.04 | 6757.4  | 1   | 1720   | 76.9 | 1  | K.DPVLYMYQLLDDYK.E                                                 |
|                    | HsFlag1P_Ti_106.3196.319i | 5.5281 | 0.375  | 2346.24 | 2347.65 | 10130.9 | 1   | 2660   | 66.7 | 4  | K.DPVLYMYQLLDDYKEGDLR.I                                            |
|                    | HsFLAG-Control_HeLa_S1i   | 4.5343 | 0.3515 | 2347.02 | 2347.65 | 4881.8  | 1   | 856.9  | 38.9 | 1  | K.DPVLYMYQLLDDYKEGDLR.I                                            |
|                    | HsF-IP-293-MG_Ti_106.27i  | 5.0438 | 0.2755 | 2347.34 | 2347.65 | 9931.9  | 1   | 2671.7 | 66.7 | 2  | K.DPVLYMYQLLDDYKEGDLR.I                                            |
|                    | HsFLAG-Control_HeLa_NE    | 2.7657 | 0.1821 | 854.29  | 854.037 | 3938.9  | 1   | 651.2  | 91.7 | 2  | K.PSVYFIK.F                                                        |
|                    | HsFLAG-Control_HeLa_NE    | 4.0442 | 0.3492 | 1789.83 | 1789.98 | 4977.2  | 1   | 817.4  | 46.2 | 1  | K.FDDDFHIYVYDLVK.K                                                 |
|                    | HsFLAG-Control_HeLa_S1i   | 3.9146 | 0.3163 | 1790.12 | 1789.98 | 4844.5  | 1   | 1279.7 | 55.8 | 3  | K.FDDDFHIYVYDLVK.K                                                 |
|                    | HsFLAG-Control_HeLa_NE    | 4.7853 | 0.4088 | 1790.36 | 1789.98 | 8202.8  | 1   | 2020.3 | 80.8 | 5  | K.FDDDFHIYVYDLVK.K                                                 |
|                    | HsFLAG-Control_HeLa_S1i   | 5.8606 | 0.4583 | 1790.46 | 1789.98 | 8612.6  | 1   | 2552   | 84.6 | 10 | K.FDDDFHIYVYDLVK.K                                                 |
|                    | HsFLAG-Control_HeLa_S1i   | 4.7497 | 0.4247 | 1791.38 | 1789.98 | 8548.6  | 1   | 1784.2 | 76.9 | 7  | K.FDDDFHIYVYDLVK.K                                                 |
| gij 21040371 ref N |                           | 12     | 50     | 0.335   | 427     | 49130   | 5.7 | U      |      |    | DEAD (Asp-Glu-Ala-Asp) box polypeptide 39 isoform 1 [Homo sapiens] |
|                    | HsFLAG-Control_HeLa_NE    | 2.9102 | 0.2152 | 1296.6  | 1297.41 | 4190.9  | 1   | 218.6  | 54.5 | 2  | K.GSYVSIHSSGFR.D                                                   |
|                    | HsFLAG-Control_HeLa_NE    | 3.3999 | 0.3467 | 1297.35 | 1297.41 | 6239.4  | 1   | 1014.2 | 72.7 | 2  | K.GSYVSIHSSGFR.D                                                   |
|                    | HsFLAG-Control_HeLa_NE    | 3.1536 | 0.356  | 1297.62 | 1297.41 | 5696.1  | 1   | 730.8  | 68.2 | 3  | K.GSYVSIHSSGFR.D                                                   |
|                    | HsFLAG-MOCK_300mM_T       | 5.1172 | 0.3001 | 3653.38 | 3654.03 | 4854.3  | 1   | 730.6  | 28.2 | 2  | R.AIVDCGFEHPSEVQHECIPQAILGMDVLCQAK.S                               |
|                    | HsFLAG-Control_HeLa_NE    | 3.0844 | 0.2693 | 1294.89 | 1293.43 | 7691.3  | 1   | 1289.5 | 77.3 | 1  | K.NCPHVVGTPGR.I                                                    |
|                    | HsFLAG-Control_HeLa_NE    | 3.4418 | 0.3925 | 1463.16 | 1463.72 | 5746.5  | 1   | 821.1  | 72.7 | 4  | K.LTLHGLQQYYVK.L                                                   |
|                    | HsFLAG-Control_HeLa_NE    | 3.6145 | 0.3768 | 1464    | 1463.72 | 6104.4  | 1   | 861.3  | 72.7 | 2  | K.LTLHGLQQYYVK.L                                                   |
| *                  | HsFLAG-Control_HeLa_S1i   | 3.5729 | 0.2601 | 2295.02 | 2296.7  | 8983    | 1   | 1021.6 | 50   | 2  | R.CMALAQLLVEQNFPAIAIHR.G                                           |

|                    |                          |        |        |         |         |         |      |        |      |                                                                           |
|--------------------|--------------------------|--------|--------|---------|---------|---------|------|--------|------|---------------------------------------------------------------------------|
|                    | HsFLAG-Control_HeLa_NE   | 3.7388 | 0.3438 | 1260.68 | 1260.53 | 7837.1  | 1    | 1712.5 | 90   | 1 R.RILVATNLFGR.G                                                         |
|                    | HsFLAG-Control_HeLa_S10  | 3.8361 | 0.2249 | 1104.14 | 1104.34 | 5719.5  | 1    | 1117.8 | 83.3 | 14 R.ILVATNLFGR.G                                                         |
| *                  | HsFLAG-Control_HeLa_NE   | 4.782  | 0.4338 | 1480.11 | 1480.62 | 6927.2  | 1    | 1731.5 | 80.8 | 16 K.GLAITFVSDENDAK.I                                                     |
| gi 4507143 ref NF  | HsFLAG-Control_HeLa_NE   | 3.8132 | 0.1533 | 3536.69 | 3536.87 | 10613.9 | 1    | 935.3  | 24.1 | 1 K.ILNDVQDRFEVNVVAELPEEIDISTYIEQSR.-                                     |
|                    |                          | 3      | 8      | 0.333   | 162     | 18762   | 8.7  | U      |      | sorting nexin 3 isoform a [Homo sapiens]                                  |
|                    | HsFLAG-Control_HeLa_NE   | 5.1714 | 0.2769 | 3555.36 | 3555.97 | 9112.3  | 1    | 1335.2 | 27.3 | 2 R.LITKPQNLNDAYGPPSNFLEIDVSNPQTVGVGR.G                                   |
|                    | HsFLAG-Control_HeLa_NE   | 2.2128 | 0.1182 | 832.59  | 833.018 | 4619.6  | 3    | 399.9  | 75   | 1 K.TNLPFIK.L                                                             |
|                    | HsFLAG-Control_HeLa_NE   | 4.6542 | 0.392  | 1643.94 | 1642.68 | 3987.3  | 1    | 836.7  | 76.9 | 5 R.GDDGIFDDNFIEER.K                                                      |
| gi 25453472 ref NF |                          | 9      | 22     | 0.331   | 281     | 31122   | 5    | U      |      | eukaryotic translation elongation factor 1 delta isoform 2 [Homo sapiens] |
| gi 25453474 ref NF |                          | 9      | 22     | 0.144   | 647     | 71408   | 6.4  | U      |      | eukaryotic translation elongation factor 1 delta isoform 1 [Homo sapiens] |
|                    | HsHeLa3_Ti_104.1528.152  | 4.8195 | 0.4698 | 2185.3  | 2186.3  | 7501.5  | 1    | 1101   | 47.8 | 3 K.SLAGSSGPGASSGTSGDHGELVVR.I                                            |
|                    | HsFLAG-Control_HeLa_S10  | 3.7254 | 0.2887 | 1359.28 | 1359.52 | 7795.7  | 1    | 1366.3 | 77.3 | 1 R.IASLEVENQSLR.G                                                        |
|                    | HsFLAG-Control_HeLa_S10  | 3.713  | 0.2044 | 1300.52 | 1300.5  | 7733.2  | 1    | 1557.5 | 81.8 | 3 R.GVVQELQQAISK.L                                                        |
|                    | HsHeLa3_Ti_106.1858.185  | 3.0676 | 0.2947 | 1424.74 | 1424.62 | 6575.4  | 1    | 882.4  | 62.5 | 1 R.ATAPQTQHVSMPMR.Q                                                      |
|                    | HsFLAG-Control_MG_293_   | 2.0266 | 0.1299 | 726.64  | 726.938 | 3702.4  | 1    | 463.1  | 83.3 | 3 K.KPALVAK.S                                                             |
|                    | HsHeLa3_Ti_103.2748.274  | 3.7792 | 0.2643 | 1374.83 | 1374.58 | 7375.9  | 1    | 1566.3 | 79.2 | 1 R.SIQLDGLVWGASK.L                                                       |
|                    | HsGST-MOCK_Ti_304.189    | 2.9994 | 0.3378 | 1474.47 | 1475.65 | 4272.6  | 2    | 535    | 63.6 | 3 R.KLQIQCVVEDDK.V                                                        |
|                    | HsGST-MOCK_Ti_404.199    | 4.8653 | 0.3375 | 1474.84 | 1475.65 | 7647.6  | 1    | 2151.3 | 90.9 | 5 R.KLQIQCVVEDDK.V                                                        |
|                    | HsGST-MOCK_Ti_101.077    | 4.8945 | 0.3341 | 1475.3  | 1475.65 | 7192.3  | 1    | 1660.3 | 86.4 | 2 R.KLQIQCVVEDDK.V                                                        |
| gi 4758504 ref NF  |                          | 4      | 15     | 0.33    | 261     | 26923   | 7.8  | U      |      | hydroxyacyl-Coenzyme A dehydrogenase, type II isoform 1 [Homo sapiens]    |
| *                  | Hs293FLP-MG_Ti_203.353   | 4.5517 | 0.5278 | 1813.74 | 1814.09 | 8178.5  | 1    | 1715.4 | 65.8 | 1 K.GLVAVITGGASGLGLATAER.L                                                |
| *                  | HsFLAG-Control_293_Ti_20 | 4.9921 | 0.4171 | 2197.02 | 2196.47 | 6445.5  | 1    | 784    | 45.5 | 10 R.LVGQGASAVLLDLPNSGGAEQAK.K                                            |
| *                  | Hs293FLP-MG_Ti_204.181   | 3.7194 | 0.498  | 1849.56 | 1851.03 | 7100.3  | 1    | 681.7  | 59.4 | 1 K.KLGNNCVFAPADVTSEK.D                                                   |
| *                  | HsHeLa_Control-MG_Ti_20  | 6.0284 | 0.3869 | 2880.1  | 2880.27 | 9621.7  | 1    | 2386.9 | 38   | 3 R.LGDPAEYAHLVQAIHENPFLNGEVIR.L                                          |
| gi 7019485 ref NF  |                          | 7      | 35     | 0.33    | 191     | 21868   | 5.4  | U      |      | programmed cell death 6 [Homo sapiens]                                    |
|                    | Hs293FLP-MG_Ti_203.393   | 4.6801 | 0.4089 | 3191.57 | 3190.5  | 8001.6  | 1    | 828.5  | 26.8 | 2 K.DRSGVISDTELQQALSNGTWTFPNPVTVR.S                                       |
|                    | HsHeLa_Control-MG_Ti_20  | 4.1809 | 0.329  | 2918.73 | 2919.22 | 6930.2  | 1    | 1003.4 | 42.3 | 4 R.SGVISDTELQQALSNGTWTFPNPVTVR.S                                         |
|                    | Hs293FLP-MG_Ti_202.431   | 4.2992 | 0.2749 | 2919.43 | 2919.22 | 7920.8  | 2    | 651.2  | 27.9 | 1 R.SGVISDTELQQALSNGTWTFPNPVTVR.S                                         |
| *                  | HsHeLa_Control-MG_Ti_20  | 3.9883 | 0.2535 | 1442.44 | 1442.61 | 6433.9  | 1    | 1289.9 | 75   | 7 K.AGVNFSEFTGVWK.Y                                                       |
| *                  | HsHeLa_Control-MG_Ti_20  | 3.7243 | 0.3234 | 1342.26 | 1342.5  | 5882.2  | 1    | 1071.4 | 83.3 | 7 K.YITDWQNVFR.T                                                          |
| *                  | Hs293FLP-MG_Ti_203.235   | 2.3835 | 0.3205 | 1356.56 | 1357.55 | 6245.9  | 1    | 679.5  | 70   | 1 R.LSDQFHDILIR.K                                                         |
| *                  | HsHeLa_Control-MG_Ti_20  | 4.2041 | 0.2757 | 1357.85 | 1357.55 | 8001.4  | 1    | 1594.4 | 85   | 13 R.LSDQFHDILIR.K                                                        |
| gi 4506645 ref NF  |                          | 2      | 8      | 0.329   | 70      | 8218    | 10.1 | U      |      | ribosomal protein L38 [Homo sapiens]                                      |
| *                  | HsGST-MOCK_Ti_103.196    | 4.4816 | 0.2776 | 1578.57 | 1576.88 | 6968.5  | 1    | 1797.8 | 87.5 | 6 R.KIEEIKDFLLTAR.R                                                       |
| *                  | HsGST-MOCK_Ti_404.272    | 2.9826 | 0.2254 | 1229.56 | 1229.46 | 7540.3  | 2    | 687.7  | 66.7 | 2 R.YLYTLVITDK.E                                                          |
| gi 4758302 ref NF  |                          | 17     | 91     | 0.327   | 104     | 12259   | 5.9  | U      |      | enhancer of rudimentary homolog [Homo sapiens]                            |
| *                  | HsHeLa_Control-MG_Ti_20  | 5.7567 | 0.5199 | 2056.71 | 2056.14 | 7458.8  | 1    | 1813   | 75   | 51 R.TYADYESVNECMGVCK.M                                                   |
| *                  | HsFLAG-Control_HeLa_NE   | 3.5185 | 0.3103 | 1328.12 | 1329.41 | 4744.2  | 4    | 511.6  | 65   | 2 R.ADTQTYQPYNK.D                                                         |
| *                  | HsF-IP-293-MG_Ti_102.11  | 2.3533 | 0.2235 | 1328.18 | 1329.41 | 4555.5  | 1    | 331.2  | 55   | 2 R.ADTQTYQPYNK.D                                                         |
| *                  | Hs293FLP_TREX_Ti_102.1   | 2.2731 | 0.3091 | 1328.35 | 1329.41 | 4429.4  | 1    | 413.5  | 65   | 1 R.ADTQTYQPYNK.D                                                         |
| *                  | Hs293FLP-MG_Ti_102.103   | 1.9606 | 0.3226 | 1328.49 | 1329.41 | 3743.6  | 3    | 288    | 60   | 1 R.ADTQTYQPYNK.D                                                         |
| *                  | HsFLAG-Control_HeLa_NE   | 2.439  | 0.2217 | 1328.55 | 1329.41 | 6219    | 1    | 587.5  | 65   | 1 R.ADTQTYQPYNK.D                                                         |
| *                  | Hs283FLP_Ti_102.1173.11  | 2.7337 | 0.273  | 1328.57 | 1329.41 | 4622    | 5    | 347    | 55   | 1 R.ADTQTYQPYNK.D                                                         |
| *                  | HsF-IP-293-MG_Ti_102.11  | 3.4114 | 0.3154 | 1328.62 | 1329.41 | 5194    | 1    | 841.9  | 75   | 2 R.ADTQTYQPYNK.D                                                         |
| *                  | HsHeLa_Control_Ti_102.10 | 2.3573 | 0.3181 | 1328.68 | 1329.41 | 4483.3  | 1    | 415.8  | 65   | 2 R.ADTQTYQPYNK.D                                                         |
| *                  | HsFLAG-MOCK_300mM_T      | 3.5707 | 0.2422 | 1329.28 | 1329.41 | 6066.4  | 1    | 787    | 70   | 9 R.ADTQTYQPYNK.D                                                         |
| *                  | Hs293FLP_TREX_Ti_102.1   | 3.6393 | 0.2883 | 1329.3  | 1329.41 | 5099.9  | 1    | 1017.3 | 80   | 2 R.ADTQTYQPYNK.D                                                         |
| *                  | Hs283FLP_Ti_102.1165.11  | 3.3405 | 0.2277 | 1329.39 | 1329.41 | 4804.6  | 1    | 770.1  | 75   | 2 R.ADTQTYQPYNK.D                                                         |
| *                  | HsFLAG-Control_HeLa_NE   | 2.6617 | 0.2666 | 1329.58 | 1329.41 | 5126.9  | 1    | 477.5  | 65   | 2 R.ADTQTYQPYNK.D                                                         |



|                    |                           |        |        |         |         |        |   |        |      |                                                                     |
|--------------------|---------------------------|--------|--------|---------|---------|--------|---|--------|------|---------------------------------------------------------------------|
| *                  | HsHeLa_Control_Ti_102.10  | 3.6473 | 0.3001 | 1330.11 | 1329.41 | 5301.2 | 1 | 830.7  | 75   | 2 R.ADTQTYQPYNK.D                                                   |
| *                  | Hs293FLP-MG_Ti_102.107    | 3.5789 | 0.2266 | 1330.49 | 1329.41 | 4850.4 | 4 | 589    | 70   | 2 R.ADTQTYQPYNK.D                                                   |
| *                  | HsFLAG-Control_HeLa_NE    | 3.5597 | 0.3191 | 1871.5  | 1872.04 | 5456.2 | 1 | 940.5  | 67.9 | 7 R.ADTQTYQPYNKDWIK.E                                               |
| *                  | HsFlag1P_Ti_104.2021.202  | 3.0758 | 0.1253 | 2128.3  | 2129.33 | 5849.4 | 1 | 645.1  | 56.2 | 2 R.ADTQTYQPYNKDWIKEK.I                                             |
| gi 4501881 ref NF  | 20                        | 161    | 0.326  | 377     | 42051   | 5.4 U  |   |        |      | alpha 1 actin precursor [Homo sapiens]                              |
| gi 4885049 ref NF  | 20                        | 161    | 0.326  | 377     | 42019   | 5.4 U  |   |        |      | cardiac muscle alpha actin proprotein [Homo sapiens]                |
|                    | HsFLAG-Control_HeLa_S1(   | 2.2896 | 0.2133 | 976.42  | 977.021 | 5697.3 | 5 | 418.5  | 61.1 | 1 K.AGFAGDDAPR.A                                                    |
|                    | HsFLAG-Control_Hela_Ti_1  | 3.0127 | 0.1884 | 976.63  | 977.021 | 5102.4 | 1 | 1237.5 | 88.9 | 9 K.AGFAGDDAPR.A                                                    |
|                    | HsHeLa_Control_Ti_102.11  | 2.1727 | 0.108  | 976.67  | 977.021 | 4557.8 | 2 | 513.5  | 66.7 | 1 K.AGFAGDDAPR.A                                                    |
|                    | HsFLAG-MOCK_150mM_T       | 3.2886 | 0.2636 | 978.67  | 977.021 | 5248.4 | 1 | 1406.5 | 88.9 | 20 K.AGFAGDDAPR.A                                                   |
|                    | HsFLAG-Control_HeLa_S1(   | 2.6516 | 0.2088 | 946.02  | 946.137 | 3258.8 | 2 | 623.5  | 87.5 | 1 R.AVFPISIVGR.P                                                    |
|                    | HsFLAG-MOCK_300mM_T       | 3.5305 | 0.3215 | 1199.52 | 1199.44 | 7004.5 | 2 | 801.6  | 75   | 15 R.AVFPISIVGRPR.H                                                 |
|                    | HsFLAG-MOCK_300mM_T       | 2.8034 | 0.3247 | 1171.52 | 1172.41 | 5485.7 | 1 | 609.4  | 65   | 3 R.HQGVMVGMGQK.D                                                   |
|                    | HsHeLa3_Ti_106.1966.196   | 2.937  | 0.3448 | 1171.61 | 1172.41 | 5543.4 | 1 | 647.3  | 65   | 2 R.HQGVMVGMGQK.D                                                   |
|                    | HsHeLa3_Ti_106.1967.196   | 3.1676 | 0.3309 | 1172.92 | 1172.41 | 4063.3 | 1 | 693.8  | 80   | 1 R.HQGVMVGMGQK.D                                                   |
|                    | HsFLAG-MOCK_300mM_T       | 3.105  | 0.361  | 1173.72 | 1172.41 | 4167.5 | 1 | 841.2  | 85   | 2 R.HQGVMVGMGQK.D                                                   |
|                    | HsFLAG-MOCK_300mM_T       | 5.2956 | 0.4824 | 2351.94 | 2352.6  | 7863.3 | 1 | 2199.1 | 66.7 | 2 R.HQGVMVGMGQKDSYVGDEAQS.K                                         |
|                    | HsFLAG-Control_HeLa_S1(   | 3.424  | 0.33   | 1199.08 | 1199.22 | 4776.6 | 2 | 971.4  | 85   | 4 K.DSYVGDEAQS.K                                                    |
|                    | HsFLAG-MOCK_300mM_T       | 4.3505 | 0.1577 | 1962.79 | 1962.18 | 6559.2 | 1 | 1122.5 | 66.7 | 4 K.YPIEHGIITNWDDMEK.I                                              |
|                    | HsFLAG-Control_Hela_Ti_1  | 3.2795 | 0.3331 | 1515.45 | 1516.7  | 7777.5 | 1 | 997.2  | 75   | 12 K.IWHHTFYNELR.V                                                  |
|                    | HsFLAG-MOCK_300mM_T       | 2.4013 | 0.1049 | 1515.69 | 1516.7  | 5047.5 | 1 | 338.5  | 60   | 1 K.IWHHTFYNELR.V                                                   |
|                    | HsHeLa_Control-MG_Ti_10   | 3.3547 | 0.3682 | 1518.65 | 1516.7  | 5691.8 | 1 | 740.7  | 75   | 4 K.IWHHTFYNELR.V                                                   |
|                    | HsFLAG-Control_HeLa_S1(   | 4.0056 | 0.3243 | 1959.67 | 1957.23 | 5828.4 | 1 | 593.6  | 55.9 | 3 R.VAPEEHPTLLTEAPLNPK.A                                            |
|                    | HsFLAG-Control_293_Ti_2(  | 2.3671 | 0.1397 | 1000.32 | 999.167 | 7387.7 | 9 | 624.4  | 71.4 | 2 R.DLTDYLMK.I                                                      |
|                    | HsHeLa_Control-MG_Ti_20   | 5.1912 | 0.2593 | 1792.4  | 1791.96 | 5309.1 | 1 | 1957.5 | 86.7 | 64 K.SYELPDGQVITIGNER.F                                             |
|                    | HsHeLa_Control-MG_Ti_10   | 2.6274 | 0.294  | 1161.67 | 1162.39 | 4080.9 | 1 | 437    | 65   | 10 K.EITALAPSTMK.I                                                  |
| gi 5453990 ref NF  | 7                         | 13     | 0.325  | 249     | 28723   | 6 U    |   |        |      | proteasome activator subunit 1 isoform 1 [Homo sapiens]             |
|                    | HsFLAG-Control_HeLa_S1(   | 4.0117 | 0.2953 | 1269.45 | 1269.44 | 5555.9 | 2 | 1124.6 | 85   | 1 K.TENLLGSYFPK.K                                                   |
|                    | HsFLAG-Control_HeLa_S1(   | 3.4619 | 0.3172 | 1415.43 | 1413.57 | 7475.7 | 1 | 701.5  | 58.3 | 4 K.EPALNEANLSNLK.A                                                 |
|                    | HsFLAG-Control_HeLa_S1(   | 3.4651 | 0.3362 | 1261.56 | 1261.5  | 3498.4 | 4 | 495.7  | 68.2 | 1 K.APLDIPVPDPVK.E                                                  |
|                    | HsFLAG-Control_HeLa_S1(   | 3.4385 | 0.288  | 1519.36 | 1518.79 | 4013   | 2 | 466.6  | 61.5 | 2 K.APLDIPVPDPVKEK.E                                                |
|                    | HsFLAG-Control_HeLa_S1(   | 4.295  | 0.2818 | 2280.34 | 2280.67 | 8483.2 | 2 | 1126.4 | 52.8 | 2 K.DVIEQLNLVTTWLQLQIPR.I                                           |
|                    | HsFLAG-Control_HeLa_S1(   | 2.5057 | 0.1405 | 1504.64 | 1502.62 | 6543.7 | 2 | 603.5  | 68.2 | 1 R.QLVELDEAEYR.D                                                   |
| *                  | HsFLAG-Control_HeLa_S1(   | 4.0935 | 0.3617 | 1398.07 | 1396.67 | 8360   | 1 | 1613.2 | 81.8 | 2 R.NAYAVLYDIILK.N                                                  |
| gi 4505409 ref NF  | 4                         | 18     | 0.322  | 152     | 17298   | 8.4 U  |   |        |      | non-metastatic cells 2, protein (NM23B) expressed in [Homo sapiens] |
| gi 66392227 ref NF | 4                         | 18     | 0.322  | 152     | 17298   | 8.4 U  |   |        |      | non-metastatic cells 2, protein (NM23B) expressed in [Homo sapiens] |
| gi 66392205 ref NF | 4                         | 18     | 0.322  | 152     | 17298   | 8.4 U  |   |        |      | non-metastatic cells 2, protein (NM23B) expressed in [Homo sapiens] |
| gi 66392203 ref NF | 4                         | 28     | 0.184  | 267     | 30137   | 8.9 U  |   |        |      | NME1-NME2 protein [Homo sapiens]                                    |
| gi 66392192 ref NF | 4                         | 18     | 0.322  | 152     | 17298   | 8.4 U  |   |        |      | non-metastatic cells 2, protein (NM23B) expressed in [Homo sapiens] |
|                    | HsHeLa_Control-MG_Ti_20   | 3.8743 | 0.2064 | 1345.49 | 1345.59 | 6946.5 | 6 | 915.1  | 68.2 | 8 R.TFIAIKPDGVQR.G                                                  |
|                    | Hs293FLP_Ti_305.2093.20   | 2.9077 | 0.2113 | 1178.01 | 1176.4  | 6241   | 1 | 826.7  | 72.2 | 5 K.DRPFPPGLVK.Y                                                    |
|                    | HsF-IP-293_Ti_205.1656.1( | 3.1597 | 0.1115 | 1786.66 | 1787.04 | 7174.9 | 3 | 745.9  | 56.2 | 2 R.VMLGETNPADSKPGTIR.G                                             |
|                    | Hs293FLP_TREX_Ti_104.1    | 2.1945 | 0.1136 | 1069.37 | 1070.19 | 3659.5 | 1 | 365.4  | 66.7 | 3 R.NIIHGSDSVK.S                                                    |
| gi 4507793 ref NF  | 8                         | 22     | 0.322  | 152     | 17138   | 6.6 U  |   |        |      | ubiquitin-conjugating enzyme E2N [Homo sapiens]                     |
|                    | HsFLAG-Control_HeLa_NE    | 1.9653 | 0.0863 | 1036.55 | 1037.29 | 6171.5 | 8 | 489.4  | 61.1 | 2 R.LLAEPVPGIK.A                                                    |
| *                  | HsFLAG-Control_HeLa_S1(   | 4.8589 | 0.3684 | 2196.64 | 2197.46 | 6063.6 | 1 | 1132.3 | 57.9 | 7 R.YFHVVIAGPQDSPFEGGTFK.L                                          |
| *                  | HsFLAG-Control_HeLa_NE    | 4.7876 | 0.2597 | 2196.98 | 2197.46 | 6019.2 | 1 | 696.5  | 47.4 | 2 R.YFHVVIAGPQDSPFEGGTFK.L                                          |
| *                  | HsFLAG-Control_HeLa_S1(   | 4.6427 | 0.2606 | 2197.14 | 2197.46 | 5489.4 | 1 | 1197.6 | 42.1 | 2 R.YFHVVIAGPQDSPFEGGTFK.L                                          |
| *                  | HsFLAG-Control_HeLa_S1(   | 3.9031 | 0.282  | 2197.48 | 2197.46 | 6811.2 | 1 | 858.1  | 50   | 1 R.YFHVVIAGPQDSPFEGGTFK.L                                          |

|                   |                          |        |        |         |         |         |      |        |      |    |                                                                      |
|-------------------|--------------------------|--------|--------|---------|---------|---------|------|--------|------|----|----------------------------------------------------------------------|
| *                 | HsFLAG-Control_HeLa_NE   | 5.0106 | 0.3735 | 2198.93 | 2197.46 | 7056.2  | 1    | 1566.3 | 44.7 | 2  | R.YFHVVIAGPQDSPFEGGTFK.L                                             |
|                   | HsFLAG-Control_HeLa_NE   | 2.2374 | 0.1709 | 985.41  | 986.115 | 5569.4  | 3    | 594.8  | 78.6 | 3  | K.IYHPNVDK.L                                                         |
|                   | HsFLAG-Control_HeLa_S10  | 4.1792 | 0.3064 | 1204.19 | 1204.28 | 9508.9  | 1    | 2276.3 | 90   | 3  | K.TNEAQAIETAR.A                                                      |
| gi 49574541 ref N |                          | 2      | 4      | 0.321   | 109     | 11601   | 7.8  | U      |      |    | hypothetical protein LOC113386 [Homo sapiens]                        |
| *                 | Hs293FLP-MG_Ti_202.378   | 3.4158 | 0.2625 | 1600.86 | 1600.86 | 4340.9  | 2    | 798.1  | 69.2 | 1  | R.DPWYSTVGLLPPVR.A                                                   |
| *                 | Hs293FLP-MG_Ti_202.302   | 4.0851 | 0.4894 | 2247.75 | 2247.53 | 6811.3  | 1    | 715.7  | 47.5 | 3  | K.TEQGPTGVTMTSNPITWGQIK.K                                            |
| gi 5803137 ref NF |                          | 2      | 4      | 0.318   | 157     | 17170   | 8.9  | U      |      |    | RNA binding motif protein 3 isoform a [Homo sapiens]                 |
| gi 63054840 ref N |                          | 2      | 4      | 0.556   | 90      | 9668    | 4.8  | U      |      |    | RNA binding motif protein 3 isoform b [Homo sapiens]                 |
|                   | HsHeLa3_Ti_104.4219.422  | 4.0525 | 0.2935 | 3498.05 | 3496.9  | 6957.5  | 1    | 642.8  | 24.2 | 2  | K.LFVGGLNFNTDEQALEDHFSSFGPISEVVVVK.D                                 |
|                   | HsHeLa3_Ti_106.2590.259  | 4.1592 | 0.4415 | 1983.03 | 1983.25 | 6339.6  | 1    | 1326.5 | 61.8 | 2  | R.GFGFITFTNPEHASVAMR.A                                               |
| gi 14110414 ref N |                          | 11     | 23     | 0.317   | 306     | 32835   | 8.2  | U      |      |    | heterogeneous nuclear ribonucleoprotein D isoform c [Homo sapiens]   |
| gi 14110420 ref N |                          | 11     | 23     | 0.273   | 355     | 38434   | 7.8  | U      |      |    | heterogeneous nuclear ribonucleoprotein D isoform a [Homo sapiens]   |
|                   | HsHeLa3_Ti_103.0707.070  | 3.205  | 0.2524 | 1971.73 | 1972.98 | 7003.9  | 2    | 626.7  | 47.1 | 1  | K.IDASKNEEDEGHSSNSPR.H                                               |
|                   | HsHeLa3_Ti_103.2727.272  | 3.6095 | 0.2337 | 1357.22 | 1356.58 | 5439.5  | 1    | 1313.4 | 86.4 | 2  | K.MFIGGLSWDTTK.K                                                     |
|                   | HsHeLa3_Ti_105.2386.238  | 3.3375 | 0.2791 | 1484.65 | 1484.75 | 5195    | 1    | 1139.9 | 79.2 | 2  | K.MFIGGLSWDTTK.D                                                     |
|                   | HsHeLa3_Ti_105.3002.300  | 2.8793 | 0.2666 | 915.6   | 915.123 | 2537.7  | 6    | 545.2  | 85.7 | 2  | R.GFGFVLFK.E                                                         |
|                   | HsHeLa3_Ti_104.1771.177  | 4.6677 | 0.2891 | 1619.75 | 1617.84 | 7068    | 1    | 2274.4 | 78.6 | 4  | K.KIFVGGLSPDTPEEK.I                                                  |
|                   | HsHeLa3_Ti_103.1874.187  | 2.5831 | 0.3016 | 1488.81 | 1489.67 | 6337.8  | 1    | 530.1  | 53.8 | 1  | K.IFVGGLSPDTPEEK.I                                                   |
|                   | HsHeLa3_Ti_103.1866.186  | 4.8348 | 0.2472 | 1489.94 | 1489.67 | 6412.6  | 1    | 1324.3 | 76.9 | 2  | K.IFVGGLSPDTPEEK.I                                                   |
|                   | HsHeLa3_Ti_105.3136.313  | 3.4757 | 0.1879 | 2432.29 | 2431.72 | 5246    | 3    | 440.3  | 42.5 | 3  | K.IREYFGGFGEVESIELPMDNK.T                                            |
|                   | HsHeLa3_Ti_102.3414.341  | 3.7385 | 0.3291 | 2162.32 | 2162.38 | 7472.3  | 1    | 618.6  | 44.4 | 1  | R.EYFGGFGEVESIELPMDNK.T                                              |
|                   | HsHeLa3_Ti_105.2478.247  | 4.3636 | 0.4322 | 1733.05 | 1731.95 | 5512.6  | 1    | 1039.4 | 73.1 | 3  | R.GFCFITFKEEPEVK.K                                                   |
|                   | HsHeLa3_Ti_106.1846.184  | 2.6852 | 0.2626 | 917.56  | 918.04  | 5033.3  | 1    | 602.6  | 71.4 | 2  | K.YHNVGLSK.C                                                         |
| gi 4506901 ref NF |                          | 5      | 25     | 0.317   | 164     | 19330   | 11.6 | U      |      |    | splicing factor, arginine/serine-rich 3 [Homo sapiens]               |
| *                 | Hs293FLP_TREX_Ti_102.1   | 3.3868 | 0.2654 | 1249.63 | 1249.37 | 6142.3  | 1    | 1337.2 | 81.8 | 4  | K.VYVGNLGNNGNK.T                                                     |
| *                 | HsGST-MOCK_Ti_305.220    | 2.8124 | 0.3226 | 1043.37 | 1044.2  | 4716.5  | 3    | 727.7  | 75   | 6  | R.AFGYYGPLR.S                                                        |
|                   | HsHeLa_Control-MG_Ti_20  | 4.0134 | 0.3097 | 1622.36 | 1622.78 | 7266    | 1    | 1224.3 | 73.1 | 12 | R.NPPGFAFVEFEDPR.D                                                   |
| *                 | HsGST-MOCK_Ti_304.313    | 2.891  | 0.1581 | 2321.5  | 2321.51 | 4845.3  | 1    | 310.2  | 42.5 | 2  | R.NPPGFAFVEFEDPRDAADAVR.E                                            |
| *                 | HsGST-MOCK_Ti_104.127    | 2.8901 | 0.1946 | 1125.49 | 1124.25 | 5275.6  | 6    | 680.7  | 77.8 | 1  | R.NRGPPPSWGR.R                                                       |
| gi 34577110 ref N |                          | 9      | 18     | 0.316   | 364     | 39420   | 8.1  | U      |      |    | aldolase A [Homo sapiens]                                            |
| gi 4557305 ref NF |                          | 9      | 18     | 0.316   | 364     | 39420   | 8.1  | U      |      |    | aldolase A [Homo sapiens]                                            |
| gi 34577112 ref N |                          | 9      | 18     | 0.316   | 364     | 39420   | 8.1  | U      |      |    | aldolase A [Homo sapiens]                                            |
|                   | HsHeLa3_Ti_102.1703.170  | 3.7499 | 0.4137 | 1333.4  | 1333.48 | 6129.3  | 1    | 1382.1 | 76.9 | 1  | K.GILAADESTGSIK.R                                                    |
|                   | HsHeLa3_Ti_102.1690.169  | 2.4184 | 0.3637 | 1333.65 | 1333.48 | 4457.7  | 1    | 470.4  | 61.5 | 1  | K.GILAADESTGSIK.R                                                    |
|                   | HsHeLa3_Ti_102.1367.136  | 3.7466 | 0.317  | 1491.4  | 1491.56 | 6130.3  | 1    | 847.2  | 66.7 | 3  | R.LQSIGTENTEENR.R                                                    |
|                   | HsHeLa3_Ti_106.2806.280  | 3.8688 | 0.3347 | 3115.36 | 3115.57 | 10693.9 | 1    | 621.4  | 23.1 | 1  | R.QLLLTADDRVNPICIGGVILFHETLYQK.A                                     |
|                   | HsHeLa3_Ti_105.2874.287  | 4.8429 | 0.2048 | 2107.74 | 2108.42 | 7145.9  | 1    | 1163.7 | 38.2 | 3  | K.IGEHTPSALAIMENANVLAR.Y                                             |
|                   | HsHeLa3_Ti_105.2862.286  | 4.5914 | 0.4418 | 2108.93 | 2108.42 | 4633.3  | 1    | 811.5  | 57.9 | 3  | K.IGEHTPSALAIMENANVLAR.Y                                             |
|                   | HsHeLa3_Ti_103.1446.144  | 2.1033 | 0.1778 | 763.77  | 763.955 | 6992.1  | 2    | 713.3  | 75   | 2  | K.VLAAVYK.A                                                          |
|                   | Hs293FLP_TREX_Ti_106.2   | 3.8714 | 0.2796 | 1289.6  | 1289.44 | 7119.9  | 1    | 1376.3 | 81.8 | 2  | K.RALANSLACQGY                                                       |
|                   | HsHeLa3_Ti_103.2179.217  | 3.8984 | 0.3719 | 2230.55 | 2229.37 | 5228    | 1    | 783.9  | 52.4 | 2  | K.YTPSGQAGAAASESLFVSNHAY.-                                           |
| gi 89047143 ref X |                          | 48     | 155    | 0.313   | 1848    | 213671  | 7.2  | U      |      |    | PREDICTED: myosin VB isoform 1 [Homo sapiens]                        |
| gi 89047438 ref X |                          | 48     | 155    | 0.313   | 1848    | 213641  | 7.2  | U      |      |    | PREDICTED: similar to Myosin-5B (Myosin Vb) isoform 5 [Homo sapiens] |
|                   | Hs283FLP_Ti_102.2467.24  | 4.5141 | 0.4208 | 1835.5  | 1834.03 | 5736.2  | 1    | 1155.5 | 71.4 | 6  | R.LEDETILEYPIDVQR.N                                                  |
|                   | HsFLAG-Control_293_Ti_10 | 3.1998 | 0.3473 | 2985.89 | 2987.38 | 9516    | 1    | 491.7  | 30.8 | 2  | R.NPDILVGENDLTALSYLHEPAVLHNLK.V                                      |
|                   | HsFLAG-Control_293_Ti_10 | 4.0441 | 0.3285 | 2986.64 | 2987.38 | 4144    | 1    | 487.8  | 28.8 | 2  | R.NPDILVGENDLTALSYLHEPAVLHNLK.V                                      |
|                   | HsFLAG-Control_293_Ti_10 | 2.9882 | 0.3546 | 1346.45 | 1347.47 | 4838.8  | 1    | 465.2  | 61.5 | 1  | K.NQSIIVSGESGAGK.T                                                   |
|                   | HsFLAG-Control_293_Ti_20 | 3.863  | 0.277  | 1346.79 | 1347.47 | 6221.8  | 1    | 1506   | 80.8 | 5  | K.NQSIIVSGESGAGK.T                                                   |
|                   | HsFLAG-Control_293_Ti_10 | 5.0198 | 0.5791 | 1803.17 | 1803.92 | 5108.4  | 1    | 1357.1 | 78.1 | 2  | R.YFATVGGASSETNIEEK.V                                                |

|                           |        |        |         |         |         |       |                                                       |      |                                                                         |
|---------------------------|--------|--------|---------|---------|---------|-------|-------------------------------------------------------|------|-------------------------------------------------------------------------|
| HsFLAG-Control_293_Ti_1(  | 2.3489 | 0.3134 | 1500.45 | 1501.78 | 7347.3  | 1     | 444.8                                                 | 46.4 | 2 K.VLASSPIMEAIGNAK.T                                                   |
| HsFLAG-Control_MG_293_    | 3.9652 | 0.3977 | 1501.59 | 1501.78 | 5445.7  | 1     | 598                                                   | 57.1 | 4 K.VLASSPIMEAIGNAK.T                                                   |
| HsFLAG-Control_293_Ti_1(  | 5.9249 | 0.491  | 2143.98 | 2143.42 | 8806.5  | 1     | 2185.4                                                | 70.6 | 2 R.NYHIFYQLCAAAGLPEFK.E                                                |
| HsFLAG-Control_293_Ti_1(  | 5.977  | 0.4083 | 3487.85 | 3488.61 | 9815.9  | 1     | 1226.2                                                | 28.2 | 3 K.ELAL TSAEDFFYTSQGGDTSIEGVDDAEDFEK.T                                 |
| HsFLAG-Control_293_Ti_1(  | 4.8326 | 0.4568 | 1792.62 | 1792.13 | 6881.2  | 1     | 1488.5                                                | 68.8 | 2 K.IIASILHLGSAIQAER.D                                                  |
| HsFLAG-Control_293_Ti_1(  | 4.3336 | 0.4445 | 2219.31 | 2221.27 | 5806.5  | 1     | 850.7                                                 | 55.6 | 4 R.DGDSCSISPQDVYLSNFCR.L                                               |
| HsFLAG-Control_MG_293_    | 4.012  | 0.3475 | 1261.8  | 1261.48 | 9899.8  | 1     | 1586.9                                                | 80   | 2 K.TMSLQQVINAR.N                                                       |
| HsFLAG-Control_293_Ti_1(  | 3.8786 | 0.3307 | 2822.16 | 2823.14 | 7546.9  | 1     | 649.5                                                 | 30.7 | 1 K.EQIPWTLIDFYDNQPCIDLIEAK.L                                           |
| HsFLAG-Control_293_Ti_1(  | 3.3527 | 0.3285 | 2822.89 | 2823.14 | 7496.8  | 1     | 456.3                                                 | 36.4 | 10 K.EQIPWTLIDFYDNQPCIDLIEAK.L                                          |
| HsFLAG-Control_293_Ti_1(  | 4.5501 | 0.2511 | 1418.32 | 1418.59 | 7813.6  | 1     | 1868.9                                                | 86.4 | 13 K.LGILLDLLEECK.V                                                     |
| HsFLAG-Control_293_Ti_1(  | 2.8274 | 0.2463 | 1299.6  | 1300.45 | 9166.2  | 1     | 828.1                                                 | 65   | 1 K.VEYLSDFLEK.N                                                        |
| HsFLAG-Control_293_Ti_1(  | 3.8103 | 0.2728 | 1300.3  | 1300.45 | 6466.2  | 1     | 1491.6                                                | 85   | 1 K.VEYLSDFLEK.N                                                        |
| HsFLAG-Control_293_Ti_1(  | 3.3274 | 0.2744 | 1736.94 | 1735.94 | 9591.8  | 1     | 1121.5                                                | 65.4 | 1 K.NRDTVYEEQINILK.A                                                    |
| HsFLAG-Control_293_Ti_1(  | 4.0714 | 0.3136 | 1465.37 | 1465.64 | 7588.7  | 1     | 1207.7                                                | 72.7 | 2 R.DTVYEEQINILK.A                                                      |
| Hs283FLP_Ti_106.2540.25   | 4.5589 | 0.2383 | 1418.59 | 1417.6  | 6406.8  | 1     | 1741.8                                                | 90.9 | 7 K.FPLVADLFHDDK.D                                                      |
| HsFLAG-Control_293_Ti_1(  | 3.5956 | 0.234  | 1075.78 | 1076.28 | 9662.3  | 1     | 1513.8                                                | 83.3 | 1 R.AAVVIQAFTR.A                                                        |
| HsFLAG-Control_293_Ti_1(  | 3.7918 | 0.3434 | 1859.06 | 1859.99 | 9143.1  | 1     | 1060.6                                                | 60   | 6 K.ELVHYQQSPGEDTSLR.L                                                  |
| HsFLAG-Control_293_Ti_1(  | 2.7516 | 0.0979 | 2493.33 | 2494.69 | 10736.3 | 7     | 409.7                                                 | 35   | 1 K.EQLNNQILCQSKDEFAQNSVK.E<br>R.RNPSNQSSLESDSNYPISISTSEIGDTEALQQVEEIGL |
| HsFLAG-Control_293_Ti_1(  | 5.2259 | 0.4353 | 4369.94 | 4369.56 | 8724.3  | 1     | 828.3                                                 | 22.4 | 4 EK.A                                                                  |
| HsFLAG-Control_293_Ti_1(  | 4.235  | 0.3935 | 2756.69 | 2757.03 | 4865.8  | 1     | 694.2                                                 | 41.7 | 7 K.KVQAEPPTDIDLDPNADLAYNSLK.R                                          |
| HsFLAG-Control_293_Ti_1(  | 4.445  | 0.2412 | 2756.96 | 2757.03 | 8496.7  | 1     | 1750.2                                                | 38.5 | 3 K.KVQAEPPTDIDLDPNADLAYNSLK.R                                          |
| HsFLAG-Control_293_Ti_1(  | 4.0791 | 0.4035 | 2626.77 | 2628.85 | 4062.8  | 1     | 486.5                                                 | 45.7 | 4 K.VQAEPPTDIDLDPNADLAYNSLK.R                                           |
| HsFLAG-Control_293_Ti_1(  | 3.7355 | 0.4474 | 2858.78 | 2860.07 | 10941.7 | 1     | 817.1                                                 | 36.5 | 4 K.AVADQATQNNSSHGSPDSYSLLLNQLK.L                                       |
| HsFLAG-Control_293_Ti_2(  | 4.1818 | 0.3748 | 2859.77 | 2860.07 | 9747.7  | 1     | 866.3                                                 | 38.5 | 1 K.AVADQATQNNSSHGSPDSYSLLLNQLK.L                                       |
| HsFLAG-Control_293_Ti_1(  | 5.6805 | 0.3483 | 2860.16 | 2860.07 | 7885.3  | 1     | 1534.9                                                | 35.6 | 5 K.AVADQATQNNSSHGSPDSYSLLLNQLK.L                                       |
| HsFLAG-Control_293_Ti_1(  | 3.7798 | 0.2695 | 2473.85 | 2474.73 | 10175.1 | 1     | 686.2                                                 | 42.5 | 2 R.LLEAQLQAQSLEHEEEVEHLK.A                                             |
| HsFLAG-Control_293_Ti_1(  | 4.2861 | 0.3268 | 2473.85 | 2474.73 | 7908.3  | 1     | 1243.5                                                | 40   | 2 R.LLEAQLQAQSLEHEEEVEHLK.A                                             |
| HsFLAG-Control_293_Ti_1(  | 4.0001 | 0.292  | 1731.55 | 1729.89 | 11190.5 | 1     | 2118.3                                                | 70   | 3 K.KAQDLEAAQALQSER.K                                                   |
| HsFLAG-Control_293_Ti_1(  | 5.0703 | 0.3861 | 1601.36 | 1601.71 | 10092.6 | 1     | 2750.1                                                | 82.1 | 2 K.AQDLEAAQALQSER.K                                                    |
| HsFLAG-Control_293_Ti_1(  | 3.7982 | 0.3359 | 1191.81 | 1192.23 | 5896.7  | 2     | 1230.7                                                | 88.9 | 1 R.HADYNTDDLK.V                                                        |
| HsFLAG-Control_293_Ti_1(  | 3.4528 | 0.1451 | 1383.46 | 1383.63 | 6455.4  | 1     | 933.5                                                 | 70.8 | 2 K.VHSLLTSTINGIK.K                                                     |
| HsFLAG-Control_293_Ti_1(  | 3.1579 | 0.2472 | 1383.62 | 1383.63 | 5748    | 1     | 617.9                                                 | 66.7 | 3 K.VHSLLTSTINGIK.K                                                     |
| HsFLAG-Control_293_Ti_1(  | 1.9092 | 0.2085 | 1057.35 | 1058.14 | 3541.7  | 2     | 249.9                                                 | 78.6 | 1 K.NFDLTEYR.Q                                                          |
| HsFLAG-Control_293_Ti_1(  | 5.1365 | 0.4351 | 1889.45 | 1890.23 | 7874.5  | 1     | 1992.7                                                | 76.7 | 6 R.QVLSDSLQIQYQQLIK.I                                                  |
| HsFLAG-Control_293_Ti_1(  | 3.1379 | 0.1949 | 2035.97 | 2037.47 | 6352.4  | 1     | 750.6                                                 | 53.1 | 1 K.QLFYMINAVTLNLLLR.K                                                  |
| HsFLAG-Control_293_Ti_1(  | 4.0757 | 0.2687 | 1451.5  | 1451.62 | 7259.7  | 1     | 1630.5                                                | 85   | 3 R.YNISQLEEWLR.G                                                       |
| HsFLAG-Control_293_Ti_1(  | 2.675  | 0.1762 | 1451.53 | 1451.62 | 4350.3  | 1     | 251.3                                                 | 60   | 1 R.YNISQLEEWLR.G                                                       |
| HsFLAG-Control_293_Ti_1(  | 3.9755 | 0.3459 | 2631.89 | 2633.08 | 8560.7  | 1     | 863.9                                                 | 43.5 | 1 R.NLHQSGAVQTMPLIQAAQLLQLK.K                                           |
| HsFLAG-Control_293_Ti_1(  | 4.8994 | 0.2878 | 2633.04 | 2633.08 | 7126.9  | 1     | 817.3                                                 | 30.4 | 1 R.NLHQSGAVQTMPLIQAAQLLQLK.K                                           |
| HsFLAG-Control_293_Ti_1(  | 4.4345 | 0.4107 | 2482.92 | 2483.66 | 6920.6  | 1     | 1273.2                                                | 52.4 | 9 K.TQEDAEACSLCTSLSTQQIVK.I                                             |
| HsFLAG-Control_293_Ti_1(  | 3.9336 | 0.2947 | 1751.65 | 1751.98 | 5697.5  | 1     | 770.7                                                 | 69.2 | 6 K.ILNLYTPLNEFEER.V                                                    |
| HsFLAG-Control_293_Ti_1(  | 3.6649 | 0.1336 | 1255.08 | 1255.41 | 5723.7  | 1     | 794.6                                                 | 75   | 2 R.NDPQQLLLDAK.H                                                       |
| gij 4758356 ref NF        | 7      | 11     | 0.311   | 380     | 42593   | 8.6 U | flap structure-specific endonuclease 1 [Homo sapiens] |      |                                                                         |
| * HsFLAG-Control_HeLa_NE  | 3.0778 | 0.144  | 1126.37 | 1126.34 | 6180.6  | 1     | 1413.3                                                | 90   | 1 K.LIADVAPSAIR.E                                                       |
| * HsHeLa3_Ti_106.2240.224 | 3.8289 | 0.3417 | 1488.84 | 1488.77 | 6765.9  | 1     | 1219.3                                                | 75   | 1 K.PVYVFDGKPPQLK.S                                                     |
| * HsFLAG-Control_HeLa_NE  | 4.4733 | 0.4182 | 1728.47 | 1728.86 | 7184.4  | 1     | 1758                                                  | 80   | 3 K.QLQQAQAAGAEQEVEK.F                                                  |
| * HsHeLa3_Ti_105.3584.358 | 3.1503 | 0.3773 | 2758.21 | 2758.17 | 3764.7  | 1     | 369.9                                                 | 38   | 1 K.HLLSLMGIPYLDAPSEAEASCAALVK.A                                        |
| * HsHeLa3_Ti_103.3152.315 | 3.0694 | 0.2929 | 2349.25 | 2348.66 | 9806.5  | 1     | 509.2                                                 | 35   | 1 K.VYAAATEDMDCLTFGSPVLMR.H                                             |

|                    |                          |        |        |         |         |        |     |        |      |     |                                                                                       |
|--------------------|--------------------------|--------|--------|---------|---------|--------|-----|--------|------|-----|---------------------------------------------------------------------------------------|
| *                  | HsFLAG-Control_HeLa_NE   | 3.0002 | 0.2754 | 2323.49 | 2323.61 | 7149.3 | 1   | 380.7  | 36.8 | 3   | K.EAHLFLEPEVLDPEVELK.W                                                                |
| *                  | HsHeLa3_Ti_102.1953.195  | 2.9396 | 0.1289 | 1374.76 | 1374.49 | 3557.4 | 5   | 454.4  | 75   | 1   | K.WSEPNEEEELIK.F                                                                      |
| gij 9507215 ref NF |                          | 20     | 418    | 0.31    | 449     | 50094  | 5.1 | U      |      |     | tubulin, alpha 8 [Homo sapiens]                                                       |
|                    | HsFLAG-Control_HeLa_S1(  | 4.2449 | 0.3005 | 2415.72 | 2416.66 | 8163.2 | 1   | 1212.2 | 36.2 | 4   | R.QLFHPEQLITGKEDAANNYAR.G                                                             |
|                    | HsHeLa_Control-MG_Ti_10  | 3.4137 | 0.2652 | 2416.42 | 2416.66 | 7726.4 | 1   | 627.9  | 45   | 8   | R.QLFHPEQLITGKEDAANNYAR.G                                                             |
|                    | HsGST-MOCK_Ti_103.173!   | 4.1081 | 0.2897 | 2416.8  | 2416.66 | 6806.6 | 1   | 1048.6 | 36.2 | 1   | R.QLFHPEQLITGKEDAANNYAR.G                                                             |
|                    | HsFLAG-Control_HeLa_NE   | 3.5321 | 0.3633 | 2417.37 | 2416.66 | 8286.1 | 1   | 502    | 42.5 | 3   | R.QLFHPEQLITGKEDAANNYAR.G                                                             |
|                    | HsFLAG-Control_MG_293_   | 3.4903 | 0.1725 | 1719.53 | 1719.9  | 7713.5 | 1   | 803    | 61.5 | 17  | R.NLDIERPTYTNLNR.L                                                                    |
|                    | HsFLAG-Control_HeLa_S1(  | 4.6066 | 0.4074 | 1488.47 | 1488.77 | 7506.5 | 1   | 1467.1 | 76.9 | 9   | R.LISQIVSSITASLR.F                                                                    |
|                    | HsFLAG-Control_HeLa_S1(  | 4.684  | 0.43   | 1488.49 | 1488.77 | 7157.4 | 1   | 1312.2 | 73.1 | 22  | R.LISQIVSSITASLR.F                                                                    |
|                    | HsHeLa_Control-MG_Ti_20  | 5.0495 | 0.4454 | 1488.53 | 1488.77 | 8030.6 | 1   | 1907.4 | 80.8 | 39  | R.LISQIVSSITASLR.F                                                                    |
|                    | HsFLAG-Control_HeLa_S1(  | 4.722  | 0.3946 | 1488.57 | 1488.77 | 8151.1 | 1   | 1172.8 | 69.2 | 9   | R.LISQIVSSITASLR.F                                                                    |
|                    | HsFLAG-Control_HeLa_S1(  | 4.3035 | 0.346  | 1488.75 | 1488.77 | 5615.6 | 1   | 1324.7 | 55.8 | 2   | R.LISQIVSSITASLR.F                                                                    |
|                    | HsFLAG-Control_HeLa_S1(  | 4.1471 | 0.2471 | 1489.29 | 1488.77 | 5256.5 | 3   | 867.3  | 50   | 2   | R.LISQIVSSITASLR.F                                                                    |
|                    | HsFLAG-Control_HeLa_NE   | 4.6049 | 0.3537 | 1489.3  | 1488.77 | 6361.1 | 1   | 1211.5 | 73.1 | 15  | R.LISQIVSSITASLR.F                                                                    |
|                    | HsFLAG-Control_HeLa_NE   | 4.3453 | 0.2295 | 1489.54 | 1488.77 | 5799.3 | 1   | 1231.8 | 53.8 | 2   | R.LISQIVSSITASLR.F                                                                    |
|                    | HsFLAG-Control_HeLa_S1(  | 3.7596 | 0.3173 | 1490.02 | 1488.77 | 5380.1 | 1   | 894.9  | 50   | 1   | R.LISQIVSSITASLR.F                                                                    |
|                    | HsFLAG-Control_HeLa_NE   | 5.8208 | 0.383  | 2410.89 | 2410.69 | 6224.2 | 1   | 1491.8 | 62.5 | 149 | R.FDGALNVDLTEFQTNLVPYPR.I                                                             |
|                    | HsHeLa_Control-MG_Ti_20  | 3.7919 | 0.422  | 1755.69 | 1755.98 | 6153.4 | 1   | 806.5  | 65.4 | 7   | K.RTIQFVDWCPTGFK.V                                                                    |
|                    | HsFLAG-Control_HeLa_S1(  | 4.5938 | 0.4395 | 1599.28 | 1599.79 | 7004.1 | 1   | 1203.6 | 75   | 4   | R.TIQFVDWCPTGFK.V                                                                     |
|                    | HsHeLa-FLAG-IP_S100_Ti_  | 4.1491 | 0.409  | 1825.53 | 1826.1  | 3764.8 | 1   | 755.9  | 64.7 | 121 | K.VGINYQPPTVVPGGDLAK.V                                                                |
|                    | HsF-IP-293-MG_Ti_104.26! | 2.8488 | 0.3461 | 1865.28 | 1866.11 | 9656.2 | 1   | 1217.8 | 59.4 | 2   | R.AVCMLSNTTAIAEAWAR.L                                                                 |
|                    | HsGST-MOCK_Ti_404.302!   | 2.6983 | 0.1597 | 2332.29 | 2331.52 | 9294.4 | 1   | 579.2  | 42.1 | 1   | R.AFVHWYVGEEMEEGFSEAR.E                                                               |
| gij 13489099 ref N |                          | 4      | 14     | 0.31    | 290     | 32494  | 4.8 | U      |      |     | potassium channel tetramerisation domain containing 17 [Homo sapiens]                 |
| *                  | HsFLAG-Control_293_Ti_2( | 5.1167 | 0.4883 | 2397.14 | 2396.67 | 7510.9 | 1   | 1236.9 | 52.5 | 3   | K.DMAEEGVLEEAFFYNIGPLIR.I                                                             |
| *                  | HsFLAG-Control_293_Ti_2( | 5.2202 | 0.5072 | 2527.35 | 2528.78 | 6812.4 | 1   | 1301   | 57.5 | 2   | R.VLQCQEEELTQMVSTMSDGWR.F                                                             |
| *                  | HsFLAG-Control_293_Ti_2( | 2.937  | 0.2826 | 1601.46 | 1601.67 | 5481.3 | 4   | 352.1  | 46.4 | 2   | K.ELHSTPNGLSSESSR.K                                                                   |
| *                  | HsFLAG-Control_293_Ti_2( | 7.6093 | 0.4459 | 3902.56 | 3905    | 9341.3 | 1   | 1797.7 | 30.5 | 7   | K.STEEQLEEQQQEEEEVEVEVEQVQVEADAQEK.G                                                  |
| gij 4506005 ref NF |                          | 7      | 11     | 0.309   | 327     | 37187  | 6.2 | U      |      |     | protein phosphatase 1, catalytic subunit, beta isoform 1 [Homo sapiens]               |
| gij 46249376 ref N |                          | 7      | 11     | 0.309   | 327     | 37187  | 6.2 | U      |      |     | protein phosphatase 1, catalytic subunit, beta isoform 1 [Homo sapiens]               |
|                    | HsHeLa3_Ti_106.2992.299  | 4.6683 | 0.3871 | 2198.1  | 2197.62 | 7004.8 | 1   | 1387.3 | 63.9 | 1   | K.SREIFLSQPILLELEAPLK.I                                                               |
|                    | HsFLAG-Control_HeLa_NE   | 4.2579 | 0.3786 | 1954.03 | 1954.36 | 4463.2 | 1   | 777.4  | 65.6 | 3   | R.EIFLSQPILLELEAPLK.I                                                                 |
|                    | HsHeLa3_Ti_103.4158.415  | 3.0674 | 0.2613 | 2583.37 | 2583.86 | 4462.4 | 2   | 247.8  | 38.1 | 1   | R.LFEYGGFPPEANYLFLGDYVDR.G                                                            |
|                    | HsHeLa3_Ti_104.2893.289  | 3.2713 | 0.3242 | 1199.72 | 1199.4  | 5387.2 | 1   | 846.3  | 87.5 | 2   | K.YPENFFLLR.G                                                                         |
|                    | HsGST-MOCK_Ti_302.394!   | 4.6892 | 0.3549 | 2116.37 | 2115.32 | 6732.6 | 1   | 1086.5 | 61.8 | 2   | K.TFTDCFNCLPIAAIVDEK.I                                                                |
|                    | HsHeLa3_Ti_106.2355.235  | 3.9058 | 0.2397 | 2249.87 | 2249.48 | 6344.4 | 1   | 712    | 52.8 | 1   | K.IFCCHGGLSPDLQSMQIR.R                                                                |
|                    | HsHeLa3_Ti_104.2112.211  | 3.636  | 0.3626 | 1640.78 | 1640.79 | 5993.4 | 1   | 991.5  | 65.4 | 1   | R.AHQVVEDGYEFFAK.R                                                                    |
| gij 63029937 ref N |                          | 40     | 229    | 0.307   | 854     | 98113  | 5.2 | U      |      |     | heat shock protein 90kDa alpha (cytosolic), class A member 1 isoform 1 [Homo sapiens] |
|                    | HsFLAG-Control_HeLa_S1(  | 2.4492 | 0.1648 | 1291.51 | 1292.39 | 4628.6 | 1   | 302.8  | 59.1 | 1   | R.ELISNSSDALDK.I                                                                      |
|                    | HsFLAG-Control_HeLa_S1(  | 3.2785 | 0.2502 | 1292.15 | 1292.39 | 6546.2 | 1   | 726.9  | 68.2 | 10  | R.ELISNSSDALDK.I                                                                      |
|                    | HsFLAG-Control_HeLa_S1(  | 3.3867 | 0.2554 | 1292.42 | 1292.39 | 5189   | 5   | 656.4  | 68.2 | 3   | R.ELISNSSDALDK.I                                                                      |
|                    | HsFLAG-Control_HeLa_S1(  | 2.678  | 0.2106 | 1039.44 | 1040.12 | 6287.3 | 3   | 663.1  | 75   | 4   | R.YESLTDPSK.L                                                                         |
|                    | HsFLAG-Control_HeLa_NE   | 2.7149 | 0.2011 | 1039.45 | 1040.12 | 6815.8 | 1   | 815.2  | 81.2 | 4   | R.YESLTDPSK.L                                                                         |
|                    | HsFLAG-Control_HeLa_NE   | 3.4808 | 0.2474 | 1040.52 | 1040.12 | 3725.7 | 4   | 589.2  | 87.5 | 2   | R.YESLTDPSK.L                                                                         |
|                    | HsFLAG-Control_HeLa_S1(  | 3.2975 | 0.1427 | 1192.37 | 1191.42 | 7693.8 | 3   | 1304.4 | 88.9 | 6   | R.ELHINLIPNK.Q                                                                        |
|                    | HsFLAG-Control_HeLa_NE   | 4.4034 | 0.1007 | 1243.05 | 1243.45 | 5205.6 | 1   | 1215   | 86.4 | 20  | K.ADLINNLGTIAK.S                                                                      |
|                    | HsFLAG-Control_HeLa_S1(  | 5.634  | 0.452  | 2257.72 | 2257.29 | 8942.2 | 1   | 2330.1 | 65.8 | 16  | K.HNDDEQYAWESSAGGSFTVR.T                                                              |
|                    | HsFLAG-Control_HeLa_S1(  | 3.3042 | 0.2832 | 1312.18 | 1312.33 | 6777.7 | 1   | 777.6  | 77.8 | 15  | K.EDQTEYLEER.R                                                                        |
|                    | HsFLAG-Control_HeLa_S1(  | 3.9401 | 0.3021 | 1779.66 | 1780.08 | 5732.9 | 1   | 1407.9 | 51.8 | 1   | K.HSQFIGYPITLFVEK.E                                                                   |

|                          |        |        |         |         |        |       |        |      |                                                             |
|--------------------------|--------|--------|---------|---------|--------|-------|--------|------|-------------------------------------------------------------|
| HsFLAG-Control_HeLa_S1(  | 4.6022 | 0.3566 | 1780.14 | 1780.08 | 7627   | 1     | 1659.1 | 75   | 6 K.HSQFIGYPITLFVEK.E                                       |
| HsFLAG-Control_HeLa_S1(  | 5.013  | 0.4458 | 1780.42 | 1780.08 | 6666.5 | 1     | 1717.5 | 82.1 | 8 K.HSQFIGYPITLFVEK.E                                       |
| HsFLAG-Control_HeLa_S1(  | 3.5901 | 0.1509 | 1151.58 | 1152.25 | 8718.8 | 6     | 968.9  | 75   | 4 K.YIDQEELNK.T                                             |
| HsFLAG-Control_HeLa_S1(  | 5.4991 | 0.3687 | 1834.65 | 1834.89 | 6758.2 | 1     | 2036.9 | 85.7 | 32 R.NPDDITNEEYGEFYK.S                                      |
| HsFLAG-Control_HeLa_NE   | 4.7198 | 0.3685 | 1528.53 | 1528.66 | 7778.9 | 1     | 1591.3 | 79.2 | 15 K.SLTNDWEDHLAVK.H                                        |
| HsFLAG-Control_HeLa_S1(  | 3.1275 | 0.2534 | 1349.94 | 1349.49 | 5003.1 | 1     | 677    | 75   | 4 K.HFSVEGQLEFR.A                                           |
| HsFLAG-Control_HeLa_NE   | 3.7466 | 0.2381 | 1264.71 | 1265.41 | 6070.2 | 1     | 1041.7 | 83.3 | 10 R.RAPFDLFENR.K                                           |
| HsFLAG-Control_HeLa_NE   | 2.4384 | 0.1143 | 948.48  | 949.051 | 8413.3 | 8     | 681.8  | 75   | 1 K.FYEQFSK.N                                               |
| HsFLAG-Control_HeLa_S1(  | 2.5696 | 0.1448 | 1168.59 | 1169.24 | 5147.3 | 2     | 436.5  | 66.7 | 3 K.LGIHEDSQNR.K                                            |
| HsFLAG-Control_HeLa_NE   | 2.8368 | 0.2315 | 1169.2  | 1169.24 | 6356.4 | 7     | 602.8  | 66.7 | 3 K.LGIHEDSQNR.K                                            |
| HsFLAG-Control_HeLa_S1(  | 2.8613 | 0.2441 | 1169.35 | 1169.24 | 6648.7 | 1     | 820.8  | 72.2 | 5 K.LGIHEDSQNR.K                                            |
| HsFLAG-Control_HeLa_NE   | 2.6665 | 0.1841 | 1297.57 | 1297.41 | 8151.2 | 1     | 940.5  | 70   | 1 K.LGIHEDSQNRK.K                                           |
| HsFLAG-Control_HeLa_S1(  | 3.73   | 0.4072 | 1551.39 | 1551.71 | 7872.1 | 1     | 1334.4 | 73.1 | 1 R.YYTSASGDEMVSJK.D                                        |
| HsFLAG-Control_HeLa_NE   | 3.403  | 0.3361 | 1224.51 | 1225.39 | 6426   | 2     | 721.8  | 66.7 | 5 K.HIYYITGETK.D                                            |
| HsFLAG-Control_HeLa_S1(  | 3.2831 | 0.3573 | 1224.53 | 1225.39 | 6930.1 | 1     | 843.9  | 72.2 | 6 K.HIYYITGETK.D                                            |
| Hs283FLP_Ti_105.1393.13  | 3.1232 | 0.3785 | 1224.58 | 1225.39 | 5786.9 | 1     | 754.6  | 72.2 | 2 K.HIYYITGETK.D                                            |
| HsFLAG-Control_HeLa_S1(  | 3.2689 | 0.4124 | 1224.59 | 1225.39 | 6192.5 | 1     | 931.4  | 77.8 | 1 K.HIYYITGETK.D                                            |
| HsFLAG-Control_HeLa_S1(  | 3.3338 | 0.3832 | 1224.82 | 1225.39 | 3650.2 | 1     | 668.6  | 77.8 | 1 K.HIYYITGETK.D                                            |
| HsFLAG-Control_HeLa_NE   | 3.3596 | 0.3489 | 1225.24 | 1225.39 | 3715.7 | 1     | 927.2  | 88.9 | 4 K.HIYYITGETK.D                                            |
| HsFLAG-Control_HeLa_S1(  | 3.247  | 0.3207 | 1225.56 | 1225.39 | 3672.2 | 1     | 869.1  | 88.9 | 1 K.HIYYITGETK.D                                            |
| HsFLAG-Control_HeLa_S1(  | 3.7466 | 0.3254 | 1236.22 | 1236.33 | 7080.7 | 2     | 1140   | 80   | 13 K.DQVANSAFVER.L                                          |
| HsFLAG-Control_HeLa_S1(  | 2.5834 | 0.3358 | 1416.47 | 1417.47 | 3338.4 | 1     | 318    | 63.6 | 2 K.EGLELPEDEEEK.K                                          |
| HsFLAG-Control_HeLa_NE   | 2.8612 | 0.171  | 1417.26 | 1417.47 | 2994.8 | 7     | 388    | 68.2 | 6 K.EGLELPEDEEEK.K                                          |
| HsFLAG-MOCK_300mM_T      | 2.8099 | 0.2341 | 1167.72 | 1168.35 | 4413.6 | 1     | 487.2  | 75   | 2 K.KTKFENLCK.I                                             |
| HsFLAG-MOCK_300mM_T      | 2.911  | 0.2179 | 1168.94 | 1168.35 | 5882.8 | 1     | 1050.9 | 87.5 | 2 K.KTKFENLCK.I                                             |
| HsFLAG-Control_HeLa_S1(  | 4.3051 | 0.3302 | 1787.57 | 1788.01 | 9266.6 | 1     | 2131.5 | 51.8 | 1 K.HLEINPDHSIETLR.Q                                        |
| HsFLAG-Control_HeLa_NE   | 4.5439 | 0.4176 | 1789.92 | 1788.01 | 6445.5 | 1     | 1222.4 | 71.4 | 4 K.HLEINPDHSIETLR.Q                                        |
| HsFLAG-Control_HeLa_S1(  | 4.5087 | 0.3244 | 3003.82 | 3004.37 | 8897.8 | 1     | 1496.7 | 30.8 | 3 K.DLVILLYETALLSSGFSLEDPQTHANR.I                           |
| HsFLAG-Control_HeLa_S1(  | 4.0636 | 0.3203 | 3004.79 | 3004.37 | 7082.1 | 1     | 715.8  | 38.5 | 1 K.DLVILLYETALLSSGFSLEDPQTHANR.I                           |
| gi 4827071 ref NF        | 4      | 11     | 0.305   | 177     | 19463  | 7.7 U |        |      | zinc finger protein 9 [Homo sapiens]                        |
| * HsFLAG-MOCK_150mM_T    | 4.0835 | 0.3929 | 1776.53 | 1776.95 | 4965.5 | 1     | 1137.7 | 75   | 3 R.GFQFVSSSLPDICYR.C                                       |
| * HsFLAG-MOCK_150mM_T    | 4.4738 | 0.4289 | 1777.29 | 1776.71 | 7424.1 | 1     | 2314.1 | 80.8 | 1 K.DCDLQEDACYNCGR.G                                        |
| * HsFLAG-MOCK_150mM_T    | 4.0251 | 0.3622 | 1486.51 | 1486.56 | 8543.7 | 1     | 1407.1 | 77.3 | 2 K.CYSCGEFGHIQK.D                                          |
| * HsFLAG-MOCK_150mM_T    | 4.5357 | 0.4368 | 1433.96 | 1433.49 | 7047.3 | 1     | 1296.2 | 75   | 5 R.CGETGHVAINCSK.T                                         |
| gi 4826860 ref NF        | 2      | 4      | 0.305   | 128     | 14174  | 8.5 U |        |      | NHP2 non-histone chromosome protein 2-like 1 [Homo sapiens] |
| gi 51317376 ref NF       | 2      | 4      | 0.305   | 128     | 14174  | 8.5 U |        |      | NHP2 non-histone chromosome protein 2-like 1 [Homo sapiens] |
| HsFLAG-Control_HeLa_NE   | 2.638  | 0.2628 | 1200.4  | 1200.38 | 4105.2 | 1     | 567.7  | 80   | 1 K.AYPLADAHLT.K                                            |
| HsFLAG-MOCK_300mM_T      | 4.4606 | 0.202  | 3141.39 | 3138.65 | 6294   | 1     | 918.3  | 29.6 | 3 R.GISEFIVMAADAEPLEIILHLPLLCEDK.N                          |
| gi 31542947 ref NF       | 10     | 38     | 0.304   | 573     | 61055  | 5.9 U |        |      | chaperonin [Homo sapiens]                                   |
| gi 41399285 ref NF       | 10     | 38     | 0.304   | 573     | 61055  | 5.9 U |        |      | chaperonin [Homo sapiens]                                   |
| HsFLAG-MOCK_300mM_T      | 5.7423 | 0.3515 | 2115.75 | 2114.57 | 8543.1 | 1     | 2266.7 | 45   | 1 R.ALMLQGVDLLADAVAVTMGPK.G                                 |
| HsFLAG-Control_HeLa_NE   | 5.3575 | 0.4769 | 2560.34 | 2561.72 | 7694   | 1     | 1034.5 | 47.9 | 5 K.LVQDVANNTNEEAGDGTTTATVLAR.S                             |
| HsFLAG-Control_HeLa_NE   | 2.915  | 0.2935 | 2041.92 | 2042.25 | 8372.4 | 1     | 685.1  | 50   | 1 K.PVTTPEEIAQVATISANGDK.E                                  |
| Hs293FLP_TREX_Ti_102.2   | 3.3907 | 0.3559 | 1390.23 | 1390.58 | 4072.4 | 1     | 1090.3 | 81.8 | 2 R.GYISPYFINTSK.G                                          |
| HsFLAG-Control_293_Ti_2( | 2.7786 | 0.1954 | 1605.27 | 1602.75 | 6264.6 | 1     | 338.6  | 54.2 | 1 K.CEFQDAYVLLSEK.K                                         |
| HsHeLa_Control-MG_Ti_20  | 4.209  | 0.31   | 2049.14 | 2048.39 | 6268.8 | 1     | 796.3  | 52.8 | 1 K.KISSIQSIVPALEIANAHR.K                                   |
| HsFLAG-Control_HeLa_NE   | 2.2193 | 0.1673 | 844.51  | 845.027 | 7946.7 | 7     | 620.6  | 71.4 | 3 K.VGEVIVTK.D                                              |
| HsFLAG-Control_HeLa_NE   | 3.4295 | 0.3174 | 1234.26 | 1234.31 | 8156.8 | 1     | 1020.2 | 72.7 | 3 K.VGGTSDVEVNEK.K                                          |
| HsFLAG-Control_HeLa_NE   | 2.6929 | 0.245  | 1772.26 | 1772.92 | 7382.7 | 1     | 675.9  | 56.7 | 2 R.CIPALDSLTPANEDQK.I                                      |

|                   |                          |        |        |         |         |         |      |        |      |    |                                                                                         |
|-------------------|--------------------------|--------|--------|---------|---------|---------|------|--------|------|----|-----------------------------------------------------------------------------------------|
|                   | HsFLAG-Control_HeLa_NE   | 6.0057 | 0.3814 | 2870.06 | 2870.31 | 7241.4  | 1    | 1924   | 38.9 | 19 | R.TALLDAAGVASLLTTAEVVVTEIPKEEK.D                                                        |
| gi 4504897 ref NF |                          | 11     | 33     | 0.302   | 529     | 57862   | 5.4  | U      |      |    | karyopherin alpha 2 [Homo sapiens]                                                      |
| gi 89042174 ref X |                          | 11     | 33     | 0.302   | 529     | 57862   | 5.4  | U      |      |    | PREDICTED: similar to Importin alpha-2 subunit (Karyopherin alpha-2 subunit) (SRP1-alp  |
| gi 89042170 ref X |                          | 11     | 33     | 0.302   | 529     | 57862   | 5.4  | U      |      |    | PREDICTED: similar to Importin alpha-2 subunit (Karyopherin alpha-2 subunit) (SRP1-alp  |
|                   | Hs293FLP-MG_Ti_302.159   | 4.0965 | 0.4024 | 1878.34 | 1877.96 | 4415.8  | 1    | 763.4  | 65.6 | 2  | R.NVSSFPDDATSPLQENR.N                                                                   |
|                   | Hs293FLP-MG_Ti_303.187   | 4.108  | 0.3001 | 1690.97 | 1689.82 | 5974.2  | 1    | 1090.4 | 71.4 | 3  | R.NNQGTVNWSVDDIVK.G                                                                     |
|                   | Hs293FLP-MG_Ti_302.151   | 4.6149 | 0.4105 | 1900.8  | 1902.03 | 7951.6  | 1    | 1828.8 | 67.6 | 3  | K.GINSSNVENQLQATQAAR.K                                                                  |
|                   | Hs293FLP-MG_Ti_305.280   | 3.421  | 0.3744 | 2842.61 | 2844.03 | 7110    | 1    | 899.8  | 40   | 5  | R.TDCSPIQFESAWALTNIASGTSEQTK.A                                                          |
|                   | Hs293FLP-MG_Ti_306.291   | 5.4679 | 0.1826 | 1943.55 | 1944.28 | 6190.6  | 1    | 1683.2 | 50   | 2  | K.NPAPPIDAVEQILPTLVR.L                                                                  |
|                   | HsFLAG-Control_HeLa_S10  | 3.2688 | 0.3874 | 1944.32 | 1944.28 | 5818.7  | 1    | 531.1  | 50   | 2  | K.NPAPPIDAVEQILPTLVR.L                                                                  |
|                   | Hs293FLP-MG_Ti_306.266   | 2.7796 | 0.2547 | 1549.58 | 1550.88 | 4762.3  | 1    | 342.7  | 57.1 | 2  | K.LLGASELPIVTPALR.A                                                                     |
|                   | HsFLAG-Control_HeLa_NE   | 3.8492 | 0.2303 | 1550.75 | 1550.88 | 4988.1  | 3    | 617.5  | 60.7 | 4  | K.LLGASELPIVTPALR.A                                                                     |
|                   | Hs293FLP-MG_Ti_306.266   | 3.9873 | 0.3009 | 1551.72 | 1550.88 | 4100.6  | 1    | 675.5  | 67.9 | 4  | K.LLGASELPIVTPALR.A                                                                     |
|                   | HsFLAG-Control_HeLa_S10  | 4.7065 | 0.2881 | 3355.83 | 3354.83 | 7409.4  | 1    | 894.6  | 27.3 | 2  | R.AIGNIVTGTDEQTQVVIDAGALAVFPSLLTNP.K                                                    |
|                   | HsFLAG-Control_HeLa_S10  | 5.1557 | 0.4961 | 1971.72 | 1972.38 | 9575.3  | 1    | 2769.4 | 73.5 | 4  | K.IILVILDAISNIFQAAEK.L                                                                  |
| gi 34147540 ref N |                          | 4      | 7      | 0.3     | 140     | 14564   | 8.5  | U      |      |    | hypothetical protein LOC114984 [Homo sapiens]                                           |
| *                 | HsHeLa3_Ti_105.1530.153  | 3.5574 | 0.293  | 1932.91 | 1933.17 | 4046.7  | 1    | 705.7  | 55.6 | 2  | K.ASQEPSKPGTEVIPAAPR.K                                                                  |
| *                 | HsHeLa3_Ti_106.1936.193  | 2.8558 | 0.2311 | 1263.67 | 1264.43 | 5897.9  | 4    | 368.5  | 60   | 1  | K.ALLQTHPEAQR.A                                                                         |
| *                 | HsHeLa3_Ti_106.1934.193  | 3.0039 | 0.2284 | 1264.66 | 1264.43 | 4956.1  | 1    | 693.2  | 75   | 2  | K.ALLQTHPEAQR.A                                                                         |
| *                 | HsHeLa3_Ti_102.1289.128  | 3.309  | 0.2616 | 1311.61 | 1311.43 | 3631.2  | 1    | 668.5  | 77.3 | 2  | R.AIEAAPQEPEQK.R                                                                        |
| gi 41151097 ref X |                          | 4      | 10     | 0.299   | 214     | 24627   | 10.1 | U      |      |    | PREDICTED: similar to ribosomal protein L10 isoform 1 [Homo sapiens]                    |
| gi 89057215 ref X |                          | 4      | 10     | 0.299   | 214     | 24627   | 10.1 | U      |      |    | PREDICTED: similar to ribosomal protein L10 isoform 4 [Homo sapiens]                    |
| gi 89057211 ref X |                          | 4      | 10     | 0.299   | 214     | 24627   | 10.1 | U      |      |    | PREDICTED: similar to ribosomal protein L10 isoform 1 [Homo sapiens]                    |
| gi 89052350 ref X |                          | 4      | 10     | 0.299   | 214     | 24627   | 10.1 | U      |      |    | PREDICTED: similar to ribosomal protein L10 isoform 4 [Homo sapiens]                    |
| gi 5174431 ref NF |                          | 4      | 10     | 0.299   | 214     | 24577   | 10.1 | U      |      |    | ribosomal protein L10 [Homo sapiens]                                                    |
|                   | HsGST-MOCK_Ti_102.273    | 6.5622 | 0.5053 | 3282.16 | 3283.56 | 8243.1  | 1    | 2573.8 | 39.3 | 1  | K.AKVDEFPLCGHMVSDEYEQLSSEALEAAR.I                                                       |
|                   | HsF-IP-293-MG_Ti_106.186 | 2.155  | 0.1527 | 1188.66 | 1189.36 | 3924.9  | 6    | 197    | 59.1 | 1  | R.GAFGKPGQTVAR.V                                                                        |
|                   | HsF-IP-293-MG_Ti_102.230 | 3.6793 | 0.1568 | 1546.36 | 1545.66 | 6663.1  | 2    | 1880.3 | 83.3 | 2  | K.FNADEFEDMVAEK.R                                                                       |
|                   | HsGST-MOCK_Ti_102.139    | 3.4877 | 0.2356 | 1115.55 | 1115.28 | 4787.3  | 1    | 958.4  | 83.3 | 6  | K.RLIPDGCQVK.Y                                                                          |
| gi 24307939 ref N |                          | 9      | 44     | 0.298   | 541     | 59671   | 5.6  | U      |      |    | chaperonin containing TCP1, subunit 5 (epsilon) [Homo sapiens]                          |
| *                 | HsFLAG-Control_293_Ti_10 | 3.6907 | 0.248  | 3115.1  | 3115.38 | 7439.5  | 1    | 540.6  | 31   | 2  | K.SQDDEIGDGTGVVVLGALLEEAEQLLDR.G                                                        |
| *                 | HsHeLa_Control-MG_Ti_20  | 5.3369 | 0.4713 | 3116.94 | 3115.38 | 5386.4  | 1    | 909.2  | 32.8 | 8  | K.SQDDEIGDGTGVVVLGALLEEAEQLLDR.G                                                        |
| *                 | HsFLAG-Control_HeLa_NE   | 4.1096 | 0.3957 | 2186.04 | 2186.51 | 7983    | 1    | 702.7  | 44.7 | 4  | K.ISDSVLVDIKDTEPLIQTAK.T                                                                |
| *                 | HsFLAG-Control_HeLa_S10  | 3.8651 | 0.3445 | 1611.35 | 1611.93 | 7708.9  | 1    | 945    | 61.5 | 5  | K.IAILTCPFPPKPK.T                                                                       |
| *                 | HsHeLa_Control-MG_Ti_20  | 4.0692 | 0.4256 | 1434.4  | 1434.59 | 6931.6  | 1    | 1408.8 | 81.8 | 2  | K.HKLDVTSVEDYK.A                                                                        |
| *                 | HsFLAG-Control_HeLa_S10  | 3.961  | 0.2203 | 3382.49 | 3381.7  | 7874.5  | 2    | 529.5  | 23.3 | 1  | K.ETGANLAICQWGFDDDEANHLLQNNLPAVR.W                                                      |
| *                 | HsHeLa_Control-MG_Ti_20  | 2.6364 | 0.2309 | 1739.59 | 1740.01 | 9012.4  | 1    | 727.4  | 53.1 | 1  | R.WVGGPEIELIAIATGGR.I                                                                   |
| *                 | HsFLAG-Control_HeLa_S10  | 5.3166 | 0.3031 | 1668.45 | 1668.93 | 8272    | 1    | 1989.9 | 73.3 | 20 | K.LGFAGLVQEISFGTTK.D                                                                    |
| *                 | HsFLAG-Control_HeLa_S10  | 4.6295 | 0.5095 | 2195.19 | 2196.39 | 9521.4  | 1    | 1939.7 | 57.1 | 1  | R.VVYGGGAAEISCALAVSQEADK.C                                                              |
| gi 21735625 ref N |                          | 6      | 18     | 0.298   | 245     | 27745   | 4.8  | U      |      |    | tyrosine 3/tryptophan 5 -monooxygenase activation protein, zeta polypeptide [Homo sapie |
| gi 4507953 ref NF |                          | 6      | 18     | 0.298   | 245     | 27745   | 4.8  | U      |      |    | tyrosine 3/tryptophan 5 -monooxygenase activation protein, zeta polypeptide [Homo sapie |
|                   | HsHeLa3_Ti_102.1435.143  | 2.7583 | 0.2969 | 1548.62 | 1549.59 | 3559.8  | 1    | 213.6  | 50   | 1  | K.SVTEQGAELSNEER.N                                                                      |
|                   | HsHeLa3_Ti_102.1431.143  | 4.2821 | 0.3336 | 1549.69 | 1549.59 | 7395.9  | 1    | 1521.3 | 73.1 | 5  | K.SVTEQGAELSNEER.N                                                                      |
|                   | HsFLAG-MOCK_300mM_T      | 3.2778 | 0.422  | 2439.22 | 2438.65 | 8500    | 1    | 723.2  | 42.9 | 1  | K.SVTEQGAELSNEERNLLSVAYK.N                                                              |
|                   | HsFLAG-MOCK_300mM_T      | 3.4045 | 0.2878 | 1505.62 | 1505.67 | 6944.9  | 1    | 1332.9 | 69.2 | 2  | R.VVSSIEQKTEGAEK.K                                                                      |
|                   | HsFLAG-Control_HeLa_S10  | 3.9585 | 0.294  | 2041.03 | 2042.21 | 10559.1 | 1    | 1559.9 | 58.8 | 1  | K.GIVDQSQQAYQEAFAEISK.K                                                                 |
|                   | HsFLAG-Control_HeLa_NE   | 4.8185 | 0.429  | 2133.81 | 2133.27 | 6873.5  | 1    | 1374.3 | 63.9 | 8  | K.TAFDEAIAELDTLSEESYK.D                                                                 |
| gi 34147630 ref N |                          | 13     | 51     | 0.297   | 455     | 49875   | 7.6  | U      |      |    | Tu translation elongation factor, mitochondrial [Homo sapiens]                          |
| *                 | HsHeLa_Control-MG_Ti_20  | 3.5039 | 0.4202 | 1810.39 | 1811.01 | 6607.1  | 1    | 1224.2 | 68.8 | 1  | R.DKPHVNVGTIGHVDHGK.T                                                                   |

|                    |                          |        |        |         |         |         |     |        |                                 |    |                                      |
|--------------------|--------------------------|--------|--------|---------|---------|---------|-----|--------|---------------------------------|----|--------------------------------------|
| *                  | Hs293FLP_Ti_302.1308.13  | 3.8038 | 0.2962 | 1495.01 | 1493.57 | 7842.9  | 1   | 1569.9 | 81.8                            | 4  | K.KYEEIDNAPEER.A                     |
| *                  | HsHeLa_Control-MG_Ti_20  | 4.8924 | 0.4745 | 1674.36 | 1674.85 | 7870.2  | 1   | 1702.9 | 73.3                            | 3  | R.GITINAAHVEYSTAAR.H                 |
| *                  | HsGST-MOCK_Ti_406.228:   | 2.6155 | 0.0936 | 1770.24 | 1771.85 | 10711.7 | 5   | 692.9  | 50                              | 1  | R.HYAHTDCPGHADYVK.N                  |
| *                  | HsHeLa_Control-MG_Ti_20  | 4.0632 | 0.421  | 1771.34 | 1771.85 | 8511.3  | 1   | 1376   | 75                              | 3  | R.HYAHTDCPGHADYVK.N                  |
| *                  | HsGST-MOCK_Ti_104.129:   | 4.2042 | 0.3084 | 1771.6  | 1771.85 | 8142.1  | 1   | 2990.9 | 58.9                            | 2  | R.HYAHTDCPGHADYVK.N                  |
| *                  | Hs293FLP-MG_Ti_203.436:  | 3.9538 | 0.2669 | 2939.74 | 2940.29 | 5591.8  | 1   | 611.4  | 28.8                            | 3  | R.ELLTEFGYKGEETPVIVGSALCALEGR.D      |
| *                  | Hs293FLP-MG_Ti_203.474:  | 4.9575 | 0.3622 | 3692.69 | 3693.15 | 6799.1  | 1   | 572.4  | 24.2                            | 6  | R.ELLTEFGYKGEETPVIVGSALCALEGRDPGLK.S |
| *                  | Hs293FLP-MG_Ti_202.312:  | 2.1516 | 0.22   | 1542.63 | 1543.8  | 3896.1  | 1   | 467.3  | 57.7                            | 1  | K.LLDAVDTYIPVPAR.D                   |
| *                  | Hs293FLP-MG_Ti_202.313:  | 4.161  | 0.3099 | 1542.71 | 1543.8  | 6319.7  | 1   | 1658.6 | 80.8                            | 4  | K.LLDAVDTYIPVPAR.D                   |
| *                  | HsHeLa_Control-MG_Ti_20  | 4.2046 | 0.3442 | 1543.66 | 1543.8  | 5543.3  | 1   | 1360.5 | 76.9                            | 8  | K.LLDAVDTYIPVPAR.D                   |
| *                  | HsFLAG-Control_293_Ti_20 | 4.8842 | 0.3629 | 1644.64 | 1644.95 | 3916.1  | 1   | 1098.5 | 78.6                            | 12 | K.PFLLPVEAVYSVPGR.G                  |
| *                  | Hs293FLP-MG_Ti_204.141:  | 3.5572 | 0.2081 | 1373.3  | 1373.47 | 8693.2  | 1   | 1454.9 | 77.3                            | 3  | K.KGDECELLGHSK.N                     |
| gij 50592996 ref N |                          | 38     | 352    | 0.296   | 450     | 50433   | 4.9 | U      | tubulin, beta, 4 [Homo sapiens] |    |                                      |
|                    | HsF-IP-293-MG_Ti_102.23: | 4.2116 | 0.3257 | 1617.72 | 1616.87 | 4090.1  | 1   | 901.5  | 75                              | 15 | R.AILVDLEPGTMDSVR.S                  |
|                    | HsGST-MOCK_Ti_102.286:   | 3.2049 | 0.3313 | 1958.45 | 1960.15 | 8017.5  | 1   | 762.8  | 52.9                            | 1  | K.GHYTEGAELVDSVLDVVR.K               |
|                    | HsFLAG-Control_HeLa_S10  | 4.1642 | 0.2955 | 1959.3  | 1960.15 | 8544.6  | 2   | 1215.8 | 38.2                            | 2  | K.GHYTEGAELVDSVLDVVR.K               |
|                    | HsGST-MOCK_Ti_403.395:   | 4.7164 | 0.3422 | 1959.33 | 1960.15 | 10548.9 | 1   | 1301.9 | 55.9                            | 1  | K.GHYTEGAELVDSVLDVVR.K               |
|                    | HsFLAG-Control_HeLa_NE   | 5.3562 | 0.4242 | 1959.63 | 1960.15 | 11243.1 | 1   | 2825.8 | 70.6                            | 3  | K.GHYTEGAELVDSVLDVVR.K               |
|                    | Hs293FLP_Ti_303.3357.33: | 4.1617 | 0.1819 | 1959.92 | 1960.15 | 7405    | 2   | 1468.9 | 42.6                            | 6  | K.GHYTEGAELVDSVLDVVR.K               |
|                    | HsHeLa_Control-MG_Ti_10  | 6.1452 | 0.4266 | 1959.96 | 1960.15 | 8101.6  | 1   | 2856.7 | 79.4                            | 5  | K.GHYTEGAELVDSVLDVVR.K               |
|                    | Hs293FLP-MG_Ti_205.353:  | 4.315  | 0.1813 | 1959.98 | 1960.15 | 9417.8  | 1   | 1643   | 41.2                            | 5  | K.GHYTEGAELVDSVLDVVR.K               |
|                    | Hs293FLP-MG_Ti_204.367:  | 6.6846 | 0.431  | 1959.98 | 1960.15 | 10282.1 | 1   | 3961.5 | 82.4                            | 8  | K.GHYTEGAELVDSVLDVVR.K               |
|                    | Hs293FLP_Ti_306.3198.31: | 6.98   | 0.3863 | 1960.01 | 1960.15 | 9148.7  | 1   | 3744.2 | 85.3                            | 7  | K.GHYTEGAELVDSVLDVVR.K               |
|                    | HsFLAG-Control_HeLa_S10  | 4.5919 | 0.2553 | 1960.03 | 1960.15 | 7594.6  | 1   | 1242.3 | 41.2                            | 2  | K.GHYTEGAELVDSVLDVVR.K               |
|                    | HsHeLa_Control-MG_Ti_10  | 3.5165 | 0.1922 | 1960.13 | 1960.15 | 6171.6  | 3   | 834.7  | 35.3                            | 1  | K.GHYTEGAELVDSVLDVVR.K               |
|                    | HsHeLa_Control-MG_Ti_20  | 4.3353 | 0.2198 | 1960.22 | 1960.15 | 8005.9  | 1   | 1897.4 | 47.1                            | 2  | K.GHYTEGAELVDSVLDVVR.K               |
|                    | HsFLAG-Control_HeLa_S10  | 5.8707 | 0.417  | 1960.53 | 1960.15 | 9914.1  | 1   | 3928.7 | 82.4                            | 2  | K.GHYTEGAELVDSVLDVVR.K               |
|                    | HsHeLa_Control-MG_Ti_20  | 6.9239 | 0.4578 | 1960.6  | 1960.15 | 10283.3 | 1   | 4222.7 | 85.3                            | 8  | K.GHYTEGAELVDSVLDVVR.K               |
|                    | HsHeLa_Control_Ti_105.38 | 6.5934 | 0.4301 | 1960.92 | 1960.15 | 9241.8  | 1   | 3541.4 | 82.4                            | 7  | K.GHYTEGAELVDSVLDVVR.K               |
|                    | HsFLAG-Control_HeLa_NE   | 4.632  | 0.1653 | 1961.1  | 1960.15 | 7796.1  | 7   | 1433.4 | 44.1                            | 1  | K.GHYTEGAELVDSVLDVVR.K               |
|                    | HsHeLa_Control_Ti_105.38 | 3.9939 | 0.1774 | 1961.13 | 1960.15 | 6245.6  | 2   | 1192.6 | 45.6                            | 2  | K.GHYTEGAELVDSVLDVVR.K               |
|                    | HsFLAG-Control_HeLa_S10  | 4.764  | 0.2325 | 1961.21 | 1960.15 | 8029.8  | 1   | 1535   | 42.6                            | 2  | K.GHYTEGAELVDSVLDVVR.K               |
|                    | HsFLAG-Control_HeLa_S10  | 6.9041 | 0.4463 | 1961.25 | 1960.15 | 11475.7 | 1   | 4165.7 | 82.4                            | 14 | K.GHYTEGAELVDSVLDVVR.K               |
|                    | HsFLAG-Control_HeLa_S10  | 5.9828 | 0.4073 | 1961.57 | 1960.15 | 10193.9 | 1   | 3020.1 | 76.5                            | 5  | K.GHYTEGAELVDSVLDVVR.K               |
|                    | HsGST-MOCK_Ti_102.285:   | 4.2626 | 0.1599 | 1962    | 1960.15 | 7062.2  | 4   | 1185.6 | 41.2                            | 1  | K.GHYTEGAELVDSVLDVVR.K               |
|                    | Hs293FLP_Ti_306.3098.30: | 6.1016 | 0.4085 | 2088.19 | 2088.33 | 9030.4  | 1   | 2434   | 72.2                            | 2  | K.GHYTEGAELVDSVLDVVRK.E              |
|                    | HsHeLa_Control_Ti_106.36 | 2.6425 | 0.3564 | 2089.18 | 2088.33 | 10954.4 | 1   | 669    | 41.7                            | 1  | K.GHYTEGAELVDSVLDVVRK.E              |
|                    | HsFLAG-MOCK_300mM_T      | 4.8098 | 0.3951 | 2089.85 | 2088.33 | 6163.4  | 1   | 1098.1 | 41.7                            | 3  | K.GHYTEGAELVDSVLDVVRK.E              |
|                    | Hs293FLP_Ti_305.3017.30  | 5.121  | 0.3371 | 2090.41 | 2088.33 | 6587.3  | 1   | 1579.1 | 48.6                            | 9  | K.GHYTEGAELVDSVLDVVRK.E              |
|                    | HsFLAG-Control_MG_293_   | 4.3284 | 0.3282 | 1320.01 | 1320.59 | 8983.2  | 1   | 1855   | 86.4                            | 18 | R.IMNTFSVVPSPK.V                     |
|                    | HsFLAG-Control_293_Ti_20 | 2.3562 | 0.2676 | 1130.49 | 1131.28 | 3790.3  | 1   | 334.2  | 72.2                            | 1  | R.FPGQLNADLR.K                       |
|                    | HsFLAG-Control_HeLa_S10  | 3.3308 | 0.1729 | 1130.86 | 1131.28 | 4313.3  | 1   | 873.6  | 88.9                            | 23 | R.FPGQLNADLR.K                       |
|                    | HsFLAG-Control_MG_293_   | 3.206  | 0.113  | 1130.88 | 1131.28 | 3899.4  | 1   | 816.9  | 88.9                            | 6  | R.FPGQLNADLR.K                       |
|                    | HsFLAG-Control_HeLa_S10  | 2.9598 | 0.1628 | 1259.33 | 1259.45 | 6893.9  | 1   | 1452.3 | 90                              | 5  | R.FPGQLNADLRK.L                      |
|                    | HsHeLa_Control-MG_Ti_10  | 3.4275 | 0.2361 | 1272.73 | 1272.59 | 5940.6  | 2   | 973.4  | 75                              | 2  | R.KLAVNMVPPFR.L                      |
|                    | HsF-IP-293-MG_Ti_104.21: | 3.5921 | 0.3097 | 1145.56 | 1144.42 | 4625.3  | 1   | 875.9  | 88.9                            | 19 | K.LAVNMVPPFR.L                       |
|                    | HsHeLa-FLAG-IP_S100_Ti   | 3.5217 | 0.3098 | 1692.35 | 1692.97 | 3844.5  | 1   | 610.2  | 67.9                            | 9  | R.ALTVPELTQQMFDK.N                   |
|                    | HsHeLa-FLAG-IP_S100_Ti   | 2.9555 | 0.2199 | 1068.25 | 1066.2  | 7345.1  | 2   | 1221.1 | 81.2                            | 2  | K.NMMAACDPR.H                        |
|                    | HsFLAG-Control_HeLa_S10  | 4.2481 | 0.345  | 1697.72 | 1697.89 | 5597.6  | 1   | 913.8  | 69.2                            | 79 | K.NSSYFVEWIPNNVK.V                   |

|                   |                          |        |        |         |         |         |     |        |      |    |                                                                 |
|-------------------|--------------------------|--------|--------|---------|---------|---------|-----|--------|------|----|-----------------------------------------------------------------|
| *                 | Hs283FLP_Ti_103.2794.27  | 5.1829 | 0.4392 | 1875.9  | 1875.15 | 4237    | 1   | 1173   | 71.9 | 70 | K.MSSTFIGNSTAIQELFK.R                                           |
|                   | HsHeLa_Control-MG_Ti_10  | 3.5998 | 0.3059 | 1388.48 | 1386.61 | 7275    | 1   | 1173.3 | 80   | 3  | K.RISEQFTAMFR.R                                                 |
| gi 14670350 ref N |                          | 29     | 71     | 0.291   | 998     | 112416  | 6.4 | U      |      |    | general transcription factor II, i isoform 1 [Homo sapiens]     |
| gi 14670354 ref N |                          | 29     | 71     | 0.297   | 977     | 110106  | 7.4 | U      |      |    | general transcription factor II, i isoform 3 [Homo sapiens]     |
| gi 14670352 ref N |                          | 29     | 71     | 0.297   | 978     | 110280  | 6.7 | U      |      |    | general transcription factor II, i isoform 2 [Homo sapiens]     |
|                   | HsFLAG-Control_HeLa_NE   | 2.8495 | 0.0973 | 1302.39 | 1301.44 | 5418.3  | 1   | 844.3  | 80   | 2  | K.HPENYDLATLK.W                                                 |
|                   | HsHeLa3_Ti_105.1675.167  | 2.5927 | 0.2664 | 1272.62 | 1273.44 | 4605.7  | 3   | 439.2  | 58.3 | 2  | R.SILSPGGSCGPIK.V                                               |
|                   | HsFLAG-Control_HeLa_NE   | 3.7084 | 0.2931 | 1729.02 | 1729.93 | 4652.6  | 1   | 729.5  | 62.5 | 2  | K.ANELPQPPVPEPANAGK.R                                           |
|                   | HsFLAG-Control_HeLa_NE   | 5.1862 | 0.4159 | 3471.36 | 3470.99 | 8294.7  | 1   | 1390.3 | 30.8 | 1  | K.AKGPVTIPYPLFQSHVEDLYVEGLPEGIPFR.R                             |
|                   | HsFLAG-Control_HeLa_NE   | 3.8949 | 0.2478 | 3271.61 | 3271.74 | 3424.7  | 1   | 330.2  | 27.7 | 3  | K.GPVTIPYPLFQSHVEDLYVEGLPEGIPFR.R                               |
|                   | HsFLAG-Control_HeLa_NE   | 3.1689 | 0.1623 | 1400.62 | 1400.57 | 7310.3  | 2   | 846.1  | 70.8 | 1  | R.EDLQDKPASGVK.E                                                |
|                   | HsFLAG-Control_HeLa_NE   | 3.18   | 0.3169 | 1252.37 | 1252.41 | 8166    | 1   | 1160.8 | 72.7 | 1  | K.KFAEALGSTEAK.A                                                |
|                   | HsFLAG-Control_HeLa_NE   | 2.3131 | 0.2165 | 1123.52 | 1124.24 | 9161.8  | 1   | 957.5  | 65   | 1  | K.FAEALGSTEAK.A                                                 |
|                   | HsFLAG-Control_HeLa_NE   | 3.2349 | 0.2143 | 1124.08 | 1124.24 | 4860.3  | 1   | 1620.3 | 90   | 1  | K.FAEALGSTEAK.A                                                 |
|                   | HsFLAG-Control_HeLa_NE   | 4.3228 | 0.3444 | 2357.75 | 2358.62 | 5991.2  | 1   | 881.2  | 55.3 | 2  | K.FEAHPNDLYVEGLPENIPFR.S                                        |
|                   | HsFLAG-Control_HeLa_NE   | 2.9452 | 0.1359 | 1063.22 | 1063.2  | 5447.9  | 1   | 1227.3 | 93.8 | 4  | R.SPSWYGIPR.L                                                   |
|                   | HsFLAG-MOCK_300mM_T      | 4.3991 | 0.3836 | 1865.78 | 1866.08 | 7391.7  | 1   | 1526.3 | 76.7 | 1  | K.RPELLTHSTTEVTQPR.T                                            |
|                   | HsFLAG-Control_HeLa_NE   | 3.8786 | 0.3368 | 1865.93 | 1866.08 | 6700.4  | 1   | 424.1  | 53.3 | 2  | K.RPELLTHSTTEVTQPR.T                                            |
|                   | HsFLAG-Control_HeLa_NE   | 5.2462 | 0.3918 | 1867.62 | 1866.08 | 8768    | 1   | 2200.3 | 51.7 | 2  | K.RPELLTHSTTEVTQPR.T                                            |
|                   | HsFLAG-MOCK_300mM_T      | 3.984  | 0.4102 | 1868.84 | 1866.08 | 7763.3  | 1   | 1205.5 | 43.3 | 1  | K.RPELLTHSTTEVTQPR.T                                            |
|                   | HsFLAG-Control_HeLa_NE   | 2.7354 | 0.1485 | 1458.94 | 1459.6  | 8972.5  | 6   | 583.9  | 54.5 | 1  | R.TNTPVKEDWNV.R.I                                               |
|                   | HsFLAG-Control_HeLa_NE   | 4.7837 | 0.2459 | 1250.49 | 1248.47 | 4835.1  | 1   | 1335   | 90.9 | 5  | K.FAQALGLTEAVK.V                                                |
|                   | HsFLAG-Control_HeLa_NE   | 5.1574 | 0.4427 | 2896.06 | 2897.3  | 7001.6  | 1   | 1269.7 | 52.1 | 7  | K.VPYPVFESNPEFLYVEGLPEGIPFR.S                                   |
|                   | HsFLAG-Control_HeLa_NE   | 4.745  | 0.4849 | 2897.08 | 2897.3  | 5312.2  | 1   | 744    | 45.8 | 5  | K.VPYPVFESNPEFLYVEGLPEGIPFR.S                                   |
|                   | HsFLAG-Control_HeLa_NE   | 3.5712 | 0.3321 | 2897.37 | 2897.3  | 7093.6  | 1   | 787.9  | 29.2 | 1  | K.VPYPVFESNPEFLYVEGLPEGIPFR.S                                   |
|                   | HsFLAG-Control_HeLa_NE   | 4.5094 | 0.3707 | 2898.64 | 2897.3  | 4877.7  | 1   | 1072.3 | 35.4 | 3  | K.VPYPVFESNPEFLYVEGLPEGIPFR.S                                   |
|                   | HsFLAG-Control_HeLa_NE   | 3.6155 | 0.283  | 1061.03 | 1061.23 | 5953.9  | 1   | 923.5  | 87.5 | 5  | R.SPTWFGIPR.L                                                   |
|                   | HsFLAG-Control_HeLa_NE   | 5.5258 | 0.4681 | 2364.7  | 2365.56 | 5882.3  | 1   | 1250.9 | 59.5 | 4  | K.VPEIEVTVEGPNNNNPQTSAVR.T                                      |
|                   | HsFLAG-Control_HeLa_NE   | 5.4502 | 0.4674 | 2364.8  | 2365.56 | 9003    | 1   | 1604.6 | 40.5 | 3  | K.VPEIEVTVEGPNNNNPQTSAVR.T                                      |
|                   | HsFLAG-Control_HeLa_NE   | 4.1029 | 0.2623 | 1644.8  | 1644.83 | 6134.9  | 1   | 935.7  | 64.3 | 3  | R.TPTQTNGSNVFPKPR.G                                             |
|                   | HsFLAG-Control_HeLa_NE   | 3.3378 | 0.2806 | 1229.23 | 1229.33 | 6218    | 6   | 787.7  | 77.8 | 2  | R.EFSFEAWNAK.I                                                  |
|                   | HsFLAG-Control_HeLa_NE   | 3.0837 | 0.203  | 2889.48 | 2890.26 | 6407    | 2   | 219.4  | 27.1 | 2  | K.VPFALFESFPEDFYVEGLPEGVPFR.R                                   |
|                   | HsFLAG-Control_HeLa_NE   | 3.2716 | 0.1198 | 1031.26 | 1031.2  | 6255.7  | 1   | 1018.5 | 93.8 | 3  | R.RPSTFGIPR.L                                                   |
|                   | HsFLAG-Control_HeLa_NE   | 2.9824 | 0.1933 | 1037.23 | 1036.21 | 2673.1  | 9   | 542.4  | 87.5 | 1  | R.ILDSAEIFK.F                                                   |
| gi 20127486 ref N |                          | 7      | 29     | 0.288   | 434     | 47047   | 5.4 | U      |      |    | mannose 6 phosphate receptor binding protein 1 [Homo sapiens]   |
| *                 | HsFLAG-Control_HeLa_S1(  | 4.8848 | 0.3976 | 1528.42 | 1528.79 | 7918.1  | 1   | 1802.3 | 73.3 | 13 | R.TLTAAAVSGAQPILSK.L                                            |
| *                 | HsFLAG-Control_HeLa_NE   | 3.774  | 0.3045 | 1572.11 | 1572.72 | 4075.4  | 1   | 619.5  | 73.1 | 2  | K.LEPQIASASEYHR.G                                               |
| *                 | HsFLAG-Control_HeLa_S1(  | 3.1791 | 0.1696 | 2068.5  | 2066.36 | 7421    | 1   | 546.4  | 47.1 | 1  | R.GLDKLEENLPILQQPTEK.V                                          |
| *                 | HsFLAG-Control_HeLa_S1(  | 5.3196 | 0.4361 | 1578.05 | 1577.69 | 8974.2  | 1   | 1998.6 | 75   | 6  | K.DTVATQLSEAVDATR.G                                             |
| *                 | HsFLAG-Control_HeLa_S1(  | 3.5065 | 0.3754 | 2068.59 | 2068.21 | 6103    | 1   | 383.1  | 44.1 | 1  | K.SEEWADNHLPLTDAELAR.I                                          |
| *                 | HsFLAG-Control_HeLa_S1(  | 5.2393 | 0.4258 | 1837.69 | 1836.01 | 9850.5  | 1   | 2567.9 | 75   | 5  | R.IATSLDGFVDVASVQQQR.Q                                          |
| *                 | HsFLAG-Control_HeLa_S1(  | 3.6527 | 0.2777 | 2996    | 2996.26 | 11011.3 | 2   | 826.4  | 25   | 1  | R.QVEDLQATFSSIHQFQDLSSSILAQSR.E                                 |
| gi 4506457 ref Nf |                          | 9      | 34     | 0.287   | 317     | 36876   | 4.4 | U      |      |    | reticulocalbin 2, EF-hand calcium binding domain [Homo sapiens] |
| *                 | HsFLAG-Control_293_Ti_1( | 3.4441 | 0.295  | 1707.43 | 1707.88 | 7605.6  | 1   | 874.6  | 60.7 | 1  | R.EALLGVQEDVDEYVK.L                                             |
| *                 | HsFLAG-Control_293_Ti_1( | 4.6665 | 0.4739 | 2215.84 | 2216.28 | 8681.2  | 1   | 1330.5 | 58.3 | 7  | R.VIDFDENTALDDAEEESFR.K                                         |
| *                 | HsFLAG-Control_293_Ti_1( | 2.5998 | 0.1656 | 2343.62 | 2344.45 | 9162.9  | 1   | 440.4  | 39.5 | 1  | R.VIDFDENTALDDAEEESFRK.L                                        |
| *                 | HsFLAG-Control_293_Ti_1( | 3.9812 | 0.3755 | 1818.19 | 1818.94 | 8744.5  | 1   | 1068.4 | 60   | 5  | K.NGDGFVSLSEFLGDYR.W                                            |
| *                 | HsFLAG-Control_293_Ti_1( | 3.666  | 0.3423 | 1943    | 1943.12 | 6042.8  | 1   | 938.5  | 66.7 | 3  | R.WDPTANEDPEWILVEK.D                                            |
| *                 | Hs293FLP-MG_Ti_203.360   | 4.3001 | 0.2629 | 2770.24 | 2771.01 | 7426.5  | 2   | 751.5  | 41.3 | 1  | K.KLSEEEILENPDLFLTSEATDYGR.Q                                    |



|                   |                          |        |        |         |         |         |     |        |      |    |                                                                        |
|-------------------|--------------------------|--------|--------|---------|---------|---------|-----|--------|------|----|------------------------------------------------------------------------|
| *                 | HsFLAG-Control_293_Ti_1( | 4.2361 | 0.2446 | 2770.81 | 2771.01 | 10643.2 | 1   | 1255.2 | 31.5 | 3  | K.KLSEEEILENPDFLTSEATDYGR.Q                                            |
| *                 | HsFLAG-Control_293_Ti_1( | 4.6084 | 0.3643 | 2771.43 | 2771.01 | 7671.9  | 1   | 1149.3 | 50   | 8  | K.KLSEEEILENPDFLTSEATDYGR.Q                                            |
| *                 | HsFLAG-Control_293_Ti_1( | 4.256  | 0.4118 | 2642.35 | 2642.83 | 6286.4  | 1   | 757.9  | 47.7 | 5  | K.LSEEEILENPDFLTSEATDYGR.Q                                             |
| gi 4503745 ref NF |                          | 46     | 119    | 0.286   | 2647    | 280759  | 6.1 | U      |      |    | filamin 1 (actin-binding protein-280) [Homo sapiens]                   |
| *                 | HsFlag1P_Ti_102.2428.242 | 2.7245 | 0.2146 | 1417.7  | 1416.57 | 4734.7  | 1   | 419.1  | 62.5 | 1  | R.IANLQTDLSDGLR.L                                                      |
| *                 | HsHeLa_Control-MG_Ti_20  | 4.0112 | 0.3224 | 1227.4  | 1227.53 | 5098.2  | 1   | 1284   | 90   | 3  | R.LIALLEVLVSQK.K                                                       |
| *                 | HsHeLa_Control-MG_Ti_20  | 2.5246 | 0.09   | 1286.59 | 1286.52 | 3698.3  | 2   | 626.1  | 80   | 1  | K.LPQLPITNFSR.D                                                        |
| *                 | HsHeLa_Control-MG_Ti_20  | 4.0442 | 0.3287 | 2314.92 | 2314.47 | 7580.4  | 1   | 843.1  | 47.6 | 1  | R.SAGQGEVLVYVEDPAGHQEEAK.V                                             |
| *                 | HsHeLa_Control-MG_Ti_20  | 2.6495 | 0.127  | 1752.15 | 1751.98 | 4992.9  | 4   | 349.8  | 46.4 | 3  | R.TFSVWYVPEVTGTHK.V                                                    |
| *                 | HsHeLa_Control-MG_Ti_20  | 3.9072 | 0.2597 | 1284.42 | 1284.54 | 6461.3  | 1   | 1489   | 86.4 | 4  | K.VTVLFAGQHIK.S                                                        |
| *                 | HsFLAG-Control_293_Ti_2( | 2.5071 | 0.196  | 1653.87 | 1653.83 | 4758.3  | 8   | 286.8  | 46.9 | 1  | K.VTAQGPGLPSGNIANK.T                                                   |
| *                 | HsFLAG-Control_MG_293_   | 3.688  | 0.4601 | 1869.31 | 1868.97 | 6005.5  | 3   | 416.3  | 50   | 2  | R.SPYTVTVGQACNPSACR.A                                                  |
| *                 | HsHeLa_Control-MG_Ti_20  | 3.2148 | 0.1966 | 2538.01 | 2537.71 | 6870.2  | 1   | 499    | 42.5 | 1  | R.YWPQEAGEYAVHVLCSNEDIR.L                                              |
| *                 | HsFlag1P_Ti_105.1934.193 | 4.1068 | 0.3702 | 1647.48 | 1647.87 | 5318.5  | 1   | 1133.2 | 70   | 2  | K.TGVAVNKPAEFTVDAK.H                                                   |
| *                 | HsHeLa_Control-MG_Ti_20  | 4.6372 | 0.3796 | 1785.37 | 1785.96 | 8293.4  | 1   | 959.9  | 60   | 1  | R.VQVQDNEGCPVEALVK.D                                                   |
| *                 | HsHeLa_Control-MG_Ti_20  | 4.1858 | 0.2726 | 1699.52 | 1699.95 | 6133    | 1   | 942.3  | 66.7 | 3  | R.TGVELGKPTHFTVNAK.A                                                   |
| *                 | HsFLAG-Control_HeLa_S1(  | 3.9335 | 0.4293 | 2287    | 2287.58 | 7732.2  | 1   | 1049.1 | 52.4 | 5  | K.YTPVQQGPVGNVTVYGGDPIPK.S                                             |
| *                 | HsHeLa_Control-MG_Ti_20  | 4.399  | 0.311  | 1534.37 | 1534.75 | 5830.7  | 1   | 1119.4 | 71.4 | 3  | K.SPFSVAVSPSLDLSK.I<br>R.FLPREEGPYEVEVTDYDGVVPVGPSPFPLEAVAPTSPK        |
| *                 | HsHeLa_Control-MG_Ti_20  | 3.692  | 0.1746 | 4000.77 | 4001.53 | 7427.4  | 1   | 567.3  | 20.8 | 1  | .V                                                                     |
| *                 | HsHeLa_Control-MG_Ti_10  | 5.1486 | 0.4181 | 3487.54 | 3487.89 | 5414.7  | 1   | 592.5  | 26.6 | 3  | R.EEGPYEVEVTDYDGVVPVGPSPFPLEAVAPTSPK.V                                 |
| *                 | HsFLAG-MOCK_300mM_T      | 3.8786 | 0.3316 | 1430.32 | 1430.56 | 6111.2  | 1   | 1114.8 | 70   | 6  | K.AFGPGLQGGSSAGSPAR.F                                                  |
| *                 | HsHeLa_Control-MG_Ti_20  | 4.489  | 0.5355 | 2763.71 | 2765.02 | 7205.3  | 1   | 1109.3 | 50   | 3  | K.LQVEPAVDTSQVQCYGPGIEGQGVFR.E                                         |
| *                 | HsHeLa_Control-MG_Ti_20  | 2.869  | 0.281  | 1109.19 | 1109.27 | 7579.7  | 1   | 994    | 75   | 2  | R.ALQTGGPHVK.A<br>K.VEYTPYEGLHSVDVTDYDGVSPVPSPFQVPVTEGCD               |
| *                 | HsHeLa_Control-MG_Ti_20  | 5.7175 | 0.4588 | 4298.74 | 4299.57 | 6049.3  | 1   | 1193.6 | 28.9 | 2  | PSR.V                                                                  |
| *                 | HsHeLa_Control-MG_Ti_20  | 4.1971 | 0.4224 | 1635.17 | 1635.82 | 6552.2  | 1   | 1044.8 | 66.7 | 3  | R.VHGPPIQSGTTNKPNK.F                                                   |
| *                 | HsHeLa_Control-MG_Ti_20  | 2.84   | 0.2378 | 1167.36 | 1168.29 | 4668.7  | 2   | 406.1  | 55   | 2  | K.VPVHDVTDASK.V                                                        |
| *                 | HsHeLa_Control-MG_Ti_20  | 3.0872 | 0.2517 | 1168.14 | 1168.29 | 5490.8  | 1   | 1141.7 | 90   | 1  | K.VPVHDVTDASK.V                                                        |
| *                 | HsHeLa_Control-MG_Ti_20  | 6.0972 | 0.4649 | 2544.44 | 2545.77 | 10345   | 1   | 2361.3 | 58.7 | 7  | K.GLVEPVDDVDNADGTQTVNYVPSR.E<br>K.GLVEPVDDVDNADGTQTVNYVPSREGPYSISVLYGD |
| *                 | HsFLAG-MOCK_300mM_T      | 3.696  | 0.3104 | 4438.07 | 4437.82 | 5986.4  | 1   | 604.2  | 20.6 | 1  | EEVPR.S                                                                |
| *                 | HsHeLa_Control-MG_Ti_20  | 4.1704 | 0.355  | 2343.48 | 2343.64 | 3896.3  | 1   | 560    | 50   | 11 | K.ASGPGLNTTGVPASLPVEFTIDAK.D                                           |
| *                 | HsFLAG-Control_293_Ti_2( | 3.749  | 0.2162 | 1938.98 | 1939.17 | 9057.5  | 1   | 1227.5 | 52.8 | 2  | K.DAGEGLLAVQITDPEGKPK.K                                                |
| *                 | HsHeLa_Control-MG_Ti_20  | 3.6138 | 0.3683 | 2588.14 | 2588.8  | 5689.7  | 1   | 980.6  | 34.1 | 1  | K.KTHIQDNHDGTYTVAYVPDVTGR.Y                                            |
| *                 | HsHeLa_Control-MG_Ti_20  | 4.7974 | 0.4223 | 2946.22 | 2947.28 | 5067.8  | 1   | 991.6  | 35.2 | 1  | R.FGGEHVNSPFQVTALAGDQPSVQPPLR.S                                        |
| *                 | HsHeLa_Control-MG_Ti_20  | 4.697  | 0.4131 | 2946.79 | 2947.28 | 7849.7  | 1   | 1320.1 | 46.3 | 2  | R.FGGEHVNSPFQVTALAGDQPSVQPPLR.S                                        |
| *                 | HsFLAG-Control_293_Ti_2( | 2.8521 | 0.3032 | 1589.66 | 1589.76 | 6989.7  | 1   | 623.4  | 57.7 | 1  | R.YAPSEAGLHEMDIR.Y                                                     |
| *                 | HsHeLa_Control-MG_Ti_20  | 3.6905 | 0.2797 | 1603.3  | 1603.73 | 3664.3  | 1   | 571.1  | 69.2 | 3  | K.YNEQHVPVGPSPFTAR.V                                                   |
| *                 | Hs293FLP-MG_Ti_203.455   | 3.8073 | 0.2511 | 3765.65 | 3765.26 | 3365.5  | 1   | 391.6  | 25   | 2  | K.VGSAADIPINISSETDLSLLTATVPPSGREEPCLLK.R                               |
| *                 | HsHeLa_Control-MG_Ti_20  | 1.9087 | 0.3179 | 1154.44 | 1155.34 | 2519.9  | 3   | 306.1  | 65   | 1  | R.NGHVGISFVPK.E                                                        |
| *                 | HsHeLa_Control-MG_Ti_20  | 2.5015 | 0.2198 | 1148.52 | 1149.29 | 2274.7  | 1   | 193.4  | 61.1 | 2  | K.ETGEHLVHVK.K                                                         |
| *                 | HsHeLa_Control-MG_Ti_20  | 3.4009 | 0.2782 | 1515.98 | 1516.7  | 3949.9  | 1   | 699.8  | 73.1 | 2  | K.FADQHVPVGPSPFSVK.V                                                   |
| *                 | HsHeLa_Control-MG_Ti_20  | 5.6398 | 0.4004 | 2003.54 | 2003.28 | 9509    | 1   | 2671.5 | 72.2 | 2  | K.IPEISIQDMTAQVTSPSGK.T                                                |
| *                 | HsHeLa_Control-MG_Ti_20  | 3.6428 | 0.3123 | 1503.49 | 1503.76 | 3394.5  | 1   | 561.5  | 76.9 | 2  | R.FVPAEMGTHTVSVK.Y                                                     |
| *                 | HsHeLa_Control-MG_Ti_20  | 3.6536 | 0.3047 | 1533.61 | 1534.71 | 3409.3  | 2   | 449.4  | 65.4 | 2  | R.AEAGVPAEFSIWTR.E                                                     |
| *                 | HsHeLa_Control-MG_Ti_10  | 3.9532 | 0.2955 | 1419.47 | 1418.63 | 6554.7  | 1   | 1599.7 | 83.3 | 2  | R.RLTVSSLQESGLK.V                                                      |
| *                 | HsHeLa_Control-MG_Ti_20  | 5.6126 | 0.5338 | 2277.47 | 2278.4  | 6995.2  | 1   | 1939   | 68.4 | 3  | K.VHSPSGALEECYVTEIDQDK.Y                                               |
| *                 | HsHeLa_Control-MG_Ti_20  | 3.0412 | 0.2326 | 1302.39 | 1302.48 | 4319.6  | 1   | 589.2  | 72.7 | 1  | K.FNGTHIPGSPFK.I                                                       |

|                   |                          |        |        |         |         |        |      |        |      |    |                                                                          |
|-------------------|--------------------------|--------|--------|---------|---------|--------|------|--------|------|----|--------------------------------------------------------------------------|
| *                 | HsHeLa_Control-MG_Ti_20  | 3.5104 | 0.2496 | 1381.14 | 1380.55 | 8189.8 | 2    | 874.1  | 58.3 | 3  | K.YGGPYHIGGSPFK.A                                                        |
| *                 | HsHeLa_Control-MG_Ti_20  | 5.1175 | 0.4994 | 2200.28 | 2201.44 | 9175.5 | 1    | 1522   | 57.9 | 4  | R.LVSNHSLHETSSVFVDSLTK.A                                                 |
| *                 | HsHeLa_Control-MG_Ti_20  | 4.3178 | 0.4725 | 2200.79 | 2201.44 | 6809.3 | 1    | 1325.1 | 40.8 | 2  | R.LVSNHSLHETSSVFVDSLTK.A                                                 |
| *                 | HsHeLa_Control-MG_Ti_20  | 4.4883 | 0.4179 | 1790.35 | 1790.9  | 5469.1 | 1    | 1051.1 | 66.7 | 8  | K.ATCAPQHAGPGGPADASK.V                                                   |
| gi 27436946 ref N |                          | 17     | 61     | 0.286   | 664     | 74140  | 7    | U      |      |    | lamin A/C isoform 1 precursor [Homo sapiens]                             |
| gi 27436948 ref N |                          | 17     | 61     | 0.3     | 634     | 70661  | 8.4  | U      |      |    | lamin A/C isoform 3 [Homo sapiens]                                       |
|                   | HsHeLa3_Ti_103.1318.131  | 3.9035 | 0.1963 | 1360.52 | 1360.47 | 5716.5 | 1    | 1048.8 | 73.1 | 7  | R.SGAQASSTPLSPTR.I                                                       |
|                   | HsFLAG-Control_HeLa_NE   | 4.4185 | 0.2423 | 1630.17 | 1630.75 | 8881.8 | 1    | 1914.1 | 79.2 | 1  | R.LQEKEDLQELNDR.L                                                        |
|                   | HsFLAG-Control_HeLa_NE   | 3.1989 | 0.1656 | 1132.18 | 1132.17 | 6862.3 | 5    | 836.4  | 81.2 | 2  | K.EDLQELNDR.L                                                            |
|                   | HsFLAG-Control_HeLa_NE   | 3.8609 | 0.1834 | 1149.7  | 1149.24 | 6803.3 | 1    | 1443.9 | 88.9 | 6  | R.ITESEEVVSR.E                                                           |
|                   | HsFLAG-Control_HeLa_NE   | 3.4433 | 0.3215 | 1294.18 | 1294.41 | 8383   | 1    | 1807.9 | 81.8 | 2  | K.AAYEAELGDARK.T                                                         |
|                   | HsFLAG-Control_HeLa_NE   | 3.468  | 0.0852 | 1044.28 | 1044.15 | 5337   | 1    | 968.1  | 88.9 | 2  | K.EGDLIAAQAR.L                                                           |
|                   | HsFLAG-Control_HeLa_NE   | 3.8782 | 0.1201 | 1029.28 | 1029.18 | 6594.1 | 1    | 1470.5 | 93.8 | 4  | R.LADALQELR.A                                                            |
|                   | HsFLAG-Control_HeLa_NE   | 4.9781 | 0.4396 | 1753.59 | 1753.87 | 5991.6 | 1    | 1074.7 | 63.3 | 12 | R.NSNLVGAAHEELQQR.I                                                      |
|                   | HsHeLa3_Ti_106.2420.242  | 5.0383 | 0.3621 | 1702.14 | 1700.98 | 8380.1 | 1    | 1848   | 71.4 | 4  | R.IRIDSLSAQLSQLQK.Q                                                      |
|                   | HsFLAG-Control_HeLa_NE   | 4.0637 | 0.2301 | 1432.59 | 1431.63 | 7785.1 | 1    | 1368.3 | 75   | 3  | R.IDSLSAQLSQLQK.Q                                                        |
|                   | HsHeLa3_Ti_102.3010.301  | 4.518  | 0.2628 | 1895.78 | 1895.14 | 6433.2 | 1    | 1493.9 | 75   | 2  | R.MQQQLDEYQELLDIK.L                                                      |
|                   | HsHeLa3_Ti_102.1373.137  | 2.8162 | 0.3322 | 1203.55 | 1204.28 | 9820   | 1    | 1020.9 | 65   | 2  | R.VAVEEVDEEGK.F                                                          |
|                   | HsFLAG-Control_HeLa_NE   | 3.3034 | 0.2881 | 1204.23 | 1204.28 | 6098.4 | 1    | 1425.8 | 90   | 5  | R.VAVEEVDEEGK.F                                                          |
|                   | HsFLAG-MOCK_300mM_T      | 4.2612 | 0.3747 | 2535.94 | 2534.88 | 8062.9 | 1    | 933.6  | 41.7 | 1  | K.AGQVVTIWAAGAGATHSPPTDLVWK.A                                            |
|                   | HsFLAG-Control_HeLa_NE   | 3.2262 | 0.3381 | 1407.4  | 1407.5  | 9142.4 | 1    | 1132.2 | 70.8 | 1  | R.TVLCGTCGQPADK.A                                                        |
|                   | HsHeLa3_Ti_103.1306.130  | 2.4498 | 0.2504 | 1407.47 | 1407.5  | 7354.6 | 3    | 461    | 54.2 | 2  | R.TVLCGTCGQPADK.A                                                        |
|                   | HsHeLa3_Ti_103.1566.156  | 5.1248 | 0.4928 | 2366.08 | 2366.5  | 5678.3 | 1    | 1179.7 | 51.9 | 5  | K.ASASGSGAQVGGPISSGSSASSVTVTR.S                                          |
| gi 4758900 ref NF |                          | 11     | 25     | 0.283   | 520     | 59609  | 8.2  | U      |      |    | 6-phosphofructo-2-kinase/fructose-2,6-biphosphatase 3 [Homo sapiens]     |
|                   | HsFLAG-Control_MG_293_   | 3.6934 | 0.2869 | 1191.41 | 1191.42 | 7606   | 1    | 1478.6 | 88.9 | 4  | R.YLNWIGVPTK.V                                                           |
| *                 | Hs293FLP-MG_Ti_202.218   | 3.2364 | 0.2937 | 1580.31 | 1580.7  | 6776.6 | 1    | 971.3  | 64.3 | 2  | K.EGGQIAVFDATNTTR.E                                                      |
| *                 | Hs293FLP-MG_Ti_203.397   | 4.3754 | 0.405  | 2473.66 | 2472.78 | 8948.4 | 1    | 1153.5 | 50   | 3  | K.AFFIESVCDDPTVVASNIMEVK.I                                               |
| *                 | Hs293FLP_Ti_303.1609.16  | 3.9258 | 0.3603 | 1945    | 1943.09 | 3790.6 | 1    | 836.8  | 63.3 | 3  | K.RISCYEASYQPLDPDK.C                                                     |
| *                 | Hs293FLP-MG_Ti_202.212   | 3.814  | 0.4416 | 1786.37 | 1786.9  | 8635.8 | 1    | 1441.6 | 64.3 | 1  | R.ISCYEASYQPLDPDK.C                                                      |
| *                 | HsFLAG-Control_MG_293_   | 4.0917 | 0.3744 | 1290.57 | 1291.33 | 9216.2 | 1    | 1881.3 | 90   | 6  | R.HGENEHNLQGR.I                                                          |
|                   | HsFLAG-Control_293_Ti_2( | 1.9329 | 0.1065 | 861.42  | 862.017 | 6154.2 | 1    | 483.1  | 83.3 | 1  | R.VWTSQLK.S                                                              |
| *                 | HsFLAG-Control_MG_293_   | 3.3734 | 0.2617 | 1090.33 | 1090.22 | 7382.7 | 4    | 1099.9 | 83.3 | 1  | K.STIQTAEALR.L                                                           |
| *                 | Hs293FLP-MG_Ti_203.356   | 3.8119 | 0.2663 | 3463.51 | 3463.7  | 5932.7 | 1    | 833.8  | 27.7 | 1  | K.ALNEIDAGVCEELTYEEIRDTYPEEYALR.E                                        |
| *                 | Hs293FLP-MG_Ti_202.213   | 4.2093 | 0.3536 | 1556.53 | 1556.67 | 7703.1 | 1    | 1084.4 | 66.7 | 2  | R.YPTGESYQDLVQR.L                                                        |
| *                 | Hs293FLP_Ti_305.1367.13  | 4.0879 | 0.2434 | 1497.94 | 1497.69 | 5219.1 | 1    | 961    | 73.1 | 1  | R.RNSVTPLASPEPTK.K                                                       |
| gi 4506661 ref NF |                          | 11     | 37     | 0.282   | 266     | 29996  | 10.6 | U      |      |    | ribosomal protein L7a [Homo sapiens]                                     |
| gi 89047383 ref X |                          | 11     | 37     | 0.282   | 266     | 30042  | 10.6 | U      |      |    | PREDICTED: similar to 60S ribosomal protein L7a isoform 3 [Homo sapiens] |
| gi 89047128 ref X |                          | 11     | 37     | 0.282   | 266     | 30042  | 10.6 | U      |      |    | PREDICTED: similar to 60S ribosomal protein L7a isoform 1 [Homo sapiens] |
|                   | Hs293FLP_TREX_Ti_106.2   | 2.2821 | 0.3116 | 979.56  | 980.239 | 5746.7 | 1    | 635.5  | 61.1 | 2  | K.KVAPAPAVVK.K                                                           |
|                   | Hs293FLP_TREX_Ti_106.2   | 2.7953 | 0.2259 | 980.38  | 980.239 | 3474.9 | 5    | 599.6  | 77.8 | 1  | K.KVAPAPAVVK.K                                                           |
|                   | HsFLAG-MOCK_300mM_T      | 2.9488 | 0.3265 | 980.45  | 980.239 | 3792.8 | 6    | 622.6  | 77.8 | 1  | K.KVAPAPAVVK.K                                                           |
|                   | HsFLAG-Control_293_Ti_2( | 2.4671 | 0.2528 | 852.4   | 852.065 | 4300.6 | 1    | 524    | 68.8 | 14 | K.VAPAPAVVK.K                                                            |
|                   | Hs293FLP_TREX_Ti_102.1   | 3.3759 | 0.1809 | 1217.4  | 1217.37 | 5004   | 1    | 1151.8 | 85   | 2  | K.NFGIGQDIQPK.R                                                          |
|                   | HsFLAG-MOCK_300mM_T      | 4.1479 | 0.3958 | 1570.7  | 1570.79 | 4684.5 | 1    | 983.1  | 76.9 | 8  | K.VPPAINQFTQALDR.Q                                                       |
|                   | Hs293FLP_TREX_Ti_102.1   | 3.9664 | 0.3554 | 1345.7  | 1346.52 | 6059.4 | 1    | 1044.5 | 75   | 3  | R.AGVNTVTTLVENK.K                                                        |
|                   | Hs293FLP_TREX_Ti_103.1   | 3.5472 | 0.3606 | 1474.48 | 1474.7  | 5544.8 | 1    | 655    | 61.5 | 2  | R.AGVNTVTTLVENKK.A                                                       |
|                   | Hs293FLP_TREX_Ti_104.1   | 4.0049 | 0.3456 | 1828.88 | 1829.97 | 6597.2 | 1    | 1933.9 | 80   | 1  | R.KTCTTVAFTQVNSSEDK.G                                                    |
|                   | Hs293FLP_TREX_Ti_102.1   | 3.9068 | 0.272  | 1701.47 | 1701.79 | 5225   | 1    | 1130   | 75   | 1  | K.TCTTVAFTQVNSSEDK.G                                                     |
|                   | Hs293FLP_TREX_Ti_106.2   | 3.052  | 0.2801 | 1064.33 | 1065.22 | 4856.3 | 1    | 548.1  | 72.2 | 2  | R.HWGGNVLGPK.S                                                           |

|                   |                         |        |        |         |         |         |                                                                                 |        |      |                                            |
|-------------------|-------------------------|--------|--------|---------|---------|---------|---------------------------------------------------------------------------------|--------|------|--------------------------------------------|
| gi 5901926 ref NF | 6                       | 10     | 0.282  | 227     | 26227   | 8.8 U   | cleavage and polyadenylation specific factor 5 [Homo sapiens]                   |        |      |                                            |
| *                 | HsHeLa3_Ti_103.1947.194 | 4.0608 | 0.2043 | 1755.1  | 1753.9  | 4254.1  | 1                                                                               | 793.4  | 65.6 | 2 K.LPGGELNPGEDEVEGLK.R                    |
| *                 | HsHeLa3_Ti_106.2215.221 | 3.4467 | 0.1993 | 1090.45 | 1089.34 | 8198.8  | 1                                                                               | 1442.9 | 93.8 | 2 K.RLMTEILGR.Q                            |
| *                 | HsHeLa3_Ti_104.2353.235 | 2.9922 | 0.0934 | 1117.66 | 1118.36 | 8579.8  | 3                                                                               | 855.8  | 75   | 1 K.LFLVQLQEK.A                            |
| *                 | HsHeLa3_Ti_104.2345.234 | 3.4705 | 0.1549 | 1119.33 | 1118.36 | 4561.5  | 9                                                                               | 969.2  | 87.5 | 1 K.LFLVQLQEK.A                            |
| *                 | Hs293FLP-MG_Ti_204.495  | 4.6078 | 0.3517 | 3115.58 | 3116.63 | 10718.1 | 1                                                                               | 1347   | 27.7 | 1 K.LVAAPLFELYDNAPGYGPIISSLPQLLSR.F        |
| *                 | HsHeLa3_Ti_106.3480.348 | 3.6632 | 0.4239 | 3116.29 | 3116.63 | 4015.2  | 1                                                                               | 510.5  | 39.3 | 3 K.LVAAPLFELYDNAPGYGPIISSLPQLLSR.F        |
| gi 56788366 ref N | 12                      | 28     | 0.275  | 652     | 70755   | 7.9 U   | phosphatidylinositol-binding clathrin assembly protein isoform 1 [Homo sapiens] |        |      |                                            |
| gi 56788368 ref N | 12                      | 28     | 0.293  | 610     | 66393   | 8.8 U   | phosphatidylinositol-binding clathrin assembly protein isoform 2 [Homo sapiens] |        |      |                                            |
|                   | HsFLAG-Control_HeLa_NE  | 2.6836 | 0.2628 | 1456.43 | 1457.63 | 8205.5  | 1                                                                               | 507.4  | 50   | 1 R.ITAAQHSVTGSAVSK.T                      |
|                   | HsHeLa3_Ti_106.1827.182 | 3.3388 | 0.3985 | 1456.66 | 1457.63 | 5315.1  | 1                                                                               | 425.6  | 53.6 | 2 R.ITAAQHSVTGSAVSK.T                      |
|                   | HsFLAG-Control_HeLa_NE  | 4.623  | 0.4486 | 1457.6  | 1457.63 | 6593.8  | 1                                                                               | 1739.4 | 82.1 | 1 R.ITAAQHSVTGSAVSK.T                      |
|                   | HsHeLa3_Ti_105.1236.123 | 4.169  | 0.3575 | 1458.57 | 1457.63 | 6435.3  | 1                                                                               | 1243.9 | 71.4 | 2 R.ITAAQHSVTGSAVSK.T                      |
|                   | HsHeLa3_Ti_105.1262.126 | 2.5447 | 0.1789 | 1084.46 | 1085.26 | 5745.5  | 1                                                                               | 548.9  | 61.1 | 1 K.ATTHEIMGPK.K                           |
|                   | HsHeLa3_Ti_103.3474.347 | 4.279  | 0.3544 | 1428.27 | 1426.61 | 5766    | 1                                                                               | 1512.7 | 90.9 | 3 R.NTLFNLSNFLDK.S                         |
|                   | HsHeLa3_Ti_103.2522.252 | 4.0966 | 0.3566 | 1475.49 | 1475.66 | 5000.7  | 1                                                                               | 960.5  | 75   | 2 K.SGLQGYDMSTFIR.R                        |
|                   | HsHeLa3_Ti_103.3559.355 | 2.6762 | 0.4074 | 1708.9  | 1709    | 6802.2  | 1                                                                               | 621    | 53.6 | 1 R.LFAAYNEGIINLLEK.Y                      |
|                   | HsHeLa3_Ti_104.5048.504 | 5.0099 | 0.4158 | 3773.92 | 3774.18 | 10639.9 | 1                                                                               | 975.4  | 23.6 | 2 K.VAEQVGDGRGDIPDLSQAPSSLLDALEQHLASLEGK.K |
|                   | HsFLAG-Control_HeLa_NE  | 5.0189 | 0.4322 | 1922.69 | 1923.17 | 7309.9  | 1                                                                               | 1195.2 | 57.9 | 7 R.ATTLNAVSSLASTGLSLTK.V                  |
|                   | HsHeLa3_Ti_104.3239.323 | 6.4198 | 0.4391 | 3370.93 | 3370.78 | 6363.6  | 1                                                                               | 1162   | 30.5 | 1 K.STNVIVDSGGFDELGLLKPTVASQNNLPAK.L       |
|                   | HsHeLa3_Ti_102.4165.416 | 5.2235 | 0.3465 | 2474.24 | 2474.73 | 6047.2  | 1                                                                               | 1024.3 | 50   | 5 K.LVSDDLSSLANLVGNLIGNGTTK.N              |
| gi 4506411 ref NF | 10                      | 16     | 0.273  | 587     | 63542   | 4.7 U   | Ran GTPase activating protein 1 [Homo sapiens]                                  |        |      |                                            |
| *                 | HsFLAG-Control_HeLa_NE  | 2.8422 | 0.2774 | 1136.28 | 1136.29 | 4810.9  | 1                                                                               | 1019.9 | 85   | 1 K.TQVAGGQLSFK.G                          |
| *                 | HsFLAG-Control_HeLa_NE  | 3.1377 | 0.2427 | 1136.63 | 1136.29 | 8330.3  | 1                                                                               | 712.3  | 65   | 1 K.TQVAGGQLSFK.G                          |
| *                 | HsFLAG-Control_HeLa_NE  | 2.8936 | 0.1628 | 1216.44 | 1216.34 | 6430.8  | 1                                                                               | 864.2  | 77.3 | 1 R.LEGNTVGVEAAR.V                         |
|                   | HsFLAG-MOCK_300mM_T     | 5.0885 | 0.4962 | 4751.55 | 4751.43 | 6601.5  | 1                                                                               | 1080.9 | 23.9 | 2 QGFEALLK.S                               |
| *                 | HsFLAG-MOCK_300mM_T     | 2.9664 | 0.2059 | 1100.6  | 1100.3  | 5404.3  | 5                                                                               | 687.3  | 70   | 1 K.SSAQGKPLALK.V                          |
| *                 | HsFLAG-Control_HeLa_NE  | 3.6418 | 0.1133 | 1408.61 | 1408.55 | 6468.9  | 2                                                                               | 1049   | 77.3 | 2 R.VINLNDNTFTEK.G                         |
| *                 | HsFLAG-Control_HeLa_NE  | 3.724  | 0.2836 | 1551.31 | 1549.73 | 7982.3  | 1                                                                               | 1075.4 | 70.8 | 1 R.QVEVINFGDCLVR.S                        |
| *                 | HsFLAG-Control_HeLa_NE  | 4.9497 | 0.4261 | 1719.47 | 1719.84 | 7777.4  | 1                                                                               | 1794   | 73.3 | 2 K.SSVLIAQQTDTSDPEK.V                     |
| *                 | HsFLAG-Control_HeLa_NE  | 4.5405 | 0.4032 | 1694.6  | 1693.81 | 6999.3  | 1                                                                               | 1275.1 | 71.4 | 4 K.AFNSSSFNSNTFLTR.L                      |
| *                 | HsFLAG-MOCK_300mM_T     | 2.7156 | 0.1751 | 2578.8  | 2577.99 | 3933.9  | 1                                                                               | 250.1  | 32.6 | 1 K.ALAPLLLAFVTKPNSALESCSFAR.H             |
| gi 45827706 ref N | 7                       | 15     | 0.273  | 341     | 37671   | 8.5 U   | quaking homolog, KH domain RNA binding isoform HQK-5 [Homo sapiens]             |        |      |                                            |
| gi 45827712 ref N | 7                       | 15     | 0.292  | 319     | 35248   | 7.4 U   | quaking homolog, KH domain RNA binding isoform HQK-7B [Homo sapiens]            |        |      |                                            |
| gi 45827710 ref N | 7                       | 15     | 0.286  | 325     | 35978   | 6.2 U   | quaking homolog, KH domain RNA binding isoform HQK-7 [Homo sapiens]             |        |      |                                            |
| gi 45827708 ref N | 7                       | 15     | 0.292  | 319     | 35131   | 7.4 U   | quaking homolog, KH domain RNA binding isoform HQK-6 [Homo sapiens]             |        |      |                                            |
|                   | HsHeLa3_Ti_106.2839.283 | 3.7658 | 0.3327 | 2037.06 | 2036.32 | 4017.3  | 1                                                                               | 536.1  | 59.4 | 2 K.LMSSLPNFCGIFNHLER.L                    |
|                   | HsHeLa3_Ti_102.1590.159 | 2.7387 | 0.3095 | 1488.43 | 1488.57 | 4556.2  | 3                                                                               | 425.1  | 58.3 | 1 K.DMYNDTLNGSTEK.R                        |
|                   | HsHeLa3_Ti_102.1586.158 | 3.331  | 0.2613 | 1490    | 1488.57 | 8892.5  | 1                                                                               | 1426   | 75   | 3 K.DMYNDTLNGSTEK.R                        |
|                   | HsHeLa3_Ti_104.2264.226 | 5.0846 | 0.3568 | 1953.08 | 1951.23 | 6848.3  | 1                                                                               | 1535.1 | 67.6 | 4 K.RSAELPDVAVGPIVQLQEK.L                  |
|                   | HsHeLa3_Ti_104.3367.336 | 2.9227 | 0.2436 | 1653.98 | 1654    | 7167.2  | 1                                                                               | 643.6  | 53.8 | 2 K.MQLMELAILNGTYR.D                       |
|                   | HsHeLa3_Ti_105.2480.248 | 3.8611 | 0.3185 | 1644.87 | 1643.88 | 6480.3  | 1                                                                               | 1332.6 | 65.6 | 1 K.SPALAFSLAATAQAAPR.I                    |
|                   | HsHeLa3_Ti_106.2430.243 | 3.375  | 0.4031 | 1465.89 | 1465.79 | 5878.2  | 1                                                                               | 674.8  | 61.5 | 2 R.TPTPAGPTIMPLIR.Q                       |
| gi 5453543 ref NF | 7                       | 17     | 0.272  | 323     | 36788   | 7.9 U   | aldo-keto reductase family 1, member C1 [Homo sapiens]                          |        |      |                                            |
|                   | HsHeLa_Control-MG_Ti_20 | 4.9003 | 0.4852 | 2179.71 | 2180.39 | 7914.1  | 1                                                                               | 1927.1 | 69.4 | 1 R.HIDSAHLYNNEEQVGLAIR.S                  |
|                   | HsHeLa_Control-MG_Ti_20 | 2.9992 | 0.1893 | 1158.57 | 1159.28 | 8800.5  | 1                                                                               | 1327.5 | 87.5 | 2 K.REDIFYTSK.L                            |
|                   | HsHeLa_Control-MG_Ti_20 | 3.5613 | 0.3033 | 3126.24 | 3127.65 | 8920.1  | 1                                                                               | 466.9  | 32.7 | 4 K.NLQLDYVDLYLIHFPVSVKPGEEVIPK.D          |

|                   |                         |        |        |         |         |        |     |        |      |    |                                                           |
|-------------------|-------------------------|--------|--------|---------|---------|--------|-----|--------|------|----|-----------------------------------------------------------|
|                   | HsHeLa_Control-MG_Ti_20 | 5.8065 | 0.4856 | 3126.75 | 3127.65 | 6812.3 | 1   | 1504.3 | 35.6 | 6  | K.NLQLDYVDLYLIHFPVSVKPGEEVIPK.D                           |
|                   | HsHeLa_Control-MG_Ti_20 | 5.0274 | 0.436  | 3670.03 | 3671.19 | 7067.5 | 1   | 803.5  | 25.8 | 2  | K.NLQLDYVDLYLIHFPVSVKPGEEVIPKDENGK.I                      |
|                   | HsHeLa_Control-MG_Ti_20 | 2.6218 | 0.1304 | 1011.47 | 1011.26 | 4836.1 | 8   | 501.6  | 75   | 1  | K.RTPALIALR.Y                                             |
|                   | HsHeLa_Control-MG_Ti_20 | 3.2941 | 0.2454 | 2224.39 | 2223.44 | 8018.3 | 1   | 778.3  | 47.2 | 1  | R.YLTLDIFAGPPNYPFSDEY.-                                   |
| gi 34740329 ref N |                         | 9      | 17     | 0.267   | 378     | 39595  | 9   | U      |      |    | heterogeneous nuclear ribonucleoprotein A3 [Homo sapiens] |
|                   | HsGST-MOCK_Ti_102.247   | 3.6654 | 0.2381 | 2441.67 | 2442.69 | 4085.2 | 1   | 916.2  | 45   | 1  | K.LFIGGLSFETDDSLREHFEK.W                                  |
|                   | HsGST-MOCK_Ti_103.126   | 2.8392 | 0.2115 | 1381.44 | 1381.57 | 3984.4 | 5   | 468.1  | 70.8 | 1  | R.EDSVKPGAHLTVK.K                                         |
|                   | HsGST-MOCK_Ti_303.228   | 4.4364 | 0.3509 | 1883.8  | 1884.1  | 7735.5 | 1   | 1594   | 73.3 | 2  | K.IFVGGIKEDTEEYNLR.D                                      |
|                   | HsGST-MOCK_Ti_305.252   | 3.3382 | 0.3493 | 1870.41 | 1871.02 | 7264.3 | 2   | 564.3  | 50   | 1  | K.RGFAFVTFDDHDTVDK.I                                      |
|                   | HsGST-MOCK_Ti_103.179   | 4.4864 | 0.2692 | 1872.37 | 1871.02 | 8163.6 | 1   | 2203.2 | 51.7 | 1  | K.RGFAFVTFDDHDTVDK.I                                      |
|                   | HsGST-MOCK_Ti_303.270   | 3.998  | 0.4061 | 1715.11 | 1714.83 | 6098.4 | 1   | 1319.7 | 75   | 2  | R.GFAFVTFDDHDTVDK.I                                       |
|                   | HsGST-MOCK_Ti_104.111   | 3.7099 | 0.3367 | 1472.35 | 1472.57 | 6891.1 | 3   | 788.8  | 68.2 | 2  | K.YHTINGHNCEVK.K                                          |
|                   | HsGST-MOCK_Ti_105.108   | 3.2225 | 0.3178 | 1599.91 | 1600.74 | 9934.8 | 1   | 1133.1 | 66.7 | 2  | K.YHTINGHNCEVKK.A                                         |
| *                 | HsFLAG-MOCK_300mM_T     | 4.717  | 0.4394 | 1913.38 | 1911.9  | 6653.5 | 1   | 1242.4 | 59.5 | 5  | R.SGSPYGGYGGGGGGYGSR.R                                    |
| gi 22129784 ref N |                         | 3      | 14     | 0.266   | 184     | 20036  | 4.2 | U      |      |    | hypothetical protein LOC55352 [Homo sapiens]              |
| *                 | HsHeLa_Control-MG_Ti_20 | 4.7594 | 0.5052 | 1982.24 | 1983.06 | 3079.2 | 1   | 516.8  | 65.8 | 7  | R.GAPPSPEAGFATADHSGQER.E                                  |
| *                 | HsFLAG-Control_293_Ti_1 | 2.9311 | 0.3381 | 1922.58 | 1923    | 5161.4 | 3   | 214.2  | 40   | 5  | K.EQPGLFNEWDSELK.A                                        |
| *                 | HsFLAG-Control_293_Ti_2 | 2.6632 | 0.314  | 1503.28 | 1504.57 | 8142.6 | 1   | 760.5  | 58.3 | 2  | K.MVFETGQFDDAED.-                                         |
| gi 4507389 ref NF |                         | 26     | 137    | 0.264   | 772     | 87230  | 9.6 | U      |      |    | elongin A [Homo sapiens]                                  |
| *                 | Hs293FLP-MG_Ti_303.407  | 4.303  | 0.4089 | 1828.37 | 1828.16 | 3118.8 | 1   | 627.9  | 67.6 | 84 | K.LSTLPITVDILAETGVGK.T                                    |
| *                 | Hs293FLP-MG_Ti_306.211  | 2.8331 | 0.3941 | 1167.62 | 1168.3  | 4339.5 | 1   | 462.8  | 72.2 | 2  | R.KHEHVGSFAR.D                                            |
| *                 | Hs293FLP-MG_Ti_306.212  | 2.0705 | 0.1821 | 1039.79 | 1040.13 | 4957.4 | 1   | 436.8  | 75   | 2  | K.HEHVGSFAR.D                                             |
| *                 | Hs293FLP-MG_Ti_306.213  | 2.5152 | 0.2025 | 1040.01 | 1040.13 | 5215.6 | 2   | 573.6  | 75   | 1  | K.HEHVGSFAR.D                                             |
| *                 | Hs293FLP-MG_Ti_302.235  | 2.116  | 0.0884 | 859.63  | 860.001 | 6106   | 6   | 514.1  | 75   | 1  | R.DLVAQWK.K                                               |
| *                 | Hs293FLP-MG_Ti_304.149  | 3.2445 | 0.3182 | 2016.67 | 2016.17 | 6540.6 | 1   | 895.2  | 59.4 | 2  | K.LVPVERNAEPDEQDFEK.S                                     |
| *                 | Hs293FLP-MG_Ti_302.108  | 2.1255 | 0.0868 | 1321.31 | 1322.33 | 4654.7 | 7   | 329.2  | 60   | 2  | R.NAEPDEQDFEK.S                                           |
| *                 | Hs293FLP-MG_Ti_306.242  | 5.4759 | 0.4749 | 2230.25 | 2230.36 | 8971.3 | 1   | 1569.8 | 61.8 | 4  | R.DALQKEEEMEGDYQETWK.A                                    |
| *                 | Hs293FLP-MG_Ti_306.243  | 5.5374 | 0.3628 | 2231.05 | 2230.36 | 7768.2 | 1   | 2420.7 | 51.5 | 2  | R.DALQKEEEMEGDYQETWK.A                                    |
| *                 | Hs293FLP-MG_Ti_303.148  | 4.4584 | 0.3243 | 1674.59 | 1674.73 | 4752.9 | 1   | 1261.8 | 87.5 | 5  | K.EEEMEGDYQETWK.A                                         |
| *                 | Hs293FLP-MG_Ti_306.216  | 3.3979 | 0.1475 | 1236.99 | 1237.45 | 7070.1 | 1   | 1059.2 | 83.3 | 1  | R.KLSELERPHK.V                                            |
| *                 | Hs293FLP-MG_Ti_305.108  | 2.546  | 0.1354 | 1109.62 | 1109.27 | 6690.8 | 1   | 848.6  | 81.2 | 1  | K.LSELERPHK.V                                             |
| *                 | Hs293FLP-MG_Ti_302.125  | 4.5922 | 0.3561 | 1639.3  | 1639.76 | 6027.2 | 1   | 1358.9 | 80.8 | 2  | R.SLEEDQEPIVSHQK.P                                        |
| *                 | Hs293FLP-MG_Ti_304.126  | 4.1739 | 0.4296 | 1921.6  | 1922.1  | 5478.4 | 1   | 644.1  | 56.2 | 9  | R.SLEEDQEPIVSHQKPGK.G                                     |
| *                 | Hs293FLP-MG_Ti_304.067  | 3.2536 | 0.2212 | 971.39  | 970.033 | 4708.8 | 1   | 904.2  | 87.5 | 2  | R.RPPSGDNAR.E                                             |
| *                 | Hs293FLP-MG_Ti_305.118  | 3.1967 | 0.3832 | 1667.5  | 1667.83 | 5706.5 | 1   | 512.7  | 53.6 | 1  | K.KCLPPSEAASDNHLK.K                                       |
| *                 | Hs293FLP-MG_Ti_304.123  | 2.8668 | 0.2771 | 1539.28 | 1539.65 | 2941.6 | 1   | 214    | 57.7 | 5  | K.CLPPSEAASDNHLK.K                                        |
| *                 | Hs293FLP-MG_Ti_302.134  | 2.5715 | 0.3341 | 1068.22 | 1068.13 | 4731   | 5   | 423.6  | 72.2 | 1  | K.QGLDSFDTGK.G                                            |
| *                 | Hs293FLP-MG_Ti_302.141  | 2.1464 | 0.2446 | 1070.22 | 1068.13 | 2190.8 | 8   | 118.1  | 55.6 | 1  | K.QGLDSFDTGK.G                                            |
| *                 | Hs293FLP-MG_Ti_306.294  | 2.9361 | 0.2529 | 2300.27 | 2301.73 | 5152.4 | 1   | 966.1  | 57.5 | 1  | K.VPDVLPVLPDLPLPAIQANYR.P                                 |
| *                 | Hs293FLP-MG_Ti_302.149  | 4.4536 | 0.5056 | 1743.77 | 1742.8  | 6691.6 | 1   | 1118.1 | 66.7 | 2  | K.AFSSPQEEEEAGFTGR.R                                      |
| *                 | Hs293FLP-MG_Ti_306.235  | 2.7839 | 0.1216 | 1901.12 | 1901    | 4710.6 | 1   | 484.2  | 61.5 | 1  | R.DFKEERPEEYESWR.E                                        |
| *                 | Hs293FLP-MG_Ti_306.220  | 2.2804 | 0.162  | 1267.4  | 1268.46 | 3958.3 | 8   | 378.7  | 65   | 1  | K.NIQFAHANKPK.G                                           |
| *                 | Hs293FLP-MG_Ti_306.221  | 4.1602 | 0.2803 | 1269.42 | 1268.46 | 8000.2 | 2   | 1413   | 80   | 2  | K.NIQFAHANKPK.G                                           |
| *                 | Hs293FLP-MG_Ti_302.120  | 1.9601 | 0.1551 | 1033.32 | 1034.16 | 3293.5 | 3   | 258.6  | 60   | 1  | K.FGTGGAHVPEK.I                                           |
| *                 | Hs293FLP-MG_Ti_302.120  | 2.6989 | 0.1806 | 1034.58 | 1034.16 | 5189.5 | 1   | 753.8  | 80   | 1  | K.FGTGGAHVPEK.I                                           |
| gi 30089997 ref N |                         | 6      | 15     | 0.264   | 387     | 43236  | 6.1 | U      |      |    | actin-like 6A isoform 2 [Homo sapiens]                    |
| gi 4757718 ref NF |                         | 6      | 15     | 0.238   | 429     | 47461  | 5.6 | U      |      |    | actin-like 6A isoform 1 [Homo sapiens]                    |
| gi 30089999 ref N |                         | 6      | 15     | 0.264   | 387     | 43236  | 6.1 | U      |      |    | actin-like 6A isoform 2 [Homo sapiens]                    |
|                   | HsHeLa3_Ti_105.2366.236 | 4.4142 | 0.4789 | 2026.01 | 2026.27 | 3588.2 | 1   | 502.6  | 52.9 | 3  | K.SEASLHPVLMSEAPWNTR.A                                    |

|                   |                          |        |        |         |         |        |     |        |      |    |                                           |
|-------------------|--------------------------|--------|--------|---------|---------|--------|-----|--------|------|----|-------------------------------------------|
|                   | HsHeLa3_Ti_106.3010.301  | 5.3342 | 0.3715 | 2274.03 | 2274.65 | 5645.8 | 1   | 1080.6 | 61.8 | 2  | K.LTELMFEHYNIPAFFLCK.T                    |
|                   | HsFLAG-Control_HeLa_NE   | 3.5028 | 0.2438 | 1121.46 | 1121.28 | 7511.6 | 2   | 1395.7 | 85   | 1  | K.TAVLTAFANGR.S                           |
|                   | HsFLAG-Control_HeLa_NE   | 6.3223 | 0.3311 | 3093.16 | 3093.51 | 8853.3 | 1   | 1768.3 | 32.8 | 6  | R.STGLILDGATHHTTAIPVHDGYVLQQGIVK.S        |
|                   | HsHeLa3_Ti_103.2258.225  | 3.943  | 0.3834 | 1497.56 | 1496.69 | 6358.3 | 1   | 1507.8 | 79.2 | 2  | K.SPLAGDFITMQCR.E                         |
|                   | HsHeLa3_Ti_103.2158.215  | 2.8927 | 0.1078 | 1317.57 | 1316.5  | 3989.3 | 5   | 538.6  | 68.2 | 1  | K.IPEGLFDPSNVK.G                          |
| gi 29568109 ref N |                          | 37     | 113    | 0.263   | 1966    | 225146 | 7.7 | U      |      |    | dedicator of cytokinesis 4 [Homo sapiens] |
| *                 | HsFLAG-Control_293_Ti_2( | 3.4473 | 0.2339 | 1011.71 | 1012.2  | 5061.1 | 1   | 1291.5 | 87.5 | 5  | K.YGVVIASFR.G                             |
| *                 | HsFLAG-Control_293_Ti_1( | 4.3967 | 0.1738 | 2134.65 | 2133.45 | 7553.2 | 1   | 1276.7 | 60.5 | 3  | R.GTVPYGLSLEIGDTVQILEK.C                  |
| *                 | HsFLAG-Control_293_Ti_2( | 3.8412 | 0.2774 | 2484.37 | 2485.83 | 3891   | 1   | 348.3  | 42.9 | 2  | K.GQFEMVIPTEDSVITEMTSTLR.D                |
| *                 | HsFLAG-Control_293_Ti_2( | 4.7001 | 0.268  | 1725.01 | 1725.94 | 8194.4 | 1   | 1762.1 | 75   | 3  | R.LDWGNEQLGLDLVPR.K                       |
| *                 | HsFLAG-Control_293_Ti_1( | 4.0316 | 0.3367 | 1569.02 | 1569.71 | 8555.2 | 1   | 962.1  | 65.4 | 2  | R.EYSSVFSHGVSITR.K                        |
| *                 | HsFLAG-Control_293_Ti_2( | 3.1731 | 0.156  | 1137.07 | 1137.28 | 7829.6 | 2   | 1305.3 | 87.5 | 2  | R.NDLYITIER.G                             |
| *                 | HsFLAG-Control_293_Ti_2( | 3.4709 | 0.3552 | 1744.53 | 1744.02 | 4139.6 | 1   | 423.9  | 57.1 | 1  | K.LFGFSFVPLMQEDGR.T                       |
| *                 | HsFLAG-Control_293_Ti_2( | 2.4744 | 0.1138 | 1459.64 | 1460.67 | 5783.5 | 5   | 392.4  | 50   | 1  | R.TLPDGTHELIVHK.C                         |
| *                 | HsFLAG-Control_293_Ti_2( | 3.0856 | 0.1969 | 1460.65 | 1460.67 | 4235.5 | 2   | 464    | 70.8 | 1  | R.TLPDGTHELIVHK.C                         |
| *                 | HsFLAG-Control_293_Ti_2( | 2.3837 | 0.2734 | 1306.34 | 1307.51 | 5280   | 2   | 316.5  | 59.1 | 1  | K.GIFLGNNNQAMK.A                          |
| *                 | HsFLAG-Control_293_Ti_2( | 3.3908 | 0.2277 | 1306.98 | 1307.51 | 5680.8 | 1   | 796.9  | 72.7 | 1  | K.GIFLGNNNQAMK.A                          |
| *                 | HsFLAG-Control_MG_293_   | 3.5255 | 0.2882 | 1361.05 | 1361.6  | 8206   | 1   | 1221.3 | 77.3 | 1  | K.LTQNGDMLDLLK.W                          |
| *                 | HsFLAG-Control_293_Ti_2( | 4.4192 | 0.2327 | 2197.59 | 2198.43 | 7679   | 2   | 1427.8 | 41.7 | 1  | K.FLQDTLDTLFGILDENSQK.Y                   |
| *                 | HsFLAG-Control_293_Ti_1( | 4.7432 | 0.3459 | 2197.76 | 2198.43 | 8229.9 | 1   | 2477.6 | 66.7 | 9  | K.FLQDTLDTLFGILDENSQK.Y                   |
| *                 | HsFLAG-Control_293_Ti_2( | 3.0065 | 0.2585 | 1698.32 | 1698.83 | 4722.2 | 3   | 320    | 50   | 2  | R.LFSLATGGQNEEEFR.C                       |
| *                 | HsFLAG-Control_293_Ti_1( | 2.2516 | 0.0915 | 985.52  | 986.112 | 7157.5 | 4   | 587    | 78.6 | 3  | R.FFLSQESK.G                              |
| *                 | HsFLAG-Control_293_Ti_1( | 5.1626 | 0.4592 | 2587.94 | 2587.93 | 7955.9 | 1   | 1108.2 | 45.8 | 10 | K.GSGALSQSQAVFLSSFPVYSELLK.L              |
| *                 | HsFLAG-Control_293_Ti_1( | 4.1238 | 0.3532 | 2890.6  | 2891.29 | 7039.6 | 1   | 662.7  | 26   | 6  | R.EVANLVQDTLGSPLTLHVDDSLQAIK.L            |
| *                 | HsFLAG-Control_293_Ti_1( | 3.013  | 0.2291 | 1207.51 | 1207.47 | 5306.7 | 1   | 819.8  | 83.3 | 1  | R.ILSNVFLIK.K                             |
| *                 | HsFLAG-Control_293_Ti_2( | 3.4453 | 0.3059 | 1873.89 | 1875.15 | 6742.8 | 2   | 319.2  | 43.8 | 1  | R.TILEITSRPQPSSSAMR.F                     |
| *                 | HsFLAG-Control_293_Ti_1( | 4.6914 | 0.5072 | 2245.37 | 2244.56 | 6954.4 | 1   | 1247.6 | 61.1 | 2  | R.FQFQDVTGEFVACLSSLR.Q                    |
| *                 | HsFLAG-Control_293_Ti_1( | 4.9876 | 0.3533 | 2088.64 | 2089.48 | 7988.4 | 1   | 1737.4 | 61.1 | 4  | R.LVANNVIITTVLYLSDALR.K                   |
| *                 | HsFLAG-Control_MG_293_   | 3.8185 | 0.2649 | 1233.41 | 1233.41 | 7377.6 | 1   | 1425.7 | 81.8 | 6  | R.ESGVSIATVTR.L                           |
| *                 | HsFLAG-Control_293_Ti_2( | 3.4468 | 0.2907 | 1415.83 | 1415.64 | 5111.8 | 1   | 855.2  | 77.3 | 2  | K.IGCTVSLLNFK.T                           |
| *                 | HsFLAG-Control_293_Ti_2( | 3.3739 | 0.3606 | 1730.38 | 1728.86 | 5297.6 | 1   | 883.9  | 70.8 | 2  | R.KIAEQYESYYDYR.N                         |
| *                 | HsFLAG-Control_293_Ti_2( | 4.2067 | 0.2077 | 1534.1  | 1534.8  | 6408.1 | 1   | 1040   | 69.2 | 5  | R.TSLYLVQSLPGISR.W                        |
| *                 | HsFLAG-Control_293_Ti_2( | 4.7316 | 0.2884 | 2044.38 | 2044.33 | 6770.6 | 1   | 955.3  | 58.8 | 12 | R.EVVEMSPLENAIEVLENK.N                    |
| *                 | HsFLAG-Control_293_Ti_2( | 2.7662 | 0.1347 | 1107.24 | 1107.22 | 4662.9 | 1   | 852.4  | 87.5 | 3  | K.TLISQCQTR.Q                             |
| *                 | HsFLAG-Control_MG_293_   | 2.7745 | 0.2957 | 1259.15 | 1259.32 | 5606.8 | 1   | 580.4  | 62.5 | 1  | R.NSAPASVSPDGTR.V                         |
| *                 | HsFLAG-Control_293_Ti_2( | 3.5493 | 0.329  | 1259.98 | 1260.44 | 7213.2 | 1   | 1089.4 | 80   | 4  | R.RSPLSYPAVNR.Y                           |
| *                 | HsFLAG-Control_MG_293_   | 2.8675 | 0.1382 | 1104.58 | 1104.25 | 6745.7 | 2   | 775.8  | 72.2 | 1  | R.SPLSYPAVNR.Y                            |
| *                 | HsFLAG-Control_293_Ti_2( | 4.9764 | 0.3675 | 1988.5  | 1988.17 | 8121.6 | 1   | 1060.8 | 62.5 | 6  | R.ERPCSAIYPTPVEPSQR.M                     |
| *                 | HsFLAG-Control_MG_293_   | 2.8078 | 0.21   | 1196.37 | 1197.29 | 5152.1 | 2   | 317.1  | 63.6 | 1  | R.HTTSVSPSPAGR.S                          |
| *                 | HsFLAG-Control_293_Ti_2( | 2.5641 | 0.2936 | 1196.68 | 1197.29 | 6530.9 | 2   | 844.7  | 68.2 | 1  | R.HTTSVSPSPAGR.S                          |
| *                 |                          |        |        |         |         |        |     |        |      |    | K.GSVQSFPTSPVEYHSPGLISNSPVLSGSYSSGISLS    |
| *                 | Hs293FLP_Ti_305.2753.27  | 5.6418 | 0.4178 | 3872.94 | 3870.22 | 4448.8 | 1   | 593.2  | 25   | 3  | R.C                                       |
| *                 |                          |        |        |         |         |        |     |        |      |    | R.CSTSETSGFENQVNEQSAPLPVVPVPSYGGEEP       |
| *                 | HsFLAG-Control_293_Ti_1( | 5.4011 | 0.4492 | 4172.9  | 4171.53 | 9382.6 | 1   | 916.7  | 23.7 | 3  | VRK.E                                     |
| *                 | HsFLAG-Control_293_Ti_2( | 1.9018 | 0.1465 | 1208.35 | 1209.34 | 3194.9 | 3   | 152.8  | 61.1 | 1  | K.TPPYSVYER.T                             |
| gi 4504183 ref NF |                          | 6      | 14     | 0.262   | 210     | 23356  | 5.6 | U      |      |    | glutathione transferase [Homo sapiens]    |
| *                 | HsHeLa_Control-MG_Ti_20  | 5.1778 | 0.4105 | 1887.01 | 1885.08 | 7365.5 | 1   | 1485.6 | 73.3 | 2  | K.FQDGLTLYQSNTILR.H                       |
| *                 | HsHeLa_Control-MG_Ti_20  | 4.2329 | 0.4337 | 2126.73 | 2127.45 | 4940.4 | 1   | 868.6  | 63.2 | 4  | K.ALPGQLKPFETLLSQNQQGK.T                  |
| *                 | HsHeLa_Control-MG_Ti_20  | 4.3167 | 0.2326 | 2127.47 | 2127.45 | 7401.6 | 1   | 1226.4 | 39.5 | 1  | K.ALPGQLKPFETLLSQNQQGK.T                  |

|                   |                          |        |        |         |         |        |     |        |      |    |                                                                   |
|-------------------|--------------------------|--------|--------|---------|---------|--------|-----|--------|------|----|-------------------------------------------------------------------|
| *                 | Hs293FLP_Ti_306.2891.28  | 3.6957 | 0.4217 | 2130.13 | 2127.45 | 3499.8 | 1   | 547.6  | 57.9 | 2  | K.ALPGQLKPFETLLSQNQGGK.T                                          |
| *                 | HsHeLa_Control-MG_Ti_20  | 3.9949 | 0.354  | 1905.51 | 1905.16 | 6451.6 | 1   | 1201.7 | 61.8 | 1  | K.AFLASPEYVNLPIPINGNK.Q                                           |
| *                 | HsHeLa_Control-MG_Ti_20  | 4.0492 | 0.388  | 2033.79 | 2033.29 | 6251.6 | 1   | 1095.1 | 63.9 | 4  | K.AFLASPEYVNLPIPINGNKQ.-                                          |
| gi 4503475 ref NF |                          | 36     | 156    | 0.261   | 463     | 50470  | 9   | U      |      |    | eukaryotic translation elongation factor 1 alpha 2 [Homo sapiens] |
|                   | HsGST-MOCK_Ti_105.161    | 5.0627 | 0.3697 | 1589.75 | 1589.84 | 7575.5 | 1   | 2410.8 | 82.1 | 28 | K.THINIVVIGHVDSGK.S                                               |
|                   | HsHeLa_Control-MG_Ti_20  | 2.1168 | 0.0805 | 1120.6  | 1121.28 | 4071.8 | 2   | 445.4  | 66.7 | 1  | K.STTTGHLIYK.C                                                    |
|                   | HsFLAG-Control_HeLa_NE   | 3.2571 | 0.3469 | 1121.08 | 1121.28 | 8100.5 | 1   | 1088.6 | 72.2 | 19 | K.STTTGHLIYK.C                                                    |
|                   | HsFLAG-Control_293_Ti_2  | 3.0545 | 0.334  | 1121.22 | 1121.28 | 8815.4 | 1   | 1167   | 77.8 | 9  | K.STTTGHLIYK.C                                                    |
|                   | HsGST-MOCK_Ti_102.404    | 3.739  | 0.3542 | 2910.16 | 2911.26 | 7190.7 | 1   | 546.8  | 32.1 | 2  | K.NMITGTSQADCAVLIVAAGVGEFEAGISK.N                                 |
|                   | HsGST-MOCK_Ti_303.534    | 4.7274 | 0.3861 | 2912.77 | 2911.26 | 8229.7 | 1   | 1623.9 | 33   | 4  | K.NMITGTSQADCAVLIVAAGVGEFEAGISK.N                                 |
|                   | HsGST-MOCK_Ti_405.245    | 2.884  | 0.275  | 1314.28 | 1315.56 | 3797.5 | 1   | 422.1  | 63.6 | 2  | R.EHALLAYTLGVK.Q                                                  |
|                   | Hs293FLP-MG_Ti_204.231   | 3.1474 | 0.3715 | 1314.52 | 1315.56 | 6113   | 1   | 627.9  | 63.6 | 1  | R.EHALLAYTLGVK.Q                                                  |
|                   | HsFLAG-Control_HeLa_NE   | 3.8894 | 0.3764 | 1314.54 | 1315.56 | 7099.1 | 1   | 843.2  | 68.2 | 1  | R.EHALLAYTLGVK.Q                                                  |
|                   | HsFLAG-Control_HeLa_S1   | 3.3633 | 0.3249 | 1314.54 | 1315.56 | 6442.6 | 1   | 682.8  | 63.6 | 1  | R.EHALLAYTLGVK.Q                                                  |
|                   | HsHeLa3_Ti_105.2226.222  | 3.7276 | 0.3842 | 1314.65 | 1315.56 | 5432.8 | 1   | 771    | 68.2 | 6  | R.EHALLAYTLGVK.Q                                                  |
|                   | HsGST-MOCK_Ti_405.244    | 3.0462 | 0.2235 | 1314.83 | 1315.56 | 6532.9 | 2   | 861.4  | 72.7 | 2  | R.EHALLAYTLGVK.Q                                                  |
|                   | HsHeLa_Control-MG_Ti_10  | 3.4703 | 0.3478 | 1314.83 | 1315.56 | 5679.7 | 1   | 655    | 63.6 | 2  | R.EHALLAYTLGVK.Q                                                  |
|                   | HsFLAG-Control_HeLa_S1   | 4.0957 | 0.3505 | 1315.1  | 1315.56 | 6796.4 | 1   | 1542.9 | 86.4 | 7  | R.EHALLAYTLGVK.Q                                                  |
|                   | HsFLAG-Control_HeLa_S1   | 3.3605 | 0.3219 | 1315.28 | 1315.56 | 7637   | 1   | 1057.6 | 72.7 | 3  | R.EHALLAYTLGVK.Q                                                  |
|                   | HsGST-MOCK_Ti_305.236    | 3.3426 | 0.261  | 1315.47 | 1315.56 | 3468.6 | 1   | 431.4  | 68.2 | 3  | R.EHALLAYTLGVK.Q                                                  |
|                   | HsGST-MOCK_Ti_305.236    | 3.4506 | 0.2703 | 1315.48 | 1315.56 | 5538.1 | 1   | 959.1  | 81.8 | 7  | R.EHALLAYTLGVK.Q                                                  |
|                   | HsFLAG-Control_HeLa_NE   | 3.1986 | 0.3053 | 1315.53 | 1315.56 | 6457.5 | 2   | 1086.8 | 77.3 | 2  | R.EHALLAYTLGVK.Q                                                  |
|                   | HsFLAG-Control_HeLa_S1   | 3.6587 | 0.3109 | 1315.58 | 1315.56 | 6360.4 | 2   | 555.9  | 59.1 | 3  | R.EHALLAYTLGVK.Q                                                  |
|                   | HsHeLa3_Ti_105.2218.221  | 3.3286 | 0.2525 | 1316.68 | 1315.56 | 6114.4 | 2   | 1130.5 | 81.8 | 2  | R.EHALLAYTLGVK.Q                                                  |
|                   | HsHeLa_Control-MG_Ti_10  | 3.3203 | 0.2631 | 1316.86 | 1315.56 | 6340.9 | 1   | 1163.7 | 81.8 | 6  | R.EHALLAYTLGVK.Q                                                  |
|                   | HsGST-MOCK_Ti_102.183    | 2.8304 | 0.2663 | 1317.2  | 1315.56 | 6447.2 | 1   | 1041.9 | 77.3 | 1  | R.EHALLAYTLGVK.Q                                                  |
|                   | Hs293FLP_Ti_306.2670.26  | 3.2917 | 0.2924 | 1342.8  | 1342.62 | 4781.3 | 1   | 708    | 75   | 11 | K.PLRPLQDVYK.I                                                    |
|                   | HsHeLa_Control_Ti_106.31 | 3.1476 | 0.2914 | 1342.85 | 1342.62 | 5204.3 | 1   | 841.7  | 75   | 4  | K.PLRPLQDVYK.I                                                    |
|                   | HsHeLa3_Ti_106.2360.236  | 4.1661 | 0.2161 | 1343.33 | 1342.62 | 6881.1 | 1   | 1536.8 | 60   | 2  | K.PLRPLQDVYK.I                                                    |
|                   | HsGST-MOCK_Ti_102.184    | 4.1506 | 0.2292 | 1343.6  | 1342.62 | 6531.1 | 1   | 1475   | 57.5 | 2  | K.PLRPLQDVYK.I                                                    |
|                   | Hs293FLP-MG_Ti_204.174   | 1.8645 | 0.2129 | 1025.5  | 1026.22 | 4916.9 | 7   | 205.7  | 55   | 1  | K.IGGIGTVPVGR.V                                                   |
|                   | Hs293FLP-MG_Ti_304.147   | 1.8582 | 0.2752 | 1025.51 | 1026.22 | 4087.8 | 7   | 177.1  | 55   | 1  | K.IGGIGTVPVGR.V                                                   |
|                   | HsFLAG-Control_Hela_Ti_1 | 1.9211 | 0.1678 | 1025.52 | 1026.22 | 5051.1 | 4   | 266.3  | 60   | 1  | K.IGGIGTVPVGR.V                                                   |
|                   | HsFLAG-Control_293_Ti_2  | 2.1086 | 0.236  | 1025.57 | 1026.22 | 5224.8 | 4   | 263.8  | 60   | 2  | K.IGGIGTVPVGR.V                                                   |
|                   | HsFLAG-Control_293_Ti_2  | 3.6738 | 0.3122 | 1026.38 | 1026.22 | 5169   | 4   | 914.7  | 85   | 3  | K.IGGIGTVPVGR.V                                                   |
|                   | HsFLAG-Control_MG_293_   | 3.7743 | 0.2639 | 1026.42 | 1026.22 | 5236.3 | 5   | 894.4  | 80   | 1  | K.IGGIGTVPVGR.V                                                   |
|                   | HsFLAG-Control_HeLa_S1   | 3.4654 | 0.1423 | 1026.43 | 1026.22 | 4798.2 | 8   | 804.6  | 80   | 13 | K.IGGIGTVPVGR.V                                                   |
|                   | HsHeLa3_Ti_105.1615.161  | 3.0073 | 0.2554 | 1027.39 | 1026.22 | 4582.7 | 6   | 778.6  | 80   | 1  | K.IGGIGTVPVGR.V                                                   |
| *                 | HsHeLa3_Ti_106.2719.272  | 3.7293 | 0.1894 | 2575.54 | 2573.07 | 5594.7 | 1   | 496.6  | 41.3 | 1  | R.VETGILRPGMVVTFAPVNITTEVK.S                                      |
|                   | HsFLAG-Control_293_Ti_1  | 2.1166 | 0.1645 | 914.48  | 915.121 | 2775.6 | 1   | 178.6  | 75   | 1  | R.QTVAVGVIIK.N                                                    |
| gi 4505763 ref NF |                          | 8      | 16     | 0.261   | 417     | 44615  | 8.1 | U      |      |    | phosphoglycerate kinase 1 [Homo sapiens]                          |
| *                 | HsHeLa3_Ti_103.2194.219  | 2.6676 | 0.2936 | 1247.73 | 1248.46 | 6158   | 1   | 560.5  | 65   | 2  | K.YSLEPVAVELK.S                                                   |
| *                 | HsHeLa3_Ti_103.2195.219  | 3.1194 | 0.2164 | 1248.59 | 1248.46 | 3694.1 | 1   | 890.4  | 85   | 6  | K.YSLEPVAVELK.S                                                   |
| *                 | HsHeLa3_Ti_103.2951.295  | 3.4224 | 0.3007 | 1770.24 | 1770.01 | 6174.7 | 1   | 955.6  | 59.4 | 1  | K.ACANPAAGSVILLENLR.F                                             |
|                   | HsHeLa3_Ti_106.2670.267  | 3.9033 | 0.1576 | 1772.39 | 1770.08 | 7084.2 | 1   | 1132   | 62.5 | 2  | K.ALESPERPFLAILGGAK.V                                             |
|                   | HsHeLa3_Ti_103.2208.221  | 2.6385 | 0.0975 | 1201.74 | 1202.46 | 6867   | 4   | 596.2  | 72.2 | 1  | K.IQLINMLDK.V                                                     |
| *                 | HsHeLa3_Ti_103.2667.266  | 4.0074 | 0.4699 | 2477.88 | 2478.7  | 2724.7 | 1   | 514.7  | 52.1 | 2  | K.TGQATVASGIPAGWMGLDCGPESK.K                                      |
| *                 | HsHeLa3_Ti_106.3127.313  | 4.3862 | 0.4102 | 2108.57 | 2106.39 | 7434.4 | 1   | 894.8  | 55.9 | 1  | K.QIVWNGPVGVFEWEAFAR.G                                            |
| *                 | HsHeLa3_Ti_102.2969.296  | 3.1607 | 0.1704 | 1098.39 | 1098.29 | 6031.7 | 2   | 1083.9 | 75   | 1  | K.VLPGVDALSNI.-                                                   |

|                   |                          |        |        |         |         |         |                                                                                      |
|-------------------|--------------------------|--------|--------|---------|---------|---------|--------------------------------------------------------------------------------------|
| gij33239451 ref N | 4                        | 14     | 0.261  | 261     | 28769   | 4.7 U   | proliferating cell nuclear antigen [Homo sapiens]                                    |
| gij4505641 ref NF | 4                        | 14     | 0.261  | 261     | 28769   | 4.7 U   | proliferating cell nuclear antigen [Homo sapiens]                                    |
|                   | HsFLAG-Control_293_Ti_20 | 2.8521 | 0.1951 | 1366.81 | 1366.63 | 8779.4  | 1 789.7 58.3 1 R.NLAMGVNLTSMK.I                                                      |
|                   | HsHeLa_Control-MG_Ti_20  | 5.1097 | 0.3937 | 2076.54 | 2076.22 | 7084.7  | 1 1415.9 61.1 8 R.AEDNADTLALVFEAPNQEK.V                                              |
|                   | HsHeLa3_Ti_102.3375.337  | 4.1306 | 0.3896 | 2468.65 | 2466.77 | 4724.2  | 1 392.8 42.5 1 K.LMDLDVEQLGIPEQEYSCVVK.M                                             |
|                   | Hs293FLP_TREX_Ti_104.1   | 4.0942 | 0.4064 | 1584.81 | 1585.76 | 4665    | 1 995 71.4 4 R.DLSHIGDAVVISCAK.D                                                     |
| gij4502565 ref NF | 5                        | 14     | 0.261  | 268     | 28316   | 5.2 U   | calpain, small subunit 1 [Homo sapiens]                                              |
| gij51599151 ref N | 5                        | 14     | 0.261  | 268     | 28316   | 5.2 U   | calpain, small subunit 1 [Homo sapiens]                                              |
|                   | HsFLAG-Control_HeLa_S10  | 3.2429 | 0.2686 | 2449.11 | 2448.78 | 10209.7 | 3 568.2 32.6 2 R.ILGGVISAISEAAAQYNPEPPPPR.T                                          |
|                   | HsFLAG-Control_HeLa_S10  | 5.1388 | 0.5263 | 2449.75 | 2448.78 | 8852.2  | 1 1304.6 34.8 1 R.ILGGVISAISEAAAQYNPEPPPPR.T                                         |
|                   | HsHeLa3_Ti_103.4710.471  | 6.3246 | 0.4897 | 2524.98 | 2524.91 | 7186.4  | 1 1716 59.1 7 R.LFAQLAGDDMEVSATELMNILNK.V                                            |
|                   | HsHeLa3_Ti_102.1675.167  | 2.9482 | 0.2233 | 1143.09 | 1142.18 | 4526.2  | 2 870.5 83.3 2 K.TDGFIDTCR.S                                                         |
|                   | HsHeLa3_Ti_102.1681.168  | 3.3344 | 0.4459 | 1342.58 | 1342.52 | 5842    | 1 601.2 62.5 2 R.SMVAVMDSDTTGK.L                                                     |
| gij4507791 ref NF | 2                        | 4      | 0.257  | 183     | 20900   | 7.7 U   | ubiquitin-conjugating enzyme E2M [Homo sapiens]                                      |
| *                 | HsFLAG-Control_HeLa_NE   | 3.8067 | 0.2958 | 1888.46 | 1888    | 5270    | 1 655.2 63.3 3 K.TCDISFSDPDDLNFK.L                                                   |
| *                 | HsFLAG-Control_HeLa_S10  | 3.9234 | 0.1784 | 3660.75 | 3661.19 | 7672.9  | 1 575 23.3 1 R.EDWKPVLINSIIYGLQYLFLEPNPEDPLNK.E                                      |
| gij5032057 ref NF | 2                        | 5      | 0.257  | 105     | 11740   | 7.2 U   | S100 calcium binding protein A11 (calgizzarin) [Homo sapiens]                        |
| *                 | HsHeLa3_Ti_104.3125.312  | 3.4736 | 0.2526 | 1308.73 | 1308.53 | 6685.1  | 1 1705.1 85 1 R.CIESLIAVFQK.Y                                                        |
| *                 | HsHeLa3_Ti_105.4138.413  | 4.6065 | 0.4041 | 1851.71 | 1851.12 | 6563.4  | 1 1619.6 76.7 4 K.TEFLSFMNTELAFTK.N                                                  |
| gij21328448 ref N | 4                        | 21     | 0.256  | 246     | 28082   | 4.8 U   | tyrosine 3-monooxygenase/tryptophan 5-monooxygenase activation protein, beta polypep |
| gij4507949 ref NF | 4                        | 21     | 0.256  | 246     | 28082   | 4.8 U   | tyrosine 3-monooxygenase/tryptophan 5-monooxygenase activation protein, beta polypep |
|                   | HsFLAG-Control_HeLa_NE   | 4.9052 | 0.3502 | 1599.02 | 1599.65 | 7326.2  | 1 1394.3 73.1 8 K.AVTEQGHLSNEER.N                                                    |
|                   | HsHeLa3_Ti_102.1369.136  | 2.5882 | 0.2541 | 1182.57 | 1183.26 | 5609.1  | 1 592.1 65 2 R.YLSEVASGDNK.Q                                                         |
|                   | HsFLAG-Control_HeLa_S10  | 4.877  | 0.4949 | 2160.24 | 2160.3  | 9388.3  | 1 842.3 47.2 8 K.QTTVSNSQQAYQEAFEISK.K                                               |
|                   | HsFLAG-Control_HeLa_S10  | 4.6071 | 0.4862 | 2159.93 | 2160.3  | 8158.7  | 1 1604 61.1 3 K.TAFDEAIAELDTLNESYK.D                                                 |
| gij24234688 ref N | 12                       | 47     | 0.255  | 679     | 73681   | 6.2 U   | heat shock 70kDa protein 9B precursor [Homo sapiens]                                 |
| *                 | HsGST-MOCK_Ti_302.274    | 2.9292 | 0.1851 | 2081.13 | 2079.34 | 6853.9  | 2 473.7 45 1 K.GAVVGIDLGTNSCVAVMEGK.Q                                                |
| *                 | HsGST-MOCK_Ti_302.198    | 3.6786 | 0.448  | 1450.74 | 1451.58 | 4260    | 1 732.1 73.1 4 R.TTPSVVAFADGER.L                                                     |
| *                 | HsFLAG-Control_MG_293    | 5.0887 | 0.4515 | 1725.99 | 1725.9  | 11174.7 | 1 1144.2 60.7 10 K.RQAVTNPNTFFYATK.R                                                 |
| *                 | HsGST-MOCK_Ti_305.339    | 3.5852 | 0.203  | 1554.56 | 1554.89 | 6958.4  | 1 1500.7 76.9 3 K.LYSPSQIGAFVLMK.M                                                   |
| *                 | Hs293FLP_TREX_Ti_102.1   | 3.7357 | 0.3234 | 1244.77 | 1243.41 | 4761.9  | 1 957.2 77.3 5 K.DAGQISGLNVLR.V                                                      |
| *                 | HsGST-MOCK_Ti_302.317    | 5.3077 | 0.5153 | 2056.68 | 2057.18 | 6344.2  | 1 968.3 58.3 14 K.STNGDFTLGGEDFDQALLR.H                                              |
| *                 | HsHeLa_Control-MG_Ti_10  | 3.342  | 0.2842 | 1363.65 | 1362.57 | 5169.1  | 1 967.1 77.3 2 R.AQFEGIVTDLIR.R                                                      |
| *                 | HsGST-MOCK_Ti_302.276    | 3.5814 | 0.1915 | 1447.35 | 1447.69 | 5582.2  | 1 1275 73.1 1 K.SDIGEVILVGGMTR.M                                                     |
| *                 | HsGST-MOCK_Ti_303.224    | 3.852  | 0.2342 | 1291.29 | 1291.45 | 7825.9  | 1 1574.7 85 1 K.VQQTVDLDFGR.A                                                        |
| *                 | Hs293FLP_TREX_Ti_105.1   | 2.7979 | 0.1864 | 1674.29 | 1674.9  | 6864    | 1 663.3 57.1 2 K.VQQTVDLDFGRAPSK.A                                                   |
| *                 | HsHeLa_Control-MG_Ti_10  | 3.6207 | 0.2843 | 1595.25 | 1593.95 | 3729.1  | 1 623.2 64.3 3 K.LLGQFTLIGIPPAPR.G                                                   |
| *                 | HsGST-MOCK_Ti_302.243    | 5.3014 | 0.453  | 2418.95 | 2419.71 | 9181.3  | 1 1298.1 52.4 1 R.EQQIVIQSSGGLSKDDIENMVK.N                                           |
| gij23111030 ref N | 3                        | 7      | 0.253  | 162     | 18885   | 8.4 U   | sorting nexin 12 [Homo sapiens]                                                      |
| *                 | HsFLAG-MOCK_300mM_T      | 4.5804 | 0.2979 | 3761.81 | 3761.19 | 10014.3 | 1 836.1 23.5 2 R.RLNSKPQDLTDAYGPPSNFLEIDIFNPQTVGVGR.A                                |
| *                 | HsFLAG-Control_HeLa_NE   | 5.4798 | 0.4714 | 3602.9  | 3605    | 10241.6 | 1 1025.5 24.2 4 R.LNSKPQDLTDAYGPPSNFLEIDIFNPQTVGVGR.A                                |
|                   | HsFLAG-Control_HeLa_NE   | 2.2128 | 0.1182 | 832.59  | 833.018 | 4619.6  | 3 399.9 75 1 R.TNLPIFK.L                                                             |
| gij27363484 ref N | 9                        | 17     | 0.25   | 619     | 67498   | 5.2 U   | E74-like factor 1 (ets domain transcription factor) [Homo sapiens]                   |
| *                 | HsHeLa3_Ti_102.1185.118  | 4.5983 | 0.4378 | 1435.53 | 1434.5  | 4693.2  | 1 1296.2 84.6 2 K.YADSPGASSPEQPK.R                                                   |
| *                 | HsHeLa3_Ti_102.2505.250  | 3.5775 | 0.371  | 3088.02 | 3088.18 | 5650.5  | 1 618.5 37.5 1 K.DLIYINDEDPSSSISSDPSLSSSATSNR.N                                      |
| *                 | HsHeLa3_Ti_106.1844.184  | 2.4805 | 0.1712 | 1229.72 | 1230.41 | 5078.6  | 4 448.9 62.5 1 K.GGATTVLKPGNSK.A                                                     |
| *                 | HsHeLa3_Ti_105.1570.157  | 4.2587 | 0.4203 | 1887.86 | 1888.13 | 5200.3  | 1 856 58.8 2 R.TVHVVPVQAVPEGEAAR.T                                                   |
| *                 | HsHeLa3_Ti_102.1782.178  | 2.8069 | 0.2301 | 1898.68 | 1898.05 | 10014.9 | 1 589.4 40.6 1 R.TSTMQDETLNSSVQSIR.T                                                 |
| *                 | HsHeLa3_Ti_105.1886.188  | 2.2122 | 0.0979 | 1591.84 | 1592.88 | 2901.5  | 3 131.8 46.4 2 R.TIQAPTQVPVVVSPR.N                                                   |

|                   |                          |        |        |         |         |         |      |        |      |    |                                                                |
|-------------------|--------------------------|--------|--------|---------|---------|---------|------|--------|------|----|----------------------------------------------------------------|
| *                 | HsHeLa3_Ti_105.1894.189  | 3.7932 | 0.3377 | 1592.61 | 1592.88 | 5335.6  | 1    | 896    | 67.9 | 4  | R.TIQAPTQVPVVVSPR.N                                            |
| *                 | HsHeLa3_Ti_106.2530.253  | 3.6015 | 0.4191 | 3194.4  | 3195.55 | 5779.2  | 8    | 227.5  | 25   | 2  | R.NQQLHTVTLQTVPLTTVIASDPSAGTGSQK.F                             |
| *                 | HsHeLa3_Ti_106.2250.225  | 4.0554 | 0.3405 | 1836.32 | 1835.15 | 3653.7  | 1    | 390.2  | 50   | 2  | R.SSQLVAHPPGTVITSVIK.T                                         |
| gi 8922789 ref NF |                          | 8      | 41     | 0.249   | 357     | 41739   | 6.2  | U      |      |    | paraspeckle protein 1 [Homo sapiens]                           |
| *                 | HsHeLa_Control-Ti_102.30 | 3.5697 | 0.3497 | 1839.78 | 1839.05 | 3353.7  | 1    | 710.6  | 73.3 | 6  | R.LFVGNLPTDITEEDFK.R                                           |
| *                 | Hs283FLP_Ti_102.1735.17  | 3.9393 | 0.29   | 1312.48 | 1311.44 | 3967.6  | 1    | 831.9  | 85   | 3  | R.YGEPSEVFINR.D                                                |
| *                 | HsFlag1P_Ti_104.3420.342 | 5.3161 | 0.3377 | 1686.48 | 1686.99 | 6896.3  | 1    | 1713.1 | 73.3 | 4  | R.TLAEIAKAELDGTILK.S                                           |
| *                 | HsHeLa_Control-MG_Ti_20  | 2.4594 | 0.1527 | 1116.34 | 1116.31 | 4102.7  | 1    | 538.8  | 70   | 5  | R.FATHGAALTVK.N                                                |
| *                 | HsHeLa_Control-Ti_103.39 | 5.4072 | 0.448  | 2532.82 | 2533.84 | 8462.5  | 1    | 1437   | 52.3 | 10 | K.NLSPVVSNELLEQAFSQFGPVEK.A                                    |
| *                 | Hs293FLP_Ti_302.3986.39  | 5.1889 | 0.3989 | 2533.3  | 2533.84 | 7914    | 1    | 1280.2 | 50   | 4  | K.NLSPVVSNELLEQAFSQFGPVEK.A                                    |
| *                 | Hs283FLP_Ti_104.3241.32  | 3.9085 | 0.3429 | 2534.73 | 2533.84 | 7130.7  | 1    | 1014.3 | 33   | 2  | K.NLSPVVSNELLEQAFSQFGPVEK.A                                    |
| *                 | HsHeLa_Control-MG_Ti_10  | 3.7086 | 0.3118 | 1290.76 | 1290.51 | 5000.4  | 1    | 1073.4 | 81.8 | 7  | K.GFVEFAAKPPAR.K                                               |
| gi 12056465 ref N |                          | 5      | 15     | 0.249   | 321     | 33784   | 10.2 | U      |      |    | fibrillarin [Homo sapiens]                                     |
| *                 | Hs293FLP-MG_Ti_204.157   | 3.3432 | 0.2344 | 1667.6  | 1667.82 | 6549.7  | 1    | 731.9  | 61.5 | 1  | K.RVSISEGDDKIEYR.A                                             |
| *                 | Hs283FLP_Ti_106.2291.22  | 2.811  | 0.2422 | 1520.94 | 1519.83 | 6650.3  | 4    | 530.9  | 53.6 | 2  | K.LAAAILGGVDQIHIK.P                                            |
| *                 | Hs293FLP_Ti_306.2635.26  | 5.1735 | 0.4145 | 1874.91 | 1873.25 | 6428.9  | 1    | 1569.7 | 66.7 | 4  | K.LAAAILGGVDQIHIKPGAK.V                                        |
| *                 | HsHeLa_Control-MG_Ti_20  | 7.1087 | 0.465  | 3416.23 | 3418.83 | 8797.3  | 1    | 2261.4 | 34.4 | 7  | K.VLYLGAASGTTVSHVSDIVGPDGLVYAVEFSHR.S                          |
| *                 | HsHeLa_Control-MG_Ti_20  | 4.4997 | 0.3817 | 1536.67 | 1534.8  | 8037.3  | 1    | 2088.2 | 80.8 | 1  | R.DHAVVGVYRPPPK.V                                              |
| gi 62420888 ref N |                          | 8      | 22     | 0.248   | 492     | 54341   | 6.3  | U      |      |    | dipeptidyl peptidase 7 preproprotein [Homo sapiens]            |
| *                 | HsHeLa_Control-MG_Ti_20  | 3.4213 | 0.2527 | 1113.33 | 1113.31 | 7019.8  | 3    | 1221.1 | 83.3 | 3  | R.GALLVFAEHR.Y                                                 |
| *                 | HsHeLa_Control-MG_Ti_20  | 4.6734 | 0.3665 | 2226.72 | 2227.52 | 7173.3  | 1    | 1041.6 | 36.8 | 5  | R.GHTELLTVEQALADFAELLR.A                                       |
| *                 | HsHeLa_Control-MG_Ti_20  | 6.1305 | 0.5256 | 2226.76 | 2227.52 | 8400.5  | 1    | 2554.8 | 71.1 | 6  | R.GHTELLTVEQALADFAELLR.A                                       |
| *                 | HsHeLa_Control-MG_Ti_20  | 4.6441 | 0.5085 | 2914.63 | 2914.34 | 6039.9  | 1    | 963    | 48.2 | 3  | K.YPHLVAGALAASAPVLAVAGLSDSNQFFR.D                              |
| *                 | HsHeLa_Control-MG_Ti_20  | 2.5488 | 0.2689 | 1294.35 | 1294.36 | 7508    | 3    | 655.1  | 63.6 | 1  | R.DVTADFEGQSPK.C                                               |
| *                 | HsHeLa_Control-MG_Ti_20  | 3.6251 | 0.2452 | 1400.41 | 1398.56 | 7707.1  | 1    | 1838.8 | 81.8 | 2  | K.DLFLQGAYDTR.W                                                |
| *                 | HsHeLa_Control-MG_Ti_20  | 4.9421 | 0.4123 | 1935.25 | 1935.98 | 5590.1  | 1    | 1116.6 | 67.6 | 1  | R.LYHSCADPTGCGTGPDR.A                                          |
| *                 | HsHeLa_Control-MG_Ti_20  | 3.4405 | 0.1877 | 2133.56 | 2131.36 | 7904    | 1    | 1104.6 | 52.5 | 1  | R.AASNIIFSNGNLDPWAGGGIR.R                                      |
| gi 5453603 ref NF |                          | 15     | 53     | 0.245   | 535     | 57488   | 6.4  | U      |      |    | chaperonin containing TCP1, subunit 2 [Homo sapiens]           |
| *                 | HsFLAG-Control_HeLa_S1(  | 5.3655 | 0.2547 | 1518.27 | 1518.84 | 6651.2  | 1    | 1518.8 | 75   | 11 | R.LTSFIGAIAIGDLVK.S                                            |
| *                 | HsFLAG-Control_HeLa_S1(  | 4.6328 | 0.481  | 2287.51 | 2289.5  | 9878    | 1    | 1501.7 | 54.8 | 1  | R.VQDDEVDGTTSVTVLAAELLR.E                                      |
| *                 | HsFLAG-Control_HeLa_S1(  | 5.1171 | 0.46   | 2288.32 | 2289.5  | 8497    | 1    | 1344.1 | 54.8 | 1  | R.VQDDEVDGTTSVTVLAAELLR.E                                      |
| *                 | HsFLAG-Control_HeLa_S1(  | 5.5341 | 0.3774 | 2288.48 | 2289.5  | 10683.6 | 1    | 2192.4 | 41.7 | 3  | R.VQDDEVDGTTSVTVLAAELLR.E                                      |
| *                 | HsFLAG-Control_HeLa_S1(  | 4.088  | 0.3266 | 2288.72 | 2289.5  | 9855.9  | 1    | 1101.8 | 34.5 | 1  | R.VQDDEVDGTTSVTVLAAELLR.E                                      |
| *                 | HsFLAG-Control_HeLa_NE   | 5.2395 | 0.4922 | 2288.82 | 2289.5  | 7097.2  | 1    | 1538.8 | 59.5 | 11 | R.VQDDEVDGTTSVTVLAAELLR.E                                      |
| *                 | HsFLAG-Control_HeLa_NE   | 4.8632 | 0.307  | 2289.6  | 2289.5  | 8789.5  | 3    | 1360.5 | 36.9 | 2  | R.VQDDEVDGTTSVTVLAAELLR.E                                      |
| *                 | HsFLAG-Control_HeLa_S1(  | 5.4686 | 0.4188 | 2289.81 | 2289.5  | 7393    | 1    | 1221.8 | 54.8 | 5  | R.VQDDEVDGTTSVTVLAAELLR.E                                      |
| *                 | HsFLAG-Control_HeLa_NE   | 4.0232 | 0.3127 | 1657.4  | 1657.78 | 7946.4  | 1    | 1564.1 | 66.7 | 2  | R.EALLSSAVDHGSDEVK.F                                           |
| *                 | HsFLAG-Control_HeLa_S1(  | 3.1597 | 0.2403 | 1252.61 | 1252.46 | 6761.6  | 1    | 815.8  | 68.2 | 3  | K.GSGNLEAIIHK.K                                                |
| *                 | HsFLAG-Control_HeLa_S1(  | 2.72   | 0.3598 | 2043.98 | 2042.29 | 11257.5 | 1    | 917.9  | 47.2 | 1  | K.KLGGSLADSYLDEGFLLDK.K                                        |
| *                 | HsFLAG-Control_HeLa_NE   | 4.9889 | 0.4497 | 1913.5  | 1914.12 | 7094.3  | 1    | 1593   | 67.6 | 5  | K.LGGSLADSYLDEGFLLDK.K                                         |
| *                 | HsFLAG-Control_HeLa_S1(  | 5.4863 | 0.5067 | 2098.36 | 2098.4  | 7438.9  | 1    | 1072.8 | 55.3 | 2  | R.LALVTGGEIASTFDHPELVK.L                                       |
| *                 | HsFLAG-Control_HeLa_S1(  | 4.0485 | 0.1672 | 1332.18 | 1331.43 | 6934.2  | 1    | 1221.8 | 77.3 | 2  | R.GATQQILDEAER.S                                               |
| *                 | HsFLAG-Control_HeLa_S1(  | 4.3039 | 0.2907 | 1584.83 | 1583.87 | 9663.3  | 1    | 1903.1 | 75   | 3  | R.QVLLSAAEAAEVILR.V                                            |
| gi 89061568 ref X |                          | 6      | 14     | 0.245   | 367     | 39994   | 8.4  | U      |      |    | PREDICTED: similar to Ig gamma-2 chain C region [Homo sapiens] |
| *                 | HsHeLa3_Ti_106.2298.229  | 2.9503 | 0.2269 | 1288.79 | 1288.46 | 3622.9  | 8    | 436.8  | 63.6 | 1  | K.GPSVFPLAPCSR.S                                               |
| *                 | HsHeLa3_Ti_103.1803.180  | 4.0268 | 0.3434 | 1426.13 | 1424.56 | 8008.5  | 1    | 1242.1 | 69.2 | 1  | R.STSESTAALGCLVK.D                                             |
| *                 | HsHeLa3_Ti_106.2646.264  | 4.9068 | 0.3289 | 1795.25 | 1795.09 | 7269.1  | 2    | 1221.4 | 63.3 | 4  | R.VVSVLTVVHQDWLNGK.E                                           |
| *                 | HsHeLa3_Ti_104.1648.164  | 2.7077 | 0.2801 | 1907.07 | 1906.16 | 3939.2  | 3    | 306.7  | 50   | 2  | R.EPQVYTLPPSREEMTK.N                                           |



|                   |                          |        |        |         |         |         |      |        |      |    |                                                              |
|-------------------|--------------------------|--------|--------|---------|---------|---------|------|--------|------|----|--------------------------------------------------------------|
|                   | HsHeLa3_Ti_103.1878.187  | 2.5117 | 0.1298 | 1161.73 | 1162.34 | 4608.6  | 9    | 333.8  | 66.7 | 1  | K.NQVSLTCLVK.G                                               |
|                   | HsHeLa3_Ti_102.3109.310  | 3.9392 | 0.2322 | 2545.91 | 2545.68 | 7147    | 1    | 1278.7 | 54.8 | 5  | K.GFYPSDIAVEWESNGQPENNYK.T                                   |
| gj 24497583 ref N |                          | 5      | 6      | 0.245   | 323     | 36853   | 7.9  | U      |      |    | aldo-keto reductase family 1, member C3 [Homo sapiens]       |
|                   | HsHeLa_Control-MG_Ti_20  | 4.9003 | 0.4852 | 2179.71 | 2180.39 | 7914.1  | 1    | 1927.1 | 69.4 | 1  | R.HIDSAHLYNNEEQVGLAIR.S                                      |
|                   | HsHeLa_Control-MG_Ti_20  | 2.9992 | 0.1893 | 1158.57 | 1159.28 | 8800.5  | 1    | 1327.5 | 87.5 | 2  | K.REDIFYTSK.L                                                |
|                   | HsHeLa_Control-MG_Ti_20  | 3.6036 | 0.4104 | 2236.46 | 2237.57 | 7731.6  | 1    | 713.5  | 50   | 1  | R.WVDPNSPVLLEDPVLCALAK.K                                     |
|                   | HsHeLa_Control-MG_Ti_20  | 2.6218 | 0.1304 | 1011.47 | 1011.26 | 4836.1  | 8    | 501.6  | 75   | 1  | K.RTPALIALR.Y                                                |
| *                 | HsHeLa_Control-MG_Ti_20  | 4.215  | 0.3578 | 2667.46 | 2668.75 | 8686.6  | 1    | 1639.2 | 59.5 | 1  | R.NLHYFNSDSFASHPNYPYSDEY.-                                   |
| gj 4503285 ref NF |                          | 7      | 17     | 0.245   | 323     | 36735   | 7.5  | U      |      |    | aldo-keto reductase family 1, member C2 [Homo sapiens]       |
| gj 45446745 ref N |                          | 7      | 17     | 0.245   | 323     | 36735   | 7.5  | U      |      |    | aldo-keto reductase family 1, member C2 [Homo sapiens]       |
|                   | HsHeLa_Control-MG_Ti_20  | 2.9992 | 0.1893 | 1158.57 | 1159.28 | 8800.5  | 1    | 1327.5 | 87.5 | 2  | K.REDIFYTSK.L                                                |
|                   | HsHeLa_Control-MG_Ti_20  | 3.5613 | 0.3033 | 3126.24 | 3127.65 | 8920.1  | 1    | 466.9  | 32.7 | 4  | K.NLQLDYVDLYLIHFPVSVKPGEEVIPK.D                              |
|                   | HsHeLa_Control-MG_Ti_20  | 5.8065 | 0.4856 | 3126.75 | 3127.65 | 6812.3  | 1    | 1504.3 | 35.6 | 6  | K.NLQLDYVDLYLIHFPVSVKPGEEVIPK.D                              |
|                   | HsHeLa_Control-MG_Ti_20  | 5.0274 | 0.436  | 3670.03 | 3671.19 | 7067.5  | 1    | 803.5  | 25.8 | 2  | K.NLQLDYVDLYLIHFPVSVKPGEEVIPKDENGK.I                         |
|                   | HsHeLa_Control-MG_Ti_20  | 2.7478 | 0.1927 | 1131.26 | 1131.24 | 5414.4  | 2    | 790.2  | 77.8 | 1  | K.SIGVSNFNHR.L                                               |
|                   | HsHeLa_Control-MG_Ti_20  | 2.6218 | 0.1304 | 1011.47 | 1011.26 | 4836.1  | 8    | 501.6  | 75   | 1  | K.RTPALIALR.Y                                                |
|                   | HsHeLa_Control-MG_Ti_20  | 3.2941 | 0.2454 | 2224.39 | 2223.44 | 8018.3  | 1    | 778.3  | 47.2 | 1  | R.YLTLDIFAGPPNYPFSDEY.-                                      |
| gj 5032051 ref NF |                          | 5      | 10     | 0.245   | 151     | 16273   | 10.1 | U      |      |    | ribosomal protein S14 [Homo sapiens]                         |
| gj 68160922 ref N |                          | 5      | 10     | 0.245   | 151     | 16273   | 10.1 | U      |      |    | ribosomal protein S14 [Homo sapiens]                         |
| gj 68160915 ref N |                          | 5      | 10     | 0.245   | 151     | 16273   | 10.1 | U      |      |    | ribosomal protein S14 [Homo sapiens]                         |
|                   | Hs293FLP_TREX_Ti_105.2   | 2.6271 | 0.2763 | 1095.18 | 1095.33 | 4083.8  | 3    | 589.4  | 77.8 | 1  | K.ELGITALHIK.L                                               |
|                   | Hs293FLP_TREX_Ti_104.1   | 3.448  | 0.2489 | 1055.06 | 1055.18 | 6598.1  | 1    | 1286.1 | 85   | 3  | K.TPGGAQSALR.A                                               |
|                   | HsFLAG-Control_293_Ti_20 | 2.0317 | 0.1701 | 1055.36 | 1055.18 | 2871.1  | 4    | 127.9  | 55   | 1  | K.TPGGAQSALR.A                                               |
|                   | Hs293FLP-MG_Ti_105.119   | 3.1705 | 0.331  | 1055.6  | 1055.18 | 6369.1  | 6    | 654.2  | 65   | 4  | K.TPGGAQSALR.A                                               |
|                   | Hs293FLP_TREX_Ti_104.1   | 3.0484 | 0.2968 | 1756.71 | 1756.95 | 6353.1  | 1    | 709.8  | 56.7 | 1  | K.IGRIEDVTPIPSDSTR.R                                         |
| gj 33457332 ref N |                          | 9      | 13     | 0.243   | 606     | 63877   | 8.5  | U      |      |    | RAVER1 [Homo sapiens]                                        |
| *                 | HsHeLa3_Ti_103.3360.336  | 3.9154 | 0.2604 | 2345.54 | 2343.55 | 6853.6  | 1    | 742    | 47.5 | 2  | R.GLPGDVTNQEVHDLLSDYELK.Y                                    |
| *                 | HsHeLa3_Ti_105.3322.332  | 3.6561 | 0.1788 | 2546.37 | 2546.8  | 5149.3  | 2    | 786.5  | 34.8 | 1  | K.GTAFVTLNNGEQEAIAINAFHQSR.L                                 |
| *                 | HsHeLa3_Ti_105.3332.333  | 5.1732 | 0.4343 | 2547.86 | 2546.8  | 8546.9  | 1    | 1543.8 | 50   | 2  | K.GTAFVTLNNGEQEAIAINAFHQSR.L                                 |
| *                 | HsFLAG-MOCK_300mM_T      | 3.1702 | 0.1786 | 1353.03 | 1352.62 | 4752.6  | 4    | 793.8  | 66.7 | 2  | R.AKSDLLGKPLGPR.T                                            |
| *                 | HsFLAG-MOCK_300mM_T      | 3.4673 | 0.4168 | 2280.87 | 2280.59 | 9642.2  | 1    | 616.9  | 39.5 | 1  | R.TLYVHWTADAGQLTPALLHSR.C                                    |
| *                 | HsFLAG-MOCK_300mM_T      | 5.6805 | 0.3339 | 2281.8  | 2280.59 | 4437.6  | 1    | 1307.7 | 47.4 | 1  | R.TLYVHWTADAGQLTPALLHSR.C                                    |
| *                 | HsHeLa3_Ti_106.2228.223  | 5.4886 | 0.4529 | 2389.98 | 2389.6  | 5027.5  | 1    | 1016.2 | 57.1 | 1  | R.ALSAVHSPTFCQLACGQDGLK.G                                    |
| *                 | HsHeLa3_Ti_106.3022.302  | 3.6752 | 0.172  | 3311.37 | 3309.59 | 6008.4  | 1    | 567.4  | 23.3 | 1  | K.GFAVLEYETAEMAEAAQQQADGLSLGGSHLR.V                          |
| *                 | HsHeLa3_Ti_106.2947.294  | 4.2814 | 0.275  | 1616.58 | 1615.93 | 7198.5  | 1    | 2109.5 | 73.3 | 2  | R.SMLAALIAAQATALNR.G                                         |
| gj 57863257 ref N |                          | 11     | 51     | 0.243   | 556     | 60344   | 6.1  | U      |      |    | T-complex protein 1 isoform a [Homo sapiens]                 |
| *                 | HsFLAG-Control_MG_293_   | 4.293  | 0.3965 | 1517.41 | 1517.78 | 10541.9 | 1    | 2136.4 | 78.6 | 1  | R.SQNVMMAASIANIVK.S                                          |
| *                 | HsFLAG-Control_HeLa_S10  | 4.382  | 0.4322 | 1815.87 | 1816.1  | 7640.8  | 1    | 1483.5 | 67.6 | 4  | K.EVGDDGTTSVVIAAELLK.N                                       |
| *                 | HsFLAG-Control_HeLa_S10  | 4.3072 | 0.391  | 1764.35 | 1763.95 | 7623.7  | 1    | 1150.4 | 67.9 | 3  | R.YINENLIVNTDELGR.D                                          |
|                   | HsHeLa_Control-MG_Ti_20  | 2.7377 | 0.1445 | 1923.75 | 1924.25 | 7914.3  | 8    | 465.8  | 43.8 | 1  | K.LGVQVVITDPEKLDQIR.Q                                        |
|                   | Hs293FLP_TREX_Ti_102.2   | 3.7157 | 0.1836 | 1234.28 | 1232.43 | 4032.3  | 2    | 856.4  | 88.9 | 2  | R.ICDDELILIK.N                                               |
|                   | HsFLAG-Control_HeLa_S10  | 2.8846 | 0.2645 | 1142.43 | 1142.31 | 6093.3  | 1    | 845.9  | 77.8 | 1  | R.SLHDALCVVK.R                                               |
|                   | HsFLAG-Control_HeLa_NE   | 4.546  | 0.4054 | 2354.59 | 2354.71 | 4705.5  | 1    | 847.8  | 54.5 | 18 | R.SLLVIPNTLAVNAAQDSTDLVAK.L                                  |
|                   | HsFLAG-Control_293_Ti_20 | 4.8314 | 0.4184 | 2355.2  | 2354.71 | 5823.2  | 1    | 672.7  | 45.5 | 16 | R.SLLVIPNTLAVNAAQDSTDLVAK.L                                  |
|                   | HsFLAG-Control_HeLa_S10  | 5.5299 | 0.4921 | 2355.4  | 2354.71 | 8122    | 1    | 1722.5 | 40.9 | 2  | R.SLLVIPNTLAVNAAQDSTDLVAK.L                                  |
|                   | HsFLAG-Control_HeLa_S10  | 3.7923 | 0.2473 | 1412.11 | 1412.51 | 6624.7  | 1    | 1026   | 72.7 | 2  | R.AFHNEAQVNP.K                                               |
|                   | Hs293FLP_Ti_303.1401.14  | 3.2441 | 0.313  | 1572.49 | 1572.59 | 7796.7  | 1    | 1348.4 | 67.9 | 1  | K.HGSYEDAVHSGALND.-                                          |
| gj 38455427 ref N |                          | 9      | 35     | 0.243   | 539     | 57924   | 7.8  | U      |      |    | chaperonin containing TCP1, subunit 4 (delta) [Homo sapiens] |
|                   | HsFLAG-Control_HeLa_S10  | 1.9582 | 0.0864 | 837.53  | 837.951 | 6829.7  | 1    | 621.7  | 71.4 | 1  | R.FSNISAAK.A                                                 |

|                    |                           |        |        |         |         |         |   |        |      |    |                                                                                       |
|--------------------|---------------------------|--------|--------|---------|---------|---------|---|--------|------|----|---------------------------------------------------------------------------------------|
| *                  | HsFLAG-Control_HeLa_S1(   | 2.7041 | 0.1351 | 1150.37 | 1151.37 | 5981.6  | 1 | 1227.1 | 88.9 | 1  | K.QMQVLHPAAR.M                                                                        |
| *                  | HsFLAG-Control_HeLa_S1(   | 3.1262 | 0.305  | 2621.8  | 2622.85 | 10125.8 | 2 | 464.1  | 32   | 1  | K.AQDIEAGDGTTSVVIAGSLLDSC.TK.L                                                        |
| *                  | Hs293FLP_TREX_Ti_106.2    | 3.1994 | 0.3397 | 1457.43 | 1457.67 | 3792.4  | 1 | 500.1  | 70.8 | 2  | K.GIHPTIISESFQK.A                                                                     |
| *                  | HsFLAG-Control_HeLa_NE    | 4.0723 | 0.4088 | 1479.34 | 1479.63 | 8476.3  | 1 | 1445.7 | 73.1 | 5  | R.ETLLNSATTSLSNSK.V                                                                   |
| *                  | HsFLAG-Control_HeLa_NE    | 4.1746 | 0.4618 | 1358.55 | 1358.54 | 8187    | 1 | 1778.3 | 83.3 | 10 | K.VIDPATATSVDLR.D                                                                     |
| *                  | HsFLAG-Control_HeLa_S1(   | 4.0617 | 0.3375 | 2062.97 | 2061.3  | 7353.8  | 1 | 782.2  | 50   | 2  | K.LGGTIDDCELVEGLVLTQK.V                                                               |
| *                  | HsFLAG-Control_HeLa_NE    | 3.2128 | 0.1609 | 1349.34 | 1347.61 | 6048.2  | 9 | 660.4  | 63.6 | 2  | K.IGLIQFCLSAPK.T                                                                      |
| *                  | HsFLAG-Control_HeLa_S1(   | 4.3777 | 0.3891 | 1552.91 | 1551.83 | 4850.5  | 1 | 983.3  | 73.3 | 11 | R.ALIAGGGAPEIELALR.L                                                                  |
| gij 38045913 ref N |                           | 3      | 14     | 0.243   | 177     | 19654   |   |        |      |    | non-metastatic cells 1, protein (NM23A) expressed in isoform a [Homo sapiens]         |
| gij 4557797 ref NF |                           | 3      | 14     | 0.283   | 152     | 17149   |   |        |      |    | non-metastatic cells 1, protein (NM23A) expressed in isoform b [Homo sapiens]         |
|                    | HsHeLa_Control-MG_Ti_20   | 3.8743 | 0.2064 | 1345.49 | 1345.59 | 6946.5  | 6 | 915.1  | 68.2 | 8  | R.TFIAIKPDGVQR.G                                                                      |
|                    | HsF-IP-293_Ti_205.1656.1( | 3.1597 | 0.1115 | 1786.66 | 1787.04 | 7174.9  | 3 | 745.9  | 56.2 | 2  | R.VMLGETNPADSKPGTIR.G                                                                 |
|                    | Hs293FLP_TREX_Ti_103.1    | 3.8718 | 0.3198 | 1486.31 | 1486.58 | 5491.1  | 1 | 1082.2 | 76.9 | 4  | R.NIIHGSDSVESA.EK.E                                                                   |
| gij 73622130 ref N |                           | 6      | 25     | 0.243   | 152     | 16932   |   |        |      |    | Bola-like protein 2 isoform a [Homo sapiens]                                          |
|                    | HsHeLa_Control-MG_Ti_20   | 5.0862 | 0.4298 | 1870.7  | 1870.97 | 8452.4  | 1 | 1790   | 73.3 | 11 | R.DLEAEHVEVEDTTLNR.C                                                                  |
|                    | HsFLAG-MOCK_300mM_T       | 3.9682 | 0.3119 | 2512.48 | 2513.83 | 7248.1  | 1 | 792.9  | 47.5 | 3  | R.HRLVNACLAELPHIHAFEQK.T                                                              |
|                    | HsFLAG-MOCK_300mM_T       | 5.4896 | 0.2457 | 2515.02 | 2513.83 | 5986.6  | 1 | 1714.4 | 46.2 | 2  | R.HRLVNACLAELPHIHAFEQK.T                                                              |
|                    | HsHeLa_Control-MG_Ti_20   | 4.9583 | 0.3283 | 2219.68 | 2220.5  | 11142.3 | 1 | 2076.5 | 61.1 | 4  | R.LVNACLAELPHIHAFEQK.T                                                                |
|                    | Hs293FLP_Ti_305.2389.23(  | 4.8302 | 0.4118 | 2221.65 | 2220.5  | 9190.9  | 1 | 1768.2 | 61.1 | 4  | R.LVNACLAELPHIHAFEQK.T                                                                |
|                    | HsHeLa_Control-MG_Ti_20   | 3.9445 | 0.2823 | 2221.97 | 2220.5  | 4266.4  | 1 | 653.4  | 40.3 | 1  | R.LVNACLAELPHIHAFEQK.T                                                                |
| gij 4506631 ref NF |                           | 3      | 6      | 0.243   | 115     | 12784   |   |        |      |    | ribosomal protein L30 [Homo sapiens]                                                  |
| *                  | Hs293FLP_TREX_Ti_104.1    | 2.432  | 0.2359 | 1353.45 | 1354.6  | 2863.5  | 7 | 114.3  | 54.5 | 1  | K.LVILANNC.PALR.K                                                                     |
| *                  | HsGST-MOCK_Ti_305.222(    | 4.2408 | 0.3329 | 1354.47 | 1354.6  | 8375    | 1 | 1791.4 | 86.4 | 4  | K.LVILANNC.PALR.K                                                                     |
| *                  | HsFLAG-MOCK_300mM_T       | 3.8343 | 0.2431 | 1760.2  | 1758.98 | 6021.9  | 1 | 1246.1 | 73.3 | 1  | R.VCTLAIIDPGDSDIIR.S                                                                  |
| gij 4506597 ref NF |                           | 3      | 8      | 0.242   | 165     | 17819   |   |        |      |    | ribosomal protein L12 [Homo sapiens]                                                  |
| gij 89032011 ref X |                           | 3      | 8      | 0.211   | 190     | 20667   |   |        |      |    | PREDICTED: similar to 60S ribosomal protein L12 [Homo sapiens]                        |
| gij 89031330 ref X |                           | 3      | 8      | 0.211   | 190     | 20667   |   |        |      |    | PREDICTED: similar to 60S ribosomal protein L12 [Homo sapiens]                        |
|                    | Hs293FLP_TREX_Ti_102.1    | 4.1007 | 0.325  | 1419.49 | 1419.54 | 4967.7  | 1 | 1171.6 | 75   | 1  | R.CTGGEVGATSALAPK.I                                                                   |
|                    | Hs293FLP_TREX_Ti_105.1    | 2.9049 | 0.2    | 882.38  | 882.091 | 3455.5  | 4 | 528.4  | 87.5 | 6  | K.IGLPLGLSPK.K                                                                        |
|                    | Hs293FLP_TREX_Ti_102.1    | 4.3368 | 0.4754 | 1676.56 | 1676.79 | 6765.5  | 1 | 1073.1 | 63.3 | 1  | K.EILGTAQSVGCNV.DGR.H                                                                 |
| gij 17505234 ref N |                           | 8      | 15     | 0.241   | 440     | 49324   |   |        |      |    | nucleolar and spindle associated protein 1 isoform 2 [Homo sapiens]                   |
| *                  | HsGST-MOCK_Ti_102.115(    | 3.1361 | 0.2559 | 1853.65 | 1853.99 | 5438.2  | 2 | 595.2  | 56.7 | 2  | K.TVRVDPDSQQNHSEIK.I                                                                  |
| *                  | HsGST-MOCK_Ti_404.171(    | 4.8475 | 0.4363 | 2120.73 | 2121.19 | 5516.1  | 1 | 693.5  | 55.3 | 1  | K.VPSPPEHQAENAVSSGNR.D                                                                |
| *                  | HsGST-MOCK_Ti_103.131(    | 4.0084 | 0.2913 | 1515.49 | 1515.64 | 7673.6  | 1 | 1082   | 77.3 | 3  | K.HFEEHNSMNELK.Q                                                                      |
|                    | HsGST-MOCK_Ti_404.184(    | 2.8785 | 0.2341 | 1159.22 | 1159.33 | 7847.6  | 1 | 822.5  | 70   | 1  | R.LSVASTPISQR.R                                                                       |
|                    | HsGST-MOCK_Ti_406.207(    | 2.6612 | 0.3517 | 1140.64 | 1141.27 | 3263.2  | 1 | 330.3  | 63.6 | 3  | K.SAHVTVSGGTPK.G                                                                      |
|                    | HsFLAG-MOCK_300mM_T       | 4.7189 | 0.4608 | 2033.82 | 2034.28 | 6140.9  | 1 | 1082.8 | 60   | 2  | K.SAHVTVSGGTPKGEAVLGTK.L                                                              |
|                    | HsGST-MOCK_Ti_403.157(    | 3.7156 | 0.3913 | 1389.52 | 1390.53 | 9306.4  | 1 | 1529.7 | 75   | 2  | K.LTTEATQTPVSNK.K                                                                     |
|                    | HsGST-MOCK_Ti_104.138(    | 2.6541 | 0.2335 | 1512.53 | 1512.71 | 3788.1  | 7 | 294.8  | 54.2 | 1  | K.ASLSRPLNYEPHK.G                                                                     |
| gij 89030021 ref X |                           | 5      | 7      | 0.241   | 261     | 28492   |   |        |      |    | PREDICTED: far upstream element (FUSE) binding protein 3 isoform 2 [Homo sapiens]     |
| gij 89030637 ref X |                           | 5      | 7      | 0.241   | 261     | 28492   |   |        |      |    | PREDICTED: similar to Far upstream element binding protein 3 (FUSE binding protein 3) |
|                    | HsFLAG-Control_HeLa_NE    | 3.0604 | 0.1305 | 1407    | 1406.62 | 9386    | 8 | 897.6  | 68.2 | 1  | R.TVITEEFKVPDK.M                                                                      |
|                    | HsHeLa3_Ti_106.2111.211   | 2.8021 | 0.1606 | 1070.66 | 1070.28 | 4007.8  | 6 | 512.7  | 81.2 | 1  | K.RLLGQIVDR.C                                                                         |
|                    | HsHeLa3_Ti_104.2708.270(  | 4.7219 | 0.2862 | 2568.13 | 2568.8  | 7995    | 1 | 1007.3 | 47.8 | 2  | R.NGPGFHNDIDSNSTIQEILIPASK.V                                                          |
|                    | HsHeLa3_Ti_103.1956.195(  | 4.8006 | 0.3346 | 1574.04 | 1573.86 | 6484    | 1 | 1743.8 | 78.6 | 2  | K.MVMIQDGLPTGADK.P                                                                    |
|                    | HsHeLa3_Ti_105.2026.202(  | 3.6505 | 0.3227 | 1941.72 | 1940.33 | 5333.7  | 3 | 404.6  | 47.1 | 1  | K.MVMIQDGLPTGADKPLR.I                                                                 |
| gij 57863301 ref N |                           | 26     | 84     | 0.24    | 1506    | 164886  |   |        |      |    | CLIP-associating protein 2 [Homo sapiens]                                             |
| *                  | Hs283FLP_Ti_102.1639.16(  | 3.3637 | 0.3582 | 2216.72 | 2217.27 | 4590.7  | 1 | 646.3  | 50   | 6  | K.SFDDEESVDGNRPSSAASAFK.V                                                             |
| *                  | Hs293FLP-MG_Ti_202.280(   | 3.8531 | 0.3886 | 1584.63 | 1584.77 | 3729    | 1 | 531.6  | 69.2 | 3  | K.AFTDVPSIQIYSSR.E                                                                    |

|                   |                          |        |        |         |         |         |     |        |      |                                                                                       |
|-------------------|--------------------------|--------|--------|---------|---------|---------|-----|--------|------|---------------------------------------------------------------------------------------|
| *                 | Hs293FLP-MG_Ti_205.338   | 4.8055 | 0.4008 | 2098.68 | 2097.35 | 8760.2  | 1   | 1326.3 | 58.8 | 1 R.SLLVAGAAQYDCFFQHLR.L                                                              |
| *                 | Hs293FLP-MG_Ti_204.235   | 3.8465 | 0.4792 | 1713.58 | 1713.94 | 8190.2  | 1   | 1186.6 | 60   | 1 R.EACITVAHLSTVLGNK.F                                                                |
| *                 | Hs293FLP_TREX_Ti_103.1   | 3.0545 | 0.1274 | 1348.56 | 1347.56 | 3695.9  | 1   | 558.1  | 77.3 | 7 R.LIPLITSNCTSK.S                                                                    |
| *                 | Hs293FLP_Ti_306.3795.37  | 4.0121 | 0.3192 | 2392.93 | 2392.67 | 6767.5  | 1   | 961.8  | 55.6 | 1 R.SFEFLDLLLQEWQTHSLER.H                                                             |
| *                 | Hs283FLP_Ti_105.1410.14  | 2.1317 | 0.154  | 1080.62 | 1081.3  | 5020.1  | 9   | 634.6  | 72.2 | 1 R.HAAVLVETIK.K                                                                      |
| *                 | Hs293FLP_Ti_304.1522.15  | 2.3557 | 0.1045 | 1080.66 | 1081.3  | 4378.1  | 2   | 646    | 72.2 | 2 R.HAAVLVETIK.K                                                                      |
| *                 | HsF-IP-293-MG_Ti_105.150 | 3.0448 | 0.2681 | 1082.06 | 1081.3  | 5523.1  | 1   | 1045   | 83.3 | 2 R.HAAVLVETIK.K                                                                      |
| *                 | Hs283FLP_Ti_104.1412.14  | 2.736  | 0.2374 | 1082.34 | 1081.3  | 5455.9  | 1   | 680.2  | 77.8 | 1 R.HAAVLVETIK.K                                                                      |
| *                 | Hs283FLP_Ti_106.1917.19  | 4.0726 | 0.3753 | 1209.61 | 1209.48 | 5619.1  | 1   | 1395.8 | 90   | 2 R.HAAVLVETIKK.G                                                                     |
| *                 | Hs293FLP-MG_Ti_204.253   | 4.8873 | 0.3514 | 2324.88 | 2325.5  | 5794.8  | 1   | 924.3  | 55.3 | 9 R.NHFPGEAETLYNSLEPSYQK.S                                                            |
| *                 | HsFLAG-Control_293_Ti_20 | 4.2322 | 0.3066 | 1728.81 | 1728.81 | 6848.2  | 1   | 1264.1 | 66.7 | 4 R.SSSSQESLNRPFSSK.W                                                                 |
| *                 | Hs283FLP_Ti_103.1186.11  | 4.9083 | 0.3422 | 1375.46 | 1375.48 | 7089.2  | 1   | 1767.1 | 76.9 | 4 R.SRSDIDVNAAGAK.A                                                                   |
| *                 | HsFLAG-Control_293_Ti_20 | 4.6198 | 0.4402 | 1621.27 | 1620.84 | 8707.9  | 1   | 1185.4 | 63.3 | 3 R.VLTTTALSTVSSGVQR.V                                                                |
| *                 | HsF-IP-293-MG_Ti_102.100 | 2.6974 | 0.2254 | 1017.23 | 1017.17 | 4152.6  | 9   | 529.1  | 72.2 | 1 R.VLVNSASAQK.R                                                                      |
| *                 | Hs283FLP_Ti_104.1711.17  | 3.9444 | 0.4584 | 1681.78 | 1681.85 | 4878.4  | 1   | 1118.5 | 73.3 | 9 R.SFQPLPGPGYGISQSSR.L                                                               |
| *                 | Hs293FLP-MG_Ti_202.349   | 4.695  | 0.4013 | 1731.5  | 1731.9  | 10100   | 1   | 2287.5 | 71.9 | 6 R.VLNTGSDVEEAVADALK.K                                                               |
| *                 | HsF-IP-293-MG_Ti_102.23  | 3.3721 | 0.2674 | 1369.52 | 1369.52 | 10524.3 | 2   | 975.9  | 63.6 | 1 R.GVTEAIQNFSFR.S                                                                    |
| *                 | HsF-IP-293-MG_Ti_102.07  | 3.9161 | 0.3648 | 1551.15 | 1551.56 | 8967.9  | 2   | 1518.5 | 66.7 | 1 R.AGGDATDSSQTALDNK.A                                                                |
| *                 | Hs283FLP_Ti_102.2202.22  | 4.4101 | 0.3869 | 1924.51 | 1925.02 | 6955.4  | 1   | 1919   | 80   | 7 R.DYNPNYNSDSISPFNK.S                                                                |
| *                 | HsF-IP-293-MG_Ti_106.300 | 4.975  | 0.3926 | 1442.69 | 1442.78 | 8171.1  | 1   | 2125.8 | 87.5 | 1 K.TILLLETLGDK.E                                                                     |
| *                 | Hs293FLP-MG_Ti_202.284   | 3.4277 | 0.3576 | 2094.58 | 2092.27 | 7757.7  | 1   | 601.6  | 44.7 | 1 R.SAEEAASVLATISPEQCIK.V                                                             |
| *                 | Hs293FLP-MG_Ti_203.369   | 5.367  | 0.4306 | 2113.77 | 2114.5  | 9568.9  | 1   | 1540.8 | 58.3 | 6 K.VLCPIQTADYPINLAAIK.M                                                              |
| *                 | Hs293FLP-MG_Ti_202.490   | 3.3796 | 0.2963 | 2889.46 | 2890.28 | 5647.7  | 1   | 362.9  | 34   | 1 K.ETLNLLLPEIMPGLIQGYDNSESSVR.K                                                      |
| *                 | Hs283FLP_Ti_102.1031.10  | 3.7221 | 0.4446 | 1793.28 | 1792.81 | 6298.3  | 1   | 850.8  | 55.6 | 3 K.RAQTGGGADPTTDVSGQS.-                                                              |
| gi 89030025 ref X |                          | 8      | 16     | 0.239   | 461     | 49351   | 8.4 | U      |      | PREDICTED: far upstream element (FUSE) binding protein 3 isoform 4 [Homo sapiens]     |
| gi 89030643 ref X |                          | 8      | 16     | 0.227   | 485     | 52239   | 8.6 | U      |      | PREDICTED: similar to Far upstream element binding protein 3 (FUSE binding protein 3) |
| gi 89030641 ref X |                          | 8      | 16     | 0.239   | 461     | 49351   | 8.4 | U      |      | PREDICTED: similar to Far upstream element binding protein 3 (FUSE binding protein 3) |
| gi 89030027 ref X |                          | 8      | 16     | 0.227   | 485     | 52239   | 8.6 | U      |      | PREDICTED: far upstream element (FUSE) binding protein 3 isoform 1 [Homo sapiens]     |
|                   | HsHeLa3_Ti_106.2111.211  | 2.8021 | 0.1606 | 1070.66 | 1070.28 | 4007.8  | 6   | 512.7  | 81.2 | 1 K.RLLGQIVDR.C                                                                       |
|                   | HsHeLa3_Ti_104.2708.270  | 4.7219 | 0.2862 | 2568.13 | 2568.8  | 7995    | 1   | 1007.3 | 47.8 | 2 R.NGPGFHNDIDSNSTIQEILIPASK.V                                                        |
|                   | HsHeLa3_Ti_103.1956.195  | 4.8006 | 0.3346 | 1574.04 | 1573.86 | 6484    | 1   | 1743.8 | 78.6 | 2 K.MVMIQDGLPLTGADK.P                                                                 |
|                   | HsHeLa3_Ti_105.2026.202  | 3.6505 | 0.3227 | 1941.72 | 1940.33 | 5333.7  | 3   | 404.6  | 47.1 | 1 K.MVMIQDGLPLTGADKPLR.I                                                              |
|                   | HsFLAG-Control_HeLa_NE   | 3.4986 | 0.1241 | 1502.4  | 1502.67 | 3938.4  | 1   | 600.6  | 70.8 | 3 R.IQFKPDDGISPER.A                                                                   |
|                   | HsHeLa3_Ti_103.1320.132  | 1.813  | 0.1061 | 1041.59 | 1042.2  | 5358.7  | 4   | 324.4  | 66.7 | 1 R.AAQVMGPPDR.C                                                                      |
|                   | HsFLAG-Control_HeLa_NE   | 4.2249 | 0.3994 | 2248.39 | 2248.45 | 4431.8  | 1   | 434.6  | 45.2 | 3 R.GDWSVGAPGGVQEITYTVPADK.C                                                          |
|                   | HsHeLa3_Ti_105.1402.140  | 3.9641 | 0.3608 | 1567.83 | 1567.7  | 7297.9  | 1   | 1372.2 | 73.1 | 3 K.SINQQSGAHVELQR.N                                                                  |
| gi 4758138 ref NF |                          | 13     | 61     | 0.238   | 614     | 69148   | 8.9 | U      |      | DEAD (Asp-Glu-Ala-Asp) box polypeptide 5 [Homo sapiens]                               |
| *                 | HsGST-MOCK_Ti_404.187    | 3.7038 | 0.281  | 1390.88 | 1390.5  | 8154.9  | 1   | 1293   | 80   | 2 K.NFYQEHPLAR.R                                                                      |
| *                 | HsGST-MOCK_Ti_103.109    | 2.8076 | 0.2294 | 1409.14 | 1409.55 | 5413    | 1   | 387.2  | 65   | 1 R.RTAQEVEYTRR.S                                                                     |
| *                 | HsGST-MOCK_Ti_303.265    | 3.6573 | 0.1954 | 1369.44 | 1369.57 | 7837.3  | 7   | 895.4  | 58.3 | 6 R.GDGPICLVLPATR.E                                                                   |
| *                 | HsGST-MOCK_Ti_402.256    | 3.2433 | 0.2552 | 1794.64 | 1793.94 | 11468   | 1   | 1151.8 | 60.7 | 1 R.ELAQQVQQVAAEYCR.A                                                                 |
| *                 | HsFLAG-Control_HeLa_NE   | 1.8359 | 0.1012 | 1053.37 | 1054.15 | 7559.8  | 5   | 566    | 66.7 | 1 K.STCIYGGAPK.G                                                                      |
| *                 | HsFLAG-Control_HeLa_NE   | 3.8767 | 0.2427 | 1298.37 | 1296.42 | 6212.9  | 1   | 1375.4 | 85   | 4 R.TTYLVLDEADR.M                                                                     |
| *                 | HsGST-MOCK_Ti_303.267    | 3.1278 | 0.2572 | 1337.33 | 1337.6  | 5377.8  | 1   | 865.1  | 80   | 2 R.MLDMGFEPQIR.K                                                                     |
| *                 | HsFlag1P_Ti_103.2635.263 | 3.5657 | 0.2915 | 1679.68 | 1679.83 | 6958.8  | 1   | 827.3  | 62.5 | 2 K.SQQRDWVLNEFK.H                                                                    |
| *                 | HsFlag1P_Ti_104.2210.221 | 4.2007 | 0.3247 | 1227.42 | 1227.45 | 6635    | 1   | 1668.4 | 86.4 | 19 K.APILIATDVASR.G                                                                   |
| *                 | HsFlag1P_Ti_104.2894.289 | 4.5794 | 0.3974 | 2082.79 | 2083.39 | 6206.5  | 1   | 939.4  | 55.3 | 4 K.APILIATDVASRGLDVEDVK.F                                                            |
| *                 | HsFLAG-Control_HeLa_NE   | 2.6493 | 0.2241 | 874.56  | 874.966 | 7540.7  | 5   | 774.8  | 78.6 | 1 R.GLDVEDVK.F                                                                        |
| *                 | HsFLAG-Control_HeLa_NE   | 3.7113 | 0.3515 | 2133.3  | 2133.28 | 5119.2  | 1   | 623.2  | 59.4 | 5 K.FVINYDYPNSEDYIHR.I                                                                |

|                   |                          |        |        |         |         |        |       |        |      |     |                                                                     |
|-------------------|--------------------------|--------|--------|---------|---------|--------|-------|--------|------|-----|---------------------------------------------------------------------|
| *                 | HsFLAG-Control_MG_293_   | 3.7611 | 0.3594 | 1576.34 | 1575.76 | 9078.9 | 1     | 1016.6 | 61.5 | 13  | K.TGTAYTFFTPNNIK.Q                                                  |
| gi 67782356 ref N |                          | 4      | 6      | 0.238   | 529     | 51580  | 8.4 U |        |      |     | corneodesmosin precursor [Homo sapiens]                             |
| *                 | HsFLAG-Control_Hela_Ti_1 | 3.1467 | 0.2878 | 2506.6  | 2504.73 | 5728.2 | 1     | 394.6  | 37   | 1   | K.SYGGYEVVGGSSDSYLVPGMTYSK.G                                        |
| *                 | HsFLAG-Control_Hela_Ti_1 | 3.6619 | 0.2625 | 1657.45 | 1655.85 | 4686.8 | 1     | 596.9  | 55.9 | 3   | K.GSPGVPSFAAGPPISEK.Y<br>K.YFSSNPIIPSQSAASSAIAFQPVGTGGVQLCGGGSTG    |
| *                 | HsFLAG-Control_293_Ti_1( | 4.1364 | 0.2664 | 3790.93 | 3788.13 | 5131.7 | 1     | 643.4  | 23.7 | 1   | SK.G<br>R.VPSSSSISSSSGLPYHPCGSASQSPCSPPGTGSFSS                      |
| *                 | HsFLAG-Control_Hela_Ti_1 | 3.9333 | 0.1468 | 4365.72 | 4365.47 | 7908.1 | 1     | 566.5  | 17   | 1   | SSSSQSSGK.I                                                         |
| gi 74099697 ref N |                          | 11     | 166    | 0.238   | 449     | 49264  | 6.3 U |        |      |     | heterogeneous nuclear ribonucleoprotein H2 [Homo sapiens]           |
| gi 9624998 ref NF |                          | 11     | 166    | 0.238   | 449     | 49264  | 6.3 U |        |      |     | heterogeneous nuclear ribonucleoprotein H2 [Homo sapiens]           |
|                   | Hs293FLP-MG_Ti_204.147:  | 3.8795 | 0.4268 | 1685.48 | 1685.75 | 7488.8 | 1     | 1436.6 | 70   | 10  | K.HTGNPSPDTANDGFVR.L                                                |
|                   | HsFLAG-Control_293_Ti_2( | 4.52   | 0.5046 | 1685.48 | 1685.75 | 8106.6 | 1     | 2099.2 | 80   | 8   | K.HTGNPSPDTANDGFVR.L                                                |
|                   | HsFLAG-Control_HeLa_NE   | 4.3166 | 0.4328 | 1686.3  | 1685.75 | 6792.2 | 1     | 914.4  | 63.3 | 5   | K.HTGNPSPDTANDGFVR.L                                                |
|                   | HsFLAG-Control_293_Ti_2( | 4.3669 | 0.2323 | 1686.72 | 1685.75 | 7063.6 | 3     | 1191.3 | 45   | 1   | K.HTGNPSPDTANDGFVR.L                                                |
|                   | HsFLAG-MOCK_300mM_T      | 4.0472 | 0.1915 | 1686.88 | 1685.75 | 5906.1 | 2     | 1316.5 | 48.3 | 1   | K.HTGNPSPDTANDGFVR.L                                                |
|                   | HsHeLa3_Ti_106.3375.337: | 4.2045 | 0.2237 | 3773.82 | 3771.29 | 4292.3 | 1     | 378.9  | 23.5 | 1   | R.GLPGFCSKEEIVQFFSGLEIVPNGMTLPVDFQGR.S                              |
|                   | HsFlag1P_Ti_102.3107.310 | 5.4581 | 0.4545 | 1841.95 | 1843    | 8129.4 | 1     | 2087.4 | 71.9 | 105 | R.STGEAFVQFASQEIIEK.A                                               |
|                   | HsFLAG-Control_293_Ti_2( | 3.8505 | 0.4656 | 1604.09 | 1602.68 | 9274.9 | 1     | 1651.1 | 79.2 | 9   | R.DLNYCFSGMSDHR.Y                                                   |
|                   | HsFLAG-Control_293_Ti_2( | 4.4199 | 0.4232 | 2029.52 | 2030.26 | 9407.7 | 1     | 1311.1 | 59.4 | 8   | R.ATENDIYNFFSPLNPMR.V                                               |
|                   | HsFLAG-Control_HeLa_NE   | 2.6268 | 0.1908 | 1092.55 | 1093.23 | 6937.7 | 1     | 767.6  | 72.2 | 2   | R.VHIEIGPDGR.V                                                      |
|                   | HsFLAG-Control_HeLa_NE   | 3.4554 | 0.2844 | 1093.46 | 1093.23 | 5275.7 | 1     | 1166.4 | 83.3 | 16  | R.VHIEIGPDGR.V                                                      |
| gi 17737321 ref N |                          | 12     | 36     | 0.235   | 720     | 82615  | 5.9 U |        |      |     | engulfment and cell motility 2 [Homo sapiens]                       |
| gi 33469947 ref N |                          | 12     | 36     | 0.235   | 720     | 82615  | 5.9 U |        |      |     | engulfment and cell motility 2 [Homo sapiens]                       |
| gi 19718769 ref N |                          | 12     | 36     | 0.235   | 720     | 82615  | 5.9 U |        |      |     | engulfment and cell motility 2 [Homo sapiens]                       |
|                   | HsFLAG-Control_293_Ti_2( | 4.6564 | 0.4107 | 1996.11 | 1996.27 | 4248.8 | 1     | 844.2  | 64.7 | 3   | K.VAIEWPGANAQLLEIDQK.R                                              |
|                   | HsFLAG-Control_293_Ti_2( | 3.3463 | 0.2404 | 2099.78 | 2100.26 | 5248.5 | 1     | 537.6  | 53.1 | 2   | K.EVCDGWSLPNPEYYTLR.Y                                               |
|                   | HsFLAG-Control_293_Ti_2( | 3.9732 | 0.3434 | 1655.22 | 1655.81 | 7064.8 | 1     | 1484.4 | 73.1 | 2   | R.YADGPQLYITEQTR.S                                                  |
|                   | HsFLAG-Control_293_Ti_2( | 4.0673 | 0.3892 | 1370.36 | 1370.59 | 7454.5 | 1     | 1540.9 | 79.2 | 6   | K.NGTILQLAISPSR.A                                                   |
|                   | HsFLAG-Control_293_Ti_2( | 5.2671 | 0.3974 | 2024.54 | 2025.37 | 9121.2 | 1     | 1792.4 | 64.7 | 1   | R.SLAILESMVLNSQSLYQK.I                                              |
|                   | Hs293FLP_Ti_303.1442.14  | 4.6124 | 0.3908 | 2049.94 | 2050.15 | 3970.8 | 1     | 796.1  | 60.5 | 1   | R.RIAFDAESDPSNAPGSGTEK.R                                            |
|                   | HsFLAG-Control_293_Ti_2( | 4.7143 | 0.3186 | 1893.36 | 1893.96 | 6090.4 | 1     | 1065.2 | 61.1 | 2   | R.IAFDAESDPSNAPGSGTEK.R                                             |
|                   | HsFLAG-Control_293_Ti_2( | 3.0894 | 0.129  | 1860.68 | 1859.11 | 8246.6 | 1     | 944    | 53.3 | 1   | K.MLCEILQVGELPNEGR.N                                                |
|                   | HsFLAG-Control_293_Ti_2( | 6.0226 | 0.5077 | 2633.92 | 2634.82 | 7703.8 | 1     | 1722.7 | 56.8 | 2   | K.VLHYGDLDDNPQGEVTFESLQEK.I                                         |
|                   | HsFLAG-Control_293_Ti_2( | 4.8548 | 0.332  | 1997.71 | 1998.37 | 5474.9 | 1     | 799.2  | 58.8 | 10  | R.LLDLENIQIPEAPPIPK.E                                               |
|                   | HsFLAG-Control_293_Ti_2( | 4.5241 | 0.27   | 1997.83 | 1998.37 | 6101.9 | 1     | 1791.6 | 52.9 | 4   | R.LLDLENIQIPEAPPIPK.E                                               |
|                   | HsFLAG-Control_MG_293_   | 2.8241 | 0.3272 | 1463.99 | 1464.53 | 8045.4 | 1     | 696.1  | 63.6 | 2   | K.EPSSYDFVYHYG.-                                                    |
| gi 55956919 ref N |                          | 7      | 15     | 0.235   | 332     | 35968  | 6.9 U |        |      |     | heterogeneous nuclear ribonucleoprotein AB isoform a [Homo sapiens] |
| gi 55956921 ref N |                          | 7      | 15     | 0.274   | 285     | 30588  | 7.9 U |        |      |     | heterogeneous nuclear ribonucleoprotein AB isoform b [Homo sapiens] |
|                   | HsHeLa3_Ti_103.2460.246  | 2.0828 | 0.1111 | 1328.69 | 1328.53 | 6373.3 | 5     | 374.6  | 50   | 1   | K.MFVGGLSWDTSK.K                                                    |
|                   | HsHeLa3_Ti_105.2160.216  | 3.1668 | 0.2693 | 1456.79 | 1456.7  | 6051.3 | 2     | 669.9  | 62.5 | 2   | K.MFVGGLSWDTSK.D                                                    |
|                   | HsHeLa3_Ti_105.3190.319  | 3.2596 | 0.1074 | 929.39  | 929.15  | 2854.9 | 7     | 591.2  | 85.7 | 2   | R.GFGFILFK.D                                                        |
|                   | Hs293FLP_TREX_Ti_104.1   | 5.1443 | 0.3386 | 1632.4  | 1632.85 | 5726.1 | 1     | 1636.8 | 82.1 | 6   | K.KIFVGGLNPEATEEK.I                                                 |
|                   | HsHeLa3_Ti_105.3664.366  | 3.0226 | 0.3039 | 2215.85 | 2215.48 | 8491.9 | 1     | 1030.4 | 52.8 | 1   | R.EYFGEFGEIEAIELPMDPK.L                                             |
|                   | HsHeLa3_Ti_105.2607.260  | 3.4495 | 0.3999 | 1671.65 | 1670.95 | 5015.5 | 1     | 820.5  | 65.4 | 2   | R.GFVFITFKEEPPVK.K                                                  |
|                   | HsHeLa_Control-MG_Ti_20  | 2.108  | 0.2595 | 990.24  | 991.135 | 3482.2 | 7     | 185.8  | 56.2 | 1   | K.KFHTVSGSK.C                                                       |
| gi 32483377 ref N |                          | 3      | 15     | 0.235   | 238     | 25839  | 7.5 U |        |      |     | peroxiredoxin 3 isoform b [Homo sapiens]                            |
| gi 5802974 ref NF |                          | 3      | 15     | 0.219   | 256     | 27693  | 7.8 U |        |      |     | peroxiredoxin 3 isoform a precursor [Homo sapiens]                  |
|                   | HsHeLa_Control-MG_Ti_20  | 5.1113 | 0.4153 | 1463    | 1463.67 | 9684.9 | 1     | 2754.7 | 84.6 | 5   | R.DYGVLLLEGSLALR.G                                                  |
|                   | Hs293FLP_TREX_Ti_105.1   | 2.7992 | 0.3249 | 1207.62 | 1207.38 | 5786.7 | 1     | 771.8  | 75   | 1   | K.HLSVNDLPVGR.S                                                     |

|                   |                         |        |        |         |         |         |      |        |      |    |                                                                             |
|-------------------|-------------------------|--------|--------|---------|---------|---------|------|--------|------|----|-----------------------------------------------------------------------------|
|                   | HsHeLa_Control-MG_Ti_20 | 6.2645 | 0.4601 | 3387.88 | 3387.7  | 7427.2  | 1    | 1234.9 | 31.7 | 9  | K.AFQYVETHGEVCPANWTPDSPTIKPSPAASK.E                                         |
| gi 15431301 ref N |                         | 6      | 11     | 0.234   | 248     | 29226   | 10.7 | U      |      |    | ribosomal protein L7 [Homo sapiens]                                         |
|                   | Hs293FLP_TREX_Ti_106.2  | 3.081  | 0.1865 | 1339.57 | 1339.62 | 4981.4  | 1    | 867.6  | 77.3 | 1  | K.KKEVPAVPETLK.K                                                            |
|                   | Hs293FLP_TREX_Ti_106.2  | 3.3372 | 0.2014 | 1467.6  | 1467.79 | 5733.4  | 1    | 975.6  | 75   | 1  | K.KKEVPAVPETLKK.K                                                           |
|                   | HsFLAG-MOCK_300mM_T     | 2.9547 | 0.3319 | 1664.07 | 1663.96 | 7391.5  | 1    | 974.3  | 61.5 | 2  | R.IVEPYIAWGYPNLK.S                                                          |
|                   | Hs293FLP_TREX_Ti_105.1  | 4.7849 | 0.2846 | 1327.36 | 1327.57 | 4721.8  | 1    | 1179.2 | 86.4 | 3  | K.RIALTDNALIAR.S                                                            |
|                   | Hs293FLP_TREX_Ti_102.1  | 3.7636 | 0.3057 | 1171.39 | 1171.38 | 7116.9  | 1    | 1710.7 | 95   | 2  | R.IALTDNALIAR.S                                                             |
|                   | Hs293FLP_TREX_Ti_103.1  | 4.5061 | 0.3759 | 2116.68 | 2117.2  | 6455    | 1    | 721.4  | 52.8 | 2  | K.TTHFVEGGDAGNREDQINR.L                                                     |
| gi 15809016 ref N |                         | 3      | 4      | 0.233   | 172     | 19779   | 4.8  | U      |      |    | myosin regulatory light chain MRCL2 [Homo sapiens]                          |
| gi 5453740 ref NF |                         | 3      | 4      | 0.234   | 171     | 19794   | 4.8  | U      |      |    | myosin regulatory light chain MRCL3 [Homo sapiens]                          |
|                   | HsFLAG-MOCK_150mM_T     | 5.6344 | 0.4814 | 2091.58 | 2092.33 | 7032    | 1    | 1812.2 | 70.6 | 2  | R.ATSNVFAMFDQSQIQEFK.E                                                      |
|                   | HsFLAG-Control_HeLa_S1( | 3.6942 | 0.3291 | 1416.01 | 1416.48 | 7286.6  | 1    | 1258.2 | 80   | 1  | R.FTDEEVDELYR.E                                                             |
|                   | HsFLAG-MOCK_300mM_T     | 2.9454 | 0.1169 | 1390.92 | 1389.55 | 4933.8  | 1    | 656.1  | 70   | 1  | K.KGNFNIEFTR.I                                                              |
| gi 5453607 ref NF |                         | 14     | 55     | 0.232   | 543     | 59367   | 7.6  | U      |      |    | chaperonin containing TCP1, subunit 7 isoform a [Homo sapiens]              |
| *                 | Hs293FLP_TREX_Ti_104.1  | 2.1627 | 0.3025 | 1062.42 | 1063.29 | 4643.3  | 4    | 401.7  | 61.1 | 2  | K.LLDVVHPPAAK.T                                                             |
| *                 | HsFLAG-Control_HeLa_S1( | 3.2897 | 0.3411 | 1062.99 | 1063.29 | 5731    | 1    | 1197   | 88.9 | 2  | K.LLDVVHPPAAK.T                                                             |
| *                 | HsFLAG-Control_HeLa_S1( | 2.4445 | 0.2399 | 1063.66 | 1063.29 | 5152.3  | 1    | 565.7  | 72.2 | 3  | K.LLDVVHPPAAK.T                                                             |
| *                 | HsFLAG-Control_HeLa_NE  | 5.8877 | 0.5    | 2253.79 | 2253.47 | 6849.8  | 1    | 1661.4 | 64.3 | 21 | K.SQDAEVGDGTTSVTLAAEFLK.Q                                                   |
| *                 | HsFLAG-Control_HeLa_NE  | 6.2374 | 0.5478 | 2253.9  | 2253.47 | 7964.8  | 1    | 2018.5 | 64.3 | 12 | K.SQDAEVGDGTTSVTLAAEFLK.Q                                                   |
| *                 | HsFLAG-Control_HeLa_NE  | 3.5257 | 0.2201 | 2253.96 | 2253.47 | 10151.9 | 1    | 907.4  | 29.8 | 1  | K.SQDAEVGDGTTSVTLAAEFLK.Q                                                   |
| *                 | HsFLAG-Control_HeLa_S1( | 3.0882 | 0.1979 | 945.87  | 946.092 | 6292.2  | 2    | 824.9  | 87.5 | 2  | R.TATQLAVNK.I                                                               |
| *                 | HsFLAG-Control_HeLa_S1( | 3.1658 | 0.421  | 1918.35 | 1918.2  | 12963.3 | 1    | 782.1  | 41.7 | 2  | K.KVQGGALEDSQLVAGVAFK.K                                                     |
| *                 | HsFLAG-Control_HeLa_S1( | 2.9903 | 0.3313 | 1789.41 | 1790.03 | 9923.9  | 1    | 720.5  | 47.1 | 1  | K.VQGGALEDSQLVAGVAFK.K                                                      |
|                   | HsFLAG-Control_HeLa_S1( | 3.8345 | 0.3942 | 2523.12 | 2522.77 | 12160.7 | 1    | 1084.7 | 45   | 1  | R.VHTVEDYQAIVDAEWNILYDK.L                                                   |
|                   | HsFLAG-Control_HeLa_NE  | 4.2323 | 0.3818 | 1566.47 | 1566.75 | 9210.4  | 1    | 1263.4 | 69.2 | 5  | K.LPIGDVATQYFADR.D                                                          |
|                   | HsFLAG-Control_HeLa_S1( | 2.4063 | 0.2126 | 1133.48 | 1134.24 | 8349.9  | 4    | 447.5  | 62.5 | 1  | R.YNFFTGCPC.A                                                               |
|                   | HsFLAG-Control_HeLa_S1( | 4.2122 | 0.4261 | 2290.76 | 2290.58 | 8474.7  | 1    | 1046.3 | 47.6 | 1  | R.INALTAASEAACLIVSVDETIK.N                                                  |
|                   | HsFLAG-Control_HeLa_NE  | 5.2274 | 0.4093 | 2290.91 | 2290.58 | 6375.7  | 1    | 1024.6 | 35.7 | 1  | R.INALTAASEAACLIVSVDETIK.N                                                  |
| gi 54792069 ref N |                         | 2      | 3      | 0.232   | 95      | 10871   | 5.5  | U      |      |    | small ubiquitin-like modifier 2 isoform a precursor [Homo sapiens]          |
| gi 89060987 ref X |                         | 2      | 3      | 0.138   | 160     | 17755   | 6.3  | U      |      |    | PREDICTED: similar to SMT3 suppressor of mif two 3 homolog 2 [Homo sapiens] |
| gi 89060008 ref X |                         | 2      | 3      | 0.138   | 160     | 17755   | 6.3  | U      |      |    | PREDICTED: similar to SMT3 suppressor of mif two 3 homolog 2 [Homo sapiens] |
| gi 54792071 ref N |                         | 2      | 3      | 0.31    | 71      | 8111    | 5.4  | U      |      |    | small ubiquitin-like modifier 2 isoform b precursor [Homo sapiens]          |
|                   | Hs293FLP_TREX_Ti_103.1  | 3.0964 | 0.0832 | 1198.18 | 1198.28 | 9247    | 2    | 1227.8 | 77.8 | 1  | K.TENNDHINLK.V                                                              |
|                   | HsHeLa3_Ti_103.1579.157 | 3.0052 | 0.2906 | 1234.7  | 1235.38 | 5822.7  | 2    | 416.3  | 54.5 | 2  | K.VAGQDGSVVQFK.I                                                            |
| gi 31881687 ref N |                         | 6      | 10     | 0.231   | 363     | 39682   | 8    | U      |      |    | replication factor C 4 [Homo sapiens]                                       |
| gi 4506491 ref NF |                         | 6      | 10     | 0.231   | 363     | 39682   | 8    | U      |      |    | replication factor C 4 [Homo sapiens]                                       |
|                   | HsFLAG-Control_HeLa_NE  | 2.5761 | 0.1017 | 1230.5  | 1230.45 | 5888.1  | 3    | 577.3  | 59.1 | 1  | K.GTSISTKPPLTK.D                                                            |
|                   | HsGST-MOCK_Ti_404.374   | 4.3194 | 0.4574 | 2046.79 | 2047.32 | 6487.7  | 1    | 1049.8 | 55.3 | 4  | K.SLEGADLPNLLFYGPPGTGK.T                                                    |
|                   | HsFLAG-Control_HeLa_NE  | 2.7369 | 0.1891 | 1208.54 | 1208.4  | 6232.2  | 3    | 770.1  | 75   | 1  | K.ISDEGIAYLVK.V                                                             |
|                   | HsFLAG-Control_HeLa_NE  | 3.0865 | 0.2534 | 1325.49 | 1326.58 | 7195.5  | 3    | 701.4  | 62.5 | 1  | K.VITDIAGVIPA.EI                                                            |
|                   | HsFLAG-Control_HeLa_NE  | 3.2128 | 0.2142 | 1326.41 | 1326.58 | 8702    | 1    | 1507.6 | 75   | 1  | K.VITDIAGVIPA.EI                                                            |
|                   | HsFLAG-Control_HeLa_NE  | 6.3491 | 0.5007 | 3087.6  | 3088.36 | 11791.9 | 1    | 2022.6 | 33.3 | 2  | K.DLIDEGHAATQLVNQLHDVVVNNLSDK.Q                                             |
| gi 46276893 ref N |                         | 4      | 6      | 0.23    | 161     | 17911   | 6.1  | U      |      |    | elongin B isoform b [Homo sapiens]                                          |
| gi 6005890 ref NF |                         | 4      | 6      | 0.314   | 118     | 13133   | 4.9  | U      |      |    | elongin B isoform a [Homo sapiens]                                          |
|                   | Hs293FLP-MG_Ti_303.146  | 2.3441 | 0.2731 | 1422.34 | 1423.56 | 5400.4  | 1    | 542.7  | 63.6 | 1  | R.LYKDDQLLDDGK.T                                                            |
|                   | Hs293FLP-MG_Ti_303.131  | 3.5759 | 0.2897 | 1424.4  | 1423.56 | 5993.4  | 1    | 1045.1 | 77.3 | 3  | R.LYKDDQLLDDGK.T                                                            |
|                   | HsHeLa_Control-MG_Ti_20 | 4.6238 | 0.4249 | 2638.23 | 2637.92 | 9104.2  | 1    | 1193.7 | 33.3 | 1  | K.TLGECEGFTSQTARQPAPATVGLAFR.A                                              |
|                   | Hs293FLP-MG_Ti_306.241  | 2.6104 | 0.3461 | 1227.49 | 1228.44 | 3961.6  | 1    | 309.9  | 68.2 | 1  | R.PQAPATVGLAFR.A                                                            |
| gi 5453549 ref NF |                         | 5      | 9      | 0.229   | 271     | 30540   | 6.3  | U      |      |    | thioredoxin peroxidase [Homo sapiens]                                       |

|                    |                          |        |        |         |         |        |   |        |      |    |                                                                                |
|--------------------|--------------------------|--------|--------|---------|---------|--------|---|--------|------|----|--------------------------------------------------------------------------------|
| *                  | Hs293FLP_TREX_Ti_105.1   | 4.0519 | 0.2751 | 1293.41 | 1293.47 | 8555.5 | 1 | 1760   | 81.8 | 2  | R.VSVADHSLHLSK.A                                                               |
| *                  | HsHeLa_Control-MG_Ti_10  | 3.3573 | 0.3636 | 1465.64 | 1465.73 | 5755.1 | 1 | 969.6  | 75   | 2  | R.IPLLSDLTHQISK.D                                                              |
| *                  | Hs293FLP-MG_Ti_306.240   | 3.9691 | 0.3927 | 1625.26 | 1625.74 | 5697.7 | 1 | 1330.6 | 80.8 | 1  | K.DYGVYLEDGHTLR.G                                                              |
|                    | HsHeLa_Control-MG_Ti_20  | 2.8933 | 0.2991 | 1140.68 | 1141.24 | 7169.4 | 1 | 913.8  | 77.8 | 3  | K.HGEVCPAGWK.P                                                                 |
| *                  | HsHeLa_Control-MG_Ti_10  | 4.3364 | 0.3338 | 2405.82 | 2404.65 | 5461.5 | 1 | 970.4  | 35.2 | 1  | K.HGEVCPAGWKPGSETIIPDPAGK.L                                                    |
| gi 4502549 ref NF  |                          | 2      | 24     | 0.228   | 149     | 16838  |   |        |      |    | calmodulin 2 [Homo sapiens]                                                    |
| gi 5901912 ref NF  |                          | 2      | 24     | 0.228   | 149     | 16838  |   |        |      |    | calmodulin 1 (phosphorylase kinase, delta) [Homo sapiens]                      |
| gi 58218968 ref NF |                          | 2      | 24     | 0.228   | 149     | 16838  |   |        |      |    | calmodulin 3 [Homo sapiens]                                                    |
|                    | HsHeLa3_Ti_102.1822.182  | 3.7027 | 0.3618 | 1266.66 | 1266.35 | 5762.1 | 1 | 1244.6 | 81.8 | 3  | K.DGNGYISAAELR.H                                                               |
|                    | HsHeLa3_Ti_102.3777.377  | 4.9963 | 0.381  | 2490.93 | 2491.7  | 5450.3 | 1 | 1011.9 | 54.8 | 21 | R.EADIDGDGQVNYEEFVQMMTAK.-                                                     |
| gi 16751921 ref NF |                          | 5      | 16     | 0.227   | 110     | 11284  |   |        |      |    | dermcidin precursor [Homo sapiens]                                             |
| *                  | HsFLAG-Control_Hela_Ti_1 | 2.704  | 0.1698 | 1129.22 | 1129.17 | 4873.2 | 7 | 527.7  | 65   | 2  | K.ENAGEDPGLAR.Q                                                                |
| *                  | HsFLAG-Control_293_Ti_20 | 4.7558 | 0.3776 | 1460.17 | 1460.62 | 8454   | 1 | 2051.3 | 76.9 | 6  | K.LGKDAVEDLESVGK.G                                                             |
| *                  | HsFLAG-Control_Hela_Ti_1 | 4.2213 | 0.2867 | 1162.17 | 1162.24 | 5317.6 | 1 | 1153.4 | 85   | 4  | K.DAVEDLESVGK.G                                                                |
| *                  | HsFLAG-Control_293_Ti_10 | 4.2005 | 0.3018 | 1162.29 | 1162.24 | 5093   | 1 | 1120.1 | 85   | 2  | K.DAVEDLESVGK.G                                                                |
| *                  | HsFLAG-Control_293_Ti_10 | 2.424  | 0.2668 | 1163.46 | 1162.24 | 7467.7 | 9 | 556.5  | 65   | 2  | K.DAVEDLESVGK.G                                                                |
| gi 25777711 ref NF |                          | 2      | 10     | 0.225   | 160     | 18063  |   |        |      |    | S-phase kinase-associated protein 1A isoform a [Homo sapiens]                  |
| gi 25777713 ref NF |                          | 2      | 10     | 0.221   | 163     | 18658  |   |        |      |    | S-phase kinase-associated protein 1A isoform b [Homo sapiens]                  |
|                    | HsFLAG-Control_HeLa_NE   | 3.8507 | 0.3433 | 1881.56 | 1880.06 | 7751.6 | 1 | 1135.3 | 59.4 | 2  | K.LQSSDGEIFEVDVEIAK.Q                                                          |
|                    | HsFLAG-Control_HeLa_NE   | 5.4233 | 0.4006 | 2136.9  | 2137.48 | 9430.1 | 1 | 1577.3 | 58.3 | 8  | K.VDQGTFLFELILAAANYLDIK.G                                                      |
| gi 4503483 ref NF  |                          | 15     | 54     | 0.224   | 858     | 95338  |   |        |      |    | eukaryotic translation elongation factor 2 [Homo sapiens]                      |
| *                  | HsGST-MOCK_Ti_405.4670   | 4.2605 | 0.3695 | 2205.35 | 2205.47 | 9483   | 1 | 914.2  | 50   | 8  | K.STAISLFYELSENDLNFIK.Q                                                        |
| *                  | HsHeLa3_Ti_103.3882.388  | 5.0109 | 0.2786 | 2220.93 | 2221.52 | 3976.5 | 1 | 819.1  | 64.7 | 13 | R.ALLELQLEPEELYQTFQR.I                                                         |
| *                  | Hs293FLP_TREX_Ti_102.1   | 2.8102 | 0.2061 | 1015.41 | 1014.08 | 4107.1 | 1 | 524.2  | 72.2 | 1  | K.GEGQLGPAER.A                                                                 |
| *                  | HsHeLa3_Ti_103.3627.362  | 4.0571 | 0.2568 | 1496.62 | 1495.77 | 7673   | 1 | 1415   | 77.3 | 6  | R.TFCQLILDPIFK.V                                                               |
| *                  | Hs293FLP_TREX_Ti_103.1   | 2.198  | 0.1674 | 1107.44 | 1108.32 | 6209.8 | 7 | 458.4  | 55   | 1  | R.VFSGLVSTGLK.V                                                                |
| *                  | HsFLAG-Control_MG_293_   | 2.027  | 0.1218 | 1107.52 | 1108.32 | 9045.3 | 2 | 671.7  | 60   | 1  | R.VFSGLVSTGLK.V                                                                |
| *                  | Hs293FLP_TREX_Ti_103.1   | 3.242  | 0.1665 | 1109.5  | 1108.32 | 4334   | 1 | 890    | 80   | 2  | R.VFSGLVSTGLK.V                                                                |
| *                  | Hs293FLP-MG_Ti_202.452   | 3.4937 | 0.383  | 2761.39 | 2761.15 | 4847.9 | 1 | 472.4  | 39.6 | 1  | R.YVEPIEDVPCGNIVGLVGVDDQFLVK.T                                                 |
| *                  | Hs293FLP_TREX_Ti_102.1   | 3.985  | 0.4356 | 1595.33 | 1595.71 | 8920.2 | 1 | 1231.7 | 65.4 | 1  | R.ETVSEESNVLCLSK.S                                                             |
| *                  | HsGST-MOCK_Ti_102.180    | 3.8897 | 0.239  | 2143.98 | 2144.35 | 8645.9 | 2 | 1014.6 | 39.5 | 1  | K.ARPFPDGLAEDIDKGEVSAR.Q                                                       |
| *                  | HsHeLa3_Ti_106.2740.274  | 3.325  | 0.3199 | 2234.09 | 2234.52 | 6149.4 | 1 | 847.8  | 52.6 | 2  | R.KIWCFCGPDGTGPNILTDITK.G                                                      |
| *                  | HsHeLa3_Ti_103.3610.361  | 4.6385 | 0.5003 | 2107.51 | 2106.35 | 6983.4 | 1 | 1352.1 | 63.9 | 7  | K.IWCFCGPDGTGPNILTDITK.G                                                       |
| *                  | Hs293FLP_TREX_Ti_103.1   | 4.2034 | 0.4089 | 1379.36 | 1379.57 | 8563.3 | 1 | 1910.4 | 81.8 | 2  | R.CLYASVLTAPR.L                                                                |
| *                  | HsHeLa_Control-MG_Ti_10  | 5.0364 | 0.4594 | 1964.9  | 1963.26 | 8337.2 | 1 | 1975.6 | 67.6 | 1  | R.GHVFEESQVAGTPMFVVK.A                                                         |
| *                  | HsHeLa_Control-MG_Ti_20  | 3.5653 | 0.2566 | 1446.57 | 1445.66 | 6122.7 | 1 | 852.6  | 70.8 | 7  | K.EGIPALDNFLDKL.-                                                              |
| gi 16933546 ref NF |                          | 6      | 19     | 0.224   | 317     | 34274  |   |        |      |    | ribosomal protein P0 [Homo sapiens]                                            |
| gi 4506667 ref NF  |                          | 6      | 19     | 0.224   | 317     | 34274  |   |        |      |    | ribosomal protein P0 [Homo sapiens]                                            |
|                    | Hs293FLP_TREX_Ti_102.2   | 3.7192 | 0.2608 | 1217.02 | 1218.44 | 7235.8 | 1 | 1472.1 | 88.9 | 5  | K.IIQLLDDYPK.C                                                                 |
|                    | Hs293FLP_TREX_Ti_102.2   | 2.6918 | 0.1248 | 1217.42 | 1218.44 | 8044.9 | 6 | 881.5  | 77.8 | 1  | K.IIQLLDDYPK.C                                                                 |
|                    | HsFLAG-Control_293_Ti_20 | 1.9261 | 0.1093 | 717.4   | 717.945 | 9229.4 | 7 | 653.9  | 66.7 | 1  | K.AVVLGMK.N                                                                    |
|                    | Hs293FLP_TREX_Ti_104.1   | 3.5837 | 0.2958 | 1224.39 | 1222.34 | 4949.4 | 1 | 708    | 75   | 5  | R.GHLENNPALEK.L                                                                |
|                    | HsGST-MOCK_Ti_303.337    | 3.46   | 0.3459 | 1314.16 | 1314.52 | 8487.9 | 1 | 1474.2 | 77.3 | 2  | K.TSFFQALGITTK.I                                                               |
|                    | HsFLAG-Control_Hela_Ti_1 | 4.4724 | 0.5001 | 2753.01 | 2754.16 | 4979.7 | 1 | 1139.4 | 48.3 | 5  | K.AFLADPSAFVAAAPVAAATTAAPAAAAAPAK.V                                            |
| gi 4506407 ref NF  |                          | 2      | 4      | 0.224   | 201     | 23310  |   |        |      |    | RAN binding protein 1 [Homo sapiens]                                           |
| *                  | Hs293FLP-MG_Ti_203.255   | 5.0324 | 0.4019 | 3935.58 | 3936.02 | 8850.2 | 1 | 766.4  | 24.2 | 2  | K.DTHEDHDTSTENTDESNDHPQFEPVSLPEQEI.K.T                                         |
|                    | HsFLAG-Control_MG_293_   | 3.4639 | 0.2523 | 1382.24 | 1382.46 | 4899.7 | 1 | 839.8  | 80   | 2  | K.TLEEDDEELFK.M                                                                |
| gi 4506617 ref NF  |                          | 4      | 15     | 0.223   | 184     | 21397  |   |        |      |    | ribosomal protein L17 [Homo sapiens]                                           |
| gi 89039066 ref NF |                          | 4      | 15     | 0.223   | 184     | 21313  |   |        |      |    | PREDICTED: similar to 60S ribosomal protein L17 (L23) isoform 5 [Homo sapiens] |

|                         |        |        |         |         |        |      |        |                                                                                |   |                                  |
|-------------------------|--------|--------|---------|---------|--------|------|--------|--------------------------------------------------------------------------------|---|----------------------------------|
| gi 89039064 ref >       | 4      | 15     | 0.223   | 184     | 21313  | 10.1 | U      | PREDICTED: similar to 60S ribosomal protein L17 (L23) isoform 4 [Homo sapiens] |   |                                  |
| gi 89039062 ref >       | 4      | 15     | 0.223   | 184     | 21313  | 10.1 | U      | PREDICTED: similar to 60S ribosomal protein L17 (L23) isoform 3 [Homo sapiens] |   |                                  |
| gi 89039060 ref >       | 4      | 15     | 0.223   | 184     | 21313  | 10.1 | U      | PREDICTED: similar to 60S ribosomal protein L17 (L23) isoform 2 [Homo sapiens] |   |                                  |
| gi 89039058 ref >       | 4      | 15     | 0.223   | 184     | 21313  | 10.1 | U      | PREDICTED: similar to 60S ribosomal protein L17 (L23) isoform 1 [Homo sapiens] |   |                                  |
| gi 89038352 ref >       | 4      | 15     | 0.223   | 184     | 21313  | 10.1 | U      | PREDICTED: similar to 60S ribosomal protein L17 (L23) isoform 2 [Homo sapiens] |   |                                  |
| gi 89038350 ref >       | 4      | 15     | 0.223   | 184     | 21313  | 10.1 | U      | PREDICTED: similar to 60S ribosomal protein L17 (L23) isoform 1 [Homo sapiens] |   |                                  |
| gi 88947794 ref >       | 4      | 15     | 0.223   | 184     | 21399  | 10.1 | U      | PREDICTED: similar to 60S ribosomal protein L17 (L23) isoform 2 [Homo sapiens] |   |                                  |
| gi 88947792 ref >       | 4      | 15     | 0.223   | 184     | 21399  | 10.1 | U      | PREDICTED: similar to 60S ribosomal protein L17 (L23) isoform 1 [Homo sapiens] |   |                                  |
| gi 88943958 ref >       | 4      | 15     | 0.223   | 184     | 21455  | 10.2 | U      | PREDICTED: similar to 60S ribosomal protein L17 (L23) isoform 6 [Homo sapiens] |   |                                  |
| gi 88943956 ref >       | 4      | 15     | 0.223   | 184     | 21455  | 10.2 | U      | PREDICTED: similar to 60S ribosomal protein L17 (L23) isoform 5 [Homo sapiens] |   |                                  |
| gi 88943954 ref >       | 4      | 15     | 0.223   | 184     | 21455  | 10.2 | U      | PREDICTED: similar to 60S ribosomal protein L17 (L23) isoform 4 [Homo sapiens] |   |                                  |
| gi 88943952 ref >       | 4      | 15     | 0.223   | 184     | 21455  | 10.2 | U      | PREDICTED: similar to 60S ribosomal protein L17 (L23) isoform 3 [Homo sapiens] |   |                                  |
| gi 88943950 ref >       | 4      | 15     | 0.223   | 184     | 21455  | 10.2 | U      | PREDICTED: similar to 60S ribosomal protein L17 (L23) isoform 2 [Homo sapiens] |   |                                  |
| gi 88943948 ref >       | 4      | 15     | 0.223   | 184     | 21455  | 10.2 | U      | PREDICTED: similar to 60S ribosomal protein L17 (L23) isoform 1 [Homo sapiens] |   |                                  |
| gi 88942753 ref >       | 4      | 15     | 0.223   | 184     | 21399  | 10.1 | U      | PREDICTED: similar to 60S ribosomal protein L17 (L23) isoform 2 [Homo sapiens] |   |                                  |
| gi 88942751 ref >       | 4      | 15     | 0.223   | 184     | 21399  | 10.1 | U      | PREDICTED: similar to 60S ribosomal protein L17 (L23) isoform 1 [Homo sapiens] |   |                                  |
| HsHeLa_Control-MG_Ti_20 | 3.5242 | 0.2436 | 1189.1  | 1189.46 | 7818.5 | 1    | 1089.5 | 72.2                                                                           | 3 | K.SAEFLLHMLK.N                   |
| Hs293FLP-MG_Ti_203.301  | 4.6944 | 0.4338 | 1780.61 | 1780.03 | 6847   | 1    | 1370.6 | 70                                                                             | 9 | K.GLVDVSLVIEHIQVNK.A             |
| HsHeLa_Control-MG_Ti_20 | 3.4181 | 0.2536 | 1624.6  | 1624.83 | 4546.7 | 1    | 596.3  | 69.2                                                                           | 1 | K.EQIVPKPEEEVAQK.K               |
| HsGST-MOCK_Ti_102.137   | 2.934  | 0.3134 | 1752.67 | 1753.01 | 4612.7 | 1    | 561.4  | 60.7                                                                           | 2 | K.EQIVPKPEEEVAQKK.K              |
| gi 48762932 ref >       | 10     | 20     | 0.221   | 548     | 59621  | 5.6  | U      | chaperonin containing TCP1, subunit 8 (theta) [Homo sapiens]                   |   |                                  |
| HsFLAG-Control_HeLa_S1( | 3.7321 | 0.2232 | 1334.48 | 1334.56 | 7369.3 | 1    | 1511.3 | 81.8                                                                           | 1 | K.LFVTNDAATILR.E                 |
| HsFLAG-Control_HeLa_NE  | 3.0197 | 0.2395 | 1122.43 | 1122.27 | 9013.1 | 3    | 868.6  | 72.2                                                                           | 3 | R.ELEVQHPAAK.M                   |
| HsFLAG-Control_HeLa_S1( | 3.3415 | 0.264  | 1613.06 | 1612.8  | 3695.6 | 1    | 819.6  | 73.1                                                                           | 1 | K.AHEILPNLVCCSAK.N               |
| HsFLAG-Control_HeLa_S1( | 3.648  | 0.1603 | 1147.25 | 1147.27 | 9565.4 | 3    | 1505.8 | 83.3                                                                           | 2 | R.DIDEVSSLLR.T                   |
| Hs293FLP_Ti_305.1678.16 | 3.568  | 0.2546 | 1511.98 | 1511.76 | 6158.8 | 1    | 950.1  | 64.3                                                                           | 4 | K.RLVPGGGATEIELAK.Q              |
| HsFLAG-Control_HeLa_S1( | 3.6874 | 0.4294 | 2058.03 | 2059.25 | 7214.5 | 1    | 708.2  | 50                                                                             | 1 | K.QITSYGETCPGLEQYAIK.K           |
| HsFLAG-Control_HeLa_S1( | 3.6668 | 0.1848 | 1150.97 | 1151.31 | 6885.3 | 1    | 1644.9 | 94.4                                                                           | 2 | K.FAEAFEAIPIR.A                  |
| HsFLAG-Control_HeLa_S1( | 2.4607 | 0.1517 | 1158.31 | 1159.29 | 6148.9 | 1    | 680.3  | 72.2                                                                           | 2 | K.LYAVHQEGNK.N                   |
| HsFLAG-Control_HeLa_S1( | 3.6867 | 0.2562 | 1129.52 | 1129.35 | 8610.2 | 1    | 1595.7 | 85                                                                             | 3 | K.LATNAAVTVLR.V                  |
| HsFLAG-Control_HeLa_S1( | 2.0003 | 0.1521 | 992.72  | 993.151 | 6404.7 | 2    | 568.4  | 60                                                                             | 1 | K.PAGGPKPPSGK.K                  |
| gi 42544172 ref >       | 7      | 9      | 0.219   | 581     | 62711  | 6.7  | U      | E74-like factor 2 (ets domain transcription factor) isoform 1 [Homo sapiens]   |   |                                  |
| gi 6857816 ref >        | 7      | 9      | 0.238   | 533     | 57389  | 9    | U      | E74-like factor 2 (ets domain transcription factor) isoform 2 [Homo sapiens]   |   |                                  |
| HsHeLa3_Ti_106.3831.383 | 4.7175 | 0.3653 | 2071.68 | 2070.35 | 6867.6 | 1    | 1108.1 | 59.4                                                                           | 1 | K.GNTTYLWEFLLDLLQDK.N            |
| HsHeLa3_Ti_102.1274.127 | 4.6977 | 0.3908 | 1671.51 | 1670.65 | 7096.8 | 1    | 1369.5 | 71.4                                                                           | 2 | K.SETCNEDLAGTTDEK.S              |
| HsHeLa3_Ti_105.1350.135 | 2.6597 | 0.1471 | 1440.42 | 1440.56 | 4837.2 | 1    | 714.8  | 69.2                                                                           | 1 | R.VVNITSPGHDASSR.S               |
| HsHeLa3_Ti_103.2115.211 | 2.5012 | 0.3241 | 2700.3  | 2701.05 | 5355.4 | 1    | 322.2  | 31.5                                                                           | 1 | K.ISTVAVQSVNAGAPLITSTSPPTATSPK.V |
| HsHeLa3_Ti_104.2341.234 | 3.0336 | 0.3964 | 1928.94 | 1928.25 | 3761.8 | 1    | 335.7  | 53.1                                                                           | 1 | K.IITIPATQLAQCLQTK.S             |
| HsHeLa3_Ti_106.2179.217 | 3.3781 | 0.4534 | 1551.18 | 1550.86 | 8002.8 | 1    | 1051.2 | 60.7                                                                           | 1 | R.ALTPVSIAGTVPVLR.L              |
| HsHeLa3_Ti_106.2467.246 | 4.7768 | 0.4136 | 2122.04 | 2121.59 | 5994.1 | 1    | 1065.5 | 55                                                                             | 2 | K.TVTHVVVVSAPSAIALPVTMK.T        |
| gi 4757766 ref >        | 8      | 15     | 0.219   | 439     | 50436  | 6.3  | U      | Rho GTPase activating protein 1 [Homo sapiens]                                 |   |                                  |
| HsFLAG-Control_HeLa_S1( | 2.6552 | 0.1294 | 1213.58 | 1211.32 | 7626.8 | 1    | 767.7  | 75                                                                             | 1 | R.HQIVEVAGDDK.Y                  |
| HsFLAG-Control_HeLa_S1( | 3.3069 | 0.1444 | 1407.03 | 1405.64 | 5059.2 | 1    | 739.7  | 68.2                                                                           | 3 | K.NPEQEPIPIVLR.E                 |
| HsFLAG-Control_HeLa_S1( | 2.813  | 0.3974 | 2021.76 | 2021.28 | 8685.4 | 1    | 543    | 44.1                                                                           | 1 | R.ETVAYLQAHALTTGIFR.R            |
| HsFLAG-Control_HeLa_S1( | 2.6085 | 0.1178 | 2312.19 | 2312.67 | 6408.5 | 5    | 269.4  | 34.2                                                                           | 1 | R.VPATLQVLQTLPEENYQVLR.F         |
| HsFLAG-Control_HeLa_NE  | 4.6438 | 0.3156 | 2312.49 | 2312.67 | 5192.5 | 1    | 678    | 50                                                                             | 5 | R.VPATLQVLQTLPEENYQVLR.F         |
| HsFLAG-Control_HeLa_S1( | 3.9562 | 0.1532 | 2312.61 | 2312.67 | 5182.2 | 6    | 641.3  | 35.5                                                                           | 1 | R.VPATLQVLQTLPEENYQVLR.F         |
| HsFLAG-Control_HeLa_S1( | 4.8296 | 0.2729 | 1921.56 | 1920.18 | 9253.7 | 1    | 1994.5 | 71.9                                                                           | 2 | R.FLTAFLVQISAHSDQNK.M            |
| HsFLAG-Control_HeLa_S1( | 3.0025 | 0.1061 | 1969.51 | 1970.19 | 4989.5 | 1    | 623.6  | 52.9                                                                           | 1 | K.FLLDHQGELFPPSPDPSGL.-          |

|                   |                          |        |        |         |         |        |                                                                       |        |      |                                |
|-------------------|--------------------------|--------|--------|---------|---------|--------|-----------------------------------------------------------------------|--------|------|--------------------------------|
| gi 23308577 ref N | 14                       | 45     | 0.216  | 533     | 56651   | 6.7 U  | phosphoglycerate dehydrogenase [Homo sapiens]                         |        |      |                                |
| *                 | HsFLAG-Control_HeLa_S1(  | 2.797  | 0.1609 | 1298.59 | 1299.51 | 8662.6 | 5                                                                     | 613    | 59.1 | 1 K.ILQDGGLQVVEK.Q             |
| *                 | HsFLAG-Control_HeLa_S1(  | 4.2596 | 0.2463 | 1299.28 | 1299.51 | 8185.4 | 1                                                                     | 2222.7 | 90.9 | 5 K.ILQDGGLQVVEK.Q             |
| *                 | HsFLAG-Control_HeLa_S1(  | 3.7534 | 0.2736 | 1131.33 | 1131.27 | 6365.6 | 1                                                                     | 1249   | 85   | 5 K.VTADVINAEEK.L              |
| *                 | HsFLAG-Control_HeLa_S1(  | 4.2436 | 0.3918 | 1489.41 | 1489.58 | 7220.3 | 1                                                                     | 1217.6 | 71.4 | 9 R.AGTGVDNVDLEAATR.K          |
| *                 | HsFLAG-Control_HeLa_S1(  | 3.3568 | 0.2833 | 1618.31 | 1617.76 | 8905.7 | 1                                                                     | 696.1  | 50   | 1 R.AGTGVDNVDLEAATR.K          |
| *                 | HsHeLa_Control-MG_Ti_20  | 5.7766 | 0.4422 | 2048.68 | 2049.26 | 9901.3 | 1                                                                     | 1494.8 | 58.3 | 1 R.ALVDHENVISCPHLGASTK.E      |
| *                 | HsFLAG-Control_HeLa_S1(  | 5.5782 | 0.4495 | 2048.78 | 2049.26 | 8441.1 | 1                                                                     | 1373.5 | 58.3 | 2 R.ALVDHENVISCPHLGASTK.E      |
| *                 | HsFLAG-Control_HeLa_S1(  | 4.6624 | 0.3136 | 2050.23 | 2049.26 | 9262.2 | 1                                                                     | 1536.6 | 40.3 | 2 R.ALVDHENVISCPHLGASTK.E      |
| *                 | HsFLAG-Control_HeLa_S1(  | 5.0585 | 0.5534 | 2029.69 | 2030.29 | 9995.9 | 1                                                                     | 1173.1 | 50   | 2 K.SLTGVVNAQALTSAFSPHTK.P     |
| *                 | HsFLAG-Control_HeLa_S1(  | 2.6854 | 0.1328 | 1345.52 | 1346.57 | 7210.8 | 5                                                                     | 398.8  | 50   | 2 K.GTIQVITQGTSLK.N            |
| *                 | HsFLAG-Control_HeLa_S1(  | 4.2001 | 0.366  | 1345.97 | 1346.57 | 6432.5 | 1                                                                     | 1292.8 | 79.2 | 5 K.GTIQVITQGTSLK.N            |
| *                 | HsFLAG-Control_HeLa_S1(  | 3.8303 | 0.3535 | 1347.22 | 1346.57 | 7450.7 | 1                                                                     | 1633   | 79.2 | 2 K.GTIQVITQGTSLK.N            |
| *                 | HsFLAG-Control_HeLa_S1(  | 4.6069 | 0.3931 | 1625.98 | 1626.9  | 5234.8 | 1                                                                     | 903.9  | 66.7 | 7 K.NAGNCLSPAVIVGLLK.E         |
| *                 | HsFLAG-Control_HeLa_S1(  | 2.6577 | 0.1196 | 986.3   | 987.23  | 4176.9 | 3                                                                     | 733.2  | 85.7 | 1 R.DLPLLLFR.T                 |
| gi 32307148 ref N | 15                       | 56     | 0.215  | 1046    | 116924  | 6.7 U  | O-linked GlcNAc transferase isoform 1 [Homo sapiens]                  |        |      |                                |
| *                 | HsHeLa_Control-MG_Ti_10  | 2.6237 | 0.1842 | 1474.25 | 1473.73 | 5440.7 | 8                                                                     | 457.7  | 54.2 | 1 R.MLSFQGLAELAHR.E            |
| *                 | Hs283FLP_Ti_106.1999.19  | 2.3033 | 0.1844 | 1074.57 | 1075.25 | 4283   | 1                                                                     | 513.3  | 66.7 | 2 R.SAHFSTLAIK.Q               |
| *                 | HsHeLa_Control_Ti_102.43 | 5.1897 | 0.3309 | 2190.87 | 2191.53 | 5183.7 | 1                                                                     | 1321.2 | 65.8 | 21 K.AVTLDPNFLDAYINLGNVLK.E    |
| *                 | HsHeLa_Control_Ti_104.35 | 2.9291 | 0.3211 | 2286.5  | 2286.56 | 4625.1 | 1                                                                     | 312.4  | 39.5 | 2 R.AIELQPHFPDAYCNLANALK.E     |
| *                 | HsF-IP-293-MG_Ti_102.16  | 2.658  | 0.3262 | 1657.42 | 1656.71 | 7401.1 | 1                                                                     | 650.6  | 53.6 | 1 K.GSVAEAEEDCYNTALR.L         |
| *                 | Hs293FLP_Ti_304.1758.17  | 4.0217 | 0.4033 | 1783.28 | 1781.97 | 6625.3 | 1                                                                     | 1154.3 | 66.7 | 6 R.LCPHADSLNLANIK.R           |
| *                 | HsHeLa_Control_Ti_105.36 | 5.1462 | 0.3624 | 2556.9  | 2556.88 | 7516.5 | 1                                                                     | 1007.3 | 45.7 | 7 K.ALEVFPFAAAHSNLSVQLQQGK.L   |
| *                 | HsHeLa_Control_Ti_106.29 | 4.7165 | 0.4207 | 2122.26 | 2119.39 | 5439.1 | 1                                                                     | 874.4  | 55.3 | 1 R.AIQINPAFADAHSNLSIHK.D      |
| *                 | HsHeLa_Control_Ti_102.21 | 2.8144 | 0.1837 | 1394.44 | 1393.5  | 3050.6 | 3                                                                     | 442.4  | 62.5 | 2 K.DSGNIPEAIASR.T             |
| *                 | HsHeLa_Control-MG_Ti_10  | 3.0676 | 0.249  | 1344.1  | 1343.61 | 6020.6 | 1                                                                     | 1056.8 | 72.7 | 1 K.KLVSIVADQLEK.N             |
| *                 | Hs283FLP_Ti_102.1902.19  | 2.7057 | 0.2068 | 1216    | 1215.43 | 5744   | 6                                                                     | 560.5  | 65   | 1 K.LVSIVADQLEK.N              |
| *                 | HsHeLa_Control-MG_Ti_10  | 4.2227 | 0.3564 | 2423.01 | 2423.65 | 4955.4 | 1                                                                     | 997.7  | 57.9 | 4 R.SQYGLPEDAIVYCENFNQLYK.I    |
| *                 | HsHeLa_Control_Ti_106.28 | 2.6137 | 0.3614 | 1623.29 | 1622.91 | 4231.2 | 1                                                                     | 678.3  | 69.2 | 1 R.IIFSPVAPKEEHVR.R           |
| *                 | HsFlag1P_Ti_104.3185.318 | 4.7488 | 0.4245 | 1847.4  | 1848.12 | 7622.3 | 1                                                                     | 1773.1 | 68.8 | 5 R.VAASQLTCLGCLLEIAK.N        |
| *                 | Hs283FLP_Ti_103.1375.13  | 4.0412 | 0.2068 | 1366.1  | 1365.49 | 5496.2 | 2                                                                     | 1195.6 | 85   | 1 K.NRQEYEDIAVK.L              |
| gi 4503531 ref NF | 6                        | 56     | 0.214  | 407     | 46394   | 5.5 U  | eukaryotic translation initiation factor 4A, isoform 2 [Homo sapiens] |        |      |                                |
| *                 | HsFLAG-Control_HeLa_NE   | 4.3475 | 0.477  | 1828.66 | 1829.07 | 5470.9 | 1                                                                     | 956.4  | 66.7 | 13 R.GIYAYGFEKPSAIQQR.A        |
| *                 | HsFLAG-Control_HeLa_NE   | 4.8509 | 0.4125 | 1396.71 | 1395.51 | 5929.6 | 1                                                                     | 1620.3 | 84.6 | 3 K.GYDVIAQAQSGTGK.T           |
| *                 | HsFLAG-Control_HeLa_S1(  | 4.0881 | 0.4445 | 1545.49 | 1545.78 | 7019.7 | 1                                                                     | 1315.4 | 71.4 | 1 K.LQAEAPHIVVGTGPR.V          |
| *                 | HsFLAG-Control_HeLa_NE   | 3.3775 | 0.2405 | 1115.66 | 1115.36 | 4998.5 | 2                                                                     | 1015   | 88.9 | 15 R.VLITDILLAR.G              |
| *                 | HsFLAG-Control_HeLa_S1(  | 5.2214 | 0.4321 | 2146.44 | 2145.42 | 9669.9 | 1                                                                     | 1812.5 | 61.1 | 22 R.GIDVQQVSLVINYLPTNR.E      |
| *                 | HsFLAG-Control_HeLa_NE   | 3.2034 | 0.2903 | 1479.37 | 1478.65 | 7162.5 | 2                                                                     | 674.3  | 62.5 | 2 K.GVAINFVTEEDKR.I            |
| gi 24234747 ref N | 7                        | 17     | 0.213  | 390     | 43062   | 5.3 U  | interleukin enhancer binding factor 2 [Homo sapiens]                  |        |      |                                |
| *                 | HsFLAG-Control_HeLa_NE   | 3.5749 | 0.3317 | 1732.62 | 1732.97 | 4773.1 | 1                                                                     | 737.8  | 66.7 | 5 R.VKPAPDETSFSEALLK.R         |
| *                 | HsFLAG-Control_HeLa_NE   | 4.7438 | 0.4595 | 2101.68 | 2100.33 | 4048.2 | 1                                                                     | 744.4  | 60.5 | 3 R.NQDLAPNSAEQASILSLVTK.I     |
| *                 | HsHeLa3_Ti_104.4007.400  | 3.4109 | 0.1166 | 2584.49 | 2583.94 | 4874.1 | 3                                                                     | 354.6  | 38.6 | 1 K.INNVIDNLIVAPGTFFEVQIEEVR.Q |
| *                 | HsFLAG-Control_HeLa_NE   | 4.8918 | 0.3055 | 2585.37 | 2583.94 | 9198.3 | 1                                                                     | 1711   | 37.5 | 1 K.INNVIDNLIVAPGTFFEVQIEEVR.Q |
| *                 | HsHeLa3_Ti_104.2901.290  | 4.3742 | 0.3415 | 1410.52 | 1410.7  | 4854.7 | 1                                                                     | 1315.9 | 84.6 | 4 K.ILPTLEAVAALGNK.V           |
| *                 | HsHeLa3_Ti_104.2908.291  | 3.0799 | 0.4022 | 1410.75 | 1410.7  | 7534.9 | 1                                                                     | 646.3  | 57.7 | 1 K.ILPTLEAVAALGNK.V           |
| *                 | HsHeLa3_Ti_104.1865.186  | 3.6178 | 0.1791 | 1043.48 | 1042.27 | 7171.2 | 1                                                                     | 2055.5 | 94.4 | 2 K.VLQSALAAIR.H               |
| gi 15431295 ref N | 9                        | 25     | 0.213  | 211     | 24261   | 11.7 U | ribosomal protein L13 [Homo sapiens]                                  |        |      |                                |
| gi 15431297 ref N | 9                        | 25     | 0.213  | 211     | 24261   | 11.7 U | ribosomal protein L13 [Homo sapiens]                                  |        |      |                                |
| *                 | Hs293FLP_TREX_Ti_106.2   | 3.5193 | 0.321  | 1346.98 | 1346.53 | 8825.1 | 1                                                                     | 1102.5 | 75   | 2 R.RVATWFNQPAR.K              |



|                   |                         |        |        |         |         |         |      |        |      |    |                                                                    |
|-------------------|-------------------------|--------|--------|---------|---------|---------|------|--------|------|----|--------------------------------------------------------------------|
|                   | Hs293FLP_TREX_Ti_103.1  | 2.9829 | 0.2068 | 1191.36 | 1190.35 | 5747.5  | 1    | 983.4  | 88.9 | 2  | R.VATWFNQPAR.K                                                     |
|                   | Hs293FLP_TREX_Ti_102.2  | 2.5001 | 0.1878 | 951.36  | 951.067 | 5651.7  | 2    | 939.3  | 85.7 | 1  | R.GFSLEELR.V                                                       |
|                   | Hs293FLP_TREX_Ti_102.1  | 2.2863 | 0.2085 | 1232.42 | 1233.32 | 4297.7  | 2    | 238.2  | 60   | 1  | K.STESLQANVQR.L                                                    |
|                   | HsF-IP-293-MG_Ti_102.12 | 3.7563 | 0.3187 | 1233.15 | 1233.32 | 6321.4  | 1    | 1432.1 | 85   | 4  | K.STESLQANVQR.L                                                    |
|                   | HsFLAG-MOCK_300mM_T     | 4.2406 | 0.2782 | 1233.38 | 1233.32 | 6665.6  | 1    | 1638.9 | 90   | 2  | K.STESLQANVQR.L                                                    |
|                   | Hs293FLP_TREX_Ti_104.1  | 3.6726 | 0.2513 | 1474.58 | 1474.66 | 7070.8  | 1    | 1100.7 | 66.7 | 2  | K.STESLQANVQR.LK.E                                                 |
|                   | Hs293FLP-MG_Ti_105.198  | 3.9903 | 0.3168 | 1383.35 | 1383.69 | 6048.4  | 2    | 1075.6 | 75   | 10 | K.LATQLTGPVMPVR.N                                                  |
|                   | HsHeLa_Control-MG_Ti_10 | 2.1957 | 0.2205 | 1383.92 | 1383.69 | 2842.6  | 9    | 102.2  | 50   | 1  | K.LATQLTGPVMPVR.N                                                  |
| gi 27436929 ref N |                         | 21     | 251    | 0.212   | 641     | 70405   | 6    | U      |      |    | heat shock 70kDa protein 1-like [Homo sapiens]                     |
|                   | HsF-IP-293-MG_Ti_102.17 | 2.6315 | 0.2566 | 1487.66 | 1488.59 | 3419.2  | 1    | 176.5  | 58.3 | 2  | R.TTPSYVAFTDTER.L                                                  |
|                   | Hs293FLP-MG_Ti_202.217  | 3.2886 | 0.3043 | 1487.89 | 1488.59 | 4372.6  | 1    | 860.7  | 83.3 | 12 | R.TTPSYVAFTDTER.L                                                  |
|                   | HsFLAG-Control_HeLa_NE  | 3.2444 | 0.2808 | 1487.89 | 1488.59 | 4634.5  | 1    | 570.4  | 66.7 | 57 | R.TTPSYVAFTDTER.L                                                  |
|                   | HsHeLa_Control-MG_Ti_20 | 2.4813 | 0.2055 | 1488.47 | 1488.59 | 3249.8  | 1    | 121.1  | 50   | 1  | R.TTPSYVAFTDTER.L                                                  |
|                   | HsHeLa_Control-MG_Ti_20 | 3.6044 | 0.4296 | 1489.1  | 1488.59 | 3675.9  | 1    | 589.8  | 75   | 9  | R.TTPSYVAFTDTER.L                                                  |
|                   | HsFLAG-MOCK_300mM_T     | 3.2112 | 0.1491 | 2159.14 | 2157.39 | 6487.7  | 1    | 523.9  | 44.7 | 2  | R.TTPSYVAFTDTERLIGDAAK.N                                           |
|                   | HsGST-MOCK_Ti_302.323   | 3.467  | 0.4254 | 1615.76 | 1615.88 | 4904.2  | 1    | 879.9  | 76.9 | 1  | K.AFYPEEISSMVLTK.L                                                 |
|                   | Hs293FLP-MG_Ti_202.302  | 2.4988 | 0.215  | 1197.55 | 1198.41 | 3227.7  | 3    | 256.7  | 59.1 | 2  | K.DAGVIAGLNVL.R.I                                                  |
|                   | HsFLAG-Control_HeLa_S1  | 4.4911 | 0.242  | 1198.36 | 1198.41 | 6241.2  | 1    | 1789.9 | 90.9 | 34 | K.DAGVIAGLNVL.R.I                                                  |
|                   | Hs293FLP-MG_Ti_202.302  | 4.3885 | 0.222  | 1198.53 | 1198.41 | 6626.9  | 1    | 1848   | 90.9 | 8  | K.DAGVIAGLNVL.R.I                                                  |
|                   | HsHeLa_Control-MG_Ti_20 | 5.5061 | 0.3911 | 1661.88 | 1660.91 | 4282.5  | 1    | 1591.7 | 86.7 | 75 | R.IINEPTAAAIAVGLDK.G                                               |
|                   | HsFLAG-Control_293_Ti_2 | 4.5503 | 0.4103 | 1677.37 | 1676.7  | 7130.1  | 1    | 1456.7 | 70   | 19 | K.ATAGDTHLGGEDFDNR.L                                               |
|                   | HsGST-MOCK_Ti_403.434   | 4.8873 | 0.4836 | 2303.72 | 2305.61 | 7751.9  | 1    | 1475.4 | 54.5 | 11 | K.SINPDEAVAYGAAVQAAIIMGDK.S                                        |
|                   | HsGST-MOCK_Ti_403.436   | 5.5284 | 0.3617 | 2305.81 | 2305.61 | 9393.7  | 1    | 2713.4 | 44.3 | 1  | K.SINPDEAVAYGAAVQAAIIMGDK.S                                        |
|                   | HsGST-MOCK_Ti_303.335   | 2.5776 | 0.2963 | 2786.6  | 2788.04 | 7450.8  | 1    | 473.9  | 37   | 1  | K.QTQIFTTYSDNQPGVLIQVYEGER.A                                       |
|                   | Hs293FLP-MG_Ti_204.321  | 4.2945 | 0.5036 | 2787.69 | 2788.04 | 6064.2  | 1    | 769.6  | 45.7 | 4  | K.QTQIFTTYSDNQPGVLIQVYEGER.A                                       |
|                   | Hs293FLP-MG_Ti_205.311  | 5.4004 | 0.3198 | 2788.58 | 2788.04 | 11083.1 | 1    | 1393.9 | 33.7 | 2  | K.QTQIFTTYSDNQPGVLIQVYEGER.A                                       |
|                   | HsFLAG-Control_HeLa_S1  | 3.5026 | 0.3748 | 2788.84 | 2788.04 | 6443.9  | 1    | 586    | 41.3 | 2  | K.QTQIFTTYSDNQPGVLIQVYEGER.A                                       |
|                   | HsFLAG-Control_HeLa_NE  | 3.9327 | 0.3083 | 2788.9  | 2788.04 | 14432.1 | 5    | 820.7  | 26.1 | 2  | K.QTQIFTTYSDNQPGVLIQVYEGER.A                                       |
|                   | Hs293FLP_Ti_302.3136.31 | 4.1608 | 0.366  | 2789.84 | 2788.04 | 7098.1  | 1    | 800.1  | 31.5 | 1  | K.QTQIFTTYSDNQPGVLIQVYEGER.A                                       |
|                   | HsFLAG-Control_MG_293   | 3.8888 | 0.3065 | 1289.5  | 1288.46 | 6627.1  | 1    | 1451.2 | 85   | 5  | K.NALESYAFNMK.S                                                    |
| gi 14141152 ref N |                         | 11     | 28     | 0.208   | 730     | 77516   | 8.7  | U      |      |    | heterogeneous nuclear ribonucleoprotein M isoform a [Homo sapiens] |
| gi 14141154 ref N |                         | 11     | 28     | 0.22    | 691     | 73561   | 8.7  | U      |      |    | heterogeneous nuclear ribonucleoprotein M isoform b [Homo sapiens] |
|                   | HsFLAG-Control_HeLa_NE  | 2.216  | 0.0821 | 1066.37 | 1067.19 | 3681.6  | 6    | 361.8  | 75   | 1  | R.FEPYANPTK.R                                                      |
|                   | HsFLAG-Control_HeLa_NE  | 3.868  | 0.2018 | 1265.72 | 1265.5  | 4996.7  | 1    | 1034.7 | 85   | 8  | R.AFITNIPFDVK.W                                                    |
|                   | HsFLAG-Control_HeLa_NE  | 3.7321 | 0.3596 | 1427.65 | 1427.64 | 4358.7  | 1    | 607.8  | 66.7 | 5  | R.LGSTVFVANLDYK.V                                                  |
|                   | HsFLAG-Control_HeLa_NE  | 2.9836 | 0.1007 | 1104.05 | 1104.2  | 6868    | 6    | 1034.5 | 83.3 | 1  | R.ADILEDKDGK.S                                                     |
|                   | Hs293FLP_TREX_Ti_102.1  | 3.2779 | 0.0827 | 1116.31 | 1115.32 | 5455.2  | 2    | 1117.1 | 88.9 | 1  | R.INEILSNALK.R                                                     |
|                   | HsFLAG-Control_HeLa_NE  | 3.2831 | 0.3074 | 1285.68 | 1285.36 | 5859.7  | 2    | 478.6  | 60.7 | 1  | K.QGGGGGGGSSVPGIER.M                                               |
|                   | HsFLAG-MOCK_300mM_T     | 3.2819 | 0.1854 | 1873.97 | 1873.11 | 6297.9  | 1    | 439.7  | 47.1 | 2  | R.MGAGLGHGMDRVGSEIER.M                                             |
|                   | HsFLAG-MOCK_300mM_T     | 2.8053 | 0.3653 | 1615.63 | 1614.88 | 7348.6  | 1    | 653.6  | 53.6 | 1  | R.MGPLGLDHMASSIER.M                                                |
|                   | HsFLAG-MOCK_300mM_T     | 3.8495 | 0.4435 | 2036.26 | 2036.17 | 5789.9  | 1    | 776.9  | 45.5 | 4  | R.GNFGGSFAGSFGGAGGHAPGVAR.K                                        |
|                   | Hs293FLP_TREX_Ti_104.1  | 4.6316 | 0.3392 | 1566.56 | 1566.72 | 4920.3  | 1    | 1704.6 | 87.5 | 3  | K.FNECGHVLYADIK.M                                                  |
|                   | HsFLAG-MOCK_300mM_T     | 2.6979 | 0.164  | 1665.42 | 1664.82 | 4947.3  | 1    | 932    | 60.7 | 1  | K.GCGVVKFESPEVAER.A                                                |
| gi 4506633 ref NF |                         | 4      | 4      | 0.208   | 125     | 14463   | 10.5 | U      |      |    | ribosomal protein L31 [Homo sapiens]                               |
|                   | Hs293FLP_TREX_Ti_102.1  | 3.2685 | 0.1907 | 989.51  | 989.117 | 6740.7  | 1    | 1268.9 | 87.5 | 1  | R.SAINEVVTR.E                                                      |
|                   | Hs293FLP_TREX_Ti_106.2  | 1.9224 | 0.154  | 757.65  | 757.911 | 3434.5  | 4    | 254.8  | 75   | 1  | R.IHGVGFK.K                                                        |
| *                 | Hs293FLP_TREX_Ti_101.0  | 2.901  | 0.1704 | 1145.31 | 1146.2  | 7342.2  | 1    | 753    | 77.8 | 1  | K.NLQTVNVDEN.-                                                     |
| *                 | Hs293FLP_TREX_Ti_101.0  | 2.9897 | 0.2234 | 1147.22 | 1146.2  | 3924    | 1    | 761.6  | 83.3 | 1  | K.NLQTVNVDEN.-                                                     |
| gi 4506605 ref NF |                         | 3      | 21     | 0.207   | 140     | 14865   | 10.5 | U      |      |    | ribosomal protein L23 [Homo sapiens]                               |

|                    |                          |        |        |         |         |         |      |        |      |    |                                                                             |
|--------------------|--------------------------|--------|--------|---------|---------|---------|------|--------|------|----|-----------------------------------------------------------------------------|
| *                  | HsFLAG-Control_293_Ti_20 | 4.6787 | 0.3493 | 1970.77 | 1971.23 | 5128.4  | 1    | 965.6  | 63.2 | 18 | R.ISLGLPVGAVINCADNTGAK.N                                                    |
| *                  | HsGST-MOCK_Ti_106.2010   | 2.2358 | 0.1769 | 1018.44 | 1019.28 | 5355.3  | 2    | 574    | 81.2 | 1  | K.KVHPAVVIR.Q                                                               |
| *                  | HsGST-MOCK_Ti_106.2000   | 2.6347 | 0.365  | 1020.6  | 1019.28 | 3875.3  | 1    | 603    | 87.5 | 2  | K.KVHPAVVIR.Q                                                               |
| gi 46195723 ref NF |                          | 7      | 15     | 0.206   | 490     | 54774   | 10.1 | U      |      |    | ribosomal L1 domain containing 1 [Homo sapiens]                             |
| *                  | Hs293FLP_TREX_Ti_104.1   | 3.3333 | 0.2626 | 1128.19 | 1128.28 | 7113.1  | 1    | 1247.8 | 83.3 | 1  | K.AVDALLTHCK.S                                                              |
| *                  | Hs293FLP_TREX_Ti_103.2   | 3.6781 | 0.1854 | 1332.61 | 1331.6  | 5725.5  | 1    | 1094.4 | 81.8 | 2  | K.TVSQIISLQTLK.K                                                            |
| *                  | HsFLAG-Control_HeLa_NE   | 3.6559 | 0.4081 | 1532.56 | 1532.74 | 8390.3  | 1    | 1290   | 70.8 | 1  | R.LLSSFDFFLTDAR.I                                                           |
| *                  | Hs293FLP_TREX_Ti_104.1   | 2.7401 | 0.1813 | 1116.15 | 1116.3  | 4862.8  | 1    | 812.7  | 87.5 | 1  | K.LPEKWESVK.L                                                               |
| *                  | HsFLAG-Control_HeLa_NE   | 4.5597 | 0.4946 | 2070.16 | 2071.29 | 8419.2  | 1    | 1157.5 | 55.6 | 7  | K.SAALPIFSSFVSNWDEATK.R                                                     |
| *                  | Hs293FLP_TREX_Ti_102.1   | 5.1239 | 0.3092 | 2020.37 | 2021.19 | 6076.7  | 1    | 1129.8 | 57.9 | 2  | K.TASVLSKDDVAPESGDTTVK.K                                                    |
| *                  | Hs293FLP_TREX_Ti_104.2   | 3.0193 | 0.356  | 1968.31 | 1969.2  | 6543.7  | 1    | 505.2  | 47.1 | 1  | K.ATNESEDEIPLQVPIGKK.T                                                      |
| gi 60218913 ref NF |                          | 4      | 12     | 0.205   | 185     | 21228   | 7.9  | U      |      |    | calcyclin binding protein isoform 2 [Homo sapiens]                          |
| gi 7656952 ref NF  |                          | 4      | 12     | 0.167   | 228     | 26210   | 8.2  | U      |      |    | calcyclin binding protein isoform 1 [Homo sapiens]                          |
|                    | HsFLAG-Control_HeLa_S10  | 2.3756 | 0.2702 | 1488.6  | 1488.77 | 7067    | 1    | 535.6  | 53.6 | 1  | K.PAAVVAPITTGTYVK.I                                                         |
|                    | HsFLAG-Control_HeLa_S10  | 3.5256 | 0.4431 | 1489.17 | 1488.77 | 5662.8  | 1    | 1084.9 | 67.9 | 6  | K.PAAVVAPITTGTYVK.I                                                         |
|                    | HsFLAG-Control_HeLa_S10  | 3.9528 | 0.4105 | 1491.28 | 1488.77 | 4601.4  | 1    | 1042.8 | 71.4 | 4  | K.PAAVVAPITTGTYVK.I                                                         |
|                    | HsFLAG-Control_HeLa_S10  | 4.9689 | 0.3279 | 2683.02 | 2683.04 | 9671.2  | 2    | 873.7  | 30.7 | 1  | K.IYITLTGVHQVPTENVQVHFTER.S                                                 |
| gi 40254861 ref NF |                          | 13     | 42     | 0.204   | 1087    | 114543  | 7.1  | U      |      |    | ubiquitin associated protein 2-like [Homo sapiens]                          |
| *                  | HsFLAG-MOCK_300mM_T      | 2.795  | 0.1631 | 2065.24 | 2065.17 | 6711.1  | 1    | 472.3  | 46.9 | 1  | R.ARGNWEQPQNQNQTQHK.Q                                                       |
| *                  | HsFLAG-MOCK_300mM_T      | 2.9909 | 0.372  | 2129.71 | 2130.17 | 5980.1  | 1    | 512.2  | 44.1 | 1  | K.NQDECVIALHDCNGDVNR.A                                                      |
| *                  | HsFLAG-MOCK_300mM_T      | 4.411  | 0.4103 | 2210.9  | 2211.5  | 5372.2  | 1    | 998.4  | 57.9 | 3  | R.AINVLLGPNPDTHSWEMVGK.K                                                    |
| *                  | HsFLAG-Control_HeLa_NE   | 4.5976 | 0.4675 | 2241.35 | 2242.27 | 7169.3  | 1    | 1034   | 58.3 | 10 | R.TATEEWGTEDWNEDLSEK.I                                                      |
| *                  | HsFLAG-MOCK_300mM_T      | 5.2636 | 0.464  | 2349.92 | 2348.53 | 4737    | 1    | 1034.9 | 59.1 | 2  | K.GFGDVGEAKGGSTTGSQFLEQFK.T                                                 |
| *                  | HsFLAG-Control_HeLa_NE   | 3.2623 | 0.2024 | 1487.53 | 1487.61 | 9764.6  | 1    | 1125.5 | 61.5 | 1  | K.GGSTTGSQFLEQFK.T                                                          |
| *                  | HsFLAG-Control_HeLa_NE   | 4.2917 | 0.3574 | 1387.65 | 1387.49 | 11560.5 | 1    | 2081.4 | 79.2 | 9  | K.NPSDSAVHSPFTK.R                                                           |
| *                  | HsFLAG-MOCK_300mM_T      | 3.4805 | 0.2352 | 2130.94 | 2131.47 | 7537    | 1    | 901.5  | 52.9 | 1  | K.RQAFTPSSTMMEVFLQEK.S                                                      |
| *                  | HsFLAG-Control_HeLa_NE   | 3.6458 | 0.3911 | 1960.63 | 1961.22 | 3449.8  | 1    | 410.4  | 50   | 3  | K.SPAVATSTAAPPPSSPLPSK.S                                                    |
| *                  | HsFLAG-Control_HeLa_NE   | 3.7205 | 0.2392 | 1337.57 | 1337.48 | 6766.8  | 2    | 746.5  | 68.2 | 1  | R.RYPSSISSSPQK.D                                                            |
| *                  | HsFLAG-Control_HeLa_NE   | 2.9255 | 0.1046 | 2597.63 | 2597.8  | 8184.9  | 1    | 457.3  | 32   | 2  | K.NGFSSVQATQLQTTQSVGATGSQAVK.S                                              |
| *                  | HsFLAG-Control_HeLa_NE   | 3.8245 | 0.1943 | 2283.97 | 2284.62 | 3691.5  | 1    | 395.1  | 50   | 6  | R.FPLDYYSIPFPTPTPLTGR.D                                                     |
| *                  | HsFLAG-Control_HeLa_S10  | 3.7144 | 0.2938 | 1525.47 | 1525.61 | 7405.4  | 1    | 1115.6 | 67.9 | 2  | R.DGSLASNPYSGDLTK.F                                                         |
| gi 4504865 ref NF  |                          | 14     | 28     | 0.203   | 711     | 73161   | 7.3  | U      |      |    | KH-type splicing regulatory protein (FUSE binding protein 2) [Homo sapiens] |
| *                  | HsHeLa3_Ti_102.1597.159  | 2.6114 | 0.2573 | 992.58  | 993.064 | 2874.7  | 5    | 365    | 75   | 1  | K.DAFADAVQR.A                                                               |
| *                  | HsHeLa3_Ti_102.1601.160  | 3.3329 | 0.14   | 993.46  | 993.064 | 5263.6  | 1    | 1547.6 | 93.8 | 2  | K.DAFADAVQR.A                                                               |
| *                  | HsHeLa3_Ti_102.2075.207  | 5.01   | 0.4512 | 2154.87 | 2155.29 | 6132.2  | 1    | 892.6  | 50   | 5  | K.IGGDAATTVNNSTPDFGFGGQK.R                                                  |
| *                  | HsHeLa3_Ti_104.3205.320  | 4.1088 | 0.4202 | 2226.18 | 2225.58 | 7346.2  | 1    | 1370.2 | 40.8 | 2  | R.TSMTEYRVPDGMVGLIIGR.G                                                     |
| *                  | HsHeLa3_Ti_104.2811.281  | 3.5663 | 0.3863 | 1227.56 | 1227.51 | 6687.7  | 1    | 1691.1 | 90.9 | 2  | R.VPDGMVGLIIGR.G                                                            |
| *                  | HsHeLa3_Ti_103.1595.159  | 2.184  | 0.2667 | 1354.79 | 1355.49 | 3638.4  | 1    | 308.2  | 58.3 | 2  | K.VQISPDSSGGLPER.S                                                          |
| *                  | HsHeLa3_Ti_103.1596.159  | 4.0649 | 0.2719 | 1355.77 | 1355.49 | 4802.3  | 1    | 971.9  | 75   | 1  | K.VQISPDSSGGLPER.S                                                          |
| *                  | HsHeLa3_Ti_103.1515.151  | 2.2186 | 0.2626 | 1302.65 | 1303.46 | 5379.7  | 6    | 362.4  | 50   | 1  | R.SVSLTGAPESVQK.A                                                           |
| *                  | HsHeLa3_Ti_103.3078.307  | 4.4457 | 0.401  | 1594.53 | 1593.86 | 8173.5  | 1    | 1741.6 | 79.2 | 3  | K.VQQACEMVMDILR.E                                                           |
| *                  | HsHeLa3_Ti_104.1824.182  | 3.9042 | 0.1915 | 1080.69 | 1080.27 | 6166.7  | 1    | 1561.7 | 95   | 2  | R.IGGIDVPVPR.H                                                              |
| *                  | HsHeLa3_Ti_103.2611.261  | 3.9623 | 0.1056 | 1185.64 | 1185.41 | 5272.6  | 2    | 1289.9 | 94.4 | 2  | R.IINDLLQSLR.S                                                              |
| *                  | HsHeLa3_Ti_103.1807.180  | 2.6494 | 0.2016 | 1535.06 | 1534.71 | 8843.2  | 2    | 1031.6 | 61.5 | 1  | K.AINQQTGAFVEISR.Q                                                          |
| *                  | HsHeLa3_Ti_106.1894.189  | 4.4018 | 0.2837 | 2110.02 | 2110.33 | 5768.5  | 1    | 1194.3 | 63.9 | 3  | K.KIGQQPQQPGAPPQQDYTK.A                                                     |
| *                  | HsHeLa3_Ti_104.1367.136  | 3.6195 | 0.2457 | 1981.93 | 1982.16 | 4350.9  | 1    | 994.9  | 64.7 | 1  | K.IGQQPQQPGAPPQQDYTK.A                                                      |
| gi 66346679 ref NF |                          | 5      | 6      | 0.203   | 408     | 44965   | 8.6  | U      |      |    | SERPINE1 mRNA binding protein 1 isoform 1 [Homo sapiens]                    |
| gi 66346681 ref NF |                          | 5      | 6      | 0.206   | 402     | 44257   | 8.7  | U      |      |    | SERPINE1 mRNA binding protein 1 isoform 2 [Homo sapiens]                    |
|                    | HsGST-MOCK_Ti_402.3710   | 6.338  | 0.4332 | 1944.6  | 1945.09 | 8660.2  | 1    | 2538.7 | 80   | 1  | R.FDQLFDDSDPFEVLK.A                                                         |

|                 |                          |        |        |         |         |         |     |        |      |    |                                                                |
|-----------------|--------------------------|--------|--------|---------|---------|---------|-----|--------|------|----|----------------------------------------------------------------|
|                 | Hs293FLP_TREX_Ti_102.0   | 3.6106 | 0.3335 | 1460.72 | 1461.53 | 10064.2 | 1   | 1057.2 | 56.7 | 1  | K.SAAQAAAQTNSNAAGK.Q                                           |
|                 | HsGST-MOCK_Ti_103.118    | 3.1142 | 0.1515 | 1368.11 | 1368.62 | 5680.5  | 4   | 635.9  | 68.2 | 2  | K.KEETQPPVALKK.E                                               |
|                 | HsGST-MOCK_Ti_105.151    | 4.9824 | 0.3926 | 2243.03 | 2243.4  | 9109.7  | 1   | 1648   | 40   | 1  | K.RGGSGSHNWGTVKDELTESPK.Y                                      |
|                 | HsGST-MOCK_Ti_103.139    | 4.7432 | 0.4888 | 2112.62 | 2113.23 | 7324.6  | 1   | 1419.5 | 61.8 | 1  | K.SKSEEHAHAEDSVMDHFR.K                                         |
| gi 21361331 ref |                          | 17     | 36     | 0.202   | 1500    | 164939  | 6.7 | U      |      |    | carbamoyl-phosphate synthetase 1, mitochondrial [Homo sapiens] |
| *               | HsHeLa_Control-MG_Ti_20  | 4.273  | 0.4568 | 1383.56 | 1383.54 | 8473.1  | 1   | 2237.4 | 83.3 | 2  | K.AQTAHIVLEDGTK.M                                              |
| *               | HsHeLa_Control-MG_Ti_20  | 5.9432 | 0.4194 | 3387.66 | 3389.7  | 6765.5  | 1   | 1000.9 | 29.7 | 2  | K.GYSFGHPSSVAGEVFNGLGGYPEAITDPAYK.G                            |
| *               | HsHeLa_Control-MG_Ti_20  | 3.9202 | 0.3576 | 1734.36 | 1734.9  | 5872    | 1   | 1176.6 | 75   | 1  | K.IEFEGQPVDVDPNK.Q                                             |
| *               | HsHeLa_Control-MG_Ti_20  | 3.119  | 0.2252 | 1750.54 | 1750.95 | 5685.2  | 1   | 792    | 60.7 | 1  | R.GAEVHLVPWNHDFTK.M                                            |
| *               | HsHeLa_Control-MG_Ti_20  | 4.31   | 0.3405 | 1933.21 | 1931.24 | 6368.4  | 1   | 1296.7 | 63.2 | 4  | K.EPLFGISTGNLITGLAAGAK.T                                       |
| *               | HsHeLa_Control-MG_Ti_20  | 2.9887 | 0.2276 | 1726.41 | 1726.07 | 4606.4  | 1   | 448.8  | 53.1 | 1  | K.ATTITSVLPKALVASR.V                                           |
| *               | HsHeLa_Control-MG_Ti_20  | 3.7666 | 0.3144 | 2309.03 | 2310.7  | 3607.2  | 1   | 407.6  | 50   | 3  | K.QADTVYFLPITPQFVTEVIK.A                                       |
| *               | HsHeLa_Control-MG_Ti_20  | 5.1565 | 0.4141 | 1591.66 | 1590.81 | 4881.3  | 1   | 1180.6 | 78.6 | 5  | K.IAPSFAVESIEDALK.A                                            |
| *               | HsHeLa_Control-MG_Ti_20  | 3.261  | 0.3118 | 1595.4  | 1593.75 | 9902.9  | 1   | 854.3  | 50   | 1  | R.SAYALGGLGSGICPNR.E                                           |
| *               | HsHeLa_Control-MG_Ti_20  | 4.5182 | 0.2411 | 3414.84 | 3414.86 | 4516    | 1   | 417.9  | 25.8 | 1  | R.ILDIYHQEACGGCIISVGGQIPNNLAVPLYK.N                            |
| *               | HsHeLa_Control-MG_Ti_20  | 3.8557 | 0.2549 | 1223.23 | 1222.42 | 5572.6  | 1   | 1337.1 | 85   | 2  | R.SIFSAVLDELK.V                                                |
| *               | HsHeLa_Control-MG_Ti_20  | 4.5636 | 0.3582 | 1639.3  | 1638.95 | 5930    | 1   | 1413.1 | 78.6 | 4  | K.AFAISGPFNVQFLVK.G                                            |
| *               | HsHeLa_Control-MG_Ti_20  | 3.4739 | 0.3081 | 1279.38 | 1279.48 | 5475.2  | 1   | 1281.1 | 86.4 | 2  | K.TLGVDFIDVATK.V                                               |
| *               | HsHeLa_Control-MG_Ti_20  | 4.1146 | 0.4872 | 2013.69 | 2014.38 | 6285.6  | 1   | 817.5  | 58.8 | 2  | K.HLPTLDHPHPIADYVAIK.A                                         |
| *               | HsHeLa_Control-MG_Ti_20  | 3.8312 | 0.3361 | 2414.33 | 2416.64 | 7322.1  | 1   | 1136.9 | 52.4 | 2  | R.CEMASTGEVACFGEIHTAFLK.A                                      |
| *               | HsHeLa_Control-MG_Ti_10  | 4.1549 | 0.3069 | 1590.23 | 1589.79 | 6777.5  | 1   | 1380.7 | 76.9 | 2  | R.FLGVAEQLHNEGFK.L                                             |
| *               | HsHeLa_Control-MG_Ti_20  | 4.1361 | 0.1782 | 1728.17 | 1727.91 | 5844.7  | 1   | 763.7  | 60   | 1  | R.DGSIDLVINLPNNNTK.F                                           |
| gi 34419635 ref |                          | 33     | 234    | 0.202   | 643     | 71028   | 6.1 | U      |      |    | heat shock 70kDa protein 6 (HSP70B') [Homo sapiens]            |
|                 | HsF-IP-293-MG_Ti_102.17  | 2.6315 | 0.2566 | 1487.66 | 1488.59 | 3419.2  | 1   | 176.5  | 58.3 | 2  | R.TTPSYVAFTDTER.L                                              |
|                 | HsFLAG-Control_HeLa_NE   | 3.2444 | 0.2808 | 1487.89 | 1488.59 | 4634.5  | 1   | 570.4  | 66.7 | 57 | R.TTPSYVAFTDTER.L                                              |
|                 | Hs293FLP-MG_Ti_202.217   | 3.2886 | 0.3043 | 1487.89 | 1488.59 | 4372.6  | 1   | 860.7  | 83.3 | 12 | R.TTPSYVAFTDTER.L                                              |
|                 | HsHeLa_Control-MG_Ti_20  | 2.4813 | 0.2055 | 1488.47 | 1488.59 | 3249.8  | 1   | 121.1  | 50   | 1  | R.TTPSYVAFTDTER.L                                              |
|                 | HsHeLa_Control-MG_Ti_20  | 3.6044 | 0.4296 | 1489.1  | 1488.59 | 3675.9  | 1   | 589.8  | 75   | 9  | R.TTPSYVAFTDTER.L                                              |
|                 | HsFLAG-Control_MG_293_   | 4.0254 | 0.3882 | 1613.23 | 1613.77 | 5127    | 1   | 1241.4 | 78.6 | 2  | K.SQAALNPHNTVFDK.R                                             |
| *               | HsFLAG-Control_MG_293_   | 4.0742 | 0.2754 | 1169.65 | 1170.35 | 6353.2  | 1   | 2020.7 | 90.9 | 4  | K.DAGAIAGLNVL.R                                                |
|                 | Hs293FLP-MG_Ti_202.294   | 4.8775 | 0.4462 | 1687.76 | 1688.92 | 5341.9  | 1   | 1731.2 | 83.3 | 3  | R.IINEPTAAAIAIYGLDR.R                                          |
|                 | HsGST-MOCK_Ti_303.271    | 5.3019 | 0.4188 | 1687.89 | 1688.92 | 6005.7  | 1   | 1770   | 80   | 5  | R.IINEPTAAAIAIYGLDR.R                                          |
|                 | HsFLAG-Control_293_Ti_2( | 4.1753 | 0.1988 | 1687.96 | 1688.92 | 6399    | 1   | 1885.4 | 51.7 | 1  | R.IINEPTAAAIAIYGLDR.R                                          |
|                 | HsFLAG-Control_HeLa_S1(  | 4.903  | 0.4088 | 1688.25 | 1688.92 | 7186.8  | 1   | 1733   | 73.3 | 10 | R.IINEPTAAAIAIYGLDR.R                                          |
|                 | HsFLAG-Control_HeLa_S1(  | 3.9936 | 0.1641 | 1688.33 | 1688.92 | 7417.7  | 1   | 1534   | 45   | 1  | R.IINEPTAAAIAIYGLDR.R                                          |
|                 | HsFLAG-Control_HeLa_S1(  | 5.0183 | 0.3954 | 1688.36 | 1688.92 | 5572.8  | 1   | 1466.9 | 76.7 | 6  | R.IINEPTAAAIAIYGLDR.R                                          |
|                 | Hs283FLP_Ti_102.2353.23  | 3.8797 | 0.1309 | 1688.68 | 1688.92 | 7756.8  | 2   | 1564.1 | 46.7 | 1  | R.IINEPTAAAIAIYGLDR.R                                          |
|                 | HsFLAG-Control_HeLa_NE   | 4.519  | 0.1849 | 1688.87 | 1688.92 | 8251.2  | 1   | 1695   | 48.3 | 2  | R.IINEPTAAAIAIYGLDR.R                                          |
|                 | Hs293FLP_Ti_302.2512.25  | 5.4892 | 0.4056 | 1689.01 | 1688.92 | 4983.8  | 1   | 1547.6 | 80   | 6  | R.IINEPTAAAIAIYGLDR.R                                          |
|                 | HsF-IP-293-MG_Ti_102.22  | 4.8927 | 0.3179 | 1689.03 | 1688.92 | 5477.4  | 1   | 1448.1 | 76.7 | 2  | R.IINEPTAAAIAIYGLDR.R                                          |
|                 | HsF-IP-293-MG_Ti_102.23  | 4.2375 | 0.1806 | 1689.14 | 1688.92 | 8011.1  | 1   | 1686.5 | 46.7 | 1  | R.IINEPTAAAIAIYGLDR.R                                          |
|                 | Hs293FLP-MG_Ti_202.294   | 5.0798 | 0.1684 | 1689.4  | 1688.92 | 8497.4  | 1   | 2183.9 | 51.7 | 2  | R.IINEPTAAAIAIYGLDR.R                                          |
|                 | HsFLAG-Control_HeLa_S1(  | 3.5964 | 0.1281 | 1689.42 | 1688.92 | 8134.2  | 1   | 1438.2 | 45   | 1  | R.IINEPTAAAIAIYGLDR.R                                          |
|                 | HsFLAG-Control_HeLa_NE   | 5.5152 | 0.4246 | 1689.75 | 1688.92 | 5197.5  | 1   | 1487.3 | 76.7 | 18 | R.IINEPTAAAIAIYGLDR.R                                          |
|                 | HsHeLa_Control-MG_Ti_10  | 5.0746 | 0.318  | 1689.79 | 1688.92 | 5333.8  | 1   | 1131.8 | 70   | 9  | R.IINEPTAAAIAIYGLDR.R                                          |
|                 | HsFLAG-Control_293_Ti_2( | 4.5503 | 0.4103 | 1677.37 | 1676.7  | 7130.1  | 1   | 1456.7 | 70   | 19 | K.ATAGDTHLGGEDFDNR.L                                           |
|                 | HsGST-MOCK_Ti_404.277    | 3.9207 | 0.2533 | 1543.5  | 1543.69 | 5188.1  | 1   | 843.1  | 72.7 | 4  | R.ARFEELCSDFR.S                                                |
|                 | HsGST-MOCK_Ti_102.200    | 3.7463 | 0.1191 | 1543.86 | 1543.69 | 7015    | 1   | 1515   | 52.3 | 1  | R.ARFEELCSDFR.S                                                |
|                 | Hs293FLP_Ti_303.2415.24  | 4.2742 | 0.302  | 1545.2  | 1543.69 | 4892.3  | 1   | 1270.4 | 86.4 | 21 | R.ARFEELCSDFR.S                                                |

|                    |                          |        |        |         |         |         |   |                                                                     |      |    |                                          |
|--------------------|--------------------------|--------|--------|---------|---------|---------|---|---------------------------------------------------------------------|------|----|------------------------------------------|
|                    | HsFLAG-Control_HeLa_S10  | 3.4883 | 0.2705 | 1316.29 | 1316.42 | 7134.9  | 5 | 1058.9                                                              | 77.8 | 8  | R.FEELCSDLFR.S                           |
|                    | HsFLAG-Control_HeLa_NE   | 2.0048 | 0.1567 | 902.47  | 903.02  | 4539.8  | 5 | 443.3                                                               | 71.4 | 4  | R.STLEPVEK.A                             |
|                    | HsFLAG-Control_MG_293_   | 3.1449 | 0.1938 | 1082.22 | 1082.24 | 5278.9  | 5 | 835.3                                                               | 87.5 | 7  | K.LLQDFFNGK.E                            |
|                    | HsFLAG-MOCK_300mM_T      | 3.5405 | 0.2578 | 1568.26 | 1566.8  | 8502.8  | 1 | 1323.3                                                              | 75   | 1  | K.LLQDFFNGKELNK.S                        |
|                    | HsFLAG-Control_MG_293_   | 2.37   | 0.1055 | 1183.56 | 1184.38 | 4415.4  | 2 | 447.5                                                               | 65   | 2  | R.FELSGIPPAPR.G                          |
|                    | HsFLAG-Control_MG_293_   | 3.253  | 0.2405 | 1184.35 | 1184.38 | 3642.9  | 1 | 911.3                                                               | 80   | 11 | R.FELSGIPPAPR.G                          |
|                    | HsFLAG-Control_MG_293_   | 2.8795 | 0.2759 | 1457.63 | 1457.53 | 8283.2  | 1 | 706.6                                                               | 53.8 | 1  | R.QGDPSTGPIIEVD.-                        |
| gij 13654237 ref N | 52                       | 122    | 0.201  | 4128    | 469093  | 7.1     | U | protein kinase, DNA-activated, catalytic polypeptide [Homo sapiens] |      |    |                                          |
|                    | HsFLAG-Control_293_Ti_10 | 4.1025 | 0.3982 | 2620.81 | 2620.97 | 8093.6  | 1 | 734.3                                                               | 39.6 | 4  | R.GLGQECVLSSSPAVLALQTSVFSR.D             |
| *                  | HsFLAG-Control_293_Ti_10 | 2.1132 | 0.1403 | 970.4   | 971.194 | 7312.6  | 1 | 826.6                                                               | 75   | 1  | K.LPVLAGCLK.G                            |
| *                  | HsFLAG-Control_293_Ti_10 | 2.7859 | 0.1552 | 971.39  | 971.194 | 4972.2  | 4 | 1022.5                                                              | 81.2 | 1  | K.LPVLAGCLK.G                            |
| *                  | HsFLAG-Control_293_Ti_20 | 2.2131 | 0.1914 | 972.08  | 971.194 | 6546.6  | 1 | 717.5                                                               | 75   | 2  | K.LPVLAGCLK.G                            |
|                    | HsHeLa3_Ti_104.2845.284  | 3.4697 | 0.3397 | 1240.83 | 1240.41 | 4478    | 1 | 749.5                                                               | 80   | 1  | K.GLSLLCNFTK.S                           |
|                    | HsHeLa3_Ti_103.3232.323  | 3.4894 | 0.2767 | 1151.28 | 1150.36 | 6891.4  | 1 | 1430.4                                                              | 80   | 1  | K.AALSALESFLK.Q                          |
|                    | HsHeLa_Control-MG_Ti_20  | 3.4787 | 0.2784 | 1497.87 | 1497.7  | 9752    | 5 | 755.6                                                               | 58.3 | 2  | R.NCISTVVHQGLIR.I                        |
|                    | HsFLAG-Control_293_Ti_20 | 3.6929 | 0.2242 | 1576.24 | 1575.72 | 9065.4  | 1 | 961.7                                                               | 61.5 | 2  | K.NLSSNEAISLEEIR.I                       |
|                    | HsFLAG-Control_MG_293_   | 4.7414 | 0.3429 | 1443.73 | 1444.73 | 7832.2  | 1 | 2205.6                                                              | 84.6 | 11 | R.VVQMLGSLGGQINK.N                       |
|                    | HsHeLa3_Ti_106.3187.318  | 3.9772 | 0.4159 | 1317.47 | 1316.63 | 6966.3  | 1 | 1509.8                                                              | 85   | 1  | K.PVIFLDVFLPR.V                          |
|                    | HsFLAG-Control_293_Ti_10 | 3.502  | 0.3672 | 1177.05 | 1177.27 | 7630.5  | 1 | 1692.2                                                              | 94.4 | 1  | R.LACDQVTR.Q                             |
|                    | Hs293FLP-MG_Ti_206.036   | 2.5996 | 0.1291 | 2274.01 | 2275.67 | 9324.3  | 2 | 405.1                                                               | 38.2 | 1  | R.QLYEPLVMQLIHWFNNK.K                    |
| *                  | HsFLAG-Control_293_Ti_10 | 4.2052 | 0.4162 | 2945.35 | 2946.33 | 8376.3  | 1 | 1090.8                                                              | 44.2 | 1  | K.KFESQDVALLEAILDGIVDPVDSTLR.D           |
|                    | HsHeLa3_Ti_104.2277.227  | 2.5135 | 0.1518 | 1340.59 | 1339.54 | 5790.3  | 5 | 559.5                                                               | 63.6 | 1  | R.LGASLAFNNIYR.E                         |
|                    | HsHeLa_Control-MG_Ti_20  | 4.1308 | 0.3038 | 3881.13 | 3881.38 | 10987.6 | 1 | 808.6                                                               | 21.4 | 1  | K.DVLKEEGVSLINTFEGGGCGQPSGILAQPTLLYL.R.G |
|                    | HsHeLa3_Ti_103.3043.304  | 4.9432 | 0.464  | 1817.23 | 1816.11 | 5348.7  | 1 | 945.1                                                               | 64.7 | 9  | R.TVGALQVLGTEAQSSLLK.A                   |
|                    | HsGST-MOCK_Ti_405.461    | 3.9577 | 0.4637 | 2075.42 | 2077.45 | 10891.3 | 1 | 546.3                                                               | 38.9 | 4  | K.AVAFFLESIAMHDIIAEK.C                   |
|                    | Hs293FLP-MG_Ti_202.339   | 4.1709 | 0.2788 | 2564.82 | 2563.79 | 8715.1  | 1 | 926.5                                                               | 43.2 | 3  | K.ITAQSIEELCAVNLYGPDQVDR.S               |
|                    | HsGST-MOCK_Ti_106.258    | 3.6844 | 0.2005 | 3145.03 | 3144.6  | 9761.7  | 1 | 1021.7                                                              | 26.8 | 1  | R.AGLLHNILPSQSTDLHHSVGTLLSLVYK.G         |
|                    | HsHeLa3_Ti_106.2587.258  | 2.7438 | 0.3035 | 1769.86 | 1769.12 | 6736.9  | 1 | 590.1                                                               | 46.4 | 1  | R.VLEQLIVAHFPMQSR.E                      |
|                    | HsHeLa3_Ti_105.0183.018  | 3.5405 | 0.1139 | 2712.72 | 2710.18 | 8143.1  | 1 | 1045.5                                                              | 31.8 | 1  | K.FLDALELSQSPMLLEMTVELCR.E               |
|                    | HsFLAG-Control_MG_293_   | 4.7715 | 0.4663 | 2048.58 | 2048.23 | 6917.1  | 1 | 1012.4                                                              | 58.8 | 7  | K.INQVFHGSCITEGNELTK.T                   |
|                    | HsGST-MOCK_Ti_405.261    | 3.767  | 0.3536 | 1620.47 | 1620.85 | 9165    | 1 | 1087.9                                                              | 66.7 | 2  | K.FYQGFLEKPEK.N                          |
|                    | HsHeLa3_Ti_104.4096.409  | 4.113  | 0.1818 | 1445.7  | 1445.74 | 5008.4  | 1 | 1452.5                                                              | 86.4 | 2  | K.NLLIFENLIDLK.R                         |
|                    | HsHeLa3_Ti_103.2700.270  | 3.2755 | 0.3281 | 1610.26 | 1609.84 | 6289    | 1 | 723.9                                                               | 62.5 | 1  | R.YNFPVEVEVPMER.K                        |
|                    | HsHeLa3_Ti_103.1531.153  | 3.0746 | 0.4023 | 1468.85 | 1468.56 | 5223.3  | 1 | 859                                                                 | 73.1 | 3  | R.SLGPPQGEEDSVPR.D                       |
|                    | HsFLAG-Control_293_Ti_10 | 2.7964 | 0.2496 | 1206.02 | 1206.47 | 5280.4  | 1 | 773.8                                                               | 75   | 2  | K.LGNPIVPLNIR.L                          |
|                    | HsHeLa3_Ti_105.2328.232  | 2.8598 | 0.2438 | 1679.08 | 1679.96 | 9457    | 3 | 729.8                                                               | 53.8 | 1  | K.LVINTEEVFRPYAK.H                       |
|                    | HsHeLa3_Ti_103.3480.348  | 4.1041 | 0.3019 | 1519.03 | 1518.71 | 6128.5  | 1 | 1582.7                                                              | 83.3 | 2  | K.NILEESLCELVAK.Q                        |
|                    | HsGST-MOCK_Ti_405.313    | 3.3821 | 0.2384 | 2085.88 | 2086.32 | 7656.6  | 2 | 374.3                                                               | 38.2 | 1  | R.ELLNPFVESHVSTTCR.E                     |
|                    | HsFLAG-Control_293_Ti_10 | 4.8425 | 0.3215 | 2121.4  | 2120.5  | 8927    | 1 | 1749.4                                                              | 63.9 | 4  | K.DVLIQGLIDENPGLQLIIR.N                  |
|                    | HsFLAG-Control_MG_293_   | 3.5782 | 0.1871 | 1218.7  | 1219.47 | 6476.9  | 1 | 1055.2                                                              | 80   | 2  | R.LLALNSLYSPK.I                          |
|                    | HsHeLa3_Ti_103.2587.258  | 4.3484 | 0.3929 | 2297.06 | 2296.6  | 6795.5  | 1 | 864.5                                                               | 50   | 1  | R.STVLTMPFVETQASQGTQTR.T                 |
|                    | HsFLAG-Control_293_Ti_20 | 3.4641 | 0.2916 | 1136.05 | 1136.29 | 8789.8  | 1 | 1248.6                                                              | 83.3 | 1  | R.HGDLDPDIQI.H                           |
|                    | HsGST-MOCK_Ti_104.204    | 2.9316 | 0.2539 | 2159.73 | 2159.54 | 5223.6  | 7 | 301.3                                                               | 36.8 | 1  | K.HSSLITPLQAVAQRDPPIAK.Q                 |
|                    | HsGST-MOCK_Ti_104.203    | 3.631  | 0.2803 | 2159.84 | 2159.54 | 6624.6  | 1 | 1050.1                                                              | 36.8 | 1  | K.HSSLITPLQAVAQRDPPIAK.Q                 |
|                    | HsHeLa3_Ti_105.3771.377  | 3.4924 | 0.2966 | 1340.66 | 1340.61 | 4079    | 1 | 640.4                                                               | 77.3 | 3  | K.QLFSSLFSGILK.E                         |
|                    | HsFLAG-Control_293_Ti_20 | 1.9429 | 0.1407 | 951.43  | 952.182 | 5040    | 4 | 582.6                                                               | 75   | 1  | R.LLPAELPAK.R                            |
|                    | HsFLAG-Control_293_Ti_10 | 3.0489 | 0.2561 | 2299.4  | 2298.48 | 5060.4  | 5 | 303                                                                 | 44.1 | 1  | K.DFWELASLDCYNHLEWK.S                    |
|                    | HsHeLa3_Ti_103.3747.374  | 2.9151 | 0.0953 | 2238.73 | 2237.58 | 7309.3  | 2 | 701                                                                 | 50   | 1  | K.IWSEPFYQETYLPMIR.S                     |

|                   |                          |        |        |         |         |         |   |        |      |   |                                                                  |
|-------------------|--------------------------|--------|--------|---------|---------|---------|---|--------|------|---|------------------------------------------------------------------|
|                   | HsGST-MOCK_Ti_302.392    | 5.1482 | 0.4262 | 1904.41 | 1905.2  | 9603.5  | 1 | 2985.4 | 78.1 | 6 | K.LLLQGEADQSLTTFIDK.A                                            |
| *                 | HsFLAG-Control_293_Ti_10 | 5.2701 | 0.4395 | 2181.91 | 2182.52 | 9211.5  | 1 | 2616   | 69.4 | 9 | K.LQSVQALTEIQEFISFISK.Q                                          |
|                   | HsHeLa3_Ti_102.2659.266  | 2.6302 | 0.1714 | 1770.14 | 1769.95 | 3670.9  | 3 | 299    | 50   | 1 | K.TVSLLDENNVSSYLSK.N                                             |
|                   | Hs293FLP-MG_Ti_202.308   | 4.1735 | 0.4413 | 2173.55 | 2174.38 | 5438.6  | 1 | 771.8  | 55.3 | 6 | R.IANALSSEPACLAIEEDK.A                                           |
|                   | HsGST-MOCK_Ti_405.359    | 3.3844 | 0.2706 | 2180.3  | 2178.59 | 10326.5 | 1 | 838.1  | 50   | 1 | R.LLQIERYPEETLSLMTK.E                                            |
|                   | HsFLAG-Control_293_Ti_10 | 3.6633 | 0.2795 | 3976.29 | 3977.37 | 9350.4  | 1 | 540.8  | 19.1 | 1 | K.DQAVAVQHSVEEITDNYPQAIVYPFIISSSESYSFK.D                         |
|                   | HsFLAG-Control_293_Ti_10 | 4.1278 | 0.2877 | 3002.5  | 3004.41 | 11045.4 | 1 | 1174   | 27.9 | 3 | K.SKLDQGGVIQDFINALDQLSNPELLFK.D                                  |
|                   | HsHeLa3_Ti_103.3803.380  | 3.5816 | 0.2067 | 1639.77 | 1637.93 | 5589.9  | 2 | 733.3  | 61.5 | 2 | K.LSDFNDITNMLLLK.M                                               |
| *                 | HsHeLa3_Ti_103.3707.370  | 2.5412 | 0.2549 | 2394.72 | 2395.66 | 6747.1  | 1 | 359.3  | 37.5 | 1 | R.VEQLFQVMNGILAQDSACSQR.A                                        |
| *                 | HsHeLa3_Ti_104.4719.471  | 4.3303 | 0.3091 | 1629.63 | 1629.94 | 7099.7  | 1 | 1725.7 | 80.8 | 2 | R.LGLIEWLENTVTLK.D                                               |
| *                 | HsFLAG-Control_293_Ti_20 | 2.6878 | 0.2475 | 1420.85 | 1421.61 | 10444.3 | 6 | 877.1  | 63.6 | 1 | K.DLLLNTMSQEEK.A                                                 |
|                   | HsFLAG-Control_293_Ti_10 | 3.5291 | 0.2914 | 1632.53 | 1632.72 | 4662.4  | 1 | 773.9  | 71.4 | 2 | R.AQEPESGLSEETQVK.C                                              |
| gi 27734703 ref   |                          | 4      | 4      | 0.2     | 330     | 37221   |   |        |      |   | hypothetical protein LOC283742 [Homo sapiens]                    |
| *                 | HsHeLa3_Ti_103.1770.177  | 2.8812 | 0.2804 | 1199.55 | 1199.39 | 5723.2  | 1 | 956.4  | 80   | 1 | K.GPLLEEALTK.A                                                   |
| *                 | HsHeLa3_Ti_103.4160.416  | 3.0448 | 0.3136 | 2480.4  | 2480.74 | 6277.4  | 1 | 536.5  | 38.6 | 1 | K.AAEGGLSSPEFSELCIWLGSQIK.S                                      |
| *                 | HsHeLa3_Ti_103.4460.446  | 4.6366 | 0.3214 | 2172.71 | 2170.44 | 6518.5  | 1 | 1017.1 | 55.6 | 1 | K.NSEVYQEVQAMFDTLGIPIK.S                                         |
| *                 | HsHeLa3_Ti_102.1723.172  | 3.0457 | 0.3044 | 1565.62 | 1563.68 | 8152.7  | 1 | 1159.9 | 70.8 | 1 | K.MDLNSEQAEQLER.I                                                |
| gi 10800138 ref   |                          | 3      | 9      | 0.198   | 126     | 13936   |   |        |      |   | H2B histone family, member B [Homo sapiens]                      |
| gi 66912162 ref   |                          | 3      | 9      | 0.198   | 126     | 13920   |   |        |      |   | histone 2, H2bf [Homo sapiens]                                   |
| gi 4504271 ref Nf |                          | 3      | 9      | 0.198   | 126     | 13906   |   |        |      |   | H2B histone family, member K [Homo sapiens]                      |
| gi 4504269 ref Nf |                          | 3      | 9      | 0.198   | 126     | 13892   |   |        |      |   | H2B histone family, member J [Homo sapiens]                      |
| gi 4504265 ref Nf |                          | 3      | 9      | 0.198   | 126     | 13906   |   |        |      |   | H2B histone family, member G [Homo sapiens]                      |
| gi 4504263 ref Nf |                          | 3      | 9      | 0.198   | 126     | 13989   |   |        |      |   | H2B histone family, member E [Homo sapiens]                      |
| gi 4504261 ref Nf |                          | 3      | 9      | 0.198   | 126     | 13922   |   |        |      |   | H2B histone family, member D [Homo sapiens]                      |
| gi 4504259 ref Nf |                          | 3      | 9      | 0.198   | 126     | 13952   |   |        |      |   | H2B histone family, member C [Homo sapiens]                      |
| gi 4504257 ref Nf |                          | 3      | 9      | 0.198   | 126     | 13906   |   |        |      |   | H2B histone family, member A [Homo sapiens]                      |
| gi 21396484 ref   |                          | 3      | 9      | 0.198   | 126     | 13906   |   |        |      |   | H2B histone family, member H [Homo sapiens]                      |
| gi 21166389 ref   |                          | 3      | 9      | 0.198   | 126     | 13906   |   |        |      |   | H2B histone family, member L [Homo sapiens]                      |
| gi 20336752 ref   |                          | 3      | 9      | 0.198   | 126     | 13936   |   |        |      |   | H2B histone family, member B [Homo sapiens]                      |
| gi 18105048 ref   |                          | 3      | 9      | 0.198   | 126     | 13890   |   |        |      |   | H2B histone family, member T [Homo sapiens]                      |
| gi 11036646 ref   |                          | 3      | 9      | 0.198   | 126     | 13944   |   |        |      |   | H2B histone family, member S [Homo sapiens]                      |
|                   | Hs293FLP-MG_Ti_105.159   | 2.3675 | 0.2884 | 1265.5  | 1266.44 | 5744.3  | 1 | 525.4  | 61.1 | 1 | R.KESYSVYVYK.V                                                   |
|                   | Hs293FLP-MG_Ti_105.156   | 3.659  | 0.2277 | 1267.24 | 1266.44 | 4674.6  | 1 | 868.1  | 83.3 | 4 | R.KESYSVYVYK.V                                                   |
|                   | HsFlag1P_Ti_105.3933.393 | 4.8638 | 0.5024 | 1743.99 | 1745.02 | 10137.7 | 1 | 2353.4 | 75   | 4 | K.AMGIMNSFVNDIFER.I                                              |
| gi 10835230 ref   |                          | 1      | 3      | 0.197   | 61      | 6070    |   |        |      |   | metallothionein 1G [Homo sapiens]                                |
| gi 88974819 ref X |                          | 1      | 3      | 0.067   | 178     | 18903   |   |        |      |   | PREDICTED: hypothetical protein XP_498969 [Homo sapiens]         |
| gi 5174764 ref Nf |                          | 1      | 3      | 0.197   | 61      | 6042    |   |        |      |   | metallothionein 2A [Homo sapiens]                                |
| gi 28866966 ref   |                          | 1      | 3      | 0.197   | 61      | 6137    |   |        |      |   | metallothionein 1M [Homo sapiens]                                |
| gi 10835232 ref   |                          | 1      | 3      | 0.197   | 61      | 6068    |   |        |      |   | metallothionein 1X [Homo sapiens]                                |
|                   | HsFLAG-MOCK_150mM_T      | 3.9348 | 0.4427 | 1446.47 | 1446.43 | 9073    | 1 | 1586   | 81.8 | 3 | K.SCCSCCPVGCAC.C                                                 |
| gi 35493811 ref   |                          | 11     | 55     | 0.196   | 530     | 59380   |   |        |      |   | RNA-binding region containing protein 2 isoform a [Homo sapiens] |
| gi 4757926 ref Nf |                          | 11     | 55     | 0.198   | 524     | 58657   |   |        |      |   | RNA-binding region containing protein 2 isoform b [Homo sapiens] |
| gi 35493829 ref   |                          | 11     | 55     | 0.279   | 373     | 40541   |   |        |      |   | RNA-binding region containing protein 2 isoform c [Homo sapiens] |
| gi 35493822 ref   |                          | 11     | 55     | 0.283   | 367     | 39818   |   |        |      |   | RNA-binding region containing protein 2 isoform d [Homo sapiens] |
| gi 35493817 ref   |                          | 11     | 55     | 0.279   | 373     | 40541   |   |        |      |   | RNA-binding region containing protein 2 isoform c [Homo sapiens] |
|                   | HsHeLa_Control_Ti_102.31 | 3.0608 | 0.0842 | 1272.35 | 1272.4  | 5737.4  | 1 | 1062   | 80   | 2 | R.DLEEFFSTVGK.V                                                  |
|                   | HsFLAG-Control_HeLa_NE   | 3.6188 | 0.3643 | 2391.66 | 2392.76 | 6035.3  | 1 | 556.6  | 43.2 | 3 | K.GIAYVEFVDVSSVPLAIGLTGQR.V                                      |
|                   | HsFLAG-Control_HeLa_NE   | 4.5568 | 0.4319 | 2392.66 | 2392.76 | 9161.6  | 1 | 1251.9 | 33   | 2 | K.GIAYVEFVDVSSVPLAIGLTGQR.V                                      |
|                   | HsHeLa3_Ti_104.2473.247  | 2.3954 | 0.4214 | 1551.68 | 1552.86 | 7863.6  | 1 | 777.1  | 57.1 | 1 | R.VLGVPIIQASQAEK.N                                               |

|                   |                          |        |        |         |         |         |   |                                                                                 |      |    |                                     |
|-------------------|--------------------------|--------|--------|---------|---------|---------|---|---------------------------------------------------------------------------------|------|----|-------------------------------------|
|                   | HsFLAG-Control_HeLa_NE   | 3.2534 | 0.2862 | 1552.81 | 1552.86 | 7033    | 1 | 737.5                                                                           | 57.1 | 2  | R.VLGVPIIVQASQAQEK.N                |
|                   | Hs293FLP-MG_Ti_203.276   | 4.365  | 0.3913 | 1553.59 | 1552.86 | 3284.7  | 1 | 668.7                                                                           | 75   | 22 | R.VLGVPIIVQASQAQEK.N                |
|                   | HsHeLa3_Ti_104.2463.246  | 4.144  | 0.3784 | 1553.79 | 1552.86 | 3060.7  | 1 | 760.5                                                                           | 82.1 | 2  | R.VLGVPIIVQASQAQEK.N                |
|                   | HsFLAG-Control_HeLa_NE   | 4.9435 | 0.4651 | 1829.7  | 1830.86 | 7134.8  | 1 | 1364.2                                                                          | 65.6 | 17 | R.TDASSASSFLDSDELER.T               |
|                   | HsFLAG-Control_HeLa_NE   | 3.3244 | 0.1326 | 991.23  | 991.089 | 6104.5  | 1 | 1177.4                                                                          | 88.9 | 2  | R.TGIDLGTTR.L                       |
|                   | HsGST-MOCK_Ti_105.147    | 3.3066 | 0.439  | 1238.54 | 1238.43 | 9798.2  | 1 | 1485.6                                                                          | 80   | 1  | K.HGGVIHIYVDK.N                     |
|                   | HsHeLa_Control_Ti_106.34 | 2.6017 | 0.3543 | 1693.27 | 1692.93 | 5444.2  | 1 | 563.2                                                                           | 50   | 1  | K.CPSIAAAIAAVNALHGR.W               |
| gi 4826734 ref NF |                          | 8      | 0.196  | 526     | 53426   | 9.4     | U | fusion (involved in t(12;16) in malignant liposarcoma) isoform a [Homo sapiens] |      |    |                                     |
| *                 | HsFLAG-Control_HeLa_NE   | 6.9768 | 0.4157 | 3587.24 | 3587.75 | 10060   | 1 | 2365                                                                            | 33.1 | 9  | R.HDSEQDNSDNTIFVQGLGENVTIESVADYFK.Q |
| *                 | HsFLAG-Control_HeLa_NE   | 3.7472 | 0.3555 | 1664    | 1662.84 | 4078.6  | 1 | 929.7                                                                           | 66.7 | 2  | K.LKGEATVSFDDPPSAK.A                |
|                   | HsFLAG-Control_HeLa_S10  | 3.1093 | 0.3568 | 1420.76 | 1421.5  | 8011.9  | 1 | 1098.8                                                                          | 65.4 | 3  | K.GEATVSFDDPPSAK.A                  |
|                   | HsFLAG-Control_HeLa_NE   | 2.937  | 0.2157 | 1023.19 | 1023.13 | 5824.6  | 1 | 1015.2                                                                          | 87.5 | 4  | K.AAIDWFDGK.E                       |
| *                 | HsFLAG-MOCK_300mM_T      | 2.8818 | 0.288  | 1896.47 | 1896.11 | 5992.6  | 1 | 817.2                                                                           | 59.4 | 1  | K.AAIDWFDGKEFSGNPIK.V               |
| *                 | HsGST-MOCK_Ti_404.234    | 3.388  | 0.4386 | 1814.01 | 1813.91 | 7582.7  | 1 | 727.6                                                                           | 61.5 | 2  | K.CPNPTCENMNFVSWR.N                 |
| *                 | HsGST-MOCK_Ti_104.128    | 4.6709 | 0.513  | 2253.41 | 2254.36 | 5051.1  | 1 | 1442.2                                                                          | 67.4 | 2  | K.APKPDGPGGGPGGSHMGGNYGDDR.R        |
| *                 | HsGST-MOCK_Ti_104.128    | 3.6633 | 0.3522 | 2255.6  | 2254.36 | 5519.2  | 1 | 1011.7                                                                          | 38   | 1  | K.APKPDGPGGGPGGSHMGGNYGDDR.R        |
| gi 4506761 ref NF |                          | 2      | 0.196  | 97      | 11203   | 7.4     | U | S100 calcium-binding protein A10 [Homo sapiens]                                 |      |    |                                     |
| *                 | HsFLAG-MOCK_300mM_T      | 2.6719 | 0.2594 | 1095.61 | 1095.24 | 3415    | 4 | 619.3                                                                           | 81.2 | 1  | K.GYLTKEDLR.V                       |
| *                 | HsGST-MOCK_Ti_403.248    | 2.6325 | 0.2289 | 1209.42 | 1209.34 | 4994.7  | 1 | 729.2                                                                           | 83.3 | 1  | K.EFPGFLENQK.D                      |
| gi 88948848 ref X |                          | 2      | 0.196  | 107     | 11186   | 9.1     | U | PREDICTED: hypothetical protein XP_950274 [Homo sapiens]                        |      |    |                                     |
|                   | HsHeLa-FLAG-IP_S100_Ti   | 2.8382 | 0.1203 | 932.36  | 933.006 | 3007.7  | 7 | 641.4                                                                           | 92.9 | 1  | K.LLEGEESR.L                        |
|                   | HsHeLa-FLAG-IP_S100_Ti   | 4.3215 | 0.1842 | 1477.47 | 1476.71 | 8315.4  | 1 | 1887.4                                                                          | 87.5 | 5  | R.LESGMQNMSIHTK.T                   |
| gi 5031931 ref NF |                          | 3      | 0.195  | 215     | 23384   | 4.6     | U | nascent-polypeptide-associated complex alpha polypeptide [Homo sapiens]         |      |    |                                     |
| *                 | HsFLAG-MOCK_300mM_T      | 3.991  | 0.2185 | 1551.84 | 1550.88 | 5870.5  | 1 | 1385.7                                                                          | 83.3 | 5  | K.NILFVITKPDVYK.S                   |
| *                 | Hs293FLP_TREX_Ti_102.2   | 4.6715 | 0.4282 | 1484.95 | 1485.63 | 9384.2  | 1 | 1707.8                                                                          | 73.1 | 4  | K.SPASDTYIVFGEAK.I                  |
| *                 | HsFLAG-Control_HeLa_S10  | 2.5519 | 0.1492 | 1615.3  | 1615.78 | 9381.8  | 2 | 688.3                                                                           | 57.1 | 1  | K.IEDLSQQAQLAAAEK.F                 |
| gi 4503423 ref NF |                          | 2      | 0.195  | 164     | 17748   | 6.6     | U | dUTP pyrophosphatase isoform 2 [Homo sapiens]                                   |      |    |                                     |
| gi 70906444 ref N |                          | 2      | 0.227  | 141     | 15395   | 6.5     | U | dUTP pyrophosphatase isoform 3 [Homo sapiens]                                   |      |    |                                     |
| gi 70906441 ref N |                          | 2      | 0.127  | 252     | 26563   | 9.4     | U | dUTP pyrophosphatase isoform 1 precursor [Homo sapiens]                         |      |    |                                     |
|                   | HsGST-MOCK_Ti_403.270    | 2.9871 | 0.1544 | 1707.62 | 1706.85 | 8757.9  | 1 | 1109.7                                                                          | 67.9 | 1  | K.HFIDVAGAGVIDEDYR.G                |
|                   | HsGST-MOCK_Ti_402.307    | 4.5182 | 0.4462 | 2067.77 | 2068.25 | 7254.6  | 1 | 1790.8                                                                          | 75   | 5  | R.IFYPEIEEVQALDDTER.G               |
| gi 4507651 ref NF |                          | 3      | 0.194  | 248     | 28522   | 4.7     | U | tropomyosin 4 [Homo sapiens]                                                    |      |    |                                     |
| gi 89028749 ref X |                          | 3      | 0.224  | 214     | 24866   | 5.1     | U | PREDICTED: similar to tropomyosin 4 [Homo sapiens]                              |      |    |                                     |
| gi 51467148 ref X |                          | 3      | 0.224  | 214     | 24926   | 5       | U | PREDICTED: similar to tropomyosin 4 [Homo sapiens]                              |      |    |                                     |
|                   | HsFLAG-MOCK_300mM_T      | 3.7804 | 0.2326 | 1885.9  | 1885.09 | 7915.4  | 1 | 1326.7                                                                          | 44.6 | 1  | R.RIQLVEEELDRAQER.L                 |
|                   | Hs293FLP_TREX_Ti_104.1   | 4.3686 | 0.233  | 1444.9  | 1444.67 | 9084.8  | 1 | 1752.4                                                                          | 79.2 | 3  | R.LATALQKLEEAQK.A                   |
|                   | HsHeLa_Control-MG_Ti_10  | 2.9692 | 0.2388 | 2341.94 | 2341.5  | 10550.9 | 2 | 761.3                                                                           | 42.1 | 1  | K.EENVGLHQTLDTLNELNCI.-             |
| gi 34594669 ref N |                          | 5      | 0.194  | 237     | 26927   | 6.8     | U | HCCA2 protein [Homo sapiens]                                                    |      |    |                                     |
| *                 | HsHeLa_Control-MG_Ti_20  | 3.1815 | 0.1511 | 1216.34 | 1216.38 | 6626.6  | 1 | 999.5                                                                           | 88.9 | 2  | R.KAYLEPEHTK.A                      |
| *                 | HsFlag1P_Ti_106.2812.281 | 4.1073 | 0.3687 | 1705.57 | 1706.04 | 8219.2  | 1 | 1209.2                                                                          | 69.2 | 2  | R.ITDFQFKELVVLPR.E                  |
|                   | HsFLAG-Control_293_Ti_20 | 2.426  | 0.1213 | 825.39  | 826.027 | 3728.7  | 6 | 344.9                                                                           | 83.3 | 1  | K.ELVVLPR.E                         |
| *                 | HsFLAG-Control_293_Ti_20 | 3.0839 | 0.2053 | 1264.12 | 1264.42 | 5205.1  | 1 | 761.4                                                                           | 75   | 2  | K.LVTDEDVFPTK.Y                     |
| *                 | HsHeLa_Control-MG_Ti_20  | 2.7482 | 0.0849 | 1298.61 | 1298.44 | 5399.3  | 2 | 576.5                                                                           | 70   | 1  | R.EFPSSFESLVR.K                     |
| gi 67782328 ref N |                          | 13     | 0.192  | 1722    | 182686  | 7       | U | trinucleotide repeat containing 6B isoform 1 [Homo sapiens]                     |      |    |                                     |
|                   | HsHeLa_Control-MG_Ti_20  | 5.8275 | 0.3555 | 3187.08 | 3187.53 | 9148.7  | 1 | 1087.7                                                                          | 28.1 | 4  | K.VPEVTKPSLSQPTAASPIGSSPPVNGGNAK.R  |
| *                 | Hs293FLP-MG_Ti_204.325   | 3.5672 | 0.274  | 2989.86 | 2990.22 | 8288.9  | 1 | 548.3                                                                           | 24.1 | 1  | R.IGPGSGFSNFPNSNPSAWPALVQEGTSR.K    |
| *                 | HsHeLa_Control_Ti_102.13 | 4.4246 | 0.4734 | 2209.82 | 2210.28 | 6919.4  | 1 | 1086.6                                                                          | 52.4 | 1  | K.GALETDNSNSSAQVSTVGGQTSR.E         |
| *                 | HsHeLa_Control-MG_Ti_20  | 3.7253 | 0.3534 | 1989.22 | 1990.11 | 6952    | 1 | 1303.7                                                                          | 64.7 | 2  | K.GHPLPENQGNAQAPCWGR.S              |
| *                 | HsHeLa_Control-MG_Ti_20  | 4.1572 | 0.2028 | 1990.78 | 1990.11 | 6895    | 1 | 1914.7                                                                          | 51.5 | 1  | K.GHPLPENQGNAQAPCWGR.S              |

|                    |                          |        |        |         |         |         |     |        |      |                                                                                      |
|--------------------|--------------------------|--------|--------|---------|---------|---------|-----|--------|------|--------------------------------------------------------------------------------------|
| *                  | HsHeLa_Control-MG_Ti_20  | 5.0235 | 0.4008 | 2242.85 | 2243.49 | 7146.3  | 1   | 1488.8 | 44.4 | 2 R.SYRPTHPDCQAVLQTLISR.T<br>K.NSNWESSASKPVSGWEGGQNEIGTWGNGGNASL                     |
| *                  | HsHeLa_Control-MG_Ti_10  | 5.9871 | 0.3165 | 3722.64 | 3722.88 | 6529.4  | 1   | 1615.1 | 31.2 | 3 ASK.G                                                                              |
|                    | HsHeLa_Control-MG_Ti_20  | 3.75   | 0.3507 | 1476.9  | 1476.55 | 7400.4  | 1   | 1278.9 | 67.9 | 1 K.GGSHGLFGNSTAQSR.G                                                                |
|                    | HsHeLa_Control-MG_Ti_10  | 3.5359 | 0.2017 | 3129.73 | 3127.4  | 4963    | 4   | 449.2  | 25   | 1 R.GGSPYNQFDIIPGDTLGGHTGPAGDSWLPAK.S                                                |
|                    | HsFLAG-Control_293_Ti_20 | 6.3886 | 0.4317 | 3766.82 | 3765.13 | 5331.3  | 1   | 1184.2 | 30   | 7 K.GIQNIDPESDPYVTPGSVLGGTATSPIVDTDHQLLR.D<br>R.DNTTGSNSSLNTSLPSPGAWPYSASDNSFTNVHSTS |
|                    | HsHeLa_Control-MG_Ti_20  | 4.3594 | 0.4181 | 3900.73 | 3902.05 | 5159.1  | 1   | 492.4  | 23   | 2 AK.F                                                                               |
|                    | HsFLAG-MOCK_300mM_T      | 2.5037 | 0.25   | 1988.67 | 1989.16 | 5129    | 3   | 268.7  | 38.2 | 1 K.STWSPDPIGHNPTHLSNK.M                                                             |
|                    | HsHeLa_Control-MG_Ti_10  | 5.062  | 0.4198 | 3689.8  | 3687.11 | 7620.6  | 1   | 694.8  | 23.5 | 2 R.LASASTWSDGGSVRPSYWLVLHNLTPQIDGSTLR.T                                             |
| gij 4506583 ref NF |                          | 9      | 17     | 0.192   | 616     | 68138   | 7.2 | U      |      | replication protein A1, 70kDa [Homo sapiens]                                         |
| *                  | HsFLAG-Control_HeLa_S10  | 3.394  | 0.3446 | 1485.41 | 1486.58 | 9434.7  | 1   | 1637   | 66.7 | 1 K.AAGPSLSHTSGGTQSK.V                                                               |
| *                  | HsHeLa_Control-MG_Ti_10  | 2.3544 | 0.3878 | 1485.61 | 1486.58 | 5058.9  | 2   | 269.3  | 43.3 | 1 K.AAGPSLSHTSGGTQSK.V                                                               |
| *                  | HsHeLa_Control-MG_Ti_10  | 3.311  | 0.4488 | 1486.55 | 1486.58 | 5405.3  | 1   | 951.4  | 66.7 | 4 K.AAGPSLSHTSGGTQSK.V                                                               |
| *                  | HsFLAG-Control_HeLa_S10  | 3.3501 | 0.3639 | 1403.56 | 1403.66 | 4849.5  | 1   | 751    | 75   | 2 K.VVPIASLTPYQSK.W                                                                  |
| *                  | HsHeLa_Control-MG_Ti_10  | 4.534  | 0.415  | 1448.76 | 1448.67 | 7227.7  | 1   | 2032   | 83.3 | 2 K.SKDSLVDIIGICK.S                                                                  |
| *                  | HsFLAG-Control_HeLa_S10  | 2.788  | 0.2959 | 1407.31 | 1405.55 | 7304.2  | 1   | 533.4  | 58.3 | 1 K.VVTATLWGEDADK.F                                                                  |
| *                  | HsFLAG-Control_HeLa_NE   | 3.0877 | 0.1726 | 2205.98 | 2206.5  | 9621.5  | 6   | 662.8  | 40   | 1 R.SLSVLSSTIINPDIPEAYK.L                                                            |
| *                  | HsHeLa_Control-MG_Ti_10  | 4.8541 | 0.1793 | 2009.86 | 2009.18 | 7583.1  | 1   | 2230.2 | 69.4 | 4 R.GWFDAEGQALDGVISIDLK.S                                                            |
| *                  | HsHeLa_Control-MG_Ti_10  | 2.646  | 0.2114 | 2546.46 | 2546.8  | 6814.9  | 1   | 493.7  | 40.9 | 1 K.SENLGQGDKPDYFSSVATVVYLR.K                                                        |
| gij 34932414 ref N |                          | 11     | 64     | 0.191   | 471     | 54232   | 8.9 | U      |      | non-POU domain containing, octamer-binding [Homo sapiens]                            |
| *                  | HsFLAG-MOCK_300mM_T      | 2.8917 | 0.1414 | 1145.86 | 1144.32 | 6197.4  | 1   | 798    | 72.2 | 1 K.AGEVFIHKDK.G                                                                     |
| *                  | HsFLAG-Control_HeLa_NE   | 5.4696 | 0.4091 | 2668.64 | 2669.95 | 7010.2  | 1   | 1077.8 | 50   | 12 R.NLPQYVSNELLEAFSVFGQVER.A                                                        |
| *                  | HsFLAG-Control_293_Ti_10 | 5.5133 | 0.424  | 2668.76 | 2669.95 | 10060.2 | 1   | 1959.7 | 54.5 | 19 R.NLPQYVSNELLEAFSVFGQVER.A                                                        |
| *                  | HsFLAG-Control_HeLa_NE   | 4.6452 | 0.4418 | 2669.33 | 2669.95 | 8265.6  | 1   | 1259.7 | 36.4 | 3 R.NLPQYVSNELLEAFSVFGQVER.A                                                         |
| *                  | HsGST-MOCK_Ti_406.364    | 3.7252 | 0.1932 | 2669.4  | 2669.95 | 8162.5  | 1   | 1171.3 | 36.4 | 1 R.NLPQYVSNELLEAFSVFGQVER.A                                                         |
| *                  | Hs283FLP_Ti_106.3244.32  | 3.5353 | 0.2008 | 2669.79 | 2669.95 | 7195.9  | 1   | 812.5  | 30.7 | 1 R.NLPQYVSNELLEAFSVFGQVER.A                                                         |
| *                  | Hs283FLP_Ti_105.4217.42  | 5.1611 | 0.3675 | 2670.03 | 2669.95 | 10888.2 | 1   | 2045.6 | 52.3 | 12 R.NLPQYVSNELLEAFSVFGQVER.A                                                        |
| *                  | Hs283FLP_Ti_105.1387.13  | 2.5891 | 0.2802 | 1233.9  | 1232.43 | 6290    | 1   | 985.7  | 68.2 | 1 K.GIVEFSGKPAAR.K                                                                   |
| *                  | HsGST-MOCK_Ti_103.109    | 4.3871 | 0.3215 | 1541.56 | 1541.72 | 8485.2  | 1   | 1508.1 | 81.8 | 5 R.RMEELHNQEVQK.R                                                                   |
| *                  | HsHeLa_Control-MG_Ti_10  | 4.1919 | 0.4811 | 2165.03 | 2164.44 | 6260.8  | 1   | 1062.1 | 57.1 | 1 R.FGQAATMEGIGAIGGTPPAFNR.A                                                         |
|                    | HsFLAG-Control_HeLa_NE   | 2.8838 | 0.299  | 1072.5  | 1073.19 | 4173.1  | 2   | 502.1  | 70   | 8 R.AAPGAEFAPNK.R                                                                    |
| gij 89037397 ref X |                          | 30     | 92     | 0.19    | 2028    | 228228  | 6.2 | U      |      | PREDICTED: hypothetical protein LOC440193 isoform 1 [Homo sapiens]                   |
| gij 89037763 ref X |                          | 30     | 92     | 0.19    | 2028    | 228212  | 6.2 | U      |      | PREDICTED: similar to DVL-binding protein DAPLE isoform 9 [Homo sapiens]             |
|                    | HsHeLa_Control-MG_Ti_10  | 2.4386 | 0.1368 | 1081.02 | 1081.18 | 3952.6  | 8   | 272    | 68.8 | 2 K.HVNNDVNLR.I                                                                      |
|                    | HsHeLa_Control-MG_Ti_20  | 3.0553 | 0.2499 | 1081.49 | 1081.18 | 3888.2  | 1   | 706.6  | 93.8 | 4 K.HVNNDVNLR.I                                                                      |
|                    | HsHeLa_Control-MG_Ti_10  | 3.5154 | 0.345  | 1631.02 | 1630.9  | 6937.3  | 1   | 1453.1 | 73.1 | 1 K.VLLLVLGCAVQCER.K                                                                 |
|                    | HsHeLa_Control-MG_Ti_10  | 4.0074 | 0.2952 | 1495.76 | 1494.69 | 5711.6  | 1   | 981.4  | 75   | 6 R.DYLQAQHPPSPIK.S                                                                  |
|                    | Hs283FLP_Ti_102.1330.13  | 3.8859 | 0.383  | 1871.72 | 1870.88 | 3550.4  | 1   | 402.4  | 52.8 | 8 K.SSSADSTPSPTSSLSSEDK.Q                                                            |
|                    | Hs293FLP-MG_Ti_104.142   | 4.3789 | 0.2271 | 1457.96 | 1456.64 | 5393.2  | 1   | 1192   | 79.2 | 2 K.VKQENIQLAADAR.S                                                                  |
|                    | HsHeLa_Control-MG_Ti_10  | 3.5203 | 0.3533 | 1475.84 | 1474.61 | 6876.7  | 4   | 805.6  | 66.7 | 4 K.ENQSLQSTIQGLR.D                                                                  |
|                    | HsHeLa_Control_Ti_102.21 | 3.8544 | 0.2623 | 1261.4  | 1261.42 | 4593.5  | 1   | 978.3  | 77.3 | 2 R.DASLVLEESGLK.C                                                                   |
|                    | Hs283FLP_Ti_102.2739.27  | 3.6572 | 0.2866 | 1775.92 | 1775.91 | 7172.1  | 1   | 1311.3 | 78.6 | 6 K.QSNQDLETLSSELR.E                                                                 |
|                    | HsHeLa_Control-MG_Ti_10  | 3.0918 | 0.3859 | 1268.63 | 1269.4  | 4967.6  | 1   | 556.2  | 63.6 | 2 K.ALHQTVTEANGK.L                                                                   |
|                    | HsHeLa_Control-MG_Ti_20  | 3.2149 | 0.3804 | 1269.46 | 1269.4  | 4580.6  | 1   | 453.1  | 63.6 | 2 K.ALHQTVTEANGK.L                                                                   |
|                    | HsHeLa_Control-MG_Ti_20  | 3.3412 | 0.3703 | 1269.48 | 1269.4  | 6189.5  | 1   | 969.1  | 72.7 | 2 K.ALHQTVTEANGK.L                                                                   |
|                    | HsHeLa_Control-MG_Ti_10  | 3.9838 | 0.4058 | 1269.67 | 1269.4  | 7604.9  | 1   | 1445.8 | 81.8 | 2 K.ALHQTVTEANGK.L                                                                   |

|                   |                          |        |        |         |         |        |       |        |      |    |                                                                      |
|-------------------|--------------------------|--------|--------|---------|---------|--------|-------|--------|------|----|----------------------------------------------------------------------|
|                   | HsHeLa_Control-MG_Ti_20  | 5.4591 | 0.3586 | 3040    | 3041.34 | 9540.4 | 1     | 2482.7 | 37.5 | 2  | R.KVTSLETATEKVEALEHESQGLQLENR.T                                      |
|                   | HsHeLa_Control-MG_Ti_20  | 5.6116 | 0.4009 | 2914.55 | 2913.17 | 9018.5 | 1     | 2242.5 | 39   | 3  | K.VTSLETATEKVEALEHESQGLQLENR.T                                       |
|                   | HsHeLa_Control_Ti_102.33 | 5.4945 | 0.313  | 1916.38 | 1916.14 | 5290.9 | 1     | 1528.2 | 78.1 | 9  | K.SLDTLQNVSLQLEGLER.D                                                |
|                   | HsHeLa_Control_Ti_102.28 | 4.748  | 0.3613 | 1705.96 | 1705.82 | 6961.4 | 1     | 1651.3 | 75   | 4  | K.TQTLESELGELEAER.Q                                                  |
|                   | HsHeLa_Control-MG_Ti_10  | 5.1275 | 0.4153 | 2587.06 | 2586.91 | 7493.9 | 1     | 1044   | 50   | 2  | K.EQLQHLETQNVTFSSQILTLQK.Q                                           |
|                   | Hs283FLP_Ti_104.1409.14  | 3.3123 | 0.2061 | 2047.15 | 2047.23 | 7658.9 | 1     | 550.6  | 44.1 | 1  | K.QSAFLQEHNTTLQQTAK.L                                                |
|                   | HsHeLa_Control-MG_Ti_10  | 4.3331 | 0.287  | 3156.54 | 3156.48 | 5781.7 | 2     | 465.6  | 24.1 | 2  | K.LQVENSTLSSQSAALTAQYTLQNHHTAK.E                                     |
|                   | HsHeLa_Control-MG_Ti_20  | 2.9596 | 0.1168 | 1136.71 | 1136.34 | 8264.8 | 2     | 1102.8 | 81.2 | 1  | R.VNFLHHQLK.G                                                        |
|                   | HsHeLa_Control-MG_Ti_10  | 2.1222 | 0.2025 | 1313.84 | 1314.4  | 4590.5 | 5     | 262.5  | 45   | 1  | K.GEYEELHAHTK.E                                                      |
|                   | HsHeLa_Control-MG_Ti_10  | 3.8767 | 0.288  | 1316.35 | 1314.4  | 8494.2 | 1     | 1395.6 | 80   | 4  | K.GEYEELHAHTK.E                                                      |
|                   | HsHeLa_Control-MG_Ti_10  | 2.9306 | 0.2367 | 1257.89 | 1257.36 | 4863.1 | 1     | 638.6  | 72.2 | 1  | K.LDNHCELLSR.L                                                       |
|                   | Hs293FLP-MG_Ti_102.262   | 4.897  | 0.3411 | 2626.22 | 2624.82 | 6482.6 | 1     | 864.4  | 45.8 | 8  | K.STVDSPPWQLESSDPASPAASQPLR.S                                        |
|                   | HsHeLa_Control_Ti_102.13 | 4.5345 | 0.4469 | 2047.79 | 2047.07 | 4678   | 1     | 1488.9 | 77.8 | 4  | R.SQAENPDTPALGNSCAEER.D                                              |
|                   | HsHeLa_Control-MG_Ti_10  | 3.1378 | 0.37   | 1924.49 | 1925.03 | 3993.7 | 1     | 323.3  | 47.2 | 4  | R.TCSTSATTTAPSNSTPIAR.H                                              |
|                   | HsHeLa_Control_Ti_103.24 | 4.0093 | 0.2938 | 2494.4  | 2493.57 | 4965.8 | 1     | 576.5  | 47.5 | 1  | K.GYNSDDNLCEPSLEFEVFNHR.Q                                            |
|                   | HsHeLa_Control-MG_Ti_20  | 2.7714 | 0.1956 | 1497.34 | 1496.62 | 3534.4 | 1     | 260.2  | 58.3 | 1  | R.QYVSRPSSLESSR.N                                                    |
|                   | HsHeLa_Control-MG_Ti_10  | 2.8726 | 0.1501 | 1164.78 | 1164.35 | 4943.3 | 3     | 778.2  | 75   | 1  | R.AFSLASADLLR.A                                                      |
| gi 11863154 ref N |                          | 7      | 10     | 0.19    | 511     | 57210  | 6.2 U |        |      |    | archain [Homo sapiens]                                               |
| *                 | HsFLAG-MOCK_300mM_T      | 4.8082 | 0.3926 | 3089.06 | 3086.44 | 7213.2 | 1     | 948.7  | 28.2 | 2  | K.APGFGGFGSSAVSGSTAAMITETIETDKPK.V                                   |
| *                 | HsFLAG-MOCK_300mM_T      | 3.5666 | 0.2956 | 1465.96 | 1464.67 | 5311.8 | 1     | 797.1  | 75   | 2  | K.KGVQLQTHPNVDK.K                                                    |
| *                 | HsFLAG-MOCK_300mM_T      | 3.654  | 0.2272 | 1336.78 | 1336.49 | 6492.9 | 1     | 1139   | 77.3 | 1  | K.GVQLQTHPNVDK.K                                                     |
| *                 | HsFLAG-MOCK_300mM_T      | 3.6743 | 0.2943 | 1467.16 | 1464.67 | 5865.7 | 1     | 886.2  | 70.8 | 2  | K.GVQLQTHPNVDK.L                                                     |
| *                 | HsFLAG-MOCK_300mM_T      | 2.3084 | 0.1405 | 1319.62 | 1320.62 | 4235.4 | 7     | 321.9  | 50   | 1  | K.KLFTAESLIGLK.N                                                     |
| *                 | HsFLAG-Control_HeLa_NE   | 2.6395 | 0.2665 | 2688.98 | 2689    | 7147.5 | 1     | 437.5  | 35.4 | 1  | K.SGSLEFSIAGQPNDFFPVQVSFVSK.K                                        |
| *                 | HsFLAG-Control_HeLa_NE   | 2.7775 | 0.1977 | 1807.23 | 1807.05 | 7966.8 | 3     | 583    | 50   | 1  | R.FSTETTFVLVDKYEIL-                                                  |
| gi 7706310 ref Nf |                          | 9      | 37     | 0.189   | 402     | 47620  | 10 U  |        |      |    | LUC7-like 2 [Homo sapiens]                                           |
| *                 | HsHeLa_Control-MG_Ti_20  | 5.2293 | 0.5201 | 1866.12 | 1867    | 7993.3 | 1     | 2338.5 | 76.7 | 10 | K.SHLLNCCPHDVLGTR.M                                                  |
| *                 | HsHeLa_Control-MG_Ti_10  | 2.135  | 0.088  | 823.92  | 823.971 | 4061.7 | 3     | 537.8  | 83.3 | 4  | K.VHDLALR.A                                                          |
|                   | Hs293FLP_Ti_303.1279.12  | 2.8366 | 0.2292 | 1167.66 | 1168.29 | 4978   | 1     | 557.6  | 66.7 | 1  | R.VHELNEEIGK.L                                                       |
|                   | HsHeLa_Control-MG_Ti_20  | 2.9432 | 0.147  | 1168.12 | 1168.29 | 5296.9 | 1     | 676.8  | 77.8 | 1  | R.VHELNEEIGK.L                                                       |
|                   | Hs293FLP_Ti_303.1278.12  | 3.1115 | 0.1986 | 1170.57 | 1168.29 | 4706.3 | 1     | 711    | 83.3 | 1  | R.VHELNEEIGK.L                                                       |
| *                 | Hs293FLP-MG_Ti_201.046   | 5.1149 | 0.3732 | 1617.4  | 1617.71 | 7062.6 | 1     | 1870.9 | 78.6 | 13 | K.VEQLGAEGNVEESQK.V                                                  |
|                   | HsHeLa_Control-MG_Ti_10  | 1.9477 | 0.1266 | 844.78  | 844.946 | 3744.8 | 1     | 350.9  | 64.3 | 3  | R.LADHFGGK.L                                                         |
| *                 | HsHeLa_Control-MG_Ti_20  | 2.8551 | 0.0864 | 1098.47 | 1098.33 | 5379.3 | 3     | 1040   | 87.5 | 3  | K.LHLGFIEIR.E                                                        |
| *                 | HsHeLa_Control-MG_Ti_20  | 3.4429 | 0.2076 | 1384    | 1383.43 | 5777.4 | 2     | 916.7  | 80   | 1  | R.FRQDLASCDR.D                                                       |
| gi 14591909 ref N |                          | 6      | 12     | 0.189   | 297     | 34363  | 9.7 U |        |      |    | ribosomal protein L5 [Homo sapiens]                                  |
| *                 | Hs293FLP_TREX_Ti_102.2   | 3.5941 | 0.3635 | 1223.23 | 1223.38 | 8240.9 | 1     | 1735.3 | 88.9 | 2  | R.DIICQIAYAR.I                                                       |
|                   | Hs293FLP_TREX_Ti_104.1   | 2.9722 | 0.3363 | 1338.29 | 1339.49 | 4891.1 | 1     | 705.9  | 57.7 | 2  | K.GAVDGGLSIPHSTK.R                                                   |
|                   | Hs293FLP_TREX_Ti_103.1   | 4.1716 | 0.2622 | 1339.27 | 1339.49 | 4845.2 | 1     | 1253.4 | 76.9 | 2  | K.GAVDGGLSIPHSTK.R                                                   |
| *                 | Hs293FLP_TREX_Ti_104.1   | 3.5179 | 0.2293 | 1187.29 | 1186.27 | 4818.2 | 3     | 730    | 77.8 | 2  | K.RFPGYDSESK.E                                                       |
|                   | Hs293FLP_TREX_Ti_104.1   | 2.5259 | 0.2273 | 1131.38 | 1130.25 | 5746.3 | 5     | 515    | 75   | 1  | K.EFNAEVHRK.H                                                        |
| *                 | Hs293FLP_TREX_Ti_106.2   | 3.5276 | 0.3794 | 1499.47 | 1498.68 | 6714.1 | 1     | 1128.1 | 75   | 3  | K.AHAIRENPVYEK.K                                                     |
| gi 19923485 ref N |                          | 8      | 48     | 0.188   | 432     | 51466  | 9.8 U |        |      |    | cisplatin resistance-associated overexpressed protein [Homo sapiens] |
| gi 52426743 ref N |                          | 8      | 48     | 0.188   | 432     | 51466  | 9.8 U |        |      |    | cisplatin resistance-associated overexpressed protein [Homo sapiens] |
|                   | HsHeLa_Control-MG_Ti_10  | 4.715  | 0.3591 | 2014.79 | 2013.19 | 5420.5 | 1     | 1054.2 | 70   | 14 | K.YYLCGFCAELFTNTR.S                                                  |
|                   | HsHeLa_Control_Ti_103.28 | 2.3911 | 0.2409 | 1320.72 | 1321.52 | 3618.4 | 1     | 203    | 55   | 1  | R.YLQSLLAEVER.R                                                      |
|                   | HsHeLa_Control_Ti_103.28 | 3.869  | 0.1804 | 1321.88 | 1321.52 | 5100.8 | 1     | 1376.5 | 85   | 5  | R.YLQSLLAEVER.R                                                      |
|                   | HsF-IP-293-MG_Ti_103.13  | 4.9884 | 0.4648 | 1716.6  | 1715.86 | 7799.9 | 1     | 1872.8 | 70.6 | 12 | R.LALSQNNQSSGAAGPTGK.N                                               |
|                   | Hs293FLP-MG_Ti_104.126   | 4.6347 | 0.377  | 2217.24 | 2216.37 | 6776.2 | 1     | 1282.6 | 59.5 | 3  | R.LALSQNNQSSGAAGPTGKNEEK.I                                           |



|                   |                          |        |        |         |         |        |      |        |      |    |                                                                                            |
|-------------------|--------------------------|--------|--------|---------|---------|--------|------|--------|------|----|--------------------------------------------------------------------------------------------|
|                   | Hs293FLP-MG_Ti_103.137   | 3.1    | 0.1619 | 1144.76 | 1144.31 | 8391.7 | 2    | 1711.7 | 93.8 | 3  | K.LVEQLKEER.E                                                                              |
|                   | Hs293FLP-MG_Ti_102.206   | 4.3169 | 0.4334 | 1502.39 | 1500.6  | 6177.5 | 1    | 1303.4 | 76.9 | 9  | R.STTSTIESFAAQEK.Q                                                                         |
|                   | HsHeLa_Control-MG_Ti_20  | 2.8696 | 0.1936 | 1047.38 | 1047.19 | 8470   | 1    | 1110   | 81.2 | 1  | K.ATVEELKEK.L                                                                              |
| gi 34577083 ref N |                          | 2      | 3      | 0.188   | 224     | 25545  | 8.7  | U      |      |    | ras suppressor protein 1 isoform 2 [Homo sapiens]                                          |
| gi 6912638 ref NF |                          | 2      | 3      | 0.152   | 277     | 31540  | 8.6  | U      |      |    | ras suppressor protein 1 isoform 1 [Homo sapiens]                                          |
|                   | HsFLAG-Control_HeLa_NE   | 5.5854 | 0.3289 | 2822.82 | 2820.17 | 5312.7 | 1    | 944.3  | 37   | 2  | K.NLEVLNFFNMQIEELPTQISSLQK.L                                                               |
|                   | HsFLAG-Control_HeLa_NE   | 3.0516 | 0.2123 | 2021.55 | 2021.27 | 4179.2 | 3    | 509.1  | 52.9 | 1  | R.ALYLSNDNDFEILPPDIGK.L                                                                    |
| gi 23308579 ref N |                          | 2      | 3      | 0.188   | 160     | 18697  | 4.5  | U      |      |    | inactive progesterone receptor, 23 kD [Homo sapiens]                                       |
|                   | Hs293FLP_TREX_Ti_102.2   | 3.4478 | 0.4062 | 1446.09 | 1446.57 | 7189   | 1    | 1242.3 | 75   | 2  | K.LTFSCLOGGSDNFK.H                                                                         |
| *                 | HsHeLa_Control-MG_Ti_10  | 2.6648 | 0.25   | 2070.1  | 2068.22 | 6562.9 | 2    | 430    | 46.9 | 1  | K.HLNEIDLFCIDPNDSK.H                                                                       |
| gi 4504425 ref NF |                          | 3      | 6      | 0.186   | 215     | 24894  | 5.7  | U      |      |    | high-mobility group box 1 [Homo sapiens]                                                   |
|                   | HsHeLa3_Ti_104.2319.231  | 2.6019 | 0.1928 | 1498.04 | 1497.68 | 7096.5 | 1    | 627.9  | 59.1 | 1  | K.MSSYAFFVQTCR.E                                                                           |
| *                 | HsHeLa3_Ti_104.1819.181  | 2.9239 | 0.1564 | 1466.53 | 1465.56 | 5900.4 | 1    | 823.3  | 70.8 | 1  | K.HPDASVNFSEFSK.K                                                                          |
|                   | HsGST-MOCK_Ti_104.147    | 3.5722 | 0.3969 | 1521.39 | 1521.76 | 5608   | 1    | 1015.5 | 71.4 | 4  | K.IKGEHPGLSIGDVAK.K                                                                        |
| gi 5453595 ref NF |                          | 6      | 13     | 0.185   | 475     | 51673  | 8    | U      |      |    | adenylyl cyclase-associated protein [Homo sapiens]                                         |
| *                 | HsFLAG-Control_HeLa_S1   | 5.3021 | 0.1888 | 2352.2  | 2352.69 | 5378.7 | 1    | 1176.2 | 40.9 | 1  | K.AGAAPYVQAFDSSLGAPVAEYLK.I                                                                |
| *                 | HsFLAG-Control_HeLa_NE   | 4.3855 | 0.3475 | 2352.66 | 2352.69 | 8797.6 | 1    | 1004.8 | 45.5 | 3  | K.AGAAPYVQAFDSSLGAPVAEYLK.I                                                                |
| *                 | HsFLAG-Control_HeLa_S1   | 3.6551 | 0.3843 | 1758.35 | 1758.94 | 6587.8 | 1    | 1173.8 | 66.7 | 1  | R.ALLVTASQCQPAENK.L                                                                        |
| *                 | HsFLAG-Control_HeLa_S1   | 3.1641 | 0.1591 | 1427.79 | 1427.68 | 4660   | 1    | 721.4  | 70.8 | 2  | K.LSDLLAPISEQIK.E                                                                          |
| *                 | HsFLAG-Control_HeLa_S1   | 4.0109 | 0.366  | 1929.51 | 1929.18 | 6535.1 | 4    | 476.4  | 44.1 | 2  | R.SALFAQINQGESITHALK.H                                                                     |
| *                 | HsFLAG-Control_HeLa_S1   | 5.0555 | 0.3987 | 2073.56 | 2074.25 | 6428.9 | 1    | 1515.9 | 67.6 | 4  | R.VENQENVSNLVIEDTELK.Q                                                                     |
| gi 4506685 ref NF |                          | 2      | 4      | 0.185   | 151     | 17222  | 10.5 | U      |      |    | ribosomal protein S13 [Homo sapiens]                                                       |
| *                 | HsGST-MOCK_Ti_103.175    | 3.5349 | 0.233  | 1382.28 | 1382.69 | 3789.8 | 1    | 980.2  | 79.2 | 2  | K.KGLTPSQIGVILR.D                                                                          |
| *                 | HsGST-MOCK_Ti_404.377    | 3.2119 | 0.278  | 1694.35 | 1694.97 | 4652.7 | 1    | 530.7  | 64.3 | 2  | K.GLAPDLPEDLYHLIK.K                                                                        |
| gi 4505821 ref NF |                          | 2      | 3      | 0.185   | 146     | 16572  | 8    | U      |      |    | prolactin-induced protein [Homo sapiens]                                                   |
| *                 | HsFLAG-Control_Hela_Ti_1 | 3.5951 | 0.3473 | 1815.72 | 1816.11 | 3747.1 | 1    | 401.5  | 56.7 | 1  | K.TYLISSEIPLQGAFNYK.Y                                                                      |
| *                 | HsFLAG-Control_293_Ti_1  | 3.0888 | 0.3718 | 1357.72 | 1357.39 | 7757.4 | 1    | 1260.9 | 80   | 2  | K.YTACLCLDDNPK.T                                                                           |
| gi 4506643 ref NF |                          | 3      | 7      | 0.185   | 92      | 10275  | 10.4 | U      |      |    | ribosomal protein L37a [Homo sapiens]                                                      |
| *                 | Hs293FLP_TREX_Ti_106.2   | 2.3648 | 0.1791 | 1053.47 | 1054.24 | 4633.2 | 1    | 617.4  | 75   | 2  | K.KIEISQHAK.Y                                                                              |
| *                 | Hs293FLP_TREX_Ti_106.2   | 2.8755 | 0.0877 | 1054.41 | 1054.24 | 5422.9 | 1    | 1002   | 87.5 | 3  | K.KIEISQHAK.Y                                                                              |
|                   | Hs293FLP_TREX_Ti_102.1   | 2.0743 | 0.1805 | 1022.3  | 1023.06 | 5628.8 | 5    | 343.4  | 64.3 | 2  | K.YTCSFCGK.T                                                                               |
| gi 7706322 ref NF |                          | 3      | 6      | 0.184   | 244     | 28068  | 6.7  | U      |      |    | chromosome 14 open reading frame 166 [Homo sapiens]                                        |
| *                 | HsHeLa3_Ti_105.1774.177  | 4.0372 | 0.4891 | 1722.11 | 1721.88 | 5932.4 | 1    | 976.1  | 67.9 | 1  | K.LTALDYHNPAGFNCK.D                                                                        |
| *                 | HsFLAG-Control_HeLa_NE   | 3.6267 | 0.3406 | 1813.28 | 1814.01 | 8799.8 | 1    | 1189.4 | 60   | 3  | K.NAEPLINLDVNNPDFK.A                                                                       |
| *                 | HsHeLa3_Ti_105.3402.340  | 4.2302 | 0.1658 | 1499.7  | 1498.83 | 5807.2 | 1    | 1597.9 | 76.9 | 2  | K.AGVMALANLLQIQR.H                                                                         |
| gi 5803227 ref NF |                          | 3      | 14     | 0.184   | 245     | 27764  | 4.8  | U      |      |    | tyrosine 3/tryptophan 5-monooxygenase activation protein, theta polypeptide [Homo sapiens] |
| *                 | HsFLAG-Control_293_Ti_1  | 3.7945 | 0.2291 | 1532.9  | 1533.59 | 9193.5 | 1    | 1423.3 | 69.2 | 1  | K.AVTEQGAELSNEER.N                                                                         |
| *                 | HsHeLa3_Ti_103.3724.372  | 3.1919 | 0.3463 | 1392.73 | 1392.6  | 6083   | 1    | 1108.3 | 81.8 | 2  | R.SICTTVLELLDK.Y                                                                           |
| *                 | HsHeLa_Control-MG_Ti_20  | 5.0264 | 0.4152 | 2146.55 | 2146.27 | 9674.8 | 1    | 1985.8 | 61.1 | 11 | K.TAFDEAIAELDTLNEDSYK.D                                                                    |
| gi 74275346 ref N |                          | 3      | 4      | 0.18    | 334     | 38340  | 6    | U      |      |    | S-adenosylmethionine decarboxylase 1 isoform 1 precursor [Homo sapiens]                    |
| gi 74275348 ref N |                          | 3      | 4      | 0.323   | 186     | 21301  | 5.1  | U      |      |    | S-adenosylmethionine decarboxylase 1 isoform 2 [Homo sapiens]                              |
|                   | HsHeLa_Control-MG_Ti_20  | 4.3662 | 0.4989 | 4113.17 | 4114.42 | 9402.1 | 1    | 1151   | 26.5 | 1  | K.SDGTYWTHITPEPEFSYVSFETNLSQTSYDDLIR.K                                                     |
|                   | HsFLAG-Control_MG_293_   | 3.5086 | 0.3111 | 1372.09 | 1371.58 | 5250.8 | 1    | 1323.9 | 86.4 | 2  | K.FVTTLFVNQSSK.C                                                                           |
|                   | HsHeLa_Control-MG_Ti_10  | 2.8036 | 0.327  | 1418.83 | 1418.68 | 5120   | 1    | 757.1  | 70.8 | 1  | R.TVLASPQKIEGFK.R                                                                          |
| gi 5174445 ref NF |                          | 4      | 9      | 0.178   | 399     | 45283  | 7.8  | U      |      |    | lanthionine synthetase C-like protein 1 [Homo sapiens]                                     |
| *                 | HsGST-MOCK_Ti_102.261    | 5.53   | 0.405  | 2508.49 | 2509.79 | 8557.9 | 1    | 1819.2 | 57.1 | 1  | K.IPQSHIQICETILTSGENLAR.K                                                                  |
| *                 | HsGST-MOCK_Ti_104.162    | 4.435  | 0.3993 | 1886.62 | 1887.2  | 4447.3 | 1    | 1095.8 | 73.3 | 4  | K.LHSLVKPSVDYVCQLK.F                                                                       |
| *                 | HsGST-MOCK_Ti_305.198    | 3.1584 | 0.271  | 1593.83 | 1594.69 | 5393.9 | 1    | 571.9  | 65.4 | 2  | K.FPSGNYPPIGDNDR.D                                                                         |
| *                 | HsGST-MOCK_Ti_302.393    | 5.5645 | 0.5147 | 2380.51 | 2380.63 | 7282.7 | 1    | 2256.2 | 72.2 | 2  | K.YLCLDAYQCADVIWQYGLLK.K                                                                   |

|                    |                          |        |        |         |         |         |   |                                                                                    |      |                                            |
|--------------------|--------------------------|--------|--------|---------|---------|---------|---|------------------------------------------------------------------------------------|------|--------------------------------------------|
| gi 5174449 ref NF  | 4                        | 6      | 0.178  | 213     | 22487   | 10.8    | U | H1 histone family, member X [Homo sapiens]                                         |      |                                            |
| *                  | Hs293FLP_TREX_Ti_102.1   | 3.1612 | 0.2488 | 1208.36 | 1208.4  | 6344.5  | 1 | 927.6                                                                              | 77.8 | 2 K.YSQLVVETIR.R                           |
| *                  | Hs293FLP_TREX_Ti_102.1   | 3.3239 | 0.2893 | 1342.35 | 1342.58 | 7134.1  | 1 | 988.6                                                                              | 72.7 | 2 K.ALVQNDTLLQVK.G                         |
| *                  | Hs293FLP_TREX_Ti_106.2   | 3.0662 | 0.2484 | 1490.7  | 1488.69 | 6681.5  | 1 | 1116.6                                                                             | 66.7 | 1 R.RGAPAAATAPAPTAHK.A                     |
| *                  | Hs293FLP_TREX_Ti_105.1   | 3.6308 | 0.3374 | 1332.33 | 1332.5  | 4033.1  | 2 | 788.7                                                                              | 75   | 1 R.GAPAAATAPAPTAHK.A                      |
| gi 5031973 ref NF  | 4                        | 12     | 0.177  | 440     | 48121   | 5.1     | U | protein disulfide isomerase-associated 6 [Homo sapiens]                            |      |                                            |
| *                  | HsHeLa_Control-MG_Ti_20  | 4.2606 | 0.2011 | 1387.23 | 1387.58 | 7010.7  | 1 | 2109.7                                                                             | 80.8 | 2 R.TGEAIVDAALSALR.Q                       |
| *                  | HsFLAG-Control_HeLa_NE   | 4.217  | 0.4432 | 1528.74 | 1528.75 | 9304.8  | 1 | 1356.3                                                                             | 67.9 | 5 K.LAAVDATVNQVLLASR.Y                     |
| *                  | HsHeLa_Control-MG_Ti_20  | 3.4434 | 0.1694 | 2638.52 | 2638.98 | 3612    | 1 | 252.9                                                                              | 37   | 4 R.ALDLFSNAPPELLEIINEDIAK.R               |
| *                  | Hs293FLP-MG_Ti_202.428   | 3.6775 | 0.3521 | 2759.44 | 2759.89 | 9218.6  | 1 | 1085.5                                                                             | 43.8 | 1 R.DGELPVEDDIDLSDELDDLGKDEL.-             |
| gi 4502491 ref NF  | 2                        | 12     | 0.177  | 282     | 31362   | 4.8     | U | complement component 1, q subcomponent binding protein precursor [Homo sapiens]    |      |                                            |
| *                  | Hs293FLP-MG_Ti_202.352   | 3.9469 | 0.2782 | 2287.58 | 2288.56 | 7379.4  | 1 | 1006.3                                                                             | 55.3 | 3 K.VEEQPELTSTPNFVVEVIK.N                  |
| *                  | Hs293FLP-MG_Ti_205.021   | 5.4861 | 0.4241 | 3442.19 | 3441.77 | 6610.3  | 1 | 1127.9                                                                             | 31   | 9 R.GVDNTFADELVELSTALEHQEYITFLEDLK.S       |
| gi 23510356 ref NF | 11                       | 22     | 0.176  | 568     | 65583   | 6.2     | U | RIO kinase 1 isoform 1 [Homo sapiens]                                              |      |                                            |
| *                  | HsFLAG-Control_MG_293_   | 2.5104 | 0.4057 | 1838.36 | 1838.84 | 2469.6  | 1 | 197.5                                                                              | 56.2 | 1 R.VVPGQFDDADSSDSEN.R                     |
| *                  | Hs293FLP-MG_Ti_203.212   | 4.1006 | 0.3812 | 1560.66 | 1560.79 | 8685.7  | 1 | 1065.4                                                                             | 65.4 | 1 K.LNVTDSVINKVTEK.S                       |
| *                  | HsFLAG-Control_293_Ti_20 | 3.1438 | 0.1535 | 1127.35 | 1128.27 | 5672.4  | 4 | 1571                                                                               | 88.9 | 1 R.ATVEQVLDPR.T                           |
| *                  | HsHeLa_Control-MG_Ti_20  | 4.291  | 0.3427 | 1607.56 | 1606.65 | 6753.1  | 1 | 1177.2                                                                             | 71.4 | 4 K.EANVYHASTANGES.R                       |
| *                  | HsFLAG-Control_MG_293_   | 1.9197 | 0.1308 | 999.6   | 1000.2  | 5172.5  | 6 | 308.5                                                                              | 68.8 | 1 R.HSVAVMTVR.E                            |
| *                  | Hs293FLP_Ti_302.1488.14  | 4.1936 | 0.2937 | 1421.45 | 1420.48 | 8369.5  | 1 | 1733.1                                                                             | 77.3 | 2 R.SSQDHVDEEVFK.R                         |
| *                  | HsFLAG-Control_293_Ti_20 | 2.8559 | 0.0989 | 1396.55 | 1397.57 | 4128.1  | 1 | 335.5                                                                              | 59.1 | 2 K.VPALLNQVEER.T                          |
| *                  | Hs293FLP-MG_Ti_103.191   | 2.0878 | 0.152  | 1396.73 | 1397.57 | 3828.2  | 1 | 231.9                                                                              | 54.5 | 1 K.VPALLNQVEER.T                          |
| *                  | HsFLAG-Control_293_Ti_20 | 3.7808 | 0.3028 | 1397.35 | 1397.57 | 7746.4  | 1 | 1863.1                                                                             | 90.9 | 2 K.VPALLNQVEER.T                          |
| *                  | Hs293FLP-MG_Ti_203.200   | 3.9443 | 0.3047 | 1397.66 | 1397.57 | 7861.3  | 1 | 1317.3                                                                             | 77.3 | 2 K.VPALLNQVEER.T                          |
| *                  | HsFLAG-Control_MG_293_   | 3.212  | 0.2687 | 1298.49 | 1298.44 | 7608.7  | 1 | 853.5                                                                              | 75   | 5 K.KHTTDPIDKK.E                           |
| gi 6631095 ref NF  | 10                       | 16     | 0.175  | 808     | 90981   | 5.8     | U | minichromosome maintenance protein 3 [Homo sapiens]                                |      |                                            |
| *                  | HsFLAG-Control_293_Ti_20 | 4.4297 | 0.3993 | 2193.65 | 2194.27 | 10145.6 | 1 | 1255.5                                                                             | 55.9 | 3 R.DYLDLDDDEEDQGIYQSK.V                   |
| *                  | HsGST-MOCK_Ti_403.402    | 3.6231 | 0.2626 | 4059.93 | 4059.43 | 7395.9  | 1 | 668.6                                                                              | 22.9 | 1 R.YSDLTTLVAFSPSSVYPTKDEENNPLETEYGLSVYK.D |
| *                  | HsFLAG-Control_293_Ti_20 | 4.0613 | 0.3336 | 1446.58 | 1446.59 | 6398.9  | 1 | 1387.6                                                                             | 79.2 | 3 R.SVDVILDDDLVDK.A                        |
| *                  | HsHeLa3_Ti_105.3382.338  | 2.7856 | 0.2419 | 1315.6  | 1314.58 | 6240.9  | 1 | 1246.7                                                                             | 77.3 | 1 K.AILCLLLGGVER.D                         |
| *                  | HsFLAG-Control_293_Ti_20 | 2.9884 | 0.1648 | 1528.31 | 1525.79 | 7376.9  | 2 | 882.3                                                                              | 60.7 | 1 R.GDINILLIGDPSVAK.S                      |
| *                  | HsFLAG-Control_MG_293_   | 3.0786 | 0.2776 | 1377.72 | 1378.54 | 9742.1  | 4 | 824.4                                                                              | 58.3 | 1 R.CSVLAAANPVYGR.Y                        |
| *                  | HsFLAG-Control_293_Ti_20 | 2.7218 | 0.2647 | 1034.48 | 1035.15 | 5137.2  | 1 | 561.9                                                                              | 75   | 1 K.HDNLLHGTK.K                            |
| *                  | HsGST-MOCK_Ti_103.103    | 3.1095 | 0.3229 | 1035.03 | 1035.15 | 7557.2  | 1 | 1540.1                                                                             | 93.8 | 2 K.HDNLLHGTK.K                            |
| *                  | HsFLAG-Control_MG_293_   | 3.1139 | 0.167  | 932.87  | 933.139 | 5518.8  | 1 | 1161.7                                                                             | 92.9 | 2 K.VALLDVFR.E                             |
| *                  | HsFLAG-Control_293_Ti_20 | 3.651  | 0.2884 | 1838.36 | 1837.98 | 7797.4  | 1 | 1161                                                                               | 62.5 | 1 R.DSEEPFSSVEIQAALSK.M                    |
| gi 17402900 ref NF | 7                        | 10     | 0.175  | 644     | 67560   | 7.6     | U | far upstream element-binding protein [Homo sapiens]                                |      |                                            |
| *                  | HsHeLa3_Ti_102.1659.166  | 4.0873 | 0.3895 | 1976.62 | 1975.04 | 6204.6  | 1 | 1132.4                                                                             | 52.6 | 1 K.IGGDAGTSLNSNDYGYGGQK.R                 |
| *                  | HsHeLa3_Ti_103.0878.087  | 3.4379 | 0.2489 | 1341.6  | 1341.42 | 5197.8  | 1 | 824.7                                                                              | 77.3 | 1 K.RPLEDGDQPDAK.K                         |
| *                  | HsHeLa3_Ti_104.2883.288  | 3.549  | 0.405  | 1262.74 | 1261.53 | 6066.3  | 1 | 1471.4                                                                             | 86.4 | 2 K.VPDGMVGFIGN.G                          |
| *                  | HsHeLa3_Ti_103.1575.157  | 3.8824 | 0.3118 | 1596.97 | 1596.76 | 5374.3  | 1 | 1129.6                                                                             | 75   | 2 R.SCMLTGTPEVQSAK.R                       |
| *                  | HsHeLa3_Ti_103.1991.199  | 3.1388 | 0.3687 | 1338.09 | 1337.52 | 6509.6  | 1 | 965.5                                                                              | 70.8 | 2 R.IGGNEGIDVPIPR.F                        |
| *                  | HsFLAG-MOCK_300mM_T      | 3.1528 | 0.1549 | 1505.03 | 1504.64 | 3218.5  | 4 | 458.7                                                                              | 66.7 | 1 R.IQFKPDDGTTPER.I                        |
| *                  | HsHeLa3_Ti_104.2572.257  | 3.0486 | 0.19   | 2910.37 | 2910.19 | 4357.7  | 1 | 347.7                                                                              | 38.9 | 1 K.MGQAVPAPTGAPPGQPDYSAAWAEYYR.Q          |
| gi 5730027 ref NF  | 10                       | 24     | 0.174  | 443     | 48227   | 8.7     | U | KH domain containing, RNA binding, signal transduction associated 1 [Homo sapiens] |      |                                            |
| *                  | HsFLAG-Control_HeLa_NE   | 4.0567 | 0.4145 | 1385.35 | 1385.49 | 4987.8  | 1 | 980.2                                                                              | 69.2 | 6 R.SGSMDPSGAHPSVR.Q                       |
| *                  | HsFLAG-Control_HeLa_NE   | 3.7115 | 0.4349 | 2246.27 | 2247.53 | 6300.3  | 1 | 499.2                                                                              | 47.4 | 4 K.DSLDPSFTHAMQLLTAEIK.I                  |
| *                  | HsFLAG-MOCK_300mM_T      | 3.1378 | 0.3135 | 2510.15 | 2510.72 | 7782.3  | 1 | 730                                                                                | 45   | 1 K.IQKGDSSKDDDEENYLDLFSHK.N               |

|                   |                         |        |        |         |         |         |   |        |      |                                                                |
|-------------------|-------------------------|--------|--------|---------|---------|---------|---|--------|------|----------------------------------------------------------------|
| *                 | HsFLAG-Control_HeLa_NE  | 3.6113 | 0.3061 | 2140.37 | 2141.26 | 10316.7 | 1 | 1876.4 | 61.8 | 1 K.GDSKKDDEENYLDFSHK.N                                        |
| *                 | HsFLAG-Control_HeLa_NE  | 4.4611 | 0.3457 | 1753.96 | 1753.86 | 9626    | 1 | 1862.8 | 76.9 | 4 K.KDDEENYLDFSHK.N                                            |
| *                 | HsFLAG-Control_HeLa_NE  | 3.831  | 0.1647 | 1754    | 1753.86 | 6088.7  | 2 | 1041.2 | 50   | 2 K.KDDEENYLDFSHK.N                                            |
| *                 | HsFLAG-Control_HeLa_NE  | 3.8816 | 0.2599 | 1626.23 | 1625.69 | 7626.2  | 1 | 1150.4 | 70.8 | 2 K.DDEENYLDFSHK.N                                             |
| *                 | HsFLAG-MOCK_300mM_T     | 3.5951 | 0.2941 | 1470.49 | 1470.8  | 8215.4  | 1 | 1104.8 | 72.7 | 2 K.ERVLIPVKQYPK.F                                             |
| *                 | HsFLAG-Control_HeLa_NE  | 2.2158 | 0.1375 | 1040.59 | 1041.24 | 6188.4  | 3 | 481.3  | 66.7 | 1 K.ILGPQGNTIK.R                                               |
| *                 | HsFLAG-Control_HeLa_NE  | 3.0714 | 0.2469 | 1041.43 | 1041.24 | 3570.5  | 1 | 676.4  | 88.9 | 1 K.ILGPQGNTIK.R                                               |
| gi 4506715 ref NF |                         | 1      | 3      | 0.174   | 69      | 7841    |   |        |      | ribosomal protein S28 [Homo sapiens]                           |
| gi 89042507 ref X |                         | 1      | 3      | 0.108   | 111     | 12494   |   |        |      | PREDICTED: similar to 40S ribosomal protein S28 [Homo sapiens] |
| gi 89035017 ref X |                         | 1      | 3      | 0.174   | 69      | 7841    |   |        |      | PREDICTED: similar to 40S ribosomal protein S28 [Homo sapiens] |
| gi 89034184 ref X |                         | 1      | 3      | 0.174   | 69      | 7841    |   |        |      | PREDICTED: similar to 40S ribosomal protein S28 [Homo sapiens] |
| gi 88959151 ref X |                         | 1      | 3      | 0.174   | 69      | 7841    |   |        |      | PREDICTED: similar to 40S ribosomal protein S28 [Homo sapiens] |
| gi 88953906 ref X |                         | 1      | 3      | 0.174   | 69      | 7841    |   |        |      | PREDICTED: similar to 40S ribosomal protein S28 [Homo sapiens] |
|                   | HsFLAG-Control_HeLa_NE  | 3.6798 | 0.2664 | 1361.94 | 1361.49 | 7595.4  | 1 | 1219.8 | 72.7 | 3 R.EGDVLTLESER.E                                              |
| gi 4507645 ref NF |                         | 3      | 5      | 0.173   | 249     | 26669   |   |        |      | triosephosphate isomerase 1 [Homo sapiens]                     |
| *                 | HsHeLa3_Ti_103.2759.275 | 4.2162 | 0.4302 | 2193.9  | 2193.43 | 4020.7  | 1 | 836.2  | 63.2 | 2 K.VPADTEVVCAPPTAYIDFAR.Q                                     |
| *                 | HsHeLa3_Ti_103.1360.136 | 1.9764 | 0.1532 | 1137.57 | 1138.28 | 4879.9  | 4 | 357    | 61.1 | 1 K.IAVAAQCNCYK.V                                              |
| *                 | Hs293FLP_TREX_Ti_103.1  | 4.2668 | 0.4557 | 1459.37 | 1459.6  | 3351.5  | 1 | 831.4  | 83.3 | 2 R.HVFGESDELIGQK.V                                            |
| gi 71361682 ref N |                         | 25     | 51     | 0.172   | 2115    | 238257  |   |        |      | nuclear mitotic apparatus protein 1 [Homo sapiens]             |
| *                 | HsFLAG-Control_HeLa_NE  | 3.542  | 0.3077 | 1353.42 | 1353.52 | 4894.7  | 1 | 1044.2 | 86.4 | 1 R.IHGTEEGQQLK.Q                                              |
| *                 | HsGST-MOCK_Ti_102.137   | 3.1822 | 0.2526 | 1440.53 | 1440.56 | 4891.2  | 1 | 594.5  | 70.8 | 1 K.HPSSPECLVSAQK.V                                            |
| *                 | HsGST-MOCK_Ti_105.274   | 4.377  | 0.3664 | 2838.34 | 2838.11 | 8832.1  | 1 | 1040.4 | 32.6 | 1 K.LREFASHLQQLDALNELTEEHSK.A                                  |
| *                 | HsFLAG-MOCK_300mM_T     | 4.2785 | 0.3316 | 2569.78 | 2568.76 | 7311.5  | 1 | 1134.6 | 38.1 | 1 R.EFASHLQQLDALNELTEEHSK.A                                    |
| *                 | HsFLAG-Control_HeLa_NE  | 4.0583 | 0.3222 | 2262.97 | 2262.52 | 9592.8  | 1 | 785.3  | 42.5 | 2 K.QQLSSLITDLQSSISNLSQAK.E                                    |
| *                 | HsFLAG-Control_HeLa_NE  | 5.3232 | 0.387  | 3186.06 | 3187.57 | 8302.3  | 1 | 1424.1 | 32.8 | 4 R.LTAQVASLTSELTTLNATIQQDQELAGLK.Q                            |
| *                 | HsFLAG-Control_HeLa_NE  | 2.6755 | 0.147  | 1256.02 | 1256.4  | 6470.9  | 2 | 830.3  | 80   | 1 R.HQVEQLSSSLK.Q                                              |
| *                 | HsFLAG-Control_HeLa_NE  | 2.3132 | 0.0876 | 1256.55 | 1256.4  | 2553.2  | 3 | 153.7  | 65   | 1 R.HQVEQLSSSLK.Q                                              |
| *                 | HsFLAG-Control_HeLa_NE  | 4.5955 | 0.369  | 1753.65 | 1754    | 9526.3  | 1 | 2060.9 | 75   | 2 K.LEILQQQLQVANEAR.D                                          |
| *                 | HsFLAG-Control_HeLa_NE  | 2.8455 | 0.1283 | 1824.15 | 1823.02 | 10172   | 2 | 652.3  | 50   | 1 R.LQQLGEAHQAETEVLR.R                                         |
| *                 | Hs293FLP-MG_Ti_203.401  | 3.2307 | 0.3401 | 1871.21 | 1872.13 | 9664.7  | 1 | 1305.1 | 59.4 | 1 R.VEFATLQEALAHALTEK.E                                        |
| *                 | HsFLAG-Control_HeLa_NE  | 4.8382 | 0.2933 | 1561.82 | 1561.69 | 7607.8  | 1 | 2113.1 | 80.8 | 6 R.DSALETLQGQLEEK.A                                           |
| *                 | HsFLAG-Control_HeLa_NE  | 4.9966 | 0.4834 | 1655.65 | 1654.78 | 8400.4  | 1 | 1885.3 | 73.3 | 3 K.AQELGHSQSALASAQR.E                                         |
| *                 | HsFLAG-Control_HeLa_NE  | 5.2004 | 0.3141 | 1804.21 | 1804.01 | 7833.3  | 1 | 2509.6 | 80   | 2 K.NSLISSEEEVSILNR.Q                                          |
| *                 | HsHeLa3_Ti_103.1299.129 | 4.1032 | 0.3781 | 1263.69 | 1261.38 | 8204.4  | 1 | 1744.5 | 86.4 | 8 R.LLQAETASNSAR.A                                             |
| *                 | HsGST-MOCK_Ti_305.171   | 5.0743 | 0.438  | 1725.11 | 1725.87 | 7900.2  | 1 | 1819.2 | 82.1 | 3 K.HLCQQLQAEQAAAEK.R                                          |
| *                 | HsFLAG-Control_HeLa_NE  | 2.8024 | 0.2413 | 1193.58 | 1194.38 | 6538.8  | 1 | 574.7  | 60   | 1 R.LGHELQQAGLK.T                                              |
| *                 | HsFLAG-Control_HeLa_NE  | 2.8231 | 0.2005 | 1194.25 | 1194.38 | 5589.8  | 1 | 809.4  | 75   | 2 R.LGHELQQAGLK.T                                              |
| *                 | HsGST-MOCK_Ti_304.314   | 6.3241 | 0.5124 | 3516.46 | 3516.85 | 9676.2  | 1 | 1833.8 | 31.5 | 2 K.SREPQAKPQLDLSIDSLDLSCEEGTPLSITSK.L                         |
| *                 | HsFLAG-Control_HeLa_NE  | 4.2015 | 0.4378 | 2159    | 2158.55 | 11359.5 | 1 | 1274.5 | 52.8 | 2 R.LPPKVESLESLYFTPIPAR.S                                      |
| *                 | HsFLAG-Control_HeLa_NE  | 3.7341 | 0.4232 | 2193.63 | 2194.36 | 9921.9  | 1 | 951.8  | 47.5 | 1 R.SQAPLESSLDSLGDVFLDSEGR.K                                   |
| *                 | HsFLAG-MOCK_300mM_T     | 3.5639 | 0.2502 | 2047.12 | 2046.16 | 3203.5  | 1 | 753    | 67.6 | 1 K.KLDVEEPDSANSSFYSTR.S                                       |
| *                 | HsHeLa3_Ti_106.1720.172 | 2.9177 | 0.292  | 1328.76 | 1327.44 | 5948.5  | 1 | 906.4  | 73.1 | 1 R.RSQAGVSSGAPPGR.N                                           |
| *                 | HsGST-MOCK_Ti_104.128   | 4.0043 | 0.3911 | 1719.52 | 1719.9  | 8064.5  | 3 | 757    | 56.7 | 2 K.RVSLEPHQGGPTPEK.K                                          |
| *                 | HsFLAG-Control_HeLa_NE  | 3.0007 | 0.2198 | 1563.6  | 1563.71 | 6669.6  | 1 | 528.9  | 53.6 | 1 R.VSLEPHQGGPTPEK.K                                           |
| gi 89062143 ref X |                         | 5      | 9      | 0.172   | 430     | 47445   |   |        |      | PREDICTED: similar to Ig gamma-4 chain C region [Homo sapiens] |
| *                 | HsHeLa3_Ti_106.2298.229 | 2.9503 | 0.2269 | 1288.79 | 1288.46 | 3622.9  | 8 | 436.8  | 63.6 | 1 K.GPSVFPLAPCSR.S                                             |
| *                 | HsHeLa3_Ti_103.1803.180 | 4.0268 | 0.3434 | 1426.13 | 1424.56 | 8008.5  | 1 | 1242.1 | 69.2 | 1 R.STSESTAALGCLVK.D                                           |
| *                 | HsHeLa3_Ti_106.2848.285 | 3.5599 | 0.1238 | 1807.18 | 1809.12 | 6064.8  | 1 | 918.8  | 60   | 1 R.VVSVLTVLHQDWLNGK.E                                         |
| *                 | HsHeLa3_Ti_103.1878.187 | 2.5117 | 0.1298 | 1161.73 | 1162.34 | 4608.6  | 9 | 333.8  | 66.7 | 1 K.NQVSLTCLVK.G                                               |

|                   |                          |        |        |         |         |        |      |        |      |    |                                                                 |
|-------------------|--------------------------|--------|--------|---------|---------|--------|------|--------|------|----|-----------------------------------------------------------------|
| gi 38201710 ref N | HsHeLa3_Ti_102.3109.310  | 3.9392 | 0.2322 | 2545.91 | 2545.68 | 7147   | 1    | 1278.7 | 54.8 | 5  | K.GFYPSDIAVEWESNGQPENNYK.T                                      |
| *                 |                          | 12     | 50     | 0.171   | 729     | 80273  | 8.3  | U      |      |    | DEAD box polypeptide 17 isoform p82 [Homo sapiens]              |
| *                 | HsGST-MOCK_Ti_103.193    | 3.5467 | 0.2944 | 1520.57 | 1520.77 | 8941.2 | 1    | 1254.7 | 72.7 | 2  | K.KWDLSELPKFEK.N                                                |
| *                 | HsGST-MOCK_Ti_103.193    | 3.9635 | 0.1962 | 1521.99 | 1520.77 | 5332.3 | 1    | 1687.8 | 65.9 | 1  | K.KWDLSELPKFEK.N                                                |
| *                 | HsGST-MOCK_Ti_303.265    | 3.6573 | 0.1954 | 1369.44 | 1369.57 | 7837.3 | 7    | 895.4  | 58.3 | 6  | R.GDGPICLV LAPTR.E                                              |
| *                 | HsFLAG-Control_HeLa_NE   | 4.7057 | 0.3663 | 1692.68 | 1692.82 | 7858.2 | 1    | 1737.2 | 71.4 | 7  | R.ELAQQVQQVADDDYK.C                                             |
| *                 | HsFLAG-Control_HeLa_NE   | 1.8359 | 0.1012 | 1053.37 | 1054.15 | 7559.8 | 5    | 566    | 66.7 | 1  | K.STCIYGGAPK.G                                                  |
| *                 | HsGST-MOCK_Ti_303.267    | 3.1278 | 0.2572 | 1337.33 | 1337.6  | 5377.8 | 1    | 865.1  | 80   | 2  | R.MLDMGFEPQIR.K                                                 |
| *                 | HsFlag1P_Ti_104.2210.221 | 4.2007 | 0.3247 | 1227.42 | 1227.45 | 6635   | 1    | 1668.4 | 86.4 | 19 | K.APILIATDVASR.G                                                |
| *                 | HsFlag1P_Ti_104.2894.289 | 4.5794 | 0.3974 | 2082.79 | 2083.39 | 6206.5 | 1    | 939.4  | 55.3 | 4  | K.APILIATDVASRGLDVEDVK.F                                        |
| *                 | HsFLAG-Control_HeLa_NE   | 2.6493 | 0.2241 | 874.56  | 874.966 | 7540.7 | 5    | 774.8  | 78.6 | 1  | R.GLDVEDVK.F                                                    |
| *                 | HsGST-MOCK_Ti_303.233    | 3.3671 | 0.2812 | 2118.67 | 2119.25 | 5168.5 | 1    | 467.1  | 50   | 1  | K.FVINYDYPNSEDYVHR.I                                            |
| *                 | HsFLAG-Control_MG_293_   | 3.8601 | 0.427  | 1417.71 | 1417.6  | 7369.4 | 1    | 1180.8 | 70.8 | 5  | K.GTAYTFFTPGNLQ.K                                               |
| *                 | HsFLAG-Control_HeLa_NE   | 3.7084 | 0.3561 | 1456.27 | 1456.51 | 9318.2 | 1    | 1233.7 | 65.4 | 1  | R.SSQSSSQFSGIGR.S                                               |
| gi 4502643 ref NF |                          | 7      | 45     | 0.171   | 531     | 58024  | 6.7  | U      |      |    | chaperonin containing TCP1, subunit 6A isoform a [Homo sapiens] |
| *                 | HsFLAG-Control_HeLa_S1(  | 5.4594 | 0.4244 | 2545.32 | 2545.85 | 8401.4 | 1    | 1334.7 | 47.9 | 14 | K.VATAQDDITGDGTTSNVLIIGELLK.Q                                   |
| *                 | HsFLAG-Control_HeLa_S1(  | 6.8988 | 0.492  | 2206.72 | 2207.57 | 7755.3 | 1    | 2378.2 | 70   | 5  | K.VHAELADVLTEAVVDSILAIAK.K                                      |
| *                 | HsFLAG-Control_HeLa_S1(  | 4.2557 | 0.2912 | 2207.9  | 2207.57 | 7718.5 | 3    | 905.2  | 33.8 | 1  | K.VHAELADVLTEAVVDSILAIAK.K                                      |
| *                 | Hs293FLP_Ti_306.4003.40  | 4.2625 | 0.3443 | 2208.26 | 2207.57 | 7837.1 | 1    | 1103   | 50   | 1  | K.VHAELADVLTEAVVDSILAIAK.K                                      |
| *                 | HsFLAG-Control_HeLa_S1(  | 2.9141 | 0.184  | 1264.25 | 1263.43 | 6367.5 | 1    | 1051   | 77.3 | 2  | K.GIDPFSLDALSKE                                                 |
| *                 | HsFLAG-Control_HeLa_NE   | 4.8851 | 0.3477 | 1770.01 | 1769.14 | 6623.7 | 1    | 1756.6 | 71.9 | 12 | R.AQLGVQAFADALLIIPK.V                                           |
| *                 | HsFLAG-Control_HeLa_NE   | 4.6981 | 0.4435 | 1763.63 | 1763    | 7618.5 | 1    | 1684   | 73.3 | 10 | K.VLAQNSGFDLQETLVK.I                                            |
| gi 20070125 ref N |                          | 5      | 10     | 0.171   | 508     | 57116  | 4.9  | U      |      |    | prolyl 4-hydroxylase, beta subunit [Homo sapiens]               |
| *                 | HsFLAG-Control_Hela_Ti_1 | 5.0771 | 0.3054 | 2936.99 | 2937.27 | 9229.3 | 1    | 1711.4 | 31   | 2  | R.TGPAATTLPGAAAESLVESSEVAVIGFFK.D                               |
| *                 | Hs293FLP-MG_Ti_202.454   | 2.8122 | 0.2801 | 2714.68 | 2714.99 | 5719.5 | 1    | 401.6  | 37.5 | 1  | K.QFLQAAEIDDIPFGITSNSDVFSK.Y                                    |
| *                 | HsHeLa_Control-MG_Ti_20  | 3.5425 | 0.325  | 1965.38 | 1966.24 | 6084.4 | 1    | 921.2  | 62.5 | 2  | K.HNQLPLVIEFTEQTAPK.I                                           |
| *                 | HsHeLa_Control-MG_Ti_20  | 5.0161 | 0.3739 | 1966.3  | 1966.24 | 5651   | 1    | 1202   | 46.9 | 2  | K.HNQLPLVIEFTEQTAPK.I                                           |
| *                 | HsHeLa_Control-MG_Ti_20  | 4.1992 | 0.372  | 1833.98 | 1835.03 | 8888.2 | 1    | 2415.6 | 78.6 | 3  | K.ILFIFIDSDHTDNQR.I                                             |
| gi 16579885 ref N |                          | 14     | 37     | 0.171   | 427     | 47697  | 11.1 | U      |      |    | ribosomal protein L4 [Homo sapiens]                             |
| *                 | Hs293FLP_TREX_Ti_103.2   | 2.3791 | 0.1648 | 988.41  | 989.203 | 4738.9 | 1    | 536.7  | 75   | 2  | K.NVTLPVAVFK.A                                                  |
| *                 | Hs293FLP_TREX_Ti_106.2   | 3.9795 | 0.3025 | 1762.58 | 1762.97 | 6274.2 | 1    | 1156.3 | 67.9 | 4  | R.RGPCIYINEDNGIIK.A                                             |
| *                 | HsGST-MOCK_Ti_303.223    | 3.1785 | 0.184  | 1607.34 | 1606.78 | 6018.9 | 1    | 793    | 65.4 | 1  | R.GPCIYINEDNGIIK.A                                              |
| *                 | HsFLAG-Control_293_Ti_2( | 3.0543 | 0.2832 | 1270    | 1269.53 | 3215   | 1    | 427.1  | 72.7 | 5  | R.NIPGITLLNVSK.L                                                |
| *                 | Hs293FLP_TREX_Ti_105.1   | 3.0873 | 0.1897 | 1281.4  | 1281.45 | 7000.5 | 1    | 1102.4 | 77.8 | 2  | R.KLDELYGTWR.K                                                  |
| *                 | HsFLAG-Control_293_Ti_2( | 2.1849 | 0.1272 | 956.33  | 957.118 | 7948.8 | 1    | 825.3  | 70   | 1  | K.AAAAAAALQAK.S                                                 |
| *                 | Hs293FLP_TREX_Ti_102.1   | 2.617  | 0.1118 | 956.43  | 957.118 | 8836.6 | 1    | 1421.6 | 75   | 2  | K.AAAAAAALQAK.S                                                 |
| *                 | Hs293FLP-MG_Ti_102.135   | 2.0988 | 0.1262 | 956.48  | 957.118 | 7657.2 | 1    | 906.4  | 65   | 2  | K.AAAAAAALQAK.S                                                 |
| *                 | HsFLAG-Control_293_Ti_2( | 4.4872 | 0.1236 | 957.09  | 957.118 | 8189.6 | 1    | 2394.4 | 95   | 4  | K.AAAAAAALQAK.S                                                 |
| *                 | Hs293FLP-MG_Ti_102.134   | 4.4588 | 0.086  | 957.52  | 957.118 | 6768.5 | 1    | 2233.4 | 95   | 4  | K.AAAAAAALQAK.S                                                 |
| *                 | Hs293FLP_TREX_Ti_102.1   | 4.4473 | 0.1056 | 958.31  | 957.118 | 7312.8 | 1    | 2347.7 | 95   | 2  | K.AAAAAAALQAK.S                                                 |
| *                 | HsHeLa_Control-MG_Ti_10  | 4.2754 | 0.0949 | 958.55  | 957.118 | 7408.5 | 1    | 2461.2 | 95   | 4  | K.AAAAAAALQAK.S                                                 |
| *                 | Hs293FLP_TREX_Ti_103.1   | 5.4018 | 0.3601 | 1416.48 | 1416.57 | 7654.8 | 1    | 2204.6 | 82.1 | 2  | K.AAAAAAALQAKSDEK.A                                             |
| *                 | Hs293FLP_TREX_Ti_106.2   | 2.9032 | 0.2376 | 1125.71 | 1125.4  | 7089.2 | 5    | 1071.7 | 72.7 | 2  | K.AAVAGKKPVVGK.K                                                |
| gi 31563378 ref N |                          | 3      | 6      | 0.171   | 245     | 26599  | 4.7  | U      |      |    | integrin beta 4 binding protein isoform a [Homo sapiens]        |
| gi 4504771 ref NF |                          | 3      | 6      | 0.171   | 245     | 26599  | 4.7  | U      |      |    | integrin beta 4 binding protein isoform a [Homo sapiens]        |
| *                 | HsHeLa_Control-MG_Ti_20  | 3.3618 | 0.2903 | 2085.63 | 2086.32 | 5039.7 | 1    | 405.4  | 50   | 1  | R.HGLLVPNNTTDQELQHIR.N                                          |
| *                 | HsHeLa_Control-MG_Ti_20  | 3.9255 | 0.3393 | 2086.66 | 2086.32 | 7096   | 1    | 1526.6 | 48.5 | 1  | R.HGLLVPNNTTDQELQHIR.N                                          |
| *                 | HsFLAG-MOCK_300mM_T      | 4.304  | 0.3784 | 2585.21 | 2585.87 | 6197.5 | 1    | 597.3  | 43.5 | 4  | K.TSIEDQDELSSLLQVPLVAGTVNR.G                                    |
| gi 15431288 ref N |                          | 3      | 6      | 0.171   | 217     | 24831  | 9.9  | U      |      |    | ribosomal protein L10a [Homo sapiens]                           |

|                    |                          |        |        |         |         |         |   |        |      |    |                                                             |
|--------------------|--------------------------|--------|--------|---------|---------|---------|---|--------|------|----|-------------------------------------------------------------|
| *                  | Hs293FLP_TREX_Ti_103.1   | 4.0776 | 0.3762 | 1893.23 | 1893.98 | 5985    | 1 | 1105   | 70   | 3  | K.FSVCVLGDQQHCDEAK.A                                        |
|                    | HsGST-MOCK_Ti_303.268    | 2.7753 | 0.1705 | 1452.89 | 1452.71 | 3831.3  | 1 | 607.5  | 75   | 1  | K.AVDIPHMDIEALK.K                                           |
| *                  | HsFLAG-Control_293_Ti_20 | 2.2737 | 0.1007 | 811.49  | 812     | 4830.2  | 1 | 633    | 85.7 | 2  | R.ILGPGLNK.A                                                |
| gi 4502201 ref NF  |                          | 2      | 4      | 0.171   | 181     | 20697   |   |        |      |    | ADP-ribosylation factor 1 [Homo sapiens]                    |
| gi 66879664 ref NF |                          | 2      | 4      | 0.171   | 181     | 20697   |   |        |      |    | ADP-ribosylation factor 1 [Homo sapiens]                    |
| gi 66879662 ref NF |                          | 2      | 4      | 0.171   | 181     | 20697   |   |        |      |    | ADP-ribosylation factor 1 [Homo sapiens]                    |
| gi 66879660 ref NF |                          | 2      | 4      | 0.171   | 181     | 20697   |   |        |      |    | ADP-ribosylation factor 1 [Homo sapiens]                    |
| gi 4502209 ref NF  |                          | 2      | 4      | 0.172   | 180     | 20530   |   |        |      |    | ADP-ribosylation factor 5 [Homo sapiens]                    |
| gi 4502203 ref NF  |                          | 2      | 4      | 0.171   | 181     | 20601   |   |        |      |    | ADP-ribosylation factor 3 [Homo sapiens]                    |
|                    | HsFLAG-Control_HeLa_NE   | 2.8325 | 0.2149 | 2323.54 | 2324.68 | 4710.8  | 2 | 276.2  | 37.5 | 2  | K.LGEIVTTIPTIGFNVETVEYK.N                                   |
|                    | Hs293FLP_TREX_Ti_105.2   | 2.9605 | 0.2248 | 1091.96 | 1090.31 | 6960.4  | 4 | 1003.9 | 77.8 | 2  | R.DAVLLVFANK.Q                                              |
| gi 13128992 ref NF |                          | 3      | 3      | 0.17    | 176     | 18419   |   |        |      |    | hypothetical protein MGC2803 [Homo sapiens]                 |
| *                  | HsGST-MOCK_Ti_405.204    | 1.9613 | 0.1931 | 1106.4  | 1107.25 | 5770    | 9 | 330.4  | 54.5 | 1  | K.GGPGSTLSFVGK.R                                            |
| *                  | HsGST-MOCK_Ti_405.204    | 2.9747 | 0.3624 | 1106.95 | 1107.25 | 6468.1  | 1 | 882.5  | 72.7 | 1  | K.GGPGSTLSFVGK.R                                            |
| *                  | HsFLAG-MOCK_300mM_T      | 2.737  | 0.1821 | 2036.83 | 2035.26 | 8538.5  | 1 | 630.6  | 47.1 | 1  | K.KQKTEDEVLTSGDAWAK.Y                                       |
| gi 4507195 ref NF  |                          | 25     | 67     | 0.168   | 2364    | 274630  |   |        |      |    | spectrin, beta, non-erythrocytic 1 isoform 1 [Homo sapiens] |
|                    | HsHeLa_Control-MG_Ti_20  | 3.6659 | 0.4837 | 1978.91 | 1979.16 | 6118.1  | 1 | 623.6  | 56.2 | 1  | K.TAGYPNVNIHNFTTSWR.D                                       |
|                    | HsHeLa_Control-MG_Ti_10  | 5.7495 | 0.4072 | 2485.89 | 2484.73 | 9319.6  | 1 | 2418.5 | 41.7 | 2  | K.SNAHYNLQNAFNLAEQHLGLTK.L                                  |
|                    | HsFLAG-Control_HeLa_NE   | 3.7666 | 0.3027 | 1722.39 | 1722.85 | 9166.6  | 1 | 1270.8 | 67.9 | 1  | K.LLDPEDISVDHPDEK.S                                         |
|                    | HsHeLa_Control-MG_Ti_20  | 5.4697 | 0.4777 | 2185.36 | 2185.45 | 9125.3  | 1 | 1788.4 | 61.1 | 14 | K.FANSLVGVQQQLQAFNTYR.T                                     |
|                    | HsFLAG-Control_HeLa_NE   | 4.0704 | 0.2917 | 2022.17 | 2023.25 | 6167.4  | 2 | 812.1  | 55.6 | 6  | R.LVSQDNFGFDLPAVEAATK.K                                     |
|                    | HsHeLa_Control-MG_Ti_10  | 3.7671 | 0.2724 | 1265.71 | 1265.5  | 3580.7  | 1 | 901.9  | 85   | 2  | K.HLLGVEDLLQK.H                                             |
|                    | HsFLAG-Control_HeLa_NE   | 4.6418 | 0.42   | 2052.36 | 2052.2  | 7628.2  | 1 | 1247.7 | 61.1 | 3  | K.IVSSSDVGHDEYSTQSLVK.K                                     |
|                    | HsFlag1P_Ti_104.3099.309 | 4.6181 | 0.357  | 2319.54 | 2320.53 | 8608.8  | 1 | 1093   | 50   | 3  | K.DALLSALSQNYHLECNETK.S                                     |
|                    | HsFlag1P_Ti_105.3421.342 | 3.2246 | 0.3661 | 1893.32 | 1894.19 | 5548.6  | 1 | 487.8  | 50   | 1  | R.LAEISDVVEEMKTTLK.N                                        |
|                    | Hs293FLP_Ti_304.1261.12  | 2.8291 | 0.1554 | 1097.19 | 1096.27 | 5622.2  | 2 | 662.6  | 75   | 1  | K.LLTQHENIK.N                                               |
|                    | HsFlag1P_Ti_105.2266.226 | 4.3426 | 0.3537 | 1524.63 | 1525.7  | 7652.4  | 1 | 1878.3 | 83.3 | 1  | R.LQALDTGWNELHK.M                                           |
|                    | HsHeLa_Control-MG_Ti_20  | 3.6898 | 0.2976 | 1833.69 | 1834.05 | 2820.9  | 1 | 394.7  | 64.3 | 2  | R.QNLLSQSHAYQQFLR.D                                         |
|                    | HsFlag1P_Ti_104.3259.325 | 4.3457 | 0.2628 | 1923.48 | 1924.13 | 10090.5 | 1 | 2857.4 | 82.1 | 2  | K.FLQDCQELSLWINEK.M                                         |
|                    | HsFLAG-Control_HeLa_NE   | 4.6725 | 0.4922 | 1888.6  | 1889.03 | 7770.9  | 1 | 1589.2 | 68.8 | 2  | K.EIEELQSQAQALSQEGK.S                                       |
|                    | HsHeLa_Control-MG_Ti_20  | 1.8772 | 0.1552 | 943.45  | 944.038 | 2530.1  | 2 | 138    | 75   | 1  | K.EIHQFNR.D                                                 |
|                    | HsFlag1P_Ti_105.3208.320 | 3.0756 | 0.285  | 1616.06 | 1615.87 | 4785.3  | 1 | 489.1  | 66.7 | 2  | K.QLWGLLIEETEKR.H                                           |
|                    | HsHeLa_Control-MG_Ti_10  | 5.1985 | 0.4872 | 2340.67 | 2339.57 | 7669.4  | 1 | 1832.9 | 46.1 | 2  | K.HQILEQAVEDYAETVHQLSK.T                                    |
|                    | HsHeLa_Control-MG_Ti_20  | 2.8857 | 0.3354 | 1312.78 | 1311.39 | 8336.7  | 7 | 704.3  | 63.6 | 1  | R.ALVADSHPESEI                                              |
|                    | HsFlag1P_Ti_105.2024.202 | 3.8258 | 0.2344 | 1375.09 | 1374.58 | 6821.1  | 3 | 1293.7 | 77.3 | 1  | R.TQILAASYELHK.F                                            |
|                    | HsFlag1P_Ti_104.3489.348 | 3.4352 | 0.2274 | 2092.66 | 2093.3  | 9625.2  | 2 | 869.7  | 47.2 | 4  | R.DASVAEAWLLGQEPYLSSE.E                                     |
| *                  | HsFLAG-Control_HeLa_Ti_1 | 3.5219 | 0.383  | 1368.11 | 1368.58 | 7487.6  | 1 | 1376.8 | 73.1 | 3  | K.TALPAQSAATLPAR.T                                          |
| *                  | HsFLAG-Control_HeLa_S10  | 3.4515 | 0.2897 | 1756.37 | 1757    | 4137.1  | 1 | 450.3  | 53.1 | 7  | K.TAASGIPYHSEVPVSLK.E                                       |
| *                  | HsHeLa_Control-MG_Ti_10  | 2.8587 | 0.1137 | 2243.78 | 2241.39 | 6661.5  | 2 | 558.3  | 44.7 | 1  | K.DDEEMNTWQAISSAISSEK.H                                     |
| *                  | HsHeLa_Control-MG_Ti_20  | 4.6103 | 0.5059 | 1545.3  | 1545.61 | 8109.4  | 1 | 1939.8 | 78.6 | 1  | K.HEVASTQSTPASSR.A                                          |
| *                  | Hs293FLP_Ti_304.1842.18  | 4.1563 | 0.4432 | 2061.45 | 2060.31 | 5040.3  | 1 | 593.4  | 50   | 3  | R.AQTLPTS SVVITSESSPGKR.E                                   |
| gi 24432106 ref NF |                          | 9      | 19     | 0.168   | 923     | 102902  |   |        |      |    | p30 DBC protein [Homo sapiens]                              |
| gi 40548408 ref NF |                          | 9      | 19     | 0.168   | 923     | 102902  |   |        |      |    | p30 DBC protein [Homo sapiens]                              |
|                    | HsHeLa3_Ti_104.2023.202  | 3.4473 | 0.299  | 1588.6  | 1586.79 | 4214.6  | 1 | 589.2  | 60.7 | 2  | K.AAYNPGQAVPWNNAVK.V                                        |
|                    | HsFLAG-Control_HeLa_S10  | 3.7552 | 0.4418 | 1499.24 | 1499.8  | 4270.1  | 1 | 634.7  | 67.9 | 2  | K.SPAPLLHVAALGQK.Q                                          |
|                    | HsFLAG-Control_HeLa_NE   | 4.3456 | 0.386  | 2165.78 | 2164.24 | 5158.4  | 1 | 986.8  | 59.5 | 3  | K.EAAPDAGAEPITADSDPAYSSK.V                                  |
|                    | HsHeLa3_Ti_103.3115.311  | 3.9656 | 0.3035 | 1591.8  | 1589.87 | 4532.7  | 1 | 733.7  | 69.2 | 3  | K.VLLLSSPGLEELYR.C                                          |
|                    | HsFLAG-Control_HeLa_S10  | 4.0825 | 0.3696 | 1550.13 | 1550.76 | 6000    | 1 | 779.4  | 66.7 | 4  | R.FAEFQYLQPGPPR.R                                           |
|                    | HsFLAG-Control_HeLa_S10  | 3.6761 | 0.3138 | 3383.19 | 3382.49 | 6716.6  | 5 | 370.8  | 21.9 | 1  | K.AEAAPPTQEAQGETEPTAQAPDALEQAADTSR.R                        |

|                   |                          |        |        |         |         |         |      |        |      |                                                                             |
|-------------------|--------------------------|--------|--------|---------|---------|---------|------|--------|------|-----------------------------------------------------------------------------|
|                   | HsFLAG-Control_HeLa_NE   | 4.0821 | 0.3522 | 2605.58 | 2605.95 | 6360.3  | 1    | 704.4  | 43.8 | 1 R.QEGLDGGLPEEVVLFGNLDLPPPGK.S                                             |
|                   | HsFLAG-Control_HeLa_NE   | 3.6456 | 0.2393 | 2606.52 | 2605.95 | 7541.2  | 1    | 784.1  | 29.2 | 1 R.QEGLDGGLPEEVVLFGNLDLPPPGK.S                                             |
|                   | HsHeLa3_Ti_106.2486.248  | 5.0062 | 0.4229 | 1880.04 | 1879.17 | 8411.9  | 1    | 1467.6 | 61.8 | 2 K.ALVSHNGSLINVGSLLR.A                                                     |
| gi 72534660 ref N |                          | 3      | 21     | 0.168   | 238     | 27367   | 11.8 | U      |      | splicing factor, arginine/serine-rich 7, 35kDa [Homo sapiens]               |
| *                 | Hs293FLP_TREX_Ti_104.1   | 4.3143 | 0.404  | 1720.47 | 1720.92 | 6469.5  | 1    | 775.3  | 56.2 | 5 K.VYVGNLGTGAGKGELER.A                                                     |
| *                 | Hs293FLP_TREX_Ti_103.1   | 2.7702 | 0.2787 | 1074.26 | 1074.22 | 7943.1  | 1    | 895.4  | 81.2 | 4 R.AFSYYGPLR.T                                                             |
|                   | HsHeLa_Control-MG_Ti_20  | 4.0134 | 0.3097 | 1622.36 | 1622.78 | 7266    | 1    | 1224.3 | 73.1 | 12 R.NPPGFVFEFEDPR.D                                                        |
| gi 16306492 ref N |                          | 2      | 2      | 0.167   | 240     | 27503   | 7.1  | U      |      | cell division cycle 2 protein isoform 2 [Homo sapiens]                      |
| gi 4502709 ref N  |                          | 2      | 2      | 0.135   | 297     | 34095   | 8.4  | U      |      | cell division cycle 2 protein isoform 1 [Homo sapiens]                      |
|                   | HsFLAG-Control_HeLa_S1(  | 2.7605 | 0.1583 | 2213.56 | 2213.54 | 9440.4  | 2    | 538.2  | 36.8 | 1 R.YSTPVDIWSIGTIFAELATK.K                                                  |
|                   | HsFLAG-Control_293_Ti_2( | 3.0792 | 0.2705 | 2289.71 | 2290.49 | 5554.3  | 1    | 410.2  | 44.7 | 1 R.ALGTPNNEVWPEVESLQDYK.N                                                  |
| gi 4759160 ref N  |                          | 1      | 2      | 0.167   | 126     | 13916   | 10.3 | U      |      | small nuclear ribonucleoprotein polypeptide D3 [Homo sapiens]               |
| *                 | Hs293FLP_Ti_304.1577.15  | 3.9912 | 0.4083 | 2415.45 | 2415.59 | 6351.3  | 1    | 1010.5 | 52.5 | 2 K.VLHEAEGHIVTCTENTGEVYR.G                                                 |
| gi 6912280 ref N  |                          | 4      | 5      | 0.166   | 338     | 38274   | 5.5  | U      |      | AHA1, activator of heat shock 90kDa protein ATPase homolog 1 [Homo sapiens] |
| *                 | HsFLAG-Control_HeLa_S1(  | 2.7806 | 0.1242 | 2511.62 | 2509.78 | 9734.5  | 1    | 472.4  | 38.1 | 1 K.TLFLAVQVQNEEGKCEVTEVSK.L                                                |
| *                 | HsFLAG-Control_HeLa_S1(  | 2.5725 | 0.1635 | 1485.25 | 1485.63 | 6691.8  | 1    | 655.4  | 68.2 | 1 K.ETFLTSPEELYR.V                                                          |
| *                 | HsFLAG-Control_HeLa_S1(  | 3.7862 | 0.3773 | 2445.15 | 2446.72 | 8308.4  | 1    | 893.3  | 45.2 | 2 R.VFTTQELVQAFTHAPATLEADR.G                                                |
| *                 | HsFLAG-Control_HeLa_S1(  | 4.8492 | 0.3378 | 2446.86 | 2446.72 | 6469.2  | 1    | 926.2  | 35.7 | 1 R.VFTTQELVQAFTHAPATLEADR.G                                                |
| gi 28882049 ref N |                          | 3      | 5      | 0.166   | 320     | 35244   | 5.5  | U      |      | replication factor C 2 (40kD) isoform 2 [Homo sapiens]                      |
| gi 31563534 ref N |                          | 3      | 5      | 0.15    | 354     | 39157   | 6.4  | U      |      | replication factor C 2 (40kD) isoform 1 [Homo sapiens]                      |
|                   | HsFLAG-Control_HeLa_NE   | 3.7738 | 0.2571 | 1446.46 | 1446.56 | 5293.9  | 1    | 937.7  | 75   | 2 K.LNEIVGNEDTVSR.L                                                         |
|                   | HsFLAG-Control_HeLa_S1(  | 3.0542 | 0.2209 | 1635.55 | 1634.87 | 5666    | 1    | 590.3  | 50   | 1 R.EGNVPNIIIAGPPGTGK.T                                                     |
|                   | HsFLAG-Control_HeLa_NE   | 3.4772 | 0.3151 | 2564.75 | 2563.83 | 9058.3  | 1    | 713.5  | 38.6 | 2 R.QALNNLQSTFSGFGFINSENVFK.V                                               |
| gi 4504803 ref N  |                          | 15     | 36     | 0.165   | 1142    | 131956  | 7.7  | U      |      | janus kinase 1 [Homo sapiens]                                               |
| *                 | HsHeLa_Control-MG_Ti_20  | 3.8395 | 0.1222 | 3002.06 | 3002.39 | 7000.5  | 6    | 480.8  | 26   | 1 K.KTEVNLEAPEPGVEVIFYLSREPLR.L                                             |
| *                 | HsHeLa_Control-MG_Ti_20  | 4.5654 | 0.4736 | 2035.57 | 2036.26 | 5861.6  | 1    | 1210.9 | 68.8 | 4 R.ISPLCHNLFALYDENTK.L                                                     |
| *                 | Hs293FLP-MG_Ti_203.499   | 4.3255 | 0.5113 | 2868.03 | 2869.24 | 9297.5  | 1    | 1004.2 | 38   | 2 K.IPDATPLLDASSLEYLFAQQQYDLVK.C                                            |
| *                 | HsHeLa_Control-MG_Ti_20  | 4.9669 | 0.3983 | 2868.73 | 2869.24 | 8999    | 1    | 1278.7 | 44   | 3 K.IPDATPLLDASSLEYLFAQQQYDLVK.C                                            |
| *                 | HsHeLa_Control-MG_Ti_20  | 5.1218 | 0.3156 | 2870.36 | 2869.24 | 7316.3  | 1    | 1386.7 | 34   | 2 K.IPDATPLLDASSLEYLFAQQQYDLVK.C                                            |
| *                 | HsHeLa_Control-MG_Ti_20  | 2.9676 | 0.144  | 1134.26 | 1134.32 | 8139.5  | 5    | 1248   | 87.5 | 1 K.RYIPETLNK.S                                                             |
| *                 | HsHeLa_Control-MG_Ti_20  | 5.4564 | 0.0855 | 2156.68 | 2157.39 | 7607.4  | 1    | 2241.3 | 66.7 | 3 K.LSSHEEALSFVSLVDGYFR.L                                                   |
| *                 | HsHeLa_Control-MG_Ti_20  | 3.9864 | 0.252  | 1379.54 | 1379.61 | 5988    | 1    | 1157.1 | 85   | 2 K.HIVYLYGVCVR.D                                                           |
| *                 | HsFLAG-Control_MG_293_   | 2.8517 | 0.1533 | 1544.51 | 1544.71 | 5730.9  | 1    | 736.2  | 62.5 | 1 R.IPWIAPECVEDSK.N                                                         |
| *                 | HsHeLa_Control-MG_Ti_20  | 3.3426 | 0.2596 | 1566.98 | 1566.75 | 4464.2  | 1    | 705.2  | 71.4 | 1 K.SLKPESSGGNHIADLK.K                                                      |
| *                 | HsHeLa_Control-MG_Ti_20  | 2.9982 | 0.1456 | 1694.46 | 1694.93 | 6116.6  | 1    | 541.4  | 56.7 | 1 K.SLKPESSGGNHIADLKK.E                                                     |
| *                 | HsHeLa_Control-MG_Ti_20  | 2.9168 | 0.1719 | 1130.2  | 1130.29 | 5376    | 2    | 894.7  | 87.5 | 2 R.NLYHENIVK.Y                                                             |
| *                 | HsHeLa_Control-MG_Ti_20  | 2.8982 | 0.2333 | 1282.39 | 1282.44 | 8025.7  | 5    | 905.9  | 70   | 1 R.NVLVESEHQVK.I                                                           |
| *                 | HsHeLa_Control-MG_Ti_10  | 3.6007 | 0.3271 | 2146.71 | 2146.4  | 5479.2  | 1    | 620    | 56.2 | 1 K.RLPCPPNCPDEVYQLMR.K                                                     |
| *                 | HsHeLa_Control-MG_Ti_20  | 4.6744 | 0.3853 | 1710.42 | 1710.97 | 6861.3  | 1    | 1767.1 | 78.6 | 11 R.TSFQNLIEGFEALLK.-                                                      |
| gi 24119203 ref N |                          | 3      | 7      | 0.165   | 248     | 29033   | 4.8  | U      |      | tropomyosin 3 isoform 2 [Homo sapiens]                                      |
|                   | HsFLAG-MOCK_300mM_T      | 3.7804 | 0.2326 | 1885.9  | 1885.09 | 7915.4  | 1    | 1326.7 | 44.6 | 1 R.RIQLVEEELDRAQER.L                                                       |
|                   | Hs293FLP_TREX_Ti_104.1   | 4.3686 | 0.233  | 1444.9  | 1444.67 | 9084.8  | 1    | 1752.4 | 79.2 | 3 R.LATALQKLEEA.EK.A                                                        |
|                   | HsHeLa_Control-MG_Ti_10  | 3.8528 | 0.1147 | 1689.98 | 1689.82 | 8374.2  | 1    | 1405.2 | 75   | 3 K.YSQKEDKYE.EEIK.I                                                        |
| gi 29029559 ref N |                          | 13     | 45     | 0.164   | 971     | 110417  | 5.8  | U      |      | CSE1 chromosome segregation 1-like protein [Homo sapiens]                   |
|                   | HsFLAG-Control_HeLa_S1(  | 5.3664 | 0.3032 | 2435    | 2434.84 | 8186.1  | 1    | 2065.4 | 43.8 | 1 K.FLESVEGNQNYPLLLLTLEK.S                                                  |
|                   | HsHeLa-FLAG-IP_S100_Ti   | 3.193  | 0.3625 | 2435.22 | 2434.84 | 7520    | 1    | 502.1  | 40   | 4 K.FLESVEGNQNYPLLLLTLEK.S                                                  |
|                   | HsFLAG-Control_HeLa_S1(  | 4.0163 | 0.3033 | 1589.64 | 1589.79 | 10064.2 | 1    | 1061.2 | 61.5 | 3 R.FQSGDFHIVINGVLR.T                                                       |
|                   | HsFLAG-Control_HeLa_S1(  | 4.0758 | 0.3687 | 1675.75 | 1676.05 | 5504.8  | 1    | 1006.9 | 71.4 | 2 K.LVLDAFALPLTNLFK.A                                                       |
| *                 | HsFLAG-Control_HeLa_S1(  | 5.5135 | 0.4338 | 1929.19 | 1930.16 | 8316.8  | 1    | 1748   | 65.6 | 10 K.LLQTDDEEEAGLLELLK.S                                                    |

|                   |                          |        |        |         |         |         |   |        |      |    |                                                                                      |
|-------------------|--------------------------|--------|--------|---------|---------|---------|---|--------|------|----|--------------------------------------------------------------------------------------|
| *                 | HsFLAG-Control_HeLa_NE   | 3.5724 | 0.3848 | 1811.87 | 1812.94 | 10393.3 | 1 | 1717.6 | 71.4 | 1  | K.NLFEDQNTLTSICEK.V                                                                  |
| *                 | HsFLAG-Control_HeLa_S10  | 4.6425 | 0.4397 | 1888.59 | 1888.9  | 7668.2  | 1 | 1353.2 | 66.7 | 10 | R.AADEEAFEDNSEEYIR.R                                                                 |
| *                 | HsFLAG-Control_HeLa_S10  | 4.7549 | 0.3262 | 1354.27 | 1352.57 | 6953.9  | 1 | 1840.7 | 83.3 | 1  | K.DAAIYLVTSLASK.A                                                                    |
| *                 | HsFLAG-Control_HeLa_NE   | 5.4242 | 0.3708 | 2806.13 | 2806.27 | 9613.6  | 1 | 1793.7 | 35   | 2  | R.GPNNATLFTAAEIAPFVEILLTNLFK.A                                                       |
| *                 | HsFLAG-Control_HeLa_S10  | 4.6011 | 0.3311 | 2806.16 | 2806.27 | 6162.7  | 1 | 650.4  | 40   | 5  | R.GPNNATLFTAAEIAPFVEILLTNLFK.A                                                       |
| *                 | HsFLAG-Control_HeLa_S10  | 7.1393 | 0.3647 | 2808.07 | 2806.27 | 9562    | 1 | 2437.9 | 39   | 4  | R.GPNNATLFTAAEIAPFVEILLTNLFK.A                                                       |
| *                 | HsFLAG-Control_HeLa_S10  | 3.2422 | 0.3046 | 1105.59 | 1106.18 | 3416    | 1 | 784.9  | 72.7 | 1  | R.GSNTIASAAADK.I                                                                     |
| *                 | HsFLAG-Control_HeLa_S10  | 3.0314 | 0.096  | 1072.35 | 1072.34 | 4610    | 6 | 606.9  | 77.8 | 1  | K.IPGLLGVFQK.L                                                                       |
| gi 67189747 ref N |                          | 6      | 13     | 0.163   | 288     | 32728   |   |        |      |    | ribosomal protein L6 [Homo sapiens]                                                  |
| gi 89027564 ref X |                          | 6      | 13     | 0.173   | 272     | 30905   |   |        |      |    | PREDICTED: similar to 60S ribosomal protein L6 (TAX-responsive enhancer element bind |
| gi 89027562 ref X |                          | 6      | 13     | 0.173   | 272     | 30905   |   |        |      |    | PREDICTED: similar to 60S ribosomal protein L6 (TAX-responsive enhancer element bind |
| gi 89027560 ref X |                          | 6      | 13     | 0.223   | 211     | 24310   |   |        |      |    | PREDICTED: similar to 60S ribosomal protein L6 (TAX-responsive enhancer element bind |
| gi 89027558 ref X |                          | 6      | 13     | 0.173   | 272     | 30905   |   |        |      |    | PREDICTED: similar to 60S ribosomal protein L6 (TAX-responsive enhancer element bind |
| gi 89027556 ref X |                          | 6      | 13     | 0.222   | 212     | 24343   |   |        |      |    | PREDICTED: similar to 60S ribosomal protein L6 (TAX-responsive enhancer element bind |
| gi 89027554 ref X |                          | 6      | 13     | 0.173   | 272     | 30905   |   |        |      |    | PREDICTED: similar to 60S ribosomal protein L6 (TAX-responsive enhancer element bind |
| gi 89027552 ref X |                          | 6      | 13     | 0.173   | 272     | 30905   |   |        |      |    | PREDICTED: similar to 60S ribosomal protein L6 (TAX-responsive enhancer element bind |
| gi 89025441 ref X |                          | 6      | 13     | 0.173   | 271     | 30777   |   |        |      |    | PREDICTED: similar to 60S ribosomal protein L6 (TAX-responsive enhancer element bind |
| gi 89025439 ref X |                          | 6      | 13     | 0.173   | 271     | 30777   |   |        |      |    | PREDICTED: similar to 60S ribosomal protein L6 (TAX-responsive enhancer element bind |
| gi 89025437 ref X |                          | 6      | 13     | 0.224   | 210     | 24182   |   |        |      |    | PREDICTED: similar to 60S ribosomal protein L6 (TAX-responsive enhancer element bind |
| gi 89025435 ref X |                          | 6      | 13     | 0.223   | 211     | 24215   |   |        |      |    | PREDICTED: similar to 60S ribosomal protein L6 (TAX-responsive enhancer element bind |
| gi 89025433 ref X |                          | 6      | 13     | 0.173   | 271     | 30777   |   |        |      |    | PREDICTED: similar to 60S ribosomal protein L6 (TAX-responsive enhancer element bind |
| gi 89025431 ref X |                          | 6      | 13     | 0.173   | 271     | 30777   |   |        |      |    | PREDICTED: similar to 60S ribosomal protein L6 (TAX-responsive enhancer element bind |
|                   | Hs293FLP_TREX_Ti_104.1   | 3.755  | 0.3511 | 1284.53 | 1285.53 | 5189    | 1 | 642    | 66.7 | 2  | K.VLATVTKPVGDK.N                                                                     |
|                   | Hs293FLP_TREX_Ti_104.1   | 3.4107 | 0.261  | 1285.41 | 1285.53 | 5347.3  | 1 | 819.1  | 70.8 | 5  | K.VLATVTKPVGDK.N                                                                     |
|                   | HsFLAG-MOCK_300mM_T      | 2.9349 | 0.1974 | 1286.31 | 1285.53 | 6480.2  | 3 | 672.8  | 66.7 | 2  | K.VLATVTKPVGDK.N                                                                     |
|                   | Hs293FLP_TREX_Ti_102.1   | 1.9579 | 0.27   | 1139.46 | 1140.24 | 5012.1  | 2 | 276.4  | 62.5 | 1  | R.YYPTEDVPR.K                                                                        |
|                   | HsFLAG-Control_Hela_Ti_1 | 3.3518 | 0.3263 | 1765.01 | 1765.15 | 7676.4  | 1 | 721    | 53.1 | 1  | K.QLASGLLLVTGPLVLR.V                                                                 |
|                   | Hs293FLP_TREX_Ti_102.1   | 1.9737 | 0.1386 | 866.5   | 867.033 | 5435.6  | 1 | 659.8  | 85.7 | 2  | K.FVIATSTK.I                                                                         |
| gi 4506585 ref NF |                          | 3      | 4      | 0.163   | 270     | 29247   |   |        |      |    | replication protein A2, 32kDa [Homo sapiens]                                         |
| *                 | HsHeLa_Control-MG_Ti_10  | 3.1144 | 0.3189 | 2511.95 | 2511.66 | 3705.8  | 1 | 452    | 50   | 1  | R.QWVDTDDTSSSENTVVPPEYVK.V                                                           |
| *                 | HsHeLa_Control-MG_Ti_10  | 3.9091 | 0.2433 | 1645.83 | 1645.82 | 4830    | 3 | 700.6  | 65.4 | 2  | K.ACPRPEGLNFQDLK.N                                                                   |
| *                 | HsHeLa_Control-MG_Ti_10  | 1.8456 | 0.2046 | 888.82  | 889.058 | 4987.6  | 3 | 387.2  | 71.4 | 1  | K.HMSVSSIK.Q                                                                         |
| gi 15431306 ref N |                          | 6      | 12     | 0.163   | 257     | 28025   |   |        |      |    | ribosomal protein L8 [Homo sapiens]                                                  |
| gi 4506663 ref NF |                          | 6      | 12     | 0.163   | 257     | 28025   |   |        |      |    | ribosomal protein L8 [Homo sapiens]                                                  |
|                   | Hs293FLP_TREX_Ti_105.1   | 3.1272 | 0.2393 | 1460.58 | 1460.68 | 3863.4  | 2 | 530.6  | 69.2 | 1  | K.DIIHDPGRGAPLAK.V                                                                   |
|                   | HsFLAG-MOCK_300mM_T      | 4.3817 | 0.3992 | 1689.67 | 1689.82 | 7829.6  | 1 | 1315.2 | 63.3 | 1  | R.ASGNYATVISHNPETK.K                                                                 |
|                   | Hs293FLP_TREX_Ti_105.1   | 4.0528 | 0.3475 | 1817.42 | 1818    | 7333.2  | 1 | 1002.9 | 56.2 | 2  | R.ASGNYATVISHNPETKK.T                                                                |
|                   | Hs293FLP_TREX_Ti_103.1   | 2.9887 | 0.2442 | 941.5   | 942.106 | 5650.3  | 1 | 471.7  | 65   | 1  | R.AVVGVVAGGGR.I                                                                      |
|                   | HsFLAG-Control_MG_293_   | 3.6661 | 0.3252 | 942.22  | 942.106 | 6523.4  | 1 | 1669.9 | 85   | 6  | R.AVVGVVAGGGR.I                                                                      |
|                   | HsFLAG-MOCK_300mM_T      | 3.4756 | 0.3353 | 942.4   | 942.106 | 5581.5  | 1 | 1573.4 | 85   | 1  | R.AVVGVVAGGGR.I                                                                      |
| gi 4506693 ref NF |                          | 1      | 3      | 0.163   | 135     | 15550   |   |        |      |    | ribosomal protein S17 [Homo sapiens]                                                 |
| gi 89059266 ref X |                          | 1      | 3      | 0.163   | 135     | 15602   |   |        |      |    | PREDICTED: similar to 40S ribosomal protein S17 [Homo sapiens]                       |
| gi 51476007 ref X |                          | 1      | 3      | 0.163   | 135     | 15602   |   |        |      |    | PREDICTED: similar to 40S ribosomal protein S17 [Homo sapiens]                       |
| gi 4503265 ref NF | HsFLAG-Control_Hela_Ti_1 | 4.5985 | 0.4231 | 2489.37 | 2490.68 | 7324.5  | 1 | 1330.5 | 57.1 | 3  | R.DNYVPEVSALDQEIIIEVDPDTK.E                                                          |
| *                 | Hs283FLP_Ti_105.1345.13  | 3.8601 | 0.2651 | 2632.95 | 2632.71 | 5141.6  | 8 | 478.6  | 29.5 | 1  | K.DSEEDVVETPAVSHDEHTEHQEIK.G                                                         |
| *                 | HsFlag1P_Ti_104.2981.298 | 3.5469 | 0.2013 | 1491.43 | 1491.77 | 5746.9  | 1 | 1142.9 | 81.8 | 2  | R.ILKEDILNYLEK.Q                                                                     |
| *                 | HsHeLa_Control-MG_Ti_20  | 2.556  | 0.273  | 2049.78 | 2050.28 | 4792.6  | 1 | 265.9  | 46.9 | 1  | K.IPHFGYCDIDLTELVK.L                                                                 |
| *                 | Hs283FLP_Ti_103.3215.32  | 3.6269 | 0.2952 | 2880.84 | 2881.22 | 5757.3  | 1 | 495.2  | 27   | 2  | K.AASLGLLQFPILNASVDENCQNITYK.A                                                       |

|                            |        |        |         |         |         |     |        |                                                                      |                                  |
|----------------------------|--------|--------|---------|---------|---------|-----|--------|----------------------------------------------------------------------|----------------------------------|
| gi 89031528 ref X          | 3      | 4      | 0.161   | 261     | 29663   | 9.5 | U      | PREDICTED: similar to ribosomal protein S3a isoform 2 [Homo sapiens] |                                  |
| gi 89033501 ref X          | 3      | 4      | 0.161   | 261     | 29663   | 9.5 | U      | PREDICTED: similar to ribosomal protein S3a isoform 4 [Homo sapiens] |                                  |
| HsFLAG-Control_293_Ti_1(   | 2.7091 | 0.2616 | 1952.81 | 1953.16 | 8138.8  | 1   | 428.8  | 46.9                                                                 | 1 R.VFEVSLADLQNDEVAFR.K          |
| HsFLAG-Control_293_Ti_2(   | 2.8582 | 0.3372 | 1346.13 | 1346.49 | 8117.1  | 1   | 682.5  | 65                                                                   | 1 R.KTSYAQQHQVQR.Q               |
| Hs293FLP-MG_Ti_204.252     | 3.2536 | 0.3231 | 1705.53 | 1705.92 | 4408.4  | 1   | 515.8  | 61.5                                                                 | 2 K.ACQSIYPLHDVFVR.K             |
| gi 30410794 ref N          | 3      | 10     | 0.161   | 254     | 29506   | 6   | U      | proteasome activator subunit 3 isoform 1 [Homo sapiens]              |                                  |
| gi 30410796 ref N          | 3      | 10     | 0.154   | 267     | 30887   | 6.1 | U      | proteasome activator subunit 3 isoform 2 [Homo sapiens]              |                                  |
| HsFLAG-Control_HeLa_NE     | 4.8523 | 0.4428 | 1682.41 | 1681.88 | 8368.8  | 1   | 1908.7 | 75                                                                   | 3 R.ITSEAEDLVANFFPK.K            |
| HsFLAG-Control_HeLa_S1(    | 3.875  | 0.2263 | 1287.5  | 1287.46 | 8275.6  | 1   | 1415.2 | 80                                                                   | 4 K.SNQQQLVDIIK.V                |
| HsFLAG-Control_HeLa_NE     | 4.3787 | 0.3957 | 1670.31 | 1669.79 | 7554.1  | 1   | 2096.5 | 78.6                                                                 | 3 R.TVESEAASYLDQISR.Y            |
| gi 4507191 ref NF          | 29     | 73     | 0.16    | 2472    | 284281  | 5.3 | U      | spectrin, alpha, non-erythrocytic 1 (alpha-fodrin) [Homo sapiens]    |                                  |
| * Hs283FLP_Ti_106.2436.24  | 5.429  | 0.4792 | 2368.5  | 2367.62 | 5616    | 1   | 1310.7 | 62.5                                                                 | 1 K.EAIVTSEELGQDLEHVEVLQK.K      |
| * HsFLAG-Control_HeLa_NE   | 4.1997 | 0.2112 | 1606.71 | 1606.82 | 6167.8  | 1   | 997.9  | 70.8                                                                 | 2 K.LIQEQHPPEELIK.T              |
| * HsFLAG-Control_HeLa_NE   | 2.6276 | 0.1568 | 1086.06 | 1086.28 | 10943.8 | 1   | 1543.5 | 83.3                                                                 | 1 R.DLASVQALLR.K                 |
| * HsHeLa_Control-MG_Ti_20  | 4.2445 | 0.2867 | 1678.13 | 1678.93 | 5081.3  | 1   | 734.5  | 67.9                                                                 | 1 R.LQQSHPLSATQIQVK.R            |
| * HsHeLa_Control-MG_Ti_20  | 6.1914 | 0.4643 | 2127.69 | 2128.34 | 8858.3  | 1   | 2541.1 | 67.5                                                                 | 7 K.ALINADELASDVAGAEALLDR.H      |
| * HsFLAG-Control_HeLa_NE   | 4.1413 | 0.1508 | 2128.53 | 2128.34 | 11102.5 | 1   | 1757.3 | 36.2                                                                 | 2 K.ALINADELASDVAGAEALLDR.H      |
| * HsFLAG-Control_HeLa_NE   | 5.724  | 0.5185 | 2128.7  | 2128.34 | 8291.8  | 1   | 2285.4 | 65                                                                   | 4 K.ALINADELASDVAGAEALLDR.H      |
| * HsFLAG-Control_HeLa_NE   | 4.2329 | 0.345  | 2147.33 | 2148.25 | 6898.4  | 1   | 1445.5 | 60                                                                   | 1 K.SADESGQALLAAGHYASDEV.R.E     |
| * HsHeLa_Control-MG_Ti_20  | 4.3664 | 0.3848 | 1708.47 | 1708.92 | 8934.8  | 1   | 1406.8 | 69.2                                                                 | 2 R.AQLADSFHLQQFFR.D             |
| * Hs293FLP_Ti_303.1455.14  | 3.0607 | 0.4432 | 1590.58 | 1588.68 | 5279.5  | 1   | 961.9  | 69.2                                                                 | 1 K.HQAFEAEELSANQSR.I            |
| * HsHeLa_Control-MG_Ti_10  | 4.0638 | 0.3215 | 1533.52 | 1532.66 | 8317    | 1   | 1419.2 | 81.8                                                                 | 1 K.LREANQQQQFNR.N               |
| * Hs293FLP_Ti_305.1451.14  | 3.9955 | 0.4051 | 1557.84 | 1557.71 | 6138.1  | 1   | 1490.9 | 80.8                                                                 | 1 K.HQALQAEIAGHEPR.I             |
| * Hs293FLP_Ti_304.2547.25  | 3.1888 | 0.1791 | 1487    | 1484.69 | 5810    | 3   | 528.9  | 59.1                                                                 | 1 K.ELVLALYDYQEK.S               |
| * HsHeLa_Control-MG_Ti_10  | 4.6519 | 0.2672 | 1418.73 | 1417.65 | 7251.1  | 1   | 1865.2 | 83.3                                                                 | 5 K.KGDILTLLNSTNK.D              |
| * Hs293FLP-MG_Ti_105.137   | 3.5146 | 0.2305 | 1326.34 | 1325.47 | 4861.5  | 1   | 1028   | 81.8                                                                 | 2 R.SQLLGSAAHEVQR.F              |
| * Hs293FLP_Ti_303.1939.19  | 4.4721 | 0.4674 | 2329.18 | 2329.49 | 8090.9  | 1   | 1482.5 | 57.5                                                                 | 1 K.NQALNTDNYGHDLASVQALQR.K      |
| * HsHeLa_Control-MG_Ti_20  | 3.9486 | 0.2423 | 2876.2  | 2877.19 | 6586.9  | 1   | 1036.6 | 32                                                                   | 2 R.AGTFQAFEQFGQQLLAHGHYASPEIK.Q |
| * HsFLAG-Control_HeLa_NE   | 4.2952 | 0.4237 | 2295.88 | 2295.51 | 9873.9  | 1   | 734.2  | 42.5                                                                 | 3 R.EAFLNTEDKGDLSDSVEALIK.K      |
| * HsHeLa_Control-MG_Ti_20  | 5.2969 | 0.4174 | 1972.73 | 1973.28 | 7818.9  | 1   | 1994.5 | 63.9                                                                 | 9 K.IAALQAFADQLIAAGHYAK.G        |
| * Hs293FLP-MG_Ti_205.377   | 4.9059 | 0.3069 | 1973.07 | 1973.28 | 5887.7  | 1   | 1171.2 | 41.7                                                                 | 2 K.IAALQAFADQLIAAGHYAK.G        |
| * HsFlag1P_Ti_105.3218.321 | 5.0468 | 0.4859 | 1631.03 | 1631.92 | 9179.1  | 1   | 2724.7 | 84.6                                                                 | 6 R.LAALADQWQFLVQK.S             |
| * HsGST-MOCK_Ti_102.138(   | 4.0933 | 0.1982 | 1874.71 | 1875.05 | 7509.4  | 1   | 1573.4 | 70                                                                   | 1 K.KLSDNTIGKEIQQR.L             |
| * HsFLAG-MOCK_300mM_T      | 3.4463 | 0.3402 | 1437.71 | 1437.51 | 8580.3  | 1   | 977.4  | 68.2                                                                 | 1 K.KNNHHEENISSK.M               |
| * Hs293FLP_TREX_Ti_102.2   | 3.2027 | 0.1702 | 1205.42 | 1205.39 | 6573.5  | 1   | 1264.4 | 85                                                                   | 4 R.DLSSVQTLTK.Q                 |
| * HsFlag1P_Ti_105.3011.301 | 3.6485 | 0.2722 | 1311.26 | 1311.56 | 5289.2  | 1   | 945.9  | 80                                                                   | 1 R.KVEDLFLTFK.K                 |
| * Hs293FLP_Ti_302.3886.38  | 2.9786 | 0.1949 | 2299.6  | 2299.42 | 6797.4  | 1   | 483.7  | 39.5                                                                 | 1 K.ASAFNSWFENAEEDLTDVPR.C       |
| * Hs293FLP-MG_Ti_202.326   | 5.1751 | 0.426  | 1952.5  | 1953.07 | 9740    | 1   | 2958.3 | 73.5                                                                 | 6 R.SSLSSAQADFNQLAELDR.Q         |
| * HsFlag1P_Ti_105.2843.284 | 4.1616 | 0.4332 | 1802.74 | 1802    | 5263.6  | 1   | 1123.6 | 75                                                                   | 2 K.GRELPTAFDYVEFTR.S            |
| * HsFLAG-Control_HeLa_NE   | 3.2017 | 0.2687 | 1588.1  | 1588.76 | 6137.6  | 3   | 453.4  | 58.3                                                                 | 2 R.ELPTAFDYVEFTR.S              |
| gi 4504983 ref NF          | 3      | 5      | 0.16    | 250     | 26188   | 8.5 | U      | galectin 3 [Homo sapiens]                                            |                                  |
| * HsHeLa3_Ti_106.2455.245  | 3.3301 | 0.145  | 1644.26 | 1642.01 | 5737.5  | 2   | 740.2  | 57.1                                                                 | 3 R.MLITILGTVKPNANR.I            |
| * HsHeLa3_Ti_104.1863.186  | 3.229  | 0.1392 | 1325.58 | 1325.55 | 6804.9  | 7   | 849.6  | 70                                                                   | 1 K.IQVLVEPDHFK.V                |
| * HsHeLa3_Ti_106.2068.206  | 2.7391 | 0.3564 | 1651.2  | 1650.84 | 8583.7  | 1   | 873.6  | 57.7                                                                 | 1 K.VAVNDAHLLQYNHR.V             |
| gi 17298690 ref N          | 5      | 10     | 0.159   | 542     | 58172   | 5.3 | U      | fuse-binding protein-interacting repressor isoform b [Homo sapiens]  |                                  |
| gi 17978512 ref N          | 5      | 10     | 0.154   | 559     | 59876   | 5.3 | U      | fuse-binding protein-interacting repressor isoform a [Homo sapiens]  |                                  |
| HsFLAG-Control_HeLa_NE     | 3.2345 | 0.3073 | 1762.69 | 1763.04 | 4477.6  | 1   | 509.5  | 60                                                                   | 4 K.LGLPPLTPEQQEALQK.A           |
| HsFLAG-Control_HeLa_NE     | 2.7476 | 0.3483 | 1878.78 | 1878.09 | 8215.3  | 1   | 739.1  | 53.3                                                                 | 1 R.VYVGSIIYELGEDTIR.Q           |
| HsFLAG-Control_HeLa_NE     | 4.9305 | 0.438  | 1820.53 | 1818.98 | 7791.1  | 1   | 2382.5 | 83.3                                                                 | 3 R.IYVASVHQDLSDDDIK.S           |



|                    |                          |        |        |         |         |         |      |        |      |    |                                                                                                       |
|--------------------|--------------------------|--------|--------|---------|---------|---------|------|--------|------|----|-------------------------------------------------------------------------------------------------------|
|                    | HsHeLa3_Ti_102.3627.362  | 3.7216 | 0.3213 | 2389.5  | 2388.61 | 6882.4  | 1    | 851.4  | 47.6 | 1  | K.AQSSQDAVSSMNLFDLGGQYLR.V                                                                            |
|                    | HsFLAG-Control_HeLa_NE   | 3.0383 | 0.1482 | 1827.64 | 1824.81 | 9146.4  | 4    | 582.8  | 46.7 | 1  | K.DIDDDLEGEVTEECGK.F                                                                                  |
| gi 4506621 ref NF  |                          | 3      | 4      | 0.159   | 145     | 17258   | 10.6 | U      |      |    | ribosomal protein L26 [Homo sapiens]                                                                  |
| gi 89034466 ref X  |                          | 3      | 4      | 0.159   | 145     | 17282   | 10.5 | U      |      |    | PREDICTED: similar to 60S ribosomal protein L26-like 1 [Homo sapiens]                                 |
| gi 89033748 ref X  |                          | 3      | 4      | 0.159   | 145     | 17268   | 10.4 | U      |      |    | PREDICTED: similar to 60S ribosomal protein L26-like 1 [Homo sapiens]                                 |
| gi 7705813 ref NF  |                          | 3      | 4      | 0.159   | 145     | 17256   | 10.6 | U      |      |    | ribosomal protein L26-like 1 [Homo sapiens]                                                           |
|                    | Hs293FLP_TREX_Ti_102.1   | 3.1355 | 0.257  | 1088.36 | 1088.21 | 4753.5  | 1    | 824.6  | 87.5 | 1  | R.KDDEVQVVR.G                                                                                         |
|                    | Hs293FLP_TREX_Ti_106.2   | 2.753  | 0.3933 | 1418.46 | 1418.6  | 4224.7  | 1    | 332.3  | 53.8 | 1  | K.ANGTTVHVGIHPSK.V                                                                                    |
|                    | Hs293FLP_TREX_Ti_106.2   | 4.0291 | 0.3748 | 1418.59 | 1418.6  | 7306.7  | 1    | 1198.8 | 69.2 | 2  | K.ANGTTVHVGIHPSK.V                                                                                    |
| gi 28570172 ref NF |                          | 3      | 4      | 0.158   | 329     | 35886   | 8.3  | U      |      |    | NADP-dependent leukotriene B4 12-hydroxydehydrogenase [Homo sapiens]                                  |
| *                  | HsHeLa_Control-MG_Ti_20  | 3.2647 | 0.2319 | 1655.44 | 1654.82 | 5775.7  | 1    | 849    | 65.4 | 1  | K.HFVGYPNTSDFELK.T                                                                                    |
| *                  | HsHeLa_Control-MG_Ti_10  | 3.1157 | 0.2499 | 1928.52 | 1928.15 | 5097.4  | 1    | 564.5  | 52.8 | 1  | K.GTIVLASPGWTTTHSISDGK.D                                                                              |
| *                  | HsHeLa_Control-MG_Ti_20  | 3.8665 | 0.3272 | 2073.35 | 2074.43 | 2910    | 1    | 279.4  | 58.3 | 2  | R.TGPLPPGPPPEIVYQELR.M                                                                                |
| gi 8393159 ref NF  |                          | 1      | 13     | 0.158   | 146     | 15921   | 4.4  | U      |      |    | calmodulin-like skin protein [Homo sapiens]                                                           |
| *                  | HsFLAG-Control_Hela_Ti_1 | 5.767  | 0.5056 | 2264.58 | 2264.45 | 7702.9  | 1    | 1735.6 | 59.1 | 13 | K.AFSAVDTDGNGTINAQELGAALK.A                                                                           |
| gi 4506787 ref NF  |                          | 18     | 37     | 0.157   | 1657    | 189251  | 6.5  | U      |      |    | IQ motif containing GTPase activating protein 1 [Homo sapiens]                                        |
| *                  | HsFLAG-Control_HeLa_S10  | 2.9727 | 0.2635 | 1533.25 | 1533.68 | 4646.8  | 2    | 532.2  | 68.2 | 1  | K.IFYPETTDIYDR.K                                                                                      |
| *                  | HsFLAG-Control_HeLa_S10  | 4.3422 | 0.3532 | 2962.33 | 2960.36 | 8128.6  | 1    | 1034.6 | 28.6 | 1  | K.IGGILANELSVDEAALHAAVIAINEAIDR.R                                                                     |
| *                  | HsFLAG-Control_HeLa_S10  | 4.439  | 0.3331 | 2562.39 | 2563.91 | 11000.6 | 1    | 947.8  | 41.3 | 3  | K.VNTFSALANIDLALAEQGDALALFR.A                                                                         |
| *                  | HsFLAG-Control_HeLa_S10  | 2.6459 | 0.1328 | 1027.34 | 1026.22 | 8052.9  | 5    | 1158.9 | 83.3 | 1  | R.ALQSPALGLR.G                                                                                        |
| *                  | HsFLAG-Control_HeLa_S10  | 4.83   | 0.3499 | 1296.84 | 1296.6  | 9274.5  | 1    | 2296.2 | 83.3 | 1  | R.LAAVALINAAIQK.G                                                                                     |
| *                  | HsFLAG-Control_HeLa_S10  | 4.58   | 0.3228 | 1884.49 | 1884.14 | 7684.3  | 1    | 1358.9 | 42.6 | 1  | R.ILAIGLINEALDEGDAQK.T                                                                                |
| *                  | HsFLAG-Control_HeLa_S10  | 3.553  | 0.3201 | 1885    | 1884.14 | 10565.4 | 2    | 866.7  | 47.1 | 2  | R.ILAIGLINEALDEGDAQK.T                                                                                |
| *                  | HsFLAG-Control_HeLa_NE   | 5.5538 | 0.4174 | 1885.14 | 1884.14 | 7943.1  | 1    | 2567   | 79.4 | 5  | R.ILAIGLINEALDEGDAQK.T                                                                                |
| *                  | HsFLAG-Control_HeLa_S10  | 2.8266 | 0.1727 | 1153.49 | 1154.4  | 8510.1  | 2    | 724.2  | 65   | 3  | K.TLQALQIPAAK.L                                                                                       |
| *                  | HsFLAG-Control_HeLa_S10  | 3.8261 | 0.3775 | 2057.33 | 2056.33 | 7727.6  | 1    | 917.9  | 52.9 | 3  | K.LEGVLAEVAQHYQDTLIR.A                                                                                |
| *                  | HsFLAG-Control_HeLa_S10  | 4.7881 | 0.3927 | 1938.55 | 1938.19 | 7572.6  | 1    | 1216.3 | 58.3 | 6  | K.FALGIFAINAVESGDVVGK.T                                                                               |
| *                  | HsFLAG-Control_HeLa_S10  | 2.8025 | 0.1075 | 1602.27 | 1601.81 | 7404.1  | 1    | 632.1  | 62.5 | 1  | K.QIPAITCIQSQR.G                                                                                      |
| *                  | HsFLAG-Control_HeLa_S10  | 4.0879 | 0.325  | 2429.03 | 2427.81 | 8562.7  | 1    | 1030.9 | 50   | 1  | K.LEAYQHLYLLQTNPTYLAK.L                                                                               |
| *                  | HsFLAG-Control_HeLa_NE   | 4.0537 | 0.3173 | 1939.83 | 1940.16 | 4783.6  | 1    | 764.2  | 62.5 | 3  | K.LPYDVTPEQALAEHEVK.T                                                                                 |
| *                  | HsFLAG-Control_HeLa_S10  | 3.0103 | 0.3851 | 1698.45 | 1698.84 | 6099.2  | 1    | 601.3  | 61.5 | 2  | R.FFQTACDVPELQDK.F                                                                                    |
| *                  | HsFLAG-Control_HeLa_S10  | 2.7702 | 0.175  | 1644.5  | 1644.82 | 8122.6  | 1    | 1671.1 | 76.9 | 1  | K.FNVDEYSDLVTLTK.P                                                                                    |
| *                  | HsFLAG-Control_HeLa_NE   | 2.8833 | 0.1763 | 1236.4  | 1235.38 | 7189.9  | 1    | 1251.8 | 88.9 | 1  | K.YQELINDIAR.D                                                                                        |
| *                  | HsFLAG-Control_HeLa_S10  | 4.113  | 0.4557 | 2052.95 | 2053.27 | 7425.8  | 1    | 1199.3 | 61.8 | 1  | K.NVIFEISPTTEEVGDFEVK.A                                                                               |
| gi 5902076 ref NF  |                          | 4      | 6      | 0.157   | 248     | 27745   | 10.4 | U      |      |    | splicing factor, arginine/serine-rich 1 (splicing factor 2, alternate splicing factor) [Homo sapiens] |
| *                  | Hs293FLP_TREX_Ti_103.2   | 2.9346 | 0.1493 | 1258.27 | 1257.48 | 5428.1  | 2    | 623.4  | 75   | 1  | R.IYVGNLPPDIR.T                                                                                       |
| *                  | Hs293FLP_TREX_Ti_102.2   | 2.8494 | 0.1537 | 1028.33 | 1029.13 | 7621    | 6    | 829.7  | 78.6 | 2  | K.DIEDVFK.Y                                                                                           |
| *                  | HsFLAG-Control_HeLa_NE   | 2.8166 | 0.1761 | 1079.2  | 1079.2  | 5978.2  | 1    | 1003.8 | 88.9 | 1  | R.DGTGVVEFVR.K                                                                                        |
| *                  | Hs293FLP_TREX_Ti_103.1   | 3.2393 | 0.2315 | 1163.56 | 1163.23 | 4297.7  | 1    | 810.5  | 83.3 | 2  | R.SHEGETAYIR.V                                                                                        |
| gi 5453555 ref NF  |                          | 5      | 9      | 0.157   | 216     | 24423   | 7.5  | U      |      |    | ras-related nuclear protein [Homo sapiens]                                                            |
| *                  | HsHeLa3_Ti_103.1584.158  | 1.8576 | 0.2981 | 1015.7  | 1016.18 | 4929.8  | 1    | 572.2  | 70   | 1  | K.LVLVGDGGTGK.T                                                                                       |
| *                  | Hs293FLP_TREX_Ti_102.1   | 3.9199 | 0.3217 | 1516.54 | 1516.71 | 4081.6  | 2    | 959    | 83.3 | 4  | R.VCENIPIVLCGNK.V                                                                                     |
| *                  | Hs293FLP_TREX_Ti_102.1   | 2.9307 | 0.2104 | 1214.34 | 1215.35 | 4801.9  | 1    | 393    | 72.2 | 2  | K.NLQYYDISAK.S                                                                                        |
| *                  | HsHeLa3_Ti_103.1734.173  | 2.7727 | 0.1521 | 1214.68 | 1215.35 | 5395    | 3    | 421.8  | 72.2 | 1  | K.NLQYYDISAK.S                                                                                        |
| *                  | HsFLAG-Control_HeLa_NE   | 2.5077 | 0.1152 | 1215.43 | 1215.35 | 6020.5  | 5    | 691.6  | 72.2 | 1  | K.NLQYYDISAK.S                                                                                        |
| gi 4502389 ref NF  |                          | 1      | 2      | 0.157   | 89      | 10059   | 6.1  | U      |      |    | barrier to autointegration factor 1 [Homo sapiens]                                                    |
| gi 88959141 ref X  |                          | 1      | 2      | 0.163   | 86      | 9740    | 6.1  | U      |      |    | PREDICTED: similar to barrier to autointegration factor 1 [Homo sapiens]                              |
| gi 88953904 ref X  |                          | 1      | 2      | 0.163   | 86      | 9740    | 6.1  | U      |      |    | PREDICTED: similar to barrier to autointegration factor 1 [Homo sapiens]                              |
|                    | HsFLAG-Control_293_Ti_20 | 3.3511 | 0.3931 | 1297.29 | 1297.54 | 7119.5  | 1    | 1029.4 | 69.2 | 2  | K.PVGSGLAGIGEVLGK.K                                                                                   |

|                   |                          |        |        |         |         |         |                                                                                         |        |      |                                  |
|-------------------|--------------------------|--------|--------|---------|---------|---------|-----------------------------------------------------------------------------------------|--------|------|----------------------------------|
| gij30315658 ref N | 21                       | 54     | 0.156  | 2155    | 251417  | 5.6 U   | spectrin, beta, non-erythrocytic 1 isoform 2 [Homo sapiens]                             |        |      |                                  |
| *                 | HsHeLa_Control-MG_Ti_10  | 3.1814 | 0.2362 | 2801.72 | 2801.04 | 4765.8  | 2                                                                                       | 263.2  | 30   | 2 R.TSSISGPLSPAYTGQVPYNYNQLEGR.F |
|                   | HsHeLa_Control-MG_Ti_20  | 3.6659 | 0.4837 | 1978.91 | 1979.16 | 6118.1  | 1                                                                                       | 623.6  | 56.2 | 1 K.TAGYPNVNIHNFTTSWR.D          |
|                   | HsHeLa_Control-MG_Ti_10  | 5.7495 | 0.4072 | 2485.89 | 2484.73 | 9319.6  | 1                                                                                       | 2418.5 | 41.7 | 2 K.SNAHYNLQNAFNLAEQHLGLTK.L     |
|                   | HsFLAG-Control_HeLa_NE   | 3.7666 | 0.3027 | 1722.39 | 1722.85 | 9166.6  | 1                                                                                       | 1270.8 | 67.9 | 1 K.LLDPEDISVDHPDEK.S            |
|                   | HsHeLa_Control-MG_Ti_20  | 5.4697 | 0.4777 | 2185.36 | 2185.45 | 9125.3  | 1                                                                                       | 1788.4 | 61.1 | 14 K.FANSLVGVQQQLPAFNTYR.T       |
|                   | HsFLAG-Control_HeLa_NE   | 4.0704 | 0.2917 | 2022.17 | 2023.25 | 6167.4  | 2                                                                                       | 812.1  | 55.6 | 6 R.LVSQDNFGFDLPVAEATK.K         |
|                   | HsHeLa_Control-MG_Ti_10  | 3.7671 | 0.2724 | 1265.71 | 1265.5  | 3580.7  | 1                                                                                       | 901.9  | 85   | 2 K.HLLGVEDLLQK.H                |
|                   | HsFLAG-Control_HeLa_NE   | 4.6418 | 0.42   | 2052.36 | 2052.2  | 7628.2  | 1                                                                                       | 1247.7 | 61.1 | 3 K.IVSSSDVGHDEYSTQSLVK.K        |
|                   | HsFlag1P_Ti_104.3099.309 | 4.6181 | 0.357  | 2319.54 | 2320.53 | 8608.8  | 1                                                                                       | 1093   | 50   | 3 K.DALLSALSIQNYHLECNETK.S       |
|                   | HsFlag1P_Ti_105.3421.342 | 3.2246 | 0.3661 | 1893.32 | 1894.19 | 5548.6  | 1                                                                                       | 487.8  | 50   | 1 R.LAEISDVWEEMKTTLK.N           |
|                   | Hs293FLP_Ti_304.1261.126 | 2.8291 | 0.1554 | 1097.19 | 1096.27 | 5622.2  | 2                                                                                       | 662.6  | 75   | 1 K.LLTQHENIK.N                  |
|                   | HsFlag1P_Ti_105.2266.226 | 4.3426 | 0.3537 | 1524.63 | 1525.7  | 7652.4  | 1                                                                                       | 1878.3 | 83.3 | 1 R.LQALDTGWNELHK.M              |
|                   | HsHeLa_Control-MG_Ti_20  | 3.6898 | 0.2976 | 1833.69 | 1834.05 | 2820.9  | 1                                                                                       | 394.7  | 64.3 | 2 R.QNLLSQSHAYQQFLR.D            |
|                   | HsFlag1P_Ti_104.3259.325 | 4.3457 | 0.2628 | 1923.48 | 1924.13 | 10090.5 | 1                                                                                       | 2857.4 | 82.1 | 2 K.FLQDCQELSLWINEK.M            |
|                   | HsFLAG-Control_HeLa_NE   | 4.6725 | 0.4922 | 1888.6  | 1889.03 | 7770.9  | 1                                                                                       | 1589.2 | 68.8 | 2 K.EIEELQSQAQALSQEGK.S          |
|                   | HsHeLa_Control-MG_Ti_20  | 1.8772 | 0.1552 | 943.45  | 944.038 | 2530.1  | 2                                                                                       | 138    | 75   | 1 K.EIHQFNR.D                    |
|                   | HsFlag1P_Ti_105.3208.320 | 3.0756 | 0.285  | 1616.06 | 1615.87 | 4785.3  | 1                                                                                       | 489.1  | 66.7 | 2 K.QLWGLLIEETEKR.H              |
|                   | HsHeLa_Control-MG_Ti_10  | 5.1985 | 0.4872 | 2340.67 | 2339.57 | 7669.4  | 1                                                                                       | 1832.9 | 46.1 | 2 K.HQILEQAVEDYAETVHQLSK.T       |
|                   | HsHeLa_Control-MG_Ti_20  | 2.8857 | 0.3354 | 1312.78 | 1311.39 | 8336.7  | 7                                                                                       | 704.3  | 63.6 | 1 R.ALVADSHPESER.I               |
|                   | HsFlag1P_Ti_105.2024.202 | 3.8258 | 0.2344 | 1375.09 | 1374.58 | 6821.1  | 3                                                                                       | 1293.7 | 77.3 | 1 R.TQILAASYELHK.F               |
|                   | HsFlag1P_Ti_104.3489.348 | 3.4352 | 0.2274 | 2092.66 | 2093.3  | 9625.2  | 2                                                                                       | 869.7  | 47.2 | 4 R.DASVAEAWLLGQEPYLSSR.E        |
| gij55743153 ref N | 6                        | 10     | 0.156  | 514     | 58604   | 6.2 U   | WD repeat domain 26 [Homo sapiens]                                                      |        |      |                                  |
| *                 | HsHeLa_Control-MG_Ti_20  | 4.1988 | 0.2713 | 1996.2  | 1995.28 | 7012.4  | 1                                                                                       | 968.5  | 56.2 | 2 K.DTTVIIWQVDPDTHLLK.L          |
| *                 | HsHeLa_Control-MG_Ti_20  | 4.0938 | 0.3525 | 2372.74 | 2373.51 | 8866.4  | 1                                                                                       | 1299.6 | 52.6 | 1 R.GQFYQCDLDGNLLDSWEGVR.V       |
| *                 | HsHeLa_Control-MG_Ti_20  | 2.9989 | 0.2055 | 1128.53 | 1128.23 | 6333.1  | 2                                                                                       | 927.5  | 83.3 | 2 K.TVLASDTHQR.I                 |
| *                 | HsHeLa_Control-MG_Ti_20  | 4.0873 | 0.3516 | 2162.55 | 2163.48 | 11083.4 | 1                                                                                       | 1219.9 | 52.8 | 2 R.LALLNVATQGVHLWDLQDR.V        |
| *                 | HsHeLa_Control-MG_Ti_20  | 3.6647 | 0.2758 | 2162.84 | 2163.48 | 6482.2  | 1                                                                                       | 1043.3 | 38.9 | 1 R.LALLNVATQGVHLWDLQDR.V        |
| *                 | HsHeLa_Control-MG_Ti_20  | 4.3623 | 0.2286 | 1580.65 | 1580.78 | 5639.5  | 1                                                                                       | 818    | 73.1 | 2 K.RSELPPIAELTGHTR.T            |
| gij15431303 ref N | 3                        | 7      | 0.156  | 192     | 21863   | 10 U    | ribosomal protein L9 [Homo sapiens]                                                     |        |      |                                  |
| gij67944630 ref N | 3                        | 7      | 0.156  | 192     | 21863   | 10 U    | ribosomal protein L9 [Homo sapiens]                                                     |        |      |                                  |
|                   | HsFLAG-Control_293_Ti_20 | 3.7277 | 0.4088 | 2113.59 | 2114.4  | 5346.6  | 1                                                                                       | 498.4  | 47.2 | 2 K.TILSNQTVDIPENVDITLK.G        |
|                   | Hs293FLP_TREX_Ti_104.1   | 3.0605 | 0.1702 | 1300.02 | 1299.51 | 6496.3  | 1                                                                                       | 1616.1 | 90   | 2 R.KFLDGIYVSEK.G                |
|                   | Hs293FLP_TREX_Ti_102.2   | 3.6884 | 0.289  | 1171.18 | 1171.34 | 3512.6  | 1                                                                                       | 734    | 83.3 | 3 K.FLDGIYVSEK.G                 |
| gij46249412 ref N | 13                       | 41     | 0.155  | 1396    | 152978  | 5.1 U   | latent transforming growth factor beta binding protein 1 isoform LTBP-1S [Homo sapiens] |        |      |                                  |
| gij46249414 ref N | 13                       | 41     | 0.126  | 1722    | 186838  | 6 U     | latent transforming growth factor beta binding protein 1 isoform LTBP-1L [Homo sapiens] |        |      |                                  |
|                   | HsF-IP-293-MG_Ti_106.199 | 3.503  | 0.2411 | 1406.69 | 1406.63 | 3791.5  | 3                                                                                       | 809.1  | 79.2 | 1 K.LCQIPVHGASVPK.L              |
|                   | Hs283FLP_Ti_102.2678.267 | 3.4824 | 0.3189 | 2475.79 | 2476.71 | 4636.5  | 1                                                                                       | 459.5  | 43.2 | 3 K.IGFGPDPTFSSCVDPPIVISEEK.G    |
|                   | Hs283FLP_Ti_103.1372.137 | 2.705  | 0.426  | 1815.12 | 1815.98 | 7578.8  | 1                                                                                       | 542.9  | 47.1 | 1 R.EHGPVGAPEVATAPPEK.E          |
|                   | Hs283FLP_Ti_104.1465.146 | 4.6682 | 0.3866 | 2206.88 | 2206.27 | 8566    | 1                                                                                       | 1353.3 | 61.8 | 2 K.CVDIDECTQVQHLCSSQGR.C        |
|                   | Hs283FLP_Ti_106.1612.161 | 2.6714 | 0.3461 | 1139.39 | 1139.19 | 4417    | 1                                                                                       | 626.9  | 81.2 | 2 R.HLCAHGQCR.N                  |
|                   | Hs283FLP_Ti_102.1470.147 | 4.4462 | 0.2513 | 1819.62 | 1819.92 | 7275.1  | 2                                                                                       | 1439.9 | 66.7 | 2 R.TSTDLDVDVDQPKKEK.K           |
|                   | Hs283FLP_Ti_102.1483.148 | 4.0318 | 0.4481 | 1786.64 | 1786.85 | 4775.6  | 1                                                                                       | 1112   | 67.6 | 2 K.GFVPAGESSEAGGENYK.D          |
|                   | HsF-IP-293-MG_Ti_102.222 | 4.3567 | 0.3366 | 1698.52 | 1698.8  | 5961.1  | 1                                                                                       | 1617   | 80.8 | 7 K.DADECLLFGQEICK.N             |
|                   | Hs283FLP_Ti_105.1567.156 | 4.0334 | 0.3604 | 2041.7  | 2040.14 | 6429    | 1                                                                                       | 713.9  | 53.3 | 1 K.NGFCLNTRPGYECYCK.Q           |
|                   | Hs283FLP_Ti_102.1907.190 | 3.9019 | 0.3297 | 1824.48 | 1824.91 | 4105.7  | 1                                                                                       | 576.8  | 60   | 1 K.DSDDYAQLCNIPVTGR.R           |
|                   | Hs283FLP_Ti_102.2997.299 | 5.5523 | 0.4632 | 2621.07 | 2620.79 | 4732.2  | 1                                                                                       | 642.1  | 50   | 11 R.DALVDFSEQYTPAEPYFIQDR.F     |
|                   | Hs283FLP_Ti_104.1672.167 | 3.9358 | 0.4819 | 2279.7  | 2280.34 | 6929    | 1                                                                                       | 719.8  | 47.2 | 4 R.VQEGYTCDCFDGYHLDTAK.M        |
|                   | Hs283FLP_Ti_103.2152.215 | 4.3156 | 0.4711 | 1748.55 | 1748.94 | 4905    | 1                                                                                       | 919.2  | 71.4 | 4 K.PNYCTPLNTALNLEK.D            |

|                          |        |        |         |         |         |        |                                                                                                          |
|--------------------------|--------|--------|---------|---------|---------|--------|----------------------------------------------------------------------------------------------------------|
| gi 13676857 ref NF       | 16     | 212    | 0.155   | 639     | 70021   | 5.7 U  | heat shock 70kDa protein 2 [Homo sapiens]                                                                |
| HsF-IP-293-MG_Ti_102.174 | 2.6315 | 0.2566 | 1487.66 | 1488.59 | 3419.2  | 1      | 176.5 58.3 2 R.TTPSYVAFTDTER.L                                                                           |
| Hs293FLP-MG_Ti_202.217   | 3.2886 | 0.3043 | 1487.89 | 1488.59 | 4372.6  | 1      | 860.7 83.3 12 R.TTPSYVAFTDTER.L                                                                          |
| HsFLAG-Control_HeLa_NE   | 3.2444 | 0.2808 | 1487.89 | 1488.59 | 4634.5  | 1      | 570.4 66.7 57 R.TTPSYVAFTDTER.L                                                                          |
| HsHeLa_Control-MG_Ti_20  | 2.4813 | 0.2055 | 1488.47 | 1488.59 | 3249.8  | 1      | 121.1 50 1 R.TTPSYVAFTDTER.L                                                                             |
| HsHeLa_Control-MG_Ti_20  | 3.6044 | 0.4296 | 1489.1  | 1488.59 | 3675.9  | 1      | 589.8 75 9 R.TTPSYVAFTDTER.L                                                                             |
| HsFLAG-MOCK_300mM_T      | 3.2112 | 0.1491 | 2159.14 | 2157.39 | 6487.7  | 1      | 523.9 44.7 2 R.TTPSYVAFTDTERLIGDAAK.N                                                                    |
| Hs293FLP_TREX_Ti_103.1   | 3.1894 | 0.2192 | 1181.34 | 1181.33 | 4945.8  | 3      | 857.3 83.3 5 K.VQVEYKGETK.T                                                                              |
| HsHeLa_Control-MG_Ti_20  | 5.5061 | 0.3911 | 1661.88 | 1660.91 | 4282.5  | 1      | 1591.7 86.7 75 R.IINEPTAAAIAYGLDK.K                                                                      |
| HsFlag1P_Ti_105.2426.242 | 5.1147 | 0.1386 | 1787.95 | 1789.08 | 4898.2  | 1      | 1086.6 71.9 5 R.IINEPTAAAIAYGLDK.K                                                                       |
| HsFLAG-Control_HeLa_NE   | 4.6091 | 0.1001 | 2984.32 | 2985.23 | 10226   | 2      | 1524.2 32.7 1 R.TLSSSTQASIEIDSLYEGVDFYTSITR.A                                                            |
| HsGST-MOCK_Ti_102.194    | 4.0503 | 0.2122 | 1481.42 | 1481.65 | 6150.3  | 2      | 1322.4 54.5 2 R.ARFEELNADLFR.G                                                                           |
| HsGST-MOCK_Ti_404.268    | 3.9815 | 0.2532 | 1481.49 | 1481.65 | 5240.4  | 1      | 1202.9 86.4 2 R.ARFEELNADLFR.G                                                                           |
| HsHeLa_Control-MG_Ti_10  | 4.2431 | 0.2761 | 1483.66 | 1481.65 | 4363.8  | 1      | 928.3 81.8 24 R.ARFEELNADLFR.G                                                                           |
| HsFLAG-Control_HeLa_S10  | 3.8164 | 0.214  | 1254.28 | 1254.39 | 7085    | 1      | 1542.2 88.9 7 R.FEELNADLFR.G                                                                             |
| HsFLAG-Control_MG_293_   | 3.1449 | 0.1938 | 1082.22 | 1082.24 | 5278.9  | 5      | 835.3 87.5 7 K.LLQDFFNGK.E                                                                               |
| HsFLAG-MOCK_300mM_T      | 3.5405 | 0.2578 | 1568.26 | 1566.8  | 8502.8  | 1      | 1323.3 75 1 K.LLQDFFNGKELNK.S                                                                            |
| gi 4826862 ref NF        | 2      | 2      | 0.155   | 187     | 20659   | 10.3 U | nucleoside-diphosphate kinase 4 [Homo sapiens]                                                           |
| Hs293FLP-MG_Ti_105.143   | 3.4179 | 0.2189 | 1284.79 | 1283.51 | 4534.9  | 1      | 880 77.3 1 R.TLVAVKPDGVQR.R                                                                              |
| Hs293FLP-MG_Ti_304.138   | 3.0968 | 0.3867 | 1698.44 | 1698.89 | 8098.2  | 1      | 1065.5 56.2 1 R.AMIGHTDSAEAAPGTIR.G                                                                      |
| gi 4826998 ref NF        | 11     | 35     | 0.154   | 707     | 76150   | 9.4 U  | splicing factor proline/glutamine rich (polypyrimidine tract binding protein associated) [Homo sapiens]  |
| HsFLAG-Control_293_Ti_20 | 4.2244 | 0.372  | 1810.15 | 1809.03 | 3696.5  | 1      | 504.7 63.3 5 R.LFVGNLPADITEDEFK.R                                                                        |
| HsFLAG-Control_HeLa_NE   | 3.1474 | 0.2683 | 1254.54 | 1253.4  | 4158.5  | 1      | 576.2 75 2 K.YGEPGEVFINK.G                                                                               |
| HsFLAG-Control_293_Ti_20 | 4.8003 | 0.4253 | 2639.96 | 2640.91 | 9649.3  | 1      | 1376.2 50 6 R.NLSPYVSNELLEAFSQFGPIER.A                                                                   |
| HsFLAG-Control_HeLa_NE   | 4.0997 | 0.3289 | 2642.23 | 2640.91 | 8669.7  | 1      | 1157.5 33 1 R.NLSPYVSNELLEAFSQFGPIER.A                                                                   |
| HsHeLa3_Ti_103.4375.437  | 4.7169 | 0.4149 | 2642.68 | 2640.91 | 8889.4  | 1      | 1350.5 50 4 R.NLSPYVSNELLEAFSQFGPIER.A                                                                   |
| HsFLAG-Control_293_Ti_10 | 4.4459 | 0.2249 | 3598.96 | 3598.99 | 10027.8 | 4      | 581.1 21.8 4 R.CSEGVFLLTTTPRPVIVEPLEQLDDEDGLPEK.L                                                        |
| HsFLAG-Control_293_Ti_20 | 3.1756 | 0.277  | 2135.27 | 2136.36 | 8622.2  | 1      | 439.8 41.7 1 R.PVIVEPLEQLDDEDGLPEK.L                                                                     |
| HsGST-MOCK_Ti_103.118    | 3.4426 | 0.3363 | 1572.67 | 1573.78 | 8317.7  | 1      | 949.7 68.2 1 R.RMEELHNQEMQK.R                                                                            |
| HsFLAG-Control_293_Ti_20 | 2.7436 | 0.2833 | 1341.61 | 1342.46 | 4825.8  | 4      | 281.2 50 1 R.FGQGGAGPVGQGGPR.G                                                                           |
| HsFLAG-Control_HeLa_NE   | 4.3282 | 0.3946 | 1342.06 | 1342.46 | 6865.2  | 1      | 1473.6 75 9 R.FGQGGAGPVGQGGPR.G                                                                          |
| HsFLAG-Control_293_Ti_20 | 3.11   | 0.3301 | 1342.51 | 1342.46 | 7509.4  | 1      | 722.7 57.1 1 R.FGQGGAGPVGQGGPR.G                                                                         |
| gi 4502099 ref NF        | 7      | 23     | 0.154   | 298     | 32895   | 9.7 U  | solute carrier family 25, member 5 [Homo sapiens]                                                        |
| HsFLAG-Control_293_Ti_10 | 3.3296 | 0.2947 | 1219.6  | 1220.41 | 9431    | 1      | 1058.7 62.5 6 K.DFLAGGVAAAISK.T                                                                          |
| HsFLAG-Control_293_Ti_20 | 4.1722 | 0.2789 | 1220.21 | 1220.41 | 6844.3  | 1      | 2272.7 87.5 5 K.DFLAGGVAAAISK.T                                                                          |
| HsFLAG-Control_293_Ti_20 | 2.5345 | 0.1512 | 1136.47 | 1137.37 | 6396.6  | 1      | 520.4 66.7 3 K.LLLQVQHASK.Q                                                                              |
| HsFLAG-Control_293_Ti_20 | 2.8322 | 0.1474 | 1446.65 | 1447.68 | 5163.2  | 1      | 536.7 63.6 2 R.YFPTQALNFAFK.D                                                                            |
| HsFLAG-Control_293_Ti_10 | 3.4801 | 0.3843 | 1447.1  | 1447.68 | 4956.3  | 1      | 680.8 72.7 4 R.YFPTQALNFAFK.D                                                                            |
| HsFLAG-Control_293_Ti_20 | 3.4134 | 0.2708 | 1447.39 | 1447.68 | 4739.5  | 1      | 896.4 86.4 2 R.YFPTQALNFAFK.D                                                                            |
| HsFLAG-Control_MG_293_   | 2.8649 | 0.2453 | 1219.37 | 1220.37 | 8036.7  | 3      | 575.7 55 1 R.AAYFGIYDTAK.G                                                                               |
| gi 21464101 ref NF       | 3      | 4      | 0.154   | 247     | 28303   | 4.9 U  | tyrosine 3-monooxygenase/tryptophan 5-monooxygenase activation protein, gamma polypeptide [Homo sapiens] |
| HsHeLa3_Ti_103.5064.506  | 4.4654 | 0.305  | 2237.03 | 2236.53 | 6999.6  | 1      | 1691.9 43.1 1 K.ELEAVCQDVLSSLDNYLIK.N                                                                    |
| HsHeLa3_Ti_103.5058.505  | 2.9923 | 0.1947 | 2238.08 | 2236.53 | 6423.7  | 1      | 899.4 52.8 1 K.ELEAVCQDVLSSLDNYLIK.N                                                                     |
| HsFLAG-Control_HeLa_S10  | 4.7093 | 0.4059 | 2131.54 | 2132.24 | 6878.9  | 1      | 1378.7 61.1 2 K.TAFDDAIAELDTLNEDSYK.D                                                                    |
| gi 12667788 ref NF       | 24     | 75     | 0.153   | 1960    | 226530  | 5.6 U  | myosin, heavy polypeptide 9, non-muscle [Homo sapiens]                                                   |
| HsHeLa_Control-MG_Ti_10  | 5.1101 | 0.2353 | 1675.31 | 1673.87 | 5282.9  | 1      | 1214.6 78.6 6 K.NFINNPLAQADWAAK.K                                                                        |
| HsFLAG-Control_Hela_Ti_1 | 4.0065 | 0.3395 | 1479.41 | 1479.72 | 8161.6  | 1      | 1474.1 75 2 K.VIQYLAYVASSHK.S                                                                            |
| HsFLAG-MOCK_150mM_T      | 5.0454 | 0.3401 | 1487.6  | 1487.83 | 8285.6  | 1      | 2280 80.8 8 R.VISGVLQLGNIVFK.K                                                                           |
| HsFLAG-MOCK_150mM_T      | 3.6062 | 0.3746 | 1615.84 | 1616    | 6821.1  | 1      | 967.3 64.3 1 R.VISGVLQLGNIVFKK.E                                                                         |

|                     |                          |        |        |         |         |         |       |        |      |                                                                                  |
|---------------------|--------------------------|--------|--------|---------|---------|---------|-------|--------|------|----------------------------------------------------------------------------------|
| *                   | HsHeLa_Control_Ti_106.32 | 3.7069 | 0.2745 | 1574.83 | 1572.81 | 5305.9  | 1     | 1197.7 | 73.1 | 5 K.VSHLLGINVDFTR.G                                                              |
| *                   | HsFLAG-Control_Hela_Ti_1 | 5.2973 | 0.3894 | 2033.92 | 2035.13 | 7879.5  | 1     | 1697.9 | 68.8 | 4 R.ELESQISELQEDLESER.A                                                          |
| *                   | Hs293FLP-MG_Ti_204.005   | 3.5393 | 0.1898 | 3021.45 | 3019.24 | 9337.3  | 1     | 1115.9 | 28.8 | 1 R.DLGEELKTELEDTLSTAAQQELR.S                                                    |
| *                   | HsFLAG-Control_Hela_Ti_1 | 6.0207 | 0.3866 | 1920.51 | 1921.03 | 10202.6 | 1     | 3097   | 78.1 | 1 K.TELEDTLSTAAQQELR.S                                                           |
| *                   | HsFLAG-MOCK_150mM_T      | 3.3436 | 0.186  | 1730.68 | 1730.87 | 5288.3  | 2     | 475    | 57.1 | 1 K.QTLENERGELANEVK.V                                                            |
| *                   | HsFLAG-MOCK_300mM_T      | 2.6797 | 0.1487 | 1311.81 | 1311.48 | 7657.2  | 3     | 703.9  | 63.6 | 1 K.VLLQKGKDSEHK.R                                                               |
| *                   | HsFLAG-MOCK_150mM_T      | 5.8352 | 0.4857 | 1946.68 | 1947.15 | 6967.4  | 1     | 2162   | 76.5 | 6 K.LQVELDNVTGLLSQSDSK.S                                                         |
| *                   | HsHeLa_Control-MG_Ti_20  | 5.1528 | 0.2831 | 2493.5  | 2494.63 | 10534.5 | 1     | 1317.8 | 52.5 | 3 K.DFSALESQLQDQTQELLQEENR.Q                                                     |
| *                   | HsFLAG-MOCK_150mM_T      | 4.8836 | 0.3071 | 2494.08 | 2494.63 | 10742   | 1     | 2617.2 | 43.8 | 1 K.DFSALESQLQDQTQELLQEENR.Q                                                     |
| *                   | HsFLAG-MOCK_150mM_T      | 5.9822 | 0.3374 | 2494.14 | 2494.63 | 9095.5  | 1     | 2119.1 | 62.5 | 12 K.DFSALESQLQDQTQELLQEENR.Q                                                    |
| *                   | HsFLAG-MOCK_300mM_T      | 4.6889 | 0.2142 | 2208.9  | 2208.44 | 6022.9  | 2     | 1941.8 | 51.5 | 3 K.TRLQQELDDLVDLDHQR.Q                                                          |
| *                   | HsFLAG-MOCK_150mM_T      | 2.7559 | 0.3581 | 1949.71 | 1951.14 | 8978.6  | 1     | 758.9  | 56.7 | 1 R.LQQELDDLVDLDHQR.Q                                                            |
| *                   | HsFLAG-Control_Hela_Ti_1 | 4.7548 | 0.4555 | 1962.12 | 1963.06 | 8836.7  | 1     | 1809.5 | 68.8 | 5 K.TLQEELEDELQATEDAK.L                                                          |
| *                   | HsFLAG-MOCK_150mM_T      | 2.6909 | 0.2741 | 1379.24 | 1379.48 | 6448    | 2     | 628.4  | 65   | 1 R.EMEALEDERK.Q                                                                 |
| *                   | HsFLAG-MOCK_150mM_T      | 3.8489 | 0.3172 | 1213.31 | 1213.29 | 7510.2  | 1     | 1451.4 | 80   | 1 K.DLEAHIDSANK.N                                                                |
| *                   | HsFLAG-MOCK_300mM_T      | 3.4733 | 0.3529 | 1717.02 | 1716.89 | 7924.2  | 1     | 849.5  | 53.6 | 1 R.ASREEILAQAKENEK.K                                                            |
| *                   | HsFLAG-MOCK_150mM_T      | 6.6273 | 0.4156 | 2473.76 | 2473.61 | 9757.6  | 1     | 2579   | 65   | 6 R.IAQLLEEELEEEQGNETELINDR.L                                                    |
| *                   | HsFLAG-MOCK_150mM_T      | 4.5105 | 0.3057 | 1531.32 | 1531.66 | 8992.5  | 1     | 2112   | 79.2 | 2 K.IAQLLEEQLDNETK.E                                                             |
| *                   | HsFLAG-MOCK_150mM_T      | 4.4938 | 0.1554 | 1489.64 | 1488.55 | 8355    | 1     | 1646.9 | 81.8 | 1 K.RQLEEAEEEAQR.A                                                               |
| *                   | HsFLAG-MOCK_150mM_T      | 4.7206 | 0.4722 | 1566.42 | 1566.64 | 9537.1  | 1     | 1743.6 | 73.1 | 2 R.ELEDATETADAMNR.E                                                             |
| gij 41327764 ref NF |                          | 3      | 3      | 0.153   | 359     | 39589   | 7.2 U |        |      | aldo-keto reductase family 7, member A2 [Homo sapiens]                           |
| *                   | HsHeLa_Control-MG_Ti_20  | 3.7599 | 0.3185 | 3431.74 | 3433.74 | 7950.2  | 1     | 782.9  | 28.6 | 1 R.LQCPQVDLFYLHAPDHGTPVEETLHACQR.L                                              |
| *                   | HsHeLa_Control-MG_Ti_20  | 4.5622 | 0.3951 | 1585.91 | 1585.84 | 5708    | 1     | 1290.6 | 78.6 | 1 R.FYAYNPLAGGLLTGK.Y                                                            |
| *                   | Hs293FLP_TREX_Ti_104.2   | 3.477  | 0.3636 | 1378.3  | 1378.49 | 7284.2  | 1     | 1143.4 | 80   | 1 R.FFGNSWAETYR.N                                                                |
| gij 4504809 ref NF  |                          | 2      | 3      | 0.153   | 347     | 35879   | 9.2 U |        |      | jun B proto-oncogene [Homo sapiens]                                              |
| *                   | HsFLAG-MOCK_300mM_T      | 3.4873 | 0.4737 | 2227.7  | 2228.29 | 7899.9  | 1     | 605.4  | 37.5 | 2 R.GPGPEGGGGGSYFGQGSDDTGASLK.L                                                  |
| *                   | HsHeLa3_Ti_102.2097.209  | 3.943  | 0.3451 | 2413.08 | 2413.48 | 7850.9  | 1     | 769.8  | 40.7 | 1 R.GGGSGGGAGGAGGGVTEEQEGFADGFVK.A                                               |
| gij 4507185 ref NF  |                          | 2      | 8      | 0.153   | 261     | 28048   | 8 U   |        |      | sepiapterin reductase (7,8-dihydrobiopterin:NADP+ oxidoreductase) [Homo sapiens] |
| *                   | HsFLAG-Control_HeLa_NE   | 4.2477 | 0.4008 | 2079.82 | 2079.53 | 6746.5  | 1     | 870    | 50   | 3 R.TLAPLLASLLSPGSVLLVSAR.N                                                      |
| *                   | HsFLAG-Control_HeLa_S10  | 6.2898 | 0.4431 | 1893.05 | 1893.19 | 8621.2  | 1     | 2748.4 | 75   | 5 R.VPADLGAEAGLQQLLALR.E                                                         |
| gij 66933016 ref NF |                          | 5      | 9      | 0.152   | 514     | 55805   | 6.9 U |        |      | inosine monophosphate dehydrogenase 2 [Homo sapiens]                             |
| *                   | HsHeLa_Control-MG_Ti_20  | 4.4733 | 0.3721 | 1822.13 | 1822.11 | 6360.3  | 1     | 1160.8 | 70   | 2 K.KYEQGFITDPVVLSPK.D                                                           |
| *                   | HsHeLa_Control-MG_Ti_20  | 3.8213 | 0.3891 | 1432.58 | 1431.56 | 7455.9  | 1     | 971.9  | 66.7 | 2 R.HGFCGIPITDTGR.M                                                              |
| *                   | HsHeLa_Control-MG_Ti_20  | 4.2236 | 0.4081 | 1892.28 | 1893.2  | 8406.1  | 1     | 1222.4 | 58.3 | 2 R.FGVPVIADGGIQNVGHIK.A                                                         |
| *                   | HsHeLa_Control-MG_Ti_20  | 3.5115 | 0.3435 | 1159.34 | 1159.29 | 6595.2  | 1     | 1375.9 | 81.8 | 2 K.VAQQVSGAVQDK.G                                                               |
| *                   | HsHeLa_Control-MG_Ti_20  | 4.4766 | 0.4522 | 1917.37 | 1917.04 | 10041.2 | 1     | 1710.9 | 61.8 | 1 R.TSSAQVEGGVHSLHSYEK.R                                                         |
| gij 4506439 ref NF  |                          | 4      | 15     | 0.151   | 425     | 47820   | 5 U   |        |      | retinoblastoma binding protein 7 [Homo sapiens]                                  |
| *                   | HsFLAG-Control_HeLa_NE   | 4.2739 | 0.3794 | 1472.49 | 1472.64 | 7189.3  | 1     | 1236.3 | 75   | 11 K.TPSSDVLVFDYTK.H                                                             |
| *                   | HsGST-MOCK_Ti_103.120    | 3.0017 | 0.3277 | 1791.4  | 1790.9  | 4904.7  | 1     | 630.3  | 60   | 1 K.HPAKPDPSGECNPDLR.L                                                           |
| *                   | Hs293FLP_TREX_Ti_102.2   | 2.5042 | 0.1334 | 974.95  | 974.148 | 4357.2  | 7     | 580.5  | 78.6 | 1 K.TVALWDLR.N                                                                   |
| *                   | HsGST-MOCK_Ti_102.191    | 4.9255 | 0.4001 | 2848.2  | 2849.04 | 6715.9  | 1     | 1416.4 | 34.6 | 2 K.IGEEQSAEDAEDGPPPELLFIHGHTAK.I                                                |
| gij 7657649 ref NF  |                          | 3      | 12     | 0.151   | 352     | 39595   | 5.2 U |        |      | tropomodulin 3 (ubiquitous) [Homo sapiens]                                       |
| *                   | HsFLAG-Control_Hela_Ti_1 | 5.4409 | 0.415  | 1934.99 | 1934.06 | 6207.5  | 1     | 1710.1 | 78.1 | 6 K.DLDEDELLGNLSETELK.Q                                                          |
| *                   | HsFLAG-Control_Hela_Ti_1 | 4.5361 | 0.4521 | 2326    | 2327.6  | 7553.5  | 1     | 1034.6 | 55   | 4 K.QLETVLDDLDPENALLPAGFR.Q                                                      |
| *                   | HsFLAG-Control_Hela_Ti_1 | 3.5087 | 0.3538 | 1722.88 | 1722.9  | 8482.4  | 1     | 745.9  | 53.6 | 2 K.ENDAHLVEVNLNNIK.N                                                            |
| gij 5031877 ref NF  |                          | 6      | 15     | 0.15    | 586     | 66408   | 5.2 U |        |      | lamin B1 [Homo sapiens]                                                          |
| *                   | HsFLAG-Control_293_Ti_20 | 3.4317 | 0.2513 | 1415.28 | 1415.59 | 9053.9  | 1     | 1240.2 | 72.7 | 1 K.AEHDQLLLNYAK.K                                                               |
| *                   | HsFLAG-Control_293_Ti_20 | 3.536  | 0.2419 | 1293.98 | 1294.45 | 7853.9  | 1     | 1283.7 | 80   | 1 K.LREYEAALNSK.D                                                                |
| *                   | HsFLAG-Control_293_Ti_20 | 3.2742 | 0.2515 | 1069.34 | 1069.27 | 6847.5  | 1     | 1359.8 | 93.8 | 1 K.LAQALHEMR.E                                                                  |

|                 |                          |        |        |         |         |         |     |        |      |     |                                                                           |
|-----------------|--------------------------|--------|--------|---------|---------|---------|-----|--------|------|-----|---------------------------------------------------------------------------|
| *               | HsFLAG-Control_293_Ti_2( | 4.0552 | 0.4124 | 1499.12 | 1497.62 | 8414.6  | 1   | 1531.8 | 73.1 | 7   | R.LSSEMNTSTVNSAR.E                                                        |
| *               | HsFLAG-Control_293_Ti_2( | 4.8185 | 0.3536 | 2108.26 | 2109.32 | 9163.6  | 1   | 1919.9 | 68.8 | 3   | R.DQMQQQLNDYEQLLDVK.L                                                     |
| *               | HsFLAG-Control_293_Ti_1( | 3.5086 | 0.2444 | 2572.56 | 2569.92 | 7410.4  | 5   | 427.2  | 33.3 | 2   | K.AGQTVTIWAANAGVTASPTDLIWK.N                                              |
| gi 46367787 ref |                          | 8      | 17     | 0.149   | 636     | 70671   | 9.5 | U      |      |     | poly(A) binding protein, cytoplasmic 1 [Homo sapiens]                     |
|                 | Hs283FLP_Ti_102.2047.20  | 5.1031 | 0.4609 | 1929.1  | 1930.08 | 6525.8  | 1   | 1508.8 | 68.8 | 4   | R.SLGYAYVNFQQPADAER.A                                                     |
|                 | HsFLAG-Control_MG_293_   | 2.7317 | 0.2852 | 1267.36 | 1267.48 | 6619.4  | 2   | 691.1  | 70   | 1   | R.ALDTMNFVVIK.G                                                           |
|                 | HsFlag1P_Ti_105.3641.364 | 3.1412 | 0.1714 | 1808.78 | 1808.01 | 8318    | 1   | 898.9  | 56.7 | 1   | K.ALYDTFSAFGNILSCK.V                                                      |
|                 | Hs293FLP_TREX_Ti_104.2   | 2.9705 | 0.1917 | 1045.69 | 1046.17 | 7007.6  | 5   | 864    | 75   | 3   | K.GFGFVSFER.H                                                             |
| *               | Hs293FLP_TREX_Ti_102.2   | 3.1513 | 0.3725 | 1286.53 | 1285.44 | 8382.9  | 2   | 826.1  | 63.6 | 1   | K.EFSPFGTITSAK.V                                                          |
|                 | Hs283FLP_Ti_106.2165.21  | 3.8984 | 0.424  | 1543.84 | 1543.89 | 2877.8  | 1   | 521.4  | 73.1 | 5   | R.IVATKPLYVALAQR.K                                                        |
|                 | Hs283FLP_Ti_104.1603.16  | 3.028  | 0.1035 | 1031.54 | 1031.24 | 4323    | 1   | 1394.3 | 93.8 | 1   | K.PLYVALAQR.K                                                             |
|                 | Hs283FLP_Ti_106.2067.20  | 4.1431 | 0.5246 | 1694.7  | 1694.93 | 7289.5  | 1   | 1770.6 | 76.7 | 1   | R.SKVDEAVAVLQAHQAK.E                                                      |
| gi 23397427 ref |                          | 5      | 6      | 0.149   | 623     | 69633   | 8.6 | U      |      |     | synaptotagmin binding, cytoplasmic RNA interacting protein [Homo sapiens] |
| *               | HsHeLa3_Ti_103.2372.237  | 3.2538 | 0.2468 | 2568.03 | 2567.81 | 7268.9  | 4   | 335.6  | 31.2 | 1   | K.YGGPPPSVYSGQQPSVGTIFVVGK.I                                              |
| *               | HsHeLa3_Ti_102.4035.403  | 3.4629 | 0.18   | 1596.57 | 1594.8  | 4357.6  | 9   | 804.3  | 75   | 1   | R.DLFEDELVPLFEK.A                                                         |
| *               | HsHeLa3_Ti_102.3367.336  | 2.882  | 0.0913 | 2657.92 | 2655.94 | 5716.4  | 1   | 431.2  | 37   | 1   | K.VWGNVGTVEWADPIEDPDPEVMAK.V                                              |
| *               | HsHeLa3_Ti_103.2758.275  | 4.31   | 0.3052 | 1474.9  | 1474.65 | 6035.1  | 1   | 1579.2 | 87.5 | 2   | R.NLANTVTEEILEK.A                                                         |
| *               | HsFLAG-Control_HeLa_NE   | 2.7632 | 0.1794 | 2043.02 | 2043.28 | 12878.7 | 4   | 741.3  | 44.1 | 1   | K.DLEGENIEIVFAKPPDQK.R                                                    |
| gi 19923142 ref |                          | 9      | 40     | 0.148   | 876     | 97170   | 4.8 | U      |      |     | karyopherin beta 1 [Homo sapiens]                                         |
| *               | HsFLAG-Control_HeLa_NE   | 3.6524 | 0.1169 | 1557.78 | 1557.74 | 8552.9  | 1   | 952    | 57.7 | 3   | K.TVSPDRLELEAAQK.F                                                        |
| *               | HsFLAG-Control_HeLa_S1(  | 4.1744 | 0.3428 | 1659.92 | 1659.92 | 4484.8  | 1   | 830.3  | 71.4 | 10  | R.AAVENLPTFLVELSR.V                                                       |
| *               | HsFLAG-Control_HeLa_NE   | 3.2671 | 0.3052 | 1226.15 | 1226.38 | 4696    | 2   | 669.8  | 72.7 | 2   | R.VLANPGNSQVAR.V                                                          |
| *               | HsHeLa3_Ti_103.1471.147  | 2.2181 | 0.0899 | 799.73  | 799.989 | 6439.2  | 3   | 428.4  | 64.3 | 1   | R.VAAGLQIK.N                                                              |
| *               | HsFLAG-Control_HeLa_S1(  | 4.0562 | 0.3448 | 2566.47 | 2566.74 | 8532.2  | 1   | 1388.4 | 52.4 | 3   | K.ESTLEAIGYICQDIDPEQLQDK.S                                                |
| *               | HsFLAG-Control_HeLa_NE   | 5.2373 | 0.436  | 1606.44 | 1606.86 | 7304.9  | 1   | 1597.3 | 75   | 11  | K.LAATNALLNSLEFTK.A                                                       |
| *               | HsFLAG-Control_HeLa_NE   | 2.6397 | 0.0839 | 957.5   | 956.173 | 4543.4  | 1   | 964.5  | 87.5 | 1   | R.VAALQNLVK.I                                                             |
| *               | HsFLAG-Control_HeLa_S1(  | 2.7132 | 0.2041 | 1760.03 | 1760.13 | 3989.2  | 4   | 507.5  | 60   | 1   | K.GALQYLVPILTQTLTK.Q                                                      |
| *               | HsFLAG-Control_HeLa_NE   | 6.2736 | 0.2997 | 2147.91 | 2148.42 | 12014   | 1   | 3095.1 | 69.4 | 8   | K.YLEVVLNLTQQASQAQVVK.S                                                   |
| gi 89036402 ref |                          | 7      | 159    | 0.148   | 229     | 25758   | 7.5 | U      |      |     | PREDICTED: similar to ubiquitin C isoform 5 [Homo sapiens]                |
| gi 89036412 ref |                          | 7      | 106    | 0.128   | 266     | 29892   | 6.9 | U      |      |     | PREDICTED: similar to ubiquitin C isoform 10 [Homo sapiens]               |
| gi 89036410 ref |                          | 7      | 159    | 0.148   | 229     | 25758   | 7.5 | U      |      |     | PREDICTED: similar to ubiquitin C isoform 9 [Homo sapiens]                |
| gi 89036408 ref |                          | 7      | 265    | 0.089   | 381     | 42851   | 7.6 | U      |      |     | PREDICTED: similar to CG11624-PA, isoform A isoform 8 [Homo sapiens]      |
| gi 89036406 ref |                          | 7      | 159    | 0.148   | 229     | 25758   | 7.5 | U      |      |     | PREDICTED: similar to ubiquitin C isoform 7 [Homo sapiens]                |
| gi 89036404 ref |                          | 7      | 265    | 0.089   | 381     | 42851   | 7.6 | U      |      |     | PREDICTED: similar to CG11624-PA, isoform A isoform 6 [Homo sapiens]      |
|                 | Hs293FLP-MG_Ti_202.258   | 4.3083 | 0.411  | 1788.48 | 1788.99 | 4421.5  | 1   | 681.2  | 63.3 | 102 | K.TITLEVEPSDTIENVK.A                                                      |
|                 | HsHeLa3_Ti_102.1529.152  | 2.7201 | 0.1339 | 1082.66 | 1082.2  | 2593.8  | 1   | 450.9  | 87.5 | 3   | R.TLSDYNIQK.E                                                             |
|                 | Hs293FLP_TREX_Ti_105.1   | 2.0576 | 0.1817 | 1067.59 | 1068.26 | 3276.1  | 1   | 269.3  | 68.8 | 3   | K.ESTLHLVLR.L                                                             |
|                 | HsFLAG-Control_MG_293_   | 3.1018 | 0.2925 | 1068.16 | 1068.26 | 4626.9  | 1   | 630.1  | 87.5 | 6   | K.ESTLHLVLR.L                                                             |
|                 | HsFLAG-Control_HeLa_S1(  | 2.918  | 0.1872 | 1068.33 | 1068.26 | 5493    | 2   | 625.2  | 81.2 | 24  | K.ESTLHLVLR.L                                                             |
|                 | Hs293FLP_TREX_Ti_105.1   | 3.0039 | 0.2609 | 1068.5  | 1068.26 | 3971.6  | 1   | 573.1  | 87.5 | 18  | K.ESTLHLVLR.L                                                             |
|                 | HsFLAG-Control_MG_293_   | 2.5598 | 0.2377 | 1068.52 | 1068.26 | 4043.5  | 2   | 291.4  | 68.8 | 3   | K.ESTLHLVLR.L                                                             |
| gi 89037890 ref |                          | 8      | 12     | 0.147   | 600     | 64322   | 7.4 | U      |      |     | PREDICTED: similar to Ig gamma-1 chain C region [Homo sapiens]            |
|                 | HsHeLa3_Ti_106.2298.229  | 2.9503 | 0.2269 | 1288.79 | 1288.46 | 3622.9  | 8   | 436.8  | 63.6 | 1   | K.GPSVFPLAPCSR.S                                                          |
|                 | HsHeLa3_Ti_103.1746.174  | 2.5563 | 0.3299 | 1321.66 | 1322.47 | 7795.4  | 1   | 499.3  | 53.8 | 2   | R.STSGGTAALGCLVK.D                                                        |
|                 | HsHeLa3_Ti_103.1754.175  | 3.6033 | 0.3401 | 1322.93 | 1322.47 | 8426.5  | 1   | 1064.8 | 65.4 | 1   | R.STSGGTAALGCLVK.D                                                        |
| *               | HsHeLa3_Ti_105.1295.129  | 3.4049 | 0.4566 | 1358.41 | 1356.44 | 7171.4  | 1   | 948.4  | 68.2 | 3   | K.TPLGDTTHTCPR.C                                                          |
|                 | HsHeLa3_Ti_106.2848.285  | 3.5599 | 0.1238 | 1807.18 | 1809.12 | 6064.8  | 1   | 918.8  | 60   | 1   | R.VVSVLTVLHQDWLNGK.E                                                      |
|                 | HsHeLa3_Ti_104.1455.145  | 2.1475 | 0.1794 | 838.63  | 839.023 | 2547.7  | 4   | 356.7  | 78.6 | 1   | K.ALPAPIEK.T                                                              |
|                 | HsHeLa3_Ti_104.1648.164  | 2.7077 | 0.2801 | 1907.07 | 1906.16 | 3939.2  | 3   | 306.7  | 50   | 2   | R.EPQVYTLPPSREEMTK.N                                                      |

|                 |                          |        |        |         |         |         |      |        |                                                                                                   |    |                                     |
|-----------------|--------------------------|--------|--------|---------|---------|---------|------|--------|---------------------------------------------------------------------------------------------------|----|-------------------------------------|
|                 | HsHeLa3_Ti_103.1878.187  | 2.5117 | 0.1298 | 1161.73 | 1162.34 | 4608.6  | 9    | 333.8  | 66.7                                                                                              | 1  | K.NQVSLTCLVK.G                      |
| gi 27436969 ref |                          | 4      | 6      | 0.147   | 353     | 39287   | 8.6  | U      | potassium voltage-gated channel, shaker-related subfamily, beta member 2 isoform 2 [Homo sapiens] |    |                                     |
| gi 4504825 ref  |                          | 4      | 6      | 0.142   | 367     | 41000   | 9    | U      | potassium voltage-gated channel, shaker-related subfamily, beta member 2 isoform 1 [Homo sapiens] |    |                                     |
|                 | HsHeLa_Control-MG_Ti_10  | 3.7891 | 0.2983 | 1596.96 | 1596.87 | 6426.7  | 1    | 797.3  | 66.7                                                                                              | 2  | R.EKVEVQLPELFHK.I                   |
|                 | HsHeLa_Control-MG_Ti_10  | 2.8924 | 0.4575 | 1904.93 | 1905.23 | 5172    | 1    | 495.2  | 44.4                                                                                              | 1  | K.IGVGAMTWSPLACGIVSGK.Y             |
|                 | HsHeLa_Control-MG_Ti_10  | 4.1189 | 0.24   | 2200.96 | 2202.51 | 6152.4  | 2    | 600.4  | 32.9                                                                                              | 1  | K.LSSIIHEIDSILGNKPYSK.K             |
|                 | HsHeLa_Control-MG_Ti_10  | 3.9108 | 0.3159 | 2203.94 | 2202.51 | 8779.1  | 1    | 1193   | 50                                                                                                | 2  | K.LSSIIHEIDSILGNKPYSK.K             |
| gi 5031569 ref  |                          | 3      | 14     | 0.146   | 376     | 42614   | 6.6  | U      | ARP1 actin-related protein 1 homolog A, centractin alpha [Homo sapiens]                           |    |                                     |
| *               | HsFLAG-Control_HeLa_S1(  | 4.2272 | 0.3551 | 2534.87 | 2535.82 | 8689.8  | 1    | 763    | 45.2                                                                                              | 2  | K.DQLQTFSEEHPVLLTEAPLNPR.K          |
| *               | HsFLAG-Control_HeLa_NE   | 3.615  | 0.3851 | 1867.2  | 1868.05 | 5070.5  | 1    | 893.6  | 65.6                                                                                              | 3  | K.AQYYLPDGSTIEIGPSR.F               |
| *               | HsFLAG-Control_HeLa_S1(  | 5.0607 | 0.3775 | 1685.92 | 1684.97 | 8231    | 1    | 1713.8 | 73.3                                                                                              | 9  | R.TLFSNIVLSSGGSTLFG.G               |
| gi 4757880 ref  |                          | 2      | 2      | 0.146   | 328     | 37155   | 6.8  | U      | BUB3 budding uninhibited by benzimidazoles 3 isoform a [Homo sapiens]                             |    |                                     |
| gi 56550081 ref |                          | 2      | 2      | 0.147   | 326     | 36955   | 6.8  | U      | BUB3 budding uninhibited by benzimidazoles 3 isoform b [Homo sapiens]                             |    |                                     |
|                 | HsGST-MOCK_Ti_103.215    | 4.1084 | 0.3337 | 3188.83 | 3189.44 | 9160.9  | 1    | 918.2  | 28.7                                                                                              | 1  | K.YQHTGAVLDCAFYDPTHAWSGGLDHLK.M     |
|                 | HsGST-MOCK_Ti_102.154    | 3.9301 | 0.3113 | 2277.59 | 2277.47 | 7783.1  | 1    | 1013.5 | 36.8                                                                                              | 1  | K.MHDLNTDQENLVGTHDAPIR.C            |
| gi 8922498 ref  |                          | 2      | 11     | 0.146   | 261     | 29988   | 7.1  | U      | pyridoxine 5'-phosphate oxidase [Homo sapiens]                                                    |    |                                     |
| *               | HsHeLa_Control-MG_Ti_20  | 4.799  | 0.4432 | 2297.55 | 2298.56 | 10723.8 | 1    | 1296.5 | 50                                                                                                | 10 | K.ELDSNPFASLVFYWEPLNR.Q             |
| *               | Hs293FLP-MG_Ti_205.178   | 2.6978 | 0.1627 | 2343.83 | 2344.63 | 10466.7 | 2    | 715.7  | 44.4                                                                                              | 1  | R.KKNEELEQLYQDQEVPPK.S              |
| gi 4758516 ref  |                          | 2      | 3      | 0.146   | 240     | 26788   | 4.7  | U      | hepatoma-derived growth factor (high-mobility group protein 1-like) [Homo sapiens]                |    |                                     |
| *               | HsGST-MOCK_Ti_302.280    | 3.0104 | 0.2846 | 1819.91 | 1821    | 6013.4  | 4    | 487.2  | 50                                                                                                | 1  | K.GFSEGLWEIENNPTVK.A                |
| *               | HsHeLa3_Ti_102.1462.146  | 4.6839 | 0.362  | 2046.65 | 2046.03 | 4126.3  | 1    | 724.5  | 61.1                                                                                              | 2  | K.SCVVEPEPEPEAAEGDGDK.K             |
| gi 28875797 ref |                          | 2      | 3      | 0.145   | 248     | 26397   | 12.2 | U      | hypothetical protein LOC26097 [Homo sapiens]                                                      |    |                                     |
| *               | HsF-IP-293-MG_Ti_105.14  | 2.8631 | 0.1702 | 1784.86 | 1785.07 | 10069.8 | 2    | 1051   | 56.7                                                                                              | 1  | R.LAQQMENRPSVQAALK.L                |
| *               | HsF-IP-293-MG_Ti_104.23  | 3.3363 | 0.4054 | 2206.18 | 2207.29 | 7506.1  | 1    | 648.9  | 47.4                                                                                              | 2  | K.GHLDAELDAYMAQTDPETND.-            |
| gi 4885539 ref  |                          | 2      | 8      | 0.145   | 227     | 24636   | 7.2  | U      | protein-L-isoaspartate (D-aspartate) O-methyltransferase [Homo sapiens]                           |    |                                     |
| *               | HsGST-MOCK_Ti_104.137    | 4.4803 | 0.3922 | 1478.62 | 1478.61 | 7635.5  | 1    | 1227.9 | 65.4                                                                                              | 5  | K.SGGASHSELIHNL.R                   |
| *               | HsFLAG-Control_293_Ti_2( | 5.0888 | 0.4555 | 2046.5  | 2044.37 | 4389.3  | 1    | 676.6  | 63.9                                                                                              | 3  | R.LILPVGPAAGGNQMLEQYDK.L            |
| gi 4885417 ref  |                          | 2      | 2      | 0.145   | 200     | 22407   | 5.4  | U      | huntingtin interacting protein 2 [Homo sapiens]                                                   |    |                                     |
| *               | HsFLAG-Control_HeLa_S1(  | 2.9271 | 0.1828 | 1305.66 | 1303.5  | 7177.9  | 2    | 690.8  | 60                                                                                                | 1  | K.IPETYPFNPPK.V                     |
| *               | HsFLAG-Control_HeLa_S1(  | 3.1526 | 0.1694 | 1978.53 | 1977.23 | 7536.1  | 2    | 589.8  | 44.1                                                                                              | 1  | R.LWAHVYAGAPVSSPEYTK.K              |
| gi 16117791 ref |                          | 2      | 3      | 0.145   | 110     | 12538   | 11.1 | U      | ribosomal protein L35a [Homo sapiens]                                                             |    |                                     |
|                 | Hs293FLP_TREX_Ti_103.1   | 1.9829 | 0.1465 | 769.42  | 769.919 | 6471.7  | 3    | 518.2  | 75                                                                                                | 1  | K.AIFAGYK.R                         |
| *               | Hs293FLP_TREX_Ti_102.1   | 2.6843 | 0.2877 | 1101.34 | 1102.19 | 7157.3  | 5    | 559.8  | 68.8                                                                                              | 2  | R.DETEFYLGK.R                       |
| gi 40288290 ref |                          | 2      | 3      | 0.144   | 236     | 26648   | 6.4  | U      | chloride intracellular channel 3 [Homo sapiens]                                                   |    |                                     |
| *               | HsFLAG-Control_HeLa_S1(  | 3.2412 | 0.3822 | 1952.22 | 1951.18 | 4970.5  | 1    | 628.8  | 58.8                                                                                              | 2  | K.DFAPGSQPLILLYDSDAK.T              |
| *               | HsFLAG-Control_HeLa_S1(  | 2.8223 | 0.1614 | 1856.57 | 1856.09 | 4733.5  | 5    | 284.7  | 46.7                                                                                              | 1  | K.NPVAQDEALYQQLLR.A                 |
| gi 12751497 ref |                          | 1      | 2      | 0.144   | 229     | 24992   | 10   | U      | hypothetical protein LOC65265 [Homo sapiens]                                                      |    |                                     |
| *               | HsGST-MOCK_Ti_304.021    | 6.7239 | 0.5489 | 3664.76 | 3664.11 | 9339.3  | 1    | 2504.2 | 35.2                                                                                              | 2  | K.LAPEEVPLSAEAQAQQLAQELAWCQEQLGLK.R |
| gi 29171734 ref |                          | 9      | 18     | 0.143   | 859     | 97208   | 9.2  | U      | eukaryotic translation initiation factor 2C, 2 [Homo sapiens]                                     |    |                                     |
| *               | HsFLAG-Control_293_Ti_2( | 2.6513 | 0.1823 | 1347.31 | 1346.63 | 5070.8  | 7    | 439.4  | 54.5                                                                                              | 1  | K.NLYTAMPLPIGR.D                    |
| *               | HsFLAG-Control_MG_293_   | 5.1938 | 0.5221 | 1744.04 | 1744.82 | 8988.3  | 1    | 1950.7 | 68.8                                                                                              | 1  | R.SFFTASEGCSNPLGGGR.E               |
| *               | Hs293FLP-MG_Ti_206.374   | 4.2695 | 0.4656 | 1794.45 | 1795.05 | 6315.1  | 1    | 1480.4 | 78.6                                                                                              | 2  | K.AQPVIEFVCEVLDK.S                  |
| *               | HsFLAG-Control_293_Ti_2( | 3.2352 | 0.2271 | 1660.36 | 1659.79 | 5558.7  | 2    | 491.7  | 53.8                                                                                              | 2  | K.SIEEQKPLTDSQR.V                   |
| *               | HsHeLa_Control-MG_Ti_20  | 6.0008 | 0.4766 | 3139.07 | 3139.42 | 9515.9  | 1    | 1847.7 | 35.6                                                                                              | 2  | R.RPASHQTFPLQESGQTVECTVAQYFK.D      |
| *               | Hs293FLP-MG_Ti_205.268   | 3.841  | 0.4209 | 1870.33 | 1871.11 | 5057.1  | 1    | 884.7  | 70                                                                                                | 4  | K.HTYLPLEVCNIVAGQR.C                |
| *               | HsFLAG-Control_Hela_Ti_1 | 2.84   | 0.3055 | 1299.77 | 1300.54 | 3510.1  | 7    | 379.6  | 63.6                                                                                              | 1  | R.VLQPPSILYGGR.N                    |
|                 | HsHeLa_Control-MG_Ti_10  | 2.2261 | 0.2133 | 1166.88 | 1167.31 | 5626.3  | 9    | 410    | 61.1                                                                                              | 1  | K.AVQVHQDTLR.T                      |
|                 | HsFLAG-Control_293_Ti_2( | 3.205  | 0.3047 | 1167.22 | 1167.31 | 5822.3  | 1    | 1125   | 88.9                                                                                              | 4  | K.AVQVHQDTLR.T                      |

|                   |                          |        |        |         |         |         |                                                          |
|-------------------|--------------------------|--------|--------|---------|---------|---------|----------------------------------------------------------|
| gi 61175215 ref N | 2                        | 4      | 0.143  | 231     | 26860   | 8.1 U   | hypothetical protein LOC139886 [Homo sapiens]            |
| *                 | Hs293FLP-MG_Ti_202.390   | 3.4757 | 0.3753 | 2868.26 | 2869.15 | 5751.7  | 1 479.5 38 2 R.IIPDSNYYFPTAEQEPGEVVDLSLVGK.Q             |
|                   | HsFLAG-Control_HeLa_NE   | 2.7657 | 0.1821 | 854.29  | 854.037 | 3938.9  | 1 651.2 91.7 2 K.PSVYFIK.F                               |
| gi 15082258 ref N | 2                        | 3      | 0.142  | 183     | 20811   | 5.3 U   | chromobox homolog 3 [Homo sapiens]                       |
| gi 89038889 ref N | 2                        | 3      | 0.142  | 183     | 20811   | 5.3 U   | PREDICTED: similar to chromobox homolog 3 [Homo sapiens] |
| gi 20544151 ref N | 2                        | 3      | 0.142  | 183     | 20811   | 5.3 U   | chromobox homolog 3 [Homo sapiens]                       |
|                   | HsFLAG-Control_HeLa_NE   | 5.2192 | 0.2967 | 1663.64 | 1662.83 | 5417.6  | 1 1120.8 76.9 1 K.KVEEAPEEPEFVVEK.V                      |
|                   | HsFlag1P_Ti_105.2805.280 | 4.1782 | 0.2869 | 1525.32 | 1525.71 | 8525    | 1 1987.3 86.4 2 K.CPQIVIAFYEER.L                         |
| gi 41872631 ref N | 19                       | 44     | 0.141  | 2511    | 273424  | 6.4 U   | fatty acid synthase [Homo sapiens]                       |
| *                 | HsFLAG-Control_HeLa_S1(  | 3.9759 | 0.3354 | 1917.94 | 1918.11 | 3853.7  | 1 514 59.4 3 K.EQGVTFPSGDIQEQLR.S                        |
| *                 | HsFLAG-Control_HeLa_S1(  | 3.2661 | 0.3135 | 2233.76 | 2234.51 | 6380.2  | 1 782.9 52.6 2 K.DVTISGPQAPVFEFVEQLR.K                   |
| *                 | HsFLAG-Control_HeLa_S1(  | 5.0648 | 0.4613 | 2475.51 | 2473.84 | 5467.5  | 1 667.5 47.7 3 R.LHLSGIDANPNALFPPVEFPAPR.G               |
| *                 | HsFLAG-Control_HeLa_S1(  | 3.0466 | 0.2352 | 1595.68 | 1594.94 | 5360.9  | 1 547.8 61.5 2 R.VLFPATGYLSIVWK.T                        |
| *                 | HsHeLa_Control-MG_Ti_20  | 3.6247 | 0.2555 | 2787.58 | 2787.32 | 5872.6  | 1 672 29 1 R.ALGLGVEQLPVVFEEDVVLHQATILPK.T               |
| *                 | HsFLAG-Control_HeLa_S1(  | 5.7836 | 0.4099 | 2840.99 | 2842.18 | 7220.6  | 1 1279.8 36.5 4 R.LFDHPESPTPNPTEPLFLAQAEVYK.E            |
| *                 | HsFLAG-Control_HeLa_S1(  | 4.1345 | 0.4722 | 1870.36 | 1870.95 | 5933.9  | 1 650.2 60.7 2 K.FCFTPHTEEGCLSER.A                       |
| *                 | HsFLAG-Control_HeLa_S1(  | 5.1333 | 0.4067 | 1779.12 | 1779.08 | 7692.6  | 1 2279.4 75 8 K.LPEDPLLSGLLDSPALK.A                      |
| *                 | HsFLAG-Control_HeLa_S1(  | 4.252  | 0.1904 | 3722.99 | 3722.11 | 9423.4  | 2 547.6 22 1 R.GHPLGDIVAFILTSTEPQYGGGILSQDAWESLFSR.V     |
| *                 | HsFLAG-Control_HeLa_S1(  | 3.7502 | 0.2764 | 1469.81 | 1470.58 | 5798.3  | 1 1119.2 75 3 R.FPQLDSTSFANSR.D                          |
| *                 | HsFLAG-Control_HeLa_S1(  | 4.0867 | 0.3734 | 1624.65 | 1623.93 | 7946.7  | 1 1600.1 71.4 3 K.VVVQVLAEEPEAVLK.G                      |
| *                 | HsFLAG-Control_HeLa_S1(  | 4.8209 | 0.4715 | 2363.02 | 2363.77 | 9824.7  | 1 1809.2 54.8 1 K.SYIAGGLGGFLELAQWLIQR.G                 |
| *                 | HsFLAG-Control_HeLa_S1(  | 4.6475 | 0.4147 | 2266.8  | 2265.7  | 5758.9  | 1 1184.3 54.5 2 R.GLIAEAAQLGPVGGVFNLAIVLR.D              |
| *                 | HsFLAG-Control_HeLa_S1(  | 2.787  | 0.1938 | 2266.76 | 2266.48 | 7218.9  | 2 522.3 44.4 1 R.DGLENQTPEFFQDVCKPK.Y                    |
| *                 | HsFLAG-Control_HeLa_S1(  | 3.4579 | 0.3357 | 1614.55 | 1614.76 | 9397.8  | 1 1452.5 69.2 1 K.EDGLAQQTQLNLR.S                        |
| *                 | HsFLAG-Control_MG_293_   | 2.6526 | 0.2103 | 1427.03 | 1427.7  | 6604.9  | 2 662.8 62.5 1 R.SLLVNPEGPTLMR.L                         |
| *                 | HsFLAG-Control_HeLa_S1(  | 5.0004 | 0.3548 | 2290.72 | 2291.36 | 7245.8  | 1 1004 50 4 K.TGGAYGEDLGADYNLSQVCDGK.V                   |
| *                 | HsFLAG-Control_HeLa_S1(  | 3.6224 | 0.2703 | 2424.06 | 2423.77 | 5212.3  | 1 619.9 33 1 R.TLLEGSGLSIIIIHSSSLAEPR.V                  |
| *                 | HsFLAG-Control_HeLa_S1(  | 3.0978 | 0.3679 | 2425.03 | 2423.77 | 8878.8  | 2 381.7 31.8 1 R.TLLEGSGLSIIIIHSSSLAEPR.V                |
| gi 4557365 ref NF | 12                       | 31     | 0.14   | 1417    | 159000  | 7.5 U   | Bloom syndrome protein [Homo sapiens]                    |
| *                 | HsFLAG-Control_293_Ti_1( | 3.4312 | 0.2516 | 1621.88 | 1622.73 | 6823.7  | 1 768.2 60 2 K.TSSDNNVSVTNVSVAK.T                        |
| *                 | HsFLAG-Control_293_Ti_1( | 3.5998 | 0.3881 | 2539    | 2539.67 | 7856.7  | 1 785.8 45.2 1 K.DVNVTEDFSSEPLPNTTNQQR.V                 |
| *                 | HsFLAG-Control_293_Ti_1( | 3.4232 | 0.2501 | 1258.75 | 1259.49 | 3579    | 1 652.7 80 1 K.SLLPDFLQTPK.E                             |
| *                 | HsFLAG-Control_293_Ti_1( | 4.2226 | 0.2872 | 1477.23 | 1477.62 | 9169.8  | 1 1604.6 75 2 K.EVVCCTQNTPTVK.K                          |
| *                 | HsFLAG-Control_293_Ti_1( | 2.191  | 0.1088 | 1477.26 | 1477.62 | 5285.1  | 1 311.1 54.2 1 K.EVVCCTQNTPTVK.K                         |
| *                 | HsFLAG-Control_293_Ti_1( | 2.549  | 0.1985 | 1402    | 1402.6  | 4577.5  | 1 594.3 72.7 1 K.SFVTPPQSHFVR.V                          |
| *                 | HsFLAG-Control_293_Ti_1( | 3.6357 | 0.3015 | 2833.42 | 2833.99 | 7453.4  | 1 584.2 37.5 3 K.TDCLPVSSAQNINFSESIQNYTDK.S              |
| *                 | HsFLAG-Control_293_Ti_1( | 5.2454 | 0.4739 | 2416.9  | 2417.78 | 4538.2  | 1 730.1 52.4 7 K.SLCYQLPACVSPGVTVVISPLR.S                |
| *                 | HsFLAG-Control_293_Ti_1( | 3.0349 | 0.2215 | 1608.9  | 1608.83 | 3673    | 2 407.2 57.1 3 K.LTSLDIPATYLTGDK.T                       |
| *                 | HsFLAG-Control_293_Ti_1( | 4.9885 | 0.4808 | 2133.49 | 2134.36 | 9153.5  | 1 1664.9 64.7 4 R.IQLLAYFGENGFNPDFCK.K                   |
| *                 | HsFLAG-Control_293_Ti_1( | 4.6005 | 0.3569 | 2243.07 | 2244.33 | 6548.4  | 1 600.9 47.5 2 K.YSEWTSAPEDSSPGISLSSSR.G                 |
| *                 | HsFLAG-Control_293_Ti_1( | 4.7308 | 0.4882 | 2152.79 | 2153.22 | 12403.2 | 1 1458.4 47.7 4 K.SSSIIGSSASHTSQATSGANSK.L               |
| gi 4506587 ref NF | 3                        | 8      | 0.14   | 121     | 13569   | 5.1 U   | replication protein A3, 14kDa [Homo sapiens]             |
| *                 | HsHeLa_Control-MG_Ti_10  | 4.1689 | 0.3134 | 2040.13 | 2040.33 | 5688.7  | 1 979.9 65.6 4 K.IIHDFPQFYPLGIVQHD.-                     |
| *                 | Hs293FLP_Ti_305.2973.29  | 4.6431 | 0.3836 | 2041.23 | 2040.33 | 4942.2  | 1 1228.9 71.9 2 K.IIHDFPQFYPLGIVQHD.-                    |
| *                 | HsHeLa_Control-MG_Ti_10  | 4.4009 | 0.2433 | 2042.71 | 2040.33 | 4570.3  | 8 660.6 39.1 2 K.IIHDFPQFYPLGIVQHD.-                     |
| gi 5454064 ref NF | 6                        | 11     | 0.139  | 669     | 69492   | 9.7 U   | RNA binding motif protein 14 [Homo sapiens]              |
| *                 | HsFLAG-MOCK_300mM_T      | 2.7891 | 0.235  | 1556.81 | 1556.77 | 8606.3  | 2 691.9 57.7 1 R.AIEALHGHELPRGR.A                        |
| *                 | HsFlag1P_Ti_103.2238.223 | 5.8463 | 0.4734 | 1751.64 | 1752.93 | 6347.2  | 1 2334.2 86.7 3 K.IFVGNVSAACTSQELR.S                     |
| *                 | HsFlag1P_Ti_106.2176.217 | 3.9106 | 0.3764 | 1157.16 | 1157.31 | 6024.2  | 1 1210.2 81.8 2 K.KGPGLAQSGDK.T                          |

|                   |                          |        |        |         |         |         |   |        |      |   |                                                                                                    |
|-------------------|--------------------------|--------|--------|---------|---------|---------|---|--------|------|---|----------------------------------------------------------------------------------------------------|
| *                 | HsFlag1P_Ti_104.2101.210 | 3.7344 | 0.2227 | 1609.38 | 1609.82 | 5002.9  | 1 | 851.5  | 67.9 | 2 | R.ASYVAPLTAQPATYR.A                                                                                |
| *                 | HsFlag1P_Ti_105.1908.190 | 2.57   | 0.204  | 1219.61 | 1220.37 | 4634.8  | 1 | 772.9  | 81.8 | 2 | R.AQPSVSLGAAYR.A                                                                                   |
| *                 | HsHeLa3_Ti_105.1607.160  | 3.6831 | 0.3266 | 2468.46 | 2466.63 | 8167.5  | 1 | 500.7  | 34.8 | 1 | R.TQSSASLAASYAAQQHPQAAASYR.G                                                                       |
| gi 23510338 ref N |                          | 8      | 20     | 0.138   | 1058    | 117849  |   |        |      |   | ubiquitin-activating enzyme E1 [Homo sapiens]                                                      |
| gi 23510340 ref N |                          | 8      | 20     | 0.138   | 1058    | 117849  |   |        |      |   | ubiquitin-activating enzyme E1 [Homo sapiens]                                                      |
|                   | HsFLAG-Control_HeLa_S1(  | 3.6321 | 0.218  | 1909.54 | 1910.17 | 4656    | 1 | 535.1  | 52.9 | 2 | K.SLVASLAEPDFVVTDFAK.F                                                                             |
|                   | HsFLAG-Control_HeLa_S1(  | 3.4288 | 0.341  | 1809.44 | 1810.02 | 6010.5  | 1 | 640.7  | 60   | 2 | R.ALPAVQQNNLDEDLIR.K                                                                               |
|                   | HsFLAG-Control_HeLa_S1(  | 4.9245 | 0.3166 | 2602.68 | 2601.75 | 7958.6  | 1 | 1653   | 56.8 | 8 | R.IYDDDFQNLGDGVANALDNVDAR.M                                                                        |
|                   | Hs293FLP_TREX_Ti_105.1   | 3.106  | 0.1331 | 1244.57 | 1244.47 | 5933.5  | 1 | 951.3  | 77.3 | 1 | R.KPLLESGLTGTK.G                                                                                   |
|                   | HsFLAG-Control_HeLa_S1(  | 3.821  | 0.2784 | 2522.32 | 2522.77 | 4986.8  | 2 | 374.4  | 40.9 | 2 | K.GNVQVVIPFLTESYSSSQDPPEK.S                                                                        |
|                   | HsFLAG-Control_HeLa_S1(  | 3.6143 | 0.4124 | 1624.67 | 1624.88 | 4112.2  | 1 | 708.9  | 67.9 | 2 | R.LAGTQPLEVLEAVQR.S                                                                                |
|                   | HsFLAG-Control_HeLa_S1(  | 3.8377 | 0.3054 | 1933.83 | 1934.24 | 6524.2  | 1 | 809.5  | 52.9 | 1 | R.AAVATFLQSVQVPEFTP.K.S                                                                            |
|                   | HsFLAG-Control_HeLa_S1(  | 3.2224 | 0.1622 | 2279.6  | 2279.65 | 5067.5  | 1 | 630.9  | 47.5 | 2 | K.NGFLNLALPFFGFSEPLAAPR.H                                                                          |
| gi 89052386 ref X |                          | 6      | 9      | 0.138   | 835     | 89356   |   |        |      |   | PREDICTED: widely-interspaced zinc finger motifs isoform 1 [Homo sapiens]                          |
| gi 89057269 ref X |                          | 6      | 9      | 0.138   | 835     | 89356   |   |        |      |   | PREDICTED: similar to widely-interspaced zinc finger motifs isoform 1 isoform 10 [Homo sapiens]    |
|                   | HsFLAG-Control_293_Ti_2( | 2.5955 | 0.1903 | 2320.77 | 2319.61 | 7485    | 1 | 379.5  | 35.7 | 1 | R.QLGVAESESSESGAPIDLLYELVK.Q                                                                       |
|                   | Hs293FLP_Ti_304.1637.16  | 2.9303 | 0.274  | 1266.28 | 1265.45 | 8302.1  | 1 | 947.3  | 68.2 | 1 | R.SPSDLHISPLAK.K                                                                                   |
|                   | HsHeLa_Control-MG_Ti_10  | 2.6106 | 0.2123 | 2334.64 | 2333.69 | 5539.5  | 2 | 227.4  | 28.3 | 1 | R.ELSLTPITGAKPSATGYLGSVAAK.R                                                                       |
|                   | Hs293FLP-MG_Ti_104.139   | 2.8918 | 0.3133 | 1696.01 | 1694.89 | 5191.5  | 1 | 711.2  | 55.9 | 3 | R.AADGGERPLAASPPGTVK.A                                                                             |
|                   | Hs293FLP-MG_Ti_203.369   | 3.5831 | 0.3743 | 2253.19 | 2254.47 | 9187.5  | 1 | 787.6  | 50   | 2 | R.FCEVEFGPLSIQEEWVR.H                                                                              |
|                   | Hs293FLP-MG_Ti_202.001   | 2.7659 | 0.3465 | 2078.28 | 2077.17 | 5847.9  | 1 | 420.5  | 42.5 | 1 | K.ADPPPEESQAPQAQTAEEAP.-                                                                           |
| gi 27545326 ref N |                          | 4      | 5      | 0.138   | 385     | 44141   |   |        |      |   | SWI/SNF related, matrix associated, actin dependent regulator of chromatin, subfamily b,           |
| gi 55956801 ref N |                          | 4      | 5      | 0.141   | 376     | 43158   |   |        |      |   | SWI/SNF related, matrix associated, actin dependent regulator of chromatin, subfamily b,           |
|                   | HsHeLa3_Ti_102.2147.214  | 2.5162 | 0.329  | 1548.83 | 1548.6  | 4062.2  | 1 | 376.5  | 61.5 | 1 | K.ASEVEEILDGNDEK.Y                                                                                 |
|                   | HsHeLa3_Ti_102.2149.214  | 2.6418 | 0.1146 | 1548.96 | 1548.6  | 7845    | 1 | 790.7  | 61.5 | 2 | K.ASEVEEILDGNDEK.Y                                                                                 |
|                   | HsHeLa3_Ti_103.3136.313  | 2.716  | 0.264  | 1921.94 | 1922.19 | 4260.6  | 1 | 377    | 50   | 1 | K.TYAFSENPLPTVEIAIR.N                                                                              |
|                   | HsHeLa3_Ti_102.4011.401  | 4.1184 | 0.3985 | 2539.73 | 2538.71 | 6253.4  | 1 | 654.2  | 45.2 | 1 | R.NTGADADQWCPLLETTLDAEMEK.K                                                                        |
| gi 4504483 ref NF |                          | 1      | 2      | 0.138   | 218     | 24579   |   |        |      |   | hypoxanthine phosphoribosyltransferase 1 [Homo sapiens]                                            |
| *                 | HsHeLa_Control-MG_Ti_20  | 4.943  | 0.3938 | 3436.62 | 3437.66 | 8052.3  | 1 | 792.1  | 26.7 | 2 | R.SPGVVISDDEPGYDLDFCIPNHYAEDLER.V                                                                  |
| gi 4506629 ref NF |                          | 4      | 10     | 0.138   | 159     | 17752   |   |        |      |   | ribosomal protein L29 [Homo sapiens]                                                               |
|                   | Hs293FLP_TREX_Ti_103.1   | 1.9567 | 0.2825 | 1377.42 | 1378.57 | 6296.3  | 1 | 579.3  | 53.6 | 1 | K.AQAAAPASVPAQAPK.R                                                                                |
|                   | HsFLAG-Control_293_Ti_2( | 4.4356 | 0.2747 | 1378.28 | 1378.57 | 3866.2  | 1 | 819.9  | 75   | 3 | K.AQAAAPASVPAQAPK.R                                                                                |
|                   | HsFLAG-MOCK_300mM_T      | 4.3009 | 0.3319 | 1378.49 | 1378.57 | 3446.4  | 4 | 647    | 67.9 | 4 | K.AQAAAPASVPAQAPK.R                                                                                |
| *                 | Hs293FLP_TREX_Ti_106.2   | 4.2122 | 0.4162 | 2161.61 | 2161.47 | 4704.1  | 1 | 559.4  | 50   | 2 | K.AQAAAPASVPAQAPKRTQAPTK.A                                                                         |
| gi 4506725 ref NF |                          | 3      | 7      | 0.137   | 263     | 29598   |   |        |      |   | ribosomal protein S4, X-linked X isoform [Homo sapiens]                                            |
| *                 | HsHeLa_Control-MG_Ti_10  | 4.0837 | 0.3446 | 1545.72 | 1543.9  | 6480.9  | 1 | 1123   | 77.3 | 4 | K.LRECLPLIIFLR.N                                                                                   |
|                   | HsHeLa_Control-MG_Ti_20  | 2.6756 | 0.1698 | 1216.29 | 1216.39 | 3828.2  | 1 | 582.9  | 70   | 1 | K.GIPHLVTHDAR.T                                                                                    |
|                   | HsGST-MOCK_Ti_105.142    | 3.3503 | 0.302  | 1507.79 | 1507.69 | 7678.8  | 1 | 887.3  | 66.7 | 2 | R.ERHPGSFVHVHK.D                                                                                   |
| gi 8393116 ref NF |                          | 1      | 2      | 0.137   | 131     | 14711   |   |        |      |   | chromatin accessibility complex 1 [Homo sapiens]                                                   |
| *                 | HsFLAG-Control_HeLa_NE   | 3.8116 | 0.383  | 1873.43 | 1874.1  | 7814    | 2 | 578.5  | 47.1 | 2 | K.SSPEVSSINQEALVLTAK.A                                                                             |
| gi 21536286 ref N |                          | 3      | 7      | 0.136   | 381     | 42644   |   |        |      |   | brain creatine kinase [Homo sapiens]                                                               |
| *                 | HsF-IP-293_Ti_202.0094.0 | 5.0972 | 0.4049 | 2520.34 | 2519.64 | 6448.9  | 1 | 1020   | 54.5 | 2 | K.TDLNPDNLQGGDDLDPNYVLSSR.V                                                                        |
| *                 | HsFLAG-Control_293_Ti_2( | 4.8649 | 0.484  | 1589.36 | 1587.77 | 11237.2 | 1 | 2354.5 | 73.3 | 3 | K.LAVEALSSLDGDLAGR.Y                                                                               |
|                   | Hs293FLP_TREX_Ti_106.2   | 3.6989 | 0.3438 | 1312.34 | 1312.61 | 6390.9  | 1 | 1267.6 | 79.2 | 2 | K.PVSPLLLASGMAR.D                                                                                  |
| gi 88951236 ref X |                          | 17     | 51     | 0.136   | 198     | 21115   |   |        |      |   | PREDICTED: similar to eukaryotic translation elongation factor 1 alpha 2 isoform 30 [Homo sapiens] |
|                   | HsGST-MOCK_Ti_405.245    | 2.884  | 0.275  | 1314.28 | 1315.56 | 3797.5  | 1 | 422.1  | 63.6 | 2 | R.EHALLAYTLGVK.Q                                                                                   |
|                   | Hs293FLP-MG_Ti_204.231   | 3.1474 | 0.3715 | 1314.52 | 1315.56 | 6113    | 1 | 627.9  | 63.6 | 1 | R.EHALLAYTLGVK.Q                                                                                   |
|                   | HsFLAG-Control_HeLa_NE   | 3.8894 | 0.3764 | 1314.54 | 1315.56 | 7099.1  | 1 | 843.2  | 68.2 | 1 | R.EHALLAYTLGVK.Q                                                                                   |
|                   | HsFLAG-Control_HeLa_S1(  | 3.3633 | 0.3249 | 1314.54 | 1315.56 | 6442.6  | 1 | 682.8  | 63.6 | 1 | R.EHALLAYTLGVK.Q                                                                                   |



|                   |                          |        |        |         |         |        |      |        |      |    |                                                                        |
|-------------------|--------------------------|--------|--------|---------|---------|--------|------|--------|------|----|------------------------------------------------------------------------|
|                   | HsHeLa3_Ti_105.2226.222  | 3.7276 | 0.3842 | 1314.65 | 1315.56 | 5432.8 | 1    | 771    | 68.2 | 6  | R.EHALLAYTLGVK.Q                                                       |
|                   | HsGST-MOCK_Ti_405.244    | 3.0462 | 0.2235 | 1314.83 | 1315.56 | 6532.9 | 2    | 861.4  | 72.7 | 2  | R.EHALLAYTLGVK.Q                                                       |
|                   | HsHeLa_Control-MG_Ti_10  | 3.4703 | 0.3478 | 1314.83 | 1315.56 | 5679.7 | 1    | 655    | 63.6 | 2  | R.EHALLAYTLGVK.Q                                                       |
|                   | HsFLAG-Control_HeLa_S1(  | 4.0957 | 0.3505 | 1315.1  | 1315.56 | 6796.4 | 1    | 1542.9 | 86.4 | 7  | R.EHALLAYTLGVK.Q                                                       |
|                   | HsFLAG-Control_HeLa_S1(  | 3.3605 | 0.3219 | 1315.28 | 1315.56 | 7637   | 1    | 1057.6 | 72.7 | 3  | R.EHALLAYTLGVK.Q                                                       |
|                   | HsGST-MOCK_Ti_305.236    | 3.3426 | 0.261  | 1315.47 | 1315.56 | 3468.6 | 1    | 431.4  | 68.2 | 3  | R.EHALLAYTLGVK.Q                                                       |
|                   | HsGST-MOCK_Ti_305.236    | 3.4506 | 0.2703 | 1315.48 | 1315.56 | 5538.1 | 1    | 959.1  | 81.8 | 7  | R.EHALLAYTLGVK.Q                                                       |
|                   | HsFLAG-Control_HeLa_NE   | 3.1986 | 0.3053 | 1315.53 | 1315.56 | 6457.5 | 2    | 1086.8 | 77.3 | 2  | R.EHALLAYTLGVK.Q                                                       |
|                   | HsFLAG-Control_HeLa_S1(  | 3.6587 | 0.3109 | 1315.58 | 1315.56 | 6360.4 | 2    | 555.9  | 59.1 | 3  | R.EHALLAYTLGVK.Q                                                       |
|                   | HsHeLa3_Ti_105.2218.221  | 3.3286 | 0.2525 | 1316.68 | 1315.56 | 6114.4 | 2    | 1130.5 | 81.8 | 2  | R.EHALLAYTLGVK.Q                                                       |
|                   | HsHeLa_Control-MG_Ti_10  | 3.3203 | 0.2631 | 1316.86 | 1315.56 | 6340.9 | 1    | 1163.7 | 81.8 | 6  | R.EHALLAYTLGVK.Q                                                       |
|                   | HsGST-MOCK_Ti_102.183    | 2.8304 | 0.2663 | 1317.2  | 1315.56 | 6447.2 | 1    | 1041.9 | 77.3 | 1  | R.EHALLAYTLGVK.Q                                                       |
|                   | HsHeLa3_Ti_103.2430.243  | 3.7938 | 0.4396 | 1755.9  | 1755.95 | 7187.6 | 1    | 1037.6 | 57.1 | 2  | K.PMCVESFSDDYPLGR.F                                                    |
| gi 20070130 ref N |                          | 1      | 2      | 0.136   | 162     | 17699  | 7.5  | U      |      |    | basic transcription factor 3 [Homo sapiens]                            |
| *                 | HsFLAG-Control_HeLa_S1(  | 4.0459 | 0.3553 | 2400.74 | 2401.78 | 9186.9 | 1    | 1273   | 50   | 2  | K.QLTEMLPSILNQLGADSLTSLR.R                                             |
| gi 29837655 ref N |                          | 3      | 3      | 0.135   | 421     | 46089  | 10   | U      |      |    | DNA polymerase delta interacting protein 3 isoform 1 [Homo sapiens]    |
| gi 30089919 ref N |                          | 3      | 3      | 0.145   | 392     | 42895  | 9.9  | U      |      |    | DNA polymerase delta interacting protein 3 isoform 2 [Homo sapiens]    |
|                   | HsGST-MOCK_Ti_403.232    | 3.177  | 0.3722 | 1802.89 | 1803.03 | 6929.4 | 1    | 890.9  | 56.2 | 1  | K.VVQNDAYTAPALPSSIR.T                                                  |
|                   | Hs293FLP-MG_Ti_202.300   | 2.5446 | 0.1748 | 2197.28 | 2196.5  | 5038.9 | 1    | 349.6  | 47.2 | 1  | K.CNLHMNGNVITSDQPILLR.L                                                |
|                   | HsFLAG-MOCK_300mM_T      | 2.7434 | 0.2133 | 2198.2  | 2198.4  | 3343.7 | 5    | 333.3  | 45   | 1  | R.RVNSASSSNPPAEVDPDITLK.A                                              |
| gi 28557745 ref N |                          | 3      | 5      | 0.135   | 377     | 40140  | 8.2  | U      |      |    | zinc binding alcohol dehydrogenase, domain containing 2 [Homo sapiens] |
| *                 | HsHeLa_Control-MG_Ti_10  | 4.2671 | 0.444  | 1818.68 | 1819.09 | 4020.8 | 1    | 1065.1 | 76.7 | 1  | R.HFLDFQGSaipQAMQK.L                                                   |
| *                 | HsHeLa_Control-MG_Ti_20  | 5.03   | 0.4762 | 2091.77 | 2091.5  | 8974.8 | 1    | 1402.9 | 52.6 | 3  | R.LIVIGFISGYQTPGLSPVK.A                                                |
| *                 | HsHeLa_Control-MG_Ti_20  | 2.8554 | 0.3014 | 1698.41 | 1698.92 | 8255.2 | 1    | 619.6  | 50   | 1  | K.SASVQGFFLNHLYSK.Y                                                    |
| gi 13786127 ref N |                          | 2      | 4      | 0.135   | 356     | 37980  | 5.2  | U      |      |    | Cdc42 effector protein 4 [Homo sapiens]                                |
| *                 | HsHeLa3_Ti_102.1325.132  | 4.2923 | 0.4059 | 1907.81 | 1907.9  | 6700.9 | 1    | 976.3  | 58.3 | 2  | K.AGEPDGESLDEQPSSSSSK.R                                                |
| *                 | HsHeLa3_Ti_105.2679.268  | 4.6388 | 0.4139 | 2829.73 | 2829.06 | 8656   | 1    | 1105.7 | 41.1 | 2  | K.AGPDLPSPSHALEDEGWAAAAPSPGSAR.S                                       |
| gi 47419914 ref N |                          | 6      | 20     | 0.134   | 471     | 53165  | 6.2  | U      |      |    | tryptophanyl-tRNA synthetase isoform a [Homo sapiens]                  |
| gi 47419920 ref N |                          | 6      | 20     | 0.147   | 430     | 48852  | 6.5  | U      |      |    | tryptophanyl-tRNA synthetase isoform b [Homo sapiens]                  |
| gi 47419918 ref N |                          | 6      | 20     | 0.147   | 430     | 48852  | 6.5  | U      |      |    | tryptophanyl-tRNA synthetase isoform b [Homo sapiens]                  |
| gi 47419916 ref N |                          | 6      | 20     | 0.134   | 471     | 53165  | 6.2  | U      |      |    | tryptophanyl-tRNA synthetase isoform a [Homo sapiens]                  |
|                   | HsHeLa_Control-MG_Ti_20  | 1.8835 | 0.1233 | 972.55  | 973.12  | 2744.4 | 6    | 224.7  | 64.3 | 1  | K.HVTFNQVK.G                                                           |
|                   | HsHeLa_Control-MG_Ti_20  | 4.6264 | 0.3732 | 2325.75 | 2326.66 | 9456.8 | 1    | 2258.9 | 42.5 | 1  | K.ISFPAIQAAPSFNSFPQIFR.D                                               |
|                   | HsHeLa_Control-MG_Ti_10  | 3.6343 | 0.3525 | 2326.26 | 2326.66 | 3872.9 | 1    | 557.9  | 57.5 | 10 | K.ISFPAIQAAPSFNSFPQIFR.D                                               |
|                   | Hs293FLP_Ti_305.3621.36  | 3.4553 | 0.3551 | 2327.3  | 2326.66 | 4076.9 | 1    | 494.7  | 47.5 | 4  | K.ISFPAIQAAPSFNSFPQIFR.D                                               |
|                   | HsHeLa_Control-MG_Ti_20  | 4.2308 | 0.3991 | 1929.61 | 1928.24 | 7956.3 | 1    | 955.4  | 52.9 | 1  | K.PALLHSTFFPALQGAQTK.M                                                 |
|                   | HsHeLa_Control-MG_Ti_20  | 4.6042 | 0.303  | 1801.61 | 1802.13 | 4684.2 | 1    | 1171.3 | 73.3 | 3  | K.ALIEVLQPLIAEHQAR.R                                                   |
| gi 4503841 ref NF |                          | 5      | 9      | 0.133   | 609     | 69843  | 6.6  | U      |      |    | ATP-dependent DNA helicase II, 70 kDa subunit [Homo sapiens]           |
| *                 | HsFLAG-Control_HeLa_NE   | 4.0986 | 0.2902 | 2502.49 | 2502.43 | 8861.1 | 1    | 850    | 45.2 | 3  | K.TEGDEEAEEEEQENLEASGDYK.Y                                             |
| *                 | HsHeLa3_Ti_103.2486.248  | 4.2198 | 0.2374 | 1574.61 | 1574.77 | 7406.6 | 1    | 1792.5 | 73.1 | 1  | K.NIYVLQELDNPGAK.R                                                     |
|                   | HsHeLa3_Ti_106.2591.259  | 2.527  | 0.1915 | 1401.9  | 1400.62 | 7822.8 | 1    | 687.5  | 63.6 | 1  | K.KPGGFDISLFYR.D                                                       |
|                   | HsFLAG-Control_HeLa_S1(  | 3.8349 | 0.3195 | 2133.35 | 2133.5  | 8492.6 | 1    | 1096.8 | 55.6 | 3  | K.IQVTPPGFQLVFLPFADDK.R                                                |
|                   | Hs293FLP_TREX_Ti_105.1   | 3.0738 | 0.2778 | 1705.15 | 1704.84 | 6138.4 | 1    | 602.1  | 53.8 | 1  | R.SDSFENPVLQQHFR.N                                                     |
| gi 42476281 ref N |                          | 2      | 3      | 0.133   | 294     | 31566  | 7.6  | U      |      |    | voltage-dependent anion channel 2 [Homo sapiens]                       |
| gi 88955151 ref X |                          | 2      | 3      | 0.133   | 293     | 31445  | 7.6  | U      |      |    | PREDICTED: similar to voltage-dependent anion channel 2 [Homo sapiens] |
| gi 88953242 ref X |                          | 2      | 3      | 0.133   | 293     | 31479  | 7.6  | U      |      |    | PREDICTED: similar to voltage-dependent anion channel 2 [Homo sapiens] |
|                   | HsFLAG-Control_293_Ti_1( | 4.1304 | 0.4826 | 1908.18 | 1908.89 | 6745.2 | 1    | 1146.6 | 61.1 | 2  | K.SCSGVFSTSGSSNTDTGK.V                                                 |
|                   | HsFLAG-Control_293_Ti_1( | 3.2732 | 0.2801 | 2103.43 | 2104.41 | 6589.5 | 1    | 607.9  | 44.7 | 1  | K.VNNSLIGVGYTQLRPGVK.L                                                 |
| gi 4506609 ref NF |                          | 2      | 5      | 0.133   | 196     | 23466  | 11.5 | U      |      |    | ribosomal protein L19 [Homo sapiens]                                   |

|                    |                          |        |        |         |         |        |   |        |      |    |                                                      |
|--------------------|--------------------------|--------|--------|---------|---------|--------|---|--------|------|----|------------------------------------------------------|
| *                  | Hs293FLP-MG_Ti_102.231:  | 4.389  | 0.2864 | 1946.72 | 1944.07 | 5201.6 | 1 | 1189.1 | 71.9 | 4  | K.VWLDPNETNEIANANSR.Q                                |
|                    | Hs293FLP_Ti_302.1160.11: | 3.1971 | 0.1637 | 987.53  | 987.101 | 2794.1 | 2 | 729.7  | 93.8 | 1  | K.LLADQAEAR.R                                        |
| gi 4504715 ref NF  |                          | 6      | 9      | 0.132   | 644     | 70783  |   |        |      |    | poly A binding protein, cytoplasmic 4 [Homo sapiens] |
|                    | Hs283FLP_Ti_102.2047.20: | 5.1031 | 0.4609 | 1929.1  | 1930.08 | 6525.8 | 1 | 1508.8 | 68.8 | 4  | R.SLGYAYVNFQQPADAER.A                                |
|                    | HsFLAG-Control_MG_293_   | 2.7317 | 0.2852 | 1267.36 | 1267.48 | 6619.4 | 2 | 691.1  | 70   | 1  | R.ALDTMNFVVIK.G                                      |
|                    | HsFlag1P_Ti_105.3641.364 | 3.1412 | 0.1714 | 1808.78 | 1808.01 | 8318   | 1 | 898.9  | 56.7 | 1  | K.ALYDTFFSAFGNILSCK.V                                |
| *                  | HsFlag1P_Ti_106.3058.305 | 3.5219 | 0.3437 | 2318.34 | 2319.49 | 8611.8 | 1 | 726.9  | 44.7 | 1  | K.NFGEEVDDESCLKELFSQFGK.T                            |
| *                  | Hs293FLP_TREX_Ti_102.2   | 2.7094 | 0.2559 | 1272.38 | 1271.41 | 8330.3 | 4 | 631.4  | 54.5 | 1  | K.EFSPFGSITSAK.V                                     |
|                    | Hs283FLP_Ti_104.1603.16: | 3.028  | 0.1035 | 1031.54 | 1031.24 | 4323   | 1 | 1394.3 | 93.8 | 1  | K.PLYVALAQR.K                                        |
| gi 8923557 ref NF  |                          | 3      | 5      | 0.132   | 228     | 26749  |   |        |      |    | chromosome 20 open reading frame 11 [Homo sapiens]   |
| *                  | HsHeLa_Control-MG_Ti_20  | 3.1981 | 0.1253 | 994.15  | 994.142 | 6134.3 | 2 | 1001.2 | 92.9 | 1  | K.LNNLHVQR.A                                         |
| *                  | HsHeLa_Control-MG_Ti_20  | 4.474  | 0.4016 | 2445.67 | 2446.77 | 7077.3 | 1 | 685.2  | 45.2 | 2  | K.GQIQEAIALINSLHPELLDTNR.Y                           |
| *                  | HsHeLa_Control-MG_Ti_20  | 4.7467 | 0.2319 | 2448.45 | 2446.77 | 8805   | 3 | 1015.4 | 32.1 | 2  | K.GQIQEAIALINSLHPELLDTNR.Y                           |
| gi 38027914 ref NF |                          | 1      | 2      | 0.131   | 160     | 17909  |   |        |      |    | COP9 signalosome subunit 8 isoform 2 [Homo sapiens]  |
| gi 5729779 ref NF  |                          | 1      | 2      | 0.1     | 209     | 23226  |   |        |      |    | COP9 signalosome subunit 8 isoform 1 [Homo sapiens]  |
|                    | HsFLAG-Control_HeLa_S1(  | 3.2632 | 0.2383 | 2314.11 | 2314.69 | 5857.8 | 9 | 348.6  | 37.5 | 2  | K.FIPLSEPAPVPPIPNEQLAR.L                             |
| gi 19923466 ref NF |                          | 27     | 108    | 0.13    | 2752    | 299676 |   |        |      |    | splicing coactivator subunit SRm300 [Homo sapiens]   |
| *                  | HsHeLa_Control-MG_Ti_10  | 3.7296 | 0.2251 | 1734.95 | 1734.87 | 6728.7 | 1 | 1043.6 | 76.9 | 1  | R.RGERPDYKGEELR.R                                    |
| *                  | HsFLAG-Control_HeLa_NE   | 4.1622 | 0.4481 | 2019.49 | 2020.12 | 7757.3 | 1 | 1717.5 | 63.9 | 3  | R.AAFGISDSYVDGSSFDQPQR.R                             |
| *                  | HsFLAG-Control_HeLa_NE   | 3.9907 | 0.4222 | 1720.01 | 1720.92 | 4695.7 | 1 | 651.2  | 62.5 | 12 | R.SSTGPEPPAPTPLLAER.H                                |
| *                  | HsHeLa_Control-MG_Ti_20  | 6.4117 | 0.4968 | 2853.17 | 2854.11 | 8201.6 | 1 | 2762.3 | 42.6 | 2  | R.HGGSPQPLATTPLSQEPVNPPEASPTR.D                      |
| *                  | HsHeLa_Control-MG_Ti_10  | 5.8867 | 0.4397 | 2095.41 | 2094.3  | 5176.4 | 1 | 1484.7 | 68.4 | 4  | K.SKDSLQVQSCPGSLSLCAGVK.S                            |
| *                  | HsHeLa_Control-MG_Ti_10  | 4.0887 | 0.3388 | 1879.31 | 1879.05 | 3729.9 | 1 | 653.5  | 61.8 | 1  | K.DSLVQSCPGSLSLCAGVK.S                               |
| *                  | HsFLAG-Control_HeLa_NE   | 3.2816 | 0.3755 | 1884.88 | 1885.08 | 4204.1 | 1 | 330    | 50   | 1  | K.SSTPPGESYFGVSSLQLK.G                               |
| *                  | HsFLAG-MOCK_300mM_T      | 4.8751 | 0.4684 | 2274.91 | 2276.38 | 3989.5 | 1 | 800.3  | 60   | 16 | R.FQSDSSSYPTVDSNLLGQSR.L                             |
| *                  | HsHeLa_Control-MG_Ti_20  | 3.7357 | 0.2909 | 1980.48 | 1981.26 | 9257.7 | 1 | 1028.4 | 59.4 | 3  | K.FSPFPVQDRPESSLVFK.D                                |
| *                  | HsHeLa_Control-MG_Ti_20  | 3.5585 | 0.3918 | 1825.81 | 1826.01 | 6183.6 | 1 | 818.7  | 59.4 | 4  | K.SEEPAGQILSHLSSELK.E                                |
| *                  | HsFLAG-Control_HeLa_NE   | 5.4207 | 0.4448 | 1618.55 | 1617.67 | 9486.5 | 1 | 2136.8 | 73.3 | 9  | R.SSGHSSSELSPDAVEK.A                                 |
| *                  | HsHeLa_Control-MG_Ti_10  | 4.1344 | 0.4108 | 1903.9  | 1903.01 | 4163.2 | 1 | 1000   | 67.6 | 4  | R.SGSSQELDVKPSASPQER.S                               |
| *                  | HsHeLa_Control-MG_Ti_10  | 3.3388 | 0.2372 | 1371.78 | 1371.49 | 4395.2 | 1 | 748.6  | 75   | 2  | R.RSPSVSSPEPAEK.S                                    |
| *                  | HsF-IP-293-MG_Ti_103.17: | 4.5098 | 0.4684 | 1416.18 | 1415.65 | 8336.5 | 1 | 1487.5 | 71.4 | 5  | R.IPAASAAAMNLASAR.T                                  |
| *                  | HsF-IP-293-MG_Ti_103.17: | 3.3097 | 0.1893 | 1428.39 | 1426.61 | 2956.8 | 2 | 383.6  | 65.4 | 6  | R.TPAIPTAVNLADSR.T                                   |
| *                  | HsFLAG-Control_MG_293_   | 4.2501 | 0.482  | 1344.15 | 1342.56 | 6855.4 | 1 | 1692.4 | 80.8 | 2  | R.TPAAAAAMNLASPR.T                                   |
| *                  | HsFLAG-Control_HeLa_NE   | 3.1932 | 0.3883 | 1239.35 | 1239.42 | 3910.8 | 1 | 747.9  | 75   | 6  | R.TPTAPAVNLAGAR.T                                    |
| *                  | HsHeLa_Control-MG_Ti_10  | 5.2768 | 0.4278 | 2560.34 | 2560.82 | 4348   | 1 | 378.7  | 38.5 | 3  | R.TPAALAALSLTGSGTPPTAANYPSSSR.T                      |
| *                  | HsFLAG-Control_293_Ti_2( | 2.3416 | 0.2745 | 1378.29 | 1379.56 | 2964.5 | 8 | 121.4  | 50   | 1  | R.TPQAPASANLVGPR.S                                   |
| *                  | HsFLAG-Control_HeLa_NE   | 3.2321 | 0.1769 | 1379.13 | 1379.56 | 4301.7 | 1 | 654.5  | 65.4 | 6  | R.TPQAPASANLVGPR.S                                   |
| *                  | HsFLAG-Control_293_Ti_2( | 3.4918 | 0.2611 | 1379.37 | 1379.56 | 4099.5 | 1 | 866.1  | 73.1 | 5  | R.TPQAPASANLVGPR.S                                   |
| *                  | HsHeLa_Control-MG_Ti_20  | 3.0351 | 0.4454 | 1351.59 | 1352.49 | 2938.7 | 1 | 162.3  | 53.8 | 1  | R.SAHATAPVNIAGSR.T                                   |
| *                  | HsFLAG-Control_HeLa_NE   | 3.467  | 0.3351 | 1351.66 | 1352.49 | 5229.2 | 1 | 486.9  | 61.5 | 3  | R.SAHATAPVNIAGSR.T                                   |
| *                  | HsHeLa_Control-MG_Ti_20  | 2.8964 | 0.2917 | 1352.24 | 1352.49 | 6836.4 | 2 | 866.3  | 65.4 | 2  | R.SAHATAPVNIAGSR.T                                   |
| *                  | HsFLAG-Control_HeLa_NE   | 3.4    | 0.3969 | 1354.58 | 1352.49 | 5588.4 | 2 | 683.5  | 65.4 | 3  | R.SAHATAPVNIAGSR.T                                   |
| *                  | HsFLAG-Control_HeLa_NE   | 2.0336 | 0.1842 | 1300.61 | 1301.49 | 3633.4 | 1 | 172.7  | 53.8 | 1  | R.TAAALAPASLTSAR.M                                   |
| *                  | HsGST-MOCK_Ti_305.194:   | 3.323  | 0.2237 | 1385.9  | 1386.61 | 6279.5 | 1 | 1346.6 | 80.8 | 2  | R.MAPALSGANLTSR.V                                    |
| gi 33598968 ref NF |                          | 9      | 12     | 0.13    | 1349    | 153670 |   |        |      |    | LIM domain only 7 [Homo sapiens]                     |
| *                  | HsHeLa3_Ti_103.2494.249: | 4.9648 | 0.4812 | 2684.11 | 2684.96 | 3733.1 | 1 | 581.9  | 50   | 2  | R.VTTEIQLPSQSPVEEQSPASLSSLR.S                        |
| *                  | HsFLAG-MOCK_300mM_T      | 3.7162 | 0.4527 | 2584.22 | 2584.8  | 3947.9 | 1 | 431.4  | 42   | 1  | R.TPNNVVSTPAPSPDASQLASSLSSQK.E                       |
| *                  | HsFLAG-MOCK_300mM_T      | 4.2345 | 0.3421 | 3253.25 | 3251.49 | 5886.7 | 1 | 1099.8 | 30.8 | 2  | K.EVAATEEDVTRLPSPTSPFSSLSQDQAATSK.A                  |
| *                  | HsFLAG-MOCK_150mM_T      | 2.8325 | 0.2955 | 2748.5  | 2749.01 | 4975.7 | 1 | 301.7  | 34   | 1  | R.SQFFEQGSDDSVVDPDLPVPTISAPSR.W                      |

|                   |                          |        |        |         |         |        |   |        |      |                                                                              |
|-------------------|--------------------------|--------|--------|---------|---------|--------|---|--------|------|------------------------------------------------------------------------------|
| *                 | HsFLAG-MOCK_300mM_T      | 4.7523 | 0.2652 | 1732.6  | 1731.86 | 8766.9 | 1 | 2406.3 | 87.5 | 1 R.KWEQQLQEEQEQR                                                            |
| *                 | HsFLAG-MOCK_300mM_T      | 3.0306 | 0.2061 | 1360.74 | 1359.44 | 3769.2 | 2 | 615.1  | 77.3 | 1 R.RGESLDNLDSPR.S                                                           |
| *                 | HsHeLa3_Ti_104.1267.126  | 2.8311 | 0.2468 | 1411.67 | 1411.56 | 2607   | 1 | 405.7  | 71.4 | 1 R.NPSSVPPPSAGSVK.T                                                         |
| *                 | HsHeLa3_Ti_103.1222.122  | 4.302  | 0.4128 | 1505.31 | 1505.63 | 6634.7 | 1 | 825.3  | 60.7 | 2 K.TSTTGVAATQSPTR.S                                                         |
| *                 | HsFLAG-MOCK_300mM_T      | 2.9061 | 0.1352 | 1501.24 | 1498.65 | 5891.1 | 1 | 810.5  | 68.2 | 1 K.RICSYCNNILGK.G                                                           |
| gi 4505775 ref NF |                          | 3      | 7      | 0.13    | 361     | 39959  |   |        |      | solute carrier family 25 member 3 isoform b precursor [Homo sapiens]         |
| gi 47132595 ref N |                          | 3      | 7      | 0.13    | 361     | 39959  |   |        |      | solute carrier family 25 member 3 isoform b precursor [Homo sapiens]         |
|                   | HsFLAG-Control_293_Ti_1( | 3.6474 | 0.4172 | 2911.74 | 2912.33 | 9164.8 | 1 | 450.6  | 30.8 | 1 K.YYALCGFGGVLSCGLTHTAVVPLDLVK.C                                            |
|                   | HsFLAG-Control_MG_293_   | 2.2798 | 0.1689 | 1036.39 | 1037.2  | 9729.6 | 2 | 804.7  | 78.6 | 1 K.FGFYEVFK.V                                                               |
|                   | HsFLAG-Control_293_Ti_2( | 3.0263 | 0.2404 | 1362.04 | 1362.53 | 4524.2 | 2 | 503.4  | 68.2 | 5 R.IQTQPGYANTLR.D                                                           |
| gi 38016127 ref N |                          | 3      | 5      | 0.129   | 425     | 48063  |   |        |      | RNA binding motif protein 34 [Homo sapiens]                                  |
| *                 | HsFLAG-MOCK_300mM_T      | 4.109  | 0.393  | 2312.71 | 2313.74 | 4751.1 | 1 | 612.9  | 50   | 2 R.LASLFSSLEPQIQPVVVPVK.Q                                                   |
| *                 | Hs293FLP_TREX_Ti_104.1   | 4.1765 | 0.2288 | 2460.1  | 2458.6  | 6234.4 | 1 | 558.2  | 31.2 | 2 K.RNEEEESTSQIERPLSQEPK.K                                                   |
| *                 | Hs293FLP_TREX_Ti_103.1   | 3.6095 | 0.2518 | 1449.38 | 1449.66 | 6017.3 | 1 | 1147.8 | 79.2 | 1 R.TVFGNLPVTCNK.K                                                           |
| gi 13129094 ref N |                          | 2      | 3      | 0.129   | 232     | 25858  |   |        |      | hypothetical protein LOC79074 [Homo sapiens]                                 |
| *                 | HsHeLa3_Ti_104.2701.270  | 4.7352 | 0.4302 | 1967.62 | 1967.23 | 6414.4 | 1 | 1232.7 | 65.6 | 2 K.DSLTDLYVQHAIPLPQR.D                                                      |
| *                 | HsHeLa3_Ti_105.1568.156  | 1.9594 | 0.2226 | 1279.46 | 1280.51 | 5344.2 | 3 | 270.9  | 50   | 1 K.SPPLSPVGTTPVK.L                                                          |
| gi 15431290 ref N |                          | 2      | 8      | 0.129   | 178     | 20252  |   |        |      | ribosomal protein L11 [Homo sapiens]                                         |
| *                 | HsGST-MOCK_Ti_303.233    | 4.2803 | 0.4469 | 1547.41 | 1547.79 | 7785   | 1 | 1670.1 | 76.9 | 7 K.VLEQLTGQTPVFSK.A                                                         |
| *                 | Hs293FLP_TREX_Ti_102.1   | 3.104  | 0.1158 | 976.32  | 976.161 | 4034.8 | 1 | 893.7  | 87.5 | 1 K.YDGIILPGK.-                                                              |
| gi 11056044 ref N |                          | 2      | 7      | 0.128   | 289     | 32660  |   |        |      | pyrophosphatase (inorganic) 1 [Homo sapiens]                                 |
| *                 | HsHeLa_Control-MG_Ti_20  | 4.3674 | 0.3909 | 1864.47 | 1865.1  | 7572.6 | 1 | 1442.1 | 70   | 6 K.GQYISPFHDIPIYADK.D                                                       |
| *                 | HsHeLa_Control_Ti_102.22 | 3.8269 | 0.3661 | 2288.78 | 2289.46 | 7045.7 | 1 | 601    | 42.5 | 1 K.VIAINVDDPDAANYNDINDVK.R                                                  |
| gi 4506607 ref NF |                          | 2      | 3      | 0.128   | 188     | 21634  |   |        |      | ribosomal protein L18 [Homo sapiens]                                         |
| *                 | Hs293FLP_TREX_Ti_103.1   | 2.287  | 0.2994 | 1345.53 | 1346.52 | 3613.1 | 1 | 162.5  | 50   | 1 K.TAVVVGITDDVR.V                                                           |
| *                 | Hs293FLP_TREX_Ti_103.1   | 3.6837 | 0.2883 | 1117.54 | 1117.26 | 6808.6 | 1 | 1391.4 | 85   | 2 K.GCGTVLLSGPR.K                                                            |
| gi 5901928 ref NF |                          | 4      | 22     | 0.127   | 551     | 59209  |   |        |      | cleavage and polyadenylation specific factor 6, 68 kD subunit [Homo sapiens] |
| *                 | HsFLAG-MOCK_300mM_T      | 2.5187 | 0.2747 | 1749.75 | 1749.93 | 4092.7 | 2 | 430.5  | 53.6 | 1 K.RELHGQNPVVTCPNK.Q                                                        |
| *                 | HsHeLa3_Ti_103.2731.273  | 4.5426 | 0.4991 | 1667.74 | 1666.84 | 7141.6 | 1 | 1784.2 | 80.8 | 2 R.TPLSEAEFEEIMNR.N                                                         |
| *                 | HsHeLa3_Ti_104.5107.510  | 6.0854 | 0.5146 | 2453.66 | 2453.75 | 7072.2 | 1 | 2162.8 | 62.5 | 15 R.AVSDASAGDYGSIAITLVTAISLIK.Q                                             |
| *                 | HsHeLa3_Ti_104.2532.253  | 4.5392 | 0.4281 | 1801.8  | 1800.03 | 8603.6 | 1 | 1242.7 | 60   | 4 K.VLISSLQDCLHGIESK.S                                                       |
| gi 5032027 ref NF |                          | 3      | 14     | 0.127   | 425     | 47656  |   |        |      | retinoblastoma binding protein 4 [Homo sapiens]                              |
| *                 | HsHeLa3_Ti_106.3462.346  | 4.332  | 0.4903 | 3826.87 | 3828.38 | 9837.1 | 1 | 1070.3 | 25   | 2 K.NTPFLYDLVMTHALEWPSLTAQWLDPVTRPEGK.D                                      |
|                   | HsFLAG-Control_HeLa_NE   | 4.2739 | 0.3794 | 1472.49 | 1472.64 | 7189.3 | 1 | 1236.3 | 75   | 11 K.TPSSDVLVFDYTK.H                                                         |
|                   | Hs293FLP_TREX_Ti_102.2   | 2.5042 | 0.1334 | 974.95  | 974.148 | 4357.2 | 7 | 580.5  | 78.6 | 1 K.TVALWDLR.N                                                               |
| gi 4506753 ref NF |                          | 5      | 7      | 0.125   | 456     | 50228  |   |        |      | TATA binding protein interacting protein 49 kDa [Homo sapiens]               |
|                   | HsFLAG-Control_MG_293_   | 2.3175 | 0.2976 | 1080.45 | 1081.3  | 8451.9 | 1 | 551.2  | 54.5 | 1 R.AVLLAGPPGTGK.T                                                           |
|                   | HsFLAG-Control_MG_293_   | 3.2797 | 0.2057 | 1081.42 | 1081.3  | 6728.2 | 1 | 1272.9 | 77.3 | 1 R.AVLLAGPPGTGK.T                                                           |
|                   | HsHeLa3_Ti_103.3108.310  | 3.9209 | 0.3233 | 1387.08 | 1386.63 | 9725.9 | 1 | 2035.2 | 76.9 | 1 K.TALALAIQELGSK.V                                                          |
|                   | HsHeLa3_Ti_103.2559.255  | 3.9498 | 0.2317 | 1943.91 | 1944.22 | 4524.1 | 1 | 892.6  | 68.8 | 2 K.VPFCPMVGSEVYSTEIK.K                                                      |
|                   | HsFLAG-Control_HeLa_NE   | 3.1477 | 0.2634 | 1532.41 | 1531.84 | 5514.4 | 2 | 539.4  | 57.7 | 2 R.YSVQLLTPANLLAK.I                                                         |
| gi 18702323 ref N |                          | 1      | 4      | 0.125   | 96      | 10855  |   |        |      | dynein, cytoplasmic, light polypeptide 2B [Homo sapiens]                     |
| gi 7661822 ref NF |                          | 1      | 4      | 0.125   | 96      | 10922  |   |        |      | Roadblock-1 [Homo sapiens]                                                   |
| gi 29570775 ref N |                          | 1      | 4      | 0.19    | 63      | 7342   |   |        |      | cytoplasmic dynein light chain 2A isoform b [Homo sapiens]                   |
|                   | HsFLAG-Control_HeLa_S1(  | 3.9839 | 0.385  | 1447.69 | 1447.59 | 6036.8 | 1 | 1256.2 | 86.4 | 4 R.DIDPQNDLFLR.I                                                            |
| gi 58761546 ref N |                          | 6      | 9      | 0.124   | 852     | 92903  |   |        |      | amine oxidase (flavin containing) domain 2 isoform b [Homo sapiens]          |
| *                 | HsHeLa3_Ti_105.2238.223  | 4.8338 | 0.3754 | 1385.7  | 1384.66 | 6890.5 | 1 | 1921.9 | 82.1 | 3 K.VIIIGSGVSGLAAAR.Q                                                        |
| *                 | HsHeLa3_Ti_103.4319.431  | 4.0875 | 0.4156 | 2422.09 | 2421.83 | 9844   | 1 | 1434.6 | 45.8 | 2 K.GNYVADLGAMVVTGLGGNPMVAVVSK.Q                                             |
| *                 | HsHeLa3_Ti_102.2047.204  | 3.398  | 0.2879 | 1920.79 | 1919.1  | 2961.4 | 1 | 425.8  | 59.4 | 1 K.LQELEANPPSDVYVYSSR.D                                                     |

|                 |                          |        |        |         |         |         |     |        |      |   |                                                                                          |
|-----------------|--------------------------|--------|--------|---------|---------|---------|-----|--------|------|---|------------------------------------------------------------------------------------------|
| *               | HsHeLa3_Ti_106.2730.273  | 2.5302 | 0.2885 | 2179.03 | 2178.41 | 6087.8  | 1   | 478.8  | 44.7 | 1 | R.VFWDPSVNLFGHVGSTTASR.G                                                                 |
| *               | HsHeLa3_Ti_106.2247.224  | 2.698  | 0.2665 | 1571.14 | 1569.8  | 4783.1  | 1   | 833.4  | 71.4 | 1 | R.NYPATVHGALLSGLR.E                                                                      |
| *               | HsHeLa3_Ti_103.3016.301  | 2.5621 | 0.0965 | 1596.41 | 1596.89 | 7905.7  | 3   | 584.1  | 50   | 1 | R.IADQFLGAMYTLPR.Q                                                                       |
| gi 34335134 ref |                          | 2      | 4      | 0.124   | 322     | 35541   | 5.5 | U      |      |   | SEC13-like 1 isoform b [Homo sapiens]                                                    |
| gi 34335136 ref |                          | 2      | 4      | 0.123   | 325     | 35857   | 5.6 | U      |      |   | SEC13-like 1 isoform a [Homo sapiens]                                                    |
|                 | HsFLAG-Control_HeLa_S1(  | 3.6888 | 0.323  | 2390.33 | 2390.58 | 6419.4  | 1   | 907.3  | 50   | 1 | R.DVAWAPSIGLPTSTIASCSQDGR.V                                                              |
|                 | HsFLAG-Control_HeLa_NE   | 5.2187 | 0.4522 | 1706.96 | 1706.72 | 7325.7  | 1   | 1473.7 | 68.8 | 3 | K.GQGSVSASVTEGQQNEQ.-                                                                    |
| gi 16753233 ref |                          | 16     | 53     | 0.123   | 2541    | 269665  | 6   | U      |      |   | talin 1 [Homo sapiens]                                                                   |
| *               | HsFLAG-Control_HeLa_NE   | 3.7117 | 0.3129 | 1545.47 | 1544.66 | 8635.9  | 1   | 1214.8 | 69.2 | 2 | R.DDILNGSHPVSFDK.A                                                                       |
| *               | HsFLAG-Control_HeLa_S1(  | 4.9148 | 0.4172 | 2122.44 | 2123.46 | 10097.7 | 1   | 1244.1 | 52.5 | 3 | K.LLAALLEDEGGSGRPLLQAAK.G                                                                |
| *               | HsFLAG-Control_HeLa_S1(  | 4.6597 | 0.432  | 2140.94 | 2141.4  | 7474.3  | 1   | 1237   | 60.5 | 2 | K.VVAPTISPVCQEQLVEAGR.L                                                                  |
| *               | HsFLAG-Control_HeLa_NE   | 5.2899 | 0.4584 | 2092.56 | 2092.4  | 8103.8  | 1   | 1109.1 | 50   | 3 | R.GVGAAATAVTQALNELLQHVK.A                                                                |
| *               | HsFLAG-Control_HeLa_NE   | 3.5675 | 0.4032 | 1995.58 | 1996.19 | 7514.8  | 1   | 687.1  | 42.5 | 3 | K.QAAASATQTIAAAQHAASTPK.A                                                                |
| *               | HsFLAG-Control_HeLa_S1(  | 3.1706 | 0.3174 | 1458.37 | 1456.65 | 5064.5  | 1   | 421.3  | 53.8 | 1 | K.ASAGPQLLVQSCK.A                                                                        |
| *               | HsFLAG-Control_HeLa_S1(  | 4.1006 | 0.2778 | 1494.21 | 1493.79 | 4503.6  | 2   | 894    | 73.1 | 3 | K.AVAEQIPLLQGV.R.G                                                                       |
| *               | HsFLAG-Control_HeLa_S1(  | 4.5858 | 0.4133 | 2575.16 | 2574.85 | 9362.9  | 1   | 823.2  | 38   | 2 | K.AVSSAIAQLLGEVAQGNENYAGIAR.D                                                            |
| *               | HsFLAG-Control_HeLa_S1(  | 5.5864 | 0.445  | 2470.28 | 2470.78 | 6479.3  | 1   | 1041   | 47.9 | 4 | R.GVAALTSDDPAVQAIVLDTASDVLDK.A                                                           |
| *               | HsFLAG-Control_HeLa_NE   | 6.2256 | 0.5571 | 2027.31 | 2028.23 | 8780.8  | 1   | 2510.4 | 71.1 | 8 | R.LNEAAAGLNQAATELVQASR.G                                                                 |
| *               | HsFLAG-Control_HeLa_S1(  | 5.0704 | 0.3514 | 1522.55 | 1522.78 | 9707    | 1   | 2092.3 | 76.9 | 1 | K.TLAESALQLLYTAK.E                                                                       |
| *               | HsFLAG-Control_HeLa_S1(  | 4.524  | 0.4502 | 2249.08 | 2250.38 | 6286.7  | 1   | 847.9  | 52.5 | 4 | K.SNTSPEELGPLANQLTSDYGR.L                                                                |
| *               | HsFLAG-Control_HeLa_S1(  | 3.3526 | 0.2723 | 1244.15 | 1244.39 | 8203.5  | 1   | 1322.7 | 77.3 | 2 | K.VLVQNAAGSQEK.L                                                                         |
| *               | HsFLAG-Control_HeLa_NE   | 5.206  | 0.3432 | 2197.8  | 2196.51 | 6584.8  | 1   | 1104.4 | 54.8 | 8 | K.LGAASLGAEDPETQVVLINAVK.D                                                               |
| *               | HsFLAG-Control_HeLa_S1(  | 6.3389 | 0.4424 | 3053.58 | 3053.35 | 9687.7  | 1   | 2097.7 | 32.8 | 1 | K.GTEWVDPEDPTVIAENELLGAAAAIEAAK.K                                                        |
| *               | HsFLAG-Control_HeLa_S1(  | 3.8387 | 0.2756 | 1937.11 | 1937.07 | 7567.3  | 1   | 1248.7 | 59.4 | 6 | K.EADESLNFEEQILEAAK.S                                                                    |
| gi 17998551 ref |                          | 3      | 3      | 0.123   | 405     | 46276   | 5.5 | U      |      |   | serine (or cysteine) proteinase inhibitor, clade B (ovalbumin), member 12 [Homo sapiens] |
| *               | HsFLAG-Control_Hela_Ti_1 | 4.4746 | 0.2968 | 1979.78 | 1980.31 | 9301.9  | 1   | 1303.7 | 58.8 | 1 | K.DAINAETVLVLVNAVYFK.A                                                                   |
| *               | HsFLAG-Control_Hela_Ti_1 | 2.9063 | 0.1356 | 1677.94 | 1676.91 | 4034.6  | 6   | 389    | 50   | 1 | R.ADLTGISPSPNLYLSK.I                                                                     |
| *               | HsFLAG-Control_Hela_Ti_1 | 3.5322 | 0.2506 | 2028.06 | 2025.32 | 6484.9  | 1   | 641.1  | 53.3 | 1 | R.SWVEFNANHPFLFFIR.H                                                                     |
| gi 89058472 ref |                          | 37     | 129    | 0.123   | 106     | 11497   | 4.6 | U      |      |   | PREDICTED: similar to Ig kappa chain V-II region RPMI 6410 precursor [Homo sapiens]      |
| gi 89066978 ref |                          | 37     | 129    | 0.102   | 127     | 13922   | 4.6 | U      |      |   | PREDICTED: similar to Ig kappa chain V-II region Cum [Homo sapiens]                      |
| gi 89062133 ref |                          | 37     | 129    | 0.103   | 126     | 13837   | 8   | U      |      |   | PREDICTED: similar to Ig kappa chain V-II region RPMI 6410 precursor [Homo sapiens]      |
| gi 89059101 ref |                          | 37     | 129    | 0.123   | 106     | 11497   | 4.6 | U      |      |   | PREDICTED: similar to Ig kappa chain V-II region RPMI 6410 precursor [Homo sapiens]      |
|                 | HsF-IP-293-MG_Ti_102.16  | 2.4822 | 0.3036 | 1303.36 | 1304.4  | 4962.6  | 1   | 426.2  | 58.3 | 1 | R.FSGSGSGTDFTLK.I                                                                        |
|                 | Hs293FLP-MG_Ti_302.148   | 2.4021 | 0.2196 | 1303.37 | 1304.4  | 5772    | 1   | 565.4  | 62.5 | 1 | R.FSGSGSGTDFTLK.I                                                                        |
|                 | HsF-IP-293_Ti_102.1532.1 | 2.4622 | 0.1828 | 1303.41 | 1304.4  | 5967.2  | 1   | 498.8  | 58.3 | 1 | R.FSGSGSGTDFTLK.I                                                                        |
|                 | HsFLAG-MOCK_300mM_T      | 2.6432 | 0.155  | 1303.41 | 1304.4  | 5549.6  | 4   | 386.7  | 54.2 | 4 | R.FSGSGSGTDFTLK.I                                                                        |
|                 | HsFLAG-Control_HeLa_S1(  | 2.454  | 0.1032 | 1303.47 | 1304.4  | 8068.6  | 2   | 599.5  | 54.2 | 1 | R.FSGSGSGTDFTLK.I                                                                        |
|                 | HsHeLa_Control-MG_Ti_20  | 2.7908 | 0.3    | 1303.47 | 1304.4  | 4785    | 1   | 375.7  | 54.2 | 2 | R.FSGSGSGTDFTLK.I                                                                        |
|                 | HsFLAG-Control_HeLa_NE   | 2.4076 | 0.0967 | 1303.51 | 1304.4  | 8365.7  | 1   | 649.2  | 58.3 | 2 | R.FSGSGSGTDFTLK.I                                                                        |
|                 | HsFLAG-Control_Hela_Ti_1 | 2.4787 | 0.2146 | 1303.53 | 1304.4  | 6955.7  | 1   | 460    | 54.2 | 2 | R.FSGSGSGTDFTLK.I                                                                        |
|                 | HsFLAG-Control_HeLa_NE   | 2.4885 | 0.2399 | 1303.53 | 1304.4  | 6545    | 1   | 428.6  | 54.2 | 2 | R.FSGSGSGTDFTLK.I                                                                        |
|                 | HsFLAG-Control_HeLa_S1(  | 2.3958 | 0.1668 | 1303.53 | 1304.4  | 6705.5  | 1   | 555.3  | 58.3 | 2 | R.FSGSGSGTDFTLK.I                                                                        |
|                 | HsFLAG-Control_HeLa_S1(  | 2.2885 | 0.1132 | 1303.54 | 1304.4  | 7477.6  | 3   | 423.3  | 50   | 1 | R.FSGSGSGTDFTLK.I                                                                        |
|                 | HsFLAG-Control_293_Ti_1( | 2.3873 | 0.1671 | 1303.57 | 1304.4  | 5554.1  | 1   | 304.9  | 50   | 1 | R.FSGSGSGTDFTLK.I                                                                        |
|                 | HsFLAG-MOCK_150mM_T      | 2.1994 | 0.2202 | 1303.62 | 1304.4  | 5494.2  | 3   | 375.8  | 58.3 | 2 | R.FSGSGSGTDFTLK.I                                                                        |
|                 | Hs293FLP-MG_Ti_102.191   | 2.6432 | 0.2729 | 1303.66 | 1304.4  | 5482.3  | 1   | 513.4  | 62.5 | 3 | R.FSGSGSGTDFTLK.I                                                                        |
|                 | HsFLAG-Control_HeLa_NE   | 2.8651 | 0.1896 | 1303.69 | 1304.4  | 7306.2  | 1   | 623.7  | 62.5 | 2 | R.FSGSGSGTDFTLK.I                                                                        |
|                 | HsFLAG-Control_Hela_Ti_1 | 3.6589 | 0.3434 | 1303.7  | 1304.4  | 7750.8  | 1   | 1082.8 | 70.8 | 2 | R.FSGSGSGTDFTLK.I                                                                        |
|                 | HsFLAG-Control_HeLa_NE   | 2.3983 | 0.2314 | 1303.71 | 1304.4  | 7335.3  | 1   | 530.1  | 58.3 | 1 | R.FSGSGSGTDFTLK.I                                                                        |

|                   |                          |        |        |         |         |         |   |        |      |    |                                                                      |
|-------------------|--------------------------|--------|--------|---------|---------|---------|---|--------|------|----|----------------------------------------------------------------------|
|                   | Hs293FLP_Ti_302.1695.16  | 2.6276 | 0.2038 | 1303.72 | 1304.4  | 5302    | 2 | 335.2  | 54.2 | 2  | R.FSGSGSGTDFTLK.I                                                    |
|                   | Hs293FLP-MG_Ti_202.206   | 3.8724 | 0.374  | 1304.24 | 1304.4  | 7809.5  | 1 | 1687.6 | 83.3 | 4  | R.FSGSGSGTDFTLK.I                                                    |
|                   | HsFLAG-Control_HeLa_S1   | 3.8098 | 0.3479 | 1304.24 | 1304.4  | 7119.9  | 1 | 1544   | 83.3 | 2  | R.FSGSGSGTDFTLK.I                                                    |
|                   | HsF-IP-293-MG_Ti_102.16  | 3.4709 | 0.3064 | 1304.27 | 1304.4  | 7647.3  | 2 | 914.9  | 66.7 | 2  | R.FSGSGSGTDFTLK.I                                                    |
|                   | HsFLAG-Control_293_Ti_1  | 3.3066 | 0.3009 | 1304.27 | 1304.4  | 7234.8  | 2 | 881.8  | 66.7 | 2  | R.FSGSGSGTDFTLK.I                                                    |
|                   | HsFLAG-Control_HeLa_NE   | 4.0584 | 0.3569 | 1304.28 | 1304.4  | 7412.3  | 1 | 1790.4 | 87.5 | 38 | R.FSGSGSGTDFTLK.I                                                    |
|                   | HsFLAG-Control_293_Ti_2  | 3.5765 | 0.3136 | 1304.29 | 1304.4  | 7784.8  | 1 | 1303.4 | 75   | 2  | R.FSGSGSGTDFTLK.I                                                    |
|                   | HsHeLa-FLAG-IP_S100_Ti   | 4.2429 | 0.3528 | 1304.31 | 1304.4  | 7675.1  | 1 | 1241.6 | 75   | 12 | R.FSGSGSGTDFTLK.I                                                    |
|                   | HsFLAG-Control_HeLa_S1   | 3.9044 | 0.3713 | 1304.34 | 1304.4  | 7345.3  | 1 | 1783.2 | 87.5 | 3  | R.FSGSGSGTDFTLK.I                                                    |
|                   | HsFLAG-Control_HeLa_S1   | 3.9647 | 0.3938 | 1304.38 | 1304.4  | 7559.8  | 1 | 2084   | 91.7 | 8  | R.FSGSGSGTDFTLK.I                                                    |
|                   | HsFLAG-Control_HeLa_NE   | 3.9064 | 0.3229 | 1304.41 | 1304.4  | 8364.8  | 1 | 1413.2 | 75   | 2  | R.FSGSGSGTDFTLK.I                                                    |
|                   | HsFLAG-Control_HeLa_NE   | 3.9037 | 0.3447 | 1304.43 | 1304.4  | 7714.9  | 1 | 1286.6 | 75   | 2  | R.FSGSGSGTDFTLK.I                                                    |
|                   | Hs293FLP_TREX_Ti_102.1   | 3.716  | 0.3385 | 1304.44 | 1304.4  | 7098.2  | 1 | 1625.6 | 83.3 | 5  | R.FSGSGSGTDFTLK.I                                                    |
|                   | HsFLAG-Control_293_Ti_2  | 2.237  | 0.082  | 1304.46 | 1304.4  | 6614.7  | 1 | 376.4  | 50   | 2  | R.FSGSGSGTDFTLK.I                                                    |
|                   | HsFLAG-MOCK_150mM_T      | 3.8755 | 0.3973 | 1304.47 | 1304.4  | 7824    | 1 | 1389.9 | 79.2 | 2  | R.FSGSGSGTDFTLK.I                                                    |
|                   | HsHeLa_Control-MG_Ti_20  | 4.0816 | 0.3492 | 1304.51 | 1304.4  | 8679.7  | 1 | 1676.5 | 83.3 | 2  | R.FSGSGSGTDFTLK.I                                                    |
|                   | HsHeLa_Control-MG_Ti_10  | 3.5662 | 0.332  | 1304.8  | 1304.4  | 6938.2  | 1 | 1435   | 79.2 | 2  | R.FSGSGSGTDFTLK.I                                                    |
|                   | Hs293FLP_Ti_302.1690.16  | 3.5838 | 0.3123 | 1305.25 | 1304.4  | 6880.5  | 1 | 992    | 70.8 | 2  | R.FSGSGSGTDFTLK.I                                                    |
|                   | Hs293FLP-MG_Ti_302.148   | 3.3516 | 0.3642 | 1306    | 1304.4  | 6959.5  | 1 | 1004.3 | 70.8 | 2  | R.FSGSGSGTDFTLK.I                                                    |
|                   | HsHeLa_Control_Ti_103.19 | 3.9922 | 0.2916 | 1306.15 | 1304.4  | 7658.2  | 1 | 980.5  | 70.8 | 3  | R.FSGSGSGTDFTLK.I                                                    |
| gi 13129018 ref N |                          | 1      | 2      | 0.122   | 188     | 21008   |   |        |      |    | hypothetical protein LOC79017 [Homo sapiens]                         |
| *                 | HsFLAG-Control_Hela_Ti_1 | 3.5986 | 0.3985 | 2623.83 | 2624.82 | 9037.5  | 1 | 492.2  | 34.1 | 2  | K.DVTGPDEESFLYFAYGSNLLTER.I                                          |
| gi 4502847 ref NF |                          | 1      | 5      | 0.122   | 172     | 18648   |   |        |      |    | cold inducible RNA binding protein [Homo sapiens]                    |
| *                 | HsFLAG-Control_293_Ti_2  | 5.1098 | 0.3943 | 2345.8  | 2346.6  | 8380.9  | 1 | 1073.7 | 47.5 | 5  | K.LFVGGLSFDTNEQSLEQVFSK.Y                                            |
| gi 56676335 ref N |                          | 19     | 42     | 0.121   | 2472    | 274464  |   |        |      |    | RAP1 interacting factor 1 [Homo sapiens]                             |
| *                 | HsFLAG-Control_HeLa_NE   | 4.4513 | 0.2794 | 1719.79 | 1718.94 | 6757.9  | 1 | 1128.5 | 66.7 | 2  | K.ITSELSEANALELLSK.L                                                 |
| *                 | HsFLAG-Control_HeLa_NE   | 4.8938 | 0.3149 | 1912.55 | 1911.17 | 10147.3 | 1 | 2535.1 | 71.9 | 3  | R.SGSFINLLQLEELGFR.S                                                 |
| *                 | HsFlag1P_Ti_104.3553.355 | 3.0881 | 0.2791 | 1891.53 | 1892.13 | 5946.8  | 1 | 876.5  | 62.5 | 1  | K.SLIDNFALNPDLCSAK.R                                                 |
| *                 | HsFLAG-Control_HeLa_NE   | 2.6491 | 0.1673 | 1218.5  | 1218.31 | 6493.6  | 1 | 718.3  | 66.7 | 2  | K.GASSPYGAPGTPR.M                                                    |
| *                 | HsFlag1P_Ti_105.2915.291 | 3.6183 | 0.3018 | 1649.03 | 1649.93 | 7743.6  | 1 | 1272.1 | 64.3 | 1  | K.SLESIVKSEVFPVSK.T                                                  |
| *                 | HsFLAG-Control_HeLa_NE   | 3.5255 | 0.2736 | 2594.1  | 2594.84 | 10254.3 | 1 | 967    | 29.3 | 1  | K.FDGSENRPFPSPLNISSTVTVK.N                                           |
| *                 | HsFlag1P_Ti_104.2337.233 | 4.8446 | 0.246  | 1679.5  | 1679.93 | 9881.5  | 1 | 2425.9 | 80.8 | 2  | K.NNQETMIKTDFLPK.A                                                   |
| *                 | HsFLAG-Control_HeLa_NE   | 3.705  | 0.2878 | 1642.14 | 1642.89 | 9906.6  | 1 | 1332.8 | 69.2 | 2  | K.LIAEQLQENLIEK.G                                                    |
| *                 | HsFlag1P_Ti_105.2397.239 | 5.8448 | 0.306  | 2408.15 | 2408.71 | 3961.4  | 1 | 941.8  | 46.2 | 2  | K.LIAEQLQENLIEKGSNLHEK.T                                             |
| *                 | HsHeLa3_Ti_102.1194.119  | 4.448  | 0.4226 | 1594.44 | 1593.65 | 7780.8  | 1 | 1804.2 | 78.6 | 2  | K.TLGETSANAETEQNK.K                                                  |
| *                 | HsHeLa_Control_Ti_102.11 | 4.0342 | 0.3196 | 1521.6  | 1521.54 | 5676.5  | 1 | 1273.1 | 83.3 | 3  | K.SNESVDIQDQEEK.V                                                    |
| *                 | Hs293FLP-MG_Ti_202.318   | 3.1234 | 0.3759 | 1973.66 | 1974.18 | 5142.8  | 1 | 540.7  | 53.1 | 1  | K.YAEYSFTSLPVPESNLR.T                                                |
| *                 | HsFLAG-Control_HeLa_NE   | 3.0752 | 0.4028 | 1793.3  | 1793.88 | 6871.1  | 1 | 702.8  | 53.3 | 1  | K.EDNDTINDSLIVSETK.S                                                 |
| *                 | HsFLAG-Control_HeLa_NE   | 4.5111 | 0.3668 | 3560.89 | 3562.65 | 10471.5 | 1 | 910.2  | 23.5 | 1  | K.LNAQTEISEQTAAGELDGGNDVSDLHSSEETNTK.M                               |
| *                 | HsFlag1P_Ti_106.2730.273 | 4.0126 | 0.2922 | 1647.37 | 1646.89 | 5345.8  | 1 | 1339   | 75   | 2  | R.CVWSPLASPSTSILK.R                                                  |
| *                 | HsFLAG-Control_HeLa_NE   | 3.0723 | 0.2762 | 1491.97 | 1489.58 | 5231.2  | 1 | 463.6  | 66.7 | 3  | K.RSQEDEISSPVNK.V                                                    |
| *                 | HsFlag1P_Ti_103.2953.295 | 4.4926 | 0.2738 | 1733.84 | 1733.96 | 7384.5  | 1 | 1523.1 | 71.4 | 2  | K.TRGLEEIPVFDISEK.T                                                  |
| *                 | HsFlag1P_Ti_106.3244.324 | 3.8869 | 0.3012 | 2735.95 | 2737.12 | 3569.2  | 1 | 369.5  | 39.6 | 2  | K.SLSPDEERLVSDIIDPVALEIPLSK.N                                        |
| *                 | HsFLAG-Control_HeLa_NE   | 4.9507 | 0.3774 | 1822.54 | 1823.18 | 6233    | 1 | 1590.3 | 71.9 | 9  | R.LVSDIIDPVALEIPLSK.N                                                |
| gi 31317212 ref N |                          | 9      | 30     | 0.121   | 1169    | 128399  |   |        |      |    | ankyrin repeat and FYVE domain containing 1 isoform 1 [Homo sapiens] |
| *                 | HsHeLa_Control-MG_Ti_20  | 3.3643 | 0.3022 | 2113.77 | 2112.38 | 11749.5 | 1 | 978.7  | 50   | 1  | R.LLAIVADLYEQEQYSDLK.I                                               |
| *                 | Hs293FLP_Ti_303.1441.14  | 3.9883 | 0.3486 | 1914.96 | 1914.99 | 4721.7  | 1 | 630.6  | 58.8 | 2  | R.GSHTDAPDTATGNCLLQR.A                                               |
| *                 | HsHeLa_Control-MG_Ti_20  | 6.0613 | 0.3553 | 3081.21 | 3082.48 | 8176.4  | 1 | 1417.4 | 33   | 5  | R.HGLANLTAELLQQGANPNLQTEEALPLK.E                                     |
| *                 | HsHeLa_Control-MG_Ti_20  | 4.9873 | 0.4544 | 2080.91 | 2081.38 | 5050.8  | 1 | 1289.8 | 66.7 | 2  | K.ANALHATNNLQIIPDFSLK.D                                              |

|                    |                          |        |        |         |         |         |   |        |      |    |                                                                    |
|--------------------|--------------------------|--------|--------|---------|---------|---------|---|--------|------|----|--------------------------------------------------------------------|
| *                  | HsHeLa_Control-MG_Ti_20  | 5.0395 | 0.4164 | 2377.87 | 2378.73 | 6033.4  | 1 | 1152.7 | 59.5 | 4  | K.GNPPLWLALANNLEDIASTLVR.H                                         |
| *                  | HsHeLa_Control-MG_Ti_20  | 3.738  | 0.295  | 2379.03 | 2378.73 | 8179.2  | 2 | 1079   | 34.5 | 2  | K.GNPPLWLALANNLEDIASTLVR.H                                         |
| *                  | HsF-IP-293-MG_Ti_106.328 | 4.0174 | 0.3079 | 2379.56 | 2378.73 | 4634.4  | 1 | 471.3  | 47.6 | 3  | K.GNPPLWLALANNLEDIASTLVR.H                                         |
| *                  | HsHeLa_Control-MG_Ti_20  | 2.5544 | 0.131  | 1819.37 | 1818.17 | 8727.7  | 3 | 534.9  | 46.9 | 1  | K.LTPLHLAVQAGSEIIVR.N                                              |
| *                  | Hs293FLP-MG_Ti_203.274   | 4.0292 | 0.3904 | 2093.47 | 2094.34 | 7900    | 1 | 922.9  | 52.8 | 10 | R.LGVNNNQGVNIFNYQVATK.Q                                            |
| gi 4507349 ref NF  |                          | 7      | 0.121  | 1083    | 109944  | 9.9 U   |   |        |      |    | TBP-associated factor 4 [Homo sapiens]                             |
| *                  | HsFLAG-Control_HeLa_NE   | 4.5618 | 0.4136 | 3064.88 | 3064.43 | 10786.2 | 1 | 819.2  | 23.4 | 2  | R.SPGVQPQLVLGGAAQTASLGTATAVQTGTPQR.T                               |
| *                  | HsFLAG-Control_HeLa_NE   | 3.8289 | 0.3985 | 1733.76 | 1733.02 | 4783    | 1 | 642.5  | 60.7 | 3  | R.ELNSSPQPPLYVPLK.R                                                |
| *                  | HsHeLa_Control_Ti_104.33 | 3.8756 | 0.3074 | 2567.09 | 2565.97 | 3214.2  | 2 | 238.7  | 36   | 1  | K.TAATVTSALQPPVLSLTQPTQVGVGK.Q                                     |
| *                  | HsF-IP-293_Ti_103.1354.1 | 3.1534 | 0.3328 | 1286.7  | 1287.46 | 7926.9  | 1 | 1109   | 61.5 | 1  | K.ALSAVSAQAAAAQK.N                                                 |
| *                  | HsFLAG-Control_HeLa_NE   | 4.4688 | 0.4256 | 1488.23 | 1488.73 | 8068.7  | 1 | 1497.3 | 76.9 | 3  | R.ILATNSELVGTLTR.S                                                 |
| *                  | HsFlag1P_Ti_106.2568.256 | 5.2603 | 0.4196 | 1806.53 | 1807.02 | 8918.1  | 1 | 1595.6 | 67.9 | 3  | R.SCKDETFLLQAPLQR.R                                                |
| *                  | HsFlag1P_Ti_105.2385.238 | 5.4379 | 0.3169 | 1729.63 | 1729.97 | 7850.5  | 1 | 2003   | 78.6 | 2  | R.LQNLVEKISETAQQK.N                                                |
| gi 5174751 ref NF  |                          | 3      | 0.121  | 454     | 48755   | 5.1 U   |   |        |      |    | Yes-associated protein 1, 65 kD [Homo sapiens]                     |
| *                  | HsHeLa3_Ti_104.1472.147  | 2.3354 | 0.23   | 1213.69 | 1214.43 | 3307.8  | 2 | 177.8  | 60   | 1  | K.TANVPQTVPMR.L                                                    |
| *                  | HsHeLa3_Ti_105.1430.143  | 3.5901 | 0.5183 | 1782.38 | 1781.92 | 6839.1  | 1 | 812    | 52.9 | 2  | R.QASTDAGTAGALTPQHVR.A                                             |
| *                  | HsHeLa3_Ti_103.2083.208  | 3.671  | 0.1972 | 2758.86 | 2757.99 | 7463.6  | 1 | 566    | 36   | 1  | R.SQLPTLEQDGGTQNPVSSPGMSQELR.T                                     |
| gi 4826659 ref NF  |                          | 2      | 0.121  | 272     | 30629   | 6 U     |   |        |      |    | F-actin capping protein beta subunit [Homo sapiens]                |
| *                  | HsHeLa3_Ti_104.0004.000  | 3.1681 | 0.1929 | 2786.1  | 2785.13 | 2519.6  | 1 | 266.8  | 37.5 | 4  | K.NLSDLIDLVPSCLEDLLSSVDQPLK.I                                      |
| *                  | HsFLAG-Control_Hela_Ti_1 | 2.0139 | 0.1515 | 895.51  | 895.988 | 7755.4  | 3 | 516.5  | 71.4 | 1  | R.SVQTFADK.S                                                       |
| gi 4826774 ref NF  |                          | 1      | 0.121  | 165     | 17887   | 7.5 U   |   |        |      |    | interferon, alpha-inducible protein (clone IFI-15K) [Homo sapiens] |
| *                  | HsFLAG-Control_HeLa_S1(  | 5.7164 | 0.5347 | 1951.53 | 1951.31 | 6453.5  | 1 | 1017.8 | 57.9 | 2  | R.VPLASQGLGPGSTVLLVVDK.C                                           |
| gi 4557493 ref NF  |                          | 4      | 0.12   | 577     | 60959   | 6.8 U   |   |        |      |    | cleavage stimulation factor subunit 2 [Homo sapiens]               |
| *                  | HsFLAG-Control_HeLa_NE   | 3.3227 | 0.2498 | 1924.14 | 1925.15 | 3386.9  | 1 | 449.3  | 59.4 | 5  | R.SVFGNIPYEATEEQLK.D                                               |
| *                  | HsFLAG-Control_HeLa_NE   | 3.8239 | 0.2987 | 1452.62 | 1452.65 | 5509.9  | 1 | 1006.8 | 75   | 1  | K.DIFSEVGPVVVFR.L                                                  |
| *                  | HsFLAG-Control_HeLa_NE   | 3.6446 | 0.2198 | 2833.74 | 2833.08 | 6800.3  | 1 | 501.6  | 33.3 | 2  | K.SLGTGAPVIESPYGETISPEDAPESISK.A                                   |
| *                  | HsFLAG-Control_HeLa_NE   | 3.1341 | 0.1627 | 1302.37 | 1302.4  | 8388.3  | 1 | 1312.6 | 80   | 1  | K.LCVQNSPQEAR.N                                                    |
| gi 21362046 ref NF |                          | 7      | 0.12   | 541     | 60540   | 5.2 U   |   |        |      |    | hypothetical protein LOC79596 [Homo sapiens]                       |
| *                  | HsHeLa_Control_Ti_102.17 | 3.4306 | 0.2668 | 1442.47 | 1442.49 | 5100.3  | 1 | 1058.5 | 80   | 2  | K.EYEDEIDCLQK.E                                                    |
| *                  | HsHeLa_Control_Ti_102.30 | 5.075  | 0.4006 | 1898.99 | 1899.11 | 7952.9  | 1 | 1827.3 | 71.9 | 12 | K.TILDPLTLVQGNQNEK.H                                               |
| *                  | Hs293FLP-MG_Ti_103.173   | 2.1943 | 0.2152 | 934.62  | 935.111 | 6169.5  | 7 | 553    | 62.5 | 1  | R.FAVAALQSK.V                                                      |
| *                  | Hs283FLP_Ti_103.1514.15  | 2.7865 | 0.1439 | 934.63  | 935.111 | 7336.2  | 3 | 793    | 68.8 | 1  | R.FAVAALQSK.V                                                      |
| *                  | Hs283FLP_Ti_103.1519.15  | 3.2354 | 0.0957 | 935.31  | 935.111 | 4564.6  | 1 | 1089.6 | 87.5 | 2  | R.FAVAALQSK.V                                                      |
| *                  | Hs283FLP_Ti_102.2246.22  | 5.2062 | 0.3298 | 1550.59 | 1550.75 | 7656.2  | 1 | 2253   | 87.5 | 8  | K.YIEELESQAQLK.N                                                   |
| *                  | Hs283FLP_Ti_102.2026.20  | 5.0276 | 0.4255 | 1747.48 | 1747.82 | 7435.8  | 1 | 2379.7 | 82.1 | 6  | K.LVFDDFCSSNVSNK.D                                                 |
| gi 5579478 ref NF  |                          | 2      | 0.12   | 393     | 43439   | 6.6 U   |   |        |      |    | mitogen-activated protein kinase kinase 1 [Homo sapiens]           |
| *                  | HsFLAG-Control_HeLa_S1(  | 5.5847 | 0.3819 | 3151.89 | 3150.47 | 9837.1  | 1 | 1351.9 | 29.2 | 2  | K.KPTPIQLNPAPDGSVAVNGTSSAETNLEALQK.K                               |
| *                  | HsFLAG-Control_HeLa_S1(  | 4.9271 | 0.3301 | 1828.41 | 1828.08 | 7567.9  | 1 | 1618   | 70   | 2  | K.LPSGVFSLEFQDFVNC.C                                               |
| gi 5031857 ref NF  |                          | 3      | 0.12   | 332     | 36689   | 8.3 U   |   |        |      |    | lactate dehydrogenase A [Homo sapiens]                             |
| *                  | HsHeLa3_Ti_106.3572.357  | 2.5321 | 0.3822 | 2114.97 | 2113.43 | 6648.1  | 1 | 626.8  | 47.4 | 1  | K.GYTSSWAIGLSVADLAESIMK.N                                          |
| *                  | HsHeLa3_Ti_102.1395.139  | 2.9409 | 0.2052 | 1135.34 | 1135.22 | 6368.6  | 1 | 1264.7 | 88.9 | 2  | K.VTLTSEEEAR.L                                                     |
| *                  | HsHeLa3_Ti_103.1902.190  | 2.1672 | 0.2706 | 1118.68 | 1119.26 | 5673.6  | 2 | 579.3  | 66.7 | 2  | K.SADTLWGIQK.E                                                     |
| gi 4506743 ref NF  |                          | 2      | 0.12   | 208     | 24205   | 10.3 U  |   |        |      |    | ribosomal protein S8 [Homo sapiens]                                |
| *                  | HsGST-MOCK_Ti_104.122    | 3.7308 | 0.2795 | 1348.4  | 1348.55 | 6741.5  | 1 | 1062.7 | 77.3 | 4  | R.KYELGRPAANTK.I                                                   |
| *                  | Hs293FLP_TREX_Ti_102.1   | 4.4424 | 0.3308 | 1507.08 | 1507.68 | 7888.5  | 1 | 1342.7 | 70.8 | 2  | K.ISSLLLEEQFQQGK.L                                                 |
| gi 11321591 ref NF |                          | 2      | 0.12   | 209     | 24034   | 7.8 U   |   |        |      |    | high-mobility group box 2 [Homo sapiens]                           |
| *                  | HsHeLa3_Ti_104.2319.231  | 2.6019 | 0.1928 | 1498.04 | 1497.68 | 7096.5  | 1 | 627.9  | 59.1 | 1  | K.MSSYAFFVQTCR.E                                                   |
| *                  | HsHeLa3_Ti_104.1492.149  | 2.9763 | 0.2375 | 1314.68 | 1312.42 | 3592.6  | 1 | 453.6  | 66.7 | 1  | K.SEHPGLSIGDTAK.K                                                  |
| gi 4758950 ref NF  |                          | 2      | 0.12   | 216     | 23743   | 9.4 U   |   |        |      |    | peptidylprolyl isomerase B precursor [Homo sapiens]                |

|                    |                          |        |        |         |         |        |     |        |                                                                                          |    |                              |
|--------------------|--------------------------|--------|--------|---------|---------|--------|-----|--------|------------------------------------------------------------------------------------------|----|------------------------------|
| *                  | Hs293FLP_TREX_Ti_102.2   | 3.5418 | 0.3318 | 1365.16 | 1365.53 | 6911   | 1   | 1236.6 | 75                                                                                       | 2  | K.TVDNFVALATGEK.G            |
| *                  | Hs293FLP_TREX_Ti_102.2   | 4.0442 | 0.4084 | 1458.21 | 1458.61 | 8683.7 | 1   | 1392.4 | 70.8                                                                                     | 2  | K.DTNGSQFFITTVK.T            |
| gi 14741936 ref X  |                          | 1      | 2      | 0.12    | 92      | 10678  | 8.1 | U      | PREDICTED: small nuclear ribonucleoprotein polypeptide E-like 1 [Homo sapiens]           |    |                              |
| gi 89030198 ref X  |                          | 1      | 2      | 0.12    | 92      | 10678  | 8.1 | U      | PREDICTED: similar to small nuclear ribonucleoprotein E [Homo sapiens]                   |    |                              |
| gi 4507129 ref NF  |                          | 1      | 2      | 0.12    | 92      | 10804  | 9.4 | U      | small nuclear ribonucleoprotein polypeptide E [Homo sapiens]                             |    |                              |
|                    | HsFLAG-Control_293_Ti_20 | 3.277  | 0.2676 | 1330.35 | 1330.68 | 5047.3 | 3   | 705    | 75                                                                                       | 2  | K.VMVQPINLIFR.Y              |
| gi 5453629 ref NF  |                          | 3      | 14     | 0.118   | 406     | 44820  | 5.2 | U      | dynactin 2 [Homo sapiens]                                                                |    |                              |
| *                  | HsFLAG-Control_HeLa_NE   | 3.5946 | 0.1828 | 1670.45 | 1668.89 | 7538.1 | 1   | 1335.3 | 73.1                                                                                     | 2  | R.LLHEVQELTTEVEK.I           |
| *                  | HsFLAG-Control_HeLa_NE   | 4.8657 | 0.4234 | 1865.09 | 1866.12 | 7373.8 | 1   | 1096.8 | 55.6                                                                                     | 11 | K.LLGPDAAINLTPDGALAK.R       |
| *                  | HsFLAG-Control_HeLa_S10  | 3.6673 | 0.294  | 1601.59 | 1599.83 | 9271.3 | 1   | 1513.3 | 67.9                                                                                     | 1  | K.VSALDLAVLDQVEAR.L          |
| gi 5803036 ref NF  |                          | 2      | 3      | 0.118   | 305     | 30841  | 9.3 | U      | heterogeneous nuclear ribonucleoprotein A0 [Homo sapiens]                                |    |                              |
| *                  | Hs293FLP-MG_Ti_203.286   | 4.6456 | 0.3853 | 1691.39 | 1691.93 | 9889.5 | 1   | 2468.7 | 76.7                                                                                     | 2  | K.LFIGGLNVQTSSEGLR.G         |
| *                  | Hs293FLP-MG_Ti_202.353   | 3.5145 | 0.3107 | 2181.29 | 2179.35 | 9941.2 | 2   | 655.6  | 42.1                                                                                     | 1  | K.GDVAEGDLIEHFSQFGTVEK.A     |
| gi 18379349 ref NF |                          | 3      | 5      | 0.117   | 393     | 41920  | 6.3 | U      | vesicle amine transport protein 1 [Homo sapiens]                                         |    |                              |
| *                  | HsHeLa3_Ti_102.1218.121  | 3.0104 | 0.3851 | 1656.99 | 1656.74 | 5980.7 | 1   | 907.8  | 59.4                                                                                     | 1  | R.EVAEATGEDASSPPPK.T         |
| *                  | HsFLAG-Control_HeLa_S10  | 3.6606 | 0.3075 | 1443.8  | 1443.69 | 3355.8 | 1   | 780.3  | 71.4                                                                                     | 2  | R.PAAPPAPGPGQLTLR.L          |
| *                  | HsHeLa3_Ti_104.2521.252  | 3.0713 | 0.3222 | 1465.68 | 1464.76 | 5577.4 | 1   | 921.6  | 65.4                                                                                     | 2  | K.VVTYGMANLLTGPK.R           |
| gi 5174447 ref NF  |                          | 3      | 5      | 0.117   | 317     | 35077  | 7.7 | U      | guanine nucleotide binding protein (G protein), beta polypeptide 2-like 1 [Homo sapiens] |    |                              |
| *                  | HsFLAG-Control_MG_293_   | 3.6847 | 0.3488 | 1367.57 | 1367.55 | 6727.3 | 1   | 1527.2 | 81.8                                                                                     | 3  | R.YWLCAATGPSIK.I             |
| *                  | HsFLAG-Control_293_Ti_20 | 4.4339 | 0.4001 | 1789.52 | 1790.06 | 9041.2 | 1   | 1774.9 | 70                                                                                       | 1  | K.IIVDELKQEVISTSSK.A         |
| *                  | Hs293FLP_TREX_Ti_105.1   | 2.756  | 0.1176 | 1060.28 | 1060.24 | 4620.3 | 6   | 897.2  | 81.2                                                                                     | 1  | R.VWQVTIGTR.-                |
| gi 6005926 ref NF  |                          | 6      | 17     | 0.116   | 475     | 53501  | 9.1 | U      | U2 (RNU2) small nuclear RNA auxiliary factor 2 isoform a [Homo sapiens]                  |    |                              |
| gi 60279268 ref NF |                          | 6      | 17     | 0.117   | 471     | 53121  | 9.1 | U      | U2 (RNU2) small nuclear RNA auxiliary factor 2 isoform b [Homo sapiens]                  |    |                              |
|                    | HsHeLa_Control-MG_Ti_20  | 4.9019 | 0.4649 | 2133.65 | 2134.44 | 5556.7 | 1   | 766.5  | 52.5                                                                                     | 11 | R.LGGLTQAPGNPVLAVQINQDK.N    |
|                    | HsHeLa3_Ti_104.2343.234  | 5.0824 | 0.5003 | 2133.99 | 2134.44 | 4187   | 1   | 828.7  | 60                                                                                       | 1  | R.LGGLTQAPGNPVLAVQINQDK.N    |
|                    | HsHeLa3_Ti_104.2335.233  | 5.1467 | 0.1884 | 2136.64 | 2134.44 | 8078.6 | 1   | 1767   | 40                                                                                       | 2  | R.LGGLTQAPGNPVLAVQINQDK.N    |
|                    | HsHeLa3_Ti_104.2987.298  | 2.9821 | 0.1317 | 1045.11 | 1044.2  | 4810   | 2   | 968.6  | 92.9                                                                                     | 1  | K.NFAFLEFR.S                 |
|                    | HsFLAG-Control_HeLa_NE   | 3.2017 | 0.2066 | 1806.87 | 1807.06 | 4510   | 1   | 357.5  | 46.7                                                                                     | 1  | K.LFIGGLPNYLNDDQVK.E         |
|                    | Hs293FLP_TREX_Ti_103.2   | 2.6443 | 0.2136 | 1105.08 | 1105.32 | 5602.4 | 1   | 925.3  | 77.8                                                                                     | 1  | K.ELLTSFGPLK.A               |
| gi 38327552 ref NF |                          | 3      | 12     | 0.116   | 466     | 52164  | 5.5 | U      | Ras-GTPase-activating protein SH3-domain-binding protein [Homo sapiens]                  |    |                              |
| gi 5031703 ref NF  |                          | 3      | 12     | 0.116   | 466     | 52164  | 5.5 | U      | Ras-GTPase-activating protein SH3-domain-binding protein [Homo sapiens]                  |    |                              |
|                    | HsFLAG-Control_HeLa_NE   | 3.4501 | 0.2299 | 1886.5  | 1886.03 | 8245.8 | 4   | 551.2  | 47.1                                                                                     | 2  | K.SSSPAPADIAQTVQEDLR.T       |
|                    | HsFLAG-Control_HeLa_S10  | 2.9522 | 0.4059 | 1879.87 | 1880.24 | 4242.5 | 5   | 261.8  | 47.2                                                                                     | 1  | K.NLPPSGAVPVTGIPPHVVK.V      |
|                    | HsFLAG-Control_HeLa_NE   | 4.8609 | 0.39   | 1938.62 | 1939.18 | 8312.2 | 1   | 1629.3 | 65.6                                                                                     | 9  | K.LPNFGFVVDSEPVQK.V          |
| gi 46877102 ref NF |                          | 2      | 7      | 0.116   | 251     | 27372  | 6.3 | U      | upstream stimulatory factor 1 isoform 2 [Homo sapiens]                                   |    |                              |
| gi 6005934 ref NF  |                          | 2      | 7      | 0.094   | 310     | 33538  | 5.5 | U      | upstream stimulatory factor 1 isoform 1 [Homo sapiens]                                   |    |                              |
|                    | HsHeLa3_Ti_104.2457.245  | 3.9063 | 0.2217 | 1217.48 | 1215.44 | 6496.8 | 1   | 1282.8 | 88.9                                                                                     | 3  | K.INNWIVQLSK.I               |
|                    | HsFLAG-Control_HeLa_NE   | 3.819  | 0.2914 | 2200.25 | 2199.42 | 9538   | 1   | 890.1  | 47.2                                                                                     | 4  | R.LSEELQGLDQLDNDVLR.Q        |
| gi 25470886 ref NF |                          | 4      | 6      | 0.115   | 407     | 43383  | 8.6 | U      | DAZ associated protein 1 isoform b [Homo sapiens]                                        |    |                              |
| gi 25470890 ref NF |                          | 4      | 6      | 0.124   | 378     | 40530  | 8.3 | U      | DAZ associated protein 1 isoform a [Homo sapiens]                                        |    |                              |
|                    | HsHeLa3_Ti_103.3307.330  | 3.1596 | 0.1301 | 1928.18 | 1926.16 | 6253.2 | 1   | 593.5  | 53.3                                                                                     | 1  | R.SYFSQYGEVDCVIMK.D          |
|                    | HsHeLa3_Ti_106.2150.215  | 3.7959 | 0.321  | 1799.97 | 1799.99 | 3129.2 | 1   | 495    | 70                                                                                       | 2  | K.IFVGIPHNCGETELR.E          |
|                    | HsHeLa3_Ti_104.1385.138  | 2.3466 | 0.1491 | 1513.69 | 1514.6  | 5122.5 | 1   | 370.6  | 53.6                                                                                     | 1  | K.SQAPGQPGASQWGSR.V          |
|                    | HsHeLa3_Ti_104.1383.138  | 3.6957 | 0.4679 | 1514.7  | 1514.6  | 4148.1 | 1   | 826.3  | 78.6                                                                                     | 2  | K.SQAPGQPGASQWGSR.V          |
| gi 5453597 ref NF  |                          | 2      | 5      | 0.115   | 286     | 32923  | 5.7 | U      | F-actin capping protein alpha-1 subunit [Homo sapiens]                                   |    |                              |
| *                  | HsHeLa_Control-MG_Ti_20  | 2.9681 | 0.2561 | 2089.59 | 2090.3  | 4298.7 | 1   | 496.8  | 55.9                                                                                     | 3  | K.FITHAPPGEFNEVFNDVR.L       |
| *                  | HsHeLa3_Ti_105.2747.274  | 2.8857 | 0.3662 | 1572.62 | 1571.9  | 3103.2 | 1   | 483.7  | 67.9                                                                                     | 2  | K.FTITPPTAQVGVVK.I           |
| gi 5031755 ref NF  |                          | 4      | 6      | 0.114   | 633     | 70943  | 8.1 | U      | heterogeneous nuclear ribonucleoprotein R [Homo sapiens]                                 |    |                              |
| *                  | HsHeLa3_Ti_103.2578.257  | 4.0533 | 0.3852 | 2508.12 | 2508.79 | 5277.2 | 1   | 652    | 45.8                                                                                     | 2  | K.YGGPPDSVYSGVQPGIGTEVFVGK.I |

|                   |                         |        |        |         |         |         |      |        |      |   |                                                                    |
|-------------------|-------------------------|--------|--------|---------|---------|---------|------|--------|------|---|--------------------------------------------------------------------|
| *                 | HsHeLa3_Ti_104.2797.279 | 2.6213 | 0.1567 | 1941.83 | 1942.18 | 7854.4  | 4    | 522.1  | 43.8 | 1 | K.VTEGLVDVILYHQPD DK.K                                             |
| *                 | HsHeLa3_Ti_103.3139.313 | 4.1473 | 0.3156 | 1461.63 | 1461.65 | 6486.2  | 1    | 1394.1 | 75   | 2 | R.NLATTVTEEILEK.S                                                  |
| *                 | HsFLAG-Control_HeLa_NE  | 4.0783 | 0.3025 | 1909.63 | 1910.17 | 8819.9  | 1    | 1060.6 | 56.2 | 1 | K.EIEGEEIEIVLAKPPDK.K                                              |
| gi 26051237 ref N |                         | 4      | 6      | 0.114   | 507     | 55436   | 7    | U      |      |   | nucleoporin 54kDa [Homo sapiens]                                   |
| *                 | HsHeLa3_Ti_104.2713.271 | 3.7815 | 0.3388 | 1436.7  | 1436.61 | 8139.4  | 1    | 1315.1 | 77.3 | 1 | K.WNQLQAFWGTGK.G                                                   |
| *                 | HsFLAG-Control_HeLa_NE  | 2.8121 | 0.2398 | 1630.49 | 1630.84 | 10259.7 | 9    | 594.1  | 46.7 | 1 | K.VLGGNQLTVNVEGTK.T                                                |
| *                 | HsFLAG-Control_HeLa_NE  | 4.6732 | 0.314  | 1503.4  | 1503.69 | 6698.1  | 1    | 1749.4 | 87.5 | 1 | R.LDIISEDISELQK.N                                                  |
| *                 | HsFLAG-Control_HeLa_NE  | 5.3532 | 0.4318 | 1903.66 | 1903.14 | 9229.7  | 1    | 2625.5 | 78.1 | 3 | R.VQLDTIQGELNAPTQFK.G                                              |
| gi 7662238 ref N  |                         | 10     | 25     | 0.113   | 1341    | 151887  | 6.4  | U      |      |   | apoptotic chromatin condensation inducer 1 [Homo sapiens]          |
| *                 | HsFLAG-Control_HeLa_NE  | 5.13   | 0.3828 | 2118.76 | 2119.12 | 4990.2  | 1    | 889.6  | 61.1 | 5 | K.LSEGSQPAEEEEEDQETPSR.N                                           |
| *                 | Hs293FLP-MG_Ti_202.309  | 2.5669 | 0.2528 | 2421.61 | 2422.74 | 5792.2  | 2    | 301.3  | 36.4 | 1 | K.ASLVALPEQTASEEETPPPLTK.E                                         |
| *                 | HsHeLa3_Ti_105.2864.286 | 3.2343 | 0.2643 | 1721.83 | 1722.08 | 4936.1  | 1    | 786    | 63.3 | 2 | R.SAQPLPLKIEELALAK.G                                               |
| *                 | Hs293FLP_Ti_303.1397.13 | 4.8522 | 0.3481 | 3340.55 | 3340.46 | 4417.5  | 1    | 894.9  | 34.5 | 2 | K.KCEAEEAEPAAATQPQTSETQTSHLPESER.I                                 |
| *                 | Hs293FLP-MG_Ti_205.171  | 3.0111 | 0.2716 | 1303.57 | 1304.53 | 5545    | 1    | 545.5  | 63.6 | 2 | K.KPSISITTESLK.S                                                   |
| *                 | Hs293FLP-MG_Ti_205.171  | 3.4831 | 0.2651 | 1304.58 | 1304.53 | 7657    | 1    | 1482.9 | 81.8 | 2 | K.KPSISITTESLK.S                                                   |
| *                 | HsFLAG-Control_HeLa_NE  | 3.5023 | 0.2143 | 1305.41 | 1304.53 | 8039.7  | 1    | 1059.4 | 72.7 | 5 | K.KPSISITTESLK.S                                                   |
| *                 | HsHeLa_Control-MG_Ti_20 | 5.0039 | 0.3987 | 2561.4  | 2560.87 | 6627.6  | 1    | 901.1  | 35.9 | 2 | K.SLIPDIKPLAGQEAVVDLHADDSR.I                                       |
| *                 | Hs293FLP_Ti_304.1483.14 | 2.7314 | 0.2211 | 1105.4  | 1104.29 | 3459    | 3    | 600.6  | 77.8 | 1 | K.KVTLGDTLTR.R                                                     |
| *                 | HsHeLa_Control-MG_Ti_20 | 3.9141 | 0.24   | 2105.78 | 2104.42 | 5172.6  | 1    | 513.8  | 50   | 3 | K.AAPCIYWLPLTDSQIVQK.E                                             |
| gi 9506671 ref N  |                         | 3      | 4      | 0.113   | 524     | 56876   | 6.3  | U      |      |   | hypothetical protein LOC54502 [Homo sapiens]                       |
| *                 | HsHeLa3_Ti_103.3308.330 | 4.4128 | 0.4763 | 2010.01 | 2009.33 | 3937    | 1    | 1038.2 | 71.1 | 2 | K.VPEGVAGAPNEAALLALMER.T                                           |
| *                 | HsHeLa3_Ti_104.1808.180 | 3.4568 | 0.3008 | 1399.18 | 1398.48 | 4407.2  | 1    | 964.6  | 81.8 | 1 | K.SFGQFNPGCVER.V                                                   |
| *                 | HsHeLa3_Ti_106.2836.283 | 3.4428 | 0.2525 | 2694.06 | 2695.13 | 3459.7  | 1    | 401.5  | 42.3 | 1 | R.IPTAGIYGASYVPFAAPATATIATLQK.N                                    |
| gi 38146107 ref N |                         | 3      | 5      | 0.113   | 434     | 50560   | 11.3 | U      |      |   | hypothetical protein LOC65117 isoform a [Homo sapiens]             |
| gi 38146113 ref N |                         | 3      | 5      | 0.131   | 375     | 43805   | 11.4 | U      |      |   | hypothetical protein LOC65117 isoform b [Homo sapiens]             |
| gi 38146109 ref N |                         | 3      | 5      | 0.243   | 202     | 22395   | 8.8  | U      |      |   | hypothetical protein LOC65117 isoform c [Homo sapiens]             |
|                   | HsHeLa3_Ti_103.2646.264 | 4.1692 | 0.3333 | 2279.78 | 2278.63 | 2721.2  | 1    | 687.7  | 57.1 | 2 | K.ALAETGIAVPSYYNPAAVNPMK.F                                         |
|                   | HsHeLa3_Ti_102.1345.134 | 4.5783 | 0.5474 | 1792.62 | 1792.73 | 5882    | 1    | 1340.9 | 73.3 | 2 | K.SEDEAGCSSVDEESYK.T                                               |
|                   | HsHeLa3_Ti_104.1980.198 | 3.2869 | 0.2801 | 1144.39 | 1144.35 | 4555.5  | 1    | 666.5  | 75   | 1 | R.GMGLGFTSSMR.G                                                    |
| gi 4504011 ref N  |                         | 1      | 2      | 0.113   | 274     | 30727   | 6    | U      |      |   | glutamate-cysteine ligase regulatory protein [Homo sapiens]        |
| *                 | HsFLAG-Control_HeLa_S10 | 4.3063 | 0.2547 | 3649.64 | 3650.13 | 7926.5  | 1    | 1088.7 | 28.3 | 2 | K.ELLSEASFQEALQESIPDIQAHEWVPLWLLR.Y                                |
| gi 38570081 ref N |                         | 2      | 2      | 0.112   | 483     | 51617   | 8.5  | U      |      |   | CUG triplet repeat, RNA-binding protein 1 isoform 2 [Homo sapiens] |
| gi 71164871 ref N |                         | 2      | 2      | 0.111   | 486     | 52063   | 8.5  | U      |      |   | CUG triplet repeat, RNA-binding protein 1 isoform 3 [Homo sapiens] |
| gi 5729794 ref N  |                         | 2      | 2      | 0.112   | 482     | 51546   | 8.5  | U      |      |   | CUG triplet repeat, RNA-binding protein 1 isoform 1 [Homo sapiens] |
|                   | HsFLAG-MOCK_300mM_T     | 2.8778 | 0.2283 | 2017.08 | 2016.38 | 6072.8  | 2    | 623.7  | 50   | 1 | K.VLPGMHHPQMMPADSEK.N                                              |
|                   |                         |        |        |         |         |         |      |        |      |   | K.EGPEGANLFIYHLPQEFQDQLLQMFMPFGNVVSAK.                             |
|                   | HsHeLa3_Ti_105.4915.491 | 4.6947 | 0.3951 | 4040.86 | 4041.59 | 8682.3  | 1    | 565    | 19.3 | 1 | V                                                                  |
| gi 5032179 ref N  |                         | 5      | 15     | 0.111   | 835     | 88550   | 5.8  | U      |      |   | tripartite motif-containing 28 protein [Homo sapiens]              |
|                   |                         |        |        |         |         |         |      |        |      |   | K.RSTAPSAASASASAAASSPAGGGAEALLEHCGV                                |
| *                 | HsFLAG-MOCK_300mM_T     | 5.3421 | 0.4575 | 3601.47 | 3600.81 | 10268.4 | 1    | 1448.3 | 26.4 | 2 | CR.E                                                               |
| *                 | Hs293FLP_TREX_Ti_104.2  | 3.2793 | 0.232  | 1520.58 | 1521.63 | 8758.4  | 1    | 1215.6 | 72.7 | 1 | K.DHQYQFLEDAVR.N                                                   |
| *                 | HsFLAG-Control_HeLa_NE  | 4.5835 | 0.4054 | 1659.6  | 1659.88 | 6411.8  | 1    | 1452.2 | 75   | 7 | R.LDLDLTADSQPPVFK.V                                                |
| *                 | HsFLAG-Control_HeLa_NE  | 3.6295 | 0.3484 | 1953.92 | 1954.19 | 3183.3  | 1    | 426.9  | 59.4 | 3 | K.VFPGSTTEDYNLIVIER.G                                              |
| *                 | HsFLAG-Control_HeLa_NE  | 3.4373 | 0.2478 | 1200.56 | 1200.38 | 7045.9  | 1    | 1346.7 | 80   | 2 | K.ADVQSIIGLQR.F                                                    |
| gi 10835051 ref N |                         | 5      | 7      | 0.111   | 748     | 85473   | 6.7  | U      |      |   | cysteinyl-tRNA synthetase isoform b [Homo sapiens]                 |
| gi 62240994 ref N |                         | 5      | 7      | 0.112   | 738     | 84472   | 6.4  | U      |      |   | cysteinyl-tRNA synthetase isoform d [Homo sapiens]                 |
| gi 62240992 ref N |                         | 5      | 7      | 0.1     | 831     | 94638   | 6.8  | U      |      |   | cysteinyl-tRNA synthetase isoform c [Homo sapiens]                 |
| gi 21269877 ref N |                         | 5      | 7      | 0.114   | 726     | 82846   | 7    | U      |      |   | cysteinyl-tRNA synthetase isoform a [Homo sapiens]                 |
|                   | HsGST-MOCK_Ti_305.359   | 3.1838 | 0.2234 | 1754.58 | 1753.01 | 9058.5  | 1    | 852.4  | 56.7 | 1 | K.RPEAAQLLEDVQAALK.P                                               |



|                   |                          |        |        |         |         |         |      |        |      |   |                                                                                      |
|-------------------|--------------------------|--------|--------|---------|---------|---------|------|--------|------|---|--------------------------------------------------------------------------------------|
|                   | HsGST-MOCK_Ti_302.513i   | 5.5714 | 0.4179 | 2602.14 | 2602.78 | 7353.1  | 1    | 934    | 47.7 | 2 | K.DLLSDWLDSTLGCDVTDNSIFSK.L                                                          |
|                   | HsGST-MOCK_Ti_302.305i   | 3.3564 | 0.3508 | 1651.7  | 1651.9  | 2893.4  | 1    | 650.9  | 76.9 | 2 | R.VSEYVPEIVNFVQK.I                                                                   |
|                   | HsGST-MOCK_Ti_302.240i   | 4.7413 | 0.4708 | 2096.04 | 2096.23 | 11015.6 | 1    | 1383.8 | 55.9 | 1 | K.DTLDYSSNTMESALQYEK.F                                                               |
|                   | HsGST-MOCK_Ti_303.322i   | 3.9041 | 0.3458 | 1354.22 | 1354.59 | 8426.8  | 1    | 1524   | 81.8 | 1 | K.VPEILQLSDALR.D                                                                     |
| gi 5803111 ref NF |                          | 2      | 5      | 0.111   | 306     | 34820   | 10.1 | U      |      |   | EBNA1 binding protein 2 [Homo sapiens]                                               |
| *                 | HsGST-MOCK_Ti_303.269i   | 3.9638 | 0.3063 | 2189.88 | 2190.46 | 6493.2  | 4    | 399.3  | 38.1 | 1 | R.LDVTLGVPVEIGGSEAPAPQNK.D                                                           |
| *                 | Hs293FLP_TREX_Ti_103.2   | 3.9253 | 0.3586 | 1238.56 | 1237.49 | 6999.6  | 1    | 1667.3 | 90.9 | 4 | R.QAQAAVLAVLPR.L                                                                     |
| gi 16753225 ref N |                          | 2      | 3      | 0.111   | 216     | 23503   | 10.9 | U      |      |   | ribosomal protein L14 [Homo sapiens]                                                 |
| gi 89036208 ref X |                          | 2      | 3      | 0.113   | 213     | 23259   | 10.9 | U      |      |   | PREDICTED: similar to 60S ribosomal protein L14 (CAG-ISL 7) isoform 2 [Homo sapiens] |
| gi 89036206 ref X |                          | 2      | 3      | 0.113   | 213     | 23259   | 10.9 | U      |      |   | PREDICTED: similar to 60S ribosomal protein L14 (CAG-ISL 7) isoform 1 [Homo sapiens] |
|                   | Hs293FLP_TREX_Ti_106.2   | 2.4976 | 0.2643 | 1232.4  | 1233.41 | 5263.4  | 1    | 504.7  | 59.1 | 2 | R.VAYVSFGPHAGK.L                                                                     |
|                   | HsGST-MOCK_Ti_303.278i   | 3.8399 | 0.1938 | 1355.94 | 1355.58 | 7630.6  | 1    | 1324.7 | 77.3 | 1 | K.LVAIVDVIDQNR.A                                                                     |
| gi 5902034 ref NF |                          | 4      | 9      | 0.11    | 501     | 55828   | 4.8  | U      |      |   | periodic tryptophan protein 1 [Homo sapiens]                                         |
| *                 | Hs293FLP_TREX_Ti_104.1   | 4.0701 | 0.4053 | 1110.46 | 1110.26 | 7547.5  | 1    | 1446   | 85   | 2 | K.PAASLAVHTDK.V                                                                      |
| *                 | HsHeLa_Control_Ti_105.33 | 4.8811 | 0.3779 | 2410.98 | 2410.69 | 4059.6  | 1    | 880.2  | 60   | 4 | K.VQTLQFHPFEAQTLSIGSYDK.S                                                            |
| *                 | Hs293FLP-MG_Ti_204.305i  | 4.4243 | 0.2617 | 2411.32 | 2410.69 | 8176.3  | 2    | 983.2  | 36.2 | 2 | K.VQTLQFHPFEAQTLSIGSYDK.S                                                            |
| *                 | HsHeLa_Control-MG_Ti_10  | 3.6917 | 0.3842 | 2655.26 | 2655.97 | 6872.9  | 1    | 573.1  | 40.9 | 1 | K.MGVLCSSCCPDLPIYAFGGQK.E                                                            |
| gi 38195084 ref N |                          | 4      | 11     | 0.11    | 347     | 39899   | 5.7  | U      |      |   | HMT1 hnRNP methyltransferase-like 2 isoform 2 [Homo sapiens]                         |
| gi 38195089 ref N |                          | 4      | 11     | 0.105   | 361     | 41486   | 5.5  | U      |      |   | HMT1 hnRNP methyltransferase-like 2 isoform 1 [Homo sapiens]                         |
| gi 38195087 ref N |                          | 4      | 11     | 0.111   | 343     | 39572   | 5.7  | U      |      |   | HMT1 hnRNP methyltransferase-like 2 isoform 3 [Homo sapiens]                         |
|                   | HsHeLa_Control-MG_Ti_20  | 3.1231 | 0.157  | 1351.94 | 1351.63 | 9671.8  | 1    | 1128.2 | 68.2 | 3 | K.ANKLDHVVTIHK.G                                                                     |
|                   | Hs293FLP-MG_Ti_105.169i  | 2.001  | 0.2222 | 1037.68 | 1038.28 | 4984.2  | 4    | 483.3  | 68.8 | 1 | K.LDHVVTIHK.G                                                                        |
|                   | Hs283FLP_Ti_102.1854.18i | 3.7094 | 0.397  | 1252.42 | 1252.41 | 6498.8  | 1    | 1258   | 80   | 1 | R.ATLYVTAIEDR.Q                                                                      |
|                   | Hs293FLP-MG_Ti_204.189   | 3.4565 | 0.3179 | 1725.55 | 1725.86 | 5574    | 1    | 681.6  | 60.7 | 6 | R.TGFSTSPESPYTHWK.Q                                                                  |
| gi 18375501 ref N |                          | 2      | 2      | 0.11    | 318     | 35554   | 8.1  | U      |      |   | APEX nuclease [Homo sapiens]                                                         |
| gi 18375505 ref N |                          | 2      | 2      | 0.11    | 318     | 35554   | 8.1  | U      |      |   | APEX nuclease [Homo sapiens]                                                         |
| gi 18375503 ref N |                          | 2      | 2      | 0.11    | 318     | 35554   | 8.1  | U      |      |   | APEX nuclease [Homo sapiens]                                                         |
|                   | HsHeLa3_Ti_103.3834.383i | 3.193  | 0.3535 | 1849.38 | 1849.1  | 4756.6  | 2    | 386.6  | 46.9 | 1 | R.QGFGELLQAVPLADSFH.H                                                                |
|                   | HsHeLa3_Ti_104.3683.368i | 3.7628 | 0.3371 | 2094.92 | 2093.39 | 5623.7  | 1    | 728.6  | 55.9 | 1 | R.LDYFLLSHSLLPALCDSK.I                                                               |
| gi 15149463 ref N |                          | 5      | 9      | 0.109   | 558     | 64256   | 7    | U      |      |   | caldesmon 1 isoform 4 [Homo sapiens]                                                 |
| gi 4826657 ref NF |                          | 5      | 9      | 0.113   | 538     | 62663   | 6.4  | U      |      |   | caldesmon 1 isoform 2 [Homo sapiens]                                                 |
| gi 44680105 ref N |                          | 5      | 9      | 0.077   | 793     | 93231   | 5.7  | U      |      |   | caldesmon 1 isoform 1 [Homo sapiens]                                                 |
| gi 15149467 ref N |                          | 5      | 9      | 0.108   | 564     | 65707   | 6.6  | U      |      |   | caldesmon 1 isoform 3 [Homo sapiens]                                                 |
| gi 15149465 ref N |                          | 5      | 9      | 0.115   | 532     | 61213   | 6.7  | U      |      |   | caldesmon 1 isoform 5 [Homo sapiens]                                                 |
|                   | HsHeLa3_Ti_102.1921.192i | 4.5587 | 0.4607 | 2100.1  | 2099.17 | 5170.3  | 1    | 952    | 61.1 | 2 | K.TTTTNTQVEGDDEAAFLER.L                                                              |
|                   | HsHeLa3_Ti_106.1616.161i | 2.1403 | 0.2184 | 1042.97 | 1042.18 | 4921.2  | 2    | 429.1  | 61.1 | 1 | K.STHQAAIVSK.I                                                                       |
|                   | HsHeLa3_Ti_102.1634.163i | 3.2871 | 0.2817 | 1339.63 | 1340.47 | 5594.5  | 1    | 550.9  | 68.2 | 2 | R.LEQYTSIAIEGTK.S                                                                    |
|                   | HsHeLa3_Ti_102.1642.164i | 3.6935 | 0.3559 | 1342.46 | 1340.47 | 6539.5  | 1    | 1785.9 | 90.9 | 2 | R.LEQYTSIAIEGTK.S                                                                    |
|                   | HsHeLa3_Ti_106.2056.205i | 3.4862 | 0.3861 | 1992.65 | 1992.28 | 4297.5  | 1    | 540.4  | 50   | 2 | K.SAKPTKPAASDLVPAEGVR.N                                                              |
| gi 42544123 ref N |                          | 4      | 7      | 0.109   | 548     | 59712   | 9.5  | U      |      |   | splicing factor 1 isoform 3 [Homo sapiens]                                           |
| gi 42544130 ref N |                          | 4      | 7      | 0.094   | 639     | 68330   | 9    | U      |      |   | splicing factor 1 isoform 1 [Homo sapiens]                                           |
| gi 42544125 ref N |                          | 4      | 7      | 0.094   | 638     | 68633   | 9.2  | U      |      |   | splicing factor 1 isoform 2 [Homo sapiens]                                           |
|                   | HsGST-MOCK_Ti_104.232i   | 5.16   | 0.4663 | 2936.8  | 2937.39 | 6633.5  | 1    | 1035.5 | 32   | 2 | R.HNLITEMVALNPDFKPPADYKPPATR.V                                                       |
|                   | HsHeLa3_Ti_104.4416.441i | 4.2831 | 0.4293 | 2401.38 | 2401.83 | 4214.1  | 1    | 508.7  | 50   | 2 | K.VMIPQDEYPEINFVGLLIGPR.G                                                            |
|                   | HsHeLa3_Ti_104.4415.441i | 5.3868 | 0.3658 | 2402.04 | 2401.83 | 8056.7  | 1    | 2362.9 | 46.2 | 2 | K.VMIPQDEYPEINFVGLLIGPR.G                                                            |
|                   | HsFLAG-MOCK_300mM_T      | 3.0595 | 0.1822 | 1475.52 | 1474.57 | 3067.1  | 4    | 464.7  | 70.8 | 1 | K.FQRPQDPQSAQDK.A                                                                    |
| gi 55769533 ref N |                          | 2      | 4      | 0.109   | 340     | 36568   | 5.4  | U      |      |   | PRKC, apoptosis, WT1, regulator [Homo sapiens]                                       |
| *                 | HsHeLa3_Ti_102.2575.257i | 3.2391 | 0.4333 | 2611.03 | 2611.7  | 2987.8  | 1    | 254.8  | 39.1 | 2 | R.STGVVNIPAAECLDEYEDDEAGQK.E                                                         |
| *                 | HsHeLa3_Ti_102.1235.123i | 3.2795 | 0.3497 | 1384.37 | 1384.4  | 4816.6  | 1    | 626.6  | 66.7 | 2 | K.STTSVSEEDVSSR.Y                                                                    |

|                   |                          |        |        |         |         |        |                                                                                                 |
|-------------------|--------------------------|--------|--------|---------|---------|--------|-------------------------------------------------------------------------------------------------|
| gi 14110428 ref N | 3                        | 3      | 0.109  | 303     | 33299   | 5.2 U  | heterogeneous nuclear ribonucleoprotein C isoform a [Homo sapiens]                              |
| gi 4758544 ref NF | 3                        | 3      | 0.114  | 290     | 31966   | 5.2 U  | heterogeneous nuclear ribonucleoprotein C isoform b [Homo sapiens]                              |
|                   | HsFLAG-Control_293_Ti_20 | 2.7732 | 0.1694 | 1317.84 | 1317.62 | 6993.2 | 2 960.6 68.2 1 R.VFIGNLNTLVVK.K                                                                 |
|                   | HsFlag1P_Ti_104.2693.269 | 2.6483 | 0.2296 | 1331.24 | 1330.49 | 6067.9 | 1 957.4 75 1 K.GFAFVQYVNER.N                                                                    |
|                   | Hs293FLP_TREX_Ti_102.2   | 2.5539 | 0.1185 | 1160.75 | 1160.31 | 5951.6 | 3 739.4 77.8 1 K.VDSLLENLEK.M                                                                   |
| gi 5729842 ref NF | 1                        | 6      | 0.109  | 184     | 20720   | 5.5 U  | glyoxalase I [Homo sapiens]                                                                     |
| *                 | Hs293FLP-MG_Ti_202.465   | 4.4177 | 0.3852 | 2303.54 | 2304.61 | 5570.4 | 1 919.2 57.9 6 K.GLAFIQDPDGYWIEILNPNK.M                                                         |
| gi 4506765 ref NF | 2                        | 9      | 0.109  | 101     | 11728   | 6.1 U  | S100 calcium-binding protein A4 [Homo sapiens]                                                  |
| gi 9845516 ref NF | 2                        | 9      | 0.109  | 101     | 11728   | 6.1 U  | S100 calcium-binding protein A4 [Homo sapiens]                                                  |
|                   | HsHeLa3_Ti_105.1908.190  | 2.9994 | 0.1538 | 1247.58 | 1248.48 | 6317.4 | 1 781.2 75 4 K.ALDVMVSTFHK.Y                                                                    |
|                   | HsHeLa3_Ti_105.1902.190  | 3.4107 | 0.1998 | 1249.28 | 1248.48 | 5493.9 | 3 831.6 70 5 K.ALDVMVSTFHK.Y                                                                    |
| gi 4507943 ref NF | 9                        | 19     | 0.107  | 1071    | 123386  | 6.1 U  | exportin 1 [Homo sapiens]                                                                       |
| *                 | HsFLAG-Control_HeLa_S10  | 3.8223 | 0.3896 | 2027.74 | 2028.27 | 10134  | 1 1304.2 58.8 4 K.LLSEEVDFSSGQITQVK.S                                                           |
| *                 | HsFLAG-Control_HeLa_NE   | 2.4926 | 0.1104 | 1068.42 | 1069.16 | 7554.3 | 2 576.8 68.8 1 K.DTDSINLYK.N                                                                    |
| *                 | HsHeLa3_Ti_104.4383.438  | 2.8706 | 0.3523 | 2149.48 | 2149.51 | 3938.3 | 1 276.8 44.1 2 K.YMLLPNQVWDSIIQQATK.N                                                           |
| *                 | HsFLAG-Control_HeLa_S10  | 2.8304 | 0.241  | 1295.78 | 1294.54 | 3769.9 | 2 526.5 72.7 1 K.AVGHPFVIQLGR.I                                                                 |
| *                 | HsFLAG-Control_HeLa_S10  | 4.0348 | 0.3307 | 2888.56 | 2888.29 | 8589.2 | 1 638.5 36 2 K.ISTSLNPGNPVNNQIFLQEYVANLLK.S                                                     |
| *                 | HsFLAG-Control_HeLa_S10  | 4.5173 | 0.372  | 2889.92 | 2888.29 | 7184.4 | 1 1011.3 32 1 K.ISTSLNPGNPVNNQIFLQEYVANLLK.S                                                    |
| *                 | HsFLAG-Control_HeLa_NE   | 5.05   | 0.3574 | 2890.19 | 2888.29 | 8918   | 1 1186.4 31 2 K.ISTSLNPGNPVNNQIFLQEYVANLLK.S                                                    |
| *                 | HsFLAG-Control_HeLa_S10  | 4.2437 | 0.4038 | 1910.59 | 1911.25 | 5552.5 | 1 1315.4 68.8 4 K.LFVTGLFSLNQDIPAFK.E                                                           |
| *                 | HsFLAG-Control_HeLa_NE   | 3.2129 | 0.3799 | 1758.56 | 1758.84 | 7592.1 | 2 404.6 50 2 K.EFAGEDTSDLFLEER.E                                                                |
| gi 50301238 ref N | 3                        | 5      | 0.107  | 522     | 56257   | 8.5 U  | glutathione reductase [Homo sapiens]                                                            |
| *                 | HsGST-MOCK_Ti_302.349    | 3.2355 | 0.3051 | 2574.28 | 2574.78 | 9367.2 | 1 652.2 40.9 1 R.SFDSMISTNCTEELNAGVEVLK.F                                                       |
| *                 | HsFLAG-Control_MG_293_   | 3.4896 | 0.2904 | 1153.48 | 1153.41 | 5050.9 | 1 1294 90.9 2 K.ALLTPVAIAAGR.K                                                                  |
| *                 | HsGST-MOCK_Ti_403.282    | 4.0271 | 0.3228 | 2315.69 | 2316.53 | 5959.4 | 1 585.8 45 2 K.ADFDNTVAIHPTSSEELVTLR.-                                                          |
| gi 6005854 ref NF | 2                        | 3      | 0.107  | 299     | 33296   | 9.8 U  | prohibitin 2 [Homo sapiens]                                                                     |
| *                 | HsFLAG-Control_293_Ti_10 | 2.9523 | 0.3272 | 1724.55 | 1725.04 | 8437.1 | 4 476.7 50 1 R.IPWFQYPIIYDIR.A                                                                  |
| *                 | HsFLAG-Control_293_Ti_10 | 3.5051 | 0.3526 | 2227.97 | 2226.49 | 9925.7 | 1 449.2 38.9 2 R.IYLTADNLVNLQDESFR.G                                                            |
| gi 23503295 ref N | 1                        | 2      | 0.107  | 215     | 24942   | 5.6 U  | casein kinase 2, beta polypeptide [Homo sapiens]                                                |
| *                 | HsHeLa3_Ti_103.3422.342  | 3.497  | 0.2913 | 2563.71 | 2562.97 | 4788.6 | 1 499.1 45.5 2 R.VYCENQPMPLIGLSDIPGEAMVK.L                                                      |
| gi 40806162 ref N | 3                        | 4      | 0.106  | 461     | 52788   | 7.1 U  | thyroid hormone receptor, beta [Homo sapiens]                                                   |
| *                 | HsFLAG-MOCK_300mM_T      | 4.0243 | 0.2164 | 2250.48 | 2248.66 | 4131.5 | 1 625.9 58.8 2 K.KLPMFCELPCEDQIILLK.G                                                           |
| *                 | HsFLAG-MOCK_300mM_T      | 3.9912 | 0.3357 | 2424.26 | 2424.69 | 3066.4 | 2 342.7 47.6 1 R.AAVRYDPESETLTLNGEMAVTR.G                                                       |
|                   | HsFLAG-MOCK_300mM_T      | 2.6738 | 0.2103 | 1004.24 | 1003.13 | 3533.9 | 1 786.1 93.8 1 R.MIGACHASR.F                                                                    |
| gi 15055539 ref N | 2                        | 4      | 0.106  | 293     | 31324   | 10.2 U | ribosomal protein S2 [Homo sapiens]                                                             |
|                   | HsHeLa_Control-MG_Ti_20  | 3.6692 | 0.4069 | 2154.67 | 2154.47 | 6937.1 | 1 459.9 44.4 1 K.ESEIIDFFLGASLKDEVLK.I                                                          |
|                   | Hs293FLP_TREX_Ti_105.2   | 3.4138 | 0.1797 | 1466.25 | 1464.62 | 8412.7 | 1 927.3 68.2 3 K.SPYQEFTDHLVK.T                                                                 |
| gi 4504345 ref NF | 3                        | 10     | 0.106  | 142     | 15258   | 8.7 U  | alpha 2 globin [Homo sapiens]                                                                   |
| gi 4504347 ref NF | 3                        | 10     | 0.106  | 142     | 15258   | 8.7 U  | alpha 1 globin [Homo sapiens]                                                                   |
|                   | HsFLAG-MOCK_150mM_T      | 3.3017 | 0.1978 | 1530.32 | 1530.64 | 7524.9 | 1 1185.1 64.3 7 K.VGAHAGEYGAEALER.M                                                             |
|                   | HsGST-MOCK_Ti_404.184    | 2.9652 | 0.082  | 1530.53 | 1530.64 | 8670.6 | 1 1094.4 60.7 2 K.VGAHAGEYGAEALER.M                                                             |
|                   | HsGST-MOCK_Ti_101.072    | 3.6361 | 0.1261 | 1532.12 | 1530.64 | 8551.5 | 1 1862.9 50 1 K.VGAHAGEYGAEALER.M                                                               |
| gi 42476164 ref N | 4                        | 7      | 0.105  | 743     | 76472   | 6.8 U  | POU domain, class 2, transcription factor 1 [Homo sapiens]                                      |
| *                 | HsFLAG-Control_HeLa_NE   | 3.0907 | 0.2226 | 1883.61 | 1883.15 | 7464.4 | 3 490.6 44.1 2 R.TIAATPIQTL PQSQSTPK.R                                                          |
|                   | HsHeLa3_Ti_103.2220.222  | 3.7662 | 0.3966 | 1395.15 | 1394.63 | 5454   | 1 1009.5 73.1 2 K.LGFTQGDVGLAMGK.L                                                              |
| *                 | HsHeLa3_Ti_102.2975.297  | 3.0625 | 0.4101 | 3105.94 | 3105.3  | 5976.1 | 1 341.6 29.3 1 K.WLNDAENLSSDSSLSPSALNSPGIEGLSR.R                                                |
| *                 | HsHeLa3_Ti_106.1907.190  | 4.2148 | 0.4522 | 1586.76 | 1585.76 | 7118.6 | 1 1424.2 73.3 2 K.RINPPSSGGTSSSPIK.A                                                            |
| gi 4757810 ref NF | 4                        | 7      | 0.105  | 553     | 59751   | 9.1 U  | ATP synthase, H+ transporting, mitochondrial F1 complex, alpha subunit precursor [Homo sapiens] |
| gi 50345984 ref N | 4                        | 7      | 0.105  | 553     | 59751   | 9.1 U  | ATP synthase, H+ transporting, mitochondrial F1 complex, alpha subunit precursor [Homo sapiens] |

|                          |        |        |         |         |         |        |                                                                                                 |
|--------------------------|--------|--------|---------|---------|---------|--------|-------------------------------------------------------------------------------------------------|
| gi 50345982 ref N        | 4      | 7      | 0.115   | 503     | 54494   | 8.2 U  | ATP synthase, H+ transporting, mitochondrial F1 complex, alpha subunit isoform b [Homo sapiens] |
| HsFLAG-Control_MG_293_   | 3.59   | 0.2178 | 1317.68 | 1317.53 | 8740.2  | 2      | 1264 72.7 1 K.TSIAIDTIINQK.R                                                                    |
| Hs293FLP_TREX_Ti_106.2   | 3.1754 | 0.2634 | 1288.24 | 1288.49 | 7431.3  | 1      | 1570.8 90 2 K.HALIIYDDLK.Q                                                                      |
| HsFLAG-Control_293_Ti_2( | 2.8034 | 0.2668 | 1554.32 | 1554.7  | 5716    | 1      | 689 66.7 1 R.EAYPGDVVFLHSR.L                                                                    |
| HsFLAG-Control_293_Ti_2( | 5.2945 | 0.505  | 2339.23 | 2339.57 | 7680    | 1      | 1709 59.5 3 R.EVAFAQFGSDLDAATQQLSR.G                                                            |
| gi 4826686 ref NF        | 6      | 14     | 0.104   | 740     | 82432   | 7.2 U  | DEAD (Asp-Glu-Ala-Asp) box polypeptide 1 [Homo sapiens]                                         |
| HsHeLa3_Ti_104.2656.265( | 3.3356 | 0.3618 | 2139.08 | 2139.46 | 8378.7  | 1      | 710.8 47.2 2 K.ALIVEPSRELAEQTLNNIK.Q                                                            |
| HsHeLa3_Ti_103.4476.447( | 3.8987 | 0.2447 | 2373.13 | 2373.62 | 8466.3  | 1      | 1053.4 35 1 R.FLVLEADGLLSQGYSDFINR.M                                                            |
| HsHeLa_Control-MG_Ti_20  | 3.8098 | 0.2379 | 2374.59 | 2373.62 | 7057    | 1      | 735.5 47.5 1 R.FLVLEADGLLSQGYSDFINR.M                                                           |
| HsHeLa3_Ti_103.4470.447( | 5.6952 | 0.4996 | 2374.74 | 2373.62 | 7496.9  | 1      | 2080 67.5 8 R.FLVLEADGLLSQGYSDFINR.M                                                            |
| HsHeLa3_Ti_104.3015.301( | 3.7647 | 0.3309 | 2080.81 | 2080.39 | 3328.2  | 1      | 493.7 55.6 1 R.GIDIHGVPYVINVTLPDEK.Q                                                            |
| HsHeLa3_Ti_106.2808.281( | 4.8597 | 0.4674 | 2135.21 | 2135.43 | 5487.5  | 1      | 1119.2 61.8 1 K.EAQTSLHLGYLPLNQLFR.T                                                            |
| gi 6005802 ref NF        | 1      | 3      | 0.104   | 134     | 15097   | 7.1 U  | proline rich 4 (lacrimal) [Homo sapiens]                                                        |
| HsFLAG-Control_293_Ti_2( | 4.0174 | 0.4045 | 1602.8  | 1602.79 | 7361.4  | 1      | 1402.2 73.1 3 R.FPSVSLQEASSFFR.R                                                                |
| gi 61175258 ref N        | 1      | 3      | 0.104   | 125     | 14116   | 8.3 U  | hypothetical protein LOC388753 [Homo sapiens]                                                   |
| HsFLAG-MOCK_300mM_T      | 3.5485 | 0.3518 | 1584.27 | 1584.69 | 6294.5  | 1      | 741.7 62.5 3 R.SSFESSCPQQWIK.Y                                                                  |
| gi 50659095 ref N        | 6      | 9      | 0.103   | 783     | 87344   | 9.3 U  | DEAD (Asp-Glu-Ala-Asp) box polypeptide 21 [Homo sapiens]                                        |
| HsFLAG-Control_HeLa_NE   | 3.0186 | 0.1514 | 1712.78 | 1712.81 | 7077.7  | 1      | 1152.2 67.9 1 K.NEEPSEEEIDAPKPK.K                                                               |
| HsFLAG-Control_HeLa_NE   | 3.5754 | 0.2599 | 1669.63 | 1669.83 | 4427.2  | 1      | 858.2 71.4 2 K.EGAFSNFPISEETIK.L                                                                |
| HsFLAG-Control_HeLa_NE   | 3.1048 | 0.3125 | 1221.49 | 1221.49 | 4549.8  | 1      | 783.1 80 1 R.GVTFLFPIQAK.T                                                                      |
| HsFLAG-Control_HeLa_NE   | 4.0264 | 0.2829 | 1165.55 | 1165.42 | 7913.2  | 1      | 1609.6 80 3 R.APQVLVLAPTR.E                                                                     |
| HsFLAG-Control_HeLa_NE   | 2.9057 | 0.2191 | 2009.22 | 2010.18 | 6036.1  | 1      | 445.2 44.1 1 K.LSVACFYGGTPYGGQFER.M                                                             |
| HsGST-MOCK_Ti_305.200(   | 3.6705 | 0.336  | 1195.95 | 1196.43 | 5497.4  | 2      | 882.7 80 1 K.TAITVEHLAIK.C                                                                      |
| gi 40538736 ref N        | 3      | 5      | 0.103   | 620     | 67257   | 6.8 U  | RAN binding protein 10 [Homo sapiens]                                                           |
| HsHeLa_Control-MG_Ti_20  | 2.8666 | 0.2447 | 1939.44 | 1938.2  | 7390.7  | 1      | 634.5 53.1 1 R.ATHPIPAACGIYFVK.I                                                                |
| HsHeLa_Control-MG_Ti_20  | 3.7476 | 0.392  | 1475.25 | 1472.65 | 8032.9  | 1      | 891.9 66.7 2 K.VQGTVHCFPISAR.L                                                                  |
| HsHeLa_Control-MG_Ti_20  | 4.4535 | 0.3274 | 3351.72 | 3351.3  | 10770.3 | 1      | 985.2 23.5 2 K.YPAPSSSSSSSSSSSSPSSVNYSESNSTDSTK.S                                               |
| gi 45505149 ref N        | 2      | 2      | 0.103   | 428     | 47629   | 8.2 U  | nuclear factor I/C isoform 1 [Homo sapiens]                                                     |
| gi 45505151 ref N        | 2      | 2      | 0.088   | 499     | 54682   | 8.5 U  | nuclear factor I/C isoform 2 [Homo sapiens]                                                     |
| HsHeLa3_Ti_105.3106.310( | 3.0393 | 0.3258 | 1488.36 | 1488.69 | 6397.6  | 1      | 853.1 72.7 1 R.AFAYTWFNLQAR.K                                                                   |
| HsHeLa3_Ti_106.2770.277( | 4.0557 | 0.2858 | 3284.69 | 3284.65 | 5583    | 1      | 678.5 27.4 1 R.TPVVTGTGPNFSLGELQGHLAYDLNPASTGLR.R                                               |
| gi 14141193 ref N        | 2      | 4      | 0.103   | 194     | 22591   | 10.7 U | ribosomal protein S9 [Homo sapiens]                                                             |
| HsHeLa_Control-MG_Ti_20  | 3.7725 | 0.2026 | 1189.66 | 1189.4  | 5500.8  | 3      | 936.7 83.3 3 R.RLFEGNALLR.R                                                                     |
| HsHeLa_Control-MG_Ti_20  | 2.5899 | 0.1884 | 1003.8  | 1004.09 | 5968.7  | 3      | 630.3 72.2 1 R.SPYGGGRPGR.V                                                                     |
| gi 68508957 ref N        | 2      | 3      | 0.102   | 566     | 62393   | 6.6 U  | carboxylesterase 1 isoform c precursor [Homo sapiens]                                           |
| gi 68508967 ref N        | 2      | 3      | 0.102   | 568     | 62592   | 6.6 U  | carboxylesterase 1 isoform a precursor [Homo sapiens]                                           |
| gi 68508965 ref N        | 2      | 3      | 0.102   | 567     | 62521   | 6.6 U  | carboxylesterase 1 isoform b precursor [Homo sapiens]                                           |
| HsHeLa_Control-MG_Ti_20  | 5.6553 | 0.2625 | 3791.42 | 3792.24 | 11343.9 | 1      | 769.9 20.3 1 K.N                                                                                |
| HsHeLa_Control-MG_Ti_20  | 5.0858 | 0.4591 | 2151.57 | 2150.44 | 8052.2  | 1      | 1589.3 63.2 2 K.TVIGDHGDELFSVFGAPFLK.E                                                          |
| gi 32189394 ref N        | 4      | 4      | 0.102   | 529     | 56560   | 5.4 U  | ATP synthase, H+ transporting, mitochondrial F1 complex, beta subunit precursor [Homo sapiens]  |
| Hs293FLP_TREX_Ti_102.2   | 2.4944 | 0.1619 | 1088.38 | 1089.32 | 5472.3  | 1      | 602 72.2 1 K.VVDLLAPYAK.G                                                                       |
| HsFLAG-Control_MG_293_   | 1.947  | 0.1464 | 975.48  | 976.164 | 7656.4  | 4      | 796.2 70 1 K.IGLFGGAGVGK.T                                                                      |
| HsFLAG-Control_293_Ti_2( | 3.6924 | 0.3095 | 1436.36 | 1436.61 | 8831.5  | 1      | 1628 76.9 1 R.FTQAGSEVSALLGR.I                                                                  |
| HsHeLa_Control_Ti_102.30 | 2.9661 | 0.2161 | 1990.5  | 1989.23 | 3844.9  | 2      | 357 44.4 1 R.AIAELGIYPAVDPLDSTSR.I                                                              |
| gi 5031977 ref NF        | 2      | 3      | 0.102   | 491     | 55521   | 7.2 U  | pre-B-cell colony enhancing factor 1 isoform a [Homo sapiens]                                   |
| gi 89031848 ref X        | 2      | 3      | 0.1     | 499     | 56177   | 7.8 U  | PREDICTED: similar to Nicotinamide phosphoribosyltransferase (NAMPRase) (Namp) (                |
| gi 89030888 ref X        | 2      | 3      | 0.095   | 527     | 59154   | 8 U    | PREDICTED: similar to Nicotinamide phosphoribosyltransferase (NAMPRase) (Namp) (                |

|                    |                         |        |        |         |         |         |      |        |      |   |                                                                                                      |
|--------------------|-------------------------|--------|--------|---------|---------|---------|------|--------|------|---|------------------------------------------------------------------------------------------------------|
|                    | HsFLAG-Control_HeLa_S10 | 3.7378 | 0.2569 | 2235.52 | 2236.57 | 8713.6  | 1    | 628.2  | 42.5 | 1 | R.STQAPLIIRPDSGNPLDVLK.V                                                                             |
|                    | HsHeLa_Control-MG_Ti_20 | 6.6016 | 0.4987 | 3209.17 | 3209.54 | 9602.2  | 1    | 1443.8 | 30.4 | 2 | R.TPAGNFVTLEEGKGDLEEYQDILLHTVFK.N                                                                    |
| gi 4506649 ref NF  |                         | 6      | 11     | 0.102   | 403     | 46109   | 10.2 | U      |      |   | ribosomal protein L3 isoform a [Homo sapiens]                                                        |
| gi 76496472 ref NF |                         | 6      | 11     | 0.116   | 354     | 40152   | 10.2 | U      |      |   | ribosomal protein L3 isoform b [Homo sapiens]                                                        |
|                    | Hs293FLP_TREX_Ti_106.2  | 2.3195 | 0.2147 | 983.54  | 984.146 | 4112.9  | 4    | 418.9  | 81.2 | 1 | R.HGSLGFLPR.K                                                                                        |
|                    | Hs293FLP_TREX_Ti_106.2  | 3.322  | 0.3199 | 984.42  | 984.146 | 5846.2  | 1    | 1191.5 | 93.8 | 2 | R.HGSLGFLPR.K                                                                                        |
|                    | Hs293FLP_TREX_Ti_103.1  | 4.236  | 0.4254 | 1434.16 | 1436.53 | 8938    | 1    | 1867.9 | 81.8 | 2 | K.TVFAEHISDECK.R                                                                                     |
|                    | Hs293FLP_TREX_Ti_103.1  | 2.9559 | 0.1247 | 892.25  | 892.086 | 4286.8  | 1    | 829.5  | 92.9 | 2 | K.IGQQYLK.D                                                                                          |
|                    | Hs293FLP_TREX_Ti_102.1  | 3.205  | 0.3377 | 1342.31 | 1343.35 | 3790.1  | 1    | 292.5  | 59.1 | 2 | K.NNASTDYDLSDK.S                                                                                     |
|                    | Hs293FLP_TREX_Ti_102.1  | 3.8602 | 0.2146 | 1343.15 | 1343.35 | 6180.1  | 1    | 1059.2 | 77.3 | 2 | K.NNASTDYDLSDK.S                                                                                     |
| gi 50053872 ref NF |                         | 2      | 2      | 0.102   | 246     | 28661   | 10.5 | U      |      |   | ribosomal protein L7-like 1 [Homo sapiens]                                                           |
| *                  | HsGST-MOCK_Ti_104.168   | 2.9759 | 0.2343 | 1447.25 | 1446.61 | 4711.2  | 1    | 510.2  | 70   | 1 | K.RLESFLHDSWR.Q                                                                                      |
| *                  | HsGST-MOCK_Ti_105.152   | 3.4805 | 0.3773 | 1645.48 | 1645.94 | 6112.8  | 1    | 713.8  | 65.4 | 1 | R.RLEVKPHALELPDK.H                                                                                   |
| gi 21362060 ref NF |                         | 1      | 2      | 0.102   | 147     | 15015   | 7.8  | U      |      |   | hypothetical protein LOC84326 [Homo sapiens]                                                         |
| *                  | HsGST-MOCK_Ti_302.277   | 4.2119 | 0.2979 | 1759.18 | 1759.92 | 4269    | 1    | 1171.1 | 71.4 | 2 | R.AFPLAEWQPSVDVQR.C                                                                                  |
| gi 21237805 ref NF |                         | 9      | 14     | 0.101   | 1214    | 132879  | 5.7  | U      |      |   | SWI/SNF-related matrix-associated actin-dependent regulator of chromatin c2 isoform a [Homo sapiens] |
| gi 21237808 ref NF |                         | 9      | 14     | 0.109   | 1130    | 124841  | 5.6  | U      |      |   | SWI/SNF-related matrix-associated actin-dependent regulator of chromatin c2 isoform b [Homo sapiens] |
|                    | HsHeLa3_Ti_102.2101.210 | 3.1833 | 0.4706 | 1792.66 | 1792.9  | 4719.4  | 1    | 827.9  | 67.9 | 1 | K.YYEAADTVTQFDNVR.L                                                                                  |
|                    | HsHeLa3_Ti_103.1310.131 | 2.0753 | 0.1061 | 1160.63 | 1161.3  | 3370.7  | 1    | 331.5  | 72.2 | 1 | K.YIQAEPTNK.S                                                                                        |
|                    | HsHeLa3_Ti_106.3770.377 | 5.1666 | 0.334  | 2152.22 | 2152.5  | 7770.2  | 1    | 1778.3 | 66.7 | 3 | K.SLSSLVVQLLQFQEEVFGK.H                                                                              |
|                    | HsHeLa3_Ti_106.1751.175 | 1.9468 | 0.2579 | 966.58  | 967.113 | 4466.8  | 1    | 449.7  | 68.8 | 1 | K.HVSNAPLTK.L                                                                                        |
|                    | HsHeLa3_Ti_103.1911.191 | 2.5713 | 0.3068 | 1553.68 | 1553.68 | 3453.2  | 1    | 333    | 62.5 | 1 | R.LNPQEYLTSTACR.R                                                                                    |
|                    | HsHeLa3_Ti_104.2471.247 | 3.7585 | 0.261  | 1433.7  | 1432.59 | 6393.3  | 1    | 1149   | 80   | 1 | R.TQDECILHFLR.L                                                                                      |
|                    | HsHeLa3_Ti_103.1014.101 | 2.8107 | 0.2608 | 1347.53 | 1347.42 | 6864.1  | 1    | 651.8  | 66.7 | 2 | R.EGGGAIEEEAKEK.T                                                                                    |
|                    | HsFLAG-Control_HeLa_NE  | 4.5416 | 0.4429 | 1886.84 | 1886.11 | 8225.2  | 1    | 1305.3 | 55   | 2 | R.DIGEGNLSTAAAAALAAAVK.A                                                                             |
|                    | HsHeLa3_Ti_105.3182.318 | 3.4996 | 0.1814 | 1333.68 | 1332.64 | 6963.5  | 1    | 1092.7 | 72.7 | 2 | K.SLVALLVETQMK.K                                                                                     |
| gi 55741671 ref NF |                         | 7      | 7      | 0.101   | 1083    | 121837  | 6.5  | U      |      |   | hypothetical protein LOC22998 [Homo sapiens]                                                         |
| *                  | HsHeLa3_Ti_106.3310.331 | 2.6342 | 0.2379 | 2366.7  | 2366.81 | 7186.2  | 1    | 495.5  | 35.7 | 1 | R.TGLENGILLCELLNAIKPGLVK.K                                                                           |
| *                  | HsHeLa3_Ti_106.3315.331 | 4.2575 | 0.3902 | 2369.15 | 2366.81 | 6518.4  | 1    | 858.5  | 33.3 | 1 | R.TGLENGILLCELLNAIKPGLVK.K                                                                           |
| *                  | HsHeLa3_Ti_104.2505.250 | 3.0686 | 0.2554 | 2117.05 | 2116.31 | 7205.9  | 1    | 606.4  | 50   | 1 | R.SHSTEPNLSSFLNDPNPMK.Y                                                                              |
| *                  | HsHeLa3_Ti_105.1551.155 | 2.7276 | 0.3386 | 1614.07 | 1613.81 | 3662.2  | 1    | 370    | 57.1 | 1 | K.KPNVSPQELAAATTEK.T                                                                                 |
| *                  | HsHeLa3_Ti_104.1765.176 | 4.0862 | 0.4417 | 2088.93 | 2089.27 | 4464.6  | 1    | 639.2  | 55.6 | 1 | K.GNIELASSEPHFTTTVTR.C                                                                               |
| *                  | HsHeLa3_Ti_104.2677.267 | 3.2932 | 0.4721 | 1894.87 | 1895.13 | 7462    | 1    | 759.7  | 53.1 | 1 | R.CSPTVAFVEFPSSPQLK.N                                                                                |
| *                  | HsHeLa3_Ti_105.1524.152 | 3.9384 | 0.4273 | 1626.82 | 1625.78 | 6598.2  | 1    | 945    | 59.4 | 1 | K.GSLTEGALAHSGNPVSK.G                                                                                |
| gi 4503519 ref NF  |                         | 3      | 9      | 0.101   | 357     | 37564   | 5.4  | U      |      |   | eukaryotic translation initiation factor 3, subunit 5 epsilon, 47kDa [Homo sapiens]                  |
| *                  | HsFLAG-Control_HeLa_NE  | 4.9136 | 0.477  | 1658.95 | 1658.85 | 10183.2 | 1    | 2197.5 | 68.8 | 2 | R.VIGLSSDLQVGGASAR.I                                                                                 |
|                    | HsFLAG-Control_HeLa_NE  | 3.67   | 0.3155 | 2052.44 | 2051.3  | 11247.3 | 1    | 1369.2 | 36.1 | 1 | R.IQDALSTVLQYAEVLSGK.V                                                                               |
|                    | HsFLAG-Control_HeLa_NE  | 5.9137 | 0.4821 | 2052.76 | 2051.3  | 5460.1  | 1    | 1351.8 | 69.4 | 6 | R.IQDALSTVLQYAEVLSGK.V                                                                               |
| gi 20149592 ref NF |                         | 2      | 4      | 0.1     | 350     | 38452   | 5.1  | U      |      |   | serine/threonine kinase receptor associated protein [Homo sapiens]                                   |
| *                  | HsFLAG-Control_HeLa_NE  | 4.2539 | 0.3899 | 2004.66 | 2003.13 | 10655.7 | 1    | 1229   | 52.9 | 1 | K.TVDFTQDSNYLLTGGQDK.L                                                                               |
|                    | Hs293FLP_TREX_Ti_104.1  | 3.3001 | 0.3785 | 1798.72 | 1799.98 | 5338    | 1    | 565    | 53.1 | 3 | K.SFEAPATINSASLHPEK.E                                                                                |
| gi 56549119 ref NF |                         | 5      | 6      | 0.099   | 866     | 97652   | 7.6  | U      |      |   | dynamain 2 isoform 3 [Homo sapiens]                                                                  |
| gi 56549121 ref NF |                         | 5      | 6      | 0.099   | 870     | 98064   | 7.5  | U      |      |   | dynamain 2 isoform 1 [Homo sapiens]                                                                  |
|                    | HsFLAG-Control_HeLa_NE  | 4.5386 | 0.3037 | 2985.18 | 2985.29 | 10809.7 | 1    | 1241.8 | 26.8 | 1 | K.LQDAFSSIGQSCHLDLPQIAVVGGSAGK.S                                                                     |
|                    | HsFLAG-Control_HeLa_NE  | 3.9422 | 0.4425 | 2093.86 | 2094.5  | 7982.5  | 1    | 1211.1 | 55.6 | 1 | R.VYSPHVLNLTLDLPGITK.V                                                                               |
|                    | HsFLAG-MOCK_300mM_T     | 2.6045 | 0.2686 | 1338.12 | 1338.51 | 7841.8  | 8    | 493.4  | 55   | 1 | K.TLNQQLTNHIR.E                                                                                      |
|                    | HsFLAG-Control_HeLa_NE  | 3.6789 | 0.3978 | 1622.48 | 1622.9  | 4048.4  | 1    | 657.7  | 67.9 | 2 | R.TGLFTPDLAFAIVK.K                                                                                   |
|                    | HsFLAG-Control_HeLa_NE  | 4.4893 | 0.2918 | 1349.35 | 1349.57 | 6618.3  | 1    | 1459   | 81.8 | 1 | R.NLVDSYVAIINK.S                                                                                     |
| gi 18201905 ref NF |                         | 4      | 7      | 0.099   | 558     | 63147   | 8.3  | U      |      |   | glucose phosphate isomerase [Homo sapiens]                                                           |

|                    |                          |        |        |         |         |         |   |        |      |    |                                                                                                    |
|--------------------|--------------------------|--------|--------|---------|---------|---------|---|--------|------|----|----------------------------------------------------------------------------------------------------|
| *                  | Hs293FLP_TREX_Ti_105.2   | 4.162  | 0.3554 | 1603.35 | 1603.82 | 6138    | 1 | 1023.7 | 69.2 | 3  | R.VWYVSNIDGTHIAK.T                                                                                 |
| *                  | Hs293FLP_TREX_Ti_105.1   | 2.8339 | 0.179  | 1219.45 | 1219.38 | 4150.4  | 1 | 832.6  | 80   | 1  | K.HFVALSTNTTK.V                                                                                    |
| *                  | HsHeLa3_Ti_105.4384.438  | 2.8672 | 0.3245 | 1704.81 | 1705.07 | 6651.6  | 1 | 771.2  | 57.1 | 1  | K.ILLANFLAQTEALMR.G                                                                                |
| *                  | Hs293FLP_TREX_Ti_105.1   | 3.4316 | 0.2472 | 1710.03 | 1709.94 | 5756    | 2 | 723.7  | 60.7 | 2  | K.VFEGNRPTNSIVFTK.L                                                                                |
| gi 6912478 ref NF  |                          | 3      | 9      | 0.099   | 536     | 60030   |   |        |      |    | karyopherin alpha 6 [Homo sapiens]                                                                 |
| *                  | HsFLAG-Control_HeLa_S1(  | 5.0836 | 0.4385 | 2091.18 | 2091.46 | 8310.2  | 1 | 1197.8 | 58.8 | 4  | R.DYVLNCSILNPLLLTLTK.S                                                                             |
|                    | HsFLAG-Control_HeLa_S1(  | 2.9294 | 0.2836 | 2340.3  | 2337.81 | 8146.2  | 1 | 578.2  | 40   | 1  | R.AQIQAVIDANIFFVLLIEILQK.A                                                                         |
|                    | Hs293FLP-MG_Ti_306.280   | 5.0537 | 0.1983 | 1555.66 | 1552.86 | 10035.6 | 1 | 2847.9 | 84.6 | 4  | K.IVQVALNGLENILR.L                                                                                 |
| gi 88951232 ref X  |                          | 5      | 21     | 0.099   | 262     | 28060   |   |        |      |    | PREDICTED: similar to eukaryotic translation elongation factor 1 alpha 1 isoform 27 [Homo sapiens] |
| gi 88951276 ref X  |                          | 5      | 21     | 0.099   | 262     | 28060   |   |        |      |    | PREDICTED: similar to eukaryotic translation elongation factor 1 alpha 1 isoform 50 [Homo sapiens] |
| gi 88951274 ref X  |                          | 5      | 21     | 0.099   | 262     | 28060   |   |        |      |    | PREDICTED: similar to eukaryotic translation elongation factor 1 alpha 1 isoform 49 [Homo sapiens] |
| gi 88951270 ref X  |                          | 5      | 21     | 0.099   | 262     | 28060   |   |        |      |    | PREDICTED: similar to eukaryotic translation elongation factor 1 alpha 1 isoform 47 [Homo sapiens] |
| gi 88951268 ref X  |                          | 5      | 21     | 0.134   | 194     | 20771   |   |        |      |    | PREDICTED: similar to eukaryotic translation elongation factor 1 alpha 1 isoform 46 [Homo sapiens] |
| gi 88951266 ref X  |                          | 5      | 21     | 0.099   | 262     | 28060   |   |        |      |    | PREDICTED: similar to eukaryotic translation elongation factor 1 alpha 1 isoform 45 [Homo sapiens] |
| gi 88951264 ref X  |                          | 5      | 21     | 0.099   | 262     | 28060   |   |        |      |    | PREDICTED: similar to eukaryotic translation elongation factor 1 alpha 1 isoform 44 [Homo sapiens] |
| gi 88951262 ref X  |                          | 5      | 21     | 0.099   | 262     | 28060   |   |        |      |    | PREDICTED: similar to eukaryotic translation elongation factor 1 alpha 1 isoform 43 [Homo sapiens] |
| gi 88951258 ref X  |                          | 5      | 21     | 0.099   | 262     | 28060   |   |        |      |    | PREDICTED: similar to eukaryotic translation elongation factor 1 alpha 1 isoform 41 [Homo sapiens] |
| gi 88951252 ref X  |                          | 5      | 21     | 0.099   | 262     | 28060   |   |        |      |    | PREDICTED: similar to eukaryotic translation elongation factor 1 alpha 1 isoform 38 [Homo sapiens] |
| gi 88951250 ref X  |                          | 5      | 21     | 0.099   | 262     | 28060   |   |        |      |    | PREDICTED: similar to eukaryotic translation elongation factor 1 alpha 1 isoform 37 [Homo sapiens] |
| gi 88951248 ref X  |                          | 5      | 21     | 0.099   | 262     | 28060   |   |        |      |    | PREDICTED: similar to eukaryotic translation elongation factor 1 alpha 1 isoform 36 [Homo sapiens] |
| gi 88951244 ref X  |                          | 5      | 21     | 0.099   | 262     | 28060   |   |        |      |    | PREDICTED: similar to eukaryotic translation elongation factor 1 alpha 1 isoform 34 [Homo sapiens] |
| gi 88951242 ref X  |                          | 5      | 21     | 0.099   | 262     | 28060   |   |        |      |    | PREDICTED: similar to eukaryotic translation elongation factor 1 alpha 1 isoform 33 [Homo sapiens] |
| gi 88951240 ref X  |                          | 5      | 21     | 0.099   | 262     | 28060   |   |        |      |    | PREDICTED: similar to eukaryotic translation elongation factor 1 alpha 1 isoform 32 [Homo sapiens] |
| gi 88951238 ref X  |                          | 5      | 21     | 0.099   | 262     | 28060   |   |        |      |    | PREDICTED: similar to eukaryotic translation elongation factor 1 alpha 1 isoform 31 [Homo sapiens] |
| gi 88951234 ref X  |                          | 5      | 21     | 0.099   | 262     | 28060   |   |        |      |    | PREDICTED: similar to eukaryotic translation elongation factor 1 alpha 1 isoform 29 [Homo sapiens] |
|                    | Hs293FLP_Ti_306.2670.26  | 3.2917 | 0.2924 | 1342.8  | 1342.62 | 4781.3  | 1 | 708    | 75   | 11 | K.PLRLPLQDVYK.I                                                                                    |
|                    | HsHeLa_Control_Ti_106.31 | 3.1476 | 0.2914 | 1342.85 | 1342.62 | 5204.3  | 1 | 841.7  | 75   | 4  | K.PLRLPLQDVYK.I                                                                                    |
|                    | HsHeLa3_Ti_106.2360.236  | 4.1661 | 0.2161 | 1343.33 | 1342.62 | 6881.1  | 1 | 1536.8 | 60   | 2  | K.PLRLPLQDVYK.I                                                                                    |
|                    | HsGST-MOCK_Ti_102.184    | 4.1506 | 0.2292 | 1343.6  | 1342.62 | 6531.1  | 1 | 1475   | 57.5 | 2  | K.PLRLPLQDVYK.I                                                                                    |
|                    | HsHeLa3_Ti_103.2430.243  | 3.7938 | 0.4396 | 1755.9  | 1755.95 | 7187.6  | 1 | 1037.6 | 57.1 | 2  | K.PMCVESFSYDYPPLGR.F                                                                               |
| gi 37544743 ref X  |                          | 1      | 3      | 0.099   | 101     | 11741   |   |        |      |    | PREDICTED: similar to 60S ribosomal protein L35 [Homo sapiens]                                     |
| gi 89057079 ref X  |                          | 1      | 3      | 0.074   | 136     | 15556   |   |        |      |    | PREDICTED: similar to 60S ribosomal protein L35 [Homo sapiens]                                     |
| gi 89050566 ref X  |                          | 1      | 3      | 0.074   | 136     | 15556   |   |        |      |    | PREDICTED: similar to 60S ribosomal protein L35 [Homo sapiens]                                     |
| gi 89037172 ref X  |                          | 1      | 3      | 0.099   | 101     | 11741   |   |        |      |    | PREDICTED: similar to 60S ribosomal protein L35 [Homo sapiens]                                     |
| gi 6005860 ref NF  |                          | 1      | 3      | 0.081   | 123     | 14551   |   |        |      |    | ribosomal protein L35 [Homo sapiens]                                                               |
|                    | Hs293FLP_TREX_Ti_103.1   | 3.0717 | 0.1459 | 1144.44 | 1144.36 | 7306    | 1 | 1149.6 | 83.3 | 3  | R.VLTVINQQTQK.E                                                                                    |
| gi 7661744 ref NF  |                          | 2      | 11     | 0.098   | 419     | 48162   |   |        |      |    | basic leucine zipper and W2 domains 2 [Homo sapiens]                                               |
| *                  | HsFLAG-Control_HeLa_NE   | 5.7814 | 0.484  | 1960.15 | 1959.12 | 7956    | 1 | 2839.8 | 77.8 | 10 | R.DTLVQGLNEAGDDLEAVAK.F                                                                            |
| *                  | HsFLAG-Control_HeLa_S1(  | 2.6974 | 0.2002 | 2434.31 | 2434.84 | 11354.7 | 1 | 635.7  | 38.1 | 1  | K.QYAPLLAVFSSQGGSELILLQK.V                                                                         |
| gi 4557497 ref NF  |                          | 2      | 3      | 0.098   | 440     | 47535   |   |        |      |    | C-terminal binding protein 1 isoform 1 [Homo sapiens]                                              |
| gi 61743967 ref NF |                          | 2      | 3      | 0.1     | 429     | 46405   |   |        |      |    | C-terminal binding protein 1 isoform 2 [Homo sapiens]                                              |
|                    | Hs293FLP-MG_Ti_203.516   | 3.8546 | 0.2794 | 3517.25 | 3518.84 | 6015.1  | 1 | 429.9  | 22.7 | 2  | K.SAGDLGIACNVPAASVEETADSTLCHILNLYR.R                                                               |
|                    | HsFLAG-MOCK_300mM_T      | 3.0572 | 0.0847 | 1057.75 | 1057.24 | 7465.3  | 1 | 1550.7 | 88.9 | 1  | K.ALAQALKEGR.I                                                                                     |
| gi 5730023 ref NF  |                          | 4      | 8      | 0.097   | 463     | 51157   |   |        |      |    | RuvB-like 2 [Homo sapiens]                                                                         |
| *                  | HsHeLa3_Ti_104.1464.146  | 2.6336 | 0.3445 | 1111.62 | 1112.32 | 5785.7  | 1 | 485.3  | 59.1 | 2  | R.AVLIAGQPQTGK.T                                                                                   |
| *                  | HsHeLa3_Ti_104.1461.146  | 3.7679 | 0.2357 | 1112.52 | 1112.32 | 4927.6  | 2 | 852.9  | 72.7 | 3  | R.AVLIAGQPQTGK.T                                                                                   |
| *                  | HsFLAG-Control_HeLa_S1(  | 2.9598 | 0.3216 | 1684.25 | 1684.89 | 8236.7  | 1 | 1138.7 | 63.3 | 1  | R.TQGFLALFSGDTGEIK.S                                                                               |
| *                  | HsHeLa3_Ti_105.2384.238  | 3.2062 | 0.4093 | 1871.07 | 1870.07 | 4656.5  | 1 | 648.5  | 56.2 | 2  | R.GTSYQSPHGIPIDLLDR.L                                                                              |
| gi 24308093 ref NF |                          | 3      | 6      | 0.097   | 463     | 50526   |   |        |      |    | hypothetical protein LOC26065 [Homo sapiens]                                                       |

|                   |                          |        |        |         |         |         |   |        |      |   |                                                                       |
|-------------------|--------------------------|--------|--------|---------|---------|---------|---|--------|------|---|-----------------------------------------------------------------------|
| *                 | HsFLAG-Control_293_Ti_20 | 4.5575 | 0.4344 | 2101.86 | 2102.35 | 7439.5  | 1 | 787.5  | 50   | 2 | R.YEGILYIDTENSTVALAK.V                                                |
| *                 | HsFLAG-Control_MG_293_   | 3.8295 | 0.3189 | 1455.59 | 1455.65 | 8263.2  | 1 | 1009.9 | 65.4 | 1 | R.SPVSTRPLPSASQK.A                                                    |
| *                 | HsFLAG-Control_MG_293_   | 3.4417 | 0.413  | 1489.84 | 1490.49 | 5615.3  | 1 | 706.5  | 72.7 | 3 | K.SFFDNISCCDNR.E                                                      |
| gi 22202633 ref N |                          | 1      | 2      | 0.097   | 154     | 17328   |   |        |      |   | prefoldin 5 isoform alpha [Homo sapiens]                              |
| gi 22202637 ref N |                          | 1      | 2      | 0.138   | 109     | 12379   |   |        |      |   | prefoldin 5 isoform gamma [Homo sapiens]                              |
|                   | HsFLAG-Control_HeLa_S10  | 3.7727 | 0.3779 | 1484.96 | 1485.72 | 10459   | 1 | 957.7  | 57.1 | 2 | K.IQQLTALGAAQATAK.A                                                   |
| gi 21327701 ref N |                          | 3      | 11     | 0.096   | 592     | 61830   |   |        |      |   | TBP-associated factor 15 isoform 1 [Homo sapiens]                     |
| gi 4507353 ref NF |                          | 3      | 11     | 0.097   | 589     | 61558   |   |        |      |   | TBP-associated factor 15 isoform 2 [Homo sapiens]                     |
|                   | HsFLAG-Control_HeLa_NE   | 4.602  | 0.3782 | 3624.43 | 3624.72 | 9071.2  | 1 | 704.3  | 22.7 | 4 | R.TDADSESDNSDNTTIFVQGLGEGVSTDQVGEFFK.Q                                |
|                   | HsFLAG-Control_HeLa_S10  | 3.1093 | 0.3568 | 1420.76 | 1421.5  | 8011.9  | 1 | 1098.8 | 65.4 | 3 | K.GEATVSFDDPPSAK.A                                                    |
|                   | HsFLAG-Control_HeLa_NE   | 2.937  | 0.2157 | 1023.19 | 1023.13 | 5824.6  | 1 | 1015.2 | 87.5 | 4 | K.AAIDWFDGK.E                                                         |
| gi 56676330 ref N |                          | 3      | 4      | 0.096   | 553     | 61207   |   |        |      |   | HP1-BP74 [Homo sapiens]                                               |
| *                 | HsHeLa3_Ti_106.2579.257  | 4.8978 | 0.4184 | 1559.85 | 1559.89 | 6267.8  | 1 | 1522   | 78.6 | 2 | K.ALPLIVGAQLIHADK.L                                                   |
| *                 | HsHeLa3_Ti_104.2687.268  | 3.182  | 0.4533 | 1604.7  | 1602.83 | 3818.5  | 1 | 491.3  | 64.3 | 1 | K.TIPSWATLSASQLAR.A                                                   |
| *                 | HsHeLa3_Ti_106.3828.383  | 3.8208 | 0.1724 | 2392.12 | 2390.86 | 11401.8 | 2 | 1096.1 | 31.8 | 1 | K.PLLGGSLMEYAILSIAAMNEPK.T                                            |
| gi 4885073 ref NF |                          | 1      | 2      | 0.096   | 271     | 29233   |   |        |      |   | activating transcription factor 1 [Homo sapiens]                      |
| *                 | HsHeLa3_Ti_103.2583.258  | 4.0143 | 0.4203 | 2679.64 | 2679.06 | 4767    | 1 | 453    | 40   | 2 | R.TTPSATSLPQTVVMTSPVTLTSSQTTK.T                                       |
| gi 4505117 ref NF |                          | 1      | 2      | 0.095   | 411     | 43255   |   |        |      |   | methyl-CpG binding domain protein 2 isoform 1 [Homo sapiens]          |
|                   |                          |        |        |         |         |         |   |        |      |   | K.GLQGVGPGSNDETLLSAVASALHTSSAPITGQVSAAV                               |
| *                 | HsHeLa3_Ti_104.4020.402  | 4.4745 | 0.3293 | 3723.27 | 3722.1  | 4985.5  | 1 | 470.4  | 21.1 | 2 | EK.N                                                                  |
| gi 11321601 ref N |                          | 4      | 7      | 0.094   | 784     | 85596   |   |        |      |   | phosphofructokinase, platelet [Homo sapiens]                          |
| *                 | HsFLAG-Control_HeLa_S10  | 3.9443 | 0.373  | 2119.78 | 2120.33 | 8282.2  | 1 | 803.6  | 45   | 2 | K.EIGWTDVGGWTGQGGGILGTK.R                                             |
| *                 | Hs293FLP-MG_Ti_202.386   | 3.5387 | 0.2824 | 2677.58 | 2678.75 | 9303.7  | 1 | 917.5  | 42.9 | 3 | R.NESCSNYTTDFIYQLYSEEK.G                                              |
| *                 | HsFLAG-Control_HeLa_S10  | 3.4535 | 0.2031 | 1414.92 | 1414.69 | 7277.5  | 1 | 935.7  | 68.2 | 1 | K.RNVIFQPVAELK.K                                                      |
| *                 | HsFLAG-Control_HeLa_S10  | 4.1065 | 0.3746 | 2104.67 | 2105.23 | 4337.9  | 1 | 689.3  | 58.3 | 1 | K.ASYDVSDSGQLEHVQPWSV.-                                               |
| gi 51093863 ref N |                          | 4      | 7      | 0.094   | 746     | 84138   |   |        |      |   | hypothetical protein LOC64855 [Homo sapiens]                          |
| *                 | HsFLAG-Control_HeLa_S10  | 3.3622 | 0.2413 | 1750.67 | 1749.92 | 7879.5  | 1 | 940.3  | 60.7 | 2 | R.IVFSGNLFGHQEDSK.K                                                   |
| *                 | HsFLAG-Control_HeLa_NE   | 4.1383 | 0.1429 | 2334.54 | 2334.67 | 6563.4  | 7 | 503.4  | 38.1 | 2 | K.ILTSVDQYLELIGNSLPGTTAK.S                                            |
| *                 | HsFLAG-Control_HeLa_S10  | 3.5187 | 0.1431 | 1485.84 | 1485.85 | 6768.5  | 7 | 694.6  | 58.3 | 1 | R.EALLQISIPFLK.K                                                      |
| *                 | HsFLAG-Control_HeLa_S10  | 3.3144 | 0.3531 | 1968.61 | 1969.25 | 7533.5  | 1 | 575    | 44.7 | 2 | K.AAPEASSPPASPLQHLLPGK.A                                              |
| gi 28557709 ref N |                          | 2      | 5      | 0.094   | 318     | 34839   |   |        |      |   | phosphoribosyl pyrophosphate synthetase 1-like 1 [Homo sapiens]       |
| gi 4506127 ref NF |                          | 2      | 5      | 0.094   | 318     | 34834   |   |        |      |   | phosphoribosyl pyrophosphate synthetase 1 [Homo sapiens]              |
|                   | HsHeLa_Control-MG_Ti_10  | 3.5118 | 0.206  | 1435.57 | 1434.55 | 8101.5  | 7 | 1235.4 | 70.8 | 1 | K.IFSGSSHQDLSQK.I                                                     |
|                   | HsHeLa_Control-MG_Ti_10  | 4.617  | 0.2185 | 1803.17 | 1803.11 | 6525    | 1 | 1667.7 | 75   | 4 | R.VYAILTHGIFSGPAISR.I                                                 |
| gi 41149143 ref X |                          | 3      | 6      | 0.094   | 203     | 23619   |   |        |      |   | PREDICTED: similar to ribosomal protein L13a isoform 1 [Homo sapiens] |
| gi 89037072 ref X |                          | 3      | 6      | 0.107   | 178     | 20680   |   |        |      |   | PREDICTED: similar to ribosomal protein L13a isoform 3 [Homo sapiens] |
| gi 89037070 ref X |                          | 3      | 6      | 0.094   | 203     | 23443   |   |        |      |   | PREDICTED: similar to ribosomal protein L13a isoform 1 [Homo sapiens] |
| gi 89037068 ref X |                          | 3      | 6      | 0.105   | 181     | 21017   |   |        |      |   | PREDICTED: similar to ribosomal protein L13a isoform 2 [Homo sapiens] |
| gi 89035384 ref X |                          | 3      | 6      | 0.094   | 203     | 23299   |   |        |      |   | PREDICTED: similar to ribosomal protein L13a isoform 7 [Homo sapiens] |
| gi 89035382 ref X |                          | 3      | 6      | 0.094   | 203     | 23299   |   |        |      |   | PREDICTED: similar to ribosomal protein L13a isoform 6 [Homo sapiens] |
| gi 89035380 ref X |                          | 3      | 6      | 0.094   | 203     | 23299   |   |        |      |   | PREDICTED: similar to ribosomal protein L13a isoform 5 [Homo sapiens] |
| gi 89035378 ref X |                          | 3      | 6      | 0.111   | 171     | 20142   |   |        |      |   | PREDICTED: similar to ribosomal protein L13a isoform 4 [Homo sapiens] |
| gi 89035375 ref X |                          | 3      | 6      | 0.105   | 181     | 20847   |   |        |      |   | PREDICTED: similar to ribosomal protein L13a isoform 3 [Homo sapiens] |
| gi 89035373 ref X |                          | 3      | 6      | 0.221   | 86      | 10191   |   |        |      |   | PREDICTED: similar to ribosomal protein L13a isoform 2 [Homo sapiens] |
| gi 89033544 ref X |                          | 3      | 6      | 0.134   | 142     | 16773   |   |        |      |   | PREDICTED: similar to ribosomal protein L13a isoform 3 [Homo sapiens] |
| gi 89033542 ref X |                          | 3      | 6      | 0.105   | 181     | 21167   |   |        |      |   | PREDICTED: similar to ribosomal protein L13a isoform 2 [Homo sapiens] |
| gi 89033540 ref X |                          | 3      | 6      | 0.094   | 203     | 23619   |   |        |      |   | PREDICTED: similar to ribosomal protein L13a isoform 1 [Homo sapiens] |
| gi 89031570 ref X |                          | 3      | 6      | 0.094   | 203     | 23619   |   |        |      |   | PREDICTED: similar to ribosomal protein L13a isoform 5 [Homo sapiens] |

|                           |        |    |        |         |         |         |                                                                       |
|---------------------------|--------|----|--------|---------|---------|---------|-----------------------------------------------------------------------|
| gi 89031568 ref X         | 3      | 6  | 0.134  | 142     | 16773   | 10.8 U  | PREDICTED: similar to ribosomal protein L13a isoform 4 [Homo sapiens] |
| gi 89031566 ref X         | 3      | 6  | 0.107  | 178     | 20803   | 10.9 U  | PREDICTED: similar to ribosomal protein L13a isoform 3 [Homo sapiens] |
| gi 89031563 ref X         | 3      | 6  | 0.105  | 181     | 21167   | 11.1 U  | PREDICTED: similar to ribosomal protein L13a isoform 2 [Homo sapiens] |
| gi 6912634 ref NF         | 3      | 6  | 0.094  | 203     | 23577   | 10.9 U  | ribosomal protein L13a [Homo sapiens]                                 |
| gi 41202038 ref X         | 3      | 6  | 0.094  | 203     | 23299   | 10.3 U  | PREDICTED: similar to ribosomal protein L13a isoform 1 [Homo sapiens] |
| Hs293FLP_TREX_Ti_104.1    | 2.0082 |    | 0.187  | 939.32  | 940.09  | 3739.2  | 3 444.9 71.4 2 R.LAHEVGWK.Y                                           |
| Hs293FLP_TREX_Ti_102.1    | 2.8214 |    | 0.2948 | 1252.35 | 1253.4  | 8080.1  | 1 709.3 65 2 K.YQAVTATLEEK.R                                          |
| Hs293FLP_TREX_Ti_103.1    | 3.1521 |    | 0.3144 | 1254.43 | 1253.4  | 3965.1  | 1 1007.4 90 2 K.YQAVTATLEEK.R                                         |
| gi 18104948 ref N         | 1      | 6  | 0.094  | 160     | 18565   | 10.5 U  | ribosomal protein L21 [Homo sapiens]                                  |
| gi 89057392 ref X         | 1      | 6  | 0.094  | 160     | 18592   | 10.2 U  | PREDICTED: similar to ribosomal protein L21 isoform 1 [Homo sapiens]  |
| gi 89042532 ref X         | 1      | 6  | 0.128  | 117     | 13398   | 10.1 U  | PREDICTED: similar to ribosomal protein L21 isoform 1 [Homo sapiens]  |
| gi 89040203 ref X         | 1      | 6  | 0.094  | 160     | 18593   | 10.5 U  | PREDICTED: similar to ribosomal protein L21 isoform 1 [Homo sapiens]  |
| gi 89034571 ref X         | 1      | 6  | 0.094  | 160     | 18521   | 10.5 U  | PREDICTED: similar to 60S ribosomal protein L21 [Homo sapiens]        |
| gi 89031623 ref X         | 1      | 6  | 0.094  | 160     | 18565   | 10.5 U  | PREDICTED: similar to ribosomal protein L21 isoform 1 [Homo sapiens]  |
| gi 89026818 ref X         | 1      | 6  | 0.094  | 160     | 18595   | 10.5 U  | PREDICTED: similar to 60S ribosomal protein L21 [Homo sapiens]        |
| gi 89025818 ref X         | 1      | 6  | 0.094  | 160     | 18595   | 10.5 U  | PREDICTED: similar to 60S ribosomal protein L21 [Homo sapiens]        |
| gi 88952736 ref X         | 1      | 6  | 0.094  | 160     | 18535   | 10.5 U  | PREDICTED: similar to 60S ribosomal protein L21 [Homo sapiens]        |
| gi 88943726 ref X         | 1      | 6  | 0.094  | 160     | 18535   | 10.5 U  | PREDICTED: similar to 60S ribosomal protein L21 [Homo sapiens]        |
| gi 51466076 ref X         | 1      | 6  | 0.094  | 160     | 18595   | 10.5 U  | PREDICTED: similar to 60S ribosomal protein L21 [Homo sapiens]        |
| gi 41200850 ref X         | 1      | 6  | 0.094  | 160     | 18521   | 10.5 U  | PREDICTED: similar to 60S ribosomal protein L21 [Homo sapiens]        |
| gi 41150972 ref X         | 1      | 6  | 0.094  | 160     | 18592   | 10.2 U  | PREDICTED: similar to ribosomal protein L21 isoform 1 [Homo sapiens]  |
| Hs293FLP_TREX_Ti_106.2    | 5.4706 |    | 0.3631 | 1641.57 | 1641.91 | 7689.9  | 1 2235.5 78.6 6 R.VYNVTQHAVGIVV/NK.Q                                  |
| gi 42542379 ref N         | 5      | 9  | 0.093  | 904     | 102335  | 11.8 U  | serine/arginine repetitive matrix 1 [Homo sapiens]                    |
| * Hs293FLP-MG_Ti_205.265  | 3.3765 |    | 0.1373 | 1439.77 | 1440.77 | 8182.1  | 3 1082.6 72.7 2 K.VNLEVIKPWITK.R                                      |
| * Hs293FLP-MG_Ti_202.213  | 2.9095 |    | 0.338  | 1605.7  | 1605.74 | 6940.6  | 2 544.7 50 1 K.EPSVQEATSTSDILK.V                                      |
| * Hs293FLP_Ti_306.1975.19 | 3.2735 |    | 0.3247 | 1223.53 | 1222.39 | 5825.4  | 3 628.1 70 3 K.RESPSPAPKPR.K                                          |
| * HsHeLa_Control-MG_Ti_20 | 3.2833 |    | 0.3081 | 1224.72 | 1224.36 | 5423.6  | 1 680.8 72.7 2 R.APQTSSSPPPVR.R                                       |
| * Hs293FLP-MG_Ti_202.407  | 4.0261 |    | 0.1468 | 3117.34 | 3116.54 | 6980.9  | 1 860.4 25.8 1 K.AVAAAAAAVTPAAIAAATTTLAQEEPVAAPEPK.K                  |
| gi 4508047 ref NF         | 4      | 6  | 0.093  | 572     | 61277   | 6.7 U   | zyxin [Homo sapiens]                                                  |
| gi 58530845 ref N         | 4      | 6  | 0.093  | 572     | 61277   | 6.7 U   | zyxin [Homo sapiens]                                                  |
| HsHeLa3_Ti_105.1100.110   | 2.1549 |    | 0.3396 | 1076.74 | 1077.23 | 6559.5  | 5 397.8 50 1 R.GPPASSPAPAPK.F                                         |
| HsHeLa_Control-MG_Ti_20   | 2.639  |    | 0.3169 | 1516.45 | 1516.61 | 3971.7  | 2 312.3 53.3 2 K.FSPGAPGGSGSQPNQK.L                                   |
| HsHeLa_Control-MG_Ti_20   | 4.2708 |    | 0.2946 | 2597.85 | 2598.83 | 7212.3  | 1 1317.6 37.5 2 K.LGHPEALSAGTGSPQPPSFTYAQQR.E                         |
| HsFLAG-Control_Hela_Ti_1  | 2.7854 |    | 0.1973 | 2599.91 | 2598.83 | 11079.1 | 1 613.8 33.3 1 K.LGHPEALSAGTGSPQPPSFTYAQQR.E                          |
| gi 4503765 ref NF         | 5      | 10 | 0.092  | 632     | 71175   | 7.4 U   | fragile X mental retardation 1 [Homo sapiens]                         |
| * Hs293FLP_TREX_Ti_104.1  | 2.7158 |    | 0.1747 | 1198.35 | 1198.41 | 4598.7  | 1 773.9 77.8 2 K.IKLDVPEDLR.Q                                         |
| * Hs293FLP_TREX_Ti_105.1  | 2.5106 |    | 0.1804 | 1075.36 | 1076.24 | 7323.1  | 2 556.4 71.4 1 R.FHEQFIVR.E                                           |
| * Hs293FLP_TREX_Ti_103.1  | 3.0298 |    | 0.1665 | 1088.24 | 1088.21 | 6847.6  | 4 923.7 81.2 1 R.VRIEAENEK.N                                          |
| * Hs293FLP_TREX_Ti_103.1  | 3.7532 |    | 0.3236 | 1479.32 | 1477.53 | 7569.3  | 1 1301.9 79.2 2 K.ENSTHFSQPNSTK.V                                     |
| * Hs293FLP_TREX_Ti_105.1  | 5.0958 |    | 0.4143 | 1842.52 | 1842.14 | 7050.9  | 1 1760 70.6 4 R.VLVASSVVGESQKPELK.A                                   |
| gi 8659574 ref NF         | 4      | 7  | 0.092  | 575     | 61521   | 5.6 U   | transcription factor binding to IGHM enhancer 3 [Homo sapiens]        |
| * HsHeLa3_Ti_104.2299.229 | 4.5652 |    | 0.4722 | 2515.85 | 2516.77 | 3888.6  | 1 624 46.2 2 R.SSLPISLQATPATPATLSASSSAGGSR.T                          |
| * HsHeLa3_Ti_105.1272.127 | 2.243  |    | 0.1893 | 1194.56 | 1195.32 | 7058.6  | 8 418.7 61.1 2 K.VQTHLENPTR.Y                                         |
| * HsHeLa3_Ti_105.1286.128 | 2.8853 |    | 0.2648 | 1196.66 | 1195.32 | 8577.1  | 2 1249 83.3 1 K.VQTHLENPTR.Y                                          |
| * HsHeLa3_Ti_102.2011.201 | 4.4611 |    | 0.3894 | 1530.71 | 1529.73 | 5993.4  | 1 1320.6 73.3 2 R.AASDPLLSSVSPAVSK.A                                  |
| gi 24797086 ref N         | 6      | 12 | 0.091  | 1115    | 125545  | 4.9 U   | RAN binding protein 5 [Homo sapiens]                                  |
| * HsFLAG-Control_HeLa_S1( | 3.4409 |    | 0.2846 | 1843.9  | 1842.96 | 7125.7  | 1 824 60 2 R.NLIDEDGNNQWPEGLK.F                                       |
| * HsFLAG-Control_HeLa_S1( | 4.3402 |    | 0.4261 | 1571.23 | 1569.76 | 6209.4  | 1 979 69.2 5 K.FLFDVSSQNVGLR.E                                        |

|                   |                          |        |        |         |         |         |      |        |      |   |                                                                                         |
|-------------------|--------------------------|--------|--------|---------|---------|---------|------|--------|------|---|-----------------------------------------------------------------------------------------|
| *                 | HsFLAG-Control_HeLa_S1(  | 4.0526 | 0.1947 | 3087.41 | 3087.51 | 10489.9 | 1    | 927.9  | 28   | 1 | R.EAALHIFWNFPFGIFGNQQQHYLDVIK.R                                                         |
| *                 | HsFLAG-Control_HeLa_S1(  | 4.2314 | 0.3061 | 1830.68 | 1831.13 | 7357.8  | 1    | 988.6  | 53.1 | 2 | R.ATAAFILANEHNVALFK.H                                                                   |
| *                 | HsFLAG-Control_HeLa_S1(  | 3.0789 | 0.3771 | 2104.24 | 2103.38 | 10318.9 | 1    | 656.6  | 39.5 | 1 | K.LVLEQVVTSIASVADTAEK.F                                                                 |
| *                 | HsFLAG-Control_HeLa_S1(  | 2.1634 | 0.2185 | 1037.72 | 1038.19 | 6121.9  | 9    | 404.5  | 62.5 | 1 | K.HIVENAVQK.E                                                                           |
| gi 27501446 ref N |                          | 1      | 2      | 0.091   | 198     | 22092   | 5.3  | U      |      |   | density-regulated protein [Homo sapiens]                                                |
| *                 | HsHeLa3_Ti_102.1259.125  | 3.7731 | 0.3368 | 1850.45 | 1849.86 | 6244.3  | 1    | 680.6  | 52.9 | 2 | K.QEAGISEGQGTAGEEEEEK.K                                                                 |
| gi 4507149 ref NF |                          | 1      | 4      | 0.091   | 154     | 15936   | 6.1  | U      |      |   | superoxide dismutase 1, soluble [Homo sapiens]                                          |
| *                 | Hs293FLP_TREX_Ti_102.2   | 3.8877 | 0.3597 | 1501.81 | 1502.67 | 6118.4  | 4    | 980    | 65.4 | 4 | K.GDGPVQGIINFEQK.E                                                                      |
| gi 16418385 ref N |                          | 1      | 2      | 0.09    | 212     | 22741   | 9.7  | U      |      |   | mediator of RNA polymerase II transcription subunit MED8 isoform 2 [Homo sapiens]       |
| gi WM4            |                          | 1      | 2      | 0.065   | 291     | 31872   | 5.4  | U      |      |   | MEDIATOR_Med8 (WT) [Homo sapiens]                                                       |
| gi Med8_S82D      |                          | 1      | 2      | 0.065   | 291     | 31900   | 5.3  | U      |      |   | MEDIATOR_Med8 S82D Mutant [Homo sapiens]                                                |
| gi Med8_S82A      |                          | 1      | 2      | 0.065   | 291     | 31856   | 5.4  | U      |      |   | MEDIATOR_Med8 S82A Mutant [Homo sapiens]                                                |
| gi MM1            |                          | 1      | 2      | 0.065   | 291     | 31900   | 5.4  | U      |      |   | MEDIATOR_Med8 (BC box L166P-C170F double mutant) [Homo sapiens]                         |
| gi LP1            |                          | 1      | 2      | 0.065   | 291     | 31830   | 5.4  | U      |      |   | MEDIATOR_Med8 (BC box L166A single mutant) [Homo sapiens]                               |
| gi 48762706 ref N |                          | 1      | 2      | 0.071   | 268     | 29080   | 7.5  | U      |      |   | mediator of RNA polymerase II transcription subunit MED8 isoform 4 [Homo sapiens]       |
| gi 48762704 ref N |                          | 1      | 2      | 0.106   | 179     | 19002   | 9.1  | U      |      |   | mediator of RNA polymerase II transcription subunit MED8 isoform 1 [Homo sapiens]       |
| gi 48762702 ref N |                          | 1      | 2      | 0.063   | 301     | 32819   | 9.1  | U      |      |   | mediator of RNA polymerase II transcription subunit MED8 isoform 3 [Homo sapiens]       |
| gi 42490747 ref N |                          | 1      | 2      | 0.106   | 179     | 19002   | 9.1  | U      |      |   | mediator of RNA polymerase II transcription subunit MED8 isoform 1 [Homo sapiens]       |
| gi 21717644 gb A  |                          | 1      | 2      | 0.071   | 268     | 29080   | 7.5  | U      |      |   | MEDIATOR_MED8 {mediator of RNA polymerase II transcription subunit MED8} [Homo sapiens] |
|                   | HsFLAG-Control_HeLa_NE   | 4.3625 | 0.5082 | 1966.56 | 1966.2  | 7636.7  | 1    | 866.8  | 52.8 | 2 | K.QTFNPTDTNALVAAVAFGK.G                                                                 |
| gi 4507357 ref NF |                          | 1      | 5      | 0.09    | 199     | 22391   | 8.2  | U      |      |   | transgelin 2 [Homo sapiens]                                                             |
| gi 89028870 ref X |                          | 1      | 5      | 0.14    | 129     | 14618   | 5.5  | U      |      |   | PREDICTED: similar to Transgelin-2 [Homo sapiens]                                       |
| gi 89028241 ref X |                          | 1      | 5      | 0.14    | 129     | 14618   | 5.5  | U      |      |   | PREDICTED: similar to Transgelin-2 [Homo sapiens]                                       |
|                   | Hs293FLP_Ti_302.3943.39  | 4.0285 | 0.3719 | 2103.74 | 2101.32 | 5927.8  | 1    | 746.1  | 55.9 | 5 | R.YGINTTDIFQTVDLWEGK.N                                                                  |
| gi 41393554 ref N |                          | 5      | 10     | 0.089   | 371     | 43728   | 9.9  | U      |      |   | LUC7-like isoform b [Homo sapiens]                                                      |
| gi 8922297 ref NF |                          | 5      | 10     | 0.102   | 325     | 38405   | 10   | U      |      |   | LUC7-like isoform a [Homo sapiens]                                                      |
|                   | Hs293FLP_Ti_303.1279.12  | 2.8366 | 0.2292 | 1167.66 | 1168.29 | 4978    | 1    | 557.6  | 66.7 | 1 | K.VHELNEEIGK.L                                                                          |
|                   | HsHeLa_Control-MG_Ti_20  | 2.9432 | 0.147  | 1168.12 | 1168.29 | 5296.9  | 1    | 676.8  | 77.8 | 1 | K.VHELNEEIGK.L                                                                          |
|                   | Hs293FLP_Ti_303.1278.12  | 3.1115 | 0.1986 | 1170.57 | 1168.29 | 4706.3  | 1    | 711    | 83.3 | 1 | K.VHELNEEIGK.L                                                                          |
|                   | HsHeLa_Control_Ti_102.10 | 3.6501 | 0.2978 | 1578.35 | 1575.63 | 7585.8  | 1    | 1320.6 | 71.4 | 4 | K.AEQLGAEGNVDESQK.I                                                                     |
|                   | HsHeLa_Control-MG_Ti_10  | 1.9477 | 0.1266 | 844.78  | 844.946 | 3744.8  | 1    | 350.9  | 64.3 | 3 | R.LADHFGGK.L                                                                            |
| gi 4506133 ref NF |                          | 2      | 4      | 0.089   | 369     | 40926   | 7.4  | U      |      |   | phosphoribosyl pyrophosphate synthetase-associated protein 2 [Homo sapiens]             |
| *                 | HsHeLa_Control-MG_Ti_10  | 4.1299 | 0.1403 | 2082.97 | 2083.35 | 3443.2  | 3    | 598.1  | 56.2 | 2 | R.ASPFLLQYIQEEIPDYR.N                                                                   |
| *                 | HsHeLa_Control-MG_Ti_10  | 3.9264 | 0.3904 | 1717.3  | 1716.01 | 5671.6  | 1    | 841.1  | 63.3 | 2 | K.IFVMATHGLLSSDAPR.R                                                                    |
| gi 4504035 ref NF |                          | 3      | 6      | 0.088   | 693     | 76715   | 6.9  | U      |      |   | guanine monophosphate synthetase [Homo sapiens]                                         |
| *                 | HsFLAG-Control_HeLa_NE   | 4.1261 | 0.4107 | 2179.78 | 2180.55 | 5649.3  | 1    | 670.9  | 52.8 | 3 | R.ELFVQSEIFPLETPAFAIK.E                                                                 |
| *                 | HsGST-MOCK_Ti_103.125    | 3.1643 | 0.1185 | 1404.67 | 1404.56 | 9299.4  | 6    | 841.3  | 68.2 | 1 | R.KRESQSVVEALK.K                                                                        |
| *                 | HsFLAG-Control_HeLa_S1(  | 4.5022 | 0.3609 | 3247.75 | 3246.81 | 9158.6  | 1    | 755.6  | 25   | 2 | R.VVYIFGPPVKEPPTDVTPTFLTGTGLSTLR.Q                                                      |
| gi 4504901 ref NF |                          | 2      | 3      | 0.088   | 521     | 57887   | 5    | U      |      |   | karyopherin alpha 4 [Homo sapiens]                                                      |
| *                 | HsFLAG-Control_HeLa_NE   | 4.2584 | 0.2927 | 3014.98 | 3014.28 | 11991.7 | 1    | 1045.2 | 26.8 | 1 | R.VQNTSLEAIVQNASSDNQGIQLSAVQAAR.K                                                       |
| *                 | Hs293FLP-MG_Ti_306.324   | 4.3078 | 0.2327 | 1812.49 | 1812.12 | 7584.7  | 1    | 1820.7 | 68.8 | 2 | K.DAQQVVQVLDGLSNILK.M                                                                   |
| gi 57527756 ref N |                          | 3      | 8      | 0.088   | 454     | 51103   | 5.9  | U      |      |   | odorant response abnormal 4 [Homo sapiens]                                              |
| *                 | HsFLAG-Control_MG_293_   | 5.094  | 0.3807 | 1594.88 | 1595.8  | 7301.2  | 1    | 1167.7 | 67.9 | 6 | K.AFVSGLLIGQCSSQK.D                                                                     |
| *                 | HsHeLa_Control-MG_Ti_20  | 3.1661 | 0.3411 | 1420.45 | 1420.48 | 5013.8  | 1    | 893.3  | 70.8 | 1 | R.GNTQATSHSFDVR.V                                                                       |
| *                 | HsHeLa_Control-MG_Ti_20  | 2.997  | 0.1827 | 1411.7  | 1409.63 | 10693   | 1    | 1466.5 | 72.7 | 1 | R.VLTQLLLNSDHR.S                                                                        |
| gi 4557663 ref NF |                          | 2      | 6      | 0.088   | 339     | 39222   | 5.4  | U      |      |   | immunoglobulin binding protein 1 [Homo sapiens]                                         |
| *                 | HsFLAG-Control_HeLa_S1(  | 4.3824 | 0.2596 | 1478.06 | 1477.57 | 8756.3  | 1    | 2429.8 | 87.5 | 5 | R.NEDLEEIASTDLK.Y                                                                       |
|                   | HsFLAG-Control_HeLa_S1(  | 4.0416 | 0.3672 | 2063.65 | 2061.29 | 11506.7 | 1    | 1153.9 | 56.2 | 1 | R.WIDISLEEIESIDQEIK.I                                                                   |
| gi 13027644 ref N |                          | 2      | 2      | 0.088   | 240     | 24614   | 11.2 | U      |      |   | small nuclear ribonucleoprotein polypeptide N [Homo sapiens]                            |



|                   |                           |        |        |         |         |         |   |                                                                                                       |      |    |                                     |
|-------------------|---------------------------|--------|--------|---------|---------|---------|---|-------------------------------------------------------------------------------------------------------|------|----|-------------------------------------|
| gi 4507135 ref NF | 2                         | 2      | 0.088  | 240     | 24614   | 11.2    | U | small nuclear ribonucleoprotein polypeptide N [Homo sapiens]                                          |      |    |                                     |
| gi 4507125 ref NF | 2                         | 2      | 0.091  | 231     | 23656   | 10.9    | U | small nuclear ribonucleoprotein polypeptide B/B' isoform B [Homo sapiens]                             |      |    |                                     |
| gi 38150007 ref N | 2                         | 2      | 0.088  | 240     | 24610   | 11.2    | U | small nuclear ribonucleoprotein polypeptide B/B' isoform B' [Homo sapiens]                            |      |    |                                     |
| gi 13027650 ref N | 2                         | 2      | 0.088  | 240     | 24614   | 11.2    | U | small nuclear ribonucleoprotein polypeptide N [Homo sapiens]                                          |      |    |                                     |
| gi 13027648 ref N | 2                         | 2      | 0.088  | 240     | 24614   | 11.2    | U | small nuclear ribonucleoprotein polypeptide N [Homo sapiens]                                          |      |    |                                     |
| gi 13027646 ref N | 2                         | 2      | 0.088  | 240     | 24614   | 11.2    | U | small nuclear ribonucleoprotein polypeptide N [Homo sapiens]                                          |      |    |                                     |
|                   | HsFLAG-MOCK_300mM_T       | 3.5787 | 0.2807 | 1724.48 | 1723.87 | 5651    | 5 | 789.2                                                                                                 | 66.7 | 1  | K.HMNLILCDCDEF.R.K                  |
|                   | Hs293FLP_TREX_Ti_106.2    | 3.19   | 0.0979 | 883.31  | 883.166 | 3985.4  | 3 | 898.1                                                                                                 | 92.9 | 1  | R.VLGLVLLR.G                        |
| gi 21361794 ref N | 8                         | 20     | 0.085  | 1230    | 136375  | 5.8     | U | TIP120 protein [Homo sapiens]                                                                         |      |    |                                     |
| *                 | HsFLAG-Control_HeLa_S1(   | 3.7805 | 0.3154 | 2047.35 | 2048.35 | 6164.5  | 1 | 757.3                                                                                                 | 52.9 | 4  | K.VIRPLDQPSSFDPATPYIK.D             |
| *                 | HsFLAG-Control_HeLa_S1(   | 3.5762 | 0.1391 | 2049.78 | 2048.35 | 10857.6 | 2 | 1127.2                                                                                                | 36.8 | 1  | K.VIRPLDQPSSFDPATPYIK.D             |
| *                 | HsFLAG-Control_MG_293_    | 3.5793 | 0.1971 | 1084.38 | 1084.35 | 7870.9  | 1 | 1465.6                                                                                                | 80   | 2  | K.ALTLIAGSPLK.I                     |
| *                 | HsHeLa3_Ti_104.2157.215   | 2.4669 | 0.2012 | 1084.64 | 1084.35 | 4401.6  | 1 | 308.5                                                                                                 | 65   | 2  | K.ALTLIAGSPLK.I                     |
| *                 | HsHeLa3_Ti_104.4347.434   | 5.0224 | 0.2699 | 1484.75 | 1484.78 | 6569.5  | 1 | 1514.8                                                                                                | 80.8 | 2  | K.ISGSILNELIGLVR.S                  |
| *                 | HsFLAG-Control_HeLa_S1(   | 5.3632 | 0.4071 | 3281.89 | 3281.73 | 8884.7  | 1 | 1152.5                                                                                                | 28.3 | 2  | K.SAASYALGSISVGNLPEYLPFVLQEITSQPK.R |
| *                 | HsFLAG-Control_HeLa_S1(   | 2.6307 | 0.2115 | 1939.51 | 1939.27 | 10510.4 | 2 | 529.1                                                                                                 | 41.2 | 1  | R.VALVTFNSAAHNKPSLIR.D              |
| *                 | HsFLAG-Control_MG_293_    | 3.7971 | 0.2705 | 1328.17 | 1326.58 | 6453.3  | 7 | 915.1                                                                                                 | 70.8 | 6  | R.AVAALLTIPEAEK.S                   |
| gi 14702169 ref N | 3                         | 29     | 0.085  | 516     | 57371   | 7.5     | U | plasminogen activator, tissue type isoform 3 precursor [Homo sapiens]                                 |      |    |                                     |
| gi 4505861 ref NF | 3                         | 29     | 0.078  | 562     | 62917   | 7.8     | U | plasminogen activator, tissue type isoform 1 preproprotein [Homo sapiens]                             |      |    |                                     |
|                   | Hs283FLP_Ti_103.1571.15   | 5.1155 | 0.4286 | 1618.68 | 1618.83 | 5099.4  | 1 | 1424.8                                                                                                | 80   | 9  | K.VYTAQNPSAQALGLGK.H                |
|                   | HsFLAG-MOCK_150mM_T       | 5.4732 | 0.3467 | 2030.74 | 2029.17 | 7621.3  | 1 | 1708.6                                                                                                | 71.9 | 16 | K.EFDDDTYDNDIALQLK.S                |
|                   | Hs283FLP_Ti_104.1529.15   | 3.296  | 0.2476 | 1336.68 | 1336.45 | 4606.8  | 1 | 849.3                                                                                                 | 80   | 4  | K.HEALSPFYSER.L                     |
| gi 6598323 ref NF | 2                         | 15     | 0.085  | 445     | 50663   | 6.5     | U | GDP dissociation inhibitor 2 [Homo sapiens]                                                           |      |    |                                     |
| *                 | HsHeLa3_Ti_103.4651.465   | 3.6292 | 0.4274 | 1981.07 | 1981.27 | 6432.6  | 1 | 944.7                                                                                                 | 55.6 | 1  | K.VPSTEAEALASSLMGLFEK.R             |
|                   | HsF-IP-293_Ti_206.2734.2i | 5.4817 | 0.4503 | 2142.55 | 2142.46 | 4270.1  | 1 | 1265.1                                                                                                | 72.2 | 14 | K.SPLYPLYGLGELPQGFAR.L              |
| gi 7661920 ref NF | 2                         | 16     | 0.085  | 411     | 46871   | 6.7     | U | DEAD (Asp-Glu-Ala-Asp) box polypeptide 48 [Homo sapiens]                                              |      |    |                                     |
|                   | HsFLAG-Control_HeLa_NE    | 4.3475 | 0.477  | 1828.66 | 1829.07 | 5470.9  | 1 | 956.4                                                                                                 | 66.7 | 13 | R.GIYAYGFEKPSAIQQR.A                |
| *                 | HsFLAG-Control_HeLa_NE    | 4.6352 | 0.3398 | 2140.59 | 2141.43 | 8355.3  | 1 | 1132.1                                                                                                | 52.8 | 3  | R.GLDVPQVSLIINYDLPNNR.E             |
| gi 16117787 ref N | 1                         | 2      | 0.085  | 117     | 13293   | 11.5    | U | ribosomal protein L34 [Homo sapiens]                                                                  |      |    |                                     |
| gi 89036972 ref X | 1                         | 2      | 0.08   | 125     | 14515   | 11.4    | U | PREDICTED: similar to ribosomal protein L34 [Homo sapiens]                                            |      |    |                                     |
| gi 89036654 ref X | 1                         | 2      | 0.185  | 54      | 6255    | 10.9    | U | PREDICTED: similar to ribosomal protein L34 [Homo sapiens]                                            |      |    |                                     |
| gi 16117789 ref N | 1                         | 2      | 0.085  | 117     | 13293   | 11.5    | U | ribosomal protein L34 [Homo sapiens]                                                                  |      |    |                                     |
|                   | Hs293FLP_TREX_Ti_105.1    | 2.7934 | 0.1153 | 1154.47 | 1154.27 | 6736.8  | 2 | 925.4                                                                                                 | 77.8 | 2  | R.RLSYNTASNK.T                      |
| gi 4501955 ref NF | 6                         | 13     | 0.084  | 1014    | 113135  | 8.9     | U | poly (ADP-ribose) polymerase family, member 1 [Homo sapiens]                                          |      |    |                                     |
| *                 | HsFLAG-MOCK_300mM_T       | 2.641  | 0.2797 | 1518.03 | 1517.64 | 6375.6  | 5 | 565.4                                                                                                 | 53.8 | 1  | K.RKGDEVDGVDEVAK.K                  |
| *                 | HsFLAG-Control_HeLa_NE    | 4.5279 | 0.4527 | 1626.42 | 1625.77 | 8552.4  | 1 | 1614.3                                                                                                | 71.4 | 3  | R.VVSEDFLQDVASSTK.S                 |
| *                 | HsHeLa3_Ti_106.3211.321   | 4.7637 | 0.385  | 2141.53 | 2139.5  | 8082.5  | 1 | 1448.2                                                                                                | 58.3 | 1  | K.SLQELFLAHILSPWGAEVK.A             |
| *                 | HsFLAG-MOCK_300mM_T       | 5.269  | 0.4014 | 3187.55 | 3187.71 | 7744.3  | 1 | 1316.4                                                                                                | 31.2 | 3  | K.SLQELFLAHILSPWGAEVKAEPVEVVAPR.G   |
| *                 | HsFLAG-Control_HeLa_NE    | 3.6979 | 0.313  | 1497.57 | 1495.72 | 7590.1  | 1 | 902                                                                                                   | 65.4 | 2  | K.KPPLLNADSVQAK.V                   |
| *                 | HsFLAG-Control_HeLa_NE    | 4.3031 | 0.4379 | 1378.21 | 1378.57 | 7118.4  | 1 | 1449.6                                                                                                | 79.2 | 3  | R.TTNFAGILSQGLR.I                   |
| gi 20149598 ref N | 1                         | 2      | 0.084  | 287     | 31282   | 9.5     | U | solute carrier family 25 (mitochondrial carrier; dicarboxylate transporter), member 10 [Homo sapiens] |      |    |                                     |
| *                 | HsFLAG-Control_293_Ti_1(  | 4.2424 | 0.4268 | 2300.66 | 2299.68 | 8676.2  | 1 | 862.5                                                                                                 | 43.5 | 2  | K.VLLGSVSGLAGGFVGTADLVNVR.M         |
| gi 21237802 ref N | 6                         | 8      | 0.083  | 1105    | 122721  | 5.8     | U | SWI/SNF-related matrix-associated actin-dependent regulator of chromatin c1 [Homo sapiens]            |      |    |                                     |
| *                 | HsHeLa3_Ti_103.2356.235   | 3.1964 | 0.2631 | 1781.13 | 1780.93 | 7535.3  | 1 | 1130.1                                                                                                | 64.3 | 1  | K.FWESPETVSQLDSVR.V                 |
| *                 | HsHeLa3_Ti_105.5166.516   | 5.3508 | 0.3779 | 2079.05 | 2078.42 | 9016.1  | 1 | 1853                                                                                                  | 61.1 | 2  | K.TLAGLVVQLLQFQEDAFGK.H             |
| *                 | HsHeLa3_Ti_106.2704.270   | 4.1818 | 0.2695 | 2613.55 | 2615.01 | 4303.6  | 1 | 449.2                                                                                                 | 45.2 | 1  | K.TLVQNNCLTRPNIYLPIDILK.L           |
|                   | HsHeLa3_Ti_103.1911.191   | 2.5713 | 0.3068 | 1553.68 | 1553.68 | 3453.2  | 1 | 333                                                                                                   | 62.5 | 1  | R.LNPQEYLTSTACR.R                   |
|                   | HsHeLa3_Ti_104.2471.247   | 3.7585 | 0.261  | 1433.7  | 1432.59 | 6393.3  | 1 | 1149                                                                                                  | 80   | 1  | R.TQDECILHFLR.L                     |
|                   | HsHeLa3_Ti_105.3182.318   | 3.4996 | 0.1814 | 1333.68 | 1332.64 | 6963.5  | 1 | 1092.7                                                                                                | 72.7 | 2  | K.SLVALLVETQMK.K                    |

|                   |                          |        |        |         |         |         |                                                                                                        |        |      |                                       |
|-------------------|--------------------------|--------|--------|---------|---------|---------|--------------------------------------------------------------------------------------------------------|--------|------|---------------------------------------|
| gi 13699868 ref N | 4                        | 4      | 0.083  | 935     | 101531  | 7.2 U   | methylene tetrahydrofolate dehydrogenase 1 [Homo sapiens]<br>K.YITSLNEDSTVHGFLVQLPLDSENSINTEEVINAIPEK. |        |      |                                       |
| *                 | Hs293FLP-MG_Ti_203.446   | 3.7734 | 0.261  | 4302.21 | 4302.74 | 11348.7 | 1                                                                                                      | 827.5  | 19.7 | 1 D                                   |
| *                 | HsFLAG-Control_MG_293_   | 3.8475 | 0.3875 | 1631.71 | 1631.91 | 7371.7  | 1                                                                                                      | 1187.4 | 63.3 | 1 K.YVVVTGITPTPLGEGK.S                |
| *                 | HsFLAG-Control_293_Ti_20 | 3.9385 | 0.2652 | 1097.64 | 1098.29 | 8215    | 1                                                                                                      | 1875.2 | 85   | 1 K.GALALAAQAVQR.A                    |
| *                 | HsGST-MOCK_Ti_104.126    | 2.8019 | 0.104  | 1391.2  | 1391.53 | 9959.2  | 1                                                                                                      | 784    | 59.1 | 1 K.THLSLSHNPEQK.G                    |
| gi 89034039 ref X | 3                        | 4      | 0.083  | 747     | 85105   | 4.9 U   | PREDICTED: similar to heterogeneous nuclear ribonucleoprotein U [Homo sapiens]                         |        |      |                                       |
| gi 89034820 ref X | 3                        | 4      | 0.069  | 904     | 101753  | 5.4 U   | PREDICTED: similar to heterogeneous nuclear ribonucleoprotein U [Homo sapiens]                         |        |      |                                       |
|                   | HsHeLa_Control-MG_Ti_20  | 4.723  | 0.3876 | 3932.16 | 3932.39 | 8144.6  | 1                                                                                                      | 925.4  | 25.8 | 2 K.NCVVELNFGQKEEPPPEEFVFIHAVPVEER.V  |
|                   | HsFlag1P_Ti_103.2987.298 | 2.9094 | 0.2917 | 1609.37 | 1608.85 | 9675.2  | 1                                                                                                      | 948.6  | 61.5 | 1 R.YNVLGAETVLNQMR.M                  |
|                   | HsGST-MOCK_Ti_305.201    | 4.7112 | 0.3938 | 1733.66 | 1733.93 | 10768.6 | 1                                                                                                      | 2558.6 | 78.6 | 1 K.SRDLLVQQASQCLSK.L                 |
| gi 5031677 ref NF | 3                        | 5      | 0.083  | 699     | 78061   | 6.7 U   | dynamin 1-like protein isoform 3 [Homo sapiens]                                                        |        |      |                                       |
| gi 6996007 ref NF | 3                        | 5      | 0.082  | 710     | 79456   | 6.9 U   | dynamin 1-like protein isoform 2 [Homo sapiens]                                                        |        |      |                                       |
| gi 6996005 ref NF | 3                        | 5      | 0.079  | 736     | 81891   | 6.8 U   | dynamin 1-like protein isoform 1 [Homo sapiens]                                                        |        |      |                                       |
|                   | HsFLAG-Control_HeLa_S1(  | 4.4319 | 0.479  | 2437.89 | 2438.7  | 9416.6  | 1                                                                                                      | 1497.8 | 54.8 | 2 R.INVLAAQYQSLLSYGEVDDK.S            |
|                   | HsFLAG-Control_HeLa_NE   | 5.4745 | 0.4867 | 2211.6  | 2212.55 | 9695.5  | 1                                                                                                      | 1720.4 | 60   | 2 R.TLESVDPLGGLNTIDILTAIR.N           |
|                   | HsFLAG-Control_HeLa_S1(  | 4.2475 | 0.4259 | 1557.39 | 1557.84 | 5940.3  | 1                                                                                                      | 739.6  | 64.3 | 1 K.GHAVNLLDVPVVAR.K                  |
| gi 58761486 ref N | 6                        | 21     | 0.083  | 544     | 60463   | 6.5 U   | chaperonin containing TCP1, subunit 3 isoform b [Homo sapiens]                                         |        |      |                                       |
| gi 63162572 ref N | 6                        | 21     | 0.083  | 545     | 60534   | 6.5 U   | chaperonin containing TCP1, subunit 3 isoform a [Homo sapiens]                                         |        |      |                                       |
|                   | Hs293FLP_TREX_Ti_104.1   | 2.2961 | 0.1026 | 1120.5  | 1121.28 | 3931.9  | 6                                                                                                      | 264.6  | 61.1 | 1 R.EIQVQHPAAK.S                      |
|                   | HsFLAG-Control_HeLa_NE   | 2.8479 | 0.207  | 1120.68 | 1121.28 | 5081.4  | 2                                                                                                      | 544.8  | 72.2 | 2 R.EIQVQHPAAK.S                      |
|                   | HsFLAG-Control_HeLa_S1(  | 2.9787 | 0.1096 | 1121.72 | 1121.28 | 7302    | 1                                                                                                      | 829.2  | 77.8 | 3 R.EIQVQHPAAK.S                      |
|                   | HsFLAG-Control_HeLa_S1(  | 3.5163 | 0.1443 | 1431.36 | 1429.62 | 6655.5  | 1                                                                                                      | 954.9  | 70.8 | 4 K.IPGGIIEDSCVLR.G                   |
|                   | HsFLAG-Control_HeLa_S1(  | 4.196  | 0.2605 | 1167.39 | 1167.39 | 7385.7  | 2                                                                                                      | 1954.6 | 90   | 10 R.AVAQALEVIPR.T                    |
|                   | HsFLAG-Control_MG_293_   | 2.9597 | 0.1284 | 1187.73 | 1186.44 | 11238.3 | 1                                                                                                      | 1627.4 | 80   | 1 K.TAVETAVLLLR.I                     |
| gi 15149476 ref N | 3                        | 7      | 0.082  | 660     | 75379   | 6.7 U   | arginyl-tRNA synthetase [Homo sapiens]                                                                 |        |      |                                       |
| *                 | HsFLAG-Control_HeLa_S1(  | 3.7339 | 0.3463 | 2153.72 | 2153.44 | 6359    | 1                                                                                                      | 982.6  | 52.6 | 3 K.AAYPDLENPPLLVTSPQQA.K             |
| *                 | HsFLAG-Control_HeLa_S1(  | 2.8322 | 0.2124 | 2200.59 | 2200.54 | 6792.9  | 1                                                                                                      | 455.6  | 41.7 | 1 K.FPDYLTVSPPIGDLQVFK.E              |
| *                 | HsFLAG-Control_293_Ti_1( | 3.5265 | 0.321  | 1643.4  | 1644.02 | 2855.3  | 1                                                                                                      | 926.6  | 78.6 | 3 K.IVFPVPGCSIPLTIVK.S                |
| gi 11968003 ref N | 2                        | 4      | 0.082  | 392     | 44935   | 6.6 U   | 5-azacytidine induced 2 [Homo sapiens]                                                                 |        |      |                                       |
| *                 | Hs293FLP_Ti_304.1445.14  | 4.0811 | 0.3709 | 1584    | 1583.75 | 6824    | 1                                                                                                      | 919.1  | 60.7 | 3 K.ALCHTTSSPLPGDVK.V                 |
| *                 | Hs293FLP_Ti_303.1433.14  | 3.2012 | 0.3763 | 1956.74 | 1956    | 3467.6  | 1                                                                                                      | 292    | 50   | 1 R.SIPNDGTCFQEHSSYGR.N               |
| gi 32189380 ref N | 4                        | 13     | 0.082  | 380     | 42151   | 5.6 U   | nucleoporin 43kDa [Homo sapiens]                                                                       |        |      |                                       |
| gi 38605733 ref N | 4                        | 13     | 0.082  | 380     | 42151   | 5.6 U   | nucleoporin 43kDa [Homo sapiens]                                                                       |        |      |                                       |
|                   | HsFLAG-Control_HeLa_NE   | 5.0199 | 0.4905 | 1862.41 | 1862.05 | 8213.9  | 1                                                                                                      | 1457.1 | 62.5 | 6 R.TIDNADSSTLHAVTFLR.T               |
|                   | HsFLAG-MOCK_300mM_T      | 4.6247 | 0.4296 | 3357.46 | 3356.8  | 8247.1  | 1                                                                                                      | 1186.1 | 28.3 | 1 R.TIDNADSSTLHAVTFLRTPEILTVNSIGQLK.I |
|                   | HsFLAG-Control_HeLa_NE   | 3.1638 | 0.4179 | 1512.72 | 1513.78 | 5929    | 1                                                                                                      | 496    | 61.5 | 2 R.TPEILTVNSIGQLK.I                  |
|                   | HsFLAG-Control_HeLa_NE   | 3.9637 | 0.3671 | 1513.02 | 1513.78 | 7659.5  | 1                                                                                                      | 948.9  | 65.4 | 4 R.TPEILTVNSIGQLK.I                  |
| gi 4885063 ref NF | 2                        | 4      | 0.082  | 364     | 39456   | 6.9 U   | fructose-bisphosphate aldolase C [Homo sapiens]                                                        |        |      |                                       |
| *                 | HsHeLa3_Ti_103.2146.214  | 4.0318 | 0.1664 | 2273.72 | 2274.45 | 4600.5  | 1                                                                                                      | 432    | 45.5 | 2 K.GVVPLAGTDGETTTQGLDGLSER.C         |
|                   | HsHeLa3_Ti_103.1446.144  | 2.1033 | 0.1778 | 763.77  | 763.955 | 6992.1  | 2                                                                                                      | 713.3  | 75   | 2 K.VLAAVYK.A                         |
| gi 35493987 ref N | 4                        | 6      | 0.082  | 158     | 18007   | 8.7 U   | ubiquitin-conjugating enzyme E2I [Homo sapiens]                                                        |        |      |                                       |
| gi 4507785 ref NF | 4                        | 6      | 0.082  | 158     | 18007   | 8.7 U   | ubiquitin-conjugating enzyme E2I [Homo sapiens]                                                        |        |      |                                       |
| gi 35494003 ref N | 4                        | 6      | 0.082  | 158     | 18007   | 8.7 U   | ubiquitin-conjugating enzyme E2I [Homo sapiens]                                                        |        |      |                                       |
| gi 35493996 ref N | 4                        | 6      | 0.082  | 158     | 18007   | 8.7 U   | ubiquitin-conjugating enzyme E2I [Homo sapiens]                                                        |        |      |                                       |
|                   | HsFLAG-MOCK_300mM_T      | 3.7213 | 0.344  | 1444.26 | 1443.69 | 4589.7  | 1                                                                                                      | 740.7  | 75   | 2 R.KDHPFGFVAVPTK.N                   |
|                   | HsHeLa3_Ti_105.2036.203  | 2.1339 | 0.3223 | 1314.58 | 1315.51 | 3497.4  | 1                                                                                                      | 405.8  | 63.6 | 1 K.DHPFGFVAVPTK.N                    |
|                   | HsGST-MOCK_Ti_405.234    | 2.2882 | 0.1911 | 1315.53 | 1315.51 | 3335    | 4                                                                                                      | 327.8  | 59.1 | 1 K.DHPFGFVAVPTK.N                    |
|                   | HsHeLa3_Ti_105.2035.203  | 2.96   | 0.3667 | 1315.7  | 1315.51 | 3483.2  | 1                                                                                                      | 566.8  | 72.7 | 2 K.DHPFGFVAVPTK.N                    |

|                   |                          |        |        |         |         |        |                                                                                        |
|-------------------|--------------------------|--------|--------|---------|---------|--------|----------------------------------------------------------------------------------------|
| gi 40254898 ref N | 6                        | 12     | 0.081  | 1165    | 130277  | 7.8 U  | hypothetical protein LOC54790 [Homo sapiens]                                           |
| *                 | HsFlag1P_Ti_102.1975.197 | 5.655  | 0.4745 | 2414.59 | 2415.46 | 7608.6 | 1 989.5 47.8 1 K.LASGEEFCSGSSSNLQAPGGSSER.Y                                            |
| *                 | HsHeLa_Control-MG_Ti_10  | 2.9576 | 0.3319 | 2424.07 | 2424.59 | 4882.5 | 1 451.4 44.7 1 K.NKEEILQTFPHQSNNDQQR.E                                                 |
| *                 | HsFlag1P_Ti_105.2681.268 | 2.7248 | 0.2163 | 1329.66 | 1329.55 | 7073.1 | 1 1001.6 75 2 K.SIETMEQHLK.Q                                                           |
| *                 | Hs293FLP-MG_Ti_103.162   | 3.7288 | 0.3712 | 2473.97 | 2474.6  | 5045.2 | 1 410.7 40.9 1 R.QTTAAELDSHTPALEQQTTSSEK.T                                             |
| *                 | HsHeLa_Control_Ti_106.31 | 4.8952 | 0.3221 | 1736.8  | 1734.95 | 5655.3 | 1 1639.4 80 6 K.RTAASVLNNFIESPSK.L                                                     |
| *                 | HsFlag1P_Ti_103.2781.278 | 3.4165 | 0.2424 | 1578.13 | 1578.76 | 6943.8 | 1 987.3 60.7 1 R.TAASVLNNFIESPSK.L                                                     |
| gi 24308127 ref N | 4                        | 8      | 0.081  | 793     | 91080   | 7.2 U  | DnaJ (Hsp40) homolog, subfamily C, member 10 [Homo sapiens]                            |
| *                 | HsHeLa_Control-MG_Ti_20  | 3.1486 | 0.2846 | 1438.32 | 1438.54 | 7253.2 | 1 757 66.7 1 K.NPNNPNAHGDFLK.I                                                         |
| *                 | HsFLAG-Control_293_Ti_2( | 3.8774 | 0.4579 | 2075.94 | 2075.24 | 6976.1 | 1 920 59.4 2 R.YDFGIYDDDPEIITLER.R                                                     |
| *                 | HsFLAG-Control_293_Ti_2( | 3.3401 | 0.1685 | 1336.29 | 1335.54 | 9838.7 | 3 1231.8 72.7 1 K.NSILFLNSLDAK.E                                                       |
| *                 | HsFLAG-Control_293_Ti_2( | 4.1403 | 0.259  | 2465.51 | 2465.81 | 5535.4 | 1 541 42.9 4 R.IWGLGFLPQVSTDLTPQTFSEK.V                                                |
| gi 4502801 ref NF | 2                        | 2      | 0.081  | 421     | 44969   | 7.5 U  | regulator of chromosome condensation 1 [Homo sapiens]                                  |
| *                 | HsHeLa3_Ti_103.2715.271  | 2.6525 | 0.2545 | 1639.82 | 1639.01 | 7515.7 | 2 751.5 57.1 1 K.SMVPVQVQLDVPVVK.V                                                     |
| *                 | HsHeLa3_Ti_105.2023.202  | 2.7806 | 0.2671 | 1839.68 | 1838.08 | 6009.9 | 1 413.4 41.7 1 R.LPAVSSVACGASVGYAVTK.D                                                 |
| gi 14150147 ref N | 1                        | 2      | 0.081  | 211     | 23338   | 8.9 U  | syndesmos [Homo sapiens]                                                               |
| *                 | HsFLAG-MOCK_300mM_T      | 3.15   | 0.4962 | 1756.25 | 1757    | 6663   | 1 714.1 56.2 2 R.VGGFPNFLSNAFVSTAK.C                                                   |
| gi 4503297 ref NF | 6                        | 9      | 0.08   | 1279    | 142069  | 6.6 U  | DEAH (Asp-Glu-Ala-His) box polypeptide 9 isoform 1 [Homo sapiens]                      |
| *                 | Hs293FLP_TREX_Ti_102.2   | 2.7751 | 0.1767 | 1026.09 | 1026.18 | 5912.3 | 2 1059.9 92.9 1 R.DFVNYLVR.I                                                           |
| *                 | Hs293FLP_TREX_Ti_103.1   | 3.3973 | 0.3654 | 1289.21 | 1289.48 | 6302.8 | 1 1251 77.3 1 K.LAAQSCALSLVR.Q                                                         |
| *                 | Hs293FLP-MG_Ti_206.028   | 4.1024 | 0.2963 | 4329.45 | 4329.94 | 6369.7 | 2 466.1 20.4 1 .L                                                                      |
| *                 | HsHeLa_Control-MG_Ti_20  | 3.4244 | 0.2824 | 2051.25 | 2051.26 | 5498.6 | 1 628.4 59.4 4 K.TTQVPQFILDDFIQNDR.A                                                   |
| *                 | HsFLAG-Control_HeLa_NE   | 2.9093 | 0.1242 | 1088.14 | 1088.25 | 7477.5 | 1 1086.7 83.3 1 R.RISAVSVAER.V                                                         |
| *                 | Hs293FLP-MG_Ti_202.283   | 3.9397 | 0.251  | 1742.61 | 1742.88 | 6773.9 | 1 1576.1 70 1 R.ELDALDANDELTPLR.I                                                      |
| gi 4505621 ref NF | 1                        | 2      | 0.08   | 187     | 21057   | 7.5 U  | prostatic binding protein [Homo sapiens]                                               |
| *                 | Hs293FLP_TREX_Ti_105.2   | 3.0242 | 0.3376 | 1689.19 | 1689.95 | 5086.1 | 1 717 64.3 2 K.LYTLVLTDPDAPSRK.D                                                       |
| gi 15187164 ref N | 1                        | 2      | 0.08   | 138     | 14246   | 5.5 U  | lacritin precursor [Homo sapiens]                                                      |
| *                 | HsFlag1P_Ti_103.2350.235 | 3.5288 | 0.1826 | 1187.24 | 1187.42 | 6501.6 | 2 1527.1 85 2 K.SILLTEQALAK.A                                                          |
| gi 61837501 ref N | 3                        | 4      | 0.079  | 781     | 82893   | 5.6 U  | sine oculis homeobox homolog 4 [Homo sapiens]                                          |
| *                 | HsHeLa3_Ti_104.3451.345  | 2.8802 | 0.1714 | 1476.75 | 1475.73 | 3279.8 | 1 594.8 77.3 1 R.FLWSLPQSDLLR.G                                                        |
| *                 | HsHeLa3_Ti_102.3262.326  | 3.7403 | 0.4786 | 2485.52 | 2485.78 | 8049.8 | 1 736.2 41.3 2 K.MSSNIVSNGISMTDILGSTSQDVK.E                                            |
| *                 | HsHeLa3_Ti_104.3157.316  | 3.4384 | 0.2235 | 2636.72 | 2637.05 | 4197.4 | 1 331.2 36 1 K.VFLSSLAPS AVVYTPNTGQTIGSVK.Q                                            |
| gi 24432016 ref N | 2                        | 6      | 0.079  | 471     | 52050   | 8 U    | pre-mRNA cleavage factor I, 59 kDa subunit [Homo sapiens]                              |
| *                 | HsHeLa3_Ti_104.2313.231  | 3.005  | 0.2277 | 1355.41 | 1355.58 | 5001.2 | 5 656.7 63.6 1 K.TPAILYTYSGLR.N                                                        |
| *                 | HsHeLa3_Ti_105.5110.511  | 5.3394 | 0.4581 | 2437.88 | 2437.75 | 6636.8 | 1 1459.6 52.1 5 K.AVSGASAGDYSDAIETLLTAIAVIK.Q                                          |
| gi 38044288 ref N | 3                        | 6      | 0.078  | 731     | 80641   | 5.8 U  | gelsolin isoform b [Homo sapiens]                                                      |
| gi 4504165 ref NF | 3                        | 6      | 0.073  | 782     | 85697   | 6.3 U  | gelsolin isoform a [Homo sapiens]                                                      |
| *                 | HsFLAG-Control_Hela_Ti_1 | 2.7419 | 0.1592 | 1831.44 | 1831.08 | 5078.8 | 1 449.7 53.1 2 K.QTQVSVLPEGGETPLFK.Q                                                   |
| *                 | HsFLAG-Control_Hela_Ti_1 | 3.9275 | 0.3704 | 1838.53 | 1839.01 | 6971.1 | 1 884.3 55.9 1 K.TPSAAYLWVGTGASEAEK.T                                                  |
| *                 | HsFLAG-Control_HeLa_S1(  | 4.6507 | 0.432  | 2273.32 | 2273.46 | 5838.2 | 1 1059.5 57.1 3 R.AQPVQVAEGSEPDGFWEALGGK.A                                             |
| gi 68563515 ref N | 2                        | 4      | 0.078  | 579     | 64136   | 8.3 U  | hypothetical protein LOC448834 [Homo sapiens]                                          |
| *                 | HsFLAG-Control_293_Ti_1( | 4.273  | 0.375  | 2505.86 | 2504.56 | 9219   | 1 891.3 45 3 R.FSTQCQYQGSYSSCGPQFQSR.A                                                 |
| *                 | HsFLAG-Control_Hela_Ti_1 | 2.6643 | 0.3013 | 2790.87 | 2790.9  | 8983.5 | 1 394 30.4 1 R.TSFSPCVPQCQTQGSYGSFTEQHR.S                                              |
| gi 4507847 ref NF | 2                        | 4      | 0.078  | 346     | 36955   | 5.1 U  | upstream stimulatory factor 2 isoform 1 [Homo sapiens]                                 |
| gi 46877105 ref N | 2                        | 4      | 0.097  | 279     | 30570   | 5.2 U  | upstream stimulatory factor 2 isoform 2 [Homo sapiens]                                 |
| *                 | HsHeLa3_Ti_104.2457.245  | 3.9063 | 0.2217 | 1217.48 | 1215.44 | 6496.8 | 1 1282.8 88.9 3 K.INNWIVQLSK.I                                                         |
| *                 | HsHeLa3_Ti_105.1582.158  | 3.5081 | 0.3069 | 1940.52 | 1940.14 | 5651.3 | 1 634.4 53.1 1 R.AQLQQHNLEMVGEGRQ.-                                                    |
| gi 88942850 ref X | 2                        | 3      | 0.078  | 294     | 32601   | 4.8 U  | PREDICTED: similar to 40S ribosomal protein SA (p40) (34/67 kDa laminin receptor) (Col |

|                    |                          |        |        |         |         |         |                                                                                        |                                                                                         |
|--------------------|--------------------------|--------|--------|---------|---------|---------|----------------------------------------------------------------------------------------|-----------------------------------------------------------------------------------------|
| gi 89036252 ref X  | 2                        | 3      | 0.078  | 295     | 32744   | 4.5 U   | PREDICTED: similar to 40S ribosomal protein SA (p40) (34/67 kDa laminin receptor) (Col |                                                                                         |
| gi 88951517 ref X  | 2                        | 3      | 0.078  | 294     | 32601   | 4.8 U   | PREDICTED: similar to 40S ribosomal protein SA (p40) (34/67 kDa laminin receptor) (Col |                                                                                         |
| gi 88951515 ref X  | 2                        | 3      | 0.078  | 294     | 32601   | 4.8 U   | PREDICTED: similar to 40S ribosomal protein SA (p40) (34/67 kDa laminin receptor) (Col |                                                                                         |
| gi 88951513 ref X  | 2                        | 3      | 0.078  | 294     | 32601   | 4.8 U   | PREDICTED: similar to 40S ribosomal protein SA (p40) (34/67 kDa laminin receptor) (Col |                                                                                         |
| gi 88951511 ref X  | 2                        | 3      | 0.078  | 294     | 32601   | 4.8 U   | PREDICTED: similar to 40S ribosomal protein SA (p40) (34/67 kDa laminin receptor) (Col |                                                                                         |
| gi 88951507 ref X  | 2                        | 3      | 0.078  | 294     | 32601   | 4.8 U   | PREDICTED: similar to 40S ribosomal protein SA (p40) (34/67 kDa laminin receptor) (Col |                                                                                         |
| gi 88951505 ref X  | 2                        | 3      | 0.078  | 294     | 32601   | 4.8 U   | PREDICTED: similar to 40S ribosomal protein SA (p40) (34/67 kDa laminin receptor) (Col |                                                                                         |
| gi 88942860 ref X  | 2                        | 3      | 0.078  | 294     | 32601   | 4.8 U   | PREDICTED: similar to 40S ribosomal protein SA (p40) (34/67 kDa laminin receptor) (Col |                                                                                         |
| gi 88942858 ref X  | 2                        | 3      | 0.078  | 294     | 32601   | 4.8 U   | PREDICTED: similar to 40S ribosomal protein SA (p40) (34/67 kDa laminin receptor) (Col |                                                                                         |
| gi 88942856 ref X  | 2                        | 3      | 0.078  | 294     | 32601   | 4.8 U   | PREDICTED: similar to 40S ribosomal protein SA (p40) (34/67 kDa laminin receptor) (Col |                                                                                         |
| gi 88942854 ref X  | 2                        | 3      | 0.078  | 294     | 32601   | 4.8 U   | PREDICTED: similar to 40S ribosomal protein SA (p40) (34/67 kDa laminin receptor) (Col |                                                                                         |
|                    | Hs293FLP_TREX_Ti_102.2   | 3.1804 | 0.1068 | 1136.19 | 1136.33 | 3788.9  | 2 847.8 83.3 1 K.SDGIYIINLK.R                                                          |                                                                                         |
|                    | HsFLAG-Control_MG_293_   | 4.1115 | 0.3213 | 1204.29 | 1204.37 | 7835.3  | 1 1714.7 83.3 2 K.FAAATGATPIAGR.F                                                      |                                                                                         |
| gi 4505185 ref NF  |                          | 1      | 6      | 0.078   | 115     | 12476   | 7.9 U                                                                                  | macrophage migration inhibitory factor (glycosylation-inhibiting factor) [Homo sapiens] |
| *                  | Hs293FLP_TREX_Ti_104.2   | 3.5441 | 0.1792 | 1045.32 | 1045.23 | 4540.1  | 1 1074.5 93.8 6 K.LLCGLLAER.L                                                          |                                                                                         |
| gi 58530840 ref NF |                          | 12     | 25     | 0.077   | 2871    | 331774  | 6.8 U                                                                                  | desmoplakin isoform I [Homo sapiens]                                                    |
| gi 58530842 ref NF |                          | 12     | 25     | 0.097   | 2272    | 260116  | 7 U                                                                                    | desmoplakin isoform II [Homo sapiens]                                                   |
|                    | HsFLAG-Control_Hela_Ti_1 | 3.7795 | 0.304  | 1842.98 | 1843.04 | 10605.4 | 1 1486.2 64.3 2 K.SAIYQLEEEYENLLK.A                                                    |                                                                                         |
|                    | HsFLAG-Control_HeLa_S10  | 2.9961 | 0.1606 | 1273.26 | 1272.45 | 6219.4  | 2 891.2 80 2 R.QLQNIQATSR.E                                                            |                                                                                         |
|                    | HsFLAG-Control_Hela_Ti_1 | 4.1787 | 0.4713 | 2386.68 | 2387.56 | 9872.2  | 1 887.1 44.7 1 K.ENAAYFQFFEEAQSTEAYLK.G                                                |                                                                                         |
|                    | HsFLAG-Control_Hela_Ti_1 | 2.9956 | 0.425  | 1717.41 | 1717.92 | 7983.6  | 1 739.5 60 1 K.NLPLADQGSSHHITVK.I                                                      |                                                                                         |
|                    | HsFLAG-Control_Hela_Ti_1 | 3.05   | 0.2374 | 1857.17 | 1858.06 | 9934    | 4 699.2 46.9 1 K.SVQNDSQAIAEVLNQLK.D                                                   |                                                                                         |
|                    | HsFLAG-Control_Hela_Ti_1 | 3.9404 | 0.4311 | 2138.51 | 2139.34 | 10148.2 | 1 888 50 1 K.LENINGVTDGYLNSLCTVR.A                                                     |                                                                                         |
|                    | HsFLAG-Control_Hela_Ti_1 | 5.0684 | 0.4567 | 2434.4  | 2434.67 | 8275.5  | 1 1180.1 52.5 2 K.AQQIHSQTSQQYPLYDLDLGK.F                                              |                                                                                         |
|                    | HsFLAG-Control_293_Ti_10 | 4.7702 | 0.4362 | 2482.73 | 2482.83 | 12718   | 1 1681 50 3 K.DYELQLASYTSGLETLLNIPIK.R                                                 |                                                                                         |
|                    | HsFLAG-Control_Hela_Ti_1 | 4.731  | 0.4141 | 2254.64 | 2254.63 | 8552.9  | 1 919 45.2 2 R.LLEAQIASGGVDPVNSVFLPK.D                                                 |                                                                                         |
|                    | HsHeLa3_Ti_103.3755.375  | 2.6849 | 0.1403 | 2385.37 | 2384.67 | 6480.9  | 3 417 38.1 1 R.AVTGYNDPETGNIISLFQAMNK.E                                                |                                                                                         |
|                    | HsFLAG-Control_HeLa_S10  | 4.371  | 0.2559 | 2160.73 | 2160.25 | 8171.1  | 1 770.3 47.2 4 R.GYFNEELSEILSDPSSDDTK.G                                                |                                                                                         |
|                    | HsFLAG-Control_Hela_Ti_1 | 4.5616 | 0.4676 | 2029.48 | 2030.24 | 9966.6  | 1 1840.6 65.6 5 K.GFFDPNTEENLTYLQLK.E                                                  |                                                                                         |
| gi 22027538 ref NF |                          | 3      | 6      | 0.077   | 868     | 96023   | 6.5 U                                                                                  | programmed cell death 6 interacting protein [Homo sapiens]                              |
| *                  | HsFLAG-Control_HeLa_S10  | 3.7045 | 0.228  | 3409.4  | 3410.84 | 6797.7  | 2 434.5 22 1 R.EATTLANGVLASLNLPAIIEDVSGDTPVQSILTK.S                                    |                                                                                         |
| *                  | HsFLAG-Control_HeLa_S10  | 4.6625 | 0.3441 | 1728.63 | 1728.98 | 7060.6  | 1 1995 76.7 2 R.SVIEQGGIQTVDQLIK.E                                                     |                                                                                         |
| *                  | HsFLAG-Control_HeLa_S10  | 4.8948 | 0.499  | 1895.9  | 1896.15 | 7597.1  | 1 1729.5 68.8 3 K.NLATAYDNFVELVANLK.E                                                  |                                                                                         |
| gi 28212272 ref NF |                          | 2      | 2      | 0.077   | 636     | 69438   | 7.3 U                                                                                  | hypothetical protein LOC161424 [Homo sapiens]                                           |
| *                  | HsFLAG-Control_HeLa_NE   | 4.4208 | 0.3336 | 1630.49 | 1629.89 | 6423.1  | 1 1179.8 71.4 1 R.TLLQVLGGTILESER.A                                                    |                                                                                         |
| *                  | HsFLAG-Control_HeLa_NE   | 5.7145 | 0.4057 | 3358.44 | 3359.85 | 6801.1  | 1 918.7 28 1 R.SLGALTGPQLLSLAQSPAGSHVLDAILTSPSVTR.K                                    |                                                                                         |
| gi 7657015 ref NF  |                          | 3      | 4      | 0.077   | 505     | 55210   | 7.2 U                                                                                  | hypothetical protein LOC51493 [Homo sapiens]                                            |
| *                  | HsFLAG-Control_MG_293_   | 3.3957 | 0.264  | 1385.29 | 1386.5  | 10073.2 | 1 1157 75 2 R.SYNDELQFLEK.I                                                            |                                                                                         |
| *                  | HsFLAG-Control_MG_293_   | 3.1328 | 0.249  | 1090.78 | 1091.31 | 4943.3  | 1 796.1 72.7 1 R.GGGVGGFLPAMK.Q                                                        |                                                                                         |
| *                  | HsHeLa3_Ti_105.2179.217  | 3.4567 | 0.2256 | 1642.8  | 1640.9  | 6215    | 1 1044.5 63.3 1 R.GLGHQVATDALVAMEK.A                                                   |                                                                                         |
| gi 33469922 ref NF |                          | 3      | 3      | 0.076   | 543     | 60643   | 6.3 U                                                                                  | minichromosome maintenance protein 7 isoform 2 [Homo sapiens]                           |
| gi 33469968 ref NF |                          | 3      | 3      | 0.057   | 719     | 81308   | 6.5 U                                                                                  | minichromosome maintenance protein 7 isoform 1 [Homo sapiens]                           |
|                    | HsFLAG-Control_HeLa_S10  | 3.0362 | 0.2881 | 1553.51 | 1551.87 | 5892.8  | 1 812.7 64.3 1 K.ALLLLLGGVDQSPR.G                                                      |                                                                                         |
|                    | HsFLAG-Control_MG_293_   | 2.9509 | 0.218  | 1188.33 | 1188.37 | 7492    | 1 1469.5 75 1 R.GSSGVGLTAAVLR.D                                                        |                                                                                         |
|                    | HsHeLa_Control-MG_Ti_20  | 2.7134 | 0.1683 | 1475.5  | 1474.7  | 6884    | 1 680.1 58.3 1 R.TQRPADVIFATVR.E                                                       |                                                                                         |
| gi 5174529 ref NF  |                          | 2      | 3      | 0.076   | 395     | 43661   | 6.5 U                                                                                  | methionine adenosyltransferase II, alpha [Homo sapiens]                                 |
| *                  | HsFLAG-Control_MG_293_   | 2.7446 | 0.1402 | 1809.88 | 1807.96 | 6744.5  | 1 373 46.4 1 K.YLDEDTIYHLQPSGR.F                                                       |                                                                                         |
| *                  | HsFLAG-Control_MG_293_   | 4.2203 | 0.3116 | 1445.48 | 1445.62 | 7492.1  | 1 1834.1 78.6 2 R.FVIGGPQGDAGLTGR.K                                                    |                                                                                         |
| gi 4885403 ref NF  |                          | 11     | 22     | 0.075   | 1938    | 198471  | 7.3 U                                                                                  | host cell factor C1 (VP16-accessory protein) [Homo sapiens]                             |

|                    |                         |        |        |         |         |        |   |        |      |                                                                          |
|--------------------|-------------------------|--------|--------|---------|---------|--------|---|--------|------|--------------------------------------------------------------------------|
| *                  | HsFLAG-Control_HeLa_NE  | 2.5478 | 0.3359 | 1158.51 | 1159.33 | 5521.4 | 1 | 534.8  | 65   | 1 R.LGHSFSLVGNK.C                                                        |
| *                  | HsFLAG-Control_HeLa_NE  | 2.6021 | 0.1402 | 1264.04 | 1264.38 | 6867.7 | 1 | 751.2  | 70   | 1 R.ESHTAVVYTEK.D                                                        |
| *                  | HsHeLa3_Ti_106.1832.183 | 2.7788 | 0.3763 | 1129.5  | 1129.26 | 5104.7 | 1 | 523.1  | 65   | 5 R.SLHSATTIGNK.M                                                        |
| *                  | HsHeLa3_Ti_104.2276.227 | 2.564  | 0.1791 | 1813.26 | 1813.06 | 4843.8 | 7 | 268.7  | 42.9 | 1 K.DLWYLETEKPPPPAR.V                                                    |
| *                  | HsFLAG-Control_HeLa_NE  | 4.257  | 0.4319 | 1598.94 | 1597.85 | 2957.6 | 3 | 325.2  | 56.2 | 5 K.SPISVPGGSALISNLGK.V                                                  |
| *                  | HsFLAG-Control_HeLa_NE  | 3.9996 | 0.4386 | 1636.68 | 1636.89 | 9739.5 | 1 | 1591.5 | 66.7 | 2 K.IATGHGQQGVTVVVK.G                                                    |
| *                  | HsHeLa3_Ti_105.2251.225 | 2.6215 | 0.2337 | 1345.46 | 1345.58 | 8858.5 | 2 | 661.6  | 54.2 | 1 R.SPAFVQLAPLSSK.V                                                      |
| *                  | HsFLAG-Control_HeLa_NE  | 3.8013 | 0.2432 | 1345.88 | 1345.58 | 9628.7 | 2 | 1288.7 | 66.7 | 2 R.SPAFVQLAPLSSK.V                                                      |
| *                  | HsFLAG-MOCK_300mM_T     | 2.6673 | 0.2537 | 1268.68 | 1269.42 | 4144.1 | 1 | 300.6  | 63.6 | 1 R.HSHAVSTAAMTR.S                                                       |
| *                  | HsFLAG-Control_HeLa_NE  | 3.7321 | 0.3673 | 2915.42 | 2915.36 | 7513.1 | 1 | 672.6  | 25   | 1 K.LQAAATLTVANGIESLGVKPDLPSPSK.A                                        |
| *                  | HsFLAG-Control_HeLa_NE  | 3.0056 | 0.201  | 1263.59 | 1263.44 | 9892.6 | 1 | 1241.1 | 80   | 2 K.KQELQPGTAYK.F                                                        |
| gi 4758556 ref NF  |                         | 2      | 3      | 0.075   | 683     | 77529  |   |        |      | PRP3 pre-mRNA processing factor 3 homolog [Homo sapiens]                 |
| *                  | HsHeLa3_Ti_106.2619.261 | 4.0079 | 0.2659 | 2118.95 | 2119.44 | 8259.1 | 1 | 811.1  | 47.4 | 1 K.RVLGFSEPTVVTAAALNCVKG.G                                              |
| *                  | HsHeLa3_Ti_105.2842.284 | 4.1952 | 0.1268 | 3330.64 | 3330.69 | 5792.3 | 1 | 729.3  | 26.7 | 2 K.TPSSSQPERLPIGNTIQPSQAATFMNDAIEK.A                                    |
| gi 24430160 ref NF |                         | 2      | 3      | 0.075   | 389     | 44173  |   |        |      | proteasome 26S ATPase subunit 6 [Homo sapiens]                           |
| *                  | HsFLAG-Control_HeLa_S10 | 3.1322 | 0.1686 | 1441.79 | 1441.71 | 5301.7 | 1 | 953.7  | 73.1 | 1 K.ALQSVGQIVGEVLK.Q                                                     |
| *                  | HsFLAG-Control_HeLa_S10 | 3.9217 | 0.3011 | 1800.18 | 1799.08 | 4754.5 | 1 | 634.5  | 64.3 | 2 R.EVIELPLTNPELFQR.V                                                    |
| gi 4506691 ref NF  |                         | 1      | 6      | 0.075   | 146     | 16445  |   |        |      | ribosomal protein S16 [Homo sapiens]                                     |
| gi 89057335 ref X  |                         | 1      | 6      | 0.075   | 146     | 16412  |   |        |      | PREDICTED: similar to 40S ribosomal protein S16 isoform 6 [Homo sapiens] |
| gi 89057333 ref X  |                         | 1      | 6      | 0.075   | 146     | 16412  |   |        |      | PREDICTED: similar to 40S ribosomal protein S16 isoform 5 [Homo sapiens] |
| gi 89057331 ref X  |                         | 1      | 6      | 0.075   | 146     | 16412  |   |        |      | PREDICTED: similar to 40S ribosomal protein S16 isoform 4 [Homo sapiens] |
| gi 89052405 ref X  |                         | 1      | 6      | 0.075   | 146     | 16412  |   |        |      | PREDICTED: similar to 40S ribosomal protein S16 isoform 3 [Homo sapiens] |
| gi 89052403 ref X  |                         | 1      | 6      | 0.075   | 146     | 16412  |   |        |      | PREDICTED: similar to 40S ribosomal protein S16 isoform 2 [Homo sapiens] |
| gi 88946111 ref X  |                         | 1      | 6      | 0.085   | 129     | 14346  |   |        |      | PREDICTED: similar to 40S ribosomal protein S16 isoform 4 [Homo sapiens] |
| gi 88946109 ref X  |                         | 1      | 6      | 0.075   | 146     | 16448  |   |        |      | PREDICTED: similar to 40S ribosomal protein S16 isoform 3 [Homo sapiens] |
| gi 88942427 ref X  |                         | 1      | 6      | 0.085   | 129     | 14346  |   |        |      | PREDICTED: similar to 40S ribosomal protein S16 isoform 2 [Homo sapiens] |
| gi 88942425 ref X  |                         | 1      | 6      | 0.075   | 146     | 16448  |   |        |      | PREDICTED: similar to 40S ribosomal protein S16 isoform 1 [Homo sapiens] |
| gi 51493358 ref X  |                         | 1      | 6      | 0.075   | 146     | 16412  |   |        |      | PREDICTED: similar to 40S ribosomal protein S16 isoform 1 [Homo sapiens] |
| gi 15553127 ref NF | Hs293FLP_TREX_Ti_105.2  | 3.6945 | 0.3515 | 1188.38 | 1188.37 | 5581.1 | 1 | 995.5  | 75   | 6 K.GPLQSVQVFGK                                                          |
| *                  |                         | 5      | 10     | 0.074   | 917     | 102380 |   |        |      | hexokinase 2 [Homo sapiens]                                              |
| *                  | HsHeLa3_Ti_106.1874.187 | 2.7795 | 0.2992 | 1223.64 | 1224.4  | 4854.6 | 4 | 479.5  | 58.3 | 2 K.GLGATTHPTAAVK.M                                                      |
| *                  | HsHeLa3_Ti_106.1875.187 | 3.0395 | 0.2543 | 1224.03 | 1224.4  | 6365.5 | 1 | 1076.4 | 75   | 1 K.GLGATTHPTAAVK.M                                                      |
| *                  | HsHeLa3_Ti_104.2899.289 | 4.2086 | 0.3748 | 1532.84 | 1532.75 | 9906.9 | 1 | 1746.1 | 67.9 | 2 R.SASLCAATLAAVLQR.I                                                    |
| *                  | HsHeLa3_Ti_103.3107.310 | 5.2043 | 0.3815 | 1498.67 | 1496.66 | 7210.9 | 1 | 2027.1 | 80.8 | 3 K.GDFLALDLGGTNFR.V                                                     |
| *                  | HsHeLa3_Ti_104.4323.432 | 3.4035 | 0.2413 | 2900.68 | 2899.28 | 3540.2 | 1 | 247.3  | 34   | 2 K.GVSLPLGFTFSFPCQQNSLDESILLK.W                                         |
| gi 20070260 ref NF |                         | 2      | 2      | 0.074   | 580     | 65697  |   |        |      | cofactor of BRCA1 [Homo sapiens]                                         |
| gi 89030627 ref X  |                         | 2      | 2      | 0.074   | 579     | 65326  |   |        |      | PREDICTED: similar to cofactor of BRCA1 [Homo sapiens]                   |
|                    | HsFLAG-Control_HeLa_NE  | 3.802  | 0.3065 | 3294.78 | 3293.75 | 8988.4 | 1 | 600.6  | 22.4 | 1 K.AIEQFQTENGVLPLSLQSAALPFLDLHGTPR.L                                    |
|                    | HsFLAG-Control_HeLa_NE  | 2.5966 | 0.111  | 1287.41 | 1287.41 | 4908.6 | 2 | 632.9  | 66.7 | 1 K.ALEPTGQSGEAVK.E                                                      |
| gi 4503735 ref NF  |                         | 3      | 4      | 0.074   | 553     | 56788  |   |        |      | forkhead box C1 [Homo sapiens]                                           |
| *                  | HsHeLa3_Ti_104.1443.144 | 2.4082 | 0.3215 | 1346.51 | 1347.51 | 5772.9 | 1 | 392.7  | 54.5 | 1 R.AYGPYTPQPQPK.D                                                       |
| *                  | HsHeLa3_Ti_104.1445.144 | 3.478  | 0.3435 | 1348.55 | 1347.51 | 4054.9 | 1 | 583    | 72.7 | 2 R.AYGPYTPQPQPK.D                                                       |
| *                  | HsHeLa3_Ti_105.2091.209 | 2.623  | 0.3911 | 2733.72 | 2734.99 | 9229.7 | 1 | 822    | 37.5 | 1 K.TENGTCPSPQPLSPAALGSGSAAAVPK.I                                        |
| gi 14141170 ref NF |                         | 3      | 7      | 0.073   | 668     | 75023  |   |        |      | metastasis-associated protein 2 [Homo sapiens]                           |
| *                  | HsFLAG-Control_HeLa_NE  | 3.7852 | 0.3314 | 2110.17 | 2110.29 | 8535.4 | 1 | 832.4  | 50   | 1 R.VGDYVYFENSSSNPYLVR.R                                                 |
| *                  | HsFLAG-Control_HeLa_NE  | 4.3773 | 0.4145 | 1551.63 | 1550.62 | 9493.1 | 2 | 882.4  | 57.1 | 4 R.DISSLNSLADSNAR.E                                                     |
| *                  | HsFLAG-Control_HeLa_NE  | 3.083  | 0.3131 | 1654.92 | 1653.92 | 4428.4 | 3 | 385.9  | 53.3 | 2 K.LNPADAPNPVVFVATK.D                                                   |
| gi 13128860 ref NF |                         | 2      | 2      | 0.073   | 482     | 55103  |   |        |      | histone deacetylase 1 [Homo sapiens]                                     |
|                    | HsHeLa3_Ti_104.1499.149 | 2.5627 | 0.0945 | 1428.9  | 1427.57 | 6387.6 | 4 | 437.4  | 54.5 | 1 R.SIRPDNMSEYSK.Q                                                       |

|                   |                          |        |        |         |         |         |      |        |      |   |                                                                |
|-------------------|--------------------------|--------|--------|---------|---------|---------|------|--------|------|---|----------------------------------------------------------------|
| *                 | HsHeLa3_Ti_103.2998.299  | 4.4707 | 0.2773 | 2515.2  | 2514.79 | 4745.4  | 1    | 661.9  | 47.7 | 1 | K.VMEMFQPSAVVLQCGSDSLSGDR.L                                    |
| gi 42657272 ref X |                          | 1      | 2      | 0.073   | 124     | 13614   | 10.1 | U      |      |   | PREDICTED: similar to 40S ribosomal protein S25 [Homo sapiens] |
| gi 88988836 ref X |                          | 1      | 2      | 0.073   | 124     | 13615   | 10   | U      |      |   | PREDICTED: similar to 40S ribosomal protein S25 [Homo sapiens] |
| gi 4506707 ref NF |                          | 1      | 2      | 0.072   | 125     | 13742   | 10.1 | U      |      |   | ribosomal protein S25 [Homo sapiens]                           |
|                   | Hs293FLP_TREX_Ti_102.2   | 3.5568 | 0.2179 | 1076.41 | 1076.28 | 6849.2  | 6    | 1143.9 | 87.5 | 2 | K.LNNLVLFDK.A                                                  |
| gi 4759196 ref NF |                          | 3      | 5      | 0.072   | 1142    | 126500  | 6.4  | U      |      |   | sympleskin [Homo sapiens]                                      |
| *                 | HsFLAG-Control_HeLa_NE   | 3.8073 | 0.504  | 1839.02 | 1839.18 | 6730.2  | 1    | 1182.2 | 65.6 | 2 | K.VVLEAPLITESALEVVR.K                                          |
| *                 | HsFLAG-Control_HeLa_NE   | 5.1041 | 0.2405 | 3308.92 | 3309.75 | 13148.2 | 1    | 1307.1 | 25.8 | 1 | R.LLGTQHGEGNSALSPLNPGELLIALHNIDSVK.C                           |
| *                 | HsFLAG-Control_HeLa_NE   | 3.6879 | 0.356  | 3460.12 | 3460.91 | 5997.8  | 5    | 290.2  | 18.8 | 2 | K.EAPAGPLEEDDLEPLTLAPAPAPRPPQDLIGLR.L                          |
| gi 33519426 ref N |                          | 1      | 5      | 0.072   | 499     | 54604   | 6.5  | U      |      |   | thioredoxin reductase 1 [Homo sapiens]                         |
| gi 33519432 ref N |                          | 1      | 5      | 0.072   | 499     | 54604   | 6.5  | U      |      |   | thioredoxin reductase 1 [Homo sapiens]                         |
| gi 33519430 ref N |                          | 1      | 5      | 0.072   | 499     | 54604   | 6.5  | U      |      |   | thioredoxin reductase 1 [Homo sapiens]                         |
| gi 33519428 ref N |                          | 1      | 5      | 0.072   | 499     | 54604   | 6.5  | U      |      |   | thioredoxin reductase 1 [Homo sapiens]                         |
|                   | HsGST-MOCK_Ti_403.499    | 6.1725 | 0.4345 | 3971.6  | 3972.48 | 6307.1  | 1    | 913.5  | 25.7 | 5 | K.IPVTDDEEQTNVPYIYAIGDILEDKVELTPVAIQAGR.L                      |
| gi 21361547 ref N |                          | 2      | 3      | 0.072   | 461     | 49974   | 4.8  | U      |      |   | ribonuclease/angiogenin inhibitor [Homo sapiens]               |
| gi 42822874 ref N |                          | 2      | 3      | 0.072   | 461     | 49974   | 4.8  | U      |      |   | ribonuclease/angiogenin inhibitor [Homo sapiens]               |
| gi 42822872 ref N |                          | 2      | 3      | 0.072   | 461     | 49974   | 4.8  | U      |      |   | ribonuclease/angiogenin inhibitor [Homo sapiens]               |
| gi 42822870 ref N |                          | 2      | 3      | 0.072   | 461     | 49974   | 4.8  | U      |      |   | ribonuclease/angiogenin inhibitor [Homo sapiens]               |
| gi 42822868 ref N |                          | 2      | 3      | 0.072   | 461     | 49974   | 4.8  | U      |      |   | ribonuclease/angiogenin inhibitor [Homo sapiens]               |
| gi 42822866 ref N |                          | 2      | 3      | 0.072   | 461     | 49974   | 4.8  | U      |      |   | ribonuclease/angiogenin inhibitor [Homo sapiens]               |
| gi 42822864 ref N |                          | 2      | 3      | 0.072   | 461     | 49974   | 4.8  | U      |      |   | ribonuclease/angiogenin inhibitor [Homo sapiens]               |
| gi 42794608 ref N |                          | 2      | 3      | 0.072   | 461     | 49974   | 4.8  | U      |      |   | ribonuclease/angiogenin inhibitor [Homo sapiens]               |
|                   | HsFLAG-Control_HeLa_S10  | 3.0873 | 0.3173 | 1210.42 | 1210.42 | 7806.4  | 1    | 1229.2 | 80   | 2 | R.VNPALAEINLR.S                                                |
|                   | Hs293FLP-MG_Ti_202.467   | 3.4251 | 0.259  | 2417.03 | 2416.66 | 9331.6  | 9    | 502.8  | 35.7 | 1 | R.ELDLSNNCLGDAGILQLVESVR.Q                                     |
| gi 63252913 ref N |                          | 2      | 6      | 0.072   | 348     | 38499   | 6.2  | U      |      |   | gelsolin-like capping protein [Homo sapiens]                   |
| *                 | HsFLAG-Control_HeLa_NE   | 2.7225 | 0.2183 | 1319.52 | 1318.34 | 6728.8  | 2    | 502.9  | 59.1 | 1 | K.EGNPEEDLTADK.A                                               |
| *                 | HsFLAG-Control_HeLa_NE   | 4.2956 | 0.3567 | 1390.89 | 1390.58 | 6579.1  | 1    | 1281.7 | 83.3 | 5 | R.QAALQVAEGFISR.M                                              |
| gi 88953910 ref X |                          | 7      | 13     | 0.07    | 2354    | 265615  | 6.2  | U      |      |   | PREDICTED: hypothetical protein LOC57683 [Homo sapiens]        |
| gi 88959048 ref X |                          | 7      | 13     | 0.07    | 2354    | 265615  | 6.2  | U      |      |   | PREDICTED: hypothetical protein LOC57683 [Homo sapiens]        |
|                   | Hs293FLP-MG_Ti_204.255   | 3.5083 | 0.2348 | 2712.2  | 2712.07 | 6429.8  | 1    | 674.4  | 29.2 | 1 | K.SVFETSLDSDVPLQAATHKPEVIVK.E                                  |
|                   | HsF-IP-293-MG_Ti_105.167 | 3.5474 | 0.39   | 2229.1  | 2229.45 | 4544.6  | 1    | 717.2  | 50   | 1 | K.TSLDSGVPHYSVTEPQVAVNK.I                                      |
|                   | Hs293FLP-MG_Ti_202.405   | 4.535  | 0.3762 | 2424.58 | 2422.78 | 6746.1  | 1    | 962.1  | 52.4 | 6 | K.GYVPSDSEIIVSNIPLQSVIK.Q                                      |
|                   | Hs283FLP_Ti_106.2520.25  | 4.3933 | 0.2318 | 2839.6  | 2837.16 | 7704    | 1    | 820.1  | 30   | 1 | K.LGDFDVSYASHIPVQFVTDQSSVPVK.E                                 |
|                   | Hs283FLP_Ti_103.3724.37  | 3.7457 | 0.2539 | 3695.02 | 3694.21 | 6792.4  | 2    | 412.6  | 22   | 1 | K.VVLVDLVPGDSYEVISDDIPLQLVTDPPQLTVK.D                          |
|                   | Hs293FLP-MG_Ti_202.004   | 5.1022 | 0.4431 | 1589.66 | 1589.62 | 9269.8  | 1    | 1871.7 | 70   | 2 | K.SCQSSASAVDFGASSK.S                                           |
|                   | Hs293FLP-MG_Ti_203.222   | 3.3773 | 0.3637 | 2233.87 | 2234.34 | 9218.8  | 1    | 549.3  | 42.1 | 1 | R.YGFNSHQGTSDSSFLFEESK.V                                       |
| gi 12056468 ref N |                          | 5      | 19     | 0.07    | 745     | 81745   | 6.1  | U      |      |   | junction plakoglobin [Homo sapiens]                            |
| gi 4504811 ref NF |                          | 5      | 19     | 0.07    | 745     | 81745   | 6.1  | U      |      |   | junction plakoglobin [Homo sapiens]                            |
|                   | HsFLAG-Control_Hela_Ti_1 | 3.701  | 0.0831 | 1450.59 | 1450.72 | 4773.4  | 1    | 766.6  | 77.3 | 2 | K.LLNQPNQWPLVK.A                                               |
|                   | HsFLAG-Control_293_Ti_10 | 3.2337 | 0.3304 | 2158.16 | 2156.46 | 9620.9  | 3    | 402.6  | 36.8 | 4 | R.NLALCPANHAPLQEAIVIPR.L                                       |
|                   | HsFLAG-Control_Hela_Ti_1 | 4.3959 | 0.4513 | 2347.65 | 2348.75 | 6641.8  | 1    | 634.5  | 44.7 | 6 | R.LNTIPLFVQLLYSSVENIQR.V                                       |
|                   | HsFLAG-Control_HeLa_S10  | 4.6279 | 0.2776 | 2349.62 | 2348.75 | 8343.6  | 1    | 1284.8 | 40.8 | 3 | R.LNTIPLFVQLLYSSVENIQR.V                                       |
|                   | HsFLAG-Control_293_Ti_10 | 5.257  | 0.4227 | 2350.36 | 2348.75 | 7476    | 1    | 1219.6 | 57.9 | 4 | R.LNTIPLFVQLLYSSVENIQR.V                                       |
| gi 46411166 ref N |                          | 2      | 2      | 0.07    | 388     | 41817   | 8.9  | U      |      |   | muscleblind-like 1 isoform c [Homo sapiens]                    |
| *                 | HsHeLa3_Ti_103.2827.282  | 6.8135 | 0.509  | 2606.37 | 2607.9  | 9899.6  | 1    | 2411.9 | 53.8 | 1 | K.AAQYQVNQAAAAQAAATAAAMTQSAVK.S                                |
| *                 | HsHeLa3_Ti_103.2814.281  | 5.9053 | 0.4002 | 2609.53 | 2607.9  | 8250.7  | 1    | 2650.4 | 40.4 | 1 | K.AAQYQVNQAAAAQAAATAAAMTQSAVK.S                                |
| gi 4502337 ref NF |                          | 1      | 2      | 0.07    | 298     | 34259   | 6.1  | U      |      |   | alpha-2-glycoprotein 1, zinc [Homo sapiens]                    |
| *                 | HsFLAG-Control_293_Ti_10 | 2.7744 | 0.1316 | 2404.87 | 2404.69 | 8648.6  | 3    | 337.6  | 35   | 2 | K.HVEDVPAFQALGSLNDLQFFR.Y                                      |
| gi 15718687 ref N |                          | 2      | 2      | 0.07    | 243     | 26688   | 9.7  | U      |      |   | ribosomal protein S3 [Homo sapiens]                            |

|                   |                          |        |        |         |         |         |      |        |      |    |                                                                                       |
|-------------------|--------------------------|--------|--------|---------|---------|---------|------|--------|------|----|---------------------------------------------------------------------------------------|
| *                 | Hs293FLP_TREX_Ti_102.1   | 1.9952 | 0.158  | 896.37  | 897.062 | 6718.7  | 3    | 715.4  | 78.6 | 1  | K.FVADGIFK.A                                                                          |
| *                 | Hs293FLP_TREX_Ti_105.2   | 3.1769 | 0.1801 | 1030.43 | 1030.25 | 6214.3  | 4    | 1475.8 | 87.5 | 1  | R.TEIIILATR.T                                                                         |
| gi 24475847 ref N |                          | 3      | 4      | 0.069   | 642     | 71729   | 5.5  | U      |      |    | influenza virus NS1A binding protein isoform a [Homo sapiens]                         |
| *                 | HsHeLa_Control-MG_Ti_10  | 3.4971 | 0.3366 | 2433.84 | 2434.71 | 6692.8  | 1    | 821    | 47.4 | 1  | K.VDAYIQEHLHQISEEEEEFLK.L                                                             |
| *                 | HsHeLa_Control-MG_Ti_10  | 3.5137 | 0.2104 | 1399.49 | 1397.57 | 4715.8  | 2    | 1096.8 | 79.2 | 2  | K.LYIVGGSDPYGQK.G                                                                     |
| *                 | HsHeLa_Control-MG_Ti_10  | 3.0251 | 0.2602 | 1331.58 | 1331.52 | 6272.2  | 1    | 1130.9 | 80   | 1  | K.LWTSCAPLNIR.R                                                                       |
| gi 5730041 ref NF |                          | 1      | 2      | 0.069   | 333     | 37805   | 5.2  | U      |      |    | suppressor of G2 allele of SKP1 [Homo sapiens]                                        |
| *                 | HsFLAG-Control_HeLa_NE   | 4.3775 | 0.2063 | 2615.51 | 2615.85 | 6763.3  | 1    | 605.9  | 43.2 | 2  | R.FFQSFSDALIDEDPQAALIELTK.A                                                           |
| gi 16945970 ref N |                          | 1      | 2      | 0.069   | 333     | 37653   | 9.2  | U      |      |    | PC4 and SFRS1 interacting protein 1 isoform 1 [Homo sapiens]                          |
| gi 19923653 ref N |                          | 1      | 2      | 0.043   | 530     | 60103   | 9.1  | U      |      |    | PC4 and SFRS1 interacting protein 1 isoform 2 [Homo sapiens]                          |
|                   | HsGST-MOCK_Ti_105.165    | 4.9197 | 0.1624 | 2532.32 | 2531.83 | 8572.3  | 1    | 1780.6 | 40.9 | 2  | K.GYPHWPARVDEVPDGAVKPPTNK.L                                                           |
| gi 31795538 ref N |                          | 1      | 2      | 0.069   | 202     | 22710   | 9    | U      |      |    | replication factor C 3 isoform 2 [Homo sapiens]                                       |
| gi 4506489 ref NF |                          | 1      | 2      | 0.039   | 356     | 40556   | 8.3  | U      |      |    | replication factor C 3 isoform 1 [Homo sapiens]                                       |
|                   | HsFLAG-Control_HeLa_NE   | 4.3984 | 0.367  | 1589.66 | 1590.69 | 10077.3 | 1    | 1528.9 | 69.2 | 2  | K.TVAQSQQLETNSQR.D                                                                    |
| gi 4503401 ref NF |                          | 4      | 18     | 0.068   | 1049    | 113716  | 5    | U      |      |    | desmoglein 1 preproprotein [Homo sapiens]                                             |
| *                 | HsFLAG-Control_Hela_Ti_1 | 3.8013 | 0.3012 | 1664.31 | 1663.75 | 6676.3  | 1    | 1095.4 | 76.9 | 2  | K.IHSDCAANQQVTYR.I                                                                    |
| *                 | HsFLAG-Control_Hela_Ti_1 | 4.632  | 0.4144 | 2046.26 | 2046.37 | 4735.3  | 1    | 621.3  | 55.6 | 13 | R.ISGVGIDQPPYGIFVINQK.T                                                               |
| *                 | HsFLAG-Control_293_Ti_10 | 3.202  | 0.2501 | 1714.27 | 1714.73 | 7006.1  | 1    | 497.4  | 50   | 1  | R.DGGADGMSAECECNK.I                                                                   |
| *                 | HsFLAG-Control_Hela_Ti_1 | 4.0782 | 0.2014 | 2241.96 | 2242.62 | 8232.5  | 2    | 621.1  | 38.1 | 2  | K.ASAISVTVLNVIEGPVFRPGSK.T                                                            |
| gi 4507955 ref NF |                          | 2      | 3      | 0.068   | 414     | 44713   | 6.3  | U      |      |    | YY1 transcription factor [Homo sapiens]                                               |
| *                 | HsFLAG-MOCK_300mM_T      | 2.6861 | 0.2564 | 1664.74 | 1664.73 | 5359.8  | 4    | 455.8  | 44.7 | 1  | K.SYLSGGAGAAGGGGADPGNK.K                                                              |
| *                 | HsFLAG-MOCK_300mM_T      | 2.3945 | 0.1499 | 907.78  | 907.06  | 3902.5  | 9    | 345.5  | 64.3 | 2  | K.SHILTHAK.A                                                                          |
| gi 42716280 ref N |                          | 5      | 5      | 0.067   | 1268    | 141439  | 6.9  | U      |      |    | high density lipoprotein binding protein [Homo sapiens]                               |
| gi 4885409 ref NF |                          | 5      | 5      | 0.067   | 1268    | 141439  | 6.9  | U      |      |    | high density lipoprotein binding protein [Homo sapiens]                               |
|                   | HsFLAG-Control_HeLa_NE   | 3.5857 | 0.364  | 1780.34 | 1780.88 | 5153.9  | 1    | 900.3  | 66.7 | 1  | K.VATLNSEEEEDPPTYK.D                                                                  |
|                   | HsFLAG-Control_HeLa_S10  | 2.6343 | 0.2116 | 1726.67 | 1725.99 | 9811.9  | 4    | 574.3  | 46.4 | 1  | K.ASVITQVFHVPLEER.K                                                                   |
|                   | HsFLAG-Control_HeLa_NE   | 4.0746 | 0.3689 | 1616.45 | 1615.87 | 7436.3  | 1    | 1490.9 | 76.9 | 1  | K.FPEVIINFPDPAQK.S                                                                    |
|                   | HsFLAG-Control_HeLa_NE   | 3.4846 | 0.3414 | 1915.69 | 1916.14 | 7532.9  | 1    | 507    | 47.1 | 1  | K.IDLPAENSNSETIIITGK.R                                                                |
|                   | HsGST-MOCK_Ti_403.527    | 3.1772 | 0.2301 | 2485.84 | 2485.81 | 8624.7  | 1    | 387.5  | 35.7 | 1  | K.ELEALIQNLNDNVVEDSMLVDPK.H                                                           |
| gi 89052285 ref X |                          | 3      | 4      | 0.067   | 1278    | 138244  | 8.4  | U      |      |    | PREDICTED: hypothetical protein LOC57662 [Homo sapiens]                               |
| gi 89057109 ref X |                          | 3      | 4      | 0.067   | 1278    | 138244  | 8.4  | U      |      |    | PREDICTED: similar to Protein KIAA1543 [Homo sapiens]                                 |
|                   | HsHeLa_Control-MG_Ti_20  | 3.7825 | 0.2666 | 3033.82 | 3035.38 | 4472.8  | 1    | 671.7  | 34.3 | 1  | R.TPTQPPPEPGDLPTIEEALQIIHSAEPR.L<br>R.EASGEAEAEAEADSGPVPGGERPAGEGQGEPTSR              |
|                   | Hs293FLP_Ti_303.1450.14  | 3.6608 | 0.2009 | 3639.05 | 3637.72 | 5461.8  | 1    | 538.7  | 24.3 | 1  | PK.A                                                                                  |
|                   | HsHeLa_Control-MG_Ti_20  | 3.6083 | 0.3409 | 2255.98 | 2256.48 | 5475    | 1    | 300.8  | 42.5 | 2  | K.AVTFSPDLGVPHEGLGEYNR.A                                                              |
| gi 32454741 ref N |                          | 2      | 4      | 0.067   | 418     | 46441   | 8.7  | U      |      |    | serine (or cysteine) proteinase inhibitor, clade H, member 1 precursor [Homo sapiens] |
| *                 | HsHeLa_Control-MG_Ti_20  | 3.8521 | 0.3996 | 1661.35 | 1660.82 | 5838.7  | 1    | 884.6  | 67.9 | 2  | R.LYGPSSVSFADDFVR.S                                                                   |
| *                 | HsHeLa_Control-MG_Ti_20  | 3.636  | 0.3578 | 1638.79 | 1638.95 | 6587.4  | 1    | 896.7  | 70.8 | 2  | K.LFYADHPFIFLVR.D                                                                     |
| gi 14251215 ref N |                          | 2      | 2      | 0.066   | 457     | 50792   | 8.6  | U      |      |    | Kruppel-like factor 5 [Homo sapiens]                                                  |
| *                 | HsHeLa3_Ti_106.2472.247  | 2.7041 | 0.3756 | 2130.33 | 2129.46 | 5213.9  | 1    | 685.4  | 55.3 | 1  | R.LGPVPQPPAPQDEPVFAQLK.P                                                              |
| *                 | HsHeLa3_Ti_105.1355.135  | 2.958  | 0.1919 | 966.64  | 966.128 | 3834.9  | 1    | 728.6  | 83.3 | 1  | K.PVLGAANPAR.D                                                                        |
| gi 7706377 ref NF |                          | 2      | 3      | 0.066   | 335     | 37014   | 8.2  | U      |      |    | ankyrin repeat and SOCS box-containing protein 1 [Homo sapiens]                       |
| *                 | Hs293FLP-MG_Ti_206.378   | 4.7261 | 0.3356 | 2388.73 | 2389.72 | 8858.7  | 1    | 1861   | 38.1 | 1  | R.HGCEAAFVSLLEFGANLNLVK.W                                                             |
| *                 | Hs293FLP-MG_Ti_206.377   | 5.4207 | 0.4564 | 2389.09 | 2389.72 | 8643.7  | 1    | 1883.8 | 57.1 | 2  | R.HGCEAAFVSLLEFGANLNLVK.W                                                             |
| gi 75709200 ref N |                          | 1      | 2      | 0.066   | 197     | 22025   | 8.4  | U      |      |    | glutathione peroxidase 4 [Homo sapiens]                                               |
| *                 | HsGST-MOCK_Ti_305.216    | 3.8646 | 0.1564 | 1560.88 | 1561.84 | 6328.8  | 1    | 1050.9 | 75   | 2  | K.RYGPMEEPLVIEK.D                                                                     |
| gi 4506623 ref NF |                          | 2      | 3      | 0.066   | 136     | 15798   | 10.6 | U      |      |    | ribosomal protein L27 [Homo sapiens]                                                  |
| *                 | Hs293FLP_TREX_Ti_102.1   | 2.1674 | 0.1684 | 1049.46 | 1050.2  | 3629    | 2    | 354.9  | 62.5 | 2  | R.YSVDIPLDK.T                                                                         |
| *                 | Hs293FLP_TREX_Ti_102.1   | 2.5686 | 0.1696 | 1050.43 | 1050.2  | 4358.1  | 2    | 582.9  | 75   | 1  | R.YSVDIPLDK.T                                                                         |

|                          |        |        |         |         |         |        |                                                                                 |
|--------------------------|--------|--------|---------|---------|---------|--------|---------------------------------------------------------------------------------|
| gi 18379328 ref N        | 3      | 3      | 0.065   | 647     | 70724   | 9.5 U  | WW domain-containing adapter with a coiled-coil region isoform 1 [Homo sapiens] |
| gi 18379332 ref N        | 3      | 3      | 0.077   | 544     | 59505   | 9.5 U  | WW domain-containing adapter with a coiled-coil region isoform 3 [Homo sapiens] |
| gi 18379330 ref N        | 3      | 3      | 0.07    | 602     | 65483   | 9.4 U  | WW domain-containing adapter with a coiled-coil region isoform 2 [Homo sapiens] |
| HsFLAG-Control_HeLa_NE   | 3.3603 | 0.348  | 2630.45 | 2632.07 | 6613    | 1      | 429.9 35.4 1 R.ISTPQTNTVPIKPLISTPPVSSQPK.V                                      |
| HsFLAG-Control_HeLa_NE   | 4.4957 | 0.3471 | 2631.59 | 2632.07 | 9110.5  | 1      | 1105 30.2 1 R.ISTPQTNTVPIKPLISTPPVSSQPK.V                                       |
| HsFLAG-Control_HeLa_NE   | 4.3141 | 0.486  | 1742.45 | 1742.88 | 8753.8  | 1      | 971.6 56.2 1 K.QGPVQSATQQPVTADK.Q                                               |
| gi 37595750 ref N        | 2      | 5      | 0.065   | 615     | 70703   | 9.4 U  | lamin B receptor [Homo sapiens]                                                 |
| gi 37595752 ref N        | 2      | 5      | 0.065   | 615     | 70703   | 9.4 U  | lamin B receptor [Homo sapiens]                                                 |
| HsFLAG-Control_293_Ti_1( | 3.2754 | 0.2786 | 2468.99 | 2469.84 | 3952.9  | 3      | 224 37.5 2 K.DPSLLNFPPPLPALYELWETR.V                                            |
| HsFLAG-Control_293_Ti_2( | 4.9234 | 0.3489 | 2031.88 | 2031.19 | 8575.9  | 1      | 1304.4 61.1 3 R.NDLSPASSGNAVYDFFIGR.E                                           |
| gi 4505623 ref NF        | 2      | 2      | 0.065   | 430     | 46626   | 7 U    | pre-B-cell leukemia transcription factor 1 [Homo sapiens]                       |
| HsHeLa3_Ti_104.3172.317  | 2.7626 | 0.2032 | 1304.43 | 1304.54 | 5964.5  | 1      | 823.2 70 1 K.PALFNVLCEIK.E                                                      |
| HsHeLa3_Ti_104.3057.305  | 2.6581 | 0.347  | 2127.08 | 2127.35 | 11015.6 | 1      | 775 46.9 1 K.YEQACNEFTTHVMNLLR.E                                                |
| gi 55770900 ref N        | 2      | 3      | 0.065   | 353     | 41401   | 9.9 U  | BRIX [Homo sapiens]                                                             |
| Hs293FLP_TREX_Ti_103.1   | 3.3731 | 0.2047 | 1240.41 | 1240.36 | 3648.4  | 1      | 804.6 85 2 K.RNEIDAEPKAK.R                                                      |
| Hs293FLP_TREX_Ti_106.2   | 2.7159 | 0.1342 | 1466.15 | 1464.75 | 8137    | 2      | 911.3 72.7 1 K.PIEIQWVKPEPK.V                                                   |
| gi 21361741 ref N        | 1      | 2      | 0.065   | 307     | 33879   | 6.3 U  | hypothetical protein LOC51534 [Homo sapiens]                                    |
| HsFLAG-Control_HeLa_S1(  | 4.519  | 0.3815 | 2185.8  | 2186.38 | 8391.4  | 1      | 1103.1 52.6 2 K.YAGSALQYEDVSTAVQNLQK.A                                          |
| gi 4502027 ref NF        | 6      | 30     | 0.064   | 609     | 69367   | 6.3 U  | albumin precursor [Homo sapiens]                                                |
| HsFLAG-Control_293_Ti_1( | 2.7549 | 0.2713 | 1372.22 | 1372.41 | 7505.4  | 1      | 651.3 63.6 1 K.AAFTECCQAADK.A                                                   |
| HsFLAG-Control_HeLa_S1(  | 3.4004 | 0.3166 | 1445.84 | 1444.5  | 8946.2  | 1      | 972.5 68.2 2 K.YICENQDSISSK.L                                                   |
| HsFLAG-Control_293_Ti_1( | 3.3407 | 0.256  | 1641.11 | 1640.92 | 6425.6  | 1      | 835.2 64.3 14 K.KVPQVSTPTLVEVSR.N                                               |
| HsGST-MOCK_Ti_304.202i   | 2.7217 | 0.3551 | 1511.61 | 1512.75 | 3525.1  | 1      | 258.4 57.7 2 K.VPQVSTPTLVEVSR.N                                                 |
| HsGST-MOCK_Ti_304.203i   | 3.5901 | 0.321  | 1512.02 | 1512.75 | 6656.5  | 1      | 1019.8 69.2 2 K.VPQVSTPTLVEVSR.N                                                |
| HsFLAG-Control_HeLa_NE   | 3.6048 | 0.3135 | 1514.08 | 1512.75 | 6985.6  | 2      | 883.4 61.5 9 K.VPQVSTPTLVEVSR.N                                                 |
| gi 45593130 ref N        | 2      | 2      | 0.064   | 549     | 61993   | 9.2 U  | guanine nucleotide binding protein-like 3 isoform 1 [Homo sapiens]              |
| gi 45643129 ref N        | 2      | 2      | 0.065   | 537     | 60540   | 8.8 U  | guanine nucleotide binding protein-like 3 isoform 2 [Homo sapiens]              |
| gi 45643127 ref N        | 2      | 2      | 0.065   | 537     | 60540   | 8.8 U  | guanine nucleotide binding protein-like 3 isoform 2 [Homo sapiens]              |
| HsFLAG-Control_MG_293_   | 3.2488 | 0.1771 | 1087.34 | 1087.31 | 4104.8  | 1      | 945.4 90 1 R.VGVIGFPNVGK.S                                                      |
| HsHeLa3_Ti_104.3737.373  | 2.763  | 0.2092 | 2530.82 | 2530.92 | 6961.2  | 2      | 425.6 30.4 1 K.QITIIDSPSFIVSPLNSSSALALR.S                                       |
| gi 4557641 ref NF        | 2      | 2      | 0.064   | 488     | 55325   | 5.8 U  | histone deacetylase 2 [Homo sapiens]                                            |
| HsHeLa3_Ti_104.1499.149  | 2.5627 | 0.0945 | 1428.9  | 1427.57 | 6387.6  | 4      | 437.4 54.5 1 R.SIRPDNMSEYSK.Q                                                   |
| HsHeLa3_Ti_106.2102.210  | 5.3751 | 0.3969 | 2234.85 | 2235.49 | 6588.3  | 1      | 1716.8 69.4 1 K.LHISPSNMTNQNTPEYMEK.I                                           |
| gi 4759100 ref NF        | 3      | 4      | 0.064   | 484     | 53542   | 10.5 U | splicing factor p54 [Homo sapiens]                                              |
| HsFLAG-Control_HeLa_NE   | 4.4647 | 0.3518 | 1785.55 | 1785.09 | 3810.9  | 1      | 910.8 68.8 2 R.ALIVVPYAEGVIPDEAK.A                                              |
| HsFLAG-Control_HeLa_NE   | 3.7824 | 0.2871 | 1406.81 | 1406.67 | 6176.2  | 1      | 780.9 65.4 1 K.LNHVAAGLVSPSLK.S                                                 |
| HsHeLa3_Ti_106.2116.211  | 3.1504 | 0.2486 | 1407.08 | 1406.67 | 6277.5  | 1      | 693.1 61.5 1 K.LNHVAAGLVSPSLK.S                                                 |
| gi 39780588 ref N        | 3      | 3      | 0.063   | 804     | 91810   | 7.4 U  | hypothetical protein LOC55720 [Homo sapiens]                                    |
| HsHeLa3_Ti_104.3360.336  | 3.8809 | 0.2961 | 2536.36 | 2535.86 | 4672.4  | 1      | 608.2 43.2 1 R.AYLFAHAVDFVPSEENNLVGTGLK.I                                       |
| HsHeLa3_Ti_105.1495.149  | 2.5703 | 0.2989 | 1373.6  | 1373.51 | 5779.4  | 8      | 491.8 58.3 1 R.ASPLFSQHTAADK.H                                                  |
| HsHeLa3_Ti_103.3462.346  | 3.0107 | 0.4114 | 1890.83 | 1891.18 | 3934.6  | 1      | 304.5 53.6 1 K.WTYDPYVPEPVPWLK.S                                                |
| gi 61835148 ref N        | 3      | 4      | 0.063   | 621     | 69721   | 6.2 U  | fragile X mental retardation-related protein 1 isoform a [Homo sapiens]         |
| gi 61835164 ref N        | 3      | 4      | 0.072   | 539     | 60792   | 6.4 U  | fragile X mental retardation-related protein 1 isoform b [Homo sapiens]         |
| Hs293FLP_TREX_Ti_102.2   | 3.334  | 0.1584 | 1575.49 | 1575.69 | 4008.2  | 1      | 400.8 62.5 1 R.ANDQEPGWWLAK.V                                                   |
| HsFlag1P_Ti_105.2429.243 | 4.0286 | 0.3644 | 1949.66 | 1949.17 | 6222    | 1      | 924.9 64.7 1 R.KVPGVTAIELDEDTGTFR.I                                             |
| Hs293FLP_TREX_Ti_102.1   | 2.1428 | 0.1072 | 943.49  | 944.116 | 6968.5  | 3      | 643.7 71.4 2 K.VIQEIVDK.S                                                       |
| gi 12383062 ref N        | 2      | 2      | 0.063   | 622     | 68935   | 7.2 U  | likely ortholog of kinesin light chain 2 [Homo sapiens]                         |
| gi 89077469 ref X        | 2      | 2      | 0.061   | 638     | 70717   | 6.6 U  | PREDICTED: similar to likely ortholog of kinesin light chain 2 [Homo sapiens]   |
| HsHeLa3_Ti_103.2304.230  | 2.8705 | 0.3639 | 2106.58 | 2106.34 | 5987.1  | 1      | 405.8 42.5 1 R.ALLAPLVAPEAGEAEPGSQER.C                                          |



|                   |                          |        |        |         |         |         |      |        |      |   |                                                                                                              |
|-------------------|--------------------------|--------|--------|---------|---------|---------|------|--------|------|---|--------------------------------------------------------------------------------------------------------------|
|                   | HsHeLa3_Ti_105.2863.286  | 2.823  | 0.2582 | 1868.62 | 1868.14 | 7389.6  | 1    | 1027   | 64.7 | 1 | K.DHPVAATLNLLAVLYGK.R                                                                                        |
| gi 41327730 ref N |                          | 1      | 5      | 0.063   | 270     | 29500   | 7    | U      |      |   | calponin 2 isoform b [Homo sapiens]                                                                          |
| gi 4758018 ref NF |                          | 1      | 5      | 0.055   | 309     | 33697   | 7.3  | U      |      |   | calponin 2 isoform a [Homo sapiens]                                                                          |
|                   | HsFLAG-Control_HeLa_NE   | 5.2958 | 0.4527 | 1863.87 | 1863.12 | 7842    | 1    | 1815.3 | 71.9 | 5 | R.TWIEGLTGLSIGPDFQK.G                                                                                        |
| gi 4504555 ref NF |                          | 5      | 6      | 0.062   | 1262    | 144480  | 6.1  | U      |      |   | isoleucine-tRNA synthetase [Homo sapiens]                                                                    |
| gi 7770072 ref NF |                          | 5      | 6      | 0.062   | 1262    | 144480  | 6.1  | U      |      |   | isoleucine-tRNA synthetase [Homo sapiens]                                                                    |
|                   | HsFLAG-Control_293_Ti_2( | 2.8556 | 0.1396 | 2175.17 | 2172.31 | 6973.3  | 8    | 292.9  | 36.1 | 1 | R.EFEDAFPADFAIEGIDQTR.G                                                                                      |
|                   | HsFLAG-Control_MG_293_   | 2.8072 | 0.2087 | 1527.24 | 1527.76 | 8460.4  | 1    | 656.7  | 53.6 | 1 | K.NVIVNGLVLASDGQK.M                                                                                          |
|                   | HsFLAG-Control_293_Ti_2( | 3.786  | 0.2887 | 1491.02 | 1491.73 | 7364.6  | 1    | 963.9  | 66.7 | 2 | K.EIVVIHQDPEALK.D                                                                                            |
|                   | HsFLAG-Control_MG_293_   | 2.6878 | 0.215  | 1399.79 | 1399.63 | 5574.6  | 1    | 468.2  | 62.5 | 1 | K.APLKYPVSPSPDK.V                                                                                            |
|                   | HsFLAG-Control_293_Ti_2( | 3.6098 | 0.2428 | 2120    | 2119.38 | 10401.6 | 5    | 546.8  | 44.1 | 1 | K.LFLNETQTQEITEDIPVK.T                                                                                       |
| gi 48762920 ref N |                          | 2      | 3      | 0.062   | 780     | 85018   | 7.5  | U      |      |   | liver phosphofructokinase isoform b [Homo sapiens]                                                           |
| gi 50346005 ref N |                          | 2      | 3      | 0.058   | 827     | 90203   | 7.8  | U      |      |   | liver phosphofructokinase isoform a [Homo sapiens]                                                           |
|                   | Hs293FLP-MG_Ti_205.353   | 4.9445 | 0.3446 | 3105.73 | 3104.46 | 10971.1 | 1    | 1149.4 | 26.7 | 1 | R.AAAYNLVQHGITNLCVIGGDGSLTGANIFR.S                                                                           |
|                   | HsFLAG-Control_HeLa_S1(  | 4.7241 | 0.391  | 1910.02 | 1909.11 | 10812.1 | 1    | 1135.1 | 52.9 | 2 | R.TNVLGHLQQGGAPTFFDR.N                                                                                       |
| gi 55956788 ref N |                          | 5      | 9      | 0.062   | 710     | 76615   | 4.7  | U      |      |   | nucleolin [Homo sapiens]                                                                                     |
| *                 | Hs293FLP_TREX_Ti_105.2   | 3.0164 | 0.2915 | 1563.45 | 1563.79 | 5454.2  | 1    | 887.2  | 71.4 | 2 | K.SAPELKTGISDVFAK.N                                                                                          |
| *                 | Hs293FLP_TREX_Ti_103.1   | 2.9153 | 0.2358 | 1177.43 | 1177.39 | 5286.9  | 1    | 916    | 88.9 | 1 | K.VFGNEIKLEK.P                                                                                               |
| *                 | Hs293FLP_TREX_Ti_102.1   | 2.4024 | 0.2492 | 1178.52 | 1179.27 | 2110.6  | 3    | 162.5  | 61.1 | 1 | K.EVFEDAAEIR.L                                                                                               |
| *                 | Hs293FLP_TREX_Ti_102.1   | 3.5063 | 0.2046 | 1179.36 | 1179.27 | 4829.7  | 1    | 1007   | 88.9 | 2 | K.EVFEDAAEIR.L                                                                                               |
| *                 | Hs293FLP_TREX_Ti_104.1   | 3.0568 | 0.2184 | 1058.29 | 1058.27 | 6465.5  | 2    | 1156.9 | 87.5 | 3 | K.VTLDWAKPK.G                                                                                                |
| gi 31657101 ref N |                          | 2      | 2      | 0.062   | 520     | 58846   | 6.1  | U      |      |   | WD repeat domain 23 isoform 2 [Homo sapiens]                                                                 |
| gi 31657103 ref N |                          | 2      | 2      | 0.059   | 546     | 61670   | 6.4  | U      |      |   | WD repeat domain 23 isoform 1 [Homo sapiens]                                                                 |
|                   | HsGST-MOCK_Ti_305.286i   | 3.2676 | 0.1417 | 2169.04 | 2169.4  | 5406.3  | 1    | 545.9  | 50   | 1 | R.VISHFLPNDLGFDTSYSQK.A                                                                                      |
|                   | HsGST-MOCK_Ti_305.293i   | 4.09   | 0.3559 | 1443.12 | 1442.74 | 6993.5  | 1    | 1442.2 | 79.2 | 1 | K.VVYDILLSGHIVK.K                                                                                            |
| gi 4506331 ref NF |                          | 1      | 7      | 0.062   | 145     | 16386   | 6.7  | U      |      |   | 6-pyruvoyltetrahydropterin synthase [Homo sapiens]                                                           |
| *                 | HsFLAG-Control_MG_293_   | 2.2407 | 0.1768 | 987.54  | 988.258 | 3988.1  | 1    | 482.7  | 68.8 | 7 | K.VLPVGVLYK.V                                                                                                |
| gi 4505101 ref NF |                          | 2      | 2      | 0.061   | 749     | 84052   | 9.6  | U      |      |   | microtubule-associated protein 7 [Homo sapiens]                                                              |
| *                 | HsHeLa_Control-MG_Ti_20  | 2.211  | 0.348  | 989.49  | 990.147 | 2882.4  | 1    | 300.5  | 75   | 1 | R.IIHGTASYK.K                                                                                                |
| *                 | HsGST-MOCK_Ti_105.155i   | 3.7001 | 0.0881 | 3615.67 | 3615.95 | 6316.6  | 1    | 623.1  | 24.3 | 1 | K.V                                                                                                          |
| gi 34485722 ref N |                          | 2      | 3      | 0.061   | 521     | 57811   | 4.9  | U      |      |   | karyopherin alpha 3 [Homo sapiens]                                                                           |
| *                 | Hs293FLP-MG_Ti_302.165i  | 2.732  | 0.2108 | 2039.14 | 2038.09 | 6191.3  | 1    | 498.4  | 50   | 1 | R.NVPQEELEDSDVDADFK.A                                                                                        |
| *                 | Hs293FLP-MG_Ti_305.156i  | 4.0623 | 0.3624 | 1759.22 | 1758.93 | 7535.4  | 1    | 1150.4 | 69.2 | 2 | K.IEVLQHENEDIYK.L                                                                                            |
| gi 16905517 ref N |                          | 1      | 3      | 0.061   | 262     | 31301   | 11.3 | U      |      |   | FUS interacting protein (serine-arginine rich) 1 isoform 2 [Homo sapiens]                                    |
| gi 88952702 ref X |                          | 1      | 3      | 0.151   | 106     | 12581   | 9.4  | U      |      |   | PREDICTED: similar to FUS interacting protein (serine-arginine rich) 1 [Homo sapiens]                        |
| gi 88944399 ref X |                          | 1      | 3      | 0.232   | 69      | 8329    | 9.4  | U      |      |   | PREDICTED: similar to FUS interacting protein (serine-arginine rich) 1 isoform 10 [Homo sapiens]             |
| gi 88944397 ref X |                          | 1      | 3      | 0.061   | 262     | 31301   | 11.3 | U      |      |   | PREDICTED: similar to FUS-interacting serine-arginine-rich protein 1 (TLS-associated protein) [Homo sapiens] |
| gi 88944395 ref X |                          | 1      | 3      | 0.232   | 69      | 8329    | 9.4  | U      |      |   | PREDICTED: similar to FUS interacting protein (serine-arginine rich) 1 isoform 9 [Homo sapiens]              |
| gi 88944389 ref X |                          | 1      | 3      | 0.087   | 183     | 22222   | 10.3 | U      |      |   | PREDICTED: similar to FUS interacting protein (serine-arginine rich) 1 isoform 6 [Homo sapiens]              |
| gi 88944257 ref X |                          | 1      | 3      | 0.092   | 173     | 21000   | 10.5 | U      |      |   | PREDICTED: similar to FUS interacting protein (serine-arginine rich) 1 isoform 4 [Homo sapiens]              |
| gi 88944255 ref X |                          | 1      | 3      | 0.232   | 69      | 8329    | 9.4  | U      |      |   | PREDICTED: similar to FUS interacting protein (serine-arginine rich) 1 isoform 3 [Homo sapiens]              |
| gi 88944253 ref X |                          | 1      | 3      | 0.232   | 69      | 8329    | 9.4  | U      |      |   | PREDICTED: similar to FUS interacting protein (serine-arginine rich) 1 isoform 2 [Homo sapiens]              |
| gi 5730079 ref NF |                          | 1      | 3      | 0.087   | 183     | 22222   | 10.3 | U      |      |   | FUS interacting protein (serine-arginine rich) 1 isoform 1 [Homo sapiens]                                    |
|                   | HsFLAG-Control_HeLa_NE   | 3.3069 | 0.2737 | 1919    | 1918.2  | 5915.8  | 1    | 829.5  | 56.7 | 3 | R.YGPIVDVYVPLDFYTR.R                                                                                         |
| gi 14277700 ref N |                          | 1      | 2      | 0.061   | 132     | 14515   | 7.2  | U      |      |   | ribosomal protein S12 [Homo sapiens]                                                                         |
| gi 89034991 ref X |                          | 1      | 2      | 0.061   | 132     | 14598   | 6.9  | U      |      |   | PREDICTED: similar to ribosomal protein S12 [Homo sapiens]                                                   |
| gi 88955046 ref X |                          | 1      | 2      | 0.061   | 132     | 14502   | 6.8  | U      |      |   | PREDICTED: similar to ribosomal protein S12 [Homo sapiens]                                                   |
| gi 88953190 ref X |                          | 1      | 2      | 0.061   | 132     | 14501   | 7.2  | U      |      |   | PREDICTED: similar to ribosomal protein S12 [Homo sapiens]                                                   |

|                          |        |        |         |         |         |       |                                                                                       |
|--------------------------|--------|--------|---------|---------|---------|-------|---------------------------------------------------------------------------------------|
| gi 51468838 ref X        | 1      | 2      | 0.061   | 132     | 14598   | 6.9 U | PREDICTED: similar to ribosomal protein S12 [Homo sapiens]                            |
| Hs293FLP_TREX_Ti_102.2   | 2.1502 | 0.0925 | 1042.38 | 1043.16 | 7478.7  | 1     | 895.4 78.6 2 K.DVIEEYFK.C                                                             |
| gi 50658082 ref N        | 3      | 5      | 0.06    | 597     | 69752   | 5.7 U | centrosomal protein 70 kDa [Homo sapiens]                                             |
| Hs283FLP_Ti_103.1176.11  | 2.58   | 0.1816 | 1078.43 | 1078.21 | 4357.9  | 2     | 604.2 77.8 1 K.SKIDALSSEK.L                                                           |
| Hs283FLP_Ti_105.2971.29  | 3.5739 | 0.1743 | 1484.85 | 1484.78 | 3732.9  | 4     | 755.7 79.2 3 K.TLSAELVPWLNLK.K                                                        |
| Hs283FLP_Ti_104.2351.23  | 3.9724 | 0.3912 | 1478.58 | 1477.7  | 3056.8  | 2     | 540.9 70.8 1 K.LFDVPSLNGVYPR.M                                                        |
| gi 40556376 ref N        | 2      | 6      | 0.06    | 553     | 60547   | 9.2 U | cytokine-like nuclear factor n-pac [Homo sapiens]                                     |
| Hs293FLP-MG_Ti_205.267   | 4.2458 | 0.3543 | 1706.65 | 1707.03 | 8497.6  | 1     | 1511.2 65.6 5 K.DLVLGPSGVLQIRPGK.C                                                    |
| HsHeLa_Control-MG_Ti_20  | 2.5839 | 0.2054 | 1985.2  | 1986.24 | 9993.8  | 1     | 720.9 53.3 1 K.CQNILQGNFKPDFYLK.Y                                                     |
| gi 5454096 ref NF        | 2      | 3      | 0.06    | 487     | 55630   | 5.1 U | serine/threonine kinase 4 [Homo sapiens]                                              |
| Hs293FLP-MG_Ti_202.460   | 3.2892 | 0.3539 | 1776.26 | 1777.02 | 7185.8  | 1     | 1034.5 56.7 2 K.TLTEDEIATILQSTLK.G                                                    |
| HsHeLa_Control-MG_Ti_20  | 2.5846 | 0.2356 | 1482.63 | 1482.73 | 9273.7  | 1     | 640.2 54.2 1 R.ATATQLLQHPFVR.S                                                        |
| gi 73486658 ref N        | 2      | 3      | 0.06    | 430     | 47518   | 9 U   | aspartate aminotransferase 2 precursor [Homo sapiens]                                 |
| Hs293FLP_TREX_Ti_104.1   | 2.8438 | 0.2459 | 1451.24 | 1450.68 | 7317.6  | 1     | 1182 69.2 1 R.FVTVQTISGTGALR.I                                                        |
| Hs293FLP_TREX_Ti_103.2   | 4.1146 | 0.25   | 1269.4  | 1268.5  | 7896.3  | 1     | 1490.1 81.8 2 R.IAAAILNTPDLR.K                                                        |
| gi 54607053 ref N        | 8      | 16     | 0.059   | 2671    | 292708  | 7.4 U | GCN1 general control of amino-acid synthesis 1-like 1 [Homo sapiens]                  |
| HsFLAG-Control_HeLa_S10  | 3.7369 | 0.2039 | 1443.85 | 1441.63 | 5689.8  | 1     | 789.1 69.2 1 K.NLLHSLQSSGIGSK.A                                                       |
| HsFLAG-Control_HeLa_S10  | 4.6561 | 0.4493 | 1914.43 | 1913.18 | 7307.8  | 1     | 1875.6 69.4 3 K.VLPLEALVTDAGEVTEAGK.A                                                 |
| HsFLAG-Control_HeLa_S10  | 3.9187 | 0.3901 | 2023.55 | 2022.4  | 10550.1 | 1     | 1250.5 52.8 2 R.VLPQLISTITASVQNPALR.L                                                 |
| HsFLAG-Control_HeLa_S10  | 4.5137 | 0.3915 | 2238.37 | 2238.63 | 9501.6  | 1     | 1620.5 57.5 3 R.LQELDGELEAALGLLDIILAK.N                                               |
| HsFLAG-Control_293_Ti_10 | 4.118  | 0.0935 | 2316.5  | 2315.76 | 5146.5  | 1     | 801.7 55 3 K.NPSGLTQYIPVLVDSFPLLK.S                                                   |
| HsFLAG-Control_HeLa_S10  | 3.7862 | 0.2491 | 2117.62 | 2117.5  | 5375.5  | 1     | 787.7 55 1 K.GEPGAAPLSAPAFSLVFPFLK.M                                                  |
| HsFLAG-Control_HeLa_S10  | 3.4723 | 0.2196 | 2121.43 | 2119.47 | 6998    | 1     | 538 47.4 2 R.NPEILAIAPVLLDALDPSR.K                                                    |
| HsFLAG-Control_HeLa_S10  | 3.6865 | 0.2137 | 2450.18 | 2449.72 | 7148.9  | 1     | 513.2 38.1 1 R.LFNDSSPVVLEESWDALNAITK.K                                               |
| gi 4507659 ref NF        | 8      | 10     | 0.059   | 2349    | 265598  | 5.1 U | translocated promoter region (to activated MET oncogene) [Homo sapiens]               |
| HsHeLa3_Ti_104.2324.232  | 3.1553 | 0.2307 | 1829    | 1827.05 | 6885.8  | 1     | 717.8 57.1 1 K.ELLHSQNTWLNTELK.T                                                      |
| HsHeLa3_Ti_105.2923.292  | 2.5393 | 0.283  | 2835.24 | 2836.26 | 3454.5  | 1     | 198.9 29.6 1 R.ILLSQTTGVAIPLHASSLDDVSLASTPK.R                                         |
| HsHeLa3_Ti_105.2922.292  | 3.9948 | 0.3113 | 2836.07 | 2836.26 | 7233.1  | 1     | 1261.6 32.4 1 R.ILLSQTTGVAIPLHASSLDDVSLASTPK.R                                        |
| HsHeLa3_Ti_104.4460.446  | 5.5743 | 0.4546 | 2026.04 | 2025.36 | 10623.9 | 1     | 2145 67.6 2 R.GQNLLLLTNLQTIQGILER.S                                                   |
| HsFLAG-Control_HeLa_NE   | 4.7791 | 0.34   | 1774.9  | 1773.94 | 7699.6  | 1     | 1448.4 71.4 1 R.NLQEQTVQLQSELSR.L                                                     |
| HsFLAG-MOCK_300mM_T      | 3.9037 | 0.2974 | 1396.22 | 1394.66 | 6149.4  | 1     | 1136.9 75 2 K.IAHLAGVKDQLTK.E                                                         |
| HsHeLa3_Ti_106.2055.205  | 3.1085 | 0.1071 | 2366.39 | 2366.67 | 3726.9  | 1     | 284.2 43.5 1 R.GIASTSDPPTANIKPTPVVSTPSK.V                                             |
| HsHeLa3_Ti_102.1650.165  | 4.5734 | 0.4692 | 2486.58 | 2487.47 | 6687.7  | 1     | 764.4 43.8 1 R.AADSQNSGEGNTGAAESSFSQEVSR.E                                            |
| gi 55956916 ref N        | 4      | 5      | 0.059   | 1108    | 127062  | 8.9 U | myosin IE [Homo sapiens]                                                              |
| HsFLAG-Control_Hela_Ti_1 | 3.0802 | 0.3693 | 1842.83 | 1844.12 | 8212.9  | 1     | 1014.4 56.2 1 K.DIILQSNPLLEAFGNAK.T                                                   |
| HsFLAG-Control_Hela_Ti_1 | 3.9928 | 0.4105 | 1728.61 | 1728.86 | 8450.1  | 1     | 1176 63.3 1 K.YFEIQFSPGGEPDGGK.I                                                      |
| HsFLAG-Control_Hela_Ti_1 | 4.2006 | 0.1627 | 1208.48 | 1208.49 | 6118    | 4     | 1165.8 77.3 2 K.VLQVSIQGPLPK.N                                                        |
| HsFLAG-Control_Hela_Ti_1 | 3.8786 | 0.4989 | 2172.73 | 2174.25 | 4440.7  | 1     | 401.1 50 1 R.NTTQNTGYSSGTQNANYPVR.A                                                   |
| gi 21071052 ref N        | 4      | 4      | 0.059   | 1009    | 113928  | 8.6 U | SWI/SNF-related matrix-associated actin-dependent regulator of chromatin a3 [Homo sap |
| gi 21071054 ref N        | 4      | 4      | 0.059   | 1009    | 113928  | 8.6 U | SWI/SNF-related matrix-associated actin-dependent regulator of chromatin a3 [Homo sap |
| HsHeLa3_Ti_103.2008.200  | 2.9061 | 0.1546 | 1872.99 | 1872.11 | 6532.5  | 3     | 532.7 46.7 1 R.YYTGVVNNNEMVALQR.D                                                     |
| HsHeLa3_Ti_103.2623.262  | 2.8686 | 0.2511 | 1482.46 | 1481.61 | 5571    | 2     | 566.9 61.5 1 K.TLGFNLESGWWSGR.A                                                       |
| HsHeLa3_Ti_104.4928.492  | 2.7424 | 0.1012 | 1223.42 | 1222.47 | 7561.8  | 8     | 798.8 66.7 1 K.DLWSLLSFLK.L                                                           |
| HsHeLa3_Ti_106.3456.345  | 4.2761 | 0.4414 | 2266.03 | 2265.62 | 6270.4  | 1     | 851.8 50 1 R.YFNEGTVLAHYADVLGLLLR.L                                                   |
| gi 34996483 ref N        | 3      | 4      | 0.059   | 749     | 79423   | 9 U   | hypothetical protein LOC132660 [Homo sapiens]                                         |
| HsHeLa3_Ti_105.1234.123  | 2.8377 | 0.2457 | 1300.18 | 1299.47 | 6875.5  | 2     | 664.7 63.6 1 K.LGNQTLKPDGQK.L                                                         |
| HsHeLa3_Ti_104.1231.123  | 1.9286 | 0.2304 | 1000.55 | 1001.17 | 3954    | 9     | 204 55.6 1 R.TPTSGPVITK.L                                                             |
| HsHeLa3_Ti_106.2386.238  | 4.5329 | 0.3915 | 2214.05 | 2213.5  | 9344.6  | 1     | 630.3 38.1 2 K.LSSQISDLLTRPTPALNSGGGK.L                                               |
| gi 17402904 ref N        | 1      | 2      | 0.059   | 272     | 28235   | 6.3 U | homolog of yeast mRNA transport regulator 3 [Homo sapiens]                            |

|                   |                          |        |        |         |         |         |     |        |      |   |                                                                           |
|-------------------|--------------------------|--------|--------|---------|---------|---------|-----|--------|------|---|---------------------------------------------------------------------------|
| *                 | HsHeLa3_Ti_104.1416.141  | 3.1186 | 0.3246 | 1309.68 | 1309.43 | 5699.8  | 4   | 633.9  | 53.3 | 2 | R.GGGPAGAGGEAPAALR.G                                                      |
| gi 62460633 ref N |                          | 4      | 10     | 0.058   | 1271    | 140519  | 8.3 | U      |      |   | RNA-binding motif protein 16 [Homo sapiens]                               |
|                   | HsFLAG-Control_HeLa_NE   | 3.7821 | 0.31   | 1331.71 | 1331.6  | 7308    | 1   | 1695.9 | 86.4 | 3 | K.VPGLYVIDSIVR.Q                                                          |
| *                 | HsFLAG-Control_HeLa_NE   | 4.8537 | 0.4183 | 3232.46 | 3230.65 | 5369    | 1   | 776.8  | 28   | 4 | K.DVGFGLVIPGGSVASNLATSALPAGNVFNAPTK.Q                                     |
| *                 | HsFLAG-MOCK_300mM_T      | 2.939  | 0.1697 | 1804.94 | 1803.97 | 5335.2  | 3   | 555.1  | 56.7 | 2 | K.VPHLIDHQISSGENTR.S                                                      |
| *                 | HsFLAG-Control_HeLa_NE   | 3.8685 | 0.2474 | 1421.53 | 1420.52 | 8191.2  | 1   | 1309.8 | 72.7 | 1 | R.VFDYFEGATSQR.K                                                          |
| gi 15559211 ref N |                          | 4      | 5      | 0.058   | 1097    | 121888  | 6.7 | U      |      |   | RE1-silencing transcription factor [Homo sapiens]                         |
| *                 | HsFLAG-MOCK_150mM_T      | 3.551  | 0.4293 | 2763.81 | 2765.05 | 4713.3  | 1   | 621    | 44   | 1 | R.SLELSVVEPQPVEASGAPDIYSSNK.D                                             |
| *                 | HsFLAG-MOCK_150mM_T      | 4.7158 | 0.4622 | 1658.29 | 1658.68 | 6816.5  | 1   | 1580   | 73.3 | 2 | K.ARESGSSTAEEDFSK.G                                                       |
| *                 | HsFLAG-MOCK_150mM_T      | 3.4432 | 0.2576 | 1376.51 | 1376.42 | 4999.9  | 3   | 696    | 77.3 | 1 | K.ENLREEASGDQK.L                                                          |
| *                 | HsFLAG-MOCK_150mM_T      | 3.0112 | 0.3269 | 1289.53 | 1289.36 | 5426.5  | 1   | 883.4  | 77.8 | 1 | K.GDFVCIFCDR.S                                                            |
| gi 45446743 ref N |                          | 2      | 3      | 0.058   | 938     | 102975  | 7   | U      |      |   | DEAD box polypeptide 42 protein [Homo sapiens]                            |
| gi 45446747 ref N |                          | 2      | 3      | 0.058   | 938     | 102975  | 7   | U      |      |   | DEAD box polypeptide 42 protein [Homo sapiens]                            |
|                   | HsHeLa3_Ti_103.3692.369  | 3.1505 | 0.2662 | 1607.94 | 1607.87 | 6751.7  | 1   | 846.9  | 66.7 | 1 | K.ELLDLMAQNAWFR.K                                                         |
|                   |                          |        |        |         |         |         |     |        |      |   | K.AGSSAAGASGWTSAGSLNSVPTNSAQQGHNSPDS                                      |
|                   | HsHeLa3_Ti_104.1751.175  | 4.6343 | 0.3776 | 3814.33 | 3814.98 | 5569    | 1   | 570.4  | 21.2 | 2 | VTSAAK.G                                                                  |
| gi 25777602 ref N |                          | 3      | 3      | 0.058   | 908     | 100200  | 5.2 | U      |      |   | proteasome 26S non-ATPase subunit 2 [Homo sapiens]                        |
| *                 | HsFLAG-Control_293_Ti_2( | 3.8151 | 0.189  | 2217.97 | 2219.42 | 8423.6  | 2   | 1035.5 | 33   | 1 | K.APVQPQQSPAAAPGGTDEKPSGK.E                                               |
| *                 | HsFLAG-Control_MG_293_   | 3.5779 | 0.3401 | 1474.35 | 1474.67 | 11789.1 | 1   | 1126   | 57.1 | 1 | K.SGALLACGIVNSGVR.N                                                       |
| *                 | HsFLAG-Control_HeLa_S1(  | 4.074  | 0.3087 | 1453.31 | 1453.68 | 7761.1  | 1   | 1252.6 | 67.9 | 1 | R.VGQAVDVVGQAGKPK.T                                                       |
| gi 45439306 ref N |                          | 2      | 5      | 0.058   | 501     | 57136   | 6.5 | U      |      |   | aspartyl-tRNA synthetase [Homo sapiens]                                   |
| *                 | Hs293FLP_TREX_Ti_103.2   | 3.7597 | 0.222  | 1162.02 | 1161.39 | 8345.9  | 1   | 1584.3 | 83.3 | 3 | K.IYVISLAEPR.L                                                            |
| *                 | HsFLAG-Control_293_Ti_2( | 5.3771 | 0.3845 | 1963.57 | 1962.21 | 10130.2 | 1   | 2402.1 | 66.7 | 2 | K.IISAASEGGANVFTVSYFK.N                                                   |
| gi 11321607 ref N |                          | 2      | 2      | 0.058   | 432     | 48551   | 6.1 | U      |      |   | thyroid hormone receptor interactor 13 [Homo sapiens]                     |
| *                 | HsFLAG-Control_HeLa_S1(  | 3.2197 | 0.2863 | 1446.45 | 1446.64 | 7165.6  | 1   | 1090.7 | 75   | 1 | R.NVQSVSIIDTELK.V                                                         |
| *                 | HsFLAG-Control_HeLa_S1(  | 3.2064 | 0.2886 | 1175.52 | 1175.42 | 5586.3  | 1   | 1105.4 | 77.3 | 1 | R.VVLLHGPPGTGK.T                                                          |
| gi 22027651 ref N |                          | 3      | 3      | 0.057   | 949     | 104637  | 5.1 | U      |      |   | adaptor-related protein complex 1 beta 1 subunit isoform a [Homo sapiens] |
| gi 22027653 ref N |                          | 3      | 3      | 0.057   | 942     | 103921  | 5.1 | U      |      |   | adaptor-related protein complex 1 beta 1 subunit isoform b [Homo sapiens] |
|                   | HsGST-MOCK_Ti_403.148    | 2.1831 | 0.0929 | 889.49  | 889.039 | 5749    | 3   | 411.2  | 75   | 1 | K.YFTTTTK.G                                                               |
|                   | HsFLAG-Control_HeLa_S1(  | 4.4884 | 0.3089 | 1570.99 | 1569.84 | 6416.5  | 1   | 1202.6 | 71.4 | 1 | R.LASQANIAQVLAELK.E                                                       |
|                   | HsFLAG-Control_HeLa_S1(  | 3.6245 | 0.1112 | 3617.86 | 3618.03 | 11471.7 | 3   | 726.2  | 21.8 | 1 | R.IDNADELLESFLEGFHDESTQVQLQLLTAIVK.L                                      |
| gi 4557495 ref NF |                          | 2      | 4      | 0.057   | 717     | 82922   | 8.1 | U      |      |   | cleavage stimulation factor subunit 3 isoform 1 [Homo sapiens]            |
| *                 | HsFLAG-Control_HeLa_NE   | 5.5941 | 0.4046 | 1738.87 | 1739.02 | 6922.7  | 1   | 2018.9 | 80   | 3 | R.FLAFESNIGDLASILK.V                                                      |
| *                 | HsFLAG-Control_HeLa_NE   | 3.5518 | 0.4149 | 2436.72 | 2437.75 | 10100.5 | 1   | 797.8  | 37.5 | 1 | R.IITGGAPELAVEGNPVESNAVLTK.A                                              |
| gi 41146847 ref X |                          | 2      | 4      | 0.057   | 581     | 62543   | 9.4 | U      |      |   | PREDICTED: hypothetical protein LOC57606 isoform 1 [Homo sapiens]         |
| gi 88979579 ref X |                          | 2      | 4      | 0.07    | 469     | 51384   | 8.8 | U      |      |   | PREDICTED: hypothetical protein LOC57606 isoform 9 [Homo sapiens]         |
| gi 88979572 ref X |                          | 2      | 4      | 0.057   | 581     | 62543   | 9.4 | U      |      |   | PREDICTED: hypothetical protein LOC57606 isoform 6 [Homo sapiens]         |
| gi 88974131 ref X |                          | 2      | 4      | 0.07    | 469     | 51384   | 8.8 | U      |      |   | PREDICTED: hypothetical protein LOC57606 isoform 3 [Homo sapiens]         |
|                   | HsFLAG-Control_293_Ti_2( | 3.7649 | 0.2917 | 1497.7  | 1497.65 | 7257.8  | 2   | 867.4  | 56.2 | 3 | R.SGAVQQAGSLGPGSPVR.A                                                     |
|                   | HsFLAG-Control_MG_293_   | 2.7314 | 0.262  | 1737.89 | 1738.94 | 6181.8  | 4   | 371.1  | 46.7 | 1 | R.LSLQGHPTDLQTSNVK.N                                                      |
| gi 23510379 ref N |                          | 3      | 7      | 0.056   | 890     | 101310  | 5   | U      |      |   | transportin 1 [Homo sapiens]                                              |
| gi 23510381 ref N |                          | 3      | 7      | 0.056   | 890     | 101310  | 5   | U      |      |   | transportin 1 [Homo sapiens]                                              |
|                   | HsFLAG-Control_HeLa_NE   | 4.4075 | 0.3855 | 2473.57 | 2473.83 | 3927    | 1   | 538.9  | 52.6 | 5 | K.LEQLNQYPDFNNYLIFVLTK.L                                                  |
|                   | HsFLAG-Control_HeLa_S1(  | 3.6736 | 0.4336 | 1676.07 | 1675.8  | 8464.3  | 1   | 1361.4 | 67.9 | 1 | K.SECLNNIGDSSPLIR.A                                                       |
|                   | HsFLAG-Control_HeLa_S1(  | 2.6286 | 0.2264 | 1804.74 | 1805.04 | 8689.3  | 1   | 790.6  | 53.6 | 1 | R.YAHWVVSQPPDPTYLK.P                                                      |
| gi 55749689 ref N |                          | 3      | 5      | 0.056   | 891     | 97792   | 4.6 | U      |      |   | hypothetical protein LOC22870 [Homo sapiens]                              |
| *                 | HsFLAG-Control_293_Ti_1( | 4.9045 | 0.4333 | 2293.14 | 2291.65 | 11341.8 | 1   | 1436.4 | 52.5 | 1 | R.LYGFLQSTGSLNPLLASFFSK.V                                                 |
| *                 | HsFLAG-Control_293_Ti_2( | 3.2374 | 0.1526 | 1130.41 | 1130.29 | 7306.9  | 1   | 1398.8 | 85   | 3 | R.VAGALVQNTEK.G                                                           |



|                          |        |        |         |         |         |       |                                                                             |
|--------------------------|--------|--------|---------|---------|---------|-------|-----------------------------------------------------------------------------|
| gi 71040090 ref N        | 2      | 6      | 0.054   | 616     | 65323   | 9.3 U | regulatory factor X, 5 [Homo sapiens]                                       |
| HsFLAG-MOCK_300mM_T      | 4.6545 | 0.373  | 1796.31 | 1795.99 | 4177.4  | 1     | 1009 67.6 3 K.RTAEVPVSEASGQAPPAK.A                                          |
| HsFLAG-Control_HeLa_NE   | 4.4403 | 0.383  | 1388.54 | 1388.52 | 7376.7  | 1     | 1451.6 75 3 K.GAVLAQQGQDGTVSK.G                                             |
| gi 51599156 ref N        | 6      | 12     | 0.053   | 1912    | 218003  | 5.9 U | chromodomain helicase DNA binding protein 4 [Homo sapiens]                  |
| HsHeLa3_Ti_106.3111.311  | 4.4414 | 0.4161 | 1901.51 | 1901.22 | 3706    | 1     | 749.4 68.8 3 K.GPFLVSAPLSTIINWER.E                                          |
| HsHeLa3_Ti_102.3199.319  | 3.6713 | 0.3572 | 2479.06 | 2479.59 | 6380    | 1     | 1041.8 52.5 2 R.NQDETEDELQGMNEYLSSFK.V                                      |
| HsHeLa3_Ti_102.1610.161  | 4.4474 | 0.4    | 2304.88 | 2304.39 | 6650.6  | 1     | 945.1 52.4 2 K.STAPETAICTQAPAPASEDEK.V                                      |
| HsHeLa3_Ti_104.1941.194  | 4.1784 | 0.3933 | 2206.84 | 2206.45 | 4365.5  | 1     | 465.9 50 1 R.AAYLNMSSEDPSPHMALNTR.F                                         |
| HsHeLa3_Ti_106.1736.173  | 3.3318 | 0.2573 | 850.94  | 850.008 | 6119.2  | 3     | 1098.6 92.9 2 K.PANAVLHK.V                                                  |
| HsFLAG-Control_HeLa_NE   | 3.2172 | 0.245  | 1422.2  | 1422.54 | 8020.4  | 4     | 888.3 62.5 2 R.APEPTPQQVAQQQ.-                                              |
| gi 8923609 ref NF        | 2      | 7      | 0.053   | 608     | 68183   | 6.3 U | nuclear protein localization 4 [Homo sapiens]                               |
| HsFLAG-Control_HeLa_NE   | 5.2272 | 0.4691 | 2023.49 | 2024.24 | 6554.6  | 1     | 1165 64.7 5 K.VFGAPNVVEDEIDQYLSK.Q                                          |
| HsFLAG-Control_HeLa_NE   | 4.0536 | 0.4589 | 1678.85 | 1678.79 | 4632.6  | 1     | 767 69.2 2 K.ESSSEQYVPDVFYK.D                                               |
| gi 54873624 ref N        | 2      | 2      | 0.053   | 585     | 64990   | 8.9 U | CDA02 protein [Homo sapiens]                                                |
| HsFLAG-Control_HeLa_S10  | 2.8996 | 0.2381 | 2381.64 | 2380.54 | 10052.5 | 1     | 941.9 44.7 1 R.NVNNEVHFFENNNFNTIANK.L                                       |
| HsFLAG-Control_HeLa_S10  | 3.1871 | 0.1467 | 1215.5  | 1215.44 | 7187.2  | 3     | 699.7 65 1 K.VATAYRPPALR.N                                                  |
| gi 28144916 ref N        | 1      | 2      | 0.053   | 246     | 28383   | 8.7 U | hypothetical protein LOC55957 [Homo sapiens]                                |
| HsHeLa3_Ti_103.3855.385  | 3.1663 | 0.2226 | 1544.35 | 1544.76 | 6184.4  | 1     | 931.3 70.8 2 R.NQLDAVLQCLLEK.S                                              |
| gi 7657351 ref NF        | 4      | 9      | 0.052   | 1328    | 148850  | 9.2 U | MYB binding protein 1a [Homo sapiens]                                       |
| HsFLAG-Control_HeLa_NE   | 3.7018 | 0.1768 | 2485.63 | 2484.9  | 6375.4  | 1     | 379.4 35.7 1 K.ADLNIISSPEQLELFLLAQQK.V                                      |
| HsFLAG-MOCK_300mM_T      | 4.675  | 0.4117 | 2105.27 | 2105.4  | 11604   | 1     | 2156.9 61.1 6 R.EAVSSAFFSLLQTLSTQFK.Q                                       |
| HsFLAG-Control_MG_293_   | 3.2406 | 0.2771 | 1317.4  | 1317.53 | 7418.4  | 1     | 998.8 72.7 1 R.VYSTALSSFLTK.R                                               |
| HsFLAG-MOCK_300mM_T      | 2.9346 | 0.3434 | 1522.92 | 1522.7  | 5449    | 4     | 368.5 53.3 1 K.SPAPGAPTRSPSTPAK.S                                           |
| gi 62460637 ref N        | 3      | 5      | 0.052   | 1081    | 118715  | 5 U   | importin 4 [Homo sapiens]                                                   |
| HsFLAG-Control_HeLa_S10  | 4.5743 | 0.3224 | 2180.24 | 2179.52 | 7484.4  | 1     | 1296.7 55.3 2 R.LLNETLGEVGSPLLFFYSLR.T                                      |
| HsFLAG-Control_HeLa_S10  | 3.5223 | 0.339  | 2110.46 | 2110.42 | 7179.1  | 1     | 706.7 50 2 R.EDLQPVQIQSLETGLVLAR.A                                          |
| HsFLAG-Control_293_Ti_20 | 2.5996 | 0.1102 | 1852.9  | 1852.14 | 10830.4 | 1     | 762 46.9 1 R.LLPVLLSTAQEAPEVR.S                                             |
| gi 4505541 ref NF        | 3      | 6      | 0.052   | 962     | 107907  | 4.9 U | vesicle docking protein p115 [Homo sapiens]                                 |
| HsFLAG-Control_HeLa_NE   | 2.7143 | 0.2965 | 1743.51 | 1742.92 | 10027.8 | 2     | 778.8 53.6 1 R.QSEDLGSQFTEIFIK.Q                                            |
| HsFLAG-Control_HeLa_NE   | 4.8926 | 0.4486 | 1810.43 | 1810.87 | 10329.8 | 1     | 1819.2 61.8 4 K.SSQTSGTNEQSSAIVSAR.D                                        |
| HsFLAG-Control_HeLa_NE   | 3.3277 | 0.2573 | 1877.68 | 1878.04 | 12381.8 | 1     | 895.7 46.9 1 K.EQLDSSNSTIAILQTEK.D                                          |
| gi 21618338 ref N        | 2      | 2      | 0.052   | 769     | 87981   | 6.3 U | signal transducer and activator of transcription 3 isoform 2 [Homo sapiens] |
| gi 47458820 ref N        | 2      | 2      | 0.055   | 722     | 83126   | 7.1 U | signal transducer and activator of transcription 3 isoform 3 [Homo sapiens] |
| gi 21618340 ref N        | 2      | 2      | 0.052   | 770     | 88068   | 6.3 U | signal transducer and activator of transcription 3 isoform 1 [Homo sapiens] |
| HsFLAG-Control_HeLa_S10  | 3.1737 | 0.3482 | 1762.79 | 1761.98 | 7979    | 1     | 781.4 57.7 1 R.FLQESNVLYQHNL.R                                              |
| HsFLAG-Control_HeLa_S10  | 3.9232 | 0.3264 | 2576.87 | 2577.86 | 6369.9  | 1     | 706.8 29 1 R.LLQTAATAAQGGQANHPTAAVVTEK.Q                                    |
| gi 7657581 ref NF        | 2      | 2      | 0.052   | 675     | 74176   | 8.6 U | solute carrier family 25, member 13 (citrin) [Homo sapiens]                 |
| HsFLAG-Control_MG_293_   | 3.0117 | 0.2113 | 1509.65 | 1507.69 | 8475.8  | 1     | 1030.7 70.8 1 R.YLNIFGESQPNPK.T                                             |
| HsFLAG-Control_293_Ti_20 | 3.537  | 0.3869 | 2107.39 | 2106.47 | 7904.9  | 1     | 868.6 45.2 1 R.FGLGSVAVGATAVPIDLVK.T                                        |
| gi 13376212 ref N        | 1      | 2      | 0.052   | 404     | 44863   | 4.8 U | ubiquitin-activating enzyme E1-domain containing 1 isoform 1 [Homo sapiens] |
| gi 38327032 ref N        | 1      | 2      | 0.06    | 348     | 38537   | 4.8 U | ubiquitin-activating enzyme E1-domain containing 1 isoform 2 [Homo sapiens] |
| HsFLAG-Control_HeLa_S10  | 3.8331 | 0.2657 | 2216.63 | 2216.54 | 5578.8  | 1     | 445.5 47.5 2 K.NFSGPVPDLPEGITVAYTIPK.K                                      |
| gi 28872796 ref N        | 1      | 2      | 0.052   | 345     | 36106   | 8.3 U | CCAAT/enhancer binding protein beta [Homo sapiens]                          |
| HsHeLa3_Ti_105.1474.147  | 5.3614 | 0.4639 | 1757.83 | 1757.95 | 7692.1  | 1     | 2227.8 73.5 2 K.APPTACYAGAAPAPSQVK.S                                        |
| gi 31652240 ref N        | 4      | 5      | 0.051   | 1505    | 164312  | 6 U   | CCAAT displacement protein isoform a [Homo sapiens]                         |
| HsHeLa3_Ti_103.3667.366  | 3.0465 | 0.3286 | 2174.18 | 2173.56 | 3975.5  | 1     | 355.4 44.7 1 R.LIDVDPVPALDLGQQQLK.V                                         |
| HsHeLa3_Ti_105.2219.221  | 3.925  | 0.2782 | 2132.02 | 2131.35 | 8069.1  | 1     | 1393.9 61.1 2 K.LRENSASQISQLEQQLSAK.N                                       |
| HsFLAG-Control_HeLa_NE   | 3.4874 | 0.3624 | 2091.79 | 2091.41 | 8456.8  | 1     | 775.5 47.4 1 R.LFGETILGLTQGSVSDLLAR.P                                       |
| HsHeLa3_Ti_106.2583.258  | 4.0843 | 0.3866 | 1859.93 | 1858.11 | 7604.4  | 1     | 1055.9 61.8 1 R.RPSSLQSLFGLPEAAGAR.D                                        |

|                            |        |        |         |         |         |        |                                                                                                  |
|----------------------------|--------|--------|---------|---------|---------|--------|--------------------------------------------------------------------------------------------------|
| gi 4503539 ref NF          | 2      | 3      | 0.051   | 907     | 102362  | 7.1 U  | eukaryotic translation initiation factor 4 gamma, 2 [Homo sapiens]                               |
| * HsHeLa3_Ti_104.3801.380  | 3.7227 | 0.2962 | 3148.39 | 3147.57 | 10132.5 | 1      | 904.8 25.8 1 K.MDRDPLGGLADMFGQMPGSGIGTGPGVIQDR.F                                                 |
| * HsFLAG-Control_HeLa_NE   | 2.9762 | 0.1548 | 1579.52 | 1579.84 | 6408.2  | 1      | 603.2 57.1 2 R.TQTPPLGQTPQLGLK.T                                                                 |
| gi 55770844 ref N          | 2      | 4      | 0.051   | 906     | 100071  | 6.3 U  | catenin, alpha 1 [Homo sapiens]                                                                  |
| * HsFLAG-Control_HeLa_NE   | 3.9668 | 0.4152 | 3202.99 | 3202.5  | 7777.7  | 1      | 1275.7 32.1 3 R.VLTDVDDITSIDDFLAVSENHILEDV/NK.C                                                  |
| * HsFLAG-Control_HeLa_NE   | 2.7217 | 0.1492 | 1821.7  | 1819.92 | 11683.5 | 2      | 797.6 46.9 1 R.TSVQTEDDQLIAGQSR.A                                                                |
| gi 21361114 ref N          | 1      | 3      | 0.051   | 314     | 34062   | 9.9 U  | solute carrier family 25 (mitochondrial carrier; oxoglutarate carrier), member 11 [Homo sapiens] |
| * HsFLAG-Control_293_Ti_2( | 5.3125 | 0.5082 | 1637.01 | 1636.85 | 10456.6 | 1      | 2856 80 3 R.AVVVNAAQLASYSQSK.Q                                                                   |
| gi 23510448 ref N          | 3      | 11     | 0.05    | 734     | 82286   | 8.4 U  | minichromosome maintenance deficient protein 5 [Homo sapiens]                                    |
| * HsFLAG-Control_293_Ti_2( | 3.4591 | 0.2131 | 1417.4  | 1417.69 | 3512.4  | 1      | 688.5 79.2 2 R.LAALPNVYEVISK.S                                                                   |
| * HsFLAG-Control_MG_293_   | 4.1649 | 0.2926 | 1165.27 | 1165.34 | 7055.3  | 1      | 1924.6 90 4 K.AIACLLFGGSR.K                                                                      |
| * HsFLAG-Control_MG_293_   | 3.8953 | 0.2758 | 1352.77 | 1352.5  | 9044.5  | 1      | 932.4 62.5 5 R.CSVLAAANSVFGR.W                                                                   |
| gi 4502563 ref NF          | 1      | 2      | 0.05    | 700     | 80007   | 5 U    | calpain 2, large subunit [Homo sapiens]                                                          |
| * Hs293FLP-MG_Ti_203.449   | 4.107  | 0.3322 | 3977.12 | 3977.39 | 8334.2  | 7      | 401.5 18.4 2 K.YLNQDYEARNECLEAGTLFQDPSFPAIPALGFK.E                                               |
| gi 4885225 ref NF          | 2      | 7      | 0.05    | 656     | 68478   | 9.3 U  | Ewing sarcoma breakpoint region 1 isoform EWS [Homo sapiens]                                     |
| gi 7669490 ref NF          | 2      | 7      | 0.057   | 583     | 61287   | 9.1 U  | Ewing sarcoma breakpoint region 1 isoform EWS-b [Homo sapiens]                                   |
| HsFLAG-Control_HeLa_NE     | 3.7839 | 0.3421 | 1451.15 | 1451.53 | 5493    | 1      | 1086.3 73.1 5 K.GDATVSYEDPPTAK.A                                                                 |
| HsFLAG-MOCK_300mM_T        | 4.9716 | 0.4413 | 2235.2  | 2236.3  | 4457.2  | 1      | 1175.9 72.2 2 R.AGDWQCPNPGCGNQFAWR.T                                                             |
| gi 24308207 ref N          | 2      | 3      | 0.05    | 583     | 63473   | 8.3 U  | leucine rich repeat containing 47 [Homo sapiens]                                                 |
| * HsFLAG-Control_HeLa_S1(  | 4.0547 | 0.4624 | 1773.97 | 1773.09 | 6591.4  | 1      | 886.3 58.8 2 R.NALGPGLSPELGPLPALR.V                                                              |
| * HsFLAG-Control_HeLa_NE   | 3.1391 | 0.2206 | 1184.66 | 1184.34 | 6524.9  | 1      | 800.8 75 1 R.TAATLATHLR.A                                                                        |
| gi 4506013 ref NF          | 1      | 2      | 0.05    | 360     | 41564   | 4.9 U  | protein phosphatase 1, regulatory subunit 7 [Homo sapiens]                                       |
| * HsFLAG-Control_HeLa_S1(  | 4.0427 | 0.4459 | 1991.76 | 1992.28 | 10280.7 | 1      | 1207.2 55.9 2 R.AIENIDTLTNLESLFLGK.N                                                             |
| gi 33469917 ref N          | 3      | 3      | 0.049   | 863     | 96558   | 6.7 U  | minichromosome maintenance protein 4 [Homo sapiens]                                              |
| gi 33469919 ref N          | 3      | 3      | 0.049   | 863     | 96558   | 6.7 U  | minichromosome maintenance protein 4 [Homo sapiens]                                              |
| HsHeLa3_Ti_105.1162.116    | 2.5732 | 0.1297 | 1101.09 | 1100.22 | 6283.9  | 2      | 720 83.3 1 R.QRPDLGSAQK.G                                                                        |
| HsHeLa3_Ti_104.4224.422    | 2.674  | 0.1353 | 2142.38 | 2142.48 | 7065.2  | 1      | 507.9 44.4 1 R.NLNPEDIDQLITISGMVIR.T                                                             |
| Hs293FLP_TREX_Ti_102.2     | 2.9899 | 0.3402 | 1366.31 | 1366.51 | 5282.7  | 1      | 733.1 66.7 1 R.ALADDDFLTVTGK.T                                                                   |
| gi 68509926 ref N          | 2      | 3      | 0.049   | 795     | 90933   | 7.5 U  | DEAH (Asp-Glu-Ala-His) box polypeptide 15 [Homo sapiens]                                         |
| * HsHeLa3_Ti_106.1510.151  | 2.5837 | 0.0999 | 1046.49 | 1045.15 | 5670.7  | 1      | 878.2 93.8 2 K.RGVACTQPR.R                                                                       |
| * HsHeLa_Control-MG_Ti_20  | 4.1102 | 0.2318 | 3550.04 | 3552.02 | 7324.7  | 3      | 382.3 21.6 1 K.DNQVVQLHPSTVLDHKPEWVLYNEFVLTTK.N                                                  |
| gi 4758410 ref NF          | 3      | 6      | 0.049   | 673     | 74128   | 6.1 U  | fragile X mental retardation syndrome related protein 2 [Homo sapiens]                           |
| * Hs293FLP_TREX_Ti_102.2   | 2.891  | 0.219  | 1617.68 | 1617.73 | 3406.5  | 3      | 382.1 62.5 1 R.ANEQEPCGWWLAR.V                                                                   |
| * Hs293FLP_TREX_Ti_106.2   | 3.4958 | 0.3492 | 1321.62 | 1320.58 | 7004.8  | 1      | 1218.5 77.3 3 R.LRPVNPPLATK.G                                                                    |
| Hs293FLP_TREX_Ti_102.1     | 2.1428 | 0.1072 | 943.49  | 944.116 | 6968.5  | 3      | 643.7 71.4 2 K.VIQEIVDK.S                                                                        |
| gi 18379334 ref N          | 1      | 7      | 0.049   | 305     | 34208   | 11.8 U | RNA-binding protein S1, serine-rich domain [Homo sapiens]                                        |
| gi 6857826 ref NF          | 1      | 7      | 0.049   | 305     | 34208   | 11.8 U | RNA-binding protein S1, serine-rich domain [Homo sapiens]                                        |
| HsFLAG-Control_HeLa_NE     | 4.7284 | 0.4565 | 1761.18 | 1761.84 | 7184.3  | 1      | 1917.5 78.6 7 K.GYAYVEFENPDEAEK.A                                                                |
| gi 8922491 ref NF          | 1      | 2      | 0.049   | 247     | 27951   | 9.7 U  | transmembrane protein 33 [Homo sapiens]                                                          |
| * HsFLAG-Control_MG_293_   | 4.4062 | 0.3988 | 1214.24 | 1214.45 | 9738    | 1      | 2157.6 86.4 2 R.ALLANALTSALR.L                                                                   |
| gi 89038202 ref X          | 5      | 6      | 0.048   | 1563    | 169040  | 6 U    | PREDICTED: MAX dimerization protein 5 isoform 4 [Homo sapiens]                                   |
| gi 89038899 ref X          | 5      | 6      | 0.048   | 1563    | 169040  | 6 U    | PREDICTED: similar to MAX-interacting protein isoform 8 [Homo sapiens]                           |
| HsFlag1P_Ti_104.2463.246   | 2.7234 | 0.1207 | 1490.31 | 1490.74 | 5338.9  | 6      | 600.5 60.7 1 K.TTGITTPVASVAFPK.S                                                                 |
| HsF-IP-293-MG_Ti_102.24    | 4.0219 | 0.3815 | 2396.96 | 2397.52 | 9038.1  | 1      | 1357 55 2 K.TCQENSDFVQQEQGISDLLGK.S                                                              |
| HsF-IP-293-MG_Ti_103.19    | 2.838  | 0.2575 | 1288.42 | 1288.49 | 5452.6  | 1      | 804.6 72.7 1 R.ISNPSAFSIVPR.R                                                                    |
| HsFLAG-Control_HeLa_NE     | 2.8288 | 0.0956 | 1523.65 | 1523.64 | 9297.1  | 1      | 787.9 57.7 1 R.AFSEIQGLTDQADK.L                                                                  |
| Hs293FLP_TREX_Ti_104.2     | 2.581  | 0.2606 | 1388.51 | 1388.65 | 6845.5  | 2      | 625.2 58.3 1 R.VTLGPTQVFLANK.D                                                                   |
| gi 4503251 ref NF          | 2      | 3      | 0.048   | 770     | 82588   | 5.7 U  | disabled homolog 2 [Homo sapiens]                                                                |

|                   |                          |        |        |         |         |        |      |        |      |   |                                                                                               |
|-------------------|--------------------------|--------|--------|---------|---------|--------|------|--------|------|---|-----------------------------------------------------------------------------------------------|
| *                 | HsHeLa3_Ti_106.1794.179  | 3.0735 | 0.3185 | 1361.49 | 1360.51 | 6327.8 | 1    | 1067.9 | 77.3 | 2 | K.TGVIEHEHPVNK.I                                                                              |
| *                 | HsHeLa3_Ti_102.3090.309  | 3.2848 | 0.4544 | 2668.96 | 2669.89 | 4377.8 | 1    | 403.4  | 41.7 | 1 | K.SGVDQMDLFGDMSTPPDLNSPTESK.D                                                                 |
| gi 33667028 ref N |                          | 1      | 2      | 0.048   | 587     | 61099  | 8.8  | U      |      |   | interferon regulatory factor 2 binding protein 2 [Homo sapiens]                               |
| *                 | HsHeLa3_Ti_104.2212.221  | 5.0015 | 0.417  | 2494.84 | 2495.75 | 9275   | 1    | 1543.3 | 46.3 | 2 | R.AAASLAAVSGTAAASLGSAQPTDLGAHK.R                                                              |
| gi 13540586 ref N |                          | 1      | 2      | 0.048   | 518     | 57341  | 5.2  | U      |      |   | hypothetical protein LOC81556 [Homo sapiens]                                                  |
| gi 89039134 ref X |                          | 1      | 2      | 0.052   | 483     | 53627  | 5.2  | U      |      |   | PREDICTED: similar to CG4785-PA [Homo sapiens]                                                |
|                   | HsFLAG-Control_HeLa_NE   | 2.9165 | 0.2075 | 2582.14 | 2579.56 | 9486   | 1    | 776.1  | 39.6 | 2 | K.EGDEVTGITDDNEDENSANQIAGK.I                                                                  |
| gi 4503747 ref NF |                          | 7      | 16     | 0.047   | 2602    | 278193 | 5.7  | U      |      |   | filamin B, beta (actin binding protein 278) [Homo sapiens]                                    |
|                   | HsHeLa_Control-MG_Ti_20  | 4.0112 | 0.3224 | 1227.4  | 1227.53 | 5098.2 | 1    | 1284   | 90   | 3 | R.LIALLEVLSQK.R                                                                               |
| *                 | HsHeLa3_Ti_105.3086.308  | 4.5288 | 0.4415 | 2048.91 | 2049.29 | 4010.1 | 1    | 771.9  | 68.8 | 4 | K.IPYLPITNFNQNWQDQK.A                                                                         |
| *                 | HsHeLa3_Ti_104.1868.186  | 2.9744 | 0.2222 | 1905.81 | 1906.04 | 6323.2 | 1    | 618.3  | 50   | 1 | K.SPFVVQVGEACPNACR.A                                                                          |
| *                 | HsFLAG-Control_HeLa_S1(  | 3.8963 | 0.3687 | 2099.99 | 2098.28 | 8233.5 | 1    | 1083.7 | 55.9 | 1 | K.DFLDGVYAFEYYPSTPGR.Y                                                                        |
| *                 | HsFLAG-Control_HeLa_S1(  | 3.1392 | 0.3426 | 1769.74 | 1768.02 | 9302.6 | 5    | 583.6  | 46.9 | 1 | K.APLNVQFNSPLPGDAVK.D                                                                         |
| *                 | HsHeLa_Control-MG_Ti_20  | 3.5012 | 0.3731 | 2548.67 | 2548.86 | 5244.9 | 1    | 544.6  | 40   | 4 | K.VTASGPGSSYGVASPLPVDFDAIDAR.D                                                                |
| *                 | HsFLAG-Control_HeLa_S1(  | 3.0305 | 0.3228 | 1645.9  | 1645.86 | 8978.6 | 1    | 858.9  | 56.7 | 2 | R.APSVATVGSICDLNLK.I                                                                          |
| gi 61744475 ref N |                          | 2      | 4      | 0.047   | 661     | 71123  | 5    | U      |      |   | solute carrier family 3 (activators of dibasic and neutral amino acid transport), member 2 is |
| gi 65506891 ref N |                          | 2      | 4      | 0.049   | 630     | 67994  | 5    | U      |      |   | solute carrier family 3 (activators of dibasic and neutral amino acid transport), member 2 is |
| gi 61744483 ref N |                          | 2      | 4      | 0.059   | 529     | 57945  | 5.3  | U      |      |   | solute carrier family 3 (activators of dibasic and neutral amino acid transport), member 2 is |
| gi 61744481 ref N |                          | 2      | 4      | 0.055   | 568     | 61816  | 5.2  | U      |      |   | solute carrier family 3 (activators of dibasic and neutral amino acid transport), member 2 is |
| gi 61744479 ref N |                          | 2      | 4      | 0.052   | 599     | 64873  | 5.1  | U      |      |   | solute carrier family 3 (activators of dibasic and neutral amino acid transport), member 2 is |
| gi 61744477 ref N |                          | 2      | 4      | 0.049   | 631     | 68101  | 5    | U      |      |   | solute carrier family 3 (activators of dibasic and neutral amino acid transport), member 2 is |
|                   | HsHeLa_Control-MG_Ti_20  | 3.9866 | 0.3746 | 1867.22 | 1868.1  | 10204  | 1    | 1100   | 50   | 2 | R.IGDLQAFQGHGAGNLAGLK.G                                                                       |
|                   | HsHeLa_Control-MG_Ti_20  | 3.3859 | 0.2748 | 1373.36 | 1372.69 | 5781.7 | 1    | 753.6  | 68.2 | 2 | R.LLTSFLPAQLLR.L                                                                              |
| gi 4505257 ref NF |                          | 2      | 5      | 0.047   | 577     | 67820  | 6.4  | U      |      |   | moesin [Homo sapiens]                                                                         |
| *                 | HsHeLa3_Ti_103.4003.400  | 3.0576 | 0.4331 | 2083.1  | 2083.26 | 10433  | 1    | 1283.2 | 59.4 | 2 | K.FYPEDVSEELIQDITQR.L                                                                         |
|                   | Hs293FLP_TREX_Ti_103.2   | 3.2866 | 0.3333 | 1182.58 | 1183.35 | 5407.2 | 1    | 745.5  | 72.2 | 3 | K.APDFVYAPR.L                                                                                 |
| gi 15420883 gb A  |                          | 2      | 2      | 0.047   | 557     | 59909  | 8.2  | U      |      |   | neuralized [Mus musculus]                                                                     |
| *                 | HsFLAG-Control_293_Ti_2( | 4.0718 | 0.4605 | 1819.28 | 1819.11 | 9498.3 | 1    | 1438.1 | 63.3 | 1 | R.TVDPLWALVDVYGLTR.G                                                                          |
| *                 | HsFLAG-Control_MG_293_   | 3.0796 | 0.3122 | 1120.81 | 1121.34 | 5164.7 | 1    | 977    | 88.9 | 1 | R.ILGSTIMTER.G                                                                                |
| gi 21735596 ref N |                          | 2      | 4      | 0.047   | 469     | 51735  | 5.2  | U      |      |   | programmed cell death 4 isoform 1 [Homo sapiens]                                              |
| gi 21735598 ref N |                          | 2      | 4      | 0.048   | 458     | 50576  | 5.5  | U      |      |   | programmed cell death 4 isoform 2 [Homo sapiens]                                              |
|                   | HsFLAG-Control_HeLa_NE   | 3.1274 | 0.2416 | 1240.01 | 1240.4  | 4818   | 1    | 767.4  | 80   | 1 | K.DLPELALDTPR.A                                                                               |
|                   | HsFLAG-Control_HeLa_NE   | 3.7957 | 0.1344 | 1200.36 | 1200.43 | 5287.8 | 1    | 1441.6 | 90   | 3 | R.APQLVGQFIAR.A                                                                               |
| gi 51475836 ref X |                          | 3      | 6      | 0.046   | 762     | 86115  | 8.7  | U      |      |   | PREDICTED: dpy-19-like 1 [Homo sapiens]                                                       |
| gi 89026863 ref X |                          | 3      | 6      | 0.046   | 762     | 86157  | 8.7  | U      |      |   | PREDICTED: similar to dpy-19-like 1, like [Homo sapiens]                                      |
| gi 89025889 ref X |                          | 3      | 6      | 0.046   | 762     | 86115  | 8.7  | U      |      |   | PREDICTED: similar to dpy-19-like 1, like [Homo sapiens]                                      |
|                   | HsFLAG-Control_MG_293_   | 3.6327 | 0.2883 | 1404.61 | 1404.69 | 4494.9 | 1    | 893.5  | 81.8 | 3 | K.LTEYPLVINTLK.R                                                                              |
|                   | HsFLAG-Control_293_Ti_1( | 2.6211 | 0.2074 | 1771.87 | 1772.06 | 8368.2 | 1    | 576.4  | 57.7 | 1 | R.FNLYPEVILASWYR.I                                                                            |
|                   | HsFLAG-Control_MG_293_   | 2.8069 | 0.1811 | 1058.27 | 1058.27 | 6299.7 | 1    | 1025.1 | 87.5 | 2 | K.TPLCNLLVK.D                                                                                 |
| gi 54607120 ref N |                          | 2      | 10     | 0.046   | 710     | 78182  | 8.1  | U      |      |   | lactotransferrin [Homo sapiens]                                                               |
| gi 88967530 ref X |                          | 2      | 10     | 0.064   | 512     | 56162  | 6.8  | U      |      |   | PREDICTED: similar to lactotransferrin [Homo sapiens]                                         |
|                   | HsFLAG-Control_293_Ti_1( | 4.2475 | 0.4482 | 2089.01 | 2089.36 | 8589.3 | 1    | 1422.8 | 58.3 | 5 | R.IDSGLYLGSYFTAIQNLK.K                                                                        |
|                   | HsFLAG-Control_Hela_Ti_1 | 3.9714 | 0.3525 | 1537.34 | 1537.8  | 7809.3 | 1    | 1181.9 | 69.2 | 5 | K.YLGPQYVAGITNLK.K                                                                            |
| gi 8922358 ref NF |                          | 1      | 2      | 0.046   | 546     | 64441  | 10.5 | U      |      |   | PRP38 pre-mRNA processing factor 38 (yeast) domain containing B [Homo sapiens]                |
| *                 | HsGST-MOCK_Ti_304.014:   | 3.1302 | 0.4013 | 3104.09 | 3105.29 | 5211.7 | 1    | 319    | 35.4 | 2 | R.YTQPPTDLWDFESFLDDEEDLDVK.A                                                                  |
| gi 20373175 ref N |                          | 2      | 2      | 0.046   | 328     | 35197  | 8.5  | U      |      |   | musashi 2 isoform a [Homo sapiens]                                                            |
| gi 25121993 ref N |                          | 2      | 2      | 0.06    | 251     | 28421  | 8.5  | U      |      |   | musashi 2 isoform b [Homo sapiens]                                                            |
|                   | HsHeLa3_Ti_103.2903.290  | 2.2833 | 0.3164 | 1558.62 | 1558.73 | 5044.9 | 1    | 329.7  | 46.4 | 1 | R.GFGFVTFADPASVDK.V                                                                           |
|                   | HsHeLa3_Ti_103.2896.289  | 4.1432 | 0.324  | 1559.04 | 1558.73 | 5748.4 | 1    | 1297.4 | 75   | 1 | R.GFGFVTFADPASVDK.V                                                                           |

|                          |        |        |         |         |         |     |        |                                                                                |                                         |
|--------------------------|--------|--------|---------|---------|---------|-----|--------|--------------------------------------------------------------------------------|-----------------------------------------|
| gi 57864582 ref N        | 8      | 28     | 0.045   | 2850    | 282389  | 10  | U      | hornerin [Homo sapiens]                                                        |                                         |
| HsFLAG-MOCK_300mM_T      | 3.2709 | 0.3643 | 1562.01 | 1562.61 | 9018.9  | 1   | 1055.5 | 60                                                                             | 1 R.GRHGSGSGQSPGHGQR.G                  |
| HsFLAG-Control_HeLa_NE   | 5.3604 | 0.4902 | 1585.75 | 1585.63 | 9758.4  | 1   | 2397.6 | 76.7                                                                           | 12 R.GPYESGSGHSSGLGHR.E                 |
| Hs293FLP_Ti_304.1486.14  | 5.2148 | 0.5014 | 2351.04 | 2350.34 | 5289.1  | 1   | 932.2  | 52.2                                                                           | 6 R.HGSGSGQSSSYSPYSGSGWSSSR.G           |
| HsFLAG-MOCK_300mM_T      | 4.6562 | 0.3482 | 2726.9  | 2726.67 | 7906.9  | 1   | 1043.6 | 30.6                                                                           | 2 R.SGQSSRGEQHGSSSGSSSYQHSGSGR.Q        |
| HsFLAG-Control_HeLa_Ti_1 | 4.6769 | 0.4669 | 2122.77 | 2124.06 | 8984.4  | 1   | 1127   | 50                                                                             | 2 R.GEQHGSSSGSSSYQHSGSGR.Q              |
| HsFLAG-Control_HeLa_Ti_1 | 5.8706 | 0.5712 | 2319.72 | 2320.31 | 9109.1  | 1   | 1687.8 | 56.5                                                                           | 2 R.HGSGSGQSSSYGYSGSGWSSSR.G            |
| HsHeLa_Control-MG_Ti_10  | 3.568  | 0.4411 | 1860.7  | 1860.82 | 7441.1  | 1   | 677.9  | 50                                                                             | 2 R.HGSGSGHSSSHGQHGSGSGR.S              |
| HsFLAG-MOCK_300mM_T      | 3.6793 | 0.3664 | 1861.27 | 1860.82 | 5469.9  | 1   | 720.5  | 36.8                                                                           | 1 R.HGSGSGHSSSHGQHGSGSGR.S              |
| gi 8922328 ref N         | 1      | 2      | 0.045   | 420     | 46896   | 8.5 | U      | RNA binding motif protein 22 [Homo sapiens]                                    |                                         |
| HsHeLa3_Ti_103.3523.352  | 4.2623 | 0.4413 | 2293.24 | 2292.57 | 5858.5  | 1   | 951.8  | 55.6                                                                           | 2 K.NVCQTCLLDLEYGLPIQVR.D               |
| gi 41349454 ref N        | 1      | 3      | 0.045   | 382     | 43810   | 9.4 | U      | proline arginine-rich end leucine-rich repeat protein precursor [Homo sapiens] |                                         |
| gi 4506041 ref N         | 1      | 3      | 0.045   | 382     | 43810   | 9.4 | U      | proline arginine-rich end leucine-rich repeat protein precursor [Homo sapiens] |                                         |
| HsFLAG-MOCK_300mM_T      | 4.1358 | 0.4369 | 2138.78 | 2138.19 | 5069.9  | 1   | 1011.8 | 68.8                                                                           | 3 R.ECYCPPDFPSALYCDNR.N                 |
| gi 29826335 ref N        | 1      | 2      | 0.045   | 333     | 38388   | 5.8 | U      | eukaryotic translation initiation factor 2 beta [Homo sapiens]                 |                                         |
| HsFLAG-Control_HeLa_NE   | 4.0476 | 0.3648 | 1757.61 | 1757.81 | 7695.9  | 1   | 1307.6 | 64.3                                                                           | 2 K.DASDDLDDLNFFNQK.K                   |
| gi 5729953 ref N         | 1      | 6      | 0.045   | 331     | 38243   | 5.4 | U      | nuclear distribution gene C homolog (A. nidulans) [Homo sapiens]               |                                         |
| HsFLAG-Control_HeLa_S1(  | 4.0566 | 0.3709 | 1648.45 | 1646.84 | 5541.3  | 1   | 973.5  | 71.4                                                                           | 6 K.GQPAIIDGELYNEVK.V                   |
| gi 4758012 ref N         | 4      | 7      | 0.044   | 1675    | 191613  | 5.7 | U      | clathrin heavy chain 1 [Homo sapiens]                                          |                                         |
| HsFLAG-Control_HeLa_S1(  | 4.1581 | 0.2614 | 1946.47 | 1946.26 | 5209.8  | 1   | 491.3  | 47.1                                                                           | 2 K.LHIIEVGTPTGNQPFK.K                  |
| HsFLAG-Control_HeLa_S1(  | 3.6923 | 0.3285 | 1971.84 | 1972.21 | 8087.9  | 2   | 769.9  | 50                                                                             | 3 R.LASTLVHLGEYQAAVDGAR.K               |
| HsFLAG-Control_HeLa_S1(  | 3.5128 | 0.3552 | 2355.95 | 2356.55 | 9593.2  | 1   | 529.5  | 42.1                                                                           | 1 K.SVNESLNNLFITEEDYQALR.T              |
| HsFLAG-Control_HeLa_S1(  | 3.0898 | 0.2564 | 1943.32 | 1944.07 | 9704.9  | 1   | 1032.1 | 56.2                                                                           | 1 R.TSIDAYDNFDNISLAQR.L                 |
| gi 4488822 ref N         | 4      | 4      | 0.044   | 1424    | 152587  | 7.3 | U      | hypothetical protein LOC23248 [Homo sapiens]                                   |                                         |
| HsFLAG-Control_HeLa_NE   | 3.9971 | 0.2877 | 1487.41 | 1487.73 | 4456    | 3   | 681.1  | 65.4                                                                           | 1 K.VEITPESILSALS.K                     |
| HsHeLa3_Ti_106.2224.222  | 2.8868 | 0.3006 | 2337.57 | 2337.59 | 7626.8  | 1   | 424.2  | 31.8                                                                           | 1 R.SLFSPQNTLAAPTGHPTSGVEK.V            |
| HsHeLa3_Ti_106.1740.174  | 1.8122 | 0.1203 | 871.58  | 871.971 | 3924.4  | 6   | 349.3  | 71.4                                                                           | 1 K.HFGQAPSK.G                          |
| HsHeLa3_Ti_104.2560.256  | 2.5279 | 0.171  | 1840.94 | 1840.04 | 3203    | 1   | 417    | 56.2                                                                           | 1 R.DAPTHLPSVDLSNPFTK.E                 |
| gi 5454158 ref N         | 2      | 2      | 0.044   | 1264    | 140476  | 7.6 | U      | valyl-tRNA synthetase [Homo sapiens]                                           |                                         |
| Hs293FLP_Ti_303.4554.45  | 4.5357 | 0.3384 | 3908.54 | 3906.38 | 5953.8  | 1   | 476.5  | 22.1                                                                           | 1 K.SLGNVIDPLDVIYGISLQGLHNLNSLDPSEVEK.A |
| HsFLAG-Control_HeLa_S1(  | 2.7304 | 0.1891 | 1970.56 | 1968.13 | 7086.8  | 1   | 509.3  | 47.2                                                                           | 1 K.GFVPSPTSQPGGHESLVD.R                |
| gi 47519639 ref N        | 3      | 3      | 0.044   | 1152    | 121005  | 5.4 | U      | microtubule-associated protein 4 isoform 1 [Homo sapiens]                      |                                         |
| HsGST-MOCK_Ti_403.534    | 3.1499 | 0.3909 | 2225.89 | 2227.43 | 12411.9 | 1   | 1110.4 | 45                                                                             | 1 R.DFIATLEAEAFDDVVGETVGK.T             |
| HsFLAG-Control_293_Ti_2( | 3.0293 | 0.1831 | 1359.21 | 1358.54 | 5934.8  | 2   | 731    | 66.7                                                                           | 1 K.KPTSAKPSSTTPR.L                     |
| HsFLAG-Control_MG_293_   | 3.3953 | 0.2262 | 1591.53 | 1591.81 | 8606.9  | 1   | 799.6  | 53.1                                                                           | 1 K.VGSLDNVGHLPAGGAVK.T                 |
| gi 7662128 ref N         | 2      | 6      | 0.044   | 697     | 78292   | 7.6 | U      | zinc finger and BTB domain containing 24 [Homo sapiens]                        |                                         |
| Hs283FLP_Ti_102.2429.24  | 4.3289 | 0.3732 | 1451.79 | 1450.68 | 6503.8  | 1   | 1389.5 | 75                                                                             | 2 K.STEQILATAQFLK.V                     |
| Hs293FLP_Ti_302.1183.11  | 5.597  | 0.5292 | 1836.56 | 1834.85 | 5861.5  | 1   | 1629.2 | 76.5                                                                           | 4 K.HASDASSISGSSNTEEV.R                 |
| gi 39812378 ref N        | 2      | 2      | 0.044   | 729     | 77847   | 6.8 | U      | RAN binding protein 9 [Homo sapiens]                                           |                                         |
| HsF-IP-293_Ti_206.2204.2 | 3.4053 | 0.3292 | 1784.62 | 1785.01 | 6501.6  | 1   | 1283.3 | 71.4                                                                           | 1 K.RLYPAVDEQETPLPR.S                   |
| HsHeLa_Control-MG_Ti_20  | 2.8666 | 0.2447 | 1939.44 | 1938.2  | 7390.7  | 1   | 634.5  | 53.1                                                                           | 1 R.ATHPIAACGIYFEVK.I                   |
| gi 4506445 ref N         | 1      | 3      | 0.044   | 366     | 40940   | 8.2 | U      | RNA binding motif protein 4 [Homo sapiens]                                     |                                         |
| HsFLAG-Control_HeLa_NE   | 5.0186 | 0.5016 | 1856.22 | 1856.99 | 8869.5  | 1   | 1844   | 70                                                                             | 3 R.VADLTEQYNEQYGAVR.T                  |
| gi 56119128 ref N        | 7      | 10     | 0.043   | 2302    | 262345  | 6.7 | U      | chromodomain helicase DNA binding protein 8 [Homo sapiens]                     |                                         |
| HsHeLa3_Ti_106.2047.204  | 2.2823 | 0.1782 | 1006.69 | 1007.22 | 3985.8  | 2   | 459.2  | 72.2                                                                           | 1 R.HVVLGSLPGK.I                        |
| HsHeLa3_Ti_104.2239.223  | 2.4777 | 0.2401 | 1567.89 | 1568.86 | 5755.9  | 6   | 311.4  | 50                                                                             | 2 K.IVLQGNQLAALTQAK.N                   |
| HsHeLa3_Ti_104.2231.223  | 4.1616 | 0.4324 | 1569.35 | 1568.86 | 6933.5  | 1   | 1277.6 | 67.9                                                                           | 2 K.IVLQGNQLAALTQAK.N                   |
| HsHeLa3_Ti_105.1806.180  | 5.1475 | 0.4056 | 2110.82 | 2111.32 | 6217    | 1   | 738.4  | 45.5                                                                           | 2 K.VLSASEVAALSSPASSAPHS GGK.T          |



|                   |                          |        |        |         |         |        |      |        |      |    |                                                                                                   |
|-------------------|--------------------------|--------|--------|---------|---------|--------|------|--------|------|----|---------------------------------------------------------------------------------------------------|
| *                 | HsHeLa3_Ti_103.2990.2990 | 2.9067 | 0.1666 | 2518.31 | 2518.78 | 5515.4 | 5    | 321.4  | 36.4 | 1  | R.LPPAAGDEPPDPNLFIEPITEER.A                                                                       |
| *                 | HsHeLa3_Ti_105.1887.1887 | 3.2383 | 0.0853 | 1420.66 | 1420.66 | 3923.1 | 1    | 588.2  | 66.7 | 1  | R.LALCQPPGPPELPK.W                                                                                |
| *                 | HsHeLa3_Ti_105.1674.1674 | 2.7816 | 0.2067 | 1592.6  | 1591.85 | 6057.1 | 3    | 573.6  | 53.6 | 1  | R.TASPLLRPDAPVEK.S                                                                                |
| gi 13435359 ref N |                          | 3      | 8      | 0.043   | 1140    | 126988 | 5.3  | U      |      |    | damage-specific DNA binding protein 1 [Homo sapiens]                                              |
| gi 89034790 ref X |                          | 3      | 8      | 0.043   | 1140    | 126968 | 5.3  | U      |      |    | PREDICTED: similar to DNA damage binding protein 1 (Damage-specific DNA binding protein)          |
| gi 89034784 ref X |                          | 3      | 8      | 0.046   | 1057    | 117226 | 5.3  | U      |      |    | PREDICTED: similar to DNA damage binding protein 1 (Damage-specific DNA binding protein)          |
| gi 89034782 ref X |                          | 3      | 8      | 0.043   | 1140    | 126968 | 5.3  | U      |      |    | PREDICTED: similar to DNA damage binding protein 1 (Damage-specific DNA binding protein)          |
|                   | HsGST-MOCK_Ti_304.2990   | 3.9632 | 0.3293 | 2421.08 | 2421.65 | 6515.8 | 1    | 730.9  | 50   | 5  | K.FLYGCQAPTICFVYQDPQGR.H                                                                          |
|                   | HsFLAG-Control_MG_293_   | 2.6227 | 0.1108 | 1100.14 | 1099.4  | 6090.7 | 3    | 858.5  | 77.8 | 1  | K.YLAIAPPIIK.Q                                                                                    |
|                   | HsGST-MOCK_Ti_305.3250   | 3.8728 | 0.2811 | 2180.59 | 2181.56 | 4450.6 | 1    | 354.6  | 44.4 | 2  | R.SVLLLAYKPMEGNFEEIAR.D                                                                           |
| gi 4504341 ref NF |                          | 1      | 2      | 0.043   | 419     | 49513  | 5.7  | U      |      |    | histone acetyltransferase 1 isoform a [Homo sapiens]                                              |
| gi 74319831 ref N |                          | 1      | 2      | 0.054   | 334     | 39786  | 5.9  | U      |      |    | histone acetyltransferase 1 isoform b [Homo sapiens]                                              |
|                   | HsFLAG-Control_HeLa_S10  | 4.7497 | 0.3453 | 2090.1  | 2090.29 | 4344.3 | 1    | 686.4  | 61.8 | 2  | R.YYTEFPTVLDITAEDPSK.S                                                                            |
| gi 57164942 ref N |                          | 4      | 5      | 0.042   | 2032    | 225493 | 7.8  | U      |      |    | colonic and hepatic tumor over-expressed protein isoform a [Homo sapiens]                         |
| gi 57222563 ref N |                          | 4      | 5      | 0.044   | 1972    | 218524 | 8.1  | U      |      |    | colonic and hepatic tumor over-expressed protein isoform b [Homo sapiens]                         |
|                   |                          |        |        |         |         |        |      |        |      |    | K.LEQQQSAGGDAEGGGDDGDEVPQIDAYELLEAVEIL                                                            |
|                   | HsFLAG-Control_HeLa_NE   | 3.5088 | 0.0996 | 3948.49 | 3948.15 | 8579.5 | 1    | 501.7  | 20.3 | 1  | SK.L                                                                                              |
|                   | HsFLAG-Control_HeLa_NE   | 3.3585 | 0.2353 | 1542.98 | 1541.83 | 4584.7 | 7    | 519.2  | 61.5 | 1  | K.FIQPNIGELPTALK.G                                                                                |
|                   | HsFlag1P_Ti_106.2742.274 | 2.7419 | 0.3412 | 2203.65 | 2204.49 | 8377.5 | 1    | 405.5  | 36.8 | 2  | R.NAALNTIVTVYNVHGDQVFK.L                                                                          |
|                   | HsFLAG-Control_HeLa_NE   | 3.8112 | 0.3892 | 1625.66 | 1625.9  | 6583.5 | 1    | 1227.9 | 69.2 | 1  | K.LDDIFEPVLIPEPK.I                                                                                |
| gi 13435361 ref N |                          | 2      | 4      | 0.041   | 894     | 99987  | 5.4  | U      |      |    | desmocollin 1 isoform Dsc1a preproprotein [Homo sapiens]                                          |
| gi 4826702 ref NF |                          | 2      | 4      | 0.044   | 840     | 93835  | 5.5  | U      |      |    | desmocollin 1 isoform Dsc1b preproprotein [Homo sapiens]                                          |
|                   | HsFLAG-Control_Hela_Ti_1 | 3.9112 | 0.5415 | 3070.08 | 3069.48 | 6856.9 | 1    | 753.7  | 40.4 | 3  | K.YEQFALYGYATTADGYAPEYPLPLIIK.I                                                                   |
|                   | HsFLAG-Control_Hela_Ti_1 | 2.7442 | 0.1988 | 1189.1  | 1189.4  | 8718.7 | 4    | 854.9  | 72.2 | 1  | K.ILQQIPDHPK.H                                                                                    |
| gi 4502885 ref NF |                          | 2      | 5      | 0.041   | 490     | 58572  | 9.5  | U      |      |    | CDC-like kinase 3 isoform hck3 [Homo sapiens]                                                     |
| gi 89030229 ref X |                          | 2      | 5      | 0.1     | 201     | 22662  | 9    | U      |      |    | PREDICTED: similar to Dual specificity protein kinase CLK3 (CDC-like kinase 3) [Homo sapiens]     |
| gi 89029200 ref X |                          | 2      | 5      | 0.1     | 201     | 22662  | 9    | U      |      |    | PREDICTED: similar to Dual specificity protein kinase CLK3 (CDC-like kinase 3) [Homo sapiens]     |
|                   | Hs293FLP-MG_Ti_205.444   | 5.464  | 0.3728 | 2225.28 | 2226.58 | 8684.3 | 1    | 2130.8 | 44.7 | 1  | R.ITLAEALLHPFFAGLTPEER.S                                                                          |
|                   | HsHeLa_Control-MG_Ti_20  | 4.3958 | 0.4224 | 2225.81 | 2226.58 | 6127.4 | 1    | 785.7  | 52.6 | 4  | R.ITLAEALLHPFFAGLTPEER.S                                                                          |
| gi 48255889 ref N |                          | 1      | 2      | 0.04    | 528     | 59425  | 4.4  | U      |      |    | protein kinase C substrate 80K-H isoform 1 [Homo sapiens]                                         |
| gi 48255891 ref N |                          | 1      | 2      | 0.04    | 525     | 59178  | 4.4  | U      |      |    | protein kinase C substrate 80K-H isoform 2 [Homo sapiens]                                         |
|                   | HsHeLa3_Ti_105.2714.271  | 3.6775 | 0.3745 | 2168.95 | 2169.36 | 7148   | 1    | 754.5  | 47.5 | 2  | K.LGGSPTSLGTWGSWIGPDHDK.F                                                                         |
| gi 4506567 ref NF |                          | 1      | 2      | 0.04    | 476     | 54844  | 6.6  | U      |      |    | RNA (guanine-7-) methyltransferase [Homo sapiens]                                                 |
| *                 | HsHeLa3_Ti_104.3271.327  | 3.0164 | 0.1349 | 2069.99 | 2070.35 | 5224.9 | 3    | 388.7  | 44.4 | 2  | R.LSPGGYFIGTTPNSFELIR.R                                                                           |
| gi 88942360 ref X |                          | 1      | 2      | 0.04    | 328     | 34023  | 10.8 | U      |      |    | PREDICTED: similar to 60S ribosomal protein L10 (QM protein) (Tumor suppressor QM) [Homo sapiens] |
| gi 88945316 ref X |                          | 1      | 2      | 0.04    | 328     | 34023  | 10.8 | U      |      |    | PREDICTED: similar to 60S ribosomal protein L10 (QM protein) (Tumor suppressor QM) [Homo sapiens] |
|                   | Hs293FLP_TREX_Ti_102.1   | 4.2826 | 0.3349 | 1561.21 | 1561.69 | 6583.9 | 1    | 1604.4 | 83.3 | 2  | K.FNADEFYVVAEK.Q                                                                                  |
| gi 4506145 ref NF |                          | 1      | 10     | 0.04    | 247     | 26558  | 6.5  | U      |      |    | protease, serine, 1 preproprotein [Homo sapiens]                                                  |
|                   | HsF-IP-293_Ti_103.1872.1 | 3.5732 | 0.1014 | 1175.32 | 1175.43 | 3489.8 | 2    | 534.4  | 83.3 | 10 | K.TLNDIMLIK.L                                                                                     |
| gi 31657094 ref N |                          | 3      | 4      | 0.039   | 1124    | 124199 | 8.1  | U      |      |    | anillin, actin binding protein (scraps homolog, Drosophila) [Homo sapiens]                        |
| *                 | HsHeLa3_Ti_104.3855.385  | 4.9569 | 0.4829 | 2363.93 | 2363.56 | 7029   | 1    | 1353.1 | 57.5 | 2  | R.LANLAATICSWEDDVNHSFAK.Q                                                                         |
| *                 | HsHeLa3_Ti_105.1487.148  | 2.6388 | 0.1755 | 1590.83 | 1590.77 | 3225.8 | 2    | 334.2  | 57.1 | 1  | K.STLSQTVPSKGELSR.E                                                                               |
| *                 | HsHeLa3_Ti_104.1876.187  | 1.8572 | 0.1112 | 829.66  | 829.071 | 5944.4 | 8    | 391.5  | 64.3 | 1  | R.LLLIATGK.R                                                                                      |
| gi 68131557 ref N |                          | 2      | 2      | 0.039   | 1053    | 112966 | 6.3  | U      |      |    | ankyrin repeat domain 28 [Homo sapiens]                                                           |
| *                 | HsFLAG-Control_Hela_Ti_1 | 4.4028 | 0.4314 | 1988.57 | 1989.29 | 8399.4 | 1    | 876.4  | 52.8 | 1  | R.NLINATNAALQTPLHVAAR.N                                                                           |
| *                 | HsFLAG-Control_Hela_Ti_1 | 2.9846 | 0.2631 | 2220.65 | 2219.42 | 8774.2 | 3    | 426.8  | 35.7 | 1  | K.GASVLAVDENGYPALACAPNK.D                                                                         |
| gi 14327896 ref N |                          | 1      | 4      | 0.039   | 433     | 48337  | 7.5  | U      |      |    | cyclin B1 [Homo sapiens]                                                                          |
| *                 | HsFLAG-Control_HeLa_NE   | 3.7217 | 0.3723 | 1811.57 | 1812.12 | 6509.5 | 1    | 591    | 53.1 | 4  | K.ISTLPQLNSALVQDLAK.A                                                                             |
| gi 6912618 ref NF |                          | 1      | 4      | 0.039   | 361     | 40877  | 6.6  | U      |      |    | glutaminy-peptide cyclotransferase precursor [Homo sapiens]                                       |

|                         |                          |        |        |         |         |        |   |        |      |   |                                                               |
|-------------------------|--------------------------|--------|--------|---------|---------|--------|---|--------|------|---|---------------------------------------------------------------|
| *<br>gi 5730104 ref NF  | Hs283FLP_Ti_103.2343.23  | 4.3738 | 0.2998 | 1493.68 | 1493.7  | 5516.8 | 1 | 890.2  | 69.2 | 4 | R.SFSNIISTLNPTAK.R                                            |
| *<br>gi 4505587 ref NF  | HsFLAG-Control_HeLa_S10  | 3.5616 | 0.3294 | 1578.45 | 1578.85 | 4337.7 | 1 | 816.8  | 75   | 2 | K.YEISSVPTFLFFK.N                                             |
| *<br>gi 19923217 ref NF | Hs293FLP_TREX_Ti_106.2   | 3.2964 | 0.1482 | 966.33  | 966.255 | 5556.8 | 2 | 1070.3 | 75   | 3 | R.VVVLGLLPR.G                                                 |
| *<br>*                  | HsHeLa3_Ti_103.1203.120  | 4.4426 | 0.4022 | 1633.89 | 1633.76 | 6292.4 | 1 | 1205.7 | 73.1 | 2 | K.TPVQYSQQQNSPQK.H                                            |
| *<br>*                  | HsFLAG-MOCK_300mM_T      | 3.1931 | 0.3957 | 2429.96 | 2430.63 | 6483.8 | 1 | 616.8  | 40.9 | 1 | R.NRTPAKVEDAADSATKPENLSSK.T                                   |
| *<br>*                  | HsGST-MOCK_Ti_106.235    | 4.4736 | 0.2203 | 2316.26 | 2315.59 | 6335.1 | 1 | 1025.7 | 39.5 | 1 | K.RRPQTPKEEAQALEDLTGFK.E                                      |
| *<br>*                  | HsFLAG-Control_HeLa_NE   | 2.8965 | 0.1653 | 1786.45 | 1785.95 | 6292.1 | 1 | 667.5  | 56.2 | 1 | K.ELFQTPGHTEEAAGK.T                                           |
| *<br>*                  | HsGST-MOCK_Ti_104.120    | 2.7273 | 0.2547 | 1394.69 | 1395.62 | 4828.5 | 7 | 399.5  | 58.3 | 1 | K.AMHTPKPAVGEEK.D<br>K.AQPLEDLASFQELSQTTPGHTEELANGAADSFTSAPK. |
| *<br>gi 13128864 ref NF | HsGST-MOCK_Ti_403.369    | 4.1765 | 0.3733 | 3759.4  | 3760.02 | 7184.7 | 1 | 932.9  | 26.4 | 1 | Q                                                             |
| *<br>*                  | HsFLAG-MOCK_300mM_T      | 4.3553 | 0.3636 | 2462.67 | 2463.76 | 5703.9 | 1 | 995    | 50   | 3 | R.SAQASVSCALEALEPFWEVLVR.S                                    |
| *<br>gi 55741709 ref NF | HsFLAG-MOCK_300mM_T      | 4.8978 | 0.3845 | 2604.65 | 2606.04 | 7455.1 | 1 | 1423.2 | 54.3 | 9 | R.LVLPIAYEFNPVLVSAGFDAAR.G                                    |
| *<br>*                  | HsFLAG-Control_HeLa_NE   | 3.7814 | 0.3914 | 2034.01 | 2034.06 | 4666.5 | 1 | 419.5  | 47.1 | 2 | R.EYSSELNAPSQESDHPK.R                                         |
| *<br>*                  | HsHeLa3_Ti_104.1155.115  | 2.1151 | 0.2416 | 1355.83 | 1356.48 | 5374.6 | 1 | 298.3  | 50   | 1 | K.LGASNSPGQPNSVK.R                                            |
| *<br>gi 29570791 ref NF | HsHeLa3_Ti_104.1152.115  | 3.0933 | 0.1931 | 1357.79 | 1356.48 | 4666.4 | 2 | 458.1  | 61.5 | 2 | K.LGASNSPGQPNSVK.R                                            |
| gi 4503095 ref NF       |                          | 1      | 0.038  | 391     | 45144   | 7.7    | U |        |      |   | casein kinase II alpha 1 subunit isoform a [Homo sapiens]     |
| gi 8922673 ref NF       | HsHeLa3_Ti_105.2070.207  | 4.1466 | 0.3744 | 1732.65 | 1732.93 | 5729.2 | 1 | 1069.8 | 67.9 | 2 | R.TPALVFEHVNTDFK.Q                                            |
| *<br>gi 39725634 ref NF | HsFLAG-Control_HeLa_NE   | 4.8583 | 0.3329 | 1608.33 | 1607.76 | 7155.6 | 1 | 1588.2 | 80.8 | 5 | K.DLAEDLYDGQVLQK.L                                            |
| gi 61102725 ref NF      |                          | 3      | 0.037  | 1019    | 116465  | 9.1    | U |        |      |   | la related protein isoform 1 [Homo sapiens]                   |
|                         | HsFLAG-Control_293_Ti_20 | 3.2409 | 0.4042 | 1713.31 | 1713.97 | 6327.8 | 1 | 951.3  | 66.7 | 1 | R.AVTPVPTKTEEVSNLK.T                                          |
|                         | HsFLAG-Control_293_Ti_20 | 3.0877 | 0.2784 | 1596.32 | 1594.83 | 8028   | 3 | 460.9  | 46.2 | 2 | R.LGIGQSQEMNTLFR.F                                            |
| gi 4506749 ref NF       | HsFLAG-Control_MG_293    | 3.1893 | 0.3483 | 1058.29 | 1058.19 | 6720.4 | 1 | 1170   | 92.9 | 2 | R.YGLECLFR.Y                                                  |
| *<br>*                  | HsHeLa_Control-MG_Ti_10  | 2.6598 | 0.172  | 1696.1  | 1695.02 | 6870.7 | 4 | 555.2  | 50   | 1 | R.VLSGEFQIVNPHLLK.D                                           |
| *<br>gi 76150623 ref NF | HsFLAG-Control_HeLa_S10  | 4.0655 | 0.3196 | 1571.77 | 1571.82 | 9533   | 1 | 1053.9 | 61.5 | 1 | R.TRPAANPIQFTLNK.E                                            |
| gi 76150625 ref NF      |                          | 3      | 0.037  | 808     | 88973   | 9.2    | U |        |      |   | nucleolar protein 1, 120kDa [Homo sapiens]                    |
|                         | Hs293FLP_TREX_Ti_105.1   | 3.6586 | 0.2934 | 1546.45 | 1546.72 | 6906.5 | 1 | 793.1  | 61.5 | 2 | R.LGVTNTIISHYDGR.Q                                            |
|                         | Hs293FLP_TREX_Ti_105.1   | 4.4856 | 0.2947 | 1547.15 | 1546.72 | 4617   | 3 | 697.2  | 46.2 | 1 | R.LGVTNTIISHYDGR.Q                                            |
| gi 42519916 ref NF      | Hs293FLP_TREX_Ti_102.1   | 4.1147 | 0.379  | 1627.28 | 1626.68 | 8821   | 1 | 1118.2 | 60   | 2 | K.TQASSSFQDSSQPAGK.A                                          |
| gi 4503739 ref NF       |                          | 1      | 0.037  | 673     | 71277   | 5.2    | U |        |      |   | forkhead box O3A [Homo sapiens]                               |
|                         | HsHeLa3_Ti_105.2870.287  | 3.655  | 0.5066 | 2456.38 | 2457.66 | 5312.5 | 2 | 405.8  | 35.4 | 2 | K.GSGLGSPTSSFNSTVFGPSSLNSLR.Q                                 |
| gi 23397696 ref NF      |                          | 1      | 0.037  | 537     | 59059   | 5.8    | U |        |      |   | copine I [Homo sapiens]                                       |
| gi 4503013 ref NF       |                          | 1      | 0.037  | 537     | 59059   | 5.8    | U |        |      |   | copine I [Homo sapiens]                                       |
| gi 23397708 ref NF      |                          | 1      | 0.037  | 537     | 59059   | 5.8    | U |        |      |   | copine I [Homo sapiens]                                       |
| gi 23397706 ref NF      |                          | 1      | 0.037  | 537     | 59059   | 5.8    | U |        |      |   | copine I [Homo sapiens]                                       |
| gi 23397704 ref NF      |                          | 1      | 0.037  | 537     | 59059   | 5.8    | U |        |      |   | copine I [Homo sapiens]                                       |
| gi 23397702 ref NF      |                          | 1      | 0.037  | 537     | 59059   | 5.8    | U |        |      |   | copine I [Homo sapiens]                                       |
| gi 23397700 ref NF      |                          | 1      | 0.037  | 537     | 59059   | 5.8    | U |        |      |   | copine I [Homo sapiens]                                       |
| gi 23397698 ref NF      |                          | 1      | 0.037  | 537     | 59059   | 5.8    | U |        |      |   | copine I [Homo sapiens]                                       |

|                    |                          |        |        |         |         |         |      |        |                                                                                         |    |                                       |
|--------------------|--------------------------|--------|--------|---------|---------|---------|------|--------|-----------------------------------------------------------------------------------------|----|---------------------------------------|
| gi 5032093 ref NF  | HsHeLa_Control-MG_Ti_20  | 4.4433 | 0.3523 | 2236.63 | 2236.57 | 7224.3  | 1    | 697.7  | 47.4                                                                                    | 4  | R.EALAQTVLAEVPTQLVSYFR.A              |
| *                  |                          | 1      | 2      | 0.037   | 541     | 56598   | 5.5  | U      | solute carrier family 1 (neutral amino acid transporter), member 5 [Homo sapiens]       |    |                                       |
| gi 71774083 ref NF | HsFLAG-Control_293_Ti_20 | 2.9041 | 0.1963 | 2160.63 | 2159.49 | 6383    | 2    | 446.4  | 42.1                                                                                    | 2  | K.SELPLDPLPVPTEEGNPLLK.H              |
| *                  |                          | 1      | 3      | 0.037   | 454     | 50565   | 5.4  | U      | myc proto-oncogene protein [Homo sapiens]                                               |    |                                       |
| gi 10835203 ref NF | HsGST-MOCK_Ti_305.298    | 4.035  | 0.3358 | 1840.7  | 1842.07 | 6768    | 1    | 1247.2 | 62.5                                                                                    | 3  | R.SGLCSPSYVAVTPFSLR.G                 |
| *                  |                          | 1      | 2      | 0.037   | 404     | 42803   | 6.1  | U      | advanced glycosylation end product-specific receptor isoform 1 precursor [Homo sapiens] |    |                                       |
| gi 89061564 ref NF | HsGST-MOCK_Ti_403.218    | 2.9314 | 0.1527 | 1528.49 | 1526.69 | 5025.9  | 1    | 892.9  | 75                                                                                      | 2  | K.VLSPQGGGPWDSVAR.V                   |
| *                  |                          | 1      | 4      | 0.037   | 377     | 41540   | 8.3  | U      | PREDICTED: similar to Ig gamma-2 chain C region [Homo sapiens]                          |    |                                       |
| gi 33350932 ref NF | HsHeLa3_Ti_104.2172.217  | 4.4668 | 0.3679 | 1678.47 | 1678.84 | 6616.4  | 1    | 1547.6 | 80.8                                                                                    | 4  | K.FNWWYVDGVEVHNAK.T                   |
| *                  |                          | 11     | 23     | 0.036   | 4646    | 532412  | 6.4  | U      | dynein, cytoplasmic, heavy polypeptide 1 [Homo sapiens]                                 |    |                                       |
| *                  | HsFLAG-Control_HeLa_S10  | 3.8227 | 0.4903 | 2348.72 | 2349.68 | 8010.9  | 1    | 975.9  | 50                                                                                      | 1  | K.LVPLLEDGGEAPAALEAALEEK.S            |
| *                  | HsFLAG-Control_HeLa_S10  | 4.1587 | 0.32   | 2349.33 | 2349.68 | 8720.5  | 1    | 1208.1 | 36.4                                                                                    | 1  | K.LVPLLEDGGEAPAALEAALEEK.S            |
| *                  | HsHeLa3_Ti_103.4032.403  | 5.6195 | 0.3853 | 2349.88 | 2349.68 | 8342.9  | 1    | 1750.9 | 39.8                                                                                    | 2  | K.LVPLLEDGGEAPAALEAALEEK.S            |
| *                  | HsHeLa3_Ti_103.4027.402  | 2.7563 | 0.4848 | 2349.9  | 2349.68 | 6514.8  | 1    | 439    | 38.6                                                                                    | 1  | K.LVPLLEDGGEAPAALEAALEEK.S            |
| *                  | HsHeLa3_Ti_103.4014.401  | 5.177  | 0.4585 | 2448.11 | 2446.86 | 7354    | 1    | 1567.2 | 56.8                                                                                    | 3  | R.ALPMDEVVGLNFSSATTPELLLK.T           |
| *                  | HsHeLa3_Ti_106.3146.314  | 3.5248 | 0.2261 | 2125.88 | 2124.53 | 4909.3  | 1    | 757.7  | 52.8                                                                                    | 1  | R.GIFEALRPLETLPVEGLIR.I               |
| *                  | HsFLAG-Control_HeLa_S10  | 3.7232 | 0.2171 | 2789.12 | 2789.2  | 5608.2  | 5    | 644.4  | 30.7                                                                                    | 1  | K.VFYEEELDVPVLFNFVLDHVLRI             |
| *                  | HsFLAG-Control_HeLa_S10  | 3.2294 | 0.2387 | 2266.6  | 2266.51 | 6515.9  | 1    | 485.8  | 42.1                                                                                    | 1  | R.ENFIPTIVNFSAEIEISDAIR.E             |
| *                  | HsHeLa3_Ti_103.3655.365  | 2.9754 | 0.2347 | 2329.72 | 2330.66 | 3826    | 2    | 328    | 42.1                                                                                    | 1  | R.YPLIIDPSGQATEFIMNEYK.D              |
| *                  | HsHeLa3_Ti_103.3915.391  | 5.3178 | 0.3968 | 2601.18 | 2599.95 | 6965.9  | 1    | 895.5  | 45.5                                                                                    | 10 | R.FGNPLLQDVESYDPLNPLVLR.E             |
| *                  | HsFLAG-Control_HeLa_S10  | 3.4602 | 0.2813 | 1800.51 | 1799.12 | 6637    | 2    | 511.3  | 46.9                                                                                    | 1  | K.LSLSNAISTALPLTQLR.W                 |
| gi 21396489 ref NF |                          | 1      | 2      | 0.036   | 959     | 106489  | 6.4  | U      | protease, serine, 15 [Homo sapiens]                                                     |    |                                       |
| *                  | HsHeLa_Control-MG_Ti_20  | 4.9091 | 0.2211 | 3874.6  | 3875.24 | 8889.6  | 1    | 1088.8 | 25.7                                                                                    | 2  | R.GYQGDPSALLELLDPEQANFLDHYLDVPVDLSK.V |
| gi 38372901 ref NF |                          | 1      | 2      | 0.036   | 785     | 80693   | 7.3  | U      | Sp1 transcription factor [Homo sapiens]                                                 |    |                                       |
| *                  | HsFLAG-Control_HeLa_NE   | 6.1241 | 0.4065 | 2815.76 | 2816.01 | 10401.5 | 1    | 1854.2 | 34.3                                                                                    | 2  | R.VSGLQGSDALNIQQNQTSGGSLQAGQQK.E      |
| gi 4505293 ref NF  |                          | 1      | 2      | 0.036   | 700     | 78764   | 6.9  | U      | MYB-related protein B [Homo sapiens]                                                    |    |                                       |
| *                  | HsHeLa3_Ti_103.2802.280  | 4.0557 | 0.2455 | 2395.15 | 2393.74 | 6887.8  | 1    | 851.4  | 47.9                                                                                    | 2  | R.GELIPISPSTEVGGSGIGTPPSVLK.R         |
| gi 11321603 ref NF |                          | 2      | 2      | 0.036   | 557     | 64406   | 7.4  | U      | TNF receptor-associated factor 5 [Homo sapiens]                                         |    |                                       |
| gi 77404348 ref NF |                          | 2      | 2      | 0.036   | 557     | 64406   | 7.4  | U      | TNF receptor-associated factor 5 [Homo sapiens]                                         |    |                                       |
| gi 22027627 ref NF |                          | 2      | 2      | 0.036   | 557     | 64406   | 7.4  | U      | TNF receptor-associated factor 5 [Homo sapiens]                                         |    |                                       |
|                    | HsGST-MOCK_Ti_104.110    | 3.3636 | 0.3046 | 1333.5  | 1333.45 | 8087.1  | 3    | 899.5  | 70                                                                                      | 1  | R.NLQQHEHSALR.E                       |
|                    | HsGST-MOCK_Ti_105.109    | 2.5848 | 0.2344 | 1116.9  | 1115.24 | 7453.8  | 2    | 708    | 75                                                                                      | 1  | K.HDTHINIHK.A                         |
| gi 4557809 ref NF  |                          | 1      | 2      | 0.036   | 439     | 48535   | 7    | U      | ornithine aminotransferase precursor [Homo sapiens]                                     |    |                                       |
| *                  | Hs283FLP_Ti_102.3218.32  | 3.7255 | 0.438  | 1953.57 | 1954.14 | 4720.7  | 1    | 797.5  | 66.7                                                                                    | 2  | R.AFYNNVLGEYEEYITK.L                  |
| gi 21361809 ref NF |                          | 1      | 3      | 0.036   | 390     | 42142   | 9.9  | U      | RNA binding motif protein, X-linked-like 1 [Homo sapiens]                               |    |                                       |
| gi 8850217 ref NF  |                          | 1      | 3      | 0.036   | 392     | 42784   | 10.3 | U      | testes-specific heterogenous nuclear ribonucleoprotein G-T [Homo sapiens]               |    |                                       |
| gi 56699409 ref NF |                          | 1      | 3      | 0.036   | 391     | 42332   | 10.1 | U      | RNA binding motif protein, X-linked [Homo sapiens]                                      |    |                                       |
|                    | HsFLAG-MOCK_300mM_T      | 4.7701 | 0.4184 | 1488.48 | 1487.65 | 6161.6  | 1    | 1359.2 | 76.9                                                                                    | 3  | R.GFAFVTFESPADAK.D                    |
| gi 4506017 ref NF  |                          | 1      | 2      | 0.036   | 309     | 35594   | 5.5  | U      | protein phosphatase 2, catalytic subunit, alpha isoform [Homo sapiens]                  |    |                                       |
| gi 57222565 ref NF |                          | 1      | 2      | 0.036   | 309     | 35575   | 5.4  | U      | protein phosphatase 2, catalytic subunit, beta isoform [Homo sapiens]                   |    |                                       |
| gi 4758952 ref NF  |                          | 1      | 2      | 0.036   | 309     | 35575   | 5.4  | U      | protein phosphatase 2, catalytic subunit, beta isoform [Homo sapiens]                   |    |                                       |
|                    | HsFLAG-Control_HeLa_NE   | 3.1503 | 0.3341 | 1341.56 | 1341.51 | 7159.9  | 1    | 815.8  | 65                                                                                      | 2  | K.YSFLQFDPAPR.R                       |
| gi 21361659 ref NF |                          | 2      | 6      | 0.035   | 1041    | 115963  | 4.8  | U      | importin 9 [Homo sapiens]                                                               |    |                                       |
| *                  | HsFLAG-Control_HeLa_S10  | 4.2509 | 0.2812 | 1942.75 | 1941.23 | 7967.6  | 1    | 757.5  | 50                                                                                      | 5  | K.EALVDTLTGILSPVQEV.R.A               |
| *                  | HsFLAG-Control_HeLa_S10  | 3.9977 | 0.3359 | 2253.72 | 2254.19 | 4272.6  | 1    | 629.9  | 64.7                                                                                    | 1  | K.YEEDYYEDEEDDPALK.D                  |
| gi 24497620 ref NF |                          | 1      | 2      | 0.035   | 627     | 70730   | 8.6  | U      | signal recognition particle 68kDa [Homo sapiens]                                        |    |                                       |
| *                  | HsHeLa3_Ti_105.0314.031  | 2.8868 | 0.1631 | 2569.97 | 2570    | 6180.9  | 4    | 469.6  | 38.1                                                                                    | 2  | R.LYDIILQNLVELLQLPGLLEEDK.A           |
| gi 19923399 ref NF |                          | 1      | 2      | 0.035   | 482     | 54121   | 5.6  | U      | Ras-GTPase activating protein SH3 domain-binding protein 2 isoform a [Homo sapiens]     |    |                                       |

|                   |                          |        |        |         |         |         |   |                                                                                     |
|-------------------|--------------------------|--------|--------|---------|---------|---------|---|-------------------------------------------------------------------------------------|
| gi 45359849 ref N | 1                        | 2      | 0.035  | 482     | 54121   | 5.6     | U | Ras-GTPase activating protein SH3 domain-binding protein 2 isoform a [Homo sapiens] |
| gi 45359846 ref N | 1                        | 2      | 0.038  | 449     | 50817   | 5.4     | U | Ras-GTPase activating protein SH3 domain-binding protein 2 isoform b [Homo sapiens] |
|                   | HsFLAG-Control_HeLa_NE   | 3.9927 | 0.4429 | 1967.93 | 1967.19 | 8005.9  | 1 | 954.1 59.4 2 K.LPNFGFVVFDSEPVQR.I                                                   |
| gi 4507835 ref NF | 1                        | 2      | 0.035  | 480     | 52222   | 7.2     | U | uridine monophosphate synthase [Homo sapiens]                                       |
| *                 | HsFLAG-Control_HeLa_S10  | 4.8871 | 0.4739 | 1763.75 | 1764.08 | 5520.5  | 1 | 1365.8 71.9 2 R.AALGPLVTGLYDVQAFK.F                                                 |
| gi 48526509 ref N | 1                        | 2      | 0.035  | 456     | 50465   | 9.4     | U | translocase of inner mitochondrial membrane 50 homolog [Homo sapiens]               |
| *                 | HsFLAG-Control_293_Ti_20 | 4.1501 | 0.3322 | 1913.35 | 1913.14 | 7467.8  | 1 | 1046 63.3 2 K.IPDEFDNDPILVQQLR.R                                                    |
| gi 61743954 ref N | 12                       | 53     | 0.034  | 5890    | 629114  | 6.1     | U | AHNAK nucleoprotein isoform 1 [Homo sapiens]                                        |
| *                 | HsFLAG-Control_HeLa_NE   | 4.1252 | 0.4048 | 1638.18 | 1638.78 | 6493.9  | 1 | 761.7 52.9 1 R.AGAISASGPELQAGHSK.L                                                  |
| *                 | HsFLAG-Control_HeLa_NE   | 2.9202 | 0.2033 | 1599.37 | 1599.78 | 3764.3  | 2 | 401.6 53.1 1 R.GGVQVPAVDISSSLGGR.A                                                  |
| *                 | HsFLAG-MOCK_300mM_T      | 3.2106 | 0.1933 | 1365.53 | 1364.5  | 6745.6  | 1 | 859.7 66.7 2 K.FGVSTGREGQTPK.A                                                      |
|                   | HsFLAG-Control_HeLa_NE   | 3.8693 | 0.3255 | 1268.06 | 1268.41 | 6260.3  | 2 | 1082.3 77.3 12 K.AEGPEVDVNLPK.A                                                     |
| *                 | HsFLAG-Control_HeLa_NE   | 3.6878 | 0.3269 | 1701.06 | 1699.85 | 3881.4  | 1 | 546.8 60 3 K.IDVTAPDVSIEEPEGK.L                                                     |
| *                 | HsFLAG-Control_HeLa_NE   | 3.77   | 0.2296 | 1655.71 | 1655.8  | 3871.6  | 1 | 739.9 66.7 1 K.VDIEAPDVSLEGPEGK.L                                                   |
|                   | HsFLAG-Control_HeLa_NE   | 3.7626 | 0.3116 | 1671.08 | 1669.83 | 3357.6  | 1 | 709.4 70 9 K.VDVEVPDVSLEGPEGK.L                                                     |
|                   | HsHeLa_Control-MG_Ti_20  | 3.1529 | 0.3187 | 2625.77 | 2626.84 | 7108.5  | 1 | 460.6 35.4 2 K.LEGDLTGPSVGVEVPDVELECPDAK.L                                          |
|                   | HsFLAG-Control_HeLa_NE   | 2.7765 | 0.1796 | 1159.34 | 1157.35 | 4239.9  | 1 | 521.5 75 8 K.VKGDVDVSLPK.L                                                          |
|                   | HsFLAG-Control_HeLa_NE   | 3.5873 | 0.3784 | 1682.41 | 1682.83 | 3362.1  | 1 | 561.9 66.7 12 K.VDVPDVPDNIIEGPDPAK.L                                                |
| *                 | HsHeLa3_Ti_104.3117.311  | 4.8118 | 0.3117 | 2182.97 | 2184.5  | 4493.6  | 1 | 828.8 60 1 K.TPSFGISAPQVSIPDVNVNLK.G                                                |
| *                 | HsHeLa3_Ti_102.2107.210  | 2.7722 | 0.203  | 1734.85 | 1733.83 | 5301.8  | 1 | 514.8 50 1 K.ASLGSLEGEAEAEASSPK.G                                                   |
| gi 53759103 ref N | 2                        | 2      | 0.034  | 1037    | 119938  | 5.2     | U | importin 8 [Homo sapiens]                                                           |
| *                 | HsFLAG-Control_MG_293_   | 3.1005 | 0.2828 | 1333.18 | 1333.61 | 8711.1  | 1 | 1185.4 77.3 1 K.TYAVGIQQVLLK.I                                                      |
| *                 | Hs293FLP-MG_Ti_202.456   | 3.7017 | 0.3651 | 2538.42 | 2538.81 | 6338.3  | 1 | 711 45.5 1 K.FDIFEDYASPTTAAQTLTYAAK.K                                               |
| gi 42560244 ref N | 2                        | 4      | 0.034  | 754     | 88617   | 10.3    | U | peptidyl-prolyl isomerase G (cyclophilin G) [Homo sapiens]                          |
| *                 | HsHeLa_Control-MG_Ti_20  | 3.5267 | 0.3553 | 1408.76 | 1408.47 | 8809.8  | 1 | 1421.1 72.7 2 K.SKGQENDHVHEK.N                                                      |
| *                 | Hs293FLP-MG_Ti_203.120   | 3.9368 | 0.2937 | 1592.49 | 1592.62 | 7762.8  | 1 | 1465.4 73.1 2 K.KFDHESSPGTDEDK.S                                                    |
| gi 13435375 ref N | 1                        | 2      | 0.034  | 563     | 61327   | 4.8     | U | glucocorticoid modulatory element binding protein 1 isoform 2 [Homo sapiens]        |
| gi 13435377 ref N | 1                        | 2      | 0.033  | 573     | 62591   | 4.8     | U | glucocorticoid modulatory element binding protein 1 isoform 1 [Homo sapiens]        |
|                   | HsFLAG-Control_HeLa_NE   | 4.8468 | 0.4518 | 2312.77 | 2313.48 | 9210.3  | 1 | 1186.2 52.8 2 R.NQVEQGEEQFLYTLTLTLER.Q                                              |
| gi 4502111 ref NF | 1                        | 2      | 0.034  | 466     | 50316   | 6.6     | U | annexin VII isoform 1 [Homo sapiens]                                                |
| gi 4809279 ref NF | 1                        | 2      | 0.033  | 488     | 52739   | 5.7     | U | annexin VII isoform 2 [Homo sapiens]                                                |
|                   | HsFLAG-Control_HeLa_S10  | 4.8302 | 0.3691 | 1691.57 | 1691.84 | 7461.1  | 1 | 1381.7 63.3 2 K.GFGTDEQAIVDVVANR.S                                                  |
| gi 4885399 ref NF | 2                        | 2      | 0.033  | 1217    | 141541  | 7.2     | U | chondroitin sulfate proteoglycan 6 (bamacan) [Homo sapiens]                         |
| *                 | HsHeLa3_Ti_103.3598.359  | 2.7529 | 0.1778 | 2478.29 | 2475.75 | 7127.1  | 1 | 436.2 42.1 1 R.INNEIDQLMNQMQUIETQQR.K                                               |
| *                 | HsFLAG-Control_HeLa_NE   | 2.6541 | 0.243  | 2065.15 | 2065.24 | 9065.9  | 6 | 341.6 34.2 1 R.ETEGGTVLTATTSELEAINK.R                                               |
| gi 4507877 ref NF | 2                        | 2      | 0.033  | 1066    | 116722  | 6.1     | U | vinculin isoform VCL [Homo sapiens]                                                 |
| gi 7669550 ref NF | 2                        | 2      | 0.031  | 1134    | 123799  | 5.7     | U | vinculin isoform meta-VCL [Homo sapiens]                                            |
|                   | HsFLAG-Control_HeLa_S10  | 3.9572 | 0.3489 | 2077.55 | 2077.43 | 10442.9 | 1 | 1665.5 38.8 1 K.AIPDLTAPVAAVQAAVSNLVR.V                                             |
|                   | HsFLAG-Control_HeLa_S10  | 2.5982 | 0.0839 | 1487.33 | 1485.68 | 8169.3  | 1 | 758.1 61.5 1 R.VDQLTAQLADLAAR.G                                                     |
| gi 7706485 ref NF | 2                        | 2      | 0.033  | 704     | 80011   | 8       | U | TNF receptor-associated protein 1 [Homo sapiens]                                    |
| *                 | HsFLAG-Control_293_Ti_20 | 2.8373 | 0.3129 | 1187.66 | 1185.33 | 7370.8  | 1 | 1265.4 88.9 1 R.YVAQAHDKPR.Y                                                        |
| *                 | Hs293FLP_TREX_Ti_104.2   | 3.6996 | 0.2951 | 1493.59 | 1493.75 | 4121.2  | 2 | 528.3 62.5 1 R.AQLLQPTLEINPR.H                                                      |
| gi 24307879 ref N | 1                        | 5      | 0.033  | 638     | 71457   | 5.2     | U | dynein, cytoplasmic, intermediate polypeptide 2 [Homo sapiens]                      |
| *                 | HsFLAG-Control_HeLa_S10  | 4.6135 | 0.4851 | 1951.49 | 1951.96 | 8865    | 1 | 1434 60 5 K.SVSTPSEAGSQDSGDGAVGSR.T                                                 |
| gi 40538809 ref N | 1                        | 2      | 0.033  | 510     | 55216   | 6.1     | U | hypothetical protein LOC55571 [Homo sapiens]                                        |
| *                 | HsFLAG-Control_HeLa_NE   | 4.5896 | 0.395  | 1855.7  | 1856.08 | 6299.1  | 1 | 1163.5 68.8 2 K.SPLSSPQQTQLLGELEK.D                                                 |
| gi 7661892 ref NF | 1                        | 3      | 0.033  | 482     | 53028   | 7       | U | REST corepressor 1 [Homo sapiens]                                                   |
| *                 | HsFLAG-Control_HeLa_NE   | 4.3656 | 0.4021 | 1731.69 | 1731.95 | 5560.7  | 1 | 931.8 66.7 3 R.VGPQYQAVVPDFPAK.L                                                    |
| gi 22749139 ref N | 1                        | 2      | 0.033  | 427     | 48359   | 9.6     | U | serum response factor binding protein 1 [Homo sapiens]                              |

|                                   |                                |               |               |                |                |               |            |               |           |          |                                                                      |
|-----------------------------------|--------------------------------|---------------|---------------|----------------|----------------|---------------|------------|---------------|-----------|----------|----------------------------------------------------------------------|
| *                                 | HsHeLa3_Ti_105.1254.125        | 3.0223        | 0.3206        | 1429.91        | 1429.61        | 8633.5        | 1          | 1111          | 65.4      | 2        | K.AVTIANSPSPKPEK.D                                                   |
| gi 4504511 ref NF                 |                                | 1             | 4             | 0.033          | 397            | 44868         | 7.1        | U             |           |          | DnaJ (Hsp40) homolog, subfamily A, member 1 [Homo sapiens]           |
| *                                 | HsFLAG-Control_HeLa_S10        | 3.6068        | 0.2836        | 1393.95        | 1393.67        | 7198.1        | 2          | 954.6         | 70.8      | 4        | R.TIVITSHPGQIVK.H                                                    |
| gi 12746590 ref NF                |                                | 2             | 2             | 0.032          | 985            | 106208        | 8          | U             |           |          | C-terminal binding protein 2 isoform 2 [Homo sapiens]                |
| gi 4557499 ref NF                 |                                | 2             | 2             | 0.072          | 445            | 48945         | 6.9        | U             |           |          | C-terminal binding protein 2 isoform 1 [Homo sapiens]                |
|                                   | HsFLAG-MOCK_300mM_T            | 3.0572        | 0.0847        | 1057.75        | 1057.24        | 7465.3        | 1          | 1550.7        | 88.9      | 1        | K.ALAQALKEGR.I                                                       |
|                                   | HsFLAG-MOCK_300mM_T            | 2.7962        | 0.2491        | 2372.08        | 2370.67        | 7202.4        | 1          | 576.8         | 42.9      | 1        | R.IRGAALDVHESEPFPSFAQGPLK.D                                          |
| <b>SHUFFLED_gi 4557499 ref NF</b> |                                | <b>1</b>      | <b>3</b>      | <b>0.032</b>   | <b>595</b>     | <b>69690</b>  | <b>6.5</b> | <b>U</b>      |           |          | <b>FALSE POSITIVE</b>                                                |
| *                                 | <b>HsHeLa_Control-MG_Ti_20</b> | <b>3.7332</b> | <b>0.1576</b> | <b>2374.72</b> | <b>2375.73</b> | <b>8702.9</b> | <b>1</b>   | <b>1015.1</b> | <b>50</b> | <b>3</b> | <b>K.EQYGRVQNLFEFEKAFLKK.T</b>                                       |
| gi 7706254 ref NF                 |                                | 1             | 3             | 0.032          | 529            | 59578         | 8.9        | U             |           |          | nucleolar protein NOP5/NOP58 [Homo sapiens]                          |
| *                                 | HsGST-MOCK_Ti_302.5230         | 5.3802        | 0.3903        | 1891.56        | 1890.2         | 8515.2        | 1          | 1732.9        | 65.6      | 3        | K.VDTMIVQAISSLLDDLDK.E                                               |
| gi 24496789 ref NF                |                                | 2             | 4             | 0.031          | 1176           | 134411        | 7.2        | U             |           |          | leucyl-tRNA synthetase [Homo sapiens]                                |
| *                                 | HsFLAG-Control_HeLa_NE         | 2.863         | 0.2261        | 1924.78        | 1925.11        | 8825.5        | 4          | 421.4         | 43.3      | 2        | R.SFITTDVNPYYDSFVR.W                                                 |
| *                                 | HsFLAG-Control_HeLa_NE         | 3.0883        | 0.1357        | 1959.09        | 1958.13        | 4082.2        | 3          | 224.6         | 39.5      | 2        | K.GTGVVTSVPSDSDPDIAALR.D                                             |
| gi 32528306 ref NF                |                                | 2             | 4             | 0.031          | 1147           | 128183        | 9.4        | U             |           |          | replication factor C large subunit [Homo sapiens]                    |
| *                                 | HsFLAG-Control_HeLa_NE         | 4.0991        | 0.5082        | 1843.92        | 1842.06        | 6363          | 1          | 753.9         | 59.4      | 2        | K.LTPTSVLDYFGTGSVQR.S                                                |
| *                                 | HsFLAG-Control_HeLa_NE         | 2.8116        | 0.1391        | 1936.09        | 1935.01        | 9446.6        | 6          | 547           | 41.2      | 2        | K.ELSQNTDESGLNDEAIAK.Q                                               |
| gi 51492636 ref NF                |                                | 2             | 2             | 0.031          | 1085           | 124025        | 8.6        | U             |           |          | PREDICTED: U2-associated SR140 protein [Homo sapiens]                |
| gi 88971174 ref NF                |                                | 2             | 2             | 0.031          | 1085           | 124025        | 8.6        | U             |           |          | PREDICTED: similar to U2-associated SR140 protein [Homo sapiens]     |
|                                   | HsFLAG-MOCK_300mM_T            | 4.5861        | 0.4144        | 1714.58        | 1713.8         | 8176.5        | 1          | 1004.5        | 56.7      | 1        | R.GGVVNAAKEEHETDEK.R                                                 |
|                                   | HsFLAG-Control_HeLa_NE         | 3.1208        | 0.3495        | 1905.33        | 1905.96        | 3590.4        | 1          | 332.5         | 50        | 1        | K.SLDDDLGVLPLDATEDSK.K                                               |
| gi 21614520 ref NF                |                                | 2             | 2             | 0.031          | 515            | 59258         | 6.7        | U             |           |          | glucose-6-phosphate dehydrogenase [Homo sapiens]                     |
| *                                 | HsHeLa_Control-MG_Ti_20        | 3.6974        | 0.227         | 1944.52        | 1944.12        | 6498.4        | 1          | 912.7         | 43.3      | 1        | R.LQFHDVAGDIFHQCK.R                                                  |
| *                                 | HsHeLa_Control-MG_Ti_20        | 5.1362        | 0.4453        | 1946.11        | 1944.12        | 9374.3        | 1          | 1816.4        | 70        | 1        | R.LQFHDVAGDIFHQCK.R                                                  |
| gi 6005743 ref NF                 |                                | 1             | 4             | 0.031          | 479            | 53927         | 6.3        | U             |           |          | DEAD (Asp-Glu-Ala-As) box polypeptide 19 isoform 1 [Homo sapiens]    |
| gi 8922886 ref NF                 |                                | 1             | 4             | 0.031          | 478            | 53975         | 6.6        | U             |           |          | DDX19-like protein [Homo sapiens]                                    |
| gi 62632746 ref NF                |                                | 1             | 4             | 0.031          | 479            | 54137         | 6.3        | U             |           |          | DDX19-DDX19L protein [Homo sapiens]                                  |
| gi 62241024 ref NF                |                                | 1             | 4             | 0.033          | 448            | 50490         | 6.1        | U             |           |          | DEAD (Asp-Glu-Ala-As) box polypeptide 19 isoform 2 [Homo sapiens]    |
| gi 5453593 ref NF                 | HsFLAG-Control_HeLa_NE         | 4.2978        | 0.1473        | 1731.2         | 1729.89        | 7963.7        | 1          | 1641.9        | 71.4      | 4        | R.SNLVDNTNQVEVLQR.D                                                  |
| *                                 | HsFLAG-Control_HeLa_S10        | 4.1304        | 0.031         | 477            | 52824          | 6.4           | U          |               |           |          | adenylyl cyclase-associated protein 2 [Homo sapiens]                 |
| gi 23111032 ref NF                |                                | 1             | 2             | 0.031          | 457            | 51813         | 5.6        | U             |           |          | sorting nexin 1 isoform b [Homo sapiens]                             |
| gi 23111036 ref NF                |                                | 1             | 2             | 0.03           | 474            | 53304         | 5          | U             |           |          | sorting nexin 1 isoform c [Homo sapiens]                             |
| gi 23111034 ref NF                |                                | 1             | 2             | 0.027          | 522            | 59070         | 5.1        | U             |           |          | sorting nexin 1 isoform a [Homo sapiens]                             |
|                                   | HsFLAG-Control_HeLa_S10        | 3.3812        | 0.3231        | 1316.6         | 1316.54        | 7062.1        | 1          | 1483.1        | 76.9      | 2        | R.AVGTQTLGAGLLK.M                                                    |
| gi 4503729 ref NF                 |                                | 1             | 2             | 0.031          | 459            | 51805         | 5.4        | U             |           |          | FK506-binding protein 4 [Homo sapiens]                               |
| *                                 | Hs293FLP_TREX_Ti_101.0         | 3.9803        | 0.3717        | 1409.23        | 1409.41        | 9635.7        | 1          | 1450.8        | 69.2      | 2        | K.SNTAGSQSQVETEA.-                                                   |
| gi 34482047 ref NF                |                                | 2             | 3             | 0.03           | 1082           | 119059        | 5.6        | U             |           |          | adaptor-related protein complex 3, beta 2 subunit [Homo sapiens]     |
| *                                 | HsFLAG-Control_293_Ti_20       | 2.5036        | 0.2193        | 2260.68        | 2258.41        | 8848.9        | 9          | 344.1         | 36.8      | 1        | K.ATGYQELPDWPPEAPDPSVR.N                                             |
| *                                 | HsFLAG-Control_MG_293_         | 3.6447        | 0.3769        | 1287.45        | 1286.43        | 8713.7        | 1          | 1346.3        | 75        | 2        | R.PAGAAQLTVNSEK.M                                                    |
| gi 62244004 ref NF                |                                | 2             | 2             | 0.03           | 1016           | 115409        | 8.1        | U             |           |          | modulator of estrogen induced transcription isoform b [Homo sapiens] |
| gi 63176611 ref NF                |                                | 2             | 2             | 0.029          | 1034           | 117149        | 7.9        | U             |           |          | modulator of estrogen induced transcription isoform a [Homo sapiens] |
|                                   | HsGST-MOCK_Ti_406.2440         | 3.071         | 0.2376        | 1326.49        | 1326.55        | 9826.1        | 1          | 1394.7        | 72.7      | 1        | K.SPGHMVILDQTK.G                                                     |
|                                   | HsGST-MOCK_Ti_406.2310         | 2.9943        | 0.2804        | 1812.32        | 1813           | 8321.9        | 2          | 663.2         | 47.1      | 1        | R.AGAGMITQHSSNASPINR.I                                               |
| gi 4557032 ref NF                 |                                | 1             | 2             | 0.03           | 334            | 36639         | 6.1        | U             |           |          | lactate dehydrogenase B [Homo sapiens]                               |
| *                                 | Hs293FLP_TREX_Ti_102.1         | 3.3728        | 0.1945        | 1177.5         | 1177.3         | 4569.1        | 2          | 810.8         | 77.8      | 2        | K.SADTLWDIQQ.D                                                       |
| gi 6382079 ref NF                 |                                | 5             | 12            | 0.029          | 3224           | 358173        | 6.2        | U             |           |          | RAN binding protein 2 [Homo sapiens]                                 |
| *                                 | HsHeLa3_Ti_104.1407.1400       | 3.0423        | 0.2962        | 1488.31        | 1487.67        | 4943.6        | 3          | 474.2         | 57.1      | 1        | K.APGTNVAMASNQAVR.I                                                  |
|                                   | HsFLAG-Control_HeLa_NE         | 3.202         | 0.4397        | 1825.13        | 1824.9         | 6354.4        | 1          | 517.7         | 47.1      | 8        | K.QNQTTSAVSTPASSETSK.A                                               |

|                   |                          |        |        |         |         |         |   |                                                                                            |      |   |                                 |
|-------------------|--------------------------|--------|--------|---------|---------|---------|---|--------------------------------------------------------------------------------------------|------|---|---------------------------------|
|                   | HsFLAG-Control_HeLa_NE   | 3.3797 | 0.3548 | 2412.93 | 2411.41 | 6694    | 1 | 645.9                                                                                      | 45.2 | 1 | K.LNQSGTSVGTDEESDVTQEEER.D      |
| *                 | HsFLAG-Control_HeLa_NE   | 2.9784 | 0.3318 | 2095.28 | 2096.3  | 4657.9  | 1 | 363.7                                                                                      | 47.1 | 1 | K.NLFASFPTEESSINYTFK.T          |
| *                 | HsFLAG-Control_HeLa_NE   | 3.624  | 0.3457 | 2516.77 | 2517.53 | 10822.5 | 1 | 942.6                                                                                      | 45   | 1 | K.NRPDYVSEEEEDDEDFFETAVK.K      |
| gi 46430642 ref N |                          | 2      | 0.029  | 1028    | 117949  | 9.4     | U | myosin IC [Homo sapiens]                                                                   |      |   |                                 |
|                   | HsHeLa_Control-MG_Ti_10  | 2.615  | 0.2943 | 1602.47 | 1601.84 | 3648.7  | 4 | 280.6                                                                                      | 50   | 1 | R.LLQSNPVLEAFGNAK.T             |
| *                 | HsHeLa_Control-MG_Ti_10  | 2.5777 | 0.1943 | 1554.7  | 1554.83 | 3260.5  | 1 | 346.9                                                                                      | 60.7 | 1 | K.GAPVGGHILSYLLEK.S             |
| gi 10863889 ref N |                          | 2      | 0.029  | 800     | 90255   | 6.1     | U | squamous cell carcinoma antigen recognized by T cells 1 [Homo sapiens]                     |      |   |                                 |
| *                 | HsFLAG-MOCK_300mM_T      | 3.828  | 0.2576 | 1426    | 1424.69 | 9218.6  | 1 | 1078.8                                                                                     | 65   | 1 | R.LRQLQLQLR.D                   |
| *                 | HsHeLa3_Ti_105.2394.239  | 4.203  | 0.2261 | 1273.73 | 1272.5  | 7661.4  | 1 | 1259.6                                                                                     | 72.7 | 2 | R.GLAAALLCQNK.G                 |
| gi 5031579 ref NF |                          | 1      | 0.029  | 692     | 76108   | 5.1     | U | A-kinase anchor protein 8 [Homo sapiens]                                                   |      |   |                                 |
| *                 | HsFLAG-Control_HeLa_NE   | 4.9624 | 0.5181 | 1970.24 | 1971.09 | 5755.3  | 1 | 1283.1                                                                                     | 68.4 | 3 | R.VAPAPAAADAEVEQTDAESK.D        |
| gi 32526896 ref N |                          | 1      | 0.029  | 659     | 73994   | 6.7     | U | armadillo repeat containing 8 isoform 2 [Homo sapiens]                                     |      |   |                                 |
| gi 47458045 ref N |                          | 1      | 0.049  | 385     | 42984   | 7.2     | U | armadillo repeat containing 8 isoform 1 [Homo sapiens]                                     |      |   |                                 |
| gi 47458043 ref N |                          | 1      | 0.049  | 385     | 42984   | 7.2     | U | armadillo repeat containing 8 isoform 3 [Homo sapiens]                                     |      |   |                                 |
|                   | HsHeLa_Control-MG_Ti_20  | 4.2365 | 0.3212 | 2146.47 | 2146.4  | 7901.3  | 1 | 904.2                                                                                      | 50   | 2 | R.VEGAETLAYLIEPDVELQR.I         |
| gi 4507521 ref NF |                          | 1      | 0.029  | 623     | 67878   | 7.7     | U | transketolase [Homo sapiens]                                                               |      |   |                                 |
| *                 | Hs293FLP_TREX_Ti_102.1   | 3.3988 | 0.4378 | 1885.44 | 1886.07 | 5324.8  | 1 | 677.5                                                                                      | 58.8 | 2 | R.SVPTSTVFYPSDGVATEK.A          |
| gi 38372909 ref N |                          | 2      | 0.028  | 1761    | 191610  | 7.2     | U | jumonji domain containing 1B [Homo sapiens]                                                |      |   |                                 |
| *                 | HsHeLa3_Ti_105.2940.294  | 4.6438 | 0.4816 | 2537.22 | 2536.8  | 5190.4  | 1 | 718.4                                                                                      | 48   | 3 | R.NSILASSFGAPLPSSSQPLTFGSGR.S   |
| *                 | HsHeLa3_Ti_106.2911.291  | 3.0143 | 0.3427 | 2457.21 | 2457.83 | 3426.3  | 1 | 215.7                                                                                      | 34.8 | 1 | K.LPQTPLDTGIPFPVFSTSSAGVK.S     |
| gi 62241042 ref N |                          | 3      | 0.028  | 1512    | 170590  | 7.3     | U | glutamyl-prolyl tRNA synthetase [Homo sapiens]                                             |      |   |                                 |
| *                 | HsFLAG-MOCK_300mM_T      | 2.6888 | 0.4012 | 1652.03 | 1651.86 | 8076.3  | 1 | 1046.9                                                                                     | 64.3 | 1 | K.TKVEATKNETSAPFK.E             |
| *                 | HsGST-MOCK_Ti_105.131    | 2.9249 | 0.3085 | 1682.58 | 1682.84 | 10413.1 | 1 | 828.4                                                                                      | 46.7 | 1 | R.AIQGGTSHHLGQNFQSK.M           |
| *                 | HsFLAG-Control_293_Ti_20 | 2.7768 | 0.176  | 1204.24 | 1205.31 | 6877.6  | 1 | 1157.6                                                                                     | 85   | 2 | K.LTVAENEAETK.L                 |
| gi 40789229 ref N |                          | 2      | 0.028  | 1147    | 125869  | 9.6     | U | splicing factor, arginine/serine-rich 15 [Homo sapiens]                                    |      |   |                                 |
|                   | HsFLAG-Control_HeLa_NE   | 3.7821 | 0.31   | 1331.71 | 1331.6  | 7308    | 1 | 1695.9                                                                                     | 86.4 | 3 | K.VPGLYVIDSIVR.Q                |
| *                 | HsFLAG-Control_HeLa_NE   | 4.4047 | 0.4053 | 2114.12 | 2114.31 | 3459.5  | 1 | 741.6                                                                                      | 63.2 | 4 | K.TVEPPISQVGNVDTASELEK.G        |
| gi 5453998 ref NF |                          | 2      | 0.028  | 1038    | 119516  | 4.8     | U | importin 7 [Homo sapiens]                                                                  |      |   |                                 |
| *                 | HsFLAG-Control_HeLa_S10  | 4.2931 | 0.3006 | 1272.92 | 1273.56 | 5371.2  | 1 | 1330.9                                                                                     | 86.4 | 1 | K.AFAVGVQQVLLK.V                |
| *                 | HsFLAG-Control_HeLa_S10  | 4.6454 | 0.4895 | 2056.03 | 2056.25 | 9392.5  | 1 | 1490.4                                                                                     | 62.5 | 3 | R.NPVWYQALTHGLNEEQR.K           |
| gi 20127519 ref N |                          | 1      | 0.028  | 747     | 85653   | 9.2     | U | TPX2, microtubule-associated protein homolog [Homo sapiens]                                |      |   |                                 |
| *                 | HsGST-MOCK_Ti_403.339    | 4.2251 | 0.4362 | 2191.44 | 2191.44 | 9316.2  | 1 | 716.5                                                                                      | 42.5 | 3 | K.SVAEGLSGSLVQEPFLATEK.R        |
| gi 29789006 ref N |                          | 1      | 0.028  | 680     | 77861   | 6.7     | U | pleckstrin homology domain containing, family C (with FERM domain) member 1 [Homo sapiens] |      |   |                                 |
| *                 | HsFLAG-Control_HeLa_NE   | 3.5889 | 0.3483 | 2050.87 | 2051.34 | 4710.1  | 8 | 341.6                                                                                      | 41.7 | 3 | K.TSTILGDITSIPELADYIK.V         |
| gi 20270212 ref N |                          | 3      | 0.027  | 1729    | 181804  | 4.9     | U | tankyrase 1-binding protein of 182 kDa [Homo sapiens]                                      |      |   |                                 |
| *                 | HsHeLa3_Ti_102.2223.222  | 2.7465 | 0.2523 | 1981.82 | 1982.08 | 10350.6 | 3 | 706.8                                                                                      | 44.1 | 1 | K.DTQSPSTCSEGLLGWSQK.D          |
| *                 | HsHeLa3_Ti_105.2767.276  | 3.0572 | 0.0866 | 1344.76 | 1343.61 | 3013    | 3 | 558.4                                                                                      | 75   | 1 | K.VNLFPGSPSALK.A                |
| *                 | HsHeLa3_Ti_103.2408.241  | 2.6262 | 0.0906 | 1649.85 | 1648.77 | 4319.5  | 1 | 405.8                                                                                      | 50   | 1 | K.SSGSEGSSPNWLQALK.L            |
| gi 39995084 ref N |                          | 1      | 0.027  | 1042    | 118013  | 5.8     | U | hypothetical protein LOC65123 [Homo sapiens]                                               |      |   |                                 |
| *                 | HsFLAG-Control_HeLa_NE   | 5.3724 | 0.3781 | 1953.49 | 1954.03 | 6505.7  | 1 | 2024.2                                                                                     | 55.6 | 3 | K.GAAAAAASGAAGGGGGGAGAGAPGGGR.L |
| gi 38570097 ref N |                          | 1      | 0.027  | 776     | 86436   | 5.9     | U | hypothetical protein LOC54870 [Homo sapiens]                                               |      |   |                                 |
| gi 38570099 ref N |                          | 1      | 0.027  | 776     | 86436   | 5.9     | U | hypothetical protein LOC54870 [Homo sapiens]                                               |      |   |                                 |
|                   | HsHeLa3_Ti_105.3304.330  | 3.3088 | 0.2555 | 2490.69 | 2489.86 | 5401.3  | 1 | 378.9                                                                                      | 42.5 | 2 | R.VTPLGYVLP SHVTEMLWECK.Q       |
| gi 20357552 ref N |                          | 1      | 0.027  | 550     | 61586   | 5.4     | U | cortactin isoform a [Homo sapiens]                                                         |      |   |                                 |
| gi 20357556 ref N |                          | 1      | 0.029  | 513     | 57467   | 5.3     | U | cortactin isoform b [Homo sapiens]                                                         |      |   |                                 |
|                   | HsFLAG-MOCK_300mM_T      | 3.5724 | 0.3041 | 1686.04 | 1685.84 | 7278.8  | 1 | 855.9                                                                                      | 57.1 | 3 | K.TVQSGHQBHINIHK.L              |
| gi 4885105 ref NF |                          | 1      | 0.027  | 559     | 61493   | 7.5     | U | chromatin assembly factor 1 subunit B [Homo sapiens]                                       |      |   |                                 |
| *                 | HsHeLa3_Ti_103.1166.116  | 3.2412 | 0.2132 | 1540.65 | 1540.63 | 4898.8  | 1 | 787.1                                                                                      | 67.9 | 2 | R.TQDPSSPGTTPPQAR.Q             |
| gi 23111038 ref N |                          | 1      | 0.027  | 519     | 58471   | 5.1     | U | sorting nexin 2 [Homo sapiens]                                                             |      |   |                                 |

|                   |                          |        |        |         |         |         |     |        |      |   |                                                                                       |
|-------------------|--------------------------|--------|--------|---------|---------|---------|-----|--------|------|---|---------------------------------------------------------------------------------------|
| *                 | HsFLAG-Control_HeLa_S1(  | 3.7094 | 0.3369 | 1583.61 | 1583.87 | 7607.6  | 1   | 1535.6 | 76.9 | 2 | K.YLHVGYIVPPAPEK.S                                                                    |
| gi 89038196 ref > |                          | 5      | 6      | 0.026   | 2855    | 315119  | 6.8 | U      |      |   | PREDICTED: MAX dimerization protein 5 isoform 1 [Homo sapiens]                        |
| gi 89038895 ref > |                          | 5      | 6      | 0.026   | 2855    | 315105  | 6.8 | U      |      |   | PREDICTED: similar to MAX-interacting protein isoform 6 [Homo sapiens]                |
| gi 89038893 ref > |                          | 5      | 6      | 0.026   | 2855    | 315105  | 6.8 | U      |      |   | PREDICTED: similar to MAX-interacting protein isoform 5 [Homo sapiens]                |
| gi 89038198 ref > |                          | 5      | 6      | 0.026   | 2855    | 315119  | 6.8 | U      |      |   | PREDICTED: MAX dimerization protein 5 isoform 2 [Homo sapiens]                        |
|                   | HsFlag1P_Ti_102.2392.239 | 2.83   | 0.2464 | 1432.83 | 1433.66 | 6617.8  | 3   | 602.4  | 58.3 | 1 | K.LNSVDPTMSIDLK.Y                                                                     |
|                   | HsF-IP-293-MG_Ti_102.249 | 4.0219 | 0.3815 | 2396.96 | 2397.52 | 9038.1  | 1   | 1357   | 55   | 2 | K.TCQENSVDVFQQEQGISDLLGK.S                                                            |
|                   | HsF-IP-293-MG_Ti_103.192 | 2.838  | 0.2575 | 1288.42 | 1288.49 | 5452.6  | 1   | 804.6  | 72.7 | 1 | R.ISNPSAFSIVPR.R                                                                      |
|                   | HsFLAG-Control_HeLa_NE   | 2.8288 | 0.0956 | 1523.65 | 1523.64 | 9297.1  | 1   | 787.9  | 57.7 | 1 | R.AFSEIQGLTDQADK.L                                                                    |
|                   | Hs293FLP_TREX_Ti_104.2   | 2.581  | 0.2606 | 1388.51 | 1388.65 | 6845.5  | 2   | 625.2  | 58.3 | 1 | R.VTLGPTQVFLANK.D                                                                     |
| gi 21071056 ref > |                          | 3      | 3      | 0.026   | 1647    | 184644  | 7.9 | U      |      |   | SWI/SNF-related matrix-associated actin-dependent regulator of chromatin a4 [Homo sap |
| *                 | HsHeLa3_Ti_105.2147.214  | 3.6155 | 0.3509 | 1667.59 | 1665.85 | 5578.5  | 1   | 1341.3 | 71.4 | 1 | R.GLQSYAVAHAVTER.V                                                                    |
|                   | HsHeLa3_Ti_106.3032.303  | 3.5041 | 0.3648 | 1777.42 | 1776.14 | 5682.2  | 1   | 726.5  | 57.1 | 1 | K.TIQTIALITYLMEHK.R                                                                   |
|                   | HsHeLa3_Ti_106.2074.207  | 3.293  | 0.2414 | 1514.9  | 1512.75 | 7161.7  | 1   | 1568.5 | 75   | 1 | K.LTQVLNTHYVAPR.R                                                                     |
| gi 38201619 ref > |                          | 2      | 2      | 0.026   | 1403    | 154804  | 5.2 | U      |      |   | eukaryotic translation initiation factor 4 gamma, 1 isoform 4 [Homo sapiens]          |
| gi 38201627 ref > |                          | 2      | 2      | 0.024   | 1512    | 166588  | 5.2 | U      |      |   | eukaryotic translation initiation factor 4 gamma, 1 isoform 2 [Homo sapiens]          |
| gi 38201625 ref > |                          | 2      | 2      | 0.025   | 1435    | 158516  | 5.2 | U      |      |   | eukaryotic translation initiation factor 4 gamma, 1 isoform 3 [Homo sapiens]          |
| gi 38201623 ref > |                          | 2      | 2      | 0.023   | 1599    | 175460  | 5.3 | U      |      |   | eukaryotic translation initiation factor 4 gamma, 1 isoform 1 [Homo sapiens]          |
| gi 38201621 ref > |                          | 2      | 2      | 0.023   | 1599    | 175460  | 5.3 | U      |      |   | eukaryotic translation initiation factor 4 gamma, 1 isoform 1 [Homo sapiens]          |
|                   | HsFLAG-Control_HeLa_NE   | 3.3975 | 0.3496 | 2066.15 | 2065.26 | 7227.3  | 1   | 440.4  | 41.7 | 1 | R.LQGINCGPDTFSPANLGR.T                                                                |
|                   | HsFLAG-Control_HeLa_S1(  | 2.8669 | 0.1869 | 1770.56 | 1769.01 | 7602.8  | 1   | 750.9  | 53.1 | 1 | R.GLPLVDDGGWNTVPISK.G                                                                 |
| gi 31742532 ref > |                          | 2      | 3      | 0.026   | 1248    | 138907  | 5.4 | U      |      |   | diaphanous 1 [Homo sapiens]                                                           |
| *                 | HsFLAG-Control_HeLa_S1(  | 4.3342 | 0.4179 | 2129.92 | 2129.24 | 7843.6  | 1   | 1085   | 58.8 | 2 | R.VQLNVFDEQGEEDSYDLK.G                                                                |
| *                 | HsFLAG-Control_HeLa_S1(  | 3.3304 | 0.3548 | 1521.9  | 1521.72 | 9287.6  | 1   | 1173.8 | 60.7 | 1 | K.AGCAVTSLLASELTK.D                                                                   |
| gi 13489083 ref > |                          | 1      | 6      | 0.026   | 793     | 88952   | 4.6 | U      |      |   | SAPS domain family, member 3 [Homo sapiens]                                           |
| *                 | HsFLAG-Control_HeLa_S1(  | 4.7711 | 0.4692 | 2388.81 | 2387.78 | 8482.9  | 1   | 1044.1 | 50   | 6 | K.LYSFLLNDSPLNPLLASFFSK.V                                                             |
| gi 16753207 ref > |                          | 1      | 3      | 0.026   | 624     | 65696   | 5.2 | U      |      |   | ubiquilin 2 [Homo sapiens]                                                            |
| *                 | HsFLAG-Control_HeLa_S1(  | 5.2369 | 0.411  | 1394.45 | 1394.53 | 8678.6  | 1   | 2406   | 80   | 3 | R.GPAAAQGSAAAPAEPK.I                                                                  |
| gi 4827050 ref >  |                          | 1      | 2      | 0.026   | 494     | 56069   | 5.3 | U      |      |   | ubiquitin specific protease 14 [Homo sapiens]                                         |
| *                 | HsFLAG-Control_MG_293_   | 4.1909 | 0.291  | 1372.93 | 1372.61 | 9773.5  | 1   | 1529.7 | 70.8 | 2 | K.AQLFALTGVQPAR.Q                                                                     |
| gi 30794368 ref > |                          | 2      | 2      | 0.025   | 1582    | 181153  | 7   | U      |      |   | polybromo 1 isoform 2 [Homo sapiens]                                                  |
| gi 41281917 ref > |                          | 2      | 2      | 0.025   | 1582    | 182117  | 6.8 | U      |      |   | polybromo 1 isoform 4 [Homo sapiens]                                                  |
| gi 30794372 ref > |                          | 2      | 2      | 0.025   | 1602    | 183689  | 6.7 | U      |      |   | polybromo 1 isoform 1 [Homo sapiens]                                                  |
|                   | HsHeLa3_Ti_105.3324.332  | 3.4492 | 0.3915 | 2426.7  | 2426.74 | 3652.4  | 1   | 423.9  | 47.5 | 1 | R.LSNLPTVDPIAVCHELYNTIR.D                                                             |
|                   | HsGST-MOCK_Ti_302.372    | 2.6137 | 0.0802 | 2242.46 | 2242.52 | 3240.4  | 6   | 182.3  | 44.4 | 1 | K.EVFLSNLEETCPMTCILGK.C                                                               |
| gi 30410720 ref > |                          | 1      | 3      | 0.025   | 894     | 101982  | 6.6 | U      |      |   | Sec3 isoform 1 [Homo sapiens]                                                         |
| gi 67944634 ref > |                          | 1      | 3      | 0.025   | 894     | 101982  | 6.6 | U      |      |   | Sec3 isoform 1 [Homo sapiens]                                                         |
|                   | HsHeLa3_Ti_106.4328.432  | 2.9349 | 0.3029 | 2415.1  | 2414.8  | 8980    | 1   | 551.9  | 38.1 | 3 | K.VGILPFVAEFEFAGLAESIFK.N                                                             |
| gi 30581135 ref > |                          | 2      | 2      | 0.024   | 1233    | 143233  | 7.6 | U      |      |   | SMC1 structural maintenance of chromosomes 1-like 1 [Homo sapiens]                    |
| *                 | HsFLAG-Control_HeLa_NE   | 2.9875 | 0.0829 | 1214.98 | 1215.35 | 10045.2 | 2   | 1210.8 | 77.8 | 1 | K.LNEQQSVLQR.I                                                                        |
| *                 | HsFLAG-Control_HeLa_NE   | 3.6269 | 0.3462 | 2176.76 | 2177.38 | 9999.4  | 1   | 916.6  | 47.2 | 1 | K.VLTFDLTKYPDANPNPNEQ.-                                                               |
| gi 33356547 ref > |                          | 1      | 2      | 0.024   | 904     | 101896  | 5.5 | U      |      |   | minichromosome maintenance protein 2 [Homo sapiens]                                   |
| *                 | HsHeLa3_Ti_102.3737.373  | 4.3791 | 0.3805 | 2540.7  | 2539.64 | 5875.5  | 1   | 877.4  | 50   | 2 | R.ATEDGEEDEEMIESIENLEDLK.G                                                            |
| gi 11386151 ref > |                          | 1      | 2      | 0.024   | 411     | 46369   | 8.6 | U      |      |   | TEA domain family member 1 [Homo sapiens]                                             |
| *                 | HsHeLa3_Ti_105.2283.228  | 3.17   | 0.2568 | 1122.93 | 1121.32 | 6558.1  | 2   | 889.8  | 77.8 | 2 | K.GPQNAFFLVK.F                                                                        |
| gi 77404397 ref > |                          | 1      | 2      | 0.023   | 910     | 101997  | 7.2 | U      |      |   | staphylococcal nuclease domain containing 1 [Homo sapiens]                            |
| *                 | HsFLAG-Control_HeLa_S1(  | 3.9857 | 0.3531 | 2306.72 | 2307.56 | 5193.5  | 1   | 660.9  | 52.5 | 2 | R.NLPGLVQEGEPFSEEATLFTK.E                                                             |
| gi 89030074 ref > |                          | 1      | 2      | 0.023   | 828     | 89468   | 5.5 | U      |      |   | PREDICTED: inositol polyphosphate-5-phosphatase E isoform 3 [Homo sapiens]            |
| gi 89030711 ref > |                          | 1      | 2      | 0.015   | 1261    | 137715  | 5.9 | U      |      |   | PREDICTED: similar to Protein KIAA0310 isoform 40 [Homo sapiens]                      |

|                            |        |        |         |         |        |       |                                                                                                                                                                                                                                                                                                                                              |
|----------------------------|--------|--------|---------|---------|--------|-------|----------------------------------------------------------------------------------------------------------------------------------------------------------------------------------------------------------------------------------------------------------------------------------------------------------------------------------------------|
| gi 89030709 ref X          | 1      | 2      | 0.022   | 852     | 92244  | 6 U   | PREDICTED: similar to Protein KIAA0310 isoform 39 [Homo sapiens]                                                                                                                                                                                                                                                                             |
| gi 89030707 ref X          | 1      | 2      | 0.022   | 879     | 94595  | 5.8 U | PREDICTED: similar to Protein KIAA0310 isoform 38 [Homo sapiens]                                                                                                                                                                                                                                                                             |
| gi 89030705 ref X          | 1      | 2      | 0.021   | 899     | 96861  | 6 U   | PREDICTED: similar to Protein KIAA0310 isoform 37 [Homo sapiens]                                                                                                                                                                                                                                                                             |
| gi 89030703 ref X          | 1      | 2      | 0.023   | 832     | 89978  | 5.8 U | PREDICTED: similar to Protein KIAA0310 isoform 36 [Homo sapiens]                                                                                                                                                                                                                                                                             |
| gi 89030701 ref X          | 1      | 2      | 0.023   | 810     | 87048  | 5.5 U | PREDICTED: similar to Protein KIAA0310 isoform 35 [Homo sapiens]                                                                                                                                                                                                                                                                             |
| gi 89030697 ref X          | 1      | 2      | 0.045   | 426     | 44371  | 5.6 U | PREDICTED: similar to Protein KIAA0310 isoform 33 [Homo sapiens]                                                                                                                                                                                                                                                                             |
| gi 89030685 ref X          | 1      | 2      | 0.022   | 879     | 94595  | 5.8 U | PREDICTED: similar to Protein KIAA0310 isoform 27 [Homo sapiens]                                                                                                                                                                                                                                                                             |
| gi 89030683 ref X          | 1      | 2      | 0.023   | 828     | 89468  | 5.5 U | PREDICTED: similar to Protein KIAA0310 isoform 26 [Homo sapiens]                                                                                                                                                                                                                                                                             |
| gi 89030675 ref X          | 1      | 2      | 0.015   | 1281    | 139980 | 6 U   | PREDICTED: similar to Protein KIAA0310 isoform 21 [Homo sapiens]                                                                                                                                                                                                                                                                             |
| gi 89030110 ref X          | 1      | 2      | 0.015   | 1281    | 139980 | 6 U   | PREDICTED: inositol polyphosphate-5-phosphatase E isoform 1 [Homo sapiens]                                                                                                                                                                                                                                                                   |
| gi 89030108 ref X          | 1      | 2      | 0.015   | 1261    | 137715 | 5.9 U | PREDICTED: inositol polyphosphate-5-phosphatase E isoform 20 [Homo sapiens]                                                                                                                                                                                                                                                                  |
| gi 89030106 ref X          | 1      | 2      | 0.022   | 852     | 92244  | 6 U   | PREDICTED: inositol polyphosphate-5-phosphatase E isoform 19 [Homo sapiens]                                                                                                                                                                                                                                                                  |
| gi 89030104 ref X          | 1      | 2      | 0.022   | 879     | 94595  | 5.8 U | PREDICTED: inositol polyphosphate-5-phosphatase E isoform 18 [Homo sapiens]                                                                                                                                                                                                                                                                  |
| gi 89030102 ref X          | 1      | 2      | 0.021   | 899     | 96861  | 6 U   | PREDICTED: inositol polyphosphate-5-phosphatase E isoform 17 [Homo sapiens]                                                                                                                                                                                                                                                                  |
| gi 89030100 ref X          | 1      | 2      | 0.023   | 832     | 89978  | 5.8 U | PREDICTED: inositol polyphosphate-5-phosphatase E isoform 16 [Homo sapiens]                                                                                                                                                                                                                                                                  |
| gi 89030098 ref X          | 1      | 2      | 0.023   | 810     | 87048  | 5.5 U | PREDICTED: inositol polyphosphate-5-phosphatase E isoform 15 [Homo sapiens]                                                                                                                                                                                                                                                                  |
| gi 89030094 ref X          | 1      | 2      | 0.045   | 426     | 44371  | 5.6 U | PREDICTED: inositol polyphosphate-5-phosphatase E isoform 13 [Homo sapiens]                                                                                                                                                                                                                                                                  |
| gi 89030082 ref X          | 1      | 2      | 0.022   | 879     | 94595  | 5.8 U | PREDICTED: inositol polyphosphate-5-phosphatase E isoform 7 [Homo sapiens]                                                                                                                                                                                                                                                                   |
| gi 39777601 ref N          | 1      | 2      | 0.023   | 693     | 76731  | 6 U   | HsFLAG-Control_HeLa_S1( 3.3396 0.3824 1903.74 1902.2 5768.8 1 490 50 2 R.LLPSAPQTLPDGPLASPAR.V<br>transglutaminase 3 precursor [Homo sapiens]                                                                                                                                                                                                |
| * gi 89037519 ref X        | 3      | 4      | 0.022   | 2779    | 295336 | 5.2 U | HsFLAG-Control_Hela_Ti_1 4.7449 0.3552 1662.52 1662.85 7210.5 1 1883.3 76.7 2 R.SQGVFQCGPASVIGV.R.E<br>PREDICTED: AHNAK nucleoprotein 2 isoform 1 [Homo sapiens]                                                                                                                                                                             |
| gi 89037828 ref X          | 3      | 4      | 0.076   | 793     | 85128  | 4.8 U | PREDICTED: AHNAK nucleoprotein 2 isoform 3 [Homo sapiens]                                                                                                                                                                                                                                                                                    |
| gi 89037826 ref X          | 3      | 4      | 0.022   | 2779    | 295336 | 5.2 U | PREDICTED: similar to AHNAK nucleoprotein isoform 1 isoform 2 [Homo sapiens]                                                                                                                                                                                                                                                                 |
| gi 62122917 ref N          | 3      | 5      | 0.022   | 2391    | 248072 | 8.3 U | HsHeLa3_Ti_103.3208.320 2.9323 0.2802 2010.81 2012.23 7795.1 1 1095.4 55.9 2 R.FSFPAPSEDDVFIPTV.R.E<br>HsHeLa3_Ti_103.2834.283 4.0361 0.2818 2370.98 2370.71 5514.4 3 574.7 45.7 1 K.AGAGVPGEQPVDLNLPLEAPPISK.V<br>HsHeLa3_Ti_104.1551.155 3.489 0.2265 1964.54 1963.2 5645.2 1 534 50 1 R.SAPIQTQPEARPEALPK.K<br>filaggrin 2 [Homo sapiens] |
| * HsFLAG-Control_Hela_Ti_1 | 3.4944 | 0.3349 | 1270.39 | 1270.51 | 5182.7 | 1     | 1080.6 85 2 R.SVTVIDVIFYK.Y                                                                                                                                                                                                                                                                                                                  |
| * HsFLAG-Control_Hela_Ti_1 | 5.3008 | 0.3371 | 3210.52 | 3209.18 | 9854.1 | 1     | 1346.1 29.2 2 K.GGQGHGCVSGGQPSGCGQPESNPCSQSYSQR.G                                                                                                                                                                                                                                                                                            |
| * HsFLAG-Control_293_Ti_1( | 2.6922 | 0.2451 | 1273.22 | 1273.31 | 7588.5 | 1     | 766.2 65 1 R.ASHFQSHSSER.Q                                                                                                                                                                                                                                                                                                                   |
| gi 19913408 ref N          | 2      | 3      | 0.022   | 1621    | 182661 | 8.1 U | HsFLAG-Control_HeLa_NE 4.0224 0.2394 1462.63 1462.64 7531.2 1 2080 87.5 1 K.IFDEILVNAADNK.Q<br>HsGST-MOCK_Ti_403.485 5.5362 0.4339 2488.22 2488.75 8800.7 1 1602.2 57.1 2 K.VYVPALIFGQLLTSSNYDDEK.K<br>FtsJ homolog 3 [Homo sapiens]                                                                                                         |
| * HsFLAG-MOCK_300mM_T      | 5.0419 | 0.4236 | 2391.17 | 2390.52 | 6633.8 | 1     | 815 52.8 3 R.YTFNEDEGELPEWVQEEK.Q                                                                                                                                                                                                                                                                                                            |
| gi 27735067 ref N          | 2      | 2      | 0.022   | 679     | 75357  | 6.8 U | hypothetical protein LOC126353 [Homo sapiens]                                                                                                                                                                                                                                                                                                |
| * HsHeLa3_Ti_103.1130.113  | 2.1708 | 0.232  | 1340.58 | 1341.46 | 6354.9 | 1     | 420.3 50 1 R.GTPAGTTPGASQAPK.A                                                                                                                                                                                                                                                                                                               |
| * HsHeLa3_Ti_103.1122.112  | 2.6618 | 0.162  | 1341.67 | 1341.46 | 4851.9 | 1     | 547.2 60.7 1 R.GTPAGTTPGASQAPK.A                                                                                                                                                                                                                                                                                                             |
| gi 38569466 ref N          | 1      | 2      | 0.022   | 552     | 59690  | 9 U   | ROD1 regulator of differentiation 1 [Homo sapiens]                                                                                                                                                                                                                                                                                           |
| * HsFLAG-Control_HeLa_NE   | 3.3078 | 0.308  | 1493.37 | 1492.63 | 5318.3 | 1     | 994.4 81.8 2 R.SQPVIYIYSNHR.E                                                                                                                                                                                                                                                                                                                |
| gi 4758032 ref N           | 1      | 2      | 0.021   | 906     | 102487 | 5.3 U | coatomer protein complex, subunit beta 2 (beta prime) [Homo sapiens]                                                                                                                                                                                                                                                                         |
| * HsFLAG-Control_HeLa_NE   | 3.9681 | 0.3865 | 2065.29 | 2066.27 | 7294   | 1     | 1208.7 61.1 2 K.AAESLADPTEYENLFPGLK.E                                                                                                                                                                                                                                                                                                        |
| gi 11559929 ref N          | 1      | 2      | 0.021   | 874     | 97718  | 5.5 U | coatomer protein complex, subunit gamma 1 [Homo sapiens]                                                                                                                                                                                                                                                                                     |
| * HsFLAG-Control_HeLa_S1(  | 4.111  | 0.4025 | 2007.94 | 2008.19 | 6651.8 | 1     | 802.8 52.9 2 K.SSPEPVALTESEYVIR.C                                                                                                                                                                                                                                                                                                            |
| gi 21040314 ref N          | 3      | 4      | 0.02    | 2303    | 250386 | 5.6 U | SON DNA-binding protein isoform B [Homo sapiens]                                                                                                                                                                                                                                                                                             |
| gi 38146099 ref N          | 3      | 4      | 0.019   | 2386    | 259619 | 5.7 U | SON DNA-binding protein isoform G [Homo sapiens]                                                                                                                                                                                                                                                                                             |
| gi 21040326 ref N          | 3      | 4      | 0.019   | 2426    | 263827 | 5.6 U | SON DNA-binding protein isoform F [Homo sapiens]                                                                                                                                                                                                                                                                                             |
| gi 21040322 ref N          | 3      | 4      | 0.019   | 2325    | 252251 | 5.4 U | SON DNA-binding protein isoform C [Homo sapiens]                                                                                                                                                                                                                                                                                             |



|                   |                          |        |        |         |         |         |   |                                                                                     |
|-------------------|--------------------------|--------|--------|---------|---------|---------|---|-------------------------------------------------------------------------------------|
| gi 21040320 ref N | 3                        | 4      | 0.021  | 2140    | 232307  | 6       | U | SON DNA-binding protein isoform A [Homo sapiens]                                    |
| gi 21040318 ref N | 3                        | 4      | 0.021  | 2108    | 228179  | 5.4     | U | SON DNA-binding protein isoform E [Homo sapiens]                                    |
|                   | HsFlag1P_Ti_104.3127.312 | 2.9349 | 0.2942 | 1857.76 | 1858.23 | 3753.3  | 4 | 347.3 47.1 1 K.ILDSFAAAPVPTTTLVLK.S                                                 |
|                   | Hs293FLP_TREX_Ti_102.2   | 3.305  | 0.2497 | 1375.8  | 1373.55 | 8153.9  | 3 | 1040.9 66.7 2 K.ESDQTLAALLSPK.E                                                     |
|                   | Hs293FLP_TREX_Ti_102.1   | 3.8843 | 0.4    | 1355.36 | 1355.53 | 6844.9  | 1 | 1572.4 76.9 1 R.AGIEGPLLASDVGR.D                                                    |
| gi 44890062 ref N | 1                        | 2      | 0.02   | 1045    | 114989  | 9.2     | U | hypothetical protein LOC91748 [Homo sapiens]                                        |
| *                 | HsHeLa3_Ti_106.2698.269  | 3.7305 | 0.2732 | 2288.05 | 2287.67 | 5035.2  | 1 | 811.5 52.5 2 K.ALLQDSAPQPALPQVQIPFPR.R                                              |
| gi 24308033 ref N | 1                        | 3      | 0.02   | 1015    | 110064  | 4.7     | U | formin binding protein 4 [Homo sapiens]                                             |
| *                 | HsHeLa3_Ti_102.1229.122  | 5.1196 | 0.4672 | 2050.85 | 2050.02 | 6622.1  | 1 | 1294.2 57.9 3 K.TGTDSNSTESSETSTGSLCK.E                                              |
| gi 7662018 ref NF | 2                        | 3      | 0.019  | 2039    | 229479  | 7       | U | PHD finger protein 3 [Homo sapiens]                                                 |
| *                 | HsGST-MOCK_Ti_403.430    | 3.1959 | 0.164  | 2147.51 | 2146.45 | 6655.7  | 1 | 504.8 44.4 1 K.SFSLDEPPLFIPDNIAIR.R                                                 |
| *                 | HsFLAG-MOCK_300mM_T      | 4.2153 | 0.4816 | 2019.71 | 2019.27 | 4124.5  | 1 | 769 57.9 2 K.GVLNVHPAASASKPSADQIR.Q                                                 |
| gi 33946327 ref N | 2                        | 3      | 0.019  | 2090    | 213618  | 7.5     | U | nucleoporin 214kDa [Homo sapiens]                                                   |
| *                 | HsFLAG-Control_HeLa_S1(  | 2.8455 | 0.2698 | 1672.32 | 1672.79 | 4415.6  | 4 | 343.4 50 1 K.SPGSTPTTPTSSQAPQK.L                                                    |
| *                 | HsFLAG-Control_HeLa_NE   | 4.5084 | 0.4278 | 2251.59 | 2252.57 | 4890.2  | 1 | 573.7 47.6 2 K.LGELLFPSSLAGETLGSFSLGR.V                                             |
| gi 34577122 ref N | 1                        | 2      | 0.019  | 969     | 105427  | 5.4     | U | nuclear factor kappa-B, subunit 1 [Homo sapiens]                                    |
| *                 | HsHeLa3_Ti_105.1458.145  | 3.896  | 0.3991 | 1833.89 | 1832.93 | 6156.6  | 1 | 935.8 61.8 2 R.YVCEGSPHGGPLGASSEK.N                                                 |
| gi 4503337 ref NF | 1                        | 3      | 0.019  | 514     | 57674   | 9.4     | U | dyskerin [Homo sapiens]                                                             |
| *                 | HsHeLa3_Ti_103.1255.125  | 2.1134 | 0.1929 | 983.56  | 984.14  | 5223.6  | 1 | 590.8 72.2 3 K.APQVVAAAK.T                                                          |
| gi 41406064 ref N | 2                        | 6      | 0.018  | 1976    | 228997  | 5.5     | U | myosin, heavy polypeptide 10, non-muscle [Homo sapiens]                             |
|                   | HsFLAG-Control_Hela_Ti_1 | 4.7548 | 0.4555 | 1962.12 | 1963.06 | 8836.7  | 1 | 1809.5 68.8 5 R.TQLEEELEDELQATEDAK.L                                                |
| *                 | HsFLAG-Control_293_Ti_2( | 2.9209 | 0.113  | 2046.93 | 2046.24 | 9660.3  | 1 | 569.5 44.1 1 K.SLEAEILQLQEELASSER.A                                                 |
| gi 15987121 ref N | 1                        | 2      | 0.018  | 1297    | 143732  | 8.8     | U | hypothetical protein LOC23223 [Homo sapiens]                                        |
| *                 | HsHeLa3_Ti_105.3934.393  | 2.8352 | 0.4091 | 2472.53 | 2472.85 | 9264.8  | 1 | 496.4 36.4 2 K.NFLPILFNLYGQPVAAGDTPAPR.R                                            |
| gi 13491166 ref N | 2                        | 2      | 0.018  | 1186    | 126473  | 6.8     | U | pumilio 1 isoform 2 [Homo sapiens]                                                  |
| gi 66932909 ref N | 2                        | 2      | 0.018  | 1188    | 126685  | 6.8     | U | pumilio 1 isoform 1 [Homo sapiens]                                                  |
| gi 13491168 ref N | 2                        | 2      | 0.02   | 1064    | 114003  | 7.1     | U | pumilio homolog 2 [Homo sapiens]                                                    |
|                   | HsHeLa3_Ti_103.1278.127  | 2.1616 | 0.1994 | 1077.51 | 1078.21 | 3903.8  | 5 | 405 60 1 R.YISAAPGAEAK.Y                                                            |
|                   | HsHeLa3_Ti_102.1585.158  | 2.9948 | 0.26   | 1227.54 | 1228.35 | 7696.7  | 1 | 846.4 77.8 1 K.DQYANYVVQK.M                                                         |
| gi 55749531 ref N | 2                        | 2      | 0.018  | 895     | 100228  | 5.7     | U | splicing factor 3B subunit 2 [Homo sapiens]                                         |
| *                 | HsFLAG-Control_293_Ti_2( | 2.7773 | 0.1685 | 1185.77 | 1185.37 | 8316.9  | 2 | 621.2 66.7 1 K.RAAVLLEQER.Q                                                         |
| *                 | HsFLAG-MOCK_300mM_T      | 3.0579 | 0.1567 | 1885.18 | 1883.16 | 4225.5  | 3 | 331.7 50 1 K.RAAVLLEQERQEIAM.M                                                      |
| gi 11345460 ref N | 1                        | 2      | 0.018  | 669     | 74266   | 8.5     | U | hypothetical protein LOC60558 [Homo sapiens]                                        |
| *                 | HsHeLa_Control-MG_Ti_10  | 3.3073 | 0.3117 | 1325.02 | 1324.48 | 7321.3  | 1 | 1136.9 77.3 2 R.NFSIVAHVDHGK.S                                                      |
| gi 18105007 ref N | 1                        | 6      | 0.017  | 2225    | 242981  | 6.5     | U | carbamoylphosphate synthetase 2/aspartate transcarbamylase/dihydroorotase [Homo sap |
|                   |                          |        |        |         |         |         |   | R.AAFALGGLGSGFASNREELSALVAPAFHTSQVLVDK                                              |
| *                 | Hs293FLP_Ti_306.3340.33  | 5.6471 | 0.3719 | 3705.76 | 3704.18 | 4141.9  | 1 | 517.2 24.3 6 .S                                                                     |
| gi 22748937 ref N | 1                        | 2      | 0.017  | 1204    | 136311  | 5.8     | U | exportin 5 [Homo sapiens]                                                           |
| *                 | HsFLAG-Control_HeLa_S1(  | 3.8566 | 0.369  | 2151.77 | 2152.54 | 4046.4  | 1 | 665.5 57.9 2 K.SAILGLPQLLELNDSPVFK.T                                                |
| gi 8922388 ref NF | 1                        | 2      | 0.017  | 759     | 85766   | 9.2     | U | RNA binding motif protein 28 [Homo sapiens]                                         |
| *                 | Hs293FLP_TREX_Ti_105.2   | 3.131  | 0.1631 | 1470.2  | 1469.72 | 4508.4  | 9 | 518.8 66.7 2 R.LINNNPEIFGPLK.R                                                      |
| gi 61676188 ref N | 3                        | 3      | 0.016  | 4374    | 481896  | 5.2     | U | HECT, UBA and WWE domain containing 1 [Homo sapiens]                                |
| *                 | HsFLAG-Control_HeLa_S1(  | 2.8547 | 0.2959 | 1819.73 | 1818.21 | 3982    | 2 | 284.5 53.1 1 K.TTPLKPSPLPVIDTIK.E                                                   |
| *                 | HsFLAG-Control_HeLa_S1(  | 3.0817 | 0.265  | 2237.76 | 2238.59 | 11593.3 | 1 | 729.5 40.5 1 R.LLGPSAAADILQLSSSLPLQSR.G                                             |
| *                 | HsFLAG-Control_HeLa_S1(  | 3.7483 | 0.2754 | 3546.42 | 3544.99 | 7505    | 1 | 618.4 24.2 1 R.ESQLAHIKDEPPPLSPAPLTPATPSSLDPPFSR.E                                  |
| gi 24430149 ref N | 1                        | 3      | 0.016  | 1391    | 155199  | 6.2     | U | nucleoporin 155kDa isoform 1 [Homo sapiens]                                         |
| gi 4758844 ref NF | 1                        | 3      | 0.017  | 1332    | 149016  | 6.3     | U | nucleoporin 155kDa isoform 2 [Homo sapiens]                                         |
|                   | HsGST-MOCK_Ti_403.559    | 2.922  | 0.1288 | 2486.44 | 2487.82 | 4070.9  | 5 | 222.2 35.7 3 R.EITAISSVPCQLLESVLQELK.G                                              |
| SHUFFLED_gi 2     | 1                        | 3      | 0.016  | 492     | 53132   | 9.4     | U | FALSE POSITIVE                                                                      |

|                          |          |          |              |            |              |              |                       |        |      |   |                                                                         |
|--------------------------|----------|----------|--------------|------------|--------------|--------------|-----------------------|--------|------|---|-------------------------------------------------------------------------|
| <b>SHUFFLED_gij5</b>     | <b>1</b> | <b>3</b> | <b>0.016</b> | <b>492</b> | <b>53132</b> | <b>9.4 U</b> | <b>FALSE POSITIVE</b> |        |      |   |                                                                         |
| HsFLAG-Control_HeLa_S1(  | 2.1823   |          | 0.1214       | 897.58     | 898.137      | 4242.6       | 5                     | 493.1  | 71.4 | 3 | K.PLTAVRLK.A                                                            |
| gij19718731 ref N        | 2        | 3        | 0.015        | 1362       | 152218       | 9.2 U        |                       |        |      |   | bromodomain-containing protein 4 isoform long [Homo sapiens]            |
| HsFLAG-MOCK_300mM_T      | 4.0791   |          | 0.2595       | 1507.85    | 1506.79      | 6798.6       | 1                     | 1130.5 | 70.8 | 2 | R.VVHIIQSREPSLK.N                                                       |
| HsFLAG-MOCK_300mM_T      | 1.843    |          | 0.0826       | 836.9      | 836.025      | 4520.4       | 2                     | 260.3  | 75   | 1 | K.IHSPIIR.S                                                             |
| gij4502945 ref NF        | 3        | 6        | 0.015        | 1464       | 138912       | 5.9 U        |                       |        |      |   | alpha 1 type I collagen preproprotein [Homo sapiens]                    |
| HsHeLa_Control-MG_Ti_10  | 3.9882   |          | 0.4608       | 1963.04    | 1963.12      | 5233.8       | 1                     | 686.8  | 52.4 | 2 | K.SGDRGETGPAGPAGPVGPVPGAR.G                                             |
| HsHeLa_Control-MG_Ti_10  | 3.5906   |          | 0.1136       | 1963.62    | 1963.12      | 6931         | 2                     | 1235.7 | 40.5 | 2 | K.SGDRGETGPAGPAGPVGPVPGAR.G                                             |
| HsHeLa_Control-MG_Ti_10  | 3.331    |          | 0.4249       | 1548.09    | 1547.71      | 5772.6       | 1                     | 704.3  | 55.9 | 2 | R.GETGPAGPAGPVGPVPGAR.G                                                 |
| gij51702222 ref N        | 1        | 2        | 0.015        | 685        | 75599        | 9.8 U        |                       |        |      |   | hypothetical protein LOC144108 [Homo sapiens]                           |
| HsHeLa_Control-MG_Ti_20  | 3.0213   |          | 0.1809       | 1238.62    | 1238.48      | 8290.1       | 2                     | 1113.9 | 77.8 | 2 | R.IELKHDKKAR.A                                                          |
| gij38679960 ref N        | 2        | 3        | 0.014        | 2383       | 269997       | 6.5 U        |                       |        |      |   | acetyl-Coenzyme A carboxylase alpha isoform 1 [Homo sapiens]            |
| gij38679977 ref N        | 2        | 3        | 0.014        | 2346       | 265551       | 6.4 U        |                       |        |      |   | acetyl-Coenzyme A carboxylase alpha isoform 2 [Homo sapiens]            |
| gij38679967 ref N        | 2        | 3        | 0.014        | 2346       | 265551       | 6.4 U        |                       |        |      |   | acetyl-Coenzyme A carboxylase alpha isoform 2 [Homo sapiens]            |
| HsFLAG-Control_HeLa_S1(  | 4.6342   |          | 0.3931       | 2198.41    | 2196.37      | 8595.4       | 1                     | 1313   | 57.9 | 2 | R.FIIGSVSEDNSEDEISNLVK.L                                                |
| HsFLAG-Control_HeLa_S1(  | 2.9831   |          | 0.2579       | 1594.17    | 1592.84      | 7283.9       | 1                     | 483.8  | 50   | 1 | R.IGSFGPQEDLLFLR.A                                                      |
| gij41281521 ref N        | 1        | 3        | 0.014        | 1401       | 157168       | 6.6 U        |                       |        |      |   | chromosome condensation-related SMC-associated protein 1 [Homo sapiens] |
| HsFLAG-Control_HeLa_NE   | 3.4254   |          | 0.3825       | 2108.3     | 2109.26      | 8005.3       | 1                     | 576    | 47.2 | 3 | R.YQPLASTASDNDVFVTPEPR.R                                                |
| gij39930353 ref N        | 1        | 2        | 0.013        | 1042       | 117761       | 6.7 U        |                       |        |      |   | superkiller viralicidic activity 2-like 2 [Homo sapiens]                |
| HsFLAG-Control_HeLa_NE   | 3.6928   |          | 0.415        | 1568.77    | 1569.67      | 7400.2       | 1                     | 962.5  | 61.5 | 2 | R.DVDFEGTDEPIFGK.K                                                      |
| gij60097902 ref N        | 4        | 14       | 0.012        | 4061       | 435180       | 9.2 U        |                       |        |      |   | filaggrin [Homo sapiens]                                                |
| HsFLAG-Control_Hela_Ti_1 | 3.2487   |          | 0.2209       | 960.32     | 959.991      | 5197.6       | 2                     | 920.8  | 100  | 1 | K.RHESSEK.K                                                             |
| HsFLAG-Control_Hela_Ti_1 | 3.4631   |          | 0.3323       | 1553.22    | 1553.63      | 9694.2       | 1                     | 1196.9 | 66.7 | 2 | K.GYSPHREEEYGK.N                                                        |
| HsFLAG-Control_293_Ti_1( | 3.2934   |          | 0.3912       | 1659.87    | 1660.66      | 8671.9       | 1                     | 1266.6 | 60   | 9 | R.SGHSGSHHSHTTSQGR.S                                                    |
| HsFLAG-Control_293_Ti_1( | 2.6776   |          | 0.2348       | 1362.36    | 1361.42      | 6307.3       | 8                     | 561.5  | 59.1 | 2 | R.HHEASTHADISR.H                                                        |
| <b>SHUFFLED_gij1</b>     | <b>1</b> | <b>3</b> | <b>0.012</b> | <b>689</b> | <b>78439</b> | <b>9 U</b>   | <b>FALSE POSITIVE</b> |        |      |   |                                                                         |
| HsFLAG-Control_HeLa_S1(  | 2.0385   |          | 0.1586       | 790.44     | 790.935      | 3448.1       | 9                     | 284.2  | 71.4 | 3 | K.SGLVSVTK.V                                                            |
| gij41322908 ref N        | 3        | 5        | 0.01         | 4525       | 513712       | 5.8 U        |                       |        |      |   | pectin 1 isoform 3 [Homo sapiens]                                       |
| gij47607492 ref N        | 3        | 5        | 0.01         | 4574       | 518478       | 5.7 U        |                       |        |      |   | pectin 1 isoform 1 [Homo sapiens]                                       |
| gij41322923 ref N        | 3        | 5        | 0.01         | 4547       | 516204       | 5.8 U        |                       |        |      |   | pectin 1 isoform 11 [Homo sapiens]                                      |
| gij41322919 ref N        | 3        | 5        | 0.01         | 4547       | 516282       | 5.8 U        |                       |        |      |   | pectin 1 isoform 8 [Homo sapiens]                                       |
| gij41322916 ref N        | 3        | 5        | 0.01         | 4684       | 531796       | 6 U          |                       |        |      |   | pectin 1 isoform 6 [Homo sapiens]                                       |
| gij41322914 ref N        | 3        | 5        | 0.01         | 4551       | 516484       | 5.8 U        |                       |        |      |   | pectin 1 isoform 10 [Homo sapiens]                                      |
| gij41322912 ref N        | 3        | 5        | 0.01         | 4533       | 514780       | 5.7 U        |                       |        |      |   | pectin 1 isoform 2 [Homo sapiens]                                       |
| gij41322910 ref N        | 3        | 5        | 0.01         | 4515       | 512609       | 5.8 U        |                       |        |      |   | pectin 1 isoform 7 [Homo sapiens]                                       |
| HsFLAG-Control_HeLa_S1(  | 3.9036   |          | 0.4077       | 1710.38    | 1709.85      | 5691.6       | 1                     | 1033.7 | 71.4 | 2 | R.LLDPEDVDVPQPDEK.S                                                     |
| HsFLAG-Control_HeLa_S1(  | 3.0473   |          | 0.2497       | 1810.78    | 1809.97      | 9841.6       | 1                     | 899.3  | 56.7 | 1 | K.VQSGSESVIQEYVDLR.T                                                    |
| HsHeLa3_Ti_104.2633.263  | 4.343    |          | 0.3226       | 1570.69    | 1567.83      | 4953.4       | 1                     | 1289.7 | 73.3 | 2 | R.APVPASELLASGVLSR.A                                                    |
| gij42716275 ref N        | 1        | 2        | 0.01         | 2376       | 266937       | 7.1 U        |                       |        |      |   | CCR4-NOT transcription complex, subunit 1 isoform a [Homo sapiens]      |
| HsHeLa3_Ti_104.3264.326  | 3.494    |          | 0.3986       | 2473.8     | 2473.85      | 4261.4       | 1                     | 339.7  | 45.5 | 2 | R.NVPGFLPTNDLSQPTGFLAQM.K                                               |
| gij48762934 ref N        | 1        | 5        | 0.01         | 1366       | 129314       | 9 U          |                       |        |      |   | alpha 2 type I collagen [Homo sapiens]                                  |
| HsHeLa_Control-MG_Ti_10  | 3.2127   |          | 0.4349       | 1225.77    | 1224.32      | 7852.7       | 1                     | 1239.2 | 69.2 | 5 | R.GPAGPSGPAGKDGR.T                                                      |
| gij19923287 ref N        | 2        | 2        | 0.009        | 3703       | 404474       | 6.2 U        |                       |        |      |   | AT-binding transcription factor 1 [Homo sapiens]                        |
| HsHeLa3_Ti_103.1202.120  | 2.6648   |          | 0.196        | 1612.51    | 1612.74      | 4282.4       | 1                     | 480.4  | 57.1 | 1 | K.LAEAPSAQPNQTQEK.Q                                                     |
| HsHeLa3_Ti_103.2984.298  | 3.0803   |          | 0.3312       | 1987.54    | 1988.27      | 8452.1       | 1                     | 849.2  | 52.9 | 1 | R.TPTMLECEVLGNDIGLPK.R                                                  |
| gij4504795 ref NF        | 1        | 2        | 0.009        | 2671       | 304115       | 6.5 U        |                       |        |      |   | inositol 1,4,5-triphosphate receptor, type 3 [Homo sapiens]             |
| HsFLAG-Control_293_Ti_1( | 3.8378   |          | 0.3713       | 2527.53    | 2527.72      | 7401.3       | 1                     | 786.9  | 45.7 | 2 | R.GDLPDPIGTGLDPDWSAIAATQCR.L                                            |
| gij50897852 ref N        | 1        | 2        | 0.009        | 1843       | 212619       | 6 U          |                       |        |      |   | Hook-related protein 1 [Homo sapiens]                                   |
| Hs283FLP_Ti_105.1619.16  | 3.7866   |          | 0.3672       | 2011.97    | 2011.2       | 8037.7       | 1                     | 845    | 56.2 | 2 | K.ILEQENEHLNQTVSSLR.Q                                                   |

|                            |        |        |         |         |        |       |                                                            |      |                       |
|----------------------------|--------|--------|---------|---------|--------|-------|------------------------------------------------------------|------|-----------------------|
| gi 32483416 ref            | 4      | 8      | 0.009   | 1020    | 111838 | 6.1 U | neurofilament, heavy polypeptide 200kDa [Homo sapiens]     |      |                       |
| HsFLAG-Control_HeLa_S10    | 3.2971 | 0.1073 | 1133.86 | 1134.24 | 6961.9 | 1     | 1357.9                                                     | 93.8 | 3 R.KLLEGEECR.I       |
| HsFLAG-Control_HeLa_S10    | 1.9146 | 0.087  | 1005.53 | 1006.07 | 5228.8 | 2     | 405.5                                                      | 71.4 | 1 K.LLEGEECR.I        |
| HsFLAG-Control_HeLa_S10    | 2.9661 | 0.1081 | 1006.13 | 1006.07 | 3435.3 | 2     | 655.9                                                      | 92.9 | 2 K.LLEGEECR.I        |
| HsHeLa_Control_Ti_102.11   | 2.6647 | 0.1446 | 1007.08 | 1006.07 | 2807   | 2     | 532.2                                                      | 85.7 | 2 K.LLEGEECR.I        |
| gi 57634534 ref            | 1      | 2      | 0.007   | 2012    | 227918 | 6.2 U | nucleoporin 205kDa [Homo sapiens]                          |      |                       |
| * HsFLAG-Control_293_Ti_10 | 3.7099 | 0.3266 | 1503.38 | 1503.61 | 8374.8 | 1     | 1461.6                                                     | 67.9 | 2 K.ASTEGVAIQGQQGTR.L |
| gi 27436959 ref            | 2      | 2      | 0.005   | 4167    | 460996 | 6.3 U | ALMS1 [Homo sapiens]                                       |      |                       |
| * Hs283FLP_Ti_104.1233.12  | 2.459  | 0.2712 | 1212.69 | 1212.35 | 5962.9 | 2     | 502.9                                                      | 60   | 1 K.SHISNINVEAK.F     |
| * Hs283FLP_Ti_103.1527.15  | 2.2116 | 0.1868 | 979.65  | 980.106 | 4015.9 | 4     | 349.8                                                      | 75   | 1 K.TPLSAFSEK.L       |
| gi 88953266 ref            | 1      | 5      | 0.005   | 1732    | 186906 | 7.6 U | PREDICTED: hypothetical protein LOC200424 [Homo sapiens]   |      |                       |
| gi 88955191 ref            | 1      | 5      | 0.005   | 1720    | 185841 | 7.5 U | PREDICTED: similar to CXXC finger 6 [Homo sapiens]         |      |                       |
| Hs293FLP-MG_Ti_104.133     | 2.6619 | 0.2687 | 1009.72 | 1010.18 | 4367.8 | 1     | 442.3                                                      | 75   | 5 R.ELHATTPLK.K       |
| gi 28466991 ref            | 2      | 2      | 0.005   | 1649    | 182466 | 7 U   | tau tubulin kinase 2 [Homo sapiens]                        |      |                       |
| HsFLAG-Control_HeLa_S10    | 2.7801 | 0.1854 | 1153.56 | 1154.32 | 6137.9 | 6     | 488.1                                                      | 75   | 1 R.EYQELMNVK.L       |
| HsFLAG-Control_HeLa_NE     | 2.5173 | 0.1064 | 1154.14 | 1154.32 | 7891.6 | 3     | 773.6                                                      | 75   | 1 R.EYQELMNVK.L       |
| gi 54112403 ref            | 1      | 3      | 0.004   | 2997    | 335928 | 6.3 U | chromodomain helicase DNA binding protein 7 [Homo sapiens] |      |                       |
| * HsHeLa3_Ti_105.2067.206  | 3.4392 | 0.3053 | 1483.76 | 1481.69 | 5607.5 | 2     | 674.9                                                      | 62.5 | 3 K.NADVLFSSFQKPK.Q   |

|              | Proteins | Peptide ID: | Copies |
|--------------|----------|-------------|--------|
| Redundant    | 1374     | 7075        | 34834  |
| Nonredundant | 814      | 6985        | 33209  |
