# Supplementary material
Source: PubMed Central journal article supplement (PMC2234165)

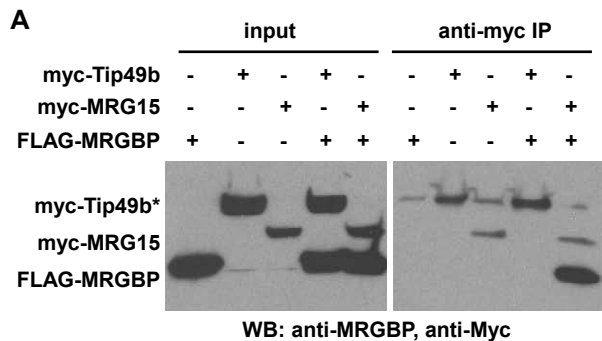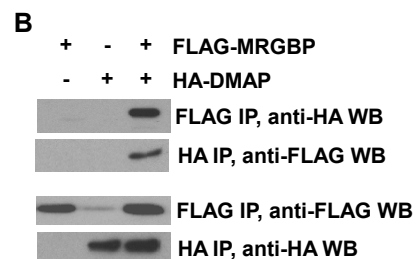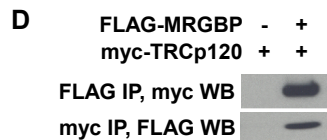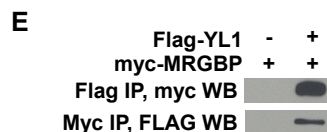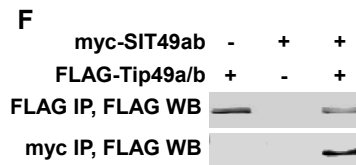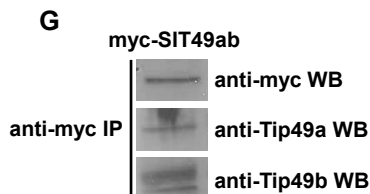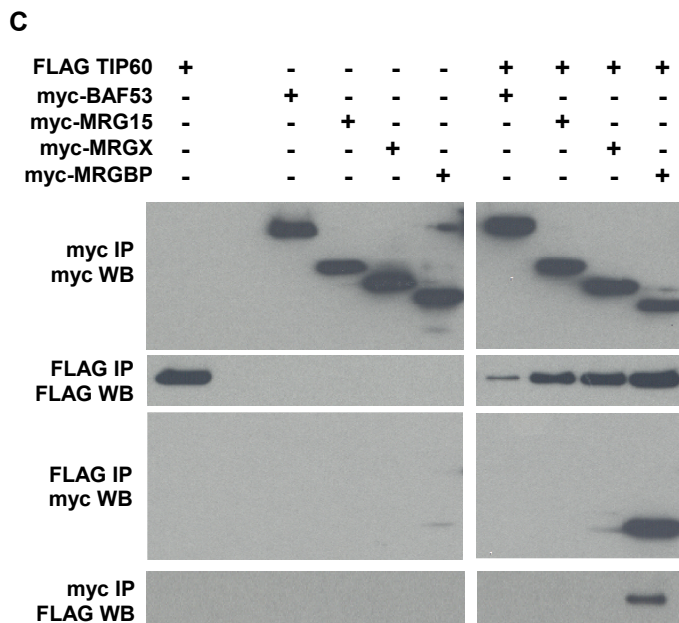

Supplement: pnas_0706983105_2.pdf [file pnas_0706983105_2.pdf]

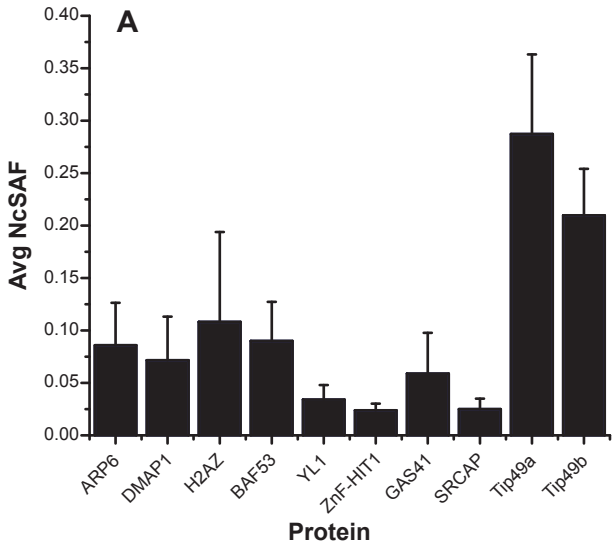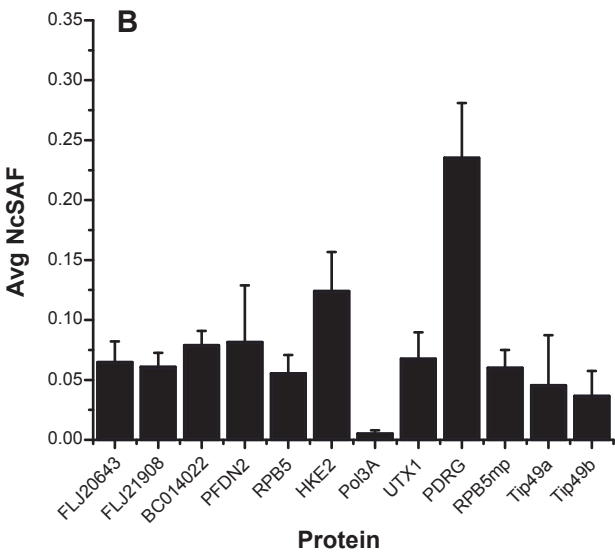

Supplement: pnas_0706983105_3.pdf [file pnas_0706983105_3.pdf]
